# Supplementary material
Source: ML conference proceedings conference paper supplement (https://proceedings.neurips.cc/paper_files/paper/2022/hash/9d3faa41886997cfc2128b930077fa49-Abstract.html)
Supplement: Supplementary file 1 [file 9d3faa41886997cfc2128b930077fa49-Supplemental-Conference.zip]

Archive with 101 entries (89 files):
- 5941_counterfactual_temporal_point__Appendix.pdf
- code/ebola/
- code/ebola/counterfactual_tpp.py
- code/ebola/data/
- code/ebola/data/ebola/
- code/ebola/data/ebola/district_adjacency.txt
- code/ebola/data/ebola/ebola_base_graph.json
- code/ebola/data/ebola/ebola_net_edge_list.csv
- code/ebola/data/ebola/rstb20160308_si_001_cleaned.csv
- code/ebola/Data_seed/
- code/ebola/Data_seed/points.npy
- code/ebola/Data_seed/seed1
- code/ebola/Data_seed/sir_obj1
- code/ebola/Data_seed/values.npy
- code/ebola/dynamics.py
- code/ebola/ebola_experiments.ipynb
- code/ebola/graph_generation.py
- code/ebola/gumbel.py
- code/ebola/map/
- code/ebola/map/generate_geopands_data.ipynb
- code/ebola/map/geojson/
- code/ebola/map/geojson/beyla.geojson
- code/ebola/map/geojson/bo.geojson
- code/ebola/map/geojson/boke.geojson
- code/ebola/map/geojson/bombali.geojson
- code/ebola/map/geojson/bomi.geojson
- code/ebola/map/geojson/bong.geojson
- code/ebola/map/geojson/conakry.geojson
- code/ebola/map/geojson/coyah.geojson
- code/ebola/map/geojson/dalaba.geojson
- code/ebola/map/geojson/dinguiraye.geojson
- code/ebola/map/geojson/dubreka.geojson
- code/ebola/map/geojson/faranah.geojson
- code/ebola/map/geojson/gbarpolu.geojson
- code/ebola/map/geojson/grand_bassa.geojson
- code/ebola/map/geojson/grand_gedeh.geojson
- code/ebola/map/geojson/grand_kru.geojson
- code/ebola/map/geojson/gueckedou.geojson
- code/ebola/map/geojson/kailahun.geojson
- code/ebola/map/geojson/kambia.geojson
- code/ebola/map/geojson/kankan.geojson
- code/ebola/map/geojson/kenema.geojson
- code/ebola/map/geojson/kerouane.geojson
- code/ebola/map/geojson/kindia.geojson
- code/ebola/map/geojson/koinadugu.geojson
- code/ebola/map/geojson/kono.geojson
- code/ebola/map/geojson/kouroussa.geojson
- code/ebola/map/geojson/lofa.geojson
- code/ebola/map/geojson/lola.geojson
- code/ebola/map/geojson/macenta.geojson
- code/ebola/map/geojson/margibi.geojson
- code/ebola/map/geojson/montserrado.geojson
- code/ebola/map/geojson/moyamba.geojson
- code/ebola/map/geojson/nimba.geojson
- code/ebola/map/geojson/nzerekore.geojson
- code/ebola/map/geojson/port_loko.geojson
- code/ebola/map/geojson/pujehun.geojson
- code/ebola/map/geojson/rivercess.geojson
- code/ebola/map/geojson/siguiri.geojson
- code/ebola/map/geojson/sinoe.geojson
- code/ebola/map/geojson/tonkolili.geojson
- code/ebola/map/geojson/tougue.geojson
- code/ebola/map/geojson/western.geojson
- code/ebola/map/geojson/yomou.geojson
- code/ebola/map/overall_data/
- code/ebola/map/overall_data/observation.json
- code/ebola/map/overall_data/percentage_0.1_bet_0.5.json
- code/ebola/map/overall_data/percentage_0.2_bet_0.1.json
- code/ebola/map/overall_data/percentage_0.25_0.json
- code/ebola/map/overall_data/percentage_0.25_1.json
- code/ebola/map/overall_data/percentage_0.25_2.json
- code/ebola/map/overall_data/percentage_0.5_bet_0.3.json
- code/ebola/map/overall_data/percentage_0.8_bet_0.1.json
- code/ebola/map/overall_data/percentage_0.8_bet_0.4.json
- code/ebola/plotutils.py
- code/ebola/sampling_utils.py
- code/ebola/settings.py
- code/README.md
- code/README.pdf
- code/requirements.txt
- code/src/
- code/src/counterfactual_tpp.py
- code/src/data_hawkes/
- code/src/data_hawkes/allevents.json
- code/src/data_hawkes/hawkes_1000_100.npy
- code/src/data_hawkes/higher_hawkes.csv
- code/src/data_hawkes/lower_hawkes.csv
- code/src/data_inhomogeneous/
- code/src/data_inhomogeneous/allindicators.json
- code/src/data_inhomogeneous/allsamples.npy
- code/src/gumbel.py
- code/src/hawkes/
- code/src/hawkes/__pycache__/
- code/src/hawkes/__pycache__/hawkes.cpython-37.pyc
- code/src/hawkes/__pycache__/hawkes.cpython-38.pyc
- code/src/hawkes/hawkes.py
- code/src/hawkes/hawkes_example.ipynb
- code/src/hawkes_experiments.ipynb
- code/src/inhomogeneous_experiments.ipynb
- code/src/sampling_utils.py
- code/src/utils.py
