# Supplementary material
Source: ML conference proceedings conference paper supplement (https://proceedings.neurips.cc/paper_files/paper/2022/hash/9d3faa41886997cfc2128b930077fa49-Abstract.html)
Supplement: Supplementary file 1 [file 9d3faa41886997cfc2128b930077fa49-Supplemental-Conference.zip › code/ebola/data/ebola/district_adjacency.txt]

0 55 gin-lbr-sle adj_mtrx_n
BEYLA 5
KANKAN KEROUANE LOLA MACENTA NZEREKORE
BOFFA 4
BOKE DUBREKA FRIA TELIMELE
BOKE 2
BOFFA TELIMELE
CONAKRY 2
DUBREKA COYAH
COYAH 4
CONAKRY DUBREKA FORECARIAH KINDIA
DABOLA 3
DINGUIRAYE FARANAH KOUROUSSA
DALABA 3
KINDIA PITA TOUGUE
DINGUIRAYE 4
DABOLA KOUROUSSA SIGUIRI TOUGUE
DUBREKA 6
BOFFA CONAKRY COYAH FRIA KINDIA TELIMELE
FARANAH 5
DABOLA GUECKEDOU KISSIDOUGO KOUROUSSA KOINADUGU
FORECARIAH 4
COYAH KINDIA BOMBALI KAMBIA
FRIA 3
BOFFA TELIMELE DUBREKA
GUECKEDOU 7
FARANAH KISSIDOUGO MACENTA LOFA KAILAHUN KOINADUGU KONO
KANKAN 5
BEYLA KEROUANE KISSIDOUGO KOUROUSSA SIGUIRI
KEROUANE 4
BEYLA KANKAN KISSIDOUGO MACENTA
KINDIA 7
COYAH DALABA DUBREKA FORECARIAH PITA TELIMELE BOMBALI
KISSIDOUGO 6
FARANAH GUECKEDOU KANKAN KEROUANE KOUROUSSA MACENTA
KOUROUSSA 6
DABOLA DINGUIRAYE FARANAH KANKAN KISSIDOUGO SIGUIRI
LOLA 3
BEYLA NZEREKORE NIMBA
MACENTA 7
BEYLA GUECKEDOU KEROUANE KISSIDOUGO NZEREKORE YOMOU LOFA
MALI 0

NZEREKORE 5
BEYLA LOLA MACENTA YOMOU NIMBA
PITA 3
DALABA KINDIA TELIMELE
SIGUIRI 3
DINGUIRAYE KANKAN KOUROUSSA
TELIMELE 6
BOFFA BOKE DUBREKA FRIA KINDIA PITA
TOUGUE 2
DALABA DINGUIRAYE
YOMOU 5
MACENTA NZEREKORE BONG LOFA NIMBA
BOMI 4
BONG GBARPOLU GRAND_CAPE_MOUNT MONTSERRADO
BONG 8
YOMOU BOMI GBARPOLU GRAND_BASSA LOFA MARGIBI MONTSERRADO NIMBA
GBARPOLU 7
BOMI BONG GRAND_CAPE_MOUNT LOFA MONTSERRADO KAILAHUN KENEMA
GRAND_BASSA 4
BONG MARGIBI NIMBA RIVERCESS
GRAND_CAPE_MOUNT 4
BOMI GBARPOLU KENEMA PUJEHUN
GRAND_GEDEH 4
NIMBA RIVER_GEE RIVERCESS SINOE
GRAND_KRU 3
MARYLAND RIVER_GEE SINOE
LOFA 6
GUECKEDOU MACENTA YOMOU BONG GBARPOLU KAILAHUN
MARGIBI 3
BONG GRAND_BASSA MONTSERRADO
MARYLAND 2
GRAND_KRU RIVER_GEE
MONTSERRADO 4
MARGIBI GBARPOLU BONG BOMI
NIMBA 8
LOLA NZEREKORE YOMOU BONG GRAND_BASSA GRAND_GEDEH RIVERCESS SINOE
RIVER_GEE 4
GRAND_GEDEH GRAND_KRU MARYLAND SINOE
RIVERCESS 4
GRAND_BASSA SINOE NIMBA GRAND_GEDEH
SINOE 5
GRAND_GEDEH GRAND_KRU NIMBA RIVER_GEE RIVERCESS
BO 5
BONTHE KENEMA MOYAMBA PUJEHUN TONKOLILI
BOMBALI 6
FORECARIAH KINDIA KAMBIA KOINADUGU PORT_LOKO TONKOLILI
BONTHE 3
BO MOYAMBA PUJEHUN
KAILAHUN 5
GUECKEDOU GBARPOLU LOFA KENEMA KONO
KAMBIA 3
FORECARIAH BOMBALI PORT_LOKO
KENEMA 7
GBARPOLU GRAND_CAPE_MOUNT BO KAILAHUN KONO PUJEHUN TONKOLILI
KOINADUGU 5
FARANAH GUECKEDOU BOMBALI KONO TONKOLILI
KONO 5
GUECKEDOU KAILAHUN KENEMA KOINADUGU TONKOLILI
MOYAMBA 5
BO BONTHE PORT_LOKO TONKOLILI WESTERN
PORT_LOKO 5
BOMBALI KAMBIA MOYAMBA TONKOLILI WESTERN
PUJEHUN 4
GRAND_CAPE_MOUNT BO BONTHE KENEMA
TONKOLILI 7
BO BOMBALI KENEMA KOINADUGU KONO MOYAMBA PORT_LOKO
WESTERN 2
PORT_LOKO MOYAMBA
