# Supplementary material
Source: ML conference proceedings conference paper supplement (https://proceedings.neurips.cc/paper_files/paper/2022/hash/9d3faa41886997cfc2128b930077fa49-Abstract.html)
Supplement: Supplementary file 1 [file 9d3faa41886997cfc2128b930077fa49-Supplemental-Conference.zip › code/ebola/data/ebola/ebola_base_graph.json]

{"directed": false, "multigraph": false, "graph": {}, "nodes": [{"size": 0.011869075548713299, "country": "Guinea", "pos": [-8.633333, 8.683333], "id": "BEYLA"}, {"size": 0.021336813687757163, "country": "Guinea", "pos": [-9.311828, 10.382789], "id": "KANKAN"}, {"size": 0.013960081568176071, "country": "Guinea", "pos": [-9.007367, 9.27026], "id": "KEROUANE"}, {"size": 0.011852956301102379, "country": "Guinea", "pos": [-8.533653, 7.802235], "id": "LOLA"}, {"size": 0.02647416617930257, "country": "Guinea", "pos": [-9.472824, 8.538294], "id": "MACENTA"}, {"size": 0.02132983027484561, "country": "Guinea", "pos": [-8.82525, 7.747836], "id": "NZEREKORE"}, {"size": 0.010414995052060626, "country": "Guinea", "pos": [-14.039161, 10.180825], "id": "BOFFA"}, {"size": 0.02518663529743097, "country": "Guinea", "pos": [-14.100133, 11.186467], "id": "BOKE"}, {"size": 0.009578516113723061, "country": "Guinea", "pos": [-13.514774, 9.790735], "id": "DUBREKA"}, {"size": 0.006804140092428818, "country": "Guinea", "pos": [-13.584187, 10.367454], "id": "FRIA"}, {"size": 0.014077460303004547, "country": "Guinea", "pos": [-13.029933, 10.908936], "id": "TELIMELE"}, {"size": 0.08271225999839381, "country": "Guinea", "pos": [-13.578401, 9.641185], "id": "CONAKRY"}, {"size": 0.019514095086245867, "country": "Guinea", "pos": [-13.387612, 9.708636], "id": "COYAH"}, {"size": 0.020030293662557565, "country": "Guinea", "pos": [-13.090435, 9.434471], "id": "FORECARIAH"}, {"size": 0.02644800229668188, "country": "Guinea", "pos": [-12.862989, 10.040672], "id": "KINDIA"}, {"size": 0.008677273195370112, "country": "Guinea", "pos": [-11.110785, 10.729781], "id": "DABOLA"}, {"size": 0.009701108492437561, "country": "Guinea", "pos": [-10.715423, 11.289951], "id": "DINGUIRAYE"}, {"size": 0.010464596416370785, "country": "Guinea", "pos": [-10.749247, 10.045102], "id": "FARANAH"}, {"size": 0.010505683756720278, "country": "Guinea", "pos": [-9.885059, 10.648923], "id": "KOUROUSSA"}, {"size": 0.0101614875970521, "country": "Guinea", "pos": [-12.24907, 10.686818], "id": "DALABA"}, {"size": 0.014397979823006835, "country": "Guinea", "pos": [-12.397943, 11.057462], "id": "PITA"}, {"size": 0.008670768098411403, "country": "Guinea", "pos": [-11.664139, 11.446422], "id": "TOUGUE"}, {"size": 0.02310796982955163, "country": "Guinea", "pos": [-9.17883, 11.414811], "id": "SIGUIRI"}, {"size": 0.03835979145998435, "country": "Guinea", "pos": [-10.131116, 8.564969], "id": "GUECKEDOU"}, {"size": 0.01577672555708622, "country": "Guinea", "pos": [-10.114318, 9.191454], "id": "KISSIDOUGO"}, {"size": 0.015573728266698261, "country": "Sierra Leone", "pos": [-11.524805, 9.530862], "id": "KOINADUGU"}, {"size": 0.024131231147475667, "country": "Sierra Leone", "pos": [-12.163272, 9.247584], "id": "BOMBALI"}, {"size": 0.014629245586208008, "country": "Sierra Leone", "pos": [-12.917652, 9.126166], "id": "KAMBIA"}, {"size": 0.01777718636667519, "country": "Liberia", "pos": [-9.723267, 8.191118], "id": "LOFA"}, {"size": 0.01932817367537452, "country": "Sierra Leone", "pos": [-10.571809, 8.28022], "id": "KAILAHUN"}, {"size": 0.023441882196233617, "country": "Sierra Leone", "pos": [-10.89031, 8.766329], "id": "KONO"}, {"size": 0.030186376289342502, "country": "Liberia", "pos": [-8.660059, 6.842761], "id": "NIMBA"}, {"size": 0.01567211785819874, "country": "Guinea", "pos": [-9.259157, 7.569628], "id": "YOMOU"}, {"size": 0.02026538595338151, "country": "Liberia", "pos": [-9.367308, 6.829502], "id": "BONG"}, {"size": 0.006962223514844512, "country": "Liberia", "pos": [-10.845147, 6.756293], "id": "BOMI"}, {"size": 0.005346137404962805, "country": "Liberia", "pos": [-10.08073, 7.495264], "id": "GBARPOLU"}, {"size": 0.007866671150081531, "country": "Liberia", "pos": [-11.071176, 7.046776], "id": "GRAND_CAPE_MOUNT"}, {"size": 0.05617835215658074, "country": "Liberia", "pos": [-10.529611, 6.552581], "id": "MONTSERRADO"}, {"size": 0.012462569983004957, "country": "Liberia", "pos": [-9.812493, 6.230845], "id": "GRAND_BASSA"}, {"size": 0.01646090869603753, "country": "Liberia", "pos": [-10.30489, 6.515187], "id": "MARGIBI"}, {"size": 0.031428036671336146, "country": "Sierra Leone", "pos": [-11.195717, 7.863215], "id": "KENEMA"}, {"size": 0.004250219893801422, "country": "Liberia", "pos": [-9.456155, 5.902533], "id": "RIVERCESS"}, {"size": 0.01336012986852099, "country": "Sierra Leone", "pos": [-11.721064, 7.356299], "id": "PUJEHUN"}, {"size": 0.007874467700112926, "country": "Liberia", "pos": [-8.221298, 5.922208], "id": "GRAND_GEDEH"}, {"size": 0.004880066340509396, "country": "Liberia", "pos": [-7.87216, 5.260489], "id": "RIVER_GEE"}, {"size": 0.005959960267250429, "country": "Liberia", "pos": [-8.660059, 5.49871], "id": "SINOE"}, {"size": 0.0035883741098480327, "country": "Liberia", "pos": [-8.221298, 4.761386], "id": "GRAND_KRU"}, {"size": 0.006946486919995869, "country": "Liberia", "pos": [-7.74167, 4.725888], "id": "MARYLAND"}, {"size": 0.027871757561924098, "country": "Sierra Leone", "pos": [-11.471, 7.9552], "id": "BO"}, {"size": 0.007542755586814035, "country": "Sierra Leone", "pos": [-12.503992, 7.525703], "id": "BONTHE"}, {"size": 0.01550135906303262, "country": "Sierra Leone", "pos": [-12.435192, 8.162051], "id": "MOYAMBA"}, {"size": 0.02100601037476868, "country": "Sierra Leone", "pos": [-11.797961, 8.738942], "id": "TONKOLILI"}, {"size": 0.02675158943195341, "country": "Sierra Leone", "pos": [-12.785352, 8.768689], "id": "PORT_LOKO"}, {"size": 0.05398297759620692, "country": "Sierra Leone", "pos": [-13.035694, 8.311498], "id": "WESTERN"}, {"size": 0.011360912680409417, "country": "Guinea", "pos": [-12.297718, 12.074294], "id": "MALI"}], "links": [{"source": "BEYLA", "target": "KANKAN"}, {"source": "BEYLA", "target": "KEROUANE"}, {"source": "BEYLA", "target": "LOLA"}, {"source": "BEYLA", "target": "MACENTA"}, {"source": "BEYLA", "target": "NZEREKORE"}, {"source": "KANKAN", "target": "KEROUANE"}, {"source": "KANKAN", "target": "KISSIDOUGO"}, {"source": "KANKAN", "target": "KOUROUSSA"}, {"source": "KANKAN", "target": "SIGUIRI"}, {"source": "KEROUANE", "target": "KISSIDOUGO"}, {"source": "KEROUANE", "target": "MACENTA"}, {"source": "LOLA", "target": "NZEREKORE"}, {"source": "LOLA", "target": "NIMBA"}, {"source": "MACENTA", "target": "GUECKEDOU"}, {"source": "MACENTA", "target": "KISSIDOUGO"}, {"source": "MACENTA", "target": "NZEREKORE"}, {"source": "MACENTA", "target": "YOMOU"}, {"source": "MACENTA", "target": "LOFA"}, {"source": "NZEREKORE", "target": "YOMOU"}, {"source": "NZEREKORE", "target": "NIMBA"}, {"source": "BOFFA", "target": "BOKE"}, {"source": "BOFFA", "target": "DUBREKA"}, {"source": "BOFFA", "target": "FRIA"}, {"source": "BOFFA", "target": "TELIMELE"}, {"source": "BOKE", "target": "TELIMELE"}, {"source": "DUBREKA", "target": "CONAKRY"}, {"source": "DUBREKA", "target": "COYAH"}, {"source": "DUBREKA", "target": "FRIA"}, {"source": "DUBREKA", "target": "KINDIA"}, {"source": "DUBREKA", "target": "TELIMELE"}, {"source": "FRIA", "target": "TELIMELE"}, {"source": "TELIMELE", "target": "KINDIA"}, {"source": "TELIMELE", "target": "PITA"}, {"source": "CONAKRY", "target": "COYAH"}, {"source": "COYAH", "target": "FORECARIAH"}, {"source": "COYAH", "target": "KINDIA"}, {"source": "FORECARIAH", "target": "KINDIA"}, {"source": "FORECARIAH", "target": "BOMBALI"}, {"source": "FORECARIAH", "target": "KAMBIA"}, {"source": "KINDIA", "target": "DALABA"}, {"source": "KINDIA", "target": "PITA"}, {"source": "KINDIA", "target": "BOMBALI"}, {"source": "DABOLA", "target": "DINGUIRAYE"}, {"source": "DABOLA", "target": "FARANAH"}, {"source": "DABOLA", "target": "KOUROUSSA"}, {"source": "DABOLA", "target": "DALABA"}, {"source": "DINGUIRAYE", "target": "KOUROUSSA"}, {"source": "DINGUIRAYE", "target": "SIGUIRI"}, {"source": "DINGUIRAYE", "target": "TOUGUE"}, {"source": "FARANAH", "target": "GUECKEDOU"}, {"source": "FARANAH", "target": "KISSIDOUGO"}, {"source": "FARANAH", "target": "KOUROUSSA"}, {"source": "FARANAH", "target": "KOINADUGU"}, {"source": "FARANAH", "target": "DALABA"}, {"source": "KOUROUSSA", "target": "KISSIDOUGO"}, {"source": "KOUROUSSA", "target": "SIGUIRI"}, {"source": "DALABA", "target": "PITA"}, {"source": "DALABA", "target": "TOUGUE"}, {"source": "PITA", "target": "MALI"}, {"source": "TOUGUE", "target": "MALI"}, {"source": "GUECKEDOU", "target": "KISSIDOUGO"}, {"source": "GUECKEDOU", "target": "LOFA"}, {"source": "GUECKEDOU", "target": "KAILAHUN"}, {"source": "GUECKEDOU", "target": "KOINADUGU"}, {"source": "GUECKEDOU", "target": "KONO"}, {"source": "KOINADUGU", "target": "BOMBALI"}, {"source": "KOINADUGU", "target": "KONO"}, {"source": "KOINADUGU", "target": "TONKOLILI"}, {"source": "BOMBALI", "target": "KAMBIA"}, {"source": "BOMBALI", "target": "PORT_LOKO"}, {"source": "BOMBALI", "target": "TONKOLILI"}, {"source": "KAMBIA", "target": "PORT_LOKO"}, {"source": "LOFA", "target": "YOMOU"}, {"source": "LOFA", "target": "BONG"}, {"source": "LOFA", "target": "GBARPOLU"}, {"source": "LOFA", "target": "KAILAHUN"}, {"source": "KAILAHUN", "target": "GBARPOLU"}, {"source": "KAILAHUN", "target": "KENEMA"}, {"source": "KAILAHUN", "target": "KONO"}, {"source": "KONO", "target": "KENEMA"}, {"source": "KONO", "target": "TONKOLILI"}, {"source": "NIMBA", "target": "YOMOU"}, {"source": "NIMBA", "target": "BONG"}, {"source": "NIMBA", "target": "GRAND_BASSA"}, {"source": "NIMBA", "target": "GRAND_GEDEH"}, {"source": "NIMBA", "target": "RIVERCESS"}, {"source": "NIMBA", "target": "SINOE"}, {"source": "YOMOU", "target": "BONG"}, {"source": "BONG", "target": "BOMI"}, {"source": "BONG", "target": "GBARPOLU"}, {"source": "BONG", "target": "GRAND_BASSA"}, {"source": "BONG", "target": "MARGIBI"}, {"source": "BONG", "target": "MONTSERRADO"}, {"source": "BOMI", "target": "GBARPOLU"}, {"source": "BOMI", "target": "GRAND_CAPE_MOUNT"}, {"source": "BOMI", "target": "MONTSERRADO"}, {"source": "GBARPOLU", "target": "GRAND_CAPE_MOUNT"}, {"source": "GBARPOLU", "target": "MONTSERRADO"}, {"source": "GBARPOLU", "target": "KENEMA"}, {"source": "GRAND_CAPE_MOUNT", "target": "KENEMA"}, {"source": "GRAND_CAPE_MOUNT", "target": "PUJEHUN"}, {"source": "MONTSERRADO", "target": "MARGIBI"}, {"source": "GRAND_BASSA", "target": "MARGIBI"}, {"source": "GRAND_BASSA", "target": "RIVERCESS"}, {"source": "KENEMA", "target": "BO"}, {"source": "KENEMA", "target": "PUJEHUN"}, {"source": "KENEMA", "target": "TONKOLILI"}, {"source": "RIVERCESS", "target": "SINOE"}, {"source": "RIVERCESS", "target": "GRAND_GEDEH"}, {"source": "PUJEHUN", "target": "BO"}, {"source": "PUJEHUN", "target": "BONTHE"}, {"source": "GRAND_GEDEH", "target": "RIVER_GEE"}, {"source": "GRAND_GEDEH", "target": "SINOE"}, {"source": "RIVER_GEE", "target": "GRAND_KRU"}, {"source": "RIVER_GEE", "target": "MARYLAND"}, {"source": "RIVER_GEE", "target": "SINOE"}, {"source": "SINOE", "target": "GRAND_KRU"}, {"source": "GRAND_KRU", "target": "MARYLAND"}, {"source": "BO", "target": "BONTHE"}, {"source": "BO", "target": "MOYAMBA"}, {"source": "BO", "target": "TONKOLILI"}, {"source": "BONTHE", "target": "MOYAMBA"}, {"source": "MOYAMBA", "target": "PORT_LOKO"}, {"source": "MOYAMBA", "target": "TONKOLILI"}, {"source": "MOYAMBA", "target": "WESTERN"}, {"source": "TONKOLILI", "target": "PORT_LOKO"}, {"source": "PORT_LOKO", "target": "WESTERN"}]}
