# Supplementary material
Source: ML conference proceedings conference paper supplement (https://proceedings.neurips.cc/paper_files/paper/2022/hash/9d3faa41886997cfc2128b930077fa49-Abstract.html)
Supplement: Supplementary file 1 [file 9d3faa41886997cfc2128b930077fa49-Supplemental-Conference.zip › code/ebola/data/ebola/ebola_net_edge_list.csv]

BEYLA KANKAN
BEYLA KEROUANE
BEYLA LOLA
BEYLA MACENTA
BEYLA NZEREKORE
KANKAN KEROUANE
KANKAN KISSIDOUGO
KANKAN KOUROUSSA
KANKAN SIGUIRI
KEROUANE KISSIDOUGO
KEROUANE MACENTA
LOLA NZEREKORE
LOLA NIMBA
MACENTA GUECKEDOU
MACENTA KISSIDOUGO
MACENTA NZEREKORE
MACENTA YOMOU
MACENTA LOFA
NZEREKORE YOMOU
NZEREKORE NIMBA
KISSIDOUGO FARANAH
KISSIDOUGO KOUROUSSA
KISSIDOUGO GUECKEDOU
KOUROUSSA DABOLA
KOUROUSSA DINGUIRAYE
KOUROUSSA FARANAH
KOUROUSSA SIGUIRI
SIGUIRI DINGUIRAYE
NIMBA YOMOU
NIMBA BONG
NIMBA GRAND_BASSA
NIMBA GRAND_GEDEH
NIMBA RIVERCESS
NIMBA SINOE
GUECKEDOU FARANAH
GUECKEDOU LOFA
GUECKEDOU KAILAHUN
GUECKEDOU KOINADUGU
GUECKEDOU KONO
YOMOU LOFA
YOMOU BONG
LOFA BONG
LOFA GBARPOLU
LOFA KAILAHUN
BOFFA BOKE
BOFFA DUBREKA
BOFFA FRIA
BOFFA TELIMELE
BOKE TELIMELE
DUBREKA CONAKRY
DUBREKA COYAH
DUBREKA FRIA
DUBREKA KINDIA
DUBREKA TELIMELE
FRIA TELIMELE
TELIMELE KINDIA
TELIMELE PITA
CONAKRY COYAH
COYAH FORECARIAH
COYAH KINDIA
KINDIA FORECARIAH
KINDIA DALABA
KINDIA PITA
KINDIA BOMBALI
PITA DALABA
PITA MALI
FORECARIAH BOMBALI
FORECARIAH KAMBIA
BOMBALI KOINADUGU
BOMBALI KAMBIA
BOMBALI PORT_LOKO
BOMBALI TONKOLILI
KAMBIA PORT_LOKO
DALABA DABOLA
DALABA FARANAH
DALABA TOUGUE
DABOLA DINGUIRAYE
DABOLA FARANAH
DINGUIRAYE TOUGUE
FARANAH KOINADUGU
TOUGUE MALI
KOINADUGU KONO
KOINADUGU TONKOLILI
KAILAHUN GBARPOLU
KAILAHUN KENEMA
KAILAHUN KONO
KONO KENEMA
KONO TONKOLILI
TONKOLILI KENEMA
TONKOLILI BO
TONKOLILI MOYAMBA
TONKOLILI PORT_LOKO
PORT_LOKO MOYAMBA
PORT_LOKO WESTERN
BONG BOMI
BONG GBARPOLU
BONG GRAND_BASSA
BONG MARGIBI
BONG MONTSERRADO
GBARPOLU BOMI
GBARPOLU GRAND_CAPE_MOUNT
GBARPOLU MONTSERRADO
GBARPOLU KENEMA
KENEMA GRAND_CAPE_MOUNT
KENEMA BO
KENEMA PUJEHUN
GRAND_BASSA MARGIBI
GRAND_BASSA RIVERCESS
GRAND_GEDEH RIVERCESS
GRAND_GEDEH RIVER_GEE
GRAND_GEDEH SINOE
RIVERCESS SINOE
SINOE RIVER_GEE
SINOE GRAND_KRU
BOMI GRAND_CAPE_MOUNT
BOMI MONTSERRADO
MARGIBI MONTSERRADO
GRAND_CAPE_MOUNT PUJEHUN
PUJEHUN BO
PUJEHUN BONTHE
BO BONTHE
BO MOYAMBA
BONTHE MOYAMBA
RIVER_GEE GRAND_KRU
RIVER_GEE MARYLAND
GRAND_KRU MARYLAND
MOYAMBA WESTERN
