# Supplementary material
Source: ML conference proceedings conference paper supplement (https://proceedings.neurips.cc/paper_files/paper/2022/hash/9d3faa41886997cfc2128b930077fa49-Abstract.html)
Supplement: Supplementary file 1 [file 9d3faa41886997cfc2128b930077fa49-Supplemental-Conference.zip › code/ebola/data/ebola/rstb20160308_si_001_cleaned.csv]

district	infection_date	infection_timestamp	recovery_timestamp_mean	recovery_timestamp_min	recovery_timestamp_max
WESTERN	2013-12-26	0.0	11.4	5.9	16.9
PUJEHUN	2013-12-26	0.0	11.4	5.9	16.9
TONKOLILI	2014-01-01	6.0	17.4	11.899999999999999	22.9
WESTERN	2014-01-01	6.0	17.4	11.899999999999999	22.9
GUECKEDOU	2014-01-01	6.0	17.4	11.899999999999999	22.9
GUECKEDOU	2014-01-01	6.0	17.4	11.899999999999999	22.9
GUECKEDOU	2014-01-06	11.0	22.4	16.9	27.9
GUECKEDOU	2014-01-15	20.0	31.4	25.9	36.9
GUECKEDOU	2014-01-20	25.0	36.4	30.9	41.9
GUECKEDOU	2014-01-25	30.0	41.4	35.9	46.9
WESTERN	2014-01-26	31.0	42.4	36.9	47.9
GUECKEDOU	2014-01-29	34.0	45.4	39.9	50.9
GUECKEDOU	2014-02-01	37.0	48.4	42.9	53.9
GUECKEDOU	2014-02-02	38.0	49.4	43.9	54.9
GUECKEDOU	2014-02-03	39.0	50.4	44.9	55.9
GUECKEDOU	2014-02-03	39.0	50.4	44.9	55.9
GUECKEDOU	2014-02-04	40.0	51.4	45.9	56.9
GUECKEDOU	2014-02-04	40.0	51.4	45.9	56.9
GUECKEDOU	2014-02-11	47.0	58.4	52.9	63.9
WESTERN	2014-02-15	51.0	62.4	56.9	67.9
GUECKEDOU	2014-02-16	52.0	63.4	57.9	68.9
MACENTA	2014-02-17	53.0	64.4	58.900000000000006	69.9
GUECKEDOU	2014-02-18	54.0	65.4	59.900000000000006	70.9
MACENTA	2014-02-19	55.0	66.4	60.900000000000006	71.9
GUECKEDOU	2014-02-21	57.0	68.4	62.900000000000006	73.9
GUECKEDOU	2014-02-23	59.0	70.4	64.9	75.9
BONG	2014-02-24	60.0	71.4	65.9	76.9
GUECKEDOU	2014-02-25	61.0	72.4	66.9	77.9
MACENTA	2014-02-25	61.0	72.4	66.9	77.9
GUECKEDOU	2014-02-27	63.0	74.4	68.9	79.9
WESTERN	2014-02-28	64.0	75.4	69.9	80.9
MONTSERRADO	2014-02-28	64.0	75.4	69.9	80.9
NIMBA	2014-03-01	65.0	76.4	70.9	81.9
KISSIDOUGO	2014-03-01	65.0	76.4	70.9	81.9
MACENTA	2014-03-01	65.0	76.4	70.9	81.9
MACENTA	2014-03-01	65.0	76.4	70.9	81.9
GUECKEDOU	2014-03-01	65.0	76.4	70.9	81.9
GUECKEDOU	2014-03-01	65.0	76.4	70.9	81.9
WESTERN	2014-03-01	65.0	76.4	70.9	81.9
GUECKEDOU	2014-03-01	65.0	76.4	70.9	81.9
GUECKEDOU	2014-03-01	65.0	76.4	70.9	81.9
BOMI	2014-03-03	67.0	78.4	72.9	83.9
WESTERN	2014-03-03	67.0	78.4	72.9	83.9
GUECKEDOU	2014-03-03	67.0	78.4	72.9	83.9
CONAKRY	2014-03-05	69.0	80.4	74.9	85.9
GUECKEDOU	2014-03-06	70.0	81.4	75.9	86.9
MACENTA	2014-03-07	71.0	82.4	76.9	87.9
MACENTA	2014-03-07	71.0	82.4	76.9	87.9
GUECKEDOU	2014-03-07	71.0	82.4	76.9	87.9
MACENTA	2014-03-07	71.0	82.4	76.9	87.9
GUECKEDOU	2014-03-08	72.0	83.4	77.9	88.9
KISSIDOUGO	2014-03-09	73.0	84.4	78.9	89.9
GUECKEDOU	2014-03-10	74.0	85.4	79.9	90.9
GUECKEDOU	2014-03-10	74.0	85.4	79.9	90.9
GUECKEDOU	2014-03-10	74.0	85.4	79.9	90.9
KISSIDOUGO	2014-03-11	75.0	86.4	80.9	91.9
LOFA	2014-03-11	75.0	86.4	80.9	91.9
GUECKEDOU	2014-03-11	75.0	86.4	80.9	91.9
GUECKEDOU	2014-03-11	75.0	86.4	80.9	91.9
MACENTA	2014-03-12	76.0	87.4	81.9	92.9
GUECKEDOU	2014-03-12	76.0	87.4	81.9	92.9
GUECKEDOU	2014-03-12	76.0	87.4	81.9	92.9
GUECKEDOU	2014-03-12	76.0	87.4	81.9	92.9
GUECKEDOU	2014-03-12	76.0	87.4	81.9	92.9
GUECKEDOU	2014-03-12	76.0	87.4	81.9	92.9
MACENTA	2014-03-12	76.0	87.4	81.9	92.9
GUECKEDOU	2014-03-12	76.0	87.4	81.9	92.9
KOUROUSSA	2014-03-13	77.0	88.4	82.9	93.9
KISSIDOUGO	2014-03-13	77.0	88.4	82.9	93.9
GUECKEDOU	2014-03-13	77.0	88.4	82.9	93.9
CONAKRY	2014-03-13	77.0	88.4	82.9	93.9
GUECKEDOU	2014-03-14	78.0	89.4	83.9	94.9
CONAKRY	2014-03-14	78.0	89.4	83.9	94.9
GUECKEDOU	2014-03-14	78.0	89.4	83.9	94.9
GUECKEDOU	2014-03-15	79.0	90.4	84.9	95.9
GUECKEDOU	2014-03-15	79.0	90.4	84.9	95.9
GUECKEDOU	2014-03-15	79.0	90.4	84.9	95.9
GUECKEDOU	2014-03-15	79.0	90.4	84.9	95.9
GUECKEDOU	2014-03-16	80.0	91.4	85.9	96.9
CONAKRY	2014-03-16	80.0	91.4	85.9	96.9
GUECKEDOU	2014-03-16	80.0	91.4	85.9	96.9
GUECKEDOU	2014-03-17	81.0	92.4	86.9	97.9
MARGIBI	2014-03-17	81.0	92.4	86.9	97.9
BONG	2014-03-18	82.0	93.4	87.9	98.9
KISSIDOUGO	2014-03-18	82.0	93.4	87.9	98.9
NIMBA	2014-03-18	82.0	93.4	87.9	98.9
GUECKEDOU	2014-03-19	83.0	94.4	88.9	99.9
GUECKEDOU	2014-03-19	83.0	94.4	88.9	99.9
GUECKEDOU	2014-03-19	83.0	94.4	88.9	99.9
DABOLA	2014-03-20	84.0	95.4	89.9	100.9
MACENTA	2014-03-20	84.0	95.4	89.9	100.9
CONAKRY	2014-03-20	84.0	95.4	89.9	100.9
CONAKRY	2014-03-20	84.0	95.4	89.9	100.9
GUECKEDOU	2014-03-20	84.0	95.4	89.9	100.9
WESTERN	2014-03-20	84.0	95.4	89.9	100.9
DABOLA	2014-03-21	85.0	96.4	90.9	101.9
GUECKEDOU	2014-03-21	85.0	96.4	90.9	101.9
GUECKEDOU	2014-03-21	85.0	96.4	90.9	101.9
CONAKRY	2014-03-21	85.0	96.4	90.9	101.9
GUECKEDOU	2014-03-22	86.0	97.4	91.9	102.9
CONAKRY	2014-03-22	86.0	97.4	91.9	102.9
GUECKEDOU	2014-03-22	86.0	97.4	91.9	102.9
MACENTA	2014-03-22	86.0	97.4	91.9	102.9
MACENTA	2014-03-22	86.0	97.4	91.9	102.9
GUECKEDOU	2014-03-22	86.0	97.4	91.9	102.9
GUECKEDOU	2014-03-23	87.0	98.4	92.9	103.9
MARGIBI	2014-03-23	87.0	98.4	92.9	103.9
CONAKRY	2014-03-23	87.0	98.4	92.9	103.9
GUECKEDOU	2014-03-23	87.0	98.4	92.9	103.9
CONAKRY	2014-03-24	88.0	99.4	93.9	104.9
CONAKRY	2014-03-24	88.0	99.4	93.9	104.9
CONAKRY	2014-03-24	88.0	99.4	93.9	104.9
CONAKRY	2014-03-24	88.0	99.4	93.9	104.9
MACENTA	2014-03-24	88.0	99.4	93.9	104.9
GUECKEDOU	2014-03-25	89.0	100.4	94.9	105.9
BONG	2014-03-25	89.0	100.4	94.9	105.9
CONAKRY	2014-03-25	89.0	100.4	94.9	105.9
CONAKRY	2014-03-25	89.0	100.4	94.9	105.9
CONAKRY	2014-03-25	89.0	100.4	94.9	105.9
MACENTA	2014-03-25	89.0	100.4	94.9	105.9
CONAKRY	2014-03-26	90.0	101.4	95.9	106.9
WESTERN	2014-03-26	90.0	101.4	95.9	106.9
CONAKRY	2014-03-26	90.0	101.4	95.9	106.9
GUECKEDOU	2014-03-27	91.0	102.4	96.9	107.9
GUECKEDOU	2014-03-27	91.0	102.4	96.9	107.9
GUECKEDOU	2014-03-27	91.0	102.4	96.9	107.9
LOFA	2014-03-28	92.0	103.4	97.9	108.9
LOFA	2014-03-28	92.0	103.4	97.9	108.9
NIMBA	2014-03-28	92.0	103.4	97.9	108.9
MACENTA	2014-03-28	92.0	103.4	97.9	108.9
CONAKRY	2014-03-28	92.0	103.4	97.9	108.9
MACENTA	2014-03-29	93.0	104.4	98.9	109.9
KISSIDOUGO	2014-03-29	93.0	104.4	98.9	109.9
BONG	2014-03-29	93.0	104.4	98.9	109.9
DABOLA	2014-03-29	93.0	104.4	98.9	109.9
GUECKEDOU	2014-03-29	93.0	104.4	98.9	109.9
NIMBA	2014-03-30	94.0	105.4	99.9	110.9
GUECKEDOU	2014-03-30	94.0	105.4	99.9	110.9
GUECKEDOU	2014-03-30	94.0	105.4	99.9	110.9
MACENTA	2014-03-30	94.0	105.4	99.9	110.9
GUECKEDOU	2014-03-30	94.0	105.4	99.9	110.9
LOFA	2014-03-30	94.0	105.4	99.9	110.9
NIMBA	2014-03-30	94.0	105.4	99.9	110.9
GUECKEDOU	2014-03-30	94.0	105.4	99.9	110.9
GUECKEDOU	2014-03-30	94.0	105.4	99.9	110.9
CONAKRY	2014-03-30	94.0	105.4	99.9	110.9
LOFA	2014-03-31	95.0	106.4	100.9	111.9
GUECKEDOU	2014-04-01	96.0	107.4	101.9	112.9
CONAKRY	2014-04-01	96.0	107.4	101.9	112.9
NIMBA	2014-04-02	97.0	108.4	102.9	113.9
CONAKRY	2014-04-03	98.0	109.4	103.9	114.9
CONAKRY	2014-04-03	98.0	109.4	103.9	114.9
PUJEHUN	2014-04-04	99.0	110.4	104.9	115.9
WESTERN	2014-04-04	99.0	110.4	104.9	115.9
CONAKRY	2014-04-05	100.0	111.4	105.9	116.9
MONTSERRADO	2014-04-05	100.0	111.4	105.9	116.9
GUECKEDOU	2014-04-06	101.0	112.4	106.9	117.9
GUECKEDOU	2014-04-06	101.0	112.4	106.9	117.9
GUECKEDOU	2014-04-06	101.0	112.4	106.9	117.9
BONG	2014-04-06	101.0	112.4	106.9	117.9
GUECKEDOU	2014-04-06	101.0	112.4	106.9	117.9
WESTERN	2014-04-06	101.0	112.4	106.9	117.9
GUECKEDOU	2014-04-06	101.0	112.4	106.9	117.9
MARGIBI	2014-04-06	101.0	112.4	106.9	117.9
GUECKEDOU	2014-04-07	102.0	113.4	107.9	118.9
CONAKRY	2014-04-07	102.0	113.4	107.9	118.9
CONAKRY	2014-04-07	102.0	113.4	107.9	118.9
GUECKEDOU	2014-04-07	102.0	113.4	107.9	118.9
CONAKRY	2014-04-08	103.0	114.4	108.9	119.9
GUECKEDOU	2014-04-08	103.0	114.4	108.9	119.9
GUECKEDOU	2014-04-08	103.0	114.4	108.9	119.9
GUECKEDOU	2014-04-08	103.0	114.4	108.9	119.9
CONAKRY	2014-04-08	103.0	114.4	108.9	119.9
GUECKEDOU	2014-04-08	103.0	114.4	108.9	119.9
CONAKRY	2014-04-08	103.0	114.4	108.9	119.9
GUECKEDOU	2014-04-09	104.0	115.4	109.9	120.9
CONAKRY	2014-04-09	104.0	115.4	109.9	120.9
GUECKEDOU	2014-04-09	104.0	115.4	109.9	120.9
GUECKEDOU	2014-04-09	104.0	115.4	109.9	120.9
WESTERN	2014-04-09	104.0	115.4	109.9	120.9
NIMBA	2014-04-09	104.0	115.4	109.9	120.9
CONAKRY	2014-04-09	104.0	115.4	109.9	120.9
CONAKRY	2014-04-09	104.0	115.4	109.9	120.9
GUECKEDOU	2014-04-09	104.0	115.4	109.9	120.9
CONAKRY	2014-04-10	105.0	116.4	110.9	121.9
BONG	2014-04-10	105.0	116.4	110.9	121.9
CONAKRY	2014-04-10	105.0	116.4	110.9	121.9
CONAKRY	2014-04-10	105.0	116.4	110.9	121.9
CONAKRY	2014-04-10	105.0	116.4	110.9	121.9
WESTERN	2014-04-10	105.0	116.4	110.9	121.9
GUECKEDOU	2014-04-11	106.0	117.4	111.9	122.9
CONAKRY	2014-04-11	106.0	117.4	111.9	122.9
GUECKEDOU	2014-04-12	107.0	118.4	112.9	123.9
WESTERN	2014-04-12	107.0	118.4	112.9	123.9
GUECKEDOU	2014-04-13	108.0	119.4	113.9	124.9
GUECKEDOU	2014-04-13	108.0	119.4	113.9	124.9
CONAKRY	2014-04-14	109.0	120.4	114.9	125.9
GUECKEDOU	2014-04-14	109.0	120.4	114.9	125.9
GUECKEDOU	2014-04-14	109.0	120.4	114.9	125.9
GUECKEDOU	2014-04-17	112.0	123.4	117.9	128.9
GUECKEDOU	2014-04-18	113.0	124.4	118.9	129.9
GUECKEDOU	2014-04-18	113.0	124.4	118.9	129.9
GUECKEDOU	2014-04-18	113.0	124.4	118.9	129.9
GUECKEDOU	2014-04-18	113.0	124.4	118.9	129.9
GUECKEDOU	2014-04-19	114.0	125.4	119.9	130.9
GUECKEDOU	2014-04-21	116.0	127.4	121.9	132.9
GUECKEDOU	2014-04-22	117.0	128.4	122.9	133.9
CONAKRY	2014-04-22	117.0	128.4	122.9	133.9
GRAND_GEDEH	2014-04-23	118.0	129.4	123.9	134.9
CONAKRY	2014-04-23	118.0	129.4	123.9	134.9
TELIMELE	2014-04-24	119.0	130.4	124.9	135.9
GUECKEDOU	2014-04-27	122.0	133.4	127.9	138.9
KONO	2014-04-30	125.0	136.4	130.9	141.9
WESTERN	2014-05-01	126.0	137.4	131.9	142.9
GUECKEDOU	2014-05-02	127.0	138.4	132.9	143.9
BOFFA	2014-05-02	127.0	138.4	132.9	143.9
GUECKEDOU	2014-05-03	128.0	139.4	133.9	144.9
GUECKEDOU	2014-05-03	128.0	139.4	133.9	144.9
GUECKEDOU	2014-05-05	130.0	141.4	135.9	146.9
GUECKEDOU	2014-05-05	130.0	141.4	135.9	146.9
GUECKEDOU	2014-05-05	130.0	141.4	135.9	146.9
GUECKEDOU	2014-05-05	130.0	141.4	135.9	146.9
WESTERN	2014-05-06	131.0	142.4	136.9	147.9
TELIMELE	2014-05-06	131.0	142.4	136.9	147.9
MOYAMBA	2014-05-06	131.0	142.4	136.9	147.9
TELIMELE	2014-05-06	131.0	142.4	136.9	147.9
GUECKEDOU	2014-05-07	132.0	143.4	137.9	148.9
LOFA	2014-05-07	132.0	143.4	137.9	148.9
KOINADUGU	2014-05-08	133.0	144.4	138.9	149.9
GUECKEDOU	2014-05-08	133.0	144.4	138.9	149.9
GUECKEDOU	2014-05-09	134.0	145.4	139.9	150.9
WESTERN	2014-05-10	135.0	146.4	140.9	151.9
MONTSERRADO	2014-05-10	135.0	146.4	140.9	151.9
GUECKEDOU	2014-05-10	135.0	146.4	140.9	151.9
GUECKEDOU	2014-05-11	136.0	147.4	141.9	152.9
KENEMA	2014-05-11	136.0	147.4	141.9	152.9
GUECKEDOU	2014-05-12	137.0	148.4	142.9	153.9
KENEMA	2014-05-13	138.0	149.4	143.9	154.9
WESTERN	2014-05-13	138.0	149.4	143.9	154.9
TELIMELE	2014-05-14	139.0	150.4	144.9	155.9
MONTSERRADO	2014-05-15	140.0	151.4	145.9	156.9
GUECKEDOU	2014-05-15	140.0	151.4	145.9	156.9
MACENTA	2014-05-15	140.0	151.4	145.9	156.9
KAILAHUN	2014-05-15	140.0	151.4	145.9	156.9
MONTSERRADO	2014-05-15	140.0	151.4	145.9	156.9
GUECKEDOU	2014-05-15	140.0	151.4	145.9	156.9
GUECKEDOU	2014-05-15	140.0	151.4	145.9	156.9
MONTSERRADO	2014-05-16	141.0	152.4	146.9	157.9
KOUROUSSA	2014-05-16	141.0	152.4	146.9	157.9
GUECKEDOU	2014-05-16	141.0	152.4	146.9	157.9
KOINADUGU	2014-05-17	142.0	153.4	147.9	158.9
MACENTA	2014-05-17	142.0	153.4	147.9	158.9
BOFFA	2014-05-18	143.0	154.4	148.9	159.9
GUECKEDOU	2014-05-18	143.0	154.4	148.9	159.9
CONAKRY	2014-05-18	143.0	154.4	148.9	159.9
GUECKEDOU	2014-05-19	144.0	155.4	149.9	160.9
BOFFA	2014-05-19	144.0	155.4	149.9	160.9
BOFFA	2014-05-19	144.0	155.4	149.9	160.9
MACENTA	2014-05-19	144.0	155.4	149.9	160.9
GUECKEDOU	2014-05-19	144.0	155.4	149.9	160.9
MACENTA	2014-05-19	144.0	155.4	149.9	160.9
GUECKEDOU	2014-05-20	145.0	156.4	150.9	161.9
LOFA	2014-05-20	145.0	156.4	150.9	161.9
BOFFA	2014-05-20	145.0	156.4	150.9	161.9
KAILAHUN	2014-05-20	145.0	156.4	150.9	161.9
GUECKEDOU	2014-05-20	145.0	156.4	150.9	161.9
MACENTA	2014-05-21	146.0	157.4	151.9	162.9
BOFFA	2014-05-21	146.0	157.4	151.9	162.9
TELIMELE	2014-05-21	146.0	157.4	151.9	162.9
WESTERN	2014-05-21	146.0	157.4	151.9	162.9
GUECKEDOU	2014-05-21	146.0	157.4	151.9	162.9
BOFFA	2014-05-22	147.0	158.4	152.9	163.9
KAILAHUN	2014-05-22	147.0	158.4	152.9	163.9
KAILAHUN	2014-05-22	147.0	158.4	152.9	163.9
TELIMELE	2014-05-22	147.0	158.4	152.9	163.9
MONTSERRADO	2014-05-22	147.0	158.4	152.9	163.9
TELIMELE	2014-05-23	148.0	159.4	153.9	164.9
CONAKRY	2014-05-23	148.0	159.4	153.9	164.9
TELIMELE	2014-05-23	148.0	159.4	153.9	164.9
CONAKRY	2014-05-23	148.0	159.4	153.9	164.9
TELIMELE	2014-05-23	148.0	159.4	153.9	164.9
CONAKRY	2014-05-23	148.0	159.4	153.9	164.9
MONTSERRADO	2014-05-24	149.0	160.4	154.9	165.9
KAILAHUN	2014-05-24	149.0	160.4	154.9	165.9
KAILAHUN	2014-05-24	149.0	160.4	154.9	165.9
TELIMELE	2014-05-25	150.0	161.4	155.9	166.9
GUECKEDOU	2014-05-25	150.0	161.4	155.9	166.9
GUECKEDOU	2014-05-25	150.0	161.4	155.9	166.9
TELIMELE	2014-05-25	150.0	161.4	155.9	166.9
KAILAHUN	2014-05-25	150.0	161.4	155.9	166.9
TELIMELE	2014-05-25	150.0	161.4	155.9	166.9
MONTSERRADO	2014-05-25	150.0	161.4	155.9	166.9
KAILAHUN	2014-05-25	150.0	161.4	155.9	166.9
LOFA	2014-05-25	150.0	161.4	155.9	166.9
MACENTA	2014-05-25	150.0	161.4	155.9	166.9
MACENTA	2014-05-25	150.0	161.4	155.9	166.9
TELIMELE	2014-05-25	150.0	161.4	155.9	166.9
GUECKEDOU	2014-05-25	150.0	161.4	155.9	166.9
MACENTA	2014-05-25	150.0	161.4	155.9	166.9
KAILAHUN	2014-05-25	150.0	161.4	155.9	166.9
GUECKEDOU	2014-05-25	150.0	161.4	155.9	166.9
MACENTA	2014-05-26	151.0	162.4	156.9	167.9
BOFFA	2014-05-26	151.0	162.4	156.9	167.9
TELIMELE	2014-05-26	151.0	162.4	156.9	167.9
MACENTA	2014-05-26	151.0	162.4	156.9	167.9
GUECKEDOU	2014-05-26	151.0	162.4	156.9	167.9
WESTERN	2014-05-26	151.0	162.4	156.9	167.9
CONAKRY	2014-05-27	152.0	163.4	157.9	168.9
TELIMELE	2014-05-27	152.0	163.4	157.9	168.9
CONAKRY	2014-05-27	152.0	163.4	157.9	168.9
CONAKRY	2014-05-27	152.0	163.4	157.9	168.9
TELIMELE	2014-05-27	152.0	163.4	157.9	168.9
TELIMELE	2014-05-27	152.0	163.4	157.9	168.9
CONAKRY	2014-05-27	152.0	163.4	157.9	168.9
TELIMELE	2014-05-28	153.0	164.4	158.9	169.9
CONAKRY	2014-05-28	153.0	164.4	158.9	169.9
TELIMELE	2014-05-28	153.0	164.4	158.9	169.9
KAILAHUN	2014-05-28	153.0	164.4	158.9	169.9
BOFFA	2014-05-28	153.0	164.4	158.9	169.9
TELIMELE	2014-05-28	153.0	164.4	158.9	169.9
MONTSERRADO	2014-05-28	153.0	164.4	158.9	169.9
TELIMELE	2014-05-28	153.0	164.4	158.9	169.9
TELIMELE	2014-05-28	153.0	164.4	158.9	169.9
KAMBIA	2014-05-29	154.0	165.4	159.9	170.9
MACENTA	2014-05-29	154.0	165.4	159.9	170.9
MONTSERRADO	2014-05-29	154.0	165.4	159.9	170.9
TELIMELE	2014-05-29	154.0	165.4	159.9	170.9
KAILAHUN	2014-05-30	155.0	166.4	160.9	171.9
CONAKRY	2014-05-30	155.0	166.4	160.9	171.9
KONO	2014-05-30	155.0	166.4	160.9	171.9
KAILAHUN	2014-05-30	155.0	166.4	160.9	171.9
CONAKRY	2014-05-31	156.0	167.4	161.9	172.9
BOFFA	2014-05-31	156.0	167.4	161.9	172.9
GUECKEDOU	2014-06-01	157.0	168.4	162.9	173.9
CONAKRY	2014-06-01	157.0	168.4	162.9	173.9
WESTERN	2014-06-01	157.0	168.4	162.9	173.9
KAILAHUN	2014-06-01	157.0	168.4	162.9	173.9
KAILAHUN	2014-06-01	157.0	168.4	162.9	173.9
DUBREKA	2014-06-01	157.0	168.4	162.9	173.9
PORT_LOKO	2014-06-01	157.0	168.4	162.9	173.9
KENEMA	2014-06-01	157.0	168.4	162.9	173.9
GUECKEDOU	2014-06-02	158.0	169.4	163.9	174.9
CONAKRY	2014-06-02	158.0	169.4	163.9	174.9
KAILAHUN	2014-06-02	158.0	169.4	163.9	174.9
MACENTA	2014-06-02	158.0	169.4	163.9	174.9
KAILAHUN	2014-06-02	158.0	169.4	163.9	174.9
KAILAHUN	2014-06-02	158.0	169.4	163.9	174.9
GUECKEDOU	2014-06-02	158.0	169.4	163.9	174.9
KENEMA	2014-06-02	158.0	169.4	163.9	174.9
TELIMELE	2014-06-02	158.0	169.4	163.9	174.9
KAILAHUN	2014-06-02	158.0	169.4	163.9	174.9
KAILAHUN	2014-06-02	158.0	169.4	163.9	174.9
LOFA	2014-06-02	158.0	169.4	163.9	174.9
KAILAHUN	2014-06-02	158.0	169.4	163.9	174.9
BOFFA	2014-06-03	159.0	170.4	164.9	175.9
GUECKEDOU	2014-06-03	159.0	170.4	164.9	175.9
PORT_LOKO	2014-06-03	159.0	170.4	164.9	175.9
KOUROUSSA	2014-06-03	159.0	170.4	164.9	175.9
GUECKEDOU	2014-06-03	159.0	170.4	164.9	175.9
GUECKEDOU	2014-06-03	159.0	170.4	164.9	175.9
KAILAHUN	2014-06-03	159.0	170.4	164.9	175.9
KAILAHUN	2014-06-03	159.0	170.4	164.9	175.9
GUECKEDOU	2014-06-03	159.0	170.4	164.9	175.9
GUECKEDOU	2014-06-03	159.0	170.4	164.9	175.9
KAILAHUN	2014-06-03	159.0	170.4	164.9	175.9
BOFFA	2014-06-04	160.0	171.4	165.9	176.9
BOFFA	2014-06-04	160.0	171.4	165.9	176.9
LOFA	2014-06-04	160.0	171.4	165.9	176.9
KAILAHUN	2014-06-04	160.0	171.4	165.9	176.9
KAILAHUN	2014-06-04	160.0	171.4	165.9	176.9
KAILAHUN	2014-06-04	160.0	171.4	165.9	176.9
GUECKEDOU	2014-06-04	160.0	171.4	165.9	176.9
KAILAHUN	2014-06-04	160.0	171.4	165.9	176.9
KAILAHUN	2014-06-04	160.0	171.4	165.9	176.9
KAILAHUN	2014-06-04	160.0	171.4	165.9	176.9
KAILAHUN	2014-06-04	160.0	171.4	165.9	176.9
BOFFA	2014-06-04	160.0	171.4	165.9	176.9
KAILAHUN	2014-06-04	160.0	171.4	165.9	176.9
KAILAHUN	2014-06-05	161.0	172.4	166.9	177.9
GUECKEDOU	2014-06-05	161.0	172.4	166.9	177.9
KENEMA	2014-06-05	161.0	172.4	166.9	177.9
GUECKEDOU	2014-06-05	161.0	172.4	166.9	177.9
GUECKEDOU	2014-06-05	161.0	172.4	166.9	177.9
WESTERN	2014-06-05	161.0	172.4	166.9	177.9
KAILAHUN	2014-06-05	161.0	172.4	166.9	177.9
GUECKEDOU	2014-06-05	161.0	172.4	166.9	177.9
BOFFA	2014-06-05	161.0	172.4	166.9	177.9
WESTERN	2014-06-05	161.0	172.4	166.9	177.9
LOFA	2014-06-06	162.0	173.4	167.9	178.9
MONTSERRADO	2014-06-06	162.0	173.4	167.9	178.9
KAILAHUN	2014-06-06	162.0	173.4	167.9	178.9
GUECKEDOU	2014-06-06	162.0	173.4	167.9	178.9
GUECKEDOU	2014-06-06	162.0	173.4	167.9	178.9
PORT_LOKO	2014-06-06	162.0	173.4	167.9	178.9
KAILAHUN	2014-06-06	162.0	173.4	167.9	178.9
BOMBALI	2014-06-06	162.0	173.4	167.9	178.9
LOFA	2014-06-07	163.0	174.4	168.9	179.9
GUECKEDOU	2014-06-07	163.0	174.4	168.9	179.9
KAILAHUN	2014-06-08	164.0	175.4	169.9	180.9
KENEMA	2014-06-08	164.0	175.4	169.9	180.9
KAILAHUN	2014-06-08	164.0	175.4	169.9	180.9
GUECKEDOU	2014-06-08	164.0	175.4	169.9	180.9
LOFA	2014-06-08	164.0	175.4	169.9	180.9
LOFA	2014-06-08	164.0	175.4	169.9	180.9
KAILAHUN	2014-06-08	164.0	175.4	169.9	180.9
GUECKEDOU	2014-06-08	164.0	175.4	169.9	180.9
TELIMELE	2014-06-08	164.0	175.4	169.9	180.9
LOFA	2014-06-08	164.0	175.4	169.9	180.9
KAILAHUN	2014-06-08	164.0	175.4	169.9	180.9
LOFA	2014-06-08	164.0	175.4	169.9	180.9
KAILAHUN	2014-06-08	164.0	175.4	169.9	180.9
LOFA	2014-06-08	164.0	175.4	169.9	180.9
LOFA	2014-06-08	164.0	175.4	169.9	180.9
BOFFA	2014-06-09	165.0	176.4	170.9	181.9
LOFA	2014-06-09	165.0	176.4	170.9	181.9
KAILAHUN	2014-06-09	165.0	176.4	170.9	181.9
GUECKEDOU	2014-06-09	165.0	176.4	170.9	181.9
BOFFA	2014-06-09	165.0	176.4	170.9	181.9
KAILAHUN	2014-06-09	165.0	176.4	170.9	181.9
KAILAHUN	2014-06-09	165.0	176.4	170.9	181.9
LOFA	2014-06-09	165.0	176.4	170.9	181.9
LOFA	2014-06-09	165.0	176.4	170.9	181.9
KAILAHUN	2014-06-09	165.0	176.4	170.9	181.9
MONTSERRADO	2014-06-09	165.0	176.4	170.9	181.9
GUECKEDOU	2014-06-09	165.0	176.4	170.9	181.9
GUECKEDOU	2014-06-09	165.0	176.4	170.9	181.9
LOFA	2014-06-09	165.0	176.4	170.9	181.9
GUECKEDOU	2014-06-09	165.0	176.4	170.9	181.9
KAILAHUN	2014-06-10	166.0	177.4	171.9	182.9
KAILAHUN	2014-06-10	166.0	177.4	171.9	182.9
KAILAHUN	2014-06-10	166.0	177.4	171.9	182.9
KAILAHUN	2014-06-10	166.0	177.4	171.9	182.9
KAILAHUN	2014-06-10	166.0	177.4	171.9	182.9
LOFA	2014-06-10	166.0	177.4	171.9	182.9
MONTSERRADO	2014-06-10	166.0	177.4	171.9	182.9
MONTSERRADO	2014-06-10	166.0	177.4	171.9	182.9
KENEMA	2014-06-10	166.0	177.4	171.9	182.9
KAILAHUN	2014-06-10	166.0	177.4	171.9	182.9
MONTSERRADO	2014-06-10	166.0	177.4	171.9	182.9
KAILAHUN	2014-06-10	166.0	177.4	171.9	182.9
GUECKEDOU	2014-06-10	166.0	177.4	171.9	182.9
KAILAHUN	2014-06-10	166.0	177.4	171.9	182.9
GUECKEDOU	2014-06-10	166.0	177.4	171.9	182.9
WESTERN	2014-06-10	166.0	177.4	171.9	182.9
MONTSERRADO	2014-06-10	166.0	177.4	171.9	182.9
KAILAHUN	2014-06-10	166.0	177.4	171.9	182.9
KAILAHUN	2014-06-10	166.0	177.4	171.9	182.9
KAILAHUN	2014-06-10	166.0	177.4	171.9	182.9
LOFA	2014-06-11	167.0	178.4	172.9	183.9
KAILAHUN	2014-06-11	167.0	178.4	172.9	183.9
LOFA	2014-06-11	167.0	178.4	172.9	183.9
KAILAHUN	2014-06-11	167.0	178.4	172.9	183.9
KAILAHUN	2014-06-11	167.0	178.4	172.9	183.9
KAILAHUN	2014-06-11	167.0	178.4	172.9	183.9
GUECKEDOU	2014-06-11	167.0	178.4	172.9	183.9
KAILAHUN	2014-06-11	167.0	178.4	172.9	183.9
KENEMA	2014-06-11	167.0	178.4	172.9	183.9
KAILAHUN	2014-06-11	167.0	178.4	172.9	183.9
KAILAHUN	2014-06-11	167.0	178.4	172.9	183.9
KAILAHUN	2014-06-11	167.0	178.4	172.9	183.9
GUECKEDOU	2014-06-11	167.0	178.4	172.9	183.9
KAILAHUN	2014-06-11	167.0	178.4	172.9	183.9
KAILAHUN	2014-06-12	168.0	179.4	173.9	184.9
KAILAHUN	2014-06-12	168.0	179.4	173.9	184.9
MONTSERRADO	2014-06-12	168.0	179.4	173.9	184.9
KENEMA	2014-06-12	168.0	179.4	173.9	184.9
KAILAHUN	2014-06-12	168.0	179.4	173.9	184.9
KAILAHUN	2014-06-12	168.0	179.4	173.9	184.9
KAILAHUN	2014-06-12	168.0	179.4	173.9	184.9
KAILAHUN	2014-06-12	168.0	179.4	173.9	184.9
KAILAHUN	2014-06-12	168.0	179.4	173.9	184.9
KAILAHUN	2014-06-12	168.0	179.4	173.9	184.9
KAILAHUN	2014-06-12	168.0	179.4	173.9	184.9
KENEMA	2014-06-12	168.0	179.4	173.9	184.9
KAILAHUN	2014-06-12	168.0	179.4	173.9	184.9
KAILAHUN	2014-06-12	168.0	179.4	173.9	184.9
KAILAHUN	2014-06-12	168.0	179.4	173.9	184.9
KAILAHUN	2014-06-12	168.0	179.4	173.9	184.9
KAILAHUN	2014-06-13	169.0	180.4	174.9	185.9
LOFA	2014-06-13	169.0	180.4	174.9	185.9
BOFFA	2014-06-13	169.0	180.4	174.9	185.9
KAILAHUN	2014-06-13	169.0	180.4	174.9	185.9
LOFA	2014-06-13	169.0	180.4	174.9	185.9
KENEMA	2014-06-13	169.0	180.4	174.9	185.9
KAILAHUN	2014-06-13	169.0	180.4	174.9	185.9
LOFA	2014-06-13	169.0	180.4	174.9	185.9
LOFA	2014-06-13	169.0	180.4	174.9	185.9
KAILAHUN	2014-06-13	169.0	180.4	174.9	185.9
KAILAHUN	2014-06-13	169.0	180.4	174.9	185.9
KENEMA	2014-06-13	169.0	180.4	174.9	185.9
KAILAHUN	2014-06-13	169.0	180.4	174.9	185.9
KAILAHUN	2014-06-14	170.0	181.4	175.9	186.9
KAILAHUN	2014-06-14	170.0	181.4	175.9	186.9
KAILAHUN	2014-06-14	170.0	181.4	175.9	186.9
BOFFA	2014-06-14	170.0	181.4	175.9	186.9
KAILAHUN	2014-06-14	170.0	181.4	175.9	186.9
MONTSERRADO	2014-06-14	170.0	181.4	175.9	186.9
KAILAHUN	2014-06-14	170.0	181.4	175.9	186.9
KAILAHUN	2014-06-14	170.0	181.4	175.9	186.9
LOFA	2014-06-14	170.0	181.4	175.9	186.9
KAILAHUN	2014-06-14	170.0	181.4	175.9	186.9
KENEMA	2014-06-14	170.0	181.4	175.9	186.9
KAILAHUN	2014-06-14	170.0	181.4	175.9	186.9
KAILAHUN	2014-06-14	170.0	181.4	175.9	186.9
KAILAHUN	2014-06-14	170.0	181.4	175.9	186.9
KENEMA	2014-06-14	170.0	181.4	175.9	186.9
WESTERN	2014-06-14	170.0	181.4	175.9	186.9
KAILAHUN	2014-06-14	170.0	181.4	175.9	186.9
LOFA	2014-06-14	170.0	181.4	175.9	186.9
KAILAHUN	2014-06-14	170.0	181.4	175.9	186.9
GUECKEDOU	2014-06-14	170.0	181.4	175.9	186.9
KAILAHUN	2014-06-14	170.0	181.4	175.9	186.9
GUECKEDOU	2014-06-14	170.0	181.4	175.9	186.9
KENEMA	2014-06-14	170.0	181.4	175.9	186.9
KAILAHUN	2014-06-14	170.0	181.4	175.9	186.9
KAILAHUN	2014-06-14	170.0	181.4	175.9	186.9
KAILAHUN	2014-06-14	170.0	181.4	175.9	186.9
KAILAHUN	2014-06-14	170.0	181.4	175.9	186.9
MONTSERRADO	2014-06-14	170.0	181.4	175.9	186.9
KAILAHUN	2014-06-14	170.0	181.4	175.9	186.9
GUECKEDOU	2014-06-14	170.0	181.4	175.9	186.9
KAILAHUN	2014-06-14	170.0	181.4	175.9	186.9
KAILAHUN	2014-06-14	170.0	181.4	175.9	186.9
KAILAHUN	2014-06-14	170.0	181.4	175.9	186.9
KENEMA	2014-06-15	171.0	182.4	176.9	187.9
LOFA	2014-06-15	171.0	182.4	176.9	187.9
LOFA	2014-06-15	171.0	182.4	176.9	187.9
KENEMA	2014-06-15	171.0	182.4	176.9	187.9
LOFA	2014-06-15	171.0	182.4	176.9	187.9
GUECKEDOU	2014-06-15	171.0	182.4	176.9	187.9
LOFA	2014-06-15	171.0	182.4	176.9	187.9
GUECKEDOU	2014-06-15	171.0	182.4	176.9	187.9
LOFA	2014-06-15	171.0	182.4	176.9	187.9
KAILAHUN	2014-06-15	171.0	182.4	176.9	187.9
MONTSERRADO	2014-06-15	171.0	182.4	176.9	187.9
LOFA	2014-06-15	171.0	182.4	176.9	187.9
MONTSERRADO	2014-06-15	171.0	182.4	176.9	187.9
LOFA	2014-06-15	171.0	182.4	176.9	187.9
GUECKEDOU	2014-06-16	172.0	183.4	177.9	188.9
GUECKEDOU	2014-06-16	172.0	183.4	177.9	188.9
LOFA	2014-06-16	172.0	183.4	177.9	188.9
MONTSERRADO	2014-06-16	172.0	183.4	177.9	188.9
KAILAHUN	2014-06-16	172.0	183.4	177.9	188.9
KENEMA	2014-06-16	172.0	183.4	177.9	188.9
PORT_LOKO	2014-06-16	172.0	183.4	177.9	188.9
KENEMA	2014-06-16	172.0	183.4	177.9	188.9
LOFA	2014-06-16	172.0	183.4	177.9	188.9
KAILAHUN	2014-06-16	172.0	183.4	177.9	188.9
GUECKEDOU	2014-06-16	172.0	183.4	177.9	188.9
GUECKEDOU	2014-06-16	172.0	183.4	177.9	188.9
GUECKEDOU	2014-06-16	172.0	183.4	177.9	188.9
KAILAHUN	2014-06-16	172.0	183.4	177.9	188.9
GUECKEDOU	2014-06-16	172.0	183.4	177.9	188.9
LOFA	2014-06-16	172.0	183.4	177.9	188.9
GUECKEDOU	2014-06-16	172.0	183.4	177.9	188.9
KAILAHUN	2014-06-17	173.0	184.4	178.9	189.9
KAILAHUN	2014-06-17	173.0	184.4	178.9	189.9
KAILAHUN	2014-06-17	173.0	184.4	178.9	189.9
GUECKEDOU	2014-06-17	173.0	184.4	178.9	189.9
MONTSERRADO	2014-06-17	173.0	184.4	178.9	189.9
KAILAHUN	2014-06-17	173.0	184.4	178.9	189.9
GUECKEDOU	2014-06-17	173.0	184.4	178.9	189.9
KAILAHUN	2014-06-17	173.0	184.4	178.9	189.9
KAILAHUN	2014-06-17	173.0	184.4	178.9	189.9
KAILAHUN	2014-06-17	173.0	184.4	178.9	189.9
LOFA	2014-06-17	173.0	184.4	178.9	189.9
GUECKEDOU	2014-06-17	173.0	184.4	178.9	189.9
KAILAHUN	2014-06-17	173.0	184.4	178.9	189.9
BOFFA	2014-06-17	173.0	184.4	178.9	189.9
LOFA	2014-06-17	173.0	184.4	178.9	189.9
KAILAHUN	2014-06-17	173.0	184.4	178.9	189.9
KENEMA	2014-06-17	173.0	184.4	178.9	189.9
KAILAHUN	2014-06-17	173.0	184.4	178.9	189.9
KAILAHUN	2014-06-17	173.0	184.4	178.9	189.9
KAILAHUN	2014-06-17	173.0	184.4	178.9	189.9
KAILAHUN	2014-06-17	173.0	184.4	178.9	189.9
KAILAHUN	2014-06-17	173.0	184.4	178.9	189.9
KAILAHUN	2014-06-17	173.0	184.4	178.9	189.9
KAILAHUN	2014-06-17	173.0	184.4	178.9	189.9
KAILAHUN	2014-06-17	173.0	184.4	178.9	189.9
KAILAHUN	2014-06-17	173.0	184.4	178.9	189.9
KAILAHUN	2014-06-17	173.0	184.4	178.9	189.9
LOFA	2014-06-18	174.0	185.4	179.9	190.9
LOFA	2014-06-18	174.0	185.4	179.9	190.9
KENEMA	2014-06-18	174.0	185.4	179.9	190.9
KAILAHUN	2014-06-18	174.0	185.4	179.9	190.9
KAILAHUN	2014-06-18	174.0	185.4	179.9	190.9
KENEMA	2014-06-18	174.0	185.4	179.9	190.9
BOFFA	2014-06-18	174.0	185.4	179.9	190.9
GUECKEDOU	2014-06-18	174.0	185.4	179.9	190.9
KAILAHUN	2014-06-18	174.0	185.4	179.9	190.9
GUECKEDOU	2014-06-18	174.0	185.4	179.9	190.9
MONTSERRADO	2014-06-18	174.0	185.4	179.9	190.9
LOFA	2014-06-18	174.0	185.4	179.9	190.9
CONAKRY	2014-06-18	174.0	185.4	179.9	190.9
KAILAHUN	2014-06-18	174.0	185.4	179.9	190.9
KAILAHUN	2014-06-18	174.0	185.4	179.9	190.9
KAILAHUN	2014-06-18	174.0	185.4	179.9	190.9
LOFA	2014-06-18	174.0	185.4	179.9	190.9
KAILAHUN	2014-06-18	174.0	185.4	179.9	190.9
GUECKEDOU	2014-06-19	175.0	186.4	180.9	191.9
LOFA	2014-06-19	175.0	186.4	180.9	191.9
KAILAHUN	2014-06-19	175.0	186.4	180.9	191.9
GUECKEDOU	2014-06-19	175.0	186.4	180.9	191.9
GUECKEDOU	2014-06-19	175.0	186.4	180.9	191.9
KENEMA	2014-06-19	175.0	186.4	180.9	191.9
MONTSERRADO	2014-06-19	175.0	186.4	180.9	191.9
BOMI	2014-06-19	175.0	186.4	180.9	191.9
KAILAHUN	2014-06-19	175.0	186.4	180.9	191.9
KAILAHUN	2014-06-19	175.0	186.4	180.9	191.9
CONAKRY	2014-06-19	175.0	186.4	180.9	191.9
LOFA	2014-06-19	175.0	186.4	180.9	191.9
LOFA	2014-06-19	175.0	186.4	180.9	191.9
WESTERN	2014-06-19	175.0	186.4	180.9	191.9
GUECKEDOU	2014-06-19	175.0	186.4	180.9	191.9
MONTSERRADO	2014-06-19	175.0	186.4	180.9	191.9
GUECKEDOU	2014-06-19	175.0	186.4	180.9	191.9
KENEMA	2014-06-19	175.0	186.4	180.9	191.9
KENEMA	2014-06-19	175.0	186.4	180.9	191.9
GUECKEDOU	2014-06-19	175.0	186.4	180.9	191.9
LOFA	2014-06-19	175.0	186.4	180.9	191.9
KENEMA	2014-06-19	175.0	186.4	180.9	191.9
BO	2014-06-20	176.0	187.4	181.9	192.9
KENEMA	2014-06-20	176.0	187.4	181.9	192.9
MONTSERRADO	2014-06-20	176.0	187.4	181.9	192.9
KAILAHUN	2014-06-20	176.0	187.4	181.9	192.9
KAILAHUN	2014-06-20	176.0	187.4	181.9	192.9
WESTERN	2014-06-20	176.0	187.4	181.9	192.9
KAILAHUN	2014-06-20	176.0	187.4	181.9	192.9
KAILAHUN	2014-06-20	176.0	187.4	181.9	192.9
KAILAHUN	2014-06-20	176.0	187.4	181.9	192.9
MONTSERRADO	2014-06-20	176.0	187.4	181.9	192.9
KENEMA	2014-06-20	176.0	187.4	181.9	192.9
KAILAHUN	2014-06-20	176.0	187.4	181.9	192.9
GUECKEDOU	2014-06-20	176.0	187.4	181.9	192.9
LOFA	2014-06-20	176.0	187.4	181.9	192.9
KAILAHUN	2014-06-20	176.0	187.4	181.9	192.9
KAILAHUN	2014-06-20	176.0	187.4	181.9	192.9
MONTSERRADO	2014-06-20	176.0	187.4	181.9	192.9
LOFA	2014-06-20	176.0	187.4	181.9	192.9
GUECKEDOU	2014-06-20	176.0	187.4	181.9	192.9
GUECKEDOU	2014-06-20	176.0	187.4	181.9	192.9
KAILAHUN	2014-06-20	176.0	187.4	181.9	192.9
KAILAHUN	2014-06-20	176.0	187.4	181.9	192.9
MONTSERRADO	2014-06-20	176.0	187.4	181.9	192.9
BOFFA	2014-06-21	177.0	188.4	182.9	193.9
MONTSERRADO	2014-06-21	177.0	188.4	182.9	193.9
LOFA	2014-06-21	177.0	188.4	182.9	193.9
LOFA	2014-06-21	177.0	188.4	182.9	193.9
WESTERN	2014-06-21	177.0	188.4	182.9	193.9
KAILAHUN	2014-06-21	177.0	188.4	182.9	193.9
CONAKRY	2014-06-21	177.0	188.4	182.9	193.9
CONAKRY	2014-06-21	177.0	188.4	182.9	193.9
KENEMA	2014-06-21	177.0	188.4	182.9	193.9
WESTERN	2014-06-21	177.0	188.4	182.9	193.9
MONTSERRADO	2014-06-21	177.0	188.4	182.9	193.9
CONAKRY	2014-06-21	177.0	188.4	182.9	193.9
MARGIBI	2014-06-21	177.0	188.4	182.9	193.9
LOFA	2014-06-22	178.0	189.4	183.9	194.9
KENEMA	2014-06-22	178.0	189.4	183.9	194.9
KENEMA	2014-06-22	178.0	189.4	183.9	194.9
KAILAHUN	2014-06-22	178.0	189.4	183.9	194.9
KENEMA	2014-06-22	178.0	189.4	183.9	194.9
KAILAHUN	2014-06-22	178.0	189.4	183.9	194.9
MONTSERRADO	2014-06-22	178.0	189.4	183.9	194.9
BOFFA	2014-06-22	178.0	189.4	183.9	194.9
LOFA	2014-06-23	179.0	190.4	184.9	195.9
GUECKEDOU	2014-06-23	179.0	190.4	184.9	195.9
WESTERN	2014-06-23	179.0	190.4	184.9	195.9
KAILAHUN	2014-06-23	179.0	190.4	184.9	195.9
KAILAHUN	2014-06-23	179.0	190.4	184.9	195.9
LOFA	2014-06-23	179.0	190.4	184.9	195.9
KAILAHUN	2014-06-23	179.0	190.4	184.9	195.9
KAILAHUN	2014-06-23	179.0	190.4	184.9	195.9
KAILAHUN	2014-06-23	179.0	190.4	184.9	195.9
LOFA	2014-06-23	179.0	190.4	184.9	195.9
KENEMA	2014-06-24	180.0	191.4	185.9	196.9
KAILAHUN	2014-06-24	180.0	191.4	185.9	196.9
MONTSERRADO	2014-06-24	180.0	191.4	185.9	196.9
GUECKEDOU	2014-06-24	180.0	191.4	185.9	196.9
KAILAHUN	2014-06-24	180.0	191.4	185.9	196.9
KAILAHUN	2014-06-24	180.0	191.4	185.9	196.9
LOFA	2014-06-24	180.0	191.4	185.9	196.9
KAILAHUN	2014-06-24	180.0	191.4	185.9	196.9
MARGIBI	2014-06-24	180.0	191.4	185.9	196.9
KENEMA	2014-06-24	180.0	191.4	185.9	196.9
MONTSERRADO	2014-06-24	180.0	191.4	185.9	196.9
LOFA	2014-06-25	181.0	192.4	186.9	197.9
KENEMA	2014-06-25	181.0	192.4	186.9	197.9
LOFA	2014-06-25	181.0	192.4	186.9	197.9
MONTSERRADO	2014-06-25	181.0	192.4	186.9	197.9
KENEMA	2014-06-25	181.0	192.4	186.9	197.9
KAILAHUN	2014-06-25	181.0	192.4	186.9	197.9
LOFA	2014-06-25	181.0	192.4	186.9	197.9
KAILAHUN	2014-06-25	181.0	192.4	186.9	197.9
KAILAHUN	2014-06-25	181.0	192.4	186.9	197.9
MONTSERRADO	2014-06-25	181.0	192.4	186.9	197.9
KENEMA	2014-06-25	181.0	192.4	186.9	197.9
BOFFA	2014-06-25	181.0	192.4	186.9	197.9
KAILAHUN	2014-06-25	181.0	192.4	186.9	197.9
KAILAHUN	2014-06-25	181.0	192.4	186.9	197.9
KAILAHUN	2014-06-25	181.0	192.4	186.9	197.9
KAILAHUN	2014-06-25	181.0	192.4	186.9	197.9
KAILAHUN	2014-06-25	181.0	192.4	186.9	197.9
KENEMA	2014-06-26	182.0	193.4	187.9	198.9
KAILAHUN	2014-06-26	182.0	193.4	187.9	198.9
KAILAHUN	2014-06-26	182.0	193.4	187.9	198.9
KENEMA	2014-06-26	182.0	193.4	187.9	198.9
KENEMA	2014-06-26	182.0	193.4	187.9	198.9
KENEMA	2014-06-26	182.0	193.4	187.9	198.9
KAILAHUN	2014-06-26	182.0	193.4	187.9	198.9
GUECKEDOU	2014-06-26	182.0	193.4	187.9	198.9
KAILAHUN	2014-06-26	182.0	193.4	187.9	198.9
KAILAHUN	2014-06-26	182.0	193.4	187.9	198.9
KAILAHUN	2014-06-26	182.0	193.4	187.9	198.9
KENEMA	2014-06-26	182.0	193.4	187.9	198.9
KENEMA	2014-06-27	183.0	194.4	188.9	199.9
KENEMA	2014-06-27	183.0	194.4	188.9	199.9
KENEMA	2014-06-27	183.0	194.4	188.9	199.9
KENEMA	2014-06-27	183.0	194.4	188.9	199.9
GUECKEDOU	2014-06-27	183.0	194.4	188.9	199.9
KENEMA	2014-06-27	183.0	194.4	188.9	199.9
KAILAHUN	2014-06-27	183.0	194.4	188.9	199.9
KAILAHUN	2014-06-27	183.0	194.4	188.9	199.9
KENEMA	2014-06-27	183.0	194.4	188.9	199.9
KAILAHUN	2014-06-27	183.0	194.4	188.9	199.9
KENEMA	2014-06-27	183.0	194.4	188.9	199.9
MONTSERRADO	2014-06-27	183.0	194.4	188.9	199.9
BOMBALI	2014-06-27	183.0	194.4	188.9	199.9
KAILAHUN	2014-06-27	183.0	194.4	188.9	199.9
KAILAHUN	2014-06-28	184.0	195.4	189.9	200.9
MONTSERRADO	2014-06-28	184.0	195.4	189.9	200.9
KENEMA	2014-06-28	184.0	195.4	189.9	200.9
KAILAHUN	2014-06-28	184.0	195.4	189.9	200.9
KAILAHUN	2014-06-28	184.0	195.4	189.9	200.9
KENEMA	2014-06-28	184.0	195.4	189.9	200.9
MONTSERRADO	2014-06-28	184.0	195.4	189.9	200.9
KAILAHUN	2014-06-28	184.0	195.4	189.9	200.9
KENEMA	2014-06-28	184.0	195.4	189.9	200.9
KAILAHUN	2014-06-28	184.0	195.4	189.9	200.9
KENEMA	2014-06-28	184.0	195.4	189.9	200.9
LOFA	2014-06-28	184.0	195.4	189.9	200.9
KAILAHUN	2014-06-28	184.0	195.4	189.9	200.9
KAILAHUN	2014-06-28	184.0	195.4	189.9	200.9
MONTSERRADO	2014-06-28	184.0	195.4	189.9	200.9
KAILAHUN	2014-06-28	184.0	195.4	189.9	200.9
KAILAHUN	2014-06-28	184.0	195.4	189.9	200.9
KAILAHUN	2014-06-28	184.0	195.4	189.9	200.9
KAILAHUN	2014-06-28	184.0	195.4	189.9	200.9
LOFA	2014-06-29	185.0	196.4	190.9	201.9
KAILAHUN	2014-06-29	185.0	196.4	190.9	201.9
KAILAHUN	2014-06-29	185.0	196.4	190.9	201.9
KENEMA	2014-06-29	185.0	196.4	190.9	201.9
KENEMA	2014-06-29	185.0	196.4	190.9	201.9
KAILAHUN	2014-06-29	185.0	196.4	190.9	201.9
KENEMA	2014-06-29	185.0	196.4	190.9	201.9
KENEMA	2014-06-29	185.0	196.4	190.9	201.9
KENEMA	2014-06-29	185.0	196.4	190.9	201.9
NIMBA	2014-06-29	185.0	196.4	190.9	201.9
MONTSERRADO	2014-06-29	185.0	196.4	190.9	201.9
MARGIBI	2014-06-30	186.0	197.4	191.9	202.9
KAILAHUN	2014-06-30	186.0	197.4	191.9	202.9
KAILAHUN	2014-06-30	186.0	197.4	191.9	202.9
MONTSERRADO	2014-06-30	186.0	197.4	191.9	202.9
KAILAHUN	2014-06-30	186.0	197.4	191.9	202.9
LOFA	2014-06-30	186.0	197.4	191.9	202.9
KAILAHUN	2014-06-30	186.0	197.4	191.9	202.9
LOFA	2014-06-30	186.0	197.4	191.9	202.9
KENEMA	2014-06-30	186.0	197.4	191.9	202.9
KENEMA	2014-06-30	186.0	197.4	191.9	202.9
KAILAHUN	2014-06-30	186.0	197.4	191.9	202.9
KAILAHUN	2014-06-30	186.0	197.4	191.9	202.9
MONTSERRADO	2014-06-30	186.0	197.4	191.9	202.9
KAILAHUN	2014-06-30	186.0	197.4	191.9	202.9
KAILAHUN	2014-06-30	186.0	197.4	191.9	202.9
KAILAHUN	2014-06-30	186.0	197.4	191.9	202.9
KENEMA	2014-06-30	186.0	197.4	191.9	202.9
KENEMA	2014-06-30	186.0	197.4	191.9	202.9
KAILAHUN	2014-06-30	186.0	197.4	191.9	202.9
KENEMA	2014-06-30	186.0	197.4	191.9	202.9
LOFA	2014-06-30	186.0	197.4	191.9	202.9
MONTSERRADO	2014-06-30	186.0	197.4	191.9	202.9
KAILAHUN	2014-06-30	186.0	197.4	191.9	202.9
KAILAHUN	2014-06-30	186.0	197.4	191.9	202.9
KENEMA	2014-06-30	186.0	197.4	191.9	202.9
MONTSERRADO	2014-07-01	187.0	198.4	192.9	203.9
KAILAHUN	2014-07-01	187.0	198.4	192.9	203.9
GUECKEDOU	2014-07-01	187.0	198.4	192.9	203.9
MONTSERRADO	2014-07-01	187.0	198.4	192.9	203.9
KAILAHUN	2014-07-01	187.0	198.4	192.9	203.9
KAILAHUN	2014-07-01	187.0	198.4	192.9	203.9
KAILAHUN	2014-07-01	187.0	198.4	192.9	203.9
KAILAHUN	2014-07-01	187.0	198.4	192.9	203.9
MONTSERRADO	2014-07-01	187.0	198.4	192.9	203.9
KAILAHUN	2014-07-01	187.0	198.4	192.9	203.9
LOFA	2014-07-01	187.0	198.4	192.9	203.9
KENEMA	2014-07-01	187.0	198.4	192.9	203.9
LOFA	2014-07-01	187.0	198.4	192.9	203.9
KAILAHUN	2014-07-01	187.0	198.4	192.9	203.9
KAILAHUN	2014-07-01	187.0	198.4	192.9	203.9
KENEMA	2014-07-01	187.0	198.4	192.9	203.9
KAILAHUN	2014-07-01	187.0	198.4	192.9	203.9
KAILAHUN	2014-07-01	187.0	198.4	192.9	203.9
KAILAHUN	2014-07-01	187.0	198.4	192.9	203.9
KAILAHUN	2014-07-01	187.0	198.4	192.9	203.9
KAILAHUN	2014-07-01	187.0	198.4	192.9	203.9
MONTSERRADO	2014-07-01	187.0	198.4	192.9	203.9
NIMBA	2014-07-01	187.0	198.4	192.9	203.9
KAILAHUN	2014-07-01	187.0	198.4	192.9	203.9
KAILAHUN	2014-07-01	187.0	198.4	192.9	203.9
KENEMA	2014-07-01	187.0	198.4	192.9	203.9
MONTSERRADO	2014-07-01	187.0	198.4	192.9	203.9
KAILAHUN	2014-07-01	187.0	198.4	192.9	203.9
KAILAHUN	2014-07-01	187.0	198.4	192.9	203.9
BONG	2014-07-01	187.0	198.4	192.9	203.9
KAILAHUN	2014-07-01	187.0	198.4	192.9	203.9
KAILAHUN	2014-07-02	188.0	199.4	193.9	204.9
KENEMA	2014-07-02	188.0	199.4	193.9	204.9
KAILAHUN	2014-07-02	188.0	199.4	193.9	204.9
MONTSERRADO	2014-07-02	188.0	199.4	193.9	204.9
KAILAHUN	2014-07-02	188.0	199.4	193.9	204.9
MONTSERRADO	2014-07-02	188.0	199.4	193.9	204.9
KENEMA	2014-07-02	188.0	199.4	193.9	204.9
PORT_LOKO	2014-07-02	188.0	199.4	193.9	204.9
KENEMA	2014-07-02	188.0	199.4	193.9	204.9
MONTSERRADO	2014-07-02	188.0	199.4	193.9	204.9
KAILAHUN	2014-07-02	188.0	199.4	193.9	204.9
KENEMA	2014-07-02	188.0	199.4	193.9	204.9
MONTSERRADO	2014-07-02	188.0	199.4	193.9	204.9
KENEMA	2014-07-02	188.0	199.4	193.9	204.9
GUECKEDOU	2014-07-02	188.0	199.4	193.9	204.9
KENEMA	2014-07-02	188.0	199.4	193.9	204.9
KAILAHUN	2014-07-02	188.0	199.4	193.9	204.9
BO	2014-07-02	188.0	199.4	193.9	204.9
KENEMA	2014-07-02	188.0	199.4	193.9	204.9
GUECKEDOU	2014-07-02	188.0	199.4	193.9	204.9
WESTERN	2014-07-02	188.0	199.4	193.9	204.9
KAILAHUN	2014-07-02	188.0	199.4	193.9	204.9
MONTSERRADO	2014-07-02	188.0	199.4	193.9	204.9
GRAND_BASSA	2014-07-02	188.0	199.4	193.9	204.9
KAILAHUN	2014-07-02	188.0	199.4	193.9	204.9
KAILAHUN	2014-07-03	189.0	200.4	194.9	205.9
KENEMA	2014-07-03	189.0	200.4	194.9	205.9
MONTSERRADO	2014-07-03	189.0	200.4	194.9	205.9
KAILAHUN	2014-07-03	189.0	200.4	194.9	205.9
KAILAHUN	2014-07-03	189.0	200.4	194.9	205.9
KENEMA	2014-07-03	189.0	200.4	194.9	205.9
KENEMA	2014-07-03	189.0	200.4	194.9	205.9
KAILAHUN	2014-07-03	189.0	200.4	194.9	205.9
MONTSERRADO	2014-07-04	190.0	201.4	195.9	206.9
KAILAHUN	2014-07-04	190.0	201.4	195.9	206.9
BO	2014-07-04	190.0	201.4	195.9	206.9
KAILAHUN	2014-07-04	190.0	201.4	195.9	206.9
GUECKEDOU	2014-07-04	190.0	201.4	195.9	206.9
LOFA	2014-07-04	190.0	201.4	195.9	206.9
MONTSERRADO	2014-07-04	190.0	201.4	195.9	206.9
LOFA	2014-07-04	190.0	201.4	195.9	206.9
KAILAHUN	2014-07-04	190.0	201.4	195.9	206.9
GUECKEDOU	2014-07-04	190.0	201.4	195.9	206.9
KAILAHUN	2014-07-04	190.0	201.4	195.9	206.9
LOFA	2014-07-04	190.0	201.4	195.9	206.9
NIMBA	2014-07-04	190.0	201.4	195.9	206.9
KENEMA	2014-07-04	190.0	201.4	195.9	206.9
KENEMA	2014-07-04	190.0	201.4	195.9	206.9
LOFA	2014-07-04	190.0	201.4	195.9	206.9
LOFA	2014-07-04	190.0	201.4	195.9	206.9
KAILAHUN	2014-07-04	190.0	201.4	195.9	206.9
KAILAHUN	2014-07-04	190.0	201.4	195.9	206.9
BO	2014-07-04	190.0	201.4	195.9	206.9
KAILAHUN	2014-07-04	190.0	201.4	195.9	206.9
KAILAHUN	2014-07-05	191.0	202.4	196.9	207.9
BO	2014-07-05	191.0	202.4	196.9	207.9
KAILAHUN	2014-07-05	191.0	202.4	196.9	207.9
KAILAHUN	2014-07-05	191.0	202.4	196.9	207.9
MONTSERRADO	2014-07-05	191.0	202.4	196.9	207.9
KAILAHUN	2014-07-05	191.0	202.4	196.9	207.9
KAILAHUN	2014-07-05	191.0	202.4	196.9	207.9
KAILAHUN	2014-07-05	191.0	202.4	196.9	207.9
KAILAHUN	2014-07-05	191.0	202.4	196.9	207.9
BONG	2014-07-05	191.0	202.4	196.9	207.9
KENEMA	2014-07-05	191.0	202.4	196.9	207.9
KAILAHUN	2014-07-05	191.0	202.4	196.9	207.9
KENEMA	2014-07-05	191.0	202.4	196.9	207.9
KENEMA	2014-07-05	191.0	202.4	196.9	207.9
KENEMA	2014-07-05	191.0	202.4	196.9	207.9
KAILAHUN	2014-07-05	191.0	202.4	196.9	207.9
LOFA	2014-07-05	191.0	202.4	196.9	207.9
MONTSERRADO	2014-07-05	191.0	202.4	196.9	207.9
LOFA	2014-07-05	191.0	202.4	196.9	207.9
KAILAHUN	2014-07-06	192.0	203.4	197.9	208.9
LOFA	2014-07-06	192.0	203.4	197.9	208.9
KAILAHUN	2014-07-06	192.0	203.4	197.9	208.9
PORT_LOKO	2014-07-06	192.0	203.4	197.9	208.9
KAILAHUN	2014-07-06	192.0	203.4	197.9	208.9
KAILAHUN	2014-07-06	192.0	203.4	197.9	208.9
LOFA	2014-07-06	192.0	203.4	197.9	208.9
LOFA	2014-07-06	192.0	203.4	197.9	208.9
LOFA	2014-07-06	192.0	203.4	197.9	208.9
LOFA	2014-07-06	192.0	203.4	197.9	208.9
LOFA	2014-07-06	192.0	203.4	197.9	208.9
GUECKEDOU	2014-07-06	192.0	203.4	197.9	208.9
KAILAHUN	2014-07-06	192.0	203.4	197.9	208.9
KAILAHUN	2014-07-06	192.0	203.4	197.9	208.9
WESTERN	2014-07-06	192.0	203.4	197.9	208.9
KAILAHUN	2014-07-06	192.0	203.4	197.9	208.9
KAILAHUN	2014-07-06	192.0	203.4	197.9	208.9
LOFA	2014-07-06	192.0	203.4	197.9	208.9
LOFA	2014-07-06	192.0	203.4	197.9	208.9
KENEMA	2014-07-06	192.0	203.4	197.9	208.9
LOFA	2014-07-06	192.0	203.4	197.9	208.9
KAILAHUN	2014-07-07	193.0	204.4	198.9	209.9
GRAND_BASSA	2014-07-07	193.0	204.4	198.9	209.9
KAILAHUN	2014-07-07	193.0	204.4	198.9	209.9
KAILAHUN	2014-07-07	193.0	204.4	198.9	209.9
KAILAHUN	2014-07-07	193.0	204.4	198.9	209.9
MONTSERRADO	2014-07-07	193.0	204.4	198.9	209.9
KENEMA	2014-07-07	193.0	204.4	198.9	209.9
LOFA	2014-07-07	193.0	204.4	198.9	209.9
KAILAHUN	2014-07-07	193.0	204.4	198.9	209.9
WESTERN	2014-07-07	193.0	204.4	198.9	209.9
MONTSERRADO	2014-07-07	193.0	204.4	198.9	209.9
LOFA	2014-07-07	193.0	204.4	198.9	209.9
MONTSERRADO	2014-07-07	193.0	204.4	198.9	209.9
KAILAHUN	2014-07-07	193.0	204.4	198.9	209.9
KAILAHUN	2014-07-07	193.0	204.4	198.9	209.9
KONO	2014-07-07	193.0	204.4	198.9	209.9
KAILAHUN	2014-07-07	193.0	204.4	198.9	209.9
KENEMA	2014-07-07	193.0	204.4	198.9	209.9
KAILAHUN	2014-07-07	193.0	204.4	198.9	209.9
WESTERN	2014-07-07	193.0	204.4	198.9	209.9
MONTSERRADO	2014-07-07	193.0	204.4	198.9	209.9
BO	2014-07-07	193.0	204.4	198.9	209.9
KAILAHUN	2014-07-07	193.0	204.4	198.9	209.9
LOFA	2014-07-07	193.0	204.4	198.9	209.9
MONTSERRADO	2014-07-07	193.0	204.4	198.9	209.9
WESTERN	2014-07-07	193.0	204.4	198.9	209.9
LOFA	2014-07-07	193.0	204.4	198.9	209.9
LOFA	2014-07-07	193.0	204.4	198.9	209.9
NIMBA	2014-07-07	193.0	204.4	198.9	209.9
MONTSERRADO	2014-07-07	193.0	204.4	198.9	209.9
KENEMA	2014-07-07	193.0	204.4	198.9	209.9
BOMI	2014-07-08	194.0	205.4	199.9	210.9
KAILAHUN	2014-07-08	194.0	205.4	199.9	210.9
LOFA	2014-07-08	194.0	205.4	199.9	210.9
RIVERCESS	2014-07-08	194.0	205.4	199.9	210.9
WESTERN	2014-07-08	194.0	205.4	199.9	210.9
BOMBALI	2014-07-08	194.0	205.4	199.9	210.9
LOFA	2014-07-08	194.0	205.4	199.9	210.9
BONG	2014-07-08	194.0	205.4	199.9	210.9
KAILAHUN	2014-07-08	194.0	205.4	199.9	210.9
LOFA	2014-07-08	194.0	205.4	199.9	210.9
KENEMA	2014-07-08	194.0	205.4	199.9	210.9
MONTSERRADO	2014-07-08	194.0	205.4	199.9	210.9
WESTERN	2014-07-08	194.0	205.4	199.9	210.9
KAILAHUN	2014-07-08	194.0	205.4	199.9	210.9
KAILAHUN	2014-07-08	194.0	205.4	199.9	210.9
KAILAHUN	2014-07-08	194.0	205.4	199.9	210.9
KAILAHUN	2014-07-08	194.0	205.4	199.9	210.9
WESTERN	2014-07-08	194.0	205.4	199.9	210.9
BO	2014-07-08	194.0	205.4	199.9	210.9
KAILAHUN	2014-07-08	194.0	205.4	199.9	210.9
KAILAHUN	2014-07-08	194.0	205.4	199.9	210.9
KAILAHUN	2014-07-08	194.0	205.4	199.9	210.9
KAILAHUN	2014-07-08	194.0	205.4	199.9	210.9
KAILAHUN	2014-07-08	194.0	205.4	199.9	210.9
KAILAHUN	2014-07-09	195.0	206.4	200.9	211.9
KAILAHUN	2014-07-09	195.0	206.4	200.9	211.9
MONTSERRADO	2014-07-09	195.0	206.4	200.9	211.9
MONTSERRADO	2014-07-09	195.0	206.4	200.9	211.9
LOFA	2014-07-09	195.0	206.4	200.9	211.9
KAILAHUN	2014-07-09	195.0	206.4	200.9	211.9
KAILAHUN	2014-07-09	195.0	206.4	200.9	211.9
KAILAHUN	2014-07-09	195.0	206.4	200.9	211.9
LOFA	2014-07-09	195.0	206.4	200.9	211.9
KAILAHUN	2014-07-09	195.0	206.4	200.9	211.9
MONTSERRADO	2014-07-09	195.0	206.4	200.9	211.9
KENEMA	2014-07-09	195.0	206.4	200.9	211.9
KAILAHUN	2014-07-09	195.0	206.4	200.9	211.9
KAILAHUN	2014-07-09	195.0	206.4	200.9	211.9
KENEMA	2014-07-09	195.0	206.4	200.9	211.9
LOFA	2014-07-09	195.0	206.4	200.9	211.9
MONTSERRADO	2014-07-09	195.0	206.4	200.9	211.9
MONTSERRADO	2014-07-09	195.0	206.4	200.9	211.9
KAILAHUN	2014-07-10	196.0	207.4	201.9	212.9
MONTSERRADO	2014-07-10	196.0	207.4	201.9	212.9
KENEMA	2014-07-10	196.0	207.4	201.9	212.9
GUECKEDOU	2014-07-10	196.0	207.4	201.9	212.9
MONTSERRADO	2014-07-10	196.0	207.4	201.9	212.9
KAILAHUN	2014-07-10	196.0	207.4	201.9	212.9
BOMI	2014-07-10	196.0	207.4	201.9	212.9
KAILAHUN	2014-07-10	196.0	207.4	201.9	212.9
NIMBA	2014-07-10	196.0	207.4	201.9	212.9
MONTSERRADO	2014-07-10	196.0	207.4	201.9	212.9
LOFA	2014-07-10	196.0	207.4	201.9	212.9
KAILAHUN	2014-07-10	196.0	207.4	201.9	212.9
KENEMA	2014-07-10	196.0	207.4	201.9	212.9
KAILAHUN	2014-07-10	196.0	207.4	201.9	212.9
MONTSERRADO	2014-07-10	196.0	207.4	201.9	212.9
MONTSERRADO	2014-07-10	196.0	207.4	201.9	212.9
KENEMA	2014-07-10	196.0	207.4	201.9	212.9
LOFA	2014-07-10	196.0	207.4	201.9	212.9
KENEMA	2014-07-10	196.0	207.4	201.9	212.9
SIGUIRI	2014-07-10	196.0	207.4	201.9	212.9
MONTSERRADO	2014-07-10	196.0	207.4	201.9	212.9
KAILAHUN	2014-07-10	196.0	207.4	201.9	212.9
KAILAHUN	2014-07-10	196.0	207.4	201.9	212.9
KENEMA	2014-07-10	196.0	207.4	201.9	212.9
LOFA	2014-07-10	196.0	207.4	201.9	212.9
LOFA	2014-07-10	196.0	207.4	201.9	212.9
KAILAHUN	2014-07-10	196.0	207.4	201.9	212.9
BO	2014-07-10	196.0	207.4	201.9	212.9
MONTSERRADO	2014-07-10	196.0	207.4	201.9	212.9
LOFA	2014-07-10	196.0	207.4	201.9	212.9
WESTERN	2014-07-10	196.0	207.4	201.9	212.9
MONTSERRADO	2014-07-10	196.0	207.4	201.9	212.9
BOMI	2014-07-10	196.0	207.4	201.9	212.9
KENEMA	2014-07-10	196.0	207.4	201.9	212.9
MONTSERRADO	2014-07-10	196.0	207.4	201.9	212.9
KENEMA	2014-07-10	196.0	207.4	201.9	212.9
MONTSERRADO	2014-07-10	196.0	207.4	201.9	212.9
WESTERN	2014-07-10	196.0	207.4	201.9	212.9
KENEMA	2014-07-10	196.0	207.4	201.9	212.9
BONG	2014-07-11	197.0	208.4	202.9	213.9
MONTSERRADO	2014-07-11	197.0	208.4	202.9	213.9
KAILAHUN	2014-07-11	197.0	208.4	202.9	213.9
KAILAHUN	2014-07-11	197.0	208.4	202.9	213.9
KAILAHUN	2014-07-11	197.0	208.4	202.9	213.9
LOFA	2014-07-11	197.0	208.4	202.9	213.9
KAILAHUN	2014-07-11	197.0	208.4	202.9	213.9
KAILAHUN	2014-07-11	197.0	208.4	202.9	213.9
KAILAHUN	2014-07-11	197.0	208.4	202.9	213.9
KAILAHUN	2014-07-11	197.0	208.4	202.9	213.9
KAILAHUN	2014-07-11	197.0	208.4	202.9	213.9
KAILAHUN	2014-07-11	197.0	208.4	202.9	213.9
KENEMA	2014-07-11	197.0	208.4	202.9	213.9
KAILAHUN	2014-07-11	197.0	208.4	202.9	213.9
LOFA	2014-07-11	197.0	208.4	202.9	213.9
MONTSERRADO	2014-07-11	197.0	208.4	202.9	213.9
MONTSERRADO	2014-07-11	197.0	208.4	202.9	213.9
LOFA	2014-07-11	197.0	208.4	202.9	213.9
BONG	2014-07-11	197.0	208.4	202.9	213.9
BONG	2014-07-11	197.0	208.4	202.9	213.9
KAILAHUN	2014-07-11	197.0	208.4	202.9	213.9
KAILAHUN	2014-07-11	197.0	208.4	202.9	213.9
MONTSERRADO	2014-07-11	197.0	208.4	202.9	213.9
MONTSERRADO	2014-07-11	197.0	208.4	202.9	213.9
KAILAHUN	2014-07-11	197.0	208.4	202.9	213.9
BONG	2014-07-12	198.0	209.4	203.9	214.9
KAILAHUN	2014-07-12	198.0	209.4	203.9	214.9
BONG	2014-07-12	198.0	209.4	203.9	214.9
CONAKRY	2014-07-12	198.0	209.4	203.9	214.9
MONTSERRADO	2014-07-12	198.0	209.4	203.9	214.9
KAILAHUN	2014-07-12	198.0	209.4	203.9	214.9
KENEMA	2014-07-12	198.0	209.4	203.9	214.9
KAILAHUN	2014-07-12	198.0	209.4	203.9	214.9
KAILAHUN	2014-07-12	198.0	209.4	203.9	214.9
BONG	2014-07-12	198.0	209.4	203.9	214.9
KENEMA	2014-07-12	198.0	209.4	203.9	214.9
KAILAHUN	2014-07-12	198.0	209.4	203.9	214.9
BOMI	2014-07-12	198.0	209.4	203.9	214.9
KENEMA	2014-07-12	198.0	209.4	203.9	214.9
BOMI	2014-07-12	198.0	209.4	203.9	214.9
KAILAHUN	2014-07-12	198.0	209.4	203.9	214.9
MONTSERRADO	2014-07-12	198.0	209.4	203.9	214.9
KENEMA	2014-07-12	198.0	209.4	203.9	214.9
MONTSERRADO	2014-07-12	198.0	209.4	203.9	214.9
WESTERN	2014-07-12	198.0	209.4	203.9	214.9
KAILAHUN	2014-07-12	198.0	209.4	203.9	214.9
KAILAHUN	2014-07-12	198.0	209.4	203.9	214.9
LOFA	2014-07-13	199.0	210.4	204.9	215.9
WESTERN	2014-07-13	199.0	210.4	204.9	215.9
GRAND_BASSA	2014-07-13	199.0	210.4	204.9	215.9
MONTSERRADO	2014-07-13	199.0	210.4	204.9	215.9
KENEMA	2014-07-13	199.0	210.4	204.9	215.9
MONTSERRADO	2014-07-13	199.0	210.4	204.9	215.9
KENEMA	2014-07-13	199.0	210.4	204.9	215.9
KENEMA	2014-07-13	199.0	210.4	204.9	215.9
KAILAHUN	2014-07-13	199.0	210.4	204.9	215.9
KAILAHUN	2014-07-13	199.0	210.4	204.9	215.9
MONTSERRADO	2014-07-13	199.0	210.4	204.9	215.9
KENEMA	2014-07-13	199.0	210.4	204.9	215.9
KENEMA	2014-07-13	199.0	210.4	204.9	215.9
LOFA	2014-07-13	199.0	210.4	204.9	215.9
KAILAHUN	2014-07-13	199.0	210.4	204.9	215.9
RIVERCESS	2014-07-13	199.0	210.4	204.9	215.9
MONTSERRADO	2014-07-13	199.0	210.4	204.9	215.9
KENEMA	2014-07-13	199.0	210.4	204.9	215.9
KAILAHUN	2014-07-13	199.0	210.4	204.9	215.9
LOFA	2014-07-13	199.0	210.4	204.9	215.9
GUECKEDOU	2014-07-13	199.0	210.4	204.9	215.9
KAILAHUN	2014-07-14	200.0	211.4	205.9	216.9
LOFA	2014-07-14	200.0	211.4	205.9	216.9
MONTSERRADO	2014-07-14	200.0	211.4	205.9	216.9
MARGIBI	2014-07-14	200.0	211.4	205.9	216.9
KAILAHUN	2014-07-14	200.0	211.4	205.9	216.9
BO	2014-07-14	200.0	211.4	205.9	216.9
KENEMA	2014-07-14	200.0	211.4	205.9	216.9
MARGIBI	2014-07-14	200.0	211.4	205.9	216.9
BONG	2014-07-14	200.0	211.4	205.9	216.9
KAILAHUN	2014-07-14	200.0	211.4	205.9	216.9
KENEMA	2014-07-14	200.0	211.4	205.9	216.9
KAILAHUN	2014-07-14	200.0	211.4	205.9	216.9
MARGIBI	2014-07-14	200.0	211.4	205.9	216.9
KENEMA	2014-07-14	200.0	211.4	205.9	216.9
KENEMA	2014-07-14	200.0	211.4	205.9	216.9
MARGIBI	2014-07-14	200.0	211.4	205.9	216.9
MARGIBI	2014-07-14	200.0	211.4	205.9	216.9
KAILAHUN	2014-07-14	200.0	211.4	205.9	216.9
KENEMA	2014-07-14	200.0	211.4	205.9	216.9
LOFA	2014-07-14	200.0	211.4	205.9	216.9
KENEMA	2014-07-14	200.0	211.4	205.9	216.9
KAILAHUN	2014-07-14	200.0	211.4	205.9	216.9
MARGIBI	2014-07-14	200.0	211.4	205.9	216.9
MONTSERRADO	2014-07-15	201.0	212.4	206.9	217.9
MARGIBI	2014-07-15	201.0	212.4	206.9	217.9
KONO	2014-07-15	201.0	212.4	206.9	217.9
PITA	2014-07-15	201.0	212.4	206.9	217.9
MARGIBI	2014-07-15	201.0	212.4	206.9	217.9
KAILAHUN	2014-07-15	201.0	212.4	206.9	217.9
MONTSERRADO	2014-07-15	201.0	212.4	206.9	217.9
MARGIBI	2014-07-15	201.0	212.4	206.9	217.9
KENEMA	2014-07-15	201.0	212.4	206.9	217.9
KENEMA	2014-07-15	201.0	212.4	206.9	217.9
BO	2014-07-15	201.0	212.4	206.9	217.9
KAILAHUN	2014-07-15	201.0	212.4	206.9	217.9
KAILAHUN	2014-07-15	201.0	212.4	206.9	217.9
KAILAHUN	2014-07-15	201.0	212.4	206.9	217.9
TONKOLILI	2014-07-15	201.0	212.4	206.9	217.9
MONTSERRADO	2014-07-15	201.0	212.4	206.9	217.9
MONTSERRADO	2014-07-15	201.0	212.4	206.9	217.9
KAILAHUN	2014-07-15	201.0	212.4	206.9	217.9
KAILAHUN	2014-07-15	201.0	212.4	206.9	217.9
MONTSERRADO	2014-07-15	201.0	212.4	206.9	217.9
KAILAHUN	2014-07-15	201.0	212.4	206.9	217.9
MARGIBI	2014-07-15	201.0	212.4	206.9	217.9
MONTSERRADO	2014-07-15	201.0	212.4	206.9	217.9
MONTSERRADO	2014-07-15	201.0	212.4	206.9	217.9
KAILAHUN	2014-07-15	201.0	212.4	206.9	217.9
MARGIBI	2014-07-15	201.0	212.4	206.9	217.9
BOMI	2014-07-15	201.0	212.4	206.9	217.9
MARGIBI	2014-07-15	201.0	212.4	206.9	217.9
MONTSERRADO	2014-07-15	201.0	212.4	206.9	217.9
KAILAHUN	2014-07-15	201.0	212.4	206.9	217.9
KAILAHUN	2014-07-15	201.0	212.4	206.9	217.9
GRAND_CAPE_MOUNT	2014-07-16	202.0	213.4	207.9	218.9
MONTSERRADO	2014-07-16	202.0	213.4	207.9	218.9
MONTSERRADO	2014-07-16	202.0	213.4	207.9	218.9
MONTSERRADO	2014-07-16	202.0	213.4	207.9	218.9
BOMI	2014-07-16	202.0	213.4	207.9	218.9
BOMI	2014-07-16	202.0	213.4	207.9	218.9
KAILAHUN	2014-07-16	202.0	213.4	207.9	218.9
KENEMA	2014-07-16	202.0	213.4	207.9	218.9
KENEMA	2014-07-16	202.0	213.4	207.9	218.9
MONTSERRADO	2014-07-16	202.0	213.4	207.9	218.9
KENEMA	2014-07-16	202.0	213.4	207.9	218.9
MONTSERRADO	2014-07-16	202.0	213.4	207.9	218.9
BOMI	2014-07-16	202.0	213.4	207.9	218.9
KAILAHUN	2014-07-16	202.0	213.4	207.9	218.9
KAILAHUN	2014-07-16	202.0	213.4	207.9	218.9
MONTSERRADO	2014-07-16	202.0	213.4	207.9	218.9
KENEMA	2014-07-16	202.0	213.4	207.9	218.9
GRAND_CAPE_MOUNT	2014-07-16	202.0	213.4	207.9	218.9
KENEMA	2014-07-16	202.0	213.4	207.9	218.9
CONAKRY	2014-07-16	202.0	213.4	207.9	218.9
MONTSERRADO	2014-07-16	202.0	213.4	207.9	218.9
GRAND_BASSA	2014-07-16	202.0	213.4	207.9	218.9
LOFA	2014-07-16	202.0	213.4	207.9	218.9
PORT_LOKO	2014-07-16	202.0	213.4	207.9	218.9
KAILAHUN	2014-07-16	202.0	213.4	207.9	218.9
KAILAHUN	2014-07-16	202.0	213.4	207.9	218.9
MONTSERRADO	2014-07-16	202.0	213.4	207.9	218.9
KENEMA	2014-07-16	202.0	213.4	207.9	218.9
CONAKRY	2014-07-17	203.0	214.4	208.9	219.9
KAILAHUN	2014-07-17	203.0	214.4	208.9	219.9
MONTSERRADO	2014-07-17	203.0	214.4	208.9	219.9
BOMBALI	2014-07-17	203.0	214.4	208.9	219.9
WESTERN	2014-07-17	203.0	214.4	208.9	219.9
MONTSERRADO	2014-07-17	203.0	214.4	208.9	219.9
BOMI	2014-07-17	203.0	214.4	208.9	219.9
MONTSERRADO	2014-07-17	203.0	214.4	208.9	219.9
MONTSERRADO	2014-07-17	203.0	214.4	208.9	219.9
BO	2014-07-17	203.0	214.4	208.9	219.9
MONTSERRADO	2014-07-17	203.0	214.4	208.9	219.9
KAILAHUN	2014-07-17	203.0	214.4	208.9	219.9
GUECKEDOU	2014-07-17	203.0	214.4	208.9	219.9
MONTSERRADO	2014-07-17	203.0	214.4	208.9	219.9
BOMI	2014-07-17	203.0	214.4	208.9	219.9
CONAKRY	2014-07-17	203.0	214.4	208.9	219.9
GRAND_BASSA	2014-07-17	203.0	214.4	208.9	219.9
WESTERN	2014-07-17	203.0	214.4	208.9	219.9
KAILAHUN	2014-07-17	203.0	214.4	208.9	219.9
BO	2014-07-17	203.0	214.4	208.9	219.9
KAILAHUN	2014-07-17	203.0	214.4	208.9	219.9
CONAKRY	2014-07-17	203.0	214.4	208.9	219.9
BONTHE	2014-07-17	203.0	214.4	208.9	219.9
KENEMA	2014-07-17	203.0	214.4	208.9	219.9
KENEMA	2014-07-17	203.0	214.4	208.9	219.9
BONG	2014-07-17	203.0	214.4	208.9	219.9
MONTSERRADO	2014-07-18	204.0	215.4	209.9	220.9
KENEMA	2014-07-18	204.0	215.4	209.9	220.9
GUECKEDOU	2014-07-18	204.0	215.4	209.9	220.9
MOYAMBA	2014-07-18	204.0	215.4	209.9	220.9
MONTSERRADO	2014-07-18	204.0	215.4	209.9	220.9
CONAKRY	2014-07-18	204.0	215.4	209.9	220.9
WESTERN	2014-07-18	204.0	215.4	209.9	220.9
KAILAHUN	2014-07-18	204.0	215.4	209.9	220.9
KAILAHUN	2014-07-18	204.0	215.4	209.9	220.9
CONAKRY	2014-07-18	204.0	215.4	209.9	220.9
BONG	2014-07-18	204.0	215.4	209.9	220.9
KAILAHUN	2014-07-18	204.0	215.4	209.9	220.9
GUECKEDOU	2014-07-18	204.0	215.4	209.9	220.9
KENEMA	2014-07-18	204.0	215.4	209.9	220.9
MARGIBI	2014-07-18	204.0	215.4	209.9	220.9
CONAKRY	2014-07-18	204.0	215.4	209.9	220.9
MONTSERRADO	2014-07-18	204.0	215.4	209.9	220.9
MONTSERRADO	2014-07-18	204.0	215.4	209.9	220.9
BO	2014-07-18	204.0	215.4	209.9	220.9
KAILAHUN	2014-07-18	204.0	215.4	209.9	220.9
KAILAHUN	2014-07-18	204.0	215.4	209.9	220.9
KAILAHUN	2014-07-18	204.0	215.4	209.9	220.9
MONTSERRADO	2014-07-18	204.0	215.4	209.9	220.9
CONAKRY	2014-07-18	204.0	215.4	209.9	220.9
KENEMA	2014-07-19	205.0	216.4	210.9	221.9
BOMI	2014-07-19	205.0	216.4	210.9	221.9
KAILAHUN	2014-07-19	205.0	216.4	210.9	221.9
KENEMA	2014-07-19	205.0	216.4	210.9	221.9
KAILAHUN	2014-07-19	205.0	216.4	210.9	221.9
CONAKRY	2014-07-19	205.0	216.4	210.9	221.9
KENEMA	2014-07-19	205.0	216.4	210.9	221.9
BOMBALI	2014-07-19	205.0	216.4	210.9	221.9
MARGIBI	2014-07-19	205.0	216.4	210.9	221.9
MONTSERRADO	2014-07-19	205.0	216.4	210.9	221.9
MONTSERRADO	2014-07-19	205.0	216.4	210.9	221.9
LOFA	2014-07-19	205.0	216.4	210.9	221.9
MONTSERRADO	2014-07-19	205.0	216.4	210.9	221.9
BOMI	2014-07-19	205.0	216.4	210.9	221.9
KENEMA	2014-07-19	205.0	216.4	210.9	221.9
GUECKEDOU	2014-07-19	205.0	216.4	210.9	221.9
KENEMA	2014-07-19	205.0	216.4	210.9	221.9
MONTSERRADO	2014-07-19	205.0	216.4	210.9	221.9
BOMI	2014-07-19	205.0	216.4	210.9	221.9
KENEMA	2014-07-19	205.0	216.4	210.9	221.9
KENEMA	2014-07-19	205.0	216.4	210.9	221.9
LOFA	2014-07-19	205.0	216.4	210.9	221.9
MONTSERRADO	2014-07-19	205.0	216.4	210.9	221.9
BOMI	2014-07-19	205.0	216.4	210.9	221.9
MONTSERRADO	2014-07-19	205.0	216.4	210.9	221.9
KAILAHUN	2014-07-19	205.0	216.4	210.9	221.9
BONG	2014-07-19	205.0	216.4	210.9	221.9
BOMBALI	2014-07-19	205.0	216.4	210.9	221.9
LOFA	2014-07-19	205.0	216.4	210.9	221.9
KENEMA	2014-07-19	205.0	216.4	210.9	221.9
BONG	2014-07-19	205.0	216.4	210.9	221.9
KAILAHUN	2014-07-19	205.0	216.4	210.9	221.9
LOFA	2014-07-19	205.0	216.4	210.9	221.9
LOFA	2014-07-19	205.0	216.4	210.9	221.9
NIMBA	2014-07-19	205.0	216.4	210.9	221.9
LOFA	2014-07-19	205.0	216.4	210.9	221.9
MARGIBI	2014-07-19	205.0	216.4	210.9	221.9
BONG	2014-07-20	206.0	217.4	211.9	222.9
NIMBA	2014-07-20	206.0	217.4	211.9	222.9
KAILAHUN	2014-07-20	206.0	217.4	211.9	222.9
KENEMA	2014-07-20	206.0	217.4	211.9	222.9
LOFA	2014-07-20	206.0	217.4	211.9	222.9
LOFA	2014-07-20	206.0	217.4	211.9	222.9
KAILAHUN	2014-07-20	206.0	217.4	211.9	222.9
KAILAHUN	2014-07-20	206.0	217.4	211.9	222.9
KAILAHUN	2014-07-20	206.0	217.4	211.9	222.9
KENEMA	2014-07-20	206.0	217.4	211.9	222.9
LOFA	2014-07-20	206.0	217.4	211.9	222.9
WESTERN	2014-07-20	206.0	217.4	211.9	222.9
KENEMA	2014-07-20	206.0	217.4	211.9	222.9
WESTERN	2014-07-20	206.0	217.4	211.9	222.9
CONAKRY	2014-07-20	206.0	217.4	211.9	222.9
PORT_LOKO	2014-07-20	206.0	217.4	211.9	222.9
BO	2014-07-20	206.0	217.4	211.9	222.9
KAILAHUN	2014-07-20	206.0	217.4	211.9	222.9
LOFA	2014-07-20	206.0	217.4	211.9	222.9
BO	2014-07-20	206.0	217.4	211.9	222.9
LOFA	2014-07-20	206.0	217.4	211.9	222.9
KAILAHUN	2014-07-20	206.0	217.4	211.9	222.9
LOFA	2014-07-20	206.0	217.4	211.9	222.9
KENEMA	2014-07-20	206.0	217.4	211.9	222.9
LOFA	2014-07-20	206.0	217.4	211.9	222.9
KAILAHUN	2014-07-20	206.0	217.4	211.9	222.9
LOFA	2014-07-20	206.0	217.4	211.9	222.9
LOFA	2014-07-20	206.0	217.4	211.9	222.9
MONTSERRADO	2014-07-20	206.0	217.4	211.9	222.9
MONTSERRADO	2014-07-20	206.0	217.4	211.9	222.9
BO	2014-07-21	207.0	218.4	212.9	223.9
KAILAHUN	2014-07-21	207.0	218.4	212.9	223.9
MONTSERRADO	2014-07-21	207.0	218.4	212.9	223.9
KAILAHUN	2014-07-21	207.0	218.4	212.9	223.9
MONTSERRADO	2014-07-21	207.0	218.4	212.9	223.9
KENEMA	2014-07-21	207.0	218.4	212.9	223.9
KENEMA	2014-07-21	207.0	218.4	212.9	223.9
MONTSERRADO	2014-07-21	207.0	218.4	212.9	223.9
BONG	2014-07-21	207.0	218.4	212.9	223.9
KAILAHUN	2014-07-21	207.0	218.4	212.9	223.9
KAILAHUN	2014-07-21	207.0	218.4	212.9	223.9
CONAKRY	2014-07-21	207.0	218.4	212.9	223.9
BOMBALI	2014-07-21	207.0	218.4	212.9	223.9
KAILAHUN	2014-07-21	207.0	218.4	212.9	223.9
SIGUIRI	2014-07-21	207.0	218.4	212.9	223.9
KENEMA	2014-07-21	207.0	218.4	212.9	223.9
KENEMA	2014-07-21	207.0	218.4	212.9	223.9
MONTSERRADO	2014-07-21	207.0	218.4	212.9	223.9
KENEMA	2014-07-21	207.0	218.4	212.9	223.9
BOMI	2014-07-21	207.0	218.4	212.9	223.9
BOMI	2014-07-21	207.0	218.4	212.9	223.9
KENEMA	2014-07-21	207.0	218.4	212.9	223.9
TONKOLILI	2014-07-21	207.0	218.4	212.9	223.9
BO	2014-07-21	207.0	218.4	212.9	223.9
BOMI	2014-07-21	207.0	218.4	212.9	223.9
GUECKEDOU	2014-07-21	207.0	218.4	212.9	223.9
GUECKEDOU	2014-07-21	207.0	218.4	212.9	223.9
KAILAHUN	2014-07-21	207.0	218.4	212.9	223.9
MONTSERRADO	2014-07-21	207.0	218.4	212.9	223.9
WESTERN	2014-07-21	207.0	218.4	212.9	223.9
MONTSERRADO	2014-07-22	208.0	219.4	213.9	224.9
BOMI	2014-07-22	208.0	219.4	213.9	224.9
KAILAHUN	2014-07-22	208.0	219.4	213.9	224.9
PORT_LOKO	2014-07-22	208.0	219.4	213.9	224.9
TONKOLILI	2014-07-22	208.0	219.4	213.9	224.9
MARGIBI	2014-07-22	208.0	219.4	213.9	224.9
MONTSERRADO	2014-07-22	208.0	219.4	213.9	224.9
MONTSERRADO	2014-07-22	208.0	219.4	213.9	224.9
LOFA	2014-07-22	208.0	219.4	213.9	224.9
PORT_LOKO	2014-07-22	208.0	219.4	213.9	224.9
BOMI	2014-07-22	208.0	219.4	213.9	224.9
MONTSERRADO	2014-07-22	208.0	219.4	213.9	224.9
BONG	2014-07-22	208.0	219.4	213.9	224.9
KENEMA	2014-07-22	208.0	219.4	213.9	224.9
LOFA	2014-07-22	208.0	219.4	213.9	224.9
LOFA	2014-07-22	208.0	219.4	213.9	224.9
MONTSERRADO	2014-07-22	208.0	219.4	213.9	224.9
LOFA	2014-07-22	208.0	219.4	213.9	224.9
MONTSERRADO	2014-07-22	208.0	219.4	213.9	224.9
SIGUIRI	2014-07-22	208.0	219.4	213.9	224.9
KENEMA	2014-07-22	208.0	219.4	213.9	224.9
SIGUIRI	2014-07-22	208.0	219.4	213.9	224.9
MONTSERRADO	2014-07-22	208.0	219.4	213.9	224.9
LOFA	2014-07-22	208.0	219.4	213.9	224.9
MARGIBI	2014-07-22	208.0	219.4	213.9	224.9
MONTSERRADO	2014-07-22	208.0	219.4	213.9	224.9
LOFA	2014-07-22	208.0	219.4	213.9	224.9
KAILAHUN	2014-07-22	208.0	219.4	213.9	224.9
KENEMA	2014-07-22	208.0	219.4	213.9	224.9
BOMI	2014-07-22	208.0	219.4	213.9	224.9
KENEMA	2014-07-22	208.0	219.4	213.9	224.9
BOMI	2014-07-22	208.0	219.4	213.9	224.9
MONTSERRADO	2014-07-22	208.0	219.4	213.9	224.9
KENEMA	2014-07-22	208.0	219.4	213.9	224.9
LOFA	2014-07-22	208.0	219.4	213.9	224.9
LOFA	2014-07-22	208.0	219.4	213.9	224.9
KENEMA	2014-07-22	208.0	219.4	213.9	224.9
BOMI	2014-07-22	208.0	219.4	213.9	224.9
BOMI	2014-07-22	208.0	219.4	213.9	224.9
MONTSERRADO	2014-07-22	208.0	219.4	213.9	224.9
KAILAHUN	2014-07-22	208.0	219.4	213.9	224.9
MONTSERRADO	2014-07-22	208.0	219.4	213.9	224.9
LOFA	2014-07-22	208.0	219.4	213.9	224.9
KENEMA	2014-07-22	208.0	219.4	213.9	224.9
MONTSERRADO	2014-07-22	208.0	219.4	213.9	224.9
KAILAHUN	2014-07-22	208.0	219.4	213.9	224.9
KAILAHUN	2014-07-22	208.0	219.4	213.9	224.9
LOFA	2014-07-22	208.0	219.4	213.9	224.9
BOMI	2014-07-23	209.0	220.4	214.9	225.9
KENEMA	2014-07-23	209.0	220.4	214.9	225.9
KENEMA	2014-07-23	209.0	220.4	214.9	225.9
KAILAHUN	2014-07-23	209.0	220.4	214.9	225.9
BO	2014-07-23	209.0	220.4	214.9	225.9
CONAKRY	2014-07-23	209.0	220.4	214.9	225.9
MONTSERRADO	2014-07-23	209.0	220.4	214.9	225.9
KENEMA	2014-07-23	209.0	220.4	214.9	225.9
MONTSERRADO	2014-07-23	209.0	220.4	214.9	225.9
LOFA	2014-07-23	209.0	220.4	214.9	225.9
BOMI	2014-07-23	209.0	220.4	214.9	225.9
KOUROUSSA	2014-07-23	209.0	220.4	214.9	225.9
MACENTA	2014-07-23	209.0	220.4	214.9	225.9
KAILAHUN	2014-07-23	209.0	220.4	214.9	225.9
KAILAHUN	2014-07-23	209.0	220.4	214.9	225.9
KONO	2014-07-23	209.0	220.4	214.9	225.9
MARGIBI	2014-07-23	209.0	220.4	214.9	225.9
NIMBA	2014-07-23	209.0	220.4	214.9	225.9
KENEMA	2014-07-23	209.0	220.4	214.9	225.9
KAILAHUN	2014-07-23	209.0	220.4	214.9	225.9
BOMI	2014-07-23	209.0	220.4	214.9	225.9
KENEMA	2014-07-23	209.0	220.4	214.9	225.9
CONAKRY	2014-07-23	209.0	220.4	214.9	225.9
SIGUIRI	2014-07-23	209.0	220.4	214.9	225.9
MONTSERRADO	2014-07-23	209.0	220.4	214.9	225.9
BOMI	2014-07-23	209.0	220.4	214.9	225.9
KENEMA	2014-07-23	209.0	220.4	214.9	225.9
MARGIBI	2014-07-23	209.0	220.4	214.9	225.9
KAILAHUN	2014-07-24	210.0	221.4	215.9	226.9
KENEMA	2014-07-24	210.0	221.4	215.9	226.9
MARGIBI	2014-07-24	210.0	221.4	215.9	226.9
BOMI	2014-07-24	210.0	221.4	215.9	226.9
MACENTA	2014-07-24	210.0	221.4	215.9	226.9
NIMBA	2014-07-24	210.0	221.4	215.9	226.9
BO	2014-07-24	210.0	221.4	215.9	226.9
KENEMA	2014-07-24	210.0	221.4	215.9	226.9
MONTSERRADO	2014-07-24	210.0	221.4	215.9	226.9
KAILAHUN	2014-07-24	210.0	221.4	215.9	226.9
MONTSERRADO	2014-07-24	210.0	221.4	215.9	226.9
KENEMA	2014-07-24	210.0	221.4	215.9	226.9
KENEMA	2014-07-24	210.0	221.4	215.9	226.9
CONAKRY	2014-07-24	210.0	221.4	215.9	226.9
LOFA	2014-07-24	210.0	221.4	215.9	226.9
PORT_LOKO	2014-07-24	210.0	221.4	215.9	226.9
MONTSERRADO	2014-07-24	210.0	221.4	215.9	226.9
LOFA	2014-07-24	210.0	221.4	215.9	226.9
MONTSERRADO	2014-07-24	210.0	221.4	215.9	226.9
KAILAHUN	2014-07-24	210.0	221.4	215.9	226.9
MARGIBI	2014-07-24	210.0	221.4	215.9	226.9
MONTSERRADO	2014-07-24	210.0	221.4	215.9	226.9
NIMBA	2014-07-24	210.0	221.4	215.9	226.9
LOFA	2014-07-25	211.0	222.4	216.9	227.9
BONG	2014-07-25	211.0	222.4	216.9	227.9
MONTSERRADO	2014-07-25	211.0	222.4	216.9	227.9
PORT_LOKO	2014-07-25	211.0	222.4	216.9	227.9
MONTSERRADO	2014-07-25	211.0	222.4	216.9	227.9
MONTSERRADO	2014-07-25	211.0	222.4	216.9	227.9
KAILAHUN	2014-07-25	211.0	222.4	216.9	227.9
MONTSERRADO	2014-07-25	211.0	222.4	216.9	227.9
PORT_LOKO	2014-07-25	211.0	222.4	216.9	227.9
LOFA	2014-07-25	211.0	222.4	216.9	227.9
MONTSERRADO	2014-07-25	211.0	222.4	216.9	227.9
LOFA	2014-07-25	211.0	222.4	216.9	227.9
BO	2014-07-25	211.0	222.4	216.9	227.9
KENEMA	2014-07-25	211.0	222.4	216.9	227.9
KAILAHUN	2014-07-25	211.0	222.4	216.9	227.9
BOMI	2014-07-25	211.0	222.4	216.9	227.9
LOFA	2014-07-25	211.0	222.4	216.9	227.9
LOFA	2014-07-25	211.0	222.4	216.9	227.9
KENEMA	2014-07-25	211.0	222.4	216.9	227.9
KENEMA	2014-07-25	211.0	222.4	216.9	227.9
LOFA	2014-07-25	211.0	222.4	216.9	227.9
GUECKEDOU	2014-07-25	211.0	222.4	216.9	227.9
KAILAHUN	2014-07-25	211.0	222.4	216.9	227.9
BONG	2014-07-25	211.0	222.4	216.9	227.9
KAILAHUN	2014-07-25	211.0	222.4	216.9	227.9
LOFA	2014-07-25	211.0	222.4	216.9	227.9
MONTSERRADO	2014-07-25	211.0	222.4	216.9	227.9
PORT_LOKO	2014-07-25	211.0	222.4	216.9	227.9
PORT_LOKO	2014-07-25	211.0	222.4	216.9	227.9
KENEMA	2014-07-25	211.0	222.4	216.9	227.9
KENEMA	2014-07-25	211.0	222.4	216.9	227.9
MONTSERRADO	2014-07-25	211.0	222.4	216.9	227.9
GRAND_BASSA	2014-07-25	211.0	222.4	216.9	227.9
MONTSERRADO	2014-07-25	211.0	222.4	216.9	227.9
LOFA	2014-07-25	211.0	222.4	216.9	227.9
KENEMA	2014-07-25	211.0	222.4	216.9	227.9
LOFA	2014-07-25	211.0	222.4	216.9	227.9
WESTERN	2014-07-25	211.0	222.4	216.9	227.9
GUECKEDOU	2014-07-25	211.0	222.4	216.9	227.9
NIMBA	2014-07-26	212.0	223.4	217.9	228.9
MONTSERRADO	2014-07-26	212.0	223.4	217.9	228.9
KAILAHUN	2014-07-26	212.0	223.4	217.9	228.9
KAILAHUN	2014-07-26	212.0	223.4	217.9	228.9
LOFA	2014-07-26	212.0	223.4	217.9	228.9
KENEMA	2014-07-26	212.0	223.4	217.9	228.9
KENEMA	2014-07-26	212.0	223.4	217.9	228.9
KAILAHUN	2014-07-26	212.0	223.4	217.9	228.9
MONTSERRADO	2014-07-26	212.0	223.4	217.9	228.9
KENEMA	2014-07-26	212.0	223.4	217.9	228.9
RIVERCESS	2014-07-26	212.0	223.4	217.9	228.9
NIMBA	2014-07-26	212.0	223.4	217.9	228.9
MONTSERRADO	2014-07-26	212.0	223.4	217.9	228.9
MONTSERRADO	2014-07-26	212.0	223.4	217.9	228.9
MONTSERRADO	2014-07-26	212.0	223.4	217.9	228.9
LOFA	2014-07-26	212.0	223.4	217.9	228.9
KAILAHUN	2014-07-26	212.0	223.4	217.9	228.9
WESTERN	2014-07-26	212.0	223.4	217.9	228.9
MONTSERRADO	2014-07-26	212.0	223.4	217.9	228.9
KAILAHUN	2014-07-26	212.0	223.4	217.9	228.9
RIVER_GEE	2014-07-26	212.0	223.4	217.9	228.9
MONTSERRADO	2014-07-26	212.0	223.4	217.9	228.9
BO	2014-07-26	212.0	223.4	217.9	228.9
NIMBA	2014-07-26	212.0	223.4	217.9	228.9
KAILAHUN	2014-07-26	212.0	223.4	217.9	228.9
LOFA	2014-07-26	212.0	223.4	217.9	228.9
MONTSERRADO	2014-07-26	212.0	223.4	217.9	228.9
PORT_LOKO	2014-07-26	212.0	223.4	217.9	228.9
RIVERCESS	2014-07-26	212.0	223.4	217.9	228.9
MONTSERRADO	2014-07-26	212.0	223.4	217.9	228.9
BOMI	2014-07-27	213.0	224.4	218.9	229.9
BOMI	2014-07-27	213.0	224.4	218.9	229.9
KAILAHUN	2014-07-27	213.0	224.4	218.9	229.9
MONTSERRADO	2014-07-27	213.0	224.4	218.9	229.9
BOMI	2014-07-27	213.0	224.4	218.9	229.9
MARGIBI	2014-07-27	213.0	224.4	218.9	229.9
MONTSERRADO	2014-07-27	213.0	224.4	218.9	229.9
MONTSERRADO	2014-07-27	213.0	224.4	218.9	229.9
KENEMA	2014-07-27	213.0	224.4	218.9	229.9
KENEMA	2014-07-27	213.0	224.4	218.9	229.9
MONTSERRADO	2014-07-27	213.0	224.4	218.9	229.9
KAILAHUN	2014-07-27	213.0	224.4	218.9	229.9
LOFA	2014-07-27	213.0	224.4	218.9	229.9
KONO	2014-07-27	213.0	224.4	218.9	229.9
MONTSERRADO	2014-07-27	213.0	224.4	218.9	229.9
MARGIBI	2014-07-27	213.0	224.4	218.9	229.9
KAILAHUN	2014-07-27	213.0	224.4	218.9	229.9
MACENTA	2014-07-27	213.0	224.4	218.9	229.9
MARGIBI	2014-07-27	213.0	224.4	218.9	229.9
LOFA	2014-07-27	213.0	224.4	218.9	229.9
LOFA	2014-07-27	213.0	224.4	218.9	229.9
KENEMA	2014-07-27	213.0	224.4	218.9	229.9
NIMBA	2014-07-27	213.0	224.4	218.9	229.9
KAILAHUN	2014-07-27	213.0	224.4	218.9	229.9
MONTSERRADO	2014-07-27	213.0	224.4	218.9	229.9
KAILAHUN	2014-07-27	213.0	224.4	218.9	229.9
LOFA	2014-07-27	213.0	224.4	218.9	229.9
LOFA	2014-07-27	213.0	224.4	218.9	229.9
LOFA	2014-07-27	213.0	224.4	218.9	229.9
GRAND_BASSA	2014-07-27	213.0	224.4	218.9	229.9
MONTSERRADO	2014-07-27	213.0	224.4	218.9	229.9
MARGIBI	2014-07-27	213.0	224.4	218.9	229.9
MONTSERRADO	2014-07-27	213.0	224.4	218.9	229.9
BO	2014-07-27	213.0	224.4	218.9	229.9
MONTSERRADO	2014-07-27	213.0	224.4	218.9	229.9
KAILAHUN	2014-07-27	213.0	224.4	218.9	229.9
KENEMA	2014-07-27	213.0	224.4	218.9	229.9
KAILAHUN	2014-07-27	213.0	224.4	218.9	229.9
MONTSERRADO	2014-07-27	213.0	224.4	218.9	229.9
MONTSERRADO	2014-07-27	213.0	224.4	218.9	229.9
BONG	2014-07-27	213.0	224.4	218.9	229.9
KENEMA	2014-07-27	213.0	224.4	218.9	229.9
LOFA	2014-07-27	213.0	224.4	218.9	229.9
MONTSERRADO	2014-07-27	213.0	224.4	218.9	229.9
MONTSERRADO	2014-07-27	213.0	224.4	218.9	229.9
MONTSERRADO	2014-07-27	213.0	224.4	218.9	229.9
MONTSERRADO	2014-07-27	213.0	224.4	218.9	229.9
MARGIBI	2014-07-27	213.0	224.4	218.9	229.9
MOYAMBA	2014-07-27	213.0	224.4	218.9	229.9
LOFA	2014-07-27	213.0	224.4	218.9	229.9
MARGIBI	2014-07-27	213.0	224.4	218.9	229.9
KAILAHUN	2014-07-27	213.0	224.4	218.9	229.9
KENEMA	2014-07-27	213.0	224.4	218.9	229.9
MONTSERRADO	2014-07-27	213.0	224.4	218.9	229.9
LOFA	2014-07-27	213.0	224.4	218.9	229.9
WESTERN	2014-07-27	213.0	224.4	218.9	229.9
LOFA	2014-07-27	213.0	224.4	218.9	229.9
LOFA	2014-07-27	213.0	224.4	218.9	229.9
MONTSERRADO	2014-07-27	213.0	224.4	218.9	229.9
KENEMA	2014-07-27	213.0	224.4	218.9	229.9
KENEMA	2014-07-28	214.0	225.4	219.9	230.9
MONTSERRADO	2014-07-28	214.0	225.4	219.9	230.9
KENEMA	2014-07-28	214.0	225.4	219.9	230.9
MONTSERRADO	2014-07-28	214.0	225.4	219.9	230.9
KENEMA	2014-07-28	214.0	225.4	219.9	230.9
KENEMA	2014-07-28	214.0	225.4	219.9	230.9
KENEMA	2014-07-28	214.0	225.4	219.9	230.9
SIGUIRI	2014-07-28	214.0	225.4	219.9	230.9
BOMBALI	2014-07-28	214.0	225.4	219.9	230.9
MONTSERRADO	2014-07-28	214.0	225.4	219.9	230.9
BONG	2014-07-28	214.0	225.4	219.9	230.9
LOFA	2014-07-28	214.0	225.4	219.9	230.9
LOFA	2014-07-28	214.0	225.4	219.9	230.9
MONTSERRADO	2014-07-28	214.0	225.4	219.9	230.9
PUJEHUN	2014-07-28	214.0	225.4	219.9	230.9
GRAND_CAPE_MOUNT	2014-07-28	214.0	225.4	219.9	230.9
MONTSERRADO	2014-07-28	214.0	225.4	219.9	230.9
MONTSERRADO	2014-07-28	214.0	225.4	219.9	230.9
MARGIBI	2014-07-28	214.0	225.4	219.9	230.9
BOMBALI	2014-07-28	214.0	225.4	219.9	230.9
KAILAHUN	2014-07-28	214.0	225.4	219.9	230.9
BO	2014-07-28	214.0	225.4	219.9	230.9
KENEMA	2014-07-28	214.0	225.4	219.9	230.9
LOFA	2014-07-28	214.0	225.4	219.9	230.9
LOFA	2014-07-28	214.0	225.4	219.9	230.9
MONTSERRADO	2014-07-28	214.0	225.4	219.9	230.9
KAILAHUN	2014-07-28	214.0	225.4	219.9	230.9
MONTSERRADO	2014-07-28	214.0	225.4	219.9	230.9
KAILAHUN	2014-07-28	214.0	225.4	219.9	230.9
PORT_LOKO	2014-07-28	214.0	225.4	219.9	230.9
MONTSERRADO	2014-07-28	214.0	225.4	219.9	230.9
GRAND_BASSA	2014-07-28	214.0	225.4	219.9	230.9
MONTSERRADO	2014-07-28	214.0	225.4	219.9	230.9
CONAKRY	2014-07-28	214.0	225.4	219.9	230.9
KENEMA	2014-07-28	214.0	225.4	219.9	230.9
MONTSERRADO	2014-07-28	214.0	225.4	219.9	230.9
PORT_LOKO	2014-07-28	214.0	225.4	219.9	230.9
MONTSERRADO	2014-07-28	214.0	225.4	219.9	230.9
LOFA	2014-07-28	214.0	225.4	219.9	230.9
PUJEHUN	2014-07-28	214.0	225.4	219.9	230.9
GRAND_BASSA	2014-07-28	214.0	225.4	219.9	230.9
LOFA	2014-07-28	214.0	225.4	219.9	230.9
MONTSERRADO	2014-07-28	214.0	225.4	219.9	230.9
MONTSERRADO	2014-07-28	214.0	225.4	219.9	230.9
KAILAHUN	2014-07-28	214.0	225.4	219.9	230.9
KENEMA	2014-07-28	214.0	225.4	219.9	230.9
GRAND_BASSA	2014-07-28	214.0	225.4	219.9	230.9
MOYAMBA	2014-07-28	214.0	225.4	219.9	230.9
MONTSERRADO	2014-07-29	215.0	226.4	220.9	231.9
BOMI	2014-07-29	215.0	226.4	220.9	231.9
KAILAHUN	2014-07-29	215.0	226.4	220.9	231.9
KAILAHUN	2014-07-29	215.0	226.4	220.9	231.9
PORT_LOKO	2014-07-29	215.0	226.4	220.9	231.9
KENEMA	2014-07-29	215.0	226.4	220.9	231.9
KAILAHUN	2014-07-29	215.0	226.4	220.9	231.9
MONTSERRADO	2014-07-29	215.0	226.4	220.9	231.9
KAILAHUN	2014-07-29	215.0	226.4	220.9	231.9
WESTERN	2014-07-29	215.0	226.4	220.9	231.9
MONTSERRADO	2014-07-29	215.0	226.4	220.9	231.9
LOFA	2014-07-29	215.0	226.4	220.9	231.9
KAILAHUN	2014-07-29	215.0	226.4	220.9	231.9
KAILAHUN	2014-07-29	215.0	226.4	220.9	231.9
KAILAHUN	2014-07-29	215.0	226.4	220.9	231.9
MONTSERRADO	2014-07-29	215.0	226.4	220.9	231.9
KAILAHUN	2014-07-29	215.0	226.4	220.9	231.9
MARGIBI	2014-07-29	215.0	226.4	220.9	231.9
KAILAHUN	2014-07-29	215.0	226.4	220.9	231.9
KAILAHUN	2014-07-29	215.0	226.4	220.9	231.9
MONTSERRADO	2014-07-29	215.0	226.4	220.9	231.9
KAILAHUN	2014-07-29	215.0	226.4	220.9	231.9
LOFA	2014-07-29	215.0	226.4	220.9	231.9
LOFA	2014-07-29	215.0	226.4	220.9	231.9
MONTSERRADO	2014-07-29	215.0	226.4	220.9	231.9
KAILAHUN	2014-07-29	215.0	226.4	220.9	231.9
MONTSERRADO	2014-07-29	215.0	226.4	220.9	231.9
LOFA	2014-07-29	215.0	226.4	220.9	231.9
KAILAHUN	2014-07-29	215.0	226.4	220.9	231.9
KENEMA	2014-07-29	215.0	226.4	220.9	231.9
LOFA	2014-07-29	215.0	226.4	220.9	231.9
MONTSERRADO	2014-07-29	215.0	226.4	220.9	231.9
MONTSERRADO	2014-07-29	215.0	226.4	220.9	231.9
KENEMA	2014-07-29	215.0	226.4	220.9	231.9
WESTERN	2014-07-29	215.0	226.4	220.9	231.9
CONAKRY	2014-07-29	215.0	226.4	220.9	231.9
KONO	2014-07-29	215.0	226.4	220.9	231.9
KENEMA	2014-07-29	215.0	226.4	220.9	231.9
KAILAHUN	2014-07-29	215.0	226.4	220.9	231.9
WESTERN	2014-07-29	215.0	226.4	220.9	231.9
MONTSERRADO	2014-07-29	215.0	226.4	220.9	231.9
KENEMA	2014-07-29	215.0	226.4	220.9	231.9
MONTSERRADO	2014-07-29	215.0	226.4	220.9	231.9
BONG	2014-07-29	215.0	226.4	220.9	231.9
GRAND_BASSA	2014-07-29	215.0	226.4	220.9	231.9
MOYAMBA	2014-07-29	215.0	226.4	220.9	231.9
BOMI	2014-07-29	215.0	226.4	220.9	231.9
BOMI	2014-07-29	215.0	226.4	220.9	231.9
MONTSERRADO	2014-07-29	215.0	226.4	220.9	231.9
MARGIBI	2014-07-30	216.0	227.4	221.9	232.9
BO	2014-07-30	216.0	227.4	221.9	232.9
MARGIBI	2014-07-30	216.0	227.4	221.9	232.9
MARGIBI	2014-07-30	216.0	227.4	221.9	232.9
MONTSERRADO	2014-07-30	216.0	227.4	221.9	232.9
NIMBA	2014-07-30	216.0	227.4	221.9	232.9
GRAND_BASSA	2014-07-30	216.0	227.4	221.9	232.9
MONTSERRADO	2014-07-30	216.0	227.4	221.9	232.9
LOFA	2014-07-30	216.0	227.4	221.9	232.9
BO	2014-07-30	216.0	227.4	221.9	232.9
KAILAHUN	2014-07-30	216.0	227.4	221.9	232.9
BO	2014-07-30	216.0	227.4	221.9	232.9
MONTSERRADO	2014-07-30	216.0	227.4	221.9	232.9
PUJEHUN	2014-07-30	216.0	227.4	221.9	232.9
MONTSERRADO	2014-07-30	216.0	227.4	221.9	232.9
MONTSERRADO	2014-07-30	216.0	227.4	221.9	232.9
KAILAHUN	2014-07-30	216.0	227.4	221.9	232.9
MONTSERRADO	2014-07-30	216.0	227.4	221.9	232.9
MARGIBI	2014-07-30	216.0	227.4	221.9	232.9
KENEMA	2014-07-30	216.0	227.4	221.9	232.9
BOMI	2014-07-30	216.0	227.4	221.9	232.9
KAILAHUN	2014-07-30	216.0	227.4	221.9	232.9
MONTSERRADO	2014-07-30	216.0	227.4	221.9	232.9
KAILAHUN	2014-07-30	216.0	227.4	221.9	232.9
NZEREKORE	2014-07-30	216.0	227.4	221.9	232.9
MONTSERRADO	2014-07-30	216.0	227.4	221.9	232.9
KENEMA	2014-07-30	216.0	227.4	221.9	232.9
NZEREKORE	2014-07-30	216.0	227.4	221.9	232.9
KAILAHUN	2014-07-30	216.0	227.4	221.9	232.9
MONTSERRADO	2014-07-30	216.0	227.4	221.9	232.9
NZEREKORE	2014-07-30	216.0	227.4	221.9	232.9
KAILAHUN	2014-07-30	216.0	227.4	221.9	232.9
KENEMA	2014-07-30	216.0	227.4	221.9	232.9
LOFA	2014-07-30	216.0	227.4	221.9	232.9
MONTSERRADO	2014-07-30	216.0	227.4	221.9	232.9
MONTSERRADO	2014-07-30	216.0	227.4	221.9	232.9
PORT_LOKO	2014-07-30	216.0	227.4	221.9	232.9
BOMI	2014-07-30	216.0	227.4	221.9	232.9
GRAND_CAPE_MOUNT	2014-07-30	216.0	227.4	221.9	232.9
KENEMA	2014-07-30	216.0	227.4	221.9	232.9
LOFA	2014-07-30	216.0	227.4	221.9	232.9
KAILAHUN	2014-07-30	216.0	227.4	221.9	232.9
KENEMA	2014-07-31	217.0	228.4	222.9	233.9
KAILAHUN	2014-07-31	217.0	228.4	222.9	233.9
KENEMA	2014-07-31	217.0	228.4	222.9	233.9
KAILAHUN	2014-07-31	217.0	228.4	222.9	233.9
MONTSERRADO	2014-07-31	217.0	228.4	222.9	233.9
LOFA	2014-07-31	217.0	228.4	222.9	233.9
MONTSERRADO	2014-07-31	217.0	228.4	222.9	233.9
MONTSERRADO	2014-07-31	217.0	228.4	222.9	233.9
KAILAHUN	2014-07-31	217.0	228.4	222.9	233.9
KENEMA	2014-07-31	217.0	228.4	222.9	233.9
MONTSERRADO	2014-07-31	217.0	228.4	222.9	233.9
MONTSERRADO	2014-07-31	217.0	228.4	222.9	233.9
MONTSERRADO	2014-07-31	217.0	228.4	222.9	233.9
PORT_LOKO	2014-07-31	217.0	228.4	222.9	233.9
LOFA	2014-07-31	217.0	228.4	222.9	233.9
WESTERN	2014-07-31	217.0	228.4	222.9	233.9
PORT_LOKO	2014-07-31	217.0	228.4	222.9	233.9
LOFA	2014-07-31	217.0	228.4	222.9	233.9
MONTSERRADO	2014-07-31	217.0	228.4	222.9	233.9
WESTERN	2014-07-31	217.0	228.4	222.9	233.9
KAILAHUN	2014-07-31	217.0	228.4	222.9	233.9
MARGIBI	2014-07-31	217.0	228.4	222.9	233.9
LOFA	2014-07-31	217.0	228.4	222.9	233.9
GUECKEDOU	2014-07-31	217.0	228.4	222.9	233.9
LOFA	2014-07-31	217.0	228.4	222.9	233.9
MARGIBI	2014-07-31	217.0	228.4	222.9	233.9
MONTSERRADO	2014-07-31	217.0	228.4	222.9	233.9
MONTSERRADO	2014-07-31	217.0	228.4	222.9	233.9
KAILAHUN	2014-07-31	217.0	228.4	222.9	233.9
MARGIBI	2014-07-31	217.0	228.4	222.9	233.9
MARGIBI	2014-07-31	217.0	228.4	222.9	233.9
LOFA	2014-07-31	217.0	228.4	222.9	233.9
KAILAHUN	2014-07-31	217.0	228.4	222.9	233.9
BO	2014-07-31	217.0	228.4	222.9	233.9
MONTSERRADO	2014-07-31	217.0	228.4	222.9	233.9
KENEMA	2014-07-31	217.0	228.4	222.9	233.9
WESTERN	2014-07-31	217.0	228.4	222.9	233.9
MONTSERRADO	2014-07-31	217.0	228.4	222.9	233.9
KAILAHUN	2014-07-31	217.0	228.4	222.9	233.9
KENEMA	2014-07-31	217.0	228.4	222.9	233.9
MARGIBI	2014-07-31	217.0	228.4	222.9	233.9
MONTSERRADO	2014-07-31	217.0	228.4	222.9	233.9
LOFA	2014-07-31	217.0	228.4	222.9	233.9
LOFA	2014-07-31	217.0	228.4	222.9	233.9
GRAND_BASSA	2014-07-31	217.0	228.4	222.9	233.9
MARGIBI	2014-07-31	217.0	228.4	222.9	233.9
LOFA	2014-07-31	217.0	228.4	222.9	233.9
KAILAHUN	2014-07-31	217.0	228.4	222.9	233.9
MONTSERRADO	2014-08-01	218.0	229.4	223.9	234.9
KENEMA	2014-08-01	218.0	229.4	223.9	234.9
MONTSERRADO	2014-08-01	218.0	229.4	223.9	234.9
PORT_LOKO	2014-08-01	218.0	229.4	223.9	234.9
MONTSERRADO	2014-08-01	218.0	229.4	223.9	234.9
KENEMA	2014-08-01	218.0	229.4	223.9	234.9
MONTSERRADO	2014-08-01	218.0	229.4	223.9	234.9
KAILAHUN	2014-08-01	218.0	229.4	223.9	234.9
MONTSERRADO	2014-08-01	218.0	229.4	223.9	234.9
KAILAHUN	2014-08-01	218.0	229.4	223.9	234.9
LOFA	2014-08-01	218.0	229.4	223.9	234.9
NIMBA	2014-08-01	218.0	229.4	223.9	234.9
PORT_LOKO	2014-08-01	218.0	229.4	223.9	234.9
MOYAMBA	2014-08-01	218.0	229.4	223.9	234.9
KENEMA	2014-08-01	218.0	229.4	223.9	234.9
MONTSERRADO	2014-08-01	218.0	229.4	223.9	234.9
KAILAHUN	2014-08-01	218.0	229.4	223.9	234.9
KAILAHUN	2014-08-01	218.0	229.4	223.9	234.9
MOYAMBA	2014-08-01	218.0	229.4	223.9	234.9
CONAKRY	2014-08-01	218.0	229.4	223.9	234.9
MONTSERRADO	2014-08-01	218.0	229.4	223.9	234.9
KENEMA	2014-08-01	218.0	229.4	223.9	234.9
MONTSERRADO	2014-08-01	218.0	229.4	223.9	234.9
MONTSERRADO	2014-08-01	218.0	229.4	223.9	234.9
MONTSERRADO	2014-08-01	218.0	229.4	223.9	234.9
MONTSERRADO	2014-08-01	218.0	229.4	223.9	234.9
MONTSERRADO	2014-08-01	218.0	229.4	223.9	234.9
MARGIBI	2014-08-01	218.0	229.4	223.9	234.9
KENEMA	2014-08-01	218.0	229.4	223.9	234.9
MONTSERRADO	2014-08-01	218.0	229.4	223.9	234.9
KAILAHUN	2014-08-01	218.0	229.4	223.9	234.9
GUECKEDOU	2014-08-01	218.0	229.4	223.9	234.9
KAILAHUN	2014-08-01	218.0	229.4	223.9	234.9
MARGIBI	2014-08-01	218.0	229.4	223.9	234.9
MONTSERRADO	2014-08-01	218.0	229.4	223.9	234.9
TONKOLILI	2014-08-01	218.0	229.4	223.9	234.9
BO	2014-08-01	218.0	229.4	223.9	234.9
KAILAHUN	2014-08-01	218.0	229.4	223.9	234.9
GUECKEDOU	2014-08-01	218.0	229.4	223.9	234.9
MARGIBI	2014-08-01	218.0	229.4	223.9	234.9
MARGIBI	2014-08-01	218.0	229.4	223.9	234.9
MONTSERRADO	2014-08-01	218.0	229.4	223.9	234.9
KENEMA	2014-08-01	218.0	229.4	223.9	234.9
MARGIBI	2014-08-01	218.0	229.4	223.9	234.9
MONTSERRADO	2014-08-01	218.0	229.4	223.9	234.9
MONTSERRADO	2014-08-01	218.0	229.4	223.9	234.9
MACENTA	2014-08-01	218.0	229.4	223.9	234.9
MONTSERRADO	2014-08-01	218.0	229.4	223.9	234.9
WESTERN	2014-08-01	218.0	229.4	223.9	234.9
KENEMA	2014-08-01	218.0	229.4	223.9	234.9
KAILAHUN	2014-08-01	218.0	229.4	223.9	234.9
LOFA	2014-08-01	218.0	229.4	223.9	234.9
MONTSERRADO	2014-08-01	218.0	229.4	223.9	234.9
MONTSERRADO	2014-08-01	218.0	229.4	223.9	234.9
MONTSERRADO	2014-08-01	218.0	229.4	223.9	234.9
MARGIBI	2014-08-01	218.0	229.4	223.9	234.9
MONTSERRADO	2014-08-01	218.0	229.4	223.9	234.9
MARGIBI	2014-08-01	218.0	229.4	223.9	234.9
MARGIBI	2014-08-01	218.0	229.4	223.9	234.9
MONTSERRADO	2014-08-01	218.0	229.4	223.9	234.9
MONTSERRADO	2014-08-01	218.0	229.4	223.9	234.9
KENEMA	2014-08-01	218.0	229.4	223.9	234.9
MONTSERRADO	2014-08-01	218.0	229.4	223.9	234.9
KENEMA	2014-08-01	218.0	229.4	223.9	234.9
MARGIBI	2014-08-01	218.0	229.4	223.9	234.9
KAILAHUN	2014-08-01	218.0	229.4	223.9	234.9
MARGIBI	2014-08-01	218.0	229.4	223.9	234.9
MARGIBI	2014-08-01	218.0	229.4	223.9	234.9
LOFA	2014-08-01	218.0	229.4	223.9	234.9
KENEMA	2014-08-01	218.0	229.4	223.9	234.9
CONAKRY	2014-08-01	218.0	229.4	223.9	234.9
LOFA	2014-08-01	218.0	229.4	223.9	234.9
MONTSERRADO	2014-08-01	218.0	229.4	223.9	234.9
MONTSERRADO	2014-08-01	218.0	229.4	223.9	234.9
MONTSERRADO	2014-08-01	218.0	229.4	223.9	234.9
KAILAHUN	2014-08-01	218.0	229.4	223.9	234.9
LOFA	2014-08-01	218.0	229.4	223.9	234.9
MARGIBI	2014-08-01	218.0	229.4	223.9	234.9
MONTSERRADO	2014-08-01	218.0	229.4	223.9	234.9
MOYAMBA	2014-08-01	218.0	229.4	223.9	234.9
MONTSERRADO	2014-08-01	218.0	229.4	223.9	234.9
MARGIBI	2014-08-01	218.0	229.4	223.9	234.9
PORT_LOKO	2014-08-01	218.0	229.4	223.9	234.9
LOFA	2014-08-01	218.0	229.4	223.9	234.9
KAILAHUN	2014-08-01	218.0	229.4	223.9	234.9
MONTSERRADO	2014-08-01	218.0	229.4	223.9	234.9
BONG	2014-08-01	218.0	229.4	223.9	234.9
MARGIBI	2014-08-01	218.0	229.4	223.9	234.9
MARGIBI	2014-08-01	218.0	229.4	223.9	234.9
MARGIBI	2014-08-01	218.0	229.4	223.9	234.9
PORT_LOKO	2014-08-01	218.0	229.4	223.9	234.9
MONTSERRADO	2014-08-02	219.0	230.4	224.9	235.9
KAILAHUN	2014-08-02	219.0	230.4	224.9	235.9
MONTSERRADO	2014-08-02	219.0	230.4	224.9	235.9
KENEMA	2014-08-02	219.0	230.4	224.9	235.9
GUECKEDOU	2014-08-02	219.0	230.4	224.9	235.9
KAILAHUN	2014-08-02	219.0	230.4	224.9	235.9
KAILAHUN	2014-08-02	219.0	230.4	224.9	235.9
MONTSERRADO	2014-08-02	219.0	230.4	224.9	235.9
KENEMA	2014-08-02	219.0	230.4	224.9	235.9
MONTSERRADO	2014-08-02	219.0	230.4	224.9	235.9
LOFA	2014-08-02	219.0	230.4	224.9	235.9
MONTSERRADO	2014-08-02	219.0	230.4	224.9	235.9
MONTSERRADO	2014-08-02	219.0	230.4	224.9	235.9
MOYAMBA	2014-08-02	219.0	230.4	224.9	235.9
YOMOU	2014-08-02	219.0	230.4	224.9	235.9
KAILAHUN	2014-08-02	219.0	230.4	224.9	235.9
KENEMA	2014-08-02	219.0	230.4	224.9	235.9
MONTSERRADO	2014-08-02	219.0	230.4	224.9	235.9
KAILAHUN	2014-08-02	219.0	230.4	224.9	235.9
MARGIBI	2014-08-02	219.0	230.4	224.9	235.9
MONTSERRADO	2014-08-02	219.0	230.4	224.9	235.9
MONTSERRADO	2014-08-02	219.0	230.4	224.9	235.9
MONTSERRADO	2014-08-02	219.0	230.4	224.9	235.9
MONTSERRADO	2014-08-02	219.0	230.4	224.9	235.9
MONTSERRADO	2014-08-02	219.0	230.4	224.9	235.9
KENEMA	2014-08-02	219.0	230.4	224.9	235.9
MONTSERRADO	2014-08-02	219.0	230.4	224.9	235.9
KAILAHUN	2014-08-02	219.0	230.4	224.9	235.9
MONTSERRADO	2014-08-02	219.0	230.4	224.9	235.9
WESTERN	2014-08-02	219.0	230.4	224.9	235.9
KENEMA	2014-08-02	219.0	230.4	224.9	235.9
MONTSERRADO	2014-08-02	219.0	230.4	224.9	235.9
KONO	2014-08-02	219.0	230.4	224.9	235.9
KENEMA	2014-08-02	219.0	230.4	224.9	235.9
KAILAHUN	2014-08-02	219.0	230.4	224.9	235.9
KAILAHUN	2014-08-02	219.0	230.4	224.9	235.9
MONTSERRADO	2014-08-02	219.0	230.4	224.9	235.9
MONTSERRADO	2014-08-02	219.0	230.4	224.9	235.9
PORT_LOKO	2014-08-02	219.0	230.4	224.9	235.9
PORT_LOKO	2014-08-02	219.0	230.4	224.9	235.9
KAILAHUN	2014-08-02	219.0	230.4	224.9	235.9
MONTSERRADO	2014-08-02	219.0	230.4	224.9	235.9
MONTSERRADO	2014-08-02	219.0	230.4	224.9	235.9
LOFA	2014-08-02	219.0	230.4	224.9	235.9
NIMBA	2014-08-02	219.0	230.4	224.9	235.9
KAILAHUN	2014-08-02	219.0	230.4	224.9	235.9
MARGIBI	2014-08-02	219.0	230.4	224.9	235.9
MONTSERRADO	2014-08-02	219.0	230.4	224.9	235.9
MONTSERRADO	2014-08-02	219.0	230.4	224.9	235.9
MARGIBI	2014-08-02	219.0	230.4	224.9	235.9
LOFA	2014-08-02	219.0	230.4	224.9	235.9
MONTSERRADO	2014-08-02	219.0	230.4	224.9	235.9
MONTSERRADO	2014-08-02	219.0	230.4	224.9	235.9
BO	2014-08-02	219.0	230.4	224.9	235.9
MONTSERRADO	2014-08-02	219.0	230.4	224.9	235.9
MONTSERRADO	2014-08-02	219.0	230.4	224.9	235.9
MONTSERRADO	2014-08-02	219.0	230.4	224.9	235.9
MONTSERRADO	2014-08-02	219.0	230.4	224.9	235.9
MONTSERRADO	2014-08-02	219.0	230.4	224.9	235.9
MONTSERRADO	2014-08-02	219.0	230.4	224.9	235.9
MONTSERRADO	2014-08-02	219.0	230.4	224.9	235.9
MONTSERRADO	2014-08-02	219.0	230.4	224.9	235.9
MONTSERRADO	2014-08-02	219.0	230.4	224.9	235.9
NIMBA	2014-08-02	219.0	230.4	224.9	235.9
WESTERN	2014-08-02	219.0	230.4	224.9	235.9
MARGIBI	2014-08-02	219.0	230.4	224.9	235.9
MARGIBI	2014-08-02	219.0	230.4	224.9	235.9
LOFA	2014-08-02	219.0	230.4	224.9	235.9
LOFA	2014-08-02	219.0	230.4	224.9	235.9
MONTSERRADO	2014-08-02	219.0	230.4	224.9	235.9
MONTSERRADO	2014-08-02	219.0	230.4	224.9	235.9
BO	2014-08-02	219.0	230.4	224.9	235.9
MONTSERRADO	2014-08-02	219.0	230.4	224.9	235.9
MONTSERRADO	2014-08-02	219.0	230.4	224.9	235.9
NIMBA	2014-08-02	219.0	230.4	224.9	235.9
LOFA	2014-08-02	219.0	230.4	224.9	235.9
MONTSERRADO	2014-08-02	219.0	230.4	224.9	235.9
MONTSERRADO	2014-08-02	219.0	230.4	224.9	235.9
MONTSERRADO	2014-08-02	219.0	230.4	224.9	235.9
MONTSERRADO	2014-08-02	219.0	230.4	224.9	235.9
MONTSERRADO	2014-08-02	219.0	230.4	224.9	235.9
MONTSERRADO	2014-08-02	219.0	230.4	224.9	235.9
KAILAHUN	2014-08-02	219.0	230.4	224.9	235.9
MONTSERRADO	2014-08-02	219.0	230.4	224.9	235.9
MONTSERRADO	2014-08-02	219.0	230.4	224.9	235.9
MONTSERRADO	2014-08-02	219.0	230.4	224.9	235.9
KAILAHUN	2014-08-02	219.0	230.4	224.9	235.9
KAILAHUN	2014-08-02	219.0	230.4	224.9	235.9
WESTERN	2014-08-02	219.0	230.4	224.9	235.9
MONTSERRADO	2014-08-02	219.0	230.4	224.9	235.9
LOFA	2014-08-02	219.0	230.4	224.9	235.9
KAILAHUN	2014-08-02	219.0	230.4	224.9	235.9
MONTSERRADO	2014-08-02	219.0	230.4	224.9	235.9
PORT_LOKO	2014-08-02	219.0	230.4	224.9	235.9
MOYAMBA	2014-08-02	219.0	230.4	224.9	235.9
BONG	2014-08-02	219.0	230.4	224.9	235.9
MARGIBI	2014-08-02	219.0	230.4	224.9	235.9
KAILAHUN	2014-08-03	220.0	231.4	225.9	236.9
KAILAHUN	2014-08-03	220.0	231.4	225.9	236.9
MONTSERRADO	2014-08-03	220.0	231.4	225.9	236.9
KENEMA	2014-08-03	220.0	231.4	225.9	236.9
PORT_LOKO	2014-08-03	220.0	231.4	225.9	236.9
MONTSERRADO	2014-08-03	220.0	231.4	225.9	236.9
MONTSERRADO	2014-08-03	220.0	231.4	225.9	236.9
BOMI	2014-08-03	220.0	231.4	225.9	236.9
MONTSERRADO	2014-08-03	220.0	231.4	225.9	236.9
PORT_LOKO	2014-08-03	220.0	231.4	225.9	236.9
LOFA	2014-08-03	220.0	231.4	225.9	236.9
KENEMA	2014-08-03	220.0	231.4	225.9	236.9
MONTSERRADO	2014-08-03	220.0	231.4	225.9	236.9
LOFA	2014-08-03	220.0	231.4	225.9	236.9
KENEMA	2014-08-03	220.0	231.4	225.9	236.9
LOFA	2014-08-03	220.0	231.4	225.9	236.9
MARGIBI	2014-08-03	220.0	231.4	225.9	236.9
MARGIBI	2014-08-03	220.0	231.4	225.9	236.9
MONTSERRADO	2014-08-03	220.0	231.4	225.9	236.9
MONTSERRADO	2014-08-03	220.0	231.4	225.9	236.9
KAILAHUN	2014-08-03	220.0	231.4	225.9	236.9
MARGIBI	2014-08-03	220.0	231.4	225.9	236.9
PORT_LOKO	2014-08-03	220.0	231.4	225.9	236.9
MACENTA	2014-08-03	220.0	231.4	225.9	236.9
KAILAHUN	2014-08-03	220.0	231.4	225.9	236.9
WESTERN	2014-08-03	220.0	231.4	225.9	236.9
BO	2014-08-03	220.0	231.4	225.9	236.9
GUECKEDOU	2014-08-03	220.0	231.4	225.9	236.9
MARGIBI	2014-08-03	220.0	231.4	225.9	236.9
MONTSERRADO	2014-08-03	220.0	231.4	225.9	236.9
KAILAHUN	2014-08-03	220.0	231.4	225.9	236.9
KENEMA	2014-08-03	220.0	231.4	225.9	236.9
LOFA	2014-08-03	220.0	231.4	225.9	236.9
LOFA	2014-08-03	220.0	231.4	225.9	236.9
KENEMA	2014-08-03	220.0	231.4	225.9	236.9
KAILAHUN	2014-08-03	220.0	231.4	225.9	236.9
MONTSERRADO	2014-08-03	220.0	231.4	225.9	236.9
GUECKEDOU	2014-08-03	220.0	231.4	225.9	236.9
PORT_LOKO	2014-08-03	220.0	231.4	225.9	236.9
KAILAHUN	2014-08-03	220.0	231.4	225.9	236.9
MONTSERRADO	2014-08-03	220.0	231.4	225.9	236.9
MONTSERRADO	2014-08-03	220.0	231.4	225.9	236.9
MARGIBI	2014-08-03	220.0	231.4	225.9	236.9
MARGIBI	2014-08-03	220.0	231.4	225.9	236.9
KENEMA	2014-08-03	220.0	231.4	225.9	236.9
KAILAHUN	2014-08-03	220.0	231.4	225.9	236.9
LOFA	2014-08-03	220.0	231.4	225.9	236.9
LOFA	2014-08-03	220.0	231.4	225.9	236.9
MARGIBI	2014-08-03	220.0	231.4	225.9	236.9
LOFA	2014-08-03	220.0	231.4	225.9	236.9
KAILAHUN	2014-08-03	220.0	231.4	225.9	236.9
BOMI	2014-08-03	220.0	231.4	225.9	236.9
MARGIBI	2014-08-03	220.0	231.4	225.9	236.9
NIMBA	2014-08-03	220.0	231.4	225.9	236.9
KENEMA	2014-08-03	220.0	231.4	225.9	236.9
BOMI	2014-08-03	220.0	231.4	225.9	236.9
KAILAHUN	2014-08-03	220.0	231.4	225.9	236.9
GUECKEDOU	2014-08-03	220.0	231.4	225.9	236.9
MARGIBI	2014-08-03	220.0	231.4	225.9	236.9
KAILAHUN	2014-08-03	220.0	231.4	225.9	236.9
WESTERN	2014-08-03	220.0	231.4	225.9	236.9
KAILAHUN	2014-08-03	220.0	231.4	225.9	236.9
KENEMA	2014-08-03	220.0	231.4	225.9	236.9
PORT_LOKO	2014-08-03	220.0	231.4	225.9	236.9
MONTSERRADO	2014-08-03	220.0	231.4	225.9	236.9
LOFA	2014-08-03	220.0	231.4	225.9	236.9
KAILAHUN	2014-08-03	220.0	231.4	225.9	236.9
KAILAHUN	2014-08-03	220.0	231.4	225.9	236.9
MARGIBI	2014-08-03	220.0	231.4	225.9	236.9
NIMBA	2014-08-03	220.0	231.4	225.9	236.9
LOFA	2014-08-03	220.0	231.4	225.9	236.9
KAILAHUN	2014-08-03	220.0	231.4	225.9	236.9
MONTSERRADO	2014-08-03	220.0	231.4	225.9	236.9
MONTSERRADO	2014-08-03	220.0	231.4	225.9	236.9
LOFA	2014-08-03	220.0	231.4	225.9	236.9
KENEMA	2014-08-03	220.0	231.4	225.9	236.9
BONG	2014-08-03	220.0	231.4	225.9	236.9
[truncated: 25,532 more rows]
