# Supplementary material
Source: ML conference proceedings conference paper supplement (https://proceedings.neurips.cc/paper_files/paper/2022/hash/9d3faa41886997cfc2128b930077fa49-Abstract.html)
Supplement: Supplementary file 1 [file 9d3faa41886997cfc2128b930077fa49-Supplemental-Conference.zip › code/ebola/map/geojson/beyla.geojson]

{"type":"GeometryCollection","geometries":[{"type":"MultiPolygon","coordinates":[[[[-8.9262504,8.2624432],[-8.9264988,8.2630145],[-8.9271499,8.263639],[-8.927593,8.2651205],[-8.9279119,8.2659909],[-8.9276971,8.2663896],[-8.9286841,8.2673265],[-8.9286505,8.2676653],[-8.9280261,8.267971],[-8.9275762,8.2684095],[-8.9277306,8.2686221],[-8.9281268,8.2686022],[-8.9285431,8.2683431],[-8.9289593,8.2682168],[-8.9290399,8.2684826],[-8.9286639,8.2686886],[-8.9284826,8.2690075],[-8.9280395,8.2692401],[-8.9280328,8.2695723],[-8.9282409,8.269765],[-8.9287042,8.2695258],[-8.9289593,8.2690407],[-8.9293085,8.2689278],[-8.9296241,8.2691803],[-8.9295703,8.269466],[-8.9294226,8.27027],[-8.9292548,8.2704693],[-8.9288116,8.2701637],[-8.9280462,8.2704228],[-8.9276031,8.2707085],[-8.9276568,8.2708879],[-8.9280932,8.2707882],[-8.9282073,8.2710474],[-8.9278851,8.2713729],[-8.9280865,8.2717384],[-8.9277642,8.2721968],[-8.9273345,8.2725822],[-8.9271599,8.2731603],[-8.9266899,8.2737118],[-8.9260185,8.2739576],[-8.9251725,8.2742234],[-8.9240646,8.2746686],[-8.9238699,8.2749742],[-8.9241519,8.275426],[-8.9240982,8.2756652],[-8.9234067,8.2756918],[-8.9227889,8.2762765],[-8.9218892,8.2766818],[-8.9216945,8.277014],[-8.9221913,8.3023325],[-8.916106,8.3246116],[-8.901197,8.338159],[-8.8938947,8.3489966],[-8.8847667,8.4007722],[-8.8738132,8.4076951],[-8.8735089,8.4182298],[-8.885071,8.4326769],[-8.8917648,8.4669867],[-8.8975458,8.5292781],[-8.9018056,8.5584643],[-8.9018056,8.568694],[-8.9002842,8.5783216],[-8.8902435,8.6072032],[-8.8904887,8.6167789],[-8.890852,8.6309687],[-8.9158018,8.6345786],[-8.9176274,8.6454078],[-8.914889,8.6532287],[-8.9200615,8.6544319],[-8.9209743,8.6592447],[-8.9188444,8.6640575],[-8.9173231,8.6793976],[-8.9227999,8.6866163],[-8.9176274,8.6941356],[-8.9308898,8.6974131],[-8.9322321,8.6977448],[-8.9316236,8.7175948],[-8.9413601,8.7163918],[-8.9416643,8.7248128],[-8.944707,8.7320306],[-8.9520093,8.7368423],[-8.955052,8.7572917],[-8.9528355,8.7715161],[-8.9224094,8.788355],[-8.8855938,8.8112067],[-8.8353908,8.8511937],[-8.8174394,8.8863666],[-8.7961411,8.9137209],[-8.7219014,8.9383682],[-8.7059928,8.9540833],[-8.7002989,8.9597077],[-8.7018202,8.9837508],[-8.7228142,9.0129009],[-8.7243827,9.0183043],[-8.7238084,9.0192413],[-8.7235286,9.0208452],[-8.7228519,9.0230203],[-8.7225903,9.0237357],[-8.7219237,9.02431],[-8.7216072,9.0247519],[-8.721431,9.0252695],[-8.7218295,9.0263902],[-8.7219471,9.0273158],[-8.7221253,9.0278297],[-8.72219,9.0286811],[-8.7219714,9.0296388],[-8.721457,9.0306458],[-8.7213271,9.0312386],[-8.7213868,9.0319127],[-8.7212072,9.0330633],[-8.7205021,9.0339808],[-8.7201922,9.0345465],[-8.7200297,9.0357196],[-8.7201279,9.0365995],[-8.7200542,9.0372834],[-8.7201572,9.0381723],[-8.7200278,9.03914],[-8.7193461,9.0399126],[-8.7188729,9.0408541],[-8.7184995,9.0409335],[-8.7179054,9.0405951],[-8.7168713,9.0402512],[-8.7155494,9.0400684],[-8.713467,9.040071],[-8.7128846,9.0399409],[-8.7122195,9.0401073],[-8.7114319,9.0405528],[-8.7108592,9.0413069],[-8.7104505,9.0424945],[-8.7101608,9.0427341],[-8.7095036,9.0437434],[-8.7093712,9.0442356],[-8.7094946,9.0445853],[-8.7109245,9.0459803],[-8.7115425,9.0470071],[-8.7123953,9.0482772],[-8.7138146,9.0497208],[-8.7150735,9.0504844],[-8.7162465,9.0507638],[-8.7165625,9.0510169],[-8.7165981,9.0514832],[-8.7169089,9.0530496],[-8.7169886,9.053804],[-8.716755,9.0544279],[-8.7162891,9.0550051],[-8.7159767,9.0550722],[-8.7153024,9.0544725],[-8.7141163,9.053911],[-8.7132276,9.0538174],[-8.7126141,9.0538852],[-8.7120493,9.0540888],[-8.7113491,9.054794],[-8.7110532,9.0552869],[-8.7111753,9.0556186],[-8.7114108,9.0558573],[-8.7116262,9.0562394],[-8.7118286,9.0571057],[-8.7120099,9.0574792],[-8.7126132,9.0579122],[-8.7146277,9.0587953],[-8.7156346,9.0590324],[-8.7163466,9.0588445],[-8.7167652,9.05849],[-8.7170279,9.0576085],[-8.7181952,9.0569286],[-8.7186383,9.0563042],[-8.719362,9.0557212],[-8.7200227,9.0556775],[-8.7202876,9.0558677],[-8.7203468,9.0565147],[-8.7194028,9.0574261],[-8.7189272,9.0582884],[-8.7188431,9.0591344],[-8.7189476,9.0595926],[-8.7192425,9.0597454],[-8.7197272,9.0598394],[-8.7214634,9.0607913],[-8.7217281,9.061173],[-8.7215707,9.0615481],[-8.7206435,9.0622757],[-8.7198036,9.063975],[-8.7192678,9.065767],[-8.7187577,9.0685869],[-8.7188626,9.0688856],[-8.7191696,9.0693075],[-8.7195137,9.0695882],[-8.7195255,9.0698643],[-8.7190726,9.0708797],[-8.7190842,9.0711264],[-8.7196882,9.071371],[-8.7201019,9.0716716],[-8.7213243,9.0719256],[-8.7221084,9.0715092],[-8.7227086,9.071499],[-8.7233402,9.071822],[-8.7234901,9.0727268],[-8.7235284,9.0735294],[-8.7229655,9.0738951],[-8.7217877,9.0753141],[-8.7216891,9.075759],[-8.7219858,9.0768728],[-8.7220567,9.0787297],[-8.7216991,9.0790536],[-8.7210602,9.0792155],[-8.7207954,9.0790335],[-8.7200387,9.0767155],[-8.7194496,9.0754423],[-8.7190166,9.0749569],[-8.7182339,9.074384],[-8.7179027,9.0744863],[-8.7177691,9.0747657],[-8.7182382,9.0757022],[-8.7184516,9.0765656],[-8.7180887,9.0782614],[-8.717822,9.0790035],[-8.7179134,9.0794452],[-8.7189305,9.0814641],[-8.7196852,9.0835042],[-8.7196427,9.0839596],[-8.719502,9.0842362],[-8.7178662,9.0850115],[-8.7169916,9.0851795],[-8.7165027,9.0855368],[-8.7163694,9.08593],[-8.7165601,9.0862167],[-8.7182115,9.0873197],[-8.7184871,9.0877094],[-8.7186311,9.0882105],[-8.7184768,9.0899718],[-8.7185332,9.0912617],[-8.718412,9.0928909],[-8.7186176,9.0937813],[-8.7185628,9.0944948],[-8.7182048,9.0950845],[-8.717206,9.0956614],[-8.7158558,9.0959406],[-8.7147206,9.0967802],[-8.7147055,9.0971487],[-8.7155139,9.0977151],[-8.7156853,9.0982197],[-8.7157276,9.0989536],[-8.7155741,9.0997235],[-8.7154851,9.1007015],[-8.7151655,9.1013173],[-8.7136891,9.1013683],[-8.7093949,9.1026783],[-8.7082899,9.1042122],[-8.707912,9.1044793],[-8.7072903,9.1046587],[-8.7070165,9.1050969],[-8.7068914,9.105535],[-8.7072712,9.1062732],[-8.7088674,9.1063092],[-8.7092296,9.1061055],[-8.709923,9.105214],[-8.7104703,9.1047496],[-8.7113697,9.103794],[-8.7118907,9.1036199],[-8.7124681,9.1039368],[-8.7128047,9.1044491],[-8.7134821,9.1049813],[-8.7135669,9.1055266],[-8.7129336,9.1066792],[-8.7127438,9.1088283],[-8.7126056,9.1097927],[-8.7131814,9.1116191],[-8.7132041,9.1120783],[-8.7130332,9.1128561],[-8.7126676,9.1138697],[-8.7126507,9.1145859],[-8.7131471,9.1155755],[-8.7132237,9.1193601],[-8.7128298,9.1228995],[-8.7127322,9.1236086],[-8.7128422,9.1243845],[-8.7126008,9.1262072],[-8.7112167,9.1262601],[-8.7107026,9.1270222],[-8.7099427,9.1300955],[-8.7090087,9.1355397],[-8.7083538,9.1377713],[-8.7078603,9.1400063],[-8.7074685,9.140763],[-8.7076446,9.1419797],[-8.7077088,9.1424236],[-8.707399,9.1444552],[-8.7053176,9.1445823],[-8.7046587,9.1459547],[-8.7040059,9.1468573],[-8.7021589,9.147999],[-8.701406,9.149463],[-8.7010909,9.1509019],[-8.6995546,9.1522242],[-8.6980577,9.1545187],[-8.6974668,9.1580578],[-8.6953003,9.1603134],[-8.694867,9.1615967],[-8.6944336,9.1623356],[-8.692661,9.1629967],[-8.6920307,9.1647857],[-8.6916762,9.1675857],[-8.6923459,9.1696079],[-8.6921489,9.1706579],[-8.6907308,9.1719412],[-8.6873431,9.1722134],[-8.6861613,9.1725245],[-8.682813,9.1729912],[-8.6807646,9.1722912],[-8.6798192,9.1712801],[-8.6772981,9.1719023],[-8.676786,9.1728745],[-8.6775344,9.1736134],[-8.6795828,9.1737301],[-8.6810797,9.1747023],[-8.6809616,9.1777355],[-8.6795434,9.1781244],[-8.6775738,9.1761411],[-8.6748952,9.1765689],[-8.6731619,9.1760245],[-8.6715074,9.17618],[-8.6693803,9.1773855],[-8.6679622,9.1767633],[-8.6677258,9.1772689],[-8.6682379,9.17828],[-8.670562,9.1801466],[-8.6711529,9.1812743],[-8.6708378,9.1822465],[-8.6693015,9.1811965],[-8.6674501,9.1811965],[-8.6671743,9.1831798],[-8.6665834,9.1852797],[-8.6651653,9.1869129],[-8.6653229,9.1882351],[-8.6648896,9.1897905],[-8.6641805,9.1906849],[-8.6624867,9.1910349],[-8.6605564,9.191346],[-8.6598868,9.1927848],[-8.6572475,9.1944958],[-8.6567354,9.1957012],[-8.6575233,9.1962068],[-8.6597686,9.1949235],[-8.6615019,9.1949235],[-8.6624867,9.1963623],[-8.660911,9.1983455],[-8.6581141,9.1998231],[-8.6575233,9.200873],[-8.6579566,9.2019229],[-8.6579566,9.2035172],[-8.6573263,9.2073668],[-8.6579172,9.2090777],[-8.6589808,9.2097387],[-8.6601231,9.2109053],[-8.6609898,9.2102054],[-8.6621715,9.2104387],[-8.6622897,9.2120329],[-8.6635896,9.2119163],[-8.6648108,9.2107497],[-8.6669774,9.2117218],[-8.6673713,9.2125384],[-8.6666622,9.2140938],[-8.6657562,9.2154547],[-8.6643775,9.2158435],[-8.6626442,9.2164657],[-8.6607928,9.2184487],[-8.6595323,9.2209761],[-8.659611,9.2230369],[-8.6588626,9.2238535],[-8.6577202,9.2245922],[-8.6551203,9.2232702],[-8.6547658,9.2236979],[-8.6554749,9.2251755],[-8.6552779,9.2266141],[-8.6542537,9.2287138],[-8.6529538,9.2295692],[-8.6509448,9.2282472],[-8.6498024,9.2280528],[-8.6482267,9.2292192],[-8.6484631,9.2309689],[-8.6477934,9.2321354],[-8.6479116,9.2340795],[-8.6498812,9.2366068],[-8.6499994,9.238162],[-8.6485813,9.2419724],[-8.6453377,9.2442],[-8.6437893,9.2437327],[-8.642865,9.2438468],[-8.6420693,9.2443676],[-8.6411712,9.2465656],[-8.6405769,9.2469655],[-8.6402324,9.2474485],[-8.6403028,9.2477381],[-8.6420903,9.2488894],[-8.6425098,9.2494246],[-8.6425013,9.2500827],[-8.6429527,9.252004],[-8.6442152,9.2541415],[-8.6451799,9.255024],[-8.6457713,9.2558455],[-8.6464061,9.2563607],[-8.6469618,9.257127],[-8.6470096,9.2577292],[-8.6467747,9.2581361],[-8.6456815,9.2588343],[-8.6454249,9.2592033],[-8.6453446,9.2597006],[-8.6466401,9.2603295],[-8.6480616,9.2602187],[-8.648669,9.2605934],[-8.6496759,9.2613977],[-8.6499197,9.261951],[-8.6498985,9.2630576],[-8.6499968,9.2639486],[-8.6498634,9.2643709],[-8.6492953,9.2649626],[-8.648321,9.2655605],[-8.6478386,9.2655504],[-8.6473584,9.2648781],[-8.6455441,9.2638878],[-8.6440291,9.2634191],[-8.6431134,9.2639101],[-8.6424692,9.2645603],[-8.6412483,9.2657239],[-8.6404573,9.2662655],[-8.6384224,9.2670166],[-8.6373489,9.2671507],[-8.6360425,9.2671057],[-8.6349285,9.2673621],[-8.633174,9.2683734],[-8.6328444,9.2694669],[-8.6327511,9.2707256],[-8.6331227,9.2712289],[-8.6334941,9.271365],[-8.6349801,9.2713033],[-8.6365995,9.2721641],[-8.6367745,9.2725975],[-8.6358226,9.2746339],[-8.6348366,9.2759935],[-8.6330466,9.2759524],[-8.6323287,9.2769664],[-8.631949,9.277824],[-8.6320081,9.2790346],[-8.6328693,9.2803425],[-8.6331872,9.2813751],[-8.6358401,9.2837287],[-8.6375076,9.2858647],[-8.6374343,9.2866491],[-8.6367344,9.2880968],[-8.6344809,9.2902135],[-8.6341165,9.2908769],[-8.6338108,9.2919933],[-8.6328102,9.2928235],[-8.6317441,9.2929185],[-8.6309165,9.2927495],[-8.6299191,9.2919596],[-8.6297525,9.2912832],[-8.6301163,9.2885343],[-8.6306341,9.2879688],[-8.6312145,9.2871435],[-8.6315755,9.2861958],[-8.6313613,9.2854571],[-8.6308211,9.2849397],[-8.6303417,9.2849977],[-8.6294947,9.2857309],[-8.6282877,9.2858842],[-8.6273826,9.2868131],[-8.6262178,9.2874863],[-8.6254352,9.2876109],[-8.6249659,9.2878405],[-8.6246164,9.2884842],[-8.6242782,9.2895708],[-8.6236645,9.2909107],[-8.6226841,9.2924603],[-8.6214892,9.2946524],[-8.6212476,9.2957856],[-8.6212153,9.2964513],[-8.6215527,9.2977287],[-8.6222716,9.2990072],[-8.6231818,9.3008412],[-8.6234844,9.3018469],[-8.6233507,9.3022266],[-8.6229196,9.3024755],[-8.622476,9.3024893],[-8.6217973,9.3022407],[-8.6209619,9.3016148],[-8.6203681,9.3006217],[-8.6198244,9.2999066],[-8.6189248,9.2996878],[-8.6183226,9.2998389],[-8.6177827,9.3011016],[-8.6170169,9.3018527],[-8.6146039,9.3033454],[-8.6140242,9.3040316],[-8.6131528,9.3046994],[-8.6108422,9.3058302],[-8.61078,9.3065344],[-8.6113313,9.3081884],[-8.6113521,9.3093748],[-8.6117549,9.3126128],[-8.6121506,9.3135877],[-8.6123458,9.3148343],[-8.6122361,9.3157438],[-8.6118133,9.3167088],[-8.6107711,9.3179218],[-8.6105509,9.3185162],[-8.6104308,9.3212102],[-8.6114943,9.3228225],[-8.6114352,9.324344],[-8.6117755,9.3246824],[-8.6123864,9.3244674],[-8.6135314,9.3232372],[-8.6141191,9.322699],[-8.6147019,9.3226514],[-8.6153536,9.3229125],[-8.6158105,9.3234922],[-8.616092,9.3242447],[-8.6170934,9.3252059],[-8.617226,9.3256535],[-8.6171894,9.3260269],[-8.6161393,9.3275769],[-8.6150407,9.3288888],[-8.6149662,9.3293484],[-8.6151574,9.3295358],[-8.6160062,9.3295191],[-8.6177092,9.329125],[-8.6202232,9.3290649],[-8.6220165,9.3284812],[-8.6225259,9.3285646],[-8.622619,9.3288929],[-8.6223393,9.3300915],[-8.6216273,9.33116],[-8.6207657,9.3318314],[-8.6203737,9.3327252],[-8.620141,9.3338699],[-8.6202198,9.3350877],[-8.6205593,9.336098],[-8.6217193,9.3385728],[-8.6217471,9.3394373],[-8.6214868,9.3398134],[-8.6207719,9.3399532],[-8.6198816,9.3404203],[-8.6191493,9.3413143],[-8.6188115,9.3421339],[-8.6186997,9.3429966],[-8.6189887,9.3437725],[-8.6194497,9.3442117],[-8.6203491,9.3444962],[-8.621549,9.3443878],[-8.6225419,9.3434945],[-8.6229686,9.3433299],[-8.6235267,9.3435853],[-8.6244316,9.3449716],[-8.6248936,9.3460557],[-8.6248921,9.3472757],[-8.6251271,9.3480346],[-8.6262788,9.3493675],[-8.6262412,9.349918],[-8.6260471,9.3502333],[-8.6257125,9.3502012],[-8.6247734,9.3497664],[-8.6228065,9.3495917],[-8.6224054,9.3497168],[-8.6219793,9.3502496],[-8.6217157,9.3507838],[-8.6217968,9.3537993],[-8.6220784,9.3562153],[-8.6220305,9.3572647],[-8.6215949,9.3588434],[-8.6213722,9.3602119],[-8.6215762,9.3612631],[-8.6216989,9.3627653],[-8.621301,9.364404],[-8.6206839,9.3659974],[-8.6192714,9.3679676],[-8.6193982,9.3688353],[-8.6197754,9.3700055],[-8.6209776,9.371356],[-8.6212184,9.3720635],[-8.6212463,9.3728574],[-8.6209263,9.3743091],[-8.619695,9.3758783],[-8.6196377,9.3766303],[-8.6198958,9.3772323],[-8.6205923,9.3777908],[-8.6216479,9.377819],[-8.6226472,9.3773156],[-8.6233879,9.3759217],[-8.6239535,9.3756527],[-8.6245184,9.3756855],[-8.6252086,9.3760394],[-8.6264496,9.3774834],[-8.6267638,9.3781424],[-8.6275762,9.3791962],[-8.627994,9.380046],[-8.6279787,9.3809515],[-8.6272996,9.3826972],[-8.6267681,9.3833217],[-8.6260683,9.3835571],[-8.624932,9.3834636],[-8.624184,9.3835861],[-8.6225925,9.3841764],[-8.6215162,9.384249],[-8.6203961,9.3844697],[-8.6195541,9.3849684],[-8.6183801,9.3862022],[-8.6180867,9.3868327],[-8.6181441,9.3872962],[-8.6184988,9.3875645],[-8.6195862,9.3875546],[-8.620496,9.3882514],[-8.6213752,9.3893948],[-8.6220074,9.3912467],[-8.6232749,9.3924331],[-8.6243311,9.3935126],[-8.6247172,9.3946167],[-8.6252265,9.3952555],[-8.6259818,9.3956186],[-8.6273268,9.3954546],[-8.6290162,9.395519],[-8.6303115,9.3961266],[-8.6307174,9.3959308],[-8.6307518,9.3948641],[-8.6310805,9.3944089],[-8.631525,9.3943513],[-8.6319987,9.3950677],[-8.6332951,9.3964203],[-8.6342596,9.3977171],[-8.63565,9.3993346],[-8.6364768,9.4006047],[-8.6363164,9.4011912],[-8.6351392,9.4011464],[-8.6333795,9.4012374],[-8.6322339,9.4007184],[-8.6314264,9.3999337],[-8.6310639,9.3987225],[-8.6306792,9.398262],[-8.6298164,9.3980099],[-8.6291415,9.3981655],[-8.6288939,9.3984519],[-8.6292158,9.3988884],[-8.6294374,9.3998252],[-8.629324,9.4006877],[-8.6286016,9.4018608],[-8.6282425,9.4026692],[-8.6278801,9.4049338],[-8.6279749,9.4060799],[-8.627939,9.4076431],[-8.6277495,9.4094534],[-8.6272569,9.4098103],[-8.6268271,9.4096647],[-8.6263358,9.4089436],[-8.6247672,9.407654],[-8.6240977,9.4075089],[-8.6238469,9.4076811],[-8.6237088,9.4080261],[-8.6238543,9.4083769],[-8.6243334,9.4085946],[-8.6249431,9.4090552],[-8.625243,9.4097987],[-8.6245886,9.4108939],[-8.6245188,9.4118698],[-8.624846,9.4123698],[-8.6253959,9.4131221],[-8.6255433,9.4160921],[-8.6258467,9.4168582],[-8.6265102,9.4175649],[-8.6281145,9.4190358],[-8.6299499,9.4213779],[-8.630784,9.4229134],[-8.6309019,9.4236721],[-8.6305313,9.424968],[-8.6302833,9.4266754],[-8.630397,9.4282288],[-8.6307521,9.4292789],[-8.6316474,9.4303978],[-8.6319853,9.4312117],[-8.6318764,9.4319066],[-8.6311886,9.4330798],[-8.6306639,9.4333854],[-8.6297882,9.4331047],[-8.6289338,9.4331316],[-8.628394,9.4334564],[-8.626889,9.4352791],[-8.6260151,9.4368919],[-8.6249339,9.4379208],[-8.6244255,9.4387809],[-8.6248156,9.4404475],[-8.6256391,9.4413489],[-8.6270205,9.443496],[-8.6289725,9.4454945],[-8.6301707,9.4478435],[-8.6303874,9.4491832],[-8.6308342,9.4499573],[-8.6344651,9.4534944],[-8.6365183,9.4551058],[-8.6365716,9.4556188],[-8.6363692,9.4561722],[-8.6350747,9.4584043],[-8.6340365,9.4582869],[-8.6323389,9.458519],[-8.6304135,9.459126],[-8.6284668,9.4600964],[-8.6279733,9.4610761],[-8.6269267,9.4637134],[-8.6268615,9.4643575],[-8.6271997,9.4649189],[-8.6280702,9.4671602],[-8.6282021,9.4687173],[-8.6278773,9.469339],[-8.6267402,9.4699203],[-8.6243809,9.4704847],[-8.619979,9.469177],[-8.6191559,9.4692103],[-8.6185419,9.4693691],[-8.6182937,9.4697382],[-8.6182637,9.4702417],[-8.6188665,9.472466],[-8.6196204,9.4744075],[-8.6208017,9.4761783],[-8.6223836,9.4768919],[-8.6227291,9.4774707],[-8.6225674,9.4781212],[-8.621823,9.4792204],[-8.6215241,9.4800413],[-8.6215735,9.4812641],[-8.6218502,9.4829801],[-8.6217852,9.4850308],[-8.6212818,9.4862582],[-8.6204692,9.4877544],[-8.6190542,9.4893179],[-8.6185283,9.4905953],[-8.6185298,9.4917829],[-8.6183145,9.4923106],[-8.6169407,9.4932083],[-8.6158942,9.4933255],[-8.6151242,9.4935934],[-8.6053695,9.4624711],[-8.5910692,9.4543678],[-8.5843755,9.4339584],[-8.577986,9.4399613],[-8.5576005,9.4432628],[-8.5539494,9.4759763],[-8.5414747,9.483779],[-8.5329554,9.4726751],[-8.522002,9.4870802],[-8.5140912,9.4951827],[-8.4970526,9.489781],[-8.4833609,9.5110873],[-8.4937057,9.531492],[-8.4845779,9.5413939],[-8.4593243,9.5401936],[-8.4365047,9.5296916],[-8.3917783,9.563897],[-8.3537457,9.5785982],[-8.2426905,9.5854986],[-8.1436061,9.5846699],[-8.1431412,9.5842614],[-8.1427554,9.5843363],[-8.1425046,9.5849603],[-8.1421222,9.5851275],[-8.1408283,9.5850385],[-8.1401924,9.5852037],[-8.139477,9.5850859],[-8.1389599,9.5846151],[-8.1385621,9.5837204],[-8.1386988,9.5831404],[-8.1386328,9.5823923],[-8.1384081,9.5819149],[-8.1377229,9.5797787],[-8.1367544,9.5791751],[-8.1365475,9.5788332],[-8.1367837,9.5777795],[-8.1363247,9.5770589],[-8.1351171,9.5765809],[-8.1348595,9.5752153],[-8.1351877,9.5748544],[-8.1364753,9.5742032],[-8.136798,9.5737434],[-8.1363867,9.5735002],[-8.1362305,9.5732724],[-8.1363441,9.572981],[-8.1366457,9.5728349],[-8.1371895,9.5723177],[-8.1372459,9.5719138],[-8.1369055,9.5716015],[-8.1371593,9.5706621],[-8.1371233,9.5703867],[-8.1368221,9.5699798],[-8.1363243,9.569954],[-8.1355759,9.5703772],[-8.1353693,9.5704057],[-8.1351583,9.5700455],[-8.1348799,9.569104],[-8.1348801,9.5680799],[-8.1346695,9.5673271],[-8.1348267,9.5664503],[-8.1346109,9.5653431],[-8.1347723,9.5651319],[-8.1355244,9.5650975],[-8.1360044,9.5648695],[-8.1364567,9.564077],[-8.1367564,9.5632135],[-8.1370992,9.5624222],[-8.1374382,9.5623088],[-8.1378707,9.5625073],[-8.1380492,9.5631177],[-8.1383727,9.5631713],[-8.1390194,9.5622731],[-8.1403907,9.5627059],[-8.1415547,9.5623911],[-8.1426152,9.5624874],[-8.1430363,9.5621636],[-8.143016,9.5613493],[-8.1432263,9.5605872],[-8.1431134,9.5600695],[-8.1422744,9.5597116],[-8.1418936,9.5591823],[-8.1421393,9.5584924],[-8.142059,9.557904],[-8.1414995,9.5574874],[-8.140317,9.5575514],[-8.139672,9.5570718],[-8.1395464,9.5563354],[-8.1397452,9.5552345],[-8.1403614,9.5545455],[-8.1415121,9.5548576],[-8.1418773,9.5547683],[-8.1420385,9.5543483],[-8.1423869,9.5539377],[-8.1425417,9.55294],[-8.1420545,9.5525684],[-8.1419399,9.5521521],[-8.1425351,9.5517045],[-8.1435785,9.5501735],[-8.1437533,9.5496013],[-8.143412,9.5489903],[-8.1422911,9.5481199],[-8.1401591,9.5470011],[-8.1399081,9.546392],[-8.1400461,9.5458039],[-8.1407349,9.5453409],[-8.1407553,9.5449584],[-8.1404897,9.5447311],[-8.1399625,9.5447623],[-8.1397057,9.5454054],[-8.1390753,9.5458647],[-8.1385269,9.5458012],[-8.1376467,9.545195],[-8.1375541,9.5444429],[-8.1368011,9.5430494],[-8.1371339,9.5425881],[-8.1377115,9.5422409],[-8.1384057,9.5420146],[-8.1393411,9.5419709],[-8.1396053,9.5414553],[-8.1396537,9.5411003],[-8.1392135,9.5407283],[-8.1387157,9.5406534],[-8.1384691,9.5412078],[-8.1381367,9.5415422],[-8.1377069,9.5415836],[-8.1374879,9.5413666],[-8.1376143,9.5405857],[-8.1372743,9.5401992],[-8.1365813,9.5401749],[-8.1364223,9.5398153],[-8.1377207,9.5392431],[-8.1385725,9.5388605],[-8.1392299,9.5384737],[-8.1395297,9.5378346],[-8.139237,9.5375152],[-8.1387931,9.5374775],[-8.1385869,9.5372542],[-8.1388368,9.5369525],[-8.1389903,9.5364987],[-8.1388539,9.5348832],[-8.1386268,9.5343925],[-8.1379965,9.5339992],[-8.1378429,9.533657],[-8.1380083,9.5333327],[-8.1382091,9.5332485],[-8.1383917,9.5334996],[-8.1386875,9.5337906],[-8.1389575,9.5345638],[-8.1392316,9.5346796],[-8.1397619,9.5343445],[-8.1395743,9.5335469],[-8.1392999,9.5335988],[-8.1390781,9.5334659],[-8.1392275,9.5329508],[-8.1402811,9.53233],[-8.1404859,9.5317402],[-8.1403511,9.5307649],[-8.1401573,9.5299827],[-8.1395431,9.5294629],[-8.1389708,9.5288821],[-8.1387723,9.5281854],[-8.1383849,9.5279122],[-8.137487,9.5278535],[-8.1369363,9.5280639],[-8.1368605,9.5285392],[-8.1370513,9.5299002],[-8.1366751,9.5303513],[-8.1360832,9.5304172],[-8.135361,9.5301996],[-8.1344984,9.5296021],[-8.1334034,9.5278058],[-8.1330568,9.5270132],[-8.1320268,9.5260984],[-8.1314242,9.5257951],[-8.1302069,9.5262977],[-8.1294567,9.5262965],[-8.1284724,9.5258834],[-8.127822,9.5251034],[-8.1272269,9.524857],[-8.1253769,9.5243905],[-8.124261,9.523974],[-8.1241833,9.5238013],[-8.1243314,9.5235954],[-8.1244846,9.523206],[-8.12427,9.522918],[-8.1233321,9.5226659],[-8.1232546,9.5222751],[-8.1239191,9.5208491],[-8.1238951,9.520449],[-8.1240872,9.5203936],[-8.1246763,9.5206001],[-8.1263295,9.5210643],[-8.126737,9.5207935],[-8.126363,9.520124],[-8.1257538,9.519718],[-8.1256809,9.5193034],[-8.1260207,9.5183874],[-8.1264704,9.5185389],[-8.1270845,9.5185438],[-8.1276013,9.5180947],[-8.127615,9.517754],[-8.1270383,9.5173136],[-8.1265352,9.5175081],[-8.1261611,9.5170106],[-8.1257298,9.5169928],[-8.1255735,9.5166999],[-8.1255687,9.5163651],[-8.1262267,9.5160803],[-8.1266202,9.5150614],[-8.1271202,9.5145493],[-8.1275949,9.5142682],[-8.1277949,9.5146147],[-8.1280031,9.51487],[-8.1283901,9.5146509],[-8.1284179,9.514189],[-8.1273149,9.5137228],[-8.1271274,9.5131589],[-8.1273378,9.5127315],[-8.1278495,9.5119971],[-8.1283731,9.511658],[-8.1292862,9.5113793],[-8.1293883,9.5107873],[-8.1292699,9.5103822],[-8.1286189,9.5102034],[-8.1280344,9.5104974],[-8.1276489,9.5104838],[-8.1275082,9.5102195],[-8.1277782,9.5097045],[-8.1277186,9.5091065],[-8.1281845,9.5083122],[-8.1285977,9.5081017],[-8.128742,9.5079582],[-8.1287763,9.5076485],[-8.1284741,9.5071475],[-8.1279602,9.5067963],[-8.1274396,9.506779],[-8.126102,9.5071579],[-8.125289,9.50764],[-8.1245926,9.5076135],[-8.1242089,9.5073147],[-8.1240851,9.5068584],[-8.124443,9.5063787],[-8.1241101,9.5053529],[-8.1243289,9.5045252],[-8.1241147,9.5039351],[-8.1244751,9.5038274],[-8.1240581,9.5025699],[-8.1240791,9.5021389],[-8.1243991,9.5019349],[-8.1241841,9.5015319],[-8.1231581,9.5014679],[-8.1216801,9.5000839],[-8.1216721,9.4994819],[-8.1222121,9.4992779],[-8.1224671,9.4986509],[-8.1226871,9.4971029],[-8.121292,9.4962719],[-8.120098,9.4957049],[-8.118591,9.4946629],[-8.1186251,9.4935579],[-8.117864,9.4932219],[-8.1177091,9.4920989],[-8.1170571,9.4911679],[-8.1180511,9.4909229],[-8.1184271,9.4898959],[-8.1181057,9.4882479],[-8.1180971,9.488204],[-8.1177731,9.4873779],[-8.1168751,9.4871059],[-8.1165581,9.4871399],[-8.1160942,9.4873007],[-8.1161181,9.4876229],[-8.116869,9.4884869],[-8.1164221,9.4885409],[-8.1158901,9.4882839],[-8.1148511,9.4876849],[-8.1146971,9.4872849],[-8.1147721,9.4867089],[-8.1147381,9.4865939],[-8.1142961,9.486163],[-8.1143631,9.4855809],[-8.1156601,9.4843869],[-8.1152401,9.4842549],[-8.1148841,9.4839539],[-8.1148021,9.4840109],[-8.1148661,9.4842649],[-8.1145031,9.4843919],[-8.1143221,9.4843209],[-8.1141071,9.4839209],[-8.1139284,9.483267],[-8.1139571,9.4825849],[-8.1137611,9.4819809],[-8.1131121,9.4811489],[-8.1125291,9.4820859],[-8.1117761,9.4814579],[-8.1114091,9.4810279],[-8.1112391,9.4804229],[-8.110709,9.4805569],[-8.1101151,9.4813259],[-8.1091641,9.4808539],[-8.1087771,9.4803559],[-8.1085155,9.4798122],[-8.1086831,9.4794589],[-8.1079371,9.4783851],[-8.1076711,9.4782219],[-8.1076131,9.4780389],[-8.1077901,9.4778059],[-8.1077231,9.4775649],[-8.1070301,9.4778959],[-8.106699,9.4776909],[-8.1059791,9.4768859],[-8.1050851,9.4762939],[-8.1049681,9.47524],[-8.1046141,9.4742599],[-8.1049361,9.4735909],[-8.105843,9.4728769],[-8.1060191,9.4724829],[-8.1059681,9.4721639],[-8.1057121,9.4718779],[-8.1049601,9.4714289],[-8.103727,9.4699739],[-8.102299,9.4695019],[-8.1017981,9.4691409],[-8.1012161,9.4680089],[-8.1017161,9.4676239],[-8.1015951,9.4665539],[-8.1021071,9.4662859],[-8.1028201,9.4654999],[-8.102967,9.4644309],[-8.1026871,9.4629519],[-8.102079,9.4616649],[-8.1009671,9.4611989],[-8.100185,9.4617409],[-8.1001711,9.4630629],[-8.097874,9.4626509],[-8.0977441,9.4619829],[-8.0977031,9.4610469],[-8.0974441,9.4602659],[-8.0957641,9.4583349],[-8.0958371,9.4577959],[-8.0963831,9.4578289],[-8.0967471,9.4563379],[-8.0965091,9.4560359],[-8.095226,9.4563159],[-8.09507,9.4559909],[-8.095105,9.4556239],[-8.0949501,9.4554629],[-8.094633,9.4558069],[-8.094177,9.4556169],[-8.093907,9.4554349],[-8.0936521,9.4554139],[-8.091896,9.4545683],[-8.0920614,9.4529979],[-8.090302,9.4514549],[-8.0901271,9.4507179],[-8.089957,9.4494249],[-8.089696,9.4485799],[-8.0895911,9.4478449],[-8.089172,9.4465239],[-8.088319,9.4455719],[-8.087664,9.4446089],[-8.08732,9.4434579],[-8.0870081,9.4427479],[-8.086214,9.4424389],[-8.0856941,9.440939],[-8.0847131,9.43985],[-8.0838571,9.439588],[-8.0831051,9.439166],[-8.0822251,9.438942],[-8.0816391,9.439295],[-8.0808771,9.439204],[-8.0802991,9.438768],[-8.0798591,9.438066],[-8.0784561,9.4377],[-8.0777331,9.437372],[-8.0772011,9.435882],[-8.0773051,9.435236],[-8.0771371,9.434942],[-8.0763151,9.434594],[-8.0758071,9.434252],[-8.0753961,9.433553],[-8.0747371,9.433697],[-8.0743011,9.433923],[-8.0739291,9.433855],[-8.0735321,9.433463],[-8.0734801,9.432372],[-8.0727691,9.431831],[-8.0726511,9.431412],[-8.0728621,9.430221],[-8.0714991,9.428138],[-8.0708311,9.427587],[-8.0703891,9.427134],[-8.0699021,9.426399],[-8.0693771,9.425971],[-8.0683601,9.425472],[-8.0680531,9.425204],[-8.0676961,9.424762],[-8.0671941,9.424478],[-8.0665231,9.424281],[-8.0658901,9.424558],[-8.0655171,9.425057],[-8.0654681,9.425757],[-8.0653401,9.426095],[-8.0647611,9.426289],[-8.0638081,9.425993],[-8.0633551,9.425319],[-8.0623291,9.424103],[-8.0619561,9.423849],[-8.0607671,9.424115],[-8.0599031,9.422499],[-8.0589021,9.421564],[-8.0582451,9.421062],[-8.0576301,9.420756],[-8.0570971,9.421039],[-8.0567471,9.421115],[-8.0565071,9.420041],[-8.0551681,9.420309],[-8.0549341,9.420042],[-8.0553141,9.418906],[-8.0553491,9.417801],[-8.0547631,9.416908],[-8.0538071,9.416022],[-8.0527561,9.415567],[-8.0515031,9.415454],[-8.0505041,9.416338],[-8.0494621,9.416434],[-8.0489191,9.415916],[-8.0487041,9.415087],[-8.0477161,9.414251],[-8.0466721,9.414177],[-8.0464581,9.413995],[-8.0467651,9.413392],[-8.0465941,9.412986],[-8.0459171,9.412549],[-8.0451041,9.411385],[-8.0449661,9.410836],[-8.0454021,9.410237],[-8.0455321,9.409832],[-8.0450691,9.409308],[-8.0439561,9.408863],[-8.0433231,9.408392],[-8.0434851,9.407934],[-8.0428531,9.407689],[-8.0422911,9.407632],[-8.0419331,9.407525],[-8.0416481,9.407159],[-8.0409911,9.407287],[-8.0406761,9.40697],[-8.0398271,9.40747],[-8.0389971,9.407553],[-8.0386221,9.407154],[-8.0386181,9.406656],[-8.0381181,9.406253],[-8.0378111,9.406125],[-8.0376801,9.405947],[-8.0382021,9.405359],[-8.0378901,9.404097],[-8.0378791,9.403377],[-8.0378151,9.402711],[-8.0376481,9.402112],[-8.0368911,9.401124],[-8.0360141,9.399761],[-8.0351921,9.399103],[-8.0354061,9.398615],[-8.0360781,9.39837],[-8.0359261,9.396462],[-8.0350851,9.395482],[-8.0340071,9.395057],[-8.0331441,9.395008],[-8.0319131,9.395354],[-8.0301521,9.396306],[-8.0287251,9.396354],[-8.0275291,9.396264],[-8.0259651,9.396711],[-8.0239321,9.397384],[-8.0221381,9.397908],[-8.0211561,9.397217],[-8.0202391,9.396796],[-8.0188991,9.395941],[-8.0177711,9.395369],[-8.0164681,9.395199],[-8.0152051,9.395541],[-8.0132531,9.395963],[-8.0126521,9.396642],[-8.0125021,9.396982],[-8.0119311,9.397715],[-8.0105521,9.398777],[-8.0096791,9.39963],[-8.0089741,9.400153],[-8.0082841,9.400865],[-8.0073031,9.401583],[-8.0057781,9.403104],[-8.0050311,9.403091],[-8.0034311,9.402754],[-8.0018791,9.402295],[-8.0002901,9.401565],[-7.9987911,9.400137],[-7.9966731,9.39821],[-7.9958081,9.398248],[-7.9949351,9.398465],[-7.9943541,9.398774],[-7.9936691,9.399007],[-7.9931191,9.399458],[-7.9921871,9.399587],[-7.9915731,9.3992],[-7.9901341,9.399469],[-7.9893681,9.399518],[-7.9879861,9.399271],[-7.9875311,9.399395],[-7.9866291,9.398726],[-7.9859101,9.398427],[-7.9854661,9.398186],[-7.9848861,9.398068],[-7.9843721,9.398069],[-7.9838961,9.398162],[-7.9826941,9.398686],[-7.9817421,9.398876],[-7.9811471,9.398733],[-7.9799581,9.398757],[-7.9792911,9.399138],[-7.9781731,9.399542],[-7.9774351,9.399518],[-7.9767451,9.399114],[-7.9754131,9.398543],[-7.9748601,9.398513],[-7.9681361,9.400767],[-7.9650081,9.402765],[-7.9577151,9.408501],[-7.9548451,9.410089],[-7.9510501,9.410787],[-7.9491781,9.411202],[-7.9467361,9.411983],[-7.9437251,9.412686],[-7.9419431,9.413001],[-7.9386771,9.413915],[-7.9369651,9.414198],[-7.9340311,9.414427],[-7.9275971,9.413496],[-7.9259521,9.413196],[-7.9250191,9.413193],[-7.9239871,9.413504],[-7.9231681,9.414274],[-7.9224401,9.41513],[-7.9221091,9.41571],[-7.9210661,9.416845],[-7.9205711,9.417994],[-7.9205151,9.419181],[-7.9188601,9.420348],[-7.9178841,9.421205],[-7.9170041,9.421681],[-7.9163381,9.421968],[-7.9151631,9.421732],[-7.9143261,9.421079],[-7.9126501,9.42051],[-7.9106491,9.42021],[-7.9090591,9.420321],[-7.9084081,9.420255],[-7.9076741,9.420333],[-7.9070741,9.420614],[-7.9067711,9.421187],[-7.9048491,9.420945],[-7.9041231,9.42102],[-7.9037181,9.420583],[-7.9035061,9.420891],[-7.9018381,9.420425],[-7.9013281,9.420526],[-7.9011801,9.420705],[-7.8997371,9.4205],[-7.8994691,9.420718],[-7.8993211,9.421042],[-7.8988621,9.42094],[-7.8978731,9.421014],[-7.8973501,9.420943],[-7.8967071,9.421324],[-7.8960331,9.421854],[-7.8946371,9.421157],[-7.8928501,9.420612],[-7.8927211,9.420247],[-7.8921861,9.419872],[-7.8909761,9.419886],[-7.8899261,9.419444],[-7.8880221,9.419515],[-7.8870901,9.419183],[-7.8860341,9.419299],[-7.8855101,9.419448],[-7.8849751,9.420079],[-7.8845761,9.420334],[-7.8832241,9.420319],[-7.8828111,9.4208],[-7.8824301,9.421395],[-7.8813931,9.420863],[-7.8809921,9.421338],[-7.8799771,9.421177],[-7.8789071,9.42147],[-7.8775931,9.42122],[-7.8772501,9.421804],[-7.8762731,9.421559],[-7.8740271,9.421821],[-7.8730031,9.421638],[-7.8722701,9.421823],[-7.8718021,9.422105],[-7.8710681,9.422309],[-7.8704171,9.42227],[-7.8701501,9.422516],[-7.8693741,9.42191],[-7.8690251,9.421885],[-7.8677491,9.422252],[-7.8675161,9.422051],[-7.8675001,9.421903],[-7.8676171,9.42173],[-7.8675891,9.421477],[-7.8673401,9.421155],[-7.8659841,9.421642],[-7.8647141,9.421012],[-7.8647951,9.420742],[-7.8647901,9.420336],[-7.8642431,9.420308],[-7.8625601,9.421013],[-7.8615021,9.421177],[-7.8607841,9.421458],[-7.8596051,9.422019],[-7.8586261,9.421692],[-7.8584891,9.421365],[-7.8566901,9.421282],[-7.8557951,9.421517],[-7.8555561,9.421735],[-7.8555351,9.421893],[-7.8556621,9.422313],[-7.8554911,9.422826],[-7.8548401,9.422899],[-7.8542041,9.422806],[-7.8532731,9.422984],[-7.8530941,9.422913],[-7.8530409,9.4227934],[-7.8533871,9.4220743],[-7.853343,9.4214271],[-7.8532085,9.4211804],[-7.852874,9.4210089],[-7.8526357,9.4213407],[-7.8523439,9.4214655],[-7.8519767,9.421444],[-7.8509159,9.4218791],[-7.8506181,9.422035],[-7.850429,9.4216976],[-7.8501675,9.4214528],[-7.8498084,9.421426],[-7.8496409,9.4215109],[-7.8495252,9.4217065],[-7.8491248,9.4215296],[-7.8489582,9.4212893],[-7.8489365,9.4210854],[-7.8493245,9.4207942],[-7.8497746,9.4206155],[-7.8499945,9.4203755],[-7.8502543,9.4197744],[-7.8501242,9.4194959],[-7.8498444,9.4192333],[-7.8498323,9.4189303],[-7.8500849,9.418475],[-7.8503516,9.4178448],[-7.8514675,9.4177085],[-7.8521053,9.4174287],[-7.8531744,9.4165504],[-7.8542821,9.4158273],[-7.8547532,9.4156359],[-7.8549698,9.4152441],[-7.8548503,9.415024],[-7.8535495,9.4148302],[-7.8530218,9.4148532],[-7.852683,9.4147085],[-7.8518533,9.4136735],[-7.8514086,9.4125554],[-7.8511963,9.4122573],[-7.8511487,9.4119104],[-7.8523511,9.411622],[-7.8524361,9.411225],[-7.8526981,9.411034],[-7.8536371,9.411097],[-7.8541631,9.411044],[-7.8543011,9.410765],[-7.8551641,9.409784],[-7.8556041,9.408316],[-7.8556511,9.40752],[-7.8554471,9.407518],[-7.8551231,9.407633],[-7.8549971,9.407634],[-7.8548901,9.407546],[-7.8551341,9.406902],[-7.8550051,9.406762],[-7.8541766,9.4063076],[-7.8538721,9.406061],[-7.8535991,9.405268],[-7.8536211,9.404633],[-7.8537191,9.403886],[-7.8538461,9.403326],[-7.8541801,9.402806],[-7.8548881,9.401932],[-7.8549571,9.401519],[-7.8541181,9.400443],[-7.8536631,9.399593],[-7.8538641,9.398982],[-7.8542841,9.398731],[-7.8548131,9.39883],[-7.8551601,9.399515],[-7.8554151,9.399508],[-7.8559021,9.398508],[-7.8560861,9.397876],[-7.8559501,9.396924],[-7.8561331,9.396549],[-7.8570771,9.395933],[-7.8578541,9.395058],[-7.8579861,9.394853],[-7.8578041,9.394623],[-7.8566271,9.394304],[-7.8560181,9.393469],[-7.8556931,9.39231],[-7.8560021,9.391784],[-7.8560398,9.3917691],[-7.8566821,9.391515],[-7.8565951,9.390682],[-7.8573141,9.389459],[-7.8574341,9.388913],[-7.8567311,9.38855],[-7.8567081,9.388141],[-7.8571361,9.387937],[-7.8581501,9.387794],[-7.8585391,9.38746],[-7.8588211,9.386848],[-7.8585741,9.386737],[-7.8584291,9.386836],[-7.8583141,9.386849],[-7.8582461,9.386778],[-7.8581961,9.386529],[-7.8583741,9.386148],[-7.8588611,9.386218],[-7.8594111,9.386193],[-7.8596121,9.386085],[-7.8605231,9.385073],[-7.8603121,9.384986],[-7.8599211,9.38503],[-7.8597361,9.384845],[-7.8597511,9.384288],[-7.8607361,9.382002],[-7.8609201,9.381868],[-7.8611121,9.381838],[-7.8622991,9.382138],[-7.8644621,9.38183],[-7.8647071,9.381446],[-7.8641781,9.380741],[-7.8640451,9.379839],[-7.8641999,9.3792555],[-7.8640647,9.3789466],[-7.8638408,9.3787471],[-7.8634488,9.3786538],[-7.8632653,9.3784673],[-7.863133,9.3779455],[-7.8628345,9.3778521],[-7.8622235,9.3782535],[-7.8618142,9.3780054],[-7.861133,9.3769245],[-7.8608953,9.3761141],[-7.8607283,9.3760299],[-7.8602571,9.375952],[-7.860044,9.3756822],[-7.8600421,9.37534],[-7.8599961,9.375067],[-7.8600801,9.374833],[-7.8603031,9.374557],[-7.8611081,9.374644],[-7.8609501,9.373996],[-7.8614681,9.373677],[-7.8622011,9.373592],[-7.8628011,9.374366],[-7.8631761,9.374319],[-7.8633911,9.373853],[-7.8631211,9.373133],[-7.8631331,9.372797],[-7.863712,9.3715686],[-7.8643687,9.370888],[-7.8650131,9.371214],[-7.8658841,9.371127],[-7.8660871,9.371029],[-7.8664551,9.370494],[-7.8671911,9.370026],[-7.8670411,9.369664],[-7.8672771,9.369529],[-7.8676091,9.369528],[-7.8678441,9.36933],[-7.8678671,9.368901],[-7.8680561,9.368557],[-7.8687331,9.368609],[-7.8691041,9.368581],[-7.8695621,9.368419],[-7.8694931,9.368173],[-7.8701911,9.367355],[-7.8706431,9.367418],[-7.8714181,9.367406],[-7.8719761,9.367669],[-7.8723901,9.367501],[-7.8728501,9.36716],[-7.8726021,9.366774],[-7.8729991,9.366558],[-7.8729591,9.366417],[-7.8723911,9.366126],[-7.8722041,9.365934],[-7.8723485,9.3656475],[-7.8726537,9.3653142],[-7.8726761,9.365111],[-7.8724781,9.364871],[-7.8723601,9.364836],[-7.871862,9.3652698],[-7.8701971,9.365572],[-7.8700001,9.365463],[-7.8698321,9.365253],[-7.8695631,9.363112],[-7.8692271,9.362741],[-7.8690461,9.362699],[-7.8687341,9.362761],[-7.8685011,9.362337],[-7.8686761,9.362057],[-7.8690991,9.361868],[-7.8691901,9.361726],[-7.8692023,9.3610908],[-7.86938,9.3607224],[-7.8698006,9.360416],[-7.8701838,9.3604589],[-7.8703763,9.360672],[-7.8704749,9.3612903],[-7.8717587,9.3622704],[-7.8723479,9.3622477],[-7.8732273,9.3618062],[-7.8738908,9.3611254],[-7.874643,9.3602992],[-7.8744601,9.359635],[-7.8736341,9.359238],[-7.8735871,9.35888],[-7.8737031,9.358455],[-7.8736011,9.358326],[-7.8733711,9.358211],[-7.8729701,9.357242],[-7.8732331,9.35691],[-7.8734461,9.356807],[-7.8751771,9.356922],[-7.8754791,9.356729],[-7.8760311,9.356499],[-7.8771841,9.355613],[-7.8772111,9.355386],[-7.8774381,9.354856],[-7.8775441,9.354475],[-7.8774881,9.354314],[-7.8772741,9.354086],[-7.8768191,9.354223],[-7.8764981,9.354165],[-7.8763051,9.353994],[-7.8757641,9.354042],[-7.8755671,9.353982],[-7.8755271,9.353656],[-7.8756871,9.353465],[-7.8766151,9.352861],[-7.8758371,9.352265],[-7.8758851,9.351896],[-7.8763711,9.351669],[-7.8764391,9.351103],[-7.8768691,9.350737],[-7.8771011,9.350341],[-7.8760811,9.348513],[-7.8759501,9.347908],[-7.8760201,9.347539],[-7.8765901,9.347323],[-7.8769041,9.347152],[-7.8770611,9.346825],[-7.8773111,9.346676],[-7.8780811,9.347037],[-7.8787211,9.346788],[-7.8790491,9.345461],[-7.8785971,9.34509],[-7.8781231,9.344825],[-7.8779781,9.344847],[-7.8778901,9.344724],[-7.8780091,9.344515],[-7.8786151,9.344302],[-7.8792591,9.344393],[-7.8800351,9.343401],[-7.8802701,9.342835],[-7.8803391,9.342254],[-7.8797801,9.342038],[-7.8794971,9.341818],[-7.8791121,9.341315],[-7.8785061,9.340725],[-7.8787971,9.340481],[-7.8794341,9.340255],[-7.8811481,9.340072],[-7.8817811,9.339915],[-7.8819891,9.339614],[-7.8806041,9.338445],[-7.8795961,9.337986],[-7.8793631,9.337719],[-7.8795551,9.336776],[-7.8797241,9.336288],[-7.8801301,9.336198],[-7.8809761,9.336412],[-7.8820601,9.335956],[-7.8820541,9.334891],[-7.8818371,9.334051],[-7.8818031,9.333759],[-7.8823101,9.332549],[-7.8824051,9.332209],[-7.8824261,9.331284],[-7.8818521,9.33068],[-7.8817001,9.330258],[-7.8816691,9.32931],[-7.8811611,9.328539],[-7.8802711,9.326532],[-7.8801531,9.32634],[-7.8801031,9.326069],[-7.8805761,9.325885],[-7.8810861,9.32556],[-7.8810011,9.325327],[-7.8806561,9.324851],[-7.8800161,9.324295],[-7.8799281,9.324151],[-7.8799101,9.322593],[-7.8795591,9.321619],[-7.8791161,9.321419],[-7.8789021,9.321053],[-7.8786941,9.32091],[-7.8784651,9.320865],[-7.8777031,9.321142],[-7.8775241,9.32114],[-7.8774601,9.321039],[-7.8775011,9.320862],[-7.8777591,9.320597],[-7.8778081,9.320496],[-7.8777721,9.32036],[-7.8775511,9.320226],[-7.8772501,9.319843],[-7.8770751,9.319312],[-7.8766891,9.318644],[-7.8768451,9.318342],[-7.8777731,9.317501],[-7.8781051,9.316071],[-7.8775501,9.31595],[-7.8774761,9.31561],[-7.8777411,9.314736],[-7.8779351,9.31375],[-7.8783131,9.31356],[-7.8785331,9.313118],[-7.8796131,9.312608],[-7.8805861,9.311909],[-7.8800151,9.311628],[-7.8797411,9.311398],[-7.8798591,9.310977],[-7.8798811,9.310627],[-7.8797401,9.310454],[-7.8794701,9.310317],[-7.8791421,9.310334],[-7.8788691,9.310509],[-7.8787021,9.310484],[-7.8786591,9.309933],[-7.8787141,9.309244],[-7.8777121,9.307831],[-7.8776031,9.307431],[-7.8779961,9.305712],[-7.8782241,9.305009],[-7.8783271,9.304498],[-7.8781501,9.304221],[-7.8773651,9.303765],[-7.8769571,9.303445],[-7.8772361,9.301104],[-7.8770131,9.300534],[-7.8761071,9.300407],[-7.8748551,9.300802],[-7.8744321,9.300514],[-7.8739341,9.298997],[-7.8744291,9.298283],[-7.8751271,9.297991],[-7.8759741,9.297983],[-7.8771851,9.29815],[-7.8774761,9.297914],[-7.8775871,9.297145],[-7.8774741,9.295998],[-7.8765661,9.294807],[-7.8763601,9.294167],[-7.8764191,9.293348],[-7.8766961,9.292913],[-7.8771121,9.292541],[-7.8780581,9.292668],[-7.8779181,9.293288],[-7.8787161,9.293592],[-7.8792251,9.293572],[-7.8797521,9.293199],[-7.8803751,9.292089],[-7.8808921,9.291849],[-7.8813131,9.292217],[-7.8809781,9.292758],[-7.8812631,9.292948],[-7.8827401,9.291664],[-7.8826011,9.29124],[-7.8826251,9.291042],[-7.8829301,9.290647],[-7.8832481,9.290688],[-7.8836491,9.29045],[-7.8837781,9.29018],[-7.8836961,9.289947],[-7.8836391,9.289552],[-7.8839501,9.288312],[-7.8846141,9.287593],[-7.8851611,9.287204],[-7.8868541,9.286547],[-7.8880711,9.285952],[-7.8886831,9.2851],[-7.8889351,9.284524],[-7.8876451,9.28436],[-7.8872461,9.28394],[-7.8863091,9.283505],[-7.8856381,9.283816],[-7.8846431,9.283628],[-7.8834351,9.283027],[-7.8837431,9.282026],[-7.8841391,9.281417],[-7.8848241,9.281257],[-7.8888001,9.281895],[-7.8890541,9.281564],[-7.8888091,9.28103],[-7.8890051,9.280266],[-7.8897251,9.280201],[-7.8899791,9.279808],[-7.8902781,9.27838],[-7.8913041,9.277672],[-7.8914401,9.276456],[-7.8918081,9.275601],[-7.8918141,9.275216],[-7.8912151,9.274375],[-7.8912251,9.274021],[-7.8911371,9.273484],[-7.8907371,9.273147],[-7.8905931,9.272765],[-7.8907961,9.272272],[-7.8911811,9.272046],[-7.8913831,9.272087],[-7.8917421,9.272365],[-7.8936771,9.272151],[-7.8938671,9.271916],[-7.8946881,9.271748],[-7.8949171,9.271393],[-7.8952061,9.270657],[-7.8945411,9.270058],[-7.8946971,9.269258],[-7.8953231,9.267967],[-7.8954121,9.267488],[-7.8956461,9.266968],[-7.8961491,9.266579],[-7.8963941,9.266192],[-7.8964071,9.265853],[-7.8965611,9.265555],[-7.8967091,9.265024],[-7.8967221,9.264373],[-7.8970231,9.263747],[-7.8973781,9.263149],[-7.8976301,9.262595],[-7.8979941,9.262078],[-7.8990331,9.262292],[-7.8990971,9.262017],[-7.8987601,9.261825],[-7.8985671,9.261475],[-7.8985351,9.261007],[-7.8987181,9.260798],[-7.8992061,9.26069],[-7.8995841,9.261017],[-7.8999751,9.260792],[-7.9000621,9.260558],[-7.9000011,9.26017],[-7.8997471,9.259917],[-7.8994371,9.259681],[-7.8985591,9.25945],[-7.8984971,9.259213],[-7.8986491,9.258984],[-7.8990631,9.258594],[-7.8991101,9.258394],[-7.8986261,9.258389],[-7.8981171,9.258476],[-7.8978921,9.258272],[-7.8978851,9.25792],[-7.8980751,9.257477],[-7.8985721,9.256952],[-7.8997901,9.256866],[-7.9001441,9.256593],[-7.9004201,9.256166],[-7.9004661,9.255828],[-7.9004161,9.255494],[-7.8995481,9.25533],[-7.8996141,9.255063],[-7.8998071,9.254839],[-7.8999401,9.254498],[-7.8998341,9.253841],[-7.9000511,9.253246],[-7.9000141,9.253014],[-7.9002051,9.252817],[-7.9009411,9.252252],[-7.9007891,9.251651],[-7.9009511,9.251155],[-7.9012611,9.250905],[-7.9015121,9.250508],[-7.9020881,9.250206],[-7.9026081,9.250143],[-7.902936,9.2499788],[-7.9031281,9.249747],[-7.9036992,9.2490585],[-7.9041831,9.2484765],[-7.9041321,9.248033],[-7.9038281,9.248036],[-7.9037891,9.247887],[-7.9038091,9.247423],[-7.9045831,9.246165],[-7.9047341,9.245684],[-7.9044271,9.24524],[-7.9043152,9.2446775],[-7.9047407,9.2442896],[-7.9047372,9.2436052],[-7.9053091,9.243182],[-7.9060221,9.242957],[-7.9062061,9.242479],[-7.9060201,9.242029],[-7.9057358,9.241502],[-7.9059022,9.2408479],[-7.9055162,9.2396668],[-7.9058533,9.2393009],[-7.9068191,9.239124],[-7.9084001,9.239293],[-7.9097551,9.238692],[-7.9098581,9.238366],[-7.9097761,9.238218],[-7.9095051,9.238281],[-7.9092861,9.238159],[-7.9088281,9.237094],[-7.9092881,9.237006],[-7.9098062,9.2365685],[-7.9110902,9.2361797],[-7.9113671,9.23566],[-7.9117019,9.2341747],[-7.9110725,9.2332397],[-7.9108821,9.232522],[-7.9110876,9.2323346],[-7.911535,9.2325941],[-7.9117617,9.2324191],[-7.9118647,9.2320959],[-7.9116732,9.2319422],[-7.910947,9.2316839],[-7.9110321,9.230182],[-7.9112481,9.229825],[-7.9137715,9.229052],[-7.9146217,9.2276245],[-7.9145198,9.2273051],[-7.9141826,9.2272338],[-7.9140357,9.226757],[-7.9142281,9.225927],[-7.9145641,9.225307],[-7.9147921,9.224986],[-7.9159324,9.223963],[-7.9160743,9.2233675],[-7.9164011,9.223266],[-7.9167471,9.223002],[-7.9176041,9.222544],[-7.9180447,9.2225338],[-7.918065,9.2228779],[-7.918252,9.2230368],[-7.918576,9.2228556],[-7.9188961,9.222336],[-7.9189784,9.2217763],[-7.919337,9.2212496],[-7.9192638,9.2209549],[-7.9186861,9.220884],[-7.9188185,9.2201432],[-7.9187194,9.2196681],[-7.9193613,9.2193078],[-7.9194061,9.218746],[-7.91908,9.2179689],[-7.9188114,9.2175122],[-7.9188062,9.2170607],[-7.918492,9.2164174],[-7.9187225,9.2155244],[-7.9203174,9.2146427],[-7.9208354,9.2149707],[-7.921439,9.2151347],[-7.9217245,9.2149411],[-7.9217887,9.2139572],[-7.92253,9.2140939],[-7.9229003,9.2137684],[-7.9230578,9.2132044],[-7.9224979,9.2129836],[-7.9213605,9.2128561],[-7.9209323,9.2122869],[-7.9205267,9.2125529],[-7.9200956,9.212361],[-7.9201381,9.210776],[-7.9200401,9.209789],[-7.9197611,9.208766],[-7.9195351,9.208625],[-7.9189841,9.209095],[-7.9182781,9.209122],[-7.9178821,9.208671],[-7.9174211,9.206962],[-7.9171531,9.206683],[-7.9167121,9.206342],[-7.9165161,9.205812],[-7.9165721,9.205368],[-7.9165721,9.204458],[-7.9169271,9.204261],[-7.9165281,9.202449],[-7.9166871,9.2019993],[-7.9168321,9.20159],[-7.9164571,9.201391],[-7.9160579,9.200275],[-7.9161537,9.1994929],[-7.9161162,9.1990851],[-7.9157855,9.1988031],[-7.9158587,9.1984391],[-7.9158314,9.1981128],[-7.9160089,9.1977189],[-7.9159974,9.1972895],[-7.9159016,9.1969246],[-7.9161721,9.1963317],[-7.916128,9.1959753],[-7.915966,9.1957543],[-7.9161216,9.1954472],[-7.9161645,9.1952301],[-7.915966,9.1951347],[-7.9156763,9.1952936],[-7.9154456,9.1952565],[-7.9152091,9.195056],[-7.9152948,9.194516],[-7.9144532,9.1942205],[-7.9146455,9.193153],[-7.9138449,9.1925304],[-7.9140613,9.1922353],[-7.9139331,9.1918705],[-7.9143837,9.1913268],[-7.9143484,9.1908442],[-7.9141451,9.190414],[-7.9144781,9.189934],[-7.9144151,9.189365],[-7.9139171,9.188852],[-7.9130855,9.188741],[-7.9123071,9.188377],[-7.9119461,9.187071],[-7.9112854,9.1867539],[-7.9111992,9.1862885],[-7.9108331,9.1860222],[-7.9100802,9.186299],[-7.9096455,9.1858213],[-7.9085441,9.185455],[-7.9085021,9.185126],[-7.9084151,9.184917],[-7.9081741,9.18473],[-7.908091,9.18439],[-7.9086619,9.1843554],[-7.9087611,9.1840854],[-7.9084646,9.183877],[-7.9083661,9.183138],[-7.9078801,9.182479],[-7.9076691,9.181633],[-7.9069781,9.180916],[-7.9060311,9.180782],[-7.9056381,9.180597],[-7.9054871,9.179505],[-7.9053081,9.17877],[-7.9039231,9.178325],[-7.9036291,9.177639],[-7.9026291,9.177305],[-7.9014071,9.177716],[-7.9006481,9.177894],[-7.9004531,9.177812],[-7.9003181,9.177544],[-7.9003891,9.177081],[-7.9002271,9.176069],[-7.8996751,9.175841],[-7.8992741,9.175436],[-7.8991561,9.174903],[-7.8983631,9.174575],[-7.8980731,9.174096],[-7.8981221,9.173677],[-7.8980281,9.173506],[-7.8979131,9.173454],[-7.8973751,9.173777],[-7.8969021,9.173718],[-7.8961181,9.172742],[-7.8959381,9.172686],[-7.8955971,9.172735],[-7.8952751,9.172646],[-7.8950631,9.172264],[-7.8949051,9.171819],[-7.8947041,9.171502],[-7.8944961,9.170865],[-7.8945781,9.170708],[-7.8945281,9.170537],[-7.8942961,9.170449],[-7.8939141,9.170549],[-7.8937761,9.170502],[-7.8936631,9.17],[-7.8920701,9.1692],[-7.8912041,9.168685],[-7.8910591,9.168523],[-7.8909721,9.167978],[-7.8906571,9.16733],[-7.8901661,9.167115],[-7.8899191,9.167201],[-7.8894961,9.166938],[-7.8891541,9.166523],[-7.8889501,9.166426],[-7.8882941,9.166818],[-7.8878031,9.166565],[-7.8870681,9.165266],[-7.8863851,9.164953],[-7.8844691,9.164441],[-7.8840731,9.163922],[-7.8835351,9.1631783],[-7.8833241,9.1626876],[-7.8826849,9.1626483],[-7.8829014,9.1621636],[-7.8826401,9.161609],[-7.8814781,9.161385],[-7.8810261,9.161417],[-7.8790193,9.1612105],[-7.8782761,9.1607191],[-7.8772547,9.1604982],[-7.8769527,9.160763],[-7.8755661,9.160091],[-7.8746041,9.160735],[-7.8730251,9.160363],[-7.8721201,9.1599],[-7.8707741,9.15936],[-7.8701761,9.159018],[-7.8696171,9.159224],[-7.8694191,9.159384],[-7.8685091,9.160376],[-7.8677371,9.161349],[-7.8673211,9.161633],[-7.8667751,9.162279],[-7.8663911,9.162637],[-7.8660471,9.162785],[-7.8653841,9.163202],[-7.8642681,9.163062],[-7.8634821,9.164173],[-7.8626641,9.16371],[-7.8621021,9.163921],[-7.8619861,9.164165],[-7.8619661,9.164493],[-7.8621541,9.164974],[-7.8621154,9.1652887],[-7.8611553,9.1651139],[-7.8601832,9.1651365],[-7.8598571,9.1656277],[-7.8599559,9.1667061],[-7.8592771,9.167245],[-7.8582504,9.1674647],[-7.8567711,9.167484],[-7.8559581,9.168179],[-7.8550711,9.168669],[-7.8550421,9.16949],[-7.8547801,9.170346],[-7.8545171,9.171454],[-7.8542631,9.172178],[-7.8535381,9.172377],[-7.8533411,9.173392],[-7.8526021,9.174319],[-7.8524321,9.175485],[-7.8521461,9.176601],[-7.8501841,9.179103],[-7.8487951,9.179695],[-7.8480711,9.179028],[-7.8473741,9.178573],[-7.8468591,9.178467],[-7.8460711,9.178531],[-7.8444851,9.178449],[-7.8438631,9.178835],[-7.8402561,9.178135],[-7.8398161,9.178156],[-7.8384131,9.178344],[-7.8354811,9.178972],[-7.8338691,9.178093],[-7.8329171,9.178097],[-7.8310191,9.177826],[-7.8300811,9.177776],[-7.8288431,9.177423],[-7.8280111,9.177408],[-7.8271471,9.177067],[-7.8240281,9.176465],[-7.8233571,9.17602],[-7.8224891,9.175299],[-7.8217441,9.174847],[-7.8203621,9.173235],[-7.8212421,9.171475],[-7.8225191,9.169926],[-7.8234401,9.168895],[-7.8235621,9.166656],[-7.8232311,9.16423],[-7.8238401,9.162989],[-7.8239801,9.161325],[-7.8237981,9.159346],[-7.8237691,9.15855],[-7.8235931,9.157919],[-7.8231111,9.156685],[-7.8227401,9.15637],[-7.8226591,9.156239],[-7.8224591,9.155826],[-7.8223861,9.155508],[-7.8221291,9.155038],[-7.8213601,9.153919],[-7.8212201,9.153533],[-7.8209791,9.153213],[-7.8208161,9.1526],[-7.8208161,9.152082],[-7.8203251,9.151362],[-7.8198151,9.150912],[-7.8182941,9.149982],[-7.8172231,9.149252],[-7.8139741,9.147376],[-7.8131521,9.146484],[-7.8125541,9.146082],[-7.8119781,9.145845],[-7.8111371,9.145575],[-7.8102661,9.145103],[-7.8088931,9.144018],[-7.8084021,9.143875],[-7.8078181,9.143476],[-7.8074861,9.143323],[-7.8076151,9.142636],[-7.8076151,9.141994],[-7.8072441,9.141354],[-7.8066331,9.14115],[-7.8064781,9.140754],[-7.8065621,9.140122],[-7.8066871,9.139686],[-7.8069061,9.139317],[-7.8065811,9.138971],[-7.8068541,9.138686],[-7.8070921,9.138115],[-7.8073961,9.137546],[-7.8071941,9.136688],[-7.8072341,9.136287],[-7.8071771,9.135748],[-7.8069251,9.135308],[-7.8066401,9.134308],[-7.8067351,9.132952],[-7.8065921,9.132381],[-7.8056491,9.132563],[-7.8055331,9.131102],[-7.8052271,9.130883],[-7.8044981,9.130834],[-7.8039771,9.130716],[-7.8035961,9.130181],[-7.8031851,9.130194],[-7.8024371,9.130016],[-7.8019161,9.129568],[-7.8012391,9.129708],[-7.8007381,9.128669],[-7.7995541,9.128157],[-7.7983521,9.126685],[-7.7976781,9.126348],[-7.7972851,9.125867],[-7.7972271,9.124887],[-7.7967221,9.124224],[-7.7965301,9.123788],[-7.7957701,9.123667],[-7.7952911,9.123263],[-7.7946251,9.122412],[-7.7937061,9.121715],[-7.7929691,9.121534],[-7.7927911,9.120936],[-7.7928621,9.120388],[-7.7921721,9.120141],[-7.7918191,9.119752],[-7.7918391,9.119413],[-7.7916661,9.119069],[-7.7912881,9.118728],[-7.7908971,9.118505],[-7.7905401,9.118367],[-7.7901241,9.117999],[-7.7896161,9.117296],[-7.7891481,9.116411],[-7.7889841,9.115487],[-7.7883751,9.115148],[-7.7878951,9.114769],[-7.7874701,9.114651],[-7.7871711,9.11438],[-7.7868401,9.114342],[-7.7865631,9.114052],[-7.7861891,9.113173],[-7.7859811,9.112496],[-7.7855251,9.112053],[-7.7850671,9.111871],[-7.7852011,9.111346],[-7.7849941,9.110874],[-7.7847431,9.110579],[-7.7838381,9.110041],[-7.7839161,9.109538],[-7.7839161,9.109038],[-7.7833731,9.108837],[-7.7825441,9.108137],[-7.7826551,9.107587],[-7.7828011,9.107286],[-7.7823871,9.107203],[-7.7820861,9.106935],[-7.7822971,9.106207],[-7.7815661,9.106166],[-7.7807021,9.105787],[-7.7802871,9.104996],[-7.7790671,9.104705],[-7.7784191,9.104636],[-7.7779201,9.105255],[-7.7770991,9.105499],[-7.7764331,9.10529],[-7.7757521,9.105242],[-7.7750441,9.104774],[-7.7752541,9.103899],[-7.7750651,9.103217],[-7.7749891,9.102671],[-7.7747401,9.102396],[-7.7743171,9.102407],[-7.7739891,9.102019],[-7.7738381,9.101521],[-7.7739261,9.101343],[-7.7736071,9.101057],[-7.7735411,9.100924],[-7.7734941,9.100615],[-7.7732021,9.100649],[-7.7726151,9.100891],[-7.7722661,9.100718],[-7.7720531,9.100491],[-7.7715611,9.100561],[-7.7709291,9.100484],[-7.7706531,9.100282],[-7.7704811,9.100095],[-7.7704911,9.099976],[-7.7706141,9.099758],[-7.7706141,9.099568],[-7.7708291,9.099378],[-7.7707881,9.099209],[-7.7706101,9.099066],[-7.7704011,9.099107],[-7.7703761,9.099354],[-7.7701211,9.099703],[-7.7699671,9.099394],[-7.7697281,9.0992],[-7.7695611,9.099169],[-7.7694481,9.099211],[-7.7692131,9.09962],[-7.7687051,9.099385],[-7.7683151,9.099324],[-7.7681081,9.099395],[-7.7679041,9.099742],[-7.7675161,9.099848],[-7.7673411,9.099446],[-7.7669161,9.09923],[-7.7666621,9.098314],[-7.7668061,9.097548],[-7.7671641,9.096974],[-7.7669771,9.096794],[-7.7651111,9.095903],[-7.7643471,9.095418],[-7.7637141,9.095],[-7.7635771,9.094709],[-7.7633951,9.094544],[-7.7629651,9.094399],[-7.7622601,9.094473],[-7.7615541,9.094425],[-7.7612201,9.094532],[-7.7606701,9.094289],[-7.7604901,9.094292],[-7.7602461,9.094688],[-7.7599021,9.094592],[-7.7596481,9.094435],[-7.7589671,9.094408],[-7.7585591,9.09416],[-7.7580921,9.093975],[-7.7578371,9.094],[-7.7577891,9.094214],[-7.7575981,9.094558],[-7.7574341,9.094536],[-7.7571871,9.094252],[-7.7566881,9.094762],[-7.7546531,9.095083],[-7.7541701,9.095055],[-7.7544171,9.093922],[-7.7536431,9.09299],[-7.7533981,9.092873],[-7.7531011,9.092906],[-7.7527771,9.093034],[-7.7521741,9.092787],[-7.7519601,9.092549],[-7.7516261,9.092382],[-7.7509391,9.092542],[-7.7505241,9.092445],[-7.7503411,9.091692],[-7.7500061,9.091921],[-7.7494461,9.092001],[-7.7489231,9.091994],[-7.7484221,9.09093],[-7.7476241,9.090568],[-7.7467381,9.089683],[-7.7462731,9.088979],[-7.7452611,9.088453],[-7.7449371,9.088227],[-7.7448051,9.087982],[-7.7440771,9.087447],[-7.7441151,9.087095],[-7.7433491,9.086761],[-7.7425491,9.086286],[-7.7425281,9.0858],[-7.7421051,9.085925],[-7.7418611,9.085695],[-7.7411741,9.085631],[-7.7409671,9.085328],[-7.7405791,9.085204],[-7.7403691,9.085058],[-7.7402081,9.084812],[-7.7397211,9.084704],[-7.7395641,9.084329],[-7.7392791,9.084111],[-7.7387051,9.084501],[-7.7385021,9.084745],[-7.7379061,9.084413],[-7.7375121,9.084379],[-7.7373141,9.084099],[-7.7368881,9.083697],[-7.7364351,9.083421],[-7.7362171,9.082685],[-7.7358611,9.082441],[-7.7354631,9.082319],[-7.7351401,9.082302],[-7.7347821,9.082617],[-7.7343871,9.082881],[-7.7327421,9.081741],[-7.7323751,9.081795],[-7.7320001,9.082126],[-7.7311521,9.082017],[-7.7309371,9.081744],[-7.7305341,9.08177],[-7.7304411,9.081473],[-7.7301271,9.081269],[-7.7301991,9.08117],[-7.7305681,9.081084],[-7.7307241,9.080814],[-7.7306291,9.080618],[-7.7306031,9.080365],[-7.7305331,9.080214],[-7.7303411,9.080297],[-7.7301481,9.080465],[-7.7298981,9.080338],[-7.7297461,9.079834],[-7.7299611,9.079402],[-7.7298121,9.079139],[-7.7291361,9.078842],[-7.7289571,9.078584],[-7.7291291,9.078284],[-7.7294381,9.077959],[-7.7290791,9.077678],[-7.7289021,9.077434],[-7.7290691,9.076975],[-7.7287041,9.076727],[-7.7287551,9.07648],[-7.7285661,9.076038],[-7.7282071,9.075625],[-7.7274681,9.074628],[-7.7267671,9.073397],[-7.7265641,9.072818],[-7.7265664,9.072677],[-7.7272441,9.072249],[-7.7278201,9.071648],[-7.7281341,9.071202],[-7.7282391,9.070861],[-7.7286811,9.070516],[-7.7289881,9.070151],[-7.7295591,9.068956],[-7.7304161,9.067884],[-7.7303351,9.067646],[-7.7310561,9.066839],[-7.7317211,9.066374],[-7.7335201,9.065649],[-7.7335781,9.064959],[-7.7340301,9.064721],[-7.7347921,9.06453],[-7.7373341,9.064234],[-7.7379121,9.064508],[-7.7390061,9.064761],[-7.7407401,9.06434],[-7.7415731,9.064649],[-7.7423261,9.065147],[-7.7439291,9.06572],[-7.7453091,9.065839],[-7.7477401,9.065692],[-7.7488351,9.065817],[-7.7494981,9.065326],[-7.7500501,9.065239],[-7.7506521,9.065224],[-7.7508531,9.065276],[-7.7511021,9.065665],[-7.7512031,9.066023],[-7.7519481,9.066143],[-7.7530261,9.066664],[-7.7540341,9.067255],[-7.7545771,9.066638],[-7.7551791,9.066789],[-7.7568001,9.067406],[-7.7572581,9.06782],[-7.7579621,9.068075],[-7.7580661,9.068475],[-7.7578731,9.069011],[-7.7581051,9.069288],[-7.7594221,9.069498],[-7.7603971,9.069879],[-7.7613631,9.070024],[-7.7620111,9.070255],[-7.7624321,9.070765],[-7.7635381,9.070997],[-7.7644431,9.071307],[-7.7654261,9.072163],[-7.7661211,9.072406],[-7.7664961,9.072848],[-7.7679041,9.072976],[-7.7689511,9.07264],[-7.7704431,9.072934],[-7.7735991,9.073293],[-7.7741571,9.07366],[-7.7746471,9.073367],[-7.7755991,9.073778],[-7.7762481,9.073792],[-7.7773301,9.074448],[-7.7787731,9.074169],[-7.7799321,9.074435],[-7.7807091,9.074146],[-7.7816761,9.073687],[-7.7834071,9.073639],[-7.7854771,9.073305],[-7.7868811,9.073329],[-7.7878801,9.072901],[-7.7887151,9.073097],[-7.7902481,9.073705],[-7.7913131,9.074366],[-7.7925641,9.074688],[-7.7948761,9.074233],[-7.7957091,9.074519],[-7.7964221,9.074638],[-7.7968501,9.074329],[-7.7970171,9.073853],[-7.7972311,9.073615],[-7.7979211,9.07352],[-7.7984451,9.073353],[-7.7985451,9.072975],[-7.7988341,9.072689],[-7.7991501,9.072654],[-7.7995111,9.072531],[-7.8000691,9.072511],[-7.8010801,9.072729],[-7.8023511,9.073346],[-7.8031711,9.07348],[-7.8039941,9.07338],[-7.8044191,9.073528],[-7.8050981,9.073852],[-7.8058041,9.073929],[-7.8066271,9.073449],[-7.8072491,9.072592],[-7.8074681,9.072207],[-7.8080381,9.071645],[-7.8089381,9.070865],[-7.8090251,9.070331],[-7.8096191,9.070501],[-7.8098571,9.070298],[-7.8113421,9.070165],[-7.8121271,9.069641],[-7.8133401,9.069593],[-7.8150611,9.068732],[-7.8158141,9.068573],[-7.8162021,9.067957],[-7.8164531,9.067683],[-7.8165431,9.067148],[-7.8190041,9.065823],[-7.8208501,9.064402],[-7.8209861,9.064094],[-7.8212261,9.063798],[-7.8221471,9.063604],[-7.8240611,9.064467],[-7.8252071,9.064644],[-7.8259101,9.064867],[-7.8267641,9.064994],[-7.8278551,9.065409],[-7.8291241,9.065365],[-7.8309041,9.065914],[-7.8328631,9.067073],[-7.8367101,9.066416],[-7.8402621,9.066225],[-7.8414261,9.065429],[-7.8425231,9.063148],[-7.8429041,9.062218],[-7.8433191,9.061441],[-7.8446771,9.060933],[-7.8456821,9.060447],[-7.8475111,9.059247],[-7.8478861,9.058644],[-7.8486861,9.058022],[-7.8491441,9.056996],[-7.8492541,9.056278],[-7.8491851,9.055711],[-7.8488161,9.0549],[-7.8480601,9.054322],[-7.8479431,9.053854],[-7.8480861,9.052612],[-7.8485901,9.05079],[-7.8487651,9.050452],[-7.8489431,9.049949],[-7.8490551,9.04938],[-7.8494301,9.048937],[-7.8497301,9.048481],[-7.8499581,9.047922],[-7.8502131,9.047107],[-7.8501971,9.046949],[-7.8503531,9.046572],[-7.8501641,9.046275],[-7.8501341,9.045911],[-7.8495761,9.04502],[-7.8484021,9.044115],[-7.8485111,9.043533],[-7.8488351,9.042975],[-7.8491451,9.042912],[-7.8495281,9.042596],[-7.8496871,9.042316],[-7.8497501,9.042041],[-7.8497151,9.041856],[-7.8498391,9.041788],[-7.8499431,9.041494],[-7.8507721,9.041285],[-7.8511981,9.041106],[-7.8518291,9.040672],[-7.8524921,9.040012],[-7.8531841,9.03909],[-7.8541171,9.038939],[-7.8538811,9.037942],[-7.8540001,9.0373],[-7.8537081,9.036016],[-7.8537241,9.035615],[-7.8544031,9.035855],[-7.8547541,9.035696],[-7.8550631,9.035485],[-7.8553821,9.035496],[-7.8559231,9.034991],[-7.8561521,9.034038],[-7.8561721,9.033422],[-7.8567401,9.032525],[-7.8581281,9.032292],[-7.8617671,9.031501],[-7.8638461,9.030976],[-7.8653711,9.030177],[-7.8661821,9.030286],[-7.8687641,9.029756],[-7.8704341,9.030611],[-7.8732391,9.030102],[-7.8737801,9.0301],[-7.8753871,9.030432],[-7.8759011,9.030145],[-7.8767231,9.029778],[-7.8781831,9.030059],[-7.8797801,9.03118],[-7.8809321,9.031431],[-7.8818281,9.031421],[-7.8819111,9.031351],[-7.8837661,9.030742],[-7.8869751,9.029113],[-7.8885361,9.02824],[-7.8916221,9.028013],[-7.8943321,9.027383],[-7.8969921,9.026426],[-7.8986781,9.025193],[-7.8994031,9.018622],[-7.8987511,9.012029],[-7.9015521,9.01073],[-7.9064391,9.008212],[-7.9078511,9.007202],[-7.9125041,9.002985],[-7.9196271,9.000037],[-7.9271191,8.995655],[-7.9286581,8.993423],[-7.9297781,8.989399],[-7.9310651,8.989409],[-7.9340011,8.987946],[-7.9344491,8.983832],[-7.9344781,8.982553],[-7.9347171,8.981848],[-7.9345161,8.980992],[-7.9337681,8.979736],[-7.9324751,8.977707],[-7.9316611,8.977577],[-7.9301391,8.975305],[-7.9294981,8.973236],[-7.9287071,8.969795],[-7.9281541,8.968265],[-7.9272201,8.967728],[-7.9271061,8.967487],[-7.9270081,8.966435],[-7.9270221,8.965806],[-7.9272091,8.964308],[-7.9281191,8.962194],[-7.9294831,8.960054],[-7.9299651,8.958181],[-7.9299151,8.957371],[-7.9292791,8.956838],[-7.9295631,8.955846],[-7.9294871,8.955277],[-7.9290561,8.953911],[-7.9277541,8.951518],[-7.9270711,8.950574],[-7.9267041,8.949741],[-7.9267081,8.948655],[-7.9262021,8.947119],[-7.9259441,8.945577],[-7.9261081,8.944522],[-7.9250611,8.943499],[-7.9238581,8.943034],[-7.9237191,8.94262],[-7.9235181,8.94224],[-7.9233951,8.941215],[-7.9220991,8.940494],[-7.9221571,8.940038],[-7.9218591,8.939875],[-7.9203001,8.938661],[-7.9186211,8.936601],[-7.9175381,8.936899],[-7.9164431,8.936633],[-7.9166981,8.935632],[-7.9185591,8.93215],[-7.9191391,8.930978],[-7.9200741,8.929861],[-7.9210421,8.928335],[-7.9219271,8.927207],[-7.9238091,8.925904],[-7.9259931,8.924725],[-7.9313821,8.915431],[-7.9324981,8.913572],[-7.9336701,8.912644],[-7.9338701,8.912067],[-7.9344281,8.911237],[-7.9365131,8.907627],[-7.9390131,8.904615],[-7.9397371,8.902507],[-7.9403891,8.901964],[-7.9423661,8.900458],[-7.9425761,8.899587],[-7.9427781,8.898127],[-7.9426241,8.89732],[-7.9426731,8.896213],[-7.9432131,8.894452],[-7.9435051,8.893147],[-7.9430991,8.892343],[-7.9428121,8.891412],[-7.9422081,8.890502],[-7.9411961,8.890153],[-7.9379201,8.889988],[-7.9343841,8.888504],[-7.9284271,8.887452],[-7.9268061,8.886265],[-7.9250871,8.884126],[-7.9253091,8.883793],[-7.9265881,8.882485],[-7.9269561,8.881752],[-7.9287371,8.881338],[-7.9292501,8.879302],[-7.9303461,8.87876],[-7.9321191,8.87731],[-7.9331171,8.876018],[-7.9376391,8.849049],[-7.9378821,8.849035],[-7.9388971,8.849458],[-7.9398321,8.849538],[-7.9407551,8.849335],[-7.9419601,8.849369],[-7.9426221,8.849463],[-7.9448091,8.849092],[-7.9454171,8.84918],[-7.9473501,8.849627],[-7.9482791,8.849711],[-7.9493201,8.849513],[-7.9498751,8.849511],[-7.9516591,8.849106],[-7.9525871,8.848583],[-7.9535081,8.847265],[-7.9539881,8.847086],[-7.9546001,8.846643],[-7.9547591,8.846324],[-7.9552951,8.845816],[-7.9557001,8.845308],[-7.9558471,8.844918],[-7.9556391,8.843927],[-7.9551351,8.842845],[-7.9549791,8.842374],[-7.9550711,8.841976],[-7.9561481,8.841723],[-7.9570621,8.841788],[-7.9599571,8.841475],[-7.9606761,8.841829],[-7.9615821,8.842087],[-7.9621531,8.842063],[-7.9633581,8.842101],[-7.9647801,8.841884],[-7.9659391,8.841563],[-7.9660791,8.841492],[-7.9663411,8.841206],[-7.9671261,8.840968],[-7.9674511,8.840734],[-7.9685191,8.840261],[-7.9689341,8.840034],[-7.9701481,8.838565],[-7.9707901,8.838018],[-7.9715521,8.837137],[-7.9719091,8.836399],[-7.9720751,8.835733],[-7.9723881,8.835031],[-7.9729801,8.83421],[-7.9732411,8.833187],[-7.9735501,8.832545],[-7.9740261,8.83195],[-7.9741451,8.831427],[-7.9745501,8.831022],[-7.9747401,8.830403],[-7.9747081,8.829746],[-7.9743751,8.829389],[-7.9738751,8.828699],[-7.9730421,8.828318],[-7.9721381,8.828389],[-7.9714721,8.827914],[-7.9714001,8.827509],[-7.9715911,8.826105],[-7.9713531,8.825582],[-7.9706871,8.825391],[-7.9694731,8.825534],[-7.9687351,8.825891],[-7.9673311,8.82582],[-7.9667601,8.825249],[-7.9666431,8.824453],[-7.9665301,8.824107],[-7.9662311,8.823602],[-7.9656851,8.822936],[-7.9653091,8.821656],[-7.9648431,8.82138],[-7.9645731,8.820761],[-7.9642081,8.819393],[-7.9632671,8.818713],[-7.9623901,8.817287],[-7.9616491,8.816207],[-7.9614311,8.815802],[-7.9612821,8.815357],[-7.9610021,8.814922],[-7.9605261,8.814589],[-7.9596691,8.814636],[-7.9587421,8.814446],[-7.9573741,8.813848],[-7.9563971,8.812582],[-7.9550291,8.812038],[-7.9542211,8.811472],[-7.9535701,8.81072],[-7.9530821,8.809865],[-7.9518931,8.809368],[-7.9511271,8.808997],[-7.9512221,8.808188],[-7.9514131,8.807545],[-7.9512461,8.806689],[-7.9507941,8.806094],[-7.9501521,8.805547],[-7.9498191,8.804595],[-7.9493851,8.803718],[-7.9489921,8.802676],[-7.9494531,8.801567],[-7.9493881,8.800163],[-7.9492831,8.799549],[-7.9488691,8.799186],[-7.9485141,8.798927],[-7.9482301,8.798779],[-7.9487141,8.797876],[-7.9489821,8.795742],[-7.9491511,8.794873],[-7.9496031,8.794139],[-7.9503221,8.793824],[-7.9497571,8.7923],[-7.9494781,8.791719],[-7.9490241,8.790978],[-7.9495691,8.790247],[-7.9490401,8.789391],[-7.9487471,8.789114],[-7.9486141,8.788675],[-7.9478441,8.788235],[-7.9464001,8.788098],[-7.9458571,8.787561],[-7.9448281,8.786845],[-7.9448521,8.786392],[-7.9448041,8.785917],[-7.9443761,8.785702],[-7.9437101,8.785512],[-7.9430671,8.785417],[-7.9418301,8.785774],[-7.9413541,8.785679],[-7.9407121,8.78575],[-7.9401171,8.786202],[-7.9397831,8.786678],[-7.9392361,8.786726],[-7.9386421,8.786131],[-7.9386181,8.785226],[-7.9376901,8.784227],[-7.9364851,8.782048],[-7.9354321,8.780682],[-7.9352631,8.780943],[-7.9338741,8.779868],[-7.9328961,8.778439],[-7.9328591,8.777636],[-7.9320932,8.776952],[-7.9316041,8.7765152],[-7.9306981,8.7764237],[-7.9303072,8.7767023],[-7.9299142,8.7770665],[-7.9292276,8.7773762],[-7.9279249,8.7771082],[-7.9279331,8.777532],[-7.9274316,8.7774479],[-7.9271889,8.7774071],[-7.9254689,8.7752828],[-7.9250234,8.7755982],[-7.9244521,8.7753809],[-7.9239051,8.7756313],[-7.9236905,8.7751846],[-7.9231731,8.774996],[-7.9224387,8.7753781],[-7.9213792,8.7752569],[-7.9209852,8.7750813],[-7.9202925,8.7742813],[-7.919799,8.7742658],[-7.9192658,8.774547],[-7.9184295,8.7751813],[-7.9180575,8.7751796],[-7.9178456,8.7747878],[-7.9178296,8.7743253],[-7.9174858,8.7741729],[-7.9170253,8.77427],[-7.9172394,8.7747863],[-7.9169877,8.7751714],[-7.9151765,8.7749607],[-7.9140301,8.77483],[-7.9126551,8.774835],[-7.9120001,8.774753],[-7.9110371,8.774523],[-7.9098221,8.775058],[-7.9085581,8.77515],[-7.9076261,8.775636],[-7.9075281,8.776383],[-7.9072471,8.776865],[-7.9060091,8.77682],[-7.9052571,8.777814],[-7.9044611,8.778267],[-7.9034387,8.7782441],[-7.9022191,8.7774377],[-7.9008661,8.7776905],[-7.9003611,8.7778888],[-7.8997452,8.7788812],[-7.8994761,8.779386],[-7.8988391,8.779881],[-7.8980401,8.780111],[-7.8975205,8.7803405],[-7.8974087,8.7814051],[-7.8969646,8.7822732],[-7.8969353,8.7834493],[-7.8970985,8.7837516],[-7.8969938,8.784077],[-7.8967319,8.7844173],[-7.8962039,8.7846129],[-7.8962545,8.7855277],[-7.8961655,8.7864202],[-7.8955425,8.7876788],[-7.8955585,8.7889835],[-7.8954492,8.7894969],[-7.8951238,8.7896486],[-7.8946414,8.7894667],[-7.8939865,8.7898791],[-7.8936538,8.7896113],[-7.8935652,8.7890949],[-7.8930735,8.7888289],[-7.8923089,8.7887678],[-7.8915927,8.7885322],[-7.8908351,8.7879169],[-7.8900858,8.787544],[-7.8895666,8.7876774],[-7.8892954,8.7884061],[-7.8888961,8.7884392],[-7.8883425,8.7883084],[-7.88784,8.7889969],[-7.8869404,8.7885621],[-7.8861772,8.7883631],[-7.8858491,8.7889894],[-7.8853718,8.7891351],[-7.8842532,8.7890839],[-7.8833117,8.7887449],[-7.8824913,8.7888072],[-7.8820377,8.7886925],[-7.8817673,8.7897059],[-7.8811516,8.7898914],[-7.8806151,8.7897339],[-7.8803507,8.7902583],[-7.8801418,8.7902718],[-7.8799307,8.7900425],[-7.879711,8.7900829],[-7.8794111,8.790612],[-7.8788131,8.790718],[-7.8783482,8.7906296],[-7.8781547,8.7903923],[-7.8777451,8.790424],[-7.8775131,8.791297],[-7.8772951,8.791417],[-7.8760361,8.790998],[-7.8758601,8.790562],[-7.8754291,8.790107],[-7.8750496,8.7896421],[-7.8743901,8.789244],[-7.8737095,8.789084],[-7.8729759,8.7895157],[-7.8716156,8.7898708],[-7.8710861,8.789789],[-7.8700539,8.7891893],[-7.8694341,8.789041],[-7.8692453,8.7889393],[-7.8689941,8.788153],[-7.8688003,8.7874481],[-7.8688996,8.7866458],[-7.8687421,8.7860675],[-7.8683237,8.7852038],[-7.8680562,8.7838366],[-7.8667464,8.7834729],[-7.8656495,8.7831092],[-7.8650956,8.7828499],[-7.8646422,8.7820347],[-7.8635909,8.7816405],[-7.8634015,8.7813322],[-7.862409,8.7808015],[-7.8614677,8.780431],[-7.8613937,8.7800594],[-7.8622307,8.7792917],[-7.8633617,8.7799297],[-7.8640355,8.7798224],[-7.8645814,8.779525],[-7.8645301,8.779118],[-7.8640525,8.7783665],[-7.8636264,8.7771722],[-7.8635485,8.7762814],[-7.8637901,8.7758279],[-7.8634388,8.7748475],[-7.8632396,8.7745728],[-7.8622289,8.7745189],[-7.8613105,8.7743212],[-7.8610508,8.7741023],[-7.8598793,8.773736],[-7.8585739,8.7738715],[-7.8583308,8.7744604],[-7.8580171,8.7746275],[-7.8563384,8.7747693],[-7.8556204,8.7743833],[-7.8544037,8.7741969],[-7.853121,8.7746195],[-7.8529376,8.7751173],[-7.851575,8.7758716],[-7.8510601,8.7765439],[-7.8508011,8.77655],[-7.8502336,8.7767881],[-7.8499221,8.77706],[-7.8493829,8.7773681],[-7.8484482,8.7771363],[-7.8480736,8.7769368],[-7.8480061,8.776611],[-7.8480641,8.775952],[-7.8479551,8.775619],[-7.8473868,8.7752362],[-7.8466494,8.7746399],[-7.8461925,8.7743385],[-7.8456496,8.774042],[-7.845464,8.7737044],[-7.8450418,8.7734296],[-7.8444612,8.7732096],[-7.8442902,8.7733861],[-7.8443841,8.7740288],[-7.8440147,8.7740829],[-7.8435091,8.774347],[-7.8429874,8.7746577],[-7.8424506,8.774771],[-7.842182,8.7744937],[-7.8421268,8.774061],[-7.8417777,8.7731591],[-7.8413689,8.7729533],[-7.8410522,8.7730793],[-7.8408223,8.773093],[-7.8392148,8.7723281],[-7.8388225,8.7722828],[-7.8375517,8.7723803],[-7.8359673,8.7720829],[-7.8355193,8.7720614],[-7.8351193,8.771922],[-7.8342155,8.770886],[-7.8339355,8.7698162],[-7.833755,8.7694835],[-7.8329276,8.7692604],[-7.8323629,8.769507],[-7.8315549,8.768794],[-7.8307331,8.768576],[-7.8306394,8.7679813],[-7.8308161,8.767568],[-7.8306381,8.766762],[-7.8306742,8.7663141],[-7.8312772,8.7654585],[-7.8316136,8.7638713],[-7.8318824,8.7630765],[-7.8324297,8.7625425],[-7.8331411,8.761417],[-7.833015,8.7596343],[-7.8328184,8.7593827],[-7.8321948,8.7598314],[-7.8314746,8.7599267],[-7.8315261,8.759033],[-7.8313268,8.7580834],[-7.8313199,8.7576306],[-7.8311751,8.7574784],[-7.8308574,8.7574725],[-7.8305661,8.758077],[-7.8299781,8.758579],[-7.8296341,8.7592351],[-7.8289844,8.7595766],[-7.8283146,8.7593967],[-7.8276049,8.7594508],[-7.8262406,8.7593061],[-7.8256936,8.7593674],[-7.825347,8.7595354],[-7.8250984,8.7597629],[-7.8248555,8.7603281],[-7.8246424,8.7605505],[-7.8242563,8.7605089],[-7.823896,8.7599363],[-7.8232459,8.7596505],[-7.8227411,8.7595298],[-7.821989,8.7595924],[-7.8217085,8.7597101],[-7.820683,8.7614105],[-7.8201465,8.7621336],[-7.8190207,8.7630468],[-7.8179611,8.7637151],[-7.8176357,8.7640637],[-7.8174236,8.7651118],[-7.8169899,8.7661236],[-7.8163677,8.7664728],[-7.8157902,8.7663887],[-7.8147435,8.7663523],[-7.8139394,8.7665241],[-7.812969,8.7663282],[-7.8124244,8.7660985],[-7.8122326,8.7661243],[-7.812153,8.7663094],[-7.8122565,8.7666098],[-7.8116008,8.7672363],[-7.8109961,8.767451],[-7.8107998,8.7676097],[-7.810079,8.7677875],[-7.8095506,8.7681276],[-7.8087868,8.7684985],[-7.8084966,8.7684103],[-7.8084364,8.7680708],[-7.8075299,8.7675632],[-7.8060506,8.767066],[-7.8052593,8.7670973],[-7.8041075,8.7667854],[-7.8035018,8.7663843],[-7.8033518,8.7663377],[-7.8032033,8.7664219],[-7.803176,8.7666237],[-7.8033681,8.7668727],[-7.8033231,8.7671075],[-7.8031958,8.7671624],[-7.8029326,8.7671438],[-7.8026671,8.7668555],[-7.8018574,8.7668256],[-7.8009182,8.7664646],[-7.8006114,8.7664596],[-7.8004242,8.7665495],[-7.7998296,8.7671054],[-7.7994532,8.7670764],[-7.7991681,8.7666846],[-7.799032,8.7665147],[-7.7986169,8.766542],[-7.7985088,8.7669742],[-7.7981347,8.7672035],[-7.7975814,8.7672894],[-7.7973031,8.7672032],[-7.7971358,8.7670332],[-7.7970611,8.7665617],[-7.795793,8.7664234],[-7.7955868,8.7664625],[-7.7951629,8.7663534],[-7.7946664,8.7660665],[-7.7939262,8.7657421],[-7.793155,8.7653013],[-7.7927948,8.76536],[-7.7902951,8.7660728],[-7.789658,8.7663884],[-7.7889117,8.7669998],[-7.7885813,8.7671858],[-7.7882315,8.7675261],[-7.7875455,8.7675286],[-7.7876401,8.766111],[-7.7877221,8.76487],[-7.7872921,8.762876],[-7.7866561,8.759415],[-7.7888595,8.7486459],[-7.7897801,8.744146],[-7.7904231,8.743093],[-7.7913011,8.741906],[-7.7764271,8.731537],[-7.7614741,8.730895],[-7.7597901,8.727831],[-7.7529011,8.715606],[-7.7519061,8.71384],[-7.7519501,8.712916],[-7.7544901,8.699449],[-7.7550001,8.69573],[-7.7334201,8.659901],[-7.7326881,8.658844],[-7.6920551,8.64935],[-7.6917951,8.648972],[-7.6889831,8.64713],[-7.6716421,8.618032],[-7.6726721,8.615159],[-7.6780681,8.603416],[-7.6773611,8.598785],[-7.6806371,8.587665],[-7.6814211,8.586678],[-7.6849671,8.583956],[-7.6863391,8.583399],[-7.6872401,8.582456],[-7.6878401,8.58104],[-7.6890841,8.579325],[-7.6921141,8.576802],[-7.6930791,8.575186],[-7.6948431,8.571544],[-7.6963011,8.567776],[-7.6966881,8.56632],[-7.6967041,8.562772],[-7.6963741,8.559728],[-7.6955951,8.556842],[-7.6591791,8.49871],[-7.6589281,8.496617],[-7.6599281,8.495247],[-7.6608091,8.494673],[-7.6612991,8.493727],[-7.6619941,8.491579],[-7.6619921,8.490788],[-7.6621911,8.48947],[-7.6625511,8.488842],[-7.6629981,8.488299],[-7.6637121,8.485944],[-7.6646951,8.484724],[-7.6640211,8.484064],[-7.6638261,8.482888],[-7.6638081,8.481257],[-7.6630521,8.47876],[-7.6631461,8.477979],[-7.6628351,8.477496],[-7.6627071,8.477085],[-7.6634581,8.476454],[-7.6642591,8.475974],[-7.6642921,8.475621],[-7.6640451,8.475236],[-7.6638931,8.475181],[-7.6637511,8.474635],[-7.6638061,8.474109],[-7.6642111,8.473332],[-7.6640691,8.472761],[-7.6639151,8.472554],[-7.6645001,8.472278],[-7.6646621,8.471829],[-7.6651911,8.470893],[-7.6656911,8.470586],[-7.6657421,8.470438],[-7.6661041,8.47049],[-7.6666231,8.470402],[-7.6670581,8.47041],[-7.6674741,8.469881],[-7.6679371,8.469647],[-7.6682611,8.469612],[-7.6686051,8.469792],[-7.6687031,8.470337],[-7.6692771,8.470148],[-7.6699471,8.47011],[-7.6705221,8.470025],[-7.6711481,8.469793],[-7.6713571,8.469501],[-7.6717151,8.468074],[-7.6722121,8.467811],[-7.6732781,8.467683],[-7.6738761,8.46703],[-7.6744041,8.466289],[-7.6744591,8.465821],[-7.6734281,8.464671],[-7.6731341,8.463993],[-7.6728231,8.461744],[-7.6726431,8.460912],[-7.6727811,8.460219],[-7.6727521,8.460028],[-7.6728001,8.458942],[-7.6729801,8.458259],[-7.6730151,8.457713],[-7.6731161,8.457275],[-7.6732141,8.456224],[-7.6727531,8.455326],[-7.6717501,8.454127],[-7.6715481,8.453036],[-7.6707451,8.451457],[-7.6707131,8.451044],[-7.6705861,8.450377],[-7.6710221,8.449234],[-7.6715868,8.4487919],[-7.6715323,8.4477909],[-7.6716301,8.446931],[-7.6721511,8.446225],[-7.6723491,8.445715],[-7.6725291,8.44538],[-7.6725951,8.445116],[-7.6730331,8.444534],[-7.6734041,8.443613],[-7.6738081,8.443198],[-7.6745261,8.442758],[-7.6749841,8.442599],[-7.6752131,8.442377],[-7.6754431,8.442251],[-7.6757211,8.442006],[-7.6759181,8.441513],[-7.6764841,8.441609],[-7.6766741,8.441493],[-7.6771707,8.4413608],[-7.6780944,8.4412612],[-7.6767961,8.439523],[-7.6766041,8.438992],[-7.6765601,8.438195],[-7.6764331,8.437279],[-7.6756911,8.436764],[-7.6756061,8.436133],[-7.6753391,8.435532],[-7.6753311,8.435071],[-7.6757871,8.434202],[-7.6754511,8.433881],[-7.6751591,8.433024],[-7.6754411,8.431735],[-7.6749761,8.43112],[-7.6746251,8.430751],[-7.6743301,8.429918],[-7.6736161,8.428345],[-7.6735321,8.427536],[-7.6736781,8.427202],[-7.6734971,8.426515],[-7.6728161,8.425602],[-7.6722681,8.425217],[-7.6716011,8.424931],[-7.6709331,8.424887],[-7.6705801,8.424774],[-7.6702731,8.424456],[-7.6693761,8.423984],[-7.6689091,8.423876],[-7.6688491,8.423654],[-7.6690591,8.423183],[-7.6694461,8.42322],[-7.6701301,8.422352],[-7.6690431,8.42084],[-7.6685801,8.420099],[-7.6683541,8.419357],[-7.6678881,8.418743],[-7.6675481,8.419044],[-7.6670181,8.418914],[-7.6664531,8.417664],[-7.6666601,8.417441],[-7.6660821,8.417159],[-7.6651711,8.41633],[-7.6653851,8.41537],[-7.6652671,8.414648],[-7.6649401,8.414241],[-7.6643171,8.413884],[-7.6640031,8.413404],[-7.6638171,8.412726],[-7.6632191,8.411621],[-7.6629781,8.410219],[-7.6627181,8.409335],[-7.6619501,8.407978],[-7.6612591,8.407541],[-7.6601261,8.407681],[-7.6598861,8.408241],[-7.6589661,8.40847],[-7.6583871,8.408717],[-7.6570781,8.408979],[-7.6557781,8.409337],[-7.6553381,8.409217],[-7.6549101,8.408981],[-7.6547701,8.40836],[-7.6552301,8.407771],[-7.6551871,8.406983],[-7.6552854,8.406297],[-7.6553671,8.405728],[-7.6550711,8.404725],[-7.6548101,8.404148],[-7.6540741,8.403761],[-7.6532861,8.403953],[-7.6526091,8.4031],[-7.6521381,8.403177],[-7.6517001,8.402711],[-7.6509821,8.402693],[-7.6500911,8.401766],[-7.6497991,8.401648],[-7.6493541,8.400875],[-7.6498671,8.400245],[-7.6495591,8.399199],[-7.6490121,8.398676],[-7.6492971,8.398217],[-7.6492001,8.397821],[-7.6493691,8.397245],[-7.6496611,8.396669],[-7.6491571,8.39576],[-7.6493521,8.394704],[-7.6487451,8.393552],[-7.6489011,8.392936],[-7.6482881,8.391317],[-7.6484401,8.390595],[-7.6479401,8.389782],[-7.6479051,8.38925],[-7.6482192,8.3884951],[-7.6479011,8.3873222],[-7.6476122,8.3870642],[-7.6469809,8.3867785],[-7.6467458,8.3864662],[-7.646907,8.3857353],[-7.6468197,8.3853101],[-7.6464771,8.3850642],[-7.6463697,8.3843998],[-7.6460137,8.384134],[-7.6456107,8.3841606],[-7.645107,8.3844662],[-7.6447578,8.3842403],[-7.644563,8.3838416],[-7.6438578,8.3832769],[-7.6434481,8.3824131],[-7.642978,8.3821074],[-7.642387,8.3820941],[-7.6419437,8.3817619],[-7.6414131,8.3810377],[-7.6410974,8.3807054],[-7.6406072,8.3807387],[-7.6402512,8.3805061],[-7.6395661,8.3805526],[-7.6386997,8.3804862],[-7.6381994,8.3803201],[-7.6379436,8.3779922],[-7.6379223,8.3772324],[-7.6384094,8.3761094],[-7.6406984,8.3751698],[-7.6435224,8.3748105],[-7.6448749,8.3748628],[-7.6455667,8.3752722],[-7.648648,8.3776183],[-7.6500154,8.3778296],[-7.6509522,8.3775041],[-7.6519655,8.3764982],[-7.653402,8.3758728],[-7.6547495,8.3740389],[-7.6558192,8.3737438],[-7.6571622,8.3739658],[-7.6583076,8.3736409],[-7.6592051,8.3738557],[-7.6610031,8.3778821],[-7.6650945,8.3825099],[-7.6661443,8.3825157],[-7.667514,8.3820375],[-7.6704654,8.3816529],[-7.6719973,8.3779226],[-7.6771314,8.3761363],[-7.678567,8.3759942],[-7.6814422,8.3752758],[-7.6822541,8.3755969],[-7.682885,8.3765022],[-7.6831358,8.377206],[-7.6855545,8.3796062],[-7.6867064,8.3797509],[-7.6876251,8.379608],[-7.6891695,8.3785129],[-7.6905537,8.3778031],[-7.6910988,8.3766063],[-7.6936332,8.3765623],[-7.6952346,8.3758572],[-7.6963059,8.3756765],[-7.6974769,8.3747968],[-7.6993745,8.375848],[-7.7015574,8.3766813],[-7.7029155,8.3777696],[-7.704775,8.3780722],[-7.7048491,8.3780843],[-7.7067248,8.3787462],[-7.7085054,8.3795321],[-7.7102551,8.3795553],[-7.7134079,8.3800086],[-7.7144943,8.3802884],[-7.716147,8.3803919],[-7.7170256,8.3817194],[-7.7186236,8.3810878],[-7.7199918,8.3799669],[-7.7223467,8.380477],[-7.7232453,8.381025],[-7.7237652,8.3818476],[-7.7243813,8.3819046],[-7.7252559,8.3813811],[-7.7259754,8.3803082],[-7.7285429,8.3806777],[-7.7292941,8.3804479],[-7.729755,8.3801556],[-7.734866,8.3798534],[-7.735969,8.3785815],[-7.7370008,8.3785704],[-7.738498,8.3782698],[-7.739817,8.3783921],[-7.7401376,8.3777841],[-7.740498,8.3775311],[-7.7419182,8.3783815],[-7.74276,8.3795803],[-7.7430717,8.3805459],[-7.7442584,8.3818441],[-7.7459104,8.3828924],[-7.7466755,8.3842247],[-7.7478169,8.3854378],[-7.7482929,8.3864488],[-7.7491094,8.3888432],[-7.7496338,8.3908416],[-7.7500367,8.3922159],[-7.7526514,8.3937353],[-7.7535383,8.3945732],[-7.7543428,8.3958409],[-7.7560105,8.3975515],[-7.756358,8.3983011],[-7.75653,8.3993357],[-7.7565493,8.4012068],[-7.7573566,8.4040114],[-7.7572428,8.404865],[-7.756616,8.4061862],[-7.7555663,8.408001],[-7.755703,8.4090245],[-7.7560602,8.4097798],[-7.7570685,8.4112866],[-7.7581313,8.4133327],[-7.7583977,8.4145074],[-7.7590479,8.4163239],[-7.759902,8.4177947],[-7.7609779,8.4185393],[-7.7628088,8.41896],[-7.7633245,8.4198285],[-7.7639516,8.4205659],[-7.764492,8.4223747],[-7.7644324,8.4230774],[-7.7632323,8.4252829],[-7.7632734,8.426056],[-7.7644727,8.4284467],[-7.7650405,8.4302543],[-7.7665589,8.4315934],[-7.7674311,8.4319241],[-7.7684312,8.4328804],[-7.7688128,8.4335272],[-7.7688609,8.4341952],[-7.768474,8.4352431],[-7.7680894,8.4359252],[-7.7681079,8.4363557],[-7.7685103,8.4373671],[-7.7691174,8.4379],[-7.7698076,8.43821],[-7.7712513,8.439686],[-7.771992,8.4408555],[-7.772111,8.4420395],[-7.7724335,8.4426279],[-7.7736072,8.4433728],[-7.7740811,8.444291],[-7.7757877,8.448885],[-7.7762354,8.4492313],[-7.7771859,8.4497698],[-7.777722,8.4501853],[-7.7779214,8.4509927],[-7.7783144,8.4543365],[-7.7782984,8.4550468],[-7.778025,8.4562436],[-7.7786034,8.4572249],[-7.779513,8.4594574],[-7.7793173,8.4615745],[-7.7799047,8.4627324],[-7.7804141,8.4631504],[-7.7804578,8.4644297],[-7.7810943,8.4653981],[-7.7822482,8.4660163],[-7.7832063,8.4668952],[-7.7834058,8.4678615],[-7.7843835,8.4699935],[-7.7856829,8.4731279],[-7.7863964,8.4749716],[-7.7878997,8.4766296],[-7.7892495,8.4768882],[-7.7905679,8.4766128],[-7.7919034,8.4757811],[-7.7928468,8.4758264],[-7.7943584,8.4765409],[-7.7954719,8.4775989],[-7.796885,8.4798611],[-7.7976829,8.4816679],[-7.7980744,8.4857062],[-7.7990237,8.486666],[-7.801378,8.4877817],[-7.802597,8.4874977],[-7.807138,8.4844585],[-7.8100699,8.4841124],[-7.812252,8.4841525],[-7.8138075,8.4853315],[-7.8137283,8.4886625],[-7.8144551,8.4902251],[-7.8174715,8.4932688],[-7.8185256,8.4941016],[-7.8204993,8.4947042],[-7.8218134,8.4946474],[-7.8238014,8.4950635],[-7.8244339,8.4950666],[-7.8259545,8.4956234],[-7.826517,8.495363],[-7.8269179,8.4948162],[-7.8276663,8.4906607],[-7.8281785,8.489147],[-7.8276006,8.4876048],[-7.8276251,8.4871707],[-7.828776,8.4860234],[-7.8299021,8.4843375],[-7.8297976,8.4836007],[-7.8290001,8.4825946],[-7.8281229,8.4821002],[-7.8271853,8.4811604],[-7.827216,8.4799418],[-7.8281683,8.4776271],[-7.8286102,8.4755965],[-7.8295661,8.475295],[-7.8307613,8.4753224],[-7.8324072,8.4748773],[-7.8335713,8.4746842],[-7.8353018,8.4734194],[-7.8352902,8.4726676],[-7.8348815,8.4715787],[-7.8341391,8.4706146],[-7.8320265,8.468273],[-7.8315417,8.4673897],[-7.8310569,8.4652629],[-7.8303609,8.4625149],[-7.8292169,8.461193],[-7.8283456,8.4596519],[-7.827643,8.4592848],[-7.8267323,8.4592926],[-7.8260872,8.4597466],[-7.8255813,8.4596091],[-7.8254391,8.4593173],[-7.8256661,8.4582951],[-7.8264624,8.457016],[-7.827929,8.4553917],[-7.8280525,8.4546243],[-7.827777,8.4524271],[-7.8277778,8.4515229],[-7.8279197,8.4505401],[-7.8285585,8.448634],[-7.8286121,8.4480168],[-7.828255,8.447321],[-7.8276548,8.4467794],[-7.8271288,8.4465012],[-7.8263539,8.4463472],[-7.8250412,8.4465398],[-7.8235788,8.4472809],[-7.8229176,8.4471914],[-7.8223358,8.4468231],[-7.8229589,8.4431968],[-7.8256187,8.441967],[-7.8273795,8.4406011],[-7.8283827,8.4399705],[-7.8285172,8.438853],[-7.8292109,8.4377255],[-7.8301349,8.4370746],[-7.8307282,8.4361357],[-7.8319029,8.434982],[-7.8338498,8.4336851],[-7.8350408,8.4322944],[-7.8356192,8.4301841],[-7.8374814,8.4281883],[-7.8379906,8.42657],[-7.8400875,8.427115],[-7.8408955,8.4282741],[-7.8418678,8.4282482],[-7.8439934,8.4265161],[-7.8460316,8.42686],[-7.8470168,8.427613],[-7.8488383,8.4279671],[-7.8497545,8.4290523],[-7.8498738,8.4304761],[-7.8505615,8.4306241],[-7.8526175,8.4299977],[-7.8544004,8.4279657],[-7.8555184,8.4271627],[-7.8560791,8.4260678],[-7.856501,8.4256728],[-7.8574977,8.4256612],[-7.8587041,8.4264596],[-7.8605269,8.4265862],[-7.864957,8.4242112],[-7.8712457,8.4250956],[-7.872392,8.4254312],[-7.8737587,8.4261616],[-7.8742277,8.4270926],[-7.8752411,8.4275869],[-7.8759986,8.4276431],[-7.8767346,8.4272033],[-7.877257,8.4262386],[-7.8775093,8.4247774],[-7.8777745,8.4222525],[-7.8783319,8.4212765],[-7.8800392,8.4206166],[-7.8809604,8.4206113],[-7.8814789,8.4212007],[-7.8818141,8.4243872],[-7.8815543,8.4253725],[-7.8808317,8.4256538],[-7.8801575,8.4255532],[-7.8797938,8.4260542],[-7.8799124,8.42697],[-7.8802146,8.4276738],[-7.8809569,8.4286811],[-7.8810257,8.4298826],[-7.8803829,8.4319969],[-7.8797443,8.4335311],[-7.8798165,8.4348042],[-7.8816004,8.4386618],[-7.8817246,8.4398837],[-7.8813995,8.4406011],[-7.8803778,8.4409502],[-7.8795485,8.4408749],[-7.8791455,8.4411201],[-7.8790724,8.4416104],[-7.8793355,8.4419501],[-7.879964,8.4421406],[-7.8807096,8.4420492],[-7.8813737,8.4416144],[-7.8837686,8.4392535],[-7.8847826,8.437815],[-7.8857501,8.4369601],[-7.8874788,8.4358819],[-7.8903242,8.4365185],[-7.8926836,8.4377875],[-7.8953256,8.4397226],[-7.8960474,8.4404003],[-7.8971372,8.4417848],[-7.8988835,8.4425789],[-7.8998206,8.4410266],[-7.9049704,8.4394984],[-7.9073737,8.4405172],[-7.9064244,8.4446347],[-7.9063449,8.4460202],[-7.9059852,8.4477748],[-7.9060604,8.4501365],[-7.9059763,8.450795],[-7.9044687,8.4535363],[-7.9045041,8.4539369],[-7.9053317,8.4545504],[-7.9055626,8.4551302],[-7.9062646,8.4557123],[-7.9072934,8.4557297],[-7.9093864,8.4548012],[-7.9115224,8.4544792],[-7.9135643,8.453433],[-7.914821,8.4530185],[-7.9154209,8.4529063],[-7.916857,8.4531761],[-7.9187696,8.453401],[-7.9199532,8.4528252],[-7.9203721,8.4523605],[-7.9211126,8.4527202],[-7.921671,8.4531701],[-7.9218479,8.4535513],[-7.9216297,8.4540361],[-7.9198478,8.4549679],[-7.9194042,8.4556331],[-7.9193752,8.45651],[-7.9196023,8.4575092],[-7.9195114,8.4590751],[-7.9188537,8.4609903],[-7.9182339,8.4623799],[-7.9181642,8.463184],[-7.9183106,8.4638728],[-7.9180141,8.4645972],[-7.9162567,8.4660563],[-7.9154867,8.4656316],[-7.9149342,8.4654076],[-7.9131166,8.4666851],[-7.9129892,8.4674259],[-7.9135092,8.4689413],[-7.9133488,8.4698992],[-7.9134243,8.4707478],[-7.9130835,8.4712799],[-7.9122935,8.4715459],[-7.9113154,8.4714145],[-7.910802,8.4708081],[-7.9099865,8.4682339],[-7.9099,8.4668492],[-7.9108608,8.464526],[-7.9106781,8.4632642],[-7.910373,8.4624417],[-7.9098988,8.462092],[-7.9090962,8.4618828],[-7.9074026,8.4618104],[-7.9066733,8.4621874],[-7.9065697,8.4627051],[-7.9066941,8.4632222],[-7.9070957,8.4638681],[-7.9076017,8.4648948],[-7.9076614,8.4657203],[-7.9074666,8.4678757],[-7.9075995,8.4691788],[-7.9071166,8.4700675],[-7.9056256,8.470797],[-7.9056329,8.4713152],[-7.9061,8.4718713],[-7.9079913,8.4722913],[-7.9090674,8.4727854],[-7.9099805,8.4736215],[-7.9109017,8.4746813],[-7.9115097,8.4766705],[-7.9117033,8.4779508],[-7.9115064,8.4795333],[-7.9116298,8.4798727],[-7.9119883,8.4800765],[-7.9133123,8.4799522],[-7.9139418,8.4802063],[-7.9144734,8.4810735],[-7.91462,8.4820826],[-7.9147014,8.4837243],[-7.9142239,8.4862737],[-7.9152701,8.4869341],[-7.9166272,8.4871517],[-7.9174882,8.4869952],[-7.9180796,8.4865986],[-7.9186811,8.4852861],[-7.9192983,8.4851073],[-7.920538,8.4853848],[-7.9208436,8.4858571],[-7.9201275,8.4869952],[-7.9185424,8.4881968],[-7.9180756,8.4889132],[-7.9164046,8.488762],[-7.9141636,8.488315],[-7.9121375,8.4870949],[-7.9112875,8.486886],[-7.9107778,8.486497],[-7.9102114,8.4865953],[-7.9096658,8.4869594],[-7.9089762,8.4880317],[-7.9078887,8.490266],[-7.9089628,8.4913912],[-7.9138994,8.4941291],[-7.9151431,8.4942501],[-7.918354,8.4934153],[-7.9188814,8.4940087],[-7.9189067,8.4945442],[-7.9191247,8.495102],[-7.9195774,8.4953571],[-7.9208009,8.4953035],[-7.9214219,8.4955396],[-7.92171,8.4959457],[-7.9222359,8.4973702],[-7.9235221,8.4984977],[-7.9239964,8.498746],[-7.925959,8.4983436],[-7.9263881,8.4979396],[-7.9269373,8.4979652],[-7.9271534,8.4983256],[-7.9271275,8.4989031],[-7.9265289,8.4996966],[-7.9265642,8.5002506],[-7.9269679,8.5009204],[-7.9284376,8.501427],[-7.9291878,8.5021322],[-7.9292154,8.5027645],[-7.9287689,8.5031616],[-7.9284982,8.5035257],[-7.9284115,8.504436],[-7.9287936,8.5051972],[-7.9292342,8.5053465],[-7.9299566,8.5057726],[-7.9301939,8.5062068],[-7.9302499,8.5068271],[-7.9305462,8.5078028],[-7.9307454,8.5088108],[-7.9310685,8.5097345],[-7.9316979,8.5099762],[-7.9332628,8.5096056],[-7.9338432,8.5091045],[-7.9345658,8.5069071],[-7.935651,8.5057734],[-7.9367791,8.5048929],[-7.9386451,8.5041525],[-7.9417634,8.5033829],[-7.9430436,8.5027887],[-7.9450636,8.4993871],[-7.9457003,8.4987217],[-7.9463294,8.4986654],[-7.9485521,8.499796],[-7.9503389,8.4996146],[-7.9517208,8.4997642],[-7.9525061,8.5005135],[-7.9535441,8.5006767],[-7.9555412,8.5006927],[-7.9562427,8.4997169],[-7.9565983,8.4990141],[-7.9564903,8.4973125],[-7.9567425,8.4960792],[-7.9570724,8.4960077],[-7.9576202,8.4962546],[-7.9586402,8.4972732],[-7.959576,8.498469],[-7.9605714,8.4991183],[-7.9612731,8.4999549],[-7.9623973,8.5020241],[-7.963348,8.5031054],[-7.9641124,8.5047331],[-7.9639545,8.5056968],[-7.963705,8.5063286],[-7.963855,8.5066164],[-7.9642894,8.5067729],[-7.9650427,8.5061933],[-7.9659098,8.5051732],[-7.9667912,8.503639],[-7.9679275,8.5031484],[-7.9690069,8.5026109],[-7.9692897,8.501967],[-7.9688131,8.5010165],[-7.9689022,8.5004276],[-7.9693645,8.5002805],[-7.9713377,8.5006996],[-7.9743406,8.5018733],[-7.9754043,8.5026212],[-7.9761423,8.5027046],[-7.9766106,8.502271],[-7.9774607,8.5004104],[-7.9767774,8.4972568],[-7.9761358,8.4942172],[-7.9762377,8.4923209],[-7.9758758,8.491197],[-7.9750283,8.4900198],[-7.9750918,8.4895727],[-7.9754882,8.4892798],[-7.9767733,8.4891195],[-7.9783205,8.489178],[-7.9797204,8.489514],[-7.9807771,8.4898511],[-7.9817823,8.4907271],[-7.9824251,8.490416],[-7.9832445,8.4894837],[-7.9836781,8.4891825],[-7.9860221,8.4886842],[-7.9871635,8.4881987],[-7.9877506,8.488386],[-7.9885001,8.4905684],[-7.9895812,8.4912539],[-7.9912144,8.4917244],[-7.9924809,8.492679],[-7.994713,8.4938776],[-7.9968956,8.4945111],[-7.9979825,8.4946775],[-7.9987228,8.4950702],[-7.999152,8.495675],[-7.9998171,8.496439],[-8.0004287,8.4969059],[-8.0012763,8.4970544],[-8.0016303,8.4967043],[-8.0018449,8.496057],[-8.0019522,8.4951869],[-8.0019307,8.4942637],[-8.0016303,8.4934573],[-8.0013621,8.4928524],[-8.0013943,8.4922051],[-8.0017805,8.4917489],[-8.0028749,8.4912395],[-8.0038297,8.4903588],[-8.0046129,8.4898388],[-8.0052567,8.4898919],[-8.0057287,8.4901466],[-8.0061793,8.4909106],[-8.006984,8.491717],[-8.0084968,8.4919929],[-8.0098057,8.4927994],[-8.011533,8.4927994],[-8.0127702,8.4932986],[-8.01427,8.4945321],[-8.015466,8.4959429],[-8.0168438,8.4982429],[-8.017273,8.5005773],[-8.0177733,8.5009409],[-8.018539,8.5009805],[-8.0234099,8.4986249],[-8.0246827,8.4984791],[-8.0256916,8.4990055],[-8.0266342,8.4997306],[-8.027795,8.499982],[-8.0288456,8.4996956],[-8.0298086,8.4989326],[-8.0309149,8.4973006],[-8.0317626,8.4969258],[-8.0329407,8.4973162],[-8.0352673,8.4973954],[-8.0369992,8.4975533],[-8.0380218,8.4979451],[-8.0389731,8.4987871],[-8.0407722,8.4993309],[-8.0414294,8.5002869],[-8.0421524,8.5008687],[-8.0437985,8.5013621],[-8.0447958,8.5008144],[-8.0456524,8.5011094],[-8.0475498,8.5013354],[-8.0480556,8.5023828],[-8.0478418,8.5036288],[-8.0479831,8.5044822],[-8.0484181,8.5054296],[-8.0491216,8.50613],[-8.0503676,8.5073702],[-8.0510674,8.5073996],[-8.0518007,8.507247],[-8.0527651,8.5072066],[-8.0538071,8.5074568],[-8.0544556,8.5073177],[-8.0553384,8.5068164],[-8.0575098,8.5051815],[-8.0581798,8.5052609],[-8.0589251,8.505688],[-8.0591923,8.5062643],[-8.0591584,8.5071353],[-8.0589489,8.5090327],[-8.0590485,8.5101461],[-8.0593843,8.5104898],[-8.0603452,8.5107677],[-8.0617738,8.5107303],[-8.062801,8.5111056],[-8.063482,8.5106975],[-8.06346,8.5097267],[-8.063802,8.5075467],[-8.0647142,8.5058177],[-8.0652842,8.5049532],[-8.0650942,8.5039007],[-8.0656263,8.5036376],[-8.0671085,8.5040511],[-8.0682815,8.5039776],[-8.0690629,8.503646],[-8.0695243,8.5031638],[-8.0698422,8.5021394],[-8.0698176,8.5013954],[-8.0696103,8.5007419],[-8.0698034,8.5003364],[-8.0703435,8.5002554],[-8.0712751,8.5006069],[-8.072042,8.5010001],[-8.0734666,8.501297],[-8.0745917,8.5016888],[-8.0772571,8.5021774],[-8.0792912,8.5027549],[-8.0820279,8.5029487],[-8.0831133,8.5031361],[-8.0841767,8.5035583],[-8.0855885,8.5046928],[-8.0862106,8.5057627],[-8.0861449,8.5063982],[-8.0854804,8.5090745],[-8.0856985,8.5094618],[-8.0871874,8.5097867],[-8.0876126,8.5100407],[-8.0877736,8.5103271],[-8.0877192,8.5106199],[-8.0878977,8.5109344],[-8.0883939,8.5109906],[-8.0901481,8.5087701],[-8.0903792,8.5082514],[-8.0905295,8.5073326],[-8.0904256,8.5064999],[-8.0905324,8.5056434],[-8.0910827,8.5042979],[-8.0914532,8.5037304],[-8.0915201,8.5031022],[-8.0914392,8.502421],[-8.0913257,8.5018091],[-8.0913859,8.5012308],[-8.0918979,8.500836],[-8.092607,8.4999662],[-8.0928503,8.4993223],[-8.0928,8.496947],[-8.0934616,8.4950668],[-8.0941103,8.4930059],[-8.0941735,8.4921636],[-8.0943609,8.4915601],[-8.0948941,8.4910699],[-8.0960735,8.4910316],[-8.0971027,8.4913581],[-8.0979108,8.4920135],[-8.0989018,8.4919765],[-8.0990966,8.4917329],[-8.0991601,8.4912846],[-8.0987188,8.4898421],[-8.0988591,8.4877181],[-8.0988636,8.4876358],[-8.0989351,8.4863653],[-8.1005308,8.4857641],[-8.1025444,8.4855386],[-8.1044441,8.4864029],[-8.1056978,8.486478],[-8.1063057,8.4846368],[-8.1073432,8.4840503],[-8.1073695,8.4840355],[-8.1086181,8.484076],[-8.109171,8.483785],[-8.1097659,8.4828366],[-8.1098091,8.4823544],[-8.1092262,8.4804135],[-8.1095351,8.4799772],[-8.1103021,8.4802421],[-8.1104624,8.4805973],[-8.1107951,8.4837129],[-8.1106244,8.4857408],[-8.1103236,8.4871442],[-8.1103135,8.4877503],[-8.1098935,8.4885385],[-8.1098189,8.4892625],[-8.1100559,8.4895946],[-8.1104459,8.4896997],[-8.1111082,8.4893928],[-8.1117049,8.4892322],[-8.1125104,8.4892231],[-8.1131792,8.4894469],[-8.114142,8.4902152],[-8.1144951,8.4903249],[-8.1153952,8.4902399],[-8.1159703,8.4899943],[-8.1177035,8.4895593],[-8.1181322,8.4889951],[-8.1183114,8.4865908],[-8.1188072,8.4857568],[-8.1200892,8.4856186],[-8.1208749,8.4859349],[-8.1213082,8.4863358],[-8.1218727,8.4867153],[-8.1230215,8.4869341],[-8.1238642,8.4872884],[-8.1243002,8.487622],[-8.1252423,8.488109],[-8.1262586,8.4881681],[-8.12731,8.4883591],[-8.1281004,8.4885897],[-8.1285714,8.4887271],[-8.1294563,8.4892791],[-8.1301174,8.4901362],[-8.1307155,8.4912501],[-8.1310858,8.4928603],[-8.1312738,8.4947551],[-8.1315179,8.4952819],[-8.1320776,8.4957256],[-8.1334697,8.4958459],[-8.1364116,8.4964656],[-8.1372464,8.4964846],[-8.1376818,8.4959103],[-8.1376265,8.4941771],[-8.1372243,8.4927257],[-8.1368129,8.4920197],[-8.1366927,8.4911531],[-8.1368827,8.4904357],[-8.1373265,8.4897307],[-8.1377857,8.4895402],[-8.138907,8.4895819],[-8.1396939,8.489783],[-8.1404329,8.489669],[-8.1420885,8.4874664],[-8.1424642,8.4873613],[-8.1438096,8.4876231],[-8.1453408,8.4877503],[-8.145959,8.4875291],[-8.1464423,8.4875302],[-8.147337,8.4877815],[-8.1477058,8.4875904],[-8.1477781,8.4871373],[-8.1474457,8.4866863],[-8.1467401,8.4861298],[-8.1451878,8.4855704],[-8.1442738,8.4850734],[-8.1442579,8.4846754],[-8.1446346,8.484455],[-8.1468927,8.4844285],[-8.1475184,8.4846235],[-8.1481895,8.4850926],[-8.1494443,8.4852881],[-8.1503472,8.4849522],[-8.1507538,8.4852935],[-8.1509611,8.4873809],[-8.1499113,8.4907367],[-8.1498899,8.4908053],[-8.1492183,8.4932232],[-8.1485198,8.4941265],[-8.1481974,8.4948705],[-8.1485467,8.4954551],[-8.149487,8.4957208],[-8.1527913,8.4955613],[-8.1558808,8.4956942],[-8.1572709,8.4961968],[-8.1580008,8.4956449],[-8.1593197,8.4938725],[-8.1598557,8.49282],[-8.1602723,8.4925462],[-8.1616971,8.4928025],[-8.1624277,8.4930937],[-8.1633715,8.4938841],[-8.1637022,8.4946804],[-8.1641532,8.4953715],[-8.1646282,8.4963397],[-8.165893,8.4977749],[-8.166688,8.4988982],[-8.1669141,8.4995225],[-8.1672728,8.5025507],[-8.1675869,8.5031293],[-8.1683173,8.5032105],[-8.1702748,8.5040271],[-8.1711048,8.5038911],[-8.1734724,8.5017329],[-8.1745441,8.5007166],[-8.1751828,8.5007667],[-8.1756767,8.5021714],[-8.175653,8.5033176],[-8.1760147,8.5037402],[-8.1772637,8.5045932],[-8.1784563,8.5053121],[-8.17947,8.5053809],[-8.1802808,8.5053352],[-8.1815449,8.5047279],[-8.1821086,8.5046873],[-8.1831118,8.5050958],[-8.1837754,8.5051009],[-8.1843607,8.5047859],[-8.1847577,8.504796],[-8.185695,8.5051548],[-8.1876418,8.5061062],[-8.1884704,8.5068201],[-8.1887768,8.5066506],[-8.1893793,8.5053217],[-8.1896726,8.503692],[-8.1901266,8.5028182],[-8.190281,8.5016722],[-8.1902519,8.5010618],[-8.1899304,8.5008532],[-8.1885398,8.5006125],[-8.1875817,8.4999446],[-8.1875215,8.499669],[-8.1879203,8.4988823],[-8.1881456,8.4982183],[-8.1889784,8.4975275],[-8.1899993,8.4952691],[-8.192444,8.493728],[-8.1930887,8.4925855],[-8.1947812,8.490513],[-8.1941902,8.4888656],[-8.1948887,8.4868728],[-8.1965812,8.4859428],[-8.1975787,8.4852542],[-8.1974594,8.4840767],[-8.1976202,8.4835969],[-8.1986718,8.4830126],[-8.1997523,8.482763],[-8.2010461,8.4817089],[-8.2012048,8.4803348],[-8.2018797,8.4802907],[-8.2024406,8.4810277],[-8.202895,8.480902],[-8.2032061,8.4806326],[-8.203338,8.4798234],[-8.2031542,8.4787171],[-8.2034866,8.4781933],[-8.2041657,8.4779415],[-8.205045,8.4778481],[-8.2058355,8.4761757],[-8.206585,8.475481],[-8.2084757,8.4754398],[-8.2092755,8.4747862],[-8.2108178,8.473427],[-8.2122499,8.4732786],[-8.2129263,8.4746723],[-8.214037,8.4746378],[-8.2156293,8.4743389],[-8.2163034,8.4736312],[-8.2168344,8.472664],[-8.2173519,8.4711876],[-8.2180167,8.4698433],[-8.2179361,8.4693905],[-8.2168873,8.4687018],[-8.2166483,8.4683367],[-8.2166408,8.4678401],[-8.2162993,8.4675136],[-8.2157404,8.4672775],[-8.2151708,8.4667078],[-8.2147905,8.4659094],[-8.2147531,8.464628],[-8.2145113,8.4637511],[-8.2155053,8.4633791],[-8.2172808,8.4637373],[-8.2200186,8.4650532],[-8.2213185,8.4651677],[-8.2224677,8.4646962],[-8.2246407,8.4641279],[-8.2248404,8.4637204],[-8.2247388,8.461986],[-8.2251746,8.4619134],[-8.2258713,8.4625846],[-8.2269123,8.4638937],[-8.2275032,8.4651],[-8.2275132,8.4655723],[-8.227283,8.4662251],[-8.2273483,8.4665947],[-8.2275779,8.466812],[-8.2283107,8.4666832],[-8.2284668,8.4670758],[-8.2278369,8.4678131],[-8.2277031,8.4681956],[-8.2278777,8.4685588],[-8.2275886,8.468817],[-8.227123,8.4688417],[-8.2268485,8.4686165],[-8.2267091,8.4678467],[-8.2262663,8.4675972],[-8.2259167,8.467714],[-8.2257653,8.4679618],[-8.2253773,8.4690854],[-8.2255528,8.4693273],[-8.2261365,8.4694274],[-8.2264849,8.4695829],[-8.2267285,8.4706394],[-8.2270223,8.47086],[-8.2276629,8.4703272],[-8.2283001,8.4694821],[-8.2283853,8.4686496],[-8.2287079,8.4683563],[-8.2296175,8.467945],[-8.2305555,8.4674311],[-8.2314341,8.4660988],[-8.2321312,8.4657835],[-8.2326563,8.4658994],[-8.233643,8.4659905],[-8.2343988,8.4657331],[-8.2354221,8.4651392],[-8.2358548,8.4645075],[-8.2368318,8.4617619],[-8.2380524,8.4596482],[-8.238103,8.4590422],[-8.2376971,8.4583103],[-8.237138,8.4571026],[-8.2361257,8.456336],[-8.23584,8.4560666],[-8.2347798,8.4557331],[-8.234539,8.4555198],[-8.2345466,8.4551877],[-8.234844,8.4541962],[-8.2352125,8.4536809],[-8.2355119,8.4528666],[-8.2359111,8.4524482],[-8.2363748,8.4516879],[-8.2377066,8.4511477],[-8.238062,8.4501738],[-8.2379863,8.4496909],[-8.2374323,8.4491049],[-8.2368795,8.4483872],[-8.2364767,8.4479924],[-8.2361294,8.4473424],[-8.2363263,8.4470837],[-8.2375175,8.4465854],[-8.2383295,8.4458647],[-8.2388154,8.4452901],[-8.2391157,8.4452041],[-8.2403038,8.445286],[-8.241367,8.4455744],[-8.2429618,8.4464225],[-8.2438193,8.447559],[-8.244248,8.4488991],[-8.243662,8.4507977],[-8.2445538,8.4535118],[-8.2455141,8.4547331],[-8.2460286,8.4557169],[-8.2468517,8.4556151],[-8.2478807,8.4549366],[-8.2496985,8.4548688],[-8.250796,8.4540206],[-8.2519621,8.4550723],[-8.2514819,8.4563276],[-8.2519621,8.4568025],[-8.2534026,8.4568704],[-8.2541915,8.4546313],[-8.2538485,8.45341],[-8.2554605,8.4525279],[-8.2565923,8.4529011],[-8.2573812,8.45341],[-8.25793,8.4526297],[-8.2588217,8.4509334],[-8.2602965,8.4516459],[-8.2636234,8.4507977],[-8.2635548,8.4491354],[-8.2629718,8.4482533],[-8.2630061,8.4472355],[-8.2638978,8.4466249],[-8.2641379,8.4458446],[-8.2651668,8.4454375],[-8.2652011,8.4449286],[-8.2647896,8.4443518],[-8.2648582,8.4435715],[-8.2654069,8.4434358],[-8.2657499,8.4449286],[-8.2666759,8.4452339],[-8.2668474,8.4445554],[-8.2662644,8.4438429],[-8.2665388,8.4430626],[-8.2671561,8.4433001],[-8.2678764,8.4440126],[-8.2699343,8.4456749],[-8.2718549,8.4452],[-8.2747703,8.4455053],[-8.2762451,8.4464892],[-8.2773426,8.4458446],[-8.2770339,8.4434697],[-8.2762451,8.4424519],[-8.2759021,8.4395003],[-8.2754905,8.4377022],[-8.2790575,8.436413],[-8.2802579,8.4370237],[-8.2793319,8.4385504],[-8.2795034,8.4402467],[-8.2789203,8.4409592],[-8.2791261,8.4415359],[-8.281527,8.4414002],[-8.2822815,8.4425877],[-8.284917,8.459261],[-8.3043022,8.4596871],[-8.3155025,8.4673567],[-8.3310107,8.4912168],[-8.3396263,8.4963295],[-8.3564268,8.4882344],[-8.3740888,8.4937731],[-8.3904585,8.4912168],[-8.4033819,8.4809912],[-8.4326751,8.4720436],[-8.4615375,8.4584088],[-8.4744609,8.4494607],[-8.4847997,8.4290071],[-8.4886767,8.4038647],[-8.5003078,8.3872442],[-8.5168929,8.3700506],[-8.4947076,8.334675],[-8.4796303,8.2933284],[-8.4641221,8.2724402],[-8.4919076,8.25283],[-8.5074157,8.2470746],[-8.5227084,8.2506984],[-8.5326164,8.2632747],[-8.5418782,8.2575195],[-8.5513554,8.2602905],[-8.5651404,8.2577326],[-8.5754792,8.2656194],[-8.5782793,8.2775558],[-8.5782793,8.2950335],[-8.5877564,8.3061164],[-8.5890488,8.3189041],[-8.5944336,8.3342488],[-8.6017568,8.3400029],[-8.6105879,8.3510846],[-8.6416041,8.3726078],[-8.6556045,8.3723947],[-8.6887747,8.3817708],[-8.7144062,8.3493797],[-8.7281912,8.3431996],[-8.7383146,8.3425602],[-8.7499457,8.3466093],[-8.756192,8.340216],[-8.7701924,8.3380849],[-8.7757926,8.3293471],[-8.7826851,8.3250847],[-8.7934546,8.3289208],[-8.7932392,8.3195435],[-8.7854852,8.3084609],[-8.7923777,8.2992962],[-8.8114889,8.2925748],[-8.8122504,8.2833813],[-8.8034167,8.2595675],[-8.8084428,8.2464543],[-8.8274763,8.2324406],[-8.836415,8.2319077],[-8.8427691,8.2377699],[-8.8554771,8.2429924],[-8.862585,8.2499203],[-8.8696929,8.2508795],[-8.8772316,8.2547164],[-8.8913397,8.2545032],[-8.9038323,8.2506663],[-8.912448,8.253544],[-8.9225713,8.2569545],[-8.9262504,8.2624432]]]]}]}
