# Supplementary material
Source: ML conference proceedings conference paper supplement (https://proceedings.neurips.cc/paper_files/paper/2022/hash/9d3faa41886997cfc2128b930077fa49-Abstract.html)
Supplement: Supplementary file 1 [file 9d3faa41886997cfc2128b930077fa49-Supplemental-Conference.zip › code/ebola/map/geojson/bo.geojson]

{"type":"GeometryCollection","geometries":[{"type":"MultiPolygon","coordinates":[[[[-12.1366383,7.8072021],[-12.1367688,7.7994267],[-12.1297981,7.7935534],[-12.1294058,7.789389],[-12.1330243,7.7769172],[-12.1366369,7.7654223],[-12.1298086,7.7565064],[-12.1170617,7.7328223],[-12.1091741,7.7202405],[-12.113536,7.7014528],[-12.1174127,7.6878767],[-12.1058718,7.6771225],[-12.0719537,7.6889484],[-12.0394431,7.6849764],[-12.0276485,7.6642201],[-12.0081372,7.6660391],[-11.9911869,7.6615936],[-11.9738795,7.6552021],[-11.9724421,7.6531076],[-11.9712494,7.650815],[-11.9707072,7.6477701],[-11.9717915,7.6457999],[-11.9729843,7.6421818],[-11.9751529,7.6384562],[-11.9778275,7.6370591],[-11.9816949,7.6356262],[-11.9854177,7.6353396],[-11.9889598,7.6373816],[-11.9926826,7.6394235],[-11.997533,7.6399241],[-12.0020809,7.6378632],[-12.0048459,7.6365807],[-12.0068073,7.6344342],[-12.0080059,7.6324632],[-12.0080176,7.6295728],[-12.0060913,7.6254489],[-12.0009272,7.6081493],[-11.9975636,7.5961035],[-11.9507166,7.6047304],[-11.9708667,7.5854785],[-11.9903299,7.5536135],[-11.9846872,7.5455406],[-11.9743384,7.5361497],[-11.9600267,7.5302118],[-11.9499311,7.5304217],[-11.938313,7.5307705],[-11.9323221,7.5306389],[-11.9252697,7.5310306],[-11.9199848,7.5343004],[-11.916424,7.5357194],[-11.9064168,7.5303617],[-11.8990055,7.5251568],[-11.8891904,7.5157918],[-11.8787831,7.5099942],[-11.869815,7.4990696],[-11.8648472,7.5138452],[-11.8524278,7.5187703],[-11.8449761,7.5347765],[-11.8424922,7.5507821],[-11.8487019,7.5618626],[-11.8499439,7.5827916],[-11.8251049,7.5951023],[-11.8027499,7.5852538],[-11.7890884,7.5852538],[-11.7952982,7.6184916],[-11.7779109,7.6320323],[-11.7803948,7.6603431],[-11.7555558,7.6714207],[-11.7344427,7.6541887],[-11.7370723,7.6428382],[-11.7448531,7.5871324],[-11.7235224,7.5527888],[-11.7227136,7.5526724],[-11.7218698,7.5501033],[-11.7217259,7.5489268],[-11.7197627,7.5492422],[-11.7180975,7.5487955],[-11.716058,7.5481935],[-11.7153671,7.5484658],[-11.7149487,7.5490603],[-11.7159823,7.5515494],[-11.7174313,7.5543952],[-11.7182547,7.5552678],[-11.7178508,7.5557566],[-11.7161889,7.5561974],[-11.7155506,7.5573179],[-11.7152222,7.5597386],[-11.7143307,7.5607351],[-11.7123361,7.561637],[-11.7114725,7.5619752],[-11.7109256,7.5625667],[-11.6964982,7.5813999],[-11.6726001,7.6308593],[-11.6592821,7.6321093],[-11.6454178,7.6345865],[-11.6229919,7.6360463],[-11.6095708,7.6371402],[-11.5956047,7.6306009],[-11.5847401,7.6322233],[-11.5729896,7.6664973],[-11.5366463,7.6680837],[-11.5198591,7.6887535],[-11.5117199,7.6892576],[-11.4847587,7.713455],[-11.4644106,7.7149673],[-11.4581645,7.7035337],[-11.4577088,7.695915],[-11.4537732,7.6923657],[-11.4532482,7.692759],[-11.453029,7.6931319],[-11.4528223,7.6940742],[-11.4528595,7.6945126],[-11.4530786,7.6950288],[-11.4532316,7.6953279],[-11.452967,7.6957458],[-11.4526446,7.6959711],[-11.4520616,7.695967],[-11.4513588,7.6958646],[-11.4506312,7.6961227],[-11.4499945,7.6964259],[-11.4495356,7.6967905],[-11.4490436,7.6972207],[-11.4485847,7.6974255],[-11.4480886,7.6976468],[-11.4476669,7.6976181],[-11.4474147,7.6972821],[-11.447485,7.6967782],[-11.4475635,7.6962948],[-11.4478199,7.695627],[-11.4479852,7.694996],[-11.4479398,7.6945781],[-11.4475139,7.6943856],[-11.4469021,7.6941192],[-11.4465093,7.6939513],[-11.4459718,7.6940332],[-11.4451409,7.6942831],[-11.4444876,7.6943405],[-11.4438303,7.694025],[-11.4433383,7.6937792],[-11.4427967,7.6934105],[-11.4425735,7.6928],[-11.4419823,7.692714],[-11.441511,7.6932384],[-11.4408702,7.6932793],[-11.4404071,7.6930827],[-11.4399069,7.6927959],[-11.4396878,7.693308],[-11.4397539,7.6939595],[-11.4396216,7.6946805],[-11.4393942,7.6955286],[-11.4392991,7.6964013],[-11.4395183,7.6971101],[-11.4397787,7.6975976],[-11.440002,7.6983638],[-11.4399813,7.6989988],[-11.4396423,7.6995355],[-11.439047,7.6997567],[-11.4384144,7.7000804],[-11.437786,7.7001869],[-11.4371865,7.7000312],[-11.4365664,7.699896],[-11.4358925,7.700064],[-11.4348507,7.6999001],[-11.434367,7.6996461],[-11.4336641,7.6998551],[-11.4331474,7.7003877],[-11.4326471,7.7007769],[-11.4322585,7.7010678],[-11.431688,7.7013505],[-11.4316177,7.701879],[-11.4312456,7.7018831],[-11.4307288,7.7021822],[-11.4304559,7.7027967],[-11.4301087,7.7031531],[-11.4295299,7.7037841],[-11.4291495,7.7040381],[-11.428732,7.7037964],[-11.4283516,7.7035137],[-11.4278555,7.7031736],[-11.4274338,7.7026246],[-11.4269956,7.7023255],[-11.4263796,7.7020429],[-11.425747,7.7019937],[-11.4251021,7.7021944],[-11.4246266,7.7027557],[-11.4241925,7.7032187],[-11.4239362,7.7037144],[-11.4238494,7.7040504],[-11.4239321,7.7046526],[-11.4238742,7.705177],[-11.4235972,7.7055253],[-11.4233409,7.7061111],[-11.4231631,7.7067216],[-11.423192,7.7070247],[-11.4233864,7.7075328],[-11.4232913,7.7081063],[-11.4231218,7.7087864],[-11.4231135,7.7094214],[-11.4230556,7.709868],[-11.4229399,7.7104252],[-11.422853,7.710966],[-11.4226794,7.7114699],[-11.422452,7.7117567],[-11.4220055,7.7116788],[-11.4217202,7.7115436],[-11.4213688,7.711347],[-11.4208438,7.7115477],[-11.4205254,7.7119492],[-11.4204676,7.7122729],[-11.4206081,7.7129161],[-11.4208727,7.7135347],[-11.4209099,7.7142516],[-11.4208645,7.7147187],[-11.4203725,7.7149358],[-11.4198474,7.7149563],[-11.4195374,7.7153496],[-11.4197523,7.7157921],[-11.4202278,7.7164353],[-11.4204304,7.7169842],[-11.4204552,7.7177749],[-11.4204097,7.7184181],[-11.419814,7.7194575],[-11.4203461,7.720089],[-11.4211061,7.7210218],[-11.421112,7.7217981],[-11.4205273,7.722308],[-11.4197614,7.7226672],[-11.4188084,7.7232176],[-11.4183757,7.7241446],[-11.4180366,7.7250426],[-11.4178203,7.7258306],[-11.4173175,7.7263172],[-11.416005,7.7244983],[-11.4148144,7.7262025],[-11.413756,7.7284311],[-11.4161373,7.7301354],[-11.4181218,7.7330194],[-11.4156082,7.7345925],[-11.415079,7.7370833],[-11.4113747,7.7368211],[-11.4125653,7.739574],[-11.4140206,7.739574],[-11.4156082,7.7441622],[-11.4109778,7.745342],[-11.4128299,7.746784],[-11.413756,7.7484882],[-11.4156082,7.7491436],[-11.4148144,7.7508477],[-11.411507,7.7518964],[-11.4111101,7.7547804],[-11.408861,7.7520275],[-11.4076704,7.752683],[-11.4075381,7.7547804],[-11.405289,7.7549114],[-11.4038338,7.7541249],[-11.4067161,7.7759095],[-11.4131557,7.7878708],[-11.4221884,7.7981351],[-11.4384668,7.8233342],[-11.4481322,7.8298858],[-11.4720412,7.8112389],[-11.4832326,7.8243422],[-11.479163,7.8404688],[-11.48425,7.8490358],[-11.4806891,7.8712083],[-11.4677005,7.8925469],[-11.4642089,7.898283],[-11.4598323,7.9054727],[-11.4492212,7.9096331],[-11.4354146,7.9150461],[-11.4028577,7.9387266],[-11.3657225,7.9664362],[-11.3643362,7.96879],[-11.3516284,7.9903636],[-11.3514788,7.9906175],[-11.3463918,8.0102638],[-11.3570746,8.0581161],[-11.3527768,8.0643354],[-11.3504614,8.0676859],[-11.3545311,8.0797737],[-11.3550628,8.0878457],[-11.3572554,8.1211301],[-11.3575833,8.126107],[-11.3769139,8.1689102],[-11.3697921,8.1814985],[-11.3764052,8.198618],[-11.3920626,8.2082786],[-11.4155753,8.2227854],[-11.4216797,8.2404065],[-11.4245502,8.2446677],[-11.4328711,8.25702],[-11.4460974,8.2620542],[-11.4725499,8.2842042],[-11.4852674,8.3330303],[-11.4959501,8.3461167],[-11.5315593,8.3531631],[-11.5478377,8.363229],[-11.5478377,8.3833602],[-11.5656423,8.4095292],[-11.5569943,8.4211033],[-11.5636075,8.432174],[-11.5590292,8.4467666],[-11.5773424,8.4563269],[-11.6024767,8.4963168],[-11.6445331,8.4983295],[-11.6791278,8.4909497],[-11.7218625,8.4963168],[-11.7408557,8.4768607],[-11.749674,8.4607583],[-11.7489957,8.4459972],[-11.7578139,8.4392874],[-11.7700238,8.4251965],[-11.7713804,8.4117761],[-11.7856253,8.3976842],[-11.8195417,8.3896315],[-11.8382081,8.3666725],[-11.8446399,8.358761],[-11.8273076,8.3437725],[-11.830487,8.3296165],[-11.8519479,8.3107409],[-11.8161798,8.2706274],[-11.7995046,8.2033638],[-11.8112744,8.1700583],[-11.8158131,8.153767],[-11.8265128,8.1612777],[-11.8726139,8.1628513],[-11.8861263,8.1455415],[-11.8964593,8.1242966],[-11.9107665,8.1101327],[-11.9155356,8.0833773],[-11.9240086,8.0772761],[-11.9242789,8.0770816],[-11.9195098,8.065277],[-11.8829469,8.0337964],[-11.8646654,8.026713],[-11.8503582,8.0117586],[-11.8336664,7.9810609],[-11.8479736,7.9865709],[-11.8908954,7.9794867],[-11.9012284,7.9889323],[-11.9242789,7.992868],[-11.9441501,8.0078231],[-11.9751491,8.0093973],[-11.9997893,8.0015263],[-12.0172759,8.0015263],[-12.0315832,7.9912937],[-12.0517867,7.9733441],[-12.0800171,7.9781636],[-12.0956878,7.9783369],[-12.1087681,7.9779867],[-12.1192212,7.9751634],[-12.1280917,7.9762952],[-12.1370141,7.9644715],[-12.1385506,7.9450439],[-12.1346967,7.9250069],[-12.1341959,7.8999532],[-12.1363109,7.8774328],[-12.1479725,7.8561786],[-12.1441074,7.8491621],[-12.1354962,7.8427522],[-12.1388834,7.822476],[-12.1366383,7.8072021]]]]}]}
