# Supplementary material
Source: ML conference proceedings conference paper supplement (https://proceedings.neurips.cc/paper_files/paper/2022/hash/9d3faa41886997cfc2128b930077fa49-Abstract.html)
Supplement: Supplementary file 1 [file 9d3faa41886997cfc2128b930077fa49-Supplemental-Conference.zip › code/ebola/map/geojson/boke.geojson]

{"type":"GeometryCollection","geometries":[{"type":"MultiPolygon","coordinates":[[[[-15.365088,10.6147922],[-15.3645945,10.61533],[-15.364337,10.6162369],[-15.364337,10.6173969],[-15.3644014,10.6178187],[-15.3649593,10.6180085],[-15.3655601,10.6174602],[-15.3660751,10.6169118],[-15.3665686,10.6164689],[-15.3667188,10.6161104],[-15.366354,10.6157519],[-15.3659249,10.6155409],[-15.3656244,10.6149926],[-15.3655815,10.6142966],[-15.3652597,10.6145075],[-15.365088,10.6147922]]],[[[-15.35128,10.6253373],[-15.3515267,10.625042],[-15.3515482,10.6247573],[-15.3513551,10.6244726],[-15.3511191,10.6243566],[-15.3508294,10.6243882],[-15.3505933,10.6245042],[-15.3504861,10.6247151],[-15.350529,10.624926],[-15.3506684,10.6251475],[-15.3508616,10.6253689],[-15.3511083,10.6254216],[-15.35128,10.6253373]]],[[[-15.0740265,10.8917638],[-15.0734914,10.8841671],[-15.0737304,10.8835136],[-15.0739342,10.8824969],[-15.0741702,10.8802422],[-15.0745404,10.8783246],[-15.0747397,10.8772506],[-15.0748664,10.8762057],[-15.0754016,10.8746105],[-15.0755896,10.8737001],[-15.0756658,10.8728469],[-15.0758046,10.8728426],[-15.0760285,10.8731548],[-15.0762255,10.8736385],[-15.0763823,10.873533],[-15.0764763,10.8727458],[-15.0764394,10.8718502],[-15.0763643,10.8713548],[-15.0762785,10.870649],[-15.0759673,10.8693635],[-15.0754845,10.8677568],[-15.0747979,10.8654124],[-15.0737947,10.8623884],[-15.0733066,10.8607235],[-15.0726736,10.8587796],[-15.0721479,10.8569777],[-15.0717509,10.8553499],[-15.0713289,10.8536264],[-15.0706887,10.8520675],[-15.0704205,10.8515092],[-15.0700718,10.8508505],[-15.0693584,10.8494228],[-15.068441,10.8481795],[-15.0671268,10.8465989],[-15.0637525,10.8423628],[-15.062331,10.8404925],[-15.0617815,10.8396755],[-15.0603247,10.8375473],[-15.059623,10.8364295],[-15.0581521,10.8339619],[-15.0577685,10.8333375],[-15.0575754,10.8330714],[-15.0561994,10.8310825],[-15.0548074,10.8292252],[-15.0528601,10.8267779],[-15.0515592,10.825068],[-15.050025,10.8230052],[-15.0492157,10.8218795],[-15.0467742,10.8185582],[-15.0441017,10.8152465],[-15.041782,10.8122994],[-15.0412113,10.8114975],[-15.0407714,10.8109521],[-15.0399962,10.8100801],[-15.0388831,10.808826],[-15.0382233,10.8080171],[-15.0366676,10.8060491],[-15.0334576,10.8022242],[-15.0320193,10.8005321],[-15.0302169,10.798448],[-15.0289267,10.7969146],[-15.0283796,10.7962165],[-15.0242493,10.7907652],[-15.0229642,10.78915],[-15.0205851,10.7862597],[-15.0195229,10.7850818],[-15.0184634,10.7838672],[-15.0176051,10.7828448],[-15.0168648,10.7820175],[-15.016264,10.7815064],[-15.0149605,10.7805842],[-15.0136542,10.779791],[-15.0125036,10.7791876],[-15.0113583,10.7784525],[-15.0110686,10.7782365],[-15.0107333,10.7780731],[-15.0104178,10.7779867],[-15.0086224,10.7776253],[-15.0068361,10.7770349],[-15.005621,10.7765923],[-15.0039795,10.7760021],[-15.0029951,10.7756147],[-15.0021449,10.7753645],[-15.0004551,10.7750245],[-14.9988645,10.7748216],[-14.9983093,10.7747109],[-14.9977112,10.7745133],[-14.9962735,10.7742182],[-14.9943477,10.77396],[-14.9926981,10.7736096],[-14.9906784,10.7731959],[-14.9891469,10.7728482],[-14.9868697,10.7723869],[-14.9842599,10.7719153],[-14.9827606,10.7716676],[-14.9806604,10.7713778],[-14.979507,10.7712066],[-14.9778307,10.7711011],[-14.9760165,10.7709938],[-14.9746817,10.770914],[-14.9731556,10.7707507],[-14.9716938,10.7704476],[-14.9698886,10.7699865],[-14.9671555,10.7694464],[-14.9662006,10.7692751],[-14.9647629,10.7689378],[-14.9639456,10.7686919],[-14.9634245,10.7685926],[-14.9628747,10.7685531],[-14.9623087,10.768669],[-14.9619278,10.7688009],[-14.9611956,10.7690143],[-14.9601844,10.769225],[-14.9595353,10.7694042],[-14.9586609,10.7696466],[-14.9577007,10.7698943],[-14.9564561,10.7701551],[-14.9551016,10.7703976],[-14.954761,10.7704503],[-14.9542192,10.7705952],[-14.953731,10.7708797],[-14.9529773,10.7715042],[-14.9526018,10.7721076],[-14.9524033,10.772798],[-14.9523014,10.7729772],[-14.9512956,10.7737994],[-14.9503595,10.7743473],[-14.9490935,10.7751167],[-14.9479509,10.7764078],[-14.947232,10.7775461],[-14.9471998,10.778168],[-14.9473715,10.7786422],[-14.948262,10.7796329],[-14.948262,10.77977],[-14.9480045,10.7803549],[-14.9477255,10.7808028],[-14.9474466,10.7810136],[-14.9470979,10.7812613],[-14.9462396,10.7816776],[-14.9458748,10.7818199],[-14.9454671,10.7820096],[-14.9453384,10.7821519],[-14.9453384,10.7823258],[-14.9454242,10.7825629],[-14.9456334,10.7827526],[-14.9457836,10.7829002],[-14.945848,10.7830477],[-14.9458319,10.7833218],[-14.9450058,10.7848025],[-14.9449414,10.78485],[-14.9447697,10.7848658],[-14.9444264,10.7848658],[-14.9442279,10.7849395],[-14.9440831,10.785066],[-14.9435681,10.7859619],[-14.9432623,10.7866838],[-14.9430049,10.7871791],[-14.942404,10.7880697],[-14.9420688,10.7884043],[-14.9418837,10.7885361],[-14.9416235,10.7886783],[-14.9412614,10.7888919],[-14.940894,10.7893265],[-14.9406526,10.7896796],[-14.9404755,10.7899246],[-14.9402958,10.7901881],[-14.939695,10.7909574],[-14.9395394,10.7913079],[-14.9393356,10.7916003],[-14.93907,10.7919323],[-14.9389896,10.792151],[-14.9389225,10.7924303],[-14.9390191,10.7928439],[-14.9307873,10.7944541],[-14.8911246,10.8080901],[-14.8678228,10.8261082],[-14.8316306,10.9195898],[-14.8222107,10.919103],[-14.8162613,10.8071161],[-14.7889931,10.8085771],[-14.7661871,10.8222125],[-14.7612292,10.8032202],[-14.780069,10.7837397],[-14.8028751,10.765232],[-14.7944468,10.722855],[-14.768666,10.6902157],[-14.7334653,10.6819335],[-14.7235497,10.678036],[-14.7156171,10.6580602],[-14.6980065,10.6328294],[-14.6595119,10.6191132],[-14.620657,10.6057866],[-14.6199812,10.6047847],[-14.6192087,10.6038093],[-14.6189405,10.6034982],[-14.6186401,10.6030711],[-14.6177281,10.6015788],[-14.6167892,10.6004083],[-14.6157755,10.5991059],[-14.6148849,10.5978562],[-14.6131469,10.5954359],[-14.6122241,10.5942284],[-14.6118111,10.5937697],[-14.6114892,10.5935007],[-14.6111084,10.5932582],[-14.6106577,10.5930947],[-14.6100409,10.5929945],[-14.6093702,10.5928891],[-14.6082062,10.5927098],[-14.6073049,10.5926307],[-14.60657,10.5926518],[-14.6064038,10.592752],[-14.6062481,10.5929682],[-14.6060497,10.5932213],[-14.6057708,10.5934164],[-14.6052235,10.59368],[-14.6048051,10.5938118],[-14.6041668,10.5940333],[-14.6035552,10.5941388],[-14.6028096,10.594202],[-14.6018386,10.5941915],[-14.6011037,10.5941915],[-14.600535,10.5941757],[-14.5998859,10.594144],[-14.599489,10.5940017],[-14.5990384,10.5939226],[-14.5985985,10.5939226],[-14.5984,10.5940597],[-14.5982766,10.594202],[-14.5980835,10.5943075],[-14.5976704,10.5943497],[-14.5969999,10.5944815],[-14.5962274,10.5945975],[-14.5956266,10.5946819],[-14.5950633,10.5948453],[-14.5945644,10.5950615],[-14.5942265,10.5952988],[-14.5936686,10.5955045],[-14.5931161,10.5956943],[-14.5923972,10.5958367],[-14.5917749,10.5959685],[-14.5912439,10.5961214],[-14.5906162,10.596211],[-14.5900691,10.5962901],[-14.5898277,10.5963956],[-14.5900323,10.5917771],[-14.5913305,10.5913236],[-14.5926332,10.5908853],[-14.5931698,10.590569],[-14.5950642,10.5892987],[-14.5957861,10.5890154],[-14.5979974,10.5880606],[-14.6000145,10.5871747],[-14.6021881,10.5858818],[-14.6038986,10.5844311],[-14.604435,10.5839881],[-14.6050358,10.5832815],[-14.6055293,10.5824484],[-14.6059049,10.5819632],[-14.6063876,10.581689],[-14.6068597,10.5815941],[-14.6076215,10.5814043],[-14.6080828,10.5810773],[-14.6084154,10.5806977],[-14.6087372,10.5801387],[-14.6091558,10.5795903],[-14.6097565,10.5794532],[-14.6101749,10.5794848],[-14.6105504,10.579411],[-14.6108186,10.5792528],[-14.6110976,10.578852],[-14.6113981,10.5783458],[-14.611752,10.5778079],[-14.6120955,10.577481],[-14.6126747,10.5773755],[-14.6131683,10.5773017],[-14.6138764,10.5772279],[-14.6140909,10.577249],[-14.614252,10.5770802],[-14.6143703,10.5763928],[-14.6142949,10.5759095],[-14.6141554,10.5753189],[-14.6141246,10.5745303],[-14.6141982,10.5742643],[-14.6145237,10.5738912],[-14.6146609,10.5737827],[-14.6153932,10.5730871],[-14.6161081,10.5724081],[-14.6167303,10.5723448],[-14.6178247,10.5722393],[-14.6188534,10.5722954],[-14.6198632,10.5720495],[-14.6205713,10.5720495],[-14.6216959,10.5723482],[-14.6218318,10.5723131],[-14.6218962,10.5723026],[-14.6220356,10.5722446],[-14.6221054,10.5721075],[-14.6221751,10.5719124],[-14.6223629,10.5717225],[-14.6225131,10.5716698],[-14.6226096,10.5716803],[-14.622733,10.5717278],[-14.6228886,10.5717594],[-14.623071,10.5717225],[-14.6231568,10.5716276],[-14.6232426,10.571559],[-14.6232319,10.5714905],[-14.6232158,10.5713587],[-14.6231192,10.5712796],[-14.6228925,10.5711671],[-14.6228027,10.571095],[-14.6227706,10.5710528],[-14.6227706,10.5709368],[-14.6228296,10.5708999],[-14.6228725,10.5708788],[-14.6230227,10.5708471],[-14.6232212,10.5707944],[-14.6232426,10.5707206],[-14.6231961,10.570645],[-14.6229529,10.5705993],[-14.622733,10.5705887],[-14.6225613,10.5704991],[-14.622438,10.5703936],[-14.6223146,10.5702038],[-14.6222663,10.5699718],[-14.6224165,10.5698136],[-14.6226203,10.5697292],[-14.6227062,10.5696923],[-14.6228725,10.5696764],[-14.6231031,10.5697503],[-14.6232626,10.569719],[-14.6233767,10.5696343],[-14.6233928,10.5695763],[-14.6233553,10.5694286],[-14.6232855,10.5693179],[-14.6231836,10.5692018],[-14.6230441,10.5690858],[-14.6228617,10.5689962],[-14.6225882,10.5688538],[-14.6224594,10.5687905],[-14.6223414,10.5687378],[-14.6221966,10.5686587],[-14.622159,10.5684899],[-14.6221966,10.568395],[-14.6222556,10.5683423],[-14.6224219,10.5683528],[-14.622556,10.5683054],[-14.6226364,10.5681472],[-14.6226794,10.5679099],[-14.6226633,10.5676884],[-14.6225238,10.5675407],[-14.622336,10.5674194],[-14.6222609,10.5673034],[-14.6222395,10.5671768],[-14.6222448,10.5670661],[-14.6222234,10.5668499],[-14.6222341,10.5666917],[-14.6222127,10.5665071],[-14.6221858,10.5663595],[-14.6221536,10.5662382],[-14.6221322,10.5661274],[-14.6221536,10.5660589],[-14.6221966,10.5660536],[-14.6223468,10.5660325],[-14.6224809,10.5660325],[-14.6228671,10.5660536],[-14.6232641,10.56608],[-14.6236557,10.5661063],[-14.6237308,10.5661222],[-14.6238273,10.5661063],[-14.6239293,10.5660958],[-14.6240366,10.56608],[-14.6241278,10.5660905],[-14.6241921,10.56608],[-14.624337,10.5659745],[-14.6244335,10.5658479],[-14.6244872,10.5656265],[-14.6245569,10.5654472],[-14.6246427,10.5652679],[-14.6246642,10.5652204],[-14.6246803,10.5650569],[-14.6246481,10.5648143],[-14.6251632,10.564461],[-14.6253144,10.5643947],[-14.6255359,10.5642974],[-14.6256888,10.5641815],[-14.6257365,10.5640599],[-14.6256993,10.5638285],[-14.6256292,10.5634344],[-14.6254035,10.5630515],[-14.625193,10.5626714],[-14.6251309,10.5625678],[-14.6251255,10.5624518],[-14.6251507,10.5623259],[-14.6253187,10.5623147],[-14.6254581,10.5623358],[-14.625743,10.5624558],[-14.6260107,10.562726],[-14.6261109,10.5627679],[-14.6261609,10.562726],[-14.6261984,10.5626153],[-14.626295,10.5626046],[-14.6265847,10.5626838],[-14.6267885,10.5627946],[-14.6270245,10.5629792],[-14.6275073,10.563111],[-14.6277809,10.5632112],[-14.627974,10.563169],[-14.6281296,10.5631796],[-14.6282905,10.5632376],[-14.6284086,10.5632323],[-14.6285963,10.5632745],[-14.6289182,10.5633747],[-14.6291703,10.563401],[-14.6297046,10.5634207],[-14.6307099,10.5637755],[-14.6313161,10.5639969],[-14.6315038,10.5641077],[-14.6315736,10.5641604],[-14.6316648,10.564171],[-14.6317452,10.5641235],[-14.6319759,10.5640286],[-14.6321851,10.5639811],[-14.6324372,10.5639548],[-14.6326196,10.5639653],[-14.632861,10.5639337],[-14.6329576,10.5638968],[-14.6329844,10.5637175],[-14.6329522,10.5635065],[-14.6327967,10.5633483],[-14.6326947,10.5632534],[-14.6326894,10.563111],[-14.632743,10.5630055],[-14.632808,10.5629532],[-14.6332634,10.563343],[-14.6335262,10.5635065],[-14.6337944,10.5635065],[-14.6339843,10.5634576],[-14.6340841,10.5633378],[-14.6341592,10.563285],[-14.6342236,10.5632059],[-14.6342987,10.5631585],[-14.6343309,10.5631637],[-14.6343792,10.5631848],[-14.6344435,10.5631901],[-14.6345401,10.563169],[-14.6345776,10.5630952],[-14.6346366,10.5630003],[-14.6346957,10.5629897],[-14.6347761,10.5630003],[-14.6348888,10.5630003],[-14.6349353,10.5629409],[-14.6349907,10.5627524],[-14.6350658,10.5627155],[-14.6352053,10.5626944],[-14.6352982,10.5626088],[-14.6352804,10.5624465],[-14.6351785,10.5622672],[-14.635048,10.5618584],[-14.6349371,10.5616608],[-14.6347225,10.5614129],[-14.6346635,10.5612073],[-14.6347868,10.5609436],[-14.6348727,10.5607115],[-14.6349585,10.560585],[-14.6349585,10.5604848],[-14.6348834,10.5603266],[-14.634819,10.560142],[-14.6348941,10.5601051],[-14.6350229,10.5602158],[-14.6350819,10.5602475],[-14.6352857,10.5603318],[-14.6356611,10.5605667],[-14.6363211,10.5606641],[-14.6366698,10.5607326],[-14.6369219,10.5607326],[-14.6370935,10.5606746],[-14.6377009,10.5601976],[-14.6380055,10.5600365],[-14.6383327,10.5598045],[-14.6385795,10.5596832],[-14.6390023,10.5595826],[-14.6393734,10.5594617],[-14.6396953,10.5593035],[-14.6400225,10.5590978],[-14.6402411,10.5589429],[-14.6405321,10.558734],[-14.6407199,10.5585072],[-14.6409108,10.5581705],[-14.6409452,10.5578638],[-14.6408166,10.5574419],[-14.6406267,10.5567605],[-14.6404089,10.5561024],[-14.6404894,10.5552857],[-14.640565,10.554518],[-14.6405644,10.5543305],[-14.6406288,10.5540615],[-14.6407512,10.5539034],[-14.6410418,10.5539771],[-14.6412563,10.5540299],[-14.6415299,10.5541248],[-14.6416641,10.5542619],[-14.641766,10.5544412],[-14.6418733,10.5545362],[-14.6422005,10.5546364],[-14.6423882,10.5547735],[-14.6428765,10.5551321],[-14.6432895,10.5552956],[-14.6435523,10.5554116],[-14.6441156,10.5556542],[-14.6444428,10.5556383],[-14.6446788,10.5555645],[-14.645284,10.5552438],[-14.6455543,10.5555663],[-14.6461258,10.5562486],[-14.6466231,10.5573805],[-14.6470611,10.5590044],[-14.6475864,10.5600365],[-14.6481999,10.561231],[-14.648509,10.5616924],[-14.648813,10.5620798],[-14.6489328,10.5621565],[-14.649201,10.5621249],[-14.6494532,10.5619561],[-14.6495819,10.5618401],[-14.6496356,10.5618454],[-14.649657,10.5619086],[-14.6496624,10.5620668],[-14.6496302,10.5623727],[-14.6495551,10.5626838],[-14.6494961,10.5629686],[-14.6492815,10.5632534],[-14.6492064,10.5634432],[-14.6492361,10.5636125],[-14.6492976,10.5639653],[-14.6493352,10.5640866],[-14.6494639,10.5641446],[-14.649657,10.5641921],[-14.649995,10.5641446],[-14.6504148,10.5640112],[-14.6509874,10.563496],[-14.6521354,10.5621829],[-14.6525967,10.5617135],[-14.6531803,10.5611572],[-14.653781,10.5608127],[-14.6540558,10.5606799],[-14.6541899,10.5606535],[-14.6543026,10.560701],[-14.6544367,10.5607432],[-14.6547639,10.5606588],[-14.6553755,10.5603266],[-14.6557993,10.5598994],[-14.6559817,10.5595777],[-14.6562177,10.5589924],[-14.6566091,10.5581186],[-14.6570331,10.5567142],[-14.6571833,10.5560919],[-14.6573474,10.5552769],[-14.6575226,10.554059],[-14.6574193,10.5519995],[-14.6573496,10.5513667],[-14.6571082,10.550449],[-14.6567842,10.5492612],[-14.6563572,10.5479967],[-14.6556759,10.546441],[-14.6553201,10.545103],[-14.6549823,10.544328],[-14.6543941,10.5435652],[-14.6537434,10.5429255],[-14.6532941,10.5425858],[-14.6525861,10.5422272],[-14.6518637,10.5422835],[-14.6509735,10.5423527],[-14.6509016,10.5423485],[-14.6507728,10.542417],[-14.6506494,10.5425436],[-14.650569,10.54257],[-14.6503598,10.5425278],[-14.6501827,10.5423485],[-14.6500593,10.5422061],[-14.6499842,10.5420057],[-14.6500379,10.5417736],[-14.6500272,10.5416998],[-14.6499768,10.5416091],[-14.6496785,10.5414678],[-14.64948,10.5413254],[-14.6490884,10.5408191],[-14.6486807,10.5405343],[-14.6483856,10.5402706],[-14.6481711,10.53997],[-14.647978,10.5392052],[-14.6478277,10.5385935],[-14.6475864,10.5380977],[-14.6472055,10.5379553],[-14.6469373,10.5378288],[-14.6466897,10.5376758],[-14.6465778,10.5375229],[-14.6465296,10.5374385],[-14.6465135,10.5372012],[-14.6466422,10.5369533],[-14.6469158,10.5363046],[-14.647007,10.5361147],[-14.6471572,10.5359038],[-14.6472752,10.5356875],[-14.6473718,10.535524],[-14.6473771,10.5353605],[-14.6473664,10.5352709],[-14.6473879,10.5352181],[-14.6475488,10.5351285],[-14.647581,10.5351021],[-14.6477312,10.5350599],[-14.6478707,10.5350441],[-14.6478975,10.5349439],[-14.6478385,10.5349017],[-14.6474254,10.5349808],[-14.6473664,10.5349808],[-14.6471411,10.5349175],[-14.6471196,10.5348226],[-14.6472055,10.5344007],[-14.6471894,10.5340842],[-14.6472055,10.5339893],[-14.6473235,10.5338996],[-14.6474522,10.5338416],[-14.6475542,10.5338574],[-14.6477419,10.5339207],[-14.6481121,10.533694],[-14.6484017,10.5332879],[-14.6485502,10.5329604],[-14.6486539,10.5325653],[-14.6487504,10.5323807],[-14.6489006,10.5321592],[-14.6488953,10.5320274],[-14.6487773,10.5318586],[-14.6482891,10.5315369],[-14.6482703,10.5314736],[-14.648281,10.5313971],[-14.6483588,10.5313206],[-14.6485412,10.5312494],[-14.6486914,10.5311993],[-14.6488202,10.5310886],[-14.6488363,10.5309778],[-14.6487961,10.5306876],[-14.6488228,10.5305401],[-14.6489865,10.5302421],[-14.6490267,10.5300628],[-14.6490535,10.5299546],[-14.6491313,10.5299019],[-14.6492466,10.5299204],[-14.6493904,10.5299613],[-14.6500112,10.5299758],[-14.6502378,10.5300219],[-14.6512461,10.530227],[-14.6513575,10.5303317],[-14.651438,10.5303106],[-14.6515051,10.5302315],[-14.6514192,10.5300812],[-14.6513629,10.5298729],[-14.6513736,10.5295485],[-14.6514139,10.5293982],[-14.6514353,10.5292374],[-14.6514836,10.5291213],[-14.6515453,10.5289974],[-14.6516633,10.5288181],[-14.6517679,10.5286493],[-14.651835,10.5284937],[-14.6519557,10.5281984],[-14.6521488,10.5278213],[-14.6524492,10.527402],[-14.6527791,10.526893],[-14.6532083,10.5263129],[-14.6534927,10.5259516],[-14.6536669,10.5258488],[-14.6538038,10.5257933],[-14.653946,10.5258144],[-14.6540988,10.52592],[-14.6542142,10.5259436],[-14.6543536,10.5259041],[-14.6545896,10.52568],[-14.6548444,10.5255138],[-14.6550939,10.5253556],[-14.6553513,10.525295],[-14.6554855,10.5252686],[-14.6556973,10.5252185],[-14.6558341,10.5252],[-14.6559978,10.5251842],[-14.6561104,10.5251763],[-14.6562687,10.5251948],[-14.656384,10.5252686],[-14.656494,10.525295],[-14.6566469,10.5252976],[-14.6568051,10.5253134],[-14.6569419,10.5253794],[-14.6570277,10.5254611],[-14.6571109,10.5254901],[-14.6572074,10.5255112],[-14.6572906,10.5255218],[-14.6573952,10.5254532],[-14.6574971,10.5253583],[-14.6577358,10.5252106],[-14.6580416,10.5250181],[-14.6582776,10.5248968],[-14.6583769,10.5247807],[-14.6584708,10.5243588],[-14.6586585,10.5235677],[-14.6588409,10.5230772],[-14.6588195,10.522845],[-14.6587229,10.5226394],[-14.6584439,10.5224548],[-14.6580201,10.5223599],[-14.6568078,10.5223493],[-14.6561533,10.522497],[-14.655472,10.5227713],[-14.654882,10.5229242],[-14.6543133,10.5229981],[-14.6537179,10.5228293],[-14.6533531,10.5225814],[-14.6531278,10.5223019],[-14.6529695,10.5218878],[-14.6529428,10.52164],[-14.6529105,10.5213921],[-14.6528248,10.5212628],[-14.6526182,10.5211811],[-14.6524063,10.5212101],[-14.6520604,10.5214343],[-14.6517438,10.5216294],[-14.6512476,10.5217718],[-14.6509177,10.5217613],[-14.6504885,10.5213789],[-14.651092,10.5214606],[-14.65143,10.5214184],[-14.6517116,10.5213314],[-14.6520066,10.5210888],[-14.6523018,10.5209411],[-14.6526289,10.5208462],[-14.6529079,10.5208989],[-14.6531279,10.5210545],[-14.6532619,10.521276],[-14.6532834,10.5215767],[-14.6533156,10.5218325],[-14.6534255,10.522083],[-14.6535865,10.5222544],[-14.6539378,10.5224654],[-14.6541202,10.5225708],[-14.6543562,10.5226078],[-14.6546299,10.5225867],[-14.6549705,10.5224838],[-14.6555284,10.5222781],[-14.6562284,10.5220302],[-14.6567997,10.5218641],[-14.6571028,10.5218193],[-14.6576768,10.5217191],[-14.657913,10.5216347],[-14.6581222,10.5214738],[-14.6583259,10.521342],[-14.6585111,10.5212602],[-14.6587713,10.5212075],[-14.6589804,10.5212338],[-14.6591843,10.5213683],[-14.6594095,10.5216505],[-14.6596161,10.5220091],[-14.6597341,10.5223968],[-14.6597931,10.5227976],[-14.659828,10.5233145],[-14.6598012,10.5235519],[-14.6597208,10.5239079],[-14.6596375,10.5241953],[-14.6594928,10.5245408],[-14.6592835,10.5250022],[-14.6592486,10.5251948],[-14.6592862,10.5253345],[-14.6593855,10.5253977],[-14.6595249,10.5253556],[-14.6596697,10.5253424],[-14.6598414,10.525353],[-14.6599917,10.525382],[-14.6601123,10.5253583],[-14.6603538,10.5251552],[-14.6605897,10.5248493],[-14.6607935,10.524285],[-14.6608955,10.5238525],[-14.660992,10.5231985],[-14.661051,10.5227555],[-14.6610349,10.5224865],[-14.6610403,10.5220118],[-14.660933,10.5216109],[-14.6609384,10.5210308],[-14.6608901,10.5205086],[-14.6608365,10.5201816],[-14.6607667,10.519765],[-14.6607077,10.5195804],[-14.6607614,10.5192323],[-14.6607935,10.5188103],[-14.660874,10.5182302],[-14.6609491,10.5178451],[-14.6609974,10.5174918],[-14.6609974,10.5171753],[-14.6610028,10.5170223],[-14.6609599,10.516864],[-14.6608579,10.516785],[-14.6607238,10.5167217],[-14.6605897,10.5166584],[-14.6605092,10.5165424],[-14.6604985,10.5164211],[-14.6605468,10.5163367],[-14.6606531,10.5162927],[-14.6609142,10.5161679],[-14.6611181,10.5162075],[-14.6612844,10.5163077],[-14.6615633,10.5165476],[-14.661719,10.5167428],[-14.6618128,10.5168193],[-14.6619308,10.5168087],[-14.6620327,10.5166479],[-14.6622339,10.5163446],[-14.6623975,10.5161784],[-14.6627517,10.516044],[-14.663111,10.5158383],[-14.6634865,10.5155877],[-14.6636823,10.5153873],[-14.6638995,10.5152449],[-14.6642081,10.5151921],[-14.6644387,10.5151262],[-14.6645889,10.5150313],[-14.6648839,10.5148124],[-14.6652111,10.5147148],[-14.6655974,10.5146805],[-14.6659541,10.5148203],[-14.6663109,10.5148968],[-14.6665925,10.5150867],[-14.6667829,10.5152686],[-14.6669009,10.5154137],[-14.6670216,10.5154374],[-14.6671477,10.5153583],[-14.667204,10.5152185],[-14.6671665,10.5149311],[-14.667086,10.5143984],[-14.6671155,10.5139632],[-14.6671101,10.5136863],[-14.6671101,10.5132538],[-14.6671987,10.5131378],[-14.6672952,10.5130745],[-14.6673435,10.5129295],[-14.667314,10.5128055],[-14.6671504,10.5126183],[-14.6671236,10.5124495],[-14.6671289,10.5123071],[-14.6672148,10.5121541],[-14.6673435,10.5120592],[-14.6674615,10.511959],[-14.6675527,10.5117744],[-14.6675634,10.5115317],[-14.6674347,10.5112047],[-14.6672899,10.510999],[-14.6671236,10.5108197],[-14.6668848,10.5106747],[-14.666689,10.5105375],[-14.6665281,10.5104716],[-14.6663618,10.510345],[-14.6662653,10.5102448],[-14.6662545,10.5101129],[-14.6662545,10.5098967],[-14.666276,10.5096013],[-14.6662813,10.5093165],[-14.6662438,10.5090369],[-14.6661741,10.508768],[-14.6660346,10.5083882],[-14.6657556,10.5074599],[-14.6655303,10.5066898],[-14.6651775,10.5054914],[-14.6648191,10.5043343],[-14.6641785,10.5023383],[-14.6634328,10.5002391],[-14.6629018,10.4983349],[-14.6622205,10.4959455],[-14.6617967,10.494168],[-14.6611691,10.4919262],[-14.660638,10.4900906],[-14.6599299,10.487775],[-14.6596938,10.4865881],[-14.6595275,10.4854857],[-14.6594095,10.4838505],[-14.6594149,10.4826636],[-14.6593773,10.4822417],[-14.6592486,10.4816931],[-14.6588785,10.4806012],[-14.6586961,10.4797835],[-14.6584868,10.4783013],[-14.6584708,10.4774942],[-14.6584868,10.4769931],[-14.658578,10.4764761],[-14.6587926,10.4758115],[-14.6592486,10.4749517],[-14.6595758,10.4744189],[-14.6599299,10.4739811],[-14.6603215,10.4736804],[-14.6607614,10.4735116],[-14.6611476,10.4734483],[-14.6612978,10.4734799],[-14.6614963,10.4734799],[-14.661625,10.473443],[-14.6617484,10.4733903],[-14.661904,10.4733164],[-14.6620596,10.4732267],[-14.6622527,10.4730316],[-14.6623787,10.4728707],[-14.662537,10.4727467],[-14.6626067,10.4726254],[-14.6625531,10.4724196],[-14.6623546,10.4720504],[-14.662199,10.4716706],[-14.6620649,10.4713066],[-14.6620059,10.4708371],[-14.6618772,10.4701725],[-14.6619308,10.4695342],[-14.6618557,10.4692177],[-14.6616572,10.468611],[-14.6615821,10.4675507],[-14.6616519,10.4666223],[-14.6617216,10.4662689],[-14.6618182,10.4658891],[-14.6618289,10.4654934],[-14.6618557,10.4652349],[-14.661727,10.4649237],[-14.6614105,10.4645914],[-14.6610457,10.4643434],[-14.6607453,10.4641746],[-14.6603644,10.4639847],[-14.6597582,10.4635469],[-14.6590447,10.4628716],[-14.6582562,10.4620223],[-14.6572691,10.4606824],[-14.6563786,10.4591104],[-14.6558797,10.4578865],[-14.6555418,10.4567365],[-14.6554345,10.4562195],[-14.6554184,10.455655],[-14.6554881,10.455233],[-14.6555686,10.4550853],[-14.6557564,10.4549112],[-14.6559066,10.4547319],[-14.6560031,10.4546],[-14.656046,10.4544417],[-14.6560299,10.4543151],[-14.655928,10.4543098],[-14.655869,10.4544417],[-14.6557403,10.4545525],[-14.6555901,10.4547319],[-14.6554238,10.4550484],[-14.6553272,10.4551486],[-14.6551448,10.4552172],[-14.65478,10.4552858],[-14.6543616,10.4553755],[-14.6536321,10.4555865],[-14.6525806,10.4559927],[-14.6508372,10.4566943],[-14.6497536,10.4570952],[-14.6487021,10.4574909],[-14.6472752,10.4582241],[-14.646755,10.4585565],[-14.6466798,10.4588202],[-14.6467066,10.4591684],[-14.6475971,10.4609251],[-14.647935,10.4619643],[-14.6482569,10.4633939],[-14.648214,10.4649184],[-14.6480316,10.4659682],[-14.6476668,10.4670918],[-14.6474737,10.4676932],[-14.6473781,10.4680415],[-14.6472591,10.4686005],[-14.6467924,10.4699298],[-14.6467925,10.4719765],[-14.6467549,10.4729682],[-14.6467602,10.473712],[-14.6465027,10.4741551],[-14.646197,10.474556],[-14.6461701,10.4752682],[-14.646492,10.4766238],[-14.6464438,10.476782],[-14.6463311,10.4769192],[-14.6460897,10.4770669],[-14.6446681,10.4768243],[-14.6440405,10.4766502],[-14.641884,10.475648],[-14.6416426,10.4756902],[-14.6415836,10.4758642],[-14.6414924,10.4760436],[-14.6414281,10.4761807],[-14.6412779,10.4763232],[-14.641058,10.4763021],[-14.6409614,10.4761966],[-14.6408487,10.4761122],[-14.6406878,10.4761385],[-14.6403767,10.4763179],[-14.6399474,10.4764656],[-14.6392661,10.4764709],[-14.6387566,10.476418],[-14.6383274,10.4762862],[-14.6373726,10.4761332],[-14.6365464,10.4760805],[-14.6361012,10.4760751],[-14.6354789,10.4759697],[-14.6350605,10.4758167],[-14.6347548,10.4757956],[-14.6344865,10.4756373],[-14.6343684,10.4754844],[-14.6338695,10.4752207],[-14.6327699,10.4747511],[-14.631654,10.4744294],[-14.6306241,10.4741235],[-14.6292401,10.4738544],[-14.6281886,10.473749],[-14.6266598,10.4738914],[-14.6254314,10.4739282],[-14.6240634,10.474171],[-14.6230012,10.4742923],[-14.6225132,10.4745137],[-14.6219714,10.4748672],[-14.6210378,10.4756954],[-14.6202546,10.47655],[-14.6192569,10.4781272],[-14.6184683,10.4789501],[-14.6174759,10.4800737],[-14.6170789,10.4808649],[-14.6167624,10.4818144],[-14.6164566,10.4827217],[-14.6159041,10.4839507],[-14.61577,10.4844729],[-14.6158452,10.4854803],[-14.6159358,10.4862849],[-14.6121442,10.4856462],[-14.6089411,10.4852483],[-14.6088902,10.4848051],[-14.6089036,10.4843594],[-14.6089278,10.484159],[-14.6089224,10.4839691],[-14.6089439,10.483853],[-14.6090485,10.4837581],[-14.6091127,10.4836527],[-14.60944,10.48269],[-14.6100032,10.4813528],[-14.6107864,10.4801607],[-14.6116823,10.4790398],[-14.612487,10.4784332],[-14.6131682,10.4780058],[-14.6136886,10.4777473],[-14.6141499,10.4766501],[-14.6145389,10.4764313],[-14.6156949,10.4754317],[-14.6176261,10.4734615],[-14.6191759,10.4720935],[-14.6196164,10.4716283],[-14.6204048,10.4710481],[-14.620936,10.4705891],[-14.6214886,10.4700986],[-14.6214269,10.4698532],[-14.6214778,10.4697477],[-14.6215932,10.4697161],[-14.6217004,10.4697055],[-14.6218483,10.4697816],[-14.6227224,10.4693336],[-14.6240795,10.4687904],[-14.6252329,10.4684448],[-14.6262011,10.4682101],[-14.6273759,10.4680861],[-14.6286608,10.4680967],[-14.6293151,10.4681231],[-14.6313831,10.4685002],[-14.6323703,10.4687824],[-14.632617,10.4688483],[-14.6329148,10.4688931],[-14.6330729,10.4689908],[-14.6332527,10.469178],[-14.633698,10.4694207],[-14.634532,10.4696212],[-14.6362165,10.469856],[-14.6370936,10.4698875],[-14.637689,10.4697557],[-14.6381128,10.4695078],[-14.6384347,10.4691807],[-14.6387297,10.4686058],[-14.6388209,10.4673239],[-14.6385849,10.4660895],[-14.6384562,10.4656199],[-14.6382202,10.4653034],[-14.6377964,10.4650396],[-14.6373564,10.4646547],[-14.6371365,10.4640216],[-14.6369648,10.4635838],[-14.6369809,10.4629455],[-14.6370293,10.4627397],[-14.6370131,10.4625182],[-14.6368523,10.462344],[-14.6366376,10.4621278],[-14.6362514,10.4614472],[-14.6358168,10.4610464],[-14.6352536,10.4605769],[-14.634068,10.4598067],[-14.6332849,10.4593424],[-14.6324748,10.4589838],[-14.6316487,10.4586673],[-14.629975,10.4581556],[-14.6286982,10.457992],[-14.6284408,10.4580236],[-14.6280438,10.4582347],[-14.6277756,10.4585248],[-14.6275127,10.4586514],[-14.627105,10.4587728],[-14.6266705,10.4587833],[-14.6264237,10.4588783],[-14.6261501,10.4590998],[-14.6259356,10.4592264],[-14.6255225,10.4594585],[-14.6253026,10.4596168],[-14.6248251,10.4598436],[-14.624514,10.4598964],[-14.6241117,10.4599966],[-14.6237254,10.4600494],[-14.6232909,10.4601391],[-14.6230173,10.4602709],[-14.6227008,10.4605769],[-14.6223199,10.4612363],[-14.622041,10.4615212],[-14.621644,10.4617533],[-14.6213329,10.4619432],[-14.6209896,10.4619907],[-14.6206892,10.461959],[-14.6204639,10.4619115],[-14.6203083,10.4619379],[-14.6200079,10.4620065],[-14.6196538,10.462112],[-14.6194178,10.4621859],[-14.6191227,10.4623652],[-14.6188599,10.4627187],[-14.6186292,10.4629903],[-14.6184201,10.4630931],[-14.6180284,10.463167],[-14.6174491,10.4632726],[-14.6169394,10.4633992],[-14.6167946,10.4634598],[-14.6166819,10.4636445],[-14.6165988,10.4638185],[-14.6164379,10.4640375],[-14.6162367,10.4642247],[-14.615896,10.4642933],[-14.6154588,10.4642854],[-14.6150136,10.4642168],[-14.6143377,10.4642221],[-14.6137691,10.4642326],[-14.613356,10.4642221],[-14.6127874,10.464317],[-14.6124065,10.4646072],[-14.6121919,10.464834],[-14.6117896,10.4649712],[-14.6114194,10.4649501],[-14.6110761,10.464718],[-14.6108991,10.4644173],[-14.6106952,10.4643487],[-14.610529,10.4643592],[-14.6103841,10.4645122],[-14.6101535,10.4646124],[-14.609601,10.4646335],[-14.6090645,10.4647918],[-14.6087587,10.4648129],[-14.6085442,10.4648814],[-14.6083617,10.4648657],[-14.608174,10.4647865],[-14.6080479,10.4647364],[-14.6078923,10.4647654],[-14.6077582,10.4648868],[-14.6076375,10.4649158],[-14.6075088,10.4648446],[-14.6072406,10.4646388],[-14.6070206,10.4645703],[-14.6067336,10.4646125],[-14.60657,10.4645729],[-14.6063957,10.4644357],[-14.6061033,10.4643434],[-14.6056366,10.4639742],[-14.6051216,10.4636787],[-14.6046281,10.4633939],[-14.60392,10.4630141],[-14.6033245,10.4626237],[-14.6025842,10.4621859],[-14.6020854,10.4620909],[-14.6014845,10.462112],[-14.6008623,10.4619959],[-14.6002883,10.4617744],[-14.5998323,10.4615634],[-14.5994353,10.4612996],[-14.5989096,10.4608934],[-14.5985448,10.460598],[-14.5981425,10.460387],[-14.5976061,10.4602446],[-14.5972145,10.4601971],[-14.5969194,10.4600758],[-14.5965654,10.4597751],[-14.5963025,10.459543],[-14.5960343,10.4594374],[-14.5957178,10.459353],[-14.5954442,10.4592739],[-14.5950955,10.4591104],[-14.5945752,10.4587517],[-14.5938563,10.4581661],[-14.5935667,10.4579182],[-14.5932823,10.4577203],[-14.5931456,10.4576464],[-14.5929578,10.4574855],[-14.5926923,10.4571532],[-14.5922792,10.4566837],[-14.5920646,10.4564411],[-14.5918232,10.4562459],[-14.591657,10.4561983],[-14.5914344,10.456193],[-14.5912601,10.4561983],[-14.5911528,10.4561561],[-14.5910347,10.4560138],[-14.5909502,10.4558885],[-14.5908939,10.4558541],[-14.5907893,10.4558396],[-14.5904824,10.4559486],[-14.5903588,10.4559939],[-14.590269,10.4560137],[-14.5901818,10.4559899],[-14.5900691,10.4558898],[-14.589892,10.4556814],[-14.5898089,10.4554968],[-14.5897527,10.4554466],[-14.5896722,10.4554307],[-14.5894629,10.4554994],[-14.5893101,10.4555574],[-14.5892243,10.4555626],[-14.5891049,10.4555099],[-14.5889586,10.4553926],[-14.5888622,10.4553622],[-14.5887763,10.4553569],[-14.5885684,10.4553979],[-14.5883834,10.4553912],[-14.5882265,10.4553213],[-14.588103,10.4551644],[-14.5879422,10.45489],[-14.5877811,10.4547609],[-14.5874969,10.4546737],[-14.5870382,10.4546264],[-14.5867888,10.4546315],[-14.5865689,10.4545577],[-14.5863999,10.454373],[-14.5862281,10.454207],[-14.5860056,10.4540723],[-14.585732,10.4540222],[-14.5855281,10.4539854],[-14.5853646,10.4538824],[-14.5851499,10.4536873],[-14.5848818,10.4535158],[-14.5843292,10.4532924],[-14.5839268,10.4531466],[-14.583664,10.4529724],[-14.583444,10.4528565],[-14.5826045,10.4525505],[-14.5819983,10.4523579],[-14.5812041,10.4522172],[-14.5805097,10.4520731],[-14.5800055,10.451937],[-14.5789304,10.4514442],[-14.5770383,10.4501233],[-14.5609532,10.434926],[-14.5374648,10.4147561],[-14.5215138,10.3935504],[-14.4764653,10.3464789],[-14.4661234,10.3376846],[-14.4594405,10.3207159],[-14.4553503,10.3044974],[-14.4547925,10.2977293],[-14.4574574,10.2929122],[-14.4645223,10.2648012],[-14.4648321,10.2627278],[-14.4681167,10.2593738],[-14.4693562,10.2569345],[-14.4686745,10.2540074],[-14.4671871,10.2518729],[-14.4625391,10.2458355],[-14.4617955,10.2419325],[-14.4625391,10.2391881],[-14.4635927,10.2357119],[-14.4620434,10.2335164],[-14.4609278,10.2327845],[-14.4622912,10.2315648],[-14.4631589,10.2282104],[-14.4600602,10.2246731],[-14.4575193,10.2202819],[-14.455908,10.2169884],[-14.4564038,10.2135729],[-14.455908,10.2097305],[-14.4538629,10.2054001],[-14.4504544,10.205644],[-14.4446909,10.2079007],[-14.4404768,10.2093645],[-14.4366344,10.2141219],[-14.4334118,10.2180862],[-14.4295695,10.2231484],[-14.4257272,10.2246731],[-14.4224426,10.2260758],[-14.4178566,10.2255879],[-14.414696,10.2243682],[-14.4098621,10.2211967],[-14.4066395,10.2225995],[-14.4038507,10.2272346],[-14.3998225,10.2322966],[-14.3954844,10.2343702],[-14.3915801,10.2347361],[-14.3891011,10.235285],[-14.3882335,10.2355289],[-14.3829658,10.2347361],[-14.3742896,10.2322966],[-14.3679541,10.2299576],[-14.3610303,10.2266801],[-14.3555088,10.223532],[-14.3500311,10.2212032],[-14.3501625,10.2192194],[-14.3479715,10.2193487],[-14.3425376,10.2175805],[-14.3187425,10.2010626],[-14.3200571,10.1939894],[-14.310022,10.18394],[-14.3071298,10.1853202],[-14.3064725,10.1873474],[-14.2964373,10.1789368],[-14.2888222,10.1732818],[-14.2788445,10.1662669],[-14.2710359,10.1623629],[-14.2634133,10.1597399],[-14.254923,10.1587638],[-14.2428045,10.1546958],[-14.246337,10.1501206],[-14.2487539,10.1453624],[-14.2491877,10.1392009],[-14.2476384,10.1347475],[-14.2361114,10.1210209],[-14.2263197,10.1121745],[-14.2189449,10.1086969],[-14.2124997,10.1065615],[-14.2074179,10.1047311],[-14.2017784,10.1013755],[-14.1984318,10.1011314],[-14.1887641,10.0955793],[-14.1874006,10.0927726],[-14.184302,10.0872203],[-14.1788484,10.0816679],[-14.1740765,10.0766035],[-14.1688087,10.0716611],[-14.1624255,10.0670237],[-14.1575297,10.061593],[-14.1464985,10.0555519],[-14.1403012,10.0514635],[-14.1451351,10.042005],[-14.1352814,10.0382825],[-14.1305714,10.0468258],[-14.1258615,10.0453003],[-14.1202839,10.0455443],[-14.1147683,10.0474971],[-14.1108491,10.0513841],[-14.0979588,10.056754],[-14.0829613,10.0601711],[-14.0779684,10.0615011],[-14.0715572,10.0561942],[-14.065237,10.0504077],[-14.0641215,10.0375929],[-14.0605271,10.0269744],[-14.0509832,10.0197733],[-14.0440386,10.0146295],[-14.0373777,10.0077248],[-14.0317844,10.0034545],[-14.0287477,10.0003419],[-14.0300491,9.994666],[-14.0274463,9.9935063],[-14.0258969,9.9959476],[-14.0242237,10.000525],[-14.021125,10.0026611],[-14.0162292,9.998572],[-14.0116432,9.994788],[-14.005074,9.9904547],[-13.9989387,9.9866096],[-13.9898287,9.9805671],[-13.9801609,9.9762336],[-13.9733438,9.9737922],[-13.9672085,9.9730597],[-13.9633662,9.9739753],[-13.9607014,9.9754402],[-13.9553097,9.9750739],[-13.9496082,9.9753791],[-13.9502279,9.9692754],[-13.9509096,9.9666508],[-13.9503519,9.9631717],[-13.9482448,9.9603028],[-13.9360118,9.9504775],[-13.9195349,9.9399458],[-13.8989388,9.9256151],[-13.8710683,9.9041179],[-13.8594994,9.8932393],[-13.8503105,9.8843605],[-13.8426879,9.8725771],[-13.8371723,9.8621975],[-13.8327102,9.8555422],[-13.8277524,9.850108],[-13.8208734,9.8462612],[-13.8100281,9.8403994],[-13.8018477,9.8375295],[-13.795518,9.8366082],[-13.7913112,9.837774],[-13.7870167,9.8395442],[-13.7821087,9.8293111],[-13.7832042,9.8256841],[-13.7825469,9.8214526],[-13.7811446,9.8146302],[-13.7772445,9.8105281],[-13.7734758,9.8091895],[-13.7688126,9.8088693],[-13.7636416,9.8116329],[-13.7602573,9.8092934],[-13.7502444,9.8304854],[-13.7261087,9.8484827],[-13.7171578,9.8568583],[-13.7086648,9.8686698],[-13.6957881,9.9026287],[-13.6852826,9.9397563],[-13.6869243,9.9450247],[-13.6925386,9.9537145],[-13.6924847,9.9599738],[-13.6910755,9.9626964],[-13.6886889,9.9646196],[-13.6775886,9.9666695],[-13.6745893,9.9694162],[-13.6734822,9.9732066],[-13.6748663,9.9844153],[-13.6796592,9.9859287],[-13.7599958,9.9983099],[-13.8348335,10.0439985],[-13.9216452,10.0977849],[-13.9291301,10.1419879],[-13.8266062,10.2046017],[-13.8056529,10.2384807],[-13.7749714,10.2892924],[-13.5676407,10.2904889],[-13.5656964,10.2951643],[-13.5640655,10.2978387],[-13.5626398,10.2994837],[-13.5611628,10.3014819],[-13.5601986,10.3036213],[-13.5592857,10.3059223],[-13.5587933,10.3072443],[-13.5583933,10.3092424],[-13.5582087,10.3108974],[-13.5581779,10.3124212],[-13.5580959,10.3146111],[-13.557942,10.3163064],[-13.5576856,10.3172247],[-13.5573832,10.3179116],[-13.5571884,10.3187038],[-13.5571627,10.3193597],[-13.5571627,10.3198441],[-13.5571782,10.3202023],[-13.5573833,10.3208986],[-13.5582808,10.3225334],[-13.5597736,10.3252449],[-13.5598806,10.325439],[-13.5616243,10.3286479],[-13.5617577,10.3301212],[-13.5617577,10.3319577],[-13.5616961,10.3331585],[-13.5608345,10.3360546],[-13.5597678,10.3378709],[-13.5579625,10.340111],[-13.5558803,10.3426942],[-13.5524852,10.3454287],[-13.5490388,10.3484256],[-13.5459719,10.3519269],[-13.5451616,10.3528148],[-13.544023,10.3536725],[-13.5426734,10.3547273],[-13.5421562,10.3549943],[-13.5409151,10.355519],[-13.5394278,10.355963],[-13.53764,10.3556255],[-13.536204,10.3556355],[-13.5354294,10.355575],[-13.5350858,10.355691],[-13.5345351,10.3557107],[-13.533937,10.3555094],[-13.5335607,10.3554685],[-13.5333267,10.3555447],[-13.5331402,10.3556199],[-13.5329728,10.3557617],[-13.5325145,10.3562051],[-13.5322702,10.3563671],[-13.5316907,10.3566193],[-13.5312138,10.3567808],[-13.5302066,10.3573352],[-13.5296056,10.3583271],[-13.528627,10.3599788],[-13.527374,10.3613667],[-13.5257063,10.3622169],[-13.5237262,10.3627592],[-13.5226238,10.363437],[-13.5213183,10.3644715],[-13.5204117,10.3655131],[-13.5176846,10.3680815],[-13.516263,10.3702433],[-13.5152041,10.3717415],[-13.5145658,10.3731684],[-13.5133473,10.3751517],[-13.5133183,10.3756226],[-13.5134199,10.3768854],[-13.513224,10.3777914],[-13.5128976,10.3780911],[-13.512564,10.378034],[-13.511962,10.3777629],[-13.511331,10.3780269],[-13.5106057,10.3811517],[-13.5095976,10.3829281],[-13.5087635,10.3841123],[-13.5081615,10.385211],[-13.508089,10.3859529],[-13.5080092,10.3865379],[-13.5077553,10.3869374],[-13.5073419,10.3875438],[-13.506943,10.3877578],[-13.5063918,10.3878435],[-13.5054562,10.3877864],[-13.5044553,10.3876508],[-13.5038943,10.3885087],[-13.5032807,10.3894534],[-13.5028544,10.3905243],[-13.5026348,10.3911536],[-13.5028379,10.392452],[-13.5036915,10.3953013],[-13.5039694,10.396066],[-13.5042304,10.3986656],[-13.5045858,10.401355],[-13.5048179,10.4022111],[-13.5051805,10.4031527],[-13.505594,10.4038376],[-13.505739,10.4043084],[-13.5055795,10.4048933],[-13.5051805,10.4059776],[-13.5051298,10.4064485],[-13.5051588,10.406798],[-13.5058913,10.4091949],[-13.5065006,10.410857],[-13.5069463,10.41219],[-13.5075595,10.4130755],[-13.5088215,10.4139458],[-13.5099892,10.4159931],[-13.5108088,10.4181117],[-13.5112379,10.4197875],[-13.5115849,10.4208081],[-13.5122666,10.422192],[-13.5132966,10.4232762],[-13.5138128,10.4236706],[-13.5150144,10.4267095],[-13.5154724,10.4271781],[-13.516865,10.4279627],[-13.517246,10.4283977],[-13.5176628,10.4290255],[-13.5185394,10.4308732],[-13.5186739,10.4318817],[-13.5187362,10.4326135],[-13.5199837,10.4346678],[-13.5200273,10.4352955],[-13.519962,10.4361799],[-13.5191343,10.4380206],[-13.5189466,10.4384339],[-13.5181995,10.4388833],[-13.5177643,10.4389332],[-13.5172929,10.4394468],[-13.5170826,10.4401387],[-13.5170173,10.4413655],[-13.5172929,10.4425496],[-13.5176845,10.4434198],[-13.5175488,10.4458331],[-13.514721,10.4510678],[-13.512541,10.4537064],[-13.5102454,10.4562863],[-13.5085459,10.4574487],[-13.5076497,10.4580124],[-13.5070845,10.4579092],[-13.506471,10.4574487],[-13.5053083,10.4579966],[-13.5030606,10.4581861],[-13.5015427,10.4586705],[-13.4996484,10.4599259],[-13.4985423,10.460577],[-13.497533,10.4606643],[-13.4962942,10.4609375],[-13.4942823,10.4625699],[-13.4924955,10.4655567],[-13.4919427,10.4677456],[-13.4917717,10.4694712],[-13.4917409,10.4716201],[-13.4917974,10.4740099],[-13.4919466,10.4751448],[-13.4922661,10.4770298],[-13.4921526,10.4777176],[-13.4918862,10.4784083],[-13.4907881,10.4795992],[-13.4896039,10.4806472],[-13.4887696,10.4814015],[-13.4877659,10.482126],[-13.4859276,10.4834736],[-13.4851688,10.4838817],[-13.4843612,10.4841326],[-13.483352,10.4843548],[-13.4820278,10.484466],[-13.4815076,10.4843343],[-13.4804938,10.4838626],[-13.4793215,10.4829524],[-13.4774795,10.4816351],[-13.4757699,10.4801222],[-13.4734134,10.4783396],[-13.472775,10.4780272],[-13.4719999,10.4777811],[-13.4713778,10.4777391],[-13.470482,10.4778685],[-13.4696504,10.4780431],[-13.4692263,10.4783161],[-13.467525,10.4791526],[-13.4668084,10.4794246],[-13.4655084,10.4797263],[-13.464596,10.4797926],[-13.4625436,10.4797926],[-13.4619801,10.4799009],[-13.4616329,10.4801629],[-13.4610516,10.4807266],[-13.4605791,10.4814144],[-13.4596886,10.4843916],[-13.4596144,10.4852282],[-13.4597219,10.4875919],[-13.4598082,10.4889992],[-13.4597194,10.4897138],[-13.4596548,10.4901345],[-13.45913,10.4914365],[-13.4578951,10.4937262],[-13.4574022,10.4943581],[-13.4565625,10.4951123],[-13.4556985,10.4955807],[-13.4536316,10.4963031],[-13.451605,10.4970891],[-13.4511448,10.4973749],[-13.4503132,10.4983196],[-13.4488033,10.5009156],[-13.4483512,10.5016221],[-13.4478133,10.502028],[-13.4471724,10.5024795],[-13.4465721,10.5027401],[-13.4442819,10.5035036],[-13.4408989,10.5039005],[-13.4374836,10.503972],[-13.4344639,10.5036306],[-13.4326426,10.5031158],[-13.430104,10.5020111],[-13.4290624,10.5021064],[-13.4271085,10.502805],[-13.4245168,10.5029082],[-13.4235237,10.5032813],[-13.4230957,10.5035592],[-13.4227728,10.5039879],[-13.4222076,10.5045912],[-13.4217393,10.5049723],[-13.421271,10.5049008],[-13.420835,10.5047341],[-13.4202295,10.5041466],[-13.4198904,10.5035592],[-13.4195351,10.5020985],[-13.4193655,10.5015427],[-13.4192283,10.5009632],[-13.4189215,10.5005583],[-13.4186793,10.5003837],[-13.4181706,10.5004948],[-13.4173327,10.501101],[-13.4170645,10.5012966],[-13.4161279,10.501503],[-13.415386,10.501622],[-13.4137075,10.5015434],[-13.4099737,10.5013301],[-13.4082152,10.5015098],[-13.4071419,10.5018466],[-13.4057032,10.5024641],[-13.4044285,10.503275],[-13.4036479,10.5050912],[-13.4024946,10.5078642],[-13.4016383,10.5095033],[-13.4004637,10.5104092],[-13.3987763,10.5114651],[-13.3967416,10.5124018],[-13.3949266,10.5129432],[-13.3926239,10.5137196],[-13.3914855,10.514569],[-13.3902986,10.5156566],[-13.3875938,10.5188557],[-13.3867137,10.5197607],[-13.3859628,10.5200782],[-13.3852846,10.5199274],[-13.3837586,10.5191415],[-13.3814301,10.5189263],[-13.3796961,10.5328419],[-13.3867459,10.5926308],[-13.3261284,10.6470612],[-13.3800106,10.6978051],[-13.4106936,10.6794206],[-13.4398798,10.7132472],[-13.4047067,10.7617744],[-13.4271576,10.797062],[-13.5012456,10.7977972],[-13.6539119,10.6794206],[-13.7062974,10.7397176],[-13.8884819,10.7593651],[-13.9584429,10.7033221],[-14.0123616,10.7682381],[-13.9340117,10.8797377],[-13.7895994,10.9711115],[-13.8206804,11.054204],[-13.8151654,11.0584996],[-13.8066937,11.0650977],[-13.7843148,11.082527],[-13.783034,11.0835245],[-13.7803943,11.0855803],[-13.7795998,11.0861991],[-13.7783257,11.0871913],[-13.7607521,11.1008773],[-13.7608039,11.1042052],[-13.7594724,11.1096654],[-13.7589136,11.1115499],[-13.7583,11.1124795],[-13.7554075,11.1138884],[-13.7549725,11.1143519],[-13.7541048,11.1164728],[-13.7529826,11.1183258],[-13.7528795,11.1194593],[-13.7532714,11.1214269],[-13.7530915,11.1227214],[-13.7528109,11.1237691],[-13.7516346,11.1259135],[-13.7507136,11.1287644],[-13.7507199,11.1297953],[-13.7508476,11.1308188],[-13.7510029,11.1316169],[-13.75149,11.1330126],[-13.7523651,11.1344133],[-13.7524763,11.1357281],[-13.7520935,11.1371408],[-13.7516204,11.138667],[-13.7511055,11.1394074],[-13.7504663,11.139721],[-13.7496534,11.1403495],[-13.7491131,11.141029],[-13.7489348,11.1414632],[-13.7489969,11.1422166],[-13.7493026,11.1429456],[-13.7499893,11.144293],[-13.7513593,11.1455783],[-13.7528984,11.1458096],[-13.7536545,11.1463882],[-13.7537845,11.1470489],[-13.7531967,11.1477608],[-13.7530185,11.1487422],[-13.7530882,11.1502999],[-13.7527358,11.1520404],[-13.7521947,11.1545047],[-13.7522098,11.1559878],[-13.7525717,11.1567604],[-13.7532338,11.1573794],[-13.7535686,11.158242],[-13.753551,11.1599754],[-13.7536535,11.162282],[-13.7533142,11.1638617],[-13.7525444,11.1653361],[-13.7524989,11.1663679],[-13.7534715,11.167438],[-13.7539884,11.1686592],[-13.754688,11.1727105],[-13.7551672,11.1739811],[-13.7559825,11.1752232],[-13.7570286,11.1757495],[-13.7578226,11.1751442],[-13.7590873,11.1739342],[-13.7617281,11.1724096],[-13.762741,11.1724799],[-13.7634924,11.1734423],[-13.764253,11.1755199],[-13.7654089,11.1798986],[-13.7660925,11.1809614],[-13.7669592,11.1816435],[-13.7680329,11.1826155],[-13.7691702,11.1826673],[-13.7706327,11.1822262],[-13.7747071,11.1820701],[-13.778865,11.1832021],[-13.7856243,11.1836961],[-13.7897397,11.1846999],[-13.790199,11.1851514],[-13.7901002,11.1859801],[-13.788213,11.1868957],[-13.787233,11.1880633],[-13.7871658,11.1891953],[-13.787616,11.1902838],[-13.788937,11.1911736],[-13.7890814,11.1931799],[-13.788479,11.1957861],[-13.7873808,11.1967151],[-13.7823195,11.198514],[-13.7782995,11.2028534],[-13.7779974,11.2056377],[-13.7797578,11.2076128],[-13.7799988,11.2092529],[-13.779457,11.2099526],[-13.7780926,11.2103768],[-13.7742926,11.212896],[-13.773898,11.2135193],[-13.7742861,11.2155913],[-13.7755457,11.2169842],[-13.7763515,11.2208176],[-13.7776122,11.2238003],[-13.7784092,11.2250095],[-13.7806753,11.2268749],[-13.7817488,11.2284887],[-13.7827776,11.2293076],[-13.7835601,11.2290671],[-13.7847132,11.2281721],[-13.7858664,11.2283552],[-13.7866449,11.2282831],[-13.7873539,11.2287808],[-13.7881222,11.2304069],[-13.7878854,11.2334392],[-13.7882695,11.2351977],[-13.7888424,11.2361869],[-13.7903953,11.2374672],[-13.7913293,11.2378591],[-13.7918261,11.2374511],[-13.7923892,11.2365593],[-13.7933569,11.2360554],[-13.7948996,11.2359273],[-13.7953024,11.2368156],[-13.7957141,11.238621],[-13.7952259,11.2415457],[-13.7957436,11.2422192],[-13.7976229,11.2427093],[-13.8006153,11.2443388],[-13.8022743,11.2461481],[-13.8030301,11.2477502],[-13.803936,11.2487138],[-13.805599,11.249303],[-13.8070114,11.2495644],[-13.8090317,11.2495255],[-13.8103604,11.2499049],[-13.8111328,11.2506105],[-13.8107639,11.2518813],[-13.811416,11.2538023],[-13.812377,11.2547383],[-13.8144652,11.2550221],[-13.8161986,11.2548198],[-13.8196497,11.2539618],[-13.824085,11.2539895],[-13.8277139,11.2547635],[-13.8298854,11.2547],[-13.8313,11.2551613],[-13.834338,11.2545477],[-13.8373626,11.2546669],[-13.8382857,11.2558919],[-13.8387513,11.2579821],[-13.839474,11.2598868],[-13.8395312,11.2611258],[-13.8391788,11.2647842],[-13.8395965,11.2667117],[-13.8324608,11.2708241],[-13.8166407,11.2866575],[-13.8175321,11.3053324],[-13.795139,11.3152659],[-13.7620826,11.3189255],[-13.7364905,11.3272902],[-13.6858396,11.3330407],[-13.6394539,11.3257218],[-13.6186604,11.3424504],[-13.5839565,11.3594379],[-13.5573461,11.3691097],[-13.5507613,11.3735221],[-13.525356,11.3800863],[-13.5061619,11.368587],[-13.4859015,11.3769502],[-13.4464794,11.3626523],[-13.4285801,11.3513708],[-13.4253671,11.3493458],[-13.4121718,11.3467584],[-13.395772,11.3495306],[-13.3776757,11.3465735],[-13.3526048,11.3469432],[-13.3333774,11.351194],[-13.3165885,11.3400251],[-13.3053294,11.332763],[-13.2893547,11.3449673],[-13.2879107,11.3430409],[-13.2872647,11.3424199],[-13.28634,11.3417865],[-13.2858079,11.3414263],[-13.2843132,11.3411655],[-13.2838191,11.3408798],[-13.2837261,11.3406561],[-13.283777,11.3402617],[-13.2839078,11.3396502],[-13.2841485,11.3386442],[-13.2838191,11.3380231],[-13.2828944,11.3372903],[-13.2822284,11.3374091],[-13.2808676,11.3384206],[-13.2802342,11.3385821],[-13.2796388,11.3386193],[-13.2790815,11.338433],[-13.2784228,11.3377747],[-13.2773967,11.33657],[-13.2762946,11.3350174],[-13.2758893,11.3346696],[-13.2741538,11.3335766],[-13.2735458,11.3330674],[-13.2730391,11.3324836],[-13.2728111,11.331962],[-13.272431,11.3307572],[-13.2718737,11.3297263],[-13.2704802,11.3285836],[-13.2700495,11.3280619],[-13.2696948,11.3271055],[-13.2691375,11.323727],[-13.2690361,11.322162],[-13.2694162,11.3210068],[-13.2699834,11.3200704],[-13.2701762,11.3197523],[-13.2702776,11.3186965],[-13.2698849,11.316647],[-13.2695175,11.3153676],[-13.2689095,11.3140137],[-13.2684028,11.3125852],[-13.2685421,11.3112934],[-13.2688335,11.3092563],[-13.2695302,11.3079272],[-13.2701382,11.3065235],[-13.2712656,11.3048466],[-13.2714303,11.304387],[-13.2712656,11.303356],[-13.2708223,11.3007722],[-13.270964,11.2997172],[-13.2711089,11.2986073],[-13.2710767,11.297734],[-13.270981,11.2969378],[-13.2708299,11.296077],[-13.2709479,11.2957771],[-13.2711142,11.2955246],[-13.2714844,11.2952458],[-13.2718975,11.2951037],[-13.2728362,11.2951196],[-13.2737643,11.2949723],[-13.2745823,11.2947277],[-13.2747674,11.2946435],[-13.2752288,11.2944843],[-13.2756573,11.294429],[-13.2760335,11.2946224],[-13.2767308,11.2950775],[-13.277455,11.2953142],[-13.2782811,11.2954194],[-13.2787639,11.2952563],[-13.2792522,11.2949985],[-13.2796651,11.294441],[-13.2801533,11.2937466],[-13.2810707,11.292263],[-13.2812584,11.2915686],[-13.2813442,11.2909269],[-13.2812263,11.2895906],[-13.2811832,11.2861712],[-13.2811457,11.2843931],[-13.2809903,11.2827991],[-13.2801319,11.2797426],[-13.2801908,11.2791849],[-13.2804215,11.2786851],[-13.2811993,11.277712],[-13.2812637,11.2774278],[-13.2812423,11.2770701],[-13.2810867,11.2759074],[-13.2807757,11.2739136],[-13.2807756,11.2725773],[-13.2807434,11.2720565],[-13.2806039,11.2716093],[-13.2800353,11.2707097],[-13.2795875,11.2697679],[-13.2787049,11.267411],[-13.2779433,11.2651803],[-13.2773101,11.2638125],[-13.2769454,11.2630918],[-13.2765538,11.2625393],[-13.276028,11.2619922],[-13.2756901,11.2614345],[-13.2748534,11.2601928],[-13.2739574,11.2596824],[-13.2729972,11.2594143],[-13.2706964,11.258985],[-13.2698895,11.2585463],[-13.2694995,11.2581936],[-13.2691451,11.2577998],[-13.2685715,11.2564837],[-13.2679953,11.2552349],[-13.2676005,11.2548685],[-13.267211,11.2545564],[-13.2650194,11.2534664],[-13.2643543,11.2529429],[-13.2638908,11.2521598],[-13.2638968,11.2508509],[-13.2642424,11.2489744],[-13.264503,11.2475594],[-13.2641479,11.2450286],[-13.2634195,11.2431572],[-13.2629458,11.2414976],[-13.2628262,11.2401681],[-13.2627082,11.2388738],[-13.2620117,11.2364885],[-13.2619679,11.2361747],[-13.2619867,11.2358327],[-13.2620752,11.2351486],[-13.2621932,11.233749],[-13.2616979,11.2328869],[-13.2610506,11.2324784],[-13.2604659,11.23196],[-13.2600313,11.2312288],[-13.259849,11.230842],[-13.2598114,11.2306473],[-13.2598311,11.2304297],[-13.2604873,11.2297607],[-13.2612606,11.2291853],[-13.2617801,11.2287426],[-13.2623139,11.2282454],[-13.2626814,11.2274351],[-13.2628906,11.227072],[-13.2631919,11.226807],[-13.2647896,11.2259722],[-13.2655326,11.225575],[-13.2661584,11.2250864],[-13.2662487,11.2245753],[-13.2662165,11.2239517],[-13.2660046,11.2237465],[-13.2657391,11.223615],[-13.2651525,11.2234211],[-13.2636711,11.223444],[-13.2629925,11.2234387],[-13.2627296,11.2234098],[-13.2624945,11.2233394],[-13.2623649,11.2231151],[-13.2622415,11.2227705],[-13.2620028,11.2221022],[-13.261697,11.2214498],[-13.2613277,11.2209401],[-13.2592222,11.2190511],[-13.2568967,11.218017],[-13.2565472,11.2180282],[-13.2561958,11.2181163],[-13.2556817,11.218567],[-13.2551175,11.2191477],[-13.2548989,11.2192805],[-13.254683,11.2193633],[-13.2542485,11.2192161],[-13.2538784,11.2190581],[-13.2535833,11.2187057],[-13.2533956,11.2182794],[-13.2533956,11.2177427],[-13.2536638,11.2172165],[-13.254362,11.2162833],[-13.25486,11.2156117],[-13.2552195,11.2144487],[-13.2557354,11.2128735],[-13.256067,11.2120492],[-13.2558104,11.2111476],[-13.2539758,11.2096426],[-13.2536316,11.2090393],[-13.2539535,11.2077659],[-13.2543719,11.2071871],[-13.2547804,11.2064327],[-13.2548118,11.2061821],[-13.2546723,11.2057979],[-13.2544094,11.2052664],[-13.2543129,11.2042351],[-13.2547375,11.2032807],[-13.2559177,11.2016757],[-13.2564292,11.2004777],[-13.2567645,11.1999594],[-13.2571407,11.1994761],[-13.2579446,11.1985465],[-13.2580099,11.197308],[-13.2574449,11.1958776],[-13.2573974,11.1957575],[-13.2572481,11.1943822],[-13.2575798,11.1927158],[-13.258042,11.191109],[-13.2593072,11.1892111],[-13.2594949,11.1883271],[-13.2595548,11.187541],[-13.2592106,11.1867166],[-13.2584926,11.1860149],[-13.2580358,11.1857116],[-13.2575826,11.1855584],[-13.2566419,11.1853413],[-13.2535788,11.1846888],[-13.2531971,11.1845644],[-13.2529664,11.1843064],[-13.2523012,11.1832013],[-13.2517165,11.1824488],[-13.251315,11.1815944],[-13.2513571,11.1806648],[-13.2514858,11.1798016],[-13.251502,11.1792964],[-13.2514376,11.1788966],[-13.2512721,11.177979],[-13.2509977,11.1765178],[-13.2508644,11.1753318],[-13.2510781,11.1747811],[-13.2516467,11.1741864],[-13.2521939,11.1736022],[-13.2521296,11.1732287],[-13.2518891,11.1729478],[-13.2511963,11.1724549],[-13.2506069,11.1721058],[-13.2500911,11.1719919],[-13.2495493,11.1720339],[-13.2483422,11.1723392],[-13.2480098,11.1723391],[-13.2477307,11.1722444],[-13.2474786,11.1720287],[-13.2473016,11.1717181],[-13.2467553,11.1707427],[-13.2462832,11.1684798],[-13.2458694,11.1669632],[-13.2456287,11.1654483],[-13.2458219,11.1627116],[-13.2458317,11.1610135],[-13.2461759,11.159459],[-13.2463145,11.1586346],[-13.246648,11.1577855],[-13.2468295,11.1570662],[-13.246851,11.1566978],[-13.2466042,11.156182],[-13.2458326,11.155554],[-13.2448232,11.1550557],[-13.2438684,11.1543084],[-13.2417986,11.1529645],[-13.2398343,11.1520558],[-13.2391477,11.1515505],[-13.2389983,11.1510487],[-13.2387614,11.1500663],[-13.2382259,11.1484697],[-13.2370878,11.1463294],[-13.2361713,11.1441855],[-13.2350279,11.1420241],[-13.2345022,11.1411451],[-13.2344278,11.140438],[-13.2350823,11.138638],[-13.235457,11.1377555],[-13.2354088,11.1373029],[-13.2352371,11.1368923],[-13.2342669,11.1362747],[-13.2337619,11.1359186],[-13.2334086,11.1353957],[-13.233086,11.1341396],[-13.2328722,11.1328587],[-13.2324583,11.1311078],[-13.2322813,11.1303551],[-13.2319817,11.1298059],[-13.2299756,11.1283284],[-13.2283841,11.1285523],[-13.2275527,11.1270186],[-13.2271952,11.1269534],[-13.2265772,11.1279781],[-13.2263305,11.1293355],[-13.2259148,11.1297515],[-13.2239219,11.1297579],[-13.2235597,11.1294756],[-13.2224992,11.1286489],[-13.2216775,11.1288203],[-13.2197316,11.1308741],[-13.216929,11.1313323],[-13.2154699,11.1311534],[-13.2137747,11.1316271],[-13.2115218,11.1325008],[-13.2103309,11.135322],[-13.2068279,11.1373169],[-13.2050032,11.1378134],[-13.2032498,11.1375537],[-13.2020367,11.1357554],[-13.2014903,11.1354167],[-13.198743,11.1359449],[-13.197644,11.1352799],[-13.1978264,11.1336061],[-13.1972954,11.1328166],[-13.1955573,11.1335114],[-13.1948707,11.1352799],[-13.1938514,11.1366379],[-13.1926283,11.1379116],[-13.1917271,11.1403012],[-13.1910128,11.1403819],[-13.1893016,11.1401399],[-13.1880862,11.1403222],[-13.1867576,11.1406491],[-13.1865924,11.1406919],[-13.18294,11.1416381],[-13.1807943,11.1430696],[-13.1804181,11.143819],[-13.1802331,11.1447427],[-13.1795391,11.1456855],[-13.1786138,11.1476645],[-13.1786075,11.1482901],[-13.1787095,11.1487405],[-13.1787924,11.1491972],[-13.1787478,11.1496726],[-13.1785884,11.1499416],[-13.1783205,11.1502231],[-13.1778233,11.1507673],[-13.1764332,11.1514242],[-13.1753137,11.1518229],[-13.1737363,11.152619],[-13.1734429,11.1527441],[-13.1733027,11.1527566],[-13.1730987,11.1525502],[-13.1714983,11.1501981],[-13.1705992,11.1486779],[-13.1695089,11.1469514],[-13.1688969,11.1458879],[-13.1683931,11.1447619],[-13.1680871,11.1441676],[-13.1677428,11.1432355],[-13.1673858,11.1423472],[-13.1671051,11.1413149],[-13.167016,11.1408145],[-13.1669267,11.1401514],[-13.1668056,11.1397072],[-13.1665888,11.1394695],[-13.1662764,11.1394132],[-13.1659702,11.1395008],[-13.1644846,11.1411148],[-13.1637961,11.1421219],[-13.1632541,11.1429227],[-13.1625719,11.1440863],[-13.1624495,11.1444561],[-13.1619533,11.145425],[-13.1598194,11.1486277],[-13.1581779,11.1506066],[-13.1566001,11.1499612],[-13.1550711,11.1493717],[-13.1546367,11.1490138],[-13.1545508,11.1485085],[-13.1545402,11.1479506],[-13.1541654,11.1472066],[-13.153891,11.1469138],[-13.1533983,11.146854],[-13.1494492,11.1493611],[-13.1456037,11.1522066],[-13.141703,11.1548558],[-13.139053,11.1562137],[-13.1367578,11.157396],[-13.1350914,11.1579768],[-13.1341741,11.1582426],[-13.1337824,11.1583505],[-13.1334822,11.1585057],[-13.1332245,11.1588768],[-13.1329966,11.1593531],[-13.132554,11.1604741],[-13.1317903,11.1627326],[-13.1308347,11.1639766],[-13.1304538,11.1645345],[-13.1301883,11.1647371],[-13.1299014,11.1648027],[-13.1263138,11.1629806],[-13.1226091,11.1614736],[-13.1222946,11.1614978],[-13.1217527,11.1616978],[-13.1205519,11.1620906],[-13.1172045,11.1634905],[-13.1163884,11.1639186],[-13.1158171,11.1651896],[-13.1148757,11.1664764],[-13.1141568,11.1688341],[-13.1118723,11.1684165],[-13.1101496,11.1678974],[-13.1093235,11.1660764],[-13.1082399,11.1662185],[-13.1068827,11.1663606],[-13.1053223,11.1658536],[-13.1018086,11.166322],[-13.0981394,11.166785],[-13.0980823,11.1667185],[-13.0980797,11.1665948],[-13.0983318,11.1650554],[-13.0978061,11.1641607],[-13.0966802,11.1641642],[-13.095362,11.1646401],[-13.0943534,11.1656051],[-13.0939728,11.1667703],[-13.0939383,11.1671974],[-13.0936132,11.1674835],[-13.0935722,11.1686598],[-13.0933825,11.1688815],[-13.0930532,11.1688552],[-13.0928052,11.1685465],[-13.0923701,11.1680161],[-13.0914707,11.1682657],[-13.0906321,11.1687679],[-13.0903374,11.1706033],[-13.0902691,11.1709445],[-13.0901081,11.1710024],[-13.0899472,11.1709445],[-13.0891479,11.1704288],[-13.0880972,11.1692165],[-13.0868955,11.168206],[-13.0846639,11.1670272],[-13.081574,11.1671956],[-13.0795141,11.168206],[-13.0777009,11.1702585],[-13.0762525,11.1715742],[-13.0732055,11.1737214],[-13.0722929,11.1734233],[-13.0717142,11.1728794],[-13.0717779,11.1702235],[-13.0707594,11.1697217],[-13.0692037,11.1701639],[-13.0677331,11.1722024],[-13.0672073,11.1739074],[-13.0665422,11.1755178],[-13.0657697,11.1767809],[-13.0651152,11.1777283],[-13.0630553,11.1778755],[-13.0620575,11.1777072],[-13.0598581,11.1781124],[-13.0590427,11.177602],[-13.0586189,11.1773493],[-13.0546929,11.178079],[-13.0525632,11.1793209],[-13.0516776,11.179218],[-13.050857,11.1790194],[-13.0499102,11.1782927],[-13.0492646,11.1767118],[-13.0485882,11.1767161],[-13.0467268,11.1783105],[-13.0456433,11.1791406],[-13.0448007,11.1806801],[-13.0430865,11.1822412],[-13.042036,11.1834138],[-13.0414893,11.183709],[-13.0387026,11.1843038],[-13.0340908,11.1843432],[-13.0329793,11.1844687],[-13.0321157,11.1851388],[-13.0301379,11.1863273],[-13.0282171,11.1887257],[-13.0256124,11.189425],[-13.0238958,11.1884146],[-13.0221792,11.1879094],[-13.018231,11.1879095],[-13.0147977,11.1868991],[-13.0110212,11.1867307],[-13.0085757,11.1863249],[-13.007369,11.1867793],[-13.0062788,11.1870835],[-13.0057607,11.1878341],[-13.0056829,11.1883059],[-13.0055248,11.1885714],[-13.0040427,11.1893996],[-13.0022867,11.1905184],[-13.0006082,11.1914756],[-13.0000512,11.19163],[-12.9997177,11.1915107],[-12.9994597,11.1915278],[-12.997532,11.1940056],[-12.9954762,11.1964582],[-12.9940414,11.1980543],[-12.9931881,11.1992127],[-12.9929755,11.2000636],[-12.991864,11.2011374],[-12.9904682,11.2010935],[-12.9892815,11.2000112],[-12.9889967,11.1989561],[-12.98862,11.1986343],[-12.9871177,11.2001761],[-12.9861523,11.2018395],[-12.9840544,11.2050523],[-12.9816671,11.2081167],[-12.9789205,11.2155257],[-12.9783036,11.2166686],[-12.9777152,11.2170136],[-12.9769125,11.2169626],[-12.9760628,11.2163422],[-12.9756132,11.2158801],[-12.9751264,11.2153755],[-12.9739086,11.2154822],[-12.9732455,11.2159421],[-12.9728643,11.2165001],[-12.9726442,11.2171674],[-12.9728851,11.2181993],[-12.9731081,11.2186648],[-12.9730833,11.2193003],[-12.9725897,11.2199738],[-12.9727292,11.2210157],[-12.9727882,11.2218891],[-12.9725629,11.2226837],[-12.9724234,11.2235782],[-12.9820927,11.2387483],[-12.9718628,11.2514935],[-12.9677155,11.263967],[-12.9572092,11.2796937],[-12.9541067,11.2822832],[-12.9442145,11.2905392],[-12.9295608,11.2889124],[-12.9198839,11.2981308],[-12.918225,11.3152112],[-12.9290079,11.3409654],[-12.9240312,11.3691568],[-12.9185015,11.3764753],[-12.9048259,11.379488],[-12.8938945,11.3818963],[-12.8852789,11.395533],[-12.8786879,11.4068314],[-12.869564,11.4136069],[-12.8607165,11.4271573],[-12.858416,11.4271886],[-12.8408097,11.4274283],[-12.8294739,11.4342033],[-12.8175851,11.4455849],[-12.7910428,11.4550692],[-12.7833012,11.4596758],[-12.7790065,11.4777114],[-12.7776743,11.4793993],[-12.777286,11.4792229],[-12.7770718,11.4787722],[-12.7772747,11.4783572],[-12.7769723,11.478172],[-12.7764426,11.478509],[-12.7757875,11.4792292],[-12.7752817,11.480063],[-12.7735029,11.4815873],[-12.7728618,11.4823744],[-12.7725896,11.4823849],[-12.7722932,11.4821013],[-12.7719856,11.4819406],[-12.7715761,11.4821126],[-12.7715298,11.4828913],[-12.77127,11.4829948],[-12.7709505,11.4823952],[-12.7706508,11.4821693],[-12.7702386,11.4824142],[-12.7702791,11.4827236],[-12.7692712,11.4835539],[-12.7687647,11.483946],[-12.7684595,11.4834883],[-12.7677761,11.482849],[-12.7676104,11.4826306],[-12.7679621,11.4819717],[-12.7665792,11.4822038],[-12.7660168,11.4821358],[-12.7653365,11.4822311],[-12.764888,11.4820191],[-12.764094,11.4823148],[-12.7633007,11.4821889],[-12.7627486,11.482244],[-12.7625844,11.4825905],[-12.7630789,11.4834008],[-12.7641811,11.4844883],[-12.7641478,11.4846261],[-12.7636396,11.4847665],[-12.7624729,11.4847885],[-12.7577925,11.4834016],[-12.7576652,11.4837401],[-12.7584258,11.4845907],[-12.7593881,11.4859216],[-12.7598594,11.4863615],[-12.7602142,11.4874488],[-12.7604509,11.4879833],[-12.7602445,11.4885834],[-12.7599839,11.4888797],[-12.7572567,11.485528],[-12.7565311,11.4853929],[-12.7551477,11.4865461],[-12.7535733,11.4873436],[-12.753053,11.4874903],[-12.7518574,11.4872758],[-12.7517661,11.487666],[-12.7516974,11.4876696],[-12.7516222,11.4872555],[-12.7517135,11.4866567],[-12.7520146,11.4863147],[-12.7531577,11.4855956],[-12.7537032,11.4849998],[-12.753465,11.4845127],[-12.752424,11.4840108],[-12.7517955,11.4841121],[-12.7513788,11.4843163],[-12.7510177,11.48437],[-12.7505912,11.4849399],[-12.7510187,11.4856846],[-12.7505466,11.4867501],[-12.7497409,11.4875087],[-12.7496841,11.4881203],[-12.7505269,11.4889774],[-12.7510927,11.4905209],[-12.7514523,11.4911644],[-12.7517639,11.4917751],[-12.7518253,11.4925272],[-12.752195,11.4934252],[-12.7528049,11.4942561],[-12.7525917,11.4954541],[-12.7518878,11.4960213],[-12.751852,11.4968436],[-12.7523179,11.4974229],[-12.7529245,11.497531],[-12.7537315,11.4971357],[-12.7547529,11.4972747],[-12.7559735,11.4985989],[-12.7558765,11.4991556],[-12.7557919,11.4996391],[-12.7554427,11.4999418],[-12.7550502,11.5001067],[-12.7540357,11.5001971],[-12.7529514,11.5005464],[-12.7518927,11.4999299],[-12.7503305,11.5002395],[-12.7505116,11.5011469],[-12.7515221,11.5014563],[-12.7519662,11.5023716],[-12.7527326,11.502717],[-12.7532589,11.5041276],[-12.7542185,11.5045391],[-12.754203,11.5055126],[-12.7569809,11.5065798],[-12.7574171,11.5070874],[-12.757378,11.5076116],[-12.75687,11.5082231],[-12.7551142,11.5098311],[-12.7564559,11.5110472],[-12.7567839,11.5113953],[-12.756744,11.5121123],[-12.7560086,11.5127005],[-12.7554726,11.5138436],[-12.7551046,11.5144496],[-12.7542084,11.5150768],[-12.754127,11.5164813],[-12.7542059,11.518337],[-12.7546455,11.519141],[-12.7538423,11.5203075],[-12.7530242,11.5208105],[-12.7529602,11.5212497],[-12.752788,11.5214079],[-12.7513824,11.5214015],[-12.7510112,11.5219991],[-12.7511183,11.5228913],[-12.7528779,11.522914],[-12.7535444,11.5231498],[-12.7534922,11.5237811],[-12.7525651,11.524492],[-12.7507616,11.5246707],[-12.7502729,11.5234737],[-12.7489947,11.5210127],[-12.7480426,11.5207918],[-12.7451348,11.5227344],[-12.7430153,11.5229421],[-12.7422697,11.5226628],[-12.7407597,11.5228558],[-12.7369462,11.5214892],[-12.7361254,11.521433],[-12.734843,11.523624],[-12.7352338,11.5245638],[-12.736315,11.5248666],[-12.7365529,11.5254622],[-12.7363339,11.5263743],[-12.7349351,11.5267617],[-12.7346102,11.5273188],[-12.7358734,11.5286833],[-12.7361841,11.5292162],[-12.7351858,11.5301671],[-12.7327805,11.5302268],[-12.7313599,11.5305914],[-12.7314241,11.5324806],[-12.7311288,11.5330148],[-12.7307199,11.5337545],[-12.7300279,11.5331606],[-12.7285539,11.5330087],[-12.7273195,11.5345958],[-12.7283745,11.5356927],[-12.7283411,11.5361007],[-12.7270655,11.5363944],[-12.7271644,11.5381849],[-12.7228658,11.5415365],[-12.722898,11.542532],[-12.7223818,11.5438354],[-12.7213195,11.5450394],[-12.720526,11.5487684],[-12.7192648,11.548623],[-12.7170737,11.5474927],[-12.7159784,11.5484144],[-12.7141679,11.5491761],[-12.7132978,11.5485735],[-12.710334,11.548316],[-12.7093444,11.5489813],[-12.7070589,11.5526236],[-12.7052326,11.5527087],[-12.7039826,11.5529995],[-12.703135,11.5534198],[-12.7025503,11.5540454],[-12.7019817,11.5550912],[-12.7019441,11.555438],[-12.7032101,11.5572146],[-12.7033442,11.5577295],[-12.7032813,11.5579603],[-12.7031136,11.5584022],[-12.7023518,11.5590592],[-12.7021319,11.5592747],[-12.7017993,11.5593377],[-12.7015418,11.5592799],[-12.7013755,11.559159],[-12.701295,11.5590014],[-12.7013326,11.5588018],[-12.7018154,11.5583549],[-12.7019656,11.5579187],[-12.7019548,11.557514],[-12.7018529,11.5572618],[-12.701456,11.5570883],[-12.7011716,11.5570515],[-12.700721,11.5571566],[-12.7004045,11.5574405],[-12.699573,11.5586019],[-12.6991493,11.5588069],[-12.6980013,11.5587282],[-12.6954961,11.5589752],[-12.694965,11.5592958],[-12.6947343,11.5597056],[-12.6945949,11.5610984],[-12.6950401,11.5624912],[-12.6951313,11.563332],[-12.6948007,11.5639723],[-12.6942569,11.5643726],[-12.6936668,11.5645251],[-12.6921916,11.5642781],[-12.6892794,11.5650929],[-12.6885327,11.566287],[-12.6891185,11.5666748],[-12.6911967,11.5661361],[-12.691398,11.5663768],[-12.6912242,11.5670754],[-12.6917285,11.5677558],[-12.6921783,11.5695873],[-12.6933877,11.5697367],[-12.6942576,11.5705948],[-12.6942958,11.5710636],[-12.6940165,11.571645],[-12.6938773,11.5726214],[-12.6946587,11.5734892],[-12.6977966,11.5748962],[-12.7002264,11.5754138],[-12.7012827,11.5791387],[-12.7007157,11.5812633],[-12.7009016,11.5819944],[-12.7019012,11.5819255],[-12.7029095,11.581836],[-12.7054434,11.5824117],[-12.7085085,11.5876924],[-12.707586,11.5882346],[-12.7047573,11.5875951],[-12.7019381,11.5895836],[-12.7017966,11.5904704],[-12.7017295,11.5913585],[-12.7016625,11.5921756],[-12.7016437,11.5926065],[-12.7016358,11.5931367],[-12.7017081,11.593471],[-12.701987,11.5937127],[-12.702443,11.5937127],[-12.7027863,11.5936707],[-12.703135,11.5939124],[-12.7042641,11.5944125],[-12.7048069,11.594801],[-12.7048999,11.5952156],[-12.7049106,11.5956308],[-12.7043048,11.5962282],[-12.7038163,11.5965346],[-12.7031205,11.5966893],[-12.7022553,11.5966134],[-12.7011299,11.5956305],[-12.7006191,11.5958199],[-12.7000298,11.5961351],[-12.6998949,11.5966607],[-12.6999217,11.5975173],[-12.700029,11.5979114],[-12.7001792,11.598337],[-12.7004782,11.5991453],[-12.7005923,11.5999976],[-12.7002046,11.6009922],[-12.6996706,11.6033986],[-12.6958937,11.606147],[-12.6941352,11.608751],[-12.6936572,11.6099851],[-12.6938738,11.6110061],[-12.6936165,11.6116097],[-12.6939926,11.6135339],[-12.6940879,11.6152642],[-12.6948212,11.615565],[-12.6986372,11.6147926],[-12.7003265,11.6177917],[-12.7020662,11.6205608],[-12.7044469,11.6240586],[-12.7049108,11.6252547],[-12.7055275,11.6253127],[-12.7061447,11.6250766],[-12.7067114,11.625103],[-12.7075522,11.6252447],[-12.7080195,11.6257025],[-12.7086609,11.6261344],[-12.7093126,11.6263359],[-12.7100263,11.6255468],[-12.7106664,11.6252236],[-12.7108419,11.624728],[-12.7117296,11.623401],[-12.7129037,11.622593],[-12.7132772,11.6216174],[-12.7131792,11.6210769],[-12.7123389,11.6208252],[-12.7121833,11.620527],[-12.7124665,11.6201476],[-12.7139714,11.6198473],[-12.7148749,11.619626],[-12.7161408,11.6196995],[-12.7169762,11.6198483],[-12.7180438,11.6200497],[-12.7187898,11.6199453],[-12.7194018,11.6192425],[-12.7195812,11.6184775],[-12.7192749,11.6175958],[-12.7196398,11.6171022],[-12.720295,11.6160203],[-12.7208834,11.6157112],[-12.7219311,11.6158578],[-12.7231013,11.6171295],[-12.7234583,11.6187213],[-12.7237618,11.6199968],[-12.7247201,11.6213578],[-12.7250711,11.6230396],[-12.7255802,11.6245454],[-12.7266744,11.6246985],[-12.727508,11.6238514],[-12.7284069,11.6218244],[-12.7297879,11.6216815],[-12.7309972,11.623504],[-12.7326183,11.625073],[-12.7331445,11.6258767],[-12.7328404,11.6271335],[-12.7330903,11.6276929],[-12.7338308,11.6278119],[-12.7346442,11.6276626],[-12.7357432,11.6270614],[-12.7368202,11.6260811],[-12.7374711,11.6258313],[-12.7388628,11.6260479],[-12.7394138,11.6263087],[-12.7400171,11.6266732],[-12.7411402,11.6266637],[-12.7417034,11.6269061],[-12.7421012,11.6276199],[-12.7420391,11.6283252],[-12.7414733,11.6294608],[-12.7416214,11.6301404],[-12.7439505,11.6321929],[-12.7456406,11.6339284],[-12.7467188,11.6346067],[-12.7476641,11.63452],[-12.7494084,11.6335378],[-12.7496244,11.6329787],[-12.749638,11.6318332],[-12.7499908,11.6310586],[-12.7509398,11.6308739],[-12.7516645,11.6311505],[-12.752192,11.6318799],[-12.752192,11.6325869],[-12.7519224,11.6330753],[-12.7518782,11.6339046],[-12.7524953,11.6351467],[-12.7525342,11.6359586],[-12.7523877,11.6371848],[-12.7518809,11.638808],[-12.7520491,11.6402769],[-12.752318,11.6409061],[-12.7531228,11.6413933],[-12.7541838,11.641604],[-12.7586924,11.6403423],[-12.7590682,11.6407537],[-12.7591548,11.6413712],[-12.7588712,11.6431832],[-12.7588849,11.6456393],[-12.7590573,11.6464552],[-12.7600024,11.6476018],[-12.7607136,11.6480258],[-12.7623245,11.6471962],[-12.7630973,11.6472202],[-12.764324,11.6481788],[-12.7663254,11.6507309],[-12.7670531,11.6523543],[-12.767581,11.6533618],[-12.7682239,11.6549754],[-12.7684202,11.6563333],[-12.7679389,11.6575307],[-12.7666485,11.6591212],[-12.7655337,11.6607876],[-12.7653351,11.6623238],[-12.7656112,11.6638302],[-12.7661557,11.6648571],[-12.7672704,11.6655717],[-12.7693406,11.6657455],[-12.7716036,11.6652719],[-12.7730783,11.6650192],[-12.7738827,11.6656014],[-12.7744186,11.6668863],[-12.7745431,11.6676701],[-12.774111,11.6684147],[-12.7732863,11.6687307],[-12.7701593,11.6692756],[-12.7688344,11.6697548],[-12.7686123,11.6705375],[-12.7688666,11.6712846],[-12.7708956,11.6731953],[-12.7729765,11.6745666],[-12.7752058,11.6752177],[-12.7776854,11.6751424],[-12.7805368,11.6758125],[-12.7815872,11.6762205],[-12.7819045,11.6769564],[-12.7805391,11.6795755],[-12.7781554,11.6824558],[-12.777688,11.6835901],[-12.7781343,11.6850153],[-12.7778302,11.6868585],[-12.7778714,11.6877855],[-12.7785026,11.6884656],[-12.7804871,11.6892086],[-12.7815001,11.689656],[-12.7828537,11.6894383],[-12.7835559,11.6890137],[-12.7841997,11.6880393],[-12.785033,11.6871507],[-12.7866869,11.6865502],[-12.7881716,11.6865502],[-12.7905017,11.6861353],[-12.7924954,11.6859078],[-12.7943232,11.6850994],[-12.7953343,11.6840902],[-12.7963551,11.6832604],[-12.7969513,11.6825792],[-12.7977241,11.6808952],[-12.7981107,11.6802465],[-12.7993096,11.679307],[-12.7999386,11.6792098],[-12.8002056,11.6794422],[-12.8004356,11.6802307],[-12.8010869,11.6808122],[-12.8013799,11.681906],[-12.8014198,11.6828622],[-12.8019985,11.6834708],[-12.8032679,11.6838342],[-12.8042552,11.6843633],[-12.8063067,11.6863354],[-12.8068018,11.688144],[-12.8074251,11.6890695],[-12.8088372,11.689953],[-12.8097746,11.6904217],[-12.8111911,11.6904217],[-12.8134343,11.6909939],[-12.8163912,11.6929986],[-12.8179946,11.6949907],[-12.8197136,11.6980398],[-12.8197458,11.7003413],[-12.8189578,11.7045532],[-12.818924,11.7061414],[-12.8193192,11.7069154],[-12.8109885,11.7096875],[-12.8023138,11.7140868],[-12.7877319,11.7221313],[-12.7851904,11.7405075],[-12.779814,11.7548631],[-12.7965985,11.7748891],[-12.8007458,11.7962708],[-12.7954926,11.8158918],[-12.8010223,11.8348349],[-12.7956309,11.8369997],[-12.7782923,11.8378972],[-12.7686353,11.8399288],[-12.7683998,11.8602097],[-12.7644898,11.8831683],[-12.7544973,11.9056999],[-12.775351,11.9239788],[-12.7949014,11.9358807],[-12.7918602,11.9550077],[-12.7883573,11.9646032],[-12.7831712,11.9788083],[-12.8009837,11.9953824],[-12.8257475,12.0013319],[-12.834002,12.0162049],[-12.8409533,12.05827],[-12.8261819,12.067192],[-12.8266164,12.0816366],[-12.8144517,12.1003284],[-12.8200996,12.1168951],[-12.8240096,12.1258152],[-12.820534,12.1355844],[-12.8326987,12.1470522],[-12.8370432,12.1619172],[-12.8366088,12.1806035],[-12.830092,12.1967405],[-12.8257475,12.220095],[-12.8131483,12.2476931],[-12.8096727,12.2684958],[-12.7896879,12.2761372],[-12.7731788,12.271892],[-12.7544973,12.2617033],[-12.7345125,12.2706184],[-12.6954119,12.3181611],[-12.6641313,12.3419292],[-12.6537045,12.3453245],[-12.6245962,12.3381095],[-12.58593,12.3495685],[-12.5733309,12.3589051],[-12.569285,12.3700295],[-12.568499,12.370283],[-12.570393,12.372242],[-12.571633,12.37394],[-12.5726131,12.375115],[-12.5732011,12.37616],[-12.5748331,12.378381],[-12.5770541,12.381711],[-12.5783601,12.383409],[-12.5797311,12.385303],[-12.5802541,12.386217],[-12.5816251,12.387915],[-12.5839761,12.390397],[-12.5843681,12.391376],[-12.5855431,12.393662],[-12.5855431,12.398625],[-12.5852821,12.399278],[-12.5849561,12.39954],[-12.5846291,12.399931],[-12.5843031,12.400715],[-12.5841061,12.401433],[-12.5839761,12.402348],[-12.5841061,12.403131],[-12.5841061,12.40398],[-12.5838451,12.404764],[-12.5837151,12.405678],[-12.5834531,12.406462],[-12.5832571,12.407246],[-12.5831921,12.407833],[-12.5833881,12.408356],[-12.5838451,12.408552],[-12.5846291,12.408421],[-12.5865231,12.40718],[-12.5876981,12.406658],[-12.5890701,12.406201],[-12.5900491,12.405939],[-12.5914211,12.405613],[-12.5939021,12.405156],[-12.5956001,12.405025],[-12.5972381,12.404978],[-12.5974771,12.40549],[-12.5976461,12.405736],[-12.5979771,12.405936],[-12.5988381,12.406312],[-12.5993681,12.406746],[-12.5998141,12.406949],[-12.6003021,12.407243],[-12.6013101,12.408212],[-12.6014531,12.408419],[-12.6017941,12.40854],[-12.6024821,12.408627],[-12.6030181,12.408977],[-12.6033421,12.408986],[-12.6037181,12.408748],[-12.6039131,12.408743],[-12.6042761,12.408877],[-12.6048121,12.409349],[-12.6048251,12.409518],[-12.6047171,12.409768],[-12.6047041,12.410088],[-12.6050461,12.410594],[-12.6050551,12.41075],[-12.6050031,12.410932],[-12.6048171,12.411092],[-12.6048341,12.411476],[-12.6049331,12.411883],[-12.6052151,12.412207],[-12.6054661,12.412315],[-12.6058501,12.412363],[-12.6059451,12.412436],[-12.6059501,12.412532],[-12.6056381,12.412839],[-12.6054911,12.413063],[-12.6054741,12.413539],[-12.6055691,12.413725],[-12.6056951,12.413896],[-12.6058721,12.413973],[-12.6066181,12.414088],[-12.6071101,12.414342],[-12.6074791,12.414734],[-12.6079331,12.415072],[-12.6085711,12.415441],[-12.6087631,12.415634],[-12.6088161,12.415764],[-12.6088621,12.416204],[-12.6089771,12.41644],[-12.6095541,12.41693],[-12.6098591,12.417582],[-12.6102801,12.417847],[-12.6102971,12.418043],[-12.6102341,12.418418],[-12.6103031,12.418579],[-12.6105111,12.418792],[-12.6105111,12.418948],[-12.6106261,12.419432],[-12.6108451,12.419715],[-12.6113531,12.420165],[-12.6114621,12.420914],[-12.6116641,12.421393],[-12.6119121,12.421848],[-12.6123331,12.422407],[-12.6122351,12.422771],[-12.6122351,12.422938],[-12.6122861,12.423249],[-12.6122691,12.423428],[-12.6124141,12.423849],[-12.6124081,12.424235],[-12.6126041,12.424512],[-12.6130241,12.42476],[-12.6134281,12.424777],[-12.6135381,12.424864],[-12.6135611,12.42514],[-12.6134861,12.4254],[-12.6134571,12.425734],[-12.6134741,12.425855],[-12.6135781,12.426011],[-12.6137221,12.426098],[-12.6139641,12.426098],[-12.6142531,12.425988],[-12.6144491,12.426011],[-12.6148811,12.426443],[-12.6152331,12.426657],[-12.6153541,12.426841],[-12.6154001,12.427383],[-12.6155331,12.427464],[-12.6157061,12.427493],[-12.6162411,12.427523],[-12.6165691,12.427666],[-12.6179231,12.42866],[-12.6182101,12.428896],[-12.6184141,12.429142],[-12.6187941,12.42989],[-12.6191521,12.430331],[-12.6193781,12.430444],[-12.6202691,12.430711],[-12.6209171,12.430729],[-12.6210251,12.430824],[-12.6211221,12.431088],[-12.6212531,12.431219],[-12.6218601,12.431542],[-12.6222361,12.431942],[-12.6222751,12.432295],[-12.6222601,12.43301],[-12.6223211,12.433441],[-12.6224711,12.433753],[-12.6226481,12.433917],[-12.6228041,12.434017],[-12.6229551,12.434051],[-12.6235911,12.434047],[-12.6239071,12.43425],[-12.6239841,12.434354],[-12.6265581,12.435902],[-12.6691621,12.441394],[-12.6704331,12.441014],[-12.6708231,12.439885],[-12.6718853,12.4398133],[-12.7652451,12.433511],[-12.7652101,12.433802],[-12.7648501,12.434177],[-12.7646691,12.434281],[-12.7645441,12.434454],[-12.7645371,12.434551],[-12.7647801,12.435141],[-12.7650991,12.435363],[-12.7650331,12.436449],[-12.7650971,12.436893],[-12.7652231,12.437225],[-12.7653261,12.438096],[-12.7651991,12.438437],[-12.7649781,12.438769],[-12.7642651,12.439403],[-12.7641231,12.439585],[-12.7640601,12.439814],[-12.7631491,12.440622],[-12.7627931,12.441081],[-12.7624841,12.441263],[-12.7622541,12.441342],[-12.7620801,12.441485],[-12.7619851,12.441714],[-12.7618111,12.441968],[-12.7617161,12.442237],[-12.7613911,12.442633],[-12.7611221,12.442847],[-12.7606001,12.44314],[-12.7601481,12.443535],[-12.7597051,12.444177],[-12.7596571,12.444343],[-12.7595151,12.444557],[-12.7593491,12.444731],[-12.7591901,12.445016],[-12.7591351,12.445246],[-12.7591351,12.4454829],[-12.7591821,12.4458159],[-12.7592851,12.4460529],[-12.7593251,12.4465999],[-12.7594041,12.4468689],[-12.7597211,12.447534],[-12.7593571,12.448634],[-12.7591981,12.44884],[-12.7587861,12.449125],[-12.7582321,12.44941],[-12.7578921,12.449489],[-12.7572191,12.449553],[-12.7570451,12.449663],[-12.7563001,12.449948],[-12.7556991,12.449988],[-12.7554771,12.450091],[-12.7552631,12.450273],[-12.7550261,12.450637],[-12.7550261,12.45112],[-12.7551211,12.451294],[-12.7553031,12.45192],[-12.7553741,12.452268],[-12.7553661,12.452664],[-12.7559361,12.454525],[-12.7560151,12.454992],[-12.7560311,12.455522],[-12.7559201,12.455704],[-12.7555801,12.456037],[-12.7554931,12.456195],[-12.7554301,12.456417],[-12.7554691,12.4569],[-12.7554451,12.457145],[-12.7553031,12.457407],[-12.7552631,12.457905],[-12.7548711,12.458153],[-12.7539161,12.458649],[-12.7536201,12.459054],[-12.7535231,12.459665],[-12.7535051,12.460106],[-12.7534381,12.460282],[-12.7534561,12.460451],[-12.7536801,12.460529],[-12.7540671,12.460765],[-12.7542481,12.460898],[-12.7543511,12.461043],[-12.7543511,12.461158],[-12.7542421,12.46143],[-12.7544051,12.461763],[-12.7543871,12.461878],[-12.7538311,12.462277],[-12.7534741,12.46241],[-12.7530511,12.462646],[-12.7529731,12.462821],[-12.7529781,12.463562],[-12.7528091,12.464387],[-12.7525451,12.464725],[-12.7522171,12.465402],[-12.7517301,12.466],[-12.7513121,12.466915],[-12.7510801,12.467312],[-12.7508051,12.467645],[-12.7508311,12.467693],[-12.7512541,12.467931],[-12.7514081,12.467957],[-12.7517071,12.46794],[-12.7518831,12.467864],[-12.7518831,12.46773],[-12.7515921,12.467516],[-12.7515641,12.46731],[-12.7516261,12.467172],[-12.7518121,12.467124],[-12.7525751,12.467282],[-12.7528231,12.46742],[-12.7532291,12.467826],[-12.7534531,12.467959],[-12.7537251,12.468031],[-12.7549221,12.468002],[-12.7550751,12.467954],[-12.7553661,12.467702],[-12.7555191,12.467725],[-12.7557671,12.468136],[-12.7558191,12.46836],[-12.7559341,12.46857],[-12.7560721,12.468627],[-12.7564061,12.468665],[-12.7568351,12.468441],[-12.7569831,12.468422],[-12.7571311,12.46846],[-12.7572601,12.468699],[-12.7571641,12.469524],[-12.7571641,12.469739],[-12.7572401,12.470096],[-12.7573261,12.470268],[-12.7575891,12.470588],[-12.7580901,12.470979],[-12.7583231,12.47106],[-12.7588471,12.471048],[-12.7592771,12.47127],[-12.7602751,12.471649],[-12.7605391,12.4718989],[-12.7605471,12.472],[-12.7606821,12.472257],[-12.7613551,12.47259],[-12.7615771,12.472615],[-12.7621311,12.472543],[-12.7628581,12.472651],[-12.7629871,12.472772],[-12.7631051,12.473069],[-12.7629541,12.473334],[-12.7629721,12.47356],[-12.7631661,12.473685],[-12.7635631,12.473832],[-12.7640991,12.474282],[-12.7643681,12.4744109],[-12.7646931,12.4744399],[-12.7648441,12.4746329],[-12.7650621,12.4747829],[-12.7656701,12.4750259],[-12.7660241,12.4750119],[-12.7665181,12.4748229],[-12.7670871,12.4747439],[-12.7674371,12.4746399],[-12.7678171,12.4746619],[-12.7684571,12.4748729],[-12.7690581,12.4748479],[-12.7695231,12.4749439],[-12.7699811,12.4749409],[-12.7703611,12.4747869],[-12.7706641,12.4745649],[-12.7708191,12.4745009],[-12.7714301,12.4743649],[-12.7718241,12.474057],[-12.7719351,12.473899],[-12.7719631,12.473638],[-12.7726071,12.47337],[-12.7728651,12.473316],[-12.7733521,12.473323],[-12.7737631,12.473388],[-12.7738841,12.473122],[-12.7739661,12.473048],[-12.7743091,12.473131],[-12.7745501,12.473064],[-12.7749241,12.473092],[-12.7751711,12.473278],[-12.7753211,12.473691],[-12.7755441,12.473845],[-12.7760141,12.473822],[-12.7760911,12.473676],[-12.7762521,12.473676],[-12.7764761,12.473699],[-12.7768221,12.473806],[-12.7768681,12.473976],[-12.7769451,12.474045],[-12.7771691,12.473914],[-12.7772921,12.473953],[-12.7772691,12.4746609],[-12.7773071,12.4748299],[-12.7775841,12.4751769],[-12.7776841,12.4753689],[-12.7777081,12.4755539],[-12.7778391,12.4756469],[-12.7780231,12.4759549],[-12.7780391,12.4763239],[-12.7782001,12.4766319],[-12.7787161,12.4767629],[-12.7790241,12.4767399],[-12.7790821,12.4766639],[-12.7792561,12.4766419],[-12.7799181,12.4769229],[-12.7803501,12.4768979],[-12.7808701,12.4769739],[-12.7810721,12.4771759],[-12.7812221,12.4775679],[-12.7815051,12.4779209],[-12.7816611,12.4780359],[-12.7818581,12.4783539],[-12.7820601,12.4785209],[-12.7823371,12.4786599],[-12.7827301,12.4786999],[-12.7834111,12.4792889],[-12.7834631,12.4794619],[-12.7837461,12.479716],[-12.7837051,12.479913],[-12.7835321,12.4802529],[-12.7835611,12.4803859],[-12.7836651,12.480519],[-12.7842081,12.480496],[-12.7844391,12.480629],[-12.7845141,12.4808079],[-12.7848331,12.481139],[-12.7858901,12.481873],[-12.7863451,12.482058],[-12.7866561,12.482072],[-12.7869691,12.4821619],[-12.7873551,12.482373],[-12.7877691,12.482467],[-12.7880311,12.482658],[-12.7882221,12.482971],[-12.7881601,12.4840799],[-12.7884181,12.4844509],[-12.7884801,12.4847599],[-12.7886441,12.4849159],[-12.7888821,12.4849509],[-12.7892071,12.4850759],[-12.7895671,12.4854819],[-12.7904821,12.4854819],[-12.7911081,12.4853869],[-12.7921651,12.4850719],[-12.7926071,12.4848459],[-12.7929701,12.4845249],[-12.7931541,12.4844619],[-12.7938541,12.4840039],[-12.7940271,12.4837779],[-12.7945911,12.4834949],[-12.7947031,12.4832419],[-12.7953141,12.482548],[-12.7954821,12.4822249],[-12.7958461,12.4818319],[-12.7967301,12.481047],[-12.7971861,12.48071],[-12.7975301,12.4803739],[-12.7977681,12.480205],[-12.7984841,12.4798539],[-12.7990451,12.4797209],[-12.7993671,12.479609],[-12.7996341,12.4794549],[-12.8000341,12.4793289],[-12.8002791,12.4792999],[-12.8008611,12.4793849],[-12.8015421,12.479616],[-12.8018011,12.4797979],[-12.8020961,12.479862],[-12.8023271,12.4798329],[-12.8030001,12.4795109],[-12.8034071,12.4795739],[-12.8035621,12.4794899],[-12.8039611,12.4789219],[-12.8041231,12.4785779],[-12.8045291,12.4782199],[-12.8047611,12.4781639],[-12.8060091,12.4780449],[-12.8072811,12.4780199],[-12.8078761,12.4778989],[-12.8090801,12.4779139],[-12.8099901,12.4779779],[-12.8104741,12.4778509],[-12.8115161,12.4778989],[-12.8121471,12.4778139],[-12.8125361,12.4778779],[-12.8129361,12.4780719],[-12.8132101,12.4781089],[-12.8137721,12.4779089],[-12.8144831,12.4778669],[-12.8150091,12.4779929],[-12.8156081,12.4782829],[-12.8156611,12.4784299],[-12.8156711,12.4786609],[-12.8157241,12.4787979],[-12.8158611,12.4789559],[-12.8166551,12.4793499],[-12.8168231,12.4793869],[-12.8172811,12.4795979],[-12.8176541,12.4797219],[-12.8179411,12.4797339],[-12.8180401,12.479946],[-12.8180401,12.4801079],[-12.8181521,12.4802579],[-12.8183891,12.4802699],[-12.8186261,12.4800959],[-12.8189881,12.4800589],[-12.8192251,12.4801579],[-12.8196871,12.480915],[-12.8206971,12.481799],[-12.8209811,12.48193],[-12.8215811,12.482088],[-12.8219071,12.4822299],[-12.8220861,12.482377],[-12.8233071,12.4835709],[-12.8235121,12.4838289],[-12.8235381,12.4840129],[-12.8234281,12.4841239],[-12.8233541,12.4843179],[-12.8233591,12.4848919],[-12.8234961,12.4850289],[-12.8241221,12.4852489],[-12.8242641,12.4853439],[-12.8242161,12.4858599],[-12.8242481,12.4860439],[-12.8245061,12.4864859],[-12.8245531,12.4869539],[-12.8246371,12.4871959],[-12.8247321,12.4877429],[-12.8249581,12.4879849],[-12.8254161,12.488342],[-12.8257051,12.488405],[-12.8262681,12.488411],[-12.8264521,12.488469],[-12.8266781,12.488621],[-12.8272221,12.489319],[-12.8273691,12.489612],[-12.8285421,12.490775],[-12.8293071,12.491718],[-12.8295691,12.49197],[-12.8299891,12.492054],[-12.8311301,12.492085],[-12.8348081,12.491854],[-12.8364741,12.491854],[-12.8373021,12.491896],[-12.8378471,12.492022],[-12.8383391,12.492242],[-12.8390411,12.49242],[-12.8406551,12.492515],[-12.8411371,12.492756],[-12.8416291,12.493227],[-12.8421011,12.4935],[-12.8427091,12.493541],[-12.8446161,12.493269],[-12.8448961,12.493281],[-12.8450491,12.493359],[-12.8451161,12.493402],[-12.8451411,12.493533],[-12.8449351,12.493799],[-12.8448791,12.494288],[-12.8449251,12.494922],[-12.8450171,12.495067],[-12.8447191,12.49557],[-12.8446951,12.496087],[-12.8445071,12.496353],[-12.8444341,12.496578],[-12.8444971,12.496767],[-12.8446221,12.496925],[-12.8446661,12.497107],[-12.8445591,12.497265],[-12.8443711,12.497384],[-12.8440181,12.497441],[-12.8437781,12.497542],[-12.8436211,12.49768],[-12.8435451,12.498298],[-12.8434001,12.498468],[-12.8429911,12.498707],[-12.8427521,12.498972],[-12.8427081,12.499098],[-12.8427521,12.499249],[-12.8430351,12.499526],[-12.8429781,12.499841],[-12.842613,12.50054],[-12.842204,12.500968],[-12.842053,12.501006],[-12.841385,12.500968],[-12.84085,12.501245],[-12.840535,12.501592],[-12.840327,12.501951],[-12.840327,12.502536],[-12.840125,12.502751],[-12.839747,12.502895],[-12.839584,12.503002],[-12.839351,12.503254],[-12.839105,12.503853],[-12.838708,12.504466],[-12.838508,12.50452],[-12.838208,12.504416],[-12.838042,12.504432],[-12.837441,12.504536],[-12.837367,12.504601],[-12.837233,12.504775],[-12.837194,12.505013],[-12.837125,12.505117],[-12.83642,12.505568],[-12.836331,12.505684],[-12.836358,12.506054],[-12.836624,12.506189],[-12.83662,12.506351],[-12.836559,12.506505],[-12.836138,12.506732],[-12.835742,12.507129],[-12.835383,12.507275],[-12.834813,12.507368],[-12.834566,12.507533],[-12.834185,12.5081],[-12.833834,12.508767],[-12.833464,12.509745],[-12.833483,12.509911],[-12.833761,12.510088],[-12.833815,12.510446],[-12.833784,12.51077],[-12.833699,12.511051],[-12.83343,12.511556],[-12.833403,12.511922],[-12.833433,12.512076],[-12.833688,12.512589],[-12.833699,12.512747],[-12.833907,12.513047],[-12.833907,12.513144],[-12.833518,12.513676],[-12.833441,12.51386],[-12.833765,12.514096],[-12.833834,12.514219],[-12.833842,12.514573],[-12.833942,12.515252],[-12.833819,12.51549],[-12.833815,12.515637],[-12.833853,12.515795],[-12.834343,12.516219],[-12.834343,12.516708],[-12.834274,12.516881],[-12.83427,12.51714],[-12.834324,12.517313],[-12.834809,12.51754],[-12.835021,12.517581],[-12.835227,12.5178],[-12.835261,12.517951],[-12.835549,12.518157],[-12.835809,12.518184],[-12.836302,12.518136],[-12.837494,12.518239],[-12.838485,12.518139],[-12.839113,12.517965],[-12.839161,12.517596],[-12.839886,12.517342],[-12.84034,12.516992],[-12.840482,12.517004],[-12.840926,12.517297],[-12.841131,12.517348],[-12.841724,12.516732],[-12.841929,12.516717],[-12.8425,12.517073],[-12.842715,12.517173],[-12.842914,12.517191],[-12.843204,12.517131],[-12.843869,12.517125],[-12.844281,12.517042],[-12.845388,12.516967],[-12.845614,12.516983],[-12.845732,12.517171],[-12.845952,12.517192],[-12.846312,12.517015],[-12.846479,12.516988],[-12.846618,12.517187],[-12.846516,12.517477],[-12.846618,12.517649],[-12.846817,12.517773],[-12.847059,12.517816],[-12.847467,12.517783],[-12.847585,12.517934],[-12.847585,12.518057],[-12.84744,12.51839],[-12.847381,12.518707],[-12.847446,12.518912],[-12.847575,12.518912],[-12.847795,12.519057],[-12.84773,12.519212],[-12.847763,12.51954],[-12.847886,12.519707],[-12.848074,12.519809],[-12.848257,12.519803],[-12.848375,12.51975],[-12.848526,12.519836],[-12.848628,12.520233],[-12.848655,12.520593],[-12.848783,12.520674],[-12.849025,12.520695],[-12.849208,12.520776],[-12.849584,12.521394],[-12.849761,12.521512],[-12.850035,12.521506],[-12.850277,12.521394],[-12.850368,12.521238],[-12.850567,12.521082],[-12.851094,12.521066],[-12.851292,12.521103],[-12.851469,12.521222],[-12.851915,12.521646],[-12.852173,12.521711],[-12.853033,12.521625],[-12.853259,12.521657],[-12.853463,12.521818],[-12.853806,12.522269],[-12.853994,12.522393],[-12.854129,12.522414],[-12.854586,12.522269],[-12.854795,12.52235],[-12.854838,12.522473],[-12.855053,12.522661],[-12.85552,12.523489],[-12.855708,12.523688],[-12.85574,12.524026],[-12.855784,12.524112],[-12.856036,12.52416],[-12.856724,12.524461],[-12.857016,12.524777],[-12.857205,12.524826],[-12.85754,12.52481],[-12.857926,12.524548],[-12.85893,12.524718],[-12.859446,12.524754],[-12.85982,12.524421],[-12.860146,12.524344],[-12.860313,12.524392],[-12.860402,12.524487],[-12.860396,12.524629],[-12.860319,12.524718],[-12.8602,12.524748],[-12.860046,12.524861],[-12.859969,12.524973],[-12.86001,12.525116],[-12.860722,12.525163],[-12.860906,12.525282],[-12.861838,12.525353],[-12.862111,12.525448],[-12.8623,12.525466],[-12.862544,12.52543],[-12.862662,12.525312],[-12.862698,12.524985],[-12.862823,12.524831],[-12.863701,12.524825],[-12.864199,12.524914],[-12.864614,12.525068],[-12.865861,12.525988],[-12.866187,12.526172],[-12.866774,12.526314],[-12.867486,12.526356],[-12.867724,12.526451],[-12.86789,12.526635],[-12.867985,12.526955],[-12.868252,12.527287],[-12.868644,12.527311],[-12.868839,12.527365],[-12.86954,12.527786],[-12.8697,12.527934],[-12.869777,12.528053],[-12.869842,12.528866],[-12.869907,12.528996],[-12.870121,12.529127],[-12.870536,12.529186],[-12.870857,12.529091],[-12.871248,12.52883],[-12.871527,12.528806],[-12.871871,12.528889],[-12.872168,12.529145],[-12.872512,12.52934],[-12.872619,12.529335],[-12.873177,12.529026],[-12.873764,12.529038],[-12.874233,12.529186],[-12.874518,12.529619],[-12.874924,12.529891],[-12.875106,12.53016],[-12.875146,12.530468],[-12.875233,12.53069],[-12.875755,12.531133],[-12.876799,12.532429],[-12.877573,12.533043],[-12.87771,12.533405],[-12.877894,12.533702],[-12.877936,12.534029],[-12.877847,12.534196],[-12.877591,12.534428],[-12.877532,12.53457],[-12.877674,12.534933],[-12.87768,12.53535],[-12.877341,12.535986],[-12.877419,12.536575],[-12.877627,12.536861],[-12.877788,12.536944],[-12.878376,12.537033],[-12.878448,12.5372],[-12.878472,12.537408],[-12.878638,12.537628],[-12.87884,12.537741],[-12.879025,12.537741],[-12.879477,12.537598],[-12.879923,12.537574],[-12.880107,12.537598],[-12.880322,12.537699],[-12.880506,12.537878],[-12.880643,12.538098],[-12.880994,12.539121],[-12.881154,12.539264],[-12.881981,12.539329],[-12.882279,12.539412],[-12.882576,12.539656],[-12.8826,12.539924],[-12.882564,12.540144],[-12.882237,12.540757],[-12.882262,12.54135],[-12.882076,12.542033],[-12.882016,12.542121],[-12.881758,12.542232],[-12.881355,12.54266],[-12.881276,12.542818],[-12.881238,12.543451],[-12.88109,12.54368],[-12.881074,12.54392],[-12.880835,12.544219],[-12.880605,12.544367],[-12.880363,12.54438],[-12.880022,12.544518],[-12.879745,12.544782],[-12.879631,12.545194],[-12.879619,12.545341],[-12.879686,12.545685],[-12.87964,12.546008],[-12.879552,12.546147],[-12.879304,12.546302],[-12.879203,12.546537],[-12.879186,12.546663],[-12.879493,12.547214],[-12.879489,12.547365],[-12.879069,12.5481],[-12.878867,12.548587],[-12.879014,12.548885],[-12.87964,12.549359],[-12.879804,12.5497],[-12.879816,12.550584],[-12.879599,12.550896],[-12.879492,12.551173],[-12.879599,12.551359],[-12.879977,12.551693],[-12.880192,12.551797],[-12.88067,12.551768],[-12.881012,12.551495],[-12.880855,12.551182],[-12.88088,12.550955],[-12.880942,12.550897],[-12.88154,12.550765],[-12.881718,12.550814],[-12.881762,12.551099],[-12.881901,12.551488],[-12.882623,12.551638],[-12.883763,12.552116],[-12.884168,12.55245],[-12.88419,12.552583],[-12.884313,12.552655],[-12.884858,12.552283],[-12.885196,12.551966],[-12.885513,12.551833],[-12.886286,12.551694],[-12.886958,12.551633],[-12.887297,12.551477],[-12.887508,12.55146],[-12.88782,12.551522],[-12.888003,12.551583],[-12.88817,12.551972],[-12.888575,12.55205],[-12.888664,12.552822],[-12.888886,12.552978],[-12.88962,12.553339],[-12.890331,12.553911],[-12.890543,12.554022],[-12.891026,12.554072],[-12.891487,12.553933],[-12.892087,12.55395],[-12.89231,12.553995],[-12.892539,12.554135],[-12.892661,12.554272],[-12.892671,12.554391],[-12.892961,12.555098],[-12.893055,12.555151],[-12.893422,12.555108],[-12.893557,12.555012],[-12.893701,12.554776],[-12.893932,12.554572],[-12.894076,12.554277],[-12.894393,12.554251],[-12.894593,12.554175],[-12.894853,12.554019],[-12.895056,12.553756],[-12.895325,12.553528],[-12.895443,12.553466],[-12.895781,12.553425],[-12.895897,12.553364],[-12.896041,12.553176],[-12.895966,12.55307],[-12.896035,12.553007],[-12.896705,12.553019],[-12.89715,12.55275],[-12.897275,12.552606],[-12.897312,12.552449],[-12.897319,12.55198],[-12.897438,12.551848],[-12.897626,12.551754],[-12.898309,12.551541],[-12.898616,12.551378],[-12.898772,12.550896],[-12.899023,12.550846],[-12.899436,12.550915],[-12.899712,12.550896],[-12.899862,12.550827],[-12.900376,12.550727],[-12.900488,12.55067],[-12.900545,12.550576],[-12.900557,12.550326],[-12.900664,12.550313],[-12.900764,12.550414],[-12.900958,12.550332],[-12.901115,12.550038],[-12.901309,12.550063],[-12.901491,12.550151],[-12.90171,12.550144],[-12.901848,12.550019],[-12.901879,12.549881],[-12.902004,12.549737],[-12.902299,12.549624],[-12.9027,12.549649],[-12.903075,12.54985],[-12.903445,12.550201],[-12.904429,12.550608],[-12.905496,12.551181],[-12.905978,12.55125],[-12.907532,12.550975],[-12.908912,12.550914],[-12.909848,12.550536],[-12.91036,12.549946],[-12.910728,12.549612],[-12.910794,12.549333],[-12.910928,12.549032],[-12.911296,12.548543],[-12.91173,12.548353],[-12.912353,12.547807],[-12.912654,12.547596],[-12.912877,12.547306],[-12.91359,12.546649],[-12.914024,12.546026],[-12.914346,12.545779],[-12.917929,12.544923],[-12.91859,12.544705],[-12.919417,12.544547],[-12.920161,12.544472],[-12.920987,12.544299],[-12.921665,12.544057],[-12.9221,12.543804],[-12.923102,12.543514],[-12.923428,12.54355],[-12.923924,12.543677],[-12.924715,12.544039],[-12.925035,12.544232],[-12.925597,12.544408],[-12.925965,12.544637],[-12.926321,12.544776],[-12.927016,12.544848],[-12.927209,12.544698],[-12.927378,12.544365],[-12.927402,12.543949],[-12.927276,12.543659],[-12.927245,12.543459],[-12.927252,12.542861],[-12.928055,12.542318],[-12.928266,12.542324],[-12.929153,12.541466],[-12.929842,12.540941],[-12.930497,12.540338],[-12.930766,12.540357],[-12.932005,12.540748],[-12.93293,12.540877],[-12.933154,12.540851],[-12.933604,12.54062],[-12.933848,12.540582],[-12.934272,12.540633],[-12.934592,12.54062],[-12.934913,12.540331],[-12.93508,12.539927],[-12.935209,12.539779],[-12.935825,12.539413],[-12.936775,12.539388],[-12.936955,12.539439],[-12.937346,12.539676],[-12.937854,12.53976],[-12.938085,12.539696],[-12.938694,12.539105],[-12.938919,12.538797],[-12.93907,12.538666],[-12.93932,12.538526],[-12.941245,12.537744],[-12.942133,12.537338],[-12.949152,12.527822],[-12.949202,12.527697],[-12.949388,12.527598],[-12.949487,12.527449],[-12.949438,12.527114],[-12.949177,12.527014],[-12.948655,12.526977],[-12.948258,12.526691],[-12.948071,12.526455],[-12.948071,12.525896],[-12.947959,12.525809],[-12.947761,12.525822],[-12.947363,12.525946],[-12.946779,12.525921],[-12.946804,12.525387],[-12.94668,12.525213],[-12.946395,12.525002],[-12.945463,12.524704],[-12.944765,12.524238],[-12.944186,12.524023],[-12.943904,12.523774],[-12.943573,12.523393],[-12.943357,12.522996],[-12.943722,12.522979],[-12.943937,12.522896],[-12.944037,12.522433],[-12.943821,12.522267],[-12.943523,12.522267],[-12.943208,12.522333],[-12.942894,12.522234],[-12.94243,12.522317],[-12.942165,12.522184],[-12.942148,12.52187],[-12.942264,12.521704],[-12.942778,12.521489],[-12.942811,12.52124],[-12.942612,12.520561],[-12.942595,12.520379],[-12.94286,12.520015],[-12.942778,12.519866],[-12.942513,12.519634],[-12.942314,12.519269],[-12.942099,12.519004],[-12.941536,12.518888],[-12.941055,12.518474],[-12.940906,12.518093],[-12.940906,12.517828],[-12.941055,12.517563],[-12.941304,12.517315],[-12.941966,12.517083],[-12.942165,12.516918],[-12.942181,12.516686],[-12.942066,12.516321],[-12.942281,12.516123],[-12.942761,12.51546],[-12.943376,12.514713],[-12.943685,12.514576],[-12.94384,12.514301],[-12.943737,12.513888],[-12.94372,12.513492],[-12.943771,12.513097],[-12.943874,12.512736],[-12.943576,12.512738],[-12.94304,12.512592],[-12.94278,12.512186],[-12.942878,12.511975],[-12.943105,12.511699],[-12.943014,12.511188],[-12.941811,12.510672],[-12.941271,12.510758],[-12.941024,12.510708],[-12.940993,12.510355],[-12.941087,12.510154],[-12.941094,12.509625],[-12.940842,12.509235],[-12.940745,12.508935],[-12.940229,12.508024],[-12.939816,12.507749],[-12.939301,12.507774],[-12.940879,12.504169],[-12.941306,12.502828],[-12.941671,12.500634],[-12.9422811,12.497647],[-12.9427691,12.494904],[-12.9428911,12.492831],[-12.9431951,12.490149],[-12.9433781,12.4878329],[-12.9442321,12.480518],[-12.9442921,12.4787499],[-12.9447201,12.4756139],[-12.9449591,12.4756229],[-12.9455521,12.4758189],[-12.9464961,12.4758709],[-12.9470431,12.4759689],[-12.9476701,12.4761789],[-12.9479141,12.4761899],[-12.9481801,12.4760799],[-12.9489781,12.4759799],[-12.9493981,12.4759799],[-12.9500961,12.4758579],[-12.9518581,12.4758469],[-12.9521681,12.4758799],[-12.9525561,12.4757469],[-12.9528001,12.4757469],[-12.9535641,12.4755369],[-12.9543401,12.4755149],[-12.9548721,12.4755589],[-12.9557691,12.4752819],[-12.9563781,12.4752709],[-12.9582951,12.4753819],[-12.9587721,12.4753149],[-12.9596361,12.4753039],[-12.9604001,12.4750159],[-12.9611541,12.4749269],[-12.9631811,12.4749829],[-12.9642561,12.4749609],[-12.9644781,12.4748279],[-12.9646661,12.4745279],[-12.9647101,12.4743289],[-12.9649651,12.473764],[-12.9653971,12.473166],[-12.9656741,12.4729],[-12.9661191,12.47201],[-12.9672581,12.470242],[-12.9677341,12.469776],[-12.9691421,12.468188],[-12.9696801,12.467694],[-12.9703801,12.466941],[-12.9711251,12.466591],[-12.9720491,12.466348],[-12.9743291,12.466221],[-12.9745611,12.466276],[-12.9749421,12.466521],[-12.9750651,12.466834],[-12.9753371,12.467106],[-12.9769021,12.467024],[-12.9774601,12.467038],[-12.9777191,12.467106],[-12.9782221,12.4678],[-12.9785351,12.467923],[-12.9791071,12.467868],[-12.9793931,12.467691],[-12.9798281,12.467596],[-12.9802091,12.467569],[-12.9804951,12.467786],[-12.9808221,12.468236],[-12.9812441,12.468535],[-12.9819651,12.468794],[-12.9822101,12.468821],[-12.9824421,12.468943],[-12.9825911,12.46918],[-12.9832721,12.469866],[-12.9839141,12.469906],[-12.9840491,12.470057],[-12.9841921,12.470334],[-12.9844621,12.470541],[-12.9848191,12.470707],[-12.9853591,12.470691],[-12.9856921,12.470437],[-12.9865731,12.470112],[-12.9866841,12.469946],[-12.9867311,12.469771],[-12.9867631,12.467946],[-12.9868581,12.467867],[-12.9869771,12.46824],[-12.9871921,12.468359],[-12.9875641,12.46866],[-12.9876441,12.46893],[-12.9877711,12.469144],[-12.9883341,12.469477],[-12.9884611,12.469811],[-12.9886041,12.469985],[-12.9891511,12.470247],[-12.9895801,12.470255],[-12.9899921,12.470525],[-12.9902301,12.47116],[-12.9904441,12.471509],[-12.9906031,12.471644],[-12.9908731,12.4717469],[-12.9910551,12.4718739],[-12.9912851,12.471905],[-12.9917301,12.47185],[-12.9920231,12.471953],[-12.9925551,12.472199],[-12.9930791,12.472564],[-12.9936581,12.472746],[-12.9937371,12.473159],[-12.9939601,12.473484],[-12.9941971,12.47354],[-12.9946181,12.473445],[-12.9949591,12.473421],[-12.9952761,12.473572],[-12.9955231,12.473802],[-12.9957921,12.4744519],[-12.9958321,12.4748649],[-12.9959431,12.4753649],[-12.9961181,12.4754519],[-12.9962761,12.4753809],[-12.9966491,12.4753489],[-12.9968321,12.4756029],[-12.9968471,12.4758799],[-12.9967521,12.4766339],[-12.9968631,12.4768559],[-12.9972841,12.4768719],[-12.9974661,12.4770149],[-12.9975541,12.4774429],[-12.9977051,12.4778559],[-12.9981411,12.4783159],[-12.9985521,12.4788959],[-12.9986331,12.4791099],[-12.9985171,12.4797789],[-12.9986511,12.4800649],[-12.9987751,12.480207],[-12.9990521,12.4803949],[-12.9996761,12.480511],[-12.9999091,12.480502],[-13.0002031,12.4803409],[-13.0005951,12.4800109],[-13.0011401,12.4797609],[-13.0014161,12.4797609],[-13.0015861,12.47986],[-13.0020051,12.4802699],[-13.0022011,12.480743],[-13.0023171,12.480877],[-13.0024951,12.480921],[-13.0030491,12.480466],[-13.0032181,12.4804209],[-13.0037801,12.48043],[-13.0042801,12.480734],[-13.0045831,12.480805],[-13.0048691,12.480796],[-13.0051011,12.480689],[-13.0052251,12.480564],[-13.0054751,12.480546],[-13.0058591,12.480743],[-13.0064121,12.480814],[-13.0067601,12.481126],[-13.0068401,12.481278],[-13.0073311,12.481581],[-13.0075451,12.48159],[-13.0082851,12.481224],[-13.0084911,12.481162],[-13.0088921,12.48118],[-13.0091061,12.481314],[-13.0095351,12.481724],[-13.0099271,12.481751],[-13.0100881,12.481688],[-13.0103551,12.481679],[-13.0108911,12.4818669],[-13.0120151,12.4821699],[-13.0125591,12.482241],[-13.0127101,12.482241],[-13.0128981,12.4821519],[-13.0130411,12.481929],[-13.0130761,12.481751],[-13.0131831,12.481537],[-13.0134331,12.481331],[-13.0135761,12.481314],[-13.0137901,12.48134],[-13.0140311,12.48143],[-13.0143881,12.481724],[-13.0148341,12.4822059],[-13.0152441,12.482331],[-13.0156461,12.482331],[-13.0161361,12.4821879],[-13.0164751,12.4821879],[-13.0166181,12.4821429],[-13.0168141,12.4818309],[-13.0169031,12.48176],[-13.0172521,12.481715],[-13.0178851,12.4818489],[-13.0179561,12.482411],[-13.0182151,12.4825],[-13.0182511,12.482634],[-13.0185451,12.482866],[-13.0185631,12.4833919],[-13.0186971,12.4835979],[-13.0189021,12.4836869],[-13.0191431,12.4836869],[-13.0198031,12.4834459],[-13.0199721,12.4834369],[-13.0204901,12.4835619],[-13.0208551,12.4835709],[-13.0209891,12.4835349],[-13.0211771,12.483285],[-13.0215251,12.483],[-13.0217581,12.482905],[-13.0220591,12.48286],[-13.0225861,12.482885],[-13.0237601,12.482257],[-13.0240011,12.4821469],[-13.0242421,12.482122],[-13.0246841,12.482262],[-13.0248751,12.482473],[-13.0249501,12.48286],[-13.0250881,12.483013],[-13.0255161,12.483034],[-13.0258651,12.482851],[-13.0260161,12.482825],[-13.0262091,12.482841],[-13.0263541,12.482912],[-13.0265751,12.4830689],[-13.0266591,12.4833],[-13.0265641,12.4834889],[-13.0265431,12.4837309],[-13.0266591,12.4839929],[-13.0268161,12.4842029],[-13.0270161,12.4843189],[-13.0274051,12.4843189],[-13.0276571,12.4842869],[-13.0278981,12.4841189],[-13.0285911,12.4838989],[-13.0289481,12.4836889],[-13.0297991,12.4834889],[-13.0301351,12.4833109],[-13.0309221,12.4830899],[-13.0317411,12.482996],[-13.0319091,12.48288],[-13.0322141,12.482565],[-13.0325501,12.4821349],[-13.0325811,12.481809],[-13.0327071,12.481589],[-13.0329071,12.481463],[-13.0340621,12.481452],[-13.0344511,12.4814],[-13.0353751,12.481106],[-13.0357111,12.480686],[-13.0358051,12.480371],[-13.0357951,12.480098],[-13.0361521,12.4797509],[-13.0367921,12.4796879],[-13.0372331,12.4797929],[-13.0383571,12.480392],[-13.0391651,12.481011],[-13.0400471,12.481925],[-13.0403211,12.482355],[-13.0406461,12.48266],[-13.0409291,12.4827649],[-13.0417591,12.482534],[-13.0423891,12.482523],[-13.0427151,12.482733],[-13.0430511,12.483038],[-13.0435971,12.4832269],[-13.0440271,12.4832579],[-13.0445001,12.4832369],[-13.0451721,12.4830799],[-13.0456551,12.482912],[-13.0500731,12.482773],[-13.0512841,12.4828139],[-13.0522681,12.482978],[-13.0532121,12.4833469],[-13.0542121,12.4835659],[-13.0549281,12.4836389],[-13.0562811,12.4836529],[-13.0578391,12.4837779],[-13.0589181,12.4840299],[-13.0593371,12.4841939],[-13.0599341,12.4843289],[-13.0613971,12.4848809],[-13.0616951,12.4850749],[-13.0623751,12.4857749],[-13.0627811,12.4863649],[-13.0631971,12.4876519],[-13.0634001,12.4878589],[-13.0636901,12.4879619],[-13.0641981,12.4880089],[-13.0647111,12.4879869],[-13.0655031,12.4881209],[-13.0658761,12.488375],[-13.0660401,12.488838],[-13.0662341,12.489077],[-13.0662491,12.489748],[-13.0661901,12.489972],[-13.0660251,12.490122],[-13.0657721,12.490226],[-13.0657421,12.490644],[-13.0658311,12.490928],[-13.0659961,12.491122],[-13.0662641,12.491197],[-13.0665631,12.491406],[-13.0669211,12.49154],[-13.0671901,12.491779],[-13.0676081,12.492421],[-13.0686231,12.493078],[-13.0687571,12.493347],[-13.0688021,12.49372],[-13.0679961,12.494944],[-13.0674141,12.495571],[-13.0671001,12.496258],[-13.0670851,12.496855],[-13.0672791,12.497736],[-13.0674441,12.49793],[-13.0675931,12.498199],[-13.0676081,12.498975],[-13.0672201,12.499423],[-13.0670111,12.499558],[-13.0666971,12.499632],[-13.066533,12.499961],[-13.066488,12.500334],[-13.066578,12.500737],[-13.067041,12.501125],[-13.067249,12.501573],[-13.067265,12.502021],[-13.06722,12.502424],[-13.066443,12.503365],[-13.065592,12.503873],[-13.065323,12.504216],[-13.065309,12.504783],[-13.065353,12.505321],[-13.065876,12.506082],[-13.065898,12.506521],[-13.06577,12.507332],[-13.06575,12.509103],[-13.065799,12.510746],[-13.065934,12.511893],[-13.065914,12.512132],[-13.065306,12.513897],[-13.065296,12.514256],[-13.065356,12.514576],[-13.065595,12.515184],[-13.065625,12.515393],[-13.065595,12.516191],[-13.065475,12.51656],[-13.065246,12.516959],[-13.064768,12.517697],[-13.064578,12.517877],[-13.064538,12.518335],[-13.064558,12.518585],[-13.064747,12.518874],[-13.065884,12.519572],[-13.066313,12.520121],[-13.066353,12.520779],[-13.066463,12.521138],[-13.066403,12.522684],[-13.066293,12.523152],[-13.066064,12.523362],[-13.065466,12.52422],[-13.065406,12.524469],[-13.065745,12.525017],[-13.066014,12.525167],[-13.066363,12.525287],[-13.066902,12.525785],[-13.067091,12.526244],[-13.067261,12.527072],[-13.06744,12.527461],[-13.067869,12.528179],[-13.068328,12.528737],[-13.068597,12.528937],[-13.069135,12.529027],[-13.069365,12.529017],[-13.069784,12.528907],[-13.070043,12.528907],[-13.070233,12.529017],[-13.070422,12.529226],[-13.070532,12.529505],[-13.0706255,12.5297322],[-13.0706561,12.5299057],[-13.070692,12.5301093],[-13.0707424,12.5306502],[-13.0707124,12.5310257],[-13.0706193,12.5313058],[-13.070253,12.531649],[-13.070033,12.531819],[-13.069794,12.531889],[-13.069266,12.531894],[-13.069193,12.531989],[-13.069172,12.532282],[-13.069246,12.532429],[-13.069372,12.532513],[-13.069544,12.532547],[-13.070691,12.532537],[-13.070821,12.532717],[-13.070891,12.532936],[-13.07123,12.533554],[-13.07129,12.534322],[-13.071419,12.534621],[-13.071399,12.53513],[-13.07123,12.53532],[-13.070502,12.535708],[-13.070312,12.536038],[-13.070422,12.536377],[-13.070592,12.536546],[-13.070811,12.536676],[-13.07106,12.536975],[-13.07116,12.537384],[-13.07113,12.537982],[-13.070821,12.538401],[-13.070203,12.53878],[-13.069335,12.538531],[-13.069106,12.538551],[-13.068876,12.53878],[-13.068517,12.539389],[-13.068178,12.539837],[-13.067919,12.540057],[-13.067819,12.540266],[-13.06772,12.540914],[-13.06751,12.541144],[-13.06738,12.541214],[-13.066782,12.541293],[-13.066573,12.541453],[-13.066373,12.542351],[-13.066393,12.542999],[-13.066233,12.543258],[-13.065854,12.543537],[-13.065256,12.543557],[-13.064718,12.543408],[-13.064269,12.543158],[-13.063431,12.542899],[-13.062883,12.542799],[-13.062344,12.54262],[-13.062105,12.54266],[-13.061965,12.542869],[-13.061925,12.543059],[-13.062084,12.543507],[-13.061945,12.543827],[-13.061795,12.543996],[-13.060988,12.544604],[-13.05999,12.545133],[-13.059272,12.545382],[-13.058006,12.54626],[-13.057746,12.546459],[-13.057457,12.546848],[-13.057178,12.547397],[-13.056849,12.547596],[-13.0563,12.547846],[-13.056061,12.548115],[-13.055862,12.548504],[-13.055921,12.548633],[-13.05635,12.549122],[-13.05656,12.549232],[-13.056769,12.549421],[-13.056889,12.54999],[-13.056709,12.551097],[-13.056749,12.551556],[-13.056889,12.551845],[-13.056998,12.552244],[-13.057028,12.552583],[-13.056969,12.552962],[-13.056819,12.553431],[-13.05633,12.554218],[-13.056121,12.554767],[-13.05622,12.555535],[-13.055961,12.556773],[-13.055961,12.559634],[-13.056304,12.560914],[-13.056433,12.561481],[-13.056433,12.561644],[-13.056278,12.561739],[-13.055849,12.561833],[-13.055213,12.561859],[-13.055144,12.561979],[-13.055187,12.562202],[-13.055213,12.563044],[-13.05535,12.563397],[-13.055591,12.563895],[-13.05572,12.563998],[-13.056038,12.564445],[-13.056424,12.564745],[-13.056588,12.56496],[-13.056613,12.565175],[-13.05657,12.565364],[-13.056459,12.56557],[-13.056287,12.565716],[-13.055737,12.566025],[-13.054801,12.566291],[-13.054062,12.566386],[-13.053753,12.566558],[-13.053366,12.566944],[-13.05322,12.567236],[-13.052601,12.568894],[-13.052404,12.569152],[-13.052206,12.569298],[-13.052,12.569393],[-13.051691,12.569453],[-13.050712,12.569511],[-13.050407,12.569714],[-13.050325,12.57002],[-13.050305,12.570488],[-13.05006,12.571405],[-13.049511,12.57171],[-13.04892,12.572178],[-13.048472,12.572626],[-13.048065,12.573278],[-13.047739,12.573665],[-13.047312,12.574377],[-13.04666,12.575294],[-13.046497,12.575864],[-13.046415,12.576292],[-13.046415,12.577249],[-13.046477,12.577697],[-13.046651,12.578125],[-13.046651,12.57831],[-13.046542,12.578932],[-13.045974,12.580299],[-13.045961,12.580709],[-13.046268,12.582302],[-13.0462,12.583717],[-13.046234,12.584626],[-13.0462,12.58505],[-13.045961,12.585542],[-13.045769,12.586321],[-13.045762,12.587196],[-13.045803,12.587695],[-13.04592,12.588461],[-13.045995,12.588693],[-13.046453,12.58935],[-13.046624,12.589842],[-13.046877,12.590368],[-13.047267,12.590922],[-13.047478,12.591476],[-13.047738,12.591927],[-13.048073,12.592166],[-13.048271,12.592385],[-13.048394,12.592644],[-13.048429,12.593123],[-13.048501,12.593262],[-13.048824,12.593593],[-13.048935,12.593778],[-13.04897,12.593958],[-13.048939,12.594128],[-13.048678,12.594454],[-13.048205,12.594793],[-13.04782,12.594917],[-13.047784,12.595297],[-13.047319,12.595956],[-13.047156,12.59627],[-13.047083,12.596608],[-13.047282,12.59723],[-13.04727,12.598039],[-13.047125,12.598431],[-13.04692,12.59877],[-13.046851,12.599207],[-13.046819,12.599862],[-13.046969,12.600925],[-13.04698,12.601376],[-13.046947,12.601763],[-13.046505,12.602716],[-13.046481,12.603036],[-13.046547,12.60338],[-13.046831,12.603827],[-13.046861,12.604038],[-13.047018,12.604243],[-13.047229,12.604292],[-13.047417,12.604268],[-13.04761,12.604159],[-13.04825,12.603525],[-13.0486,12.603386],[-13.048872,12.603332],[-13.049355,12.603326],[-13.049627,12.603519],[-13.04985,12.603785],[-13.049917,12.60408],[-13.049923,12.605548],[-13.049977,12.605717],[-13.050194,12.606061],[-13.050412,12.606321],[-13.050557,12.606677],[-13.050563,12.606961],[-13.050448,12.607239],[-13.050225,12.607571],[-13.04981,12.608096],[-13.049609,12.60823],[-13.049559,12.608464],[-13.04955,12.609553],[-13.049643,12.609905],[-13.050195,12.610357],[-13.050873,12.610734],[-13.051594,12.610901],[-13.05192,12.611027],[-13.052172,12.611245],[-13.052423,12.611613],[-13.05285,12.612099],[-13.053453,12.612409],[-13.053729,12.61271],[-13.053905,12.613003],[-13.053972,12.613322],[-13.054114,12.613648],[-13.054207,12.614192],[-13.05455,12.614745],[-13.054826,12.61508],[-13.054977,12.615357],[-13.055069,12.615641],[-13.055061,12.615892],[-13.054927,12.616093],[-13.054441,12.616269],[-13.053771,12.616378],[-13.052808,12.616244],[-13.052004,12.616454],[-13.051736,12.616621],[-13.051518,12.616881],[-13.050798,12.61786],[-13.050597,12.618221],[-13.050547,12.618924],[-13.050614,12.61941],[-13.050723,12.619619],[-13.051334,12.619879],[-13.051502,12.620088],[-13.051585,12.620775],[-13.051652,12.621461],[-13.051635,12.622081],[-13.051393,12.623086],[-13.051116,12.623856],[-13.051088,12.624236],[-13.051322,12.625465],[-13.052047,12.626275],[-13.052665,12.626744],[-13.05297,12.62695],[-13.053312,12.627071],[-13.053539,12.627234],[-13.054718,12.627824],[-13.055009,12.627867],[-13.056068,12.627881],[-13.057361,12.627668],[-13.058093,12.627718],[-13.059201,12.628854],[-13.059485,12.629053],[-13.060075,12.629593],[-13.060487,12.629849],[-13.060579,12.630055],[-13.060828,12.63041],[-13.06129,12.631035],[-13.061808,12.631618],[-13.062043,12.631987],[-13.062291,12.632271],[-13.062938,12.632868],[-13.063819,12.633607],[-13.064174,12.633792],[-13.065048,12.634374],[-13.065417,12.634559],[-13.065986,12.634723],[-13.066554,12.634971],[-13.0671721,12.635461],[-13.067378,12.636001],[-13.0674071,12.636641],[-13.067343,12.637095],[-13.067222,12.637458],[-13.065957,12.638985],[-13.065729,12.639406],[-13.065382,12.639771],[-13.064886,12.640062],[-13.064614,12.640155],[-13.064474,12.640352],[-13.064034,12.641251],[-13.063809,12.641373],[-13.06364,12.641401],[-13.063472,12.641523],[-13.063153,12.641972],[-13.062919,12.642516],[-13.062956,12.643705],[-13.063106,12.643921],[-13.063378,12.644052],[-13.064689,12.644033],[-13.065392,12.643977],[-13.065982,12.643696],[-13.066141,12.6435051],[-13.06645,12.643134],[-13.066843,12.642871],[-13.067396,12.642825],[-13.068464,12.642609],[-13.068885,12.642478],[-13.069354,12.642431],[-13.070141,12.642431],[-13.070478,12.642497],[-13.070937,12.64274],[-13.071236,12.642834],[-13.07177,12.64364],[-13.072145,12.643967],[-13.072707,12.644361],[-13.073597,12.644782],[-13.074027,12.644857],[-13.074355,12.645045],[-13.074777,12.645204],[-13.075161,12.645232],[-13.075498,12.644951],[-13.076154,12.643752],[-13.076351,12.642918],[-13.07651,12.642591],[-13.076556,12.642347],[-13.076837,12.642038],[-13.077203,12.641851],[-13.078046,12.641616],[-13.078355,12.641354],[-13.078392,12.641157],[-13.078524,12.640989],[-13.078683,12.640595],[-13.078729,12.640371],[-13.0787314,12.6402613],[-13.078739,12.639893],[-13.078589,12.639172],[-13.07857,12.638806],[-13.078495,12.638563],[-13.078149,12.638095],[-13.077811,12.637467],[-13.077755,12.637149],[-13.077774,12.636914],[-13.0778961,12.636615],[-13.07828,12.636156],[-13.078664,12.635884],[-13.078945,12.635819],[-13.079891,12.635828],[-13.080387,12.635987],[-13.08094,12.635997],[-13.082523,12.635875],[-13.0834881,12.635481],[-13.0839,12.635013],[-13.084246,12.634835],[-13.084752,12.63461],[-13.085361,12.634545],[-13.085707,12.634404],[-13.086803,12.633739],[-13.087431,12.63328],[-13.088077,12.633074],[-13.088555,12.633009],[-13.088939,12.633027],[-13.090597,12.633767],[-13.090981,12.633814],[-13.091318,12.633692],[-13.091514,12.633299],[-13.091552,12.632999],[-13.091496,12.631829],[-13.091449,12.631622],[-13.091215,12.631135],[-13.091168,12.630854],[-13.091168,12.630573],[-13.09129,12.630011],[-13.091271,12.629337],[-13.091393,12.629037],[-13.091796,12.628494],[-13.092058,12.62826],[-13.092714,12.627838],[-13.093285,12.627108],[-13.093856,12.626546],[-13.0946681,12.6262953],[-13.09498,12.626199],[-13.095242,12.625993],[-13.0955443,12.6259181],[-13.095617,12.6259],[-13.095945,12.625871],[-13.096263,12.625871],[-13.096619,12.626003],[-13.096816,12.626293],[-13.096853,12.626602],[-13.096788,12.627192],[-13.096619,12.627464],[-13.096526,12.62782],[-13.096479,12.628241],[-13.096535,12.62855],[-13.096619,12.628813],[-13.097077,12.629699],[-13.09752,12.630106],[-13.097871,12.630148],[-13.098257,12.629917],[-13.098531,12.629678],[-13.098728,12.629291],[-13.099009,12.62894],[-13.099157,12.628645],[-13.09981,12.628139],[-13.100737,12.627598],[-13.102191,12.627634],[-13.102521,12.627739],[-13.104242,12.628104],[-13.104572,12.628266],[-13.104889,12.628484],[-13.105191,12.628891],[-13.105528,12.629495],[-13.105521,12.63024],[-13.105458,12.630893],[-13.105621,12.631782],[-13.106001,12.632288],[-13.106443,12.632778],[-13.106649,12.63322],[-13.107171,12.633536],[-13.107692,12.633963],[-13.107977,12.634327],[-13.108419,12.634706],[-13.108703,12.635148],[-13.110711,12.637171],[-13.111232,12.6373299],[-13.111975,12.637361],[-13.112797,12.6372819],[-13.113113,12.636966],[-13.1135561,12.636681],[-13.1139671,12.636555],[-13.114536,12.636539],[-13.1152781,12.636761],[-13.1158001,12.63684],[-13.117934,12.636887],[-13.1185351,12.636808],[-13.11972,12.63597],[-13.120241,12.635654],[-13.120621,12.635559],[-13.121158,12.635891],[-13.121316,12.636334],[-13.121427,12.636934],[-13.12149,12.637646],[-13.121459,12.638246],[-13.121237,12.638784],[-13.121079,12.639384],[-13.120779,12.640048],[-13.1207556,12.6402724],[-13.120731,12.640506],[-13.1207887,12.6412115],[-13.120811,12.641486],[-13.121,12.641834],[-13.121269,12.64215],[-13.121664,12.642529],[-13.1220121,12.642703],[-13.122312,12.642593],[-13.122707,12.642356],[-13.123086,12.641834],[-13.12345,12.641534],[-13.123972,12.641328],[-13.125126,12.640775],[-13.125726,12.640696],[-13.1262717,12.640265],[-13.126706,12.639922],[-13.128002,12.638736],[-13.128508,12.638562],[-13.128887,12.638531],[-13.129298,12.638547],[-13.129899,12.638768],[-13.130799,12.639732],[-13.131211,12.640064],[-13.1315991,12.6403301],[-13.132064,12.640649],[-13.133391,12.641344],[-13.133913,12.641739],[-13.1342524,12.6421574],[-13.134561,12.642498],[-13.1347026,12.6427671],[-13.134893,12.642956],[-13.135841,12.643968],[-13.136316,12.644568],[-13.1366,12.645027],[-13.136916,12.645374],[-13.137359,12.64558],[-13.137691,12.645612],[-13.138054,12.64539],[-13.138291,12.645169],[-13.138386,12.644853],[-13.138386,12.644442],[-13.138544,12.643399],[-13.138481,12.642814],[-13.1384811,12.6420552],[-13.138481,12.641787],[-13.1385201,12.6407799],[-13.1385388,12.6402975],[-13.13856,12.639748],[-13.138528,12.638942],[-13.138434,12.638389],[-13.138339,12.637203],[-13.138181,12.636334],[-13.138118,12.634532],[-13.138165,12.634058],[-13.138339,12.633742],[-13.138797,12.63352],[-13.139224,12.633505],[-13.139682,12.633805],[-13.140425,12.634785],[-13.141373,12.635638],[-13.141816,12.636097],[-13.142369,12.636523],[-13.142685,12.63695],[-13.143159,12.63733],[-13.143792,12.638215],[-13.1439699,12.6384032],[-13.144598,12.639068],[-13.145657,12.639858],[-13.1466186,12.640334],[-13.147095,12.64057],[-13.148091,12.64136],[-13.148596,12.641581],[-13.149165,12.641629],[-13.15005,12.641565],[-13.151236,12.641392],[-13.1512905,12.6413933],[-13.151805,12.641407],[-13.153796,12.641739],[-13.154666,12.641723],[-13.155029,12.641676],[-13.15544,12.64155],[-13.156009,12.641771],[-13.156357,12.642182],[-13.156815,12.642609],[-13.157542,12.642988],[-13.158143,12.643399],[-13.158901,12.643478],[-13.159534,12.643162],[-13.159644,12.642688],[-13.159565,12.641565],[-13.1591757,12.6403555],[-13.158649,12.63872],[-13.158601,12.637946],[-13.158617,12.63714],[-13.158743,12.636381],[-13.159091,12.635559],[-13.159597,12.635212],[-13.159961,12.635196],[-13.161257,12.635781],[-13.161873,12.636286],[-13.164465,12.638104],[-13.164908,12.638183],[-13.165398,12.638183],[-13.165761,12.638057],[-13.165966,12.637788],[-13.165982,12.637377],[-13.165919,12.636381],[-13.165761,12.635844],[-13.165382,12.634121],[-13.165366,12.633315],[-13.165445,12.632778],[-13.165777,12.632572],[-13.166172,12.632556],[-13.166741,12.632651],[-13.167942,12.633536],[-13.168195,12.634105],[-13.168243,12.635528],[-13.168827,12.637187],[-13.169207,12.637899],[-13.169665,12.63861],[-13.170345,12.639305],[-13.171783,12.639558],[-13.172478,12.639637],[-13.173174,12.639605],[-13.173506,12.639274],[-13.17349,12.638863],[-13.173126,12.637946],[-13.172984,12.636792],[-13.172968,12.636207],[-13.173221,12.635638],[-13.173458,12.635275],[-13.173822,12.635259],[-13.174343,12.635385],[-13.174928,12.635243],[-13.17526,12.634911],[-13.175892,12.63371],[-13.176366,12.63254],[-13.176714,12.631908],[-13.177441,12.63017],[-13.177678,12.629695],[-13.177789,12.629063],[-13.178453,12.627325],[-13.178722,12.627072],[-13.179054,12.627009],[-13.179575,12.627167],[-13.18035,12.627688],[-13.180998,12.628399],[-13.181409,12.629016],[-13.182104,12.630581],[-13.182499,12.631355],[-13.182752,12.632003],[-13.183163,12.632667],[-13.183653,12.633204],[-13.18389,12.633615],[-13.184743,12.633931],[-13.185186,12.633963],[-13.185518,12.634074],[-13.186814,12.635401],[-13.187225,12.635749],[-13.18781,12.636745],[-13.188426,12.637567],[-13.18879,12.637899],[-13.189311,12.638151],[-13.190022,12.638578],[-13.190275,12.638847],[-13.190655,12.6391],[-13.191208,12.639163],[-13.192409,12.639179],[-13.193057,12.639289],[-13.196139,12.640427],[-13.196677,12.640728],[-13.197925,12.641723],[-13.198415,12.642213],[-13.198699,12.642577],[-13.1987823,12.642781],[-13.198873,12.643004],[-13.199189,12.643509],[-13.199616,12.643889],[-13.200154,12.644078],[-13.201181,12.644331],[-13.202114,12.644331],[-13.202619,12.644221],[-13.20303,12.644078],[-13.20333,12.643936],[-13.203568,12.643731],[-13.203836,12.64362],[-13.2042,12.64362],[-13.204674,12.643683],[-13.205559,12.644063],[-13.205923,12.644158],[-13.206413,12.644837],[-13.206413,12.645137],[-13.206207,12.645706],[-13.206033,12.645991],[-13.205606,12.646544],[-13.205275,12.646892],[-13.204958,12.647334],[-13.204626,12.648267],[-13.20431,12.648804],[-13.204105,12.64931],[-13.20401,12.649974],[-13.204089,12.65146],[-13.2042,12.652044],[-13.20439,12.652519],[-13.204753,12.65304],[-13.205227,12.653372],[-13.205749,12.653641],[-13.207883,12.654162],[-13.208941,12.654194],[-13.209495,12.654052],[-13.210332,12.653404],[-13.211068,12.652683],[-13.211299,12.652345],[-13.211833,12.651732],[-13.212046,12.650869],[-13.21233,12.650603],[-13.212908,12.6503],[-13.213095,12.650274],[-13.213539,12.650389],[-13.214215,12.650451],[-13.215122,12.650816],[-13.215913,12.651527],[-13.216207,12.651616],[-13.217273,12.651581],[-13.217807,12.651509],[-13.218056,12.651394],[-13.218607,12.65126],[-13.218847,12.651065],[-13.219434,12.650407],[-13.219665,12.650211],[-13.219798,12.649927],[-13.219852,12.64958],[-13.219834,12.649242],[-13.219683,12.648691],[-13.219665,12.648229],[-13.219798,12.6479],[-13.219994,12.647615],[-13.22027,12.647358],[-13.220385,12.647109],[-13.220758,12.646549],[-13.221034,12.64598],[-13.22131,12.645597],[-13.22158,12.645332],[-13.221973,12.644745],[-13.22214,12.644558],[-13.222567,12.644285],[-13.223,12.643931],[-13.223547,12.643585],[-13.224273,12.643251],[-13.224607,12.643178],[-13.225987,12.643058],[-13.226487,12.642805],[-13.227014,12.642204],[-13.22721,12.641768],[-13.2274042,12.6412379],[-13.2275489,12.641053],[-13.2277323,12.6407858],[-13.2278461,12.6406217],[-13.2280281,12.6403599],[-13.2282678,12.6402628],[-13.228858,12.640274],[-13.229261,12.640487],[-13.229759,12.641234],[-13.230316,12.641756],[-13.231146,12.642313],[-13.2318849,12.6429129],[-13.232343,12.643285],[-13.233185,12.643889],[-13.233481,12.644162],[-13.234024,12.644986],[-13.234435,12.645476],[-13.234783,12.645808],[-13.235873,12.646377],[-13.237249,12.647515],[-13.237596,12.647926],[-13.237707,12.648226],[-13.237975,12.648511],[-13.23813,12.648785],[-13.238225,12.64925],[-13.238345,12.64956],[-13.238655,12.65008],[-13.238976,12.650405],[-13.239275,12.650555],[-13.239851,12.6505],[-13.240455,12.65019],[-13.240666,12.64996],[-13.241038,12.649158],[-13.241278,12.648813],[-13.241633,12.648531],[-13.242124,12.648239],[-13.243721,12.647591],[-13.244453,12.647226],[-13.245246,12.646902],[-13.246061,12.646609],[-13.246489,12.646557],[-13.246896,12.646609],[-13.247314,12.646745],[-13.248202,12.647163],[-13.248766,12.647581],[-13.250113,12.648374],[-13.250917,12.64898],[-13.251836,12.650035],[-13.252634,12.650736],[-13.253229,12.65112],[-13.25402,12.651527],[-13.254482,12.651637],[-13.255156,12.651676],[-13.2554544,12.6519239],[-13.2558424,12.6521284],[-13.2561747,12.6523083],[-13.2564616,12.6524126],[-13.2566832,12.6525063],[-13.2570565,12.6526606],[-13.2575691,12.6527277],[-13.2581441,12.6526553],[-13.2585669,12.6524713],[-13.2589858,12.652316],[-13.2596,12.6521305],[-13.2602191,12.6520578],[-13.2607575,12.651989],[-13.2615012,12.6519374],[-13.2622588,12.6518067],[-13.2628323,12.6517698],[-13.2633144,12.6517228],[-13.2636984,12.6515801],[-13.2646555,12.6513669],[-13.2655622,12.6511277],[-13.2664271,12.650854],[-13.2668892,12.6506185],[-13.2672465,12.650409],[-13.267437,12.650219],[-13.2678654,12.6500232],[-13.2684121,12.6497886],[-13.2688472,12.6497439],[-13.2691265,12.649773],[-13.2693816,12.6499186],[-13.2695628,12.6501149],[-13.269881,12.650712],[-13.2699323,12.650846],[-13.27004,12.6510567],[-13.2701083,12.6513547],[-13.2701969,12.6516495],[-13.2702506,12.6518589],[-13.2703743,12.652232],[-13.2704681,12.6525377],[-13.2705134,12.6527225],[-13.270613,12.65294],[-13.270742,12.653861],[-13.271048,12.654597],[-13.271275,12.654715],[-13.2714686,12.6547523],[-13.271761,12.654809],[-13.272787,12.655318],[-13.273288,12.655388],[-13.2737836,12.6553522],[-13.274087,12.655341],[-13.274682,12.655169],[-13.275434,12.654605],[-13.275591,12.654425],[-13.275935,12.654213],[-13.276061,12.654057],[-13.276954,12.653493],[-13.277188,12.653493],[-13.277588,12.65361],[-13.278074,12.654213],[-13.278163,12.654745],[-13.278171,12.655787],[-13.278212,12.655952],[-13.278348,12.656112],[-13.2783702,12.6561214],[-13.278565,12.656205],[-13.278863,12.656193],[-13.279406,12.655855],[-13.279695,12.655811],[-13.280102,12.655923],[-13.280769,12.656265],[-13.281416,12.656374],[-13.281859,12.656277],[-13.282209,12.656076],[-13.282558,12.655795],[-13.28323,12.655545],[-13.284573,12.655252],[-13.284832,12.655143],[-13.285083,12.655157],[-13.285278,12.655313],[-13.285476,12.655274],[-13.285519,12.655132],[-13.285445,12.655029],[-13.285423,12.65493],[-13.285455,12.654867],[-13.286114,12.654342],[-13.286581,12.654243],[-13.286709,12.653928],[-13.286691,12.653549],[-13.28684,12.653344],[-13.287063,12.653177],[-13.288188,12.653086],[-13.28836,12.653151],[-13.288526,12.653071],[-13.2889934,12.653219],[-13.289034,12.653232],[-13.289281,12.653146],[-13.289643,12.652945],[-13.290006,12.652527],[-13.290006,12.652341],[-13.28984,12.652018],[-13.289681,12.651429],[-13.2890833,12.6508587],[-13.289074,12.65085],[-13.288868,12.650443],[-13.288845,12.649819],[-13.288782,12.649647],[-13.287774,12.648805],[-13.287309,12.648318],[-13.286822,12.647894],[-13.2866738,12.6477263],[-13.286645,12.647694],[-13.285562,12.646061],[-13.285373,12.645574],[-13.285339,12.644909],[-13.285362,12.644399],[-13.285474,12.6442947],[-13.285608,12.64417],[-13.28598,12.644153],[-13.28619,12.6442159],[-13.2862194,12.6444837],[-13.2862383,12.644631],[-13.2862486,12.6446923],[-13.286252,12.6447513],[-13.2862665,12.6448626],[-13.2862788,12.6449347],[-13.2862883,12.6449704],[-13.2863102,12.6450635],[-13.286337,12.6451727],[-13.2863807,12.6452939],[-13.2864022,12.6453538],[-13.2864209,12.645402],[-13.2864422,12.6454598],[-13.2864847,12.6455482],[-13.2865231,12.6456222],[-13.2865575,12.6456716],[-13.2865821,12.6457087],[-13.2866134,12.6457349],[-13.2866593,12.6457753],[-13.2867264,12.6458299],[-13.28676,12.6458474],[-13.2868461,12.6458889],[-13.2869312,12.6459293],[-13.287005,12.6459631],[-13.2870755,12.645997],[-13.2871393,12.6460275],[-13.2872606,12.6460783],[-13.2873138,12.6460985],[-13.2873631,12.6461192],[-13.2874268,12.6461312],[-13.2875018,12.6461487],[-13.2875661,12.6461633],[-13.2876115,12.6461771],[-13.2876607,12.6461771],[-13.2877077,12.6461749],[-13.2877323,12.6461771],[-13.2877865,12.646174],[-13.2878296,12.6461716],[-13.2879029,12.6461599],[-13.287974,12.6461317],[-13.2880199,12.646099],[-13.288068,12.6460586],[-13.2881474,12.6460029],[-13.2882056,12.6459669],[-13.2882425,12.6459352],[-13.2882804,12.6459106],[-13.288313,12.6458959],[-13.2883947,12.6458479],[-13.2884932,12.6457965],[-13.2885905,12.6457474],[-13.2886565,12.6457223],[-13.288708,12.6457114],[-13.2887751,12.6456983],[-13.28884,12.6456852],[-13.2890076,12.6456567],[-13.2891779,12.6456219],[-13.289292,12.6455968],[-13.2894487,12.6455596],[-13.2895807,12.6455312],[-13.2896725,12.6455127],[-13.2899052,12.6454382],[-13.2900216,12.6454199],[-13.2901032,12.6454112],[-13.2902051,12.6454002],[-13.2903528,12.6453839],[-13.2905407,12.6453463],[-13.2905908,12.6453391],[-13.2906541,12.6453298],[-13.2907712,12.6453205],[-13.2909437,12.6452974],[-13.2910133,12.6452958],[-13.291154,12.6452964],[-13.2912507,12.6453066],[-13.2913773,12.6453113],[-13.2914944,12.6453082],[-13.2915861,12.6453066],[-13.2916562,12.6453124],[-13.291776,12.6453221],[-13.2918947,12.645336],[-13.2920419,12.6453545],[-13.2921669,12.6453622],[-13.2922828,12.6453771],[-13.2923979,12.6453869],[-13.2925118,12.6453869],[-13.2926827,12.6453916],[-13.2928377,12.6453833],[-13.2929422,12.6453699],[-13.2930562,12.6453576],[-13.2931796,12.6453452],[-13.2933315,12.6453221],[-13.2935419,12.6453005],[-13.2937777,12.6452603],[-13.2938901,12.6452402],[-13.2940562,12.6452016],[-13.294167,12.6451769],[-13.2942318,12.64518],[-13.2942936,12.6451816],[-13.294417,12.6451754],[-13.2946531,12.645164],[-13.294792,12.645163],[-13.2952539,12.6452356],[-13.2954614,12.6452763],[-13.2955364,12.6452843],[-13.2956527,12.6452951],[-13.2957492,12.6453043],[-13.2958164,12.6452974],[-13.295947,12.6452889],[-13.2960301,12.6452812],[-13.2960487,12.6452798],[-13.2962008,12.6452923],[-13.2963874,12.6453084],[-13.2965541,12.6453215],[-13.2967052,12.6453335],[-13.2969278,12.6453499],[-13.2972109,12.6453619],[-13.2974862,12.6453783],[-13.2977636,12.6453979],[-13.2980221,12.6454154],[-13.2982936,12.6454412],[-13.2984439,12.6454558],[-13.2985883,12.6454711],[-13.2987102,12.6454831],[-13.2988658,12.645506],[-13.2990042,12.6455247],[-13.2991567,12.6455737],[-13.2992831,12.6456108],[-13.2994185,12.6456589],[-13.2995718,12.6457189],[-13.3000149,12.6459143],[-13.3002252,12.645994],[-13.3005923,12.6461201],[-13.3006851,12.6461523],[-13.3007544,12.6461665],[-13.3008529,12.6461851],[-13.3009379,12.6461862],[-13.3010633,12.6461971],[-13.301117,12.6462069],[-13.3012535,12.6462211],[-13.301324,12.6462298],[-13.3014352,12.646246],[-13.3014996,12.6462484],[-13.3015891,12.6462506],[-13.3016585,12.6462549],[-13.3017346,12.6462582],[-13.3018431,12.6462517],[-13.3019349,12.6462429],[-13.3019852,12.6462397],[-13.3021038,12.6462266],[-13.3021989,12.6462178],[-13.3022672,12.64622],[-13.3023594,12.6462207],[-13.3025055,12.6462124],[-13.3025905,12.6462004],[-13.3027185,12.6461902],[-13.3027931,12.6461665],[-13.3028982,12.6461305],[-13.3029408,12.6461218],[-13.3030359,12.6460977],[-13.3031108,12.6460748],[-13.3031768,12.6460399],[-13.3032855,12.6459836],[-13.3033615,12.6459438],[-13.3034443,12.6459012],[-13.3034913,12.6458641],[-13.3035819,12.6457942],[-13.3036859,12.645708],[-13.3038191,12.6455977],[-13.3038739,12.6455366],[-13.3039231,12.6454831],[-13.3039962,12.6454135],[-13.3040473,12.6453695],[-13.30411,12.6453106],[-13.3042062,12.6452189],[-13.3042438,12.6451643],[-13.3043136,12.6450857],[-13.3044222,12.6449896],[-13.3044882,12.6449252],[-13.3045543,12.6448622],[-13.3046202,12.6447975],[-13.3046851,12.6447472],[-13.3047388,12.6447068],[-13.3047735,12.6446774],[-13.3048429,12.6446479],[-13.3049212,12.6446053],[-13.3050488,12.6445551],[-13.3051324,12.6445183],[-13.3051841,12.644506],[-13.3052927,12.6444819],[-13.3054135,12.6444536],[-13.3055597,12.6444379],[-13.3057055,12.6444208],[-13.3057727,12.6444208],[-13.3059002,12.6444263],[-13.3060479,12.6444252],[-13.3061985,12.6444331],[-13.306303,12.6444339],[-13.3064037,12.6444415],[-13.30666,12.6444634],[-13.3069106,12.6444918],[-13.3072407,12.6445234],[-13.3072809,12.6445322],[-13.3073794,12.6445562],[-13.30746,12.6445715],[-13.3074905,12.6445827],[-13.3075707,12.6446228],[-13.3077285,12.6447156],[-13.3079959,12.6448748],[-13.3080608,12.6449328],[-13.3081914,12.6450477],[-13.3082141,12.6450704],[-13.3082577,12.6451075],[-13.308326,12.6451654],[-13.3084121,12.6452516],[-13.3084681,12.645339],[-13.3085127,12.6454082],[-13.3085945,12.6455409],[-13.3086538,12.6456392],[-13.3087145,12.6457364],[-13.3087646,12.6458139],[-13.3088205,12.6458881],[-13.3088687,12.6459514],[-13.3088962,12.6459903],[-13.3090074,12.6461174],[-13.3091405,12.6462462],[-13.3091719,12.6462801],[-13.3092077,12.646315],[-13.3092771,12.6463816],[-13.3093073,12.6464111],[-13.3093475,12.6464438],[-13.3093789,12.6464689],[-13.3094253,12.6464972],[-13.3094829,12.6465279],[-13.3095389,12.6465595],[-13.3096217,12.6465683],[-13.3097268,12.6465836],[-13.3098502,12.6465706],[-13.3099573,12.6465595],[-13.3100871,12.6465486],[-13.3101632,12.6465181],[-13.3103445,12.6464307],[-13.3105876,12.6463184],[-13.31066,12.6462648],[-13.310801,12.6461556],[-13.3109752,12.6460221],[-13.3110953,12.6459222],[-13.3112187,12.6458111],[-13.311389,12.645639],[-13.3115953,12.6454868],[-13.3117947,12.6452985],[-13.3122221,12.6449337],[-13.3124719,12.6447179],[-13.312753,12.644451],[-13.3134098,12.6439774],[-13.3135727,12.6438767],[-13.3137251,12.6437699],[-13.3137823,12.6437328],[-13.3138815,12.6436714],[-13.3140138,12.6436191],[-13.3141365,12.6435569],[-13.3143291,12.6434793],[-13.314415,12.6434303],[-13.3145484,12.6433832],[-13.3146682,12.6433129],[-13.3147946,12.643274],[-13.3149199,12.6432478],[-13.3151257,12.6432172],[-13.3154082,12.6431728],[-13.3155215,12.6431363],[-13.3157536,12.643051],[-13.3159493,12.6429902],[-13.3160835,12.642929],[-13.3163284,12.6428432],[-13.3164661,12.6427205],[-13.316563,12.6426896],[-13.316655,12.6426348],[-13.3167566,12.6425737],[-13.3168361,12.6425191],[-13.3169379,12.6424547],[-13.3170934,12.6423466],[-13.317202,12.6422811],[-13.3172915,12.6422188],[-13.3173933,12.642149],[-13.3174917,12.6420813],[-13.3176137,12.6420016],[-13.3177055,12.6419601],[-13.3177994,12.641912],[-13.3178934,12.6418684],[-13.3179852,12.6418203],[-13.3180611,12.6418044],[-13.3185122,12.6417057],[-13.3186073,12.6417013],[-13.3188781,12.6416992],[-13.3190794,12.6417021],[-13.3193827,12.6417243],[-13.3196814,12.641757],[-13.3197542,12.6417647],[-13.319809,12.6417657],[-13.3199228,12.6417882],[-13.3200339,12.6418018],[-13.3200898,12.6418105],[-13.3202442,12.64184],[-13.3203024,12.6418564],[-13.3204087,12.6418848],[-13.3205463,12.641923],[-13.320637,12.6419492],[-13.3207802,12.6419852],[-13.320873,12.642031],[-13.3209819,12.6420885],[-13.3212557,12.6422276],[-13.3213419,12.6422636],[-13.3215668,12.6423651],[-13.3219559,12.6425407],[-13.3220356,12.6425704],[-13.3220982,12.6425999],[-13.3222213,12.642649],[-13.3223477,12.6427069],[-13.3225145,12.6427756],[-13.3226308,12.6428411],[-13.3227651,12.6429151],[-13.322821,12.6429438],[-13.3228904,12.6429853],[-13.3229911,12.6430322],[-13.3231422,12.6431195],[-13.3235002,12.643315],[-13.323649,12.6433936],[-13.3241738,12.6436793],[-13.3242096,12.6436971],[-13.3242376,12.6437135],[-13.324298,12.6437429],[-13.3243864,12.6437921],[-13.3245329,12.6438729],[-13.3246973,12.6439623],[-13.3247511,12.6439897],[-13.3248015,12.6440202],[-13.3249044,12.6440781],[-13.3251109,12.6441928],[-13.3251674,12.6442113],[-13.3252177,12.6442266],[-13.325315,12.6442572],[-13.3254504,12.6442986],[-13.3254885,12.6443041],[-13.3255437,12.6443051],[-13.3255746,12.6443063],[-13.3256429,12.6443106],[-13.3257055,12.6443161],[-13.3257738,12.6443074],[-13.3258834,12.6442943],[-13.3260434,12.644267],[-13.3262144,12.6442192],[-13.3263724,12.6441785],[-13.3265347,12.6441401],[-13.3266194,12.6441225],[-13.3268304,12.6440787],[-13.3268983,12.6440672],[-13.3269887,12.644057],[-13.3270715,12.6440418],[-13.3272147,12.6440308],[-13.3274407,12.6439959],[-13.3276127,12.6439833],[-13.3277048,12.6439828],[-13.3278032,12.6439762],[-13.327933,12.6439762],[-13.3281031,12.6439675],[-13.3283202,12.6439391],[-13.3285641,12.6439042],[-13.3286683,12.6438923],[-13.3287342,12.6438889],[-13.3288214,12.6438693],[-13.3289109,12.6438693],[-13.3289714,12.6438649],[-13.3290452,12.6438649],[-13.3291481,12.6438562],[-13.3293294,12.6438321],[-13.3295465,12.6438038],[-13.3298473,12.6437793],[-13.3301499,12.6437831],[-13.3302424,12.6437775],[-13.3304617,12.6437841],[-13.3306117,12.6438103],[-13.3307306,12.6438547],[-13.3309182,12.6439151],[-13.3311644,12.6440241],[-13.3313815,12.6441553],[-13.3315654,12.6443352],[-13.3317611,12.64466],[-13.3318276,12.6448083],[-13.3318909,12.6449441],[-13.33192,12.645037],[-13.3319795,12.6452189],[-13.3320256,12.6454579],[-13.3320491,12.6456111],[-13.3320681,12.6457161],[-13.3320776,12.6458087],[-13.3321029,12.6459848],[-13.3321016,12.6460514],[-13.3321093,12.646275],[-13.3321124,12.6465035],[-13.332155,12.646992],[-13.3322028,12.6478326],[-13.332254,12.648365],[-13.332329,12.649342],[-13.332254,12.649862],[-13.332155,12.650109],[-13.331994,12.650344],[-13.331401,12.650629],[-13.331141,12.651012],[-13.3309511,12.6513644],[-13.330692,12.6516313],[-13.330423,12.6519059],[-13.3301843,12.6520917],[-13.3298599,12.6522877],[-13.3294498,12.6525483],[-13.3292419,12.6526197],[-13.3292132,12.6526644],[-13.3291546,12.6527539],[-13.3290439,12.6529052],[-13.3289521,12.6530148],[-13.32884,12.653152],[-13.3287131,12.6533962],[-13.3286736,12.6535351],[-13.3286926,12.6536849],[-13.3287014,12.6538309],[-13.3287453,12.6539946],[-13.3287674,12.6540836],[-13.3287931,12.6541808],[-13.3288289,12.6543336],[-13.3288524,12.6544177],[-13.3288834,12.6545043],[-13.3289039,12.6545552],[-13.3289117,12.6545793],[-13.3289274,12.6546306],[-13.3289598,12.654707],[-13.3289945,12.6547834],[-13.3290326,12.6548587],[-13.3290706,12.654969],[-13.32915,12.6552114],[-13.3291735,12.6552539],[-13.3292037,12.6553107],[-13.3292585,12.6554183],[-13.3292635,12.6554353],[-13.3292721,12.6554528],[-13.329302,12.6555052],[-13.3293276,12.6555576],[-13.3293948,12.6556555],[-13.3294499,12.6557419],[-13.3295054,12.6558297],[-13.3295719,12.6559341],[-13.3297712,12.6562476],[-13.3302563,12.6571948],[-13.3302927,12.6572598],[-13.3303375,12.6573275],[-13.3304046,12.657417],[-13.330512,12.6575568],[-13.330559,12.6576114],[-13.3306373,12.6577074],[-13.330738,12.6578122],[-13.3311065,12.658051],[-13.331475,12.658336],[-13.3315157,12.6583614],[-13.3316029,12.658369],[-13.3316947,12.6583788],[-13.3318038,12.6583889],[-13.3318726,12.6583963],[-13.3319453,12.6584007],[-13.3320729,12.6584138],[-13.3323324,12.6584381],[-13.3324729,12.6584086],[-13.3326342,12.6583752],[-13.3327372,12.6583546],[-13.3328907,12.6583098],[-13.3331692,12.6582249],[-13.3335737,12.6581022],[-13.3343019,12.6578481],[-13.3343971,12.6578157],[-13.3344762,12.657788],[-13.3346091,12.6577494],[-13.3347879,12.6577015],[-13.3349588,12.6576629],[-13.3351281,12.6576212],[-13.3351977,12.6575861],[-13.3354968,12.6574375],[-13.335754,12.657199],[-13.336192,12.656635],[-13.3364336,12.6563506],[-13.3366424,12.6560912],[-13.3367407,12.6558044],[-13.3368636,12.6553533],[-13.3368743,12.6552434],[-13.336906,12.6551323],[-13.3369345,12.6549285],[-13.3369661,12.6547648],[-13.3370041,12.6545796],[-13.3370242,12.6544516],[-13.3370484,12.6543078],[-13.3370832,12.6541318],[-13.3371511,12.6538611],[-13.3371718,12.6537582],[-13.337213,12.6535915],[-13.337302,12.653301],[-13.337401,12.65288],[-13.337554,12.6525396],[-13.338089,12.652044],[-13.338681,12.651578],[-13.3391525,12.6514294],[-13.339327,12.65143],[-13.3393921,12.6514528],[-13.3394813,12.6515064],[-13.3396023,12.6515782],[-13.3396941,12.6516477],[-13.3398523,12.6517912],[-13.3398777,12.6518437],[-13.3399646,12.6519021],[-13.3401118,12.6520228],[-13.3402669,12.6521494],[-13.340536,12.652398],[-13.340989,12.6527391],[-13.3410485,12.6527848],[-13.3411111,12.6528482],[-13.3412029,12.6529224],[-13.3413394,12.6530447],[-13.3414423,12.6531495],[-13.3415184,12.6532368],[-13.3416606,12.6533954],[-13.3417332,12.6534857],[-13.3417735,12.6535294],[-13.3418339,12.6536276],[-13.3419056,12.6537434],[-13.3419906,12.6538831],[-13.3420823,12.6540425],[-13.3421495,12.6541953],[-13.3421982,12.6543193],[-13.3422546,12.6544355],[-13.3422905,12.6545054],[-13.3423531,12.6546298],[-13.3424829,12.6548416],[-13.342662,12.65505],[-13.3428882,12.6551688],[-13.3432776,12.6553571],[-13.3434832,12.6554967],[-13.3435772,12.65556],[-13.3436756,12.6556561],[-13.3438289,12.655838],[-13.344222,12.656367],[-13.3446025,12.6569805],[-13.3446721,12.6571288],[-13.3447165,12.6572172],[-13.3447829,12.6573943],[-13.3448493,12.6575672],[-13.3449443,12.6578667],[-13.345071,12.6583908],[-13.4836472,12.6738999],[-13.5576032,12.6747345],[-13.58023,12.6749899],[-13.6115827,12.6752874],[-13.61607,12.6753299],[-13.64705,12.6756299],[-13.7081477,12.6756152],[-13.709542,12.607889],[-13.684878,12.555673],[-13.671439,12.520106],[-13.671008,12.519824],[-13.670034,12.519634],[-13.669287,12.5197],[-13.66887,12.519532],[-13.667794,12.519561],[-13.667538,12.519605],[-13.667252,12.51959],[-13.667077,12.519495],[-13.666879,12.519568],[-13.666703,12.519517],[-13.666337,12.519561],[-13.665466,12.519854],[-13.665335,12.519971],[-13.665291,12.520088],[-13.664932,12.520198],[-13.664551,12.520469],[-13.664346,12.520512],[-13.664024,12.520337],[-13.663819,12.520344],[-13.663395,12.520483],[-13.663219,12.520447],[-13.662948,12.5203],[-13.662816,12.520095],[-13.662626,12.519978],[-13.662392,12.52],[-13.662077,12.520124],[-13.661901,12.520139],[-13.661653,12.520102],[-13.661411,12.519912],[-13.661104,12.519971],[-13.660825,12.520124],[-13.660525,12.520139],[-13.660254,12.519817],[-13.659383,12.519751],[-13.659339,12.519612],[-13.659493,12.51929],[-13.659478,12.519085],[-13.659354,12.518917],[-13.659017,12.518712],[-13.658959,12.518617],[-13.658995,12.518529],[-13.659266,12.51839],[-13.659522,12.518016],[-13.659588,12.517731],[-13.659588,12.517519],[-13.659456,12.517313],[-13.65901,12.517006],[-13.658578,12.516428],[-13.658498,12.516245],[-13.658402,12.516135],[-13.658248,12.516084],[-13.658146,12.515967],[-13.65808,12.515747],[-13.657963,12.515601],[-13.65778,12.515571],[-13.657458,12.515601],[-13.657378,12.515535],[-13.657356,12.515476],[-13.657407,12.515279],[-13.657326,12.515154],[-13.657019,12.514949],[-13.656411,12.514085],[-13.656016,12.513844],[-13.655848,12.513661],[-13.655628,12.513536],[-13.655035,12.51347],[-13.654779,12.513309],[-13.654603,12.513082],[-13.654596,12.512519],[-13.654493,12.512314],[-13.65412,12.511911],[-13.653966,12.511421],[-13.65382,12.511172],[-13.653783,12.510689],[-13.653725,12.510513],[-13.65352,12.510286],[-13.653483,12.510169],[-13.65352,12.510023],[-13.653703,12.509891],[-13.653761,12.509744],[-13.653717,12.509657],[-13.653095,12.509254],[-13.653066,12.509064],[-13.653234,12.508705],[-13.653059,12.508083],[-13.652949,12.507914],[-13.652283,12.507753],[-13.652209,12.507651],[-13.652517,12.50746],[-13.652554,12.507321],[-13.652407,12.507036],[-13.652407,12.506919],[-13.652875,12.506509],[-13.652912,12.506355],[-13.652868,12.506026],[-13.652539,12.505792],[-13.652502,12.505667],[-13.652627,12.50514],[-13.65259,12.504964],[-13.652524,12.504913],[-13.652246,12.504884],[-13.652151,12.504818],[-13.652019,12.504467],[-13.65169,12.504342],[-13.65147,12.504335],[-13.651338,12.50424],[-13.651258,12.504122],[-13.65125,12.503983],[-13.651163,12.503852],[-13.651046,12.503771],[-13.650745,12.503793],[-13.650533,12.503735],[-13.650291,12.503281],[-13.649933,12.503083],[-13.649669,12.502717],[-13.649325,12.502754],[-13.649186,12.502863],[-13.649076,12.502878],[-13.648989,12.502827],[-13.648842,12.5026],[-13.648828,12.502248],[-13.648688,12.501948],[-13.648469,12.501729],[-13.648139,12.501648],[-13.647978,12.50167],[-13.647869,12.501568],[-13.647905,12.501451],[-13.648044,12.501348],[-13.648125,12.501202],[-13.648139,12.500982],[-13.648029,12.500741],[-13.647737,12.500396],[-13.647495,12.500009],[-13.64707,12.499657],[-13.646968,12.499512],[-13.646939,12.499284],[-13.646858,12.49913],[-13.646551,12.499013],[-13.646382,12.498859],[-13.646265,12.498552],[-13.645987,12.498361],[-13.645855,12.498171],[-13.645804,12.49801],[-13.645643,12.497856],[-13.645387,12.497739],[-13.645277,12.497578],[-13.645182,12.497088],[-13.6416372,12.4898852],[-13.6365488,12.4645405],[-13.6363737,12.43276],[-13.6348777,12.4301711],[-13.6350634,12.4301069],[-13.6352619,12.4300493],[-13.6354939,12.4299395],[-13.6356589,12.4298816],[-13.635789,12.4297719],[-13.6359217,12.4296878],[-13.6360411,12.4296566],[-13.6361913,12.4296357],[-13.6364756,12.4296357],[-13.6368243,12.4296357],[-13.6370872,12.4295885],[-13.6373326,12.4294887],[-13.6375203,12.4293525],[-13.6376544,12.4292215],[-13.6377362,12.4291275],[-13.637838,12.429086],[-13.6379786,12.4291262],[-13.638234,12.429086],[-13.63839,12.428963],[-13.638571,12.428918],[-13.639207,12.428976],[-13.639524,12.428918],[-13.640145,12.428626],[-13.64053,12.428278],[-13.640786,12.428187],[-13.641024,12.427839],[-13.641372,12.42761],[-13.641681,12.427511],[-13.64237,12.427515],[-13.643078,12.427854],[-13.643609,12.427905],[-13.643819,12.427876],[-13.644129,12.427732],[-13.644737,12.427187],[-13.644925,12.427183],[-13.645172,12.427257],[-13.64584,12.427647],[-13.6463,12.427802],[-13.646478,12.427802],[-13.646798,12.427614],[-13.647137,12.42757],[-13.647318,12.427481],[-13.647665,12.427201],[-13.647772,12.427105],[-13.647871,12.426906],[-13.648129,12.426748],[-13.648199,12.426619],[-13.648214,12.426475],[-13.648122,12.426224],[-13.648133,12.425981],[-13.648572,12.425557],[-13.648708,12.425476],[-13.649274,12.425358],[-13.649434,12.425265],[-13.649609,12.424966],[-13.64982,12.424864],[-13.649918,12.424745],[-13.650144,12.424632],[-13.65032,12.424606],[-13.650737,12.424271],[-13.650866,12.424251],[-13.651051,12.424127],[-13.651339,12.424029],[-13.651375,12.423844],[-13.651772,12.423633],[-13.651993,12.423582],[-13.652117,12.42337],[-13.653383,12.42334],[-13.653568,12.423273],[-13.653795,12.423067],[-13.654192,12.423],[-13.654284,12.422943],[-13.65448,12.422933],[-13.654598,12.422814],[-13.654675,12.422516],[-13.654758,12.422439],[-13.654789,12.42231],[-13.654706,12.422011],[-13.655015,12.421424],[-13.654928,12.421115],[-13.654959,12.42093],[-13.655077,12.420662],[-13.65534,12.420523],[-13.655432,12.420389],[-13.655577,12.419864],[-13.655721,12.419684],[-13.655736,12.419442],[-13.655808,12.419288],[-13.655793,12.419138],[-13.655715,12.419082],[-13.6557,12.418984],[-13.655901,12.418762],[-13.655973,12.418582],[-13.656024,12.418175],[-13.656153,12.417841],[-13.656148,12.417676],[-13.655973,12.417501],[-13.655582,12.417228],[-13.655531,12.417069],[-13.655557,12.416991],[-13.656108,12.41666],[-13.656581,12.416938],[-13.656876,12.416952],[-13.656969,12.416893],[-13.656979,12.41651],[-13.657195,12.416279],[-13.657215,12.41619],[-13.657113,12.415463],[-13.6572,12.415087],[-13.657515,12.41465],[-13.657593,12.414336],[-13.657681,12.414205],[-13.658057,12.414056],[-13.658249,12.413803],[-13.658406,12.41368],[-13.658494,12.413698],[-13.658703,12.413925],[-13.658922,12.413942],[-13.659114,12.413733],[-13.65921,12.413532],[-13.659621,12.413322],[-13.660241,12.413138],[-13.660731,12.412693],[-13.660975,12.412535],[-13.661107,12.412491],[-13.661378,12.4125],[-13.661509,12.412439],[-13.661605,12.412334],[-13.661605,12.412089],[-13.661185,12.41167],[-13.661107,12.411539],[-13.661089,12.411277],[-13.661203,12.411084],[-13.661421,12.410962],[-13.661797,12.411067],[-13.661981,12.410936],[-13.661771,12.410464],[-13.661753,12.410254],[-13.661832,12.409957],[-13.662059,12.409712],[-13.66254,12.409642],[-13.662741,12.409572],[-13.662828,12.409476],[-13.662907,12.409301],[-13.662855,12.408969],[-13.663093,12.40843],[-13.663203,12.408359],[-13.663664,12.4083],[-13.663839,12.408093],[-13.663911,12.407937],[-13.664998,12.407601],[-13.665243,12.407442],[-13.665415,12.407227],[-13.665495,12.406996],[-13.665495,12.406673],[-13.665681,12.406212],[-13.666001,12.405821],[-13.666263,12.405627],[-13.666319,12.405487],[-13.666146,12.404985],[-13.666319,12.404678],[-13.666341,12.404565],[-13.666297,12.404387],[-13.666351,12.404214],[-13.666465,12.404117],[-13.666545,12.403966],[-13.666502,12.40361],[-13.666583,12.403092],[-13.666706,12.402898],[-13.666634,12.402736],[-13.666634,12.40256],[-13.666784,12.402424],[-13.666797,12.40234],[-13.666706,12.402093],[-13.666725,12.401769],[-13.667076,12.400684],[-13.667032,12.400151],[-13.667085,12.399915],[-13.666989,12.399469],[-13.666779,12.399041],[-13.666498,12.398598],[-13.665843,12.39791],[-13.665772,12.397476],[-13.665616,12.397126],[-13.66559,12.39697],[-13.665597,12.396756],[-13.665843,12.395854],[-13.66572,12.395413],[-13.665794,12.394782],[-13.665873,12.394636],[-13.665707,12.394147],[-13.666062,12.393884],[-13.666333,12.393543],[-13.666508,12.392835],[-13.666412,12.392547],[-13.666342,12.392058],[-13.666141,12.391603],[-13.666123,12.391236],[-13.666202,12.39086],[-13.66615,12.390511],[-13.665975,12.390196],[-13.665546,12.389619],[-13.664935,12.388501],[-13.664454,12.387784],[-13.664026,12.386848],[-13.663967,12.386565],[-13.664026,12.385969],[-13.663948,12.385617],[-13.663469,12.385217],[-13.663117,12.384816],[-13.663029,12.384376],[-13.662922,12.384171],[-13.662795,12.383702],[-13.662179,12.382774],[-13.661984,12.382266],[-13.6617,12.381074],[-13.661241,12.380233],[-13.661089,12.380067],[-13.660818,12.379516],[-13.659813,12.378729],[-13.659236,12.377497],[-13.659114,12.377375],[-13.658572,12.377104],[-13.658441,12.37699],[-13.658502,12.376737],[-13.658817,12.376282],[-13.658991,12.375924],[-13.659044,12.37574],[-13.659,12.375329],[-13.658782,12.375163],[-13.65852,12.375111],[-13.658423,12.375172],[-13.658196,12.375548],[-13.658109,12.375565],[-13.657986,12.375557],[-13.657654,12.375303],[-13.657602,12.375181],[-13.65762,12.37491],[-13.657759,12.374447],[-13.657681,12.374167],[-13.657445,12.373783],[-13.6572,12.373485],[-13.657191,12.373372],[-13.657209,12.373284],[-13.657462,12.372979],[-13.657497,12.372611],[-13.657431,12.372461],[-13.657274,12.372269],[-13.657011,12.372143],[-13.65689,12.371971],[-13.656364,12.371779],[-13.656248,12.371643],[-13.656116,12.371258],[-13.65601,12.371132],[-13.655606,12.370991],[-13.655196,12.370985],[-13.654939,12.370809],[-13.654605,12.370738],[-13.654504,12.370637],[-13.654362,12.370586],[-13.654008,12.370561],[-13.653897,12.370434],[-13.653857,12.370237],[-13.653761,12.370131],[-13.653377,12.370086],[-13.653195,12.37001],[-13.653058,12.369894],[-13.652588,12.36998],[-13.652482,12.369914],[-13.652447,12.369767],[-13.652522,12.369454],[-13.652376,12.369247],[-13.65229,12.368918],[-13.652108,12.368756],[-13.652098,12.368473],[-13.651739,12.368256],[-13.651683,12.367639],[-13.651435,12.367306],[-13.651395,12.367154],[-13.651532,12.366734],[-13.65135,12.36636],[-13.651471,12.365831],[-13.651627,12.365538],[-13.651868,12.365265],[-13.652396,12.364932],[-13.652461,12.364835],[-13.652441,12.364398],[-13.652568,12.363705],[-13.652393,12.363469],[-13.652393,12.3634],[-13.652454,12.363059],[-13.652524,12.362901],[-13.652643,12.362744],[-13.653323,12.362288],[-13.653599,12.36215],[-13.653748,12.361949],[-13.653765,12.361844],[-13.653748,12.36166],[-13.65359,12.361389],[-13.653415,12.361215],[-13.653372,12.36104],[-13.653258,12.360935],[-13.653022,12.360839],[-13.652956,12.360686],[-13.653003,12.360305],[-13.653206,12.360122],[-13.653311,12.35993],[-13.653337,12.359816],[-13.653284,12.359423],[-13.653326,12.359218],[-13.653203,12.359025],[-13.652793,12.358614],[-13.652761,12.358471],[-13.652865,12.358139],[-13.652855,12.358003],[-13.652684,12.357636],[-13.652689,12.357515],[-13.652871,12.357039],[-13.653649,12.356564],[-13.654278,12.356478],[-13.654448,12.356413],[-13.654662,12.356217],[-13.654956,12.356139],[-13.655034,12.355989],[-13.655027,12.355748],[-13.655249,12.355612],[-13.655307,12.355319],[-13.655548,12.355091],[-13.655841,12.354563],[-13.65605,12.354322],[-13.656232,12.354263],[-13.656636,12.354296],[-13.657066,12.354446],[-13.6573,12.354478],[-13.657652,12.354374],[-13.657887,12.354237],[-13.657951,12.3541],[-13.657932,12.353703],[-13.658088,12.353496],[-13.658462,12.352632],[-13.658477,12.352162],[-13.658624,12.351884],[-13.658659,12.351732],[-13.658639,12.351489],[-13.658694,12.351363],[-13.659048,12.35106],[-13.659245,12.350716],[-13.659457,12.350615],[-13.659493,12.350261],[-13.659548,12.350125],[-13.659746,12.350044],[-13.660089,12.350226],[-13.660357,12.350205],[-13.660645,12.350125],[-13.661255,12.349838],[-13.661995,12.349589],[-13.662617,12.349139],[-13.663046,12.348937],[-13.663162,12.348841],[-13.663264,12.348598],[-13.663567,12.348224],[-13.663658,12.348022],[-13.663992,12.347764],[-13.664133,12.347461],[-13.664244,12.34737],[-13.664522,12.347279],[-13.664608,12.347178],[-13.664704,12.346905],[-13.664831,12.346809],[-13.664862,12.346454],[-13.665123,12.346115],[-13.665182,12.345783],[-13.665142,12.345594],[-13.664953,12.345301],[-13.664739,12.344845],[-13.664732,12.344682],[-13.664966,12.344363],[-13.664947,12.344213],[-13.664993,12.344089],[-13.665071,12.344011],[-13.666048,12.343631],[-13.666246,12.343516],[-13.666298,12.34342],[-13.666272,12.343176],[-13.665573,12.342642],[-13.665267,12.342328],[-13.664708,12.341541],[-13.66462,12.341349],[-13.664585,12.340763],[-13.66448,12.340475],[-13.664358,12.340265],[-13.664139,12.34002],[-13.66407,12.339854],[-13.664183,12.339285],[-13.664187,12.339113],[-13.664133,12.338945],[-13.664035,12.338818],[-13.66383,12.338715],[-13.663288,12.338773],[-13.662927,12.338641],[-13.662914,12.33844],[-13.662968,12.338354],[-13.663185,12.338231],[-13.663239,12.338153],[-13.66323,12.338038],[-13.662763,12.337591],[-13.662586,12.337332],[-13.662508,12.337053],[-13.662508,12.336873],[-13.66266,12.336667],[-13.662705,12.33652],[-13.662652,12.336421],[-13.662332,12.336257],[-13.662299,12.336126],[-13.662492,12.335683],[-13.662356,12.335465],[-13.662332,12.335207],[-13.661919,12.334978],[-13.661841,12.334383],[-13.661753,12.334191],[-13.661684,12.33413],[-13.661308,12.3342],[-13.661203,12.334165],[-13.660898,12.333843],[-13.660853,12.333332],[-13.660608,12.332977],[-13.660608,12.332752],[-13.660032,12.332128],[-13.659866,12.331726],[-13.659749,12.331178],[-13.659594,12.330872],[-13.659713,12.330312],[-13.6597,12.330153],[-13.659541,12.330026],[-13.659521,12.329944],[-13.659561,12.329748],[-13.6595,12.329589],[-13.659492,12.329311],[-13.6593,12.329086],[-13.659251,12.328788],[-13.658989,12.328628],[-13.658916,12.328305],[-13.658695,12.328309],[-13.658638,12.328256],[-13.658617,12.328089],[-13.658454,12.328081],[-13.658201,12.327864],[-13.658205,12.327786],[-13.658392,12.327656],[-13.658413,12.32759],[-13.65838,12.327512],[-13.658397,12.327222],[-13.658503,12.326949],[-13.658482,12.326822],[-13.658515,12.326724],[-13.658687,12.326613],[-13.658744,12.326532],[-13.658728,12.326462],[-13.658605,12.326291],[-13.658303,12.326098],[-13.658102,12.325608],[-13.657992,12.32551],[-13.657931,12.325338],[-13.65773,12.325281],[-13.65762,12.32515],[-13.6571435,12.325043],[-13.6570865,12.324883],[-13.6572495,12.324834],[-13.6572575,12.324789],[-13.6571675,12.324716],[-13.6571555,12.324577],[-13.6570735,12.324466],[-13.6572705,12.324274],[-13.6571925,12.324144],[-13.6571065,12.32409],[-13.6570335,12.324103],[-13.6568485,12.324207],[-13.6566385,12.324076],[-13.6565945,12.323972],[-13.6566555,12.323771],[-13.6569005,12.323587],[-13.6571065,12.323314],[-13.6571445,12.322936],[-13.6571945,12.322813],[-13.657707,12.322638],[-13.65778,12.322533],[-13.657807,12.322109],[-13.658049,12.321694],[-13.65809,12.321516],[-13.658275,12.321439],[-13.658362,12.321352],[-13.658345,12.321203],[-13.658126,12.321005],[-13.658044,12.320864],[-13.658076,12.320718],[-13.658199,12.320609],[-13.658227,12.320454],[-13.658149,12.320271],[-13.658163,12.319961],[-13.658291,12.319879],[-13.658414,12.319884],[-13.658715,12.319998],[-13.658838,12.319934],[-13.659234,12.319646],[-13.659321,12.319432],[-13.659317,12.319209],[-13.659371,12.319086],[-13.659526,12.319013],[-13.659814,12.31899],[-13.660024,12.318771],[-13.660087,12.318502],[-13.660019,12.318256],[-13.659841,12.317991],[-13.659882,12.317886],[-13.660178,12.317763],[-13.660416,12.317494],[-13.660607,12.317394],[-13.660662,12.317321],[-13.661091,12.317143],[-13.661236,12.316796],[-13.661218,12.316682],[-13.660986,12.316313],[-13.660986,12.316181],[-13.661027,12.316089],[-13.6612,12.315943],[-13.661319,12.315556],[-13.661556,12.315309],[-13.661583,12.315195],[-13.661797,12.31494],[-13.66192,12.314712],[-13.66203,12.314644],[-13.662103,12.314493],[-13.662103,12.314343],[-13.662158,12.314206],[-13.662278,12.314063],[-13.66247,12.313993],[-13.662916,12.314063],[-13.663309,12.314072],[-13.664113,12.313801],[-13.66452,12.3138],[-13.664848,12.313586],[-13.665286,12.313435],[-13.665519,12.313212],[-13.665587,12.31276],[-13.665651,12.312651],[-13.666029,12.312546],[-13.666144,12.3124],[-13.666359,12.311852],[-13.666659,12.311292],[-13.666837,12.311109],[-13.667207,12.310847],[-13.667426,12.310751],[-13.667697,12.310724],[-13.667963,12.310617],[-13.668405,12.310653],[-13.668633,12.310425],[-13.668789,12.310371],[-13.669016,12.310375],[-13.669121,12.310322],[-13.669217,12.310095],[-13.669191,12.309807],[-13.669304,12.309668],[-13.669646,12.309399],[-13.669856,12.309427],[-13.670056,12.309527],[-13.67049,12.309527],[-13.670946,12.309199],[-13.671142,12.309121],[-13.671616,12.309185],[-13.671748,12.309116],[-13.672086,12.308683],[-13.672747,12.308382],[-13.672824,12.308287],[-13.672961,12.308268],[-13.673267,12.308359],[-13.673344,12.308328],[-13.673372,12.30825],[-13.673454,12.308195],[-13.673577,12.308195],[-13.673823,12.308328],[-13.674248,12.308223],[-13.674466,12.308323],[-13.674621,12.308478],[-13.674904,12.30856],[-13.675793,12.308446],[-13.67598,12.308451],[-13.676113,12.308505],[-13.676592,12.308902],[-13.677025,12.309349],[-13.67733,12.309536],[-13.67744,12.309559],[-13.677777,12.309828],[-13.677923,12.310092],[-13.678119,12.31017],[-13.678393,12.310466],[-13.678461,12.31064],[-13.679186,12.311141],[-13.679236,12.311224],[-13.680057,12.311885],[-13.680167,12.312044],[-13.680413,12.312113],[-13.680983,12.312509],[-13.681049,12.312636],[-13.681334,12.312769],[-13.681818,12.312792],[-13.682014,12.312769],[-13.682192,12.312674],[-13.68267,12.312696],[-13.682853,12.31266],[-13.683063,12.31255],[-13.683565,12.31247],[-13.683904,12.312265],[-13.684001,12.312047],[-13.684226,12.311907],[-13.684494,12.311895],[-13.684737,12.312004],[-13.685001,12.311878],[-13.685439,12.311476],[-13.686146,12.310637],[-13.686251,12.310445],[-13.686342,12.309973],[-13.686701,12.309596],[-13.686804,12.30931],[-13.686835,12.309049],[-13.686938,12.308854],[-13.686944,12.308672],[-13.68709,12.308465],[-13.687121,12.308204],[-13.687029,12.307918],[-13.687029,12.307748],[-13.687279,12.307042],[-13.687218,12.306866],[-13.687273,12.306264],[-13.687309,12.306155],[-13.687559,12.305844],[-13.687577,12.305747],[-13.687492,12.305267],[-13.687401,12.305121],[-13.687641,12.304764],[-13.687728,12.304458],[-13.687711,12.304274],[-13.687595,12.303984],[-13.687613,12.30385],[-13.687929,12.303297],[-13.687899,12.302956],[-13.688112,12.302537],[-13.688167,12.301995],[-13.68827,12.301837],[-13.688401,12.301041],[-13.688595,12.30029],[-13.689083,12.298882],[-13.689249,12.298541],[-13.689363,12.298121],[-13.689389,12.297999],[-13.689258,12.297737],[-13.689231,12.297553],[-13.689433,12.297274],[-13.68966,12.297125],[-13.689887,12.297046],[-13.690097,12.296889],[-13.690263,12.296662],[-13.690359,12.296408],[-13.690416,12.29597],[-13.690483,12.295781],[-13.690727,12.295495],[-13.691043,12.295301],[-13.691231,12.295242],[-13.691459,12.295076],[-13.691811,12.294724],[-13.692412,12.294475],[-13.692764,12.294227],[-13.6932728,12.2938488],[-13.6943248,12.2946344],[-13.694865,12.2949353],[-13.6956468,12.2951018],[-13.6963006,12.2949492],[-13.6968227,12.2946065],[-13.6972956,12.2940742],[-13.6980157,12.2932595],[-13.6989013,12.2917442],[-13.6998813,12.2880539],[-13.7011219,12.2821995],[-13.7029585,12.2758732],[-13.7049522,12.2689373],[-13.7065909,12.2646599],[-13.7087703,12.2604365],[-13.7116147,12.2565192],[-13.7147111,12.2524302],[-13.7178769,12.2490192],[-13.7196459,12.248195],[-13.7215331,12.2475461],[-13.7271719,12.2470931],[-13.7283417,12.247093],[-13.7310555,12.2480439],[-13.7328117,12.2499096],[-13.7368119,12.2580974],[-13.7383622,12.2606176],[-13.7409836,12.2646667],[-13.7423506,12.2674762],[-13.7434218,12.2689498],[-13.74422,12.2700619],[-13.7462526,12.2715776],[-13.751732,12.2748151],[-13.754803,12.2762663],[-13.7571772,12.2768133],[-13.7595549,12.2771387],[-13.7616705,12.2770319],[-13.7636119,12.2758724],[-13.7645777,12.2749369],[-13.7698614,12.2668701],[-13.7713412,12.2643362],[-13.7723137,12.2612787],[-13.7732348,12.2569093],[-13.7734872,12.255328],[-13.7740707,12.2537393],[-13.7753921,12.2522543],[-13.7768761,12.2514028],[-13.7784749,12.2512375],[-13.7829492,12.2524237],[-13.7878001,12.2525814],[-13.7927978,12.2514359],[-13.7969585,12.25088],[-13.7999382,12.2516325],[-13.8050284,12.2564709],[-13.8063634,12.2589299],[-13.8070057,12.261861],[-13.8066607,12.2635345],[-13.805702,12.265158],[-13.8029599,12.2668212],[-13.7996943,12.2685263],[-13.7951248,12.2712316],[-13.7938891,12.273296],[-13.7933738,12.2862019],[-13.793771,12.2896901],[-13.7955592,12.2945301],[-13.7966979,12.2963206],[-13.7980851,12.2973075],[-13.7993105,12.2976131],[-13.8003248,12.2972798],[-13.8016488,12.2958808],[-13.8046541,12.290477],[-13.805848,12.2872259],[-13.8081257,12.2802042],[-13.8093149,12.2761916],[-13.8103854,12.2743703],[-13.8149584,12.26968],[-13.8182093,12.2667216],[-13.8194345,12.2648891],[-13.8200724,12.2634137],[-13.8214394,12.259841],[-13.8223537,12.2581859],[-13.8235239,12.257725],[-13.82492,12.2579055],[-13.8263068,12.2589179],[-13.8271698,12.2600964],[-13.8285872,12.2642774],[-13.8299621,12.2690088],[-13.8305149,12.2726871],[-13.8300737,12.2770136],[-13.8301149,12.2811374],[-13.8311198,12.2832433],[-13.8328899,12.2841037],[-13.834864,12.2846003],[-13.8374142,12.2844756],[-13.8512004,12.2825492],[-13.8552691,12.2813483],[-13.8609416,12.2784917],[-13.8631805,12.2770478],[-13.8640887,12.2760859],[-13.8644454,12.2751529],[-13.8643028,12.2741585],[-13.863616,12.2735301],[-13.8596431,12.2706334],[-13.8556932,12.2677313],[-13.8531365,12.2649577],[-13.8523513,12.2628721],[-13.8520589,12.25999],[-13.8525001,12.256867],[-13.8533554,12.2529742],[-13.8558823,12.2466665],[-13.8566703,12.243492],[-13.8570771,12.2422904],[-13.8585739,12.2411575],[-13.8604883,12.2407779],[-13.8635517,12.2406606],[-13.869019,12.2402343],[-13.8733182,12.2404098],[-13.8782312,12.239836],[-13.8936425,12.2373404],[-13.8991216,12.2368196],[-13.9051342,12.236207],[-13.9111712,12.2358556],[-13.9161093,12.2355805],[-13.9191876,12.2346134],[-13.9205502,12.2336419],[-13.9211465,12.2327674],[-13.9216322,12.2303703],[-13.9220606,12.2246016],[-13.9241961,12.2176082],[-13.9259056,12.2137176],[-13.9278761,12.2104232],[-13.9303576,12.2074012],[-13.9335427,12.2038487],[-13.9354638,12.2023402],[-13.9370494,12.2018779],[-13.9393189,12.202221],[-13.9436724,12.2022518],[-13.9468481,12.2017556],[-13.9490715,12.2012963],[-13.9506993,12.20103],[-13.9534489,12.2006589],[-13.9540384,12.2005754],[-13.9544783,12.2005374],[-13.9549238,12.2005282],[-13.9561869,12.200532],[-13.9564366,12.2005062],[-13.9566238,12.2004538],[-13.9568072,12.2003709],[-13.9569473,12.200227],[-13.9570339,12.2000332],[-13.9570843,12.199802],[-13.9570984,12.1995241],[-13.9570808,12.1991872],[-13.9570368,12.1989448],[-13.9569027,12.1985035],[-13.9567099,12.1979661],[-13.9566257,12.1977204],[-13.9565868,12.1974903],[-13.9565723,12.197234],[-13.9565962,12.1969524],[-13.9567013,12.1959941],[-13.956837,12.1949557],[-13.9568714,12.194398],[-13.9568823,12.1939148],[-13.95687,12.1934335],[-13.9568307,12.1930097],[-13.9563765,12.1908861],[-13.9552687,12.188292],[-13.9549175,12.18757],[-13.9548156,12.1870985],[-13.9548045,12.186768],[-13.9548426,12.1864427],[-13.9549287,12.1861595],[-13.9551173,12.1857828],[-13.9552887,12.1855051],[-13.9556143,12.1850164],[-13.9563262,12.1840228],[-13.9565347,12.1836943],[-13.9567521,12.1833073],[-13.9575702,12.1818037],[-13.9577537,12.1814512],[-13.9578306,12.1811367],[-13.9578797,12.1808281],[-13.957884,12.1805282],[-13.9578472,12.1802086],[-13.9577547,12.1799458],[-13.9576042,12.1796519],[-13.9572958,12.1792227],[-13.9570175,12.1790244],[-13.9566821,12.1788342],[-13.956408,12.1787395],[-13.9560821,12.1787136],[-13.9558562,12.1787558],[-13.955636,12.1788759],[-13.9552654,12.1791848],[-13.955043,12.1792757],[-13.9548204,12.1792954],[-13.9545811,12.1792962],[-13.954381,12.1792458],[-13.9542094,12.1791331],[-13.9540995,12.179031],[-13.9540101,12.1789034],[-13.9539685,12.1787613],[-13.9539358,12.1785353],[-13.9539099,12.1780218],[-13.9539189,12.1777799],[-13.9539315,12.1774299],[-13.953957,12.1766371],[-13.9539886,12.1763065],[-13.9540047,12.1761282],[-13.9540986,12.1758435],[-13.9541281,12.1756195],[-13.9541265,12.1754827],[-13.9540584,12.1752682],[-13.954027,12.1751842],[-13.9539706,12.1750278],[-13.9539683,12.174867],[-13.9539479,12.1745706],[-13.9538935,12.1744068],[-13.9537692,12.1742249],[-13.9536469,12.1741209],[-13.9534814,12.1740149],[-13.9531628,12.1738734],[-13.9529884,12.1737795],[-13.9528202,12.1736741],[-13.9522113,12.1731119],[-13.9521231,12.1729932],[-13.9520483,12.1728621],[-13.951945,12.1725991],[-13.9518496,12.1723325],[-13.9517538,12.1721285],[-13.951613,12.1718547],[-13.9514518,12.1716657],[-13.9496175,12.1693754],[-13.9493807,12.1690229],[-13.9486241,12.1675777],[-13.9485635,12.1673066],[-13.9485672,12.1668158],[-13.9486405,12.1663317],[-13.9491224,12.1647067],[-13.9492323,12.1641907],[-13.9493059,12.1636694],[-13.94933,12.1628944],[-13.9494947,12.1603904],[-13.9495001,12.1598838],[-13.9494776,12.1595985],[-13.9494427,12.1592624],[-13.9493601,12.1589572],[-13.9491604,12.1586021],[-13.9481998,12.1567153],[-13.9468149,12.1540041],[-13.9449277,12.1518304],[-13.9410812,12.1484009],[-13.9377964,12.144907],[-13.9371906,12.1454271],[-13.9369048,12.1458114],[-13.9363141,12.146496],[-13.9361221,12.146762],[-13.9354921,12.147087],[-13.9353041,12.147235],[-13.9351371,12.147481],[-13.9349791,12.147619],[-13.9345561,12.147831],[-13.9338711,12.148092],[-13.9331861,12.148196],[-13.9296427,12.149769],[-13.9287309,12.1500524],[-13.9277761,12.1499165],[-13.9266647,12.1493584],[-13.9256821,12.148297],[-13.9247691,12.148243],[-13.9234441,12.148028],[-13.9223521,12.147795],[-13.9214882,12.1476924],[-13.9203041,12.147412],[-13.9183691,12.147417],[-13.9180731,12.147309],[-13.9175901,12.147255],[-13.9172941,12.147097],[-13.9171621,12.147082],[-13.9164721,12.147196],[-13.9160931,12.147142],[-13.9156341,12.147142],[-13.9152901,12.147063],[-13.9144621,12.147068],[-13.9142401,12.147018],[-13.9134131,12.147117],[-13.9127081,12.147058],[-13.9123191,12.146989],[-13.9118511,12.146762],[-13.9114721,12.146713],[-13.9113091,12.146609],[-13.9107921,12.146545],[-13.9105801,12.146442],[-13.9103091,12.146299],[-13.9101761,12.146146],[-13.9101221,12.145861],[-13.9100481,12.145767],[-13.9097231,12.145634],[-13.9096001,12.145501],[-13.9095311,12.145481],[-13.9092421,12.145469],[-13.9086941,12.145574],[-13.9083431,12.145679],[-13.9081101,12.145854],[-13.9078881,12.145878],[-13.9076431,12.145808],[-13.9074331,12.145574],[-13.9073621,12.145352],[-13.9073391,12.14499],[-13.9072101,12.144815],[-13.9067321,12.14443],[-13.9064861,12.144395],[-13.9061711,12.144395],[-13.9057321,12.144563],[-13.9046001,12.145679],[-13.9042571,12.14577],[-13.9039851,12.14579],[-13.9033101,12.145699],[-13.9029171,12.145488],[-13.9026761,12.145196],[-13.9023841,12.144692],[-13.9020711,12.14448],[-13.9016381,12.144329],[-13.9011651,12.144319],[-13.9005911,12.14439],[-13.8995131,12.14439],[-13.8991001,12.144511],[-13.8981831,12.144591],[-13.8978111,12.144742],[-13.8972061,12.144883],[-13.8965821,12.144853],[-13.8961891,12.144762],[-13.8956451,12.144551],[-13.8951211,12.144198],[-13.8947051,12.144009],[-13.8942491,12.143577],[-13.8937821,12.143402],[-13.8936191,12.143215],[-13.8935261,12.142993],[-13.8934211,12.1429],[-13.8929891,12.142982],[-13.8928481,12.142958],[-13.8927041,12.142698],[-13.8924521,12.142546],[-13.8923011,12.142506],[-13.8918681,12.142538],[-13.8915051,12.142433],[-13.8912371,12.142211],[-13.8911201,12.142024],[-13.8909281,12.14185],[-13.8906441,12.141791],[-13.8898391,12.141317],[-13.8896971,12.14127],[-13.8891871,12.141235],[-13.8890341,12.141128],[-13.8889501,12.140939],[-13.8888801,12.140417],[-13.8887851,12.140086],[-13.8886661,12.139932],[-13.8883471,12.139719],[-13.8877551,12.139648],[-13.8874471,12.139506],[-13.8869971,12.139375],[-13.8856941,12.139245],[-13.8851731,12.138902],[-13.8845331,12.138345],[-13.8843671,12.138257],[-13.8835961,12.138231],[-13.8834031,12.138134],[-13.8833161,12.137986],[-13.8831841,12.137898],[-13.8829311,12.137898],[-13.8825011,12.138021],[-13.8822471,12.137942],[-13.8821071,12.137828],[-13.8816691,12.137819],[-13.8814071,12.137889],[-13.8812401,12.137846],[-13.8808811,12.137565],[-13.8805571,12.137075],[-13.8801881,12.136924],[-13.8797611,12.136936],[-13.8793231,12.137066],[-13.8789211,12.13709],[-13.8787791,12.137031],[-13.8786961,12.136936],[-13.8783681,12.136444],[-13.8782011,12.136383],[-13.8771681,12.136418],[-13.8765111,12.136873],[-13.8762491,12.136952],[-13.8756411,12.13696],[-13.8754511,12.136924],[-13.8753321,12.136628],[-13.8753551,12.136418],[-13.8755571,12.13626],[-13.8757231,12.13626],[-13.8758721,12.13619],[-13.8760211,12.13584],[-13.8759861,12.135752],[-13.8755041,12.135542],[-13.8753811,12.135437],[-13.8753551,12.135358],[-13.8754171,12.135297],[-13.8756971,12.135201],[-13.8757141,12.135122],[-13.8751711,12.134448],[-13.8752851,12.134054],[-13.8754431,12.133931],[-13.8754951,12.133835],[-13.8754631,12.13362],[-13.8753561,12.133372],[-13.8753551,12.132889],[-13.8752591,12.132591],[-13.8753031,12.132267],[-13.8754081,12.132153],[-13.8754601,12.132004],[-13.8753991,12.131654],[-13.8752761,12.131418],[-13.8750661,12.131155],[-13.8751191,12.130726],[-13.8750931,12.130489],[-13.8748651,12.130218],[-13.8748471,12.129981],[-13.8747861,12.129867],[-13.8746981,12.12978],[-13.8745061,12.129692],[-13.8743041,12.12943],[-13.8740591,12.129254],[-13.8739721,12.129088],[-13.8739541,12.128948],[-13.8740241,12.128755],[-13.8740241,12.128554],[-13.8739801,12.128475],[-13.8738931,12.12837],[-13.8734551,12.128265],[-13.8733501,12.128116],[-13.8733411,12.127888],[-13.8732181,12.127319],[-13.8731311,12.12717],[-13.8729561,12.127065],[-13.8727891,12.126846],[-13.8727021,12.126207],[-13.8724211,12.125935],[-13.8723841,12.125473],[-13.8722421,12.125142],[-13.8719811,12.124786],[-13.8719931,12.124336],[-13.8719341,12.124064],[-13.8719461,12.123318],[-13.8721471,12.122228],[-13.8725381,12.121482],[-13.8730231,12.121021],[-13.8730941,12.120748],[-13.8731301,12.120073],[-13.8730831,12.119765],[-13.8728461,12.119327],[-13.8727861,12.118972],[-13.8727921,12.118804],[-13.8729761,12.118072],[-13.8729761,12.117752],[-13.8728811,12.11761],[-13.8725261,12.11735],[-13.8721231,12.117267],[-13.8721001,12.117196],[-13.8722181,12.116983],[-13.8719221,12.116805],[-13.8718861,12.116533],[-13.8712591,12.116248],[-13.8710811,12.116106],[-13.8710811,12.116],[-13.8709751,12.115786],[-13.8710931,12.115704],[-13.8718861,12.115751],[-13.8720291,12.115585],[-13.8720191,12.115391],[-13.8719401,12.115242],[-13.8720011,12.114594],[-13.8720631,12.114524],[-13.8721731,12.114109],[-13.8722391,12.114063],[-13.8723371,12.113584],[-13.8725261,12.113193],[-13.8726091,12.112802],[-13.8725611,12.112601],[-13.8722771,12.112104],[-13.8722181,12.111571],[-13.8720641,12.111073],[-13.8719221,12.110718],[-13.8717331,12.110398],[-13.8712351,12.109948],[-13.8706321,12.109877],[-13.8702051,12.109747],[-13.8697311,12.109391],[-13.8690461,12.108986],[-13.8688281,12.108815],[-13.8686561,12.108597],[-13.8685231,12.108302],[-13.8681681,12.107841],[-13.8402101,12.100999],[-13.8399841,12.100872],[-13.8393641,12.100919],[-13.8389381,12.100866],[-13.8385521,12.100732],[-13.8378981,12.100761],[-13.8376451,12.100791],[-13.8374541,12.100994],[-13.8373021,12.101039],[-13.8371291,12.100967],[-13.8369871,12.100676],[-13.8368561,12.100589],[-13.8366581,12.100607],[-13.8363711,12.10078],[-13.8362641,12.100776],[-13.8361841,12.100676],[-13.8361871,12.100541],[-13.8363531,12.100132],[-13.8363171,12.099997],[-13.8362121,12.099918],[-13.8361011,12.099913],[-13.8356921,12.100129],[-13.8355301,12.100396],[-13.8354011,12.100507],[-13.8349811,12.100576],[-13.8348571,12.100659],[-13.8347601,12.100798],[-13.8345751,12.100886],[-13.8338681,12.100969],[-13.8335561,12.101069],[-13.8330071,12.101438],[-13.8324111,12.101412],[-13.8321891,12.10147],[-13.8318341,12.101666],[-13.8314981,12.101787],[-13.8310961,12.102072],[-13.8304891,12.10233],[-13.8302041,12.102341],[-13.8299031,12.10242],[-13.8296011,12.102395],[-13.8287471,12.102053],[-13.8278841,12.101873],[-13.8273481,12.101716],[-13.8270531,12.101472],[-13.8269291,12.101282],[-13.8266941,12.10053],[-13.8265781,12.100335],[-13.8264251,12.100171],[-13.8258441,12.099823],[-13.8253901,12.099617],[-13.8248251,12.099511],[-13.8242401,12.099557],[-13.8237901,12.099506],[-13.8235721,12.099589],[-13.8232021,12.099413],[-13.8229351,12.099423],[-13.8227761,12.099478],[-13.8225131,12.099347],[-13.8222741,12.099305],[-13.8219421,12.099464],[-13.8217171,12.099489],[-13.8216031,12.099468],[-13.8213571,12.099101],[-13.8212291,12.098976],[-13.8211111,12.098931],[-13.8210071,12.098935],[-13.8209421,12.09899],[-13.8205331,12.099008],[-13.8203221,12.099115],[-13.8202321,12.099049],[-13.8201421,12.098876],[-13.8200251,12.098783],[-13.8198961,12.098745],[-13.8190411,12.098983],[-13.8185851,12.098873],[-13.8184361,12.098741],[-13.8180971,12.09817],[-13.8177261,12.097924],[-13.8176401,12.097796],[-13.8174011,12.097052],[-13.8173141,12.0969],[-13.8171241,12.09682],[-13.8166461,12.096751],[-13.8165151,12.096671],[-13.8163871,12.096661],[-13.8160131,12.096768],[-13.8157471,12.096768],[-13.8154591,12.096703],[-13.8152711,12.096561],[-13.8150761,12.096492],[-13.8142631,12.096576],[-13.8138751,12.096494],[-13.8137401,12.096374],[-13.8136531,12.096213],[-13.8136261,12.095978],[-13.8137071,12.095864],[-13.8137401,12.095696],[-13.8135775,12.0953767],[-13.8134391,12.095105],[-13.8135591,12.094817],[-13.8136681,12.094336],[-13.8136351,12.094227],[-13.8134211,12.094037],[-13.8130271,12.093871],[-13.8126521,12.093795],[-13.8125861,12.093572],[-13.8124951,12.093472],[-13.8121851,12.093482],[-13.8117961,12.093831],[-13.8115841,12.093961],[-13.8114361,12.093966],[-13.8113181,12.093847],[-13.8112561,12.093676],[-13.8112841,12.093506],[-13.8114431,12.093343],[-13.8118201,12.093117],[-13.8119111,12.092891],[-13.8118481,12.092736],[-13.8116531,12.092676],[-13.8114071,12.092684],[-13.8112291,12.092811],[-13.8109431,12.092772],[-13.8103161,12.092958],[-13.8097741,12.092969],[-13.8096031,12.092841],[-13.8093181,12.092185],[-13.8091801,12.092065],[-13.8089101,12.091975],[-13.8088081,12.091829],[-13.8088081,12.091671],[-13.8088761,12.091469],[-13.8090451,12.091334],[-13.8093261,12.091289],[-13.8092001,12.090907],[-13.8090211,12.090585],[-13.8088891,12.09048],[-13.8087621,12.090464],[-13.8086041,12.090326],[-13.8081711,12.090126],[-13.8079541,12.089851],[-13.8076431,12.089714],[-13.8074801,12.089551],[-13.8073161,12.089239],[-13.8069941,12.089012],[-13.8069201,12.08888],[-13.8068831,12.088685],[-13.8063031,12.088267],[-13.8061701,12.088099],[-13.8061491,12.087861],[-13.8062441,12.087476],[-13.8060281,12.086932],[-13.8060051,12.086527],[-13.8058021,12.086144],[-13.8057911,12.085953],[-13.8059381,12.085322],[-13.8059831,12.084895],[-13.8058361,12.083983],[-13.8058251,12.0836],[-13.8059861,12.083047],[-13.8058861,12.082804],[-13.8057531,12.08272],[-13.8057271,12.082583],[-13.8057481,12.082477],[-13.8058751,12.082387],[-13.8060051,12.081765],[-13.8061211,12.081463],[-13.8062901,12.081246],[-13.8063221,12.081119],[-13.8062231,12.080762],[-13.8062871,12.080414],[-13.8060841,12.079934],[-13.8061581,12.079484],[-13.8060891,12.079357],[-13.8060841,12.079241],[-13.8061161,12.078823],[-13.8062421,12.07859],[-13.8062481,12.078267],[-13.8063381,12.078204],[-13.8064061,12.078061],[-13.8064131,12.077885],[-13.8065451,12.077705],[-13.8065081,12.077473],[-13.8065611,12.077325],[-13.8064611,12.077029],[-13.8061181,12.076887],[-13.8060171,12.076787],[-13.8059541,12.076628],[-13.8059591,12.076507],[-13.8058591,12.07637],[-13.8055691,12.07629],[-13.8054101,12.076122],[-13.8052201,12.076027],[-13.8047721,12.076016],[-13.8043761,12.075784],[-13.8041331,12.075773],[-13.8038691,12.075683],[-13.8036841,12.075583],[-13.8033991,12.07533],[-13.8032561,12.075008],[-13.8028921,12.074907],[-13.8027971,12.074791],[-13.8023641,12.074913],[-13.8022801,12.074907],[-13.8020161,12.074754],[-13.8017841,12.074797],[-13.8012211,12.075484],[-13.8010741,12.075542],[-13.8009551,12.075554],[-13.8006301,12.075467],[-13.8004751,12.075359],[-13.8003361,12.074879],[-13.8002901,12.074274],[-13.8003221,12.073662],[-13.8002371,12.073519],[-13.8001841,12.073466],[-13.7996991,12.073287],[-13.7992021,12.073144],[-13.7987271,12.073081],[-13.7986381,12.073034],[-13.7984271,12.072659],[-13.7982731,12.072205],[-13.7982791,12.071624],[-13.7982051,12.071117],[-13.7979671,12.070579],[-13.7979141,12.069597],[-13.7977251,12.069228],[-13.7975661,12.069027],[-13.7973971,12.068895],[-13.7973501,12.068721],[-13.7973501,12.06833],[-13.7971601,12.067639],[-13.7970169,12.0667118],[-13.7974855,12.0667013],[-13.7980037,12.0667625],[-13.7986551,12.066724],[-13.7997897,12.0668008],[-13.8009069,12.066673],[-13.8016671,12.066806],[-13.8021871,12.066771],[-13.8025231,12.06654],[-13.8028471,12.066546],[-13.8028931,12.066424],[-13.8036471,12.065728],[-13.8037421,12.06558],[-13.8040431,12.065379],[-13.8042591,12.065094],[-13.8044871,12.064989],[-13.8046921,12.064788],[-13.8047561,12.064651],[-13.8050621,12.064412],[-13.8051231,12.064264],[-13.8051251,12.063975],[-13.8052201,12.063901],[-13.8052701,12.063761],[-13.8053311,12.063315],[-13.8053101,12.06284],[-13.8051461,12.062766],[-13.8048721,12.062719],[-13.8046711,12.062508],[-13.8045501,12.062202],[-13.8046021,12.061885],[-13.8047241,12.061806],[-13.8046921,12.061637],[-13.8045871,12.061521],[-13.8043971,12.061457],[-13.8039221,12.061595],[-13.8034301,12.061594],[-13.8030901,12.061648],[-13.8026611,12.061604],[-13.8024741,12.061205],[-13.8023021,12.061012],[-13.8020141,12.061058],[-13.8017201,12.06123],[-13.8014931,12.061205],[-13.8014461,12.061151],[-13.8014091,12.06084],[-13.8011931,12.060581],[-13.8010291,12.060502],[-13.8005431,12.060402],[-13.8001841,12.060106],[-13.7996151,12.060198],[-13.7993981,12.060188],[-13.7991961,12.059894],[-13.7990191,12.059849],[-13.7989021,12.059899],[-13.7987111,12.060175],[-13.7982891,12.060196],[-13.7979571,12.060328],[-13.7977091,12.060375],[-13.7974921,12.060544],[-13.7972701,12.060623],[-13.7971021,12.060634],[-13.7968481,12.060312],[-13.7968221,12.059805],[-13.7969541,12.059351],[-13.7969641,12.059066],[-13.7968481,12.058871],[-13.7967691,12.058818],[-13.7966581,12.058823],[-13.7964051,12.058929],[-13.7960721,12.059124],[-13.7958351,12.059335],[-13.7957031,12.059309],[-13.7956081,12.059161],[-13.7957031,12.058633],[-13.7954181,12.05819],[-13.7954121,12.058068],[-13.7955231,12.057456],[-13.7955341,12.05715],[-13.7956341,12.056849],[-13.7955291,12.056543],[-13.7951781,12.056449],[-13.7950951,12.056378],[-13.7946631,12.056216],[-13.7944941,12.056068],[-13.7943721,12.05574],[-13.7939401,12.055556],[-13.7931061,12.055598],[-13.7926471,12.055371],[-13.7926151,12.055244],[-13.7926731,12.055049],[-13.7931061,12.05479],[-13.7932011,12.054574],[-13.7932431,12.054252],[-13.7931961,12.054109],[-13.7930851,12.053977],[-13.7929211,12.053914],[-13.7922528,12.0539559],[-13.7921073,12.0539251],[-13.7920075,12.0538511],[-13.7919374,12.0536257],[-13.791987,12.0535282],[-13.7922147,12.0533206],[-13.7922256,12.0530975],[-13.7921747,12.0529876],[-13.7916665,12.0525936],[-13.7916046,12.0524811],[-13.7915889,12.0522222],[-13.7917021,12.0518782],[-13.7916714,12.0517217],[-13.7912735,12.0516504],[-13.7911605,12.0511852],[-13.7908032,12.050806],[-13.7906726,12.0505586],[-13.7902415,12.0504066],[-13.7900326,12.0501894],[-13.789998,12.0500214],[-13.7901412,12.0497506],[-13.7901833,12.0495418],[-13.7900956,12.0491237],[-13.7899858,12.0490212],[-13.7897416,12.0490513],[-13.7894724,12.0488624],[-13.7893045,12.048284],[-13.789223,12.0482052],[-13.7890362,12.0480953],[-13.7887927,12.0480696],[-13.7883126,12.048303],[-13.7880777,12.0482765],[-13.7879867,12.0482079],[-13.7878579,12.0480036],[-13.7877748,12.0478453],[-13.7877212,12.0475372],[-13.7875915,12.0473876],[-13.78733,12.0474474],[-13.7871484,12.047655],[-13.7869351,12.047771],[-13.7867678,12.0478016],[-13.7864381,12.047746],[-13.7862431,12.047605],[-13.7860071,12.047165],[-13.7857361,12.047053],[-13.7857201,12.046776],[-13.7856291,12.046612],[-13.7853581,12.046526],[-13.7852201,12.046298],[-13.7847091,12.046319],[-13.7844271,12.04642],[-13.7841511,12.046362],[-13.7839191,12.046478],[-13.7837041,12.04647],[-13.7834551,12.046263],[-13.7831821,12.046201],[-13.7830041,12.045994],[-13.7828581,12.045919],[-13.7821631,12.045364],[-13.7819851,12.045364],[-13.7818151,12.045463],[-13.7812351,12.04565],[-13.7808621,12.045679],[-13.7807251,12.045617],[-13.7805681,12.045468],[-13.7805181,12.045343],[-13.7805201,12.0452754],[-13.7805221,12.045207],[-13.7805641,12.045057],[-13.7808171,12.044606],[-13.7808391,12.044158],[-13.7807121,12.043982],[-13.7805151,12.04387],[-13.7801161,12.043918],[-13.7800681,12.043886],[-13.7799031,12.043498],[-13.7796791,12.043402],[-13.7796951,12.043141],[-13.7796361,12.04299],[-13.7796781,12.042544],[-13.7796481,12.042294],[-13.7795281,12.0421],[-13.7794001,12.042108],[-13.7792301,12.042195],[-13.7790021,12.042419],[-13.7788121,12.042448],[-13.7786461,12.042373],[-13.7784061,12.042116],[-13.7782811,12.041942],[-13.7782981,12.041855],[-13.7782521,12.041785],[-13.7780331,12.041652],[-13.7779331,12.041652],[-13.7778421,12.041582],[-13.7777551,12.041408],[-13.7775941,12.041379],[-13.7770391,12.041615],[-13.7768051,12.041598],[-13.7766881,12.041518],[-13.7766561,12.041401],[-13.7765281,12.041278],[-13.7758901,12.041018],[-13.7757091,12.041076],[-13.7755861,12.041289],[-13.7751611,12.041449],[-13.7750861,12.041518],[-13.7747831,12.041486],[-13.7747191,12.041353],[-13.7747721,12.04113],[-13.7746921,12.040975],[-13.7742881,12.04073],[-13.7743031,12.040587],[-13.7741761,12.040432],[-13.7739521,12.040326],[-13.7737451,12.040342],[-13.7736971,12.04031],[-13.7736591,12.040241],[-13.7736911,12.040001],[-13.7733351,12.039577],[-13.7733691,12.039345],[-13.7734561,12.039155],[-13.7733351,12.038931],[-13.7730061,12.038869],[-13.7723821,12.03891],[-13.7722961,12.038856],[-13.7722291,12.038546],[-13.7724161,12.038252],[-13.7724121,12.038156],[-13.7723411,12.038057],[-13.7717281,12.03763],[-13.7715751,12.037605],[-13.7713471,12.037638],[-13.7711851,12.037734],[-13.7710531,12.037738],[-13.7709291,12.03768],[-13.7708381,12.037589],[-13.7708131,12.037456],[-13.7708291,12.037378],[-13.7709561,12.037228],[-13.7709561,12.037106],[-13.7708601,12.036999],[-13.7707321,12.036941],[-13.7703171,12.036983],[-13.7702531,12.036925],[-13.7701841,12.036696],[-13.7700141,12.036584],[-13.7697421,12.036526],[-13.7696841,12.036318],[-13.7694311,12.036197],[-13.7689161,12.03571],[-13.7687521,12.035323],[-13.7689331,12.034902],[-13.7689281,12.034695],[-13.7688701,12.034508],[-13.7685661,12.034269],[-13.7683431,12.033971],[-13.7680441,12.033769],[-13.7680231,12.033545],[-13.7676771,12.033077],[-13.7675601,12.033013],[-13.7673051,12.033061],[-13.7670971,12.033029],[-13.7668041,12.032832],[-13.7666021,12.032795],[-13.7664531,12.032662],[-13.7659011,12.03237],[-13.7658331,12.032222],[-13.7659741,12.032087],[-13.7659811,12.032011],[-13.7656961,12.031762],[-13.7655461,12.03169],[-13.7655251,12.031603],[-13.7656171,12.031422],[-13.7656021,12.031336],[-13.7655271,12.031278],[-13.7654101,12.031273],[-13.7653301,12.031368],[-13.7651651,12.031363],[-13.7650961,12.031225],[-13.7647761,12.030996],[-13.7646951,12.030838],[-13.7644971,12.03088],[-13.7642291,12.031106],[-13.7639891,12.031113],[-13.7638051,12.031064],[-13.7636011,12.030767],[-13.7632651,12.030575],[-13.7631211,12.030543],[-13.7629351,12.030368],[-13.7625251,12.030267],[-13.7622271,12.029963],[-13.7620361,12.030102],[-13.7617591,12.030102],[-13.7608141,12.029672],[-13.7606391,12.02964],[-13.7605261,12.02968],[-13.7603701,12.029841],[-13.7601461,12.029915],[-13.7598691,12.02991],[-13.7597101,12.029702],[-13.7595581,12.029647],[-13.7590711,12.029697],[-13.7584381,12.030078],[-13.7582311,12.030087],[-13.7580791,12.030036],[-13.7579731,12.030059],[-13.7578111,12.030179],[-13.7576371,12.030202],[-13.7575411,12.030189],[-13.7574421,12.030012],[-13.7572451,12.02985],[-13.7568431,12.029716],[-13.7562361,12.03022],[-13.7561121,12.030211],[-13.7559561,12.030082],[-13.7558361,12.030087],[-13.7556801,12.030179],[-13.7554351,12.030013],[-13.7551641,12.029972],[-13.7550251,12.029907],[-13.7548391,12.029766],[-13.7545361,12.029822],[-13.7538971,12.029479],[-13.7537911,12.029511],[-13.7533821,12.029797],[-13.7532801,12.029778],[-13.7532431,12.029654],[-13.7531151,12.029505],[-13.7531101,12.02941],[-13.7531531,12.029351],[-13.7530891,12.029315],[-13.7529441,12.029327],[-13.7528571,12.029276],[-13.7527741,12.029074],[-13.7525391,12.028788],[-13.7524331,12.028567],[-13.7523461,12.028461],[-13.7522211,12.02842],[-13.7520371,12.02848],[-13.7519541,12.028636],[-13.7519041,12.028655],[-13.7517931,12.02865],[-13.7516091,12.028531],[-13.7513971,12.028566],[-13.7511531,12.028912],[-13.7510191,12.028972],[-13.7508671,12.028954],[-13.7507661,12.028816],[-13.7508531,12.028632],[-13.7508681,12.028489],[-13.7506141,12.028298],[-13.7505081,12.028312],[-13.7503661,12.028447],[-13.7501861,12.028424],[-13.7502271,12.028268],[-13.7500711,12.028176],[-13.7498861,12.028139],[-13.7497961,12.028051],[-13.7497601,12.027826],[-13.7495631,12.027699],[-13.7494501,12.027656],[-13.7492731,12.027797],[-13.7489421,12.027889],[-13.7488291,12.027868],[-13.7487941,12.027811],[-13.7488221,12.027572],[-13.7488011,12.027501],[-13.7487091,12.027473],[-13.7485821,12.027494],[-13.7484621,12.027628],[-13.7483491,12.02767],[-13.7480181,12.027621],[-13.7478631,12.027515],[-13.7478631,12.027416],[-13.7479791,12.027345],[-13.7482191,12.027478],[-13.7482881,12.027387],[-13.7482141,12.027254],[-13.7482461,12.027217],[-13.7477991,12.027092],[-13.7474901,12.026786],[-13.7472141,12.026739],[-13.7469321,12.026817],[-13.7468191,12.026887],[-13.7465861,12.027155],[-13.7463361,12.027169],[-13.7459451,12.026773],[-13.7458531,12.026437],[-13.7458241,12.025942],[-13.7456691,12.025745],[-13.7455981,12.025702],[-13.7454501,12.025872],[-13.7452881,12.025935],[-13.7451451,12.025929],[-13.7449771,12.025743],[-13.7448761,12.025349],[-13.7445781,12.025125],[-13.7439501,12.024976],[-13.7432261,12.024907],[-13.7430191,12.024822],[-13.7429921,12.024683],[-13.7428911,12.024652],[-13.7422901,12.023954],[-13.7420131,12.023885],[-13.7416991,12.023965],[-13.7414601,12.024119],[-13.7413111,12.024284],[-13.7412411,12.024433],[-13.7411291,12.02446],[-13.7410711,12.024428],[-13.7410441,12.024375],[-13.7411191,12.024151],[-13.7410391,12.024018],[-13.7408481,12.023992],[-13.7407411,12.023922],[-13.7405811,12.023672],[-13.7403361,12.023497],[-13.7401451,12.023257],[-13.7400761,12.023023],[-13.7399161,12.022847],[-13.7396231,12.022736],[-13.7394581,12.022736],[-13.7392721,12.022464],[-13.7391231,12.022374],[-13.7389691,12.022421],[-13.7387821,12.022352],[-13.7386231,12.022363],[-13.7384051,12.022539],[-13.7383301,12.022544],[-13.7381861,12.022374],[-13.7379891,12.02232],[-13.7379251,12.022257],[-13.7378301,12.022257],[-13.7377661,12.022315],[-13.7377231,12.022459],[-13.7375851,12.022565],[-13.7375471,12.022885],[-13.7373611,12.02306],[-13.7372711,12.023294],[-13.7370001,12.023406],[-13.7369091,12.023619],[-13.7367391,12.023694],[-13.7366371,12.023656],[-13.7362491,12.023305],[-13.7362281,12.02323],[-13.7363551,12.023129],[-13.7362701,12.02297],[-13.7359031,12.022874],[-13.7357591,12.022783],[-13.7357381,12.02265],[-13.7358071,12.022432],[-13.7356901,12.022177],[-13.7357861,12.021793],[-13.7357221,12.021682],[-13.7355571,12.02157],[-13.7352961,12.021533],[-13.7351841,12.021463],[-13.7350251,12.021479],[-13.7349181,12.021602],[-13.7349181,12.021873],[-13.7348011,12.021943],[-13.7346311,12.021937],[-13.7339971,12.021597],[-13.7339971,12.021442],[-13.7341311,12.021192],[-13.7339821,12.020995],[-13.7337741,12.020942],[-13.7335821,12.021011],[-13.7332841,12.021506],[-13.7330931,12.021543],[-13.7330181,12.021421],[-13.7329601,12.021139],[-13.7323631,12.021011],[-13.7320661,12.020644],[-13.7319751,12.02041],[-13.7319651,12.020197],[-13.7319651,12.02008],[-13.7321241,12.019835],[-13.7320601,12.019712],[-13.7319861,12.019686],[-13.7315711,12.019755],[-13.7312401,12.019665],[-13.7311075,12.0195901],[-13.7309851,12.019521],[-13.7308891,12.019366],[-13.7308681,12.019191],[-13.7307091,12.01909],[-13.7305271,12.01909],[-13.7301441,12.019186],[-13.7290581,12.018941],[-13.7288301,12.018946],[-13.7282181,12.019084],[-13.7277761,12.019116],[-13.7268341,12.019068],[-13.7261691,12.018914],[-13.7254981,12.018643],[-13.7251091,12.01843],[-13.7249231,12.018408],[-13.7245721,12.018515],[-13.7239601,12.019058],[-13.7235291,12.019297],[-13.7234171,12.01942],[-13.7233691,12.019558],[-13.7234191,12.019856],[-13.7233391,12.020096],[-13.7231441,12.020299],[-13.7224261,12.020344],[-13.7221521,12.02045],[-13.7219041,12.02045],[-13.7217531,12.020335],[-13.7215971,12.020021],[-13.7211441,12.019638],[-13.7208781,12.019553],[-13.7204415,12.0195549],[-13.7202073,12.0194246],[-13.7200531,12.019393],[-13.7199471,12.019297],[-13.7198461,12.019084],[-13.7197121,12.01909],[-13.7196011,12.019249],[-13.7189091,12.019207],[-13.7188021,12.019074],[-13.7187171,12.019047],[-13.7186051,12.019052],[-13.7184141,12.01918],[-13.7183181,12.01918],[-13.7181001,12.018919],[-13.7177541,12.018994],[-13.7176261,12.018909],[-13.7175521,12.018909],[-13.7173391,12.019047],[-13.7169501,12.018919],[-13.7166951,12.018914],[-13.7162481,12.019047],[-13.7156571,12.019356],[-13.7149491,12.019329],[-13.7148161,12.01942],[-13.7146291,12.019436],[-13.7143581,12.019276],[-13.7139331,12.019138],[-13.7137041,12.019132],[-13.7131451,12.019249],[-13.7125591,12.019127],[-13.7121761,12.019095],[-13.7116071,12.019233],[-13.7113671,12.019223],[-13.7110161,12.019111],[-13.7102341,12.0191],[-13.7100901,12.019042],[-13.7099781,12.018914],[-13.7097441,12.018898],[-13.7092701,12.018632],[-13.7089671,12.018526],[-13.7086531,12.018648],[-13.7085461,12.018643],[-13.7084401,12.018547],[-13.7083711,12.018339],[-13.7082371,12.018265],[-13.7069821,12.017935],[-13.7064601,12.01742],[-13.7062681,12.01693],[-13.7059411,12.016528],[-13.7046131,12.015912],[-13.7042781,12.015566],[-13.7038571,12.015279],[-13.7031251,12.014302],[-13.7024691,12.013656],[-13.7023281,12.013372],[-13.7020621,12.013195],[-13.7018581,12.01316],[-13.7016541,12.012867],[-13.7015041,12.012504],[-13.7011851,12.012079],[-13.7007681,12.011689],[-13.7006621,12.011415],[-13.7001841,12.010919],[-13.6998651,12.010688],[-13.6994571,12.010653],[-13.6990941,12.010449],[-13.6988821,12.010077],[-13.6983571,12.009479],[-13.6977271,12.009084],[-13.6966965,12.0083937],[-13.6963489,12.0081969],[-13.7060271,11.955256],[-13.7074051,11.922115],[-13.7126561,11.880333],[-13.7098501,11.8616614],[-13.7054311,11.832252],[-13.7067121,11.801462],[-13.7067781,11.801201],[-13.7071031,11.800819],[-13.7071521,11.800664],[-13.7071162,11.8003471],[-13.7071821,11.799501],[-13.7070911,11.799319],[-13.7070731,11.798554],[-13.7070301,11.798395],[-13.7068591,11.79823],[-13.7066691,11.798187],[-13.7064001,11.79834],[-13.7059601,11.798695],[-13.7058621,11.798726],[-13.7056591,11.798682],[-13.7049791,11.798019],[-13.7048731,11.797767],[-13.7048001,11.797417],[-13.7045231,11.796733],[-13.7045561,11.796603],[-13.7049791,11.796375],[-13.7051501,11.796212],[-13.7053781,11.796172],[-13.7058501,11.796269],[-13.7060201,11.796221],[-13.7061911,11.796098],[-13.7063951,11.795765],[-13.7061981,11.79512],[-13.7057441,11.794439],[-13.7056541,11.794136],[-13.7056161,11.793751],[-13.7056381,11.793365],[-13.7057861,11.79317],[-13.7061431,11.792926],[-13.7062181,11.792681],[-13.7061721,11.792427],[-13.7059651,11.79191],[-13.7056171,11.791242],[-13.7054721,11.790709],[-13.7055181,11.790346],[-13.7054491,11.790111],[-13.7053581,11.790005],[-13.7052341,11.789723],[-13.7052601,11.789416],[-13.7052291,11.789305],[-13.7049001,11.788781],[-13.7048901,11.788696],[-13.7049331,11.788395],[-13.7050171,11.788178],[-13.7051231,11.788035],[-13.7055361,11.787813],[-13.7056571,11.787617],[-13.7057471,11.787374],[-13.7057731,11.78712],[-13.7057261,11.786934],[-13.7055571,11.786707],[-13.7055731,11.786453],[-13.7056311,11.786326],[-13.7059321,11.786035],[-13.7059591,11.78594],[-13.7057891,11.785702],[-13.7053561,11.7853],[-13.7053451,11.785062],[-13.7056411,11.784612],[-13.7056571,11.784257],[-13.7054821,11.783853],[-13.7054601,11.783614],[-13.7052551,11.783189],[-13.7051231,11.782686],[-13.7046251,11.782379],[-13.7045461,11.782236],[-13.7046041,11.782115],[-13.7052391,11.781591],[-13.7056241,11.781435],[-13.7056871,11.781333],[-13.7056921,11.781225],[-13.7054261,11.780913],[-13.7052081,11.780787],[-13.7048431,11.780675],[-13.7045991,11.780691],[-13.7039541,11.780866],[-13.7037101,11.780861],[-13.7036361,11.780765],[-13.7035831,11.780607],[-13.7035891,11.780469],[-13.7036841,11.780104],[-13.7036701,11.779973],[-13.7036101,11.779887],[-13.7036251,11.779485],[-13.7034461,11.778797],[-13.7035251,11.778691],[-13.7037951,11.778591],[-13.7038421,11.778432],[-13.7037791,11.778189],[-13.7034671,11.777914],[-13.7034831,11.777713],[-13.7038211,11.777353],[-13.7038321,11.777231],[-13.7038321,11.77712],[-13.7035931,11.776874],[-13.7035541,11.776625],[-13.7036691,11.775364],[-13.7034211,11.775058],[-13.7023891,11.77438],[-13.7021591,11.774179],[-13.7019781,11.77395],[-13.7019681,11.773568],[-13.7020671,11.773117],[-13.7021711,11.772919],[-13.7022811,11.772115],[-13.7022291,11.771972],[-13.7022021,11.771644],[-13.7020591,11.771469],[-13.7019541,11.771088],[-13.7018161,11.770993],[-13.7015141,11.770924],[-13.7013771,11.770829],[-13.7012451,11.770676],[-13.7012081,11.770549],[-13.7012341,11.770215],[-13.7015041,11.76993],[-13.7016606,11.7695794],[-13.7016536,11.7694214],[-13.7016295,11.7693042],[-13.7016472,11.7692226],[-13.7017421,11.7691393],[-13.7018333,11.7690396],[-13.7018955,11.7689705],[-13.7020039,11.7689445],[-13.7021121,11.769009],[-13.7022661,11.768972],[-13.7024031,11.768813],[-13.7024301,11.768692],[-13.7023561,11.768157],[-13.7024241,11.768041],[-13.7028371,11.767909],[-13.7028791,11.767792],[-13.7028851,11.767485],[-13.7031021,11.767311],[-13.7031701,11.767194],[-13.7031651,11.766819],[-13.7033451,11.766644],[-13.7032291,11.766475],[-13.7031921,11.766269],[-13.7032761,11.765919],[-13.7034461,11.765586],[-13.7034141,11.765411],[-13.7035041,11.765321],[-13.7037001,11.764956],[-13.7039541,11.764777],[-13.7041651,11.764501],[-13.7043821,11.764401],[-13.7046201,11.764369],[-13.7048161,11.764523],[-13.7049901,11.764528],[-13.7050591,11.764491],[-13.7052081,11.764591],[-13.7053341,11.764618],[-13.7054931,11.764496],[-13.7055301,11.764348],[-13.7055881,11.764311],[-13.7058791,11.7643],[-13.7061231,11.764099],[-13.7062661,11.763856],[-13.7063501,11.76383],[-13.7064401,11.763718],[-13.7065411,11.763443],[-13.7067681,11.76311],[-13.7068261,11.762676],[-13.7069691,11.762475],[-13.7074401,11.762068],[-13.7074111,11.761252],[-13.7075141,11.761026],[-13.7077031,11.760923],[-13.7079571,11.760208],[-13.7082671,11.759935],[-13.7088001,11.759846],[-13.7091161,11.759703],[-13.7093361,11.75955],[-13.7095071,11.758996],[-13.7096601,11.758815],[-13.7096991,11.75827],[-13.7096331,11.758096],[-13.7094431,11.756314],[-13.7098191,11.755919],[-13.7100451,11.75575],[-13.7100921,11.755467],[-13.7101861,11.755373],[-13.7103931,11.755354],[-13.7104871,11.755223],[-13.7105061,11.754941],[-13.7107311,11.754809],[-13.7107691,11.754621],[-13.7106941,11.754292],[-13.7106941,11.753962],[-13.7108911,11.753407],[-13.7108911,11.753295],[-13.7110441,11.752988],[-13.7109571,11.752382],[-13.7106721,11.75199],[-13.7096611,11.751389],[-13.7089271,11.750905],[-13.7086491,11.750667],[-13.7081566,11.7504137],[-13.7081261,11.7466563],[-13.7081668,11.7074122],[-13.7087804,11.7071801],[-13.709335,11.7067903],[-13.7102557,11.7061232],[-13.7145247,11.704997],[-13.7154871,11.7047795],[-13.7165074,11.7044916],[-13.7169762,11.7043824],[-13.7173828,11.7042542],[-13.7176918,11.7036859],[-13.7178801,11.703286],[-13.7179221,11.703374],[-13.7180331,11.703339],[-13.7185551,11.70354],[-13.7189381,11.703857],[-13.7192481,11.704245],[-13.7194841,11.704638],[-13.7199181,11.705019],[-13.7199851,11.705234],[-13.7199041,11.705627],[-13.7200011,11.705745],[-13.7202021,11.705844],[-13.7204471,11.705858],[-13.7210441,11.705694],[-13.7220461,11.705782],[-13.7223421,11.705652],[-13.7224141,11.705553],[-13.7224251,11.705447],[-13.7225221,11.705352],[-13.7227671,11.705204],[-13.7229361,11.705153],[-13.7232761,11.705206],[-13.7233681,11.70529],[-13.7234171,11.705419],[-13.7235671,11.705502],[-13.7242281,11.70556],[-13.7243551,11.705465],[-13.7244681,11.705278],[-13.7246781,11.705206],[-13.7250481,11.705176],[-13.7256051,11.704874],[-13.7257661,11.70483],[-13.7261111,11.704846],[-13.7265381,11.704673],[-13.7267971,11.704661],[-13.7271001,11.704717],[-13.7272531,11.704643],[-13.7275691,11.704326],[-13.7275391,11.704019],[-13.7275831,11.703744],[-13.7278021,11.703325],[-13.7279411,11.703224],[-13.7284401,11.703069],[-13.7287801,11.702907],[-13.7293831,11.702373],[-13.7300621,11.702272],[-13.7304161,11.702325],[-13.7307251,11.702195],[-13.7309891,11.70226],[-13.7313241,11.702101],[-13.7315601,11.701826],[-13.7316781,11.701433],[-13.7316131,11.701299],[-13.7315111,11.701223],[-13.7310401,11.701107],[-13.7310051,11.700968],[-13.7310881,11.70073],[-13.7313221,11.700553],[-13.7315851,11.700271],[-13.7317191,11.70025],[-13.7319081,11.70031],[-13.7319851,11.70028],[-13.7321331,11.700088],[-13.7323361,11.699926],[-13.7323871,11.699839],[-13.7322811,11.699686],[-13.7322991,11.699432],[-13.7323291,11.699344],[-13.7324731,11.699192],[-13.7327361,11.699094],[-13.7329531,11.69912],[-13.7333831,11.699268],[-13.7334681,11.699219],[-13.7334941,11.699171],[-13.7334451,11.699025],[-13.7332881,11.698778],[-13.7332491,11.698609],[-13.7333131,11.698401],[-13.7334871,11.698283],[-13.7335081,11.698221],[-13.7333131,11.698032],[-13.7332971,11.697856],[-13.7335051,11.69753],[-13.7337909,11.6974416],[-13.7339878,11.6973363],[-13.7341026,11.6973521],[-13.7342061,11.6973825],[-13.7342949,11.6973413],[-13.7344051,11.6972058],[-13.7346269,11.6968977],[-13.7346618,11.6967997],[-13.7346747,11.6967191],[-13.7346227,11.6965754],[-13.7346792,11.6964562],[-13.7348442,11.6963427],[-13.7352216,11.6962166],[-13.7353887,11.6961284],[-13.7355121,11.6960556],[-13.7355563,11.6959655],[-13.7355453,11.6958395],[-13.7355692,11.6957475],[-13.735666,11.6956546],[-13.7357545,11.6955855],[-13.7358393,11.6954809],[-13.7358538,11.6953454],[-13.7358028,11.695181],[-13.7357446,11.6950864],[-13.7357012,11.6949625],[-13.7356604,11.694834],[-13.7357205,11.6947132],[-13.7359139,11.6945761],[-13.7360466,11.6944742],[-13.7361881,11.694369],[-13.7365321,11.694297],[-13.7368465,11.6943376],[-13.7369921,11.6943739],[-13.737103,11.6944314],[-13.7372768,11.6945982],[-13.7374043,11.6946651],[-13.7375166,11.6947183],[-13.7376065,11.6947308],[-13.7376852,11.6947153],[-13.7377524,11.6946678],[-13.7377979,11.6945758],[-13.7378869,11.6943584],[-13.7379534,11.6942214],[-13.7379631,11.6940739],[-13.7379746,11.6939961],[-13.7379849,11.6939272],[-13.7380349,11.6938849],[-13.7381043,11.6938828],[-13.7381705,11.6939346],[-13.7382191,11.6940198],[-13.7382808,11.6940498],[-13.7383576,11.6940416],[-13.7384051,11.6940071],[-13.7384417,11.6939604],[-13.7384609,11.6938399],[-13.7384444,11.693639],[-13.7384275,11.6934998],[-13.7384011,11.6934136],[-13.7383785,11.693268],[-13.7383866,11.6931737],[-13.7384291,11.6931176],[-13.7384912,11.693085],[-13.7385575,11.6930976],[-13.7386499,11.6931449],[-13.7387179,11.6931437],[-13.7387637,11.6931278],[-13.7388544,11.6930458],[-13.7389327,11.6928773],[-13.7389432,11.6927564],[-13.7389188,11.6926811],[-13.7388907,11.6926151],[-13.7388253,11.6925014],[-13.73881,11.6924223],[-13.7388056,11.6923585],[-13.7388466,11.692312],[-13.7389091,11.6922808],[-13.7391072,11.6922599],[-13.7391847,11.6922415],[-13.7393541,11.6922046],[-13.7394905,11.6921719],[-13.7395798,11.6921692],[-13.7396376,11.6922227],[-13.7397076,11.6924411],[-13.7397404,11.6925147],[-13.7398001,11.6925695],[-13.7398853,11.6925988],[-13.73996,11.6925961],[-13.7400262,11.6925639],[-13.7401005,11.6924861],[-13.7403395,11.692275],[-13.7403779,11.6922523],[-13.7404424,11.6922317],[-13.740513,11.6922285],[-13.7405841,11.692249],[-13.7406735,11.6923833],[-13.7407329,11.6924342],[-13.7408001,11.692435],[-13.7408909,11.6924061],[-13.7409423,11.6923674],[-13.7409743,11.6923016],[-13.7409717,11.6922386],[-13.7409696,11.6921652],[-13.740806,11.6919089],[-13.740776,11.6918392],[-13.7407691,11.6917883],[-13.7408148,11.6917296],[-13.7408668,11.6917108],[-13.7409295,11.6917176],[-13.7410004,11.6917418],[-13.7411849,11.6918444],[-13.7413963,11.6920373],[-13.7414596,11.6921733],[-13.7415572,11.6923932],[-13.7416169,11.6925214],[-13.7416721,11.6925827],[-13.7417509,11.6926175],[-13.7419015,11.6926441],[-13.7420921,11.692678],[-13.7423091,11.692777],[-13.7424329,11.6928056],[-13.7425354,11.6928031],[-13.7426088,11.6927658],[-13.7426694,11.692693],[-13.7427055,11.6925952],[-13.7427167,11.6924989],[-13.7427219,11.6923651],[-13.7427214,11.6922344],[-13.742746,11.692164],[-13.7428239,11.6920984],[-13.7429172,11.6920781],[-13.7430409,11.6920591],[-13.74314,11.6920407],[-13.7432437,11.6919985],[-13.7433923,11.6919549],[-13.7434873,11.6919371],[-13.7438871,11.691889],[-13.7442631,11.691775],[-13.7444881,11.691627],[-13.7449171,11.691227],[-13.7453061,11.690769],[-13.7454081,11.690711],[-13.7456131,11.690724],[-13.7458271,11.6906232],[-13.7460301,11.690446],[-13.7463491,11.689947],[-13.7468351,11.689059],[-13.7472272,11.6886905],[-13.7473495,11.6885853],[-13.7476019,11.6884327],[-13.7479927,11.6882427],[-13.7479677,11.6884976],[-13.7480257,11.6887052],[-13.7481506,11.6888962],[-13.7483331,11.6890242],[-13.7485041,11.689072],[-13.7487056,11.6890879],[-13.7489703,11.6890539],[-13.7493032,11.6889688],[-13.7496342,11.6888186],[-13.7499663,11.6886754],[-13.7503603,11.6884341],[-13.7509954,11.6879967],[-13.7513232,11.6878008],[-13.7515034,11.6877204],[-13.7516451,11.687722],[-13.7519356,11.6878323],[-13.7523336,11.6879833],[-13.7528598,11.6883006],[-13.7532222,11.6885357],[-13.7537101,11.6889055],[-13.7541666,11.6893087],[-13.7545115,11.6895561],[-13.7547465,11.6897085],[-13.7549431,11.6897589],[-13.755089,11.6897497],[-13.7552215,11.689684],[-13.755302,11.6895953],[-13.7553066,11.6894308],[-13.7552508,11.6891981],[-13.755155,11.6889565],[-13.7551188,11.6887773],[-13.7551502,11.6882943],[-13.755203,11.6882197],[-13.7552864,11.688174],[-13.7555091,11.6881189],[-13.7556904,11.6880637],[-13.7559253,11.6879789],[-13.7561426,11.6879169],[-13.7566587,11.6878433],[-13.7573582,11.6877288],[-13.757635,11.6876429],[-13.7577991,11.6875568],[-13.7579013,11.6874496],[-13.7579346,11.6873175],[-13.7579453,11.6871074],[-13.7579118,11.6868901],[-13.7578445,11.6865526],[-13.7575293,11.6854555],[-13.757488,11.6852748],[-13.7574864,11.6851828],[-13.7575564,11.685016],[-13.757646,11.6849139],[-13.7578517,11.6847951],[-13.7581256,11.6846596],[-13.7584734,11.6844855],[-13.7586462,11.6844161],[-13.7588489,11.6843738],[-13.7590501,11.684357],[-13.7594398,11.6844098],[-13.7598824,11.6844626],[-13.7603287,11.6844918],[-13.7607925,11.6845517],[-13.7612471,11.6846223],[-13.7621097,11.6848015],[-13.7627103,11.6849168],[-13.7631759,11.6849995],[-13.763435,11.6850205],[-13.7637292,11.6850573],[-13.7642442,11.6850793],[-13.7647117,11.6850849],[-13.7650634,11.6850977],[-13.7652814,11.6851377],[-13.7655207,11.6852233],[-13.7658034,11.6853512],[-13.7660493,11.6855051],[-13.7661708,11.6856186],[-13.7662508,11.6857536],[-13.7662604,11.6858991],[-13.7662178,11.6860622],[-13.7661003,11.6861823],[-13.7652755,11.6868061],[-13.7649005,11.6870659],[-13.7643692,11.6873682],[-13.7641286,11.6875707],[-13.764016,11.6877335],[-13.7639344,11.6879198],[-13.7639462,11.6880944],[-13.7640342,11.6882439],[-13.7641688,11.6883072],[-13.7643722,11.6883755],[-13.7645712,11.6883849],[-13.7647085,11.6883201],[-13.7648619,11.688251],[-13.765032,11.6882158],[-13.765169,11.6882329],[-13.7653147,11.6881743],[-13.7655472,11.68807],[-13.7657095,11.6879686],[-13.7658173,11.6878549],[-13.7660357,11.6876448],[-13.7666236,11.6869729],[-13.7668173,11.6868053],[-13.7669117,11.6866761],[-13.7669742,11.6865369],[-13.7670769,11.686404],[-13.7675688,11.6857604],[-13.7676329,11.6856533],[-13.7676174,11.6855214],[-13.7675777,11.6853856],[-13.7674881,11.6852067],[-13.7672705,11.6849115],[-13.7668478,11.6843927],[-13.7667346,11.6842244],[-13.7667253,11.6841458],[-13.7667872,11.6840663],[-13.7669288,11.6839922],[-13.7672118,11.6838514],[-13.7674621,11.6837844],[-13.7681651,11.683672],[-13.768437,11.6835932],[-13.7687506,11.6834881],[-13.7690982,11.6833363],[-13.7694541,11.6831645],[-13.7700137,11.6828612],[-13.7701436,11.682794],[-13.7702439,11.682702],[-13.7703611,11.6825426],[-13.7704775,11.6824381],[-13.7712553,11.6820708],[-13.7717832,11.6818077],[-13.7719616,11.6817543],[-13.7721501,11.6817349],[-13.7723271,11.6817541],[-13.7724556,11.6818413],[-13.7725358,11.6819986],[-13.7725903,11.6821625],[-13.7725916,11.6823275],[-13.7724784,11.6824704],[-13.7722917,11.6827028],[-13.7712535,11.6836642],[-13.7711352,11.6838278],[-13.7710923,11.6839815],[-13.7711129,11.6841708],[-13.7712092,11.684403],[-13.7713602,11.6845701],[-13.7716191,11.684778],[-13.7720624,11.6851477],[-13.7723521,11.6852953],[-13.7725468,11.6853712],[-13.7727284,11.6853972],[-13.7729025,11.6854059],[-13.7731482,11.6853397],[-13.7734228,11.6852328],[-13.7737122,11.6850592],[-13.7739276,11.6848866],[-13.7743074,11.6844989],[-13.7745062,11.6842938],[-13.7746899,11.6840618],[-13.7749015,11.683733],[-13.7750305,11.6834982],[-13.7752494,11.6829723],[-13.7753296,11.6827895],[-13.7754208,11.6826797],[-13.7755801,11.682588],[-13.7757268,11.6825846],[-13.775862,11.6826419],[-13.7760235,11.6828347],[-13.7763167,11.6833629],[-13.7768915,11.6845932],[-13.7769773,11.6848117],[-13.7770374,11.685024],[-13.7770848,11.6852583],[-13.7770916,11.6855283],[-13.7770033,11.6857466],[-13.7768638,11.6858839],[-13.776656,11.6859935],[-13.7763591,11.686099],[-13.7758776,11.6861671],[-13.7753953,11.686212],[-13.7750783,11.6862299],[-13.7747237,11.6862482],[-13.7744863,11.6862727],[-13.7743407,11.6863097],[-13.7742154,11.6864008],[-13.7741497,11.6865406],[-13.7741588,11.6867037],[-13.7741999,11.6869154],[-13.7742409,11.6871363],[-13.7743251,11.6874423],[-13.7745891,11.6883183],[-13.7747516,11.6889429],[-13.7748626,11.6894669],[-13.7749828,11.6898606],[-13.7751244,11.6902068],[-13.775229,11.6904513],[-13.7753999,11.6907011],[-13.7755648,11.6908747],[-13.7757866,11.6910102],[-13.776028,11.6911206],[-13.776244,11.6912022],[-13.7763879,11.69127],[-13.7765049,11.6913832],[-13.7766696,11.6914773],[-13.7768211,11.6915182],[-13.7769831,11.6915124],[-13.7771613,11.6914762],[-13.7773325,11.6913859],[-13.7773981,11.6912353],[-13.7775223,11.6910901],[-13.7776545,11.6909346],[-13.7777919,11.6907426],[-13.7778132,11.6907053],[-13.7779354,11.6904918],[-13.7782604,11.6899728],[-13.7784143,11.6896557],[-13.7785533,11.6893723],[-13.7786608,11.6891664],[-13.7787458,11.6888993],[-13.7789505,11.6882232],[-13.7790496,11.6880233],[-13.779189,11.687804],[-13.7794389,11.6875805],[-13.7796219,11.6874334],[-13.7798352,11.6872758],[-13.7814036,11.6866186],[-13.7816378,11.6865251],[-13.7818793,11.6864723],[-13.7824683,11.6864313],[-13.7826863,11.6864269],[-13.782885,11.6864941],[-13.7830166,11.6866175],[-13.7830896,11.6867642],[-13.7831083,11.686953],[-13.783156,11.687239],[-13.7832515,11.6879671],[-13.7833343,11.6881186],[-13.7834302,11.6882179],[-13.7836348,11.6882539],[-13.7846351,11.688485],[-13.7859871,11.689247],[-13.7864135,11.6893872],[-13.7869233,11.68965],[-13.7871674,11.6897838],[-13.7876188,11.6901054],[-13.7877261,11.690215],[-13.7878354,11.6903325],[-13.7878931,11.690452],[-13.7879186,11.6905539],[-13.7879002,11.690658],[-13.7878538,11.6907975],[-13.7878228,11.6909181],[-13.7878061,11.6910262],[-13.7878075,11.6911165],[-13.7878303,11.6912728],[-13.7878321,11.691383],[-13.7878182,11.6914971],[-13.7877926,11.6915885],[-13.7877895,11.6917002],[-13.7878063,11.6918071],[-13.7878767,11.6919255],[-13.7880141,11.692077],[-13.7881045,11.6921183],[-13.788147,11.6921363],[-13.7882203,11.69214],[-13.7882969,11.6921278],[-13.7883835,11.6920867],[-13.7884892,11.6920768],[-13.7887211,11.692084],[-13.7892741,11.691897],[-13.7896321,11.691832],[-13.7901341,11.691846],[-13.7904781,11.69193],[-13.7911721,11.691995],[-13.7922371,11.692381],[-13.7929251,11.692567],[-13.7936691,11.692851],[-13.7941161,11.692948],[-13.7943761,11.693065],[-13.7950561,11.69326],[-13.7956981,11.693544],[-13.7967111,11.693785],[-13.7970311,11.693785],[-13.7975201,11.693663],[-13.7978301,11.693644],[-13.7980681,11.693672],[-13.7981871,11.693774],[-13.7982561,11.69395],[-13.7982441,11.694195],[-13.7978471,11.694776],[-13.7971481,11.695606],[-13.7966731,11.696084],[-13.7955281,11.697086],[-13.7953611,11.697377],[-13.7953611,11.697516],[-13.7953981,11.697618],[-13.7958111,11.697749],[-13.7962931,11.697712],[-13.7975941,11.697319],[-13.7982481,11.697209],[-13.7986891,11.697295],[-13.7988571,11.697397],[-13.7989551,11.697495],[-13.7990291,11.697708],[-13.7990941,11.69817],[-13.7990861,11.698464],[-13.7989591,11.699172],[-13.7988631,11.699375],[-13.7985095,11.7004588],[-13.79834,11.7007726],[-13.7981675,11.7011253],[-13.7979213,11.7016255],[-13.7977097,11.7020142],[-13.7975192,11.7023012],[-13.797394,11.7025333],[-13.7972601,11.7028325],[-13.7971478,11.703179],[-13.7970338,11.7033529],[-13.7968954,11.7034333],[-13.7967065,11.7034292],[-13.7959949,11.703304],[-13.7958627,11.7032334],[-13.7957214,11.7030946],[-13.7956527,11.7028896],[-13.7955886,11.7025487],[-13.7954791,11.701237],[-13.7955081,11.700681],[-13.7954181,11.700276],[-13.7953491,11.700198],[-13.7950851,11.700149],[-13.7948471,11.700194],[-13.7946421,11.700348],[-13.7942501,11.700791],[-13.7941471,11.70101],[-13.7941091,11.701209],[-13.7941211,11.701414],[-13.7943993,11.70268],[-13.7943832,11.7028381],[-13.7943191,11.7030757],[-13.7941434,11.7038728],[-13.7941254,11.7040584],[-13.7941791,11.7042293],[-13.7942622,11.7043612],[-13.794343,11.7044817],[-13.7945787,11.7046026],[-13.7948081,11.7046671],[-13.7958445,11.7048497],[-13.7967293,11.704976],[-13.7973671,11.705089],[-13.7976228,11.7051344],[-13.7979021,11.705186],[-13.7983173,11.7052879],[-13.7985491,11.705345],[-13.7988411,11.705479],[-13.7991691,11.705691],[-13.7994521,11.705954],[-13.7996991,11.706397],[-13.7997891,11.706904],[-13.7997531,11.707245],[-13.7995871,11.707586],[-13.7994221,11.707775],[-13.7990471,11.707996],[-13.7967191,11.708514],[-13.7963984,11.7085837],[-13.7953049,11.7088517],[-13.7950856,11.7089091],[-13.7949017,11.7089687],[-13.7946656,11.7090328],[-13.794374,11.7090777],[-13.7938303,11.7091506],[-13.7933941,11.7092035],[-13.7930836,11.7092627],[-13.7928164,11.7093535],[-13.7926855,11.709458],[-13.792576,11.7095512],[-13.7925083,11.7097087],[-13.7924932,11.710097],[-13.7925931,11.710805],[-13.7927861,11.712081],[-13.7927861,11.712697],[-13.7927671,11.713012],[-13.79232,11.7135842],[-13.7921888,11.71393],[-13.7921472,11.7141789],[-13.7921708,11.7143298],[-13.7922525,11.714445],[-13.79242,11.7145488],[-13.7926488,11.7146014],[-13.7928704,11.7146417],[-13.7933267,11.7146397],[-13.7936625,11.714698],[-13.7940574,11.7148558],[-13.7942221,11.7149866],[-13.7944931,11.715317],[-13.7948271,11.715917],[-13.7951671,11.716783],[-13.7952521,11.717141],[-13.7954441,11.717533],[-13.7957591,11.717725],[-13.7961891,11.717725],[-13.7964271,11.717668],[-13.7968321,11.717443],[-13.7973521,11.716993],[-13.7980651,11.716589],[-13.7984761,11.716197],[-13.7987771,11.715985],[-13.7989761,11.715902],[-13.7994071,11.715895],[-13.8001321,11.715516],[-13.8011101,11.715344],[-13.8016091,11.715172],[-13.8019361,11.715025],[-13.8026931,11.714539],[-13.8029381,11.714166],[-13.8030161,11.713943],[-13.8030161,11.713789],[-13.8029321,11.713648],[-13.8025471,11.713262],[-13.8018791,11.712654],[-13.8014701,11.712081],[-13.8014161,11.711914],[-13.8014631,11.711733],[-13.8019931,11.711063],[-13.8025581,11.710478],[-13.8034781,11.709648],[-13.8043811,11.708961],[-13.8047251,11.708875],[-13.8049581,11.708896],[-13.8055921,11.709771],[-13.8059191,11.709983],[-13.8061271,11.71],[-13.8062911,11.709889],[-13.8063401,11.709546],[-13.8062501,11.708331],[-13.8062871,11.708245],[-13.8064951,11.708127],[-13.8067081,11.708102],[-13.8068551,11.708139],[-13.8070151,11.708209],[-13.8074031,11.708618],[-13.8079921,11.7093],[-13.8082161,11.709622],[-13.8091291,11.710623],[-13.8096171,11.711092],[-13.8098291,11.711239],[-13.8100091,11.711239],[-13.8102721,11.711092],[-13.8108101,11.710564],[-13.8112761,11.709967],[-13.8119461,11.708945],[-13.8126161,11.708095],[-13.8127901,11.70781],[-13.8130721,11.707547],[-13.8132841,11.707271],[-13.8137091,11.706884],[-13.8143591,11.706156],[-13.8147271,11.705956],[-13.8149851,11.705894],[-13.8152381,11.70589],[-13.8154461,11.705939],[-13.8161091,11.70623],[-13.8176791,11.707109],[-13.8186321,11.707575],[-13.8193761,11.707751],[-13.8196951,11.707775],[-13.8199081,11.707762],[-13.8202601,11.7076],[-13.8203801,11.707466],[-13.8203701,11.707186],[-13.8203001,11.706961],[-13.8200701,11.706628],[-13.8195421,11.706339],[-13.8187181,11.70617],[-13.8183521,11.70605],[-13.8180981,11.705881],[-13.8179921,11.705691],[-13.8180771,11.705134],[-13.8183441,11.704881],[-13.8191401,11.70467],[-13.8200561,11.704184],[-13.8204301,11.704162],[-13.8206341,11.704219],[-13.8208451,11.704402],[-13.8210981,11.704868],[-13.8213761,11.706275],[-13.8218131,11.707203],[-13.8229511,11.708867],[-13.8243951,11.710656],[-13.8254321,11.711648],[-13.8260421,11.712101],[-13.8264301,11.71231],[-13.8266381,11.712371],[-13.8271951,11.712433],[-13.8282871,11.71242],[-13.8290221,11.712645],[-13.8292231,11.712809],[-13.8292961,11.713083],[-13.8292841,11.713414],[-13.8289691,11.714015],[-13.8287761,11.714248],[-13.8283351,11.714604],[-13.8278851,11.71489],[-13.8267531,11.715389],[-13.8262991,11.715659],[-13.8262191,11.715939],[-13.8264061,11.716788],[-13.8266061,11.717364],[-13.8268921,11.717826],[-13.8271861,11.718002],[-13.8274111,11.718002],[-13.8275671,11.717945],[-13.8276531,11.717855],[-13.8278611,11.717466],[-13.8281021,11.717209],[-13.8283481,11.717131],[-13.8285341,11.717123],[-13.8288181,11.71718],[-13.8291041,11.717336],[-13.8292641,11.717524],[-13.8298081,11.71837],[-13.8301301,11.718779],[-13.8304171,11.719061],[-13.8305881,11.719114],[-13.8307641,11.719073],[-13.8309321,11.718951],[-13.8311531,11.718632],[-13.8314721,11.717953],[-13.8316721,11.717753],[-13.8319661,11.717675],[-13.8321421,11.717695],[-13.8322851,11.717773],[-13.8324981,11.718035],[-13.8325721,11.718468],[-13.8322761,11.720383],[-13.8323041,11.721017],[-13.8323821,11.721404],[-13.8326821,11.722328],[-13.8334731,11.725187],[-13.8333681,11.725546],[-13.8326921,11.72606],[-13.8309451,11.726933],[-13.8303961,11.727236],[-13.8301141,11.727441],[-13.8298391,11.727455],[-13.8289731,11.727624],[-13.8285431,11.72775],[-13.8263361,11.727477],[-13.8258821,11.727538],[-13.8252031,11.727828],[-13.8245121,11.728274],[-13.8235391,11.72863],[-13.8233801,11.728828],[-13.8233061,11.729026],[-13.8231791,11.729599],[-13.8231951,11.730727],[-13.8232821,11.731589],[-13.8236831,11.732892],[-13.8237751,11.733399],[-13.8237891,11.733526],[-13.8237041,11.733878],[-13.8237121,11.734223],[-13.8237381,11.734476],[-13.8238711,11.734663],[-13.8241131,11.73484],[-13.8244531,11.734975],[-13.8251881,11.734965],[-13.8253651,11.73503],[-13.8259651,11.735389],[-13.8262251,11.735626],[-13.8267191,11.736371],[-13.8267471,11.736625],[-13.8268251,11.736815],[-13.8274871,11.738069],[-13.8277901,11.738259],[-13.8280011,11.738203],[-13.8281281,11.738111],[-13.8281981,11.737914],[-13.8282051,11.737527],[-13.8281141,11.736569],[-13.8278461,11.735681],[-13.8279231,11.735512],[-13.8280571,11.735407],[-13.8286701,11.735484],[-13.8290571,11.735463],[-13.8297691,11.73559],[-13.8302131,11.735597],[-13.8305081,11.735681],[-13.8306991,11.735822],[-13.8307971,11.735991],[-13.8308251,11.736702],[-13.8306911,11.737407],[-13.8306841,11.737836],[-13.8307341,11.738344],[-13.8309521,11.739407],[-13.8310081,11.740858],[-13.8311141,11.74114],[-13.8312411,11.741302],[-13.8313611,11.741344],[-13.8315371,11.741309],[-13.8321771,11.741069],[-13.8325231,11.740865],[-13.8328821,11.74052],[-13.8333891,11.739935],[-13.8335791,11.739837],[-13.8338191,11.739935],[-13.8338891,11.740097],[-13.8339031,11.740273],[-13.8338401,11.740647],[-13.8336711,11.741034],[-13.8334031,11.741492],[-13.8332911,11.741816],[-13.8333331,11.741985],[-13.8334671,11.742084],[-13.8337271,11.742168],[-13.8344641,11.742308],[-13.8350961,11.742315],[-13.8355051,11.742236],[-13.8360591,11.741984],[-13.8365461,11.741895],[-13.8368941,11.7419549],[-13.8370765,11.7420263],[-13.8371516,11.7420631],[-13.8372696,11.7420526],[-13.8374091,11.7420053],[-13.8375217,11.7419896],[-13.8376451,11.7420211],[-13.8377685,11.7420736],[-13.8379563,11.7421104],[-13.8381762,11.7421524],[-13.83838,11.7422259],[-13.8385088,11.7422994],[-13.8385732,11.7423677],[-13.8388307,11.7426146],[-13.839013,11.7427459],[-13.8392974,11.7429034],[-13.8395656,11.7430925],[-13.8398074,11.7432737],[-13.8401825,11.7435547],[-13.8404024,11.7437385],[-13.840558,11.7438488],[-13.8406331,11.7439486],[-13.8406867,11.7440799],[-13.8407511,11.7443373],[-13.8408209,11.7445894],[-13.8408745,11.7448205],[-13.8409335,11.744978],[-13.8409421,11.7451435],[-13.8411181,11.745146],[-13.8413711,11.745334],[-13.8415761,11.745411],[-13.8421401,11.745444],[-13.8428451,11.745203],[-13.8433471,11.745143],[-13.8436311,11.745031],[-13.8438871,11.74471],[-13.8442171,11.744575],[-13.8445381,11.744538],[-13.8446501,11.744394],[-13.8448731,11.744306],[-13.8452161,11.744084],[-13.8459471,11.74344],[-13.8464541,11.742749],[-13.8472231,11.741412],[-13.8476891,11.74084],[-13.8480701,11.740517],[-13.8482541,11.740439],[-13.8486181,11.74039],[-13.8487601,11.740406],[-13.8490471,11.740525],[-13.8492391,11.740783],[-13.8498651,11.741923],[-13.8506731,11.743853],[-13.8522421,11.745763],[-13.8528721,11.746367],[-13.8538011,11.747017],[-13.8540581,11.747143],[-13.8543831,11.747154],[-13.8545091,11.747065],[-13.8545461,11.746981],[-13.8545561,11.746697],[-13.8544981,11.746514],[-13.8542561,11.746188],[-13.8541831,11.746013],[-13.8541541,11.745792],[-13.8541831,11.745383],[-13.8543011,11.74488],[-13.8546571,11.744205],[-13.8548861,11.744107],[-13.8563871,11.744344],[-13.8571061,11.744316],[-13.8573351,11.744246],[-13.8579241,11.743915],[-13.8583901,11.743494],[-13.8582081,11.742868],[-13.8580201,11.742451],[-13.8570451,11.741142],[-13.8568571,11.740774],[-13.8567921,11.740239],[-13.8568531,11.740059],[-13.8570571,11.73976],[-13.8574421,11.739572],[-13.8577241,11.739609],[-13.8577891,11.739736],[-13.8577521,11.739999],[-13.8577801,11.740184],[-13.8578781,11.740286],[-13.8591141,11.740877],[-13.8597521,11.741036],[-13.8609381,11.741151],[-13.8614861,11.741122],[-13.8617641,11.740991],[-13.8618781,11.740791],[-13.8619441,11.740398],[-13.8619311,11.740202],[-13.8618371,11.739985],[-13.8613631,11.73929],[-13.8605941,11.738439],[-13.8603081,11.738018],[-13.8594821,11.736595],[-13.8591761,11.735667],[-13.8591181,11.735242],[-13.8591391,11.735111],[-13.8592571,11.734825],[-13.8594451,11.734669],[-13.8597481,11.734592],[-13.8602801,11.7346],[-13.8607381,11.734477],[-13.8616051,11.734052],[-13.8619271,11.733835],[-13.8620711,11.733684],[-13.8623161,11.733234],[-13.8625861,11.732392],[-13.8628111,11.732281],[-13.8633221,11.730723],[-13.8637431,11.729975],[-13.8637181,11.729758],[-13.8636821,11.729681],[-13.8635101,11.729566],[-13.8622461,11.729656],[-13.8616531,11.729627],[-13.8615021,11.729574],[-13.8609681,11.72917],[-13.8605151,11.728692],[-13.8601131,11.728365],[-13.8596131,11.727787],[-13.8593071,11.727121],[-13.8591691,11.726704],[-13.8590431,11.726539],[-13.8590311,11.726417],[-13.8588781,11.726122],[-13.8587441,11.726008],[-13.8587001,11.725882],[-13.8587011,11.725387],[-13.8589061,11.72414],[-13.8593561,11.722545],[-13.8592661,11.722279],[-13.8590811,11.722075],[-13.8587991,11.721862],[-13.8582601,11.721608],[-13.8575471,11.721344],[-13.8572681,11.721135],[-13.8564141,11.720726],[-13.8562091,11.720557],[-13.8559651,11.720517],[-13.8556461,11.720321],[-13.8553751,11.720301],[-13.8552841,11.720226],[-13.8550721,11.720191],[-13.8547251,11.720021],[-13.8544931,11.720077],[-13.8543361,11.720179],[-13.8539171,11.720631],[-13.8519991,11.722823],[-13.8517251,11.723285],[-13.8503881,11.728609],[-13.8501871,11.729174],[-13.8498971,11.729456],[-13.8496601,11.729509],[-13.8494271,11.729497],[-13.8489691,11.729272],[-13.8485761,11.728928],[-13.8479851,11.728157],[-13.8473181,11.727413],[-13.8469801,11.726926],[-13.8467351,11.72648],[-13.8466291,11.726271],[-13.8466171,11.726075],[-13.8465471,11.725913],[-13.8460881,11.72577],[-13.8459761,11.725696],[-13.8459511,11.725627],[-13.8461311,11.725268],[-13.8461131,11.725156],[-13.8457361,11.724547],[-13.8455401,11.724047],[-13.8453671,11.723119],[-13.8453561,11.722726],[-13.8455221,11.721918],[-13.8456551,11.721534],[-13.8458331,11.720611],[-13.8459311,11.719646],[-13.8459271,11.719184],[-13.8460621,11.718955],[-13.8463401,11.718885],[-13.8468431,11.719073],[-13.8474481,11.719384],[-13.8481751,11.719871],[-13.8492431,11.720398],[-13.8495251,11.720464],[-13.8496561,11.720435],[-13.8497171,11.720366],[-13.8498161,11.720039],[-13.8499791,11.718301],[-13.8499591,11.718198],[-13.8497501,11.717937],[-13.8494921,11.717765],[-13.8482251,11.717434],[-13.8474071,11.717348],[-13.8462131,11.717503],[-13.8459721,11.717466],[-13.8457021,11.717319],[-13.8456241,11.71709],[-13.8456411,11.716951],[-13.8457751,11.71671],[-13.8463481,11.716121],[-13.8480981,11.714661],[-13.8492351,11.71352],[-13.8502001,11.71282],[-13.8505661,11.712907],[-13.8507561,11.712805],[-13.8510061,11.71249],[-13.8512551,11.712502],[-13.8514061,11.712592],[-13.8515291,11.712874],[-13.8516971,11.713099],[-13.8519581,11.713206],[-13.8524901,11.713251],[-13.8532141,11.713267],[-13.8534471,11.713226],[-13.8538021,11.713083],[-13.8539701,11.712923],[-13.8540277,11.712743],[-13.8540681,11.712617],[-13.8539291,11.712273],[-13.8537741,11.712106],[-13.8526451,11.711304],[-13.8517781,11.710548],[-13.8511721,11.709881],[-13.8510501,11.709697],[-13.8510101,11.709521],[-13.8511121,11.709345],[-13.8522161,11.708135],[-13.8530051,11.707358],[-13.8537331,11.706761],[-13.8547591,11.706066],[-13.8559331,11.705027],[-13.8561941,11.704684],[-13.8562641,11.704549],[-13.8562601,11.704402],[-13.8562191,11.704304],[-13.8560271,11.704164],[-13.8551681,11.703968],[-13.8538831,11.703877],[-13.8535821,11.703809],[-13.8531591,11.703639],[-13.8528861,11.703419],[-13.8525761,11.702955],[-13.8521871,11.702128],[-13.8521221,11.701842],[-13.8521511,11.701687],[-13.8523591,11.70156],[-13.8528821,11.701494],[-13.8532221,11.7014],[-13.8539421,11.70109],[-13.8545021,11.700783],[-13.8551441,11.700272],[-13.8558271,11.699519],[-13.8558601,11.699415],[-13.8557761,11.698554],[-13.8554321,11.697162],[-13.8554021,11.696276],[-13.8552791,11.69586],[-13.8552951,11.695455],[-13.8554421,11.69516],[-13.8557571,11.695083],[-13.8560641,11.69514],[-13.8562521,11.695226],[-13.8565181,11.695471],[-13.8566241,11.695733],[-13.8568901,11.696142],[-13.8571561,11.696293],[-13.8574461,11.696317],[-13.8575811,11.696252],[-13.8577281,11.696121],[-13.8578381,11.695941],[-13.8579041,11.695545],[-13.8578301,11.692932],[-13.8578431,11.691811],[-13.8579941,11.690969],[-13.8584721,11.688937],[-13.8585741,11.687465],[-13.8586891,11.686978],[-13.8588691,11.686692],[-13.8592491,11.686406],[-13.8594991,11.686287],[-13.8597851,11.686164],[-13.8604721,11.685997],[-13.8613471,11.686197],[-13.8619311,11.686451],[-13.8623941,11.686827],[-13.8626881,11.687227],[-13.8627781,11.687436],[-13.8629951,11.68847],[-13.8630891,11.689521],[-13.8633141,11.690127],[-13.8635831,11.690417],[-13.8638701,11.690536],[-13.8641811,11.690486],[-13.8642751,11.690421],[-13.8643891,11.690221],[-13.8644521,11.689817],[-13.8646621,11.689064],[-13.8654301,11.683677],[-13.8655291,11.682746],[-13.8657591,11.681723],[-13.8667091,11.678453],[-13.8670381,11.67792],[-13.8675231,11.677367],[-13.8676781,11.676921],[-13.8676781,11.676727],[-13.8672501,11.675815],[-13.8669721,11.675418],[-13.8668691,11.675156],[-13.8668531,11.674768],[-13.8669091,11.674451],[-13.8669566,11.6743526],[-13.8670281,11.674205],[-13.8681441,11.672666],[-13.8690541,11.671203],[-13.8695101,11.670553],[-13.8700141,11.669632],[-13.8704001,11.668749],[-13.8705351,11.668288],[-13.8704671,11.667752],[-13.8702411,11.667169],[-13.8695776,11.6659525],[-13.8694407,11.6655811],[-13.8693608,11.6651398],[-13.8692975,11.664606],[-13.8691827,11.6641001],[-13.8690651,11.663795],[-13.8696291,11.663456],[-13.8698261,11.663394],[-13.8700441,11.663462],[-13.8702341,11.66334],[-13.8703161,11.66315],[-13.8703021,11.663089],[-13.8701801,11.662987],[-13.8701191,11.662742],[-13.8701461,11.66247],[-13.8703201,11.661995],[-13.8705741,11.661682],[-13.8712201,11.661376],[-13.8713491,11.661274],[-13.8714241,11.661165],[-13.8715601,11.660574],[-13.8716211,11.660458],[-13.8717771,11.660411],[-13.8720421,11.660465],[-13.8723891,11.660411],[-13.8727901,11.66054],[-13.8731341,11.660392],[-13.8730981,11.66009],[-13.8731401,11.659989],[-13.8730981,11.659896],[-13.8730751,11.659486],[-13.8730961,11.659432],[-13.8732991,11.659303],[-13.8734761,11.659262],[-13.8740471,11.659377],[-13.8742921,11.659343],[-13.8743601,11.659377],[-13.8744691,11.659588],[-13.8745031,11.659901],[-13.8745771,11.660071],[-13.8747131,11.660309],[-13.8749651,11.660608],[-13.8751681,11.661017],[-13.8753261,11.661212],[-13.8758151,11.661413],[-13.8760881,11.661406],[-13.8762251,11.661377],[-13.8763611,11.661197],[-13.8766781,11.661032],[-13.8770731,11.66101],[-13.8773521,11.661108],[-13.8774201,11.661182],[-13.8775451,11.661753],[-13.8776021,11.661854],[-13.8778501,11.662048],[-13.8781091,11.6621],[-13.8785931,11.661821],[-13.8787171,11.661809],[-13.8792631,11.661883],[-13.8794421,11.661871],[-13.8797521,11.661952],[-13.8804901,11.661592],[-13.8808001,11.661536],[-13.8809991,11.661319],[-13.8811541,11.661232],[-13.8812631,11.66125],[-13.8817381,11.661514],[-13.8819001,11.66152],[-13.8823261,11.661337],[-13.8829561,11.661466],[-13.8833401,11.661795],[-13.8833401,11.661865],[-13.8832101,11.662091],[-13.8832421,11.662259],[-13.8835391,11.662426],[-13.8835981,11.66249],[-13.8836091,11.66262],[-13.8837711,11.662798],[-13.8840031,11.662889],[-13.8840571,11.662879],[-13.8842021,11.662706],[-13.8845581,11.662474],[-13.8850161,11.662577],[-13.8851831,11.66255],[-13.8854741,11.662387],[-13.8857341,11.662431],[-13.8859381,11.662415],[-13.8863861,11.662269],[-13.8867151,11.662307],[-13.8868931,11.662205],[-13.8875661,11.662277],[-13.8879461,11.662384],[-13.8880431,11.662446],[-13.8881331,11.662857],[-13.8882841,11.663164],[-13.8888551,11.663844],[-13.8891141,11.663968],[-13.8892221,11.663957],[-13.8895621,11.663768],[-13.8898211,11.663779],[-13.8898901,11.663855],[-13.8901851,11.66463],[-13.8904931,11.66481],[-13.8907671,11.664896],[-13.8910041,11.664839],[-13.8911551,11.664954],[-13.8913781,11.664975],[-13.8915361,11.665097],[-13.8917081,11.665069],[-13.8919381,11.664839],[-13.8924631,11.664522],[-13.8928111,11.66438],[-13.8932041,11.664422],[-13.8939371,11.664623],[-13.8942251,11.664752],[-13.8948001,11.66522],[-13.8949011,11.665363],[-13.8950801,11.665946],[-13.8952671,11.66624],[-13.8956411,11.666593],[-13.8960441,11.666816],[-13.8962521,11.666895],[-13.8968921,11.666945],[-13.8977551,11.667161],[-13.8989191,11.667348],[-13.8990131,11.667441],[-13.8990701,11.667714],[-13.8989621,11.668527],[-13.8989841,11.668735],[-13.8990561,11.668865],[-13.8991851,11.668944],[-13.9000411,11.669052],[-13.9007961,11.669346],[-13.9012421,11.669289],[-13.9016941,11.669375],[-13.9018451,11.669468],[-13.9019251,11.669699],[-13.9020471,11.669792],[-13.9026431,11.670072],[-13.9029671,11.670353],[-13.9035281,11.670604],[-13.9038511,11.670597],[-13.9039881,11.67036],[-13.9044261,11.670245],[-13.9047281,11.670266],[-13.9051451,11.670446],[-13.9053571,11.670341],[-13.9054811,11.670375],[-13.9061081,11.67087],[-13.9062521,11.671021],[-13.9063381,11.67128],[-13.9064251,11.671352],[-13.9068061,11.671208],[-13.9069431,11.671223],[-13.9070071,11.671302],[-13.9070071,11.671424],[-13.9068421,11.671798],[-13.9067921,11.672078],[-13.9068201,11.672251],[-13.9065971,11.672459],[-13.9065401,11.672653],[-13.9066981,11.672768],[-13.9068951,11.672774],[-13.9073851,11.672948],[-13.9076171,11.673162],[-13.9077781,11.673403],[-13.9078941,11.67384],[-13.9078761,11.674839],[-13.9081971,11.67532],[-13.9085491,11.675606],[-13.9087631,11.675723],[-13.9092881,11.675911],[-13.9097041,11.675865],[-13.9099541,11.675793],[-13.9102041,11.675793],[-13.9103061,11.675929],[-13.9103741,11.676143],[-13.9102141,11.676322],[-13.9101801,11.676431],[-13.9101941,11.676676],[-13.9103241,11.67695],[-13.9103851,11.677017],[-13.9107791,11.677191],[-13.9109551,11.677396],[-13.9109491,11.677505],[-13.9111211,11.677641],[-13.9114991,11.677496],[-13.9116531,11.677571],[-13.9122331,11.678199],[-13.9127351,11.678846],[-13.9129771,11.678951],[-13.9132721,11.678826],[-13.9134421,11.678817],[-13.9143451,11.679143],[-13.9145871,11.679318],[-13.9148671,11.6794],[-13.9153551,11.679372],[-13.9157531,11.679505],[-13.9165981,11.680418],[-13.9169671,11.680551],[-13.9172571,11.680544],[-13.9173751,11.680413],[-13.9176691,11.680226],[-13.9177911,11.680196],[-13.9179571,11.680226],[-13.9183781,11.680678],[-13.9186851,11.681183],[-13.9198751,11.681985],[-13.9221191,11.685015],[-13.9225261,11.684668],[-13.9230781,11.683442],[-13.9237591,11.682783],[-13.9249601,11.682338],[-13.9251071,11.681618],[-13.9253261,11.680946],[-13.9260851,11.68074],[-13.9266881,11.679964],[-13.9266901,11.679387],[-13.9266041,11.678991],[-13.9269551,11.678684],[-13.9279301,11.678582],[-13.9280476,11.6784204],[-13.9281601,11.678266],[-13.9281031,11.677933],[-13.9286141,11.677688],[-13.9289331,11.676914],[-13.9291511,11.676628],[-13.9297961,11.676424],[-13.9301231,11.676159],[-13.9302381,11.675962],[-13.9303531,11.675697],[-13.9303601,11.674997],[-13.9304691,11.674514],[-13.9304211,11.674256],[-13.9304386,11.6742403],[-13.9306801,11.674025],[-13.9307951,11.673685],[-13.9309651,11.673481],[-13.9309591,11.673352],[-13.9310741,11.673264],[-13.9310811,11.673073],[-13.9309991,11.672625],[-13.9310471,11.67238],[-13.9309991,11.672101],[-13.9310401,11.671306],[-13.9311081,11.670926],[-13.9315021,11.670253],[-13.9316591,11.669682],[-13.9316861,11.669158],[-13.9316181,11.668125],[-13.9312851,11.667615],[-13.9312441,11.667452],[-13.9312711,11.667276],[-13.9313121,11.667119],[-13.9315431,11.666732],[-13.9316041,11.666412],[-13.9319371,11.665943],[-13.9323541,11.664516],[-13.9325321,11.664324],[-13.9329841,11.663968],[-13.9331211,11.663763],[-13.9331761,11.66353],[-13.9331071,11.663064],[-13.9329501,11.662742],[-13.9330251,11.662395],[-13.9331611,11.662069],[-13.9331671,11.661926],[-13.9330861,11.661777],[-13.9329641,11.661763],[-13.9329021,11.661708],[-13.9327921,11.661434],[-13.9327651,11.660941],[-13.9328061,11.660667],[-13.9332301,11.659955],[-13.9335041,11.659024],[-13.9338611,11.658147],[-13.9340521,11.657873],[-13.9342401,11.657018],[-13.9345761,11.65659],[-13.9347491,11.656462],[-13.9349931,11.656404],[-13.9354441,11.656103],[-13.9356651,11.655512],[-13.9357461,11.655408],[-13.9362441,11.655061],[-13.9363021,11.654852],[-13.9393371,11.654562],[-13.9883921,11.641663],[-14.0080561,11.647633],[-14.0082711,11.64799],[-14.0095121,11.649074],[-14.0106751,11.649812],[-14.0116021,11.650319],[-14.0125254,11.6505738],[-14.012674,11.6505394],[-14.0129841,11.650637],[-14.0142688,11.6511151],[-14.0146575,11.6510832],[-14.0151953,11.651067],[-14.0155401,11.6509626],[-14.0160576,11.6509126],[-14.0163621,11.6509216],[-14.0165986,11.6510342],[-14.0174371,11.651837],[-14.0179281,11.651882],[-14.0186371,11.651264],[-14.0195641,11.651718],[-14.0199181,11.651737],[-14.0208025,11.6523783],[-14.0211646,11.6525516],[-14.0213872,11.6526987],[-14.0216622,11.6528147],[-14.0224033,11.6531099],[-14.0227367,11.6531897],[-14.0232928,11.6533227],[-14.0236349,11.653232],[-14.0238012,11.6531191],[-14.0239782,11.6531874],[-14.0242876,11.6532268],[-14.0248452,11.6530458],[-14.0251369,11.653169],[-14.0252945,11.6532458],[-14.0255232,11.6531768],[-14.0255711,11.653037],[-14.0257351,11.6529372],[-14.0261891,11.652927],[-14.0264161,11.652691],[-14.0267251,11.6525],[-14.0274071,11.652509],[-14.0280801,11.652682],[-14.0281981,11.652619],[-14.0284102,11.652741],[-14.0287709,11.6529486],[-14.028943,11.6529115],[-14.0289687,11.6528503],[-14.0291066,11.6526562],[-14.029348,11.6528301],[-14.0295009,11.6528616],[-14.029635,11.6525753],[-14.0296846,11.6525623],[-14.0298818,11.6527697],[-14.0299494,11.6527692],[-14.0300132,11.65273],[-14.030373,11.6525091],[-14.0305622,11.6525441],[-14.0307374,11.652662],[-14.0310163,11.6526882],[-14.0311102,11.6528721],[-14.0312685,11.6529588],[-14.0313623,11.6529194],[-14.0315299,11.6528393],[-14.0317352,11.6528327],[-14.0318371,11.653028],[-14.0319321,11.653131],[-14.0321431,11.653206],[-14.0324785,11.6531614],[-14.0327303,11.6532635],[-14.0327901,11.653378],[-14.0328483,11.6534343],[-14.0329556,11.6534527],[-14.0331125,11.6533386],[-14.0332205,11.6532168],[-14.0335886,11.6532583],[-14.0336953,11.6532792],[-14.0339045,11.6533202],[-14.0340202,11.653464],[-14.0340181,11.653628],[-14.0340972,11.6536791],[-14.0344281,11.653605],[-14.0347741,11.6535875],[-14.0349401,11.653628],[-14.0351521,11.653711],[-14.0354176,11.6538483],[-14.035737,11.6539387],[-14.0359037,11.6539893],[-14.0363372,11.6542151],[-14.0367858,11.6542723],[-14.0372761,11.65445],[-14.0374672,11.6543202],[-14.0377755,11.6542802],[-14.0381061,11.6543169],[-14.0382154,11.6544614],[-14.0384211,11.654607],[-14.0386801,11.654635],[-14.0391051,11.654801],[-14.0392102,11.6546712],[-14.0393171,11.654579],[-14.0394371,11.654561],[-14.0402581,11.6544741],[-14.0404838,11.6545304],[-14.0406201,11.654431],[-14.0408141,11.654265],[-14.0409891,11.65396],[-14.0414791,11.653517],[-14.0420791,11.653212],[-14.0421901,11.653203],[-14.0423001,11.653092],[-14.0423841,11.65276],[-14.0425871,11.652464],[-14.0425961,11.65167],[-14.0424851,11.651495],[-14.0424481,11.651328],[-14.0424941,11.65119],[-14.0429281,11.650645],[-14.0430513,11.6502572],[-14.0430571,11.650239],[-14.0432251,11.650032],[-14.0434971,11.649806],[-14.0433731,11.649529],[-14.0436211,11.648971],[-14.0436491,11.648699],[-14.0436161,11.648485],[-14.0437351,11.648351],[-14.0437401,11.648275],[-14.0436541,11.648017],[-14.0436921,11.647821],[-14.0438111,11.647619],[-14.0438531,11.647356],[-14.0438461,11.647217],[-14.0437901,11.6471204],[-14.0437701,11.647086],[-14.0437351,11.64676],[-14.0436311,11.646546],[-14.0436591,11.646359],[-14.0440951,11.645998],[-14.0444001,11.64541],[-14.0444423,11.6453963],[-14.0446751,11.645321],[-14.0447851,11.645226],[-14.0449001,11.645235],[-14.0453151,11.645383],[-14.0458201,11.645493],[-14.0461111,11.645493],[-14.0462931,11.645579],[-14.0466551,11.645588],[-14.0469911,11.645707],[-14.0470951,11.645832],[-14.0471991,11.646206],[-14.0474851,11.6464492],[-14.0475661,11.646518],[-14.0478011,11.64649],[-14.0481961,11.646081],[-14.0484041,11.645998],[-14.0485911,11.645985],[-14.0495611,11.646338],[-14.0503501,11.646393],[-14.0507351,11.646581],[-14.0510111,11.646614],[-14.0512261,11.646724],[-14.0517461,11.646671],[-14.0519891,11.646748],[-14.0521951,11.646695],[-14.0523711,11.646719],[-14.0527711,11.646888],[-14.0541991,11.646891],[-14.0544551,11.647002],[-14.0548051,11.647362],[-14.0552051,11.647688],[-14.0553941,11.648063],[-14.0557401,11.648286],[-14.0560501,11.648323],[-14.0562601,11.648274],[-14.0565211,11.648088],[-14.0569301,11.647976],[-14.0569921,11.647531],[-14.0568301,11.647109],[-14.0569141,11.646829],[-14.0572331,11.646662],[-14.0573671,11.646648],[-14.0581301,11.64692],[-14.0584311,11.64692],[-14.0590271,11.646824],[-14.0593511,11.646719],[-14.0599843,11.646248],[-14.0601751,11.646106],[-14.0603135,11.6459068],[-14.0611051,11.644768],[-14.0611541,11.64457],[-14.0613971,11.644375],[-14.0616681,11.643901],[-14.0618681,11.643657],[-14.0621011,11.643468],[-14.0621011,11.643159],[-14.0623931,11.642872],[-14.0624431,11.642674],[-14.0626901,11.642488],[-14.0629881,11.642352],[-14.0630931,11.642183],[-14.0630591,11.641943],[-14.0632161,11.641838],[-14.0635501,11.641814],[-14.0638941,11.641862],[-14.0640271,11.641824],[-14.0643091,11.641514],[-14.0645331,11.641416],[-14.0649691,11.640989],[-14.0651021,11.640767],[-14.0657311,11.640234],[-14.0659921,11.640144],[-14.0661811,11.640144],[-14.0669701,11.639611],[-14.0672031,11.639133],[-14.0673031,11.638677],[-14.0674701,11.638455],[-14.0679691,11.638018],[-14.0681311,11.638023],[-14.0683231,11.63787],[-14.0684371,11.637665],[-14.0685631,11.637112],[-14.0687241,11.636926],[-14.0690331,11.636715],[-14.0692441,11.63669],[-14.0693931,11.63643],[-14.0695911,11.636306],[-14.0697771,11.636257],[-14.0702951,11.635876],[-14.0707061,11.635717],[-14.0714611,11.63591],[-14.0717471,11.63591],[-14.0722301,11.635637],[-14.0726511,11.635291],[-14.0728371,11.635229],[-14.0730971,11.635241],[-14.0739641,11.635006],[-14.0748631,11.634409],[-14.0761111,11.633917],[-14.0775441,11.634126],[-14.0779901,11.634089],[-14.0784241,11.633829],[-14.0786661,11.633376],[-14.0787731,11.633272],[-14.0791241,11.633133],[-14.0793421,11.632914],[-14.0793811,11.632621],[-14.0794461,11.632478],[-14.0796211,11.63232],[-14.0797431,11.632081],[-14.0798791,11.631633],[-14.0800941,11.631433],[-14.0801521,11.631297],[-14.0800851,11.630841],[-14.0803851,11.629608],[-14.0805401,11.62926],[-14.0810381,11.628848],[-14.0811551,11.628449],[-14.0811261,11.627924],[-14.0812111,11.627542],[-14.0815761,11.627253],[-14.0817241,11.62703],[-14.0822161,11.626499],[-14.0822401,11.626247],[-14.0823891,11.626123],[-14.0825621,11.62611],[-14.0831071,11.626185],[-14.0837391,11.626123],[-14.0839991,11.626234],[-14.0840981,11.626383],[-14.0841481,11.626569],[-14.0841231,11.627052],[-14.0841851,11.62756],[-14.0843571,11.627862],[-14.0846771,11.627951],[-14.0850771,11.628266],[-14.0857531,11.628293],[-14.0864451,11.628143],[-14.0867271,11.628286],[-14.0869101,11.628526],[-14.0871461,11.629009],[-14.0873311,11.629133],[-14.0875791,11.629133],[-14.0878521,11.629059],[-14.0884091,11.629009],[-14.0886941,11.629109],[-14.0889921,11.629592],[-14.0892641,11.629827],[-14.0896111,11.629864],[-14.0897971,11.629815],[-14.0906021,11.629208],[-14.0908001,11.629121],[-14.0912791,11.629162],[-14.0913901,11.629196],[-14.0916781,11.629459],[-14.0919581,11.629569],[-14.0923781,11.629612],[-14.0927381,11.629705],[-14.0934591,11.629756],[-14.0936881,11.629824],[-14.0939091,11.63007],[-14.0941381,11.630171],[-14.0946291,11.630162],[-14.0950001,11.630236],[-14.0950991,11.630174],[-14.0955701,11.630112],[-14.0958181,11.630149],[-14.0960161,11.630298],[-14.0962891,11.630806],[-14.0965361,11.631041],[-14.0968711,11.63119],[-14.0970571,11.63119],[-14.0973701,11.631088],[-14.0976801,11.631113],[-14.0983861,11.631348],[-14.0987081,11.631348],[-14.0989561,11.631249],[-14.0991051,11.631138],[-14.0993901,11.631051],[-14.0997001,11.631138],[-14.0999971,11.631286],[-14.1002571,11.631559],[-14.1004801,11.631943],[-14.1005791,11.63229],[-14.1008641,11.632575],[-14.1012111,11.632736],[-14.1014961,11.632748],[-14.1023381,11.63224],[-14.1028211,11.632153],[-14.1032301,11.632166],[-14.1037881,11.632401],[-14.1040111,11.632686],[-14.1042461,11.633368],[-14.1043331,11.633764],[-14.1044941,11.633962],[-14.1046421,11.634033],[-14.1049781,11.633988],[-14.1053261,11.634005],[-14.1054621,11.634082],[-14.1056311,11.63437],[-14.1056651,11.634582],[-14.1059821,11.635321],[-14.1061941,11.635454],[-14.1070711,11.635721],[-14.1076841,11.635999],[-14.1077691,11.636075],[-14.1078371,11.636448],[-14.1077731,11.636663],[-14.1074941,11.637232],[-14.1074381,11.637555],[-14.1074491,11.638088],[-14.1079611,11.639033],[-14.1082391,11.639733],[-14.1086941,11.640189],[-14.1089721,11.640389],[-14.1093391,11.640522],[-14.1096001,11.640559],[-14.1104581,11.640384],[-14.1108481,11.640384],[-14.1110431,11.640537],[-14.1111172,11.6407128],[-14.1110771,11.640867],[-14.1109501,11.64102],[-14.1107881,11.641122],[-14.1102881,11.641283],[-14.1099051,11.641533],[-14.1097201,11.641775],[-14.1097292,11.6418792],[-14.1097381,11.641979],[-14.1098661,11.642072],[-14.1100531,11.642309],[-14.1103051,11.642703],[-14.1107271,11.642959],[-14.1111941,11.643124],[-14.1116511,11.643457],[-14.1120401,11.64359],[-14.1122961,11.64359],[-14.1125071,11.643646],[-14.1127731,11.643801],[-14.1130911,11.643842],[-14.1132481,11.643777],[-14.1136171,11.643798],[-14.1141391,11.643738],[-14.1149278,11.6432689],[-14.1154364,11.6428512],[-14.1156912,11.6426237],[-14.1159331,11.6423988],[-14.1162521,11.64227],[-14.1163864,11.6421907],[-14.1166638,11.642031],[-14.1171081,11.641996],[-14.1176171,11.64208],[-14.1182191,11.642538],[-14.1185841,11.642717],[-14.1189651,11.642784],[-14.1189552,11.6430001],[-14.1188962,11.6431052],[-14.1188315,11.6431591],[-14.1187674,11.6431998],[-14.1186816,11.6432996],[-14.118628,11.643431],[-14.1186062,11.6435321],[-14.1186062,11.6435952],[-14.118617,11.6437055],[-14.1186599,11.6438316],[-14.1186816,11.6439406],[-14.1186762,11.6440404],[-14.1186652,11.6441784],[-14.1186065,11.6443031],[-14.1185258,11.6444148],[-14.1184992,11.6445185],[-14.1184992,11.6446394],[-14.1185365,11.6447353],[-14.1185529,11.6448443],[-14.1185419,11.6449244],[-14.1185046,11.6450334],[-14.118467,11.6451123],[-14.1184241,11.6451806],[-14.1183436,11.6452699],[-14.1179786,11.6455339],[-14.1178823,11.6456009],[-14.1178394,11.6456429],[-14.1178018,11.6457112],[-14.1178018,11.6457743],[-14.1178445,11.6458701],[-14.1178877,11.6459687],[-14.1179091,11.6460685],[-14.1179089,11.6461696],[-14.1178984,11.6462576],[-14.1178608,11.6463732],[-14.1178177,11.6464743],[-14.1177587,11.6466215],[-14.1176838,11.6468303],[-14.117657,11.6469722],[-14.117657,11.647051],[-14.1176785,11.6471455],[-14.1177265,11.6472152],[-14.1177855,11.6472572],[-14.1178552,11.6472835],[-14.1179679,11.647315],[-14.1181237,11.6474135],[-14.1182954,11.6475343],[-14.1183758,11.6476026],[-14.1184614,11.6477248],[-14.118515,11.6478456],[-14.1185526,11.6479717],[-14.1185743,11.6480807],[-14.1186223,11.6482134],[-14.1186652,11.6482922],[-14.1187352,11.6483224],[-14.1188533,11.6483382],[-14.1189549,11.64835],[-14.1191054,11.6483802],[-14.1191966,11.648438],[-14.1192392,11.6485076],[-14.119261,11.6485956],[-14.1192931,11.6486692],[-14.1193626,11.6487125],[-14.1194324,11.648723],[-14.1195185,11.648706],[-14.119604,11.6486968],[-14.1196523,11.6486968],[-14.119722,11.6487178],[-14.1198079,11.6487598],[-14.1199208,11.6488216],[-14.1201085,11.6489582],[-14.1202317,11.649033],[-14.120355,11.6490803],[-14.1204626,11.6491053],[-14.1206289,11.6491473],[-14.1207681,11.6492011],[-14.1209183,11.6492589],[-14.1210634,11.6493312],[-14.1212243,11.6494258],[-14.1213584,11.6495308],[-14.1214121,11.6496201],[-14.1214708,11.6496635],[-14.121562,11.649695],[-14.1216642,11.649699],[-14.1218091,11.6496937],[-14.1219539,11.6496674],[-14.1220934,11.6496569],[-14.122206,11.6496517],[-14.1223294,11.6496727],[-14.1225064,11.6497515],[-14.1226727,11.6498303],[-14.1227907,11.6498566],[-14.1231823,11.6499459],[-14.1232947,11.6499682],[-14.1234771,11.6500418],[-14.1235793,11.6501035],[-14.1236598,11.6501928],[-14.1237027,11.6502926],[-14.1237456,11.6504555],[-14.123799,11.6505987],[-14.1238744,11.6506919],[-14.1239701,11.6507923],[-14.1240825,11.6508984],[-14.1242177,11.6509809],[-14.1243303,11.6510282],[-14.1244642,11.6510715],[-14.1246788,11.6511346],[-14.1248453,11.6511806],[-14.1250113,11.6512502],[-14.1255373,11.6515378],[-14.1256229,11.6516442],[-14.1257144,11.651748],[-14.1258163,11.6518268],[-14.1259289,11.6518741],[-14.1260091,11.6519174],[-14.1261111,11.6519647],[-14.1262079,11.6520422],[-14.1262615,11.652079],[-14.1263152,11.6521105],[-14.126401,11.6521263],[-14.1264919,11.6521591],[-14.1265617,11.6521854],[-14.126626,11.6522169],[-14.1266907,11.6522786],[-14.1267282,11.6523469],[-14.1267226,11.652427],[-14.1266746,11.6525255],[-14.1266368,11.6525689],[-14.1266317,11.6526149],[-14.1265992,11.652674],[-14.1265566,11.6527042],[-14.1265029,11.6527725],[-14.1264866,11.6528684],[-14.1264868,11.6529143],[-14.1265566,11.6529459],[-14.1266582,11.6529682],[-14.1267548,11.6529472],[-14.1268621,11.6529104],[-14.126975,11.6529038],[-14.1270391,11.6529051],[-14.1270926,11.6529262],[-14.1271464,11.6529472],[-14.1272861,11.6530089],[-14.1273288,11.6530575],[-14.1273717,11.6531153],[-14.1274039,11.6531836],[-14.1274522,11.6532309],[-14.1275061,11.6532296],[-14.1275594,11.6532151],[-14.1276238,11.6531783],[-14.1276938,11.653177],[-14.1278333,11.6532085],[-14.1279352,11.6532191],[-14.1280532,11.6532296],[-14.1281924,11.6532466],[-14.1282461,11.6532887],[-14.1283319,11.6533307],[-14.1284287,11.6533924],[-14.1286913,11.6536407],[-14.1287825,11.6537352],[-14.1288362,11.6537825],[-14.1288952,11.6538141],[-14.1289866,11.6538495],[-14.1290347,11.6538824],[-14.1290561,11.6539507],[-14.1290349,11.6540176],[-14.1289864,11.6540767],[-14.1289649,11.654145],[-14.1289757,11.6542291],[-14.1290081,11.6543066],[-14.12904,11.6543552],[-14.1290508,11.6544182],[-14.1290403,11.6544905],[-14.1290349,11.6545483],[-14.1290454,11.6546074],[-14.1290937,11.6546652],[-14.1291366,11.654744],[-14.1291473,11.654828],[-14.1291634,11.6549384],[-14.1291959,11.6550211],[-14.1292546,11.655075],[-14.1293139,11.6550999],[-14.1293729,11.6551052],[-14.1294209,11.6551433],[-14.1294855,11.655205],[-14.129555,11.6552483],[-14.1296838,11.6553061],[-14.1297699,11.6553363],[-14.129802,11.6553836],[-14.1297913,11.6554414],[-14.1297591,11.6554835],[-14.1297269,11.6555202],[-14.1296891,11.6555636],[-14.1296894,11.6556148],[-14.1297159,11.6556739],[-14.1297964,11.655758],[-14.1298664,11.655846],[-14.1299252,11.6559524],[-14.1299573,11.6560417],[-14.1299788,11.656152],[-14.1300113,11.6562347],[-14.1300434,11.6563346],[-14.1301454,11.6564607],[-14.1302148,11.6565618],[-14.1303489,11.6566774],[-14.1304994,11.6568022],[-14.1306121,11.6568967],[-14.1309117,11.6572416],[-14.1312856,11.6576141],[-14.131616,11.6578742],[-14.1319073,11.6580507],[-14.1321959,11.6581999],[-14.1323783,11.6583533],[-14.1326245,11.6585603],[-14.1350621,11.664702],[-14.1788622,11.6565602],[-14.1791873,11.6565244],[-14.1795261,11.656559],[-14.1798221,11.656702],[-14.1799661,11.656957],[-14.1802391,11.657173],[-14.1808281,11.657429],[-14.1810841,11.65747],[-14.1815221,11.657767],[-14.1818191,11.657814],[-14.1821871,11.657773],[-14.1828871,11.65761],[-14.1832251,11.657639],[-14.1837441,11.657756],[-14.1839311,11.657902],[-14.1840421,11.658129],[-14.1840651,11.65852],[-14.1843901,11.659114],[-14.1845501,11.659314],[-14.1851971,11.659537],[-14.1857121,11.6596],[-14.1861181,11.659818],[-14.1863071,11.660173],[-14.1863471,11.660579],[-14.1865301,11.661363],[-14.1868221,11.66201],[-14.1874171,11.662617],[-14.1879271,11.662868],[-14.1880821,11.66308],[-14.1881921,11.663336],[-14.1884501,11.663643],[-14.1889611,11.664164],[-14.1892131,11.664329],[-14.1895421,11.664493],[-14.1906371,11.664754],[-14.1910881,11.664965],[-14.1915661,11.665094],[-14.1920681,11.665397],[-14.1925401,11.665525],[-14.1926281,11.665589],[-14.1926741,11.665788],[-14.1927851,11.66584],[-14.1929781,11.666079],[-14.1930891,11.666108],[-14.1932171,11.666307],[-14.1934851,11.666441],[-14.1937941,11.666505],[-14.1940391,11.666692],[-14.1944071,11.666727],[-14.1951471,11.666587],[-14.1952701,11.666587],[-14.1954161,11.666674],[-14.1955961,11.66659],[-14.1961621,11.666628],[-14.1963021,11.666715],[-14.1965821,11.666773],[-14.1969211,11.666978],[-14.1971661,11.666995],[-14.1972591,11.667059],[-14.1972821,11.667339],[-14.1975211,11.667444],[-14.1976341,11.667665],[-14.1977021,11.667716],[-14.1981871,11.667712],[-14.1984901,11.667765],[-14.1989101,11.668057],[-14.1991431,11.668331],[-14.1993711,11.66836],[-14.1998431,11.668237],[-14.2005011,11.668277],[-14.2006151,11.668409],[-14.2006041,11.668557],[-14.2003911,11.668792],[-14.2003911,11.668879],[-14.2006071,11.668978],[-14.2010621,11.669013],[-14.2015281,11.66934],[-14.2016571,11.66969],[-14.2018261,11.669701],[-14.2020421,11.669567],[-14.2022691,11.670005],[-14.2024621,11.670075],[-14.2026781,11.670046],[-14.2027361,11.670075],[-14.2027881,11.670483],[-14.2028821,11.670646],[-14.2029811,11.670716],[-14.2034651,11.670845],[-14.2035241,11.670915],[-14.2035291,11.67109],[-14.2034711,11.671276],[-14.2035931,11.671463],[-14.2037101,11.671556],[-14.2038441,11.671533],[-14.2042761,11.671282],[-14.2043751,11.671271],[-14.2044101,11.671329],[-14.2043691,11.671597],[-14.2044171,11.67184],[-14.2047761,11.672461],[-14.2048741,11.672541],[-14.2051261,11.672564],[-14.2054401,11.672392],[-14.2055781,11.672197],[-14.2056691,11.67214],[-14.2061781,11.672059],[-14.2063761,11.671941],[-14.2066321,11.67193],[-14.2067431,11.671825],[-14.2068771,11.671784],[-14.2071521,11.671796],[-14.2073791,11.671959],[-14.2075311,11.671959],[-14.2076011,11.67193],[-14.2077291,11.671632],[-14.2077991,11.671591],[-14.2082251,11.671644],[-14.2083651,11.671586],[-14.2084181,11.671376],[-14.2085031,11.67132],[-14.2087501,11.671271],[-14.2090011,11.671043],[-14.2092861,11.671055],[-14.2095601,11.671148],[-14.2097701,11.671125],[-14.2098801,11.671156],[-14.2102081,11.671081],[-14.2103511,11.67099],[-14.2104481,11.670858],[-14.2106031,11.670789],[-14.2105911,11.670452],[-14.2106711,11.670389],[-14.2108661,11.670452],[-14.2111521,11.670452],[-14.2113821,11.670652],[-14.2115471,11.670608],[-14.2118091,11.670288],[-14.2118961,11.670246],[-14.2120511,11.67024],[-14.2121821,11.670286],[-14.2125141,11.670269],[-14.2126121,11.670211],[-14.2126921,11.670045],[-14.2125831,11.669628],[-14.2126861,11.669462],[-14.2128181,11.669444],[-14.2130411,11.669513],[-14.2132131,11.669639],[-14.2132871,11.669788],[-14.2134361,11.669874],[-14.2135441,11.669868],[-14.2138131,11.669696],[-14.2143291,11.669525],[-14.2147041,11.669186],[-14.2148341,11.669195],[-14.2150341,11.669307],[-14.2151811,11.669307],[-14.2154411,11.669207],[-14.2157371,11.669299],[-14.2160401,11.669567],[-14.2165431,11.669845],[-14.2168041,11.669836],[-14.2173321,11.66962],[-14.2175151,11.669637],[-14.2176791,11.66955],[-14.2177751,11.669437],[-14.2181221,11.669403],[-14.2182521,11.669342],[-14.2184278,11.6692135],[-14.2186511,11.669177],[-14.2191531,11.669565],[-14.2193821,11.669559],[-14.2195831,11.669341],[-14.2195891,11.669118],[-14.2195261,11.668918],[-14.2195891,11.668763],[-14.2198571,11.668758],[-14.2201031,11.668935],[-14.2201951,11.668884],[-14.2203211,11.668672],[-14.2204871,11.668689],[-14.2207671,11.668796],[-14.2209841,11.668778],[-14.2212271,11.668735],[-14.2216041,11.668563],[-14.2217341,11.668617],[-14.2217981,11.668716],[-14.2218091,11.66906],[-14.2219261,11.669124],[-14.2222991,11.668926],[-14.2224861,11.668902],[-14.2225331,11.668984],[-14.2225391,11.669252],[-14.2226611,11.669282],[-14.2229121,11.669089],[-14.2231161,11.669025],[-14.2232971,11.669112],[-14.2233901,11.669631],[-14.2236941,11.669742],[-14.2238331,11.669941],[-14.2239501,11.669952],[-14.2241661,11.669871],[-14.2246621,11.670017],[-14.2252431,11.670392],[-14.2255351,11.670669],[-14.2259181,11.670847],[-14.2262101,11.670858],[-14.2264851,11.670755],[-14.2267421,11.670789],[-14.2271151,11.671224],[-14.2273841,11.671242],[-14.2274811,11.671213],[-14.2275901,11.67111],[-14.2277041,11.670852],[-14.2277041,11.670749],[-14.2276411,11.670635],[-14.2276581,11.670543],[-14.2277101,11.670475],[-14.2278641,11.670452],[-14.2280441,11.670895],[-14.2282341,11.671059],[-14.2284431,11.671075],[-14.2287591,11.670782],[-14.2289421,11.670718],[-14.2291431,11.670762],[-14.2295491,11.671042],[-14.2297371,11.671042],[-14.2304551,11.670881],[-14.2307831,11.670976],[-14.2314791,11.671055],[-14.2318541,11.671159],[-14.2321901,11.671297],[-14.2323871,11.671297],[-14.2333071,11.671251],[-14.2337421,11.671326],[-14.2338961,11.671406],[-14.2339871,11.671612],[-14.2343651,11.671812],[-14.2346606,11.6718835],[-14.2351404,11.6718036],[-14.2355431,11.671401],[-14.2359101,11.670985],[-14.2361811,11.670652],[-14.2362511,11.6706],[-14.2366691,11.670397],[-14.2368291,11.670246],[-14.2370301,11.670176],[-14.2371169,11.670098],[-14.2373231,11.669913],[-14.2381721,11.669384],[-14.2385481,11.669187],[-14.2387581,11.6692],[-14.2390255,11.669055],[-14.2393185,11.668793],[-14.2396528,11.6686425],[-14.2398942,11.6684197],[-14.2400918,11.6680483],[-14.240219,11.6678918],[-14.2404232,11.6677519],[-14.2406171,11.66775],[-14.2408891,11.667547],[-14.2410061,11.667274],[-14.2412041,11.667218],[-14.2414831,11.666993],[-14.2416771,11.666772],[-14.2423081,11.666223],[-14.2427231,11.665711],[-14.2429861,11.66558],[-14.2431211,11.665424],[-14.2439841,11.664805],[-14.2442141,11.664737],[-14.2447022,11.6645008],[-14.2452621,11.664426],[-14.2455741,11.664415],[-14.2461261,11.664516],[-14.2468871,11.664357],[-14.2475901,11.664345],[-14.2484751,11.664301],[-14.2486211,11.664273],[-14.2490821,11.664147],[-14.2497521,11.664119],[-14.2500451,11.664119],[-14.2504579,11.6641373],[-14.2508661,11.664194],[-14.2511051,11.664194],[-14.2513641,11.664322],[-14.2515711,11.664338],[-14.2517971,11.664447],[-14.252683,11.6645465],[-14.2534821,11.664778],[-14.2546121,11.665402],[-14.2554301,11.665675],[-14.2558331,11.665856],[-14.2671451,11.677024],[-14.2893911,11.644302],[-14.3195211,11.602356],[-14.3664023,11.5800646],[-14.4112975,11.5567466],[-14.4503401,11.536803],[-14.5115521,11.49649],[-14.5858241,11.505541],[-14.6194001,11.507817],[-14.6636041,11.504958],[-14.6714501,11.497333],[-14.6767211,11.49292],[-14.6901811,11.482991],[-14.7016301,11.47186],[-14.7034111,11.467812],[-14.7266621,11.432953],[-14.7438501,11.409878],[-14.7525551,11.398932],[-14.772313,11.364614],[-14.7769241,11.354573],[-14.7795062,11.3480093],[-14.7877956,11.3284035],[-14.7967442,11.3064201],[-14.8154855,11.2593911],[-14.8323381,11.2228216],[-14.8374531,11.2025197],[-14.8645114,11.1538165],[-14.8826494,11.1216602],[-14.8933632,11.103811],[-14.9070675,11.078764],[-14.9118618,11.0700004],[-14.9318248,11.0435241],[-14.9362953,11.0331599],[-14.9359099,11.026351],[-14.9413824,11.0204498],[-14.9495526,11.01644],[-14.9541002,11.0117493],[-14.9550251,10.9949527],[-14.9576728,10.9770435],[-14.9761436,10.9667467],[-14.984349,10.963629],[-14.9903314,10.9603342],[-15.0022361,10.955649],[-15.0051543,10.9527586],[-15.0072975,10.9497608],[-15.0097966,10.9441522],[-15.0214779,10.9315207],[-15.0311055,10.925932],[-15.0342376,10.9257242],[-15.0360999,10.925267],[-15.0382797,10.9246437],[-15.0397399,10.9237501],[-15.0411578,10.9214229],[-15.0436339,10.9161864],[-15.0456443,10.9140461],[-15.0504334,10.910477],[-15.0620173,10.9013622],[-15.0685104,10.8962529],[-15.0740265,10.8917638]]],[[[-14.6354078,10.5623213],[-14.6354172,10.5623147],[-14.63544,10.5622923],[-14.6354467,10.5622606],[-14.6354628,10.5622145],[-14.6354856,10.5621934],[-14.6355057,10.5621697],[-14.6354976,10.5621341],[-14.635504,10.5620308],[-14.6354882,10.5619996],[-14.6354239,10.5619521],[-14.6353555,10.5619535],[-14.6353287,10.5619324],[-14.6352951,10.561906],[-14.6352817,10.5619205],[-14.635271,10.5619811],[-14.6352187,10.5620497],[-14.6352093,10.5620893],[-14.635208,10.5621262],[-14.6352656,10.5621921],[-14.6353568,10.5622751],[-14.635385,10.5623134],[-14.6354078,10.5623213]]]]}]}
