# Supplementary material
Source: ML conference proceedings conference paper supplement (https://proceedings.neurips.cc/paper_files/paper/2022/hash/9d3faa41886997cfc2128b930077fa49-Abstract.html)
Supplement: Supplementary file 1 [file 9d3faa41886997cfc2128b930077fa49-Supplemental-Conference.zip › code/ebola/map/geojson/bombali.geojson]

{"type":"GeometryCollection","geometries":[{"type":"MultiPolygon","coordinates":[[[[-12.3837187,9.0721276],[-12.3829829,9.0712587],[-12.3809082,9.0681041],[-12.380359,9.067382],[-12.3797117,9.0668889],[-12.3789534,9.0665236],[-12.3781616,9.066409],[-12.3766463,9.0666684],[-12.3751694,9.0670676],[-12.3725523,9.0680847],[-12.3713381,9.0685679],[-12.3707687,9.0691698],[-12.3700897,9.0699377],[-12.3694978,9.0704673],[-12.3682053,9.0718335],[-12.3659222,9.0732393],[-12.3631169,9.0750242],[-12.3602141,9.0767796],[-12.3591127,9.0780103],[-12.3586795,9.0787875],[-12.3576688,9.0818701],[-12.3569117,9.0838638],[-12.3559904,9.08585],[-12.3551015,9.0875439],[-12.3549321,9.0883838],[-12.3547951,9.0887155],[-12.3544216,9.0889049],[-12.3541961,9.0892047],[-12.3537305,9.0895734],[-12.3534835,9.0898024],[-12.3529606,9.0900299],[-12.3527479,9.0901418],[-12.3526046,9.0901669],[-12.3524523,9.0901382],[-12.3519226,9.0899888],[-12.3514082,9.0896962],[-12.3511193,9.0899844],[-12.3510083,9.0902035],[-12.3510823,9.0907058],[-12.3514152,9.0910436],[-12.3517111,9.0913815],[-12.3522197,9.0918837],[-12.3527119,9.0922461],[-12.3527654,9.0922855],[-12.3532277,9.0927512],[-12.3533665,9.0931804],[-12.3534127,9.0935731],[-12.3532185,9.0939201],[-12.3528393,9.094194],[-12.3526174,9.0944497],[-12.35234,9.0948241],[-12.3521827,9.0950615],[-12.3516279,9.0953354],[-12.3510915,9.0956824],[-12.3507771,9.0958559],[-12.350287,9.0961116],[-12.3497599,9.0961116],[-12.349353,9.0960294],[-12.3490755,9.0957464],[-12.3489091,9.0954176],[-12.3488906,9.0951345],[-12.3488258,9.0947328],[-12.3487241,9.0944588],[-12.3485022,9.0942671],[-12.3482525,9.0943036],[-12.3480953,9.094404],[-12.3479751,9.0945501],[-12.3478918,9.0947419],[-12.3476421,9.0948515],[-12.3471798,9.0949154],[-12.3468931,9.095025],[-12.3464307,9.0952898],[-12.3460885,9.0955455],[-12.3458666,9.0956642],[-12.3454412,9.095792],[-12.3449603,9.0960294],[-12.3444887,9.096276],[-12.3441095,9.0966321],[-12.3438876,9.0967234],[-12.3436841,9.0966778],[-12.3434344,9.0965408],[-12.3431293,9.0964769],[-12.3428426,9.0966047],[-12.3425837,9.0968056],[-12.3422322,9.0970247],[-12.3417884,9.0972987],[-12.3410855,9.0977644],[-12.3408173,9.0978922],[-12.3405584,9.0978192],[-12.3402162,9.0976183],[-12.3400405,9.0974083],[-12.3397076,9.0973626],[-12.3389308,9.0973078],[-12.3383482,9.0971435],[-12.3379413,9.0971252],[-12.3375344,9.0973261],[-12.3371275,9.097874],[-12.3366374,9.0984766],[-12.3362952,9.0991706],[-12.336027,9.0996728],[-12.3360085,9.0999559],[-12.3363045,9.1003759],[-12.3365264,9.1007595],[-12.3367299,9.1012799],[-12.3367576,9.1018187],[-12.3347106,9.1027649],[-12.3313418,9.1017479],[-12.3278442,9.099947],[-12.3261919,9.0973197],[-12.3253122,9.0923405],[-12.3225441,9.0892895],[-12.3194541,9.0892047],[-12.3151841,9.0905819],[-12.308425,9.0939508],[-12.301022,9.0988876],[-12.2966661,9.0999894],[-12.2913446,9.1003919],[-12.2846927,9.1004131],[-12.2745647,9.1007521],[-12.2706809,9.1011335],[-12.2659816,9.1053286],[-12.2614862,9.109852],[-12.2566368,9.1139411],[-12.2518732,9.1168013],[-12.2446205,9.1212717],[-12.2399213,9.1251911],[-12.2358872,9.1304664],[-12.2350075,9.1325214],[-12.2351161,9.1347527],[-12.2358671,9.1391381],[-12.2353093,9.1414898],[-12.2329704,9.1437778],[-12.2258036,9.1468919],[-12.220525,9.1502603],[-12.2178428,9.153099],[-12.217069,9.1571423],[-12.2162536,9.1628196],[-12.2163824,9.1654676],[-12.2148803,9.1700009],[-12.2126702,9.1721616],[-12.2055248,9.1764618],[-12.1971992,9.1827107],[-12.1914915,9.1882817],[-12.1890668,9.1954201],[-12.1851185,9.2054178],[-12.1831444,9.2084255],[-12.179561,9.2167496],[-12.1766428,9.2232732],[-12.1749262,9.2257089],[-12.171214,9.231597],[-12.1632961,9.2384379],[-12.15982,9.2415937],[-12.1580175,9.2431397],[-12.1666006,9.2431186],[-12.181063,9.244707],[-12.1905044,9.2469096],[-12.1997312,9.2514206],[-12.2070697,9.2529031],[-12.2119836,9.2528396],[-12.219129,9.2513359],[-12.2297505,9.2510818],[-12.2388486,9.2569694],[-12.2439769,9.2636616],[-12.2508863,9.2703961],[-12.2562722,9.2762199],[-12.2578171,9.2792482],[-12.2587827,9.2860247],[-12.2585038,9.2937329],[-12.2587398,9.2969092],[-12.2588257,9.299768],[-12.2575167,9.300975],[-12.254856,9.3010597],[-12.2496418,9.3015044],[-12.2454575,9.3028384],[-12.2437409,9.3056971],[-12.2432045,9.3124308],[-12.2433332,9.3225734],[-12.2456077,9.3278246],[-12.2479895,9.3313182],[-12.2518519,9.3356165],[-12.254856,9.3383902],[-12.2551135,9.3402323],[-12.2546843,9.3442552],[-12.2519163,9.3474311],[-12.2476033,9.3483839],[-12.2430113,9.3494213],[-12.2400287,9.3504164],[-12.2342137,9.3537617],[-12.2314027,9.3567681],[-12.2282699,9.3628022],[-12.2264889,9.3651734],[-12.2221974,9.3697253],[-12.2188715,9.3727104],[-12.2171763,9.3728798],[-12.2150091,9.370932],[-12.2142581,9.3632256],[-12.2136573,9.3563659],[-12.2103099,9.3514751],[-12.2023061,9.3432177],[-12.1938304,9.3379667],[-12.1890668,9.3366116],[-12.1798614,9.3365693],[-12.1720294,9.3363364],[-12.1657852,9.3369504],[-12.1635536,9.3361882],[-12.1606568,9.3328639],[-12.1578244,9.3308948],[-12.1490697,9.3311277],[-12.1458361,9.3316422],[-12.1426967,9.3338803],[-12.1401004,9.335553],[-12.1371821,9.3374374],[-12.1347789,9.3383267],[-12.1311096,9.339957],[-12.126067,9.3406557],[-12.1199731,9.3400205],[-12.1165184,9.3406346],[-12.1142868,9.3416297],[-12.1067551,9.346563],[-12.1009186,9.3514751],[-12.0995454,9.3535288],[-12.0996312,9.3553073],[-12.1027425,9.3606638],[-12.1044162,9.3646229],[-12.1045235,9.3684126],[-12.1030644,9.3740865],[-12.1010259,9.3818986],[-12.0991162,9.385667],[-12.0969704,9.3876358],[-12.0932797,9.3878475],[-12.089589,9.3862174],[-12.0827011,9.3835923],[-12.0758132,9.3819621],[-12.0716504,9.3806284],[-12.0674876,9.378977],[-12.0639471,9.3755474],[-12.0611147,9.3738748],[-12.0522097,9.3733667],[-12.0476607,9.373896],[-12.0429615,9.375505],[-12.0369748,9.3778973],[-12.0327691,9.3784054],[-12.0286707,9.3769235],[-12.0240143,9.3746158],[-12.0185426,9.3740442],[-12.0161823,9.3748275],[-12.0121912,9.3777703],[-12.0091013,9.3807342],[-12.0072988,9.3806707],[-12.0042733,9.3787442],[-12.0022134,9.3764577],[-12.0002822,9.3749757],[-11.9922901,9.3748194],[-11.9918455,9.3766147],[-11.9916936,9.3772016],[-11.9915669,9.3776908],[-11.9911698,9.3787142],[-11.9910335,9.3789832],[-11.9910157,9.3792288],[-11.9910928,9.3796908],[-11.9915669,9.3801586],[-11.9922582,9.3804456],[-11.9925139,9.3806784],[-11.9924844,9.3811441],[-11.9922091,9.3816291],[-11.9916978,9.3819784],[-11.9913241,9.3821918],[-11.9910587,9.382444],[-11.9907243,9.3837537],[-11.9904195,9.3844618],[-11.9902327,9.3849566],[-11.9899771,9.3860819],[-11.9898099,9.3869453],[-11.9894559,9.3874983],[-11.9893969,9.3879833],[-11.9899181,9.3886236],[-11.9906358,9.3896034],[-11.9909603,9.3898653],[-11.9913438,9.3899817],[-11.9921796,9.3900205],[-11.9928875,9.3902727],[-11.993566,9.3906608],[-11.9939298,9.3909324],[-11.9941658,9.3913592],[-11.9941953,9.3917764],[-11.99392,9.3928434],[-11.993743,9.394512],[-11.9934873,9.3958992],[-11.9932415,9.3971603],[-11.9927892,9.3981401],[-11.9925827,9.3987997],[-11.9922287,9.3993817],[-11.9919043,9.3999347],[-11.9916388,9.4001578],[-11.9911275,9.4006525],[-11.9906555,9.4008853],[-11.9900557,9.4010211],[-11.9896821,9.4011958],[-11.9893773,9.4015256],[-11.9891646,9.4022836],[-11.9894203,9.4030015],[-11.9899512,9.4037387],[-11.9900299,9.4043402],[-11.9899709,9.4049804],[-11.9899316,9.405931],[-11.9896562,9.4061445],[-11.9895579,9.4065131],[-11.9895579,9.4070757],[-11.9898529,9.4074637],[-11.9911508,9.4084143],[-11.9920161,9.4083561],[-11.992842,9.4081233],[-11.9940023,9.4078517],[-11.9946709,9.4078517],[-11.9949659,9.4079487],[-11.9957722,9.4089576],[-11.9958312,9.4096948],[-11.9956935,9.4103738],[-11.9953789,9.4116349],[-11.9943956,9.4137689],[-11.993845,9.4146904],[-11.9935205,9.4150202],[-11.9930878,9.4152337],[-11.9922816,9.4150979],[-11.9918981,9.4151852],[-11.9916818,9.4154665],[-11.9917998,9.4160388],[-11.9922521,9.4165335],[-11.9933632,9.4174744],[-11.9935795,9.4177557],[-11.9935795,9.4181049],[-11.993196,9.4187548],[-11.992547,9.4203941],[-11.9927044,9.4213835],[-11.993373,9.4234399],[-11.9935696,9.4240219],[-11.9939629,9.4247882],[-11.9942284,9.4249531],[-11.9943366,9.4253702],[-11.9943464,9.4257],[-11.9940908,9.4260686],[-11.9938253,9.4261947],[-11.9935303,9.4262917],[-11.9930485,9.4262335],[-11.9926749,9.4262432],[-11.9924094,9.4265051],[-11.9923012,9.4269998],[-11.9914065,9.4278631],[-11.9906592,9.4286391],[-11.9902462,9.4293083],[-11.9903544,9.4297739],[-11.9903544,9.4299388],[-11.9898234,9.4307245],[-11.9895383,9.4310737],[-11.9894694,9.4314229],[-11.9896464,9.4318206],[-11.9899807,9.4323929],[-11.9903445,9.4328197],[-11.9904527,9.4331979],[-11.990374,9.434003],[-11.9901774,9.435264],[-11.9899021,9.4359138],[-11.9893908,9.4368644],[-11.9890565,9.437233],[-11.9886337,9.4375531],[-11.9876504,9.4375919],[-11.9868244,9.4373979],[-11.9862345,9.4371263],[-11.9860083,9.4368935],[-11.9858903,9.4360399],[-11.9857035,9.4354483],[-11.9854577,9.4351282],[-11.9848087,9.4347402],[-11.9844646,9.4347693],[-11.984268,9.43507],[-11.9843761,9.4358751],[-11.9848874,9.4368644],[-11.9853889,9.4385036],[-11.9855265,9.4391632],[-11.9850447,9.4401526],[-11.9848972,9.4410061],[-11.9849169,9.4419179],[-11.9851431,9.4424319],[-11.9852905,9.442946],[-11.9853987,9.4433243],[-11.9852807,9.4437607],[-11.9851893,9.4438704],[-11.9850054,9.4440905],[-11.9846613,9.4442942],[-11.9845924,9.4445949],[-11.9845728,9.4448956],[-11.9847694,9.4453708],[-11.9848776,9.4454872],[-11.9855757,9.4458655],[-11.985792,9.4462147],[-11.9858018,9.4465154],[-11.9855659,9.4469809],[-11.9850349,9.4472913],[-11.9846023,9.4471943],[-11.9843073,9.4471264],[-11.9834066,9.4471899],[-11.9822733,9.446895],[-11.9813555,9.4466618],[-11.9808271,9.4467784],[-11.9800623,9.4470184],[-11.9798468,9.4474231],[-11.9798196,9.4475973],[-11.9797633,9.447958],[-11.9799302,9.4483353],[-11.9799997,9.4486645],[-11.9799372,9.4489594],[-11.9796938,9.4491034],[-11.9793948,9.4490622],[-11.9790124,9.4488771],[-11.9787552,9.4486027],[-11.9784632,9.4483764],[-11.9783797,9.4480883],[-11.978345,9.447814],[-11.9783241,9.4473614],[-11.9783937,9.4467578],[-11.9783867,9.4464835],[-11.9782337,9.4462709],[-11.9778931,9.4462229],[-11.9775941,9.4464012],[-11.9773368,9.446751],[-11.9772047,9.4471419],[-11.9771352,9.4474299],[-11.9771352,9.44791],[-11.9772882,9.4490211],[-11.9771769,9.4494189],[-11.9767737,9.4497892],[-11.9764677,9.450187],[-11.9762453,9.4505574],[-11.9763287,9.4510237],[-11.9768293,9.4523817],[-11.9771769,9.4535065],[-11.9774411,9.4544255],[-11.9774828,9.4549056],[-11.9770657,9.4554679],[-11.9764399,9.4559617],[-11.9763148,9.4562223],[-11.9762592,9.4566201],[-11.9764538,9.4569493],[-11.9767737,9.457498],[-11.9769962,9.4579095],[-11.9768849,9.4581152],[-11.9759115,9.4585816],[-11.9747157,9.4587873],[-11.9739648,9.4586502],[-11.9736727,9.4586776],[-11.9735059,9.4591302],[-11.9732278,9.4597886],[-11.9726437,9.4607625],[-11.9719763,9.461654],[-11.9719067,9.4622164],[-11.9719067,9.4626142],[-11.9722961,9.4629434],[-11.9729079,9.4635743],[-11.9732973,9.4642464],[-11.9737145,9.4651654],[-11.9737979,9.4663587],[-11.9737284,9.4677303],[-11.9737284,9.4685258],[-11.9738396,9.4693762],[-11.974076,9.470062],[-11.9741436,9.4715237],[-11.9736434,9.4746009],[-11.9735513,9.4775352],[-11.9742489,9.4799242],[-11.9742884,9.480885],[-11.9730379,9.4811317],[-11.9729194,9.4819886],[-11.9727088,9.4828975],[-11.9718927,9.4825859],[-11.9710107,9.4820016],[-11.9697493,9.4809859],[-11.9696097,9.4816193],[-11.9696004,9.482822],[-11.9696795,9.4835932],[-11.9697307,9.4843093],[-11.9698237,9.4848234],[-11.9697167,9.4855395],[-11.9693909,9.4861959],[-11.9688836,9.4867697],[-11.9684182,9.4869717],[-11.9680366,9.4872701],[-11.9679078,9.487598],[-11.9689317,9.4888099],[-11.9690992,9.4902971],[-11.969546,9.4919129],[-11.9694901,9.4931614],[-11.97003,9.4937123],[-11.9710166,9.493749],[-11.9711574,9.4941351],[-11.9710969,9.494741],[-11.9710364,9.495526],[-11.971204,9.4961915],[-11.971055,9.4968479],[-11.9712226,9.4972978],[-11.9711994,9.4976501],[-11.9489143,9.5248351],[-11.9279304,9.5329875],[-11.8929571,9.5329875],[-11.8738808,9.5166826],[-11.8687938,9.5010041],[-11.8687938,9.4796802],[-11.873388,9.4734494],[-11.8738808,9.472781],[-11.8738808,9.4621183],[-11.8601468,9.4480955],[-11.8376358,9.42511],[-11.8357282,9.4131912],[-11.8230106,9.395626],[-11.8230106,9.3667668],[-11.8280976,9.362375],[-11.8266285,9.3428714],[-11.8202813,9.2916249],[-11.8147442,9.246913],[-11.8161715,9.2398692],[-11.8179236,9.2312223],[-11.8096572,9.2086265],[-11.8307458,9.1697509],[-11.8312885,9.1365342],[-11.8258618,9.0909902],[-11.796558,9.0786655],[-11.777438,9.0773741],[-11.7687438,9.0693303],[-11.7627696,9.0563699],[-11.7651485,9.0564262],[-11.7670442,9.0559206],[-11.7687312,9.0551064],[-11.7696696,9.0543015],[-11.7696697,9.053721],[-11.7687124,9.0513735],[-11.7683048,9.0496962],[-11.7681247,9.0481145],[-11.7679256,9.046439],[-11.7678215,9.0445107],[-11.7685134,9.0434155],[-11.7691578,9.0424983],[-11.7699161,9.0417868],[-11.7706837,9.0419273],[-11.7717549,9.0425263],[-11.7727785,9.0430598],[-11.7734987,9.0431723],[-11.7751101,9.0429756],[-11.7772615,9.0423579],[-11.7786833,9.0417868],[-11.7808348,9.0408509],[-11.7815362,9.039868],[-11.7819532,9.038567],[-11.7820964,9.0377912],[-11.7820954,9.0371068],[-11.7816879,9.0359179],[-11.7814129,9.03545],[-11.7808537,9.0348509],[-11.7806452,9.0344858],[-11.7805695,9.0334093],[-11.7806926,9.0324546],[-11.7811003,9.0318835],[-11.7817731,9.0317993],[-11.7829485,9.0315372],[-11.7838678,9.0315747],[-11.7849577,9.0316964],[-11.7858676,9.0315841],[-11.7863416,9.0312563],[-11.7871756,9.0307603],[-11.7874126,9.0303672],[-11.7876306,9.029974],[-11.7879339,9.028935],[-11.7878012,9.0277649],[-11.7879812,9.0251065],[-11.7883225,9.0242453],[-11.7896968,9.0234215],[-11.7909195,9.0225042],[-11.7922843,9.021746],[-11.7934311,9.0214464],[-11.7949382,9.0214745],[-11.7963504,9.0213154],[-11.7974025,9.0209035],[-11.7985778,9.0203886],[-11.7991275,9.0197146],[-11.7993455,9.0186475],[-11.7995147,9.0180191],[-11.7994876,9.0174025],[-11.7990232,9.0168221],[-11.7984071,9.0156146],[-11.7982555,9.0151465],[-11.7981986,9.0147908],[-11.7983029,9.0143976],[-11.7985778,9.0138921],[-11.7995919,9.0137517],[-11.8016013,9.0132743],[-11.8030988,9.0129092],[-11.8044636,9.0131245],[-11.8054399,9.0134615],[-11.8066341,9.0136768],[-11.80798,9.0145474],[-11.8083117,9.0151559],[-11.8091363,9.0154648],[-11.8096482,9.0155116],[-11.8107287,9.0159515],[-11.8112879,9.0165507],[-11.8121693,9.0174493],[-11.8132119,9.0179735],[-11.8144441,9.018142],[-11.8156857,9.0178425],[-11.8165578,9.0179548],[-11.8173728,9.0183199],[-11.8175624,9.0189845],[-11.8172117,9.0198738],[-11.8172117,9.0207163],[-11.8175813,9.0213996],[-11.8181216,9.0227476],[-11.8182164,9.0246197],[-11.8184249,9.025612],[-11.8191357,9.0267446],[-11.820093,9.0278024],[-11.8211356,9.0290099],[-11.8221877,9.0295154],[-11.8229271,9.029637],[-11.823363,9.0292439],[-11.8236757,9.0285699],[-11.8237231,9.0273343],[-11.8235525,9.025743],[-11.8231544,9.0244606],[-11.822491,9.0238896],[-11.8216095,9.0231875],[-11.8211356,9.0224106],[-11.8206807,9.0215868],[-11.8205764,9.0202389],[-11.8206427,9.0190407],[-11.8210313,9.0184041],[-11.8213631,9.0179173],[-11.8218749,9.0174493],[-11.8226521,9.0176178],[-11.8232303,9.0183199],[-11.8235999,9.0189471],[-11.8244529,9.0197427],[-11.8253913,9.0207163],[-11.8266139,9.0216711],[-11.8280925,9.022317],[-11.8290688,9.0226352],[-11.8299407,9.0225884],[-11.8309265,9.0225135],[-11.8314762,9.0222982],[-11.8319501,9.0219144],[-11.8325662,9.0212405],[-11.8332676,9.020164],[-11.8334192,9.0194993],[-11.8333149,9.0190407],[-11.8328505,9.0185539],[-11.8323292,9.0177769],[-11.8318648,9.016766],[-11.8313151,9.0158486],[-11.8309644,9.014641],[-11.8308412,9.0130964],[-11.8305473,9.0120012],[-11.830244,9.0111961],[-11.8298081,9.0105689],[-11.8292678,9.0096703],[-11.8292678,9.0090899],[-11.8295616,9.0083878],[-11.8301493,9.0075921],[-11.8307748,9.0070866],[-11.8313056,9.0061973],[-11.8318178,9.0053283],[-11.8323679,9.0050391],[-11.8331153,9.0050529],[-11.8338466,9.0047648],[-11.834268,9.0042056],[-11.8344825,9.0039143],[-11.8349778,9.0027091],[-11.8369688,9.000412],[-11.8396656,8.9975875],[-11.8410321,8.9965596],[-11.8418058,8.9961529],[-11.8424981,8.9961037],[-11.8433443,8.9962155],[-11.843833,8.9974355],[-11.8439189,8.9983875],[-11.84448,8.9993841],[-11.8449778,9.0000232],[-11.8459732,9.0004075],[-11.8467967,9.0006085],[-11.8480592,9.0005148],[-11.8515388,9.0003539],[-11.8525255,9.0001146],[-11.8533339,8.999637],[-11.8540941,8.9988459],[-11.8558973,8.9974614],[-11.8608766,8.9950638],[-11.865568,8.9930474],[-11.8670729,8.9922138],[-11.8677963,8.99156],[-11.8686694,8.9903267],[-11.8698603,8.9886981],[-11.8701285,8.9874314],[-11.8701874,8.9860225],[-11.8698668,8.9851371],[-11.8689966,8.9848527],[-11.8678074,8.9848412],[-11.8669551,8.9842646],[-11.8662943,8.983418],[-11.8657577,8.9822741],[-11.8659148,8.9811237],[-11.8666541,8.9802253],[-11.8667196,8.9784933],[-11.8672823,8.9773364],[-11.8677861,8.97585],[-11.8681591,8.9749581],[-11.86865,8.9743132],[-11.869435,8.9738464],[-11.8708286,8.9735297],[-11.8722877,8.9725086],[-11.8734982,8.9720691],[-11.8745124,8.9721984],[-11.8757621,8.9728964],[-11.8767632,8.9732001],[-11.8790075,8.9733487],[-11.880833,8.9735491],[-11.8820611,8.9734212],[-11.8830511,8.9732777],[-11.8837839,8.9729352],[-11.8845429,8.9720433],[-11.8854655,8.9711772],[-11.8861787,8.9706473],[-11.8865385,8.9698975],[-11.8864666,8.9691672],[-11.88593,8.9679457],[-11.8856199,8.9659899],[-11.8854066,8.9649597],[-11.8848373,8.9643587],[-11.8839344,8.964126],[-11.8829202,8.9638351],[-11.8817032,8.9628269],[-11.8808003,8.961935],[-11.8800478,8.9609655],[-11.8796356,8.9600542],[-11.8797534,8.959479],[-11.8801852,8.9588003],[-11.8804862,8.9579794],[-11.8808853,8.9571263],[-11.880716,8.9557996],[-11.8802576,8.9553721],[-11.8792072,8.9549755],[-11.8773741,8.9546253],[-11.8746846,8.9537331],[-11.873186,8.9528806],[-11.8721502,8.9519663],[-11.8720018,8.9514795],[-11.8718479,8.9507525],[-11.8721222,8.9502437],[-11.8728381,8.9497348],[-11.8741761,8.9483734],[-11.8750057,8.94723],[-11.8751663,8.9462784],[-11.8749254,8.944983],[-11.8744036,8.9444675],[-11.873487,8.9442759],[-11.8724902,8.9444477],[-11.8718078,8.9447187],[-11.8710518,8.9445336],[-11.8705078,8.9438509],[-11.8702366,8.9429825],[-11.8702699,8.942069],[-11.870637,8.9409714],[-11.8713328,8.9397289],[-11.8716405,8.9386516],[-11.8715402,8.9371514],[-11.871781,8.9357767],[-11.8721757,8.9342302],[-11.8725036,8.9328819],[-11.8723296,8.9315138],[-11.8720486,8.9303837],[-11.8721624,8.9292403],[-11.8725838,8.9280176],[-11.8732462,8.926471],[-11.8738149,8.9251492],[-11.8738818,8.9243032],[-11.8734536,8.9226839],[-11.8733595,8.9211623],[-11.8737948,8.919604],[-11.8739687,8.9176872],[-11.8737814,8.9158564],[-11.8732863,8.9139463],[-11.8727779,8.9124195],[-11.8725761,8.9111527],[-11.872847,8.9086458],[-11.8732146,8.9054918],[-11.8732533,8.9043926],[-11.8730695,8.9037332],[-11.8724794,8.9032553],[-11.8714055,8.9028443],[-11.8709122,8.902223],[-11.8693256,8.8983999],[-11.8683872,8.8966317],[-11.868155,8.8956855],[-11.8684839,8.8941657],[-11.8690547,8.8925122],[-11.8687838,8.8909638],[-11.8685806,8.8892051],[-11.8683098,8.883929],[-11.8676519,8.8817784],[-11.8673617,8.8805358],[-11.8674391,8.8794175],[-11.8675358,8.8785668],[-11.8679808,8.8777065],[-11.8684065,8.8774293],[-11.8691321,8.8777256],[-11.8697222,8.8778308],[-11.8709025,8.8774006],[-11.8716184,8.8770183],[-11.8719473,8.875986],[-11.8718506,8.8742846],[-11.8720924,8.872153],[-11.8725471,8.8708817],[-11.8739499,8.8694002],[-11.8751205,8.8684347],[-11.8760686,8.8667428],[-11.8773262,8.8646208],[-11.8779454,8.8638561],[-11.8792417,8.8631105],[-11.880896,8.8625943],[-11.8823375,8.8621738],[-11.8835275,8.8615142],[-11.8842724,8.860912],[-11.8846207,8.8604149],[-11.8844078,8.8597936],[-11.8833823,8.8585987],[-11.8817667,8.8572796],[-11.8805995,8.8561795],[-11.8805117,8.8554479],[-11.8804735,8.85472],[-11.8807219,8.8542494],[-11.8817087,8.853609],[-11.8824246,8.8527678],[-11.8825987,8.8520699],[-11.8823472,8.851114],[-11.8819796,8.8499861],[-11.8820183,8.8492691],[-11.8825407,8.8481794],[-11.8829663,8.847233],[-11.8831889,8.8464492],[-11.8830824,8.8452829],[-11.882918,8.8440976],[-11.8830728,8.8434762],[-11.8841001,8.841739],[-11.8847432,8.839995],[-11.8847021,8.8391704],[-11.883977,8.8383727],[-11.8836635,8.8378546],[-11.8831835,8.8370614],[-11.8826773,8.8361421],[-11.8826773,8.8341277],[-11.8830467,8.8324784],[-11.8842643,8.8300584],[-11.8853607,8.8291569],[-11.8857874,8.8282722],[-11.8864799,8.8260327],[-11.8862071,8.8232956],[-11.8856335,8.8223072],[-11.8853537,8.8201853],[-11.8847926,8.8178567],[-11.8848579,8.8169225],[-11.8851019,8.8146265],[-11.8845563,8.8113226],[-11.8841908,8.8095957],[-11.883594,8.8082506],[-11.8830279,8.807359],[-11.8825845,8.8064297],[-11.8825366,8.8056264],[-11.8826538,8.8046039],[-11.8828296,8.8029495],[-11.8833533,8.8011478],[-11.8838709,8.7998897],[-11.8850048,8.7989357],[-11.8851373,8.7983572],[-11.8851159,8.7964059],[-11.88506,8.7945949],[-11.8841506,8.7935165],[-11.8822621,8.7930603],[-11.8813808,8.7925626],[-11.8805694,8.7911801],[-11.8802896,8.7888575],[-11.8804994,8.7855395],[-11.8807093,8.7839772],[-11.8817025,8.7821937],[-11.8829196,8.7804517],[-11.8834931,8.7795669],[-11.8846403,8.7792351],[-11.8854231,8.7794549],[-11.886263,8.7803411],[-11.8870899,8.7814099],[-11.8879138,8.7817928],[-11.8882845,8.7817997],[-11.8886692,8.7815992],[-11.889005,8.7808942],[-11.8891048,8.7802333],[-11.8893106,8.7785929],[-11.8893063,8.7773369],[-11.8883873,8.7764776],[-11.887436,8.776132],[-11.8870723,8.7753854],[-11.8869744,8.7735466],[-11.8871702,8.7707123],[-11.8877718,8.7695924],[-11.8883092,8.7693378],[-11.8892954,8.76893],[-11.889929,8.7682312],[-11.8919256,8.7666925],[-11.8935897,8.7647012],[-11.8960576,8.7635616],[-11.8974231,8.7619322],[-11.8992336,8.7600029],[-11.9009192,8.7569892],[-11.9012839,8.7554801],[-11.9013411,8.7543491],[-11.901806,8.7535291],[-11.9028859,8.7528505],[-11.904252,8.7524688],[-11.9056109,8.7524405],[-11.9065764,8.7525395],[-11.9071199,8.7530908],[-11.9075133,8.7541935],[-11.9081498,8.7549852],[-11.9087291,8.7552963],[-11.9095945,8.7552963],[-11.9100165,8.7549358],[-11.9103956,8.753112],[-11.9105744,8.7518043],[-11.9114469,8.7497685],[-11.9117115,8.7483618],[-11.913049,8.7475065],[-11.9147368,8.7468844],[-11.9161315,8.7471177],[-11.9174403,8.7483901],[-11.9179435,8.7490499],[-11.918558,8.7495568],[-11.9202737,8.7502485],[-11.9210504,8.7502485],[-11.9215069,8.7488479],[-11.9215098,8.7477115],[-11.9227328,8.7462553],[-11.9242859,8.7449761],[-11.9270956,8.7430275],[-11.9347405,8.7388276],[-11.9392177,8.7361272],[-11.9429356,8.7340248],[-11.9439582,8.733848],[-11.9454602,8.7333885],[-11.9460569,8.7328985],[-11.946649,8.7319521],[-11.9473779,8.7314151],[-11.9488337,8.7295276],[-11.9494204,8.728463],[-11.9503863,8.7274532],[-11.9516409,8.7264394],[-11.9561916,8.7244906],[-11.9596305,8.7234809],[-11.9630533,8.7222179],[-11.9670115,8.7202451],[-11.9712169,8.7178024],[-11.9735917,8.7150733],[-11.981917,8.7107485],[-11.9894955,8.7082886],[-11.992934,8.7057761],[-11.9948282,8.7043373],[-11.9969483,8.7015418],[-11.9978839,8.6996077],[-11.999051,8.6957232],[-11.9995367,8.6930349],[-11.9995886,8.6898518],[-12.0002129,8.6862603],[-12.0004976,8.6852262],[-12.0009224,8.6845563],[-12.0015495,8.6837964],[-12.0043007,8.6821466],[-12.0064753,8.6808568],[-12.0085184,8.6799569],[-12.0100659,8.679527],[-12.0113812,8.6794544],[-12.0132722,8.679437],[-12.0149334,8.6797694],[-12.0159526,8.6800769],[-12.0177631,8.6808567],[-12.0193915,8.6824265],[-12.0203321,8.6833764],[-12.0209934,8.6836581],[-12.0215054,8.6836764],[-12.0228304,8.6831865],[-12.0245701,8.6827265],[-12.0259558,8.6825165],[-12.0265121,8.6825365],[-12.0268155,8.6828165],[-12.026781,8.6833202],[-12.0259963,8.6854761],[-12.0257434,8.6870159],[-12.0258749,8.6878658],[-12.0261379,8.6882857],[-12.0268054,8.6886756],[-12.0275236,8.6887356],[-12.0280799,8.6886456],[-12.0288991,8.6881256],[-12.0294858,8.6872958],[-12.0305276,8.6843463],[-12.0313671,8.6826465],[-12.03251,8.6809968],[-12.034189,8.679497],[-12.0351196,8.678937],[-12.0361917,8.6787171],[-12.037628,8.6786971],[-12.0386799,8.679137],[-12.0394276,8.6795195],[-12.0404196,8.6804068],[-12.0407938,8.6810967],[-12.0409253,8.6819766],[-12.0405409,8.6832964],[-12.0403083,8.6853761],[-12.0398531,8.6874458],[-12.0397014,8.6889656],[-12.0398936,8.6896955],[-12.0406623,8.6907453],[-12.0412793,8.6912552],[-12.0423413,8.6916951],[-12.0438888,8.6920351],[-12.0451633,8.6921251],[-12.0470345,8.692245],[-12.0490776,8.6921551],[-12.0502913,8.6919351],[-12.0527873,8.6914391],[-12.0538319,8.6909279],[-12.0552694,8.6899465],[-12.0561071,8.6890059],[-12.0568931,8.6878405],[-12.0576689,8.6864807],[-12.0582583,8.6859491],[-12.0590339,8.6856424],[-12.059944,8.6855811],[-12.0605025,8.685806],[-12.0611127,8.6863683],[-12.0615988,8.6871657],[-12.0619005,8.6882783],[-12.0622917,8.6893944],[-12.0629432,8.6928295],[-12.0630777,8.6939745],[-12.0628812,8.6956102],[-12.0623951,8.6974912],[-12.0617849,8.6992292],[-12.0609576,8.7007115],[-12.0602957,8.7022245],[-12.060306,8.7031037],[-12.060699,8.7037477],[-12.0611851,8.7040749],[-12.0618366,8.7042895],[-12.0642877,8.7042998],[-12.0684556,8.7042078],[-12.0689841,8.7040664],[-12.0701723,8.7036864],[-12.0714237,8.7031037],[-12.0724269,8.7022961],[-12.0731302,8.701284],[-12.0739265,8.6988202],[-12.0746401,8.6956817],[-12.0749297,8.6925432],[-12.0749193,8.6903554],[-12.0744643,8.6889548],[-12.0738541,8.6873089],[-12.0726544,8.6855198],[-12.0719201,8.6842112],[-12.071703,8.6832706],[-12.0716823,8.6822482],[-12.0719098,8.6813383],[-12.0724579,8.6806227],[-12.0730991,8.6803058],[-12.0739886,8.6800502],[-12.0748469,8.6800297],[-12.0758398,8.6806022],[-12.0770912,8.6813895],[-12.077642,8.681834],[-12.0782358,8.6822819],[-12.0788099,8.6825922],[-12.0795984,8.6827587],[-12.0801879,8.6826906],[-12.0808189,8.6823109],[-12.0815279,8.6818904],[-12.083255,8.6813792],[-12.0851476,8.6802853],[-12.0876711,8.6786802],[-12.0906703,8.6773205],[-12.0947451,8.6756642],[-12.0965239,8.6749486],[-12.0984579,8.6746418],[-12.0991247,8.6746395],[-12.1009503,8.6746623],[-12.102174,8.6744774],[-12.1031532,8.6741307],[-12.1040943,8.6730163],[-12.1050457,8.6714316],[-12.1055835,8.6687018],[-12.10608,8.6668717],[-12.1067625,8.6656244],[-12.1075795,8.6644486],[-12.108469,8.6633751],[-12.1095032,8.6627821],[-12.1105787,8.6627208],[-12.1119749,8.6628946],[-12.1132367,8.66314],[-12.1146949,8.6630786],[-12.1162565,8.6627719],[-12.1181698,8.662138],[-12.1304987,8.7030157],[-12.1449009,8.7080618],[-12.1634148,8.735522],[-12.1857626,8.7210657],[-12.1945577,8.7234144],[-12.2040018,8.7217742],[-12.2062241,8.723239],[-12.2070132,8.7249621],[-12.209474,8.7280033],[-12.211504,8.7287187],[-12.2144343,8.7273752],[-12.217327,8.7251762],[-12.2190063,8.7236063],[-12.2204008,8.7210239],[-12.2208068,8.7181973],[-12.2203863,8.7166314],[-12.2197761,8.7156987],[-12.2201086,8.7149362],[-12.2202178,8.7140014],[-12.2208853,8.7135578],[-12.2231536,8.7137323],[-12.2247219,8.7135432],[-12.2276428,8.7152458],[-12.2298146,8.7155913],[-12.231662,8.7186758],[-12.2344782,8.7196543],[-12.2345852,8.7196914],[-12.2376285,8.7207485],[-12.2417534,8.7210586],[-12.2481321,8.7300276],[-12.2494555,8.7308887],[-12.2505352,8.7351673],[-12.2515487,8.737457],[-12.2530586,8.7399308],[-12.2550298,8.7424234],[-12.2564192,8.7442014],[-12.2572383,8.7448664],[-12.2582475,8.7453724],[-12.2593151,8.7454013],[-12.2602805,8.7451266],[-12.2612019,8.7442882],[-12.2616992,8.7432618],[-12.2626352,8.7403128],[-12.2630155,8.7381877],[-12.2627522,8.7309885],[-12.2622403,8.7271142],[-12.2625913,8.7240494],[-12.2631471,8.7212014],[-12.2637175,8.7192787],[-12.2647413,8.7171824],[-12.2659845,8.7151295],[-12.2673301,8.7138862],[-12.2690267,8.7125996],[-12.2707087,8.7119056],[-12.2738971,8.7107346],[-12.2763689,8.7103009],[-12.2778754,8.7101418],[-12.2790016,8.7103587],[-12.2799961,8.7111105],[-12.280157,8.7118622],[-12.2799961,8.7137561],[-12.2801863,8.7157801],[-12.2802009,8.7172981],[-12.2798645,8.7188739],[-12.2790747,8.7198714],[-12.2776267,8.7208978],[-12.2746431,8.7220544],[-12.2720982,8.7227628],[-12.2713084,8.7234856],[-12.2709427,8.7249746],[-12.2708111,8.7264637],[-12.2712206,8.7294562],[-12.2717618,8.7342412],[-12.2715716,8.7370168],[-12.2709866,8.7388383],[-12.2688512,8.7431462],[-12.2672716,8.7453001],[-12.2665549,8.7469914],[-12.2665842,8.748119],[-12.2669498,8.7491019],[-12.2679883,8.7499404],[-12.2690609,8.7506513],[-12.2694216,8.7508655],[-12.2707526,8.7520654],[-12.2721713,8.7530194],[-12.2734876,8.7532941],[-12.2746138,8.7532941],[-12.276559,8.7528026],[-12.2787383,8.7511691],[-12.2810638,8.7493477],[-12.2830383,8.7472083],[-12.2842961,8.7457193],[-12.2856856,8.7442593],[-12.2868849,8.743869],[-12.2880842,8.7438111],[-12.2893713,8.7442159],[-12.290907,8.7451122],[-12.2927646,8.7467745],[-12.2934666,8.7477865],[-12.2939346,8.7494778],[-12.2950023,8.7540891],[-12.2959676,8.7570236],[-12.297123,8.7594665],[-12.2979128,8.7602038],[-12.299039,8.7607675],[-12.3011159,8.7614469],[-12.3023445,8.7616782],[-12.3033829,8.7615336],[-12.3043921,8.7611433],[-12.3052111,8.7603628],[-12.3056353,8.7595099],[-12.3068492,8.7569224],[-12.3076244,8.7558816],[-12.3089407,8.7525424],[-12.3094819,8.7488996],[-12.3095696,8.7422788],[-12.3101818,8.7395314],[-12.3112409,8.7373443],[-12.3127475,8.7347132],[-12.3142685,8.7328918],[-12.3162283,8.7310558],[-12.3182174,8.7299138],[-12.3209086,8.728497],[-12.3214706,8.7317507],[-12.3311687,8.7322226],[-12.3373474,8.7351284],[-12.3442736,8.7445845],[-12.3522077,8.7563826],[-12.363573,8.7609241],[-12.3642639,8.7622987],[-12.3709017,8.7727638],[-12.3720556,8.7841439],[-12.3700615,8.7912056],[-12.3659071,8.7918625],[-12.3592696,8.7977265],[-12.3520042,8.7979557],[-12.3504639,8.7968372],[-12.3500081,8.796476],[-12.3495955,8.7958043],[-12.3490729,8.7949772],[-12.3484927,8.7946315],[-12.3474619,8.7945888],[-12.3466289,8.7944685],[-12.3457683,8.7945345],[-12.3446131,8.7946432],[-12.3430728,8.7944801],[-12.3414573,8.7940687],[-12.3399602,8.7938513],[-12.3387776,8.7939445],[-12.3378934,8.7942823],[-12.3370958,8.7947755],[-12.3363924,8.7951444],[-12.3360152,8.7951444],[-12.3357952,8.7953735],[-12.3358227,8.7955987],[-12.3356891,8.7958317],[-12.3352333,8.796053],[-12.3345692,8.7964064],[-12.3344749,8.7969694],[-12.3344099,8.7972653],[-12.3341654,8.7972557],[-12.3339584,8.7973106],[-12.3339167,8.7974712],[-12.3340417,8.7977389],[-12.3340459,8.7978899],[-12.3338181,8.797975],[-12.3335722,8.7979572],[-12.3332613,8.7978083],[-12.3331189,8.7978743],[-12.3329776,8.7980894],[-12.3327081,8.7982789],[-12.3325886,8.7986825],[-12.3324441,8.7990202],[-12.3320663,8.7993717],[-12.3317106,8.7997945],[-12.3251771,8.8037575],[-12.3228563,8.8094286],[-12.3208668,8.8151091],[-12.3208246,8.8152295],[-12.3208866,8.8161423],[-12.320869,8.8169383],[-12.3206056,8.8175945],[-12.3200909,8.8184953],[-12.3192972,8.8194621],[-12.3189946,8.8201416],[-12.3188375,8.8207395],[-12.3189435,8.821357],[-12.3191951,8.8218889],[-12.3194622,8.8224053],[-12.3194111,8.8228557],[-12.3191989,8.8234576],[-12.3191173,8.8240025],[-12.3190653,8.824836],[-12.3188257,8.8257601],[-12.3186725,8.8264046],[-12.3187824,8.8269598],[-12.3189985,8.8275617],[-12.3193836,8.8280936],[-12.3198316,8.8291419],[-12.3200595,8.8298214],[-12.3201538,8.8304815],[-12.3203856,8.8312347],[-12.3205232,8.8324578],[-12.3207078,8.8334789],[-12.3206213,8.8342011],[-12.320421,8.8345855],[-12.3204917,8.8349155],[-12.3208964,8.835529],[-12.3211047,8.8358707],[-12.3211283,8.8366123],[-12.3212107,8.8370627],[-12.321474,8.837447],[-12.321808,8.8375325],[-12.3222402,8.8378664],[-12.3228846,8.8387011],[-12.3234859,8.8394582],[-12.3242913,8.8399242],[-12.3256862,8.8409531],[-12.3259305,8.8419829],[-12.328953,8.8471796],[-12.3293137,8.8481501],[-12.3294304,8.8488584],[-12.329786,8.8493636],[-12.3298416,8.8497314],[-12.3298899,8.850006],[-12.3292857,8.8508901],[-12.3292394,8.8514684],[-12.3296856,8.8518425],[-12.3298585,8.8526159],[-12.3300103,8.853941],[-12.3301008,8.854234],[-12.3300192,8.8544904],[-12.3297523,8.85456],[-12.3295559,8.8546552],[-12.3296708,8.8548603],[-12.3300009,8.8549458],[-12.3305455,8.8549665],[-12.3309106,8.8557567],[-12.3311095,8.8559449],[-12.333717,8.8571847],[-12.3345931,8.8572811],[-12.3348674,8.8576254],[-12.3350601,8.8586765],[-12.3352105,8.8609011],[-12.3357097,8.8612819],[-12.3366606,8.861326],[-12.3371469,8.8616612],[-12.3386629,8.8635693],[-12.3393305,8.8639858],[-12.340468,8.8642322],[-12.3410091,8.8643164],[-12.3415761,8.8648867],[-12.3417652,8.8654737],[-12.341743,8.8659974],[-12.3414984,8.866609],[-12.3411796,8.8678049],[-12.3412502,8.8687831],[-12.3418189,8.8707198],[-12.3424139,8.8726553],[-12.3426363,8.8737466],[-12.3428276,8.8747292],[-12.3440003,8.8769107],[-12.3450202,8.8776782],[-12.3453275,8.8784485],[-12.3443711,8.8812706],[-12.3443005,8.8817594],[-12.3445748,8.8825467],[-12.3447008,8.8834037],[-12.344657,8.8838651],[-12.344434,8.8842752],[-12.3440744,8.8848648],[-12.3449739,8.8861537],[-12.3460608,8.8887078],[-12.3459929,8.890741],[-12.346011,8.8912187],[-12.3467071,8.8916212],[-12.3472828,8.8919641],[-12.3474386,8.8931268],[-12.3477187,8.8939459],[-12.3482799,8.8947066],[-12.348716,8.8953596],[-12.3494013,8.8951118],[-12.3498932,8.8952097],[-12.3502255,8.8958567],[-12.3509922,8.8964311],[-12.3523532,8.8976248],[-12.3526648,8.8983223],[-12.352387,8.8993478],[-12.3526411,8.9004039],[-12.3534145,8.9016837],[-12.3535823,8.9028283],[-12.3540456,8.9035856],[-12.3546255,8.9042112],[-12.3553333,8.9045841],[-12.3546595,8.9047509],[-12.3536788,8.9047417],[-12.3531464,8.9044833],[-12.3526887,8.9040127],[-12.3524646,8.9034406],[-12.3522778,8.9030854],[-12.3519697,8.9028784],[-12.3515383,8.9029149],[-12.3511316,8.9031219],[-12.3507865,8.9031706],[-12.3503305,8.9030245],[-12.3500717,8.902781],[-12.3497636,8.9025618],[-12.3493323,8.9026227],[-12.3489379,8.9030367],[-12.3486175,8.9035481],[-12.3481861,8.9039255],[-12.3476747,8.904309],[-12.347165,8.9046727],[-12.3464855,8.9048685],[-12.3460325,8.9051342],[-12.3455795,8.9055258],[-12.3453247,8.9059734],[-12.3450981,8.9062531],[-12.3447159,8.906351],[-12.3440364,8.9064769],[-12.3432861,8.9068126],[-12.3425358,8.9069244],[-12.3421394,8.9070363],[-12.3417005,8.9071622],[-12.3412617,8.9072461],[-12.3408794,8.9074559],[-12.3404264,8.9076937],[-12.3399875,8.9078615],[-12.3395345,8.9079314],[-12.3392089,8.9079734],[-12.3389966,8.9081272],[-12.3387417,8.9082391],[-12.3384303,8.9082531],[-12.3378499,8.9082391],[-12.3375526,8.908379],[-12.3371987,8.9084769],[-12.3367173,8.908323],[-12.3365474,8.9081832],[-12.3362785,8.9081133],[-12.335967,8.9083091],[-12.3356556,8.9085188],[-12.3354149,8.9085049],[-12.3351742,8.9083091],[-12.3348769,8.9081692],[-12.3346221,8.9080853],[-12.3343531,8.9078895],[-12.33407,8.9077496],[-12.3336736,8.9077916],[-12.3332914,8.9077356],[-12.3329516,8.9077496],[-12.3326119,8.9078895],[-12.3322863,8.9079175],[-12.3319748,8.9077636],[-12.3315926,8.9075258],[-12.3309838,8.9074279],[-12.3305167,8.9073021],[-12.3299079,8.9071622],[-12.3295823,8.9072042],[-12.3291293,8.9073161],[-12.3284781,8.907386],[-12.3279968,8.907372],[-12.327657,8.907372],[-12.3273031,8.907414],[-12.3269916,8.9076377],[-12.3266802,8.9079175],[-12.3262555,8.9080014],[-12.3258166,8.9080853],[-12.3253211,8.9081412],[-12.3248964,8.908351],[-12.3243868,8.9084769],[-12.3240612,8.9084629],[-12.323594,8.9085468],[-12.3231693,8.9086727],[-12.3225464,8.9088685],[-12.3220367,8.9087846],[-12.3216262,8.9087286],[-12.3211449,8.9087007],[-12.3202388,8.9087147],[-12.3199274,8.9087147],[-12.3193753,8.9088265],[-12.3188515,8.9088265],[-12.3184126,8.9087147],[-12.3179454,8.9085608],[-12.3177472,8.9082671],[-12.3176623,8.9076377],[-12.3172942,8.9073161],[-12.3172234,8.9070362],[-12.3174641,8.9063929],[-12.3175422,8.9060458],[-12.3174207,8.9057321],[-12.3172153,8.9054645],[-12.3168977,8.9049662],[-12.3166549,8.9044125],[-12.3164214,8.9039881],[-12.3161412,8.9034437],[-12.3160011,8.9030007],[-12.3159357,8.902567],[-12.3158143,8.9021334],[-12.3155901,8.9015428],[-12.3153882,8.900921],[-12.315191,8.9005801],[-12.3149815,8.9000321],[-12.3149075,8.8995695],[-12.3149075,8.8991798],[-12.3148336,8.8987171],[-12.3146734,8.8981936],[-12.3144762,8.89767],[-12.3141804,8.8972439],[-12.3139339,8.8968664],[-12.3139093,8.8964524],[-12.3140941,8.8959045],[-12.314205,8.8952957],[-12.314205,8.8948087],[-12.3138969,8.8941634],[-12.3135765,8.8936276],[-12.3131328,8.8931162],[-12.3128001,8.8924952],[-12.3125659,8.8919108],[-12.3122332,8.8910706],[-12.3119744,8.8905349],[-12.3117279,8.8900965],[-12.3113951,8.8898408],[-12.3109391,8.8897556],[-12.3105817,8.8897191],[-12.3099778,8.8895486],[-12.3095095,8.8896704],[-12.3086592,8.8901209],[-12.3077472,8.8907297],[-12.3070447,8.8913142],[-12.3065517,8.8918743],[-12.306145,8.8926779],[-12.3056274,8.8931771],[-12.3049372,8.8935424],[-12.3040992,8.8939198],[-12.3033967,8.8945043],[-12.3029407,8.8949061],[-12.3021079,8.8955415],[-12.3015288,8.8958553],[-12.3008563,8.8961506],[-12.3003893,8.8963351],[-12.2999223,8.8966489],[-12.2997916,8.897018],[-12.2996608,8.8973686],[-12.2991564,8.8977377],[-12.2985587,8.8977931],[-12.2978862,8.8977377],[-12.2774441,8.9137358],[-12.2782588,8.9151625],[-12.2787894,8.9168086],[-12.278987,8.9195036],[-12.2793819,8.9221984],[-12.2800239,8.9246738],[-12.2802213,8.9260761],[-12.2799497,8.9269906],[-12.2793203,8.9273443],[-12.278271,8.9271369],[-12.2770244,8.9268687],[-12.2758394,8.926832],[-12.274815,8.927015],[-12.2720131,8.9283076],[-12.2707294,8.9288684],[-12.269495,8.9290636],[-12.2668289,8.9289417],[-12.2656193,8.9291855],[-12.2647059,8.9298073],[-12.2639776,8.9304171],[-12.2634715,8.9313193],[-12.2631012,8.9325509],[-12.2629531,8.9335387],[-12.2631753,8.93438],[-12.2638789,8.9351115],[-12.2647552,8.9358188],[-12.2666684,8.9368918],[-12.2688038,8.9388671],[-12.2707417,8.9405254],[-12.2736424,8.9424398],[-12.2747409,8.9433054],[-12.2751359,8.9440127],[-12.2751648,8.944845],[-12.274778,8.9459879],[-12.2734202,8.9480853],[-12.2725932,8.9492313],[-12.2722079,8.9495489],[-12.2718292,8.9498285],[-12.2714293,8.9499894],[-12.2710626,8.9499873],[-12.270725,8.949923],[-12.2703714,8.9497801],[-12.2699145,8.9493461],[-12.2693518,8.9489545],[-12.2688103,8.9487867],[-12.2683348,8.9487436],[-12.2678264,8.9487448],[-12.267335,8.9488412],[-12.2668,8.9490035],[-12.2662981,8.9492313],[-12.2638212,8.9507787],[-12.2634726,8.9511602],[-12.263274,8.9515602],[-12.2631485,8.9524758],[-12.2632864,8.9531574],[-12.2637678,8.9536939],[-12.2647799,8.9541573],[-12.2652576,8.9542484],[-12.265746,8.9542203],[-12.2662981,8.9540386],[-12.2668536,8.9539013],[-12.2675226,8.9538044],[-12.2681668,8.9538078],[-12.268733,8.9538778],[-12.2692482,8.9540354],[-12.269901,8.9543288],[-12.2704578,8.9547304],[-12.2708424,8.95507],[-12.2712725,8.9553765],[-12.2718156,8.955535],[-12.2722227,8.9555349],[-12.272658,8.955444],[-12.2732349,8.9552028],[-12.2738153,8.9549022],[-12.2753199,8.9541436],[-12.2772924,8.9529193],[-12.2781071,8.952411],[-12.2786366,8.9520572],[-12.280033,8.951764],[-12.2811153,8.9518157],[-12.2823896,8.9525228],[-12.2832973,8.9535401],[-12.2832624,8.9552988],[-12.2823023,8.9573681],[-12.2815343,8.9593856],[-12.2808942,8.9623565],[-12.2803388,8.9649169],[-12.2810113,8.964693],[-12.2817593,8.9643798],[-12.2821333,8.9637373],[-12.2824911,8.9625887],[-12.2830357,8.9621648],[-12.2843446,8.9621436],[-12.2856964,8.9620165],[-12.2870268,8.9618045],[-12.2879924,8.9619105],[-12.2885717,8.9619317],[-12.2894086,8.9612746],[-12.290224,8.9609355],[-12.2909965,8.9609355],[-12.2915329,8.9607023],[-12.2923268,8.9602784],[-12.2934212,8.9603632],[-12.2943868,8.960448],[-12.295288,8.960342],[-12.2961248,8.9599181],[-12.2966398,8.9595154],[-12.2971333,8.9589643],[-12.2975196,8.9587947],[-12.298056,8.9590279],[-12.2985066,8.9594094],[-12.2989787,8.9594518],[-12.2998156,8.9592822],[-12.3014463,8.9590067],[-12.3027553,8.9586251],[-12.30415,8.9580528],[-12.30518,8.9577773],[-12.3066176,8.9574806],[-12.3080768,8.9573322],[-12.3120679,8.9575441],[-12.3137845,8.9582224],[-12.3149003,8.9590914],[-12.3158874,8.9605116],[-12.3170675,8.9623132],[-12.3186339,8.9646447],[-12.3204793,8.9661708],[-12.321874,8.9671034],[-12.3227323,8.967824],[-12.3239769,8.9680572],[-12.3253798,8.968256],[-12.3271741,8.9684811],[-12.3283757,8.9687778],[-12.3306717,8.9694349],[-12.3327102,8.9700495],[-12.3340031,8.970186],[-12.3364064,8.9712246],[-12.3382732,8.9730686],[-12.3393461,8.9749549],[-12.3395821,8.9767353],[-12.3400756,8.9791727],[-12.3406765,8.9804444],[-12.342436,8.9816313],[-12.3427149,8.9830937],[-12.3427579,8.9850224],[-12.3425004,8.9865272],[-12.3412773,8.9869935],[-12.3409983,8.9886466],[-12.3412558,8.9901514],[-12.3422429,8.9923556],[-12.3423931,8.9949624],[-12.342951,8.9973149],[-12.3439809,9.0004939],[-12.3440882,9.0025285],[-12.3451397,9.0035458],[-12.3461482,9.0050293],[-12.3467919,9.0073818],[-12.3488089,9.0088653],[-12.3496029,9.0108362],[-12.353594,9.0133158],[-12.3551389,9.0141847],[-12.3565981,9.0146297],[-12.3582074,9.0151807],[-12.3587224,9.0157529],[-12.359173,9.0175543],[-12.3597309,9.0196523],[-12.360439,9.0206908],[-12.3608926,9.0214741],[-12.3608861,9.0222426],[-12.3608534,9.0228562],[-12.3608141,9.0232566],[-12.361043,9.0238249],[-12.3614354,9.0242447],[-12.3616381,9.0246386],[-12.3619912,9.0252844],[-12.362207,9.0256526],[-12.3624947,9.0260078],[-12.3627563,9.0265309],[-12.3630113,9.0270992],[-12.3630898,9.0274092],[-12.3630571,9.0276739],[-12.3630832,9.0279323],[-12.3632075,9.02821],[-12.3634298,9.0286039],[-12.3637633,9.0288041],[-12.3639071,9.0291076],[-12.3640445,9.0295533],[-12.3640379,9.0301216],[-12.3640772,9.0305607],[-12.3641556,9.0309676],[-12.3641099,9.0312582],[-12.363881,9.0316586],[-12.3635933,9.0320461],[-12.3630701,9.0324142],[-12.3626713,9.0325369],[-12.3620827,9.0325885],[-12.3616381,9.0326725],[-12.3612719,9.0326983],[-12.3607357,9.0325821],[-12.3601929,9.0324012],[-12.3597548,9.0323108],[-12.3593232,9.0322785],[-12.358872,9.0323108],[-12.3586824,9.0324852],[-12.3586105,9.0327823],[-12.3586039,9.0330858],[-12.3587282,9.0335443],[-12.3588328,9.033893],[-12.3588393,9.0340545],[-12.3587609,9.0341901],[-12.3586955,9.0344032],[-12.3587413,9.0346357],[-12.3589505,9.0350232],[-12.3592186,9.0355398],[-12.3593952,9.0360629],[-12.3595325,9.0365537],[-12.3596502,9.0370445],[-12.3597548,9.0374837],[-12.3598464,9.0377097],[-12.3600164,9.0380068],[-12.3599641,9.0383555],[-12.3597287,9.0389884],[-12.359454,9.0396277],[-12.3592971,9.039957],[-12.3591336,9.0402735],[-12.3590421,9.0405512],[-12.3589309,9.0410484],[-12.3590224,9.0414101],[-12.3592644,9.0417846],[-12.3595979,9.0419913],[-12.3599052,9.0423917],[-12.3602518,9.0427275],[-12.3605722,9.0429987],[-12.3608599,9.0432441],[-12.3610692,9.0435282],[-12.3611476,9.0437284],[-12.3610888,9.0439222],[-12.3610234,9.0441224],[-12.3610757,9.0443484],[-12.3612196,9.0445744],[-12.3614068,9.0448382],[-12.3615792,9.0449554],[-12.3617754,9.0450006],[-12.3620893,9.0449683],[-12.3623901,9.0450652],[-12.3627366,9.0451879],[-12.3629655,9.0452073],[-12.3632467,9.04533],[-12.3635671,9.0456851],[-12.3637764,9.046008],[-12.3639268,9.046247],[-12.3641818,9.0464536],[-12.3644957,9.0468088],[-12.3648357,9.0470994],[-12.3652215,9.04739],[-12.365555,9.0477064],[-12.3696519,9.0495389],[-12.369837,9.0499602],[-12.3700495,9.0500733],[-12.3704419,9.0500959],[-12.3706576,9.0501314],[-12.3709552,9.0502508],[-12.3712233,9.0504349],[-12.3714325,9.0507739],[-12.3716287,9.0510161],[-12.3717791,9.0511065],[-12.3719589,9.0510484],[-12.3721714,9.050916],[-12.3724232,9.0506771],[-12.3726815,9.0505188],[-12.3729496,9.0503768],[-12.3731163,9.0502315],[-12.3733158,9.050112],[-12.3734073,9.0500539],[-12.3736002,9.0500248],[-12.3739337,9.05007],[-12.3741332,9.0501023],[-12.3743849,9.0501895],[-12.3746269,9.0502638],[-12.3748394,9.0502993],[-12.3750519,9.0502864],[-12.3752481,9.0502056],[-12.3754508,9.0501023],[-12.3756437,9.0500087],[-12.3758072,9.0499312],[-12.3760099,9.0499344],[-12.3761636,9.0499893],[-12.3764382,9.0501314],[-12.3765966,9.0502213],[-12.3768011,9.0503445],[-12.3769973,9.0504413],[-12.3771477,9.0504413],[-12.3772621,9.0503639],[-12.3773798,9.0502508],[-12.377442,9.0501378],[-12.3775629,9.0500507],[-12.3776806,9.049999],[-12.3778735,9.0500571],[-12.3780141,9.0500636],[-12.3781776,9.0500539],[-12.3784196,9.0500216],[-12.3786386,9.0500377],[-12.3788806,9.0500829],[-12.3791029,9.0501637],[-12.3792794,9.0502347],[-12.3793873,9.0503219],[-12.379492,9.0504624],[-12.3795476,9.0506448],[-12.3795901,9.0508288],[-12.3796391,9.0509483],[-12.3796228,9.0510903],[-12.3795214,9.0512421],[-12.3794102,9.0513228],[-12.3792991,9.0514455],[-12.3792827,9.0515811],[-12.3792893,9.05172],[-12.379335,9.051904],[-12.3794037,9.0520945],[-12.3794789,9.052256],[-12.3795704,9.0523367],[-12.3797241,9.0524239],[-12.3799105,9.0524723],[-12.3801786,9.0524884],[-12.3804859,9.0525885],[-12.3808521,9.0527015],[-12.3810483,9.0527952],[-12.3811431,9.0529889],[-12.3812052,9.053273],[-12.3812804,9.0535313],[-12.3813556,9.0536799],[-12.3814602,9.0537864],[-12.3816499,9.053893],[-12.3818493,9.0539479],[-12.3820586,9.0538962],[-12.3822744,9.0538833],[-12.3824411,9.0538994],[-12.3826536,9.0539253],[-12.3827877,9.0539931],[-12.3828956,9.054119],[-12.3829871,9.0542869],[-12.383095,9.0544645],[-12.3832421,9.0545742],[-12.3834416,9.0546776],[-12.3836181,9.0547744],[-12.3837293,9.054839],[-12.3838535,9.0550069],[-12.3839157,9.0551522],[-12.3839549,9.0553169],[-12.3839713,9.0554234],[-12.3840595,9.055559],[-12.3841707,9.0556494],[-12.3843538,9.0556979],[-12.3844156,9.0557234],[-12.3846546,9.0558722],[-12.3848377,9.0559949],[-12.3850829,9.0560756],[-12.3852922,9.0561951],[-12.385557,9.0563469],[-12.3858382,9.0566439],[-12.3860441,9.0568893],[-12.3863123,9.0573058],[-12.3866032,9.0576965],[-12.3868158,9.0580097],[-12.3870708,9.0584197],[-12.3874108,9.059059],[-12.387522,9.0597564],[-12.3876266,9.0606282],[-12.3876528,9.0614871],[-12.3877705,9.0621263],[-12.3880582,9.063095],[-12.3882936,9.0636439],[-12.3885028,9.0641411],[-12.3886925,9.0647093],[-12.3888363,9.0651226],[-12.3888887,9.0652195],[-12.3890914,9.0657942],[-12.3891437,9.0665691],[-12.3888298,9.0673569],[-12.3884309,9.0680349],[-12.3878947,9.0686096],[-12.3872539,9.0694813],[-12.3868158,9.0700431],[-12.3862796,9.070818],[-12.3858937,9.0712636],[-12.3855799,9.0714767],[-12.3852856,9.0716639],[-12.3848475,9.0716252],[-12.3843571,9.0716898],[-12.384102,9.0717672],[-12.3837187,9.0721276]]]]}]}
