# Supplementary material
Source: ML conference proceedings conference paper supplement (https://proceedings.neurips.cc/paper_files/paper/2022/hash/9d3faa41886997cfc2128b930077fa49-Abstract.html)
Supplement: Supplementary file 1 [file 9d3faa41886997cfc2128b930077fa49-Supplemental-Conference.zip › code/ebola/map/geojson/bomi.geojson]

{"type":"GeometryCollection","geometries":[{"type":"MultiPolygon","coordinates":[[[[-11.0593432,6.5776068],[-11.0577527,6.5770872],[-11.0574174,6.5769087],[-11.0571921,6.5767328],[-11.0565913,6.5762505],[-11.0563499,6.5759707],[-11.0561031,6.5756243],[-11.05602,6.5754898],[-11.0559703,6.5753512],[-11.0559449,6.575178],[-11.0559596,6.5749502],[-11.0560066,6.574737],[-11.0560924,6.5745585],[-11.0561997,6.5743693],[-11.0562399,6.5742468],[-11.0562345,6.5741668],[-11.0561836,6.5740576],[-11.0559985,6.5738471],[-11.0556015,6.5735407],[-11.0550731,6.5732369],[-11.054416,6.5729065],[-11.0540244,6.5727013],[-11.0537884,6.5725707],[-11.053614,6.5724881],[-11.0533968,6.5724029],[-11.0531205,6.5723123],[-11.0529408,6.5722563],[-11.0526699,6.5721684],[-11.0522032,6.5719073],[-11.0513557,6.5714491],[-11.0505617,6.5710892],[-11.0495264,6.5707535],[-11.049179,6.5706336],[-11.0488665,6.5705004],[-11.0484388,6.5703499],[-11.0477387,6.5701607],[-11.0473834,6.5700515],[-11.0469247,6.5698743],[-11.0461965,6.5695439],[-11.0455796,6.5692041],[-11.0445818,6.5687192],[-11.0441968,6.5685312],[-11.0435263,6.5681809],[-11.0432164,6.5680356],[-11.04277,6.5678838],[-11.0420805,6.5676199],[-11.0408118,6.567047],[-11.0401125,6.5666887],[-11.0398664,6.5665188],[-11.039688,6.5664249],[-11.0392214,6.5662358],[-11.0384166,6.565844],[-11.0376374,6.5655069],[-11.0369749,6.5651951],[-11.0358632,6.5646795],[-11.0347983,6.5642079],[-11.0340862,6.5638562],[-11.0326733,6.5632453],[-11.0319069,6.5629009],[-11.0302399,6.5621615],[-11.0290302,6.5616165],[-11.0280083,6.5611369],[-11.0253301,6.5599565],[-11.0241111,6.5594182],[-11.0219388,6.5584219],[-11.021512,6.5582631],[-11.0210238,6.5580686],[-11.0196559,6.5574757],[-11.0193783,6.5573531],[-11.0192053,6.5572931],[-11.0187346,6.5570973],[-11.0181633,6.5568055],[-11.0176054,6.556567],[-11.0173767,6.5564831],[-11.0172077,6.5563985],[-11.0168208,6.5562033],[-11.0164641,6.5560661],[-11.0154998,6.5556277],[-11.0146858,6.5552427],[-11.0140997,6.5549562],[-11.0136397,6.5547724],[-11.0126916,6.5543034],[-11.011793,6.5538597],[-11.0112365,6.5535773],[-11.0107282,6.5533441],[-11.0094944,6.5527126],[-11.0089217,6.5524221],[-11.0083477,6.5520917],[-11.007582,6.551724],[-11.0069758,6.5514388],[-11.005742,6.550778],[-11.0050553,6.5504223],[-11.0037786,6.5497614],[-11.003391,6.549551],[-11.0022175,6.5488848],[-11.0016596,6.5485651],[-11.0010508,6.5481759],[-11.0006069,6.5479295],[-11.0002122,6.5477134],[-11.0000128,6.5475924],[-10.9988876,6.5468796],[-10.99839,6.5465864],[-10.9976122,6.5461109],[-10.9961303,6.5452021],[-10.9950507,6.5446199],[-10.9939644,6.5440749],[-10.9933387,6.5438059],[-10.9930216,6.5436367],[-10.9923765,6.5433209],[-10.9918454,6.5430691],[-10.9908275,6.5425175],[-10.9898472,6.5420324],[-10.9893215,6.54179],[-10.9891424,6.5417061],[-10.9878248,6.5410732],[-10.987397,6.5408587],[-10.9869477,6.5406641],[-10.9854443,6.5399247],[-10.9845726,6.5394835],[-10.983249,6.5388334],[-10.9828064,6.5385936],[-10.9825717,6.5384803],[-10.9819065,6.5380926],[-10.9810254,6.537565],[-10.9804098,6.5372185],[-10.9798814,6.5369628],[-10.9796789,6.5368705],[-10.9794905,6.5367576],[-10.9784827,6.5361687],[-10.9777679,6.5357542],[-10.9755041,6.5343845],[-10.9751098,6.5341581],[-10.9745613,6.533901],[-10.9739819,6.5336225],[-10.9731531,6.5332214],[-10.9726931,6.5329362],[-10.971584,6.5322434],[-10.9709282,6.5318611],[-10.9703569,6.5315679],[-10.9697762,6.5313321],[-10.9694181,6.5312228],[-10.9691378,6.5311042],[-10.9684807,6.5307804],[-10.9674977,6.5302648],[-10.966756,6.5298158],[-10.9660185,6.5294296],[-10.9655182,6.5291815],[-10.9651239,6.529015],[-10.9648074,6.5288445],[-10.9641784,6.5284821],[-10.9634596,6.5281103],[-10.9631445,6.5279663],[-10.9624779,6.5275934],[-10.9618315,6.5272296],[-10.9610134,6.5268352],[-10.9605863,6.5266672],[-10.9604032,6.5265794],[-10.9600572,6.5263316],[-10.9596817,6.5260145],[-10.9593786,6.5258332],[-10.9590916,6.5257226],[-10.9510013,6.5534457],[-10.9475683,6.5586932],[-10.9437722,6.5592159],[-10.9441101,6.5598158],[-10.9443562,6.5602522],[-10.9424014,6.5619844],[-10.9399548,6.5619877],[-10.9396953,6.5620056],[-10.93855,6.5617982],[-10.937392,6.561589],[-10.9369811,6.5615431],[-10.9354726,6.5613744],[-10.9302408,6.560756],[-10.9295579,6.5608835],[-10.9287536,6.5610341],[-10.928461,6.5609753],[-10.9277865,6.5609497],[-10.9258007,6.5605126],[-10.9157866,6.5582528],[-10.9145871,6.5579585],[-10.9141185,6.5578433],[-10.9123625,6.5549195],[-10.9115004,6.5532496],[-10.9105677,6.5509918],[-10.9094836,6.5483671],[-10.908332,6.5438899],[-10.9081376,6.5431334],[-10.9071861,6.5420781],[-10.9046432,6.5388742],[-10.9042038,6.5382452],[-10.9031839,6.5363815],[-10.9029245,6.5359078],[-10.9021814,6.5345499],[-10.9015294,6.5331945],[-10.899843,6.5298075],[-10.8988789,6.5278713],[-10.8960518,6.5225967],[-10.8958456,6.5224506],[-10.8925749,6.5201325],[-10.886291,6.5176792],[-10.8848513,6.517419],[-10.8804702,6.5166267],[-10.8763349,6.5158787],[-10.8755505,6.515737],[-10.8747247,6.5151094],[-10.8748414,6.514753],[-10.8766819,6.5091269],[-10.878365,6.5013524],[-10.8784558,6.5009333],[-10.8803275,6.4974076],[-10.8804301,6.4971354],[-10.8817007,6.4937594],[-10.883385,6.4920618],[-10.882936,6.4917278],[-10.8816897,6.4907995],[-10.880206,6.4896426],[-10.8797677,6.4895273],[-10.8786191,6.4892258],[-10.8788277,6.4884848],[-10.87967,6.4876363],[-10.8801712,6.4868981],[-10.8798727,6.4853102],[-10.8793398,6.4840441],[-10.8797116,6.4829143],[-10.880463,6.4811795],[-10.8808438,6.4807187],[-10.880671,6.4804419],[-10.8804281,6.4800529],[-10.879332,6.4798139],[-10.8791124,6.4797113],[-10.8780461,6.480173],[-10.8776352,6.4803508],[-10.8773237,6.4818319],[-10.8769854,6.4825582],[-10.8765744,6.4830191],[-10.876272,6.4832096],[-10.8756342,6.4821552],[-10.8754203,6.4815214],[-10.8743515,6.4816231],[-10.8738698,6.4823601],[-10.8734431,6.4830132],[-10.8732077,6.4832209],[-10.8716201,6.4825927],[-10.8708313,6.4820447],[-10.8705951,6.4819574],[-10.8709492,6.4808355],[-10.8711906,6.4805826],[-10.8724562,6.480053],[-10.8726522,6.4790532],[-10.8717066,6.4774134],[-10.8704366,6.4768897],[-10.870101,6.4774159],[-10.869491,6.4783726],[-10.8694331,6.4793815],[-10.8678301,6.4806368],[-10.8675426,6.4808786],[-10.8665944,6.481585],[-10.8651058,6.4826941],[-10.8648573,6.4827233],[-10.8641432,6.4825638],[-10.8625306,6.4822035],[-10.8608909,6.481328],[-10.8604633,6.4811182],[-10.8590645,6.4803684],[-10.8592481,6.479207],[-10.8599518,6.4777352],[-10.8600153,6.4766533],[-10.859767,6.4766362],[-10.857966,6.4765122],[-10.8571468,6.477286],[-10.8562809,6.4781041],[-10.856579,6.4791631],[-10.8563751,6.4794989],[-10.85583,6.4808816],[-10.8554846,6.4814764],[-10.8555915,6.4823039],[-10.8556777,6.482665],[-10.8556026,6.4830648],[-10.8553479,6.4834784],[-10.8547175,6.4840291],[-10.8539773,6.4839256],[-10.8533368,6.4821315],[-10.8531199,6.4806523],[-10.851904,6.4804985],[-10.8500067,6.4817735],[-10.8483204,6.4830483],[-10.8471587,6.4832639],[-10.8456786,6.4830579],[-10.8447236,6.4820041],[-10.8446658,6.4815534],[-10.8445062,6.4803136],[-10.8444002,6.4798958],[-10.8424968,6.4798982],[-10.8427034,6.4785237],[-10.8428048,6.4773603],[-10.8420635,6.4769403],[-10.840586,6.4774741],[-10.8398443,6.4769484],[-10.8399427,6.4749397],[-10.8391662,6.4741903],[-10.838724,6.4746915],[-10.8368875,6.4774874],[-10.8342515,6.4791883],[-10.8329875,6.4805565],[-10.8328804,6.4816345],[-10.8327766,6.4826781],[-10.832661,6.4838398],[-10.832589,6.4841689],[-10.8324751,6.4846909],[-10.8302015,6.4865402],[-10.829882,6.4868573],[-10.828365,6.4878771],[-10.8271928,6.4898648],[-10.8248719,6.4915386],[-10.8245156,6.4916738],[-10.8242017,6.4917444],[-10.8229905,6.4920183],[-10.8198801,6.4916566],[-10.8190257,6.4915573],[-10.8157461,6.4905118],[-10.8145822,6.4900933],[-10.8133948,6.4907174],[-10.8127135,6.4920716],[-10.8123842,6.4922559],[-10.8117366,6.4923232],[-10.8102205,6.4914527],[-10.8097245,6.491168],[-10.8088363,6.4909858],[-10.8085126,6.4909191],[-10.8086431,6.4912289],[-10.8085666,6.4924402],[-10.8092083,6.494552],[-10.8099595,6.4977201],[-10.810394,6.5002446],[-10.8106086,6.5014916],[-10.8101745,6.5021306],[-10.8093454,6.5033508],[-10.8086448,6.5044231],[-10.8080158,6.5050133],[-10.8073927,6.5056746],[-10.8070502,6.5064682],[-10.8067318,6.5074894],[-10.8072612,6.5115766],[-10.8077294,6.5133386],[-10.8078239,6.5136943],[-10.8084396,6.5160119],[-10.8087236,6.5194343],[-10.8099292,6.5202426],[-10.810623,6.520708],[-10.8133737,6.5213779],[-10.8167591,6.5224824],[-10.8191445,6.5230818],[-10.8200308,6.5229221],[-10.8205038,6.5231792],[-10.8274637,6.5252771],[-10.8326404,6.5264897],[-10.8329495,6.5265631],[-10.8346352,6.5266457],[-10.8357058,6.5272171],[-10.8360118,6.5273804],[-10.8357114,6.5302358],[-10.835723,6.5354149],[-10.8357271,6.5373131],[-10.8357424,6.5375815],[-10.8360749,6.5433753],[-10.8367502,6.5489476],[-10.8370857,6.549686],[-10.8377645,6.5512092],[-10.8407036,6.564507],[-10.84199,6.5680428],[-10.8422198,6.5686793],[-10.8425589,6.5691607],[-10.8422446,6.5699015],[-10.8400784,6.5700683],[-10.8373313,6.5702897],[-10.8364247,6.5702428],[-10.8354283,6.5701911],[-10.8339495,6.5704078],[-10.8337678,6.5709595],[-10.8336432,6.571338],[-10.8335312,6.5716774],[-10.8330075,6.572948],[-10.8304739,6.5738027],[-10.8291027,6.574548],[-10.8291086,6.5761794],[-10.8305195,6.5840065],[-10.8303569,6.5844292],[-10.8292542,6.5872955],[-10.8290454,6.5878382],[-10.8285514,6.5891228],[-10.8282029,6.5891794],[-10.8225651,6.5900974],[-10.816643,6.5913843],[-10.8140046,6.5918742],[-10.8132343,6.5920172],[-10.8120507,6.5912998],[-10.8081137,6.5889136],[-10.8070225,6.5886203],[-10.8047789,6.5880169],[-10.8018429,6.5873183],[-10.7955843,6.5859722],[-10.791069,6.5850011],[-10.78728,6.5846988],[-10.7862275,6.5845376],[-10.785746,6.5843042],[-10.7845063,6.5837023],[-10.7839487,6.5834313],[-10.7832067,6.5827999],[-10.7830104,6.5819637],[-10.7826839,6.5805713],[-10.7823884,6.5801875],[-10.7819571,6.5769063],[-10.7819516,6.5753522],[-10.7813152,6.5711263],[-10.7816395,6.5672903],[-10.7822353,6.5623496],[-10.7822308,6.5610815],[-10.7805902,6.5590326],[-10.7789396,6.5569707],[-10.7770781,6.5536476],[-10.7763302,6.5513248],[-10.7773778,6.5486786],[-10.7806506,6.5477159],[-10.7813809,6.5476116],[-10.7844539,6.5471735],[-10.785946,6.5467088],[-10.7861693,6.5459085],[-10.7871323,6.5463152],[-10.7874077,6.5467708],[-10.7929761,6.5407512],[-10.7871796,6.5290965],[-10.7862735,6.5283606],[-10.7848311,6.5278418],[-10.7825014,6.5260626],[-10.7800684,6.5245804],[-10.7736812,6.5234643],[-10.7723887,6.5232382],[-10.7721168,6.5231889],[-10.758215,6.5246572],[-10.757043,6.5253462],[-10.755535,6.5254594],[-10.751104,6.5294815],[-10.7511253,6.5298527],[-10.740689,6.5389343],[-10.7398965,6.5396537],[-10.7352107,6.5441673],[-10.7295279,6.5496414],[-10.7274244,6.5517418],[-10.7235777,6.5552979],[-10.7151113,6.5626013],[-10.7139483,6.563601],[-10.7166731,6.5659405],[-10.7176032,6.5667488],[-10.7169763,6.5692296],[-10.7163664,6.5705027],[-10.7151595,6.5750923],[-10.7141247,6.5790264],[-10.7131453,6.5806715],[-10.7104035,6.5852771],[-10.7098914,6.5861373],[-10.708191,6.5869948],[-10.7004545,6.5905448],[-10.6971302,6.5918961],[-10.6965704,6.5921438],[-10.6925093,6.5924809],[-10.6877205,6.592878],[-10.6799336,6.592455],[-10.6793445,6.5924723],[-10.6711859,6.5922809],[-10.6689742,6.5923533],[-10.6664301,6.5924364],[-10.6654087,6.5924698],[-10.6602552,6.590878],[-10.6572435,6.5899482],[-10.6519773,6.5908427],[-10.651227,6.5908396],[-10.6485046,6.591573],[-10.6448916,6.5925413],[-10.644013,6.5927838],[-10.6427491,6.5930423],[-10.6332669,6.595559],[-10.6297361,6.5965249],[-10.6250702,6.5982458],[-10.6190426,6.6004684],[-10.6131037,6.602498],[-10.6036475,6.605729],[-10.5968767,6.608229],[-10.5949769,6.6121393],[-10.592245,6.6166372],[-10.5908556,6.6183093],[-10.591023,6.6187165],[-10.5932626,6.6203167],[-10.5981772,6.6228159],[-10.5986174,6.623053],[-10.6024588,6.6263835],[-10.606832,6.6302018],[-10.6084259,6.6327358],[-10.608586,6.6412953],[-10.6097233,6.6455863],[-10.6105462,6.646849],[-10.6111842,6.6478568],[-10.6108913,6.6509612],[-10.6108012,6.6519256],[-10.6096246,6.6558935],[-10.6081897,6.6617126],[-10.6073361,6.6634018],[-10.6046445,6.6687557],[-10.6039345,6.6739492],[-10.6032819,6.6764618],[-10.6024931,6.6777857],[-10.6024377,6.6780249],[-10.6019719,6.6800339],[-10.6010505,6.681226],[-10.5984069,6.6811023],[-10.5973564,6.68322],[-10.5971011,6.6859958],[-10.5966134,6.6869791],[-10.5963132,6.6875842],[-10.589972,6.6883977],[-10.5880741,6.6891097],[-10.5876321,6.6893768],[-10.5876857,6.6905092],[-10.587777,6.692439],[-10.5878722,6.6930292],[-10.5901283,6.6958256],[-10.5924907,6.7004558],[-10.5936445,6.7027314],[-10.5938441,6.7029297],[-10.5953827,6.7062846],[-10.5957518,6.7072233],[-10.5968805,6.7100946],[-10.5970957,6.7104793],[-10.5978181,6.7117695],[-10.5973261,6.713353],[-10.5972528,6.7135889],[-10.594883,6.7151396],[-10.594082,6.7169703],[-10.5939402,6.7172603],[-10.5937143,6.7177685],[-10.5933449,6.7181405],[-10.5919554,6.7187588],[-10.5876074,6.7206933],[-10.5796671,6.7215639],[-10.5786048,6.7223236],[-10.5781988,6.7223854],[-10.5778546,6.7225781],[-10.5766306,6.723263],[-10.5760318,6.7242811],[-10.57511,6.725142],[-10.5747873,6.7263961],[-10.5739411,6.7278337],[-10.5740409,6.7293237],[-10.5744466,6.7352494],[-10.5743155,6.7355138],[-10.5725403,6.7390919],[-10.5729862,6.7399275],[-10.5739885,6.7425325],[-10.574035,6.7445297],[-10.5740866,6.7467484],[-10.5741241,6.7471505],[-10.5733661,6.7590923],[-10.573576,6.7602005],[-10.5736857,6.7608076],[-10.5743445,6.7642559],[-10.5743579,6.764825],[-10.5741746,6.7677457],[-10.5725364,6.7712484],[-10.5724286,6.7714805],[-10.5717724,6.7722286],[-10.5664878,6.7764557],[-10.5671832,6.7768914],[-10.5666457,6.7771249],[-10.5657263,6.7789245],[-10.5658454,6.7816765],[-10.5660705,6.7823953],[-10.5663407,6.783258],[-10.5661358,6.7852673],[-10.5653289,6.7877877],[-10.5652555,6.7885293],[-10.5637273,6.7926748],[-10.5630998,6.7947912],[-10.5609951,6.7980748],[-10.5577998,6.802499],[-10.556845,6.806598],[-10.5564747,6.8080991],[-10.5563232,6.808714],[-10.5542154,6.8110464],[-10.549987,6.8117229],[-10.5436522,6.8150976],[-10.5371052,6.8183954],[-10.5317222,6.8217956],[-10.5262248,6.8225529],[-10.5232857,6.8244128],[-10.5200803,6.8262555],[-10.509898,6.8308588],[-10.4989499,6.8328071],[-10.483611,6.8409222],[-10.5042053,6.8612157],[-10.5293662,6.8676668],[-10.5299085,6.8677771],[-10.5340707,6.8679735],[-10.5346324,6.868],[-10.5354338,6.8681992],[-10.5369966,6.8683146],[-10.5374321,6.8687534],[-10.5441024,6.8754773],[-10.5774348,6.8811232],[-10.5779645,6.8800375],[-10.5831553,6.8809054],[-10.5838269,6.880746],[-10.5873534,6.8790428],[-10.5962362,6.877636],[-10.6012557,6.8772648],[-10.6016721,6.8774714],[-10.6044394,6.8774909],[-10.6061644,6.8789846],[-10.6280165,6.8758759],[-10.6394321,6.8748438],[-10.6711433,6.8718668],[-10.6752119,6.871488],[-10.6768259,6.8680514],[-10.6816424,6.8581123],[-10.6829705,6.8548372],[-10.6852121,6.8493384],[-10.7131252,6.8043792],[-10.7395483,6.8021557],[-10.7588059,6.8190539],[-10.7593992,6.8506092],[-10.7722413,6.9057589],[-10.7702099,6.9094737],[-10.760548,6.9390785],[-10.7681183,6.9415354],[-10.7710836,6.9442329],[-10.7738992,6.9460601],[-10.7864401,6.9555707],[-10.7962606,6.9602442],[-10.8048452,6.9648103],[-10.821127,6.972983],[-10.8224292,6.9736369],[-10.8227901,6.973818],[-10.8274665,6.9776358],[-10.8280267,6.9775008],[-10.8398672,6.9746915],[-10.8463339,6.973097],[-10.8469856,6.9729362],[-10.8520723,6.9739323],[-10.8572762,6.9749511],[-10.8656306,6.9696595],[-10.8673668,6.9709439],[-10.8692949,6.97172],[-10.8698094,6.9718852],[-10.8788361,6.9733112],[-10.8913124,6.9756539],[-10.8915651,6.9757026],[-10.9028041,6.9778714],[-10.9037242,6.9780835],[-10.9234403,6.9821155],[-10.9387235,6.9893941],[-10.9371931,6.9842751],[-10.9370284,6.9805358],[-10.9385186,6.9771228],[-10.940863,6.9746047],[-10.9410129,6.9730921],[-10.9410611,6.9714894],[-10.9422058,6.970078],[-10.9435564,6.9689587],[-10.9437556,6.9681775],[-10.944107,6.9667189],[-10.944028,6.9631743],[-10.9453431,6.9630585],[-10.9470936,6.9628042],[-10.9482676,6.9619779],[-10.9491418,6.9607319],[-10.9483347,6.9586491],[-10.9481676,6.9572514],[-10.9481238,6.9568923],[-10.9480692,6.9568545],[-10.9479502,6.9566555],[-10.9469623,6.9550022],[-10.9434414,6.9536589],[-10.9438485,6.9507286],[-10.9434944,6.9500551],[-10.9424507,6.9457967],[-10.9419535,6.9432016],[-10.941812,6.9399823],[-10.9431872,6.9374449],[-10.9450825,6.9367847],[-10.9453376,6.9362602],[-10.9452378,6.9353653],[-10.9445948,6.9331647],[-10.9450826,6.9318113],[-10.9465457,6.9302709],[-10.9468144,6.9302344],[-10.9478737,6.9300907],[-10.9486272,6.9298619],[-10.9491148,6.929501],[-10.9490793,6.928797],[-10.9488727,6.9281975],[-10.9503669,6.9268662],[-10.9509875,6.9263132],[-10.9521798,6.9254097],[-10.9520644,6.9233353],[-10.953731,6.9213755],[-10.9538834,6.9201038],[-10.9538418,6.9169645],[-10.9552654,6.9169696],[-10.9568604,6.9164966],[-10.9574405,6.9157946],[-10.9592074,6.9116251],[-10.9614587,6.9076816],[-10.9593436,6.9051141],[-10.9569005,6.9032437],[-10.9567337,6.9017121],[-10.9569629,6.9002085],[-10.9597975,6.9006982],[-10.9625901,6.9007493],[-10.9623846,6.8970934],[-10.962342,6.8936449],[-10.9641075,6.8885475],[-10.964912,6.8862874],[-10.9653295,6.883922],[-10.9657194,6.8824708],[-10.9647305,6.8806459],[-10.9655765,6.8786096],[-10.9650925,6.874759],[-10.9660252,6.8739131],[-10.9669227,6.8736585],[-10.9692397,6.8739268],[-10.9716261,6.8746344],[-10.9726389,6.8743416],[-10.9729303,6.8735852],[-10.9737898,6.8724425],[-10.9739658,6.8716598],[-10.97406,6.871071],[-10.9738717,6.8706317],[-10.9733916,6.8697251],[-10.9728696,6.8682578],[-10.9735746,6.8652286],[-10.9760488,6.8627467],[-10.9786897,6.8579863],[-10.9790231,6.8546007],[-10.9796896,6.8521696],[-10.9830931,6.8510177],[-10.9862406,6.8491021],[-10.9883874,6.845586],[-10.9886898,6.8393501],[-10.9885486,6.8311015],[-10.9879871,6.8263691],[-10.9855578,6.8251977],[-10.9837218,6.8238433],[-10.9814915,6.8230741],[-10.9811112,6.8222089],[-10.98102,6.8219997],[-10.9797778,6.8206445],[-10.9788801,6.8202523],[-10.9773527,6.8201106],[-10.9754664,6.8181636],[-10.9729351,6.8166555],[-10.9706755,6.8151896],[-10.9692751,6.8132109],[-10.9683985,6.8118165],[-10.9682338,6.8084868],[-10.9690193,6.8058249],[-10.9694447,6.8050426],[-10.9682082,6.7995675],[-10.9663364,6.7977088],[-10.9659924,6.7968545],[-10.9660868,6.7953545],[-10.9669671,6.7950605],[-10.9682862,6.7950386],[-10.9699769,6.7956693],[-10.9704792,6.7964957],[-10.9716376,6.7966692],[-10.9725284,6.7961369],[-10.9733992,6.7946731],[-10.9754486,6.7927157],[-10.9763887,6.7923117],[-10.9776129,6.7923705],[-10.9787164,6.7921455],[-10.9790398,6.7917319],[-10.9793143,6.7913274],[-10.9794276,6.7905756],[-10.9785888,6.7889696],[-10.9782523,6.7877703],[-10.9770057,6.7850114],[-10.9769282,6.7829979],[-10.9765079,6.781511],[-10.9773104,6.7804462],[-10.9775381,6.7787563],[-10.9771435,6.7768344],[-10.97702,6.775805],[-10.9758825,6.7725999],[-10.9759532,6.7711673],[-10.9758138,6.7659057],[-10.976753,6.7629205],[-10.9767872,6.7621283],[-10.9759243,6.7610808],[-10.9719382,6.757392],[-10.9696696,6.755763],[-10.9681839,6.7540251],[-10.9669374,6.7533545],[-10.966022,6.7530476],[-10.9656765,6.7526286],[-10.9649167,6.7506769],[-10.9656295,6.7497978],[-10.9663009,6.749505],[-10.9671083,6.7494321],[-10.9678864,6.7496362],[-10.969147,6.7485158],[-10.9702693,6.7481968],[-10.9705582,6.7480013],[-10.9718646,6.7469582],[-10.9713487,6.7446712],[-10.9700012,6.7432337],[-10.9722173,6.7396509],[-10.9714698,6.737372],[-10.9731103,6.7343865],[-10.9781252,6.7304423],[-10.979668,6.7285235],[-10.9801901,6.7274865],[-10.9803932,6.7259598],[-10.9794801,6.724804],[-10.9788282,6.7236722],[-10.9783866,6.7218689],[-10.9792524,6.7184267],[-10.9814825,6.7155525],[-10.9842316,6.7131541],[-10.9860605,6.7122833],[-10.9874688,6.7122455],[-10.9884906,6.7127194],[-10.9890223,6.713141],[-10.9891957,6.714672],[-10.987937,6.7164214],[-10.9870043,6.7187124],[-10.9872792,6.7203483],[-10.9881735,6.7209869],[-10.9892182,6.7209072],[-10.9933706,6.7176082],[-10.9991134,6.7134529],[-11.0021489,6.7126992],[-11.0082198,6.7136973],[-11.0096555,6.7149806],[-11.0109066,6.7144714],[-11.012773,6.7119048],[-11.0155624,6.7090124],[-11.0179113,6.7060302],[-11.021163,6.7041935],[-11.0255211,6.7005116],[-11.0266235,6.6988313],[-11.0267684,6.6986104],[-11.0265999,6.6924805],[-11.0262512,6.6884472],[-11.0246514,6.6854934],[-11.0232362,6.6819693],[-11.0221425,6.6762813],[-11.0228775,6.6743721],[-11.0273184,6.6699643],[-11.0274505,6.6680996],[-11.0266131,6.6644169],[-11.0282632,6.6620208],[-11.0320229,6.6600636],[-11.034115,6.6606533],[-11.0392898,6.6609836],[-11.049083,6.6577582],[-11.0512918,6.6577722],[-11.055265,6.658668],[-11.0610543,6.6580932],[-11.0645355,6.6567958],[-11.0681488,6.6545491],[-11.070923,6.6515646],[-11.0748998,6.6461356],[-11.0823789,6.6419807],[-11.0860248,6.6390013],[-11.0881134,6.6355477],[-11.0885711,6.6314304],[-11.0862287,6.6271226],[-11.0837639,6.6247702],[-11.0818123,6.621511],[-11.0784633,6.613712],[-11.0767114,6.6063958],[-11.0776985,6.6006532],[-11.0761814,6.5910728],[-11.0689297,6.5851489],[-11.0650993,6.5829305],[-11.0602239,6.5806283],[-11.0579287,6.5794168],[-11.0593432,6.5776068]]]]}]}
