# Supplementary material
Source: ML conference proceedings conference paper supplement (https://proceedings.neurips.cc/paper_files/paper/2022/hash/9d3faa41886997cfc2128b930077fa49-Abstract.html)
Supplement: Supplementary file 1 [file 9d3faa41886997cfc2128b930077fa49-Supplemental-Conference.zip › code/ebola/map/geojson/bong.geojson]

{"type":"GeometryCollection","geometries":[{"type":"MultiPolygon","coordinates":[[[[-10.509898,6.8308588],[-10.4989499,6.8328071],[-10.483611,6.8409222],[-10.5042053,6.8612157],[-10.5039251,6.862303],[-10.5036986,6.8632058],[-10.5026746,6.8654166],[-10.4910853,6.8761538],[-10.482812,6.8866403],[-10.4760645,6.8920062],[-10.4728349,6.8945742],[-10.4681199,6.8965799],[-10.4493674,6.9025611],[-10.4492196,6.9027724],[-10.4466706,6.9064166],[-10.4461302,6.9071575],[-10.4321709,6.926564],[-10.4351874,6.9313094],[-10.4359098,6.9324461],[-10.4399378,6.9388037],[-10.4400135,6.938952],[-10.4393019,6.9396857],[-10.4338557,6.9457762],[-10.4304773,6.949565],[-10.4289689,6.9512696],[-10.4233121,6.9575192],[-10.4177954,6.9636281],[-10.4170226,6.9645414],[-10.4099486,6.9656806],[-10.3961689,6.9679552],[-10.3817449,6.9665275],[-10.3747471,6.9655598],[-10.363079,6.9642332],[-10.3616194,6.9640707],[-10.3552613,6.9697376],[-10.3414284,6.9839852],[-10.3362512,6.9862789],[-10.3371397,6.9869891],[-10.3333939,6.990747],[-10.3041965,7.019685],[-10.2857046,7.0373741],[-10.283727,7.0392658],[-10.2733976,7.0491747],[-10.2438224,7.0774957],[-10.2354817,7.0873514],[-10.2355362,7.0887892],[-10.2355524,7.0892401],[-10.2350185,7.0890399],[-10.2345157,7.0893118],[-10.2361538,7.109867],[-10.2365344,7.1146423],[-10.2362471,7.1148037],[-10.2357781,7.1147462],[-10.2349678,7.1253336],[-10.2338134,7.1282155],[-10.2338151,7.128852],[-10.2334492,7.1291248],[-10.2195971,7.1394468],[-10.1909694,7.1468365],[-10.1895992,7.1472492],[-10.1637394,7.153554],[-10.156772,7.1525778],[-10.1512264,7.1495189],[-10.141833,7.1482852],[-10.1388187,7.1471898],[-10.1378714,7.1470972],[-10.1377112,7.1470818],[-10.1268877,7.1460276],[-10.12517,7.1458605],[-10.1131566,7.1477521],[-10.1125348,7.1472596],[-10.1123408,7.1469506],[-10.1122144,7.1461131],[-10.1127515,7.1451369],[-10.1130539,7.1445636],[-10.1130546,7.1439984],[-10.1131577,7.1434037],[-10.1132615,7.1425797],[-10.1136316,7.1417198],[-10.1136903,7.1409406],[-10.113758,7.1394851],[-10.1132028,7.1391851],[-10.1123904,7.138473],[-10.1119075,7.1383073],[-10.1110815,7.1384909],[-10.1105715,7.1384237],[-10.1103684,7.1382983],[-10.1101788,7.1378191],[-10.1096056,7.137013],[-10.1094679,7.1367113],[-10.1094168,7.1361104],[-10.1095785,7.1359203],[-10.1099667,7.1357814],[-10.1103819,7.1355485],[-10.1108152,7.1350559],[-10.1114832,7.1332287],[-10.1118443,7.1316791],[-10.1118849,7.1307566],[-10.1118127,7.1304923],[-10.1114697,7.1297131],[-10.1113523,7.1292204],[-10.1111763,7.1276529],[-10.1109371,7.1273215],[-10.1095695,7.1267572],[-10.1082877,7.1261481],[-10.1080936,7.1258929],[-10.1080575,7.1251808],[-10.1084412,7.1242768],[-10.1086506,7.123374],[-10.1095398,7.1217662],[-10.1100092,7.1210989],[-10.1106681,7.1206331],[-10.1108975,7.120366],[-10.1117551,7.1190851],[-10.1118905,7.1184849],[-10.1117732,7.1181356],[-10.111898,7.1174993],[-10.1147512,7.1143545],[-10.1153767,7.1129104],[-10.1152107,7.1124417],[-10.1141384,7.1123911],[-10.1115725,7.1117197],[-10.1107171,7.111175],[-10.1091023,7.1099511],[-10.1090193,7.1098371],[-10.1090831,7.1096407],[-10.1097725,7.1091594],[-10.1111767,7.1085006],[-10.1115597,7.108526],[-10.1127469,7.1090707],[-10.1137618,7.1092734],[-10.1139597,7.1092417],[-10.114132,7.109058],[-10.1149299,7.1073859],[-10.1156193,7.1064358],[-10.1157661,7.1060177],[-10.1160278,7.1057834],[-10.1168831,7.1058087],[-10.1171256,7.1059671],[-10.1172533,7.1061824],[-10.1178725,7.1069678],[-10.1188107,7.1074745],[-10.119098,7.1073542],[-10.1208661,7.104998],[-10.122449,7.1024707],[-10.1229724,7.1019894],[-10.124715,7.1007796],[-10.1254745,7.1002095],[-10.1257235,7.0995508],[-10.125698,7.0981193],[-10.1253469,7.0959847],[-10.1255256,7.0952246],[-10.1253724,7.0947496],[-10.1249256,7.0943695],[-10.1241277,7.0932927],[-10.1237831,7.0929127],[-10.1233774,7.0929914],[-10.1222239,7.0939926],[-10.1205923,7.0951284],[-10.1200474,7.0955483],[-10.1190331,7.0954182],[-10.119067,7.094434],[-10.1191832,7.0940491],[-10.1209204,7.0934939],[-10.1219055,7.0928873],[-10.1220924,7.0924097],[-10.1220698,7.0916594],[-10.1218729,7.0913713],[-10.1214545,7.0913234],[-10.1209395,7.0912733],[-10.1204572,7.0915728],[-10.1199841,7.091779],[-10.1194899,7.0919168],[-10.1186607,7.0923805],[-10.1181686,7.092448],[-10.1174378,7.0929788],[-10.1170949,7.0931816],[-10.1167844,7.0931504],[-10.1165503,7.0930342],[-10.1164936,7.0923076],[-10.1163257,7.0915767],[-10.1160029,7.0909534],[-10.1160137,7.0904803],[-10.11653,7.0901897],[-10.1174002,7.0900613],[-10.118094,7.089716],[-10.1182236,7.0894131],[-10.11813,7.0890078],[-10.1172868,7.0885965],[-10.1168106,7.0867512],[-10.1167401,7.0855878],[-10.1163528,7.0841449],[-10.1162348,7.0840211],[-10.1153366,7.0836843],[-10.1145289,7.0824439],[-10.1136145,7.0807697],[-10.1134812,7.0801183],[-10.1136568,7.0798389],[-10.1144836,7.0798345],[-10.1148439,7.0796086],[-10.1149325,7.0791129],[-10.115289,7.0773567],[-10.1157144,7.0757709],[-10.1164675,7.074612],[-10.1168973,7.0735323],[-10.1163335,7.0732905],[-10.1158297,7.0728288],[-10.1153288,7.0722018],[-10.1143981,7.071761],[-10.1131375,7.0721977],[-10.112054,7.0720456],[-10.1112105,7.0710661],[-10.111102,7.0696519],[-10.1108276,7.0686583],[-10.1097317,7.0682402],[-10.1093631,7.0674198],[-10.1098151,7.066652],[-10.1124232,7.0650719],[-10.1126327,7.0646101],[-10.11216,7.0639194],[-10.1118787,7.0637968],[-10.1099965,7.0643343],[-10.109615,7.0642325],[-10.108455,7.063393],[-10.1083133,7.0631348],[-10.1084449,7.0626188],[-10.1083335,7.0617374],[-10.1078129,7.060613],[-10.1055839,7.0579286],[-10.1055754,7.0576727],[-10.106093,7.0566805],[-10.1064387,7.0563837],[-10.1110811,7.056896],[-10.1117444,7.0567984],[-10.1169042,7.0530768],[-10.1171921,7.0519413],[-10.1171674,7.0503828],[-10.11598,7.0497872],[-10.1147121,7.0491225],[-10.1142877,7.0485765],[-10.1131153,7.0460689],[-10.111989,7.0454196],[-10.1113219,7.0457189],[-10.1110321,7.0467821],[-10.1115401,7.048153],[-10.1091517,7.0503601],[-10.1082512,7.0503773],[-10.101535,7.0427677],[-10.1033494,7.0400268],[-10.0999675,7.0384125],[-10.0921556,7.0399796],[-10.0831365,7.0434643],[-10.0757119,7.0512234],[-10.0710849,7.0528722],[-10.0685719,7.0552081],[-10.0680968,7.0601964],[-10.0669229,7.0611048],[-10.0656023,7.0631366],[-10.0649105,7.064676],[-10.0639253,7.0669713],[-10.0633453,7.0688844],[-10.0627038,7.0698796],[-10.0608019,7.0716304],[-10.05742,7.0732669],[-10.0568589,7.0733671],[-10.0560225,7.0735165],[-10.0527804,7.0746815],[-10.050768,7.0756523],[-10.0506842,7.0769004],[-10.0495662,7.0778712],[-10.0471066,7.0778435],[-10.0450663,7.0782318],[-10.0420757,7.0802843],[-10.0375086,7.0822006],[-10.0355724,7.0858846],[-10.0313805,7.0857914],[-10.0291571,7.0877684],[-10.0276446,7.0917415],[-10.0269853,7.0924484],[-10.0215671,7.093642],[-10.01531,7.0927979],[-10.0079581,7.0964456],[-10.0083138,7.1033491],[-10.0073652,7.1066438],[-10.0083138,7.1098992],[-9.9938865,7.1171947],[-9.9847559,7.1204894],[-9.9767319,7.1233526],[-9.9728583,7.1261373],[-9.9693009,7.1262157],[-9.9647553,7.1288435],[-9.9596564,7.1302947],[-9.9507028,7.1339493],[-9.9485098,7.1348444],[-9.9451173,7.1354028],[-9.9434504,7.132648],[-9.9452291,7.1293926],[-9.9435942,7.127007],[-9.9432133,7.1264511],[-9.9390234,7.1273924],[-9.9359403,7.1309223],[-9.9321286,7.1304139],[-9.9286584,7.1265028],[-9.9252713,7.1259128],[-9.9232994,7.1262542],[-9.9225343,7.1283855],[-9.9182372,7.1296957],[-9.9163766,7.130788],[-9.9139288,7.1338582],[-9.9114001,7.1357354],[-9.9109646,7.1375767],[-9.9077578,7.140649],[-9.9031727,7.1400607],[-9.8998695,7.1417527],[-9.9003645,7.1473527],[-9.9052921,7.1530888],[-9.9028709,7.1568979],[-9.8967159,7.1585983],[-9.8898441,7.1556189],[-9.8853064,7.1585211],[-9.8784025,7.1585165],[-9.8743985,7.1616285],[-9.8711507,7.1642046],[-9.8639909,7.1679585],[-9.864889,7.1757297],[-9.8586404,7.1801055],[-9.8528091,7.1835047],[-9.8469619,7.1816632],[-9.8429409,7.184623],[-9.8359514,7.189195],[-9.8291,7.1970296],[-9.8235883,7.1972773],[-9.8191647,7.2032447],[-9.8159318,7.2043871],[-9.8126952,7.2013517],[-9.810489,7.19656],[-9.8022604,7.1941346],[-9.7980867,7.1967967],[-9.7952246,7.195791],[-9.7905986,7.1886547],[-9.788617,7.1810831],[-9.7842743,7.1796608],[-9.7799737,7.1817942],[-9.7764742,7.1809158],[-9.7742396,7.1787824],[-9.7696017,7.1821289],[-9.7626449,7.182882],[-9.7585552,7.1786569],[-9.7556237,7.1784814],[-9.7519357,7.1788242],[-9.7511047,7.179724],[-9.7502492,7.1817942],[-9.7505443,7.1843042],[-9.7495984,7.1849129],[-9.7467497,7.1849317],[-9.7437983,7.1827565],[-9.7409158,7.176033],[-9.739071,7.1755763],[-9.7354547,7.1766557],[-9.7342981,7.1776082],[-9.7316977,7.1811841],[-9.7269292,7.184477],[-9.7240075,7.1844427],[-9.7206511,7.1826901],[-9.7197762,7.1832672],[-9.7192176,7.1848654],[-9.7200596,7.1877069],[-9.7185575,7.1940478],[-9.718799,7.1957767],[-9.7203734,7.1967035],[-9.7204531,7.1977252],[-9.7196567,7.198795],[-9.7152758,7.1993272],[-9.7126168,7.1980611],[-9.7099626,7.1979334],[-9.7086394,7.197339],[-9.7061705,7.1945815],[-9.705322,7.1944844],[-9.7021257,7.1961554],[-9.7010867,7.1973814],[-9.6999045,7.2025784],[-9.6987044,7.2033672],[-9.6932174,7.2040127],[-9.6911901,7.2014098],[-9.6860622,7.2007591],[-9.6823654,7.1979787],[-9.6763455,7.2021035],[-9.6731494,7.2040835],[-9.6692737,7.2036103],[-9.6670675,7.2079286],[-9.6632514,7.208461],[-9.6617011,7.2072188],[-9.6569906,7.2106498],[-9.6581831,7.2167427],[-9.6622377,7.2210017],[-9.6606874,7.2265029],[-9.6556192,7.2269761],[-9.6551422,7.2312351],[-9.6523397,7.2323591],[-9.6491795,7.2425924],[-9.6473311,7.2434204],[-9.6481062,7.2446625],[-9.6501335,7.2449583],[-9.6527571,7.2438936],[-9.6547844,7.2457273],[-9.6545267,7.2514861],[-9.6502528,7.2564334],[-9.6476624,7.2592913],[-9.6475696,7.2621117],[-9.6536515,7.2660746],[-9.6531148,7.2697418],[-9.6497758,7.2770168],[-9.6466752,7.2777857],[-9.6400736,7.2758997],[-9.6371518,7.2773192],[-9.6348264,7.2821101],[-9.6325606,7.2822875],[-9.6304138,7.2794343],[-9.6265008,7.2809394],[-9.6234662,7.2855337],[-9.6176366,7.2871972],[-9.609012,7.2852961],[-9.6048595,7.2878309],[-9.5920823,7.2997125],[-9.5858573,7.2988774],[-9.5782663,7.3026662],[-9.5728176,7.3063241],[-9.5667968,7.3071942],[-9.5630383,7.3073039],[-9.5621057,7.3085645],[-9.5601491,7.3118436],[-9.546997,7.3183037],[-9.5404553,7.3227759],[-9.5355064,7.3253103],[-9.5270165,7.3263872],[-9.5238349,7.3300493],[-9.5216701,7.3312847],[-9.5166446,7.3299433],[-9.5148545,7.3298429],[-9.513432,7.3303073],[-9.511029,7.3321298],[-9.5084088,7.3325457],[-9.5000518,7.3379629],[-9.4980556,7.3394607],[-9.494064,7.3496947],[-9.4939416,7.3513147],[-9.4926238,7.3530682],[-9.4914739,7.3541799],[-9.4889586,7.3592547],[-9.4852904,7.3630158],[-9.4820301,7.364743],[-9.4809892,7.3658751],[-9.4803349,7.36579],[-9.47984,7.3664096],[-9.4790832,7.3670243],[-9.4781741,7.3676152],[-9.4776276,7.3673503],[-9.4774198,7.3671879],[-9.47685,7.3667911],[-9.4763091,7.3666372],[-9.4755233,7.3667272],[-9.475253,7.3670067],[-9.4750707,7.3675258],[-9.4750234,7.3683667],[-9.4745154,7.3698625],[-9.4744107,7.3707827],[-9.4741331,7.3715528],[-9.4740321,7.3720037],[-9.4740247,7.3726068],[-9.4739408,7.3730954],[-9.4737541,7.3734923],[-9.4736794,7.3739966],[-9.4731212,7.3747017],[-9.4725992,7.3748655],[-9.4719217,7.3751327],[-9.4714671,7.3754746],[-9.4709243,7.3760983],[-9.4704818,7.3767538],[-9.4703978,7.3772845],[-9.4704852,7.3798231],[-9.4703681,7.3802923],[-9.4699274,7.3816124],[-9.4696962,7.3818305],[-9.4690863,7.3818058],[-9.4685251,7.3819938],[-9.4684949,7.3823634],[-9.4686184,7.3832957],[-9.4686963,7.3837331],[-9.4687151,7.3841773],[-9.4681401,7.3850534],[-9.46756,7.3857009],[-9.4673923,7.3864291],[-9.4673207,7.3871095],[-9.467424,7.387908],[-9.4677079,7.3885969],[-9.4681037,7.388838],[-9.4682204,7.3893517],[-9.4681283,7.3900899],[-9.4681543,7.3903004],[-9.4683018,7.3906968],[-9.4684925,7.3910217],[-9.4685585,7.3914088],[-9.4685037,7.3922276],[-9.4684652,7.3931247],[-9.4685184,7.3939281],[-9.4684567,7.3946954],[-9.468016,7.3953729],[-9.4673999,7.3959061],[-9.4662529,7.3962097],[-9.46532,7.396301],[-9.4645584,7.3962991],[-9.4641019,7.3964493],[-9.4638797,7.3968042],[-9.4637125,7.3975364],[-9.4634436,7.3979158],[-9.4630946,7.3980669],[-9.4612482,7.3985843],[-9.4601492,7.3983529],[-9.4600365,7.3983292],[-9.4589661,7.3987662],[-9.4583033,7.399022],[-9.4576443,7.3995177],[-9.4566712,7.3999635],[-9.4560101,7.4005652],[-9.4554545,7.4007627],[-9.4548683,7.4008827],[-9.4543684,7.4008129],[-9.4541374,7.4005892],[-9.4541454,7.4002509],[-9.4541857,7.399838],[-9.4537694,7.3996169],[-9.4532107,7.3998034],[-9.4526627,7.4002988],[-9.452213,7.4008643],[-9.4514916,7.4013323],[-9.4511747,7.401969],[-9.4510753,7.4027228],[-9.4512257,7.4036844],[-9.4511639,7.4044435],[-9.4504868,7.4049932],[-9.4495478,7.4055462],[-9.4490796,7.4056875],[-9.4484135,7.4056448],[-9.447852,7.405501],[-9.4467749,7.4053731],[-9.4462699,7.4063054],[-9.4455556,7.4065658],[-9.4447592,7.4068888],[-9.4432912,7.4077437],[-9.4418756,7.408343],[-9.4407045,7.4090329],[-9.43968,7.409573],[-9.4385875,7.4104102],[-9.4380721,7.4111612],[-9.4376209,7.4117179],[-9.4368876,7.4120243],[-9.4363208,7.4123731],[-9.4361489,7.4127859],[-9.4360379,7.413413],[-9.4360602,7.4141099],[-9.4361328,7.4145732],[-9.4361387,7.4153971],[-9.436063,7.4158918],[-9.4350127,7.416555],[-9.4338201,7.4180333],[-9.4332533,7.4179774],[-9.4328424,7.4175113],[-9.4322783,7.4171943],[-9.4320124,7.4166829],[-9.4317626,7.4161342],[-9.4316631,7.4157213],[-9.4317196,7.4152898],[-9.4314564,7.4148955],[-9.4304598,7.4143149],[-9.429928,7.4142243],[-9.4294982,7.4143308],[-9.4281336,7.4149276],[-9.4264844,7.4156894],[-9.426026,7.4161765],[-9.4254181,7.416928],[-9.424948,7.4178149],[-9.4248593,7.4181718],[-9.4243275,7.4189816],[-9.4239566,7.4198283],[-9.423758,7.4228787],[-9.4233745,7.4237489],[-9.4231427,7.4243629],[-9.4226602,7.4250333],[-9.4219537,7.4251388],[-9.4214675,7.425685],[-9.4210383,7.4261446],[-9.4206659,7.4263743],[-9.4205482,7.426034],[-9.4203658,7.4257905],[-9.4199177,7.4257264],[-9.419534,7.425911],[-9.419082,7.4263517],[-9.4178968,7.4274516],[-9.417391,7.4275885],[-9.4164263,7.427136],[-9.416304,7.4273011],[-9.4161563,7.4273184],[-9.4159293,7.4271959],[-9.4154701,7.4272452],[-9.4150451,7.4271246],[-9.4148514,7.4273167],[-9.4144754,7.4278214],[-9.4140651,7.4283186],[-9.4138211,7.4280109],[-9.4133699,7.4270304],[-9.4129528,7.4262413],[-9.41297,7.4260688],[-9.4130213,7.4257143],[-9.4132465,7.4254072],[-9.4133178,7.4252008],[-9.4131916,7.4249696],[-9.4131658,7.4248804],[-9.413044,7.4244582],[-9.4130451,7.4234559],[-9.4131487,7.4225298],[-9.4132224,7.4219883],[-9.4129778,7.4214731],[-9.4122334,7.4214714],[-9.4121152,7.4212199],[-9.4120189,7.4207611],[-9.41212,7.4205348],[-9.4125766,7.4201086],[-9.4126867,7.4197118],[-9.4126142,7.419187],[-9.4126008,7.4188648],[-9.4123966,7.4182148],[-9.4119722,7.418095],[-9.411298,7.418324],[-9.4108897,7.418649],[-9.410468,7.4187982],[-9.4101081,7.4186597],[-9.4098905,7.4183693],[-9.4097831,7.4179884],[-9.4096703,7.4174531],[-9.409681,7.4170828],[-9.4100329,7.4161665],[-9.4101081,7.415799],[-9.4099066,7.4153968],[-9.4095251,7.4147495],[-9.4088215,7.4137612],[-9.408244,7.4129248],[-9.4077336,7.4122962],[-9.4074382,7.4121018],[-9.4069735,7.4119713],[-9.4063772,7.4121657],[-9.405758,7.4124529],[-9.4054489,7.4129262],[-9.4051305,7.4135554],[-9.4047448,7.4135712],[-9.404146,7.4130857],[-9.4039187,7.4128713],[-9.4035015,7.4124771],[-9.4031723,7.4120641],[-9.4029122,7.4114172],[-9.4028859,7.4108435],[-9.4029386,7.4104889],[-9.403361,7.4099147],[-9.4038624,7.4091279],[-9.4039342,7.40888],[-9.4040862,7.4084459],[-9.4041163,7.4080232],[-9.4044266,7.4076337],[-9.4049182,7.4068828],[-9.4056501,7.4061543],[-9.405754,7.4058784],[-9.4057105,7.4055203],[-9.4054751,7.4050995],[-9.4045299,7.4043745],[-9.4028721,7.4031021],[-9.4022588,7.4025209],[-9.4021209,7.402054],[-9.4022609,7.4005046],[-9.4023995,7.3996924],[-9.4026369,7.3990941],[-9.4035756,7.3979186],[-9.4041996,7.3970364],[-9.4046137,7.396417],[-9.4049601,7.3959039],[-9.4051721,7.3956059],[-9.4054693,7.3950255],[-9.4057523,7.3943727],[-9.4058015,7.393861],[-9.4067682,7.3925379],[-9.4071228,7.3919109],[-9.4074908,7.3912665],[-9.4072326,7.3906171],[-9.4070274,7.3901496],[-9.4068974,7.3898554],[-9.4066729,7.3895815],[-9.4062836,7.3895336],[-9.4054988,7.3896185],[-9.4048158,7.3898639],[-9.4043319,7.3899414],[-9.4040415,7.3897433],[-9.4038566,7.3892345],[-9.4038004,7.3887031],[-9.4035429,7.3883492],[-9.4007076,7.3888538],[-9.3998372,7.3899618],[-9.3989032,7.3911533],[-9.398798,7.3915711],[-9.3989719,7.3920465],[-9.3990341,7.3925659],[-9.3991836,7.3933042],[-9.3992975,7.3937219],[-9.3992611,7.3940376],[-9.3984252,7.3943365],[-9.3974261,7.3945475],[-9.3971326,7.3950273],[-9.39683,7.3954321],[-9.3962711,7.3955984],[-9.3957847,7.3955491],[-9.3949423,7.395579],[-9.3943414,7.3955127],[-9.3940917,7.394972],[-9.393637,7.3945262],[-9.3932742,7.3944299],[-9.3926022,7.3944839],[-9.3918801,7.3950256],[-9.3912743,7.3956352],[-9.3905976,7.3960282],[-9.3894816,7.3957162],[-9.388763,7.3951367],[-9.3878758,7.3949452],[-9.3865794,7.3947692],[-9.3861881,7.3945657],[-9.3861844,7.3939865],[-9.3850183,7.394064],[-9.3845869,7.3942141],[-9.3842036,7.3948176],[-9.3839876,7.3951278],[-9.3838935,7.3956628],[-9.383863,7.3964275],[-9.3839262,7.3969736],[-9.3836694,7.3973986],[-9.3836244,7.3981788],[-9.3834359,7.3984293],[-9.3835533,7.3992266],[-9.3834074,7.3997876],[-9.3834216,7.4004474],[-9.3833742,7.4014367],[-9.3830441,7.4023393],[-9.3830907,7.4035662],[-9.382973,7.4042697],[-9.3829228,7.4048836],[-9.3828353,7.405663],[-9.3826765,7.4061254],[-9.3824664,7.4061415],[-9.3820443,7.4058689],[-9.3817154,7.405928],[-9.3815309,7.4064973],[-9.3816847,7.4072325],[-9.3817958,7.407854],[-9.3817164,7.4081946],[-9.3811231,7.408907],[-9.38082,7.4092634],[-9.3801314,7.4092039],[-9.3788538,7.4089023],[-9.3783019,7.4090817],[-9.3778641,7.4093668],[-9.3771412,7.4097648],[-9.3762178,7.4104392],[-9.3760739,7.410867],[-9.3758417,7.4114884],[-9.3755968,7.4118692],[-9.3748995,7.4123542],[-9.3734269,7.4133957],[-9.3729371,7.4138675],[-9.372506,7.4141956],[-9.3722125,7.4142661],[-9.3718623,7.4141894],[-9.3708282,7.4136237],[-9.3700348,7.4133431],[-9.368873,7.4131742],[-9.3684193,7.413327],[-9.3680565,7.4135678],[-9.3676077,7.4140487],[-9.3671501,7.4142948],[-9.3667394,7.4144239],[-9.3660466,7.4142308],[-9.3659952,7.4137555],[-9.3659313,7.413585],[-9.3657628,7.4132974],[-9.3654538,7.4132006],[-9.3650537,7.4130177],[-9.3645291,7.4130826],[-9.3639819,7.4135118],[-9.3633412,7.4141828],[-9.3630807,7.4152159],[-9.3629694,7.4155765],[-9.3630002,7.4157323],[-9.3631275,7.4158175],[-9.3635339,7.4159069],[-9.3637949,7.4160374],[-9.3657184,7.4180348],[-9.3668205,7.4193143],[-9.3670673,7.4198484],[-9.3671774,7.4206615],[-9.3676882,7.4213498],[-9.3677499,7.4220053],[-9.3676702,7.4225993],[-9.3674248,7.4230719],[-9.3670429,7.423631],[-9.3666659,7.4240591],[-9.3661047,7.4245681],[-9.3656233,7.4248291],[-9.3650027,7.4251112],[-9.3645956,7.4254903],[-9.3635316,7.4260071],[-9.3634016,7.4264126],[-9.363417,7.4267942],[-9.3641408,7.4276733],[-9.3645193,7.4281229],[-9.3653137,7.4283569],[-9.3656919,7.4287318],[-9.3657769,7.4291314],[-9.3657214,7.4297903],[-9.3649678,7.4307317],[-9.3638291,7.431744],[-9.3622737,7.4326718],[-9.360501,7.4334598],[-9.3600968,7.4335597],[-9.3595018,7.4335403],[-9.3587804,7.4336143],[-9.3580134,7.4333359],[-9.3573477,7.432904],[-9.3569941,7.4323899],[-9.3564596,7.431315],[-9.3562058,7.4310736],[-9.3558889,7.4310585],[-9.3551737,7.4311439],[-9.3542355,7.4314239],[-9.353461,7.4317735],[-9.3529194,7.4321599],[-9.3525161,7.432762],[-9.3523177,7.433494],[-9.3517663,7.4346609],[-9.3514783,7.4355145],[-9.3512382,7.4357268],[-9.3508787,7.4357816],[-9.3505236,7.4355436],[-9.3501179,7.4350377],[-9.3497544,7.4344161],[-9.3495258,7.4341108],[-9.3493884,7.433714],[-9.3492993,7.4333763],[-9.3494786,7.4329419],[-9.3495288,7.4325763],[-9.3495307,7.4321428],[-9.3494267,7.4317971],[-9.3491062,7.4315061],[-9.3487535,7.4313605],[-9.3476347,7.4311558],[-9.3471538,7.4308943],[-9.346567,7.4303601],[-9.3460604,7.4300258],[-9.3452432,7.4295967],[-9.344667,7.4293861],[-9.343689,7.4291699],[-9.3422874,7.4290228],[-9.3392752,7.4289424],[-9.3382036,7.4289357],[-9.3375975,7.4292472],[-9.3362251,7.4299619],[-9.3356482,7.4301051],[-9.3351559,7.4299996],[-9.3344268,7.4296174],[-9.3333972,7.4292236],[-9.3326459,7.4291287],[-9.3321698,7.4290289],[-9.3315583,7.4286797],[-9.3307386,7.4278559],[-9.3299887,7.4272416],[-9.3296118,7.427099],[-9.3290824,7.4270981],[-9.3287354,7.427333],[-9.32866,7.4277155],[-9.3286581,7.4286289],[-9.3287532,7.4290882],[-9.329205,7.4295496],[-9.3300508,7.430079],[-9.3305611,7.4304295],[-9.3305403,7.4308448],[-9.330141,7.4311519],[-9.3295121,7.4313864],[-9.3280577,7.4315482],[-9.3270685,7.4317251],[-9.3264378,7.4318811],[-9.3258749,7.4321527],[-9.3246292,7.433213],[-9.3232853,7.4349101],[-9.3227422,7.4355056],[-9.3220607,7.4360442],[-9.3212623,7.4360419],[-9.32047,7.4358135],[-9.3177918,7.4348826],[-9.3171921,7.4347958],[-9.316113,7.434865],[-9.313548,7.434858],[-9.3121717,7.4349458],[-9.3117117,7.4348826],[-9.3111891,7.4345326],[-9.3109159,7.4337031],[-9.3106462,7.4326494],[-9.3101523,7.4312254],[-9.3084161,7.4288257],[-9.3080518,7.4279749],[-9.3080346,7.4273499],[-9.3080748,7.4267929],[-9.3081841,7.42645],[-9.3082453,7.4260382],[-9.3077485,7.4248377],[-9.3072185,7.4242673],[-9.3065744,7.4236555],[-9.3059591,7.4233439],[-9.3046102,7.4234997],[-9.3037323,7.4240731],[-9.3034471,7.4241557],[-9.3022413,7.4247388],[-9.3014876,7.4258302],[-9.3004486,7.4269142],[-9.2997672,7.4273942],[-9.2972939,7.4275776],[-9.2955253,7.4272577],[-9.2945057,7.4265988],[-9.294049,7.4261361],[-9.2939432,7.425349],[-9.2942948,7.4245255],[-9.2940952,7.4241174],[-9.2934757,7.4240659],[-9.2932051,7.4230327],[-9.2930891,7.4225497],[-9.2925171,7.4214767],[-9.2923221,7.4212017],[-9.2918671,7.4202867],[-9.2917901,7.4200127],[-9.2917771,7.4198427],[-9.2918431,7.4196727],[-9.2921841,7.4192557],[-9.2924731,7.4187867],[-9.2923961,7.4181467],[-9.2921641,7.4171397],[-9.2921661,7.4163827],[-9.2922321,7.4160697],[-9.2926141,7.4152737],[-9.2926411,7.4149866],[-9.2925911,7.4142546],[-9.2924231,7.4136276],[-9.2923201,7.4127916],[-9.2920111,7.4114057],[-9.2917391,7.4107257],[-9.2915431,7.4104646],[-9.2910741,7.4100716],[-9.2906831,7.4098226],[-9.2901871,7.4095726],[-9.2880981,7.4092146],[-9.2878121,7.4087539],[-9.2878521,7.4083879],[-9.2880891,7.4079059],[-9.2881291,7.4076709],[-9.2879331,7.4073699],[-9.2878301,7.4070299],[-9.288006,7.40481],[-9.288139,7.404079],[-9.288482,7.402931],[-9.288498,7.402173],[-9.288564,7.401939],[-9.289036,7.401208],[-9.289392,7.400125],[-9.290062,7.39886],[-9.290154,7.398534],[-9.290195,7.398142],[-9.290264,7.39668],[-9.290318,7.396393],[-9.290725,7.395545],[-9.290953,7.3935209],[-9.291204,7.3927639],[-9.291349,7.3923599],[-9.291558,7.3920599],[-9.292423,7.3912129],[-9.292411,7.3908999],[-9.292268,7.3906119],[-9.292204,7.3902979],[-9.292218,7.3900759],[-9.292466,7.3898289],[-9.292572,7.3895679],[-9.292561,7.3886409],[-9.29268,7.3883139],[-9.29357,7.3878069],[-9.293727,7.3876249],[-9.293702,7.3874159],[-9.293247,7.3864879],[-9.293026,7.3861869],[-9.292713,7.3860159],[-9.292243,7.3858709],[-9.291904,7.3857919],[-9.291433,7.3858039],[-9.291263,7.3859209],[-9.291053,7.3861809],[-9.290921,7.3865989],[-9.290632,7.3871339],[-9.289899,7.3878109],[-9.289532,7.3880579],[-9.289179,7.3880569],[-9.288801,7.3878989],[-9.288541,7.3875719],[-9.288437,7.3871929],[-9.288571,7.3861619],[-9.288559,7.3856909],[-9.288443,7.3852859],[-9.288379,7.3848419],[-9.288267,7.3828699],[-9.288021,7.3823599],[-9.287944,7.3819019],[-9.287749,7.3812879],[-9.287338,7.3791839],[-9.286741,7.3777459],[-9.28622,7.3770519],[-9.285829,7.3767639],[-9.285373,7.3765669],[-9.284955,7.3764479],[-9.284354,7.3764719],[-9.283988,7.3765499],[-9.283622,7.3764439],[-9.283283,7.3762349],[-9.282814,7.3758019],[-9.282345,7.3754479],[-9.28198,7.3752649],[-9.281562,7.3751589],[-9.280582,7.3751819],[-9.279615,7.3754279],[-9.279013,7.3757009],[-9.277809,7.3764029],[-9.277142,7.3767139],[-9.276671,7.3768169],[-9.275548,7.3767619],[-9.275365,7.3768789],[-9.275037,7.3772049],[-9.274671,7.3774389],[-9.274317,7.3775689],[-9.273873,7.3776589],[-9.273363,7.3776839],[-9.272907,7.3775519],[-9.27185,7.3771309],[-9.271105,7.3769719],[-9.269851,7.3769689],[-9.269472,7.3770069],[-9.269119,7.3771099],[-9.268661,7.3773699],[-9.267574,7.3783209],[-9.267273,7.3784509],[-9.266542,7.3784489],[-9.266228,7.3785129],[-9.265914,7.3787469],[-9.265795,7.3792689],[-9.265048,7.3799199],[-9.263571,7.3803079],[-9.262942,7.3806459],[-9.262485,7.3806449],[-9.261895,7.3812959],[-9.261854,7.3819229],[-9.261697,7.3821709],[-9.261435,7.3823269],[-9.261043,7.3823259],[-9.260936,7.3830959],[-9.260792,7.3832779],[-9.260609,7.3834079],[-9.260282,7.3834989],[-9.260059,7.3836809],[-9.25972,7.3836539],[-9.259446,7.3835229],[-9.259054,7.3834689],[-9.258714,7.3835079],[-9.257732,7.3841449],[-9.256542,7.3846249],[-9.255744,7.3848969],[-9.255431,7.3848309],[-9.254987,7.3845939],[-9.254245,7.3839789],[-9.254009,7.3840039],[-9.253774,7.3841209],[-9.253656,7.3842899],[-9.253133,7.3844329],[-9.252778,7.3849539],[-9.25253,7.3851229],[-9.252268,7.3852009],[-9.252007,7.3851609],[-9.251524,7.3848849],[-9.251172,7.3848449],[-9.250115,7.3844499],[-9.249632,7.3843769],[-9.24869,7.3843439],[-9.248428,7.3842779],[-9.247848,7.3842329],[-9.247661,7.3843969],[-9.24753,7.3845939],[-9.246882,7.3859609],[-9.246608,7.3864319],[-9.246322,7.3867809],[-9.246005,7.3870219],[-9.244986,7.3875569],[-9.243343,7.3881349],[-9.243091,7.3882879],[-9.242477,7.3890859],[-9.242181,7.3894029],[-9.241984,7.3895449],[-9.241786,7.3895999],[-9.24125,7.3893909],[-9.240769,7.3893359],[-9.239334,7.3900239],[-9.238863,7.3901109],[-9.237834,7.3902299],[-9.237067,7.3901749],[-9.236443,7.3901849],[-9.235425,7.3905009],[-9.235107,7.3906429],[-9.233564,7.3906409],[-9.232973,7.3903339],[-9.231934,7.3895999],[-9.231628,7.3894459],[-9.231311,7.3893469],[-9.228541,7.3893769],[-9.227501,7.3893209],[-9.226822,7.3891449],[-9.226626,7.3887949],[-9.226322,7.3873279],[-9.226202,7.3870319],[-9.226038,7.3867689],[-9.225742,7.3865499],[-9.22537,7.3864179],[-9.224517,7.3862309],[-9.222349,7.3862619],[-9.221342,7.3861949],[-9.219033,7.3856889],[-9.218442,7.3856549],[-9.217391,7.3855009],[-9.217085,7.3855549],[-9.216362,7.3859589],[-9.216176,7.3859809],[-9.215683,7.3859039],[-9.215125,7.3859249],[-9.213471,7.3861749],[-9.213022,7.3863159],[-9.212595,7.3865129],[-9.212046,7.3875189],[-9.211849,7.3877599],[-9.211619,7.3878909],[-9.20864,7.3884669],[-9.208356,7.3885539],[-9.208049,7.3887289],[-9.207435,7.3892649],[-9.206986,7.3892969],[-9.206812,7.3889569],[-9.20621,7.3883879],[-9.206046,7.3881029],[-9.205894,7.3876099],[-9.205665,7.3871719],[-9.205391,7.3869639],[-9.204144,7.3865569],[-9.203608,7.3862179],[-9.202525,7.3857679],[-9.202361,7.3856029],[-9.202241,7.3853189],[-9.202165,7.3849459],[-9.202167,7.3835669],[-9.202113,7.3832829],[-9.201894,7.3830199],[-9.20173,7.3827019],[-9.201589,7.3822859],[-9.2016,7.3818379],[-9.202205,7.3801199],[-9.202545,7.3794529],[-9.202995,7.3790599],[-9.203696,7.3787539],[-9.203904,7.3785349],[-9.204003,7.3783279],[-9.204092,7.3770139],[-9.204312,7.3765219],[-9.204488,7.3762599],[-9.204554,7.3758989],[-9.204403,7.3745739],[-9.204468,7.3744209],[-9.204786,7.3742139],[-9.204896,7.3740169],[-9.204864,7.3737319],[-9.204547,7.3731739],[-9.204395,7.3726149],[-9.204243,7.3716849],[-9.204255,7.3710719],[-9.204793,7.3693769],[-9.205133,7.3689059],[-9.205342,7.3685349],[-9.205408,7.3683919],[-9.20543,7.3680419],[-9.205562,7.3677579],[-9.205792,7.3674519],[-9.20588,7.3672109],[-9.205717,7.3669369],[-9.205563,7.3668169],[-9.205356,7.3667729],[-9.204929,7.3667609],[-9.203932,7.3669459],[-9.203451,7.3669449],[-9.203199,7.3668029],[-9.202991,7.3666169],[-9.202839,7.3663209],[-9.202828,7.3660359],[-9.202643,7.3654889],[-9.202665,7.3651389],[-9.203169,7.3645919],[-9.203268,7.3644169],[-9.203301,7.3642089],[-9.20328,7.3638919],[-9.203193,7.3635419],[-9.203171,7.3632349],[-9.203392,7.3624579],[-9.203524,7.3617689],[-9.203711,7.3613749],[-9.20416,7.3609159],[-9.204215,7.3605769],[-9.204205,7.3603579],[-9.203844,7.3600509],[-9.202531,7.3599179],[-9.202246,7.3597979],[-9.202071,7.3595789],[-9.201984,7.3593489],[-9.201985,7.3590199],[-9.202522,7.3584409],[-9.202687,7.3578059],[-9.202939,7.3574349],[-9.203191,7.3572049],[-9.203662,7.3570199],[-9.204505,7.3569549],[-9.204933,7.3567039],[-9.205053,7.3564299],[-9.205197,7.3553909],[-9.205516,7.3544609],[-9.205648,7.3539359],[-9.205769,7.3537059],[-9.205977,7.3535749],[-9.206207,7.3534989],[-9.206897,7.3535219],[-9.207116,7.3534229],[-9.207225,7.3532699],[-9.207259,7.3528539],[-9.207194,7.3521869],[-9.20701,7.3511359],[-9.206737,7.3505339],[-9.206617,7.3503689],[-9.205906,7.3499089],[-9.205108,7.3490649],[-9.204464,7.3481339],[-9.204082,7.3474659],[-9.203842,7.3469409],[-9.203591,7.3461849],[-9.203614,7.3456709],[-9.203976,7.3451019],[-9.204524,7.3445229],[-9.204655,7.3442929],[-9.20471,7.3440959],[-9.2047,7.3438009],[-9.204198,7.3429689],[-9.203706,7.3425409],[-9.203193,7.3413589],[-9.202778,7.3408769],[-9.202395,7.3406459],[-9.201969,7.340197],[-9.201871,7.339989],[-9.201839,7.339332],[-9.201566,7.338675],[-9.201523,7.338446],[-9.201491,7.337789],[-9.201569,7.337045],[-9.201679,7.3366839],[-9.202393,7.334945],[-9.202832,7.3336539],[-9.203053,7.3328],[-9.202999,7.3322529],[-9.202638,7.331541],[-9.202082,7.33014],[-9.202007,7.32956],[-9.202084,7.329133],[-9.202666,7.3276129],[-9.202711,7.3271749],[-9.202689,7.3268029],[-9.202602,7.3263759],[-9.202647,7.3260369],[-9.202779,7.3256979],[-9.202834,7.3253259],[-9.202812,7.3250519],[-9.202594,7.3244169],[-9.202507,7.3240229],[-9.202508,7.3235519],[-9.202914,7.3229619],[-9.203035,7.3226549],[-9.203079,7.3221849],[-9.203178,7.3219659],[-9.203759,7.3214629],[-9.203902,7.3211789],[-9.203848,7.3207519],[-9.203466,7.3197669],[-9.203205,7.3189459],[-9.20303,7.3186059],[-9.202713,7.3183759],[-9.202472,7.3183869],[-9.202198,7.3183319],[-9.201673,7.3185279],[-9.20129,7.3186149],[-9.200917,7.3185709],[-9.200644,7.3184389],[-9.200316,7.3181539],[-9.200108,7.3180339],[-9.199846,7.3180879],[-9.199101,7.3185799],[-9.198783,7.3187109],[-9.19852,7.3187869],[-9.198257,7.3187759],[-9.198104,7.3186439],[-9.197886,7.3184029],[-9.197919,7.3180419],[-9.198424,7.3171229],[-9.198523,7.3167839],[-9.198436,7.3166089],[-9.198217,7.3164229],[-9.19801,7.3160609],[-9.198044,7.3151089],[-9.19799,7.3145509],[-9.197511,7.3131169],[-9.197358,7.3129299],[-9.196417,7.3124259],[-9.19445,7.3104759],[-9.194209,7.3103329],[-9.194056,7.3102999],[-9.193531,7.3104419],[-9.193279,7.3103969],[-9.193137,7.3102659],[-9.193072,7.3100359],[-9.193095,7.3092919],[-9.192659,7.3081639],[-9.192265,7.3077259],[-9.191904,7.3077039],[-9.191718,7.3075609],[-9.191325,7.3070899],[-9.191106,7.3070129],[-9.190384,7.3070119],[-9.190023,7.3067379],[-9.189695,7.3066279],[-9.189235,7.3065729],[-9.188677,7.3065719],[-9.188392,7.3064739],[-9.188054,7.3062209],[-9.187551,7.3055309],[-9.186438,7.3036149],[-9.186395,7.3029469],[-9.186275,7.3027609],[-9.186034,7.3026399],[-9.185717,7.3025849],[-9.184984,7.3026059],[-9.184787,7.3024419],[-9.18435,7.3019269],[-9.184131,7.3018279],[-9.183847,7.3017729],[-9.183584,7.3018379],[-9.183343,7.3020019],[-9.183058,7.3023409],[-9.182685,7.3026689],[-9.182083,7.3028649],[-9.181754,7.3028539],[-9.181514,7.3027219],[-9.181405,7.3026019],[-9.181416,7.3024589],[-9.181482,7.3023719],[-9.181821,7.3022739],[-9.181909,7.3021429],[-9.181854,7.3020329],[-9.181756,7.3019889],[-9.180891,7.3021409],[-9.18054,7.3022829],[-9.180037,7.3023149],[-9.179752,7.3022269],[-9.179523,7.3019859],[-9.179568,7.3013629],[-9.179733,7.3009029],[-9.179733,7.3006839],[-9.179667,7.3005309],[-9.179449,7.3003879],[-9.178967,7.3002349],[-9.178782,7.3001139],[-9.178618,7.2999059],[-9.178542,7.2992709],[-9.178608,7.2990089],[-9.178599,7.2978049],[-9.178523,7.2974429],[-9.178381,7.2972789],[-9.178184,7.2971479],[-9.177878,7.2970599],[-9.177703,7.2968399],[-9.177627,7.2965999],[-9.177628,7.2958449],[-9.177694,7.2956589],[-9.178165,7.2953749],[-9.17834,7.2951669],[-9.178406,7.2949919],[-9.178385,7.2947399],[-9.178199,7.2944989],[-9.177915,7.2943569],[-9.177762,7.2942029],[-9.177729,7.2940059],[-9.177927,7.2932949],[-9.177884,7.2930979],[-9.177753,7.2930209],[-9.177578,7.2930539],[-9.17737,7.2931629],[-9.176832,7.2937859],[-9.176624,7.2937969],[-9.17646,7.2937199],[-9.176351,7.2935009],[-9.176297,7.2931939],[-9.176276,7.2922419],[-9.176069,7.2920779],[-9.175828,7.2920989],[-9.175116,7.2922849],[-9.174854,7.2922729],[-9.174307,7.2921189],[-9.173781,7.2921079],[-9.173497,7.2920309],[-9.173049,7.2914499],[-9.172833,7.2898519],[-9.172658,7.2897209],[-9.172461,7.2896979],[-9.171618,7.2897629],[-9.171377,7.2895769],[-9.171071,7.2892369],[-9.170886,7.2888319],[-9.170844,7.2880109],[-9.170745,7.2877809],[-9.169849,7.2871559],[-9.169707,7.2869589],[-9.169543,7.2866629],[-9.16914,7.2856889],[-9.1688181,7.2851913],[-9.168594,7.2848449],[-9.168202,7.2837829],[-9.168159,7.2829949],[-9.16828,7.2827879],[-9.16862,7.2824049],[-9.168282,7.2816379],[-9.16837,7.2812449],[-9.168523,7.2808839],[-9.168776,7.2804569],[-9.168809,7.2800409],[-9.168788,7.2797569],[-9.168624,7.2794279],[-9.168274,7.2792089],[-9.1681,7.2786509],[-9.167925,7.2785079],[-9.167706,7.2784639],[-9.167039,7.2785619],[-9.166568,7.2786809],[-9.166075,7.2787349],[-9.165791,7.2786909],[-9.165627,7.2784939],[-9.165573,7.2782529],[-9.165573,7.2778369],[-9.165431,7.2776619],[-9.165092,7.2774539],[-9.164731,7.2773439],[-9.163823,7.2773209],[-9.163572,7.2771559],[-9.163419,7.2766639],[-9.163507,7.2764119],[-9.163442,7.2761599],[-9.163322,7.2759409],[-9.163059,7.2758199],[-9.161757,7.2757529],[-9.161046,7.2755659],[-9.160849,7.2753909],[-9.160751,7.2752259],[-9.16085,7.2747999],[-9.160818,7.2745589],[-9.160566,7.2742849],[-9.160227,7.2741309],[-9.159647,7.2742949],[-9.159275,7.2745459],[-9.15888,7.2749179],[-9.158551,7.2751359],[-9.158168,7.2751249],[-9.158037,7.2749929],[-9.15795,7.2747629],[-9.15794,7.2744349],[-9.157885,7.2742159],[-9.157721,7.2740409],[-9.15713,7.2738869],[-9.156999,7.2737769],[-9.156846,7.2735799],[-9.156683,7.2732399],[-9.156126,7.2726699],[-9.155721,7.2723739],[-9.155492,7.2720459],[-9.155504,7.2712689],[-9.155351,7.2710389],[-9.155132,7.2709289],[-9.154902,7.2710159],[-9.154015,7.2716499],[-9.153489,7.2719559],[-9.153095,7.2720429],[-9.152811,7.2720089],[-9.15257,7.2718779],[-9.152122,7.2714609],[-9.151816,7.2713519],[-9.151476,7.2713509],[-9.151115,7.2715149],[-9.150589,7.2718419],[-9.150337,7.2719079],[-9.150097,7.2718959],[-9.149003,7.2711729],[-9.148587,7.2711499],[-9.148303,7.2712919],[-9.145762,7.2722299],[-9.145434,7.2722399],[-9.145215,7.2721089],[-9.144734,7.2716479],[-9.144319,7.2715059],[-9.143114,7.2716789],[-9.142239,7.2718969],[-9.141812,7.2719399],[-9.139284,7.2718379],[-9.138835,7.2718919],[-9.138419,7.2720119],[-9.137816,7.2723179],[-9.136513,7.2731589],[-9.135921,7.2734199],[-9.135604,7.2734859],[-9.135111,7.2734739],[-9.134313,7.2733419],[-9.133459,7.2733079],[-9.133098,7.2734269],[-9.132539,7.2737109],[-9.131235,7.2744539],[-9.129802,7.2745279],[-9.129123,7.2744839],[-9.128204,7.2741649],[-9.127876,7.2741749],[-9.126868,7.2747429],[-9.126189,7.2750269],[-9.125729,7.2750259],[-9.125182,7.2749489],[-9.124832,7.2748279],[-9.124559,7.2746089],[-9.1241096,7.2739401],[-9.1236199,7.2735768],[-9.1233112,7.2730492],[-9.1228572,7.2715781],[-9.1229942,7.2707541],[-9.1227675,7.2703737],[-9.1231679,7.2690119],[-9.1232132,7.2685349],[-9.1232371,7.2677881],[-9.1232192,7.2672438],[-9.1230737,7.2668444],[-9.122773,7.2653716],[-9.1227864,7.2647725],[-9.1229958,7.2644064],[-9.1235026,7.2641169],[-9.1240864,7.2635985],[-9.1244512,7.2629564],[-9.1246427,7.2624881],[-9.1252467,7.2609216],[-9.1257751,7.2597531],[-9.1256755,7.2590024],[-9.1259732,7.2585639],[-9.1262585,7.2583102],[-9.1265304,7.2582018],[-9.1266161,7.257693],[-9.126115,7.2572049],[-9.126259,7.2569366],[-9.1264258,7.2565324],[-9.1265241,7.2559438],[-9.1261041,7.2554499],[-9.1257941,7.2549252],[-9.1252846,7.2546244],[-9.123947,7.2547707],[-9.1235217,7.2548833],[-9.1228918,7.2549476],[-9.1227768,7.2548356],[-9.1226337,7.2545191],[-9.1218139,7.2538947],[-9.1218221,7.2534348],[-9.1222883,7.2533648],[-9.1224795,7.2531958],[-9.122387,7.2524039],[-9.1220164,7.2520901],[-9.1218086,7.2518592],[-9.1216577,7.251407],[-9.1215323,7.2510804],[-9.1212328,7.2509237],[-9.1205406,7.2512076],[-9.120405,7.2510744],[-9.120152,7.2503857],[-9.1201146,7.2500437],[-9.1198544,7.2498974],[-9.1196028,7.2498622],[-9.1190351,7.2500227],[-9.1184971,7.2502672],[-9.1182797,7.2508257],[-9.1178299,7.2508802],[-9.1175007,7.2506189],[-9.1173288,7.249898],[-9.1169828,7.2496859],[-9.1160237,7.2495588],[-9.1157138,7.2498307],[-9.1151823,7.2496531],[-9.1151142,7.2493073],[-9.1153929,7.249008],[-9.1152066,7.2488694],[-9.1141375,7.2496409],[-9.1137064,7.2498761],[-9.1130147,7.2498445],[-9.1125849,7.2501996],[-9.1118495,7.2500296],[-9.1117782,7.2493696],[-9.1113286,7.2491858],[-9.1110065,7.2485047],[-9.1113433,7.2480335],[-9.1120737,7.2475201],[-9.1122469,7.2470667],[-9.1128058,7.2448372],[-9.112996,7.2437753],[-9.1136052,7.2428362],[-9.1137902,7.2425119],[-9.1137297,7.2418263],[-9.113628,7.2415784],[-9.1131832,7.2411627],[-9.112041,7.2404681],[-9.1110776,7.2399308],[-9.1109199,7.2397595],[-9.1108254,7.2395283],[-9.1108409,7.239246],[-9.1110452,7.2390049],[-9.1119166,7.2382805],[-9.1122096,7.2378733],[-9.112325,7.2376034],[-9.1123477,7.2375457],[-9.112493,7.2373472],[-9.1127686,7.2368826],[-9.1127709,7.236483],[-9.1124653,7.2355314],[-9.1120633,7.2353651],[-9.1119789,7.2350658],[-9.1118529,7.2346651],[-9.1110481,7.234425],[-9.110579,7.2344311],[-9.1102534,7.2343058],[-9.1099365,7.2344213],[-9.1098618,7.234652],[-9.1099716,7.234883],[-9.1107203,7.2349372],[-9.1111332,7.2351344],[-9.1113512,7.235466],[-9.1114583,7.2357447],[-9.1115614,7.2361931],[-9.1115442,7.23658],[-9.1112144,7.2369661],[-9.1104801,7.2372496],[-9.1099657,7.2373828],[-9.1097813,7.2376919],[-9.1092664,7.2381165],[-9.1088639,7.238052],[-9.1082048,7.237822],[-9.1077881,7.2380124],[-9.1076453,7.2383709],[-9.1073458,7.2384674],[-9.107067,7.238369],[-9.1069595,7.23824],[-9.1069031,7.2376185],[-9.1066955,7.2374776],[-9.1065115,7.2374683],[-9.1065116,7.2383355],[-9.1062679,7.2386305],[-9.1060259,7.2387158],[-9.1056641,7.2387437],[-9.1053805,7.2387257],[-9.1049463,7.2386967],[-9.1046595,7.2383547],[-9.1043525,7.2380773],[-9.1042421,7.2374193],[-9.1041806,7.236354],[-9.1042132,7.2358839],[-9.1044005,7.2352519],[-9.1045475,7.2350327],[-9.1048316,7.2348067],[-9.1055512,7.2346942],[-9.1056428,7.2343358],[-9.1055907,7.233457],[-9.1058486,7.2329363],[-9.1057919,7.2326447],[-9.1056996,7.2324616],[-9.1054179,7.2322921],[-9.104728,7.2317562],[-9.1047,7.2310229],[-9.104643,7.2306289],[-9.1047586,7.2300929],[-9.104705,7.2296341],[-9.1048793,7.2288664],[-9.10511,7.2278009],[-9.10513,7.2273389],[-9.1042014,7.2257589],[-9.1040932,7.2254735],[-9.10396,7.2248829],[-9.1037128,7.2245903],[-9.1028331,7.2237353],[-9.1022454,7.2229061],[-9.102183,7.2224739],[-9.101632,7.2211159],[-9.1014671,7.2206421],[-9.1014608,7.2203957],[-9.1014449,7.2200642],[-9.1014967,7.2196865],[-9.1017475,7.2194194],[-9.1024189,7.2189385],[-9.103403,7.2184919],[-9.104068,7.2181279],[-9.1044892,7.217848],[-9.1046232,7.2173988],[-9.1043958,7.2166688],[-9.1042054,7.2162447],[-9.10413,7.2157319],[-9.1040846,7.2149711],[-9.1041133,7.2143651],[-9.1045169,7.2139366],[-9.104865,7.2137229],[-9.1062092,7.2132996],[-9.107124,7.2129568],[-9.1077534,7.2127359],[-9.1081586,7.212293],[-9.1082501,7.2113321],[-9.1091182,7.2101058],[-9.1100745,7.2083206],[-9.1102874,7.2068919],[-9.1103956,7.2061299],[-9.1108342,7.2048974],[-9.1111734,7.2040966],[-9.1113686,7.2034735],[-9.1114245,7.2029398],[-9.1111065,7.2022586],[-9.1104869,7.201484],[-9.109752,7.1997409],[-9.1093372,7.1987826],[-9.1087605,7.1980041],[-9.1082429,7.1975502],[-9.1078671,7.1970094],[-9.107676,7.1965003],[-9.1077498,7.1960711],[-9.108489,7.1952349],[-9.10876,7.1945719],[-9.1089521,7.1938074],[-9.1089636,7.1935702],[-9.108849,7.1931189],[-9.108725,7.1921859],[-9.108399,7.1915599],[-9.1081888,7.1906045],[-9.1086377,7.1903979],[-9.1096804,7.189918],[-9.1105527,7.1888798],[-9.1116934,7.1853898],[-9.1116464,7.1826358],[-9.1110595,7.1816605],[-9.1102438,7.1812063],[-9.1097069,7.1813427],[-9.10893,7.1817416],[-9.1084129,7.181658],[-9.1068165,7.1787064],[-9.1067532,7.1778507],[-9.108356,7.1748723],[-9.1102577,7.1740331],[-9.1104786,7.1737065],[-9.1109737,7.1724597],[-9.1117038,7.171588],[-9.1135759,7.1703564],[-9.1141344,7.1696511],[-9.1141973,7.168823],[-9.1131633,7.1666285],[-9.1130575,7.1660697],[-9.1170968,7.160018],[-9.1215035,7.1546708],[-9.1206535,7.1510847],[-9.1211144,7.1498509],[-9.1204709,7.148887],[-9.121071,7.1466205],[-9.1208237,7.145339],[-9.1214519,7.1433997],[-9.1235339,7.136974],[-9.1247097,7.1345515],[-9.126226,7.1280984],[-9.1284077,7.121281],[-9.1288444,7.1175538],[-9.1292248,7.1156522],[-9.1308132,7.1135501],[-9.1323301,7.1105753],[-9.1342367,7.1061946],[-9.1357143,7.1008473],[-9.1359212,7.1001771],[-9.1364292,7.0990971],[-9.1366077,7.0985851],[-9.1365911,7.0978703],[-9.1363321,7.0976425],[-9.1353886,7.0974862],[-9.1342711,7.0976778],[-9.1330125,7.0986181],[-9.1326546,7.0987339],[-9.1321229,7.0986652],[-9.1314519,7.0982574],[-9.1311658,7.097929],[-9.1314163,7.0972241],[-9.131523,7.0963924],[-9.1316479,7.0955251],[-9.1327574,7.0938014],[-9.1336666,7.0920371],[-9.1347384,7.0909886],[-9.1353886,7.0899956],[-9.1361939,7.0892074],[-9.1364401,7.0882313],[-9.137009,7.0872786],[-9.137644,7.0867392],[-9.1382727,7.0864141],[-9.1388733,7.0855597],[-9.1395133,7.084743],[-9.1403921,7.08375],[-9.1407172,7.0828729],[-9.1414588,7.0822629],[-9.1417992,7.0817891],[-9.1423173,7.0811186],[-9.1426,7.0805806],[-9.1526718,7.0755943],[-9.154152,7.0753149],[-9.1568109,7.0737989],[-9.1568646,7.0732734],[-9.1565273,7.0723249],[-9.1566758,7.0716699],[-9.163537,7.0641447],[-9.1646913,7.0626059],[-9.1658891,7.061426],[-9.1662916,7.0610587],[-9.1666369,7.0599307],[-9.1672159,7.0584423],[-9.1668947,7.058097],[-9.1660825,7.0579499],[-9.1654176,7.0579318],[-9.1641407,7.0566035],[-9.1643161,7.0531903],[-9.1635869,7.0519173],[-9.1628603,7.0515175],[-9.1619377,7.0511275],[-9.1615104,7.0504511],[-9.1614138,7.0494819],[-9.1607123,7.0486686],[-9.1590384,7.0486792],[-9.157721,7.0478211],[-9.1571157,7.0476292],[-9.1567359,7.0471629],[-9.1564175,7.0462687],[-9.1574361,7.0435453],[-9.1578832,7.0423591],[-9.1574197,7.0404787],[-9.1576467,7.0393646],[-9.1583193,7.0389398],[-9.1594343,7.0384258],[-9.1600673,7.0378761],[-9.1609769,7.0373513],[-9.1610672,7.0366695],[-9.160801,7.0355951],[-9.1610996,7.0341672],[-9.1608154,7.032361],[-9.1608998,7.031215],[-9.1624088,7.0299051],[-9.164087,7.028503],[-9.1646028,7.0288342],[-9.1648671,7.0296857],[-9.1653868,7.0296623],[-9.1660594,7.0289698],[-9.16828,7.0286489],[-9.1682751,7.0277004],[-9.1688578,7.0272976],[-9.1698722,7.0272562],[-9.1705293,7.0275942],[-9.1708955,7.0281816],[-9.1714004,7.0283984],[-9.1725679,7.0286518],[-9.1734799,7.0282973],[-9.1739542,7.0277466],[-9.1737474,7.0271233],[-9.1731356,7.026629],[-9.1720936,7.0260086],[-9.1709626,7.0236912],[-9.1707976,7.0230049],[-9.1709452,7.0222103],[-9.1710676,7.0208549],[-9.1713982,7.0199411],[-9.1724511,7.0196187],[-9.1722267,7.0185692],[-9.1720026,7.0184607],[-9.1717991,7.0180088],[-9.1715448,7.0178094],[-9.1715728,7.0174636],[-9.17185,7.0171153],[-9.1719535,7.0157576],[-9.1717236,7.0143086],[-9.1708021,7.0132486],[-9.1699266,7.0129397],[-9.1688686,7.0133705],[-9.1682162,7.0129183],[-9.1677521,7.0112712],[-9.1664752,7.0099314],[-9.1648699,7.0088089],[-9.1641241,7.0083096],[-9.1638729,7.007491],[-9.1635956,7.0047704],[-9.1639926,7.0040647],[-9.1646749,7.003183],[-9.1655476,7.0019001],[-9.1662452,7.0008856],[-9.1670622,7.0004005],[-9.1677138,7.0005555],[-9.1682208,7.0007909],[-9.1685877,7.0016549],[-9.1694608,7.0017748],[-9.1705834,7.0017285],[-9.1715098,7.0014219],[-9.1718068,7.0011998],[-9.1718611,7.0007238],[-9.171761,7.0000084],[-9.1717864,6.9990744],[-9.1716745,6.998312],[-9.171543,6.9972108],[-9.1709991,6.9965334],[-9.1709573,6.9956458],[-9.1710594,6.9947599],[-9.1719848,6.9945559],[-9.1727325,6.9936976],[-9.1734434,6.9932019],[-9.174465,6.9929847],[-9.1751181,6.9930312],[-9.1753847,6.9938264],[-9.1755962,6.994056],[-9.1760642,6.9941671],[-9.1768277,6.9945604],[-9.1777631,6.9944599],[-9.1780724,6.9946934],[-9.1787277,6.9944802],[-9.1794632,6.9936003],[-9.1800266,6.9930463],[-9.1800428,6.9923327],[-9.1811779,6.9911379],[-9.1817654,6.9908297],[-9.1826258,6.9908804],[-9.1834763,6.9911379],[-9.1847968,6.991953],[-9.1860604,6.9921815],[-9.1872791,6.9923195],[-9.1880817,6.9919059],[-9.1883285,6.9912827],[-9.1882538,6.9909086],[-9.1878954,6.9907845],[-9.1875989,6.989798],[-9.1872884,6.9885256],[-9.1873885,6.9876554],[-9.1878179,6.9870938],[-9.1883227,6.9869525],[-9.1888367,6.9873177],[-9.1894595,6.9869735],[-9.1893555,6.9865063],[-9.1900432,6.9851267],[-9.1904446,6.9845473],[-9.1918837,6.9836286],[-9.1925852,6.9828983],[-9.1926335,6.9823745],[-9.1919799,6.9810353],[-9.1921957,6.9798758],[-9.1923054,6.9785766],[-9.1930023,6.9777385],[-9.1933329,6.9769862],[-9.1926795,6.9757827],[-9.1925212,6.9751758],[-9.1920358,6.9749086],[-9.1918271,6.9747938],[-9.1888758,6.9750233],[-9.1882556,6.9747698],[-9.1880002,6.9741904],[-9.1879786,6.9721733],[-9.1876477,6.9706025],[-9.1868564,6.9696385],[-9.1859572,6.9686032],[-9.1835582,6.9670466],[-9.1822634,6.966329],[-9.1816915,6.9654043],[-9.1815117,6.9642405],[-9.1814901,6.9629695],[-9.1811049,6.9606104],[-9.1808211,6.9600348],[-9.1806306,6.9592342],[-9.1799327,6.9583889],[-9.1790264,6.9582711],[-9.1782063,6.9578677],[-9.1777927,6.9574607],[-9.1769439,6.9571822],[-9.1745592,6.9579498],[-9.17334,6.9588995],[-9.1717106,6.9593207],[-9.1705813,6.9595492],[-9.1701317,6.9601919],[-9.1695454,6.9604025],[-9.1688477,6.960506],[-9.1681534,6.9604293],[-9.1673514,6.9596992],[-9.1665314,6.9591958],[-9.165384,6.9592065],[-9.1644021,6.9592065],[-9.1641905,6.9590556],[-9.163877,6.9584068],[-9.1640137,6.9578284],[-9.1636756,6.9569323],[-9.1631917,6.9545625],[-9.1619513,6.953114],[-9.1614405,6.9521362],[-9.1605284,6.9498908],[-9.1598931,6.9490894],[-9.1583824,6.9483253],[-9.1574977,6.9476827],[-9.1555841,6.9472257],[-9.1539585,6.9468258],[-9.1534478,6.9464831],[-9.1539154,6.9448121],[-9.1551094,6.9444408],[-9.1552318,6.9440124],[-9.1550922,6.9433814],[-9.154872,6.9425771],[-9.1552389,6.9403064],[-9.1558791,6.9372359],[-9.1569077,6.933137],[-9.1571236,6.9323373],[-9.1571068,6.9319335],[-9.156807,6.931409],[-9.1561525,6.9313804],[-9.1551886,6.9310091],[-9.1535988,6.9310591],[-9.1521457,6.9304735],[-9.1503402,6.929181],[-9.1479088,6.926646],[-9.1470241,6.9257248],[-9.1464738,6.925032],[-9.145388,6.9232358],[-9.1442762,6.9218544],[-9.1435281,6.9212474],[-9.1428407,6.920701],[-9.1422476,6.9200692],[-9.1418951,6.9197264],[-9.1412837,6.9191908],[-9.1411039,6.9186624],[-9.1410391,6.9180982],[-9.1409096,6.9167986],[-9.1408953,6.9153204],[-9.1410247,6.9145063],[-9.1414922,6.9140135],[-9.1416002,6.9133708],[-9.1419383,6.9130352],[-9.1420966,6.9125139],[-9.1419167,6.911457],[-9.1417801,6.9110214],[-9.1416721,6.9104001],[-9.1410967,6.9099859],[-9.1402478,6.9096503],[-9.1395213,6.9093718],[-9.1385142,6.9088219],[-9.1369748,6.9070937],[-9.1358151,6.9052811],[-9.135022,6.9037324],[-9.1342989,6.9027947],[-9.1334213,6.9021234],[-9.1328674,6.9021663],[-9.1323639,6.902759],[-9.1323639,6.9037731],[-9.1317668,6.9052585],[-9.1318244,6.9061083],[-9.1316732,6.9065796],[-9.131504,6.9068473],[-9.1312129,6.9070509],[-9.1306086,6.9072651],[-9.1298606,6.9072651],[-9.128242,6.9075222],[-9.1267746,6.9079507],[-9.125717,6.9074865],[-9.1250769,6.9068652],[-9.1243072,6.9062439],[-9.1229117,6.9053727],[-9.1220614,6.9048836],[-9.1216457,6.9042301],[-9.1218687,6.9032589],[-9.1222715,6.9029304],[-9.1225017,6.9018378],[-9.1223434,6.9011308],[-9.1218255,6.9007023],[-9.120801,6.8987248],[-9.120543,6.8980333],[-9.1206204,6.8973418],[-9.1212395,6.8963174],[-9.1213943,6.8954722],[-9.1213943,6.8932953],[-9.1213943,6.8908878],[-9.1210589,6.8902476],[-9.1203624,6.8899146],[-9.1190725,6.8895817],[-9.1167766,6.8885572],[-9.1154093,6.8875073],[-9.1134229,6.8849717],[-9.1126748,6.8845107],[-9.1116687,6.8843827],[-9.107799,6.8848437],[-9.1070251,6.8846132],[-9.1066124,6.883896],[-9.1066382,6.8829484],[-9.1072573,6.8817703],[-9.1084698,6.8807714],[-9.110353,6.8796957],[-9.1124168,6.8788249],[-9.1139646,6.8772626],[-9.1145064,6.8764687],[-9.1148933,6.8733184],[-9.114687,6.8720634],[-9.1135003,6.8682216],[-9.1131907,6.8671971],[-9.1120814,6.865814],[-9.1112817,6.865353],[-9.1099402,6.8651993],[-9.1087278,6.8644565],[-9.1083924,6.8638931],[-9.1083924,6.8632784],[-9.1086504,6.8628173],[-9.1088567,6.8613574],[-9.1086504,6.8583606],[-9.1081782,6.8578753],[-9.1071697,6.857577],[-9.1055174,6.8566962],[-9.1043158,6.8560218],[-9.103715,6.8555031],[-9.1034135,6.8548004],[-9.1033958,6.8535345],[-9.1036338,6.852359],[-9.1042131,6.8517625],[-9.1054362,6.8509742],[-9.1067451,6.8500368],[-9.1078395,6.8493338],[-9.1088051,6.8492059],[-9.1110152,6.8502499],[-9.1125387,6.8508677],[-9.1144699,6.8512725],[-9.116165,6.8511447],[-9.1170233,6.8508038],[-9.1175812,6.8501433],[-9.1176671,6.8493977],[-9.117431,6.8490142],[-9.1170448,6.8487799],[-9.1165942,6.848929],[-9.1157788,6.8494829],[-9.1147703,6.8496746],[-9.1138262,6.8491207],[-9.1135257,6.8485242],[-9.1135053,6.8480218],[-9.1135257,6.8475016],[-9.1138476,6.845811],[-9.1143626,6.8445753],[-9.1157144,6.8437872],[-9.1170019,6.8427858],[-9.1176027,6.8418909],[-9.1173023,6.8403996],[-9.1165675,6.8392447],[-9.116208,6.8361386],[-9.1160148,6.8347539],[-9.1162509,6.8331559],[-9.1165354,6.8305806],[-9.115829,6.8277211],[-9.1150139,6.825563],[-9.1144698,6.8254434],[-9.1136973,6.8254647],[-9.1134184,6.8259334],[-9.1137188,6.8277444],[-9.1135686,6.8285114],[-9.1131823,6.829811],[-9.1120237,6.8307485],[-9.1110795,6.8308124],[-9.1088694,6.828277],[-9.1070956,6.8258644],[-9.1069888,6.8253871],[-9.1071669,6.8247506],[-9.1077964,6.824442],[-9.1096634,6.8214592],[-9.1113155,6.8192221],[-9.1123884,6.8168998],[-9.1127237,6.8150281],[-9.1122887,6.8138311],[-9.1091319,6.8082363],[-9.1086236,6.804743],[-9.1086236,6.8013377],[-9.1115422,6.7974977],[-9.1167958,6.7930056],[-9.1266462,6.7865572],[-9.1284703,6.7847458],[-9.129127,6.7815578],[-9.1302215,6.7801086],[-9.1337969,6.7784421],[-9.1353292,6.7785871],[-9.1381019,6.7797464],[-9.1394882,6.7802535],[-9.1403638,6.7798188],[-9.1409476,6.7782248],[-9.1405098,6.7737325],[-9.1395612,6.7723558],[-9.1379559,6.7722833],[-9.1366426,6.7704719],[-9.1348914,6.7690952],[-9.1344536,6.767791],[-9.1348914,6.7646028],[-9.1344457,6.7627095],[-9.1338543,6.762071],[-9.1307107,6.7616812],[-9.1293459,6.7608302],[-9.1281431,6.7591933],[-9.1258458,6.7579268],[-9.1250193,6.7571319],[-9.124692,6.756237],[-9.124968,6.7536615],[-9.1242383,6.7522848],[-9.1242896,6.7501852],[-9.1246449,6.7496498],[-9.1275774,6.7472909],[-9.1285277,6.7470856],[-9.129385,6.7473832],[-9.1310776,6.748518],[-9.133857,6.7492073],[-9.1361517,6.748239],[-9.1406557,6.7443141],[-9.1413124,6.7432272],[-9.1414583,6.7407635],[-9.1424798,6.7391693],[-9.144377,6.7372129],[-9.1447802,6.7348126],[-9.1446103,6.7336177],[-9.1439392,6.7317782],[-9.1425528,6.7277927],[-9.1423303,6.7254108],[-9.1427681,6.7235267],[-9.1437896,6.722476],[-9.1449571,6.7222586],[-9.1469637,6.7226572],[-9.1498269,6.7236018],[-9.151007,6.7242198],[-9.1519404,6.7248378],[-9.1513416,6.725918],[-9.1516937,6.7268516],[-9.1526807,6.7269688],[-9.1531957,6.7257115],[-9.1534961,6.7251361],[-9.1542686,6.7253279],[-9.155438,6.7251041],[-9.1564036,6.7238362],[-9.1576375,6.7231649],[-9.1595579,6.7221953],[-9.1602231,6.7212896],[-9.1597692,6.7201209],[-9.1595139,6.7190702],[-9.1598057,6.7179469],[-9.1606083,6.7167513],[-9.1605719,6.7157005],[-9.1601705,6.7146135],[-9.1587112,6.7129831],[-9.1577262,6.7125483],[-9.1537495,6.7120048],[-9.1521443,6.7113163],[-9.1502107,6.709867],[-9.1492986,6.7085626],[-9.1488243,6.7060263],[-9.1490432,6.7054828],[-9.1497364,6.7052291],[-9.1502836,6.705519],[-9.1509038,6.7066785],[-9.1517794,6.7072944],[-9.1525456,6.7074394],[-9.1541144,6.7067147],[-9.1560049,6.7054351],[-9.1565287,6.7035089],[-9.1563398,6.7018232],[-9.1559385,6.7004825],[-9.152655,6.6955547],[-9.1518889,6.6947575],[-9.1501377,6.6930183],[-9.1492256,6.6919313],[-9.1492035,6.6911278],[-9.1492966,6.6907194],[-9.1493823,6.6903445],[-9.1501548,6.6894077],[-9.1514313,6.6884306],[-9.1528872,6.6871579],[-9.1544647,6.6865703],[-9.1564243,6.6861093],[-9.1586426,6.6852647],[-9.158441,6.684661],[-9.1590343,6.6838154],[-9.1591117,6.682893],[-9.1590601,6.6817657],[-9.1593697,6.6807664],[-9.1614851,6.6776148],[-9.1625686,6.6763593],[-9.1631361,6.6760006],[-9.1639358,6.6757444],[-9.1648387,6.6759494],[-9.1652773,6.6767181],[-9.1652773,6.6775636],[-9.1648129,6.6785372],[-9.1647356,6.6793572],[-9.1661286,6.6818938],[-9.1667736,6.6824831],[-9.1676249,6.6826368],[-9.1718298,6.6804077],[-9.172578,6.6797415],[-9.1730423,6.6754882],[-9.1729907,6.6743608],[-9.1725522,6.6731053],[-9.1703852,6.6707992],[-9.1660254,6.6675451],[-9.1628007,6.6657771],[-9.1591633,6.6643166],[-9.1587248,6.6638042],[-9.15857,6.662933],[-9.15857,6.6597813],[-9.158699,6.6591663],[-9.1593439,6.6588076],[-9.1613045,6.6580645],[-9.1636521,6.6575777],[-9.1662576,6.6556303],[-9.1669283,6.6546566],[-9.167388,6.6534398],[-9.1674202,6.6533232],[-9.167857,6.6496856],[-9.168373,6.6443046],[-9.1689147,6.642844],[-9.1716235,6.6389235],[-9.1719072,6.6380266],[-9.1721136,6.6370529],[-9.1726038,6.6364123],[-9.1735067,6.6356948],[-9.1743322,6.6346442],[-9.1753125,6.6329786],[-9.179203,6.6236271],[-9.1807003,6.622874],[-9.1818616,6.6226949],[-9.1825443,6.6233181],[-9.182879,6.624082],[-9.1825616,6.6250604],[-9.1828711,6.6266492],[-9.1835935,6.6280329],[-9.1846512,6.6290579],[-9.1856315,6.6295448],[-9.1870245,6.6296729],[-9.1884692,6.6292373],[-9.1889335,6.6286479],[-9.1890367,6.6277511],[-9.1884176,6.6239842],[-9.1885982,6.6221135],[-9.1889851,6.6211141],[-9.1895785,6.6203198],[-9.1912553,6.6198329],[-9.1936803,6.6181416],[-9.1945832,6.6177828],[-9.1955377,6.6177572],[-9.1988656,6.619141],[-9.199949,6.619961],[-9.200594,6.6209604],[-9.2028126,6.6264954],[-9.2066306,6.6333373],[-9.2074819,6.6341829],[-9.20823,6.6345417],[-9.2090297,6.6344904],[-9.2096489,6.6339779],[-9.2131057,6.6306723],[-9.2133379,6.6298011],[-9.2134411,6.6288786],[-9.2131573,6.6278279],[-9.2116611,6.6246761],[-9.2112999,6.6234461],[-9.2111451,6.6218573],[-9.2113257,6.6202173],[-9.2119964,6.6194229],[-9.214602,6.6189616],[-9.2154275,6.6190641],[-9.2174913,6.6200123],[-9.2189617,6.6204223],[-9.2205354,6.6203454],[-9.2219027,6.6197304],[-9.2275523,6.6164759],[-9.2285068,6.6161428],[-9.2293839,6.6160147],[-9.2312929,6.6163734],[-9.2329698,6.6163734],[-9.234208,6.6167066],[-9.2370457,6.6179366],[-9.2416893,6.6190129],[-9.2432113,6.6190641],[-9.2440111,6.6188847],[-9.2459975,6.6177316],[-9.2465908,6.6167322],[-9.246694,6.6161172],[-9.2464876,6.6153484],[-9.2459717,6.6141696],[-9.2458427,6.6133752],[-9.2459975,6.6124271],[-9.2465134,6.6117864],[-9.2474421,6.6115558],[-9.2489384,6.6117864],[-9.2521114,6.6128371],[-9.2531691,6.6129652],[-9.2546138,6.6124271],[-9.25611,6.6112995],[-9.256755,6.6102232],[-9.2570388,6.6080707],[-9.2571935,6.6072763],[-9.2576579,6.6067381],[-9.2602892,6.604893],[-9.2609342,6.6047136],[-9.2618629,6.6051237],[-9.2676415,6.6080963],[-9.268596,6.6084038],[-9.2697053,6.6083526],[-9.2741167,6.6058156],[-9.2749938,6.604688],[-9.2761031,6.6012797],[-9.2770834,6.6002034],[-9.2810304,6.5983583],[-9.2817269,6.598102],[-9.2822944,6.598307],[-9.28312,6.5988965],[-9.2840229,6.5990758],[-9.2907302,6.5980252],[-9.2952963,6.5979226],[-9.2966378,6.5974357],[-9.2998625,6.5951037],[-9.3005074,6.5949243],[-9.3011008,6.595155],[-9.3023648,6.5961288],[-9.3049962,6.5968207],[-9.3059765,6.5967182],[-9.3067504,6.5960519],[-9.3091496,6.5928229],[-9.3098719,6.5922591],[-9.3122968,6.5916441],[-9.3135867,6.5910803],[-9.3147476,6.5907984],[-9.31725,6.5909778],[-9.3181013,6.5914391],[-9.3187204,6.5921823],[-9.3192364,6.5934892],[-9.3193653,6.594463],[-9.31903,6.5956931],[-9.3166824,6.598102],[-9.3150314,6.6003059],[-9.3120647,6.6055849],[-9.3118067,6.6069944],[-9.3118067,6.6077375],[-9.3121679,6.6083782],[-9.3130192,6.6089932],[-9.3184624,6.6110433],[-9.32081,6.6125039],[-9.3227706,6.614349],[-9.3240347,6.6161428],[-9.3244474,6.6171678],[-9.3245764,6.6188591],[-9.3249118,6.619756],[-9.3261243,6.621396],[-9.3271562,6.6222929],[-9.3278527,6.6226773],[-9.3290136,6.622831],[-9.3294779,6.6226517],[-9.3300713,6.6220879],[-9.3306904,6.6219598],[-9.3319287,6.6223442],[-9.3341623,6.6229996],[-9.3360172,6.6222612],[-9.3362069,6.6215611],[-9.3363916,6.6208579],[-9.3360337,6.6203337],[-9.3339647,6.6184996],[-9.332798,6.6174838],[-9.332393,6.6167322],[-9.3320752,6.6159241],[-9.3322962,6.6149212],[-9.3327965,6.6131466],[-9.333038,6.6075069],[-9.3335023,6.6055849],[-9.3339151,6.6046111],[-9.3345858,6.6040986],[-9.3384812,6.6024585],[-9.3397453,6.6023304],[-9.3418091,6.6030479],[-9.3427894,6.6030479],[-9.3435117,6.6026892],[-9.3450596,6.601536],[-9.3490324,6.599819],[-9.3514057,6.5980764],[-9.3522829,6.5968207],[-9.3527214,6.5948218],[-9.3532374,6.594258],[-9.354553,6.5934636],[-9.3580099,6.5921054],[-9.3628082,6.5911059],[-9.3657749,6.5898246],[-9.3694124,6.5868518],[-9.3710118,6.5852886],[-9.3716691,6.5839533],[-9.3715143,6.5826207],[-9.3708436,6.5803655],[-9.3704308,6.577854],[-9.370534,6.5757525],[-9.3714627,6.5744199],[-9.3741972,6.5720109],[-9.3766738,6.5689355],[-9.3780668,6.5660139],[-9.3793567,6.5641687],[-9.3813173,6.5622209],[-9.3863736,6.5587867],[-9.3881278,6.5571465],[-9.3904496,6.5544298],[-9.3917967,6.5536518],[-9.3926682,6.5531484],[-9.3963314,6.5525845],[-9.3977245,6.5530971],[-9.3983952,6.5543273],[-9.3987564,6.5582229],[-9.4005131,6.5613428],[-9.4023587,6.5628503],[-9.4038761,6.5631571],[-9.4046241,6.56216],[-9.405051,6.5603757],[-9.4064072,6.5588314],[-9.4077196,6.5571583],[-9.413209,6.5519598],[-9.4182145,6.546563],[-9.4207154,6.5441452],[-9.4224985,6.5433023],[-9.4242546,6.5420347],[-9.4234508,6.5402919],[-9.4244371,6.5355297],[-9.4252102,6.534555],[-9.4301631,6.5288014],[-9.4305609,6.5268842],[-9.4313958,6.5254119],[-9.4338191,6.5241238],[-9.4347359,6.5230153],[-9.4364759,6.5219009],[-9.4363673,6.5193096],[-9.4381727,6.5179719],[-9.4407097,6.5175308],[-9.4449097,6.5206893],[-9.4502538,6.5222592],[-9.4521972,6.5207554],[-9.4522346,6.5148337],[-9.450534,6.512852],[-9.4496898,6.5119567],[-9.4501745,6.5102691],[-9.4511001,6.5087558],[-9.4525557,6.5070772],[-9.4539655,6.5066406],[-9.455575,6.5069862],[-9.456522,6.5077577],[-9.4596738,6.5114014],[-9.463359,6.5121376],[-9.4662637,6.5116301],[-9.4686136,6.5090108],[-9.4688718,6.5079308],[-9.468677,6.5073417],[-9.4684921,6.5066316],[-9.4680645,6.5049457],[-9.468946,6.5020987],[-9.4686493,6.4999593],[-9.4699972,6.4980357],[-9.4714678,6.4979834],[-9.4729292,6.4985151],[-9.4755731,6.5008959],[-9.4782275,6.50194],[-9.4798845,6.5012727],[-9.4804789,6.5002651],[-9.4818818,6.4977912],[-9.48178,6.495701],[-9.4825086,6.4926667],[-9.4833496,6.4920978],[-9.4854975,6.4917687],[-9.4877222,6.4920867],[-9.489728,6.4923613],[-9.4919483,6.4947469],[-9.4942654,6.4971973],[-9.4965524,6.5011728],[-9.4971062,6.5016633],[-9.4982606,6.5023387],[-9.5006653,6.5024012],[-9.5029334,6.5016297],[-9.5058331,6.5007239],[-9.5071445,6.4990841],[-9.5061841,6.497516],[-9.5043404,6.4969208],[-9.5036843,6.493448],[-9.5018499,6.4924222],[-9.5022754,6.4909557],[-9.5028977,6.489282],[-9.5020179,6.487715],[-9.5007554,6.4846648],[-9.5010952,6.4840479],[-9.5025221,6.483387],[-9.5063845,6.4833763],[-9.5079723,6.484307],[-9.5106761,6.4840905],[-9.5117596,6.4828679],[-9.5128433,6.4833337],[-9.5144204,6.4830991],[-9.5161478,6.480061],[-9.5184436,6.4771113],[-9.5208363,6.4748054],[-9.5218877,6.4733663],[-9.5214371,6.472183],[-9.5213083,6.4697097],[-9.521716,6.4669486],[-9.5220594,6.4658506],[-9.523025,6.4653602],[-9.5246987,6.4656374],[-9.5267586,6.4664689],[-9.5293228,6.4683025],[-9.5321659,6.4693153],[-9.5339791,6.4694539],[-9.5387105,6.4680893],[-9.5418004,6.4662344],[-9.5437853,6.4657653],[-9.5450727,6.4658399],[-9.5459096,6.4665755],[-9.5493428,6.470957],[-9.5515637,6.4723215],[-9.5533339,6.4724281],[-9.5545999,6.4715007],[-9.5558552,6.4714794],[-9.5580224,6.471586],[-9.5597712,6.4726733],[-9.562352,6.4750335],[-9.5629791,6.4773852],[-9.5642344,6.4778223],[-9.5666699,6.4767136],[-9.5679359,6.4772147],[-9.5689229,6.4790163],[-9.5681719,6.4800397],[-9.5689551,6.4811163],[-9.5710687,6.4808072],[-9.5721738,6.4805087],[-9.5735363,6.4810204],[-9.5799369,6.4751785],[-9.5814692,6.4727859],[-9.5820529,6.4713359],[-9.5821988,6.4656083],[-9.5812503,6.4645208],[-9.5806665,6.4627082],[-9.5811773,6.4614032],[-9.5827826,6.4600256],[-9.5862849,6.457343],[-9.5916844,6.4554579],[-9.5983243,6.4542978],[-9.6002215,6.4540803],[-9.6024834,6.4526303],[-9.6093422,6.4474099],[-9.612042,6.4445823],[-9.6150861,6.4411985],[-9.6219482,6.4355076],[-9.6237024,6.434636],[-9.6267465,6.4346873],[-9.6285007,6.4341233],[-9.6375814,6.4285861],[-9.6402128,6.427612],[-9.6430505,6.4259713],[-9.6663549,6.4030406],[-9.6663152,6.4044684],[-9.6661774,6.405489],[-9.6660866,6.4062219],[-9.6661297,6.4074952],[-9.6664114,6.4091044],[-9.6660087,6.4097501],[-9.6643562,6.4108597],[-9.6629479,6.4136578],[-9.6629689,6.4144979],[-9.6636816,6.416609],[-9.6644545,6.4190023],[-9.6644592,6.420419],[-9.6638707,6.4228871],[-9.6643906,6.4252361],[-9.664776,6.4278548],[-9.6645085,6.4298469],[-9.6636867,6.4304272],[-9.6605181,6.4310563],[-9.6600824,6.4316787],[-9.6597683,6.4322477],[-9.6594172,6.432792],[-9.659616,6.4337913],[-9.6589267,6.4360264],[-9.6595823,6.436808],[-9.6599151,6.4380132],[-9.6602546,6.4382273],[-9.6614138,6.4385997],[-9.6615171,6.4394188],[-9.6613232,6.4414915],[-9.6618118,6.443506],[-9.6638193,6.4430871],[-9.6642481,6.4434366],[-9.6661417,6.4468033],[-9.6665721,6.4482609],[-9.6676486,6.4489741],[-9.6677049,6.4499475],[-9.6670127,6.4524008],[-9.6660731,6.4548263],[-9.6662034,6.4554253],[-9.6669024,6.4561392],[-9.6668198,6.4566429],[-9.6625882,6.4593329],[-9.6611218,6.4611488],[-9.6598615,6.4628116],[-9.659023,6.4645223],[-9.6584718,6.4671132],[-9.6573115,6.4692307],[-9.6560028,6.4711951],[-9.6553834,6.4733891],[-9.6545888,6.4753562],[-9.6523442,6.4777339],[-9.6514972,6.4800504],[-9.650302,6.4813846],[-9.6488101,6.4822326],[-9.6477085,6.4843333],[-9.6464364,6.4868562],[-9.6457261,6.4886294],[-9.6450112,6.4899406],[-9.6447945,6.4914984],[-9.6442743,6.4920334],[-9.6430219,6.4935167],[-9.6422963,6.4945439],[-9.6418298,6.4962106],[-9.6408329,6.4981394],[-9.6398096,6.4994176],[-9.6375475,6.5033017],[-9.6367604,6.5058283],[-9.6364577,6.5084907],[-9.6342713,6.510663],[-9.6284472,6.5223499],[-9.6290464,6.5250905],[-9.6291016,6.525342],[-9.6292198,6.5258829],[-9.6267639,6.5279125],[-9.6264599,6.5306506],[-9.6218619,6.5400304],[-9.6186386,6.5428292],[-9.6203326,6.5458718],[-9.6180308,6.5484871],[-9.6178773,6.5492981],[-9.6185566,6.5516884],[-9.6177892,6.5530243],[-9.6160326,6.5531307],[-9.6151932,6.5541868],[-9.6150565,6.5552365],[-9.6153909,6.5557354],[-9.6159899,6.5560429],[-9.6162976,6.5571002],[-9.6158298,6.5587709],[-9.6151187,6.5598164],[-9.6145989,6.5609101],[-9.6143817,6.5625949],[-9.6137343,6.564419],[-9.6131181,6.566256],[-9.6076933,6.5744603],[-9.6062243,6.576258],[-9.6044208,6.5821622],[-9.6035001,6.5850669],[-9.6016404,6.5910746],[-9.6008811,6.5951074],[-9.5995843,6.5995279],[-9.5976058,6.6051858],[-9.5980007,6.607754],[-9.5979332,6.6091957],[-9.5984463,6.61874],[-9.600719,6.6204921],[-9.6010589,6.621507],[-9.603706,6.6223858],[-9.6048821,6.6224827],[-9.6058642,6.624147],[-9.6068471,6.6263999],[-9.6089049,6.6262012],[-9.6112575,6.6266885],[-9.6128277,6.6283526],[-9.6123389,6.6295292],[-9.6107724,6.6306092],[-9.6122433,6.6312932],[-9.6158693,6.6311909],[-9.6170474,6.6328549],[-9.6186175,6.6344212],[-9.6221473,6.6357884],[-9.6224251,6.6357089],[-9.6242047,6.6351978],[-9.6254769,6.6337263],[-9.6290065,6.6348978],[-9.6311817,6.6352212],[-9.6329275,6.6354807],[-9.6334193,6.63695],[-9.6312656,6.6389128],[-9.6318546,6.6396962],[-9.6361693,6.6415524],[-9.638427,6.6441953],[-9.6405374,6.6467898],[-9.6437718,6.6469812],[-9.6499511,6.6505992],[-9.6522382,6.652104],[-9.6548556,6.6538265],[-9.6596612,6.6562698],[-9.660938,6.6582281],[-9.6629956,6.6578336],[-9.6657398,6.6577315],[-9.668484,6.6577278],[-9.6703486,6.6594897],[-9.6716247,6.6608595],[-9.6731922,6.6605634],[-9.6751544,6.6600316],[-9.6725515,6.6646596],[-9.6726468,6.6650699],[-9.6724821,6.6651702],[-9.6728053,6.6672513],[-9.6752445,6.6727505],[-9.6802567,6.6752476],[-9.680481,6.6746706],[-9.684997,6.6657461],[-9.6862849,6.6666703],[-9.6868749,6.6680416],[-9.6879545,6.6690198],[-9.6885421,6.668725],[-9.6895212,6.6679395],[-9.6905011,6.6679381],[-9.6910901,6.6686236],[-9.6910912,6.6694072],[-9.6923675,6.6708753],[-9.6924671,6.6719533],[-9.6926663,6.6743048],[-9.6940408,6.6758705],[-9.6945568,6.6758958],[-9.6960011,6.6759661],[-9.6975683,6.6752776],[-9.7004098,6.674784],[-9.7013914,6.6757623],[-9.7048219,6.6757574],[-9.707862,6.676929],[-9.7086981,6.6791613],[-9.7084067,6.6809952],[-9.7086059,6.6830528],[-9.7085102,6.6847184],[-9.7124372,6.6892207],[-9.7191104,6.6947966],[-9.7209296,6.6989587],[-9.7227967,6.7021897],[-9.7274113,6.7073766],[-9.7309451,6.7108991],[-9.7341822,6.7126581],[-9.7359496,6.7147132],[-9.7385968,6.7151994],[-9.7399166,6.7187635],[-9.7403193,6.7198799],[-9.7431663,6.7227866],[-9.7452314,6.7271936],[-9.749651,6.7328701],[-9.7507328,6.7351225],[-9.7507763,6.7365397],[-9.750974,6.7433918],[-9.7518996,6.7461327],[-9.7822284,6.7364548],[-9.7908563,6.7325876],[-9.7929169,6.7316639],[-9.7995562,6.7271124],[-9.8152144,6.7163776],[-9.8213181,6.7098018],[-9.8252413,6.705575],[-9.8310354,6.6983359],[-9.8449163,6.6809937],[-9.8491378,6.6717429],[-9.8530695,6.6631263],[-9.8538058,6.6586618],[-9.8567962,6.6550844],[-9.8631797,6.6474472],[-9.8634573,6.6471154],[-9.867358,6.6445054],[-9.8676961,6.6442791],[-9.8672166,6.6438967],[-9.8673865,6.6422988],[-9.8687641,6.6412206],[-9.8689587,6.6414419],[-9.8692061,6.6413072],[-9.8698574,6.6409524],[-9.8699812,6.6403326],[-9.870839,6.6360403],[-9.8701269,6.6353711],[-9.871441,6.633393],[-9.8704762,6.6305156],[-9.870876,6.6287929],[-9.871546,6.625908],[-9.8718152,6.6253926],[-9.8731921,6.6230339],[-9.8737626,6.6228893],[-9.881414,6.6209481],[-9.8873911,6.6090347],[-9.8906445,6.6056365],[-9.8928063,6.6067129],[-9.9009564,6.6148331],[-9.9073813,6.6204536],[-9.9205379,6.628251],[-9.922524,6.628462],[-9.9236795,6.6414692],[-9.9168131,6.6557768],[-9.9147912,6.666757],[-9.9189556,6.6782558],[-9.921138,6.6794901],[-9.9232428,6.6806213],[-9.9253478,6.6816688],[-9.9300685,6.6813739],[-9.9319625,6.6815931],[-9.9325416,6.6812194],[-9.9331089,6.6811839],[-9.9401196,6.6764915],[-9.9416556,6.6754637],[-9.9423319,6.675234],[-9.9524241,6.6727278],[-9.952817,6.6727141],[-9.9562886,6.6725915],[-9.9574118,6.6734706],[-9.9582613,6.6736103],[-9.9619498,6.6770215],[-9.963684,6.6786252],[-9.9681579,6.6827624],[-9.9745661,6.6841421],[-9.9776711,6.6851783],[-9.9783356,6.6849537],[-9.9789819,6.6850926],[-9.9905689,6.6808139],[-9.9909476,6.6806102],[-9.9990917,6.6762669],[-9.9994702,6.6760649],[-10.0056077,6.679191],[-10.0068431,6.6797453],[-10.0094321,6.6799683],[-10.0148411,6.6804343],[-10.0219884,6.6822183],[-10.0286669,6.6878991],[-10.0292627,6.6879883],[-10.0350862,6.688858],[-10.036242,6.6884966],[-10.040135,6.6872798],[-10.0419027,6.6867271],[-10.0439714,6.6853141],[-10.0443952,6.6850972],[-10.0446995,6.6848829],[-10.0477745,6.682717],[-10.0494842,6.6822],[-10.0516106,6.6810078],[-10.0538312,6.6808861],[-10.0548259,6.6805855],[-10.0557059,6.6805661],[-10.0560651,6.6796885],[-10.0560634,6.6788853],[-10.0562999,6.6782901],[-10.0634992,6.6798738],[-10.064699,6.6802906],[-10.0704112,6.681376],[-10.0706312,6.6815101],[-10.0739658,6.6810754],[-10.0741723,6.681291],[-10.0758081,6.6818815],[-10.0777844,6.6818772],[-10.0888492,6.686556],[-10.0950735,6.6904307],[-10.0983502,6.6905325],[-10.101338,6.6905258],[-10.1031331,6.6905218],[-10.1035818,6.6905208],[-10.1046146,6.6905648],[-10.1050712,6.6905842],[-10.1142629,6.6919076],[-10.1147049,6.6918479],[-10.1163902,6.6959999],[-10.1196686,6.6967364],[-10.1184932,6.6974211],[-10.1173065,6.6981125],[-10.1180431,6.699424],[-10.1183666,6.6995753],[-10.1220459,6.7012961],[-10.1230797,6.7015362],[-10.124263,6.7012108],[-10.1257394,6.7011537],[-10.1295301,6.7026249],[-10.1308064,6.7017277],[-10.133726,6.7000506],[-10.1349987,6.7000651],[-10.1354468,6.7000703],[-10.1374475,6.699497],[-10.1390004,6.7001118],[-10.1415049,6.7011032],[-10.1466797,6.7031521],[-10.1475701,6.7034711],[-10.1569816,6.6981236],[-10.1583754,6.6973318],[-10.1612017,6.695653],[-10.1635702,6.6933004],[-10.1690025,6.6947488],[-10.1748536,6.6966137],[-10.1751863,6.6972749],[-10.1758936,6.6986807],[-10.1763225,6.6995332],[-10.1758267,6.7009849],[-10.1756139,6.7016077],[-10.1752293,6.702733],[-10.1718645,6.7066769],[-10.1734637,6.7121098],[-10.1737974,6.7131027],[-10.1749059,6.7164012],[-10.1755958,6.7184537],[-10.1754412,6.7199967],[-10.175064,6.7213667],[-10.1751266,6.7233348],[-10.1747331,6.7263689],[-10.1746703,6.7268535],[-10.1746187,6.727251],[-10.1745013,6.7275882],[-10.1741621,6.7291333],[-10.172256,6.7374619],[-10.1718237,6.7392091],[-10.1709967,6.7427598],[-10.1682302,6.7464898],[-10.1680656,6.7467118],[-10.1634268,6.7504107],[-10.1619707,6.7515718],[-10.1495226,6.7523695],[-10.1456978,6.7599073],[-10.1457068,6.7637404],[-10.145717,6.7680505],[-10.1504049,6.7747966],[-10.1502053,6.7811004],[-10.1416801,6.7966597],[-10.1406497,6.7985406],[-10.1394727,6.8004172],[-10.139116,6.8010494],[-10.1344393,6.8094094],[-10.1218754,6.8271086],[-10.1217418,6.8315655],[-10.1216902,6.8332935],[-10.1156545,6.8321016],[-10.1087909,6.8329752],[-10.1063998,6.8350333],[-10.1036016,6.8394715],[-10.0970052,6.8446905],[-10.0882023,6.848313],[-10.0793935,6.849534],[-10.0724132,6.8513812],[-10.0724311,6.8516598],[-10.0730419,6.861231],[-10.0749656,6.8669564],[-10.0727512,6.8736457],[-10.0730874,6.881603],[-10.0724133,6.8989788],[-10.078767,6.8992111],[-10.112606,6.900148],[-10.1268181,6.9004527],[-10.1319704,6.9006952],[-10.144244,6.8991862],[-10.1483403,6.8964767],[-10.1591035,6.893998],[-10.1644642,6.8919398],[-10.1663655,6.89121],[-10.174003,6.8882768],[-10.1850619,6.8839473],[-10.1899664,6.8800473],[-10.1924267,6.8780905],[-10.1977909,6.8713167],[-10.2020126,6.8690236],[-10.2188237,6.8598935],[-10.2296697,6.8547515],[-10.2321822,6.8535603],[-10.2382864,6.8521637],[-10.245088,6.8506075],[-10.2564678,6.8396998],[-10.2584287,6.8378203],[-10.279183,6.8256344],[-10.2808092,6.82468],[-10.2812979,6.8243932],[-10.2865146,6.8208455],[-10.2940787,6.8200492],[-10.2985011,6.819584],[-10.3167867,6.81723],[-10.3258331,6.8157306],[-10.3309219,6.8148868],[-10.3363005,6.8129072],[-10.3405958,6.8113263],[-10.3439959,6.8063881],[-10.3447295,6.8053228],[-10.3447143,6.7998639],[-10.3447115,6.7988697],[-10.3451069,6.7981994],[-10.3525134,6.7856353],[-10.3575327,6.7839471],[-10.3581225,6.7837487],[-10.3621876,6.7823819],[-10.3667769,6.7746871],[-10.3778219,6.7719749],[-10.3781591,6.7721401],[-10.3945053,6.7720258],[-10.4035463,6.7719783],[-10.4125559,6.7719307],[-10.4348204,6.7718123],[-10.4347547,6.7754914],[-10.4404027,6.775976],[-10.4481222,6.7756355],[-10.4520355,6.7757295],[-10.4526142,6.7761895],[-10.4546424,6.7756441],[-10.4570798,6.7792744],[-10.4584347,6.7813063],[-10.4604126,6.783105],[-10.4652906,6.7874243],[-10.468895,6.7902682],[-10.4741922,6.793212],[-10.4791195,6.7963157],[-10.4857984,6.8014753],[-10.490468,6.8066696],[-10.4921672,6.8089614],[-10.4934032,6.8104191],[-10.4955641,6.8129682],[-10.4997542,6.8169195],[-10.5029238,6.8193641],[-10.5043127,6.8203942],[-10.5068599,6.8231347],[-10.509898,6.8308588]]]]}]}
