# Supplementary material
Source: ML conference proceedings conference paper supplement (https://proceedings.neurips.cc/paper_files/paper/2022/hash/9d3faa41886997cfc2128b930077fa49-Abstract.html)
Supplement: Supplementary file 1 [file 9d3faa41886997cfc2128b930077fa49-Supplemental-Conference.zip › code/ebola/map/geojson/conakry.geojson]

{"type":"GeometryCollection","geometries":[{"type":"MultiPolygon","coordinates":[[[[-13.830564,9.4696721],[-13.8304246,9.4699579],[-13.8302153,9.4701695],[-13.8299471,9.4703917],[-13.8298721,9.4705981],[-13.8298398,9.4708785],[-13.8296574,9.4715717],[-13.8293034,9.4725665],[-13.829062,9.4732914],[-13.8288581,9.4738787],[-13.8286489,9.4742279],[-13.8284665,9.4744078],[-13.8283753,9.474556],[-13.8283163,9.4747623],[-13.8279408,9.475556],[-13.8276619,9.4758259],[-13.8274902,9.4760005],[-13.8271308,9.4764026],[-13.8269699,9.4764979],[-13.8268089,9.4766301],[-13.8266587,9.4767783],[-13.8265246,9.4769],[-13.8263583,9.4770587],[-13.8262457,9.477154],[-13.8260847,9.4773074],[-13.8257897,9.4776725],[-13.8254945,9.47807],[-13.8252157,9.4783445],[-13.8250279,9.4785403],[-13.8246095,9.4793657],[-13.8244701,9.4794715],[-13.8243414,9.4795297],[-13.8240624,9.4796514],[-13.8240088,9.4797943],[-13.8240141,9.4801541],[-13.8240999,9.4806038],[-13.8241215,9.4810747],[-13.8239873,9.4817361],[-13.8239552,9.4822017],[-13.8239122,9.4824187],[-13.823842,9.482502],[-13.8236654,9.4825668],[-13.8230056,9.4826568],[-13.8228018,9.4825404],[-13.8225268,9.4823117],[-13.8223834,9.4822494],[-13.8220668,9.4822229],[-13.8215512,9.4823955],[-13.8212354,9.4825562],[-13.8211174,9.4825827],[-13.8210047,9.4825615],[-13.8208062,9.4824293],[-13.8206507,9.4823869],[-13.8204414,9.482461],[-13.8201572,9.4825245],[-13.8198942,9.4826197],[-13.8194007,9.4828102],[-13.8190466,9.483006],[-13.8188642,9.4831541],[-13.8182581,9.4834716],[-13.817912,9.4838667],[-13.8177163,9.4839372],[-13.8174695,9.4838526],[-13.81733,9.4836885],[-13.8172711,9.4835457],[-13.8171583,9.483461],[-13.8169814,9.4834346],[-13.8167775,9.4834822],[-13.8164771,9.4836145],[-13.8162518,9.4837044],[-13.815769,9.4839637],[-13.8153505,9.4843341],[-13.815195,9.4844346],[-13.8149482,9.484588],[-13.8146585,9.4847944],[-13.8143903,9.4849743],[-13.8141221,9.4851859],[-13.8139182,9.4853976],[-13.813576,9.485818],[-13.8133711,9.4861224],[-13.813237,9.486387],[-13.8131404,9.486551],[-13.8129446,9.486887],[-13.8128722,9.4870272],[-13.8128158,9.4870669],[-13.8127461,9.4870722],[-13.8126603,9.4869902],[-13.8125637,9.4869134],[-13.8124967,9.4868843],[-13.8124678,9.4868929],[-13.8124403,9.4869293],[-13.8124806,9.4870404],[-13.8125503,9.4871463],[-13.8125825,9.487223],[-13.8126093,9.4873394],[-13.8126066,9.4874055],[-13.8125691,9.4874743],[-13.8122901,9.4879426],[-13.8121051,9.4884399],[-13.8119656,9.4887468],[-13.8118154,9.4890484],[-13.8115203,9.4894452],[-13.8112468,9.489842],[-13.8111717,9.4901013],[-13.811059,9.4903976],[-13.8108605,9.4906304],[-13.8105011,9.4908473],[-13.8102758,9.4909743],[-13.8101041,9.4910748],[-13.8098842,9.4911383],[-13.809616,9.4914558],[-13.8095033,9.4916463],[-13.8094068,9.4918473],[-13.8092887,9.4919955],[-13.80916,9.4921383],[-13.8090152,9.4922494],[-13.8088381,9.4923235],[-13.8086654,9.4924987],[-13.8085354,9.4926648],[-13.8084312,9.4928139],[-13.8083173,9.4929482],[-13.8081766,9.4930815],[-13.8080429,9.493223],[-13.8079369,9.4933182],[-13.8077812,9.4934834],[-13.8076633,9.493629],[-13.8075185,9.4937944],[-13.8074199,9.4940864],[-13.80732,9.4943817],[-13.8070893,9.494715],[-13.8067675,9.4950113],[-13.8066173,9.4950589],[-13.8063544,9.4950801],[-13.8063169,9.495133],[-13.8063276,9.4952547],[-13.8063812,9.4953658],[-13.8065904,9.4954981],[-13.8066065,9.4956356],[-13.8065368,9.4957997],[-13.8061184,9.4962864],[-13.8059199,9.4966727],[-13.8058341,9.4974451],[-13.8054961,9.4986144],[-13.8052815,9.4989054],[-13.8049275,9.4992758],[-13.8046968,9.4994398],[-13.8045734,9.4995403],[-13.8044554,9.499625],[-13.8042784,9.4997414],[-13.8040477,9.4999212],[-13.8037527,9.5000747],[-13.8035756,9.5001752],[-13.8032752,9.5003339],[-13.8030365,9.5005297],[-13.8029346,9.5006964],[-13.8028582,9.5009059],[-13.8027871,9.5011011],[-13.8026369,9.5016037],[-13.8025671,9.5017148],[-13.8024948,9.5017889],[-13.8024384,9.5018392],[-13.8023365,9.5019212],[-13.8016646,9.5022364],[-13.8014942,9.5023921],[-13.8013977,9.5026196],[-13.8014219,9.5027889],[-13.801599,9.5029846],[-13.8016858,9.5031694],[-13.8017518,9.5037306],[-13.8015402,9.5043222],[-13.8013595,9.5047931],[-13.8010329,9.5054607],[-13.8006976,9.5059977],[-13.800424,9.5063284],[-13.8001129,9.506548],[-13.7998045,9.5067173],[-13.7992091,9.5068522],[-13.7985921,9.506921],[-13.7975916,9.5070718],[-13.7973584,9.5072463],[-13.797192,9.5075109],[-13.7968648,9.507905],[-13.7963712,9.5079897],[-13.7957061,9.507905],[-13.7954379,9.5079421],[-13.7952448,9.5080849],[-13.7950463,9.5082119],[-13.7946439,9.5083283],[-13.7942417,9.5082648],[-13.7938018,9.5082648],[-13.7935604,9.5083177],[-13.7933243,9.5084288],[-13.7930882,9.5085346],[-13.7927396,9.5086563],[-13.7923319,9.5086881],[-13.7920959,9.5087463],[-13.7919349,9.5088203],[-13.791554,9.5090161],[-13.7911839,9.5091854],[-13.790908,9.509451],[-13.7910229,9.5101007],[-13.7912218,9.5102563],[-13.7915111,9.5103917],[-13.791849,9.5105028],[-13.7926322,9.5106509],[-13.7930453,9.5106351],[-13.7933511,9.5106774],[-13.7935388,9.5108149],[-13.7937963,9.5110689],[-13.7941236,9.511344],[-13.7942765,9.5113784],[-13.7944186,9.5113281],[-13.7947244,9.5111112],[-13.7952554,9.5109419],[-13.7956354,9.5106452],[-13.7960547,9.5103176],[-13.7963552,9.5102171],[-13.7966689,9.5102516],[-13.7969775,9.5104657],[-13.7972456,9.5106827],[-13.7974764,9.5107303],[-13.7976925,9.5107963],[-13.797825,9.5108996],[-13.7980236,9.5112064],[-13.7981255,9.5112858],[-13.7982274,9.5112805],[-13.7983561,9.5112329],[-13.7984313,9.5111165],[-13.7984849,9.5109631],[-13.7986618,9.5108202],[-13.7993431,9.5105187],[-13.7994934,9.5105292],[-13.7995899,9.5106086],[-13.7995524,9.510852],[-13.799531,9.5110636],[-13.7996436,9.511344],[-13.7997615,9.5114974],[-13.7998957,9.5115186],[-13.8000996,9.511471],[-13.8003409,9.5114392],[-13.8006789,9.5113969],[-13.8009363,9.5117514],[-13.801154,9.512063],[-13.801413,9.512322],[-13.801672,9.512581],[-13.8018858,9.5128889],[-13.80193,9.513097],[-13.8019824,9.5133121],[-13.8021541,9.5136454],[-13.802445,9.51413],[-13.802704,9.514388],[-13.803066,9.5145872],[-13.8033289,9.5148358],[-13.8034415,9.5150157],[-13.803522,9.5151797],[-13.8035703,9.5153966],[-13.8036588,9.5160024],[-13.8038305,9.516132],[-13.8041067,9.5162193],[-13.8044071,9.5161796],[-13.805008,9.5158781],[-13.8050295,9.5157167],[-13.8050106,9.5155474],[-13.8048524,9.5152961],[-13.804536,9.5151691],[-13.8044394,9.5150527],[-13.8044314,9.5149046],[-13.80452,9.514652],[-13.8046485,9.514402],[-13.8048953,9.5141004],[-13.8050991,9.5136825],[-13.8052386,9.5130211],[-13.8055444,9.5128836],[-13.8068372,9.5127725],[-13.8074112,9.5127884],[-13.8076633,9.5126984],[-13.8079208,9.5124127],[-13.8079638,9.5122011],[-13.8080871,9.512],[-13.8083125,9.5118995],[-13.8087523,9.5119842],[-13.8092942,9.5119418],[-13.809593,9.511705],[-13.809853,9.511448],[-13.8101739,9.5111641],[-13.8107157,9.5107673],[-13.8108874,9.5107779],[-13.8110108,9.5108361],[-13.8112468,9.5111165],[-13.8113917,9.5111218],[-13.8115311,9.5110583],[-13.8117618,9.5109049],[-13.811869,9.510762],[-13.8121319,9.5103388],[-13.81225,9.5099982],[-13.812326,9.509782],[-13.8123679,9.5095081],[-13.8123895,9.5093282],[-13.8124757,9.5091155],[-13.812588,9.5089685],[-13.8127975,9.5088043],[-13.8130868,9.5085505],[-13.8134193,9.5082701],[-13.8135856,9.5081008],[-13.8138812,9.5078795],[-13.814165,9.5075453],[-13.8144547,9.5070374],[-13.814673,9.506697],[-13.814933,9.50644],[-13.815194,9.506184],[-13.815455,9.505927],[-13.8157797,9.5056882],[-13.8159246,9.5054237],[-13.8160801,9.5050322],[-13.8162299,9.5046391],[-13.8164824,9.5041645],[-13.8169357,9.5037726],[-13.8170905,9.5030751],[-13.8170135,9.5028719],[-13.8168365,9.5025402],[-13.8166542,9.5024238],[-13.8165094,9.502281],[-13.8164396,9.5021169],[-13.816507,9.501807],[-13.8166564,9.5016169],[-13.8167667,9.5012545],[-13.8168311,9.500826],[-13.8170242,9.5004027],[-13.8172549,9.5001276],[-13.8175875,9.4995773],[-13.817814,9.499234],[-13.818081,9.4987308],[-13.8184351,9.498334],[-13.8185638,9.4981276],[-13.8186121,9.4976938],[-13.8187892,9.4975721],[-13.8193272,9.4975239],[-13.8193792,9.4973922],[-13.8191539,9.4970271],[-13.8191218,9.4969055],[-13.8191485,9.4965457],[-13.8191044,9.4963408],[-13.8189447,9.4959848],[-13.818918,9.4958473],[-13.8189341,9.4957811],[-13.818994,9.495758],[-13.8191725,9.4957504],[-13.8193309,9.4955034],[-13.8193953,9.4951912],[-13.8193846,9.495043],[-13.8194597,9.4949108],[-13.8197386,9.4947626],[-13.8198513,9.4945669],[-13.8198996,9.4944187],[-13.819978,9.4942974],[-13.8201678,9.4939954],[-13.8203555,9.4937044],[-13.820377,9.493551],[-13.8203181,9.4932494],[-13.8203555,9.4930325],[-13.820432,9.492799],[-13.8205701,9.4923447],[-13.8205916,9.4919531],[-13.8206023,9.4915881],[-13.820731,9.4912865],[-13.8208277,9.4912124],[-13.8209779,9.4911859],[-13.8212407,9.4912071],[-13.8214339,9.491133],[-13.8216054,9.490969],[-13.8216698,9.4905299],[-13.821745,9.4904188],[-13.8219005,9.4903658],[-13.8222975,9.4904664],[-13.8227105,9.4905087],[-13.8231826,9.4904452],[-13.823945,9.490105],[-13.8244915,9.4898738],[-13.825245,9.489594],[-13.8255644,9.4894135],[-13.826026,9.489081],[-13.8262242,9.4889637],[-13.8267124,9.4888526],[-13.8269323,9.4885828],[-13.8271737,9.4882071],[-13.8272971,9.4880008],[-13.8275517,9.4875306],[-13.82772,9.487154],[-13.8278925,9.4868367],[-13.8280803,9.4865986],[-13.8282949,9.4863976],[-13.8285578,9.4862018],[-13.8289354,9.486081],[-13.8291854,9.4861119],[-13.829459,9.4860272],[-13.8297164,9.4857256],[-13.829932,9.485486],[-13.8301939,9.4851912],[-13.8303655,9.4849267],[-13.8305212,9.4848261],[-13.8306713,9.4848579],[-13.830972,9.484974],[-13.831491,9.484975],[-13.832271,9.48472],[-13.8325328,9.4845404],[-13.8327742,9.4843817],[-13.8330263,9.48426],[-13.8334072,9.4841065],[-13.8337559,9.4839266],[-13.8341045,9.4838155],[-13.834352,9.483568],[-13.8344479,9.4833129],[-13.8345659,9.4830536],[-13.8346517,9.4828155],[-13.8347107,9.4826039],[-13.834818,9.4824504],[-13.8349146,9.4823552],[-13.8350058,9.4821647],[-13.8350916,9.4819583],[-13.8351613,9.4817308],[-13.8351882,9.4814663],[-13.8352311,9.4812335],[-13.8354081,9.4809001],[-13.8356549,9.4804662],[-13.835907,9.4799371],[-13.8361377,9.4795985],[-13.8362538,9.4793314],[-13.8363254,9.4791117],[-13.8363272,9.4787689],[-13.8362825,9.4785032],[-13.836304,9.4781381],[-13.8363951,9.4776513],[-13.8364327,9.4774344],[-13.8364005,9.4772386],[-13.8363469,9.4769476],[-13.8364005,9.4764767],[-13.8365668,9.4760481],[-13.8367707,9.4756142],[-13.8369423,9.4751116],[-13.8372105,9.4745613],[-13.837527,9.4738893],[-13.8376719,9.4734131],[-13.8377792,9.4729527],[-13.8379884,9.4725083],[-13.8383853,9.4720215],[-13.8388145,9.4711854],[-13.8389598,9.4705925],[-13.8392344,9.4698799],[-13.8395494,9.4691642],[-13.839646,9.4689631],[-13.8401986,9.468307],[-13.8402845,9.4681006],[-13.8402897,9.4678995],[-13.8401127,9.4675662],[-13.8397479,9.4669471],[-13.8393295,9.466291],[-13.838761,9.4660052],[-13.838541,9.4659629],[-13.8381922,9.465947],[-13.837908,9.4657036],[-13.8377416,9.465238],[-13.8375613,9.4646098],[-13.8373104,9.464156],[-13.8371515,9.4638993],[-13.837001,9.4636899],[-13.8368128,9.4635249],[-13.8366831,9.4634052],[-13.8365968,9.4633474],[-13.8364542,9.4632484],[-13.8362396,9.4629203],[-13.8361806,9.4627034],[-13.8362498,9.4617576],[-13.8363418,9.4610234],[-13.8363761,9.460637],[-13.8363771,9.460379],[-13.8362129,9.4599042],[-13.8360783,9.4596497],[-13.8360114,9.4595136],[-13.8359905,9.4593032],[-13.8360733,9.4589147],[-13.8361914,9.4588036],[-13.8362396,9.458666],[-13.8362504,9.4583961],[-13.8361269,9.4581157],[-13.8360304,9.4578088],[-13.8360733,9.4574437],[-13.8360894,9.4572638],[-13.8359392,9.4569939],[-13.8357515,9.4568987],[-13.8355529,9.4567399],[-13.835392,9.4565071],[-13.8352257,9.4560467],[-13.8349092,9.4554699],[-13.8347107,9.45529],[-13.8345927,9.4551577],[-13.8344586,9.4550255],[-13.8339222,9.4546762],[-13.833214,9.4543746],[-13.8326615,9.4542],[-13.8323128,9.4542423],[-13.8321358,9.4543058],[-13.8319641,9.454327],[-13.831653,9.4543005],[-13.8314492,9.4540994],[-13.831256,9.4536391],[-13.8311112,9.4533745],[-13.8308376,9.4531046],[-13.8305211,9.452676],[-13.8303226,9.4524749],[-13.8302261,9.4523426],[-13.8297595,9.4517817],[-13.8296628,9.4516071],[-13.8296254,9.4512737],[-13.8296145,9.4510515],[-13.8296307,9.4505012],[-13.8295771,9.4501784],[-13.8294482,9.4499561],[-13.8292122,9.4498979],[-13.8289869,9.4499508],[-13.828842,9.4502154],[-13.8287616,9.4504482],[-13.8287778,9.4506864],[-13.8289763,9.4509086],[-13.8290406,9.4510144],[-13.8290084,9.4511309],[-13.8289011,9.4512367],[-13.8286597,9.4512473],[-13.8284934,9.4513161],[-13.8284075,9.4514484],[-13.8283324,9.4516336],[-13.8282305,9.4519087],[-13.828134,9.4524273],[-13.8279785,9.4526548],[-13.8277854,9.4526918],[-13.8276243,9.4527448],[-13.827603,9.4529669],[-13.8276191,9.4531416],[-13.8276459,9.4534802],[-13.8276887,9.4537131],[-13.82815,9.4548826],[-13.8283646,9.45529],[-13.8284773,9.4554646],[-13.8285953,9.4557768],[-13.8287884,9.4562372],[-13.8289654,9.4569674],[-13.8289762,9.4572691],[-13.829118,9.457778],[-13.8292927,9.4580628],[-13.8294911,9.4585866],[-13.8296038,9.4590153],[-13.8297325,9.4591952],[-13.8298827,9.4593962],[-13.8301671,9.4596291],[-13.8302154,9.4597083],[-13.8302262,9.4598724],[-13.8302153,9.4601905],[-13.8303174,9.4603962],[-13.8304303,9.460595],[-13.8306004,9.4607142],[-13.8306365,9.4607772],[-13.8306312,9.4609042],[-13.8306069,9.4610789],[-13.8304031,9.4614176],[-13.8300463,9.461825],[-13.8301778,9.4620896],[-13.830666,9.4618568],[-13.8309208,9.4618065],[-13.8311998,9.461944],[-13.8315512,9.462317],[-13.8315713,9.4623608],[-13.8315953,9.4624481],[-13.831633,9.462481],[-13.8317336,9.4624878],[-13.8318476,9.4625394],[-13.8319749,9.4626743],[-13.8323021,9.4631796],[-13.8324524,9.463431],[-13.8324496,9.4636347],[-13.8321599,9.4643596],[-13.8318488,9.4646824],[-13.8317765,9.4648464],[-13.8317175,9.4650898],[-13.8316208,9.4662645],[-13.8313633,9.4672699],[-13.8311327,9.468053],[-13.8307571,9.4689684],[-13.830564,9.4696721]]],[[[-13.8292632,9.4487126],[-13.8293383,9.4486782],[-13.8294166,9.4486347],[-13.8294992,9.4485512],[-13.8295689,9.4483951],[-13.8295394,9.4482919],[-13.829459,9.448239],[-13.8294336,9.4481838],[-13.8294208,9.4480658],[-13.8293865,9.4479797],[-13.8293781,9.4479057],[-13.829298,9.4477892],[-13.8292364,9.4477891],[-13.829203,9.4478173],[-13.8291688,9.4479479],[-13.8291532,9.4480405],[-13.8291218,9.448226],[-13.8290861,9.4483342],[-13.8290674,9.4484533],[-13.8290407,9.4485293],[-13.829062,9.448601],[-13.8290962,9.4486304],[-13.8291478,9.4486385],[-13.8292034,9.4486722],[-13.8292185,9.4487079],[-13.8292632,9.4487126]]],[[[-13.8150678,9.434826],[-13.814916,9.4349117],[-13.8146317,9.4349223],[-13.8145299,9.4349488],[-13.8144816,9.4350228],[-13.8145506,9.4353624],[-13.8146683,9.4357649],[-13.8148077,9.4360988],[-13.8149589,9.4362558],[-13.8152112,9.4363141],[-13.8154739,9.4364516],[-13.8155545,9.4365284],[-13.8155895,9.4366242],[-13.8155544,9.4369279],[-13.8155666,9.4369689],[-13.8156027,9.437002],[-13.8158012,9.4370232],[-13.8159059,9.4370569],[-13.8159943,9.4371026],[-13.8160205,9.4371323],[-13.8160326,9.4371353],[-13.8160426,9.4371296],[-13.8160755,9.4370773],[-13.8161552,9.4369332],[-13.8161982,9.4369067],[-13.8162464,9.4368962],[-13.8164613,9.4369241],[-13.8165415,9.4368538],[-13.8166051,9.436715],[-13.8165659,9.4364966],[-13.8165684,9.4363511],[-13.8165617,9.4359848],[-13.8165667,9.43559],[-13.8164887,9.4351875],[-13.8164428,9.4350633],[-13.8163017,9.434988],[-13.8161054,9.4350422],[-13.8159729,9.4351075],[-13.8158656,9.4350863],[-13.8157154,9.4349488],[-13.8155759,9.4348376],[-13.8153195,9.4347515],[-13.8150678,9.434826]]],[[[-13.7950999,9.4667354],[-13.7950462,9.4667645],[-13.7949848,9.4669554],[-13.7949684,9.4670079],[-13.7948818,9.4674235],[-13.794921,9.4676903],[-13.7949818,9.4677963],[-13.7951025,9.4679233],[-13.795374,9.4680438],[-13.795521,9.4680212],[-13.7956336,9.4679868],[-13.7957089,9.4679368],[-13.7957087,9.4678731],[-13.7957329,9.4677884],[-13.7957788,9.4677229],[-13.7957865,9.4676667],[-13.7957892,9.4676164],[-13.7957624,9.4675609],[-13.795749,9.4675238],[-13.795765,9.467463],[-13.7957704,9.4673704],[-13.7957597,9.4672328],[-13.7956765,9.4670847],[-13.7955505,9.46691],[-13.7952722,9.4666755],[-13.7951642,9.4666984],[-13.7950999,9.4667354]]],[[[-13.7926887,9.4621266],[-13.7924875,9.4623727],[-13.7922327,9.4625976],[-13.7920529,9.4626611],[-13.7917873,9.4626652],[-13.7916774,9.4626849],[-13.7915835,9.4627378],[-13.7915031,9.4628542],[-13.7913985,9.4629838],[-13.7913154,9.4630261],[-13.7911759,9.4630208],[-13.790964,9.4630209],[-13.7903662,9.4631261],[-13.7900989,9.4632723],[-13.789899,9.4633899],[-13.7896524,9.4634045],[-13.7894485,9.4633621],[-13.7892956,9.4633225],[-13.7892098,9.4632166],[-13.7890773,9.4631578],[-13.7889818,9.4631425],[-13.7886706,9.4631029],[-13.7882299,9.4629671],[-13.7879008,9.4627616],[-13.7877158,9.4626478],[-13.7873954,9.4624141],[-13.7872651,9.4621584],[-13.7872545,9.4620392],[-13.7872142,9.4619308],[-13.7871821,9.4618778],[-13.787131,9.4618435],[-13.7870962,9.4618567],[-13.7870614,9.4619228],[-13.7870399,9.4620234],[-13.7869781,9.4621822],[-13.7868763,9.4623436],[-13.78682,9.4623832],[-13.7867314,9.4623912],[-13.7866617,9.4623832],[-13.7866058,9.4623346],[-13.7864471,9.4622377],[-13.7862487,9.4622166],[-13.7859839,9.4622838],[-13.7855324,9.4624891],[-13.7852992,9.4626293],[-13.7850336,9.4628383],[-13.7849101,9.4629256],[-13.7847111,9.4631006],[-13.7846581,9.4631769],[-13.7846306,9.4632532],[-13.7846822,9.463468],[-13.7847278,9.463804],[-13.7847118,9.4639284],[-13.7844729,9.4642855],[-13.7843181,9.4645691],[-13.7842584,9.4647803],[-13.7841762,9.4650744],[-13.7841827,9.4652461],[-13.784318,9.4655258],[-13.7844301,9.4658385],[-13.7844166,9.4659682],[-13.784355,9.4660423],[-13.7841891,9.4660915],[-13.7840224,9.4662063],[-13.7838797,9.4663045],[-13.7835879,9.4664841],[-13.7834779,9.4665317],[-13.7834108,9.4666058],[-13.7833974,9.4666561],[-13.7833867,9.4666957],[-13.7833893,9.466746],[-13.783392,9.4668016],[-13.7833786,9.4668704],[-13.7833899,9.4669402],[-13.7833893,9.4670026],[-13.7834081,9.4670767],[-13.7834188,9.4671482],[-13.7833947,9.4672288],[-13.7833988,9.4672592],[-13.7834157,9.4672755],[-13.7834416,9.467289],[-13.7834679,9.4673016],[-13.7835088,9.4673108],[-13.7835366,9.4673009],[-13.78362,9.46725],[-13.7836723,9.4672394],[-13.783773,9.4672302],[-13.7838781,9.4672183],[-13.7839714,9.4672725],[-13.7840479,9.4673213],[-13.7841015,9.467373],[-13.7841337,9.4674074],[-13.7841739,9.4674326],[-13.7842315,9.467459],[-13.7842759,9.4674616],[-13.7843576,9.4674551],[-13.7844355,9.4675053],[-13.7847382,9.4675998],[-13.7849058,9.4677043],[-13.7849766,9.4677679],[-13.7850732,9.467814],[-13.7852312,9.4678394],[-13.785389,9.4678744],[-13.7855567,9.4679236],[-13.7857363,9.4680715],[-13.7858302,9.4681323],[-13.7859509,9.4681985],[-13.7861493,9.4682249],[-13.7862432,9.4682011],[-13.7863827,9.4681112],[-13.7865625,9.4678678],[-13.78682,9.467545],[-13.787276,9.4669021],[-13.7874288,9.466709],[-13.7875528,9.4665935],[-13.7876434,9.4665397],[-13.7878901,9.4663915],[-13.7881852,9.4661957],[-13.7883568,9.466037],[-13.7885232,9.4658994],[-13.7886465,9.4657618],[-13.7887806,9.4656507],[-13.7889523,9.465492],[-13.7891133,9.4653491],[-13.789258,9.4653226],[-13.7894895,9.4652792],[-13.7896827,9.4652379],[-13.7899598,9.4651489],[-13.7901501,9.4651107],[-13.7903401,9.465133],[-13.7908477,9.4650885],[-13.7911731,9.4650201],[-13.7913778,9.4649455],[-13.7916017,9.4647865],[-13.7918578,9.4645688],[-13.7920946,9.4643368],[-13.7923137,9.4640571],[-13.7924337,9.4639575],[-13.7925839,9.4639257],[-13.7927663,9.4638993],[-13.7929916,9.4638358],[-13.7932438,9.4638146],[-13.7935066,9.4638622],[-13.7940087,9.4639824],[-13.7944211,9.4641063],[-13.7947433,9.4641953],[-13.7949318,9.4643352],[-13.7950237,9.464421],[-13.7950994,9.4645609],[-13.7951397,9.4648008],[-13.7951558,9.4649121],[-13.7952025,9.4650058],[-13.7954168,9.4652077],[-13.7955135,9.4653809],[-13.795586,9.4657242],[-13.7956005,9.4659673],[-13.7956166,9.4661119],[-13.7956202,9.4662671],[-13.7956053,9.4663757],[-13.7956283,9.4664285],[-13.7956846,9.4664814],[-13.7957275,9.4665079],[-13.7957543,9.4665423],[-13.7958196,9.4666634],[-13.7958376,9.4667089],[-13.7958884,9.4667222],[-13.7959395,9.4666904],[-13.7959608,9.4666031],[-13.7960091,9.4664814],[-13.7960628,9.4664127],[-13.7961137,9.46641],[-13.7962047,9.4664425],[-13.7962739,9.4664584],[-13.7963078,9.466425],[-13.7963122,9.4663518],[-13.7963498,9.4663174],[-13.7964168,9.4662962],[-13.7964758,9.4663465],[-13.7965323,9.4663544],[-13.7965912,9.4663254],[-13.7966099,9.4662857],[-13.7966502,9.4662671],[-13.7967709,9.4663015],[-13.7968808,9.4663809],[-13.7971891,9.4664187],[-13.7976064,9.4663869],[-13.7979962,9.4663265],[-13.7983749,9.4662963],[-13.7985714,9.4662788],[-13.7988711,9.4662057],[-13.7990467,9.4661199],[-13.7991769,9.4660158],[-13.7992723,9.4659451],[-13.7993968,9.4658571],[-13.7994576,9.4657385],[-13.7995148,9.4655713],[-13.7995631,9.4654126],[-13.7996329,9.465238],[-13.7996918,9.4650157],[-13.7997927,9.4646228],[-13.7998474,9.4644654],[-13.7998797,9.4643002],[-13.7999225,9.4641797],[-13.799978,9.464011],[-13.7999925,9.4638187],[-13.8000244,9.4636188],[-13.8000489,9.4634262],[-13.8000569,9.4632974],[-13.8000405,9.4629627],[-13.8000459,9.4628304],[-13.8000566,9.4626928],[-13.8001317,9.462497],[-13.80018,9.4623542],[-13.8002041,9.4622563],[-13.8002309,9.4620975],[-13.8002202,9.4620234],[-13.8001826,9.4619275],[-13.8001263,9.4617986],[-13.8000888,9.4616874],[-13.800078,9.4616081],[-13.800078,9.461534],[-13.8000673,9.4613223],[-13.8000995,9.461108],[-13.8000888,9.4609493],[-13.8000968,9.4607244],[-13.8000754,9.4605551],[-13.8000539,9.4603804],[-13.800011,9.4602191],[-13.7999493,9.4599862],[-13.7999225,9.4598063],[-13.7999225,9.45942],[-13.7999091,9.4592507],[-13.7998942,9.459113],[-13.7998393,9.4588803],[-13.7997937,9.4587957],[-13.7996838,9.4586872],[-13.7995711,9.4586025],[-13.7994665,9.4585655],[-13.7993163,9.4585734],[-13.7991869,9.4585981],[-13.7988764,9.458629],[-13.7986296,9.4586713],[-13.7984071,9.4587189],[-13.7982488,9.458756],[-13.7981173,9.4588036],[-13.7979817,9.4588349],[-13.797833,9.4588724],[-13.7976801,9.4588724],[-13.7975997,9.458883],[-13.7975192,9.4588856],[-13.7974012,9.4589174],[-13.7972483,9.4589994],[-13.7971276,9.4591026],[-13.7970279,9.4592052],[-13.7968969,9.4592745],[-13.7966609,9.4593698],[-13.7964624,9.4594359],[-13.7962981,9.4594181],[-13.7961137,9.4593618],[-13.7959823,9.4592942],[-13.7958294,9.459174],[-13.7957052,9.4590351],[-13.7956497,9.4589676],[-13.7955692,9.4588697],[-13.7955156,9.4588009],[-13.7954512,9.4587189],[-13.7953761,9.4586607],[-13.7952393,9.4585602],[-13.7949792,9.4583723],[-13.7948638,9.4583088],[-13.7947485,9.4582718],[-13.7945715,9.4582771],[-13.7944324,9.458347],[-13.7942737,9.4584411],[-13.7941129,9.4585549],[-13.7939948,9.4586634],[-13.7938715,9.4587957],[-13.7937802,9.4589465],[-13.7936891,9.4591131],[-13.7936273,9.4592904],[-13.7935684,9.4594148],[-13.7935125,9.4595453],[-13.793461,9.4596767],[-13.7934142,9.4598377],[-13.7933511,9.4599413],[-13.7933109,9.4600339],[-13.793276,9.4602508],[-13.7932161,9.460556],[-13.7931676,9.4607213],[-13.7930882,9.460862],[-13.7930319,9.4609625],[-13.7930033,9.4610693],[-13.792984,9.4612155],[-13.7929675,9.4613197],[-13.7929515,9.4614123],[-13.7928897,9.4615631],[-13.7928334,9.4617615],[-13.7927797,9.4619652],[-13.7926887,9.4621266]]],[[[-13.7873536,9.4611821],[-13.7873806,9.4610181],[-13.7874449,9.4609308],[-13.7875495,9.4608646],[-13.7876245,9.460772],[-13.787536,9.4606424],[-13.787418,9.4605948],[-13.787249,9.4606344],[-13.7872009,9.460645],[-13.7871686,9.4607059],[-13.7871338,9.4608329],[-13.7871444,9.4609466],[-13.7871633,9.4610181],[-13.7872062,9.4610974],[-13.7872625,9.4611927],[-13.7873135,9.4612086],[-13.7873536,9.4611821]]],[[[-13.7688733,9.4321917],[-13.7686641,9.4322076],[-13.768339,9.4325337],[-13.7680549,9.4326817],[-13.7678925,9.4327522],[-13.766775,9.4330896],[-13.7664371,9.4331344],[-13.7659585,9.4330576],[-13.7656814,9.4330804],[-13.7652229,9.433194],[-13.7650055,9.4333082],[-13.7648845,9.4333974],[-13.7648553,9.4335251],[-13.7648554,9.4336205],[-13.7647373,9.4338812],[-13.7646314,9.4340043],[-13.7645185,9.434168],[-13.7643565,9.4343084],[-13.7642438,9.4344354],[-13.7640829,9.4346736],[-13.7638683,9.4349276],[-13.7636943,9.4351662],[-13.763522,9.4353429],[-13.7630406,9.4356973],[-13.7628961,9.4358601],[-13.7628597,9.4360335],[-13.7628705,9.4362505],[-13.7628382,9.436388],[-13.7626774,9.4365839],[-13.762313,9.4368883],[-13.7621195,9.4372322],[-13.7621194,9.4373035],[-13.7621409,9.4373538],[-13.7622697,9.4373388],[-13.7629515,9.4369297],[-13.7631944,9.436775],[-13.7634042,9.4367294],[-13.7635276,9.4366923],[-13.7636001,9.4366607],[-13.7636483,9.4366103],[-13.7636697,9.4365309],[-13.7636725,9.4362929],[-13.7636831,9.4361684],[-13.7637503,9.436113],[-13.7642354,9.4359156],[-13.7644954,9.4357817],[-13.7647149,9.4356361],[-13.7648954,9.4354612],[-13.7650466,9.4353669],[-13.7652875,9.4351922],[-13.7653801,9.4350397],[-13.7655304,9.4348896],[-13.7658206,9.4347536],[-13.7661229,9.4346038],[-13.7664616,9.4344432],[-13.7668427,9.4342706],[-13.7671778,9.4341412],[-13.767399,9.4340483],[-13.7675793,9.4339414],[-13.7677784,9.433826],[-13.7679357,9.4336703],[-13.7682167,9.4334789],[-13.768887,9.4330886],[-13.7692097,9.4328186],[-13.7692864,9.4326837],[-13.7692649,9.432488],[-13.7691039,9.4323345],[-13.7688733,9.4321917]]],[[[-13.761667,9.4375652],[-13.7612853,9.4377005],[-13.7611807,9.4377427],[-13.7611378,9.4377217],[-13.7611351,9.4376766],[-13.7611754,9.4376052],[-13.7611754,9.4375681],[-13.7611191,9.4375443],[-13.7610654,9.4375575],[-13.7609152,9.4376607],[-13.7608186,9.4377719],[-13.7606631,9.4379624],[-13.7605154,9.438096],[-13.7602581,9.4382641],[-13.7599818,9.4384228],[-13.7595902,9.4384863],[-13.7594212,9.4385578],[-13.7592238,9.4387391],[-13.7591852,9.4388778],[-13.759271,9.4390023],[-13.7594454,9.4391161],[-13.7596143,9.4392748],[-13.7598573,9.4392274],[-13.760271,9.4390218],[-13.7607753,9.4388115],[-13.7609367,9.4386662],[-13.7610305,9.4385287],[-13.7614597,9.4381953],[-13.7616689,9.4380894],[-13.761736,9.4379916],[-13.7618164,9.4378274],[-13.7617993,9.437693],[-13.7617789,9.4376157],[-13.761667,9.4375652]]],[[[-13.7457795,9.4542185],[-13.7458224,9.4545148],[-13.7458035,9.4548111],[-13.7456372,9.4550625],[-13.7450767,9.4557292],[-13.7449426,9.4560838],[-13.7449586,9.4565759],[-13.7441593,9.4577929],[-13.7439049,9.4582135],[-13.7435532,9.4589412],[-13.7435693,9.4592481],[-13.7436116,9.4594045],[-13.7436122,9.4599677],[-13.7434995,9.4603699],[-13.7430382,9.4612112],[-13.7428397,9.4614811],[-13.7426516,9.461484],[-13.742277,9.461472],[-13.7421852,9.461407],[-13.7420994,9.4612218],[-13.7420619,9.4607773],[-13.7420511,9.4606133],[-13.7419701,9.4605424],[-13.7416089,9.4605063],[-13.7414879,9.4605286],[-13.7414124,9.4606486],[-13.7414637,9.4618076],[-13.7416059,9.4619414],[-13.7418478,9.4619509],[-13.741976,9.4618038],[-13.7420672,9.4617668],[-13.7423247,9.4617668],[-13.7426199,9.4617827],[-13.7428558,9.4618991],[-13.7429094,9.4620261],[-13.7429775,9.4622602],[-13.7429054,9.4625255],[-13.7428397,9.4627563],[-13.7429738,9.4629098],[-13.7432259,9.4630103],[-13.7435639,9.4631161],[-13.7436497,9.4632061],[-13.7436819,9.463386],[-13.7435639,9.46355],[-13.7435354,9.4636581],[-13.7435532,9.4637723],[-13.743757,9.4639204],[-13.7438537,9.463968],[-13.7439662,9.4639469],[-13.7442635,9.4638551],[-13.7445394,9.4641772],[-13.744819,9.4645471],[-13.7450639,9.4651522],[-13.7450928,9.4661481],[-13.7450123,9.4667513],[-13.7450337,9.4669683],[-13.745241,9.467281],[-13.7455,9.46754],[-13.7456989,9.4677408],[-13.7457311,9.4678413],[-13.745774,9.4680636],[-13.745755,9.468572],[-13.745752,9.469603],[-13.7458261,9.4706262],[-13.7457633,9.4707886],[-13.7456497,9.4708844],[-13.7454343,9.4708889],[-13.7452376,9.4707568],[-13.7451679,9.4707621],[-13.7451196,9.4708203],[-13.7450928,9.4709526],[-13.7450842,9.4710525],[-13.7451518,9.4711537],[-13.7455059,9.4714601],[-13.7455863,9.4716617],[-13.7455863,9.4719686],[-13.7455487,9.4727358],[-13.7454146,9.4729898],[-13.7451893,9.4731644],[-13.7450713,9.4733125],[-13.7450123,9.4734871],[-13.7450297,9.4736297],[-13.7451303,9.4736459],[-13.7454607,9.4735115],[-13.7455809,9.4735877],[-13.7458384,9.4739739],[-13.7459242,9.4742494],[-13.745994,9.4745],[-13.7460637,9.4746883],[-13.7462695,9.4749275],[-13.7464446,9.4751539],[-13.7465411,9.4754925],[-13.7467182,9.4760111],[-13.7468903,9.4765695],[-13.7468952,9.4768841],[-13.7467719,9.4772439],[-13.7465626,9.4774926],[-13.7464714,9.4775931],[-13.7463857,9.4776699],[-13.7452188,9.4775561],[-13.7442291,9.4774688],[-13.7441848,9.477482],[-13.744166,9.4775138],[-13.7441514,9.4776011],[-13.7441727,9.4776672],[-13.7443405,9.4777293],[-13.7443338,9.4778074],[-13.7444672,9.477818],[-13.7444773,9.4777393],[-13.74643,9.477947],[-13.7465411,9.4780085],[-13.7466238,9.4780901],[-13.746745,9.478191],[-13.7470588,9.4782598],[-13.7473083,9.4782096],[-13.7475818,9.4784106],[-13.7477884,9.4785032],[-13.7479278,9.478527],[-13.7482427,9.478731],[-13.747951,9.4791278],[-13.7480278,9.4791755],[-13.7483365,9.4788033],[-13.7483891,9.478766],[-13.7486842,9.4788895],[-13.7488506,9.4789583],[-13.749041,9.4791302],[-13.7493011,9.479572],[-13.7497196,9.4799953],[-13.7502694,9.4806303],[-13.7506637,9.4810509],[-13.7509802,9.4814173],[-13.7513544,9.4817379],[-13.7513765,9.4817569],[-13.751404,9.4817804],[-13.7514932,9.4818419],[-13.7515783,9.4818856],[-13.7516145,9.4819021],[-13.7516467,9.4819094],[-13.7517084,9.481912],[-13.751735,9.4819204],[-13.7517594,9.481928],[-13.7517654,9.4819299],[-13.752104,9.4821025],[-13.7523656,9.4821885],[-13.7524675,9.4822811],[-13.7525345,9.4824187],[-13.7525882,9.4825126],[-13.7526338,9.4825761],[-13.7526834,9.4826541],[-13.7527223,9.482756],[-13.7527461,9.4829033],[-13.7527853,9.4834108],[-13.7528631,9.4836198],[-13.752965,9.4837864],[-13.7533486,9.4842626],[-13.7536168,9.4848102],[-13.7537053,9.4853235],[-13.7537724,9.4858473],[-13.7538528,9.4860589],[-13.7540299,9.4863341],[-13.7543142,9.4868209],[-13.7544323,9.4872652],[-13.754463,9.487682],[-13.7547952,9.4893816],[-13.7548345,9.4897203],[-13.7549096,9.4902441],[-13.7549901,9.490805],[-13.7551223,9.4915599],[-13.7551832,9.4917627],[-13.7552825,9.4920775],[-13.7553602,9.4924425],[-13.755379,9.4926383],[-13.7553951,9.4928658],[-13.7553522,9.4930325],[-13.7552691,9.4931224],[-13.7551376,9.4932574],[-13.7551254,9.4933372],[-13.7551215,9.4934187],[-13.7554917,9.4941383],[-13.7556714,9.4944637],[-13.7557089,9.4945854],[-13.7557089,9.4947256],[-13.7556687,9.4947944],[-13.7553978,9.4948526],[-13.7553307,9.4949108],[-13.7553093,9.4949399],[-13.7554541,9.4956462],[-13.7555936,9.4959504],[-13.7556446,9.4959716],[-13.756012,9.4959981],[-13.7561086,9.4960245],[-13.7561622,9.4960827],[-13.75646,9.4973763],[-13.7567443,9.4982811],[-13.7568194,9.4992916],[-13.7568677,9.4996355],[-13.7569213,9.4999953],[-13.757062,9.500569],[-13.7574212,9.501829],[-13.7575704,9.5025402],[-13.7576777,9.5031222],[-13.7577099,9.5035084],[-13.757726,9.5036989],[-13.757844,9.5037201],[-13.7580156,9.5038999],[-13.7580371,9.5040375],[-13.7580317,9.504228],[-13.7581819,9.5043285],[-13.758772,9.5042597],[-13.7592655,9.5044237],[-13.7599998,9.5047164],[-13.760542,9.5050289],[-13.7606109,9.5053587],[-13.7607837,9.5058046],[-13.7608534,9.5061591],[-13.7608727,9.5062749],[-13.7608266,9.5063443],[-13.7606423,9.5065],[-13.7607139,9.5065929],[-13.76095,9.5066988],[-13.7610894,9.5068204],[-13.7611431,9.5068945],[-13.7610573,9.5069527],[-13.7608588,9.5068734],[-13.760671,9.5067622],[-13.7605637,9.5067781],[-13.7605063,9.5068481],[-13.7606013,9.5070532],[-13.7607032,9.5071326],[-13.760891,9.5071485],[-13.7610734,9.5071326],[-13.7611324,9.507249],[-13.7611029,9.5073575],[-13.7610036,9.5074236],[-13.7609875,9.5074818],[-13.7610331,9.5075241],[-13.7611806,9.5074606],[-13.7613067,9.5073752],[-13.7616339,9.5070744],[-13.7629429,9.5063125],[-13.7638946,9.5057313],[-13.7642343,9.505602],[-13.7645866,9.5055183],[-13.7648714,9.5053814],[-13.7650086,9.5053681],[-13.76525,9.5055569],[-13.7653795,9.5058113],[-13.7654507,9.5058205],[-13.7657511,9.5057967],[-13.7659738,9.5055851],[-13.7660998,9.5053549],[-13.7663011,9.5052676],[-13.7663536,9.5052743],[-13.7666094,9.5053073],[-13.766934,9.505548],[-13.767087,9.5056142],[-13.7672238,9.5055851],[-13.7674932,9.5054958],[-13.7677409,9.5054138],[-13.7679264,9.5053523],[-13.7679909,9.5052623],[-13.7680473,9.5051316],[-13.7679828,9.5049211],[-13.7678407,9.5048152],[-13.7676931,9.5047068],[-13.7676528,9.5046512],[-13.7675644,9.5044766],[-13.7675564,9.504347],[-13.7676153,9.504101],[-13.7677736,9.5036037],[-13.767921,9.5030587],[-13.7683904,9.5022042],[-13.7685246,9.5019759],[-13.7687445,9.5016011],[-13.7687982,9.5012704],[-13.7689001,9.5009106],[-13.7689752,9.5005879],[-13.7689967,9.5005059],[-13.7690047,9.5004662],[-13.7690611,9.5004133],[-13.7691094,9.5004106],[-13.7692166,9.5003815],[-13.7692944,9.5003366],[-13.7693347,9.500289],[-13.7693534,9.5002202],[-13.7693453,9.5001223],[-13.7693266,9.4999133],[-13.7693293,9.4997969],[-13.7693426,9.4996964],[-13.7694044,9.4995641],[-13.7694258,9.4995006],[-13.7694178,9.4993207],[-13.7694014,9.4992629],[-13.7693719,9.4991594],[-13.7693347,9.4990324],[-13.7693042,9.4987463],[-13.7693222,9.4985597],[-13.7693323,9.4983744],[-13.7693408,9.4982161],[-13.7694017,9.4979689],[-13.7694178,9.497879],[-13.7693843,9.4978022],[-13.7692864,9.4976726],[-13.769104,9.4975615],[-13.7686395,9.4973646],[-13.7681786,9.4973631],[-13.7679986,9.497325],[-13.7678971,9.4973035],[-13.7677038,9.4972626],[-13.7674057,9.4971833],[-13.7671969,9.4971277],[-13.7668756,9.4970129],[-13.7667086,9.4969088],[-13.7664923,9.4967637],[-13.766333,9.4966648],[-13.7662439,9.4966096],[-13.7660971,9.4964875],[-13.765827,9.4962678],[-13.7654427,9.4959028],[-13.765263,9.4957732],[-13.7650938,9.4956533],[-13.7648434,9.4955057],[-13.7646358,9.4953365],[-13.7642062,9.4950616],[-13.7640613,9.4949637],[-13.7639455,9.4948468],[-13.7637931,9.4947388],[-13.7636349,9.494633],[-13.7635356,9.4945616],[-13.7634257,9.4944372],[-13.7632164,9.4942812],[-13.7628758,9.4940484],[-13.762613,9.4938499],[-13.7625379,9.4937309],[-13.7624976,9.493588],[-13.7624413,9.4933552],[-13.762216,9.4930642],[-13.7619638,9.4929108],[-13.7616232,9.4927521],[-13.7614113,9.4926171],[-13.7611511,9.4924637],[-13.7608749,9.4922812],[-13.760612,9.4920299],[-13.7604082,9.4918685],[-13.7601587,9.4914293],[-13.7600814,9.4912052],[-13.7600273,9.4910484],[-13.7598556,9.4907494],[-13.7597376,9.4906542],[-13.759566,9.490551],[-13.7593997,9.4903949],[-13.7592656,9.4902071],[-13.7592549,9.4900924],[-13.7592469,9.490006],[-13.7594132,9.489842],[-13.7594829,9.4897812],[-13.7594856,9.489715],[-13.75944,9.489678],[-13.759301,9.4895806],[-13.7592387,9.4895008],[-13.759153,9.4893896],[-13.7590309,9.4892785],[-13.7589839,9.4892468],[-13.7589585,9.4892428],[-13.7589196,9.4892481],[-13.7588003,9.489301],[-13.7587237,9.4892931],[-13.7586004,9.4892362],[-13.7584662,9.4891304],[-13.7583531,9.4889637],[-13.7582758,9.48885],[-13.7581632,9.4886859],[-13.7580317,9.4884452],[-13.7578627,9.488223],[-13.7576777,9.4879399],[-13.7576392,9.4877981],[-13.7576039,9.4876682],[-13.75758,9.4875801],[-13.7575819,9.487508],[-13.7576107,9.4873658],[-13.7576322,9.487223],[-13.7576724,9.4870537],[-13.7577394,9.4870087],[-13.7578682,9.4869981],[-13.7581284,9.4869769],[-13.7581873,9.4868738],[-13.7582083,9.4866459],[-13.7578815,9.4864293],[-13.7578064,9.4862441],[-13.7578815,9.4861224],[-13.7579254,9.4859585],[-13.7577291,9.4857994],[-13.7575597,9.4856066],[-13.7574899,9.4854214],[-13.7573934,9.4848367],[-13.7574738,9.4844848],[-13.7575794,9.4842048],[-13.7577903,9.4839399],[-13.7578252,9.4838817],[-13.7577957,9.4837891],[-13.7576884,9.4835377],[-13.7574658,9.4832996],[-13.7570393,9.482998],[-13.7569145,9.4828525],[-13.7567523,9.4824504],[-13.7564783,9.4821252],[-13.7564144,9.4820747],[-13.7563124,9.4820642],[-13.7561917,9.4820747],[-13.7560657,9.4820033],[-13.7558752,9.4817652],[-13.7557796,9.4816641],[-13.7555882,9.4815589],[-13.755493,9.4814737],[-13.7553614,9.4812597],[-13.7552158,9.4810167],[-13.7550893,9.4809186],[-13.7549874,9.4809001],[-13.7548292,9.4809504],[-13.7547675,9.4809001],[-13.7547487,9.480834],[-13.7546816,9.4805112],[-13.7546253,9.4801064],[-13.7546414,9.4799556],[-13.7546951,9.4798181],[-13.7546977,9.4797122],[-13.7546441,9.4796937],[-13.7545878,9.4797096],[-13.7544644,9.4798472],[-13.7543142,9.4798921],[-13.7540942,9.4798578],[-13.7539279,9.4797705],[-13.7537724,9.4796408],[-13.7537,9.4795509],[-13.7536785,9.4794186],[-13.7536436,9.479154],[-13.7535551,9.4789847],[-13.7531367,9.4785032],[-13.7529302,9.4782651],[-13.7527397,9.47799],[-13.7526888,9.477863],[-13.752678,9.4777968],[-13.7526888,9.4777466],[-13.7527183,9.4777016],[-13.7528121,9.4776381],[-13.7529489,9.4775243],[-13.7530482,9.4774132],[-13.7532091,9.4771672],[-13.7532815,9.4770772],[-13.7533164,9.4769926],[-13.7532923,9.476945],[-13.7530455,9.4765296],[-13.7528148,9.4762306],[-13.7527156,9.4758814],[-13.7527095,9.4756614],[-13.7527344,9.4755983],[-13.7528309,9.4754158],[-13.7528551,9.4753629],[-13.7528738,9.475265],[-13.7527478,9.4747465],[-13.7527263,9.4746327],[-13.7527049,9.4745718],[-13.7526405,9.4745586],[-13.7524554,9.4745586],[-13.7522677,9.4745295],[-13.7521362,9.4745004],[-13.7519913,9.4744335],[-13.7517339,9.4742729],[-13.751353,9.4739475],[-13.7510392,9.4736644],[-13.7507281,9.4732517],[-13.7503418,9.4727305],[-13.7502399,9.4725585],[-13.7501501,9.4723746],[-13.7500066,9.4718839],[-13.7497813,9.4712727],[-13.7496766,9.470942],[-13.7497008,9.470823],[-13.7497276,9.4707516],[-13.7497727,9.4707166],[-13.7498832,9.4707436],[-13.7500387,9.4706881],[-13.7501085,9.4705796],[-13.7501407,9.4704764],[-13.7500923,9.4703508],[-13.7498993,9.4701457],[-13.7497491,9.4698547],[-13.7496445,9.469643],[-13.7496176,9.4695002],[-13.749631,9.4688493],[-13.74965,9.468328],[-13.7498349,9.466619],[-13.7500656,9.4658042],[-13.7500027,9.4654764],[-13.749851,9.4651586],[-13.7498188,9.4649999],[-13.7497759,9.4648464],[-13.7497947,9.4645686],[-13.7499288,9.4643622],[-13.7500602,9.4641956],[-13.7502533,9.4638675],[-13.7503821,9.4635818],[-13.7504304,9.4629521],[-13.7507469,9.4624229],[-13.7510526,9.4620843],[-13.7511545,9.4618144],[-13.7511545,9.4613435],[-13.7510258,9.4609043],[-13.751058,9.4605762],[-13.751235,9.4603328],[-13.7515086,9.4598407],[-13.7517768,9.4596449],[-13.7520182,9.4593804],[-13.7522757,9.4589094],[-13.752442,9.4582956],[-13.7523079,9.45765],[-13.7521639,9.4574038],[-13.7519978,9.4572405],[-13.7518626,9.45706],[-13.7518139,9.4569711],[-13.7516921,9.4561837],[-13.7516105,9.4558959],[-13.7514679,9.4556122],[-13.7513178,9.455362],[-13.751176,9.4551207],[-13.7511277,9.4550096],[-13.7511197,9.4548879],[-13.7511009,9.454745],[-13.7510365,9.4545571],[-13.7509696,9.4544539],[-13.7508675,9.4543481],[-13.7507656,9.4542026],[-13.7506154,9.4538348],[-13.7504599,9.4533745],[-13.7502453,9.4526072],[-13.7501782,9.4520542],[-13.7502399,9.4514378],[-13.7502828,9.4510435],[-13.7503123,9.4508239],[-13.7505752,9.4504959],[-13.7507361,9.4502842],[-13.7509507,9.4500831],[-13.7512189,9.4498503],[-13.7514764,9.4496492],[-13.7516212,9.449427],[-13.75164,9.4492232],[-13.7516668,9.4490856],[-13.7517044,9.4490301],[-13.7518171,9.4488899],[-13.7521738,9.448665],[-13.7525734,9.4484401],[-13.7527746,9.4481649],[-13.7531528,9.4479665],[-13.7536544,9.4477786],[-13.7538824,9.4476119],[-13.754105,9.4474029],[-13.754282,9.4472627],[-13.7546387,9.4470404],[-13.755092,9.4467811],[-13.755261,9.4466435],[-13.755489,9.4463419],[-13.7555963,9.4462202],[-13.7557706,9.4459398],[-13.7558538,9.4457942],[-13.7558467,9.4457321],[-13.7557867,9.4456646],[-13.755607,9.4455826],[-13.75543,9.4455164],[-13.7552878,9.4455455],[-13.755143,9.4455984],[-13.7549257,9.4455482],[-13.7547889,9.4453947],[-13.7547782,9.4453444],[-13.7548345,9.4452148],[-13.7548935,9.4451142],[-13.7548962,9.4450613],[-13.7548667,9.4450455],[-13.754805,9.4450428],[-13.7545261,9.4452016],[-13.7544887,9.445201],[-13.754341,9.4450931],[-13.7542927,9.4450455],[-13.7542981,9.4449608],[-13.7544644,9.4446856],[-13.7547943,9.4444237],[-13.7550912,9.4442044],[-13.7552208,9.4440586],[-13.7552932,9.4438495],[-13.7553147,9.443577],[-13.7552825,9.4433997],[-13.7551591,9.4431643],[-13.7550277,9.4430515],[-13.7548721,9.4430637],[-13.7546253,9.4430955],[-13.7544724,9.4433151],[-13.75429,9.4435823],[-13.7542096,9.4435955],[-13.7541023,9.4435955],[-13.7539762,9.443495],[-13.7539467,9.4434024],[-13.7539119,9.4432833],[-13.7538797,9.4431643],[-13.7537455,9.4430374],[-13.75359,9.4430505],[-13.7534827,9.4430134],[-13.7534237,9.4429632],[-13.7534103,9.4428997],[-13.7534291,9.4428124],[-13.7535498,9.4424552],[-13.7535874,9.4423361],[-13.7535819,9.4422752],[-13.7534907,9.4419075],[-13.7534103,9.441627],[-13.7534049,9.4415],[-13.7533996,9.4413809],[-13.7534183,9.4412883],[-13.753405,9.4411957],[-13.7533352,9.4411772],[-13.7529678,9.4412063],[-13.7524582,9.4413254],[-13.7519486,9.4416746],[-13.751337,9.4423414],[-13.7512083,9.4425425],[-13.7506611,9.4430875],[-13.7503929,9.4434315],[-13.7500228,9.443786],[-13.7497572,9.4439554],[-13.7495748,9.4440321],[-13.7491752,9.4442173],[-13.749033,9.4443443],[-13.7489526,9.4444078],[-13.7487889,9.4445216],[-13.7481183,9.4450332],[-13.7480941,9.4451063],[-13.748113,9.4452016],[-13.7482149,9.4453206],[-13.7484401,9.4454238],[-13.7485019,9.4454873],[-13.7485018,9.4455667],[-13.7482525,9.4457836],[-13.7479358,9.4461576],[-13.7477287,9.4465872],[-13.7477508,9.4467732],[-13.7478797,9.4469075],[-13.7481505,9.4471833],[-13.7482847,9.4473024],[-13.7484187,9.4474955],[-13.7484615,9.4478015],[-13.7484133,9.4479612],[-13.7482372,9.4480915],[-13.7478876,9.448239],[-13.7474612,9.4483078],[-13.7471849,9.448493],[-13.7469411,9.4487506],[-13.7466785,9.4492293],[-13.7464277,9.4497584],[-13.7462677,9.4501387],[-13.7459887,9.4505541],[-13.745868,9.4507499],[-13.7458117,9.4508583],[-13.7457419,9.4510197],[-13.7457768,9.4512235],[-13.7458625,9.4513954],[-13.7461377,9.4515901],[-13.7462649,9.4517579],[-13.7463341,9.45208],[-13.7464178,9.4526337],[-13.7463803,9.4528533],[-13.7462811,9.4530173],[-13.7460906,9.4531522],[-13.7458439,9.4533904],[-13.7457929,9.4535676],[-13.74575,9.4540148],[-13.7457795,9.4542185]]],[[[-13.7212869,9.5072364],[-13.7211461,9.507122],[-13.721004,9.5070175],[-13.7209785,9.5069924],[-13.7209114,9.5069766],[-13.7208175,9.5069884],[-13.7207853,9.5069963],[-13.7207625,9.5070056],[-13.7207263,9.5069751],[-13.7206727,9.5069514],[-13.7206244,9.5069236],[-13.7205641,9.5068958],[-13.7205426,9.5068826],[-13.7205272,9.5068727],[-13.720485,9.5068535],[-13.7204353,9.5068218],[-13.720379,9.506794],[-13.7203266,9.5067742],[-13.7202774,9.5067579],[-13.7196761,9.5063892],[-13.7195876,9.5062147],[-13.719424,9.5059448],[-13.7192658,9.5057702],[-13.7190834,9.5056327],[-13.7189493,9.5054819],[-13.7188715,9.5052253],[-13.7188849,9.5050427],[-13.7188956,9.5048814],[-13.7189171,9.5047491],[-13.7189198,9.5045586],[-13.7188983,9.504384],[-13.7187937,9.5043206],[-13.7186837,9.5042915],[-13.7185792,9.504376],[-13.7184953,9.5043883],[-13.7184397,9.5043681],[-13.7181237,9.5041983],[-13.7180428,9.5041882],[-13.7179139,9.504228],[-13.7175963,9.5044964],[-13.7172623,9.5047596],[-13.7171712,9.5048633],[-13.7169416,9.504765],[-13.7168769,9.5047464],[-13.7164038,9.5045666],[-13.7160552,9.5043629],[-13.7157661,9.5042245],[-13.7155831,9.504084],[-13.7155628,9.5040703],[-13.7154342,9.5040345],[-13.7153122,9.5040101],[-13.7150651,9.5040595],[-13.7149088,9.5042326],[-13.714777,9.5042392],[-13.7146618,9.5042065],[-13.7145546,9.5041187],[-13.7144525,9.5039303],[-13.7143995,9.5037922],[-13.7143848,9.5035743],[-13.714425,9.5034567],[-13.7145632,9.5033585],[-13.7154833,9.5026574],[-13.7161689,9.5021351],[-13.7161048,9.5020441],[-13.7154133,9.5025641],[-13.7150306,9.5020561],[-13.7149019,9.5020429],[-13.7147758,9.5020984],[-13.7145291,9.502281],[-13.7143306,9.5024688],[-13.7141187,9.5026301],[-13.7140356,9.5026089],[-13.7139925,9.5025085],[-13.7139764,9.5023861],[-13.7139605,9.5022888],[-13.7140409,9.502138],[-13.7141454,9.5020085],[-13.7142957,9.5018153],[-13.7144619,9.5016725],[-13.7146444,9.501601],[-13.7147544,9.5015719],[-13.7149286,9.5016117],[-13.714969,9.5015719],[-13.7150037,9.50149],[-13.7150466,9.5013101],[-13.7150786,9.5010947],[-13.7151262,9.5008636],[-13.7151557,9.5006957],[-13.7150968,9.5005998],[-13.714973,9.5005678],[-13.714861,9.5005881],[-13.7147023,9.5007847],[-13.7144437,9.5007944],[-13.7143617,9.5008501],[-13.7143112,9.5009475],[-13.7142367,9.5009767],[-13.7141053,9.5009635],[-13.7139376,9.5009692],[-13.7137615,9.5010331],[-13.7136976,9.5010985],[-13.7136948,9.5012149],[-13.7137995,9.5012704],[-13.7137942,9.5012994],[-13.7137647,9.5013523],[-13.7136814,9.5014847],[-13.7133355,9.5020639],[-13.713319,9.5021228],[-13.7133167,9.502183],[-13.7133811,9.5022412],[-13.7133971,9.5022862],[-13.713416,9.5023496],[-13.713322,9.502619],[-13.7132121,9.5026935],[-13.7129439,9.5027359],[-13.7128177,9.5027465],[-13.7124718,9.5029951],[-13.7119079,9.5033413],[-13.7115692,9.5034621],[-13.7112162,9.5034858],[-13.7109129,9.5034393],[-13.7099842,9.5032915],[-13.7098663,9.5032651],[-13.709642,9.5031751],[-13.7095911,9.5031776],[-13.7095563,9.5031975],[-13.7093926,9.5033628],[-13.7093041,9.5034382],[-13.7092612,9.5034516],[-13.7088282,9.5033894],[-13.7087789,9.5033822],[-13.7082204,9.5033021],[-13.7080784,9.5033575],[-13.7079523,9.5034369],[-13.7078396,9.503519],[-13.7075928,9.5036777],[-13.7073933,9.5038757],[-13.7071667,9.5041045],[-13.7067748,9.5041908],[-13.7067222,9.5042103],[-13.706638,9.5042808],[-13.7065681,9.5044872],[-13.7062705,9.5046645],[-13.7057421,9.5047094],[-13.7056081,9.5048469],[-13.7055833,9.5049167],[-13.7055194,9.5050692],[-13.7054042,9.5052569],[-13.7053236,9.5053073],[-13.7045887,9.5055665],[-13.7041623,9.5059315],[-13.7040228,9.5060401],[-13.7036017,9.5064104],[-13.7035454,9.5065655],[-13.7034971,9.5068575],[-13.7034505,9.5069605],[-13.7030255,9.507208],[-13.7029902,9.5072674],[-13.7029761,9.5073497],[-13.7032382,9.5078444],[-13.7033603,9.5079183],[-13.7034247,9.5080452],[-13.7034407,9.5081299],[-13.7034515,9.5084183],[-13.7036097,9.5089235],[-13.7035642,9.5092329],[-13.7034515,9.5093388],[-13.7032825,9.5094737],[-13.7028077,9.5096642],[-13.7026951,9.5096854],[-13.7025958,9.5096616],[-13.7024966,9.5095822],[-13.702394,9.5095182],[-13.7021908,9.5094605],[-13.7020622,9.5094631],[-13.7020085,9.509487],[-13.7019923,9.5095518],[-13.7020487,9.5100253],[-13.7020324,9.5101347],[-13.7019732,9.5102324],[-13.7017349,9.5104656],[-13.7017214,9.5105604],[-13.7017934,9.5107767],[-13.7014444,9.5108889],[-13.7007212,9.5111773],[-13.7003018,9.5112887],[-13.699952,9.5113564],[-13.6997098,9.511389],[-13.699514,9.5114048],[-13.6989802,9.5114789],[-13.6983393,9.5115054],[-13.6973495,9.5115424],[-13.6970303,9.5115556],[-13.6967379,9.5115318],[-13.6964161,9.511537],[-13.6963302,9.5115556],[-13.6962981,9.5116349],[-13.6962941,9.5117694],[-13.6963046,9.5120129],[-13.6963404,9.5122225],[-13.6963946,9.5124021],[-13.696548,9.5127022],[-13.6967869,9.5130871],[-13.6969062,9.5132406],[-13.6969632,9.5133333],[-13.6970437,9.5138624],[-13.6971885,9.5140951],[-13.6973548,9.5142909],[-13.6973442,9.514386],[-13.6972207,9.5146189],[-13.6968721,9.5150792],[-13.6967272,9.5152961],[-13.6965931,9.5155977],[-13.6964141,9.515912],[-13.6959761,9.5165553],[-13.6955363,9.5171478],[-13.6953001,9.517292],[-13.6950386,9.517349],[-13.6946096,9.5173079],[-13.6942676,9.517333],[-13.6938804,9.5174461],[-13.6933047,9.5180102],[-13.6922808,9.5193587],[-13.6919962,9.5196518],[-13.6917635,9.5198243],[-13.691553,9.519908],[-13.6912456,9.5199784],[-13.6901945,9.5200169],[-13.689921,9.5200722],[-13.6896035,9.5202212],[-13.6892588,9.5204842],[-13.6884978,9.5214327],[-13.687799,9.5209424],[-13.6874172,9.521367],[-13.6861941,9.5230309],[-13.6857864,9.5233959],[-13.6856497,9.5232596],[-13.6856309,9.5232544],[-13.6856095,9.5232649],[-13.6854538,9.5233906],[-13.6853533,9.5234515],[-13.6850099,9.5236234],[-13.685075,9.5238154],[-13.6848785,9.5238999],[-13.6847913,9.523917],[-13.6847457,9.523925],[-13.6846679,9.5239276],[-13.6843918,9.5239434],[-13.6843528,9.5239422],[-13.6843381,9.5239117],[-13.6843005,9.5237741],[-13.6842777,9.5237557],[-13.6842388,9.5237741],[-13.6839116,9.5239263],[-13.6828576,9.5242793],[-13.6828306,9.5242953],[-13.6828281,9.5243256],[-13.6828588,9.5243852],[-13.6829071,9.5244924],[-13.682899,9.524524],[-13.6828052,9.5246087],[-13.6827019,9.5246929],[-13.6824068,9.5248402],[-13.682364,9.5247298],[-13.6823305,9.5246088],[-13.6823003,9.5245354],[-13.6821964,9.5243386],[-13.682086,9.5241518],[-13.6818489,9.5236333],[-13.6817885,9.5236345],[-13.681753,9.5235486],[-13.6817323,9.5235632],[-13.6817464,9.5236108],[-13.6817082,9.5236326],[-13.682256,9.5248832],[-13.6820927,9.5249516],[-13.6820803,9.5249574],[-13.6820589,9.5249698],[-13.6820321,9.5249748],[-13.6820167,9.5249658],[-13.6819523,9.5249049],[-13.6819267,9.5248931],[-13.6819013,9.5249036],[-13.6817282,9.5250347],[-13.6815983,9.5252158],[-13.6815727,9.5252317],[-13.681546,9.5252224],[-13.6814051,9.5251324],[-13.6813769,9.5251205],[-13.6813569,9.5251338],[-13.6811584,9.5254089],[-13.6811489,9.5254353],[-13.6811678,9.5254618],[-13.6813193,9.5255398],[-13.6813366,9.5255544],[-13.6813341,9.5255861],[-13.6812388,9.5257527],[-13.681232,9.5257793],[-13.6812563,9.5258017],[-13.6815607,9.5259801],[-13.6816236,9.5259248],[-13.6816907,9.5259592],[-13.6817309,9.5260227],[-13.6817068,9.5260703],[-13.6815968,9.5261999],[-13.6815351,9.5262925],[-13.6814386,9.5264194],[-13.6813286,9.5265332],[-13.6809918,9.5264373],[-13.6807895,9.5266866],[-13.6806151,9.526967],[-13.6805829,9.5270568],[-13.6805803,9.5271098],[-13.6806527,9.5272685],[-13.6806902,9.5273716],[-13.6806844,9.5274388],[-13.680535,9.5276548],[-13.6801037,9.5273734],[-13.6799955,9.5275357],[-13.6799365,9.527623],[-13.6798561,9.5277156],[-13.6797461,9.5278452],[-13.6796764,9.5279378],[-13.6797005,9.5279827],[-13.6798695,9.5281043],[-13.6796093,9.5285118],[-13.6794806,9.528689],[-13.6792982,9.5285673],[-13.6792177,9.5285118],[-13.6790916,9.5284086],[-13.6789421,9.5286312],[-13.6786813,9.5289535],[-13.6786893,9.5289825],[-13.6787108,9.5290037],[-13.6787752,9.5290752],[-13.6786813,9.5292788],[-13.6786652,9.5293053],[-13.6786438,9.5293107],[-13.6784989,9.5292418],[-13.678413,9.5292867],[-13.678338,9.5293186],[-13.6781448,9.5293847],[-13.6780135,9.5294535],[-13.6779463,9.5296941],[-13.6779276,9.5298052],[-13.6778417,9.5298766],[-13.6777157,9.5299348],[-13.6776546,9.5299152],[-13.6773053,9.529107],[-13.6771846,9.5291651],[-13.6770237,9.5292471],[-13.6768494,9.5293397],[-13.6770934,9.5297921],[-13.6771578,9.5298846],[-13.6771578,9.5299295],[-13.6770773,9.5300195],[-13.6768144,9.5302708],[-13.6766911,9.5304322],[-13.6766428,9.5307417],[-13.6765945,9.5309373],[-13.6765999,9.5309851],[-13.6766213,9.5310352],[-13.6766642,9.5310987],[-13.676675,9.5311279],[-13.6766669,9.5311595],[-13.6765301,9.5313474],[-13.6764604,9.5314665],[-13.6763424,9.5315748],[-13.6762646,9.5316145],[-13.6762217,9.5315933],[-13.6762056,9.5312072],[-13.6757952,9.5312495],[-13.6758381,9.5316331],[-13.6757335,9.5316806],[-13.6752507,9.5317284],[-13.6752508,9.5318924],[-13.6749932,9.5319028],[-13.674953,9.5319162],[-13.6749154,9.5319769],[-13.6748511,9.5322653],[-13.6746579,9.5326436],[-13.6746231,9.5327415],[-13.6745399,9.5328552],[-13.6744408,9.5329398],[-13.6742539,9.5330178],[-13.6733005,9.5329893],[-13.6729308,9.5331006],[-13.672861,9.5330391],[-13.6726812,9.5332282],[-13.6724922,9.5334436],[-13.6725578,9.5335641],[-13.6721326,9.5338498],[-13.6716659,9.5343696],[-13.6718041,9.5345322],[-13.6715198,9.5348946],[-13.6714393,9.5349846],[-13.6713375,9.535048],[-13.6712758,9.535093],[-13.671198,9.5351406],[-13.6711443,9.5351776],[-13.6709511,9.5352649],[-13.6708063,9.5353258],[-13.6706348,9.5354169],[-13.6704163,9.5355685],[-13.6703798,9.5356246],[-13.6703503,9.5357542],[-13.6702913,9.5358336],[-13.6699507,9.5360162],[-13.6694437,9.5363177],[-13.6691138,9.536368],[-13.6688841,9.5363974],[-13.6683413,9.5364473],[-13.6682878,9.5365399],[-13.6682609,9.5366906],[-13.6682314,9.5367991],[-13.6681724,9.5369023],[-13.6681134,9.537024],[-13.6679685,9.5371455],[-13.6678398,9.5371324],[-13.6676279,9.5362859],[-13.6675904,9.5362119],[-13.6675313,9.5362039],[-13.6672954,9.5362278],[-13.6670566,9.5362701],[-13.6668902,9.5356299],[-13.666716,9.53554],[-13.6655599,9.5358019],[-13.665745,9.5363837],[-13.6660802,9.5370424],[-13.6660963,9.5371402],[-13.6660534,9.537254],[-13.6659488,9.5373439],[-13.6656998,9.5377135],[-13.6656269,9.5378651],[-13.6655841,9.5379418],[-13.6654406,9.538109],[-13.6655437,9.5382416],[-13.6650879,9.5385687],[-13.6648947,9.5386056],[-13.664833,9.5386534],[-13.6648223,9.5387167],[-13.6648679,9.5387962],[-13.6648625,9.5388622],[-13.6648142,9.5389045],[-13.664625,9.539014],[-13.6643952,9.5390547],[-13.6641088,9.539111],[-13.6640337,9.5391532],[-13.6640069,9.5392325],[-13.663972,9.5393702],[-13.6638486,9.5395235],[-13.6636528,9.5396293],[-13.663398,9.5396716],[-13.6632344,9.5396426],[-13.6631271,9.5396372],[-13.6630493,9.5396452],[-13.6629608,9.5396796],[-13.6629045,9.5396716],[-13.6628589,9.5395896],[-13.6626979,9.5393521],[-13.6622759,9.5396852],[-13.6626336,9.5399864],[-13.6624163,9.5401702],[-13.6623372,9.5402469],[-13.6622103,9.5403543],[-13.6621232,9.5404991],[-13.6622527,9.5405817],[-13.6622474,9.5406397],[-13.6621562,9.5409651],[-13.6621159,9.5411264],[-13.6620167,9.5413619],[-13.6619899,9.5414756],[-13.6619657,9.5415682],[-13.6618638,9.541748],[-13.6617565,9.5418459],[-13.6616521,9.5419274],[-13.6615634,9.5419438],[-13.6614829,9.5421236],[-13.6614856,9.542166],[-13.661499,9.5422056],[-13.6615902,9.5422427],[-13.6615312,9.5424015],[-13.6614534,9.5423855],[-13.6613622,9.5425892],[-13.6613891,9.5426209],[-13.6614534,9.54265],[-13.6613005,9.5428168],[-13.6612871,9.542851],[-13.6613113,9.5429039],[-13.6613596,9.5429727],[-13.6613381,9.5431341],[-13.6612764,9.5432134],[-13.6612174,9.5432293],[-13.6611078,9.5432445],[-13.6608675,9.543363],[-13.6607131,9.5434463],[-13.6606005,9.5435495],[-13.6604959,9.5436976],[-13.6602855,9.5440497],[-13.6601606,9.5442292],[-13.6599112,9.5444249],[-13.659651,9.5445518],[-13.659423,9.5446445],[-13.6592513,9.5446763],[-13.6586827,9.5447344],[-13.6584038,9.5447767],[-13.6583421,9.544782],[-13.6582992,9.544774],[-13.6581647,9.544505],[-13.65805,9.5445376],[-13.657988,9.5446285],[-13.6579761,9.5447388],[-13.6581212,9.5450324],[-13.6581355,9.5451364],[-13.6581258,9.545265],[-13.6580765,9.5453136],[-13.6578634,9.5454198],[-13.6572111,9.5454875],[-13.6570577,9.5453907],[-13.6568719,9.5452757],[-13.65639,9.5453279],[-13.6561883,9.5453797],[-13.6560005,9.545438],[-13.6558288,9.5455147],[-13.6556813,9.5456152],[-13.6555553,9.5457396],[-13.6554602,9.5459107],[-13.6553809,9.5461205],[-13.6550993,9.5466309],[-13.6550456,9.5466786],[-13.6543375,9.5470753],[-13.6540371,9.5472949],[-13.6538494,9.5473531],[-13.6537179,9.5473663],[-13.6535758,9.5473636],[-13.6533505,9.5472974],[-13.6532217,9.5472182],[-13.6529401,9.5468981],[-13.6528543,9.5468637],[-13.6527336,9.5468954],[-13.6527014,9.5470885],[-13.6526739,9.5471379],[-13.6526182,9.5471546],[-13.6523286,9.5470567],[-13.6520711,9.5469747],[-13.6519894,9.5469698],[-13.6519074,9.5470276],[-13.651666,9.5472314],[-13.6514837,9.5473478],[-13.6513415,9.5474217],[-13.651033,9.5474852],[-13.6508775,9.5475064],[-13.6507461,9.5475726],[-13.6506173,9.5476229],[-13.6504,9.5476678],[-13.6500621,9.5476493],[-13.64981,9.547652],[-13.6496517,9.5475382],[-13.6494398,9.5473345],[-13.6492977,9.5472234],[-13.6491823,9.5472339],[-13.6490992,9.5473001],[-13.6490455,9.5474139],[-13.6488873,9.547734],[-13.6487237,9.5478636],[-13.6485145,9.5479958],[-13.6483938,9.5480699],[-13.6482543,9.5481306],[-13.6481228,9.5482154],[-13.6480022,9.5482735],[-13.6478734,9.5483131],[-13.6476776,9.5483211],[-13.6475355,9.548328],[-13.6473852,9.5483237],[-13.6472833,9.5483078],[-13.6471787,9.5483025],[-13.6470902,9.5483238],[-13.6460483,9.5488271],[-13.6460227,9.5489268],[-13.6459824,9.5494453],[-13.6459342,9.5494981],[-13.6457045,9.5495674],[-13.6456499,9.5495854],[-13.6452475,9.5500192],[-13.6451671,9.5500616],[-13.6446284,9.5502613],[-13.6445555,9.5503445],[-13.6444886,9.5504874],[-13.6444295,9.5506435],[-13.644384,9.5507255],[-13.6443544,9.5507996],[-13.644341,9.5508525],[-13.6443195,9.5509106],[-13.6441961,9.5511354],[-13.644121,9.5511989],[-13.6440298,9.5512651],[-13.6438447,9.5512757],[-13.6436462,9.5512545],[-13.6434908,9.5511963],[-13.6433633,9.5511525],[-13.6432654,9.5511565],[-13.6431957,9.5511884],[-13.6431314,9.5512783],[-13.6430267,9.5513815],[-13.6429194,9.5515111],[-13.6429636,9.5516154],[-13.6429596,9.5516698],[-13.6428843,9.5517252],[-13.6427594,9.5519251],[-13.642737,9.5519898],[-13.6427316,9.5520474],[-13.6426887,9.552323],[-13.6426431,9.5523733],[-13.6423327,9.5526114],[-13.6422268,9.5526664],[-13.6421618,9.5526998],[-13.6420995,9.5527324],[-13.6420196,9.5527739],[-13.6418358,9.5528917],[-13.6414589,9.5532171],[-13.6414818,9.5532634],[-13.6415261,9.5532897],[-13.6416493,9.5533849],[-13.641652,9.5534141],[-13.6416265,9.5534855],[-13.6414898,9.5536297],[-13.6411679,9.5538491],[-13.6411391,9.5538691],[-13.64105,9.5539471],[-13.6409615,9.5539709],[-13.6406181,9.5540159],[-13.6405457,9.5540344],[-13.6402453,9.5540476],[-13.6399798,9.5540556],[-13.6395318,9.5541111],[-13.6394541,9.5541508],[-13.6392246,9.5542604],[-13.6389068,9.5543333],[-13.638758,9.5543662],[-13.638196,9.5545449],[-13.638086,9.5545899],[-13.6379868,9.55464],[-13.6378956,9.5546824],[-13.6377963,9.5547301],[-13.6375658,9.5548041],[-13.6374584,9.5548226],[-13.6373914,9.5548438],[-13.6372063,9.5548888],[-13.6365438,9.5550923],[-13.6364902,9.5551797],[-13.6364982,9.5552775],[-13.6366485,9.5554045],[-13.6371633,9.5556769],[-13.637276,9.555751],[-13.6372894,9.5559202],[-13.6372439,9.5561531],[-13.6370347,9.5566265],[-13.6366619,9.557629],[-13.6366349,9.5577056],[-13.6366484,9.5577743],[-13.6369139,9.5583669],[-13.6369675,9.5584965],[-13.6370078,9.5588324],[-13.6369166,9.5591101],[-13.6368522,9.559356],[-13.6368254,9.5595359],[-13.6367932,9.5598454],[-13.6368024,9.5599556],[-13.6374739,9.560188],[-13.6375268,9.5603404],[-13.6374664,9.5604723],[-13.6372197,9.5606097],[-13.6370775,9.5606759],[-13.6370131,9.5606944],[-13.6369514,9.5606785],[-13.6368066,9.5605992],[-13.636643,9.5605753],[-13.6365062,9.5605304],[-13.6363882,9.5604563],[-13.6363238,9.5603505],[-13.6362648,9.5602844],[-13.6362138,9.5602738],[-13.6361575,9.5602844],[-13.6360636,9.5603664],[-13.6359054,9.5604457],[-13.6358061,9.5605331],[-13.635664,9.5606522],[-13.6353153,9.5608002],[-13.6352668,9.5608426],[-13.6352053,9.5609218],[-13.6350793,9.5610172],[-13.6345348,9.5611997],[-13.6343497,9.5612288],[-13.6339742,9.5612288],[-13.6336041,9.5611362],[-13.6332822,9.5610489],[-13.6331534,9.5609742],[-13.632957,9.5609301],[-13.6327858,9.5608122],[-13.6323704,9.5604506],[-13.6321235,9.5601099],[-13.6315821,9.5598595],[-13.6313403,9.5597687],[-13.6312142,9.5596973],[-13.6307594,9.5595347],[-13.6306831,9.5594963],[-13.6305693,9.5594701],[-13.6302325,9.5594355],[-13.62979,9.5594513],[-13.6297497,9.5594778],[-13.6297256,9.5596205],[-13.6296666,9.5596972],[-13.6295459,9.5597793],[-13.6294909,9.5597952],[-13.6294305,9.5598238],[-13.6293662,9.5598573],[-13.6293273,9.5598798],[-13.629275,9.5598759],[-13.6291932,9.5598678],[-13.629173,9.5598296],[-13.6291516,9.5595783],[-13.6287761,9.5594804],[-13.6286768,9.5594646],[-13.6284354,9.5594249],[-13.6283013,9.5593958],[-13.6278319,9.5593217],[-13.6275154,9.5591604],[-13.627266,9.5589222],[-13.627148,9.5589118],[-13.6269709,9.5589567],[-13.6268583,9.559007],[-13.6263755,9.5592741],[-13.6258847,9.5595995],[-13.6256352,9.5596709],[-13.6254931,9.5597132],[-13.625418,9.5597264],[-13.6253589,9.5597238],[-13.6252651,9.5597344],[-13.6250559,9.5597607],[-13.6248601,9.559864],[-13.6247769,9.5599089],[-13.624506,9.5600465],[-13.6243597,9.5601528],[-13.6242006,9.5602827],[-13.6241949,9.5604908],[-13.6241922,9.5608558],[-13.6242914,9.5608796],[-13.6243263,9.5609114],[-13.6243612,9.5611282],[-13.6246482,9.5614086],[-13.6247152,9.5615356],[-13.6247689,9.5616705],[-13.6247984,9.5619138],[-13.624742,9.5622841],[-13.6246857,9.5625089],[-13.6245114,9.5628422],[-13.6243236,9.5630987],[-13.6242887,9.5631437],[-13.6242633,9.5631781],[-13.6242178,9.5632244],[-13.6241546,9.5632482],[-13.6240608,9.5632177],[-13.6239293,9.5631728],[-13.6238113,9.563133],[-13.6236826,9.5631119],[-13.623476,9.5631675],[-13.6233741,9.5631913],[-13.6233057,9.5632025],[-13.6231032,9.5631992],[-13.6229181,9.5631781],[-13.6227813,9.5631675],[-13.6226821,9.5631384],[-13.6225855,9.5631489],[-13.6225158,9.5631754],[-13.6223415,9.563313],[-13.6222583,9.5633606],[-13.6220223,9.5634426],[-13.621923,9.5634822],[-13.6218506,9.5635166],[-13.6218131,9.563514],[-13.621738,9.5635378],[-13.6216763,9.5635775],[-13.6216092,9.5636515],[-13.62151,9.5637547],[-13.621349,9.5638816],[-13.6212203,9.5639583],[-13.621003,9.5640985],[-13.6208126,9.5641831],[-13.6204478,9.5642308],[-13.6202663,9.5642221],[-13.6200482,9.5641699],[-13.6199595,9.5641462],[-13.6197987,9.5640562],[-13.6197209,9.5640006],[-13.6196566,9.5639557],[-13.6195546,9.5639028],[-13.6192463,9.5637361],[-13.6189914,9.5636542],[-13.6188063,9.5637044],[-13.6185998,9.5638049],[-13.6184469,9.5639557],[-13.6183772,9.5640906],[-13.6182296,9.5642969],[-13.6178944,9.5645058],[-13.6176342,9.5646539],[-13.6172292,9.5649475],[-13.6169878,9.5651142],[-13.6169046,9.5652173],[-13.6168081,9.5653416],[-13.6167383,9.5654686],[-13.6166927,9.5657172],[-13.6166176,9.5658918],[-13.6165184,9.5659685],[-13.6163306,9.5660478],[-13.6159632,9.5660875],[-13.6156896,9.5660796],[-13.6154938,9.5660055],[-13.6153168,9.5659076],[-13.6151505,9.565823],[-13.6150619,9.5657595],[-13.6149466,9.5657172],[-13.6148393,9.5657066],[-13.6147481,9.5657489],[-13.6145255,9.565942],[-13.6143807,9.5660267],[-13.6143136,9.566069],[-13.6141795,9.5661748],[-13.614099,9.5662435],[-13.6139381,9.5665001],[-13.61393,9.5665662],[-13.613973,9.5667434],[-13.6139783,9.5668783],[-13.6139756,9.5671349],[-13.6139944,9.567357],[-13.6140186,9.5673941],[-13.6140642,9.567447],[-13.6140776,9.5675448],[-13.6140132,9.5677326],[-13.6139569,9.5677935],[-13.6139703,9.5679521],[-13.6139461,9.568005],[-13.6138523,9.5680685],[-13.6137638,9.5681373],[-13.6136994,9.5681849],[-13.6136296,9.5682166],[-13.6135277,9.5682801],[-13.6133695,9.5683753],[-13.6132679,9.5684276],[-13.6130744,9.5687615],[-13.6130342,9.5688382],[-13.6128813,9.5691318],[-13.6128867,9.5692191],[-13.6129162,9.5693275],[-13.6129966,9.569666],[-13.6130771,9.5702162],[-13.6130664,9.5703511],[-13.6129832,9.570441],[-13.6128598,9.5704793],[-13.6127217,9.5705732],[-13.6127016,9.5706169],[-13.6126989,9.5706605],[-13.612711,9.5707465],[-13.6127298,9.570847],[-13.6127204,9.5709144],[-13.6126828,9.570962],[-13.6126037,9.5710162],[-13.6125071,9.5710771],[-13.6123046,9.5712014],[-13.6122737,9.5712399],[-13.6122563,9.5712794],[-13.6122727,9.5713851],[-13.6122952,9.5714222],[-13.6122899,9.5714513],[-13.6121692,9.5715082],[-13.6117414,9.5715889],[-13.6115938,9.5715571],[-13.611515,9.5715195],[-13.6113605,9.5713588],[-13.6112049,9.5711657],[-13.6110869,9.5710652],[-13.6109796,9.5709991],[-13.6108401,9.5709673],[-13.610647,9.5709885],[-13.6104298,9.5710758],[-13.6102071,9.5712873],[-13.6101079,9.5714831],[-13.6100408,9.5716259],[-13.6099872,9.5718137],[-13.609955,9.5719829],[-13.6099228,9.5721231],[-13.6098719,9.5722448],[-13.6095527,9.5726045],[-13.6094615,9.5727076],[-13.6094534,9.5727341],[-13.6094561,9.5727791],[-13.6095017,9.5728346],[-13.6095125,9.5729166],[-13.6094937,9.5729986],[-13.6092845,9.573218],[-13.6090162,9.5733371],[-13.6083002,9.5733741],[-13.608056,9.5733239],[-13.6079676,9.5733027],[-13.6078871,9.5732869],[-13.6076993,9.5732472],[-13.6069,9.5731784],[-13.6055563,9.5730171],[-13.604588,9.5728319],[-13.6040729,9.5726838],[-13.6032845,9.5725516],[-13.6025173,9.5724035],[-13.6017556,9.5722183],[-13.6014205,9.572108],[-13.598832,9.5716259],[-13.5980165,9.5714249],[-13.5970725,9.571245],[-13.5965575,9.5710863],[-13.5960318,9.570769],[-13.5917954,9.5648992],[-13.5869806,9.559077],[-13.5871966,9.5584383],[-13.5876785,9.5578973],[-13.5879845,9.5575032],[-13.5880172,9.5568831],[-13.5877007,9.5558304],[-13.5873252,9.5544813],[-13.5868102,9.5527622],[-13.5863596,9.5513919],[-13.5859358,9.5502599],[-13.5851795,9.5485618],[-13.583876,9.5458057],[-13.583613,9.5454194],[-13.5827494,9.5442397],[-13.5807807,9.54169],[-13.5781467,9.5379549],[-13.5739748,9.5319446],[-13.5714465,9.5284271],[-13.5700465,9.5266178],[-13.5695207,9.5261204],[-13.5691023,9.5256549],[-13.5687161,9.5252211],[-13.5683781,9.5248878],[-13.5679383,9.5244488],[-13.5676003,9.5237715],[-13.5675144,9.5225705],[-13.5675734,9.5222478],[-13.5675681,9.5221261],[-13.5675038,9.5219728],[-13.5662592,9.5205654],[-13.5650683,9.5192851],[-13.5632658,9.5166822],[-13.5622359,9.5153913],[-13.5612703,9.5137617],[-13.5595108,9.5124286],[-13.5574937,9.5099313],[-13.5570324,9.5092012],[-13.5563779,9.5078785],[-13.5561955,9.5072859],[-13.5559917,9.5069473],[-13.5549831,9.5062595],[-13.5543609,9.5057622],[-13.553642,9.5054024],[-13.5526229,9.5051063],[-13.5517571,9.5046432],[-13.5450269,9.5010429],[-13.542928,9.5008513],[-13.542468,9.5007888],[-13.5421568,9.5006142],[-13.5419369,9.5003762],[-13.5417384,9.5002227],[-13.5414702,9.5002121],[-13.5413039,9.5001222],[-13.5410303,9.5000957],[-13.5408425,9.5001645],[-13.5406856,9.5002743],[-13.5404952,9.5003629],[-13.5403276,9.5003867],[-13.5401867,9.5003788],[-13.5399252,9.5002915],[-13.5392761,9.5001222],[-13.5385519,9.4999635],[-13.5379404,9.4999053],[-13.5374844,9.4999529],[-13.5371894,9.5000058],[-13.5368782,9.4999582],[-13.536154,9.4996355],[-13.5348667,9.4991911],[-13.5335791,9.4986355],[-13.531251,9.4979],[-13.5292822,9.4973762],[-13.5281718,9.4969477],[-13.5260047,9.4960272],[-13.5215307,9.489805],[-13.5043052,9.5143751],[-13.4901413,9.5432635],[-13.4862518,9.5511958],[-13.4829466,9.5754784],[-13.4738187,9.6496363],[-13.5208675,9.6625357],[-13.5209723,9.6627222],[-13.5218057,9.6636667],[-13.5219543,9.6639174],[-13.522319,9.6644121],[-13.5227765,9.6649314],[-13.5231568,9.6649268],[-13.5232587,9.6650162],[-13.5233357,9.6657719],[-13.5236403,9.6672158],[-13.5239569,9.6671478],[-13.5240754,9.6671475],[-13.5241347,9.6672083],[-13.5248329,9.6682207],[-13.526102,9.6698946],[-13.5301227,9.6750357],[-13.5319761,9.6772574],[-13.5320959,9.6772844],[-13.5328432,9.6772394],[-13.5333851,9.6773262],[-13.5337254,9.6773137],[-13.5339568,9.6773608],[-13.534208,9.6773356],[-13.5347109,9.6772607],[-13.5359276,9.6768354],[-13.5364238,9.676765],[-13.5368242,9.6765716],[-13.5372712,9.6764708],[-13.5381633,9.6761028],[-13.5384174,9.6760753],[-13.5385218,9.6759225],[-13.5386649,9.6758855],[-13.5391668,9.6755833],[-13.5394445,9.6755278],[-13.5414168,9.6744722],[-13.5414777,9.6744445],[-13.5415703,9.6745748],[-13.5437062,9.6770281],[-13.5437036,9.677306],[-13.5460015,9.6810906],[-13.5461456,9.681752],[-13.546127,9.6819827],[-13.5460313,9.6822542],[-13.5458139,9.6825888],[-13.5459336,9.682946],[-13.5462898,9.6832971],[-13.5466314,9.6830823],[-13.5468597,9.6825753],[-13.5469893,9.6824085],[-13.5473647,9.6823553],[-13.5474664,9.6824437],[-13.5475411,9.6824308],[-13.5476121,9.6824729],[-13.5476313,9.6825285],[-13.5475161,9.6826823],[-13.5479846,9.6827729],[-13.5482565,9.6829822],[-13.5482255,9.6831326],[-13.5482982,9.6835002],[-13.5482379,9.6836292],[-13.5482328,9.6837741],[-13.5483982,9.6839811],[-13.548404,9.6841701],[-13.5487287,9.6843686],[-13.5490154,9.6846276],[-13.549376,9.6847305],[-13.5494884,9.6848157],[-13.5499102,9.6855366],[-13.5504594,9.6858903],[-13.5506605,9.6860879],[-13.5506804,9.6863103],[-13.5508661,9.686525],[-13.55092,9.686667],[-13.551026,9.6867412],[-13.551217,9.6866657],[-13.5515348,9.6867243],[-13.5517894,9.6868551],[-13.5520721,9.6868739],[-13.5523741,9.6867983],[-13.5527243,9.6868456],[-13.553866,9.6867027],[-13.5539544,9.6866016],[-13.5542063,9.6865952],[-13.554315,9.6864387],[-13.5545198,9.6862875],[-13.5548559,9.686266],[-13.5550989,9.6861806],[-13.5550877,9.6860339],[-13.55546,9.6858289],[-13.5557328,9.6859102],[-13.5557446,9.6859836],[-13.556013,9.6861275],[-13.5561048,9.6861312],[-13.5561669,9.686004],[-13.5564307,9.6859109],[-13.5567284,9.6859416],[-13.5568294,9.6863927],[-13.5565471,9.6865271],[-13.5564997,9.6867849],[-13.5565483,9.6869109],[-13.5566724,9.6869638],[-13.5567045,9.687077],[-13.5568077,9.6871336],[-13.5568867,9.6872513],[-13.5571248,9.6877534],[-13.5572719,9.6878387],[-13.5574011,9.6881233],[-13.557648,9.6885427],[-13.5577403,9.688614],[-13.5578885,9.6886508],[-13.5579957,9.6886133],[-13.5580623,9.6885452],[-13.5581356,9.6884693],[-13.5583582,9.6883952],[-13.5584995,9.6884287],[-13.558633,9.6883876],[-13.5590453,9.6884868],[-13.5591293,9.6885767],[-13.5591339,9.6886594],[-13.5593114,9.688966],[-13.5598743,9.6892902],[-13.5603064,9.6897675],[-13.5610486,9.6898325],[-13.5614673,9.6895319],[-13.5615882,9.6895137],[-13.5616848,9.6895379],[-13.561781,9.6897956],[-13.5619071,9.6898485],[-13.5621117,9.6897806],[-13.5623584,9.689574],[-13.5625402,9.6893838],[-13.56274,9.6890273],[-13.5628734,9.6890272],[-13.5630256,9.6891056],[-13.5630926,9.6892721],[-13.5633072,9.6893224],[-13.5636291,9.6892457],[-13.5640636,9.6893409],[-13.564254,9.6892219],[-13.5642916,9.6890659],[-13.5642808,9.68882],[-13.5643962,9.688701],[-13.5645544,9.6886455],[-13.5648267,9.6886183],[-13.5651364,9.6886519],[-13.5653776,9.6886932],[-13.56544,9.6887387],[-13.5655179,9.6888483],[-13.5656939,9.6890806],[-13.5658496,9.6894241],[-13.5658686,9.6896349],[-13.6081265,9.7533673],[-13.6103011,9.7437101],[-13.6117093,9.7378309],[-13.6117602,9.7377648],[-13.6121812,9.7377674],[-13.6124548,9.7377489],[-13.6126734,9.7377158],[-13.6127351,9.7377078],[-13.6127687,9.7377197],[-13.6127834,9.7377501],[-13.6127713,9.737803],[-13.6127232,9.7378322],[-13.6127244,9.7378519],[-13.6127767,9.737877],[-13.6128049,9.7379008],[-13.6128224,9.7379472],[-13.6128505,9.7379603],[-13.6129243,9.7379155],[-13.6129832,9.7378889],[-13.6130878,9.737844],[-13.6132033,9.7377516],[-13.6134098,9.7375057],[-13.613804,9.7370431],[-13.6141366,9.7365196],[-13.6143431,9.7360993],[-13.614555,9.7355072],[-13.614732,9.7347722],[-13.6148608,9.7341272],[-13.6150163,9.7332971],[-13.6151184,9.7326255],[-13.6151075,9.732274],[-13.615121,9.7318484],[-13.615164,9.7317214],[-13.6152257,9.7313645],[-13.6152631,9.7309337],[-13.61529,9.7306164],[-13.6153544,9.7302595],[-13.6154106,9.730019],[-13.615569,9.7298074],[-13.6157218,9.7296357],[-13.6158935,9.7294876],[-13.6161268,9.7292392],[-13.6163441,9.7290487],[-13.6164273,9.7289483],[-13.6165211,9.7288373],[-13.6166632,9.7286496],[-13.6167464,9.7283033],[-13.6168,9.7281658],[-13.6168564,9.7279067],[-13.6169342,9.7276106],[-13.6170012,9.727312],[-13.6171004,9.7270026],[-13.6172132,9.7266192],[-13.6172533,9.7262307],[-13.617315,9.7258368],[-13.6174303,9.7253398],[-13.617484,9.7249565],[-13.6175054,9.7247159],[-13.6175483,9.7244489],[-13.6176181,9.7239783],[-13.6176395,9.7236981],[-13.6176664,9.7234971],[-13.6176597,9.723205],[-13.6176597,9.723012],[-13.6176664,9.7227926],[-13.6176556,9.7226274],[-13.6176275,9.7224436],[-13.6176436,9.7222824],[-13.6176248,9.7220484],[-13.6176369,9.7219347],[-13.6176664,9.7217893],[-13.6177146,9.721636],[-13.6177629,9.7215038],[-13.6177951,9.7213531],[-13.6178085,9.7211892],[-13.6178032,9.7210702],[-13.6178058,9.7209486],[-13.6178032,9.7208402],[-13.6178166,9.7205785],[-13.6178273,9.7204384],[-13.6178112,9.7202877],[-13.6178058,9.720137],[-13.6177924,9.7199837],[-13.6177817,9.7197643],[-13.6178166,9.7196612],[-13.6179064,9.719521],[-13.6179909,9.7193902],[-13.6180539,9.7192976],[-13.618184,9.7191734],[-13.6182913,9.7190954],[-13.6183704,9.7190174],[-13.6184442,9.7189526],[-13.6185327,9.7188416],[-13.6185917,9.718757],[-13.6186588,9.7186671],[-13.6187366,9.7185032],[-13.618801,9.7183076],[-13.6188412,9.7181463],[-13.6189002,9.7179427],[-13.6189458,9.7176599],[-13.618986,9.7172659],[-13.6190558,9.7165574],[-13.619104,9.7163116],[-13.6191309,9.7161344],[-13.6194474,9.714416],[-13.6196405,9.7131417],[-13.6198122,9.7119916],[-13.6200723,9.7106698],[-13.6203727,9.7092791],[-13.6204907,9.7087583],[-13.6205901,9.7078646],[-13.6207294,9.7069605],[-13.6210085,9.7056623],[-13.6212418,9.7046683],[-13.6213464,9.7037774],[-13.6214108,9.703386],[-13.6215824,9.7027146],[-13.6217059,9.7021513],[-13.6217809,9.7013873],[-13.6218023,9.7006286],[-13.6218479,9.6996556],[-13.6218265,9.698487],[-13.6218292,9.6969324],[-13.6219096,9.6960097],[-13.6218774,9.6951689],[-13.6219686,9.6937915],[-13.621982,9.6926546],[-13.6221081,9.6916948],[-13.622127,9.6915045],[-13.6221779,9.6912797],[-13.6222316,9.6912031],[-13.622296,9.6911515],[-13.6223979,9.6910973],[-13.6225614,9.6910444],[-13.6228511,9.6909757],[-13.6230175,9.6907986],[-13.6231461,9.6906531],[-13.6233875,9.6902936],[-13.6236478,9.6900582],[-13.6239187,9.689741],[-13.624109,9.6895083],[-13.6242244,9.6892518],[-13.6242808,9.6889689],[-13.6243183,9.6887098],[-13.6242378,9.6884877],[-13.6240313,9.6881255],[-13.6238034,9.6878109],[-13.6237443,9.687602],[-13.6238114,9.6873323],[-13.6238489,9.6870336],[-13.6237524,9.6866899],[-13.6235136,9.6862562],[-13.623004,9.6858173],[-13.6225481,9.6854419],[-13.6222799,9.6851088],[-13.6222584,9.6848655],[-13.6223174,9.6847016],[-13.6223925,9.6844848],[-13.6226231,9.6841992],[-13.6228108,9.6839084],[-13.6231456,9.6832941],[-13.62324,9.6820364],[-13.623127,9.6810924],[-13.623122,9.6803549],[-13.6232573,9.6791292],[-13.623127,9.6773128],[-13.6230147,9.6763359],[-13.6231828,9.6752027],[-13.6233348,9.6748246],[-13.6235737,9.6742303],[-13.6240232,9.6735121],[-13.6242056,9.6727294],[-13.6243121,9.6722452],[-13.6242836,9.6719328],[-13.6241813,9.6716716],[-13.6240021,9.671423],[-13.6238258,9.6712418],[-13.6238241,9.67106],[-13.6239832,9.670946],[-13.6242996,9.6704322],[-13.6246455,9.6695248],[-13.6250103,9.66852],[-13.6255735,9.667071],[-13.6257452,9.6663783],[-13.6258364,9.6658442],[-13.6259973,9.6649504],[-13.6263621,9.6642894],[-13.626924,9.6636984],[-13.6270434,9.6634167],[-13.6269575,9.6632106],[-13.6266732,9.6630678],[-13.6264426,9.6628616],[-13.6260456,9.6626289],[-13.6257988,9.6624596],[-13.6257666,9.6622217],[-13.6257613,9.6618938],[-13.6258256,9.6616611],[-13.6258739,9.6615182],[-13.625874,9.6613703],[-13.625831,9.6611058],[-13.6258096,9.6608467],[-13.6258417,9.660466],[-13.625949,9.6601963],[-13.6259812,9.6600164],[-13.6259168,9.6597785],[-13.6259115,9.6595035],[-13.625949,9.6591703],[-13.6259115,9.6587948],[-13.6258793,9.6583823],[-13.6259544,9.6576473],[-13.6259544,9.6569968],[-13.6259786,9.6568117],[-13.6260591,9.6566901],[-13.6262951,9.6565896],[-13.6264426,9.656542],[-13.6264842,9.6565116],[-13.6264883,9.6564679],[-13.6264547,9.6564415],[-13.626405,9.6564362],[-13.6261342,9.656542],[-13.6260832,9.656538],[-13.6260457,9.6565182],[-13.626008,9.6564256],[-13.6259383,9.6560819],[-13.6258686,9.6556377],[-13.625603,9.6552199],[-13.6255682,9.6549581],[-13.6255575,9.6548497],[-13.6255924,9.654736],[-13.6256165,9.6545271],[-13.6256017,9.6543605],[-13.6256313,9.6542428],[-13.6256795,9.6541582],[-13.6257305,9.6540538],[-13.6257614,9.6539401],[-13.6258417,9.6537867],[-13.6258776,9.6536982],[-13.6259732,9.6534615],[-13.6260162,9.6531547],[-13.6260617,9.6529458],[-13.6261449,9.6527898],[-13.6262689,9.6526914],[-13.6264239,9.6524672],[-13.6264863,9.6523779],[-13.6265928,9.6521975],[-13.6266277,9.6520468],[-13.626633,9.6518088],[-13.6266249,9.6515416],[-13.6265901,9.6512826],[-13.626582,9.6510473],[-13.6265982,9.6509467],[-13.6266679,9.6508278],[-13.6268478,9.6507352],[-13.6270176,9.6506477],[-13.6272016,9.6505528],[-13.6272366,9.6504866],[-13.6272338,9.6504074],[-13.6271399,9.6502699],[-13.6270085,9.6500768],[-13.6269579,9.6499778],[-13.6269468,9.6498441],[-13.6269039,9.6496141],[-13.6268386,9.6494969],[-13.6267795,9.6493909],[-13.6266679,9.649191],[-13.6266777,9.6489108],[-13.6266904,9.648546],[-13.6266759,9.6480222],[-13.626609,9.6477922],[-13.6265285,9.6474141],[-13.6264561,9.6471893],[-13.6263863,9.6470596],[-13.626338,9.6469487],[-13.6262764,9.6465176],[-13.6261744,9.6460655],[-13.6260751,9.6456503],[-13.6260403,9.6454943],[-13.625988,9.6452513],[-13.6258944,9.6449846],[-13.6257641,9.6445688],[-13.6256513,9.6442912],[-13.625602,9.6442036],[-13.6253509,9.6437887],[-13.6250505,9.6433815],[-13.6251995,9.6431235],[-13.6251953,9.6429135],[-13.6252034,9.6427945],[-13.6251792,9.6426781],[-13.6250974,9.6426186],[-13.6250858,9.6425297],[-13.6251482,9.642398],[-13.6251751,9.6421118],[-13.6252063,9.6419948],[-13.6252363,9.6417687],[-13.6252146,9.6415545],[-13.6251601,9.6414293],[-13.6247903,9.6411048],[-13.624507,9.6408266],[-13.6243055,9.6406766],[-13.6241064,9.640523],[-13.6240109,9.6403493],[-13.6238212,9.6400262],[-13.6238041,9.6394082],[-13.6238329,9.639296],[-13.6238677,9.6392379],[-13.6248964,9.6383983],[-13.6256112,9.6375719],[-13.625807,9.6373366],[-13.6260751,9.637125],[-13.6261744,9.6370298],[-13.6261985,9.6369003],[-13.6262843,9.6367495],[-13.6263889,9.6365935],[-13.6264373,9.6365327],[-13.6265204,9.6364719],[-13.6266911,9.6361862],[-13.6267054,9.6361632],[-13.6267457,9.6361003],[-13.6268865,9.6358002],[-13.6268932,9.6357539],[-13.6268757,9.6357301],[-13.6266435,9.6355292],[-13.6264936,9.6354855],[-13.6263518,9.6354609],[-13.6258901,9.6353824],[-13.6256058,9.6353188],[-13.6253188,9.6352316],[-13.625064,9.63511],[-13.6248306,9.6350015],[-13.6246348,9.6349169],[-13.6245919,9.6348799],[-13.6245732,9.6348164],[-13.6245887,9.6346887],[-13.6246582,9.634632],[-13.6247414,9.6346029],[-13.6249318,9.6345844],[-13.6253637,9.634558],[-13.6258062,9.6344522],[-13.6262542,9.6343623],[-13.6265674,9.6342655],[-13.6271151,9.6339644],[-13.6274263,9.6337832],[-13.6276615,9.6337503],[-13.6278957,9.6337303],[-13.6281934,9.6337049],[-13.6283543,9.6336483],[-13.6286601,9.6335214],[-13.6289337,9.6333442],[-13.6293527,9.6331034],[-13.6295962,9.6329449],[-13.6297437,9.6328259],[-13.6298617,9.6326831],[-13.6298859,9.6326038],[-13.6299234,9.632461],[-13.6299905,9.6323869],[-13.6301139,9.6322679],[-13.6303848,9.631977],[-13.6306691,9.6316914],[-13.6307871,9.6315698],[-13.6311331,9.6312313],[-13.6316186,9.6307448],[-13.6319351,9.6304327],[-13.6323305,9.6301653],[-13.6326137,9.629888],[-13.6327263,9.6297346],[-13.6327666,9.629687],[-13.6327987,9.6296896],[-13.6329664,9.6298536],[-13.6330106,9.6298741],[-13.6330592,9.6298792],[-13.6331067,9.6298683],[-13.6331481,9.6298426],[-13.6331786,9.629805],[-13.6331949,9.6297596],[-13.6331953,9.6297114],[-13.6331796,9.6296658],[-13.6330294,9.6295389],[-13.6329972,9.6294701],[-13.633016,9.6294199],[-13.6331126,9.6293749],[-13.633303,9.6293168],[-13.6337879,9.6288498],[-13.6341747,9.6283066],[-13.6343544,9.6280554],[-13.6345449,9.6278359],[-13.6346253,9.6276772],[-13.6348399,9.6272859],[-13.6349874,9.6271193],[-13.6351349,9.6270029],[-13.6357331,9.6268945],[-13.6363205,9.6267649],[-13.6364439,9.6267464],[-13.636637,9.6265983],[-13.6368213,9.6263538],[-13.6368328,9.6261752],[-13.6368128,9.6259381],[-13.6367689,9.6255798],[-13.6367309,9.6252258],[-13.6366182,9.6249085],[-13.6365726,9.6247895],[-13.6364734,9.6246758],[-13.6364412,9.6246097],[-13.6364305,9.6245674],[-13.6364573,9.6245224],[-13.6369177,9.6242484],[-13.6370527,9.6243082],[-13.6372163,9.6243955],[-13.6372539,9.6244404],[-13.6373531,9.6245859],[-13.6374095,9.6246097],[-13.637498,9.6246229],[-13.6375945,9.6246811],[-13.6376938,9.6247525],[-13.6377528,9.6248477],[-13.6378574,9.6249402],[-13.6382611,9.6252073],[-13.6387412,9.6254718],[-13.6387854,9.6254856],[-13.6388176,9.6254797],[-13.6389652,9.6254064],[-13.6391385,9.6252914],[-13.6392915,9.6251536],[-13.6394976,9.6248992],[-13.6397296,9.6247035],[-13.6397859,9.6246255],[-13.6398369,9.6245224],[-13.6399737,9.6241495],[-13.6400407,9.6239406],[-13.6401736,9.6234791],[-13.6404377,9.6230309],[-13.6405423,9.6227823],[-13.640702,9.622396],[-13.6408346,9.6221397],[-13.6410532,9.6218601],[-13.6414703,9.6214707],[-13.641709,9.6212935],[-13.6423045,9.6209339],[-13.6427336,9.6208069],[-13.6430221,9.6207542],[-13.6432325,9.6206959],[-13.6433371,9.6206245],[-13.6434196,9.6205229],[-13.6434632,9.6203997],[-13.6434793,9.6203098],[-13.6435128,9.6200331],[-13.6435335,9.620005],[-13.6435398,9.6199963],[-13.6436748,9.6198166],[-13.6436847,9.6198032],[-13.6437743,9.6196632],[-13.6437971,9.619642],[-13.6438213,9.6196473],[-13.6439299,9.6197729],[-13.6439677,9.6197877],[-13.6440238,9.6197597],[-13.644174,9.6195878],[-13.6443376,9.6193075],[-13.6445146,9.6191938],[-13.6449036,9.6189796],[-13.6451951,9.6187383],[-13.6453863,9.6185485],[-13.6454105,9.618374],[-13.6453855,9.6182592],[-13.6453005,9.6181889],[-13.6449974,9.6181281],[-13.6444234,9.6180593],[-13.6440747,9.6180038],[-13.6439245,9.6179218],[-13.643836,9.6178583],[-13.64371,9.6178239],[-13.6436449,9.6178061],[-13.6435598,9.6178266],[-13.6434044,9.617891],[-13.6433318,9.6178821],[-13.6432567,9.6178398],[-13.6431593,9.6177455],[-13.6431588,9.6176547],[-13.6430877,9.6175317],[-13.6430515,9.6174815],[-13.6425378,9.6169988],[-13.6420094,9.6164779],[-13.6417952,9.616266],[-13.6415548,9.615908],[-13.6415464,9.6158763],[-13.6415588,9.6158524],[-13.641596,9.6158263],[-13.6416242,9.6157903],[-13.6416688,9.6157553],[-13.6416862,9.615752],[-13.641705,9.6157646],[-13.6419834,9.6161625],[-13.6420205,9.6161968],[-13.6420585,9.6161915],[-13.6422093,9.6160784],[-13.6423896,9.6159176],[-13.6424957,9.6158398],[-13.642619,9.615795],[-13.643032,9.6157791],[-13.6432252,9.6158372],[-13.6433647,9.6159033],[-13.6434907,9.6159907],[-13.6435981,9.6160858],[-13.643716,9.6161705],[-13.6439172,9.6161943],[-13.6440621,9.616181],[-13.644172,9.6161626],[-13.6442472,9.6161677],[-13.6443571,9.6162074],[-13.6444832,9.6162603],[-13.644644,9.6163609],[-13.6447277,9.6164896],[-13.6447648,9.6165221],[-13.6449499,9.6165697],[-13.6451618,9.6166015],[-13.6457831,9.6164849],[-13.6460147,9.6163158],[-13.6462213,9.6161546],[-13.646806,9.615668],[-13.6472056,9.615668],[-13.6474631,9.6156732],[-13.6476884,9.6156468],[-13.6480398,9.615496],[-13.6481578,9.6153269],[-13.6482973,9.6149011],[-13.6483241,9.6146419],[-13.6482945,9.6143511],[-13.6481524,9.6141474],[-13.6481846,9.6140099],[-13.6482436,9.6138089],[-13.6483455,9.6136132],[-13.6484904,9.6134174],[-13.6485815,9.6132642],[-13.6487318,9.6130684],[-13.6488283,9.6129309],[-13.6489035,9.6128727],[-13.6489759,9.6128515],[-13.6490161,9.612849],[-13.6490429,9.612833],[-13.6495579,9.6121931],[-13.6496116,9.6120424],[-13.6498624,9.611803],[-13.6499938,9.6116892],[-13.6500206,9.6115134],[-13.6499521,9.6112212],[-13.6501037,9.6109621],[-13.6501613,9.6108391],[-13.6502297,9.6107426],[-13.650455,9.6106817],[-13.6507072,9.6106659],[-13.6508829,9.610515],[-13.6510545,9.6104014],[-13.6511926,9.6101978],[-13.6512409,9.6100629],[-13.6513523,9.6098527],[-13.651693,9.6097469],[-13.6520953,9.6097628],[-13.6524197,9.6095961],[-13.6528785,9.6093369],[-13.6531851,9.609196],[-13.6535584,9.6091013],[-13.6537045,9.6091175],[-13.6539273,9.6091175],[-13.6541016,9.6090619],[-13.6542545,9.6088451],[-13.6544126,9.6085833],[-13.6545763,9.6081945],[-13.6547507,9.6077925],[-13.6549036,9.606941],[-13.654925,9.6067267],[-13.6548982,9.6065892],[-13.6548687,9.6064384],[-13.6548659,9.6063116],[-13.6549732,9.6060603],[-13.6551556,9.6057218],[-13.6552924,9.6055789],[-13.6554104,9.6053675],[-13.6556358,9.6050607],[-13.6558503,9.6048174],[-13.6561909,9.6043174],[-13.6566147,9.6039365],[-13.6567087,9.6037992],[-13.6567945,9.603696],[-13.6568777,9.6036325],[-13.6569607,9.6036167],[-13.6569742,9.6035928],[-13.6569769,9.6035664],[-13.6569984,9.6032465],[-13.6569769,9.6031644],[-13.656926,9.6030745],[-13.6569018,9.6030612],[-13.6567597,9.6030586],[-13.656706,9.6030323],[-13.6566711,9.6029845],[-13.6566764,9.6027757],[-13.6567033,9.6027465],[-13.6568374,9.6026751],[-13.6569072,9.6026222],[-13.6569366,9.6025483],[-13.656926,9.6025006],[-13.6568266,9.6022891],[-13.656816,9.6021726],[-13.6568374,9.6020695],[-13.6569286,9.6019427],[-13.6570842,9.6018738],[-13.6571834,9.6018289],[-13.657221,9.6017495],[-13.6572478,9.6016807],[-13.6572586,9.6016331],[-13.6572586,9.6015275],[-13.6572264,9.6013793],[-13.6572343,9.6012445],[-13.6573424,9.6010041],[-13.6574216,9.6008574],[-13.6574731,9.6005701],[-13.6575423,9.6002585],[-13.657642,9.599901],[-13.6576367,9.5997528],[-13.6575938,9.5996523],[-13.6575134,9.599544],[-13.6573632,9.5994698],[-13.6572317,9.5994592],[-13.657113,9.59948],[-13.656883,9.59961],[-13.6566791,9.599737],[-13.6566014,9.5997211],[-13.6565317,9.5996893],[-13.6563976,9.5995862],[-13.6563064,9.599491],[-13.6562393,9.5994064],[-13.6560959,9.5993375],[-13.6559951,9.5993165],[-13.6559604,9.5992583],[-13.6559416,9.5991763],[-13.6559281,9.5991552],[-13.6558906,9.599134],[-13.6558101,9.5991367],[-13.6557538,9.5989435],[-13.6557457,9.5988669],[-13.6557538,9.5988245],[-13.6557806,9.5987532],[-13.6558315,9.5986527],[-13.6563653,9.5983523],[-13.6564727,9.5983379],[-13.6565584,9.5983883],[-13.6566174,9.598465],[-13.6567328,9.5986526],[-13.6569044,9.5987374],[-13.6570145,9.5987373],[-13.6571217,9.5986739],[-13.6572289,9.5985125],[-13.6572477,9.5982693],[-13.6573228,9.5979228],[-13.6575052,9.5975552],[-13.6575831,9.5972906],[-13.6575642,9.5970844],[-13.6573471,9.5969415],[-13.6572182,9.5968385],[-13.6570467,9.5967828],[-13.6570063,9.596738],[-13.656985,9.5966506],[-13.6570224,9.5962355],[-13.6570681,9.5957567],[-13.6571056,9.5956695],[-13.6571727,9.5956483],[-13.6578567,9.5957197],[-13.6578941,9.5957013],[-13.6578996,9.5956562],[-13.6579275,9.5952846],[-13.6579781,9.5952821],[-13.6579806,9.5950202],[-13.657991,9.5949763],[-13.6579983,9.5948919],[-13.6580014,9.5947809],[-13.6580149,9.5944529],[-13.6579908,9.5943603],[-13.6579183,9.5942758],[-13.6577789,9.5942942],[-13.6576286,9.5943049],[-13.6574879,9.5943074],[-13.6574583,9.5942943],[-13.6574409,9.5942625],[-13.6574624,9.5940932],[-13.6574851,9.594051],[-13.6575268,9.5940535],[-13.6579197,9.5941871],[-13.6579411,9.5941859],[-13.6579573,9.5941382],[-13.6579546,9.5940747],[-13.6579345,9.5939835],[-13.6579102,9.5939188],[-13.6576864,9.5938711],[-13.6576755,9.5938659],[-13.6576555,9.5938472],[-13.6576685,9.5935569],[-13.6576537,9.5930623],[-13.6576516,9.5929894],[-13.6577278,9.5927234],[-13.6577225,9.5924906],[-13.6577225,9.5923293],[-13.6577198,9.5918559],[-13.6577439,9.5916284],[-13.6577493,9.5911524],[-13.6577573,9.590642],[-13.6577895,9.5904727],[-13.6578351,9.5903114],[-13.6579585,9.5900099],[-13.658039,9.5898353],[-13.6581208,9.5897877],[-13.658208,9.5897507],[-13.6582643,9.5897666],[-13.6582857,9.5898195],[-13.6582925,9.5900336],[-13.6583025,9.5900605],[-13.658322,9.590064],[-13.6590006,9.5898022],[-13.6590341,9.5897943],[-13.659065,9.5897678],[-13.6592367,9.5894425],[-13.6592446,9.5894201],[-13.6592353,9.5893988],[-13.6592595,9.5892957],[-13.6593103,9.5891847],[-13.6593775,9.5890524],[-13.6594847,9.5888832],[-13.6595947,9.5887325],[-13.6597556,9.5884971],[-13.6598602,9.5883463],[-13.6599675,9.5881982],[-13.6602169,9.5878967],[-13.6603618,9.5877513],[-13.6604987,9.5876798],[-13.6606623,9.5876348],[-13.6608794,9.5875635],[-13.6609976,9.587447],[-13.6610539,9.5873069],[-13.6611424,9.5870768],[-13.6612174,9.5869261],[-13.6614342,9.5867152],[-13.6616707,9.5864553],[-13.6619604,9.5863363],[-13.6621669,9.5862411],[-13.6622904,9.5861458],[-13.6623761,9.5861036],[-13.662513,9.5860823],[-13.6626416,9.5861353],[-13.6627437,9.5861352],[-13.6628294,9.5860904],[-13.6630011,9.5858867],[-13.6631487,9.585757],[-13.6633498,9.5856646],[-13.6637408,9.5856287],[-13.6641485,9.5855758],[-13.6643416,9.5854489],[-13.6645407,9.5852626],[-13.6647445,9.5850907],[-13.6651522,9.5846992],[-13.6654607,9.5842693],[-13.6655331,9.5841134],[-13.6655466,9.5840512],[-13.6655431,9.5840327],[-13.6655428,9.5840241],[-13.6655492,9.5840155],[-13.6655597,9.5840135],[-13.6655985,9.5840217],[-13.665682,9.5840829],[-13.6657193,9.5840936],[-13.6657437,9.5840763],[-13.666377,9.5829237],[-13.6665335,9.5821549],[-13.6666245,9.5818534],[-13.6666972,9.5815308],[-13.6666892,9.5814064],[-13.6666597,9.5813138],[-13.6665926,9.5811657],[-13.6665416,9.5810732],[-13.6664988,9.5809726],[-13.6664531,9.5808511],[-13.6662707,9.5804887],[-13.6662036,9.5802904],[-13.6661768,9.5800153],[-13.6661553,9.5794811],[-13.6662305,9.5784337],[-13.6663538,9.5772647],[-13.6664101,9.5758761],[-13.6663806,9.5755508],[-13.666319,9.5753816],[-13.6662492,9.5750351],[-13.666209,9.5747204],[-13.6661902,9.5745221],[-13.6661687,9.5743343],[-13.6661763,9.573952],[-13.6661608,9.573829],[-13.6661563,9.5737959],[-13.6661233,9.5737708],[-13.6656511,9.5736069],[-13.6653828,9.5735567],[-13.6648868,9.5734376],[-13.6646801,9.5731864],[-13.6645944,9.5730224],[-13.6643771,9.5730171],[-13.6643235,9.5730091],[-13.6642806,9.5730143],[-13.6641517,9.572992],[-13.6638756,9.5729113],[-13.6635268,9.5728875],[-13.6630603,9.5728689],[-13.6628482,9.5723969],[-13.6627205,9.5720436],[-13.6627602,9.5720062],[-13.6628885,9.5720702],[-13.6629942,9.5722456],[-13.6631645,9.5726681],[-13.6633147,9.5727369],[-13.6638296,9.572758],[-13.6646506,9.5727102],[-13.6646776,9.5726494],[-13.6647366,9.5724987],[-13.6648357,9.5722898],[-13.664943,9.5721046],[-13.6650825,9.5718957],[-13.6652541,9.5716497],[-13.6656374,9.5709584],[-13.6658337,9.570477],[-13.6659378,9.5702897],[-13.6662144,9.5699173],[-13.6664021,9.5697586],[-13.6664773,9.5696368],[-13.6665255,9.56951],[-13.6665739,9.5692666],[-13.6665523,9.5691027],[-13.6665416,9.5687377],[-13.666504,9.5684732],[-13.6664289,9.5679654],[-13.6664317,9.5678992],[-13.6664155,9.5678331],[-13.6663405,9.5677722],[-13.6662467,9.5677087],[-13.666209,9.5675792],[-13.666209,9.5674337],[-13.6662546,9.5672354],[-13.6664098,9.5670312],[-13.6664692,9.5663652],[-13.6665764,9.5661272],[-13.6666355,9.5658706],[-13.666665,9.5655717],[-13.6667025,9.5654076],[-13.6667187,9.5652913],[-13.6667293,9.5652357],[-13.666708,9.5651934],[-13.6666596,9.5651775],[-13.6665604,9.5651987],[-13.666504,9.5651935],[-13.6662895,9.5652516],[-13.6660455,9.5652886],[-13.6659461,9.5652676],[-13.6659087,9.5652066],[-13.6658614,9.564859],[-13.6658442,9.5645852],[-13.6658147,9.5643789],[-13.6658335,9.564236],[-13.6659247,9.5641911],[-13.6659891,9.5639343],[-13.6658443,9.5639014],[-13.6658318,9.5638816],[-13.6658416,9.5638432],[-13.6658678,9.5637275],[-13.6658824,9.5637024],[-13.6659033,9.5636951],[-13.6660454,9.5637388],[-13.666095,9.563473],[-13.6659985,9.5634438],[-13.6659864,9.5634241],[-13.6659811,9.563383],[-13.6660341,9.5631634],[-13.666042,9.5631457],[-13.6660622,9.5631376],[-13.6661366,9.563141],[-13.6662224,9.5628713],[-13.6662841,9.5624772],[-13.6663015,9.5623634],[-13.6663029,9.5621003],[-13.6663243,9.561935],[-13.6663485,9.5617921],[-13.6663847,9.5616043],[-13.6664155,9.5614232],[-13.666437,9.5611481],[-13.6665255,9.5608836],[-13.6668956,9.5604247],[-13.6673905,9.5600729],[-13.6676359,9.5599618],[-13.6681911,9.5598137],[-13.6684165,9.5596972],[-13.6685767,9.559577],[-13.66908,9.5593998],[-13.6695939,9.559253],[-13.6699909,9.5591154],[-13.670294,9.5590176],[-13.6705381,9.5589938],[-13.6708482,9.558892],[-13.6711094,9.5588192],[-13.6714661,9.5586804],[-13.6717746,9.5584912],[-13.6720321,9.5582029],[-13.6723056,9.5579966],[-13.672869,9.5578935],[-13.6730326,9.5578775],[-13.6731694,9.5577638],[-13.6731694,9.5575999],[-13.6731158,9.557494],[-13.67281,9.5573749],[-13.6725363,9.5572878],[-13.6723083,9.5572507],[-13.6717612,9.5573142],[-13.6714474,9.5574914],[-13.6712248,9.5576341],[-13.6711587,9.557669],[-13.6710612,9.5576738],[-13.6705248,9.5575787],[-13.6702404,9.5573592],[-13.6701478,9.5572878],[-13.6700876,9.557137],[-13.6700178,9.5570139],[-13.6699615,9.5568394],[-13.6699709,9.5567415],[-13.6700273,9.5565709],[-13.6701159,9.5562512],[-13.6701192,9.5559428],[-13.6701369,9.5557936],[-13.6701667,9.5556944],[-13.6702458,9.5556636],[-13.6705568,9.5558039],[-13.6706373,9.5557959],[-13.6707553,9.5557615],[-13.6708975,9.5556532],[-13.6710048,9.5552723],[-13.6710638,9.5550898],[-13.6711255,9.5549098],[-13.6713218,9.554605],[-13.6715964,9.5543511],[-13.6719741,9.5540803],[-13.672356,9.553862],[-13.6729896,9.553619],[-13.6731908,9.5535927],[-13.6732659,9.5536481],[-13.6735824,9.5541852],[-13.6736065,9.5542354],[-13.6735985,9.5542778],[-13.6735314,9.5544074],[-13.6735421,9.5544655],[-13.6735716,9.5544973],[-13.6736387,9.5545211],[-13.6736709,9.5544999],[-13.6737004,9.5544603],[-13.6739095,9.554016],[-13.6739941,9.5539736],[-13.6741472,9.554171],[-13.674501,9.5539273],[-13.6743414,9.5536641],[-13.6745507,9.5536244],[-13.6746123,9.5535795],[-13.674615,9.5534605],[-13.6745828,9.5533228],[-13.6745989,9.5532568],[-13.6746392,9.5532249],[-13.6748837,9.5531407],[-13.6751086,9.5530768],[-13.6751997,9.552897],[-13.6752132,9.5527621],[-13.6752024,9.5526564],[-13.6751783,9.5525769],[-13.6750871,9.5524553],[-13.6749932,9.5524023],[-13.6749815,9.5523039],[-13.6750254,9.5522384],[-13.6752191,9.5520426],[-13.6754008,9.5519857],[-13.6755833,9.5520559],[-13.6756611,9.5521881],[-13.6758328,9.5523547],[-13.6758891,9.5525108],[-13.6759213,9.5527779],[-13.6759455,9.5528494],[-13.6759749,9.5528943],[-13.6760688,9.5529313],[-13.6761466,9.5529366],[-13.6762164,9.552905],[-13.6763504,9.5527383],[-13.6764872,9.5525982],[-13.6767608,9.5524129],[-13.6767957,9.552421],[-13.6768305,9.5524526],[-13.676919,9.5526695],[-13.6769379,9.5527013],[-13.6769593,9.5527012],[-13.6772624,9.5525769],[-13.6772839,9.5525506],[-13.6772811,9.5525108],[-13.6771739,9.5522992],[-13.6771669,9.5522436],[-13.677198,9.5522251],[-13.6775441,9.5521565],[-13.677772,9.5521062],[-13.678102,9.5518232],[-13.6783649,9.5515296],[-13.6784801,9.5512519],[-13.6785257,9.5510852],[-13.6785874,9.5510005],[-13.678751,9.5509001],[-13.6787644,9.5508497],[-13.6787456,9.5507862],[-13.6786921,9.5506832],[-13.6786223,9.5506409],[-13.6786357,9.5505191],[-13.6786705,9.550416],[-13.6788557,9.5502679],[-13.6790702,9.5502202],[-13.6791493,9.5501957],[-13.6791855,9.5501329],[-13.6792794,9.5498446],[-13.6792779,9.5498114],[-13.6792579,9.5497705],[-13.6791962,9.5496966],[-13.6791506,9.5496039],[-13.6791426,9.5494612],[-13.6791989,9.5488951],[-13.6793653,9.5478292],[-13.6795449,9.5472261],[-13.679671,9.5469854],[-13.6799312,9.5467659],[-13.680536,9.5465092],[-13.6808129,9.5463334],[-13.6808762,9.5462659],[-13.6809199,9.5461977],[-13.6809343,9.5460067],[-13.6809934,9.5458268],[-13.6810711,9.5455623],[-13.6817122,9.5448058],[-13.6824149,9.5442874],[-13.6826912,9.5441214],[-13.6830466,9.5438199],[-13.6831927,9.5436644],[-13.6833335,9.5435639],[-13.6835267,9.5434779],[-13.6835893,9.5434312],[-13.6836635,9.5433245],[-13.6836849,9.5432294],[-13.6837749,9.5430217],[-13.6840712,9.542424],[-13.684373,9.5418672],[-13.684507,9.5415656],[-13.6849201,9.540698],[-13.6852902,9.5401029],[-13.6854646,9.5399627],[-13.6860439,9.5406081],[-13.6871195,9.5396532],[-13.6872133,9.5396744],[-13.6885169,9.5407562],[-13.6884392,9.5408435],[-13.6886671,9.5410207],[-13.6887208,9.5409467],[-13.6889381,9.5411133],[-13.6890159,9.5410472],[-13.6871811,9.539476],[-13.6866206,9.5387935],[-13.6870873,9.5384602],[-13.6872939,9.5380502],[-13.6878678,9.5377672],[-13.6878946,9.5375689],[-13.6882674,9.5372435],[-13.6882836,9.5370954],[-13.6888227,9.5368785],[-13.6887932,9.5367144],[-13.6887154,9.5366112],[-13.6885357,9.5365002],[-13.6882272,9.5363282],[-13.6882111,9.5362701],[-13.6882192,9.5362039],[-13.6884875,9.5358508],[-13.6885479,9.5357852],[-13.6886954,9.5357993],[-13.6890855,9.5359104],[-13.6891366,9.5359156],[-13.6892144,9.5359394],[-13.6892734,9.5359473],[-13.6893431,9.5359579],[-13.6894129,9.5359314],[-13.6895308,9.5358654],[-13.6897616,9.5355586],[-13.6898688,9.5353602],[-13.6899412,9.5351327],[-13.6900915,9.5348867],[-13.6902147,9.5346647],[-13.6903211,9.5344733],[-13.6904421,9.5342554],[-13.6905822,9.5340032],[-13.6910141,9.5334371],[-13.6911213,9.5333207],[-13.6913521,9.5334185],[-13.6916337,9.5336116],[-13.6917087,9.5335694],[-13.6921755,9.532797],[-13.6922989,9.5325906],[-13.6923042,9.5325113],[-13.6922507,9.5324821],[-13.6918939,9.5322441],[-13.6918135,9.5321964],[-13.6917813,9.5321435],[-13.6918,9.5319319],[-13.6918268,9.531776],[-13.6918616,9.5316093],[-13.6918804,9.5314585],[-13.691902,9.5312813],[-13.6918643,9.5309824],[-13.6918885,9.5306967],[-13.6918938,9.5304216],[-13.6919394,9.5301121],[-13.691983,9.5297908],[-13.6919864,9.5295811],[-13.6919873,9.529274],[-13.6920227,9.5292365],[-13.6920762,9.5292287],[-13.6921353,9.5292894],[-13.6922318,9.5293476],[-13.6923097,9.529374],[-13.6925484,9.5293926],[-13.6926557,9.5294216],[-13.6928139,9.5296704],[-13.6929293,9.5298264],[-13.6930687,9.5299613],[-13.6931492,9.530112],[-13.6932377,9.530194],[-13.6933128,9.5301702],[-13.6933529,9.530128],[-13.6934442,9.5298766],[-13.6935488,9.5297946],[-13.6936561,9.5297523],[-13.6937178,9.5297655],[-13.6937929,9.5298369],[-13.6938922,9.529866],[-13.6939752,9.5298476],[-13.6943507,9.529763],[-13.6965179,9.5290884],[-13.6966091,9.5290197],[-13.69662,9.5289032],[-13.6965904,9.5287525],[-13.6955831,9.5258855],[-13.6954291,9.5254803],[-13.6952896,9.5251893],[-13.6953218,9.5250518],[-13.6954666,9.5248666],[-13.6955658,9.5244937],[-13.6961773,9.5236975],[-13.6966118,9.5233166],[-13.6967164,9.5233906],[-13.6968559,9.5233047],[-13.6969927,9.5231394],[-13.6969713,9.5229965],[-13.6973226,9.5225018],[-13.6976123,9.5221156],[-13.6977894,9.5218669],[-13.6979982,9.5216454],[-13.6982829,9.5213008],[-13.6987335,9.5210205],[-13.7002282,9.520454],[-13.7014313,9.5200533],[-13.701548,9.520262],[-13.7004761,9.5205618],[-13.7004602,9.5205972],[-13.7004609,9.5206342],[-13.7003561,9.5207215],[-13.7006485,9.5213617],[-13.7006284,9.5215065],[-13.7008336,9.5219595],[-13.7008953,9.5223061],[-13.7012869,9.5234541],[-13.7013218,9.5234886],[-13.7013942,9.5234965],[-13.703642,9.5225732],[-13.7041704,9.5223377],[-13.704484,9.5222246],[-13.7045753,9.5222425],[-13.7046289,9.5222637],[-13.7046746,9.5222981],[-13.704704,9.5223615],[-13.7047201,9.5224092],[-13.7047658,9.52247],[-13.7047899,9.5225679],[-13.70479,9.5225943],[-13.7047464,9.5226339],[-13.7047813,9.5227212],[-13.7047437,9.5227515],[-13.7046119,9.5228609],[-13.7046257,9.5229514],[-13.7047464,9.5231603],[-13.7047199,9.5232233],[-13.7048913,9.5234222],[-13.7049744,9.5234646],[-13.705207,9.523376],[-13.705549,9.5238694],[-13.7055866,9.5238905],[-13.7056214,9.5238906],[-13.7060694,9.524409],[-13.705954,9.5244871],[-13.7061337,9.5247146],[-13.7061652,9.5247516],[-13.7061343,9.5247794],[-13.7061638,9.5248707],[-13.706084,9.5248839],[-13.7061142,9.5251054],[-13.7062235,9.5250995],[-13.7063912,9.5252688],[-13.7065254,9.5253454],[-13.7066151,9.5253451],[-13.7067207,9.5253164],[-13.7067251,9.5252297],[-13.7067496,9.5252202],[-13.706772,9.5252416],[-13.7068069,9.525278],[-13.706841,9.5252585],[-13.7071584,9.5255887],[-13.7074695,9.5258771],[-13.7080194,9.5262765],[-13.7086805,9.5267256],[-13.7093041,9.5271203],[-13.709964,9.5274668],[-13.710884,9.5278663],[-13.712002,9.528265],[-13.7130539,9.5285382],[-13.7140734,9.5287343],[-13.7151189,9.5288535],[-13.7160499,9.5288847],[-13.7168371,9.5288437],[-13.7168398,9.5288781],[-13.7168237,9.5289283],[-13.7168197,9.5289455],[-13.7168264,9.5289733],[-13.7168452,9.5289733],[-13.7168693,9.5289654],[-13.716931,9.5288886],[-13.7204836,9.523536],[-13.7205345,9.5235043],[-13.7205801,9.523499],[-13.7225583,9.5241372],[-13.722583,9.5241615],[-13.7225879,9.5242029],[-13.7219196,9.5264134],[-13.7219591,9.5264717],[-13.7220281,9.5264523],[-13.7259785,9.513563],[-13.7263287,9.5125902],[-13.7267775,9.5117292],[-13.7279364,9.509662],[-13.7279216,9.5095842],[-13.7278358,9.5095762],[-13.7266711,9.5116674],[-13.7262108,9.5125547],[-13.7258411,9.5135315],[-13.7227045,9.5237081],[-13.7226562,9.5239487],[-13.7226297,9.5240028],[-13.7225952,9.5240077],[-13.7206422,9.5234142],[-13.7206354,9.5233944],[-13.7206374,9.5233738],[-13.7206526,9.5233112],[-13.7206338,9.5232742],[-13.720607,9.523253],[-13.7205748,9.5232715],[-13.7205104,9.5233403],[-13.7204219,9.5235016],[-13.7169136,9.528759],[-13.71607,9.5288007],[-13.715133,9.5287569],[-13.7140924,9.5286353],[-13.7130665,9.5284456],[-13.712021,9.5281635],[-13.7109163,9.5277598],[-13.7100347,9.5273729],[-13.7093837,9.52703],[-13.7087179,9.5266482],[-13.7080462,9.526213],[-13.7075044,9.5258004],[-13.7070564,9.5253454],[-13.7069089,9.525186],[-13.7069815,9.5251047],[-13.7068945,9.5250046],[-13.7069283,9.5249791],[-13.7068892,9.5249264],[-13.706859,9.524933],[-13.7068003,9.5248574],[-13.7067578,9.5248986],[-13.7063094,9.5244804],[-13.7062816,9.5245131],[-13.7056744,9.5238338],[-13.7054822,9.5235591],[-13.705251,9.5231962],[-13.705136,9.5229007],[-13.7050797,9.5227609],[-13.7048309,9.5221427],[-13.7045379,9.5207719],[-13.7045325,9.5206026],[-13.7046049,9.52051],[-13.7047337,9.5204359],[-13.7047605,9.5203433],[-13.7047632,9.5202215],[-13.704672,9.5200312],[-13.704558,9.5198209],[-13.7045325,9.5197349],[-13.7045191,9.5196622],[-13.7044877,9.5195927],[-13.7045038,9.5193858],[-13.7044493,9.5192614],[-13.7043392,9.5192878],[-13.7042973,9.5192033],[-13.7043753,9.5189531],[-13.7045282,9.5188621],[-13.7049933,9.5187801],[-13.7054179,9.5186281],[-13.7057618,9.5184084],[-13.7061405,9.5181497],[-13.7077176,9.5173528],[-13.7093904,9.5167542],[-13.7101332,9.5166025],[-13.7101408,9.5166402],[-13.710159,9.5166751],[-13.7102116,9.516691],[-13.7107605,9.5165182],[-13.7108249,9.5165486],[-13.7108672,9.5166264],[-13.710963,9.517058],[-13.7113274,9.5177322],[-13.7116621,9.5181808],[-13.712688,9.5204677],[-13.7126918,9.5205416],[-13.7125319,9.5212571],[-13.7124647,9.521453],[-13.7124852,9.5214939],[-13.7125334,9.5215152],[-13.7126918,9.521494],[-13.7127909,9.5215813],[-13.7147918,9.519764],[-13.7146993,9.5196502],[-13.7147115,9.5196105],[-13.7147623,9.519563],[-13.7138076,9.5185127],[-13.7137736,9.5184517],[-13.7135876,9.5173779],[-13.7135956,9.5173251],[-13.7136198,9.5173197],[-13.7142381,9.5172377],[-13.7142916,9.5172364],[-13.7143011,9.5172601],[-13.7143065,9.5173355],[-13.714411,9.5179176],[-13.7144941,9.5178964],[-13.7144163,9.5172166],[-13.7151353,9.5170631],[-13.7151885,9.51706],[-13.715213,9.5171133],[-13.7155804,9.518317],[-13.7159184,9.5186821],[-13.7159641,9.5186873],[-13.7160231,9.5186688],[-13.7192148,9.5157855],[-13.7209369,9.5130978],[-13.7222726,9.5109684],[-13.7224014,9.5107885],[-13.7225918,9.5105028],[-13.7237325,9.508734],[-13.7236649,9.5086943],[-13.7231202,9.5083759],[-13.722628,9.5080439],[-13.722506,9.5079672],[-13.7224335,9.5079275],[-13.7223799,9.5078945],[-13.7222056,9.5077781],[-13.7213311,9.5072649],[-13.7212869,9.5072364]]]]}]}
