# Supplementary material
Source: ML conference proceedings conference paper supplement (https://proceedings.neurips.cc/paper_files/paper/2022/hash/9d3faa41886997cfc2128b930077fa49-Abstract.html)
Supplement: Supplementary file 1 [file 9d3faa41886997cfc2128b930077fa49-Supplemental-Conference.zip › code/ebola/map/geojson/coyah.geojson]

{"type":"GeometryCollection","geometries":[{"type":"MultiPolygon","coordinates":[[[[-13.4103977,9.706229],[-13.4091108,9.7065549],[-13.4092154,9.7066395],[-13.4093871,9.7066455],[-13.409438,9.7065999],[-13.4095286,9.7065972],[-13.4095004,9.7066851],[-13.409544,9.7067532],[-13.4097277,9.7069482],[-13.4097364,9.7070612],[-13.4097646,9.7071306],[-13.4097666,9.7072179],[-13.4097552,9.7072972],[-13.4097103,9.7074399],[-13.409774,9.7074618],[-13.4100496,9.7074644],[-13.4101187,9.7075093],[-13.4102099,9.7076091],[-13.4102266,9.7076885],[-13.4102863,9.7077208],[-13.4103674,9.7078385],[-13.4105431,9.707968],[-13.4106296,9.708087],[-13.410702,9.7081082],[-13.4107315,9.7082],[-13.4107517,9.708397],[-13.4107255,9.7084505],[-13.4107711,9.7084935],[-13.4109827,9.7085447],[-13.4104985,9.7096366],[-13.4106152,9.7098349],[-13.410693,9.7101184],[-13.4102786,9.7104423],[-13.4101646,9.7106247],[-13.4101525,9.710938],[-13.4101995,9.7110504],[-13.4100519,9.7111945],[-13.4101069,9.7113729],[-13.4100385,9.7115091],[-13.4103443,9.7122427],[-13.4106367,9.7128785],[-13.4107547,9.7129843],[-13.4106259,9.7130491],[-13.4104496,9.7133035],[-13.4104281,9.7134238],[-13.4103316,9.7135362],[-13.4102229,9.7136089],[-13.4100137,9.7138521],[-13.4098689,9.7139446],[-13.4097012,9.7140134],[-13.4094028,9.7140398],[-13.4093029,9.7141046],[-13.409201,9.7141984],[-13.4091427,9.7142037],[-13.4087631,9.7140682],[-13.4084835,9.7141898],[-13.4084419,9.7143326],[-13.4081375,9.7145441],[-13.4070053,9.7161006],[-13.4069235,9.7163068],[-13.4064715,9.716702],[-13.4058226,9.7171311],[-13.4052907,9.7165397],[-13.4033709,9.7164578],[-13.3995384,9.7169545],[-13.3987751,9.7170574],[-13.3983192,9.7167188],[-13.3972086,9.7158942],[-13.3957281,9.7159365],[-13.3944406,9.7172055],[-13.3939396,9.7171965],[-13.3929904,9.7171796],[-13.3908704,9.7171416],[-13.3896798,9.7171203],[-13.3885183,9.7170997],[-13.386866,9.7170363],[-13.3849134,9.7172055],[-13.381826,9.7173042],[-13.3811233,9.7173068],[-13.3810469,9.7176835],[-13.3807384,9.7182334],[-13.3805989,9.7183524],[-13.3804246,9.7186617],[-13.3803052,9.7188058],[-13.3797876,9.7192499],[-13.3797755,9.7192777],[-13.379577,9.7192486],[-13.3788652,9.7192663],[-13.3787401,9.7194746],[-13.3786055,9.7196927],[-13.3782425,9.7199924],[-13.3779535,9.7202444],[-13.3778532,9.7201711],[-13.3777617,9.7200937],[-13.3776254,9.720138],[-13.3770405,9.7195903],[-13.3767372,9.7198363],[-13.376554,9.7200917],[-13.3761685,9.7204747],[-13.3758999,9.7202817],[-13.3751971,9.7201992],[-13.3750907,9.7203422],[-13.3747812,9.7205758],[-13.3744138,9.721472],[-13.3741294,9.7218368],[-13.3736654,9.7226511],[-13.3733436,9.7233834],[-13.3725787,9.724712],[-13.3723376,9.7250832],[-13.3720288,9.7252168],[-13.371792,9.7259685],[-13.3716093,9.7261907],[-13.3717959,9.7269047],[-13.3719032,9.7279542],[-13.3721902,9.7284883],[-13.372909,9.7304181],[-13.3726951,9.7308345],[-13.3721534,9.7309573],[-13.3718744,9.7308621],[-13.3716384,9.7308336],[-13.3714882,9.7309362],[-13.3712521,9.7309182],[-13.3711441,9.7308292],[-13.3708437,9.7307472],[-13.3676854,9.7302198],[-13.3599969,9.7304432],[-13.354151,9.7295219],[-13.351155,9.7266668],[-13.3504818,9.7259239],[-13.3494813,9.7245704],[-13.3481697,9.7224475],[-13.3484942,9.7203484],[-13.3489717,9.7164886],[-13.3494384,9.714556],[-13.3500821,9.7113385],[-13.3506078,9.7095064],[-13.3507875,9.7083431],[-13.3508599,9.7076267],[-13.3518255,9.7073491],[-13.3523405,9.7073041],[-13.3517759,9.7072764],[-13.351442,9.7069948],[-13.3512448,9.7066908],[-13.3512502,9.706166],[-13.3511483,9.7056689],[-13.3510303,9.705279],[-13.3505555,9.704885],[-13.3503865,9.7045228],[-13.3502025,9.703879],[-13.3502192,9.7036702],[-13.350179,9.7033648],[-13.3500891,9.703146],[-13.3500556,9.7025003],[-13.3499577,9.7024025],[-13.3498169,9.7022121],[-13.3495634,9.7020958],[-13.3494682,9.7020231],[-13.3494347,9.7019094],[-13.3494427,9.7017574],[-13.3495084,9.7016681],[-13.349666,9.7015003],[-13.3497224,9.7012768],[-13.3499336,9.7009226],[-13.3502192,9.7004196],[-13.3503607,9.7002213],[-13.3503862,9.7002114],[-13.3498545,9.7001869],[-13.3489291,9.6999648],[-13.3483712,9.6994678],[-13.3478911,9.6992801],[-13.3475826,9.6990011],[-13.3469711,9.6991122],[-13.3463341,9.6990567],[-13.3455012,9.6981934],[-13.3451401,9.6967234],[-13.3447217,9.6960251],[-13.3446097,9.6957455],[-13.3443328,9.6954732],[-13.3438352,9.6945551],[-13.3441658,9.6943608],[-13.3454452,9.6941651],[-13.3458865,9.6939074],[-13.3466683,9.6935544],[-13.3483098,9.693331],[-13.3497502,9.6933349],[-13.3508687,9.6931076],[-13.352419,9.692941],[-13.3530855,9.6930005],[-13.3536387,9.6930005],[-13.3542784,9.6928617],[-13.3547009,9.6929172],[-13.3552279,9.6929159],[-13.3561372,9.6928339],[-13.3573321,9.6921928],[-13.359304,9.6916677],[-13.3592936,9.6916201],[-13.3594766,9.6911852],[-13.3595524,9.6911026],[-13.3596275,9.6910689],[-13.3602464,9.6908818],[-13.3609606,9.6907245],[-13.3616328,9.6904796],[-13.3616234,9.6904052],[-13.3615221,9.6901517],[-13.3614792,9.6898731],[-13.3614749,9.6894475],[-13.3614434,9.6891857],[-13.3615215,9.6891732],[-13.3618085,9.6892412],[-13.3620512,9.6893377],[-13.3621619,9.6893404],[-13.3620666,9.6886325],[-13.3618977,9.6881665],[-13.3618909,9.6880776],[-13.3619255,9.6878472],[-13.3620241,9.6875451],[-13.36225,9.6870818],[-13.362419,9.6868511],[-13.3627664,9.6864674],[-13.3630192,9.6861941],[-13.3632743,9.6857532],[-13.3633323,9.6856355],[-13.3633692,9.6854904],[-13.3634755,9.6855483],[-13.363512,9.6855245],[-13.3636535,9.6853497],[-13.3640679,9.6845525],[-13.3642503,9.6841189],[-13.3643321,9.6840012],[-13.3647157,9.6842484],[-13.3658784,9.6852796],[-13.3673663,9.6857416],[-13.3676882,9.6858004],[-13.3717397,9.6838155],[-13.3720035,9.6839533],[-13.3722771,9.6834546],[-13.374893,9.6846794],[-13.376395,9.6845485],[-13.3765954,9.6843465],[-13.3773096,9.6836231],[-13.3790262,9.6822509],[-13.3803325,9.6813982],[-13.380657,9.6811193],[-13.3811103,9.6805858],[-13.381811,9.6794938],[-13.3819948,9.6789677],[-13.3818872,9.67808],[-13.3820561,9.6770256],[-13.3822794,9.6759902],[-13.3825275,9.6750489],[-13.3824417,9.6747197],[-13.3824997,9.6742801],[-13.3824443,9.6740514],[-13.3825549,9.6733322],[-13.3827299,9.6733613],[-13.3836198,9.67336],[-13.3855764,9.6738108],[-13.3858889,9.673824],[-13.3863663,9.6739377],[-13.3866359,9.6739721],[-13.3870195,9.6739536],[-13.3894495,9.6741598],[-13.39008,9.6743621],[-13.3909235,9.6744983],[-13.391089,9.6731194],[-13.3912258,9.6726957],[-13.3912017,9.6724656],[-13.3913224,9.6716394],[-13.3913573,9.6711079],[-13.3914806,9.6701679],[-13.3915169,9.6696272],[-13.3916604,9.6691341],[-13.3917475,9.6690376],[-13.3929304,9.6687599],[-13.3928982,9.6685696],[-13.3928258,9.6683699],[-13.3928459,9.6682509],[-13.3929196,9.6681372],[-13.3930618,9.6681267],[-13.3931852,9.6682073],[-13.3936881,9.6683752],[-13.3938048,9.6684373],[-13.39401,9.6686224],[-13.3943278,9.6685325],[-13.3946872,9.6683633],[-13.3948321,9.6681227],[-13.394934,9.6680672],[-13.3950574,9.6680262],[-13.3951352,9.6682443],[-13.3951982,9.6689701],[-13.3951137,9.6692227],[-13.395052,9.6697753],[-13.3950252,9.6705685],[-13.3949702,9.6710815],[-13.3949689,9.67156],[-13.395052,9.6718006],[-13.3950829,9.6719765],[-13.395052,9.6721391],[-13.3951647,9.6727803],[-13.3953323,9.6732998],[-13.3954691,9.6740058],[-13.3959077,9.6753384],[-13.3961397,9.67617],[-13.3961679,9.6765309],[-13.3963047,9.6768045],[-13.3964764,9.6773148],[-13.3965823,9.6775621],[-13.3966292,9.6780552],[-13.3968063,9.6782284],[-13.3968532,9.6783434],[-13.3970477,9.6785192],[-13.3971617,9.6787466],[-13.3973011,9.6793269],[-13.3973226,9.6796178],[-13.3973655,9.6797262],[-13.3973736,9.6798782],[-13.3974379,9.6799681],[-13.3974782,9.6800911],[-13.3975774,9.6801863],[-13.3976726,9.680415],[-13.3976378,9.6805392],[-13.397568,9.6806291],[-13.3973199,9.6805908],[-13.3971402,9.6805842],[-13.3969417,9.6806106],[-13.3962135,9.6806648],[-13.3959627,9.6807759],[-13.3959185,9.6809847],[-13.3954974,9.6819009],[-13.3953807,9.6823398],[-13.3953927,9.6824984],[-13.3954464,9.6826663],[-13.3957441,9.6828792],[-13.39596,9.6831396],[-13.3961263,9.6835706],[-13.3957468,9.6838165],[-13.3957978,9.6840677],[-13.3956516,9.6843995],[-13.3958139,9.6845145],[-13.3959104,9.6844933],[-13.3960459,9.6843902],[-13.3962256,9.6842884],[-13.3963262,9.6841985],[-13.3964616,9.6842382],[-13.396538,9.6843083],[-13.3966655,9.6845224],[-13.3966561,9.6846744],[-13.3966735,9.6848146],[-13.3966024,9.6852257],[-13.396644,9.6853592],[-13.3967339,9.6854399],[-13.3966976,9.6855641],[-13.3966132,9.6856342],[-13.39653,9.6863957],[-13.3963744,9.6865755],[-13.3961652,9.6867169],[-13.3961223,9.6868253],[-13.3961786,9.6870924],[-13.3962081,9.6874149],[-13.3962712,9.6875114],[-13.3962417,9.6876502],[-13.3960003,9.6879292],[-13.3958192,9.6882517],[-13.3958729,9.68838],[-13.3958876,9.6885214],[-13.3959587,9.688643],[-13.3960499,9.6887171],[-13.3960928,9.6888334],[-13.3964066,9.6890053],[-13.3964629,9.6891071],[-13.3963972,9.6893833],[-13.3964053,9.6895288],[-13.3964844,9.6896239],[-13.3966292,9.6896808],[-13.3969417,9.6899082],[-13.3970477,9.6900298],[-13.3972116,9.6900838],[-13.3979986,9.6909308],[-13.3986165,9.6918284],[-13.3988117,9.6924456],[-13.3997549,9.6923574],[-13.4009095,9.6925578],[-13.4015925,9.6928784],[-13.4017876,9.6934555],[-13.4014867,9.6943932],[-13.4006411,9.6949061],[-13.3996817,9.695371],[-13.3992995,9.6956996],[-13.3992833,9.6963488],[-13.3992101,9.6971904],[-13.398771,9.6975029],[-13.3986572,9.697559],[-13.3973318,9.6984487],[-13.3966244,9.6986651],[-13.39573,9.6987452],[-13.3948844,9.698609],[-13.3947706,9.6984086],[-13.3948464,9.6982739],[-13.3943434,9.6983271],[-13.3939168,9.6987532],[-13.3933233,9.699715],[-13.3928842,9.7006287],[-13.3921524,9.7006367],[-13.3919248,9.7004523],[-13.3918597,9.7002039],[-13.391689,9.7004924],[-13.3917865,9.7010454],[-13.3912662,9.7015584],[-13.3899977,9.7015984],[-13.3887557,9.701691],[-13.3889202,9.70174],[-13.3891196,9.7021755],[-13.3902254,9.7025682],[-13.3904459,9.7026584],[-13.3911849,9.7029609],[-13.3922175,9.7033056],[-13.3925106,9.7030559],[-13.3938111,9.7028888],[-13.3940225,9.7031613],[-13.3939168,9.7039387],[-13.3936567,9.7041792],[-13.3932908,9.7042112],[-13.3934696,9.7046841],[-13.3937461,9.7047562],[-13.3938681,9.704644],[-13.393803,9.7044356],[-13.3938111,9.7043314],[-13.3953804,9.7041391],[-13.3952259,9.7037223],[-13.3952015,9.7034498],[-13.3950308,9.7031453],[-13.3949739,9.7030491],[-13.3951853,9.7027125],[-13.3955186,9.7025602],[-13.3958439,9.7026323],[-13.3968359,9.7030331],[-13.3972668,9.703017],[-13.3973806,9.703538],[-13.3969741,9.7037864],[-13.3969903,9.7042272],[-13.3965269,9.7044356],[-13.3964212,9.7046039],[-13.3964781,9.7047402],[-13.396647,9.7047426],[-13.3970473,9.7047482],[-13.3974619,9.70462],[-13.3978034,9.7043635],[-13.3980961,9.704652],[-13.3983807,9.7045879],[-13.3981834,9.7041087],[-13.3982142,9.7038353],[-13.3983726,9.7032975],[-13.3990393,9.7028487],[-13.3991938,9.7026003],[-13.3992751,9.7023518],[-13.4001614,9.7020152],[-13.4004216,9.7021755],[-13.4005354,9.702424],[-13.4003565,9.7033456],[-13.4002427,9.7037143],[-13.4006086,9.7046921],[-13.4008607,9.7057901],[-13.4011452,9.7057821],[-13.4009664,9.7048043],[-13.4012916,9.7037704],[-13.4019258,9.7036903],[-13.4023649,9.7038506],[-13.4025194,9.7037704],[-13.4024625,9.7034819],[-13.4024625,9.7028968],[-13.402682,9.7026884],[-13.4027426,9.7013205],[-13.4025901,9.7009656],[-13.4020397,9.7004203],[-13.4028251,9.6996936],[-13.4031536,9.6994104],[-13.404113,9.6990738],[-13.4044789,9.6992582],[-13.405536,9.6995226],[-13.406284,9.7001398],[-13.406902,9.7001157],[-13.4072922,9.7003962],[-13.4071865,9.6993784],[-13.4067312,9.6992742],[-13.4055685,9.6989776],[-13.4051294,9.6980079],[-13.4053571,9.6975204],[-13.4057054,9.6970567],[-13.4052514,9.6967095],[-13.4053571,9.6959],[-13.4053508,9.6953761],[-13.4053632,9.6950372],[-13.4053477,9.694573],[-13.4052889,9.694112],[-13.4051897,9.6936296],[-13.4051185,9.6931502],[-13.4053327,9.6922612],[-13.4062271,9.6909548],[-13.4070239,9.6891515],[-13.4076337,9.6892396],[-13.4087883,9.6891755],[-13.4096014,9.6885022],[-13.4098806,9.6881317],[-13.410447,9.6873801],[-13.4111056,9.6864183],[-13.4122846,9.6856168],[-13.4125164,9.6852329],[-13.4129188,9.6845669],[-13.4135205,9.6832203],[-13.4146263,9.6821143],[-13.4157891,9.6801105],[-13.4159917,9.6793926],[-13.4160493,9.6791887],[-13.4162525,9.6779303],[-13.417025,9.6767681],[-13.417481,9.6751706],[-13.4175535,9.6749166],[-13.4183666,9.6739147],[-13.4194317,9.6736983],[-13.4202204,9.6737945],[-13.4202855,9.674067],[-13.4197814,9.6757422],[-13.4202773,9.6754616],[-13.4207083,9.6747803],[-13.4214319,9.6743555],[-13.4223488,9.6739234],[-13.4227248,9.6737464],[-13.4238631,9.6734498],[-13.4242778,9.6736502],[-13.4243103,9.6741632],[-13.4241802,9.6745559],[-13.4246681,9.6747563],[-13.4252922,9.6745744],[-13.4265778,9.6741997],[-13.4274732,9.6739387],[-13.4284815,9.6738265],[-13.4294246,9.6739948],[-13.4296604,9.674596],[-13.4296035,9.6757181],[-13.4291319,9.6765116],[-13.4284896,9.6766639],[-13.4282375,9.6764315],[-13.4277009,9.6766559],[-13.427213,9.6770487],[-13.4262292,9.6771849],[-13.4252047,9.6777941],[-13.424675,9.678172],[-13.4239688,9.6786758],[-13.4234647,9.6795494],[-13.4231638,9.6800223],[-13.4231801,9.6805753],[-13.4232598,9.6807547],[-13.4232939,9.6808318],[-13.4237086,9.6804231],[-13.4244485,9.679862],[-13.4252779,9.6795093],[-13.4260422,9.6788521],[-13.4266927,9.6783391],[-13.4282131,9.6786998],[-13.4290018,9.6792769],[-13.4290831,9.6805673],[-13.4283839,9.6814971],[-13.4271155,9.6817696],[-13.4269402,9.6819424],[-13.4263306,9.6825433],[-13.4259202,9.6829478],[-13.4255067,9.6839155],[-13.4248115,9.6847144],[-13.4241702,9.6847295],[-13.4239628,9.6855624],[-13.4231196,9.6861461],[-13.4217165,9.6866989],[-13.4213832,9.6885022],[-13.4214889,9.6886465],[-13.4216921,9.6885263],[-13.4228711,9.6874683],[-13.4245623,9.6862741],[-13.4256682,9.6852562],[-13.4264988,9.6849914],[-13.4275789,9.684647],[-13.4288555,9.6846951],[-13.4300914,9.6853604],[-13.4307419,9.6865947],[-13.4309126,9.6884061],[-13.4302134,9.6895362],[-13.4298475,9.6909949],[-13.4289043,9.6918124],[-13.4250146,9.6930117],[-13.4227464,9.6926315],[-13.422532,9.692268],[-13.4211488,9.6920481],[-13.4200872,9.6929397],[-13.4193352,9.6934479],[-13.4184619,9.6929816],[-13.417807,9.6918757],[-13.4169579,9.6916784],[-13.4163939,9.6918876],[-13.4160119,9.6927066],[-13.4166668,9.6932745],[-13.4171581,9.6932147],[-13.4179283,9.6940098],[-13.417904,9.6944282],[-13.4168306,9.694763],[-13.4173582,9.6954206],[-13.4186075,9.6952711],[-13.4188464,9.6957416],[-13.4187166,9.6960662],[-13.4177404,9.6963959],[-13.4176614,9.6972199],[-13.4180623,9.698363],[-13.4175565,9.6997457],[-13.4160697,9.7011442],[-13.414812,9.7020174],[-13.413858,9.701993],[-13.4130949,9.7021994],[-13.4125006,9.7024684],[-13.4122844,9.7029456],[-13.4129768,9.7036719],[-13.4115177,9.705237],[-13.4103977,9.706229]]]]}]}
