# Supplementary material
Source: ML conference proceedings conference paper supplement (https://proceedings.neurips.cc/paper_files/paper/2022/hash/9d3faa41886997cfc2128b930077fa49-Abstract.html)
Supplement: Supplementary file 1 [file 9d3faa41886997cfc2128b930077fa49-Supplemental-Conference.zip › code/ebola/map/geojson/dalaba.geojson]

{"type":"GeometryCollection","geometries":[{"type":"MultiPolygon","coordinates":[[[[-12.494707,10.6246246],[-12.4914317,10.626962],[-12.4871762,10.6321901],[-12.4820807,10.6338411],[-12.4788331,10.628613],[-12.4737376,10.6290533],[-12.4689781,10.6455078],[-12.4648905,10.6510108],[-12.4599631,10.6605307],[-12.4533558,10.6646027],[-12.4491002,10.6726365],[-12.4490442,10.6791295],[-12.4545389,10.6981114],[-12.4539708,10.6995135],[-12.452294,10.7014308],[-12.4514914,10.7021982],[-12.4505507,10.7035198],[-12.4503669,10.7043892],[-12.4497044,10.705803],[-12.4489271,10.7069976],[-12.448505,10.70727],[-12.4472175,10.7075283],[-12.4463071,10.7080063],[-12.445784,10.7085403],[-12.4452024,10.7089027],[-12.4451183,10.7095559],[-12.4455643,10.7102167],[-12.4465557,10.7106527],[-12.4471616,10.7109166],[-12.4472034,10.7114796],[-12.4469741,10.7120241],[-12.4464176,10.7126417],[-12.4447954,10.7136867],[-12.4424444,10.7154393],[-12.4422324,10.7160428],[-12.4423478,10.7169717],[-12.4434207,10.7177658],[-12.4436329,10.7179194],[-12.4435673,10.7183062],[-12.4428821,10.7187775],[-12.4429035,10.7195146],[-12.4428447,10.71985],[-12.4421879,10.7202274],[-12.441054,10.7201768],[-12.439771,10.7191815],[-12.4391269,10.7191227],[-12.4383935,10.7196737],[-12.4376738,10.7209545],[-12.4373361,10.7212802],[-12.4358051,10.7216498],[-12.4351445,10.7216092],[-12.4345592,10.7219069],[-12.4330444,10.7221852],[-12.4320011,10.7217459],[-12.4314208,10.7210684],[-12.4308183,10.7209278],[-12.4299866,10.7213328],[-12.4294129,10.72183],[-12.4289944,10.7232996],[-12.4286677,10.7241084],[-12.4279966,10.7245936],[-12.4274441,10.7245875],[-12.4266631,10.7242479],[-12.4263781,10.7237745],[-12.4254236,10.7234008],[-12.4245306,10.7235934],[-12.4238264,10.7245396],[-12.4238887,10.725068],[-12.4244212,10.7255155],[-12.424208,10.725903],[-12.4238175,10.725953],[-12.4228882,10.7254486],[-12.4219806,10.7245503],[-12.4215302,10.7240165],[-12.4209855,10.724009],[-12.4198069,10.7245914],[-12.4194425,10.7254006],[-12.4195313,10.7257293],[-12.419232,10.726535],[-12.4182002,10.7285398],[-12.4172044,10.7303615],[-12.4166647,10.7307011],[-12.4164818,10.7306182],[-12.416355,10.7302558],[-12.4165388,10.7296139],[-12.4161927,10.7288399],[-12.4155594,10.728591],[-12.4145782,10.7287517],[-12.4137118,10.7285579],[-12.4131374,10.7291802],[-12.4126444,10.7303879],[-12.4123782,10.7306561],[-12.4122501,10.7310526],[-12.4125253,10.7317286],[-12.4132522,10.7325213],[-12.4132808,10.7329429],[-12.412847,10.7332971],[-12.4120734,10.7336164],[-12.4115378,10.7335964],[-12.4104564,10.7340787],[-12.4102766,10.7345285],[-12.4109743,10.7355499],[-12.4117176,10.7373527],[-12.4118899,10.7383558],[-12.4116447,10.7385601],[-12.4107489,10.7385475],[-12.4096519,10.7381203],[-12.4090296,10.7379346],[-12.4089677,10.7381345],[-12.4073376,10.7434121],[-12.4014582,10.7538643],[-12.3873398,10.7807643],[-12.3786292,10.7927437],[-12.3753033,10.8081451],[-12.3711855,10.8140565],[-12.3610495,10.8165455],[-12.3479044,10.8297679],[-12.3341257,10.8364567],[-12.332542,10.8397233],[-12.3266821,10.854189],[-12.3265237,10.8656988],[-12.3304831,10.8801633],[-12.3311166,10.8884062],[-12.3336506,10.897893],[-12.3328587,10.9260406],[-12.3384019,10.9370812],[-12.3311166,10.9751758],[-12.3241481,10.9859036],[-12.3100527,10.9991185],[-12.3037177,11.0157529],[-12.3000751,11.033319],[-12.302134,11.0529048],[-12.2994416,11.0637852],[-12.2943736,11.067671],[-12.2809117,11.0623863],[-12.2764772,11.0460655],[-12.2753686,11.0386042],[-12.2612732,11.0322309],[-12.2368834,11.0513504],[-12.2131272,11.0538374],[-12.2187566,11.0575754],[-12.2276977,11.0636298],[-12.2352997,11.0846123],[-12.2265891,11.0898965],[-12.2137607,11.0830581],[-12.2143942,11.088964],[-12.1980356,11.1047534],[-12.1950724,11.1076136],[-12.1930135,11.1142961],[-12.1990318,11.1447538],[-12.2002349,11.1587473],[-12.1799629,11.170556],[-12.1527224,11.1888896],[-12.1383103,11.2179414],[-12.128491,11.2595719],[-12.1227895,11.2729298],[-12.1126535,11.2820935],[-12.095549,11.2861316],[-12.0436019,11.2945184],[-12.0336243,11.2923441],[-12.0333859,11.2923232],[-12.0332363,11.29231],[-12.0264101,11.2917105],[-12.0202263,11.2920246],[-12.0163233,11.2890309],[-12.012546,11.2861333],[-11.9999829,11.2874056],[-11.9990308,11.287502],[-11.9949561,11.2789974],[-11.9904051,11.2617821],[-11.9750185,11.2560435],[-11.9674335,11.2350008],[-11.9546474,11.2173577],[-11.9091376,11.2077917],[-11.8900669,11.1969499],[-11.8742468,11.1793046],[-11.865795,11.1599572],[-11.8688289,11.1486884],[-11.8770641,11.1433727],[-11.8887666,11.1106263],[-11.8902836,11.0861703],[-11.8766306,11.0551189],[-11.8616774,11.0321473],[-11.8576084,11.0291872],[-11.8432568,11.0187464],[-11.8207186,11.0085357],[-11.7723915,10.998112],[-11.7511536,10.9972611],[-11.7359723,10.9891771],[-11.7380935,10.9726922],[-11.7371976,10.9410276],[-11.7398853,10.9181566],[-11.7475025,10.9028856],[-11.7475418,10.9028069],[-11.7506361,10.8966034],[-11.7595952,10.8886856],[-11.7596348,10.8885817],[-11.7663145,10.8710895],[-11.7670359,10.8709832],[-11.767093,10.8709748],[-11.7842326,10.86845],[-11.7999946,10.8550342],[-11.8009668,10.8542068],[-11.8043904,10.8512928],[-11.810069,10.8483491],[-11.8135548,10.8465424],[-11.8205167,10.8429337],[-11.8505295,10.8455735],[-11.8567618,10.8420194],[-11.8644161,10.8376542],[-11.8874583,10.8534598],[-11.8926371,10.857012],[-11.9065236,10.8702097],[-11.9110415,10.8695442],[-11.9334007,10.8662504],[-11.9459434,10.86845],[-11.9773001,10.8671303],[-11.9938743,10.8618512],[-12.0037293,10.8499729],[-12.0086567,10.8270949],[-12.0337421,10.8020151],[-12.0547958,10.8037752],[-12.0691303,10.8169753],[-12.0767455,10.8196152],[-12.0892882,10.8134553],[-12.1058624,10.7958549],[-12.1134776,10.7800136],[-12.1390109,10.7826539],[-12.1708155,10.7707724],[-12.1784307,10.7835339],[-12.1950049,10.7725327],[-12.2017242,10.7553699],[-12.2048599,10.7091577],[-12.2178505,10.6444486],[-12.2353207,10.6281592],[-12.260406,10.6189134],[-12.2863872,10.5938164],[-12.2917627,10.5784049],[-12.2971381,10.5290829],[-12.3092328,10.4956099],[-12.316848,10.4859197],[-12.3410374,10.4788721],[-12.3608593,10.4832769],[-12.3808668,10.4798443],[-12.3888231,10.4790678],[-12.4032891,10.4851898],[-12.408517,10.4916022],[-12.4103588,10.5009234],[-12.4148464,10.5036139],[-12.4291453,10.4980754],[-12.438119,10.4986565],[-12.4413889,10.5117262],[-12.4346799,10.5242805],[-12.4375112,10.5343441],[-12.4468379,10.5356235],[-12.4541959,10.5424318],[-12.4684077,10.5442449],[-12.4786624,10.5401062],[-12.4822987,10.5437861],[-12.4841384,10.5515524],[-12.4918497,10.5589196],[-12.4990961,10.5597703],[-12.504583,10.5660103],[-12.505015,10.5868173],[-12.4992929,10.5965807],[-12.4931123,10.6030821],[-12.4936543,10.6195977],[-12.494707,10.6246246]]]]}]}
