# Supplementary material
Source: ML conference proceedings conference paper supplement (https://proceedings.neurips.cc/paper_files/paper/2022/hash/9d3faa41886997cfc2128b930077fa49-Abstract.html)
Supplement: Supplementary file 1 [file 9d3faa41886997cfc2128b930077fa49-Supplemental-Conference.zip › code/ebola/map/geojson/dinguiraye.geojson]

{"type":"GeometryCollection","geometries":[{"type":"MultiPolygon","coordinates":[[[[-11.5958675,10.9206688],[-11.5951512,10.9239846],[-11.5937618,10.9266126],[-11.5930864,10.9297879],[-11.5925879,10.9310727],[-11.5927376,10.9317447],[-11.5856714,10.9366512],[-11.5668855,10.9372134],[-11.5444349,10.963945],[-11.5410912,10.9737928],[-11.5344038,10.9789511],[-11.5296271,10.9770754],[-11.5186406,10.9625381],[-11.500489,10.9756686],[-11.4871142,10.9672276],[-11.4680072,10.9709792],[-11.4646635,10.9780132],[-11.471351,10.9892674],[-11.4541547,10.9991144],[-11.452244,11.0113055],[-11.4436459,11.0216207],[-11.4283604,11.0136499],[-11.4207176,11.0159943],[-11.4235837,11.0267781],[-11.4092535,11.0328731],[-11.3944456,11.0291224],[-11.3786824,11.0455317],[-11.3700843,11.0689719],[-11.3614862,11.0764724],[-11.3600532,11.1116284],[-11.3696066,11.1322513],[-11.370562,11.1467802],[-11.3825038,11.1622456],[-11.398267,11.1706809],[-11.4082981,11.1945797],[-11.4168962,11.2081684],[-11.4221506,11.2243333],[-11.4228672,11.2353437],[-11.4322749,11.241343],[-11.4300929,11.2454585],[-11.4300929,11.25268],[-11.4295726,11.2550785],[-11.4254632,11.2572865],[-11.4258412,11.2630968],[-11.4223119,11.2664118],[-11.4182614,11.2683116],[-11.4141115,11.2644112],[-11.4100124,11.2642437],[-11.4050519,11.2617274],[-11.3972453,11.2635582],[-11.3939719,11.2672754],[-11.3901683,11.2672754],[-11.3860484,11.269464],[-11.3825456,11.269464],[-11.3763167,11.2659005],[-11.3718675,11.2610335],[-11.3667173,11.259855],[-11.3626001,11.2553121],[-11.3578708,11.2544839],[-11.3523847,11.2561653],[-11.3499374,11.2559938],[-11.3453118,11.2543136],[-11.3430606,11.2544713],[-11.3430606,11.2568318],[-11.3461338,11.2608505],[-11.3475238,11.2640883],[-11.3475238,11.2669996],[-11.3469216,11.2686248],[-11.3451141,11.2693863],[-11.3408338,11.2678019],[-11.3347078,11.2651288],[-11.3331708,11.2652682],[-11.332398,11.2658617],[-11.3308764,11.2683533],[-11.3317331,11.2765863],[-11.3305169,11.2803347],[-11.3196948,11.2954959],[-11.3178219,11.2988351],[-11.3161033,11.3113064],[-11.3136504,11.3140552],[-11.309163,11.3155783],[-11.3042359,11.3180773],[-11.3018429,11.3236083],[-11.2990647,11.3266728],[-11.2952914,11.3285227],[-11.2932836,11.3309835],[-11.294315,11.3409267],[-11.2925356,11.3424969],[-11.2878984,11.3448544],[-11.2827487,11.3490619],[-11.2784242,11.3512667],[-11.2688131,11.3526128],[-11.2658085,11.3542494],[-11.2656439,11.3569929],[-11.2704504,11.3635566],[-11.2699276,11.3721012],[-11.2676733,11.3729512],[-11.2627087,11.3867128],[-11.2606112,11.3894545],[-11.2552734,11.3911425],[-11.2533857,11.3926565],[-11.24672,11.3948347],[-11.2453589,11.3975032],[-11.2412335,11.4008731],[-11.2400343,11.4027204],[-11.2364345,11.4060812],[-11.2341945,11.4104727],[-11.2297062,11.4128417],[-11.2243581,11.4172385],[-11.2210167,11.4172385],[-11.2169145,11.415228],[-11.2139225,11.4160426],[-11.2120352,11.4189017],[-11.2028695,11.4216139],[-11.1977148,11.4214455],[-11.1908454,11.4229605],[-11.184187,11.4224585],[-11.1812014,11.4250598],[-11.1835908,11.4334238],[-11.1827196,11.4378637],[-11.179929,11.4409408],[-11.1762478,11.4424871],[-11.1707754,11.4404757],[-11.1682753,11.442436],[-11.1625729,11.4507349],[-11.1553261,11.4493821],[-11.1466383,11.4543908],[-11.1438999,11.4580811],[-11.1402468,11.4613203],[-11.1362204,11.4613203],[-11.1318379,11.4595031],[-11.1262487,11.4684667],[-11.1252234,11.4786824],[-11.1264259,11.48609],[-11.1253842,11.4915349],[-11.1227458,11.4941205],[-11.1207051,11.4942871],[-11.119741,11.4958617],[-11.1207681,11.4990489],[-11.1193668,11.5021387],[-11.1149242,11.5073292],[-11.1150958,11.5127115],[-11.110077,11.5186487],[-11.108805,11.5195149],[-11.1093976,11.52048],[-11.1098214,11.5216577],[-11.1099533,11.5231612],[-11.1097579,11.5241251],[-11.1080583,11.5289213],[-11.1075783,11.530071],[-11.1075721,11.530771],[-11.1078954,11.5312605],[-11.1088798,11.5315124],[-11.1104254,11.5311915],[-11.1123188,11.5299896],[-11.1131818,11.5291376],[-11.1137803,11.5279438],[-11.1144765,11.5279759],[-11.1155625,11.5285989],[-11.1160244,11.5292885],[-11.1161103,11.53006],[-11.1160208,11.5324672],[-11.1157249,11.5331106],[-11.1151677,11.5337825],[-11.1137154,11.5345261],[-11.1137258,11.5346618],[-11.1142684,11.5352484],[-11.1148019,11.5355098],[-11.1154429,11.5355164],[-11.1158957,11.5356622],[-11.1164323,11.5353077],[-11.1173553,11.5343242],[-11.1184612,11.5333565],[-11.1195912,11.5330411],[-11.1212246,11.5333168],[-11.1225752,11.5333304],[-11.123174,11.533714],[-11.1233977,11.5343221],[-11.1238669,11.5353598],[-11.1243878,11.5361915],[-11.1245992,11.5362697],[-11.1248405,11.5361641],[-11.1251967,11.535755],[-11.1256888,11.534204],[-11.125971,11.532973],[-11.1262093,11.5310452],[-11.1265973,11.5299523],[-11.1272216,11.5288172],[-11.1279706,11.5280697],[-11.1292089,11.5269995],[-11.1300425,11.5268483],[-11.1316737,11.5282878],[-11.1320949,11.529037],[-11.1337937,11.5293334],[-11.1345935,11.5291244],[-11.1357217,11.5290835],[-11.1381867,11.5295288],[-11.1394545,11.5302523],[-11.1398548,11.5306264],[-11.1418126,11.5301827],[-11.1434257,11.5306431],[-11.1442241,11.5311717],[-11.1446763,11.5320381],[-11.1454068,11.5324566],[-11.1465805,11.5323618],[-11.1483168,11.5317137],[-11.1492619,11.5320314],[-11.150443,11.5318793],[-11.1511712,11.5320595],[-11.1519662,11.5327643],[-11.1518501,11.5332404],[-11.1520249,11.5336082],[-11.1520645,11.5345275],[-11.1525606,11.5350196],[-11.1535499,11.5354625],[-11.1557719,11.5359507],[-11.1578157,11.5363228],[-11.1581607,11.5366447],[-11.1584122,11.5380302],[-11.1589558,11.538589],[-11.1593557,11.5398842],[-11.1595073,11.5400374],[-11.1600194,11.5400032],[-11.1616587,11.5392959],[-11.1625702,11.5391075],[-11.1636697,11.5393769],[-11.1643662,11.5393832],[-11.165124,11.5392387],[-11.1674239,11.5389672],[-11.1677608,11.5391549],[-11.1682,11.5390419],[-11.1688309,11.5380554],[-11.1689933,11.5372993],[-11.1693495,11.5367151],[-11.1703401,11.5365838],[-11.1710077,11.5367455],[-11.1719015,11.5377148],[-11.1731506,11.5381674],[-11.1736554,11.5381674],[-11.1748509,11.5382789],[-11.1752109,11.5375415],[-11.1760677,11.5373334],[-11.1778099,11.5376928],[-11.1790634,11.5388738],[-11.1797441,11.5393247],[-11.1810503,11.5395861],[-11.1813608,11.5398709],[-11.18203,11.5399024],[-11.1830588,11.5401478],[-11.1838143,11.5401604],[-11.184784,11.5398371],[-11.1866911,11.5396673],[-11.187283,11.5398485],[-11.1882109,11.5387677],[-11.1886413,11.5385244],[-11.1891791,11.538749],[-11.189332,11.5394309],[-11.1893671,11.5404698],[-11.1886206,11.5426376],[-11.1886271,11.5436521],[-11.1888908,11.5448445],[-11.1889314,11.5454743],[-11.1891008,11.5461647],[-11.1891853,11.5473053],[-11.1902246,11.5480651],[-11.1917457,11.5484512],[-11.1926673,11.550035],[-11.1929273,11.5517107],[-11.1933111,11.5529489],[-11.1938738,11.5536862],[-11.1947229,11.5544845],[-11.195057,11.5551199],[-11.1962886,11.5556352],[-11.1975467,11.5556083],[-11.1980338,11.5559642],[-11.1980589,11.5564887],[-11.1972452,11.5578891],[-11.1961255,11.5586569],[-11.1954283,11.5589674],[-11.194282,11.559178],[-11.1940724,11.5595671],[-11.1941552,11.5605408],[-11.1947763,11.5617642],[-11.1953776,11.5619468],[-11.196207,11.561905],[-11.1968513,11.5608899],[-11.197193,11.5596045],[-11.1976943,11.5590277],[-11.1982708,11.5591772],[-11.1999381,11.5607971],[-11.2014101,11.5628052],[-11.2022674,11.5631997],[-11.2034637,11.5636054],[-11.2046792,11.5634194],[-11.2047392,11.56334],[-11.2046119,11.5630108],[-11.2029969,11.5620773],[-11.2027084,11.5614973],[-11.2027012,11.5605465],[-11.2030069,11.55994],[-11.2041059,11.5594304],[-11.2055257,11.55971],[-11.2058606,11.5603138],[-11.2061496,11.5603405],[-11.20625,11.5604892],[-11.2061248,11.561203],[-11.2058664,11.5618675],[-11.2062083,11.5626211],[-11.2072835,11.5630506],[-11.2074359,11.5636265],[-11.2081683,11.5647986],[-11.2081142,11.5651168],[-11.2074653,11.5656984],[-11.2071952,11.5662999],[-11.2074006,11.5668534],[-11.2074574,11.5672511],[-11.207017,11.5677034],[-11.2068357,11.5682661],[-11.2071261,11.5688293],[-11.2080055,11.5697644],[-11.2073978,11.570111],[-11.2073674,11.5704539],[-11.207855,11.5708617],[-11.2090796,11.5710766],[-11.2091386,11.5714931],[-11.2080111,11.5718097],[-11.207634,11.5722377],[-11.207634,11.5724551],[-11.2082474,11.5727846],[-11.2084383,11.5734505],[-11.2082716,11.5740835],[-11.2082784,11.5750648],[-11.2078989,11.5761394],[-11.2073368,11.5814814],[-11.1893499,11.5890449],[-11.1684077,11.6012777],[-11.1571289,11.6177322],[-11.1441702,11.6283097],[-11.1494497,11.6386517],[-11.1633682,11.6457028],[-11.1648081,11.6541639],[-11.1451301,11.6811908],[-11.1352912,11.6880059],[-11.1204127,11.6917658],[-11.0997749,11.6915308],[-11.0870562,11.70845],[-11.079137,11.7279528],[-11.0709779,11.7498037],[-11.0764973,11.7857482],[-11.0714578,11.8090039],[-11.0767373,11.8522213],[-11.0726577,11.867017],[-11.05082,11.8792287],[-11.0532198,11.8867434],[-11.0726334,11.8904804],[-11.0732691,11.8906028],[-11.0737276,11.8906911],[-11.0752177,11.8909779],[-11.0766841,11.8912602],[-11.0824967,11.8923792],[-11.1028946,11.9182086],[-11.1204127,11.917739],[-11.1292918,11.9144518],[-11.1470499,11.9245482],[-11.1612085,11.9376965],[-11.1537692,11.9585915],[-11.1520894,11.9874663],[-11.1537692,12.0102353],[-11.1645681,12.0259612],[-11.1705141,12.033309],[-11.1688041,12.033737],[-11.1673791,12.034236],[-11.1649571,12.035304],[-11.1628911,12.037442],[-11.1616801,12.038867],[-11.1607531,12.040648],[-11.1603261,12.042144],[-11.1598981,12.043355],[-11.1594001,12.044352],[-11.1585451,12.045421],[-11.1576901,12.046347],[-11.1569061,12.046419],[-11.1557661,12.046062],[-11.1545551,12.045421],[-11.1524181,12.045136],[-11.1514911,12.045492],[-11.1500671,12.046846],[-11.1480001,12.049126],[-11.1474301,12.049553],[-11.1467181,12.05048],[-11.1434401,12.055752],[-11.1416591,12.059457],[-11.1378121,12.066296],[-11.1383101,12.067508],[-11.1393081,12.068434],[-11.1406611,12.069146],[-11.1420861,12.070642],[-11.1426561,12.071711],[-11.1429411,12.073279],[-11.1430131,12.07563],[-11.1427991,12.077838],[-11.1429411,12.079192],[-11.1440811,12.081187],[-11.1452211,12.082897],[-11.1457201,12.084108],[-11.1457911,12.085889],[-11.1442241,12.088739],[-11.1437961,12.090021],[-11.1438681,12.091589],[-11.1445091,12.092444],[-11.1451501,12.092942],[-11.1444371,12.094011],[-11.1429411,12.096718],[-11.1426561,12.098571],[-11.1421581,12.100352],[-11.1412311,12.101563],[-11.1399491,12.102276],[-11.1384531,12.102489],[-11.1370991,12.103202],[-11.1355321,12.103701],[-11.1335371,12.103701],[-11.1312571,12.102632],[-11.1289061,12.102774],[-11.1269111,12.103059],[-11.1251301,12.102703],[-11.1239191,12.102917],[-11.1228501,12.103914],[-11.1219951,12.104057],[-11.1211401,12.103416],[-11.1201431,12.101777],[-11.1182191,12.100209],[-11.1171501,12.09964],[-11.1165801,12.099141],[-11.1152981,12.098785],[-11.1135881,12.099426],[-11.1112371,12.100779],[-11.1091711,12.102276],[-11.1074611,12.103914],[-11.1067481,12.105197],[-11.1066061,12.106479],[-11.1066061,12.108831],[-11.1066771,12.109971],[-11.1078171,12.111396],[-11.1091711,12.113319],[-11.1097411,12.114459],[-11.1103111,12.115741],[-11.1105961,12.116525],[-11.1105961,12.117665],[-11.1099541,12.118449],[-11.1081021,12.119446],[-11.1066771,12.120159],[-11.1046111,12.122794],[-11.1038981,12.124006],[-11.1038271,12.125787],[-11.1038271,12.127354],[-11.1020461,12.128423],[-11.1010491,12.130845],[-11.0994811,12.132128],[-11.0977711,12.13284],[-11.0953491,12.133553],[-11.0937821,12.133553],[-11.0928551,12.133909],[-11.0909321,12.133624],[-11.0892221,12.133197],[-11.0876541,12.132413],[-11.0856601,12.132627],[-11.0844481,12.13341],[-11.0841631,12.134265],[-11.0845201,12.135548],[-11.0846621,12.136545],[-11.0842351,12.1374],[-11.0835221,12.138113],[-11.0818121,12.137471],[-11.0804591,12.136616],[-11.0786771,12.13569],[-11.0772531,12.135405],[-11.0754711,12.135405],[-11.0741891,12.135975],[-11.0736191,12.137044],[-11.0736901,12.138113],[-11.0741891,12.139181],[-11.0740461,12.14025],[-11.0731201,12.140963],[-11.0719091,12.140464],[-11.0712681,12.14025],[-11.0698431,12.140108],[-11.0689881,12.140321],[-11.0677771,12.141176],[-11.0672781,12.142316],[-11.0672071,12.143171],[-11.0676341,12.144311],[-11.0682751,12.145237],[-11.0691301,12.145807],[-11.0699851,12.146306],[-11.0705551,12.147161],[-11.0711251,12.147873],[-11.0711961,12.148871],[-11.0706261,12.150367],[-11.0706981,12.151792],[-11.0708401,12.153003],[-11.0704841,12.154143],[-11.0708401,12.154998],[-11.0714101,12.155497],[-11.0713391,12.156565],[-11.0706981,12.15799],[-11.0701281,12.158703],[-11.070057,12.160056],[-11.0697,12.161268],[-11.068632,12.163619],[-11.0690591,12.164759],[-11.0680621,12.165685],[-11.0656391,12.167395],[-11.0650691,12.167965],[-11.0640721,12.16825],[-11.0629321,12.169247],[-11.0617921,12.170601],[-11.0610081,12.171171],[-11.0605101,12.170957],[-11.0597971,12.169176],[-11.0589421,12.167822],[-11.0581581,12.167395],[-11.0576601,12.166611],[-11.0574461,12.165471],[-11.0571611,12.164901],[-11.0562351,12.164759],[-11.0553091,12.165257],[-11.0548101,12.166326],[-11.0546671,12.167466],[-11.0549521,12.168748],[-11.0557361,12.170886],[-11.0568761,12.173379],[-11.0570901,12.174306],[-11.0569471,12.176015],[-11.0574461,12.177512],[-11.058728,12.179293],[-11.059726,12.181359],[-11.060581,12.182428],[-11.06165,12.184137],[-11.061436,12.185206],[-11.060153,12.186132],[-11.059156,12.187201],[-11.057802,12.188768],[-11.056092,12.191048],[-11.052388,12.195466],[-11.0519601,12.197104],[-11.0521741,12.197817],[-11.0530291,12.198672],[-11.0540971,12.199384],[-11.0544541,12.200097],[-11.0551661,12.201735],[-11.0553091,12.202377],[-11.0548811,12.203303],[-11.0519601,12.205155],[-11.0511761,12.206438],[-11.0498231,12.209003],[-11.0496801,12.210071],[-11.0491811,12.21171],[-11.0484691,12.213135],[-11.0482551,12.214132],[-11.0481841,12.215842],[-11.0476141,12.216769],[-11.0472581,12.217481],[-11.0473291,12.219048],[-11.0478991,12.220545],[-11.0474721,12.221613],[-11.0460471,12.221685],[-11.0451201,12.221613],[-11.0439091,12.222183],[-11.040677,12.2210457],[-11.0393801,12.2219446],[-11.037811,12.2242452],[-11.0366899,12.2250924],[-11.0364658,12.2250108],[-11.036172,12.2246453],[-11.0361849,12.2242423],[-11.0364824,12.2237072],[-11.0364377,12.2235672],[-11.0343395,12.2216279],[-11.0337663,12.2208206],[-11.0331056,12.2193655],[-11.0326284,12.2172148],[-11.0323818,12.2136916],[-11.0320599,12.2122865],[-11.0317701,12.2121081],[-11.0312122,12.2119246],[-11.0307455,12.2118984],[-11.0303057,12.2120663],[-11.029206,12.2129838],[-11.0283531,12.2139433],[-11.0271783,12.2148188],[-11.0260034,12.216001],[-11.0257512,12.2166407],[-11.0255447,12.2168006],[-11.025121,12.2169737],[-11.0242681,12.2169213],[-11.0226023,12.2165463],[-11.02172,12.2164599],[-11.0196948,12.2169054],[-11.0187132,12.2170235],[-11.0170556,12.2173722],[-11.0161951,12.217267],[-11.0137886,12.2175515],[-11.0128649,12.2170154],[-11.0109117,12.2156464],[-11.0077087,12.2139744],[-11.0044412,12.2146757],[-11.0005921,12.214132],[-10.9886131,12.214433],[-10.9868151,12.214808],[-10.9853171,12.215407],[-10.9842681,12.216306],[-10.9838181,12.217205],[-10.9835181,12.218404],[-10.9833681,12.220352],[-10.9830691,12.222375],[-10.9824691,12.223424],[-10.9814951,12.224323],[-10.9789481,12.225072],[-10.9774491,12.225297],[-10.9764751,12.225747],[-10.973778,12.229043],[-10.973178,12.229268],[-10.972429,12.229193],[-10.971829,12.228519],[-10.97078,12.227695],[-10.9662851,12.226871],[-10.9614141,12.226571],[-10.9596161,12.226046],[-10.9581181,12.225672],[-10.9557951,12.225597],[-10.9544461,12.225747],[-10.9533231,12.226196],[-10.9523491,12.227095],[-10.951225,12.22777],[-10.949352,12.227994],[-10.947703,12.22777],[-10.9469541,12.22747],[-10.9469541,12.226571],[-10.9472541,12.225072],[-10.9473291,12.224473],[-10.9468791,12.224323],[-10.9457551,12.224323],[-10.9444061,12.224473],[-10.9436571,12.224923],[-10.9432821,12.225447],[-10.9428331,12.226271],[-10.942383,12.22762],[-10.942009,12.22777],[-10.9415591,12.227395],[-10.9402101,12.226646],[-10.9396861,12.226571],[-10.9390121,12.226571],[-10.9385621,12.22702],[-10.938038,12.227695],[-10.937738,12.228294],[-10.937588,12.229493],[-10.937213,12.230467],[-10.936614,12.231366],[-10.935715,12.231741],[-10.934141,12.231666],[-10.933092,12.231291],[-10.931818,12.230317],[-10.929121,12.227545],[-10.9278471,12.226946],[-10.9266481,12.226571],[-10.9242511,12.226121],[-10.9231271,12.226196],[-10.9226021,12.226046],[-10.9224521,12.225747],[-10.9223781,12.224548],[-10.9220031,12.223124],[-10.9217031,12.2223],[-10.9206541,12.221251],[-10.9190061,12.220277],[-10.9175071,12.219753],[-10.9121121,12.219828],[-10.9117381,12.219528],[-10.9118131,12.218928],[-10.9132361,12.215931],[-10.9135361,12.215182],[-10.9133861,12.214583],[-10.9128621,12.213908],[-10.9118131,12.213759],[-10.9104641,12.213009],[-10.9100151,12.212485],[-10.9096401,12.211661],[-10.9097151,12.210762],[-10.9100891,12.209863],[-10.9106141,12.209038],[-10.9108075,12.208394],[-10.9108391,12.208289],[-10.9105391,12.207914],[-10.9097151,12.207765],[-10.9085161,12.208214],[-10.9063431,12.209263],[-10.9053691,12.209113],[-10.9049191,12.208589],[-10.9043951,12.208214],[-10.9037211,12.208214],[-10.9030461,12.208139],[-10.9031211,12.20754],[-10.9032711,12.20709],[-10.9032711,12.206341],[-10.9025221,12.206041],[-10.9016981,12.206041],[-10.9009481,12.206491],[-10.9004241,12.20739],[-10.8989251,12.209563],[-10.8981011,12.210162],[-10.8966781,12.210237],[-10.8956291,12.209863],[-10.8945801,12.208514],[-10.8945051,12.207765],[-10.8945801,12.207015],[-10.8948791,12.205517],[-10.8956291,12.203719],[-10.8955541,12.203119],[-10.8951791,12.202745],[-10.8938301,12.202445],[-10.8925571,12.20222],[-10.8921071,12.201846],[-10.8920321,12.201471],[-10.8919571,12.200722],[-10.8922571,12.199972],[-10.8927061,12.199373],[-10.8930061,12.198848],[-10.8930811,12.198249],[-10.8927811,12.19735],[-10.8926311,12.196601],[-10.893006,12.195177],[-10.893006,12.194578],[-10.892482,12.193903],[-10.891283,12.193304],[-10.8900091,12.19248],[-10.889335,12.191506],[-10.889035,12.189932],[-10.889036,12.188658],[-10.888511,12.187609],[-10.886488,12.185137],[-10.885214,12.184238],[-10.883716,12.183863],[-10.883191,12.183638],[-10.882892,12.183189],[-10.882742,12.181915],[-10.882742,12.180716],[-10.882592,12.180042],[-10.881918,12.179442],[-10.881168,12.178393],[-10.880644,12.178019],[-10.880569,12.177494],[-10.8806441,12.17652],[-10.8811681,12.175771],[-10.8818431,12.174197],[-10.8822921,12.173448],[-10.8822921,12.172699],[-10.8819921,12.172174],[-10.8819181,12.17135],[-10.8819921,12.170751],[-10.8819921,12.170001],[-10.8816931,12.169552],[-10.8803441,12.169027],[-10.8787711,12.169027],[-10.8780211,12.169103],[-10.8770471,12.168878],[-10.8767481,12.168203],[-10.8772721,12.16693],[-10.8777221,12.165581],[-10.8780211,12.165056],[-10.876298,12.163708],[-10.875624,12.162659],[-10.875024,12.16131],[-10.875174,12.160186],[-10.8745751,12.159512],[-10.8736751,12.159062],[-10.8719521,12.158088],[-10.8712031,12.157414],[-10.8704541,12.156889],[-10.8691051,12.15644],[-10.8684311,12.15584],[-10.8679811,12.155241],[-10.8673071,12.154791],[-10.8668571,12.154042],[-10.8661831,12.152619],[-10.8651341,12.151345],[-10.8638601,12.150371],[-10.8627361,12.149172],[-10.8604881,12.146549],[-10.8595141,12.145725],[-10.8591391,12.145051],[-10.8591391,12.142653],[-10.8586151,12.142428],[-10.8566671,12.142129],[-10.8545691,12.141305],[-10.8532201,12.14048],[-10.8524711,12.139656],[-10.8520211,12.138907],[-10.8509721,12.137708],[-10.8499981,12.136809],[-10.8487241,12.136359],[-10.8475261,12.136359],[-10.8467011,12.13606],[-10.8464771,12.135535],[-10.8463271,12.134336],[-10.8461771,12.133737],[-10.8456521,12.133138],[-10.8449781,12.132988],[-10.8440791,12.133063],[-10.8432551,12.132988],[-10.8425801,12.132538],[-10.8420561,12.131564],[-10.8410071,12.130365],[-10.8396581,12.13014],[-10.8378841,12.130446],[-10.8366191,12.130257],[-10.8361371,12.129466],[-10.8360621,12.128417],[-10.8354621,12.127667],[-10.8342631,12.127593],[-10.8317911,12.126768],[-10.8285691,12.12482],[-10.8269951,12.123771],[-10.8264711,12.123247],[-10.8258721,12.122348],[-10.8253471,12.12025],[-10.8249721,12.119426],[-10.8241481,12.119201],[-10.8229491,12.11965],[-10.8224251,12.12025],[-10.8212261,12.121374],[-10.8199521,12.121823],[-10.8187541,12.122048],[-10.8170301,12.122123],[-10.8157561,12.121748],[-10.8144831,12.121523],[-10.8133591,12.120924],[-10.8109611,12.120025],[-10.8071401,12.118676],[-10.8054171,12.118451],[-10.8043681,12.118526],[-10.8029441,12.118976],[-10.8012211,12.119201],[-10.7994221,12.119276],[-10.7980741,12.118976],[-10.7955271,12.118002],[-10.7932791,12.116579],[-10.7920801,12.11553],[-10.7916301,12.114181],[-10.7913311,12.112832],[-10.7911811,12.111259],[-10.7915551,12.109611],[-10.7921551,12.108037],[-10.7924551,12.106688],[-10.7924551,12.106089],[-10.7923051,12.105415],[-10.7917051,12.10459],[-10.7907311,12.103991],[-10.7898321,12.103167],[-10.7893831,12.102492],[-10.7893831,12.100544],[-10.7900571,12.099346],[-10.7904321,12.097847],[-10.7905061,12.096498],[-10.7900571,12.095299],[-10.7891581,12.094176],[-10.7882591,12.093426],[-10.7878841,12.092752],[-10.7884831,12.091104],[-10.7890081,12.089305],[-10.7894581,12.088106],[-10.7893831,12.087282],[-10.7887081,12.086682],[-10.7881091,12.086233],[-10.7879591,12.085783],[-10.7883341,12.085334],[-10.7883341,12.08451],[-10.7881091,12.08436],[-10.7876591,12.08421],[-10.7875091,12.083535],[-10.7878091,12.082486],[-10.7883341,12.081812],[-10.7889331,12.081138],[-10.7886331,12.080014],[-10.7880341,12.079564],[-10.7876591,12.07904],[-10.7878091,12.077991],[-10.7869851,12.075593],[-10.7862361,12.073196],[-10.7854111,12.071322],[-10.7851871,12.070723],[-10.7850371,12.070049],[-10.7852621,12.069749],[-10.7858611,12.070049],[-10.7861611,12.070273],[-10.7867601,12.070198],[-10.7871351,12.069749],[-10.7871351,12.068775],[-10.7876591,12.0684],[-10.7891581,12.067726],[-10.7897571,12.067501],[-10.7911811,12.067501],[-10.7920051,12.067576],[-10.7922301,12.067276],[-10.7925301,12.066677],[-10.7932041,12.066527],[-10.7942531,12.066677],[-10.7944781,12.066302],[-10.7943281,12.065628],[-10.7935041,12.064129],[-10.7928291,12.062555],[-10.7920801,12.059858],[-10.7921551,12.05821],[-10.7924551,12.056861],[-10.7929041,12.056112],[-10.7933541,12.054988],[-10.7935041,12.053414],[-10.7935781,12.051241],[-10.7944781,12.050192],[-10.7967251,12.049143],[-10.7985991,12.048769],[-10.7999471,12.048394],[-10.8003221,12.047945],[-10.8012211,12.046371],[-10.8015961,12.041576],[-10.8010711,12.040677],[-10.7996481,12.039703],[-10.7977741,12.03813],[-10.7961261,12.036856],[-10.7948521,12.035807],[-10.7941031,12.035133],[-10.7939531,12.034383],[-10.7941031,12.033409],[-10.7938031,12.032285],[-10.7926041,12.031461],[-10.7922301,12.030937],[-10.7914061,12.029063],[-10.7906561,12.028614],[-10.7890081,12.027865],[-10.7880341,12.02719],[-10.7874341,12.026066],[-10.7866101,12.023893],[-10.7858611,12.020747],[-10.7846621,12.01745],[-10.7836881,12.016551],[-10.7815151,12.015352],[-10.7795671,12.014003],[-10.7788181,12.013254],[-10.7782931,12.012205],[-10.7782181,12.011081],[-10.7785181,12.009808],[-10.7801671,12.00771],[-10.7806911,12.006885],[-10.7808411,12.005687],[-10.7798671,12.003963],[-10.7797921,12.002764],[-10.7803161,12.001341],[-10.7806161,12.000891],[-10.7805521,12.000057],[-10.7799601,11.999627],[-10.7789371,11.998765],[-10.7782911,11.997958],[-10.7778601,11.997204],[-10.7776981,11.994942],[-10.7762981,11.994134],[-10.7757601,11.993758],[-10.7753831,11.992896],[-10.7752221,11.991658],[-10.7747911,11.991011],[-10.7743061,11.990581],[-10.7733371,11.99015],[-10.7727451,11.989558],[-10.7728521,11.987404],[-10.7727451,11.98665],[-10.7717751,11.985788],[-10.7706451,11.985142],[-10.7701061,11.984657],[-10.7698911,11.982881],[-10.7693521,11.979919],[-10.7689751,11.978842],[-10.7683291,11.977873],[-10.7670911,11.975019],[-10.7666601,11.973511],[-10.7649911,11.971627],[-10.7648831,11.970496],[-10.7650981,11.969688],[-10.7651521,11.968934],[-10.7643991,11.967696],[-10.7639681,11.966781],[-10.7639681,11.965596],[-10.7645061,11.963927],[-10.7645061,11.962581],[-10.7653681,11.961504],[-10.7666061,11.96075],[-10.7678981,11.960104],[-10.7685981,11.959027],[-10.7688681,11.957196],[-10.7689751,11.956119],[-10.7697291,11.955419],[-10.7702141,11.954773],[-10.7703221,11.953965],[-10.7705371,11.953319],[-10.7712911,11.952565],[-10.7717751,11.951919],[-10.7719371,11.950842],[-10.7719911,11.949927],[-10.7723681,11.949334],[-10.7731221,11.948742],[-10.7734981,11.947719],[-10.7736601,11.944865],[-10.7736061,11.942497],[-10.7732291,11.941797],[-10.7720451,11.940881],[-10.7709681,11.940343],[-10.7696221,11.940343],[-10.7681681,11.940989],[-10.7649911,11.94282],[-10.7640751,11.943089],[-10.7620831,11.94212],[-10.7606831,11.94212],[-10.7593371,11.942658],[-10.7582601,11.942981],[-10.7572371,11.943089],[-10.7561601,11.942766],[-10.7550831,11.941958],[-10.7544911,11.94142],[-10.7535221,11.941043],[-10.7522291,11.94115],[-10.7516371,11.940827],[-10.7509371,11.939804],[-10.7500751,11.939158],[-10.7489451,11.938835],[-10.7474371,11.938781],[-10.7467371,11.938458],[-10.7460911,11.937597],[-10.7451751,11.936143],[-10.7445291,11.935227],[-10.7438291,11.934904],[-10.7422681,11.934635],[-10.7418911,11.933989],[-10.7415141,11.932804],[-10.7412451,11.93232],[-10.7404371,11.931943],[-10.7397371,11.931351],[-10.7384981,11.929735],[-10.7380681,11.929251],[-10.7351061,11.929251],[-10.7345141,11.929143],[-10.7340291,11.928227],[-10.7340291,11.927258],[-10.7334911,11.926181],[-10.7328981,11.924781],[-10.7322521,11.923974],[-10.7298831,11.923489],[-10.7284831,11.923328],[-10.7279981,11.922842],[-10.7274601,11.921927],[-10.7258981,11.921119],[-10.7253061,11.920204],[-10.7251981,11.919504],[-10.7241751,11.919181],[-10.7218601,11.919396],[-10.7204061,11.918911],[-10.7188451,11.918804],[-10.7167981,11.918858],[-10.7136221,11.916596],[-10.7128681,11.916381],[-10.7123291,11.915681],[-10.7120061,11.914119],[-10.7116831,11.913365],[-10.7107681,11.912719],[-10.7094751,11.912127],[-10.7086681,11.911535],[-10.7082371,11.910512],[-10.7081831,11.909704],[-10.7080221,11.909273],[-10.7074291,11.908896],[-10.7061911,11.909004],[-10.7051141,11.909219],[-10.7039291,11.909165],[-10.7033371,11.908896],[-10.7028521,11.908412],[-10.7017221,11.907658],[-10.7009141,11.907388],[-10.7001061,11.907388],[-10.6991911,11.907765],[-10.6983291,11.908573],[-10.6973601,11.909058],[-10.6960681,11.909165],[-10.6950451,11.909327],[-10.6939141,11.909758],[-10.6934291,11.90965],[-10.6927291,11.909165],[-10.6923521,11.908573],[-10.6915451,11.90825],[-10.6906831,11.908088],[-10.6898221,11.907496],[-10.6894981,11.90685],[-10.6892831,11.90615],[-10.6890141,11.905612],[-10.6880451,11.905504],[-10.6874521,11.906096],[-10.6862141,11.90685],[-10.6851911,11.907173],[-10.6846521,11.906904],[-10.6840601,11.905504],[-10.6829831,11.903888],[-10.6817981,11.903512],[-10.6804521,11.903404],[-10.6791061,11.903135],[-10.6783521,11.902865],[-10.6767911,11.902704],[-10.6755521,11.902704],[-10.6745831,11.90265],[-10.6742061,11.902381],[-10.6739911,11.901519],[-10.6737751,11.901142],[-10.6731831,11.900873],[-10.6722681,11.900819],[-10.6697911,11.900927],[-10.6692521,11.901196],[-10.6685521,11.901681],[-10.6677451,11.901681],[-10.6668291,11.901573],[-10.6663451,11.90125],[-10.6657521,11.900981],[-10.6650521,11.900981],[-10.6644061,11.901142],[-10.6637601,11.901412],[-10.6627371,11.901196],[-10.6619291,11.900819],[-10.6607451,11.900442],[-10.6598831,11.900442],[-10.6571809,11.8977505],[-10.655726,11.8991384],[-10.6542735,11.90173],[-10.6528853,11.9027958],[-10.6518601,11.9042753],[-10.6511445,11.905895],[-10.6509203,11.9065324],[-10.6509844,11.9075878],[-10.6507815,11.9084865],[-10.650365,11.9088313],[-10.6496815,11.9088209],[-10.6492864,11.908476],[-10.649233,11.907661],[-10.6487951,11.9073057],[-10.6483253,11.906825],[-10.6480261,11.9061353],[-10.6476525,11.9057174],[-10.6471719,11.905477],[-10.6467874,11.9048083],[-10.6460506,11.9043276],[-10.6457301,11.9041081],[-10.6447691,11.9040872],[-10.6428041,11.9043067],[-10.6416507,11.9044007],[-10.6404759,11.904338],[-10.6389808,11.9046045],[-10.6368412,11.9050202],[-10.6353157,11.9054487],[-10.6341076,11.9061137],[-10.633277,11.9070152],[-10.6319025,11.9088624],[-10.6308605,11.9107539],[-10.630483,11.91201],[-10.6303017,11.9132365],[-10.6302261,11.9147734],[-10.6302262,11.9162511],[-10.630483,11.9175072],[-10.6310569,11.91931],[-10.6316761,11.9212458],[-10.6331107,11.9264472],[-10.6333223,11.9284273],[-10.633292,11.9298754],[-10.6330806,11.9313382],[-10.6326124,11.9323726],[-10.6319327,11.9331114],[-10.6306642,11.9338946],[-10.6279608,11.9351505],[-10.6263297,11.9356529],[-10.6249704,11.9360962],[-10.624019,11.9367907],[-10.6232336,11.9380467],[-10.622841,11.9393617],[-10.6220707,11.9407507],[-10.6217687,11.9423465],[-10.6213609,11.9439718],[-10.6211646,11.9453755],[-10.6208171,11.946794],[-10.6205454,11.9483158],[-10.6202456,11.9494098],[-10.6199866,11.9503548],[-10.6190351,11.9523495],[-10.6171774,11.9552307],[-10.6164072,11.9572253],[-10.6161807,11.9582448],[-10.6161052,11.9593825],[-10.6162108,11.9605349],[-10.6159844,11.9617612],[-10.6154407,11.9627511],[-10.6147006,11.9632535],[-10.6136282,11.9635342],[-10.6126618,11.9644059],[-10.6119518,11.9654992],[-10.6112572,11.9675676],[-10.610351,11.9688382],[-10.6102,11.9698281],[-10.6102452,11.9711873],[-10.6098225,11.9731375],[-10.6091428,11.9747331],[-10.6082215,11.975856],[-10.6069227,11.9766685],[-10.6025127,11.9785005],[-10.6005644,11.978988],[-10.5992506,11.9790176],[-10.5978762,11.9787517],[-10.5959129,11.9779539],[-10.5949311,11.9774516],[-10.5939797,11.9772152],[-10.5925752,11.9773186],[-10.5907476,11.9782493],[-10.5893734,11.9793574],[-10.5881954,11.9807166],[-10.5873646,11.9824746],[-10.58667,11.9838634],[-10.5855976,11.9849566],[-10.5838307,11.9857396],[-10.5816559,11.9861089],[-10.579617,11.986168],[-10.5774725,11.9860942],[-10.5751617,11.9863748],[-10.5736062,11.9869067],[-10.5712953,11.9876749],[-10.5686374,11.9888863],[-10.5673837,11.9897136],[-10.5665683,11.9906148],[-10.565934,11.9917228],[-10.5655111,11.9932001],[-10.5653147,11.9950615],[-10.5653902,11.9980456],[-10.5656621,11.9990354],[-10.5661303,12.0002911],[-10.5672781,12.0022558],[-10.5682144,12.0034819],[-10.5688035,12.0039546],[-10.5699362,12.004649],[-10.5722318,12.0055353],[-10.5739534,12.0065546],[-10.5752524,12.0079284],[-10.5771704,12.0110896],[-10.5792848,12.0141179],[-10.5802513,12.0156837],[-10.5807346,12.0168507],[-10.5810669,12.0185938],[-10.5812934,12.0200857],[-10.581535,12.0212822],[-10.5817012,12.0221537],[-10.58152,12.0232025],[-10.5809762,12.023941],[-10.5796019,12.024916],[-10.5781823,12.0253886],[-10.5769741,12.0255954],[-10.5756752,12.0258909],[-10.5745425,12.0264522],[-10.572851,12.0277668],[-10.5714012,12.0287565],[-10.5704195,12.0292439],[-10.5687279,12.0294802],[-10.5672932,12.0293473],[-10.5651638,12.0291701],[-10.5635327,12.028978],[-10.5609047,12.0282986],[-10.5591982,12.0283281],[-10.5576728,12.0286383],[-10.5551205,12.029628],[-10.5517827,12.0306324],[-10.5504084,12.0310312],[-10.5497892,12.03143],[-10.5471764,12.0323458],[-10.5456208,12.0326708],[-10.5445032,12.0331287],[-10.5415431,12.0339706],[-10.5403802,12.0343251],[-10.5378581,12.0351818],[-10.53594,12.0359203],[-10.5339465,12.0364964],[-10.5327987,12.0366589],[-10.532119,12.0365703],[-10.5316811,12.0360533],[-10.5312884,12.0347091],[-10.5310467,12.0336752],[-10.5306239,12.0333798],[-10.5301708,12.0334684],[-10.5296875,12.0343694],[-10.528736,12.0358022],[-10.5277997,12.036777],[-10.5270143,12.0372054],[-10.5263346,12.0376928],[-10.5259722,12.0385495],[-10.5259118,12.0392733],[-10.525353,12.0401004],[-10.524024,12.0411344],[-10.5226798,12.0433942],[-10.521547,12.0451962],[-10.519916,12.0466437],[-10.5191156,12.0475594],[-10.5187983,12.048549],[-10.5186776,12.0498783],[-10.5184964,12.0518132],[-10.5186021,12.053172],[-10.5190702,12.054708],[-10.5195687,12.0560521],[-10.5195385,12.0572484],[-10.5189796,12.0586663],[-10.5187984,12.0600841],[-10.5189797,12.0612952],[-10.5194176,12.062846],[-10.5199462,12.0654158],[-10.5203842,12.066937],[-10.5209882,12.0701714],[-10.5214716,12.0723277],[-10.5215169,12.0739079],[-10.5211998,12.0752223],[-10.5209128,12.07633],[-10.5209128,12.0779693],[-10.5211242,12.0794165],[-10.5210336,12.0809081],[-10.5203842,12.0829462],[-10.5197649,12.0846297],[-10.5195989,12.0853238],[-10.5191307,12.0856044],[-10.5184511,12.0852647],[-10.5175901,12.0844377],[-10.5169408,12.0841424],[-10.5163216,12.08429],[-10.5155061,12.0842162],[-10.5126365,12.0828428],[-10.5116549,12.082385],[-10.5110809,12.0823259],[-10.5108242,12.0829314],[-10.5105826,12.0838618],[-10.5098274,12.0851614],[-10.5085588,12.0879968],[-10.5084379,12.0890896],[-10.5080604,12.0903744],[-10.5079094,12.0921761],[-10.5079245,12.0929292],[-10.5073052,12.0952034],[-10.5071543,12.096311],[-10.5072449,12.0972118],[-10.5078339,12.0979354],[-10.5097971,12.0995007],[-10.5105826,12.0998994],[-10.5120022,12.1000175],[-10.5145092,12.1003424],[-10.5160799,12.100623],[-10.5168652,12.1011546],[-10.5172278,12.1019077],[-10.5173788,12.1035026],[-10.5171219,12.106072],[-10.5172731,12.1080951],[-10.517409,12.1116538],[-10.5180281,12.1173536],[-10.5180433,12.118786],[-10.5179206,12.1196209],[-10.5174261,12.1205243],[-10.5167801,12.120805],[-10.5159367,12.1206471],[-10.5151292,12.1205769],[-10.5147166,12.1208576],[-10.5145909,12.1215418],[-10.5146088,12.1230857],[-10.5144833,12.1242085],[-10.5139988,12.1254014],[-10.5134605,12.1257523],[-10.5128324,12.1259102],[-10.5110022,12.1258751],[-10.5089207,12.1258049],[-10.507987,12.1256933],[-10.5066675,12.1256685],[-10.5017444,12.1252219],[-10.4947344,12.1245118],[-10.492822,12.1242483],[-10.4918306,12.1241649],[-10.4896549,12.1240202],[-10.4879817,12.12395],[-10.487551,12.1238974],[-10.4871787,12.1237877],[-10.4868692,12.1236562],[-10.4866135,12.1236825],[-10.4863219,12.1237702],[-10.4860572,12.1237658],[-10.4857253,12.1237132],[-10.4852811,12.1237526],[-10.4846665,12.1236781],[-10.4838277,12.1235246],[-10.4827421,12.1233228],[-10.4818895,12.1233164],[-10.4808936,12.1234392],[-10.4800771,12.1236409],[-10.4791351,12.1236497],[-10.4780135,12.1235357],[-10.4760398,12.1234041],[-10.4752144,12.1234479],[-10.4747927,12.123255],[-10.4743441,12.1227111],[-10.4740301,12.1217988],[-10.4738776,12.1211059],[-10.4729534,12.1202638],[-10.4710245,12.1193339],[-10.470226,12.1191146],[-10.4697953,12.1192462],[-10.4695621,12.1195796],[-10.469275,12.1198953],[-10.4685124,12.1199918],[-10.4670229,12.1200708],[-10.466063,12.1200796],[-10.4646634,12.1206059],[-10.4636944,12.1206497],[-10.4624921,12.1204918],[-10.4597917,12.1208252],[-10.4583023,12.1207813],[-10.4555121,12.1204041],[-10.4528922,12.1200883],[-10.4518336,12.120141],[-10.4506942,12.1204041],[-10.4494829,12.1208603],[-10.4476437,12.1217901],[-10.446289,12.1227111],[-10.4451046,12.1237725],[-10.4442972,12.1248865],[-10.4439473,12.1255619],[-10.443723,12.1262286],[-10.4437498,12.1271058],[-10.4438396,12.1278075],[-10.4438576,12.1284303],[-10.4436871,12.128711],[-10.4429963,12.1291934],[-10.4417133,12.1300881],[-10.4403944,12.131474],[-10.438094,12.1336909],[-10.4332167,12.1385769],[-10.4320682,12.1394891],[-10.4308841,12.1401206],[-10.4294844,12.140682],[-10.4263981,12.1416293],[-10.4243165,12.1419275],[-10.422917,12.1420503],[-10.4212123,12.1420328],[-10.4178927,12.1416468],[-10.4153856,12.1415715],[-10.4134445,12.1420305],[-10.4117188,12.142998],[-10.4105769,12.1440152],[-10.4098409,12.1449579],[-10.4091939,12.1464092],[-10.4088513,12.147724],[-10.4086864,12.1489644],[-10.408737,12.1503909],[-10.4090543,12.1516809],[-10.4097776,12.1531445],[-10.4109195,12.154695],[-10.4125942,12.1565556],[-10.4134445,12.1579448],[-10.4140662,12.1593712],[-10.414561,12.1609165],[-10.4148274,12.1624793],[-10.4150432,12.1641165],[-10.4151447,12.1677383],[-10.4150811,12.1709879],[-10.4148402,12.1726127],[-10.4144594,12.1739026],[-10.4138251,12.175056],[-10.4127593,12.1761475],[-10.4108307,12.177611],[-10.4089655,12.1788637],[-10.40776,12.1794218],[-10.4071603,12.1796201],[-10.4054635,12.1798931],[-10.4034208,12.1803644],[-10.4006294,12.1814434],[-10.3977491,12.1821628],[-10.3961251,12.1823116],[-10.3949958,12.1821752],[-10.3939045,12.1817659],[-10.3930672,12.1810837],[-10.3913036,12.1796822],[-10.387992,12.1779087],[-10.3854543,12.1763707],[-10.3843251,12.1754529],[-10.3833354,12.1741878],[-10.3824852,12.1726003],[-10.3817747,12.1714096],[-10.3804298,12.169884],[-10.3794655,12.168991],[-10.3786661,12.1685693],[-10.378019,12.1683708],[-10.3776066,12.1683408],[-10.3766995,12.1684577],[-10.375659,12.1687553],[-10.3733878,12.1699708],[-10.3717511,12.1706282],[-10.3685917,12.1717197],[-10.365204,12.1726871],[-10.3632881,12.1732948],[-10.3614609,12.1742499],[-10.3599511,12.1753041],[-10.3591009,12.1761103],[-10.3586569,12.1768668],[-10.35853,12.1775614],[-10.3585046,12.1781071],[-10.3587457,12.1788265],[-10.3596972,12.1809349],[-10.3605474,12.1831177],[-10.3620573,12.1858835],[-10.3636305,12.1883143],[-10.3644934,12.1900506],[-10.3647852,12.1912288],[-10.3649502,12.192283],[-10.3648106,12.1929775],[-10.3645569,12.1935604],[-10.3635163,12.1945401],[-10.3611057,12.1964128],[-10.3591644,12.1975538],[-10.3572739,12.1982607],[-10.356043,12.1985707],[-10.3549012,12.1985459],[-10.3539876,12.1983227],[-10.3527822,12.1975166],[-10.3502826,12.196202],[-10.3467173,12.1946517],[-10.3432153,12.1935232],[-10.3403859,12.1926922],[-10.3383049,12.192345],[-10.3364399,12.1922706],[-10.3350187,12.1924318],[-10.3336611,12.1927418],[-10.3325192,12.1933991],[-10.3318466,12.1942177],[-10.3311616,12.1953338],[-10.3306414,12.1963756],[-10.33021,12.1976406],[-10.3300068,12.1987691],[-10.330045,12.1997117],[-10.3302861,12.200431],[-10.3308571,12.2012743],[-10.3316057,12.2020804],[-10.3322653,12.2028617],[-10.3334835,12.2048211],[-10.3361988,12.2081074],[-10.3394722,12.2125595],[-10.3407792,12.2148536],[-10.3415658,12.2165402],[-10.3418831,12.2177554],[-10.3422003,12.2194296],[-10.342213,12.2214633],[-10.3420479,12.2229265],[-10.3415786,12.2241914],[-10.3410457,12.2250842],[-10.3396393,12.2269298],[-10.339147,12.2263718],[-10.3389391,12.2260202],[-10.3386672,12.2257233],[-10.3381317,12.225403],[-10.3373323,12.2250124],[-10.3365328,12.2248639],[-10.3327996,12.2242936],[-10.3316245,12.2240826],[-10.3305531,12.2237857],[-10.3298737,12.2233873],[-10.3276353,12.2217778],[-10.3261405,12.2205746],[-10.3251891,12.2196371],[-10.324022,12.2181135],[-10.3236222,12.2177697],[-10.3231427,12.2174963],[-10.3224232,12.2172931],[-10.3216558,12.2172384],[-10.3212639,12.21734],[-10.3209763,12.21759],[-10.3207284,12.2179573],[-10.3206084,12.2185432],[-10.3206085,12.2195824],[-10.3207924,12.2209496],[-10.3211041,12.222981],[-10.3211201,12.2235748],[-10.3207843,12.2250905],[-10.3204965,12.2258015],[-10.3201289,12.2267078],[-10.3198251,12.2271687],[-10.3195773,12.2273328],[-10.3191856,12.2273484],[-10.3187619,12.2271531],[-10.3182981,12.2267468],[-10.3176827,12.2261218],[-10.3169552,12.2255983],[-10.3162756,12.2252311],[-10.3153484,12.2249811],[-10.3142452,12.224817],[-10.311767,12.2244186],[-10.3108477,12.2242076],[-10.3096405,12.2237232],[-10.308897,12.2233013],[-10.3081936,12.2226763],[-10.3076979,12.222145],[-10.3072343,12.2214184],[-10.3070185,12.2207934],[-10.3068745,12.2191448],[-10.3068666,12.2175822],[-10.3067866,12.2168322],[-10.3065868,12.2160509],[-10.306283,12.2154414],[-10.3057473,12.2145742],[-10.3033252,12.2118083],[-10.3021181,12.2103628],[-10.3013027,12.2091518],[-10.3007431,12.2079876],[-10.3005911,12.2075031],[-10.3005912,12.20705],[-10.300799,12.2062217],[-10.3010628,12.2048544],[-10.3010307,12.2043856],[-10.3008949,12.2040496],[-10.3005912,12.2038777],[-10.3001195,12.2038777],[-10.299496,12.2040496],[-10.2991522,12.2040652],[-10.2989204,12.2040262],[-10.2987925,12.2037683],[-10.2987525,12.2029166],[-10.2985765,12.2013461],[-10.2985766,12.2000491],[-10.2986646,12.1994552],[-10.2988563,12.1990411],[-10.2993361,12.1984551],[-10.2999596,12.1978613],[-10.3002714,12.1972362],[-10.3004232,12.1965564],[-10.3004073,12.1960094],[-10.3001755,12.1950796],[-10.2996238,12.1939935],[-10.2989204,12.1929777],[-10.2984486,12.1924229],[-10.298097,12.1921572],[-10.2977293,12.1920322],[-10.2971297,12.1920869],[-10.2962982,12.1923057],[-10.2949953,12.1928448],[-10.293948,12.1933762],[-10.292613,12.1942513],[-10.29131,12.1951343],[-10.2906783,12.1954156],[-10.2883441,12.1960407],[-10.2869106,12.1963449],[-10.2856728,12.1967704],[-10.2850284,12.1971129],[-10.2846269,12.19745],[-10.2843218,12.197798],[-10.28409,12.1982898],[-10.2840179,12.1989495],[-10.2840518,12.199701],[-10.284391,12.2011927],[-10.2855554,12.2042867],[-10.2858381,12.2058448],[-10.2861772,12.206784],[-10.2865728,12.2074249],[-10.2873303,12.2081431],[-10.2877035,12.2085741],[-10.2879183,12.2091044],[-10.2879296,12.209889],[-10.2875791,12.2110823],[-10.2867086,12.2126624],[-10.286132,12.2133586],[-10.2853972,12.2137121],[-10.2843005,12.2138116],[-10.282842,12.2135133],[-10.2812255,12.2129166],[-10.2794392,12.2123088],[-10.2782407,12.2120879],[-10.2774947,12.2120547],[-10.2766354,12.2121984],[-10.2752788,12.2127177],[-10.2728707,12.2138779],[-10.2717288,12.2141652],[-10.2702705,12.2141873],[-10.269106,12.2139552],[-10.2682241,12.2135906],[-10.2672293,12.2129276],[-10.2666414,12.212342],[-10.2658727,12.2108061],[-10.2651378,12.2091044],[-10.2648778,12.2082205],[-10.2647081,12.2075685],[-10.264369,12.207237],[-10.2639733,12.2071707],[-10.2630802,12.2076238],[-10.2624357,12.2082205],[-10.261701,12.2093917],[-10.2614749,12.2100768],[-10.2611357,12.2124746],[-10.2608756,12.2135574],[-10.2603782,12.2145409],[-10.2597789,12.215237],[-10.2585015,12.2159662],[-10.2573936,12.2164193],[-10.2561838,12.2164524],[-10.2550873,12.216353],[-10.2541714,12.2162314],[-10.2532219,12.2163309],[-10.252781,12.2167287],[-10.2523514,12.2170712],[-10.2503728,12.2178667],[-10.2496946,12.2179772],[-10.2489824,12.2178446],[-10.2483492,12.2175132],[-10.2479083,12.2170491],[-10.2474899,12.2158668],[-10.2470943,12.2152812],[-10.2463821,12.2148392],[-10.245342,12.2139663],[-10.2448219,12.2132812],[-10.2440419,12.2122536],[-10.2436801,12.2116569],[-10.2436688,12.2110381],[-10.2439175,12.2105188],[-10.2451045,12.2097011],[-10.2461108,12.2092039],[-10.2468004,12.2088061],[-10.2471735,12.2083973],[-10.2475353,12.2077785],[-10.2477613,12.2069718],[-10.2478066,12.2063862],[-10.2476709,12.2057453],[-10.2473656,12.2050823],[-10.2462012,12.20369],[-10.2453081,12.2023861],[-10.2445731,12.2015242],[-10.2440419,12.2010491],[-10.2432279,12.200585],[-10.2425438,12.2002921],[-10.2418204,12.2001485],[-10.2407859,12.2002756],[-10.2386152,12.2007618],[-10.2371795,12.2012259],[-10.2355967,12.2020988],[-10.2325782,12.203248],[-10.2316058,12.2036348],[-10.2305771,12.204342],[-10.2289943,12.2051597],[-10.2274793,12.2069497],[-10.2267333,12.207447],[-10.2256704,12.2083641],[-10.2247887,12.2087398],[-10.2239973,12.2089829],[-10.2230815,12.2089387],[-10.2222902,12.2088061],[-10.2216797,12.2084525],[-10.2208544,12.2078448],[-10.2201083,12.2073254],[-10.2186046,12.2066293],[-10.2155973,12.2054249],[-10.2136303,12.2046072],[-10.2112561,12.203458],[-10.21051,12.2029828],[-10.2097638,12.202795],[-10.207333,12.2026292],[-10.2056147,12.2027287],[-10.2049364,12.2028502],[-10.2042015,12.202795],[-10.2022231,12.2028281],[-10.2003576,12.2031375],[-10.1985714,12.203911],[-10.19726,12.2044193],[-10.1945467,12.2049276],[-10.1930091,12.2052923],[-10.1925004,12.2053144],[-10.1917542,12.2049939],[-10.190488,12.2044635],[-10.1898775,12.204132],[-10.1896401,12.2035795],[-10.1896966,12.2027508],[-10.1900809,12.2018999],[-10.1912568,12.2003861],[-10.191562,12.1997673],[-10.191674,12.1990328],[-10.1915779,12.1982202],[-10.1907945,12.1969387],[-10.1893397,12.1943446],[-10.1883644,12.1932975],[-10.1873411,12.1922505],[-10.1859341,12.1911721],[-10.1823368,12.1902032],[-10.1812655,12.1896406],[-10.1796507,12.1879372],[-10.1783717,12.1873277],[-10.1775883,12.1869526],[-10.1767728,12.1866713],[-10.1757017,12.1870464],[-10.1738788,12.1882205],[-10.1726536,12.1891476],[-10.1719659,12.1895367],[-10.1704853,12.1899561],[-10.1688331,12.1897883],[-10.1671819,12.1898397],[-10.1661519,12.1891686],[-10.1650565,12.188467],[-10.1637916,12.1874487],[-10.162075,12.1866307],[-10.1608293,12.1856774],[-10.1589196,12.1849643],[-10.1580184,12.1843561],[-10.1572255,12.1837153],[-10.1565818,12.1813242],[-10.1548426,12.1805177],[-10.1534704,12.1803384],[-10.1524823,12.1797836],[-10.1524619,12.1788492],[-10.1506155,12.1775813],[-10.1497357,12.1769101],[-10.1489418,12.1764486],[-10.1478045,12.1764906],[-10.1465171,12.1767213],[-10.1447575,12.1767842],[-10.1428489,12.1768146],[-10.1408093,12.1763438],[-10.1391356,12.1757355],[-10.1370542,12.1756096],[-10.1360672,12.1756516],[-10.135402,12.1761969],[-10.1347379,12.177339],[-10.1339214,12.1778539],[-10.1326769,12.1787559],[-10.1320557,12.1799189],[-10.1319473,12.1807065],[-10.1319902,12.1815245],[-10.1321415,12.1824988],[-10.1321404,12.1830347],[-10.1316469,12.1831605],[-10.1302951,12.1830137],[-10.1294153,12.1827201],[-10.1287716,12.1822796],[-10.1279133,12.1822796],[-10.1270346,12.1814081],[-10.1232784,12.1804129],[-10.1230638,12.1799514],[-10.1225059,12.1792173],[-10.1218633,12.1788702],[-10.1210039,12.178672],[-10.1198452,12.1783783],[-10.1181286,12.1779588],[-10.1171201,12.1779169],[-10.1159613,12.1777491],[-10.1144808,12.1771408],[-10.1136021,12.1763951],[-10.1128714,12.1760921],[-10.1119058,12.1762389],[-10.1113265,12.176973],[-10.1104467,12.1776442],[-10.1096099,12.1785881],[-10.1088803,12.1783364],[-10.1071648,12.1776536],[-10.1065843,12.1773925],[-10.1056627,12.1770663],[-10.1044815,12.1767213],[-10.1036017,12.1766164],[-10.1029151,12.1766584],[-10.1019495,12.1772247],[-10.1003187,12.1778749],[-10.0992898,12.1784926],[-10.0988596,12.1781476],[-10.0983671,12.1777375],[-10.097658,12.1781056],[-10.0952976,12.1785251],[-10.0944393,12.1791754],[-10.0936883,12.1802031],[-10.092551,12.181944],[-10.0914138,12.1832444],[-10.0913076,12.183988],[-10.091608,12.1852464],[-10.092359,12.1857288],[-10.0931529,12.186421],[-10.0930875,12.1874602],[-10.0928096,12.1879311],[-10.0921648,12.1882573],[-10.0912636,12.1881943],[-10.0903623,12.1871666],[-10.0893753,12.1853209],[-10.0886243,12.184377],[-10.0874226,12.1829508],[-10.0858777,12.1817343],[-10.0845913,12.1809676],[-10.0838821,12.1804129],[-10.0836461,12.1792802],[-10.0835817,12.1773925],[-10.083453,12.1760711],[-10.0828307,12.1756935],[-10.0821022,12.1753044],[-10.0819509,12.1747077],[-10.0822084,12.1739316],[-10.0823372,12.1735121],[-10.0831097,12.1731975],[-10.0839894,12.1729248],[-10.0848048,12.1727151],[-10.0856417,12.1725892],[-10.0862221,12.1726196],[-10.0867371,12.173186],[-10.0871652,12.1736589],[-10.0877445,12.1737848],[-10.0887326,12.1729762],[-10.0896542,12.171939],[-10.0904911,12.1703658],[-10.0910704,12.169359],[-10.0911563,12.1683312],[-10.091049,12.1668629],[-10.0914781,12.1647234],[-10.0918215,12.1628985],[-10.0922302,12.1618172],[-10.0928729,12.160675],[-10.0929158,12.1592906],[-10.0924223,12.1583466],[-10.0922077,12.1576964],[-10.0921004,12.1566895],[-10.0918644,12.1549065],[-10.0919475,12.1538394],[-10.0933798,12.1516498],[-10.0935085,12.1509183],[-10.0932464,12.1505269],[-10.0920743,12.1503224],[-10.0895817,12.1503261],[-10.089317,12.1492237],[-10.089325,12.1490717],[-10.0894457,12.1489484],[-10.0899178,12.148854],[-10.0906339,12.1488698],[-10.0922728,12.1483663],[-10.0924672,12.148205],[-10.0926027,12.1478865],[-10.0930908,12.1461978],[-10.0933805,12.1457782],[-10.0938606,12.1455082],[-10.0941959,12.145495],[-10.0943729,12.1455947],[-10.0944239,12.1457127],[-10.095183,12.1463158],[-10.0954163,12.1463472],[-10.0974548,12.1461742],[-10.0994316,12.1458412],[-10.0996515,12.145697],[-10.0997776,12.1454924],[-10.1000834,12.1445983],[-10.1001504,12.1441263],[-10.1002818,12.1439952],[-10.1005983,12.1439348],[-10.101639,12.1442154],[-10.1020628,12.1442076],[-10.10342,12.1435599],[-10.1048791,12.1431351],[-10.1052091,12.1431377],[-10.1067674,12.1436123],[-10.1078403,12.1438378],[-10.1082426,12.1437985],[-10.1096106,12.143316],[-10.1100102,12.1433344],[-10.1104125,12.1435494],[-10.1114291,12.1449444],[-10.1116142,12.1450388],[-10.1127702,12.1452066],[-10.1132476,12.1454819],[-10.1134354,12.1454636],[-10.1135373,12.145301],[-10.1136392,12.1450178],[-10.1140657,12.1429187],[-10.114232,12.1427326],[-10.1144452,12.1426998],[-10.1150675,12.1429935],[-10.1152459,12.1432269],[-10.1160599,12.1437578],[-10.1164314,12.1438247],[-10.116705,12.1437356],[-10.1168713,12.1435153],[-10.1170376,12.1431089],[-10.1170135,12.1427693],[-10.1170899,12.1425779],[-10.117114,12.1423038],[-10.1171999,12.1421911],[-10.1173098,12.1421518],[-10.1174667,12.1421636],[-10.1180555,12.1423143],[-10.1186523,12.1425634],[-10.1200604,12.1429214],[-10.1201972,12.1428807],[-10.1204547,12.1425975],[-10.1205701,12.1423379],[-10.1205245,12.1411606],[-10.1207417,12.1404263],[-10.1211065,12.1399386],[-10.1216,12.1397682],[-10.1219675,12.1394954],[-10.1225737,12.1394535],[-10.1241669,12.1398678],[-10.1247919,12.1402926],[-10.125044,12.140311],[-10.1252666,12.140269],[-10.1255482,12.1400514],[-10.125795,12.1397865],[-10.1259694,12.1397183],[-10.1262054,12.1396659],[-10.1262966,12.1395558],[-10.1263261,12.1392044],[-10.1265594,12.1388845],[-10.126648,12.1386327],[-10.1267928,12.1385698],[-10.1281956,12.1387927],[-10.1287428,12.1386406],[-10.1289177,12.138637],[-10.1290968,12.1386878],[-10.1292926,12.1388818],[-10.1295957,12.1394168],[-10.1297218,12.1395059],[-10.1299632,12.1395531],[-10.1302689,12.1394745],[-10.1307544,12.1390602],[-10.1311621,12.1385855],[-10.1315483,12.1378382],[-10.1315618,12.1376677],[-10.1314545,12.1375471],[-10.1312131,12.1375209],[-10.1306418,12.1376389],[-10.1305023,12.137555],[-10.1304486,12.137159],[-10.1307142,12.136548],[-10.1309904,12.1363697],[-10.1312426,12.1363592],[-10.131602,12.1365008],[-10.1322323,12.1371013],[-10.1329806,12.1379719],[-10.1339355,12.1383154],[-10.1344532,12.1386013],[-10.1345927,12.1386327],[-10.1351801,12.1385908],[-10.1359069,12.1388058],[-10.1367545,12.1389028],[-10.1370791,12.1388582],[-10.1389244,12.1383023],[-10.1392007,12.1380244],[-10.1399303,12.136965],[-10.1400188,12.1369047],[-10.1401019,12.1369492],[-10.1401636,12.1370725],[-10.1400831,12.1381581],[-10.1401636,12.1383758],[-10.1404855,12.138499],[-10.1409093,12.1385226],[-10.1411802,12.1383836],[-10.1420331,12.1372482],[-10.1423201,12.1371564],[-10.1437122,12.1373373],[-10.1442835,12.1371354],[-10.144482,12.1370017],[-10.1446268,12.136729],[-10.1446,12.1365166],[-10.1443854,12.1361206],[-10.1435298,12.1356303],[-10.143283,12.135313],[-10.1433152,12.1350114],[-10.1434976,12.134681],[-10.1438811,12.1346076],[-10.1445115,12.1347229],[-10.1454797,12.1353234],[-10.1456031,12.1355437],[-10.1461637,12.1356512],[-10.1467833,12.135903],[-10.14714,12.1358767],[-10.1475343,12.1356853],[-10.1476282,12.1355227],[-10.1476631,12.1352107],[-10.1475263,12.1346259],[-10.1476496,12.1344135],[-10.148052,12.1342824],[-10.1486206,12.1342745],[-10.1491061,12.1344476],[-10.1492643,12.1344292],[-10.1493797,12.1343453],[-10.1495165,12.1341172],[-10.1496747,12.1340805],[-10.1498142,12.134146],[-10.1499376,12.1342955],[-10.1500717,12.1343401],[-10.1504204,12.1342929],[-10.1506162,12.1341093],[-10.1506537,12.1339179],[-10.1505438,12.1338078],[-10.1504552,12.133695],[-10.150466,12.1335193],[-10.1505652,12.1334039],[-10.1507288,12.1333725],[-10.1513162,12.133341],[-10.151799,12.1331942],[-10.1522094,12.1329319],[-10.1526091,12.1329398],[-10.1530892,12.1330761],[-10.1536015,12.1329686],[-10.1543713,12.1326985],[-10.1545376,12.1327353],[-10.1545832,12.1328428],[-10.1545644,12.1330211],[-10.1542613,12.133341],[-10.1534191,12.1338314],[-10.1533654,12.1339258],[-10.1533628,12.1340543],[-10.1539797,12.1353392],[-10.1543069,12.1355647],[-10.1558358,12.1360524],[-10.1561844,12.1364825],[-10.1566243,12.1366241],[-10.1572251,12.1365402],[-10.1577455,12.1362098],[-10.1579064,12.1358689],[-10.1580298,12.1350455],[-10.1582283,12.1348882],[-10.158931,12.1350612],[-10.1603472,12.1352762],[-10.1608729,12.1352133],[-10.1614791,12.1349511],[-10.1620424,12.1341067],[-10.1627666,12.1337711],[-10.1635552,12.1331837],[-10.1638931,12.1325963],[-10.1645744,12.1322029],[-10.164966,12.1319092],[-10.1662213,12.1313428],[-10.1666772,12.1312956],[-10.1673666,12.1307371],[-10.167836,12.1300579],[-10.168013,12.1299871],[-10.1681578,12.1298612],[-10.1683,12.1296068],[-10.1686004,12.1294233],[-10.1687425,12.1291899],[-10.1689249,12.1291296],[-10.1694882,12.1291138],[-10.1696116,12.1291545],[-10.170258,12.1292305],[-10.1713228,12.1295203],[-10.1718767,12.1297327],[-10.1719934,12.1297497],[-10.1725808,12.1297511],[-10.1729509,12.1296121],[-10.173187,12.1294364],[-10.1734498,12.1291086],[-10.1739138,12.1282301],[-10.1742974,12.1278236],[-10.1746139,12.1271222],[-10.1748727,12.1269242],[-10.1751034,12.1266462],[-10.1754239,12.1265098],[-10.1756975,12.1263263],[-10.1763211,12.1262581],[-10.1765612,12.1261493],[-10.1772666,12.1263433],[-10.1785085,12.1269307],[-10.1786909,12.1268245],[-10.179804,12.1255999],[-10.1812175,12.1235413],[-10.1819122,12.1230116],[-10.1821167,12.1229551],[-10.18291,12.1227362],[-10.1840875,12.1220046],[-10.1841518,12.1219128],[-10.1841411,12.1218236],[-10.1838729,12.1215431],[-10.1838246,12.1213228],[-10.1838943,12.1211628],[-10.1842108,12.1209897],[-10.1856887,12.1207511],[-10.1859221,12.1206357],[-10.1863003,12.1201322],[-10.1871049,12.1195841],[-10.188489,12.1180002],[-10.1887652,12.1178035],[-10.1891407,12.1172187],[-10.1895323,12.1168673],[-10.1898515,12.1163637],[-10.1902914,12.1162641],[-10.1914448,12.1166916],[-10.1916862,12.1167361],[-10.191839,12.1166575],[-10.1920375,12.1164188],[-10.192456,12.1155219],[-10.1934162,12.1150604],[-10.1947707,12.1147955],[-10.1956424,12.1140376],[-10.1957551,12.1138068],[-10.1959026,12.1131984],[-10.1957819,12.1121153],[-10.196034,12.1117692],[-10.1960823,12.1115095],[-10.19638,12.1112027],[-10.1966268,12.1106756],[-10.1966456,12.110235],[-10.1963022,12.10879],[-10.1963452,12.1086169],[-10.196844,12.1079114],[-10.1970962,12.1072637],[-10.1971257,12.1068965],[-10.1969138,12.1060599],[-10.1968789,12.1053912],[-10.1970103,12.1051158],[-10.1974475,12.104788],[-10.1979947,12.1040432],[-10.1981261,12.1036839],[-10.1981208,12.1035081],[-10.1976943,12.1031777],[-10.1976675,12.1029181],[-10.1977345,12.1027292],[-10.19811,12.1022782],[-10.1983568,12.1018507],[-10.1984024,12.1015596],[-10.1982334,12.1008882],[-10.1982576,12.1007623],[-10.1985446,12.1006521],[-10.1986223,12.1005026],[-10.1986143,12.1003033],[-10.198499,12.0999965],[-10.1985164,12.0997539],[-10.1989308,12.0989238],[-10.1991695,12.0987953],[-10.1992527,12.0985829],[-10.1996389,12.0983521],[-10.200111,12.0983573],[-10.2006233,12.098457],[-10.2008539,12.0985619],[-10.2011275,12.0985488],[-10.2015781,12.0983678],[-10.2018625,12.0981685],[-10.2019617,12.0979167],[-10.2019966,12.0975863],[-10.2017123,12.0965871],[-10.2017444,12.0961884],[-10.2019107,12.0958501],[-10.2024418,12.0956036],[-10.2037937,12.0953623],[-10.2045818,12.0956663],[-10.2057517,12.0961176],[-10.2064866,12.0961858],[-10.2073878,12.0959786],[-10.2075407,12.0959734],[-10.2079189,12.0962015],[-10.2079189,12.0963222],[-10.2082139,12.0966395],[-10.2091849,12.0971168],[-10.2093136,12.0974053],[-10.2094692,12.0975627],[-10.2096355,12.0975522],[-10.2105555,12.0970513],[-10.2108291,12.0967785],[-10.2117544,12.0962199],[-10.2123714,12.0962199],[-10.2126101,12.0960153],[-10.212763,12.0957373],[-10.212822,12.095121],[-10.2134013,12.0946253],[-10.2136025,12.0946725],[-10.2138439,12.0949269],[-10.2144688,12.0950738],[-10.2146968,12.0950213],[-10.2149919,12.0943473],[-10.2150106,12.0939277],[-10.2147988,12.0932405],[-10.214662,12.0930727],[-10.2146378,12.0927763],[-10.2147371,12.0925586],[-10.2148819,12.0925114],[-10.2151421,12.0925193],[-10.2152601,12.0924406],[-10.2156651,12.0917954],[-10.2166334,12.0913863],[-10.2168962,12.0911424],[-10.2169713,12.0907962],[-10.2174246,12.0898913],[-10.2176848,12.0897576],[-10.2181596,12.0898127],[-10.2185699,12.0901589],[-10.2187496,12.0901825],[-10.2188998,12.090109],[-10.2191386,12.089616],[-10.2193049,12.0891937],[-10.2194014,12.0882075],[-10.2199486,12.0876122],[-10.2200827,12.0873079],[-10.2199566,12.0860385],[-10.220021,12.0858418],[-10.2204475,12.0856399],[-10.2209061,12.0847849],[-10.2210054,12.0843547],[-10.2215552,12.0841213],[-10.2218476,12.0837567],[-10.221692,12.0832427],[-10.2218315,12.0825529],[-10.2224457,12.0812441],[-10.2223921,12.080709],[-10.2225745,12.0803156],[-10.223465,12.0796153],[-10.2235723,12.0793583],[-10.2235401,12.0791118],[-10.2234086,12.0789045],[-10.2226657,12.07854],[-10.2222928,12.0780495],[-10.222207,12.0777898],[-10.2223089,12.0776062],[-10.2226308,12.0773807],[-10.2230546,12.0772181],[-10.2233684,12.0768482],[-10.2236232,12.076704],[-10.2238432,12.076043],[-10.2238163,12.0757571],[-10.2234703,12.0753899],[-10.2231216,12.0751985],[-10.2223679,12.0734411],[-10.2221265,12.073213],[-10.2218503,12.0726779],[-10.2214345,12.0721638],[-10.2213058,12.0719172],[-10.2204502,12.0713297],[-10.2202785,12.0710753],[-10.2202651,12.0707238],[-10.2203617,12.0704747],[-10.2212709,12.0696432],[-10.2212977,12.069533],[-10.220823,12.0689245],[-10.2200612,12.0672511],[-10.2194631,12.0665639],[-10.2192485,12.0661573],[-10.2191531,12.0657431],[-10.219101,12.0655173],[-10.2188328,12.0651816],[-10.2185404,12.064893],[-10.2184975,12.0646806],[-10.2186745,12.0637363],[-10.2187765,12.0635684],[-10.2191976,12.063133],[-10.2193987,12.0629966],[-10.2195248,12.0627501],[-10.2195409,12.0625193],[-10.2194631,12.0623855],[-10.2192043,12.0621651],[-10.2190997,12.0619842],[-10.2189897,12.0616615],[-10.2185753,12.0611238],[-10.2185592,12.0610189],[-10.218645,12.0608602],[-10.2189991,12.0605468],[-10.2191721,12.0604838],[-10.2192807,12.0604576],[-10.2193907,12.0603487],[-10.2194604,12.0602084],[-10.2194537,12.0601559],[-10.2188784,12.0595421],[-10.2186665,12.0594792],[-10.2184439,12.0594425],[-10.2179611,12.0591828],[-10.2175373,12.0587736],[-10.2174783,12.0585506],[-10.2175775,12.057769],[-10.2174541,12.0570214],[-10.2176178,12.0566883],[-10.2175561,12.0565099],[-10.2171779,12.056342],[-10.2170894,12.0561427],[-10.2172235,12.0554555],[-10.2175105,12.0552246],[-10.217599,12.0550541],[-10.2176473,12.0547866],[-10.217603,12.0541374],[-10.2176379,12.0539262],[-10.2176298,12.0536849],[-10.2177157,12.0533439],[-10.2178042,12.0532678],[-10.2181676,12.0532324],[-10.2183218,12.0531655],[-10.2184251,12.0530816],[-10.2184412,12.0529963],[-10.2181005,12.0523419],[-10.2180938,12.0522409],[-10.2182736,12.0520651],[-10.218295,12.0519156],[-10.2182186,12.0516507],[-10.2178296,12.0510867],[-10.2177505,12.0510513],[-10.2176607,12.051067],[-10.2176097,12.0510461],[-10.2175064,12.0509018],[-10.2172677,12.050772],[-10.2170478,12.0506906],[-10.2168922,12.0504441],[-10.2160352,12.0494565],[-10.2155793,12.0491207],[-10.2151849,12.0489319],[-10.2148417,12.0483285],[-10.2138895,12.0474865],[-10.2136454,12.0471507],[-10.2128863,12.0464294],[-10.2126423,12.0460516],[-10.2116391,12.0453722],[-10.2114272,12.0449709],[-10.2109203,12.0446587],[-10.2107325,12.044685],[-10.2104241,12.0449525],[-10.2100915,12.044984],[-10.2098393,12.0449158],[-10.2068594,12.0429091],[-10.2062385,12.0422271],[-10.2059917,12.0420828],[-10.2057087,12.0416736],[-10.2047123,12.0413575],[-10.203858,12.0407463],[-10.203685,12.0406912],[-10.2028871,12.0404958],[-10.2028039,12.0404276],[-10.2027395,12.040303],[-10.2025652,12.0401797],[-10.2000198,12.0395645],[-10.1992312,12.0394727],[-10.1986854,12.0394438],[-10.1978378,12.0391763],[-10.1975428,12.0389428],[-10.197406,12.0387028],[-10.1972424,12.0382582],[-10.1964927,12.0371538],[-10.1964149,12.0369387],[-10.196325,12.0368311],[-10.1961279,12.0368154],[-10.1958033,12.0370043],[-10.1952454,12.0380929],[-10.1950443,12.0381703],[-10.1948411,12.0381442],[-10.1939835,12.0380339],[-10.1935785,12.0378647],[-10.1930246,12.037243],[-10.1927523,12.0365085],[-10.1923808,12.0360074],[-10.1922762,12.0357844],[-10.1919436,12.0356008],[-10.1915601,12.0355352],[-10.1905543,12.0356585],[-10.1902713,12.0355903],[-10.1898301,12.0352113],[-10.1896597,12.0348925],[-10.1896269,12.0344434],[-10.1896852,12.0341147],[-10.1898099,12.0338695],[-10.1901774,12.0336203],[-10.1903866,12.0333369],[-10.1905476,12.033253],[-10.1906347,12.033089],[-10.1906696,12.0325696],[-10.1905087,12.0320974],[-10.190455,12.0315374],[-10.190341,12.03122],[-10.1901385,12.0308632],[-10.1899923,12.0308173],[-10.189763,12.0308238],[-10.1896732,12.0308868],[-10.189582,12.0310652],[-10.1895243,12.0311124],[-10.189358,12.0311334],[-10.1891582,12.0312514],[-10.1889811,12.0314574],[-10.1889543,12.0315741],[-10.1889262,12.0318049],[-10.1888444,12.0319191],[-10.1886942,12.0319702],[-10.1885587,12.0319361],[-10.1884045,12.0317905],[-10.1883937,12.0317158],[-10.1884648,12.0316134],[-10.1884715,12.0315439],[-10.1883642,12.0314311],[-10.1882127,12.0313511],[-10.1881604,12.0312672],[-10.1881255,12.0310206],[-10.1881765,12.0304644],[-10.1882462,12.0303438],[-10.18832,12.0303149],[-10.1886874,12.0302782],[-10.1888618,12.0302087],[-10.1889503,12.0301365],[-10.1889637,12.030008],[-10.18889,12.0296893],[-10.1888953,12.0293915],[-10.1889919,12.0292289],[-10.1889905,12.0290413],[-10.1888524,12.0286885],[-10.1888511,12.028312],[-10.1886593,12.0278818],[-10.1882395,12.0275578],[-10.1881483,12.0272194],[-10.1882087,12.0268653],[-10.1883736,12.0266423],[-10.1884018,12.0264232],[-10.1882905,12.0262199],[-10.1882972,12.0261215],[-10.188379,12.0258828],[-10.1882704,12.0252178],[-10.1881416,12.0249607],[-10.1881845,12.0247456],[-10.1883066,12.0244911],[-10.1883173,12.0241488],[-10.1881979,12.0238235],[-10.1881604,12.0236805],[-10.1881215,12.0236517],[-10.1877527,12.023527],[-10.1876561,12.0233591],[-10.1876521,12.0230234],[-10.1877071,12.0228515],[-10.1877634,12.0228082],[-10.1879083,12.0227886],[-10.1879525,12.0227322],[-10.1880625,12.0224226],[-10.1884125,12.0220448],[-10.1885292,12.0216618],[-10.1890402,12.0210925],[-10.1892829,12.0209155],[-10.1894331,12.0208656],[-10.1894854,12.0208092],[-10.1896195,12.0204708],[-10.1895605,12.0197179],[-10.1896732,12.0192339],[-10.1900071,12.0187538],[-10.1902002,12.0183039],[-10.1901814,12.018174],[-10.1900929,12.0179812],[-10.1900084,12.0179353],[-10.1895149,12.0178985],[-10.1893875,12.0178198],[-10.1891086,12.0174263],[-10.1889181,12.0169895],[-10.1888108,12.0168492],[-10.1887666,12.0167167],[-10.1887666,12.0165396],[-10.1886794,12.0163652],[-10.1886566,12.0161881],[-10.1886755,12.0157617],[-10.1886874,12.0154942],[-10.1888631,12.0151676],[-10.188894,12.0150534],[-10.1889436,12.0150128],[-10.1890697,12.0148318],[-10.1891595,12.0146494],[-10.1894304,12.0145589],[-10.1904376,12.0137863],[-10.1905301,12.0136696],[-10.1905502,12.0136],[-10.1904765,12.013461],[-10.1904228,12.0134361],[-10.1903115,12.0134334],[-10.1902485,12.0133862],[-10.1902163,12.0131986],[-10.190105,12.0130544],[-10.1898663,12.0129966],[-10.1898207,12.0129232],[-10.1898368,12.0126936],[-10.190329,12.0123277],[-10.1906133,12.0122476],[-10.1913093,12.0122057],[-10.1914769,12.0121204],[-10.1915614,12.0119433],[-10.1915775,12.0117938],[-10.1915225,12.0116875],[-10.1908439,12.0116705],[-10.190683,12.011555],[-10.1906776,12.0114396],[-10.1908131,12.0111392],[-10.1909499,12.0104899],[-10.1910196,12.0099967],[-10.1911712,12.0095481],[-10.1910961,12.0090706],[-10.190455,12.0082166],[-10.190046,12.0069888],[-10.189826,12.0067999],[-10.1895605,12.0060365],[-10.1892561,12.0055092],[-10.1892293,12.0050408],[-10.1893915,12.0045883],[-10.1893714,12.0044952],[-10.189185,12.004423],[-10.1891287,12.0043207],[-10.1891515,12.0035061],[-10.1898193,12.0018349],[-10.18994,12.0017981],[-10.1900272,12.0018244],[-10.1901197,12.0019109],[-10.1902002,12.0019123],[-10.1902753,12.0018519],[-10.1903853,12.0016617],[-10.1904081,12.0015069],[-10.1905623,12.001377],[-10.19062,12.0012564],[-10.1905851,12.0009258],[-10.190447,12.0005637],[-10.1904845,12.0002135],[-10.1907635,11.9997622],[-10.1907782,11.9995589],[-10.1906978,11.9992283],[-10.1905328,11.9989633],[-10.1900916,11.9986013],[-10.1899628,11.9983652],[-10.1898649,11.9982707],[-10.1899105,11.9976187],[-10.1898046,11.9971176],[-10.1896665,11.9968002],[-10.1896665,11.9967201],[-10.1899374,11.9963948],[-10.190164,11.9959383],[-10.1901667,11.9957809],[-10.190396,11.9952522],[-10.1903799,11.9951079],[-10.1900661,11.9946016],[-10.1901412,11.9939404],[-10.1898301,11.9934681],[-10.1880276,11.9922639],[-10.1876923,11.9918756],[-10.187341,11.9916499],[-10.1870781,11.9912511],[-10.1866758,11.9908471],[-10.1864505,11.9904116],[-10.1864047,11.9897958],[-10.1863968,11.98969],[-10.1860428,11.9888295],[-10.185678,11.9883493],[-10.1857156,11.9880581],[-10.1858081,11.987801],[-10.1858054,11.9877249],[-10.1859757,11.9876357],[-10.1866061,11.9863396],[-10.1866382,11.9859565],[-10.1865256,11.9855918],[-10.1865256,11.9852743],[-10.1865886,11.9852094],[-10.1866476,11.9851812],[-10.1866771,11.9851241],[-10.1866758,11.9850185],[-10.1867147,11.9849227],[-10.1867154,11.9848473],[-10.1867804,11.9848132],[-10.1868475,11.9846131],[-10.1869547,11.9844793],[-10.1869494,11.9841933],[-10.1867643,11.9840438],[-10.1867643,11.9837499],[-10.1867616,11.9836292],[-10.186834,11.9835479],[-10.1868528,11.9834154],[-10.1868367,11.9833078],[-10.1871237,11.9823488],[-10.1870567,11.9818398],[-10.1871103,11.981239],[-10.1870352,11.9805384],[-10.1868729,11.9802105],[-10.1868649,11.9800465],[-10.1867925,11.9799573],[-10.1866128,11.9799218],[-10.1864666,11.9797749],[-10.1864344,11.9795361],[-10.1861353,11.9792711],[-10.1859248,11.9790153],[-10.1858135,11.9789812],[-10.1854004,11.9789222],[-10.1848894,11.9789366],[-10.1846132,11.9787752],[-10.1843356,11.9787621],[-10.1841585,11.978665],[-10.1840767,11.978425],[-10.1834719,11.9778648],[-10.1833324,11.9775867],[-10.1832654,11.977563],[-10.183138,11.977567],[-10.1830736,11.9775014],[-10.1829341,11.976608],[-10.1828523,11.9764125],[-10.1826364,11.9763692],[-10.1825237,11.9763836],[-10.1823655,11.9764689],[-10.182045,11.9764164],[-10.1817834,11.9762826],[-10.1817352,11.9762105],[-10.1817177,11.9759376],[-10.1816574,11.9758431],[-10.1814093,11.975708],[-10.1810391,11.9756765],[-10.1809278,11.9756057],[-10.1807079,11.9752829],[-10.1803941,11.9749917],[-10.1800132,11.9736273],[-10.1799354,11.9729923],[-10.1795894,11.9718641],[-10.179643,11.9714731],[-10.1798683,11.9706571],[-10.1798455,11.9704472],[-10.1796953,11.9702674],[-10.1794888,11.9700168],[-10.1793037,11.9699591],[-10.1792622,11.9699106],[-10.1793118,11.9692375],[-10.1790771,11.9689515],[-10.1789913,11.9685973],[-10.1788491,11.9684792],[-10.1780525,11.9682746],[-10.1776502,11.9680358],[-10.1772183,11.9675425],[-10.1766899,11.9673195],[-10.1763868,11.9670938],[-10.1765022,11.9660128],[-10.1766765,11.9657346],[-10.1774141,11.9652518],[-10.1675315,11.9586591],[-10.1678628,11.9576449],[-10.1680371,11.955509],[-10.1681685,11.9547165],[-10.1684904,11.9541786],[-10.168654,11.953638],[-10.1687881,11.9526934],[-10.1691127,11.9521476],[-10.1694426,11.9519639],[-10.1701131,11.9511557],[-10.1702419,11.9506965],[-10.1703894,11.9505863],[-10.17084,11.9504629],[-10.1711941,11.950211],[-10.1713429,11.9502241],[-10.1718405,11.9503186],[-10.1721275,11.9502989],[-10.1727766,11.9499853],[-10.173195,11.9499906],[-10.1735799,11.94982],[-10.1738441,11.9497977],[-10.1740909,11.949492],[-10.1746018,11.9491574],[-10.1748875,11.9491758],[-10.1752067,11.9490905],[-10.1756372,11.94863],[-10.1761776,11.9484529],[-10.1765585,11.9480435],[-10.1766121,11.9477129],[-10.1765531,11.9472773],[-10.1766926,11.9469676],[-10.177229,11.9468653],[-10.1774973,11.9465583],[-10.1775938,11.9462329],[-10.1776019,11.9458708],[-10.1773471,11.9455755],[-10.1773243,11.94538],[-10.1774248,11.9451268],[-10.1775268,11.9450546],[-10.177799,11.9450009],[-10.1780391,11.9448683],[-10.1781933,11.9446886],[-10.1782107,11.9446046],[-10.178196,11.9445206],[-10.1769018,11.9433568],[-10.1765156,11.9427953],[-10.1759684,11.9425224],[-10.1757538,11.9423282],[-10.1757968,11.942071],[-10.1760274,11.9416301],[-10.1761079,11.9411001],[-10.1760703,11.9405595],[-10.1763144,11.9399822],[-10.1764271,11.9393077],[-10.1761615,11.9381032],[-10.1761776,11.9375522],[-10.1759282,11.9370011],[-10.1752013,11.936101],[-10.1749733,11.9353924],[-10.1739138,11.93381],[-10.1737073,11.9324244],[-10.1738656,11.9318103],[-10.1737315,11.9290496],[-10.1742196,11.9273018],[-10.1741499,11.9265985],[-10.1737744,11.9260632],[-10.1726747,11.9251446],[-10.1711243,11.9226253],[-10.170266,11.9215388],[-10.1702392,11.9211294],[-10.1704162,11.9203526],[-10.1702124,11.9187622],[-10.1699603,11.9182163],[-10.1688713,11.9176442],[-10.1682866,11.9171298],[-10.1681256,11.916668],[-10.1680934,11.9164528],[-10.1681471,11.9163058],[-10.168477,11.9159672],[-10.1685119,11.9156471],[-10.1682866,11.9152481],[-10.1679701,11.9148965],[-10.1675892,11.9148519],[-10.1674148,11.9149542],[-10.1672351,11.9155893],[-10.1671171,11.9157337],[-10.1669911,11.915773],[-10.1664922,11.9154765],[-10.1662159,11.9154528],[-10.1660845,11.9153111],[-10.1660174,11.9150146],[-10.1660845,11.9146078],[-10.1664948,11.9146183],[-10.1666397,11.9144398],[-10.1667497,11.9142509],[-10.1670206,11.9141091],[-10.167793,11.9139622],[-10.1681525,11.9141485],[-10.1682973,11.9144293],[-10.168359,11.9145238],[-10.1685521,11.9145553],[-10.169346,11.9143558],[-10.1707917,11.9134845],[-10.1713389,11.9134399],[-10.1722482,11.9130174],[-10.1724762,11.912831],[-10.1731655,11.911406],[-10.1734123,11.9112144],[-10.1737556,11.9112065],[-10.1739004,11.911154],[-10.1739889,11.9110175],[-10.1742545,11.9108785],[-10.1745844,11.9108706],[-10.1747078,11.910763],[-10.1747802,11.9105898],[-10.1753944,11.9104953],[-10.1757753,11.9099966],[-10.1765853,11.909582],[-10.1767516,11.9090466],[-10.1767704,11.9088602],[-10.1770359,11.9086503],[-10.177103,11.9084666],[-10.1770923,11.9070572],[-10.1765209,11.9062646],[-10.1765102,11.906115],[-10.1766792,11.9053198],[-10.17658,11.9051334],[-10.1765558,11.9049812],[-10.176757,11.904354],[-10.1765397,11.9035824],[-10.1765639,11.9034196],[-10.1767597,11.9031283],[-10.1772451,11.9028291],[-10.1777065,11.9023724],[-10.1788598,11.9018921],[-10.1789698,11.9017609],[-10.1789966,11.9016507],[-10.1788303,11.9011415],[-10.178833,11.9006402],[-10.1790074,11.9001586],[-10.1793534,11.8998594],[-10.1797248,11.8992663],[-10.1797597,11.8990235],[-10.1797168,11.8986771],[-10.1797584,11.8982873],[-10.1795411,11.8977099],[-10.1793453,11.8971377],[-10.1793212,11.8970039],[-10.1794553,11.8967099],[-10.1794606,11.896538],[-10.1791643,11.8961089],[-10.1791482,11.8960407],[-10.1791683,11.8959462],[-10.1792407,11.8958372],[-10.1792648,11.8957191],[-10.1791951,11.8952861],[-10.1792635,11.895084],[-10.1795357,11.8947179],[-10.1796377,11.8942126],[-10.1797745,11.893962],[-10.1798067,11.8933806],[-10.1798657,11.8932441],[-10.1800776,11.8930591],[-10.1803257,11.8926247],[-10.1803713,11.8924909],[-10.1803444,11.8924174],[-10.180213,11.8922428],[-10.1801902,11.8921707],[-10.1801969,11.8920788],[-10.1802666,11.891962],[-10.1804075,11.8918518],[-10.180618,11.8917835],[-10.1808983,11.8919292],[-10.181074,11.8919344],[-10.1811826,11.8918714],[-10.1812175,11.8918124],[-10.1812081,11.8917245],[-10.1811424,11.8916313],[-10.1811411,11.8915197],[-10.1812443,11.8912888],[-10.1817513,11.8910211],[-10.181876,11.8908662],[-10.1867348,11.8866956],[-10.1871479,11.8866536],[-10.1874349,11.8859659],[-10.1888269,11.8854095],[-10.1891246,11.8850604],[-10.1893526,11.8846588],[-10.1897389,11.8844121],[-10.1900795,11.8843071],[-10.1903853,11.8843754],[-10.190447,11.8844383],[-10.1905087,11.8845748],[-10.190565,11.8846378],[-10.1912999,11.8848058],[-10.1917881,11.8848426],[-10.1920295,11.8848242],[-10.1923057,11.8846588],[-10.1922521,11.8845565],[-10.1921985,11.8843675],[-10.1923138,11.8838294],[-10.1923379,11.8836352],[-10.1922467,11.8833937],[-10.1917049,11.8829711],[-10.1914582,11.8827402],[-10.1913536,11.8824803],[-10.1913562,11.8816614],[-10.1911604,11.8811548],[-10.1912946,11.8797742],[-10.1912329,11.8794776],[-10.1909056,11.8788057],[-10.1908815,11.8786954],[-10.1910371,11.8770943],[-10.1910907,11.8769211],[-10.1914501,11.8767951],[-10.1915574,11.8766061],[-10.1915628,11.8759814],[-10.1918095,11.875026],[-10.1917344,11.8744905],[-10.1919758,11.8740915],[-10.1922709,11.8729051],[-10.1930648,11.8719654],[-10.1931989,11.8716609],[-10.1931614,11.8712305],[-10.1927269,11.869813],[-10.1915494,11.8680649],[-10.1911658,11.8677184],[-10.1909164,11.8675714],[-10.1905435,11.8674165],[-10.1893285,11.8674087],[-10.1876467,11.8666789],[-10.1865685,11.8656237],[-10.1862413,11.8654242],[-10.1853883,11.8653298],[-10.1842564,11.864411],[-10.1841357,11.8641774],[-10.1838729,11.8639779],[-10.1838112,11.8638703],[-10.1838005,11.8635973],[-10.1837334,11.8634267],[-10.183205,11.863054],[-10.1829851,11.8626865],[-10.1827383,11.86171],[-10.1825345,11.8614212],[-10.1818156,11.860933],[-10.1811934,11.8600064],[-10.1811639,11.8591585],[-10.1808567,11.8588816],[-10.180846,11.8588409],[-10.1808608,11.8587556],[-10.180842,11.8587005],[-10.1803243,11.8583291],[-10.1802707,11.8581243],[-10.1803538,11.8575704],[-10.1804021,11.8569562],[-10.1803672,11.8567541],[-10.1804236,11.8565966],[-10.1802921,11.8558721],[-10.180319,11.8557881],[-10.1804692,11.8556857],[-10.181239,11.8555466],[-10.1827759,11.8542997],[-10.1834545,11.8542472],[-10.1837763,11.8540871],[-10.1843262,11.8534492],[-10.1845086,11.8533626],[-10.1848465,11.8533757],[-10.1852837,11.8532812],[-10.1858416,11.8529504],[-10.1863056,11.8528297],[-10.187054,11.8521603],[-10.1873705,11.8514122],[-10.1872417,11.8509528],[-10.1872739,11.8506745],[-10.1875207,11.8504147],[-10.1878291,11.850307],[-10.1884595,11.8503963],[-10.1895833,11.8504435],[-10.1898381,11.8503412],[-10.1900634,11.8500052],[-10.1906106,11.8495641],[-10.1910692,11.848816],[-10.1912811,11.8487688],[-10.1921153,11.8483934],[-10.192582,11.8477896],[-10.1928288,11.8464666],[-10.1933089,11.8458313],[-10.1935181,11.8451068],[-10.193333,11.8440436],[-10.1934189,11.8433716],[-10.1934752,11.8432351],[-10.1936898,11.8432036],[-10.1942718,11.8434057],[-10.1945347,11.843348],[-10.1946983,11.8431616],[-10.1947895,11.8424502],[-10.1949558,11.8418096],[-10.1950523,11.841765],[-10.1956478,11.84187],[-10.1957846,11.8418306],[-10.1961198,11.8415077],[-10.1963639,11.8409643],[-10.1963183,11.8403579],[-10.1964471,11.839846],[-10.1967099,11.83951],[-10.1967394,11.8393],[-10.1972356,11.8390349],[-10.1982898,11.8387618],[-10.1989362,11.8387986],[-10.1996014,11.8386437],[-10.199942,11.8387277],[-10.2011517,11.8382368],[-10.2020824,11.8380609],[-10.2030855,11.8382158],[-10.2034825,11.8381948],[-10.2037829,11.8380373],[-10.2041075,11.8374991],[-10.2047619,11.837066],[-10.2058643,11.8368665],[-10.2061111,11.8367378],[-10.2065563,11.83605],[-10.2071142,11.8359713],[-10.208289,11.8349895],[-10.2103838,11.8342439],[-10.2106977,11.8338396],[-10.2109256,11.8337241],[-10.2117303,11.833711],[-10.2118993,11.8336559],[-10.2125001,11.8330258],[-10.2126852,11.8323643],[-10.2129936,11.8321017],[-10.2137178,11.8318891],[-10.2141309,11.8319626],[-10.2143616,11.8319705],[-10.2150455,11.831708],[-10.2159306,11.831112],[-10.2160621,11.8308364],[-10.2161264,11.8291562],[-10.2158716,11.8277648],[-10.2159977,11.8273159],[-10.2162096,11.8259797],[-10.2164564,11.8254362],[-10.2164295,11.8252866],[-10.2160835,11.8249847],[-10.2157053,11.8243257],[-10.2156571,11.8240291],[-10.215928,11.8230761],[-10.2163571,11.822551],[-10.21651,11.8222045],[-10.21651,11.8216847],[-10.2165636,11.8214694],[-10.2169794,11.820926],[-10.2170545,11.8207606],[-10.2169874,11.8199625],[-10.2165395,11.8185947],[-10.2165502,11.8182849],[-10.2166387,11.8180617],[-10.217261,11.817681],[-10.2174944,11.8173056],[-10.217438,11.8169722],[-10.2165234,11.8154285],[-10.2165422,11.8152788],[-10.2169526,11.8149191],[-10.2172235,11.8144571],[-10.2171752,11.8136458],[-10.2172315,11.8134358],[-10.2176982,11.812937],[-10.217945,11.8124066],[-10.2183446,11.8120128],[-10.2187523,11.8118238],[-10.2187845,11.8117109],[-10.218747,11.8115376],[-10.2187872,11.8114274],[-10.218865,11.8113854],[-10.2189562,11.8112777],[-10.2190179,11.8104271],[-10.2191734,11.81007],[-10.220198,11.8090619],[-10.2206969,11.8083845],[-10.2220488,11.807035],[-10.2224082,11.8057328],[-10.2231914,11.8047955],[-10.2244198,11.8041575],[-10.2245164,11.8039763],[-10.2244896,11.8038398],[-10.2241597,11.8036245],[-10.2240846,11.8034827],[-10.2241033,11.8031309],[-10.2240041,11.8029288],[-10.2240121,11.8023459],[-10.2241141,11.8021516],[-10.2242053,11.8021096],[-10.2243984,11.8021674],[-10.2246022,11.8022041],[-10.224731,11.8021043],[-10.2248597,11.8018838],[-10.2248436,11.8015005],[-10.2245432,11.8007076],[-10.2250636,11.7998149],[-10.2250759,11.7991058],[-10.22479,11.798313],[-10.2247979,11.797458],[-10.2252982,11.797287],[-10.225854,11.7975357],[-10.2265528,11.7974036],[-10.2270848,11.7969372],[-10.2272356,11.796533],[-10.2269498,11.796362],[-10.2264734,11.7955459],[-10.2262748,11.7945588],[-10.2264654,11.7939525],[-10.226386,11.793012],[-10.2266401,11.792569],[-10.2265845,11.7919394],[-10.2260843,11.7910922],[-10.2260446,11.7905714],[-10.2271245,11.7896309],[-10.2272277,11.7891801],[-10.2268386,11.7887448],[-10.226639,11.7884693],[-10.226521,11.7880996],[-10.2270212,11.7858766],[-10.2274825,11.7848567],[-10.2278311,11.7842287],[-10.2283314,11.783879],[-10.2291731,11.7840189],[-10.2303403,11.7840422],[-10.2306023,11.7837935],[-10.231039,11.7824565],[-10.2309596,11.7817802],[-10.2316981,11.7809408],[-10.2321348,11.7808553],[-10.2334529,11.7796815],[-10.2343898,11.7783368],[-10.2367719,11.778329],[-10.2376612,11.7775595],[-10.238622,11.7769065],[-10.2396543,11.7766889],[-10.2404721,11.7769843],[-10.2413932,11.7768055],[-10.2419172,11.7764324],[-10.2421951,11.7751809],[-10.2428621,11.7741859],[-10.2434577,11.772538],[-10.2437276,11.7722737],[-10.2445455,11.7724291],[-10.245546,11.7731055],[-10.2458318,11.7729655],[-10.246078,11.7721027],[-10.2460224,11.7702682],[-10.2462526,11.7694753],[-10.2462368,11.7685891],[-10.2466655,11.7675553],[-10.2476184,11.7664671],[-10.2475866,11.765954],[-10.2469196,11.7658219],[-10.2466576,11.7654254],[-10.2471578,11.7649045],[-10.248206,11.7630701],[-10.2472769,11.7620673],[-10.2472372,11.7613909],[-10.247936,11.7607923],[-10.2484124,11.7602715],[-10.2483409,11.7596419],[-10.2459906,11.7580948],[-10.245141,11.7567267],[-10.2455142,11.7561747],[-10.2459986,11.7560037],[-10.2464353,11.7561747],[-10.2466576,11.7559882],[-10.2466497,11.7554673],[-10.2445455,11.7521868],[-10.2440929,11.7506165],[-10.2437753,11.7504221],[-10.2431003,11.7504998],[-10.2423937,11.7503444],[-10.2419649,11.7496758],[-10.2413694,11.7490694],[-10.2406785,11.7490384],[-10.2402418,11.7494037],[-10.2393208,11.7498857],[-10.2384394,11.7499091],[-10.2381218,11.749707],[-10.237566,11.7486575],[-10.2377962,11.7482144],[-10.2383123,11.7478645],[-10.2386855,11.7472116],[-10.2391381,11.7465896],[-10.2394637,11.7457423],[-10.2391302,11.7451048],[-10.2386935,11.7450659],[-10.2382568,11.7448093],[-10.2382965,11.7443507],[-10.2389873,11.7436355],[-10.2389714,11.7431456],[-10.2385585,11.7424693],[-10.2381853,11.7423682],[-10.2375501,11.7427569],[-10.2371928,11.742788],[-10.2358191,11.7420573],[-10.2345089,11.7420728],[-10.2338737,11.7417852],[-10.2334132,11.7410622],[-10.2325953,11.7399349],[-10.2318648,11.7392041],[-10.2314281,11.7392974],[-10.2308802,11.7397172],[-10.2304197,11.7398416],[-10.2289745,11.7406579],[-10.2284425,11.7407046],[-10.2268545,11.7412487],[-10.2258461,11.7413343],[-10.2254014,11.7412411],[-10.2246153,11.7412954],[-10.2238769,11.7411555],[-10.2231146,11.7410544],[-10.222797,11.7412254],[-10.2223206,11.7419096],[-10.2217251,11.742135],[-10.2213122,11.7428658],[-10.2207722,11.7435266],[-10.2200735,11.7439852],[-10.2196129,11.7439541],[-10.2185807,11.7427958],[-10.217739,11.7414042],[-10.2168021,11.739072],[-10.2162939,11.7384267],[-10.215611,11.7372994],[-10.2158016,11.7365842],[-10.2158175,11.7358146],[-10.2156745,11.7345162],[-10.2153887,11.7340731],[-10.2149282,11.7339876],[-10.2147376,11.7338632],[-10.2147614,11.7335989],[-10.2148964,11.7335522],[-10.2150234,11.7333967],[-10.2144835,11.7321684],[-10.2149679,11.7290586],[-10.2151584,11.7288642],[-10.2161748,11.7276281],[-10.2175008,11.7267496],[-10.2177787,11.7261742],[-10.2174611,11.7254201],[-10.2174849,11.7249147],[-10.220939,11.7235231],[-10.2210184,11.7232043],[-10.2205975,11.7227923],[-10.219343,11.7211596],[-10.2194859,11.7208797],[-10.2201291,11.7206309],[-10.2209151,11.7198379],[-10.2208754,11.7194258],[-10.2197797,11.7189127],[-10.2197241,11.7181196],[-10.2200655,11.7172178],[-10.2208011,11.7163274],[-10.2216456,11.7153051],[-10.2235434,11.7129338],[-10.2237816,11.7117364],[-10.2236942,11.7107179],[-10.2238292,11.7094273],[-10.2251553,11.7059907],[-10.2249568,11.7057263],[-10.2251791,11.7049177],[-10.2244962,11.7032538],[-10.2241627,11.7031916],[-10.223599,11.7029739],[-10.2226858,11.7028184],[-10.2223762,11.7025774],[-10.2226699,11.7011156],[-10.222932,11.6999415],[-10.2229796,11.6983165],[-10.2227096,11.6975623],[-10.2226699,11.6970724],[-10.2232628,11.6968935],[-10.2245888,11.6961004],[-10.2256528,11.6951129],[-10.2270979,11.6931457],[-10.2271456,11.6926092],[-10.2276617,11.691334],[-10.2279872,11.6912018],[-10.2285828,11.6913729],[-10.2300041,11.6914506],[-10.2301549,11.6910385],[-10.2297103,11.6898178],[-10.22975,11.6889236],[-10.2300835,11.6887058],[-10.2308299,11.6889469],[-10.2317748,11.6889313],[-10.2324418,11.6886514],[-10.2324973,11.6877494],[-10.2331881,11.686482],[-10.2342363,11.6855334],[-10.2348794,11.6853234],[-10.2380863,11.6839844],[-10.2385478,11.6837916],[-10.2393975,11.6837216],[-10.2401597,11.6840793],[-10.2401835,11.6846236],[-10.2404694,11.6854245],[-10.2405885,11.6864664],[-10.2409696,11.6868319],[-10.2419225,11.6866764],[-10.2431612,11.6861632],[-10.2437805,11.6855722],[-10.2439314,11.6849968],[-10.2435344,11.6833406],[-10.2439234,11.6831462],[-10.2444157,11.683916],[-10.2450033,11.684126],[-10.2476474,11.6839316],[-10.2485606,11.6836439],[-10.2505377,11.6811478],[-10.2513556,11.6809534],[-10.2525784,11.6804169],[-10.2536027,11.6802847],[-10.2546428,11.68114],[-10.2557783,11.6812567],[-10.2565406,11.6808135],[-10.2574855,11.6794138],[-10.2580413,11.6791028],[-10.258351,11.6794605],[-10.2590894,11.6797404],[-10.2605107,11.6794216],[-10.2626228,11.6783096],[-10.2628055,11.6777342],[-10.2625276,11.6762568],[-10.2632501,11.675417],[-10.2636551,11.6744838],[-10.2632581,11.6734341],[-10.2628213,11.6728275],[-10.2625355,11.6721588],[-10.263656,11.6706161],[-10.2640461,11.6696032],[-10.2646468,11.6682325],[-10.2646716,11.6676685],[-10.2643929,11.6673046],[-10.264009,11.6673046],[-10.2631853,11.6676018],[-10.2626775,11.6675896],[-10.2623183,11.667159],[-10.2620396,11.6658672],[-10.2616886,11.6652461],[-10.2615161,11.6649404],[-10.261446,11.6634433],[-10.2621332,11.6612182],[-10.262042,11.6606756],[-10.2607846,11.6588935],[-10.2608013,11.6585821],[-10.2614922,11.6579791],[-10.2619418,11.6579175],[-10.2625891,11.6582697],[-10.2636501,11.6586307],[-10.2639198,11.6584194],[-10.2641715,11.6572571],[-10.2654123,11.6556369],[-10.2657,11.6548532],[-10.2641356,11.6529335],[-10.2643424,11.6509082],[-10.2646031,11.6503711],[-10.26472,11.6491295],[-10.2641895,11.648152],[-10.2641086,11.6475356],[-10.2645491,11.6472539],[-10.2650976,11.6474476],[-10.2654842,11.6474388],[-10.2657719,11.6470249],[-10.2652684,11.6455367],[-10.264213,11.6436853],[-10.2636989,11.64218],[-10.263945,11.6409908],[-10.2646556,11.6405958],[-10.2651743,11.639749],[-10.2651628,11.6393313],[-10.2647363,11.6391393],[-10.2640331,11.63932],[-10.2626152,11.6392974],[-10.2621195,11.6386764],[-10.2602751,11.6343069],[-10.260247,11.6339125],[-10.2604364,11.633494],[-10.2615777,11.632331],[-10.2616007,11.6314842],[-10.260448,11.6306035],[-10.260033,11.629847],[-10.2615684,11.6281339],[-10.2617737,11.6279049],[-10.2627766,11.6272162],[-10.2639524,11.6269903],[-10.265059,11.6263693],[-10.2653242,11.6256128],[-10.2650936,11.6246079],[-10.2643443,11.6239078],[-10.261935,11.6207463],[-10.2619161,11.6198319],[-10.2627142,11.6181591],[-10.2634913,11.6171556],[-10.2651051,11.6140165],[-10.2660619,11.6115436],[-10.2662233,11.6099628],[-10.2671686,11.6063494],[-10.2673014,11.6061543],[-10.2679755,11.6051637],[-10.2688286,11.6036167],[-10.2699352,11.6031425],[-10.2703272,11.6027359],[-10.2697739,11.6020358],[-10.2684136,11.5989418],[-10.2662694,11.5964236],[-10.2661657,11.5957347],[-10.2668458,11.5943684],[-10.2680793,11.5934085],[-10.2682291,11.5923018],[-10.2684366,11.5918727],[-10.2693127,11.5915565],[-10.2699007,11.5910935],[-10.2699237,11.590416],[-10.2699814,11.5896255],[-10.2701427,11.5866894],[-10.2700275,11.5841711],[-10.2696586,11.5830192],[-10.2680793,11.5805686],[-10.2676989,11.5793829],[-10.268356,11.5760288],[-10.2683214,11.5742219],[-10.2657161,11.5682703],[-10.265889,11.5678863],[-10.2663617,11.567796],[-10.2672839,11.567988],[-10.2689093,11.5678186],[-10.2693358,11.5673668],[-10.2692782,11.5665763],[-10.268794,11.565605],[-10.2660617,11.5631923],[-10.2642636,11.562951],[-10.2610589,11.5638545],[-10.2603557,11.5634931],[-10.2600791,11.562951],[-10.2600214,11.5617765],[-10.2596756,11.5589191],[-10.2592491,11.5588852],[-10.2582808,11.5600372],[-10.2571511,11.5611214],[-10.2559868,11.5615619],[-10.2542576,11.5617539],[-10.2524939,11.5617539],[-10.2516293,11.5620475],[-10.2510529,11.5626912],[-10.2490651,11.5646524],[-10.2477791,11.5659212],[-10.2472257,11.5660568],[-10.2466955,11.5655485],[-10.2464534,11.5649274],[-10.2447242,11.5624767],[-10.2459462,11.5599243],[-10.2457617,11.5588401],[-10.2447934,11.5572363],[-10.2439634,11.5570443],[-10.2430412,11.5572363],[-10.240459,11.5570895],[-10.2391842,11.5573183],[-10.237358,11.5574622],[-10.2369714,11.5570342],[-10.2383158,11.5541952],[-10.2379764,11.5474812],[-10.2374021,11.5471998],[-10.2342563,11.5475707],[-10.230732,11.5471487],[-10.2297009,11.5468034],[-10.2258365,11.5462221],[-10.2228189,11.5456071],[-10.2223924,11.5450876],[-10.2229342,11.5426141],[-10.2222771,11.5404455],[-10.2227843,11.5393499],[-10.2233146,11.5389885],[-10.2240178,11.5390224],[-10.2260697,11.5403326],[-10.2267844,11.5405359],[-10.2274069,11.5404907],[-10.2279256,11.5401631],[-10.2289631,11.5385367],[-10.2294127,11.5372378],[-10.2319257,11.5350127],[-10.2322255,11.5343463],[-10.2311869,11.5332689],[-10.2295885,11.5326205],[-10.2265853,11.5307053],[-10.2265853,11.5302564],[-10.2272063,11.529638],[-10.2282549,11.5293886],[-10.2292424,11.5288798],[-10.2293544,11.5275033],[-10.2289675,11.527194],[-10.2282636,11.5270917],[-10.2246573,11.5280185],[-10.2242287,11.5277144],[-10.224273,11.5270917],[-10.2258545,11.525658],[-10.2270221,11.5233698],[-10.2272143,11.5212554],[-10.2272734,11.5199085],[-10.226697,11.5185761],[-10.2262388,11.5184458],[-10.2256623,11.519141],[-10.2243026,11.520343],[-10.2226768,11.5208354],[-10.2213909,11.5210237],[-10.2199868,11.5210526],[-10.2193069,11.5213712],[-10.2188339,11.5223271],[-10.2160257,11.5244415],[-10.2156266,11.5241084],[-10.2142225,11.518721],[-10.213587,11.5184313],[-10.2118429,11.5181851],[-10.2111335,11.5184458],[-10.2106457,11.5189816],[-10.2106753,11.5196913],[-10.2111335,11.5209368],[-10.211636,11.5233263],[-10.2116065,11.5239491],[-10.2110448,11.524456],[-10.2096259,11.5245573],[-10.206729,11.5242966],[-10.2054875,11.5237898],[-10.2044123,11.522714],[-10.2005953,11.5167803],[-10.2000336,11.5168382],[-10.1996346,11.5172872],[-10.1990877,11.5189092],[-10.1982452,11.520314],[-10.1974028,11.5222112],[-10.1959543,11.5232394],[-10.1952892,11.5232684],[-10.1945798,11.5227615],[-10.1943299,11.521953],[-10.1944372,11.5208597],[-10.1944587,11.519472],[-10.1942656,11.5185048],[-10.1931498,11.5181684],[-10.1920554,11.5184207],[-10.1912761,11.5187519],[-10.190115,11.5187726],[-10.1891967,11.5184106],[-10.1890384,11.5181004],[-10.189165,11.5178211],[-10.1896189,11.5178935],[-10.1899461,11.5177177],[-10.1904105,11.5160215],[-10.1912339,11.5142839],[-10.191065,11.5138288],[-10.1904317,11.513653],[-10.1879195,11.5139529],[-10.1866951,11.5144184],[-10.1856607,11.5154009],[-10.1849113,11.5166731],[-10.184468,11.5167144],[-10.1836024,11.5158974],[-10.182473,11.5151941],[-10.1811009,11.5137874],[-10.179412,11.5131462],[-10.1788104,11.5133324],[-10.1783987,11.5139012],[-10.1780504,11.5152561],[-10.1785676,11.515825],[-10.1796442,11.517304],[-10.1796548,11.517728],[-10.1790531,11.5181728],[-10.1784726,11.5182658],[-10.1774171,11.517666],[-10.1755699,11.5157319],[-10.1744511,11.5137978],[-10.1736911,11.5133634],[-10.1730895,11.5134358],[-10.1726039,11.5144494],[-10.1709362,11.5155974],[-10.170562,11.5156011],[-10.1705926,11.5144749],[-10.1702555,11.5105108],[-10.1694893,11.5092044],[-10.16952,11.5086639],[-10.1706846,11.5070722],[-10.1719871,11.5032731],[-10.1717573,11.5015462],[-10.1713895,11.5010357],[-10.1700103,11.5011558],[-10.1674512,11.5009906],[-10.1648921,11.501351],[-10.1640646,11.5017415],[-10.1634363,11.5016814],[-10.1628694,11.5008484],[-10.1621491,11.4997893],[-10.1616281,11.4997143],[-10.1606934,11.5001948],[-10.1587166,11.5004951],[-10.1578891,11.5002849],[-10.1574753,11.4999245],[-10.1577358,11.4982577],[-10.1587625,11.4969062],[-10.1610458,11.4962605],[-10.1617507,11.4956298],[-10.161858,11.4950291],[-10.1610152,11.4944435],[-10.1593295,11.493122],[-10.1582568,11.4914401],[-10.1572914,11.4894279],[-10.1570922,11.4873856],[-10.1574447,11.4854934],[-10.1574294,11.4843071],[-10.1569083,11.4838565],[-10.1561268,11.4840518],[-10.1543492,11.484232],[-10.1538282,11.4839917],[-10.1531999,11.4828204],[-10.1498593,11.4786906],[-10.1476373,11.4767083],[-10.1462888,11.4761076],[-10.143791,11.4759123],[-10.1420441,11.4763779],[-10.141661,11.4770387],[-10.1419828,11.4787807],[-10.1420594,11.481619],[-10.1416303,11.48249],[-10.1408948,11.48255],[-10.1403738,11.4822046],[-10.1398681,11.4813637],[-10.1404504,11.479922],[-10.1404351,11.4783602],[-10.1401592,11.4775042],[-10.1390253,11.4759574],[-10.1377534,11.4747109],[-10.1369872,11.4745007],[-10.1320835,11.4759574],[-10.1272258,11.4785554],[-10.1270572,11.4792612],[-10.1274097,11.4810633],[-10.1273331,11.4815739],[-10.1267967,11.4815889],[-10.1238239,11.4794264],[-10.1194249,11.4772433],[-10.1183662,11.4767177],[-10.116697,11.4744678],[-10.1162463,11.4742628],[-10.1158762,11.4743312],[-10.1135749,11.4770439],[-10.1133335,11.47809],[-10.1134354,11.4787787],[-10.1141059,11.4797881],[-10.1142025,11.4802507],[-10.1140362,11.480645],[-10.1133657,11.4809814],[-10.1119655,11.4812653],[-10.10975,11.4818068],[-10.1089884,11.48175],[-10.1085592,11.4816659],[-10.1080443,11.4808037],[-10.1069659,11.4792098],[-10.1054263,11.4764919],[-10.1043856,11.4752354],[-10.1032323,11.4743837],[-10.1019288,11.473675],[-10.1011993,11.4733596],[-10.1007057,11.4733596],[-10.1001478,11.4738222],[-10.0996972,11.4745162],[-10.0992466,11.4749788],[-10.0989033,11.4752522],[-10.098281,11.4752522],[-10.0971652,11.4745162],[-10.0965,11.4737802],[-10.0965,11.472897],[-10.0970365,11.472224],[-10.0976373,11.471509],[-10.098354,11.4706963],[-10.0987424,11.4700785],[-10.0994054,11.4688983],[-10.1000298,11.4675445],[-10.1003088,11.4668926],[-10.1005319,11.4661645],[-10.1004997,11.465439],[-10.1002766,11.4646635],[-10.1001028,11.4642823],[-10.0997916,11.4640615],[-10.0994483,11.4639984],[-10.0990943,11.464072],[-10.0986672,11.464296],[-10.0980235,11.4649479],[-10.0973154,11.4654106],[-10.096779,11.4655998],[-10.0963284,11.4656419],[-10.0954486,11.4656839],[-10.0944615,11.465747],[-10.0938607,11.465726],[-10.0935389,11.4659153],[-10.0934101,11.4668616],[-10.0932599,11.4684598],[-10.0930453,11.4687542],[-10.0923673,11.4692663],[-10.0908781,11.4701842],[-10.0896765,11.4707099],[-10.0880028,11.4711095],[-10.0867368,11.471467],[-10.0860287,11.4718035],[-10.0852777,11.4723502],[-10.0847841,11.472918],[-10.0841833,11.4738433],[-10.0838829,11.4744741],[-10.0835181,11.4749368],[-10.0830031,11.4753573],[-10.0821234,11.4755676],[-10.080793,11.4754415],[-10.0798489,11.4746844],[-10.0786258,11.4733596],[-10.0778318,11.4723376],[-10.0776044,11.4718318],[-10.0773598,11.4708571],[-10.0771452,11.4699108],[-10.0767375,11.4685019],[-10.0763727,11.4673873],[-10.0759007,11.4667985],[-10.0740982,11.4663148],[-10.0729824,11.4662728],[-10.0719095,11.4665041],[-10.0695706,11.4670719],[-10.0681416,11.4675419],[-10.0672618,11.4677312],[-10.0662232,11.4680813],[-10.0656224,11.4680392],[-10.0655795,11.4674925],[-10.0657941,11.4668616],[-10.066352,11.465747],[-10.0665666,11.4650741],[-10.0664378,11.4646325],[-10.0659958,11.4645557],[-10.0653435,11.4647166],[-10.0643993,11.4652213],[-10.0637985,11.4655788],[-10.0627277,11.4660469],[-10.0626184,11.4656419],[-10.0621248,11.4653895],[-10.0616098,11.4653895],[-10.0598289,11.4655788],[-10.0579835,11.4658732],[-10.0555802,11.4665462],[-10.0535847,11.4669667],[-10.0530697,11.4670719],[-10.0527907,11.4668616],[-10.0527478,11.4662307],[-10.0528766,11.4655788],[-10.0537134,11.4646535],[-10.054443,11.4635389],[-10.0548507,11.4624875],[-10.0546361,11.4618566],[-10.0538422,11.4605527],[-10.0529624,11.4598587],[-10.0521256,11.4595222],[-10.0515891,11.459312],[-10.050645,11.4590386],[-10.0499583,11.458618],[-10.0490357,11.457945],[-10.0488425,11.4570617],[-10.0489069,11.4564729],[-10.0493361,11.4560102],[-10.0499798,11.455842],[-10.0508252,11.4558704],[-10.0513831,11.4558914],[-10.0519754,11.4560523],[-10.0524903,11.4563677],[-10.0530268,11.4567673],[-10.0536705,11.4571879],[-10.054443,11.45723],[-10.0548507,11.4567673],[-10.0549365,11.4563467],[-10.0545932,11.455842],[-10.0540997,11.4553793],[-10.0537778,11.4548115],[-10.0528337,11.4534656],[-10.0518466,11.4527716],[-10.0505591,11.4519934],[-10.0498296,11.4515939],[-10.047598,11.45029],[-10.0461389,11.4487127],[-10.0459028,11.4485234],[-10.0453664,11.4486706],[-10.0442506,11.4490071],[-10.0434352,11.4495118],[-10.0425554,11.4502269],[-10.0406672,11.4520145],[-10.0393153,11.4527716],[-10.0387789,11.4527505],[-10.0381781,11.4527085],[-10.0375558,11.4525823],[-10.0372125,11.4527295],[-10.0368262,11.4529819],[-10.0365258,11.4535076],[-10.0362898,11.4542647],[-10.0361396,11.4551901],[-10.0362254,11.4576085],[-10.0362254,11.4589965],[-10.0361181,11.4595853],[-10.0357104,11.4597746],[-10.0348521,11.4596905],[-10.0342728,11.4596274],[-10.0340367,11.4593961],[-10.0337792,11.4588493],[-10.033629,11.4579029],[-10.0338651,11.4569986],[-10.0340153,11.4557789],[-10.0339509,11.4550639],[-10.0336934,11.4546853],[-10.0324703,11.45376],[-10.0313974,11.4533814],[-10.0303117,11.4531154],[-10.0296808,11.453066],[-10.0285221,11.4529819],[-10.0281573,11.4525402],[-10.0280286,11.4521407],[-10.0283075,11.4519303],[-10.0287882,11.4518746],[-10.0292946,11.451699],[-10.029831,11.4514256],[-10.0303675,11.4511312],[-10.0314275,11.4508021],[-10.0327149,11.4502763],[-10.0330497,11.4500797],[-10.0329424,11.4497432],[-10.0328566,11.448923],[-10.0322772,11.4483762],[-10.0315262,11.4481448],[-10.030861,11.4480186],[-10.0301744,11.4479345],[-10.0294877,11.4479766],[-10.0280715,11.4479766],[-10.0258614,11.4476191],[-10.0252606,11.4472826],[-10.0247456,11.4464413],[-10.0236512,11.4440228],[-10.0226213,11.4418986],[-10.0215269,11.4404895],[-10.020733,11.4399848],[-10.0198318,11.4395852],[-10.0191237,11.4392487],[-10.0184585,11.4391225],[-10.0178577,11.4393749],[-10.0173427,11.4397955],[-10.0165702,11.4405316],[-10.0160767,11.4412887],[-10.0152184,11.4418776],[-10.0127507,11.4427609],[-10.011356,11.4428871],[-10.0105406,11.4429922],[-10.0098754,11.4431184],[-10.0092796,11.443164],[-10.0085021,11.4432236],[-10.0079228,11.4427609],[-10.0074721,11.4422562],[-10.0073863,11.4416252],[-10.0076438,11.4404054],[-10.00803,11.4391856],[-10.0089184,11.4383938],[-10.0093175,11.438134],[-10.0104762,11.4378185],[-10.0113989,11.437461],[-10.011871,11.4371666],[-10.0124289,11.4367249],[-10.0139738,11.4352527],[-10.0156261,11.4337594],[-10.018716,11.4311515],[-10.0198103,11.4302261],[-10.0198532,11.4297844],[-10.019703,11.4286486],[-10.0193597,11.4274708],[-10.0185658,11.4270712],[-10.0179435,11.4270712],[-10.0171496,11.4270712],[-10.0157763,11.4270502],[-10.0152613,11.4270081],[-10.0142828,11.4261952],[-10.0126649,11.4238322],[-10.0113774,11.4223599],[-10.0104333,11.4214976],[-10.0096823,11.4212452],[-10.0091244,11.4212031],[-10.0082661,11.42114],[-10.0076438,11.4211611],[-10.007043,11.4213924],[-10.0061632,11.421771],[-10.0050689,11.4219183],[-10.0048114,11.42175],[-10.0043608,11.4211611],[-10.0042008,11.4205767],[-10.0041247,11.4202987],[-10.0041462,11.4197939],[-10.0045196,11.4193596],[-10.0049831,11.4189316],[-10.0059057,11.4180482],[-10.0067211,11.4170807],[-10.0072361,11.41666],[-10.0079871,11.4151877],[-10.0080944,11.414746],[-10.0079442,11.4135261],[-10.0075365,11.4126006],[-10.0071932,11.4112755],[-10.0065709,11.4090459],[-10.0063993,11.4073632],[-10.0063778,11.4061643],[-10.0063349,11.4054912],[-10.0056697,11.4048392],[-10.0043822,11.4035561],[-10.0037385,11.4029882],[-10.0028802,11.4024834],[-10.0018931,11.4018523],[-10.0005628,11.4006955],[-10.0005628,11.4002327],[-10.0010348,11.4000224],[-10.0015284,11.399833],[-10.0023652,11.3997068],[-10.0034038,11.4001139],[-10.0040904,11.4004925],[-10.0046612,11.4007796],[-10.0051762,11.4007796],[-10.0069014,11.4007659],[-10.0085322,11.4010394],[-10.0093604,11.4010741],[-10.0102187,11.4011172],[-10.0111929,11.4017545],[-10.0116221,11.4027642],[-10.0124374,11.4042786],[-10.0130941,11.404693],[-10.0139601,11.4049279],[-10.0143926,11.4049501],[-10.0148944,11.4046206],[-10.0152199,11.4043832],[-10.0156215,11.4042493],[-10.0159908,11.4042675],[-10.0163448,11.4047593],[-10.0179218,11.4064668],[-10.0185952,11.4074148],[-10.0189761,11.4082771],[-10.0190672,11.4087188],[-10.0191397,11.4091922],[-10.0193674,11.4095927],[-10.0201787,11.4101044],[-10.0207008,11.410191],[-10.0216727,11.4100493],[-10.0235763,11.4095769],[-10.0245723,11.4091911],[-10.0252631,11.4086163],[-10.0257048,11.4080416],[-10.0263065,11.4067864],[-10.0270549,11.4048144],[-10.0279453,11.4032369],[-10.0281841,11.4026822],[-10.0282243,11.4021747],[-10.0281251,11.4016094],[-10.0278837,11.4007679],[-10.0275807,11.4001606],[-10.0274786,11.3997793],[-10.0274599,11.3994297],[-10.027492,11.3988644],[-10.027425,11.3986172],[-10.0272909,11.3984148],[-10.0269691,11.3980992],[-10.0267626,11.3979389],[-10.0261483,11.3976076],[-10.0253996,11.3971918],[-10.0248153,11.3970146],[-10.0244866,11.3969607],[-10.0242573,11.3968031],[-10.0240749,11.3965638],[-10.0239703,11.3960484],[-10.0240454,11.3956092],[-10.0242063,11.3953937],[-10.0244518,11.3951997],[-10.0251908,11.3949004],[-10.0258012,11.3948296],[-10.0271756,11.3950361],[-10.0287009,11.3952834],[-10.0291712,11.3953227],[-10.0296621,11.3953819],[-10.0301261,11.3954831],[-10.0307214,11.3956304],[-10.0327811,11.3960343],[-10.0334317,11.3959477],[-10.0340341,11.3957036],[-10.0350463,11.3949713],[-10.0367886,11.3935479],[-10.0376808,11.392987],[-10.038741,11.3924438],[-10.0405081,11.3915068],[-10.0415844,11.3911525],[-10.0438977,11.3905225],[-10.0446607,11.3902077],[-10.0454317,11.3896565],[-10.0460663,11.3889544],[-10.0464518,11.3882077],[-10.0468576,11.3875792],[-10.0471151,11.3866116],[-10.047142,11.385686],[-10.0470158,11.3848368],[-10.0467249,11.3839399],[-10.0464164,11.3832801],[-10.0463828,11.3831249],[-10.0464204,11.3829198],[-10.0465304,11.382749],[-10.0466752,11.3825464],[-10.0468066,11.3822941],[-10.0468335,11.3819943],[-10.0467718,11.3818128],[-10.0466834,11.3816682],[-10.0465062,11.3815078],[-10.0462595,11.381396],[-10.0459041,11.3812555],[-10.0457472,11.3811489],[-10.045609,11.3810188],[-10.0454749,11.3806625],[-10.0454722,11.3804442],[-10.0455017,11.3802063],[-10.0457069,11.3795358],[-10.0458062,11.3786549],[-10.0458089,11.3778082],[-10.0457376,11.3772785],[-10.0455728,11.3764514],[-10.0453771,11.3753101],[-10.0453824,11.3738324],[-10.0453985,11.3727911],[-10.0454682,11.3717656],[-10.0455809,11.3707926],[-10.0457419,11.3702035],[-10.0462675,11.3691518],[-10.0470462,11.3678763],[-10.0478447,11.3661856],[-10.0482738,11.3652284],[-10.0490786,11.3637662],[-10.0509077,11.3603688],[-10.0519485,11.3587646],[-10.0533996,11.3568831],[-10.0553435,11.3549143],[-10.0572712,11.3527015],[-10.0588776,11.3504336],[-10.0606688,11.3480237],[-10.061599,11.3471782],[-10.062492,11.3465511],[-10.0629562,11.3461894],[-10.0634719,11.3457479],[-10.0638897,11.345543],[-10.0648213,11.3452281],[-10.0655765,11.3452595],[-10.0662511,11.3452202],[-10.0674559,11.3450548],[-10.0682993,11.3448501],[-10.0691989,11.3444406],[-10.0700664,11.3438026],[-10.0714318,11.3423458],[-10.0718816,11.3418732],[-10.0725001,11.3416134],[-10.0729982,11.3416999],[-10.0734398,11.3419441],[-10.073986,11.3425663],[-10.074725,11.3437633],[-10.0755844,11.345866],[-10.0758736,11.3467953],[-10.0759006,11.3474464],[-10.0756247,11.3487403],[-10.075231,11.349646],[-10.0745564,11.3508036],[-10.0734479,11.3520873],[-10.0723314,11.3531426],[-10.0712311,11.3539851],[-10.0695437,11.355141],[-10.0690877,11.3556302],[-10.0686372,11.3564873],[-10.0682938,11.3570134],[-10.0676808,11.3574501],[-10.0659458,11.3590645],[-10.064741,11.3598756],[-10.0628374,11.3609544],[-10.0623154,11.3613717],[-10.0620021,11.3618915],[-10.0618994,11.3626461],[-10.061862,11.3639924],[-10.0616688,11.3652757],[-10.0615615,11.3662329],[-10.0614238,11.3672856],[-10.061084,11.3690098],[-10.0608213,11.3701047],[-10.0604082,11.3725175],[-10.0603437,11.3735957],[-10.0604886,11.3745266],[-10.0609821,11.3770341],[-10.0615025,11.3800591],[-10.0616849,11.3816156],[-10.0617493,11.3820626],[-10.0616808,11.3830108],[-10.0612953,11.3846406],[-10.060733,11.3863573],[-10.0606046,11.3870265],[-10.0606446,11.3874518],[-10.0609659,11.3880738],[-10.0613193,11.388373],[-10.0619961,11.3887834],[-10.0626773,11.3890885],[-10.0631332,11.3892304],[-10.0637448,11.3892147],[-10.0643992,11.3890254],[-10.0649518,11.3887572],[-10.0653863,11.3883944],[-10.0661641,11.387553],[-10.0666255,11.3869166],[-10.066867,11.3863223],[-10.0673605,11.3842503],[-10.0675428,11.3822205],[-10.0674462,11.3801432],[-10.0674382,11.3792123],[-10.0675508,11.3788126],[-10.0677649,11.3784821],[-10.068208,11.378171],[-10.0686962,11.3781131],[-10.0693506,11.3782762],[-10.0704075,11.3786522],[-10.0715822,11.3789046],[-10.0724968,11.3790454],[-10.0732124,11.3790266],[-10.0736738,11.379011],[-10.0741249,11.3788836],[-10.0744335,11.3786837],[-10.0747499,11.378334],[-10.0752783,11.3778634],[-10.0760803,11.3772822],[-10.0763941,11.3770693],[-10.0771719,11.376751],[-10.0779123,11.3764039],[-10.078851,11.3758412],[-10.0794303,11.3756152],[-10.0799239,11.3755048],[-10.0811524,11.3752996],[-10.0819731,11.3751839],[-10.0825042,11.3751208],[-10.0835314,11.3751682],[-10.0848645,11.3751997],[-10.085449,11.3751257],[-10.0860931,11.3750156],[-10.0877452,11.3745423],[-10.0911088,11.373969],[-10.0925812,11.3736246],[-10.0933296,11.3733144],[-10.0939143,11.3729173],[-10.0942308,11.3725701],[-10.0943649,11.3722704],[-10.0944293,11.3718838],[-10.0944829,11.3714946],[-10.0945902,11.3711318],[-10.0949926,11.3706558],[-10.0959384,11.3700876],[-10.0969381,11.3696539],[-10.0994611,11.3690466],[-10.1007485,11.3688099],[-10.101682,11.3687941],[-10.102771,11.3690097],[-10.1035917,11.3694989],[-10.1046539,11.3703245],[-10.1056141,11.3711976],[-10.1064939,11.3725648],[-10.107792,11.3747527],[-10.1087362,11.3763041],[-10.1095463,11.3772349],[-10.1106459,11.3782394],[-10.1116812,11.3791229],[-10.1123223,11.3794911],[-10.113017,11.3797381],[-10.1134435,11.3799432],[-10.1137626,11.3802641],[-10.1140148,11.3808426],[-10.1143849,11.3814684],[-10.1145673,11.3815],[-10.1149052,11.3814421],[-10.1152486,11.3811616],[-10.1158678,11.3803899],[-10.1169702,11.3789436],[-10.1177323,11.3777976],[-10.1185155,11.3768458],[-10.1199247,11.3755789],[-10.1232861,11.3730987],[-10.1253558,11.3719888],[-10.1267182,11.3716418],[-10.1283361,11.3710363],[-10.129655,11.3701155],[-10.1323793,11.3673232],[-10.1336709,11.3657448],[-10.1350861,11.3640971],[-10.1356876,11.3630391],[-10.1361831,11.361426],[-10.1365899,11.3594661],[-10.1366961,11.3580437],[-10.1365368,11.3570898],[-10.1360238,11.3558583],[-10.1351747,11.3548002],[-10.1325563,11.3527361],[-10.1293542,11.3507414],[-10.1285148,11.3500708],[-10.1281205,11.3498289],[-10.1279032,11.3495843],[-10.1276404,11.3492294],[-10.1270342,11.3485036],[-10.1264495,11.3479512],[-10.1259774,11.3475569],[-10.1249744,11.3470466],[-10.1245397,11.3468889],[-10.1243171,11.3467206],[-10.1238775,11.3464343],[-10.1235554,11.3461499],[-10.1234213,11.345908],[-10.1233864,11.3455372],[-10.1234706,11.345064],[-10.1237892,11.3445782],[-10.1242071,11.3441855],[-10.1248683,11.3437761],[-10.1254344,11.3435462],[-10.1266994,11.3432816],[-10.1277785,11.3431039],[-10.128641,11.3430996],[-10.1303548,11.3432072],[-10.1319404,11.3431733],[-10.1329135,11.3431862],[-10.1343951,11.343273],[-10.1353652,11.3434544],[-10.1368564,11.3438383],[-10.1383585,11.3441328],[-10.139689,11.3444852],[-10.1412338,11.3452795],[-10.1433689,11.3460052],[-10.144431,11.3462525],[-10.1452652,11.3462735],[-10.1459679,11.3461762],[-10.1464051,11.3460473],[-10.1467431,11.3460553],[-10.1471321,11.3461656],[-10.1473546,11.3463708],[-10.1476121,11.3466416],[-10.1478428,11.3467258],[-10.1486013,11.3468549],[-10.1495964,11.3469417],[-10.1528372,11.3474747],[-10.1541944,11.3479225],[-10.1582225,11.3500075],[-10.1598801,11.3506759],[-10.1607995,11.3509765],[-10.16145,11.3510439],[-10.1624195,11.3511236],[-10.1629888,11.3511419],[-10.1637205,11.3514241],[-10.1643398,11.3518656],[-10.1648526,11.3522704],[-10.1650152,11.3526016],[-10.1650715,11.3529082],[-10.1649402,11.353503],[-10.1645899,11.3541653],[-10.1640583,11.3550055],[-10.1629324,11.3563485],[-10.1621006,11.357213],[-10.1613812,11.3579613],[-10.1609308,11.3586543],[-10.1605118,11.359568],[-10.1601052,11.3601996],[-10.1596112,11.3607146],[-10.1587979,11.3612176],[-10.1576783,11.3619166],[-10.1552015,11.3636152],[-10.1535251,11.3648785],[-10.1522117,11.3658289],[-10.1509293,11.3665342],[-10.1497847,11.3669941],[-10.1487465,11.3675091],[-10.148196,11.367963],[-10.1477143,11.3685517],[-10.1472202,11.3692446],[-10.14682,11.3700785],[-10.1464383,11.3710045],[-10.1462757,11.3718078],[-10.1462444,11.3725559],[-10.1460757,11.3748983],[-10.1460756,11.3756955],[-10.146282,11.3767318],[-10.1467011,11.3779029],[-10.1470513,11.3785285],[-10.1474579,11.3790313],[-10.1481897,11.379577],[-10.1486963,11.3798959],[-10.1491029,11.3800492],[-10.1499349,11.3803495],[-10.1510857,11.3806746],[-10.1524681,11.381116],[-10.153475,11.3815883],[-10.1540255,11.3819255],[-10.1543257,11.3823118],[-10.1546384,11.3826184],[-10.1551951,11.3829189],[-10.1557956,11.3830845],[-10.156296,11.3830722],[-10.1568214,11.3828698],[-10.1579973,11.3822873],[-10.1588167,11.3816251],[-10.1596866,11.3811934],[-10.159855,11.38111],[-10.1602428,11.380969],[-10.1607308,11.3809014],[-10.161181,11.3810548],[-10.1617877,11.381527],[-10.1622443,11.3817171],[-10.1628574,11.3817844],[-10.1637705,11.3816925],[-10.1643522,11.3815638],[-10.1648902,11.3813001],[-10.1657658,11.3811284],[-10.1663663,11.3810609],[-10.166823,11.380883],[-10.1672107,11.3805152],[-10.1683116,11.3800369],[-10.1699378,11.3791662],[-10.1717956,11.3779826],[-10.1734782,11.3771671],[-10.17603,11.3760696],[-10.1770121,11.3755729],[-10.1779566,11.3748737],[-10.1789511,11.3739234],[-10.1793076,11.3733899],[-10.1795765,11.3731875],[-10.1799707,11.3731384],[-10.1805273,11.3732672],[-10.1810026,11.3736229],[-10.1814781,11.3742912],[-10.1820347,11.3753705],[-10.1824725,11.3766582],[-10.1832295,11.3798958],[-10.1837611,11.3818886],[-10.1842614,11.3831519],[-10.1845554,11.3836731],[-10.1849057,11.3841514],[-10.1852872,11.38455],[-10.1858502,11.3849363],[-10.1869635,11.3859419],[-10.1872889,11.3864814],[-10.1874702,11.3872418],[-10.1874577,11.3880144],[-10.1873263,11.3889157],[-10.1866509,11.3926805],[-10.1866758,11.3937413],[-10.1867509,11.3946243],[-10.1870825,11.3960283],[-10.1874326,11.3971198],[-10.1875577,11.3978495],[-10.1875391,11.3987139],[-10.1876828,11.4001059],[-10.1879017,11.4008907],[-10.1881144,11.4012218],[-10.1886398,11.401559],[-10.1890778,11.402123],[-10.1894029,11.4028282],[-10.1897219,11.4039625],[-10.1897344,11.4043427],[-10.1895718,11.4046308],[-10.189503,11.4049251],[-10.1896594,11.4052501],[-10.1901973,11.4057529],[-10.1905976,11.4059613],[-10.1911105,11.4060778],[-10.1916923,11.406231],[-10.1926805,11.4067216],[-10.1932934,11.4067094],[-10.1939815,11.4068749],[-10.1944193,11.4068381],[-10.1949447,11.4065377],[-10.1955327,11.4057529],[-10.1960956,11.4045695],[-10.1965461,11.4036681],[-10.1970151,11.4024971],[-10.1975441,11.4009784],[-10.1980806,11.3997689],[-10.1986852,11.398389],[-10.1992543,11.3969972],[-10.1995983,11.3964208],[-10.2000549,11.3960284],[-10.2007305,11.3957585],[-10.2026632,11.395078],[-10.206191,11.3942747],[-10.2077109,11.3939927],[-10.2089118,11.3940295],[-10.2101504,11.3941827],[-10.2117303,11.3941842],[-10.2126771,11.3941054],[-10.2139163,11.3938581],[-10.2143724,11.393724],[-10.2151716,11.3933455],[-10.2157046,11.3928829],[-10.2160353,11.3925855],[-10.2163732,11.3924331],[-10.2169472,11.3924541],[-10.2175374,11.3925802],[-10.2178967,11.392959],[-10.2183366,11.3937898],[-10.2190341,11.3949835],[-10.2195075,11.3959671],[-10.2196701,11.3968255],[-10.2198015,11.3981744],[-10.2196139,11.3994926],[-10.2192511,11.4009765],[-10.218807,11.4019637],[-10.2183566,11.4029324],[-10.2180064,11.404128],[-10.2175998,11.4054463],[-10.2172308,11.406838],[-10.2171182,11.4077823],[-10.2172245,11.4082728],[-10.2174872,11.4088124],[-10.2180878,11.409315],[-10.2203697,11.4104989],[-10.222266,11.4114611],[-10.2226549,11.411653],[-10.2231647,11.4118633],[-10.223878,11.4123577],[-10.2245781,11.4128572],[-10.2248704,11.4132068],[-10.2249725,11.4134487],[-10.225085,11.4138852],[-10.2251549,11.4140902],[-10.2253621,11.4144224],[-10.2258549,11.4148005],[-10.2264487,11.4149855],[-10.2274663,11.4149618],[-10.2292013,11.4143457],[-10.2307888,11.413646],[-10.231576,11.4132989],[-10.2340919,11.4123314],[-10.2356477,11.4116845],[-10.2365756,11.4114533],[-10.2375627,11.4113691],[-10.238716,11.4114848],[-10.2395031,11.4117076],[-10.2407272,11.4120858],[-10.2426828,11.4125564],[-10.2441381,11.4129814],[-10.2448946,11.4133679],[-10.2455798,11.413922],[-10.2461323,11.4143296],[-10.2466419,11.4146292],[-10.2469451,11.4148027],[-10.247106,11.4150525],[-10.2472508,11.4152419],[-10.2476263,11.4154548],[-10.2478597,11.4155258],[-10.248152,11.4155521],[-10.2486938,11.4155468],[-10.2490667,11.4155837],[-10.2493697,11.4157493],[-10.2496621,11.4160831],[-10.2498364,11.4162015],[-10.2500162,11.4162225],[-10.250169,11.4162172],[-10.2503648,11.4161567],[-10.250625,11.4160306],[-10.2509335,11.4156862],[-10.2512714,11.415234],[-10.2513948,11.4148607],[-10.2515772,11.4143348],[-10.2521164,11.4136512],[-10.2540191,11.4116323],[-10.254188,11.4111542],[-10.2542444,11.4105839],[-10.2540879,11.4099034],[-10.2537877,11.4088611],[-10.253425,11.4081191],[-10.2528557,11.4071933],[-10.2519863,11.4063228],[-10.2511043,11.405826],[-10.2499785,11.4054336],[-10.2491466,11.4051025],[-10.2484336,11.4046182],[-10.2474327,11.403674],[-10.2463695,11.4025335],[-10.2457377,11.4020308],[-10.2445258,11.4014095],[-10.2430934,11.4009468],[-10.2419883,11.4006787],[-10.2414156,11.4002404],[-10.2412131,11.3997584],[-10.2412668,11.3993745],[-10.2416158,11.3989098],[-10.2422404,11.3984122],[-10.2426159,11.3979389],[-10.2430129,11.397204],[-10.2433322,11.3969081],[-10.2440831,11.3964165],[-10.244582,11.3960984],[-10.2449629,11.3958643],[-10.2452472,11.3957355],[-10.2456013,11.3956986],[-10.2460519,11.3956513],[-10.2465186,11.3955752],[-10.2478516,11.3952544],[-10.2489406,11.3949914],[-10.2507726,11.3948336],[-10.2525455,11.3947101],[-10.253731,11.394505],[-10.254297,11.3942946],[-10.2547583,11.3940081],[-10.2553577,11.3934895],[-10.2559393,11.3926496],[-10.2566975,11.3916889],[-10.2571455,11.3911868],[-10.2578408,11.3907672],[-10.2581973,11.3905035],[-10.2585476,11.3901602],[-10.2586301,11.3899574],[-10.2586636,11.3897367],[-10.2586212,11.389377],[-10.2586039,11.3889461],[-10.2587666,11.3883022],[-10.2593282,11.3874381],[-10.2604783,11.3866663],[-10.2615927,11.3863368],[-10.2631402,11.3862276],[-10.2636982,11.3863381],[-10.2640897,11.3864802],[-10.2644942,11.3868744],[-10.2657767,11.38834],[-10.2670348,11.38983],[-10.268231,11.3917863],[-10.2691753,11.3926802],[-10.2707922,11.3937336],[-10.2719687,11.394358],[-10.2728798,11.395147],[-10.2738484,11.3961854],[-10.2742643,11.3967425],[-10.2743994,11.3969506],[-10.2746954,11.3974059],[-10.2750885,11.3983255],[-10.2762331,11.4006922],[-10.2772239,11.4020648],[-10.2789841,11.4040852],[-10.2792353,11.4044322],[-10.2802888,11.4058214],[-10.281077,11.4071947],[-10.2815398,11.4078202],[-10.2822779,11.4082862],[-10.2830785,11.4085069],[-10.2848049,11.4085681],[-10.2868064,11.4089361],[-10.2879573,11.4090219],[-10.2887704,11.4088134],[-10.2891207,11.4084456],[-10.2910097,11.4059562],[-10.2921188,11.4045121],[-10.2935491,11.4028538],[-10.2952004,11.4004135],[-10.2955633,11.3994324],[-10.2964264,11.39606],[-10.2969392,11.3935707],[-10.2972396,11.3905661],[-10.2975522,11.3887513],[-10.2980026,11.3875249],[-10.2989409,11.3856485],[-10.2994162,11.3843977],[-10.2996413,11.3831959],[-10.2995539,11.3819694],[-10.2990659,11.38013],[-10.2986782,11.3777752],[-10.2983153,11.3744641],[-10.2979928,11.3736404],[-10.2978274,11.3732131],[-10.2977809,11.3729382],[-10.2978238,11.3726675],[-10.2981152,11.3721338],[-10.2995002,11.3702352],[-10.3001668,11.3693866],[-10.3007922,11.3688961],[-10.3016054,11.3684792],[-10.3039197,11.3678904],[-10.30482,11.3677001],[-10.3071096,11.3672159],[-10.3087753,11.3670007],[-10.3104115,11.3666221],[-10.312965,11.3658121],[-10.3145529,11.3650084],[-10.3152535,11.3648488],[-10.3168672,11.3648366],[-10.3182683,11.3646649],[-10.3196318,11.3642357],[-10.3206201,11.3638555],[-10.3211296,11.3638241],[-10.3216125,11.3638925],[-10.3239834,11.3646026],[-10.3260619,11.3649837],[-10.3287014,11.3652168],[-10.3298398,11.3653762],[-10.3303777,11.3657565],[-10.3307905,11.3664065],[-10.3309781,11.3672037],[-10.3306997,11.368426],[-10.3299327,11.3702561],[-10.3292137,11.3712081],[-10.3272076,11.3728173],[-10.3264833,11.3733012],[-10.3253728,11.3738271],[-10.3227228,11.3745423],[-10.3212504,11.3748683],[-10.3204536,11.3752549],[-10.320054,11.3756808],[-10.3195846,11.3763935],[-10.3189167,11.377327],[-10.3184983,11.3775584],[-10.3178492,11.3778345],[-10.3173208,11.3781973],[-10.3169078,11.3786812],[-10.316079,11.3799223],[-10.3157437,11.3805612],[-10.3155775,11.3811291],[-10.3153253,11.3822573],[-10.3151053,11.3827831],[-10.3150597,11.3830907],[-10.3150785,11.3833985],[-10.3152072,11.3840873],[-10.3152609,11.3848131],[-10.3152019,11.3857018],[-10.3146386,11.3869272],[-10.3144348,11.3873793],[-10.3143328,11.3878316],[-10.3141881,11.3887834],[-10.3141151,11.3897323],[-10.3141776,11.3907134],[-10.3144278,11.3918048],[-10.3145904,11.3931415],[-10.3145154,11.3944046],[-10.3142777,11.3961828],[-10.3139627,11.4009416],[-10.3140003,11.4013359],[-10.3141022,11.4017146],[-10.3145742,11.4025822],[-10.3148049,11.403371],[-10.3148317,11.4042965],[-10.3147782,11.4056479],[-10.3146708,11.4070046],[-10.3145404,11.4080777],[-10.3139734,11.4100651],[-10.313673,11.4117162],[-10.31348,11.413525],[-10.3133082,11.4157441],[-10.3131259,11.417311],[-10.3126645,11.418715],[-10.3126002,11.4193932],[-10.3126264,11.4200212],[-10.312871,11.4205185],[-10.313386,11.4210444],[-10.3139573,11.4213467],[-10.3151053,11.4216175],[-10.317868,11.4231357],[-10.3184688,11.4234788],[-10.3188014,11.4235998],[-10.319252,11.4235367],[-10.3196704,11.4232265],[-10.3200513,11.4226954],[-10.3206253,11.4216123],[-10.3207487,11.4211784],[-10.3208132,11.4206815],[-10.3209418,11.4194931],[-10.321253,11.4188674],[-10.3229643,11.4169692],[-10.3230929,11.4164118],[-10.3231306,11.4159228],[-10.3229696,11.4145819],[-10.3228757,11.4137011],[-10.3228865,11.4131779],[-10.3231996,11.4118454],[-10.3233075,11.4112376],[-10.3237824,11.4100335],[-10.32441,11.4089135],[-10.3247881,11.4079432],[-10.3249706,11.4069309],[-10.3249867,11.4053956],[-10.3241874,11.3997688],[-10.3237475,11.3954147],[-10.3236885,11.3913708],[-10.3242481,11.388549],[-10.3247774,11.3876738],[-10.3252978,11.3869903],[-10.32614,11.3863014],[-10.326789,11.3860488],[-10.3275294,11.3858858],[-10.3297235,11.3858964],[-10.3305817,11.3860541],[-10.3312845,11.3864222],[-10.3316599,11.3867903],[-10.331998,11.3874424],[-10.3332049,11.3909185],[-10.3335698,11.3917179],[-10.3350771,11.3932691],[-10.3355921,11.3939948],[-10.3360641,11.3951202],[-10.3365792,11.3957645],[-10.3382796,11.3968503],[-10.3390038,11.3972342],[-10.3398247,11.3978443],[-10.3404899,11.3984595],[-10.3418791,11.3990536],[-10.3429146,11.3992325],[-10.3446473,11.3992061],[-10.3465301,11.398959],[-10.3471122,11.3987803],[-10.3477183,11.3983069],[-10.3479784,11.3978966],[-10.3479946,11.3974918],[-10.3478874,11.3970396],[-10.3475761,11.3958248],[-10.3471954,11.394171],[-10.3472489,11.3933191],[-10.3474636,11.3915917],[-10.3479008,11.3903295],[-10.3480402,11.3900692],[-10.3481823,11.3899088],[-10.3486196,11.3894409],[-10.3494385,11.3882741],[-10.3496361,11.3876738],[-10.3498722,11.3868639],[-10.3502585,11.3849551],[-10.3504837,11.3836455],[-10.3508324,11.3827673],[-10.3524926,11.3794542],[-10.3527179,11.3789914],[-10.3528387,11.3786365],[-10.3529245,11.3781158],[-10.3529836,11.3776451],[-10.3529888,11.3757203],[-10.352828,11.3739059],[-10.3524309,11.3731854],[-10.3519964,11.3728015],[-10.351637,11.3725701],[-10.351181,11.3723913],[-10.3508109,11.3722177],[-10.350548,11.3720284],[-10.3503281,11.3718233],[-10.3502101,11.3715761],[-10.3497327,11.3705296],[-10.3479625,11.3677317],[-10.3470826,11.3668481],[-10.3465516,11.3662014],[-10.3461492,11.3652546],[-10.3454063,11.3630195],[-10.3444515,11.3610235],[-10.3434617,11.3599218],[-10.3432471,11.3594431],[-10.3431345,11.3587122],[-10.3432793,11.3572394],[-10.3448243,11.3528006],[-10.3452105,11.3511332],[-10.3454922,11.3504496],[-10.3461466,11.3494792],[-10.3481261,11.3462997],[-10.3487027,11.3458001],[-10.349207,11.3454951],[-10.3509612,11.3447271],[-10.3538498,11.3437489],[-10.3560413,11.3425103],[-10.3567447,11.3416178],[-10.3579349,11.3406352],[-10.3584124,11.3404222],[-10.3587958,11.3404248],[-10.3592224,11.3406168],[-10.359614,11.3409691],[-10.3598232,11.3415451],[-10.3598769,11.3420159],[-10.3598634,11.3423893],[-10.3597964,11.3426996],[-10.359791,11.3429547],[-10.3598286,11.3430994],[-10.3599359,11.3433123],[-10.3608585,11.3454792],[-10.3621728,11.3483721],[-10.3626664,11.3496816],[-10.3632886,11.3513804],[-10.3634013,11.3526481],[-10.3635354,11.3532476],[-10.3640182,11.3536263],[-10.3644903,11.3537841],[-10.3650374,11.3536947],[-10.3664773,11.3528455],[-10.3671671,11.3524719],[-10.3680415,11.3521983],[-10.3687872,11.3521589],[-10.3703241,11.3523639],[-10.3716008,11.3526928],[-10.372038,11.3528716],[-10.3723518,11.3531082],[-10.3728802,11.3538025],[-10.3734569,11.354381],[-10.3739048,11.3547255],[-10.3744573,11.3548833],[-10.3747658,11.354907],[-10.3755088,11.3548097],[-10.3758226,11.3547018],[-10.376351,11.3543732],[-10.3767131,11.3540997],[-10.3769169,11.3540313],[-10.3773354,11.3540024],[-10.3783492,11.3540734],[-10.3802938,11.3538893],[-10.3818871,11.3536316],[-10.3828071,11.3535764],[-10.3831665,11.3535947],[-10.383424,11.3537289],[-10.383601,11.3538341],[-10.3837753,11.3540655],[-10.3839738,11.3542496],[-10.3843574,11.3544941],[-10.3853873,11.3548912],[-10.3857199,11.3549833],[-10.3858996,11.354978],[-10.3860981,11.354907],[-10.3863556,11.3547334],[-10.3867982,11.3546046],[-10.3871978,11.3546151],[-10.3878174,11.3547361],[-10.3883753,11.3548937],[-10.3886623,11.35507],[-10.3888152,11.3552751],[-10.3890647,11.3554145],[-10.3897567,11.355567],[-10.3934849,11.3563034],[-10.3948931,11.3564454],[-10.395797,11.3564926],[-10.3969264,11.3562338],[-10.3976316,11.3558537],[-10.3981305,11.3554908],[-10.3982861,11.3551831],[-10.3983961,11.3548544],[-10.3984095,11.3542521],[-10.3981302,11.352987],[-10.3979401,11.3526165],[-10.3976799,11.3523877],[-10.3970415,11.3520906],[-10.396422,11.3516645],[-10.3961752,11.3513279],[-10.3958594,11.3504182],[-10.3950031,11.3477461],[-10.3929378,11.3437278],[-10.3917254,11.3415714],[-10.3913392,11.3409508],[-10.3908081,11.3404353],[-10.389408,11.3396042],[-10.3879274,11.3389942],[-10.3865917,11.3385734],[-10.385193,11.3382415],[-10.3827776,11.3379317],[-10.3818522,11.3377424],[-10.3815598,11.3375819],[-10.3812849,11.3373584],[-10.3806774,11.336459],[-10.380605,11.3361381],[-10.3805916,11.3357884],[-10.3807364,11.3355226],[-10.3812702,11.33496],[-10.381584,11.3345655],[-10.381769,11.3340132],[-10.3821499,11.3325982],[-10.3822733,11.3309467],[-10.3823216,11.3293635],[-10.3824611,11.3289269],[-10.3826456,11.3285307],[-10.3831799,11.328038],[-10.3838022,11.3276803],[-10.3851325,11.3272778],[-10.3858809,11.3272227],[-10.3868009,11.3272674],[-10.3872649,11.3273331],[-10.3876404,11.3275199],[-10.388394,11.3281274],[-10.3902207,11.3297212],[-10.3906445,11.3300894],[-10.3909637,11.3302891],[-10.3919185,11.3306022],[-10.3930236,11.3309704],[-10.3938309,11.3313858],[-10.3951184,11.3321433],[-10.3955449,11.3326036],[-10.3959955,11.3333768],[-10.3966714,11.3341498],[-10.3975082,11.3348653],[-10.397975,11.3351756],[-10.3986133,11.3353334],[-10.3990264,11.3351388],[-10.399241,11.3348232],[-10.3993322,11.3343972],[-10.3991766,11.3314306],[-10.3994555,11.3298105],[-10.3995092,11.328656],[-10.3994341,11.3277145],[-10.3992866,11.3272332],[-10.3989781,11.3265021],[-10.3987957,11.326026],[-10.3987555,11.3249083],[-10.3989218,11.3243692],[-10.3991524,11.3239458],[-10.400346,11.3227544],[-10.4011775,11.3215418],[-10.4014618,11.320574],[-10.4016871,11.3185963],[-10.4017891,11.3179743],[-10.4021538,11.3172944],[-10.4024945,11.3166343],[-10.4031355,11.315982],[-10.4035244,11.3158216],[-10.4040743,11.3158373],[-10.4052706,11.3162924],[-10.4070247,11.317013],[-10.4074767,11.3171286],[-10.4079903,11.3171287],[-10.4087065,11.3170998],[-10.4095085,11.316934],[-10.4106243,11.3165133],[-10.411563,11.3162344],[-10.4118581,11.316245],[-10.412027,11.3162845],[-10.4122255,11.3164265],[-10.4123623,11.3167184],[-10.4125112,11.3171392],[-10.4125353,11.3172851],[-10.4125192,11.3174166],[-10.4124361,11.3176612],[-10.4124079,11.3179597],[-10.4124669,11.3181991],[-10.4126118,11.3184437],[-10.4128398,11.3187856],[-10.412947,11.319088],[-10.4129765,11.3193827],[-10.4128156,11.3210659],[-10.4129497,11.3215366],[-10.4132314,11.3219732],[-10.4137839,11.3224045],[-10.4139126,11.3225596],[-10.4139824,11.3227675],[-10.414154,11.3242666],[-10.4144303,11.3264205],[-10.4145832,11.3279065],[-10.4147602,11.3289137],[-10.4150097,11.3296645],[-10.4153396,11.330042],[-10.4157821,11.3303259],[-10.4161174,11.3305207],[-10.4164299,11.3305378],[-10.4166807,11.3304497],[-10.4169489,11.330247],[-10.4170884,11.3300998],[-10.417193,11.3298499],[-10.4172761,11.3296422],[-10.417362,11.3294817],[-10.4174612,11.3293818],[-10.4177267,11.3292635],[-10.4185743,11.3290742],[-10.4192932,11.3287217],[-10.4198028,11.3283377],[-10.4200817,11.3280117],[-10.4203607,11.3274067],[-10.4204894,11.3266019],[-10.4204331,11.3258892],[-10.420366,11.325379],[-10.4204197,11.3251055],[-10.4205538,11.3248084],[-10.4214228,11.3238983],[-10.4233272,11.3209501],[-10.4237671,11.3203873],[-10.4245074,11.3196587],[-10.4249097,11.3191065],[-10.4252074,11.3185253],[-10.4254274,11.3182385],[-10.4256151,11.3180886],[-10.4261033,11.3177598],[-10.4277019,11.3164949],[-10.4297216,11.3144328],[-10.4305155,11.3137174],[-10.4308427,11.3134886],[-10.4312504,11.3132888],[-10.4316367,11.3132624],[-10.4321356,11.3132729],[-10.4327525,11.3134729],[-10.4338093,11.3139411],[-10.4354991,11.3144565],[-10.4370011,11.3148773],[-10.4380418,11.3153035],[-10.4393829,11.3159504],[-10.4407937,11.3165237],[-10.4422153,11.3167709],[-10.4431916,11.3168447],[-10.4452221,11.3168051],[-10.4480625,11.3163897],[-10.4495002,11.3162344],[-10.4499857,11.3161267],[-10.4503236,11.315953],[-10.4507018,11.3156927],[-10.451359,11.3150036],[-10.4516486,11.3146853],[-10.452,11.3142461],[-10.4525472,11.3131362],[-10.4527725,11.3125156],[-10.4529441,11.3111899],[-10.4529924,11.3104115],[-10.4530568,11.3101247],[-10.4532338,11.3098723],[-10.4540868,11.30912],[-10.4552803,11.3083073],[-10.4558704,11.3080128],[-10.4562781,11.3078759],[-10.4566,11.3078917],[-10.4567851,11.3079918],[-10.4569835,11.3083231],[-10.4570434,11.3085819],[-10.4578471,11.3086756],[-10.4583299,11.3085967],[-10.458582,11.3083126],[-10.4586411,11.3078392],[-10.4591614,11.3071659],[-10.4601592,11.3067293],[-10.4605749,11.3068214],[-10.4607171,11.3068371],[-10.4608297,11.3065689],[-10.461106,11.3063243],[-10.4616907,11.3063716],[-10.4619938,11.3062059],[-10.4622486,11.3054484],[-10.462541,11.305117],[-10.4629111,11.3049513],[-10.4630292,11.304783],[-10.4630935,11.3046567],[-10.4633403,11.3045094],[-10.4633832,11.3041097],[-10.4633939,11.3038046],[-10.4634583,11.3036573],[-10.4638016,11.3038151],[-10.4639733,11.3037835],[-10.4640162,11.3036257],[-10.4640591,11.3033522],[-10.4642093,11.3030892],[-10.4645097,11.3029313],[-10.4648852,11.3030365],[-10.4652822,11.3030892],[-10.4656148,11.3029945],[-10.4659152,11.3025526],[-10.4661405,11.3020371],[-10.4663015,11.3018793],[-10.4664946,11.3015847],[-10.4666287,11.3016005],[-10.4667413,11.3014637],[-10.4667145,11.3012743],[-10.4665965,11.3011218],[-10.4665107,11.3010376],[-10.4665214,11.3009166],[-10.4666072,11.3008745],[-10.4667038,11.3008377],[-10.4666609,11.3006378],[-10.4668111,11.3005694],[-10.4669935,11.3003748],[-10.4669023,11.3003327],[-10.4668272,11.3002012],[-10.4668433,11.2998961],[-10.466913,11.2997856],[-10.4671866,11.3001065],[-10.4675353,11.2999697],[-10.4675567,11.299733],[-10.4674977,11.2995647],[-10.4673851,11.2992964],[-10.4673797,11.2991649],[-10.4674977,11.2990176],[-10.4673368,11.2987388],[-10.4671598,11.2985021],[-10.4671061,11.2984021],[-10.4671115,11.2983232],[-10.4671276,11.2982022],[-10.4671168,11.2980917],[-10.4671705,11.2979655],[-10.467208,11.2978813],[-10.4672617,11.2978077],[-10.4673851,11.2977656],[-10.4675299,11.2976814],[-10.4676211,11.297613],[-10.4677337,11.2974395],[-10.4677123,11.2972501],[-10.4676855,11.296966],[-10.4676962,11.2967872],[-10.4676747,11.2966346],[-10.4676479,11.2964873],[-10.4676265,11.2963032],[-10.4676426,11.2961506],[-10.4677606,11.2955509],[-10.467664,11.2953879],[-10.4674709,11.2952195],[-10.4673958,11.2949565],[-10.467428,11.2947776],[-10.467546,11.2945462],[-10.4678249,11.2944094],[-10.4680288,11.2942937],[-10.4682434,11.2941569],[-10.4684258,11.2940096],[-10.4685438,11.2938097],[-10.4686511,11.293452],[-10.4687798,11.2932731],[-10.4689729,11.292968],[-10.469048,11.292726],[-10.4691875,11.2924314],[-10.4691982,11.2920948],[-10.4692948,11.2919264],[-10.4693699,11.2917686],[-10.4693377,11.2915687],[-10.4692948,11.2914319],[-10.4694021,11.2913267],[-10.4695094,11.2912215],[-10.4696596,11.2909374],[-10.469724,11.2907481],[-10.469842,11.2905902],[-10.4699385,11.2903272],[-10.4699922,11.2900537],[-10.4700995,11.2898222],[-10.4701209,11.2896433],[-10.4701638,11.2894434],[-10.4702282,11.289212],[-10.4703677,11.2889489],[-10.4703784,11.2885702],[-10.4703999,11.2884123],[-10.4705286,11.2882861],[-10.4706037,11.2880862],[-10.4703891,11.2877916],[-10.4703462,11.287518],[-10.4706895,11.2873813],[-10.4708719,11.2869814],[-10.4704535,11.2869814],[-10.4702067,11.2869604],[-10.4701531,11.2866342],[-10.4700458,11.2863502],[-10.4699707,11.286245],[-10.4699922,11.286003],[-10.4700995,11.2858241],[-10.470078,11.2854664],[-10.4700136,11.2850771],[-10.4700244,11.284793],[-10.4702819,11.2846036],[-10.4704213,11.284288],[-10.4700029,11.2840986],[-10.4699278,11.2839618],[-10.4700244,11.2837198],[-10.4701424,11.2835304],[-10.4701102,11.2833305],[-10.4699063,11.2831517],[-10.470078,11.2827834],[-10.4701424,11.2825519],[-10.4701638,11.2822994],[-10.4699814,11.2820574],[-10.4697669,11.2818575],[-10.4695845,11.2816471],[-10.4694021,11.2814472],[-10.4691339,11.2813314],[-10.4691661,11.2810053],[-10.4688871,11.280637],[-10.468694,11.2802793],[-10.4686511,11.2800162],[-10.4686725,11.2793429],[-10.4684687,11.2789956],[-10.4682863,11.2785748],[-10.4679215,11.2782696],[-10.4676318,11.2779645],[-10.4675138,11.2776699],[-10.4672456,11.2776384],[-10.4670632,11.2771964],[-10.4669345,11.2768597],[-10.466795,11.2763126],[-10.4667413,11.2760706],[-10.4669666,11.2757971],[-10.4668915,11.2753551],[-10.4668057,11.2749869],[-10.4667628,11.2746397],[-10.4668486,11.2745029],[-10.4669774,11.2743977],[-10.4669774,11.2741346],[-10.4668486,11.2737032],[-10.4667628,11.2734928],[-10.4665911,11.2731035],[-10.4664838,11.2727142],[-10.4664517,11.2725037],[-10.4665053,11.2722828],[-10.466634,11.2720723],[-10.4667842,11.2718303],[-10.4669023,11.2717041],[-10.4670096,11.2716199],[-10.4671812,11.2712727],[-10.4673743,11.2709886],[-10.4675353,11.2707045],[-10.4675675,11.2702731],[-10.4676748,11.2699574],[-10.4677606,11.2695366],[-10.4678035,11.2692209],[-10.4679966,11.2687369],[-10.468061,11.2684212],[-10.4536844,11.2443668],[-10.4535021,11.2441353],[-10.4532982,11.2439669],[-10.4529549,11.2437565],[-10.4524828,11.2435776],[-10.452,11.2438406],[-10.4516674,11.2440406],[-10.451131,11.2441248],[-10.4505302,11.2437565],[-10.4502512,11.2435671],[-10.4499723,11.2433671],[-10.4497684,11.2430409],[-10.4496826,11.242641],[-10.4493285,11.242378],[-10.4491354,11.2419465],[-10.4486955,11.2412836],[-10.4483415,11.2409153],[-10.4479231,11.240547],[-10.4474403,11.2402628],[-10.4470326,11.2399892],[-10.4468287,11.2397156],[-10.4467858,11.2393999],[-10.4467322,11.2392211],[-10.4466141,11.2388001],[-10.4462601,11.2383687],[-10.4457773,11.2381898],[-10.4449404,11.2378846],[-10.4448224,11.2378531],[-10.4444255,11.2377583],[-10.4439856,11.2377478],[-10.4433418,11.2377163],[-10.4431487,11.2375584],[-10.4426552,11.2374006],[-10.4417647,11.2369691],[-10.4414321,11.2370112],[-10.4409922,11.2367902],[-10.4405738,11.2364219],[-10.4404236,11.2361904],[-10.4399837,11.2359799],[-10.439458,11.23558],[-10.4387177,11.2354748],[-10.4383637,11.2351591],[-10.4381169,11.234675],[-10.4379023,11.2341699],[-10.4374303,11.2338332],[-10.4368509,11.2339174],[-10.4361428,11.2338542],[-10.4353596,11.2338542],[-10.4344798,11.2336964],[-10.4340721,11.2334333],[-10.4338146,11.2332544],[-10.43301,11.2329703],[-10.4319371,11.2329703],[-10.43095,11.2327072],[-10.4303814,11.2324757],[-10.4293407,11.2324862],[-10.428536,11.2320442],[-10.4276777,11.2319285],[-10.427152,11.231939],[-10.4267658,11.2319811],[-10.4263581,11.2319916],[-10.4260791,11.23196],[-10.4259289,11.2321916],[-10.4257895,11.2325493],[-10.4252852,11.2327177],[-10.425135,11.2325704],[-10.424899,11.232623],[-10.4249848,11.2323915],[-10.4255105,11.2319706],[-10.4258324,11.2313602],[-10.4262401,11.2307288],[-10.4263259,11.2303921],[-10.4264761,11.2300764],[-10.4266692,11.2296975],[-10.4267551,11.2291714],[-10.4268194,11.2286662],[-10.4271199,11.2279927],[-10.4272915,11.2272561],[-10.4275705,11.2268772],[-10.4279567,11.2263721],[-10.4281713,11.2259091],[-10.4280211,11.225004],[-10.4283751,11.2247725],[-10.4285039,11.2244568],[-10.4288901,11.224541],[-10.4294373,11.2244358],[-10.4298772,11.2242042],[-10.4300488,11.2240359],[-10.4303707,11.223878],[-10.4307462,11.2236465],[-10.4314221,11.2230887],[-10.4315723,11.2228046],[-10.431862,11.2226152],[-10.4320551,11.2225731],[-10.432377,11.222552],[-10.4327632,11.2224573],[-10.4332675,11.2225204],[-10.4335679,11.2223836],[-10.4337932,11.2221626],[-10.4340829,11.2220048],[-10.4343725,11.2219522],[-10.4346837,11.2216575],[-10.4347802,11.2214155],[-10.4349546,11.2213603],[-10.4352764,11.221163],[-10.4354749,11.2209709],[-10.4359014,11.2207578],[-10.4366122,11.2206394],[-10.4369099,11.2204158],[-10.4372237,11.2202264],[-10.4374571,11.2199791],[-10.437787,11.2198422],[-10.4386051,11.2197053],[-10.4388384,11.2195712],[-10.4389725,11.2193581],[-10.4392032,11.2191134],[-10.4394795,11.2187424],[-10.4398791,11.2186424],[-10.4401487,11.2184793],[-10.440445,11.2184056],[-10.4404719,11.2182675],[-10.4407843,11.2182557],[-10.4411599,11.2182938],[-10.4413543,11.2182649],[-10.4419685,11.2179242],[-10.4422314,11.2180031],[-10.4427222,11.2175111],[-10.4430334,11.2172717],[-10.443197,11.2171086],[-10.4438112,11.216685],[-10.4440875,11.2163719],[-10.4443691,11.2163798],[-10.4449646,11.2161456],[-10.4452516,11.2159641],[-10.4455439,11.2158457],[-10.4456566,11.2157378],[-10.4457531,11.2154905],[-10.4459436,11.2152406],[-10.4460294,11.2150512],[-10.4463245,11.2150248],[-10.4464371,11.2149117],[-10.4466034,11.2146749],[-10.4465524,11.2145013],[-10.4469119,11.2143118],[-10.447518,11.2141145],[-10.4476816,11.2138541],[-10.4478694,11.2137067],[-10.4480411,11.2136988],[-10.4483817,11.2135752],[-10.4486458,11.2132925],[-10.4487009,11.2127753],[-10.4490603,11.2125175],[-10.4495592,11.2124596],[-10.4497898,11.212344],[-10.4501894,11.2118493],[-10.4507178,11.2116046],[-10.4508331,11.2114126],[-10.4508251,11.2110548],[-10.4509163,11.2109285],[-10.4511791,11.2108337],[-10.4514527,11.2108653],[-10.4517102,11.2110311],[-10.4520214,11.21116],[-10.4522252,11.2110969],[-10.4523647,11.2108706],[-10.4523808,11.210418],[-10.4525632,11.2100708],[-10.4531157,11.2098234],[-10.4533786,11.2094709],[-10.4533786,11.2082185],[-10.4537112,11.2075292],[-10.4541189,11.2072555],[-10.4550791,11.2058084],[-10.4557067,11.2053296],[-10.4561815,11.2044455],[-10.4567206,11.2041798],[-10.4575494,11.2035352],[-10.4578042,11.202859],[-10.4582468,11.2025196],[-10.4584104,11.2018618],[-10.4585794,11.2016908],[-10.4590219,11.2016013],[-10.4591855,11.2015145],[-10.4594323,11.2009514],[-10.4595747,11.2008405],[-10.4598963,11.2008041],[-10.4602316,11.2004778],[-10.4603577,11.200191],[-10.4603738,11.1992991],[-10.4604784,11.1990518],[-10.4607198,11.1988676],[-10.4611731,11.1984282],[-10.4612052,11.1982361],[-10.4611006,11.1979546],[-10.461098,11.1978309],[-10.4613662,11.1975047],[-10.4615834,11.1967863],[-10.4616505,11.1959707],[-10.4617953,11.1955655],[-10.4618812,11.1949419],[-10.4617605,11.1943078],[-10.4618061,11.1938789],[-10.462085,11.1935237],[-10.4622754,11.1928896],[-10.4622138,11.192287],[-10.4624203,11.191866],[-10.4624257,11.191674],[-10.4627368,11.1913766],[-10.4627395,11.1912714],[-10.4626456,11.1911004],[-10.4623988,11.1910398],[-10.4621896,11.1909451],[-10.4620636,11.1906873],[-10.462077,11.1902242],[-10.4626322,11.1893269],[-10.4630935,11.1890322],[-10.4631901,11.1889243],[-10.4633752,11.1884744],[-10.4633752,11.1882455],[-10.463182,11.1879745],[-10.4630774,11.1874666],[-10.4631472,11.1872114],[-10.4636836,11.1866352],[-10.4642147,11.1853116],[-10.4645205,11.1851538],[-10.4650301,11.1844591],[-10.4655263,11.1835645],[-10.4656282,11.1829225],[-10.4659823,11.1824304],[-10.4665267,11.182112],[-10.4666233,11.1819226],[-10.4666179,11.1815779],[-10.4671007,11.1804069],[-10.4677069,11.1802122],[-10.4679161,11.1799017],[-10.4681093,11.1787703],[-10.4680073,11.1784019],[-10.4680663,11.178023],[-10.4692358,11.1771704],[-10.4693484,11.1768704],[-10.4692733,11.1765494],[-10.4693699,11.1763652],[-10.46974,11.1761231],[-10.4698044,11.1758442],[-10.4695523,11.175339],[-10.469563,11.1747496],[-10.4694772,11.1736497],[-10.469209,11.1735497],[-10.4680181,11.1734444],[-10.4674763,11.1735076],[-10.4672241,11.173476],[-10.4665375,11.173076],[-10.4659796,11.1724498],[-10.464558,11.1715261],[-10.4641718,11.1707288],[-10.4637909,11.1704973],[-10.4635227,11.1705078],[-10.4597141,11.1694973],[-10.4590274,11.168971],[-10.4583622,11.1683184],[-10.4578902,11.1678553],[-10.4573752,11.1667606],[-10.4568173,11.166508],[-10.4562165,11.1656028],[-10.4554011,11.1649923],[-10.4545857,11.1641713],[-10.4537274,11.1636871],[-10.4534699,11.1636449],[-10.4529656,11.1630766],[-10.4526652,11.1626976],[-10.4518927,11.1622134],[-10.4511417,11.1619819],[-10.4504765,11.161424],[-10.4497577,11.1612451],[-10.4496008,11.161178],[-10.4489208,11.1608872],[-10.4480196,11.1604767],[-10.4476334,11.160803],[-10.4467965,11.1604872],[-10.4460455,11.1601504],[-10.4461957,11.1594977],[-10.4457773,11.159203],[-10.445434,11.1592135],[-10.4452623,11.1594346],[-10.4441572,11.1595188],[-10.4432346,11.1587188],[-10.4414107,11.1590346],[-10.4408957,11.1590557],[-10.4396726,11.1578346],[-10.4398443,11.1568452],[-10.4390074,11.1560873],[-10.4378701,11.1556452],[-10.4366471,11.1548242],[-10.4359819,11.1538137],[-10.4357244,11.1529084],[-10.4353596,11.1526558],[-10.4348661,11.1520874],[-10.4342867,11.1513926],[-10.4341901,11.1509611],[-10.4339112,11.1505189],[-10.4337717,11.1502453],[-10.4336537,11.1499505],[-10.4334069,11.14954],[-10.4332675,11.1489505],[-10.4328276,11.1486768],[-10.4326345,11.1478242],[-10.4322697,11.1470452],[-10.4319264,11.1465505],[-10.43198,11.1460873],[-10.4314114,11.1452873],[-10.4310466,11.1448557],[-10.4305853,11.1440873],[-10.4301239,11.1439189],[-10.4294802,11.143182],[-10.4282356,11.143182],[-10.4279567,11.1430978],[-10.4276456,11.1427083],[-10.4271842,11.1427925],[-10.4269589,11.1424031],[-10.4266049,11.1425715],[-10.4258431,11.1421399],[-10.4253389,11.1420557],[-10.4248495,11.1419786],[-10.4244698,11.1419188],[-10.4240085,11.1419504],[-10.4230965,11.1416241],[-10.4224635,11.1415925],[-10.4217769,11.1411925],[-10.4209186,11.1405714],[-10.4208542,11.1396661],[-10.4202105,11.1385503],[-10.419971,11.1382779],[-10.4197596,11.1380374],[-10.4194702,11.1377082],[-10.4191698,11.1374345],[-10.4186548,11.1365292],[-10.4182471,11.1362976],[-10.4180325,11.1359291],[-10.4173352,11.1352659],[-10.4164767,11.1338449],[-10.4161871,11.1331501],[-10.4156077,11.1326659],[-10.4152644,11.1321395],[-10.4148674,11.1318132],[-10.4141164,11.1314974],[-10.4134889,11.1313816],[-10.4132957,11.1314237],[-10.4131777,11.131529],[-10.41299,11.13145],[-10.4127486,11.1312763],[-10.4123248,11.1306605],[-10.4122497,11.1303131],[-10.4121102,11.1299447],[-10.4121263,11.1297762],[-10.4119439,11.1291657],[-10.4119171,11.1286972],[-10.4118152,11.1283393],[-10.4117508,11.127755],[-10.4116328,11.1274761],[-10.4116167,11.1272392],[-10.4117454,11.126697],[-10.4119654,11.1263444],[-10.4120458,11.1262865],[-10.4120297,11.1261707],[-10.4120941,11.1260444],[-10.4121048,11.1257128],[-10.4120619,11.1255706],[-10.4120887,11.1253811],[-10.4119332,11.1249811],[-10.4118688,11.1247179],[-10.4116435,11.1241547],[-10.4116542,11.1239705],[-10.4116006,11.1238494],[-10.4114933,11.1230494],[-10.4114504,11.1229283],[-10.4114075,11.1225177],[-10.4114021,11.1218545],[-10.411504,11.1215703],[-10.4114557,11.1212492],[-10.4115094,11.1209913],[-10.411445,11.1207597],[-10.4112841,11.1204017],[-10.411048,11.1194859],[-10.4109944,11.1182647],[-10.4111982,11.1173382],[-10.4112948,11.1170856],[-10.4113806,11.1165276],[-10.4117454,11.115338],[-10.4120566,11.1145379],[-10.4123677,11.1140852],[-10.4126037,11.1138326],[-10.4127968,11.1135483],[-10.4131187,11.1134852],[-10.4135264,11.113243],[-10.413977,11.1127903],[-10.4142238,11.1126535],[-10.4148246,11.1120113],[-10.4151679,11.1120113],[-10.4696483,11.1156947],[-10.4701339,11.1156137],[-10.4704756,11.1154479],[-10.4713164,11.1149167],[-10.4719691,11.1142349],[-10.4726857,11.1134262],[-10.473006,11.1129014],[-10.4732992,11.1126084],[-10.474263,11.1121928],[-10.474643,11.1119957],[-10.4748891,11.1118223],[-10.4750964,11.1115266],[-10.4753421,11.1113627],[-10.4758316,11.1111951],[-10.4764747,11.1109257],[-10.4770103,11.1108296],[-10.4784143,11.1110506],[-10.4794389,11.111677],[-10.4798976,11.111877],[-10.4806566,11.1125798],[-10.4821239,11.1136403],[-10.4824511,11.1137877],[-10.482663,11.113943],[-10.482832,11.1141167],[-10.4831485,11.1143115],[-10.4833389,11.1143799],[-10.4838512,11.1143352],[-10.484039,11.1143667],[-10.4841946,11.1144483],[-10.484393,11.114372],[-10.4846639,11.1143509],[-10.4851628,11.1146799],[-10.4852165,11.1148431],[-10.4856537,11.1154458],[-10.4856698,11.1156379],[-10.4858602,11.1160117],[-10.4870618,11.1165381],[-10.487373,11.1166065],[-10.4878987,11.1164328],[-10.4884298,11.1164117],[-10.4888053,11.1166749],[-10.4891969,11.1164907],[-10.4896877,11.1163486],[-10.4899962,11.1164828],[-10.4903154,11.1164696],[-10.4905501,11.1163709],[-10.4907687,11.1165696],[-10.490892,11.1167302],[-10.4911442,11.1167512],[-10.4912179,11.1168618],[-10.4913829,11.1168776],[-10.4915203,11.1169684],[-10.4915539,11.1170401],[-10.4916987,11.1171039],[-10.4919971,11.1171171],[-10.4922278,11.1172197],[-10.4924799,11.1174513],[-10.4926542,11.1176948],[-10.4927669,11.1177816],[-10.4929506,11.1178737],[-10.493074,11.1179014],[-10.4932564,11.1180395],[-10.4933396,11.1180566],[-10.4934602,11.118004],[-10.4935729,11.1182619],[-10.4937231,11.1183922],[-10.4939149,11.1186863],[-10.4940014,11.1187218],[-10.4941053,11.1188238],[-10.4943172,11.1189304],[-10.4948456,11.1189791],[-10.4951581,11.1190949],[-10.4955349,11.1193041],[-10.4960446,11.1197147],[-10.496243,11.1199792],[-10.4963611,11.1200121],[-10.4965998,11.1200226],[-10.4968023,11.1201858],[-10.4970383,11.1204635],[-10.4974903,11.1205648],[-10.4975546,11.1206582],[-10.4975412,11.1207714],[-10.4976123,11.1207872],[-10.4978363,11.1209675],[-10.4979141,11.1209517],[-10.4979489,11.1209859],[-10.4982386,11.1210833],[-10.4984036,11.1213386],[-10.4988649,11.1213978],[-10.4989574,11.1214873],[-10.4992203,11.1215202],[-10.4996307,11.121711],[-10.4998587,11.1217754],[-10.4999673,11.1218834],[-10.5000531,11.1218886],[-10.5002248,11.1218241],[-10.5002731,11.1219149],[-10.5005225,11.1221347],[-10.5006808,11.1221465],[-10.5008229,11.1222071],[-10.5009409,11.1224045],[-10.501134,11.1224584],[-10.5012078,11.1225584],[-10.5013419,11.1226018],[-10.5014707,11.1226979],[-10.5015847,11.1227716],[-10.5018301,11.1231216],[-10.5023396,11.1231598],[-10.5026186,11.1233493],[-10.5029619,11.1235177],[-10.5041421,11.1234651],[-10.504657,11.1235283],[-10.505569,11.1239809],[-10.5061483,11.1241704],[-10.5069852,11.1245178],[-10.5079186,11.1251073],[-10.5087876,11.1257811],[-10.5099571,11.126918],[-10.5105794,11.1273075],[-10.5116415,11.1279181],[-10.5123818,11.1281497],[-10.5130792,11.1284866],[-10.5145168,11.129255],[-10.5152249,11.1294972],[-10.5160296,11.1299182],[-10.5164695,11.1303077],[-10.5169952,11.1305078],[-10.5177033,11.1306867],[-10.5186474,11.1306867],[-10.5190659,11.1308236],[-10.5193877,11.1311815],[-10.5206537,11.1313183],[-10.5445147,11.1450031],[-10.5461454,11.1448136],[-10.5477977,11.14494],[-10.5491924,11.1451926],[-10.5520034,11.1462768],[-10.553323,11.1476137],[-10.5542886,11.1490137],[-10.5558121,11.1503716],[-10.5563271,11.1513716],[-10.5580866,11.1539294],[-10.5593956,11.1557821],[-10.5605221,11.1582241],[-10.562464,11.1602451],[-10.5645883,11.1621608],[-10.5664122,11.1635713],[-10.5693197,11.1656448],[-10.5715084,11.1669342],[-10.5724686,11.1676053],[-10.57293,11.1682368],[-10.5731419,11.1686157],[-10.5736488,11.1701551],[-10.5740082,11.1712077],[-10.5745769,11.1721707],[-10.5760615,11.1741324],[-10.5763806,11.1744166],[-10.576673,11.1747126],[-10.576964,11.1749981],[-10.5772403,11.1753363],[-10.577479,11.1756428],[-10.5776238,11.1757915],[-10.5778022,11.1759915],[-10.5780114,11.1761586],[-10.5782314,11.1763362],[-10.5785331,11.1767717],[-10.5788188,11.1773045],[-10.5788458,11.1773409],[-10.5788725,11.1773768],[-10.5793566,11.1780282],[-10.5796194,11.1783808],[-10.5797052,11.1787703],[-10.5801237,11.1794018],[-10.5805475,11.1798965],[-10.5806869,11.1801438],[-10.5807138,11.1807858],[-10.5807996,11.1812437],[-10.580923,11.1814647],[-10.5809552,11.18167],[-10.5808961,11.1818699],[-10.5809766,11.1819857],[-10.5810088,11.182212],[-10.5808854,11.1824015],[-10.5809337,11.1826067],[-10.5810785,11.1828488],[-10.581336,11.1831224],[-10.581454,11.183354],[-10.5815989,11.1834908],[-10.5818296,11.1834908],[-10.5824304,11.1838171],[-10.5827576,11.1841592],[-10.5831063,11.1842013],[-10.5834603,11.1841697],[-10.5835944,11.1842749],[-10.5842543,11.1844748],[-10.5852467,11.1849854],[-10.5865073,11.184917],[-10.5871403,11.1849275],[-10.5873978,11.1847907],[-10.5876607,11.1845537],[-10.5880362,11.1845169],[-10.5883527,11.1846222],[-10.5884332,11.1847064],[-10.5888516,11.1858485],[-10.5892351,11.1860129],[-10.5893719,11.1865036],[-10.5899985,11.1867739],[-10.5898869,11.1870062],[-10.5895141,11.1870641],[-10.5894068,11.1872693],[-10.5894229,11.1874035],[-10.5896696,11.1876429],[-10.5897126,11.1879087],[-10.589852,11.1880929],[-10.5898011,11.1882429],[-10.5895489,11.1884139],[-10.5895034,11.1885323],[-10.5895463,11.1887138],[-10.5896992,11.1888296],[-10.5900237,11.1889059],[-10.590139,11.1890927],[-10.5901766,11.1896664],[-10.5901068,11.1898505],[-10.5897635,11.1899532],[-10.5896348,11.19009],[-10.5896267,11.1903189],[-10.5900237,11.1911898],[-10.5897528,11.1916424],[-10.5897823,11.1921265],[-10.5895194,11.1926765],[-10.5894576,11.1929756],[-10.5894926,11.1932316],[-10.5896535,11.1934191],[-10.5899624,11.1935373],[-10.5905425,11.1933599],[-10.5908015,11.1934158],[-10.5910403,11.194442],[-10.5913864,11.1950156],[-10.591346,11.1952076],[-10.5912583,11.1953408],[-10.590544,11.1958102],[-10.5898199,11.1961996],[-10.5893424,11.1966811],[-10.5889079,11.1969837],[-10.5891305,11.197702],[-10.5894149,11.1987307],[-10.5895491,11.1993675],[-10.5897583,11.2000673],[-10.5906595,11.2012987],[-10.5921319,11.2031826],[-10.592773,11.2038457],[-10.5932907,11.2042114],[-10.5936689,11.204406],[-10.5944977,11.2053005],[-10.594723,11.2056611],[-10.5949992,11.206011],[-10.5956591,11.2063293],[-10.5963805,11.2064188],[-10.5969707,11.2063188],[-10.5978371,11.2059241],[-10.598513,11.2057979],[-10.599103,11.2057742],[-10.5995295,11.2058584],[-10.5998702,11.2059795],[-10.6003476,11.2062767],[-10.6015922,11.2069819],[-10.6021983,11.2071397],[-10.6027079,11.2071555],[-10.6033731,11.2069766],[-10.6040759,11.2066714],[-10.6048967,11.2064135],[-10.605991,11.206203],[-10.6086463,11.2060242],[-10.6099499,11.205982],[-10.610717,11.2060558],[-10.6114411,11.2060873],[-10.6123048,11.2058979],[-10.6139842,11.2049486],[-10.6145419,11.2046034],[-10.614869,11.2041982],[-10.6151661,11.203504],[-10.6152019,11.2018329],[-10.6153251,11.2009514],[-10.6155236,11.2002409],[-10.6161619,11.1991516],[-10.6163336,11.1986203],[-10.6164998,11.1979204],[-10.6166045,11.1965915],[-10.6166662,11.1947787],[-10.6169666,11.192258],[-10.6171596,11.1914003],[-10.6176264,11.1904162],[-10.6183399,11.189269],[-10.6190641,11.188248],[-10.620625,11.1869062],[-10.6212684,11.1863047],[-10.6219071,11.1859405],[-10.6224651,11.185709],[-10.6230444,11.1856432],[-10.6234039,11.1856379],[-10.6238329,11.1857274],[-10.6252627,11.1861588],[-10.6262792,11.1863851],[-10.6276632,11.1869429],[-10.6293584,11.1876428],[-10.6308603,11.1881481],[-10.6314183,11.1885691],[-10.6317134,11.1890269],[-10.6320191,11.19019],[-10.6321854,11.1904872],[-10.633607,11.1915107],[-10.6352534,11.1930769],[-10.6368579,11.1942156],[-10.637751,11.1951812],[-10.6379951,11.195505],[-10.6382097,11.1956392],[-10.6385368,11.1957207],[-10.63976,11.1954628],[-10.6404413,11.195326],[-10.640985,11.1950994],[-10.6415187,11.1947803],[-10.6427203,11.1933991],[-10.6433379,11.1929162],[-10.6443712,11.1923241],[-10.6453029,11.191879],[-10.6464655,11.1909687],[-10.6473695,11.1899059],[-10.647525,11.1896769],[-10.647584,11.189498],[-10.6475921,11.1892321],[-10.6468849,11.1876165],[-10.6466243,11.1867612],[-10.6465594,11.1863115],[-10.6465003,11.1857774],[-10.646318,11.1850617],[-10.6460525,11.1845958],[-10.6451243,11.1836908],[-10.6445075,11.1829697],[-10.6439548,11.1823789],[-10.643263,11.1818225],[-10.6424298,11.1810556],[-10.6419967,11.1809393],[-10.6411714,11.1808385],[-10.6400466,11.1809179],[-10.6380043,11.1812297],[-10.6373084,11.1814016],[-10.6366165,11.1814146],[-10.6357823,11.1811962],[-10.6352779,11.1807885],[-10.6351572,11.1804911],[-10.6351815,11.180149],[-10.6353504,11.179399],[-10.635404,11.1780177],[-10.6353934,11.1771703],[-10.6353022,11.1764809],[-10.6350607,11.1757127],[-10.6348006,11.1750468],[-10.6347309,11.174618],[-10.6347148,11.1743074],[-10.6347604,11.173918],[-10.6347549,11.1735734],[-10.6347201,11.1732496],[-10.6347496,11.1729207],[-10.6349775,11.1726471],[-10.6351895,11.1724761],[-10.6354068,11.1723812],[-10.6356401,11.172334],[-10.6358761,11.1723919],[-10.6368149,11.1731391],[-10.6377081,11.1736917],[-10.6383277,11.1741601],[-10.639119,11.1751021],[-10.6396929,11.1757283],[-10.6399558,11.1758626],[-10.6401999,11.1759231],[-10.640966,11.1760083],[-10.6415807,11.1762466],[-10.6419165,11.17646],[-10.6423054,11.176773],[-10.6427748,11.1773966],[-10.6433595,11.1781123],[-10.6441265,11.1788887],[-10.6445629,11.1793231],[-10.6448589,11.1795832],[-10.6450171,11.1796254],[-10.6451727,11.1796307],[-10.6454812,11.1795622],[-10.6458352,11.1794465],[-10.6459747,11.179407],[-10.6461651,11.179386],[-10.6465057,11.1794281],[-10.6469456,11.1794728],[-10.6473051,11.1794675],[-10.6479193,11.1793439],[-10.6484772,11.1791701],[-10.6491263,11.1788333],[-10.6503655,11.1780913],[-10.6508643,11.1779125],[-10.651433,11.1778492],[-10.6525112,11.1778176],[-10.6534312,11.1777019],[-10.6543229,11.1774717],[-10.6565136,11.1765209],[-10.6569637,11.1762416],[-10.6574916,11.1759796],[-10.6581836,11.1758512],[-10.6593705,11.1759423],[-10.660582,11.1761362],[-10.6610004,11.1762468],[-10.6613384,11.1764072],[-10.6624276,11.1774707],[-10.6629745,11.1778124],[-10.6632132,11.1778546],[-10.66345,11.1778423],[-10.6648211,11.1773369],[-10.6657307,11.1769003],[-10.666043,11.1768547],[-10.6662763,11.1768861],[-10.6667296,11.177123],[-10.6671668,11.1773835],[-10.6679647,11.1777043],[-10.6684652,11.1779591],[-10.6686152,11.17809],[-10.6687037,11.1782598],[-10.6687332,11.1784439],[-10.6687413,11.1788755],[-10.6688056,11.1791438],[-10.6689237,11.1793255],[-10.6692236,11.1795794],[-10.6695915,11.1797202],[-10.6698732,11.1797465],[-10.6702834,11.1796754],[-10.67225,11.1786192],[-10.6725151,11.1785571],[-10.6727512,11.1785807],[-10.6729845,11.1787176],[-10.6731911,11.1789991],[-10.6733767,11.1794121],[-10.6738971,11.1799685],[-10.6742452,11.1803412],[-10.6747548,11.1806936],[-10.6752885,11.1808858],[-10.6756667,11.1809962],[-10.6759454,11.1810148],[-10.6762836,11.1808358],[-10.6764525,11.1805964],[-10.676576,11.1801991],[-10.6766699,11.1796648],[-10.676568,11.1787124],[-10.6765465,11.1784308],[-10.6765948,11.1780939],[-10.6769422,11.1773025],[-10.6769783,11.1769178],[-10.6769514,11.1766573],[-10.6767074,11.1761441],[-10.6761168,11.1754886],[-10.675597,11.1753178],[-10.6753073,11.1753311],[-10.6750901,11.1754152],[-10.6744262,11.1756595],[-10.6739554,11.1756441],[-10.6734808,11.1753479],[-10.6732209,11.1750124],[-10.6725458,11.1746742],[-10.6719667,11.1745033],[-10.6707735,11.1743827],[-10.6698077,11.1740563],[-10.6688607,11.1734343],[-10.668646,11.173121],[-10.6685248,11.1722599],[-10.6683138,11.1714652],[-10.6668411,11.1685599],[-10.6666088,11.1682074],[-10.6665492,11.1678759],[-10.6665834,11.16764],[-10.6668567,11.1673816],[-10.6677845,11.1670823],[-10.6687871,11.1671138],[-10.6695373,11.1673006],[-10.6716123,11.1673211],[-10.6720606,11.1672897],[-10.6727199,11.1670982],[-10.6749901,11.1660851],[-10.675275,11.1657891],[-10.6752653,11.1654208],[-10.6750343,11.1650925],[-10.6747004,11.164921],[-10.6723182,11.1648427],[-10.6715522,11.1646277],[-10.6707882,11.1642471],[-10.6694958,11.1633965],[-10.6687102,11.1627791],[-10.66834,11.1623447],[-10.6680791,11.1617552],[-10.6677943,11.1601319],[-10.6678561,11.1598715],[-10.6679687,11.1596819],[-10.6683469,11.1592846],[-10.6689906,11.158753],[-10.6694655,11.1583873],[-10.6697926,11.1580768],[-10.6699026,11.1578215],[-10.6699455,11.1574188],[-10.6699374,11.1568952],[-10.6700072,11.1561136],[-10.6699178,11.1550381],[-10.6700126,11.1545506],[-10.6701762,11.1543084],[-10.6704712,11.154269],[-10.6708414,11.1543453],[-10.6712732,11.1545715],[-10.6724335,11.1556949],[-10.6726483,11.1557789],[-10.6729233,11.1557203],[-10.6738079,11.1551742],[-10.6742666,11.1550058],[-10.6746207,11.1549637],[-10.674921,11.15499],[-10.6757122,11.1554348],[-10.6761951,11.1558716],[-10.6764311,11.1562557],[-10.6767261,11.1572346],[-10.6770694,11.157782],[-10.6776211,11.1581882],[-10.6779519,11.1583688],[-10.678306,11.158415],[-10.6786238,11.1583754],[-10.6790597,11.1582742],[-10.6794915,11.1582136],[-10.6800682,11.1583137],[-10.6804839,11.1584241],[-10.6819081,11.15909],[-10.6827559,11.1592242],[-10.6840673,11.1591741],[-10.6853252,11.1590487],[-10.6876881,11.1584831],[-10.6896143,11.158301],[-10.6903756,11.1581727],[-10.6909419,11.1578558],[-10.6913763,11.1575031],[-10.69235,11.1565768],[-10.693211,11.1560399],[-10.6937769,11.1557031],[-10.6942635,11.1553069],[-10.6944717,11.1549927],[-10.6945601,11.1547452],[-10.6945139,11.1544726],[-10.6941283,11.1538769],[-10.6934745,11.1533851],[-10.6927553,11.1530412],[-10.692002,11.1528907],[-10.6913598,11.1528331],[-10.6911967,11.1527453],[-10.6910437,11.1525768],[-10.6909929,11.1523427],[-10.6910598,11.1521663],[-10.6915388,11.1515339],[-10.6919213,11.1512389],[-10.6922026,11.1511888],[-10.6924158,11.1512125],[-10.6926101,11.1513045],[-10.6929749,11.1516031],[-10.6932807,11.1518663],[-10.6936751,11.1520427],[-10.6939058,11.1520848],[-10.6942222,11.1520795],[-10.6946594,11.1519638],[-10.6955391,11.1517768],[-10.6962902,11.1516427],[-10.6967711,11.1516018],[-10.6972154,11.1514018],[-10.6982321,11.1505295],[-10.6994391,11.1497347],[-10.7000881,11.1493558],[-10.7008776,11.1482555],[-10.7016037,11.1467795],[-10.7016197,11.1465559],[-10.7015446,11.1462452],[-10.7013139,11.1455452],[-10.7012362,11.1450164],[-10.7012522,11.1445268],[-10.7013703,11.1438742],[-10.7013729,11.1432241],[-10.7011236,11.1422321],[-10.701102,11.1419584],[-10.7011638,11.1417926],[-10.701247,11.1416584],[-10.701499,11.1414925],[-10.7023761,11.1410609],[-10.7032746,11.1404267],[-10.7038219,11.1397912],[-10.7039264,11.1395503],[-10.7039961,11.1392214],[-10.7040043,11.1386267],[-10.7040552,11.1382925],[-10.7041892,11.1379897],[-10.7051365,11.1365298],[-10.7053802,11.1357003],[-10.7053453,11.1354054],[-10.705238,11.1351922],[-10.7047203,11.1348186],[-10.7049523,11.1342896],[-10.7055302,11.1341754],[-10.7071225,11.1343076],[-10.7076698,11.134008],[-10.7089019,11.1339944],[-10.7098271,11.1341203],[-10.7107571,11.1338055],[-10.7119567,11.1342132],[-10.7125759,11.134237],[-10.7131661,11.1340997],[-10.7136522,11.1342837],[-10.7139243,11.1346791],[-10.7138921,11.1350223],[-10.7133048,11.1358732],[-10.7131813,11.1362977],[-10.7129269,11.1369234],[-10.7130203,11.1376345],[-10.7132751,11.1387126],[-10.7143802,11.1389663],[-10.7149287,11.1392988],[-10.7152358,11.1396031],[-10.7155121,11.1405348],[-10.715426,11.1413888],[-10.7162573,11.1424997],[-10.7176392,11.1435016],[-10.7187348,11.1453015],[-10.7193207,11.1458412],[-10.7202277,11.1463786],[-10.7206339,11.14723],[-10.721803,11.1482386],[-10.7235179,11.1491762],[-10.7250206,11.1501402],[-10.7266445,11.1496036],[-10.7276978,11.1496248],[-10.7293206,11.1493137],[-10.7296457,11.1488195],[-10.7298454,11.1481501],[-10.7295212,11.1472137],[-10.7280193,11.1446157],[-10.7273861,11.1439547],[-10.7271987,11.1435429],[-10.727407,11.1426272],[-10.7278782,11.1421646],[-10.7285524,11.1418633],[-10.7288345,11.1412512],[-10.7292375,11.1393123],[-10.7294708,11.1373524],[-10.7296952,11.1371392],[-10.7301794,11.1371368],[-10.7307355,11.1373347],[-10.7310598,11.1372389],[-10.7311703,11.136933],[-10.7308124,11.1361202],[-10.7301297,11.1359042],[-10.7297756,11.1356315],[-10.7297862,11.1350598],[-10.7302046,11.134578],[-10.7306231,11.1345086],[-10.7316917,11.1348853],[-10.7333949,11.1347039],[-10.7347311,11.1349777],[-10.7357893,11.1347937],[-10.7365261,11.1349529],[-10.7371457,11.1355349],[-10.7385575,11.135662],[-10.7394131,11.1355241],[-10.739496,11.1352418],[-10.7393907,11.1339599],[-10.7396913,11.1316022],[-10.7396467,11.1310407],[-10.7398379,11.1305405],[-10.741145,11.1289033],[-10.7420366,11.1282139],[-10.7428631,11.1268604],[-10.744038,11.1255987],[-10.745435,11.1249526],[-10.7486531,11.1240601],[-10.7502859,11.1240064],[-10.7514601,11.123588],[-10.7520641,11.1234719],[-10.753895,11.1228204],[-10.754277,11.1224715],[-10.7547362,11.1218856],[-10.7555388,11.1219178],[-10.756639,11.1215918],[-10.7574108,11.1211285],[-10.7580633,11.1215736],[-10.7587599,11.1223461],[-10.7594091,11.122711],[-10.7600519,11.123967],[-10.7609157,11.1254811],[-10.7611544,11.1262287],[-10.7614041,11.1265171],[-10.7618664,11.1265829],[-10.7624161,11.1265451],[-10.7642946,11.1252182],[-10.765572,11.1247396],[-10.7674386,11.1234221],[-10.7689542,11.1220806],[-10.7696943,11.1216424],[-10.7707172,11.1213433],[-10.7714307,11.1209515],[-10.7721691,11.1201489],[-10.7726542,11.120032],[-10.7731635,11.1201805],[-10.7734619,11.1207678],[-10.7735714,11.1226873],[-10.7738972,11.1234836],[-10.7747913,11.1249241],[-10.7750526,11.1252414],[-10.7756875,11.125779],[-10.7764506,11.1258633],[-10.7779775,11.1253698],[-10.7798422,11.1251373],[-10.7803156,11.1252912],[-10.7803226,11.1257026],[-10.7786048,11.1283015],[-10.7788272,11.1288783],[-10.7799609,11.1297627],[-10.78061,11.1295605],[-10.780963,11.1287762],[-10.7813222,11.1276542],[-10.7817124,11.1274946],[-10.7822573,11.1275712],[-10.7845675,11.1285923],[-10.7868435,11.1291514],[-10.7871253,11.1290361],[-10.7873514,11.1285509],[-10.7874861,11.1266328],[-10.7877268,11.1260869],[-10.7881878,11.1255527],[-10.7889894,11.1238822],[-10.7899465,11.1231971],[-10.7922288,11.1220988],[-10.7925961,11.1215083],[-10.7926001,11.1195662],[-10.7929448,11.1186085],[-10.7927684,11.1176261],[-10.7920733,11.116825],[-10.7919976,11.1163216],[-10.7922388,11.1159281],[-10.7929105,11.1158407],[-10.7940778,11.1163488],[-10.7944556,11.1177709],[-10.7951263,11.1198049],[-10.7961304,11.1206578],[-10.7976172,11.1215704],[-10.7985342,11.1224344],[-10.8012251,11.1239458],[-10.8022315,11.1238591],[-10.802564,11.1236308],[-10.8029673,11.1227967],[-10.8042354,11.1214069],[-10.804878,11.1204931],[-10.8058828,11.1186646],[-10.8064009,11.1180844],[-10.806829,11.1178038],[-10.8074729,11.1177914],[-10.8085677,11.1180791],[-10.8093872,11.1183383],[-10.8099881,11.118716],[-10.8102442,11.1205169],[-10.8107224,11.1217633],[-10.8113035,11.1223837],[-10.8119322,11.122618],[-10.8134882,11.1230988],[-10.8138306,11.1230146],[-10.8146754,11.1211341],[-10.8150919,11.1205571],[-10.8161755,11.1195187],[-10.8186329,11.1179928],[-10.8186974,11.117811],[-10.818586,11.1175637],[-10.8175327,11.1169657],[-10.8150288,11.1162705],[-10.8121579,11.1152008],[-10.8117326,11.1148235],[-10.8112205,11.1139381],[-10.8113121,11.1129722],[-10.8108544,11.1115476],[-10.8101184,11.1105082],[-10.8092722,11.1099269],[-10.8092954,11.1095258],[-10.8094126,11.1090837],[-10.8101377,11.1088673],[-10.8116789,11.108636],[-10.8136113,11.1079543],[-10.8153785,11.1070945],[-10.8161461,11.1066422],[-10.8168325,11.1061367],[-10.8176833,11.1053216],[-10.818507,11.1043739],[-10.8190269,11.1036681],[-10.8197359,11.1030684],[-10.8199653,11.1024519],[-10.8199453,11.1022712],[-10.8196551,11.1018519],[-10.8185614,11.1013844],[-10.817785,11.1008922],[-10.8173463,11.1001615],[-10.8169075,11.0994573],[-10.8167735,11.0990026],[-10.8168506,11.098335],[-10.8165997,11.0967563],[-10.816412,11.0962432],[-10.8163614,11.0957679],[-10.8163775,11.0951781],[-10.8165204,11.0949871],[-10.8189054,11.0941647],[-10.8196113,11.0934896],[-10.8199108,11.0925114],[-10.8200751,11.0921495],[-10.8236148,11.090986],[-10.8240761,11.0913793],[-10.8251878,11.0927449],[-10.8267853,11.0937993],[-10.8277126,11.094087],[-10.8281745,11.0940303],[-10.8288631,11.0937921],[-10.8302032,11.0941569],[-10.8313803,11.0947954],[-10.8331111,11.0951291],[-10.8346797,11.0951447],[-10.8356693,11.0952205],[-10.8363347,11.0947132],[-10.8372602,11.0935661],[-10.8375995,11.0925663],[-10.8386659,11.0912584],[-10.8385401,11.0897131],[-10.8393201,11.0885335],[-10.8392007,11.0877027],[-10.8389284,11.0869017],[-10.8380756,11.0862807],[-10.8376644,11.0858502],[-10.8377033,11.085545],[-10.8379254,11.0852697],[-10.8385761,11.0852482],[-10.8393184,11.0855266],[-10.8402441,11.085505],[-10.8408641,11.0849137],[-10.841432,11.083956],[-10.8424188,11.083732],[-10.843161,11.0838378],[-10.8437128,11.0837702],[-10.8443255,11.0837925],[-10.8452133,11.0835749],[-10.84604,11.0831774],[-10.8472197,11.0823223],[-10.8484051,11.0813621],[-10.8485377,11.0809579],[-10.8482485,11.080042],[-10.8472374,11.0777253],[-10.8468423,11.0762129],[-10.8469321,11.0756931],[-10.847238,11.0754147],[-10.8477863,11.0752931],[-10.8483346,11.0754505],[-10.8492983,11.0761536],[-10.8500717,11.0768375],[-10.8509519,11.0774168],[-10.8518852,11.0777589],[-10.8531415,11.078533],[-10.8536251,11.0786707],[-10.8549236,11.078414],[-10.855298,11.078167],[-10.8552596,11.0776382],[-10.8538593,11.0761708],[-10.8537541,11.0754966],[-10.8541184,11.0747227],[-10.8542231,11.0733558],[-10.8538122,11.072811],[-10.8531017,11.0726259],[-10.8526265,11.0726014],[-10.8525015,11.072362],[-10.8527364,11.0720645],[-10.8533046,11.0717486],[-10.85543,11.0714516],[-10.8577796,11.0714027],[-10.8598522,11.0720582],[-10.8609675,11.0719645],[-10.8629665,11.0733299],[-10.8632372,11.0731048],[-10.8631411,11.0726997],[-10.862674,11.0718294],[-10.8615257,11.0702089],[-10.8611261,11.0686334],[-10.8609709,11.0671177],[-10.8619542,11.0645238],[-10.8625985,11.0633917],[-10.862936,11.0627957],[-10.8633956,11.0623795],[-10.8638661,11.0624139],[-10.8642753,11.0628381],[-10.8653382,11.0630267],[-10.8659887,11.0634102],[-10.8664709,11.0639736],[-10.8665492,11.0644367],[-10.8662912,11.0648997],[-10.8655766,11.065466],[-10.865351,11.0662271],[-10.8653697,11.0669282],[-10.8662659,11.0679362],[-10.8670195,11.0681402],[-10.8676202,11.0679993],[-10.8686294,11.0680022],[-10.8695926,11.0676902],[-10.870205,11.0668261],[-10.8713993,11.0647381],[-10.8722818,11.0628307],[-10.8728585,11.0608632],[-10.8728455,11.0604601],[-10.8725312,11.0600939],[-10.8720721,11.0596943],[-10.8718278,11.0591457],[-10.8716402,11.0585232],[-10.8712456,11.0579012],[-10.8706629,11.0573532],[-10.86992,11.0571214],[-10.8697989,11.0565199],[-10.870256,11.0560379],[-10.8709273,11.0556826],[-10.8719404,11.0557325],[-10.8727275,11.0560042],[-10.8729895,11.0565938],[-10.8733271,11.0572204],[-10.8753905,11.0589679],[-10.877199,11.0600248],[-10.8782162,11.0606641],[-10.8792335,11.0607858],[-10.8796855,11.060484],[-10.8799491,11.0598864],[-10.8805894,11.0586542],[-10.8812484,11.056504],[-10.8818009,11.0552165],[-10.8817153,11.0545211],[-10.883976,11.0536518],[-10.8842786,11.0536384],[-10.8853515,11.0539777],[-10.8867416,11.0541454],[-10.8885098,11.0536964],[-10.8912097,11.0526829],[-10.8917109,11.0527431],[-10.8927502,11.0535948],[-10.8939633,11.054239],[-10.8950114,11.0545771],[-10.8960971,11.0545455],[-10.8966266,11.0541124],[-10.8968839,11.0530709],[-10.8987262,11.0520123],[-10.8992195,11.0509431],[-10.8986935,11.0492174],[-10.8997449,11.0476379],[-10.9005393,11.047124],[-10.9021777,11.0464886],[-10.9038862,11.0454266],[-10.9042088,11.0454162],[-10.9050962,11.0459325],[-10.9060241,11.0466895],[-10.9065859,11.0468788],[-10.9074529,11.0465182],[-10.9092764,11.0450148],[-10.9108694,11.0445306],[-10.9131142,11.0440236],[-10.9134656,11.0437993],[-10.913534,11.0435051],[-10.9134159,11.042609],[-10.9131036,11.0414133],[-10.9132825,11.0408263],[-10.914665,11.0394163],[-10.9149939,11.038488],[-10.9154189,11.0380149],[-10.916492,11.0372811],[-10.9170795,11.037026],[-10.9180331,11.0371385],[-10.9195745,11.0378609],[-10.9223042,11.0387753],[-10.9232565,11.0388713],[-10.9246524,11.0393526],[-10.9254329,11.0393796],[-10.9262185,11.0395588],[-10.9264589,11.0393829],[-10.9267313,11.0390354],[-10.9269747,11.0381186],[-10.927328,11.0362188],[-10.9270605,11.0347068],[-10.9267156,11.0336535],[-10.9257302,11.0327481],[-10.9249517,11.031927],[-10.9245625,11.0315164],[-10.92455,11.0309579],[-10.9249769,11.0308662],[-10.9255923,11.0310333],[-10.9265215,11.0314414],[-10.928493,11.0315551],[-10.9304645,11.0310958],[-10.9323606,11.0307473],[-10.933453,11.0300923],[-10.9340557,11.0291044],[-10.9324657,11.0274847],[-10.9315954,11.0267857],[-10.9305367,11.0263454],[-10.9295859,11.0256109],[-10.9294638,11.0249132],[-10.9299461,11.0239861],[-10.9307298,11.0233547],[-10.9309772,11.0234036],[-10.9312182,11.0234514],[-10.9316312,11.0239178],[-10.932382,11.0247027],[-10.9353966,11.0240336],[-10.9360931,11.0238345],[-10.9373113,11.023724],[-10.9379478,11.0234971],[-10.9383546,11.0234528],[-10.9386709,11.0236055],[-10.9391404,11.0259916],[-10.9394437,11.0265322],[-10.940176,11.0270433],[-10.9414989,11.0275654],[-10.9424871,11.027859],[-10.9430753,11.0278949],[-10.9436259,11.0278198],[-10.9437262,11.0275364],[-10.9437216,11.0268734],[-10.943403,11.0258161],[-10.9431674,11.0245857],[-10.942946,11.0209418],[-10.9425662,11.0190056],[-10.9427553,11.018234],[-10.9430357,11.0175746],[-10.9436628,11.0169945],[-10.944701,11.0168475],[-10.9462605,11.0169078],[-10.9474051,11.0165487],[-10.9482559,11.0168292],[-10.9491111,11.0173428],[-10.9497092,11.0175363],[-10.9521017,11.0176785],[-10.9535633,11.0177415],[-10.9553039,11.017531],[-10.9561718,11.0176567],[-10.9565035,11.0175896],[-10.957088,11.0168939],[-10.9569458,11.016162],[-10.9558219,11.0158661],[-10.9550228,11.0139609],[-10.9549909,11.0129986],[-10.9568987,11.009837],[-10.9577028,11.0087956],[-10.9589374,11.006837],[-10.9589335,11.0057515],[-10.9592163,11.0050171],[-10.9598213,11.0047124],[-10.9603628,11.0050936],[-10.9623048,11.0082319],[-10.9646758,11.0109912],[-10.9652332,11.0109672],[-10.9664973,11.0095794],[-10.9678646,11.0085037],[-10.9685562,11.0080472],[-10.9685597,11.0073303],[-10.9665892,11.0031443],[-10.9662312,11.0018776],[-10.9653253,11.0006499],[-10.9654591,10.9997383],[-10.9655772,10.9988905],[-10.9660611,10.9977718],[-10.9676746,10.9971317],[-10.9693644,10.9971106],[-10.972701,10.9974897],[-10.9751365,10.9988483],[-10.9764615,10.9993802],[-10.9778293,10.9996171],[-10.9788809,10.9994908],[-10.9794602,10.998922],[-10.9794388,10.9982901],[-10.9787735,10.9976582],[-10.9780494,10.9974055],[-10.9772823,10.9976582],[-10.9759626,10.9970684],[-10.9757052,10.9963523],[-10.9754905,10.9954254],[-10.9756837,10.9947093],[-10.9761771,10.9945407],[-10.9777168,10.9949516],[-10.9792564,10.9955308],[-10.9809462,10.9957941],[-10.9824213,10.9956783],[-10.9838913,10.994783],[-10.9851894,10.9935928],[-10.986434,10.993951],[-10.9875926,10.9945618],[-10.9886227,10.9949094],[-10.989164,10.9948446],[-10.9895667,10.9944986],[-10.9906182,10.9924555],[-10.9900461,10.9914443],[-10.9900298,10.9906981],[-10.9895842,10.9894085],[-10.9886932,10.9892457],[-10.9879751,10.9881094],[-10.9881737,10.9875492],[-10.9890584,10.9871523],[-10.9906259,10.9872232],[-10.9936181,10.9860242],[-10.9939649,10.9850762],[-10.9944044,10.9825721],[-10.9948321,10.9819936],[-10.9967381,10.9816248],[-10.9987401,10.9806256],[-10.9999371,10.9796734],[-11.0008583,10.9785748],[-11.0021254,10.977963],[-11.0028102,10.9770876],[-11.0045129,10.9771478],[-11.0060081,10.9766989],[-11.0061857,10.9761304],[-11.0047108,10.9746896],[-11.0047645,10.972767],[-11.0058448,10.9709328],[-11.0063151,10.9696357],[-11.0073105,10.969109],[-11.0081098,10.9695548],[-11.0095051,10.9724721],[-11.0108564,10.9748441],[-11.0121046,10.975558],[-11.0142363,10.9756387],[-11.01478,10.9752894],[-11.0148976,10.9741029],[-11.0161345,10.9738676],[-11.0167122,10.9733088],[-11.0196633,10.9656839],[-11.0208062,10.9648744],[-11.0224116,10.9639439],[-11.0244895,10.9632307],[-11.0269169,10.962048],[-11.0289236,10.961609],[-11.0302513,10.9617758],[-11.0318758,10.9627337],[-11.0328763,10.9626864],[-11.0335707,10.9623134],[-11.034756,10.9596136],[-11.0352051,10.9595149],[-11.035851,10.9596618],[-11.0366518,10.9597215],[-11.0377542,10.9592304],[-11.0383166,10.9580924],[-11.037835,10.957154],[-11.0381236,10.9566987],[-11.0390884,10.9558582],[-11.0405104,10.9540473],[-11.0432298,10.9534827],[-11.0467417,10.9524561],[-11.0501761,10.9528312],[-11.0509037,10.9527105],[-11.0542184,10.9491081],[-11.0564382,10.9490554],[-11.0585818,10.9481324],[-11.0606707,10.9482513],[-11.0638747,10.9476701],[-11.0651823,10.9474703],[-11.0655109,10.947668],[-11.0652276,10.9489538],[-11.065611,10.9495109],[-11.067214,10.9499499],[-11.0677156,10.9495661],[-11.0679352,10.9485149],[-11.0683079,10.9479687],[-11.0679859,10.9469415],[-11.0671606,10.9463333],[-11.0674224,10.9456583],[-11.0705446,10.9444141],[-11.0714278,10.9436251],[-11.0723618,10.9426684],[-11.0726723,10.9420661],[-11.0726079,10.9417922],[-11.0706852,10.9393001],[-11.0708724,10.9389134],[-11.0716811,10.938927],[-11.0730585,10.9393273],[-11.0750869,10.9419797],[-11.0765006,10.9421889],[-11.078144,10.9421082],[-11.0781031,10.9414588],[-11.076363,10.9381053],[-11.0757177,10.9364613],[-11.0760447,10.9360941],[-11.0806638,10.9356275],[-11.0813199,10.935376],[-11.0819201,10.9346016],[-11.0834226,10.931806],[-11.0839464,10.9305191],[-11.0838509,10.928515],[-11.0879608,10.925533],[-11.0892334,10.9236334],[-11.0911595,10.9205159],[-11.0926748,10.9187502],[-11.0945548,10.9180656],[-11.0962734,10.9180261],[-11.0974668,10.9190281],[-11.1007045,10.9196169],[-11.1030025,10.9195861],[-11.103848,10.9194098],[-11.1040834,10.918841],[-11.1033532,10.9167761],[-11.1036593,10.9140916],[-11.1039319,10.9133846],[-11.1049307,10.9125078],[-11.1065381,10.9116769],[-11.1076574,10.9116401],[-11.1087836,10.9119201],[-11.1092917,10.9125495],[-11.109132,10.9133806],[-11.1093748,10.9136928],[-11.1099892,10.9136953],[-11.1105478,10.9133195],[-11.110873,10.9122867],[-11.1110006,10.9110576],[-11.1115692,10.909486],[-11.1116961,10.9075494],[-11.1119505,10.9073638],[-11.11219,10.9074845],[-11.1122886,10.9081852],[-11.1138246,10.9085562],[-11.1156094,10.90722],[-11.1171137,10.9061867],[-11.1176346,10.9063089],[-11.1187956,10.90711],[-11.1197056,10.9073521],[-11.1201607,10.9076109],[-11.1216325,10.9075736],[-11.1223196,10.9072118],[-11.1227683,10.9071342],[-11.1245845,10.9049815],[-11.1255977,10.9045937],[-11.1262604,10.9042128],[-11.1262556,10.9034483],[-11.1259377,10.9025908],[-11.1254304,10.9017954],[-11.1254437,10.9013382],[-11.1259201,10.9009856],[-11.1268386,10.9005477],[-11.1274767,10.8998856],[-11.128227,10.8989756],[-11.1290123,10.8983538],[-11.1299049,10.897992],[-11.1314292,10.8969491],[-11.1314805,10.8966755],[-11.1304682,10.894912],[-11.1304576,10.8942978],[-11.130811,10.8936578],[-11.1325328,10.8925466],[-11.1333077,10.8915385],[-11.1345003,10.8890944],[-11.1344896,10.8884683],[-11.1333642,10.8873922],[-11.1333632,10.8869841],[-11.1339757,10.885886],[-11.135019,10.8853856],[-11.1361118,10.8845325],[-11.1365483,10.8839881],[-11.1398645,10.8820681],[-11.1405614,10.8810425],[-11.141608,10.8803235],[-11.1426235,10.8801264],[-11.1432427,10.8794804],[-11.1454968,10.8790839],[-11.1461227,10.8791753],[-11.146581,10.8796562],[-11.1478854,10.8802228],[-11.1485809,10.8802872],[-11.1494171,10.8805094],[-11.1496835,10.8803546],[-11.1499438,10.8799719],[-11.1498204,10.8795592],[-11.148719,10.8789528],[-11.1483321,10.8783897],[-11.1483839,10.8772948],[-11.1481973,10.8762964],[-11.1487915,10.8750492],[-11.1491629,10.8747661],[-11.1495963,10.8746793],[-11.1510949,10.875219],[-11.1522357,10.8752132],[-11.152725,10.8753499],[-11.153078,10.8752758],[-11.1533753,10.8747331],[-11.1534062,10.8732647],[-11.1535115,10.8724924],[-11.1538397,10.8716766],[-11.1547975,10.8710194],[-11.1559762,10.8704657],[-11.1573582,10.8701463],[-11.1578485,10.8703013],[-11.1581191,10.8706911],[-11.1603671,10.8702525],[-11.1610461,10.8701523],[-11.1619773,10.8691406],[-11.1618101,10.8683954],[-11.1622692,10.8671012],[-11.162412,10.8662959],[-11.1627374,10.8657656],[-11.1633521,10.8657254],[-11.1643222,10.865827],[-11.1647472,10.8660867],[-11.1653243,10.8659856],[-11.1642536,10.8608606],[-11.1700472,10.854686],[-11.1807546,10.8508717],[-11.1852607,10.8460246],[-11.1925992,10.8414936],[-11.1983499,10.8383534],[-11.2011394,10.8337591],[-11.2068042,10.8332954],[-11.2121257,10.8411142],[-11.2210092,10.84358],[-11.2279829,10.8489961],[-11.2322959,10.85496],[-11.2342057,10.858395],[-11.2391624,10.8640005],[-11.2419304,10.8703434],[-11.2437972,10.8718396],[-11.2430891,10.8756537],[-11.2440804,10.8815987],[-11.2443486,10.8817514],[-11.2451023,10.8816698],[-11.245451,10.8817646],[-11.2457567,10.8817304],[-11.2462503,10.8819121],[-11.2473017,10.8818963],[-11.2477067,10.8820017],[-11.2485845,10.8825237],[-11.2486938,10.8828314],[-11.2487447,10.8832976],[-11.2484443,10.8841694],[-11.2484765,10.8843959],[-11.2493348,10.8849939],[-11.2493831,10.8852757],[-11.2491927,10.8856998],[-11.2489432,10.8859737],[-11.2481171,10.8858657],[-11.2478408,10.8859816],[-11.2475404,10.8859342],[-11.247358,10.8860711],[-11.246489,10.8863846],[-11.2462583,10.8866137],[-11.2461376,10.8868587],[-11.246151,10.8872907],[-11.2464595,10.8878859],[-11.2467223,10.8882204],[-11.2469879,10.8883469],[-11.2475351,10.888871],[-11.2480018,10.8901985],[-11.2482351,10.8904092],[-11.2482539,10.8904961],[-11.2483639,10.890612],[-11.2488252,10.8915471],[-11.2488601,10.8918447],[-11.2489969,10.892037],[-11.248962,10.8923478],[-11.2491497,10.893504],[-11.249477,10.8940887],[-11.2497774,10.8951239],[-11.2499812,10.8954241],[-11.2501314,10.8955242],[-11.2505069,10.8959219],[-11.2507376,10.8966726],[-11.2505472,10.8975628],[-11.2507946,10.8989382],[-11.2507242,10.8993248],[-11.2510192,10.8999596],[-11.2514913,10.9003336],[-11.252237,10.901611],[-11.2520251,10.9024064],[-11.2522316,10.9032071],[-11.2521726,10.9037444],[-11.2522209,10.9040815],[-11.2521002,10.9042948],[-11.2520278,10.9045661],[-11.2515315,10.9051929],[-11.2513411,10.9061385],[-11.2515181,10.9065243],[-11.2517649,10.9067521],[-11.2522692,10.9069299],[-11.2524623,10.9069813],[-11.2525213,10.9071525],[-11.2526152,10.9072012],[-11.2528123,10.9072183],[-11.2528431,10.9072749],[-11.2529196,10.9072986],[-11.252933,10.9073539],[-11.2528726,10.9074198],[-11.2528713,10.9074751],[-11.2529357,10.9075317],[-11.2530658,10.9075159],[-11.253503,10.9077609],[-11.2536076,10.9080848],[-11.2541199,10.9090567],[-11.2540635,10.9101681],[-11.2541521,10.9102945],[-11.2541842,10.9106264],[-11.254651,10.911485],[-11.2546214,10.9121039],[-11.2546375,10.9126254],[-11.2545383,10.9131034],[-11.2546268,10.9135735],[-11.2549031,10.9138632],[-11.2548977,10.914145],[-11.2549728,10.9142688],[-11.2550855,10.9142793],[-11.2553537,10.9140344],[-11.2558097,10.9139317],[-11.2561637,10.9140607],[-11.2567484,10.9147586],[-11.2574056,10.9152722],[-11.2576309,10.9153328],[-11.2581003,10.9152828],[-11.2585455,10.9155171],[-11.258685,10.9155224],[-11.2587681,10.9154092],[-11.2587521,10.915238],[-11.2588325,10.9151195],[-11.2589639,10.9150905],[-11.2594306,10.9152669],[-11.2597096,10.9152274],[-11.2597874,10.9151116],[-11.2597767,10.9148903],[-11.2598303,10.9147903],[-11.2600985,10.9147929],[-11.2603185,10.9149588],[-11.2605357,10.9150088],[-11.261268,10.9147824],[-11.261386,10.914569],[-11.261614,10.9144874],[-11.2620217,10.9145269],[-11.2623596,10.9147112],[-11.2627324,10.9147718],[-11.2631348,10.9149562],[-11.2635398,10.9149878],[-11.26369,10.9151721],[-11.263572,10.915425],[-11.2636176,10.917017],[-11.2637262,10.9171908],[-11.2637517,10.9175372],[-11.2637892,10.9176899],[-11.2639046,10.9177321],[-11.2641192,10.9176188],[-11.2641889,10.9174371],[-11.2642613,10.9173528],[-11.2643552,10.9173133],[-11.2644115,10.917395],[-11.2645644,10.9174845],[-11.2646824,10.9174529],[-11.2647334,10.9172791],[-11.2648004,10.9171527],[-11.2648729,10.9171132],[-11.264948,10.9171579],[-11.2650231,10.9173397],[-11.2651679,10.9173581],[-11.2653288,10.9171816],[-11.2655112,10.9171658],[-11.2656641,10.9172369],[-11.2657177,10.917395],[-11.2656319,10.917927],[-11.2658143,10.9180823],[-11.2661094,10.9181903],[-11.2663186,10.9181166],[-11.2666029,10.9174318],[-11.2671155,10.9168052],[-11.2675336,10.9162941],[-11.2677214,10.9162677],[-11.2678447,10.9163204],[-11.2679279,10.9163073],[-11.2679708,10.9162098],[-11.2678528,10.9159254],[-11.2678555,10.9154197],[-11.2680566,10.9152801],[-11.2683088,10.9152538],[-11.2685663,10.9153776],[-11.2686601,10.9156278],[-11.2687379,10.9157147],[-11.268864,10.9157621],[-11.2689927,10.9157173],[-11.269269,10.9152064],[-11.2694165,10.9151695],[-11.2696928,10.9153223],[-11.2698832,10.9152959],[-11.2699986,10.9151563],[-11.2702158,10.9151326],[-11.2703392,10.9150194],[-11.270364,10.9148882],[-11.2704277,10.914785],[-11.2707576,10.9147692],[-11.2716723,10.9151063],[-11.2720451,10.9154987],[-11.2724635,10.9156199],[-11.2727666,10.9156725],[-11.2729812,10.9155514],[-11.2730429,10.9153776],[-11.2728176,10.9150457],[-11.2728739,10.9148653],[-11.273004,10.9147929],[-11.2737107,10.9150707],[-11.2739119,10.9150721],[-11.2741439,10.9150023],[-11.2743209,10.9147837],[-11.2745316,10.9147789],[-11.2746093,10.9147771],[-11.2754032,10.9153091],[-11.2754729,10.9153354],[-11.275548,10.9153223],[-11.2756124,10.9152538],[-11.2756553,10.9151879],[-11.2754568,10.9148298],[-11.2754622,10.9147613],[-11.2755568,10.9146986],[-11.2758592,10.9148482],[-11.2761515,10.9147455],[-11.2762937,10.9144926],[-11.2771761,10.9140238],[-11.277447,10.9139448],[-11.277726,10.9138342],[-11.2778172,10.9136999],[-11.2779781,10.9135656],[-11.278131,10.9135551],[-11.2781954,10.9136314],[-11.278182,10.9137605],[-11.2782168,10.9138342],[-11.2783134,10.9138895],[-11.2784261,10.9138764],[-11.2789129,10.9130362],[-11.27922,10.9128123],[-11.2797108,10.9128703],[-11.2798449,10.9128071],[-11.2799388,10.9126122],[-11.2798476,10.9119274],[-11.2800273,10.9117562],[-11.2804592,10.9116588],[-11.28084,10.9117536],[-11.2811244,10.9123646],[-11.2813094,10.9124831],[-11.281634,10.9125253],[-11.2819827,10.912391],[-11.2824494,10.9114349],[-11.2838897,10.9105184],[-11.2843028,10.9105184],[-11.284909,10.9106079],[-11.2852415,10.910492],[-11.2856841,10.9104789],[-11.2861052,10.9108924],[-11.2863681,10.9114428],[-11.28658,10.9115587],[-11.2867892,10.9115982],[-11.2870923,10.9114349],[-11.2875322,10.9109529],[-11.287787,10.9108766],[-11.2880096,10.9106448],[-11.2880927,10.9101523],[-11.2882698,10.9098257],[-11.2887901,10.909536],[-11.2893024,10.9093806],[-11.2897262,10.9094254],[-11.2908232,10.909299],[-11.2915072,10.9094017],[-11.2918881,10.9096967],[-11.2928644,10.9102129],[-11.2930146,10.9103393],[-11.2930816,10.910579],[-11.2931541,10.9106738],[-11.293712,10.9107581],[-11.294412,10.9109766],[-11.2946132,10.9113164],[-11.2946749,10.9119327],[-11.2947902,10.9120486],[-11.2950987,10.9121302],[-11.295847,10.9120907],[-11.2963378,10.912225],[-11.2965792,10.9126912],[-11.2969306,10.9129835],[-11.2973517,10.9130757],[-11.2982315,10.9134787],[-11.2987706,10.9135656],[-11.2990871,10.9134576],[-11.2992749,10.9134892],[-11.2995484,10.9136472],[-11.2996665,10.9138579],[-11.2995672,10.9145875],[-11.299696,10.9156199],[-11.299991,10.9162151],[-11.3018042,10.9175793],[-11.302008,10.9179375],[-11.302405,10.9180534],[-11.3029951,10.9186064],[-11.3034886,10.918933],[-11.303612,10.9191121],[-11.3041699,10.9194755],[-11.3044113,10.9194334],[-11.3055861,10.9187223],[-11.3066375,10.9178954],[-11.3069446,10.9179744],[-11.3071471,10.9179849],[-11.3074154,10.9177913],[-11.3079599,10.9175503],[-11.3079987,10.9174331],[-11.3079129,10.9172712],[-11.3079692,10.9170908],[-11.3082804,10.91678],[-11.3089423,10.9165976],[-11.3092205,10.9166602],[-11.3098294,10.9172106],[-11.3106608,10.9173054],[-11.3128388,10.9161255],[-11.3148029,10.9158785],[-11.316777,10.9143404],[-11.3174844,10.9141608],[-11.3183534,10.9142293],[-11.3187933,10.9144821],[-11.3191795,10.9144242],[-11.3203275,10.9135709],[-11.321159,10.9134708],[-11.3222426,10.9140397],[-11.3235757,10.9144452],[-11.3243642,10.9153723],[-11.3248041,10.9155593],[-11.3250965,10.9155567],[-11.3253862,10.9152959],[-11.3261318,10.9153828],[-11.326679,10.915267],[-11.3273335,10.9153776],[-11.3275158,10.9152933],[-11.3277304,10.9151721],[-11.3278699,10.9152195],[-11.3278806,10.9153249],[-11.3278216,10.915446],[-11.3278377,10.9155409],[-11.3279879,10.9155619],[-11.3284814,10.9154302],[-11.3290393,10.9154566],[-11.3292378,10.9154302],[-11.3294631,10.9155725],[-11.329608,10.9155567],[-11.3299245,10.915288],[-11.3302732,10.9151669],[-11.330477,10.9151616],[-11.3306326,10.9153828],[-11.3307345,10.9154671],[-11.3309169,10.9154618],[-11.3312334,10.9153407],[-11.3314265,10.9151089],[-11.3316518,10.9147191],[-11.3319361,10.9146665],[-11.5958675,10.9206688]]]]}]}
