# Supplementary material
Source: ML conference proceedings conference paper supplement (https://proceedings.neurips.cc/paper_files/paper/2022/hash/9d3faa41886997cfc2128b930077fa49-Abstract.html)
Supplement: Supplementary file 1 [file 9d3faa41886997cfc2128b930077fa49-Supplemental-Conference.zip › code/ebola/map/geojson/dubreka.geojson]

{"type":"GeometryCollection","geometries":[{"type":"MultiPolygon","coordinates":[[[[-13.5658686,9.6896349],[-13.565968,9.6902583],[-13.5654798,9.6907422],[-13.5649138,9.6933676],[-13.5646671,9.6938646],[-13.5647207,9.6944648],[-13.5645491,9.6949249],[-13.5632992,9.6961146],[-13.5623403,9.6979488],[-13.5620935,9.6986997],[-13.562123,9.6992522],[-13.5618441,9.7003812],[-13.5619218,9.700635],[-13.562115,9.7009152],[-13.5621203,9.7010263],[-13.5622518,9.7011056],[-13.5624878,9.7012246],[-13.5624932,9.701407],[-13.5621069,9.7020732],[-13.5620989,9.7023085],[-13.5613344,9.7029417],[-13.560861,9.7030819],[-13.5608597,9.7035881],[-13.5603326,9.7036133],[-13.5603286,9.7040574],[-13.5597667,9.7045016],[-13.5589057,9.7047541],[-13.5569986,9.7047171],[-13.55562,9.7045267],[-13.5548636,9.7045294],[-13.5545578,9.704762],[-13.5520848,9.7051057],[-13.5520231,9.7046377],[-13.5514706,9.7045849],[-13.5507115,9.7063007],[-13.5504923,9.7067012],[-13.5484055,9.7087343],[-13.5476009,9.7097046],[-13.5473836,9.7100324],[-13.5471342,9.7113623],[-13.5461364,9.7118328],[-13.5458494,9.711817],[-13.5452486,9.7121633],[-13.5447262,9.7122354],[-13.5446363,9.7123398],[-13.5447731,9.7124786],[-13.5441629,9.7132545],[-13.5442206,9.7139948],[-13.5437499,9.7150681],[-13.5437686,9.7153986],[-13.5436667,9.7156128],[-13.5437445,9.7159736],[-13.5435447,9.7161441],[-13.5432255,9.7167469],[-13.5435635,9.71701],[-13.5433958,9.7171752],[-13.5431678,9.7169214],[-13.5425536,9.7174197],[-13.542213,9.7171091],[-13.5418495,9.7175651],[-13.54136,9.7178573],[-13.5407686,9.7178956],[-13.5402161,9.7181692],[-13.5400524,9.7183345],[-13.5397507,9.7184191],[-13.5395308,9.7182816],[-13.5397172,9.7190258],[-13.5386979,9.7192532],[-13.5386322,9.7195043],[-13.5379174,9.7202816],[-13.5375553,9.7200278],[-13.5368646,9.7198308],[-13.536414,9.7194951],[-13.5357783,9.7193867],[-13.5346894,9.7195797],[-13.5348724,9.719957],[-13.534851,9.72038],[-13.5346364,9.7206973],[-13.5332416,9.7208453],[-13.53307,9.7212154],[-13.5331665,9.7216913],[-13.5330593,9.7226113],[-13.5317503,9.7246417],[-13.5285102,9.7275074],[-13.5280274,9.7279092],[-13.5272536,9.7283031],[-13.5269532,9.7278696],[-13.5268674,9.7274149],[-13.5265562,9.7271664],[-13.5258481,9.7271981],[-13.5256362,9.7267857],[-13.5256255,9.7265028],[-13.5253251,9.7257626],[-13.5250649,9.7254295],[-13.5250515,9.7243112],[-13.5249764,9.7237719],[-13.5254351,9.7225267],[-13.5251803,9.7218446],[-13.5247887,9.7218182],[-13.5246707,9.7218499],[-13.5244158,9.7221513],[-13.5237775,9.7228043],[-13.5233161,9.7233542],[-13.5225598,9.7236133],[-13.5222593,9.723571],[-13.5222111,9.7237772],[-13.5226456,9.7242636],[-13.5230908,9.7250303],[-13.5229889,9.7252999],[-13.5231928,9.7258287],[-13.5237667,9.7261723],[-13.5239974,9.7264103],[-13.5245285,9.7274413],[-13.5248021,9.7282555],[-13.5249576,9.7307168],[-13.5245982,9.7314913],[-13.5242522,9.7317636],[-13.5235844,9.7325197],[-13.5231418,9.7330247],[-13.5227663,9.7336538],[-13.5225115,9.733741],[-13.5222245,9.7337543],[-13.5217926,9.7336617],[-13.5217229,9.7344601],[-13.5207305,9.7350311],[-13.5201726,9.7350576],[-13.5188422,9.7355387],[-13.517249,9.7354382],[-13.5171471,9.735306],[-13.5171953,9.7349254],[-13.5169486,9.7343596],[-13.5166213,9.734016],[-13.5163907,9.7335401],[-13.5164068,9.7322976],[-13.5169754,9.7318747],[-13.5172758,9.7310181],[-13.5174957,9.7307062],[-13.5174582,9.7302515],[-13.5170518,9.7295099],[-13.5166441,9.7295364],[-13.5142208,9.7297399],[-13.514255,9.7298503],[-13.515289,9.7308774],[-13.5148169,9.7315224],[-13.5145111,9.7329288],[-13.5143073,9.7331984],[-13.5127677,9.7343616],[-13.5127462,9.7344885],[-13.5130037,9.7345784],[-13.5129876,9.7347264],[-13.5127194,9.7349697],[-13.5128803,9.7356358],[-13.5128589,9.7362016],[-13.513567,9.7362386],[-13.5145433,9.7362068],[-13.5159112,9.7362544],[-13.5166622,9.7364765],[-13.5170753,9.7372326],[-13.5171182,9.7374969],[-13.5162116,9.7387394],[-13.5150905,9.7391676],[-13.5132022,9.742065],[-13.5132022,9.7427311],[-13.5130359,9.7430325],[-13.5130413,9.7437515],[-13.5157181,9.7440793],[-13.5158844,9.744534],[-13.51582,9.7475899],[-13.5162277,9.7487107],[-13.5161097,9.7494192],[-13.5151978,9.7495355],[-13.5149081,9.7491866],[-13.5140712,9.7472198],[-13.5128589,9.7462999],[-13.5120757,9.7463316],[-13.5122151,9.7476428],[-13.511904,9.7486367],[-13.511668,9.7489539],[-13.5113461,9.7499056],[-13.5111959,9.7508572],[-13.5098012,9.7517772],[-13.5086854,9.7518935],[-13.5081704,9.7518459],[-13.5078592,9.7516027],[-13.5077734,9.7514018],[-13.5071082,9.7514599],[-13.5067488,9.750963],[-13.5067112,9.7505189],[-13.5066415,9.7502704],[-13.5070117,9.7495989],[-13.5068561,9.7493134],[-13.5062177,9.7490438],[-13.50603,9.7485468],[-13.5062177,9.7477855],[-13.5066683,9.7474207],[-13.5070546,9.7468074],[-13.5076768,9.7467546],[-13.5078056,9.7464003],[-13.5067703,9.7461941],[-13.5065315,9.7459879],[-13.5063277,9.7456469],[-13.5063894,9.7441983],[-13.5060782,9.7436273],[-13.5056491,9.7433048],[-13.5050322,9.7431409],[-13.5051609,9.7444362],[-13.5051019,9.7453456],[-13.5051556,9.7462444],[-13.5046459,9.7474551],[-13.5038627,9.7481371],[-13.5035141,9.7498659],[-13.5037018,9.7503365],[-13.5041041,9.7507251],[-13.5042087,9.7509656],[-13.5040982,9.7512565],[-13.5039888,9.7515445],[-13.5038359,9.7516238],[-13.5033397,9.7517349],[-13.5031385,9.7519463],[-13.5036643,9.7520283],[-13.5038627,9.7521102],[-13.5039942,9.7524036],[-13.5045333,9.752364],[-13.5045896,9.7526574],[-13.5044823,9.7527711],[-13.5045574,9.7530883],[-13.5044716,9.753231],[-13.5038574,9.7536831],[-13.503742,9.7538602],[-13.5036589,9.7538311],[-13.5034175,9.754447],[-13.5035167,9.7547087],[-13.5037045,9.754981],[-13.5036321,9.7551687],[-13.5032646,9.7553141],[-13.5032271,9.7552453],[-13.5029508,9.7553775],[-13.5033746,9.7559115],[-13.503388,9.7562049],[-13.5032432,9.7563318],[-13.5015319,9.7566199],[-13.5007138,9.7570534],[-13.5000299,9.7573284],[-13.4995337,9.7577196],[-13.4992198,9.7572411],[-13.4991635,9.7572861],[-13.4992896,9.7574922],[-13.4991555,9.7578623],[-13.4988121,9.7579919],[-13.49878,9.7586289],[-13.4985064,9.7590254],[-13.4984286,9.759295],[-13.4979377,9.7594669],[-13.4973235,9.7595012],[-13.4973235,9.7596493],[-13.4977983,9.7598766],[-13.4975461,9.7602308],[-13.497522,9.7604264],[-13.4970955,9.760696],[-13.4969721,9.7608864],[-13.4967898,9.760926],[-13.4964438,9.7608679],[-13.4961514,9.7611058],[-13.4958376,9.7612194],[-13.4953092,9.7609895],[-13.494998,9.7610635],[-13.4946494,9.7609577],[-13.4943194,9.7606035],[-13.4938125,9.7605507],[-13.4935416,9.7606167],[-13.4936424,9.7608217],[-13.4934573,9.7612526],[-13.4931649,9.7614244],[-13.493063,9.7617046],[-13.4934305,9.7621645],[-13.4934814,9.7623337],[-13.4938462,9.7623839],[-13.494262,9.762598],[-13.4944229,9.7625293],[-13.4949432,9.7627144],[-13.4950318,9.7625795],[-13.4952946,9.7624976],[-13.495485,9.7625531],[-13.4950398,9.7633435],[-13.4948064,9.7635919],[-13.4946053,9.7636898],[-13.494388,9.76351],[-13.4942646,9.7635946],[-13.4937631,9.7639858],[-13.4932239,9.7645806],[-13.4930925,9.7645462],[-13.4929638,9.764229],[-13.4929074,9.7642369],[-13.4927519,9.7645277],[-13.4925561,9.7645594],[-13.4924139,9.7648502],[-13.4925024,9.765215],[-13.4926607,9.7652758],[-13.492827,9.7650458],[-13.4929933,9.7650749],[-13.4929691,9.7653128],[-13.4936209,9.7651039],[-13.4935914,9.7653286],[-13.4937497,9.7654952],[-13.4936102,9.7658626],[-13.4939884,9.7661454],[-13.4938945,9.766423],[-13.4934788,9.7668723],[-13.4934412,9.7672794],[-13.493063,9.7675543],[-13.4931327,9.7677473],[-13.493291,9.7678081],[-13.4929423,9.767964],[-13.4929209,9.7679085],[-13.4926365,9.7680645],[-13.4926473,9.768157],[-13.4930255,9.7680671],[-13.4930871,9.76812],[-13.4934358,9.7680883],[-13.4938113,9.7675437],[-13.4941037,9.7672953],[-13.4942378,9.7669675],[-13.4940903,9.7668776],[-13.4940876,9.766793],[-13.4942754,9.7665684],[-13.4945624,9.7666609],[-13.4950586,9.7666609],[-13.4953831,9.7661428],[-13.4955843,9.7661296],[-13.4956916,9.7662935],[-13.4956406,9.7667349],[-13.4956916,9.7672318],[-13.4956406,9.7677129],[-13.4969817,9.767927],[-13.4966491,9.7687597],[-13.4967618,9.7689685],[-13.4968288,9.7693703],[-13.4970407,9.7693624],[-13.4971695,9.7696981],[-13.4967296,9.7701474],[-13.4961744,9.7703985],[-13.4960993,9.7721114],[-13.495882,9.7723678],[-13.4955736,9.7725105],[-13.495654,9.7726585],[-13.4952302,9.7729387],[-13.4953134,9.7730101],[-13.4956782,9.7729282],[-13.4959169,9.7729334],[-13.495941,9.7729969],[-13.4967242,9.7731132],[-13.4966491,9.773589],[-13.496861,9.7735705],[-13.4971507,9.7724365],[-13.4970836,9.772307],[-13.4974645,9.7714717],[-13.4971024,9.7712047],[-13.4970407,9.7707686],[-13.4973277,9.7699677],[-13.4975047,9.7699703],[-13.4979366,9.7702267],[-13.4985884,9.7699492],[-13.4988754,9.7696716],[-13.4989505,9.7693306],[-13.4990685,9.7689659],[-13.4992723,9.7688654],[-13.4993823,9.7688522],[-13.4994091,9.7685429],[-13.4986983,9.767972],[-13.4979768,9.7671578],[-13.4980466,9.7666794],[-13.4979661,9.7659419],[-13.4982236,9.7656987],[-13.4981833,9.7653048],[-13.4982719,9.7650194],[-13.4981887,9.7646096],[-13.4987064,9.7637796],[-13.4994654,9.7632404],[-13.5000689,9.7625372],[-13.5004069,9.7624262],[-13.5007636,9.7620826],[-13.5011499,9.7621407],[-13.5016246,9.7623073],[-13.5024427,9.7619927],[-13.5026117,9.7620694],[-13.5028665,9.7626562],[-13.5028021,9.762902],[-13.503014,9.7630791],[-13.5031401,9.7634941],[-13.503073,9.7636633],[-13.5035022,9.7641814],[-13.5040413,9.7640678],[-13.5042961,9.7642343],[-13.5048325,9.7643559],[-13.5050176,9.7645462],[-13.5050042,9.7648317],[-13.5053797,9.7652784],[-13.5053046,9.7676336],[-13.5049318,9.7675385],[-13.5037543,9.7684504],[-13.5033493,9.7684927],[-13.5032125,9.7689659],[-13.5033788,9.7692778],[-13.5031374,9.7694602],[-13.503073,9.7700232],[-13.5028584,9.7701316],[-13.5021477,9.7709827],[-13.5021155,9.7716779],[-13.5017936,9.7717757],[-13.5016944,9.7717281],[-13.5015281,9.771855],[-13.5018097,9.7723414],[-13.5019438,9.7723651],[-13.5020216,9.7722594],[-13.5024561,9.7724418],[-13.5026063,9.7726506],[-13.5029362,9.7726797],[-13.503132,9.7728304],[-13.5033922,9.7728885],[-13.5037677,9.7730313],[-13.5042317,9.7736577],[-13.5047521,9.7738348],[-13.5049371,9.7735837],[-13.5051785,9.7736339],[-13.505436,9.773507],[-13.5055621,9.7740146],[-13.5055514,9.7742287],[-13.5052644,9.7743873],[-13.5056399,9.7746199],[-13.5056211,9.7748102],[-13.5054253,9.7749873],[-13.5052215,9.775056],[-13.504913,9.7753071],[-13.5043041,9.7752542],[-13.504162,9.7754763],[-13.5035236,9.7754842],[-13.5032742,9.7757697],[-13.5029094,9.7757723],[-13.5022737,9.7753388],[-13.5018177,9.7757221],[-13.5016273,9.7760737],[-13.5017239,9.7762772],[-13.5016944,9.7764728],[-13.5011821,9.7765732],[-13.5013028,9.7774323],[-13.5010399,9.7774746],[-13.5010077,9.7776913],[-13.4987305,9.7777178],[-13.4979312,9.7772288],[-13.4978668,9.7772658],[-13.4975718,9.7771891],[-13.4974216,9.7770252],[-13.496861,9.7770543],[-13.4965257,9.776938],[-13.4963219,9.7770067],[-13.4958981,9.777686],[-13.4957211,9.7775512],[-13.4952892,9.7781618],[-13.4953751,9.7786006],[-13.4956916,9.7787433],[-13.4961958,9.7788649],[-13.4961529,9.7793513],[-13.4957774,9.7795997],[-13.4954287,9.7796896],[-13.4951337,9.7799487],[-13.4948869,9.7799751],[-13.4946884,9.7796949],[-13.4946026,9.7795469],[-13.4942164,9.7791663],[-13.4936799,9.779309],[-13.4933259,9.7792403],[-13.4930308,9.7791768],[-13.4927787,9.7792403],[-13.4927626,9.7794412],[-13.4924246,9.7795363],[-13.4918453,9.7793196],[-13.4915878,9.7790129],[-13.4912445,9.7789337],[-13.4911801,9.7794041],[-13.4918775,9.7797213],[-13.4920009,9.7800808],[-13.4928538,9.7799645],[-13.4929664,9.7800597],[-13.4928002,9.7802288],[-13.4920116,9.7806147],[-13.492092,9.7808156],[-13.4928699,9.7809055],[-13.493283,9.780657],[-13.4937014,9.7807416],[-13.4937765,9.7812808],[-13.4936585,9.7814289],[-13.4936424,9.7818042],[-13.4937926,9.7820104],[-13.4936853,9.7823381],[-13.4927626,9.7827452],[-13.4923764,9.7835434],[-13.4921672,9.7850197],[-13.4924154,9.7850408],[-13.4924207,9.7853501],[-13.4926594,9.7854743],[-13.4924475,9.786106],[-13.4920452,9.7860479],[-13.4917314,9.7857518],[-13.4908033,9.7867985],[-13.4906907,9.7869994],[-13.4903822,9.7872849],[-13.4900738,9.7874144],[-13.4900014,9.7875386],[-13.4905502,9.787302],[-13.490813,9.7872821],[-13.4911376,9.7871196],[-13.4913146,9.7874077],[-13.4913589,9.7883513],[-13.4924666,9.7869227],[-13.4945574,9.7858376],[-13.4947197,9.7859447],[-13.4946432,9.7856394],[-13.4941081,9.7853064],[-13.4941604,9.7838315],[-13.4968561,9.7819733],[-13.497717,9.7819125],[-13.4978056,9.7814843],[-13.4976983,9.7811909],[-13.4980523,9.7804825],[-13.5001552,9.7816112],[-13.5004449,9.7818438],[-13.5004985,9.7821689],[-13.5002625,9.7823645],[-13.5004449,9.78279],[-13.500418,9.7830279],[-13.5001659,9.7830253],[-13.5001686,9.7833795],[-13.5005065,9.7834905],[-13.500638,9.7845055],[-13.5001605,9.7846112],[-13.5003322,9.784939],[-13.5006058,9.7849971],[-13.5008016,9.7861892],[-13.5011315,9.7863372],[-13.5012227,9.786813],[-13.5007292,9.7885152],[-13.5011912,9.7887392],[-13.501277,9.7885502],[-13.502362,9.7878088],[-13.5026396,9.7878577],[-13.5024505,9.7877361],[-13.502543,9.7875128],[-13.5026905,9.7876],[-13.5028059,9.7873898],[-13.5026503,9.787259],[-13.502948,9.7870291],[-13.5040035,9.7858357],[-13.5035743,9.7852964],[-13.502952,9.7850903],[-13.5027107,9.7846727],[-13.5026892,9.7841546],[-13.5024049,9.7836735],[-13.5021796,9.7832189],[-13.5021313,9.7819819],[-13.5026409,9.7814004],[-13.5031398,9.7811625],[-13.5025283,9.780507],[-13.5021688,9.7800788],[-13.5018577,9.7793109],[-13.5018631,9.7789686],[-13.5039981,9.7787188],[-13.5040826,9.7792779],[-13.505295,9.7790809],[-13.5056973,9.7792395],[-13.506561,9.7799215],[-13.5058636,9.780881],[-13.5063249,9.781362],[-13.5072825,9.7819065],[-13.5083554,9.7823665],[-13.5090011,9.7819706],[-13.5090836,9.7820803],[-13.5090004,9.7828621],[-13.5108327,9.7835837],[-13.5111656,9.7825591],[-13.5114714,9.7824428],[-13.5114741,9.7823569],[-13.5115841,9.7821401],[-13.511576,9.779226],[-13.5113185,9.7788718],[-13.5112702,9.7782268],[-13.5115975,9.7778304],[-13.5117048,9.7774127],[-13.5118389,9.7773493],[-13.512209,9.7764611],[-13.5129279,9.7762338],[-13.5133195,9.7759642],[-13.5138398,9.7759748],[-13.5140383,9.775351],[-13.5141617,9.7745474],[-13.51399,9.774262],[-13.5143816,9.7742725],[-13.5158354,9.7739342],[-13.5160607,9.7737016],[-13.5163611,9.7736699],[-13.5166615,9.77478],[-13.5165006,9.7756735],[-13.5163182,9.7759801],[-13.51583,9.7764347],[-13.5153311,9.7766673],[-13.5151092,9.7771398],[-13.5149288,9.7775237],[-13.5148483,9.7783537],[-13.5162377,9.7786339],[-13.5165167,9.779004],[-13.5165113,9.7794692],[-13.5163396,9.7800454],[-13.5162002,9.780167],[-13.515476,9.7804366],[-13.5151219,9.7803097],[-13.5150522,9.7805317],[-13.5155779,9.7810815],[-13.5160513,9.7813604],[-13.5160258,9.7817516],[-13.5153056,9.7828327],[-13.5155832,9.783023],[-13.5160567,9.782526],[-13.5163329,9.7825009],[-13.5163624,9.7823807],[-13.5167205,9.7814727],[-13.5166078,9.7811661],[-13.5171362,9.7799714],[-13.5178913,9.7799714],[-13.5180562,9.7793396],[-13.5181903,9.7781964],[-13.5190996,9.7778541],[-13.5201685,9.7774947],[-13.520308,9.7773321],[-13.521755,9.7770546],[-13.522667,9.777077],[-13.5229486,9.7774762],[-13.5223035,9.7781449],[-13.5219173,9.7783075],[-13.5218033,9.7787264],[-13.5214734,9.7789696],[-13.521413,9.779222],[-13.521,9.7795577],[-13.5197729,9.7810868],[-13.5188327,9.7848706],[-13.5188891,9.7859992],[-13.5192458,9.7860831],[-13.5197313,9.7845679],[-13.5204743,9.7839521],[-13.5209758,9.7837697],[-13.521295,9.7837538],[-13.5214103,9.7836296],[-13.521531,9.7829529],[-13.5217161,9.7822683],[-13.52284,9.781967],[-13.5231538,9.7814225],[-13.5246639,9.7815837],[-13.5252969,9.7819194],[-13.5259486,9.7815758],[-13.5263027,9.781515],[-13.5267694,9.7816498],[-13.5284994,9.7802436],[-13.5285906,9.780122],[-13.5285745,9.7800163],[-13.527676,9.7789537],[-13.5274265,9.7785229],[-13.5269116,9.7759536],[-13.5269303,9.7757237],[-13.5270081,9.77561],[-13.5269035,9.7753008],[-13.5272388,9.7740346],[-13.5275714,9.7739606],[-13.5284002,9.773884],[-13.5290654,9.7745976],[-13.5298513,9.7742963],[-13.530275,9.7742329],[-13.5309885,9.7742831],[-13.5314472,9.7744338],[-13.531887,9.7749175],[-13.5322679,9.7747853],[-13.5325978,9.7744761],[-13.5326595,9.7742434],[-13.5327588,9.7739421],[-13.5330458,9.7737307],[-13.5333006,9.7737122],[-13.5336627,9.7739289],[-13.5337083,9.7742038],[-13.5336305,9.7745078],[-13.5339309,9.7748223],[-13.5342179,9.7751845],[-13.5348616,9.7763026],[-13.5354256,9.7772607],[-13.5356676,9.777603],[-13.5361886,9.7779823],[-13.5368895,9.778468],[-13.5372033,9.7786663],[-13.5381608,9.7786398],[-13.5389923,9.778661],[-13.5398104,9.7788566],[-13.5404702,9.77892],[-13.5417818,9.7787324],[-13.5434046,9.7779711],[-13.5440805,9.7778627],[-13.5442146,9.777757],[-13.5444157,9.7776618],[-13.5445794,9.7774107],[-13.5455101,9.7767156],[-13.5461404,9.7764645],[-13.5471784,9.7764354],[-13.5475432,9.776549],[-13.5479697,9.7770592],[-13.54849,9.7782116],[-13.5488173,9.7788936],[-13.5489675,9.7794593],[-13.5494127,9.7822505],[-13.5494959,9.7824064],[-13.5494932,9.7828003],[-13.549579,9.7831941],[-13.5496943,9.7841668],[-13.5495897,9.7854752],[-13.5498365,9.7856364],[-13.5501932,9.7857237],[-13.55044,9.7864902],[-13.5506036,9.7865774],[-13.5503287,9.7878871],[-13.5498942,9.7877483],[-13.5495549,9.787751],[-13.5492813,9.7878633],[-13.5486617,9.7878356],[-13.5480273,9.787747],[-13.5474802,9.7879122],[-13.5470953,9.7881091],[-13.5467224,9.7882175],[-13.5466661,9.7885545],[-13.546414,9.7885822],[-13.5462504,9.7886668],[-13.5463899,9.7889219],[-13.5466165,9.7891505],[-13.5466916,9.7893276],[-13.5466943,9.7895562],[-13.5468861,9.7898351],[-13.547051,9.7899144],[-13.5473045,9.7902184],[-13.5473072,9.7904496],[-13.547165,9.7906386],[-13.5471664,9.7908065],[-13.5468069,9.7909756],[-13.5467761,9.7910827],[-13.5464167,9.7910787],[-13.5463067,9.7908316],[-13.5457488,9.7908302],[-13.5456402,9.7909717],[-13.5455315,9.7909717],[-13.5454779,9.7910787],[-13.5453907,9.791084],[-13.54503,9.7913338],[-13.5448597,9.7913932],[-13.5447765,9.7916364],[-13.5448597,9.7919338],[-13.5448342,9.7922509],[-13.544692,9.7923884],[-13.5444453,9.7923315],[-13.5442481,9.792169],[-13.5441368,9.7919166],[-13.5440563,9.791943],[-13.5440335,9.7917395],[-13.5439464,9.7914197],[-13.5438069,9.791417],[-13.5436111,9.7915254],[-13.543418,9.7913602],[-13.5433858,9.7914712],[-13.5433898,9.7916959],[-13.5429177,9.7913576],[-13.542443,9.7911897],[-13.5423612,9.7913628],[-13.5425543,9.7917487],[-13.5424993,9.7918069],[-13.5422472,9.7916932],[-13.5421721,9.7918333],[-13.5419964,9.7918888],[-13.5417751,9.7919998],[-13.541696,9.7919404],[-13.5417228,9.791721],[-13.5415753,9.7916919],[-13.5414224,9.7917263],[-13.5413312,9.7916364],[-13.541299,9.7915518],[-13.5411086,9.791499],[-13.5409772,9.791528],[-13.5408913,9.7918531],[-13.5408565,9.7922708],[-13.5406419,9.7923104],[-13.5401081,9.7922523],[-13.5400598,9.7923078],[-13.5401349,9.7928285],[-13.5399767,9.7929976],[-13.5392498,9.7929976],[-13.5391077,9.7909968],[-13.5392149,9.7901906],[-13.5383057,9.789551],[-13.5386302,9.7891122],[-13.5385256,9.7885836],[-13.5370611,9.7884091],[-13.5368036,9.7887501],[-13.5356396,9.7891651],[-13.5353016,9.7891677],[-13.5352801,9.7895298],[-13.5352292,9.7896197],[-13.5344487,9.7896408],[-13.534395,9.7892311],[-13.5338908,9.7891016],[-13.5333275,9.7888955],[-13.5325416,9.7890633],[-13.532319,9.7890593],[-13.5322385,9.7890052],[-13.5321633,9.7889496],[-13.5320761,9.7889258],[-13.5319669,9.7889906],[-13.5319483,9.7893076],[-13.529875,9.7897728],[-13.529757,9.7902935],[-13.5284963,9.7910733],[-13.5279304,9.7909332],[-13.5274878,9.7915041],[-13.5268816,9.7916785],[-13.5267556,9.7919111],[-13.5260475,9.7926195],[-13.5253206,9.7928362],[-13.5254654,9.7935922],[-13.5238668,9.7939648],[-13.5232526,9.7940151],[-13.5216424,9.7946535],[-13.5209839,9.7949733],[-13.5208109,9.7949072],[-13.5207371,9.7933095],[-13.5203455,9.7928522],[-13.5199941,9.7928363],[-13.5197661,9.7934733],[-13.5193504,9.7932513],[-13.51894,9.7932513],[-13.5188462,9.7933465],[-13.5188488,9.7942531],[-13.5185136,9.7947817],[-13.5178752,9.7952442],[-13.5174071,9.7951676],[-13.5169606,9.7947777],[-13.5167648,9.7944143],[-13.5167406,9.7939967],[-13.5159889,9.7928595],[-13.5154351,9.7928608],[-13.5159889,9.7936643],[-13.5157395,9.7946627],[-13.5157951,9.7952489],[-13.5163229,9.7951656],[-13.5164623,9.7954154],[-13.516518,9.7956955],[-13.516684,9.7960831],[-13.5166836,9.7964191],[-13.5165455,9.7966094],[-13.5162142,9.7967468],[-13.5158468,9.7966371],[-13.5145754,9.7965816],[-13.5143501,9.7968578],[-13.5142629,9.797031],[-13.5125584,9.7992548],[-13.5103375,9.8020102],[-13.5105762,9.802108],[-13.5106232,9.8021648],[-13.5106393,9.802264],[-13.5106044,9.8024027],[-13.5100693,9.8038775],[-13.5098045,9.8049756],[-13.510923,9.8057077],[-13.5111563,9.807164],[-13.5103114,9.8072856],[-13.509775,9.8072275],[-13.5091929,9.8081789],[-13.5087504,9.8073913],[-13.5067709,9.8057315],[-13.5061111,9.8065878],[-13.5054915,9.8067808],[-13.505226,9.8068099],[-13.5049202,9.8066407],[-13.5049148,9.8063632],[-13.5048317,9.8060328],[-13.5045527,9.8052003],[-13.5033082,9.805972],[-13.5022621,9.805972],[-13.5019912,9.8056179],[-13.5013877,9.8058267],[-13.5010256,9.8070239],[-13.5003175,9.8074785],[-13.5018598,9.8070794],[-13.502246,9.8078301],[-13.5021951,9.8081287],[-13.501495,9.8092943],[-13.5014682,9.8100132],[-13.5017176,9.8105841],[-13.5014977,9.8109118],[-13.5008566,9.810444],[-13.5006018,9.810444],[-13.5001619,9.8105206],[-13.4996952,9.8109171],[-13.499081,9.8111391],[-13.4985633,9.8110519],[-13.4982147,9.811147],[-13.4975682,9.8118501],[-13.4970694,9.8120033],[-13.4961815,9.8119822],[-13.4947144,9.8128993],[-13.4944703,9.8128042],[-13.4941645,9.8124421],[-13.4941404,9.8120906],[-13.4940438,9.8119822],[-13.4937702,9.8119452],[-13.4931077,9.8121699],[-13.4925847,9.8128623],[-13.4922762,9.8128042],[-13.4922709,9.8118871],[-13.4916218,9.8118183],[-13.4916057,9.8126297],[-13.4914421,9.8131425],[-13.4915547,9.8133962],[-13.4914716,9.8135072],[-13.4910451,9.8134094],[-13.4909538,9.813682],[-13.4908869,9.8138825],[-13.49097,9.8144217],[-13.4913616,9.8146965],[-13.4918203,9.8143873],[-13.4927175,9.8143886],[-13.4930849,9.81476],[-13.4930769,9.8149621],[-13.492806,9.815307],[-13.4934122,9.8153626],[-13.4940774,9.815278],[-13.4947211,9.8147732],[-13.4954185,9.8146701],[-13.4956679,9.8140754],[-13.4960246,9.8137451],[-13.4970519,9.8135574],[-13.4971109,9.8138508],[-13.4967435,9.8145802],[-13.4968615,9.8155106],[-13.4972316,9.8156771],[-13.4975186,9.8159096],[-13.4979344,9.8159149],[-13.4980792,9.8162664],[-13.4980899,9.816692],[-13.4977868,9.8169272],[-13.4975589,9.8167448],[-13.4965164,9.8171415],[-13.495692,9.8169985],[-13.4956169,9.8166444],[-13.4951878,9.8163616],[-13.4948311,9.8164382],[-13.4943992,9.8170593],[-13.4938386,9.8170276],[-13.4936187,9.8171915],[-13.4937796,9.8173157],[-13.493042,9.8179817],[-13.491835,9.8186134],[-13.4914729,9.8198053],[-13.4908024,9.8200009],[-13.49073,9.8198635],[-13.490223,9.8197472],[-13.4902257,9.8192529],[-13.4901372,9.8189702],[-13.4898341,9.8189702],[-13.4895551,9.8194935],[-13.4896115,9.8201991],[-13.489468,9.8206947],[-13.4881953,9.8215285],[-13.48786,9.822217],[-13.4875569,9.8221086],[-13.4871948,9.8221681],[-13.4871653,9.822439],[-13.4881442,9.8240287],[-13.4884097,9.8240287],[-13.4885292,9.8227746],[-13.488831,9.8225064],[-13.4888605,9.8221364],[-13.4889986,9.8219685],[-13.4900393,9.8218734],[-13.4930541,9.8199124],[-13.4941913,9.8193045],[-13.4959884,9.818649],[-13.4970613,9.8186173],[-13.4980054,9.8191459],[-13.4980591,9.8198278],[-13.4985794,9.8196956],[-13.4992071,9.8197591],[-13.4998133,9.8201079],[-13.5000278,9.8200815],[-13.500178,9.8204779],[-13.5002746,9.8214822],[-13.4997328,9.8218417],[-13.4994377,9.8225975],[-13.5008379,9.8229253],[-13.500752,9.822328],[-13.5004784,9.8220425],[-13.500457,9.8177927],[-13.4999152,9.8172641],[-13.5001083,9.8163708],[-13.5007842,9.8159902],[-13.5013046,9.8146635],[-13.5021092,9.8138706],[-13.5026618,9.8136803],[-13.5044052,9.8135164],[-13.5044427,9.8137385],[-13.5048129,9.8137543],[-13.5052072,9.8130354],[-13.5056953,9.8129773],[-13.5056995,9.8129154],[-13.5058612,9.8128056],[-13.5062223,9.8123056],[-13.5066112,9.81225],[-13.5071112,9.81175],[-13.5074168,9.8116667],[-13.5078334,9.8112778],[-13.5084168,9.8111389],[-13.5089445,9.8108889],[-13.509139,9.8105833],[-13.5094723,9.8102222],[-13.5099723,9.8101944],[-13.5107779,9.8095833],[-13.5110834,9.8095278],[-13.511139,9.8102778],[-13.5110557,9.8104167],[-13.5104168,9.8106389],[-13.510389,9.8108056],[-13.5111668,9.8113056],[-13.5113334,9.812],[-13.5115834,9.8123889],[-13.5118334,9.8123333],[-13.5124168,9.8120278],[-13.5127501,9.8118056],[-13.5132501,9.8118333],[-13.5132501,9.8120556],[-13.5128334,9.8124444],[-13.5127501,9.8126667],[-13.513139,9.8124722],[-13.5132501,9.8126667],[-13.5138334,9.8127222],[-13.5138334,9.8149167],[-13.5139723,9.8153333],[-13.5136945,9.8154167],[-13.5132501,9.8156667],[-13.513639,9.8161944],[-13.5139445,9.8161944],[-13.5141668,9.8165833],[-13.5142223,9.8172222],[-13.5144168,9.8176389],[-13.514389,9.8181111],[-13.5145001,9.8186944],[-13.5143334,9.8191944],[-13.5130279,9.8196667],[-13.5130557,9.8201667],[-13.5125557,9.8202222],[-13.5122223,9.8219722],[-13.5117501,9.82325],[-13.5111945,9.8233611],[-13.5109723,9.8236667],[-13.5104445,9.8237778],[-13.510389,9.8240833],[-13.5100001,9.8248611],[-13.5098057,9.8250278],[-13.5098057,9.8253333],[-13.509889,9.8255833],[-13.509139,9.8255833],[-13.5094168,9.8273889],[-13.5088612,9.8273889],[-13.5090834,9.828],[-13.5096668,9.8281389],[-13.5096112,9.8276389],[-13.5104723,9.8275278],[-13.510889,9.8279722],[-13.5120001,9.828],[-13.5122223,9.8279722],[-13.5122501,9.8282222],[-13.5118057,9.8283889],[-13.5121112,9.8285556],[-13.5122779,9.8289444],[-13.5124445,9.8288333],[-13.5128612,9.8281111],[-13.5130279,9.8276389],[-13.513139,9.8274444],[-13.5135279,9.8275],[-13.5136112,9.8273889],[-13.5136112,9.8267778],[-13.5143612,9.8270278],[-13.5148612,9.8270833],[-13.5149445,9.8273611],[-13.5149723,9.8277778],[-13.5151668,9.8280556],[-13.5147779,9.8288611],[-13.5150834,9.83025],[-13.5154445,9.8305556],[-13.515639,9.8305556],[-13.5162223,9.8299444],[-13.5163334,9.8295556],[-13.5163057,9.8291667],[-13.5166668,9.8289167],[-13.5167501,9.82825],[-13.5171112,9.8281111],[-13.5174445,9.8275833],[-13.517889,9.8276667],[-13.5183334,9.8278889],[-13.5186668,9.8283056],[-13.5188334,9.8288889],[-13.5188057,9.8292222],[-13.5185834,9.8296389],[-13.5190279,9.8303889],[-13.5190834,9.8315],[-13.5190001,9.8319167],[-13.5193612,9.8319444],[-13.519389,9.8323333],[-13.5190834,9.8324444],[-13.518889,9.8323611],[-13.5188057,9.8320833],[-13.5185834,9.8321111],[-13.5180001,9.83225],[-13.5177501,9.8324722],[-13.5179445,9.8327778],[-13.5178334,9.833],[-13.517389,9.8330833],[-13.5171668,9.8333333],[-13.5172779,9.8338889],[-13.5167223,9.8340556],[-13.5168612,9.8350833],[-13.5170279,9.8352778],[-13.5170001,9.8355556],[-13.5165557,9.8358056],[-13.5165834,9.8358611],[-13.5169168,9.8361111],[-13.5167779,9.8364722],[-13.5166668,9.8365833],[-13.5165001,9.8366667],[-13.5163334,9.8368611],[-13.5161668,9.8369444],[-13.5155557,9.8370556],[-13.5154168,9.8369167],[-13.5153057,9.8368889],[-13.5151112,9.8369444],[-13.5148334,9.8368333],[-13.5144723,9.8368611],[-13.5136945,9.8372222],[-13.5130557,9.8366111],[-13.5122223,9.8369444],[-13.5121945,9.8370278],[-13.5120557,9.8377778],[-13.5120557,9.8398611],[-13.5115557,9.8410278],[-13.5115279,9.8424167],[-13.511389,9.8428611],[-13.510889,9.8428611],[-13.5108334,9.8433611],[-13.5102223,9.8436111],[-13.5095279,9.8443056],[-13.5093334,9.8443889],[-13.5085001,9.8445],[-13.5083057,9.8442778],[-13.5077779,9.8441389],[-13.5077501,9.8446389],[-13.5073334,9.8444444],[-13.5063057,9.84425],[-13.5056945,9.8439722],[-13.5049168,9.844],[-13.504389,9.8438333],[-13.504389,9.8443611],[-13.5032223,9.8447778],[-13.5022779,9.8448889],[-13.5022779,9.8443611],[-13.5020279,9.8443889],[-13.5020001,9.8448611],[-13.5018057,9.84475],[-13.5017779,9.84475],[-13.5005001,9.84475],[-13.5002223,9.8444444],[-13.4996945,9.8443889],[-13.4994168,9.8443611],[-13.4992779,9.8448056],[-13.4997362,9.84539],[-13.4998334,9.8456389],[-13.4999723,9.8461389],[-13.4994445,9.8462222],[-13.4994445,9.8469444],[-13.498639,9.8471667],[-13.4985279,9.8479444],[-13.4987223,9.8480556],[-13.4991945,9.8480278],[-13.499389,9.8478333],[-13.4997223,9.8478611],[-13.5004445,9.8485833],[-13.5010001,9.8487222],[-13.5010834,9.8481667],[-13.501389,9.8479167],[-13.501639,9.8473889],[-13.5019168,9.8471944],[-13.5018612,9.8469167],[-13.5018057,9.8466944],[-13.5024445,9.8468056],[-13.5027223,9.8469444],[-13.5029723,9.8475],[-13.5035001,9.848],[-13.5037223,9.8485278],[-13.5035834,9.8495],[-13.5039445,9.8493333],[-13.5048334,9.8493611],[-13.5050279,9.8493056],[-13.505139,9.8487222],[-13.505389,9.8488611],[-13.505639,9.8488889],[-13.5058612,9.8485833],[-13.5064445,9.8484722],[-13.5066112,9.8487778],[-13.5068334,9.8490833],[-13.5068057,9.8493333],[-13.5065557,9.84975],[-13.5065557,9.8505556],[-13.5069445,9.8509444],[-13.5066668,9.8513611],[-13.5063057,9.8515278],[-13.5062223,9.8517222],[-13.504889,9.8516111],[-13.5049168,9.8525833],[-13.5056668,9.8526389],[-13.5057501,9.8530278],[-13.5059168,9.8531389],[-13.505889,9.8536667],[-13.5057223,9.8537222],[-13.5055001,9.8541944],[-13.505389,9.8546389],[-13.5050834,9.8545556],[-13.5047779,9.8545833],[-13.5046112,9.8546667],[-13.5043334,9.8536389],[-13.5041668,9.8536944],[-13.5038612,9.8529722],[-13.5034445,9.8533333],[-13.5030557,9.854],[-13.5027779,9.8537222],[-13.5025279,9.8537222],[-13.5024445,9.8535],[-13.5019445,9.8528889],[-13.5011668,9.8532778],[-13.5007223,9.8541667],[-13.5009445,9.8546389],[-13.5005001,9.8546944],[-13.5005557,9.8549444],[-13.5005557,9.8559444],[-13.5002501,9.8562778],[-13.5001945,9.8569167],[-13.500389,9.8568056],[-13.5006945,9.8565556],[-13.5014723,9.8564722],[-13.5016112,9.8569722],[-13.5012268,9.8582051],[-13.5009445,9.8585278],[-13.5008057,9.85875],[-13.5007779,9.8589444],[-13.500813,9.859234],[-13.5003138,9.8607182],[-13.4999596,9.8607882],[-13.5000279,9.8608333],[-13.500139,9.8609722],[-13.4994948,9.8631337],[-13.4993334,9.8635833],[-13.4991417,9.8638863],[-13.4987501,9.8646944],[-13.4984132,9.8654246],[-13.4979239,9.8664749],[-13.4977223,9.8667778],[-13.4976668,9.8680556],[-13.4980834,9.8690278],[-13.4981945,9.8691389],[-13.4984168,9.8698611],[-13.4985557,9.8706944],[-13.4985557,9.8711389],[-13.4987223,9.8723333],[-13.498639,9.8732222],[-13.4978612,9.87475],[-13.4972223,9.87525],[-13.4969723,9.8756389],[-13.4968057,9.8756667],[-13.4962501,9.8761944],[-13.4962501,9.8762778],[-13.4957223,9.8766944],[-13.4952779,9.8765833],[-13.4917223,9.8785],[-13.4907779,9.8785556],[-13.4889445,9.8793056],[-13.4880557,9.8799167],[-13.4879445,9.8802222],[-13.4868057,9.8820833],[-13.4865279,9.8827778],[-13.4862501,9.8851944],[-13.486639,9.8856111],[-13.4869445,9.8866944],[-13.4869168,9.8878333],[-13.4861668,9.8884722],[-13.4839445,9.8886389],[-13.483139,9.8891944],[-13.482889,9.8898611],[-13.4817223,9.8914167],[-13.4800557,9.8930278],[-13.4790279,9.8935833],[-13.4778057,9.8956944],[-13.4772779,9.89675],[-13.4753057,9.8981667],[-13.4738334,9.8984722],[-13.4735279,9.8989167],[-13.4730834,9.8995],[-13.4725834,9.89975],[-13.4719723,9.8996667],[-13.4715712,9.8999975],[-13.4716112,9.9007222],[-13.4725834,9.9022778],[-13.4729445,9.9032222],[-13.4725557,9.9041111],[-13.4715279,9.9050833],[-13.4692779,9.9057222],[-13.4676945,9.9058333],[-13.4649445,9.908],[-13.4649445,9.9090278],[-13.4652223,9.9094167],[-13.464889,9.9099722],[-13.4640557,9.9104167],[-13.4635557,9.9103611],[-13.4628612,9.9098611],[-13.4618334,9.9075833],[-13.4615557,9.9073889],[-13.4610557,9.9074722],[-13.4575279,9.9104444],[-13.4560557,9.9113333],[-13.4557501,9.9123333],[-13.4548612,9.9130278],[-13.4525557,9.9133333],[-13.4515279,9.9119167],[-13.4507779,9.9114722],[-13.449139,9.9117778],[-13.4454168,9.9135556],[-13.4452501,9.9151111],[-13.444889,9.9153056],[-13.4411668,9.914],[-13.4392501,9.9133889],[-13.4390834,9.9125],[-13.4387223,9.9121111],[-13.4379445,9.9108333],[-13.437139,9.9076944],[-13.4360001,9.9060556],[-13.4357779,9.9052222],[-13.4353057,9.9044167],[-13.4353612,9.9036944],[-13.4351668,9.9033056],[-13.4346112,9.903],[-13.4345001,9.9015556],[-13.433389,9.8991667],[-13.4334168,9.8983611],[-13.4325557,9.8968056],[-13.4325834,9.8960556],[-13.4321668,9.8939444],[-13.4324168,9.8923056],[-13.4321668,9.8919167],[-13.4319168,9.8918333],[-13.4305279,9.8918056],[-13.4285001,9.8921111],[-13.4268057,9.8921667],[-13.4250001,9.8920278],[-13.4238612,9.8918333],[-13.4231112,9.8918056],[-13.4209445,9.8910556],[-13.4209168,9.8910278],[-13.4204723,9.8911389],[-13.4203334,9.8908889],[-13.4197501,9.8904722],[-13.4183057,9.8889167],[-13.4182779,9.8881111],[-13.4185834,9.887],[-13.418639,9.8865556],[-13.4192779,9.886],[-13.4196945,9.8851667],[-13.4166134,9.8846959],[-13.41671,9.8773289],[-13.4211303,9.8750881],[-13.4254168,9.8688889],[-13.4262223,9.8683611],[-13.4327779,9.8627778],[-13.4344723,9.8603611],[-13.4339168,9.8580278],[-13.431639,9.8553611],[-13.4295279,9.8542222],[-13.4270834,9.8544722],[-13.4253612,9.8552778],[-13.4248057,9.8561389],[-13.424639,9.8550278],[-13.4211668,9.8539722],[-13.4288334,9.8535833],[-13.4299445,9.85325],[-13.4313334,9.852],[-13.4323612,9.8534167],[-13.4398612,9.8533889],[-13.4411668,9.8526944],[-13.4408057,9.8513056],[-13.4395279,9.8495278],[-13.4355279,9.847],[-13.4347223,9.8465278],[-13.4345557,9.8459722],[-13.436639,9.8452778],[-13.4395279,9.8431944],[-13.4393612,9.8409444],[-13.4384445,9.8398889],[-13.4388334,9.8389722],[-13.4403334,9.8396389],[-13.441639,9.8401389],[-13.4422223,9.8423611],[-13.4443334,9.8417222],[-13.4457501,9.8392222],[-13.4473057,9.83875],[-13.4499168,9.8382778],[-13.4518334,9.8367778],[-13.4532223,9.832],[-13.4558057,9.8269167],[-13.4567223,9.8273056],[-13.4572381,9.827721],[-13.4573937,9.8277158],[-13.4577155,9.827462],[-13.4579516,9.8271766],[-13.4577638,9.8263256],[-13.4577155,9.8260085],[-13.4605001,9.8248889],[-13.4644491,9.8247702],[-13.465381,9.8247198],[-13.4682623,9.824796],[-13.4683779,9.8230518],[-13.4674016,9.8191086],[-13.4660283,9.8163494],[-13.466833,9.8144887],[-13.466833,9.8106829],[-13.4671548,9.8045405],[-13.4676108,9.8017706],[-13.4676323,9.7994817],[-13.4680024,9.79908],[-13.4682996,9.7984574],[-13.4684176,9.798119],[-13.4714405,9.7943447],[-13.4713117,9.7925051],[-13.4704212,9.7923359],[-13.4679536,9.7884135],[-13.4668485,9.7810548],[-13.4669734,9.7802803],[-13.4681211,9.7731674],[-13.467118,9.7720308],[-13.4652083,9.7703126],[-13.4529881,9.7613094],[-13.4517382,9.7608098],[-13.4505339,9.7606168],[-13.4494798,9.7602547],[-13.4478115,9.7601727],[-13.4462236,9.7596335],[-13.4409155,9.7568315],[-13.4386142,9.7541088],[-13.4335475,9.7492025],[-13.4336977,9.748658],[-13.4338962,9.7470058],[-13.4344433,9.7454197],[-13.4345667,9.744854],[-13.4345828,9.744505],[-13.4345104,9.744008],[-13.4343602,9.7435058],[-13.4333034,9.7412746],[-13.4331103,9.7407036],[-13.4330459,9.740011],[-13.4331586,9.7393184],[-13.4335019,9.7386258],[-13.4339203,9.738142],[-13.4372623,9.7356571],[-13.4381153,9.7351759],[-13.4392738,9.7346815],[-13.4406471,9.7343114],[-13.4415161,9.7342109],[-13.442353,9.7341739],[-13.4450727,9.7343484],[-13.4506786,9.7346498],[-13.4567606,9.7344959],[-13.463698,9.7342691],[-13.4663373,9.7343537],[-13.4713235,9.7351071],[-13.4719512,9.7351309],[-13.4724474,9.7350648],[-13.4731716,9.7348613],[-13.473826,9.734507],[-13.4798617,9.7305885],[-13.4854568,9.7269297],[-13.4882731,9.725095],[-13.4892521,9.7243284],[-13.4964431,9.7175843],[-13.4971995,9.7168044],[-13.4979666,9.7159161],[-13.5015259,9.7110648],[-13.5019597,9.7105876],[-13.5023808,9.7102248],[-13.5029857,9.7098031],[-13.5034886,9.7095361],[-13.5040411,9.7093061],[-13.50672,9.7084158],[-13.5080235,9.7079742],[-13.5088389,9.7076147],[-13.5097294,9.7070595],[-13.5105502,9.7062188],[-13.5111081,9.7054309],[-13.5135945,9.6997122],[-13.5159736,9.6942579],[-13.517017,9.6918176],[-13.5172342,9.6911593],[-13.5173871,9.690448],[-13.5174354,9.689869],[-13.5176982,9.6898373],[-13.5179396,9.6899007],[-13.5182916,9.6900856],[-13.5187255,9.6894248],[-13.5200452,9.6869977],[-13.520882,9.6854589],[-13.522207,9.6833543],[-13.5232558,9.6813395],[-13.5242589,9.6797954],[-13.5246076,9.6794041],[-13.5263403,9.678402],[-13.5282206,9.6776538],[-13.5287892,9.6775586],[-13.529626,9.677474],[-13.5305407,9.6773947],[-13.5317745,9.6773576],[-13.5319761,9.6772574],[-13.5320959,9.6772844],[-13.5328432,9.6772394],[-13.5333851,9.6773262],[-13.5337254,9.6773137],[-13.5339568,9.6773608],[-13.534208,9.6773356],[-13.5347109,9.6772607],[-13.5359276,9.6768354],[-13.5364238,9.676765],[-13.5368242,9.6765716],[-13.5372712,9.6764708],[-13.5381633,9.6761028],[-13.5384174,9.6760753],[-13.5385218,9.6759225],[-13.5386649,9.6758855],[-13.5391668,9.6755833],[-13.5394445,9.6755278],[-13.5414168,9.6744722],[-13.5414777,9.6744445],[-13.5415703,9.6745748],[-13.5437062,9.6770281],[-13.5437036,9.677306],[-13.5460015,9.6810906],[-13.5461456,9.681752],[-13.546127,9.6819827],[-13.5460313,9.6822542],[-13.5458139,9.6825888],[-13.5459336,9.682946],[-13.5462898,9.6832971],[-13.5466314,9.6830823],[-13.5468597,9.6825753],[-13.5469893,9.6824085],[-13.5473647,9.6823553],[-13.5474664,9.6824437],[-13.5475411,9.6824308],[-13.5476121,9.6824729],[-13.5476313,9.6825285],[-13.5475161,9.6826823],[-13.5479846,9.6827729],[-13.5482565,9.6829822],[-13.5482255,9.6831326],[-13.5482982,9.6835002],[-13.5482379,9.6836292],[-13.5482328,9.6837741],[-13.5483982,9.6839811],[-13.548404,9.6841701],[-13.5487287,9.6843686],[-13.5490154,9.6846276],[-13.549376,9.6847305],[-13.5494884,9.6848157],[-13.5499102,9.6855366],[-13.5504594,9.6858903],[-13.5506605,9.6860879],[-13.5506804,9.6863103],[-13.5508661,9.686525],[-13.55092,9.686667],[-13.551026,9.6867412],[-13.551217,9.6866657],[-13.5515348,9.6867243],[-13.5517894,9.6868551],[-13.5520721,9.6868739],[-13.5523741,9.6867983],[-13.5527243,9.6868456],[-13.553866,9.6867027],[-13.5539544,9.6866016],[-13.5542063,9.6865952],[-13.554315,9.6864387],[-13.5545198,9.6862875],[-13.5548559,9.686266],[-13.5550989,9.6861806],[-13.5550877,9.6860339],[-13.55546,9.6858289],[-13.5557328,9.6859102],[-13.5557446,9.6859836],[-13.556013,9.6861275],[-13.5561048,9.6861312],[-13.5561669,9.686004],[-13.5564307,9.6859109],[-13.5567284,9.6859416],[-13.5568294,9.6863927],[-13.5565471,9.6865271],[-13.5564997,9.6867849],[-13.5565483,9.6869109],[-13.5566724,9.6869638],[-13.5567045,9.687077],[-13.5568077,9.6871336],[-13.5568867,9.6872513],[-13.5571248,9.6877534],[-13.5572719,9.6878387],[-13.5574011,9.6881233],[-13.557648,9.6885427],[-13.5577403,9.688614],[-13.5578885,9.6886508],[-13.5579957,9.6886133],[-13.5580623,9.6885452],[-13.5581356,9.6884693],[-13.5583582,9.6883952],[-13.5584995,9.6884287],[-13.558633,9.6883876],[-13.5590453,9.6884868],[-13.5591293,9.6885767],[-13.5591339,9.6886594],[-13.5593114,9.688966],[-13.5598743,9.6892902],[-13.5603064,9.6897675],[-13.5610486,9.6898325],[-13.5614673,9.6895319],[-13.5615882,9.6895137],[-13.5616848,9.6895379],[-13.561781,9.6897956],[-13.5619071,9.6898485],[-13.5621117,9.6897806],[-13.5623584,9.689574],[-13.5625402,9.6893838],[-13.56274,9.6890273],[-13.5628734,9.6890272],[-13.5630256,9.6891056],[-13.5630926,9.6892721],[-13.5633072,9.6893224],[-13.5636291,9.6892457],[-13.5640636,9.6893409],[-13.564254,9.6892219],[-13.5642916,9.6890659],[-13.5642808,9.68882],[-13.5643962,9.688701],[-13.5645544,9.6886455],[-13.5648267,9.6886183],[-13.5651364,9.6886519],[-13.5653776,9.6886932],[-13.56544,9.6887387],[-13.5655179,9.6888483],[-13.5656939,9.6890806],[-13.5658496,9.6894241],[-13.5658686,9.6896349]]]]}]}
