# Supplementary material
Source: ML conference proceedings conference paper supplement (https://proceedings.neurips.cc/paper_files/paper/2022/hash/9d3faa41886997cfc2128b930077fa49-Abstract.html)
Supplement: Supplementary file 1 [file 9d3faa41886997cfc2128b930077fa49-Supplemental-Conference.zip › code/ebola/map/geojson/faranah.geojson]

{"type":"GeometryCollection","geometries":[{"type":"MultiPolygon","coordinates":[[[[-11.5958675,10.9206688],[-11.5951512,10.9239846],[-11.5937618,10.9266126],[-11.5930864,10.9297879],[-11.5925879,10.9310727],[-11.5927376,10.9317447],[-11.5856714,10.9366512],[-11.5668855,10.9372134],[-11.5444349,10.963945],[-11.5410912,10.9737928],[-11.5344038,10.9789511],[-11.5296271,10.9770754],[-11.5186406,10.9625381],[-11.500489,10.9756686],[-11.4871142,10.9672276],[-11.4680072,10.9709792],[-11.4646635,10.9780132],[-11.471351,10.9892674],[-11.4541547,10.9991144],[-11.452244,11.0113055],[-11.4436459,11.0216207],[-11.4283604,11.0136499],[-11.4207176,11.0159943],[-11.4235837,11.0267781],[-11.4092535,11.0328731],[-11.3944456,11.0291224],[-11.3786824,11.0455317],[-11.3700843,11.0689719],[-11.3614862,11.0764724],[-11.3600532,11.1116284],[-11.3696066,11.1322513],[-11.370562,11.1467802],[-11.3825038,11.1622456],[-11.398267,11.1706809],[-11.4082981,11.1945797],[-11.4168962,11.2081684],[-11.4221506,11.2243333],[-11.4228672,11.2353437],[-11.4322749,11.241343],[-11.4300929,11.2454585],[-11.4300929,11.25268],[-11.4295726,11.2550785],[-11.4254632,11.2572865],[-11.4258412,11.2630968],[-11.4223119,11.2664118],[-11.4182614,11.2683116],[-11.4141115,11.2644112],[-11.4100124,11.2642437],[-11.4050519,11.2617274],[-11.3972453,11.2635582],[-11.3939719,11.2672754],[-11.3901683,11.2672754],[-11.3860484,11.269464],[-11.3825456,11.269464],[-11.3763167,11.2659005],[-11.3718675,11.2610335],[-11.3667173,11.259855],[-11.3626001,11.2553121],[-11.3578708,11.2544839],[-11.3523847,11.2561653],[-11.3499374,11.2559938],[-11.3453118,11.2543136],[-11.3430606,11.2544713],[-11.3430606,11.2568318],[-11.3461338,11.2608505],[-11.3475238,11.2640883],[-11.3475238,11.2669996],[-11.3469216,11.2686248],[-11.3451141,11.2693863],[-11.3408338,11.2678019],[-11.3347078,11.2651288],[-11.3331708,11.2652682],[-11.332398,11.2658617],[-11.3308764,11.2683533],[-11.3317331,11.2765863],[-11.3305169,11.2803347],[-11.3196948,11.2954959],[-11.3178219,11.2988351],[-11.3161033,11.3113064],[-11.3136504,11.3140552],[-11.309163,11.3155783],[-11.3042359,11.3180773],[-11.3018429,11.3236083],[-11.2990647,11.3266728],[-11.2952914,11.3285227],[-11.2932836,11.3309835],[-11.294315,11.3409267],[-11.2925356,11.3424969],[-11.2878984,11.3448544],[-11.2827487,11.3490619],[-11.2784242,11.3512667],[-11.2688131,11.3526128],[-11.2658085,11.3542494],[-11.2656439,11.3569929],[-11.2704504,11.3635566],[-11.2699276,11.3721012],[-11.2676733,11.3729512],[-11.2627087,11.3867128],[-11.2606112,11.3894545],[-11.2552734,11.3911425],[-11.2533857,11.3926565],[-11.24672,11.3948347],[-11.2453589,11.3975032],[-11.2412335,11.4008731],[-11.2400343,11.4027204],[-11.2364345,11.4060812],[-11.2341945,11.4104727],[-11.2297062,11.4128417],[-11.2243581,11.4172385],[-11.2210167,11.4172385],[-11.2169145,11.415228],[-11.2139225,11.4160426],[-11.2120352,11.4189017],[-11.2028695,11.4216139],[-11.1977148,11.4214455],[-11.1908454,11.4229605],[-11.184187,11.4224585],[-11.1812014,11.4250598],[-11.1835908,11.4334238],[-11.1827196,11.4378637],[-11.179929,11.4409408],[-11.1762478,11.4424871],[-11.1707754,11.4404757],[-11.1682753,11.442436],[-11.1625729,11.4507349],[-11.1553261,11.4493821],[-11.1466383,11.4543908],[-11.1438999,11.4580811],[-11.1402468,11.4613203],[-11.1362204,11.4613203],[-11.1318379,11.4595031],[-11.1262487,11.4684667],[-11.1252234,11.4786824],[-11.1264259,11.48609],[-11.1253842,11.4915349],[-11.1227458,11.4941205],[-11.1207051,11.4942871],[-11.119741,11.4958617],[-11.1207681,11.4990489],[-11.1193668,11.5021387],[-11.1149242,11.5073292],[-11.1150958,11.5127115],[-11.110077,11.5186487],[-11.108805,11.5195149],[-11.1093976,11.52048],[-11.1098214,11.5216577],[-11.1099533,11.5231612],[-11.1097579,11.5241251],[-11.1080583,11.5289213],[-11.1075783,11.530071],[-11.1075721,11.530771],[-11.1078954,11.5312605],[-11.1088798,11.5315124],[-11.1104254,11.5311915],[-11.1123188,11.5299896],[-11.1131818,11.5291376],[-11.1137803,11.5279438],[-11.1144765,11.5279759],[-11.1155625,11.5285989],[-11.1160244,11.5292885],[-11.1161103,11.53006],[-11.1160208,11.5324672],[-11.1157249,11.5331106],[-11.1151677,11.5337825],[-11.1137154,11.5345261],[-11.1137258,11.5346618],[-11.1142684,11.5352484],[-11.1148019,11.5355098],[-11.1154429,11.5355164],[-11.1158957,11.5356622],[-11.1164323,11.5353077],[-11.1173553,11.5343242],[-11.1184612,11.5333565],[-11.1195912,11.5330411],[-11.1212246,11.5333168],[-11.1225752,11.5333304],[-11.123174,11.533714],[-11.1233977,11.5343221],[-11.1238669,11.5353598],[-11.1243878,11.5361915],[-11.1245992,11.5362697],[-11.1248405,11.5361641],[-11.1251967,11.535755],[-11.1256888,11.534204],[-11.125971,11.532973],[-11.1262093,11.5310452],[-11.1265973,11.5299523],[-11.1272216,11.5288172],[-11.1279706,11.5280697],[-11.1292089,11.5269995],[-11.1300425,11.5268483],[-11.1316737,11.5282878],[-11.1320949,11.529037],[-11.1337937,11.5293334],[-11.1345935,11.5291244],[-11.1357217,11.5290835],[-11.1381867,11.5295288],[-11.1394545,11.5302523],[-11.1398548,11.5306264],[-11.1418126,11.5301827],[-11.1434257,11.5306431],[-11.1442241,11.5311717],[-11.1446763,11.5320381],[-11.1454068,11.5324566],[-11.1465805,11.5323618],[-11.1483168,11.5317137],[-11.1492619,11.5320314],[-11.150443,11.5318793],[-11.1511712,11.5320595],[-11.1519662,11.5327643],[-11.1518501,11.5332404],[-11.1520249,11.5336082],[-11.1520645,11.5345275],[-11.1525606,11.5350196],[-11.1535499,11.5354625],[-11.1557719,11.5359507],[-11.1578157,11.5363228],[-11.1581607,11.5366447],[-11.1584122,11.5380302],[-11.1589558,11.538589],[-11.1593557,11.5398842],[-11.1595073,11.5400374],[-11.1600194,11.5400032],[-11.1616587,11.5392959],[-11.1625702,11.5391075],[-11.1636697,11.5393769],[-11.1643662,11.5393832],[-11.165124,11.5392387],[-11.1674239,11.5389672],[-11.1677608,11.5391549],[-11.1682,11.5390419],[-11.1688309,11.5380554],[-11.1689933,11.5372993],[-11.1693495,11.5367151],[-11.1703401,11.5365838],[-11.1710077,11.5367455],[-11.1719015,11.5377148],[-11.1731506,11.5381674],[-11.1736554,11.5381674],[-11.1748509,11.5382789],[-11.1752109,11.5375415],[-11.1760677,11.5373334],[-11.1778099,11.5376928],[-11.1790634,11.5388738],[-11.1797441,11.5393247],[-11.1810503,11.5395861],[-11.1813608,11.5398709],[-11.18203,11.5399024],[-11.1830588,11.5401478],[-11.1838143,11.5401604],[-11.184784,11.5398371],[-11.1866911,11.5396673],[-11.187283,11.5398485],[-11.1882109,11.5387677],[-11.1886413,11.5385244],[-11.1891791,11.538749],[-11.189332,11.5394309],[-11.1893671,11.5404698],[-11.1886206,11.5426376],[-11.1886271,11.5436521],[-11.1888908,11.5448445],[-11.1889314,11.5454743],[-11.1891008,11.5461647],[-11.1891853,11.5473053],[-11.1902246,11.5480651],[-11.1917457,11.5484512],[-11.1926673,11.550035],[-11.1929273,11.5517107],[-11.1933111,11.5529489],[-11.1938738,11.5536862],[-11.1947229,11.5544845],[-11.195057,11.5551199],[-11.1962886,11.5556352],[-11.1975467,11.5556083],[-11.1980338,11.5559642],[-11.1980589,11.5564887],[-11.1972452,11.5578891],[-11.1961255,11.5586569],[-11.1954283,11.5589674],[-11.194282,11.559178],[-11.1940724,11.5595671],[-11.1941552,11.5605408],[-11.1947763,11.5617642],[-11.1953776,11.5619468],[-11.196207,11.561905],[-11.1968513,11.5608899],[-11.197193,11.5596045],[-11.1976943,11.5590277],[-11.1982708,11.5591772],[-11.1999381,11.5607971],[-11.2014101,11.5628052],[-11.2022674,11.5631997],[-11.2034637,11.5636054],[-11.2046792,11.5634194],[-11.2047392,11.56334],[-11.2046119,11.5630108],[-11.2029969,11.5620773],[-11.2027084,11.5614973],[-11.2027012,11.5605465],[-11.2030069,11.55994],[-11.2041059,11.5594304],[-11.2055257,11.55971],[-11.2058606,11.5603138],[-11.2061496,11.5603405],[-11.20625,11.5604892],[-11.2061248,11.561203],[-11.2058664,11.5618675],[-11.2062083,11.5626211],[-11.2072835,11.5630506],[-11.2074359,11.5636265],[-11.2081683,11.5647986],[-11.2081142,11.5651168],[-11.2074653,11.5656984],[-11.2071952,11.5662999],[-11.2074006,11.5668534],[-11.2074574,11.5672511],[-11.207017,11.5677034],[-11.2068357,11.5682661],[-11.2071261,11.5688293],[-11.2080055,11.5697644],[-11.2073978,11.570111],[-11.2073674,11.5704539],[-11.207855,11.5708617],[-11.2090796,11.5710766],[-11.2091386,11.5714931],[-11.2080111,11.5718097],[-11.207634,11.5722377],[-11.207634,11.5724551],[-11.2082474,11.5727846],[-11.2084383,11.5734505],[-11.2082716,11.5740835],[-11.2082784,11.5750648],[-11.2078989,11.5761394],[-11.2073368,11.5814814],[-11.1893499,11.5890449],[-11.1684077,11.6012777],[-11.1571289,11.6177322],[-11.1441702,11.6283097],[-11.1494497,11.6386517],[-11.1633682,11.6457028],[-11.1648081,11.6541639],[-11.1451301,11.6811908],[-11.1352912,11.6880059],[-11.1204127,11.6917658],[-11.0997749,11.6915308],[-11.0870562,11.70845],[-11.079137,11.7279528],[-11.0709779,11.7498037],[-11.0764973,11.7857482],[-11.0714578,11.8090039],[-11.0767373,11.8522213],[-11.0726577,11.867017],[-11.05082,11.8792287],[-11.0532198,11.8867434],[-11.0726334,11.8904804],[-11.0732691,11.8906028],[-11.0737276,11.8906911],[-11.0752177,11.8909779],[-11.0766841,11.8912602],[-11.0824967,11.8923792],[-11.1028946,11.9182086],[-11.1204127,11.917739],[-11.1292918,11.9144518],[-11.1470499,11.9245482],[-11.1612085,11.9376965],[-11.1537692,11.9585915],[-11.1520894,11.9874663],[-11.1537692,12.0102353],[-11.1645681,12.0259612],[-11.1705141,12.033309],[-11.1688041,12.033737],[-11.1673791,12.034236],[-11.1649571,12.035304],[-11.1628911,12.037442],[-11.1616801,12.038867],[-11.1607531,12.040648],[-11.1603261,12.042144],[-11.1598981,12.043355],[-11.1594001,12.044352],[-11.1585451,12.045421],[-11.1576901,12.046347],[-11.1569061,12.046419],[-11.1557661,12.046062],[-11.1545551,12.045421],[-11.1524181,12.045136],[-11.1514911,12.045492],[-11.1500671,12.046846],[-11.1480001,12.049126],[-11.1474301,12.049553],[-11.1467181,12.05048],[-11.1434401,12.055752],[-11.1416591,12.059457],[-11.1378121,12.066296],[-11.1383101,12.067508],[-11.1393081,12.068434],[-11.1406611,12.069146],[-11.1420861,12.070642],[-11.1426561,12.071711],[-11.1429411,12.073279],[-11.1430131,12.07563],[-11.1427991,12.077838],[-11.1429411,12.079192],[-11.1440811,12.081187],[-11.1452211,12.082897],[-11.1457201,12.084108],[-11.1457911,12.085889],[-11.1442241,12.088739],[-11.1437961,12.090021],[-11.1438681,12.091589],[-11.1445091,12.092444],[-11.1451501,12.092942],[-11.1444371,12.094011],[-11.1429411,12.096718],[-11.1426561,12.098571],[-11.1421581,12.100352],[-11.1412311,12.101563],[-11.1399491,12.102276],[-11.1384531,12.102489],[-11.1370991,12.103202],[-11.1355321,12.103701],[-11.1335371,12.103701],[-11.1312571,12.102632],[-11.1289061,12.102774],[-11.1269111,12.103059],[-11.1251301,12.102703],[-11.1239191,12.102917],[-11.1228501,12.103914],[-11.1219951,12.104057],[-11.1211401,12.103416],[-11.1201431,12.101777],[-11.1182191,12.100209],[-11.1171501,12.09964],[-11.1165801,12.099141],[-11.1152981,12.098785],[-11.1135881,12.099426],[-11.1112371,12.100779],[-11.1091711,12.102276],[-11.1074611,12.103914],[-11.1067481,12.105197],[-11.1066061,12.106479],[-11.1066061,12.108831],[-11.1066771,12.109971],[-11.1078171,12.111396],[-11.1091711,12.113319],[-11.1097411,12.114459],[-11.1103111,12.115741],[-11.1105961,12.116525],[-11.1105961,12.117665],[-11.1099541,12.118449],[-11.1081021,12.119446],[-11.1066771,12.120159],[-11.1046111,12.122794],[-11.1038981,12.124006],[-11.1038271,12.125787],[-11.1038271,12.127354],[-11.1020461,12.128423],[-11.1010491,12.130845],[-11.0994811,12.132128],[-11.0977711,12.13284],[-11.0953491,12.133553],[-11.0937821,12.133553],[-11.0928551,12.133909],[-11.0909321,12.133624],[-11.0892221,12.133197],[-11.0876541,12.132413],[-11.0856601,12.132627],[-11.0844481,12.13341],[-11.0841631,12.134265],[-11.0845201,12.135548],[-11.0846621,12.136545],[-11.0842351,12.1374],[-11.0835221,12.138113],[-11.0818121,12.137471],[-11.0804591,12.136616],[-11.0786771,12.13569],[-11.0772531,12.135405],[-11.0754711,12.135405],[-11.0741891,12.135975],[-11.0736191,12.137044],[-11.0736901,12.138113],[-11.0741891,12.139181],[-11.0740461,12.14025],[-11.0731201,12.140963],[-11.0719091,12.140464],[-11.0712681,12.14025],[-11.0698431,12.140108],[-11.0689881,12.140321],[-11.0677771,12.141176],[-11.0672781,12.142316],[-11.0672071,12.143171],[-11.0676341,12.144311],[-11.0682751,12.145237],[-11.0691301,12.145807],[-11.0699851,12.146306],[-11.0705551,12.147161],[-11.0711251,12.147873],[-11.0711961,12.148871],[-11.0706261,12.150367],[-11.0706981,12.151792],[-11.0708401,12.153003],[-11.0704841,12.154143],[-11.0708401,12.154998],[-11.0714101,12.155497],[-11.0713391,12.156565],[-11.0706981,12.15799],[-11.0701281,12.158703],[-11.070057,12.160056],[-11.0697,12.161268],[-11.068632,12.163619],[-11.0690591,12.164759],[-11.0680621,12.165685],[-11.0656391,12.167395],[-11.0650691,12.167965],[-11.0640721,12.16825],[-11.0629321,12.169247],[-11.0617921,12.170601],[-11.0610081,12.171171],[-11.0605101,12.170957],[-11.0597971,12.169176],[-11.0589421,12.167822],[-11.0581581,12.167395],[-11.0576601,12.166611],[-11.0574461,12.165471],[-11.0571611,12.164901],[-11.0562351,12.164759],[-11.0553091,12.165257],[-11.0548101,12.166326],[-11.0546671,12.167466],[-11.0549521,12.168748],[-11.0557361,12.170886],[-11.0568761,12.173379],[-11.0570901,12.174306],[-11.0569471,12.176015],[-11.0574461,12.177512],[-11.058728,12.179293],[-11.059726,12.181359],[-11.060581,12.182428],[-11.06165,12.184137],[-11.061436,12.185206],[-11.060153,12.186132],[-11.059156,12.187201],[-11.057802,12.188768],[-11.056092,12.191048],[-11.052388,12.195466],[-11.0519601,12.197104],[-11.0521741,12.197817],[-11.0530291,12.198672],[-11.0540971,12.199384],[-11.0544541,12.200097],[-11.0551661,12.201735],[-11.0553091,12.202377],[-11.0548811,12.203303],[-11.0519601,12.205155],[-11.0511761,12.206438],[-11.0498231,12.209003],[-11.0496801,12.210071],[-11.0491811,12.21171],[-11.0484691,12.213135],[-11.0482551,12.214132],[-11.0481841,12.215842],[-11.0476141,12.216769],[-11.0472581,12.217481],[-11.0473291,12.219048],[-11.0478991,12.220545],[-11.0474721,12.221613],[-11.0460471,12.221685],[-11.0451201,12.221613],[-11.0439091,12.222183],[-11.040677,12.2210457],[-11.0393801,12.2219446],[-11.037811,12.2242452],[-11.0366899,12.2250924],[-11.0364658,12.2250108],[-11.036172,12.2246453],[-11.0361849,12.2242423],[-11.0364824,12.2237072],[-11.0364377,12.2235672],[-11.0343395,12.2216279],[-11.0337663,12.2208206],[-11.0331056,12.2193655],[-11.0326284,12.2172148],[-11.0323818,12.2136916],[-11.0320599,12.2122865],[-11.0317701,12.2121081],[-11.0312122,12.2119246],[-11.0307455,12.2118984],[-11.0303057,12.2120663],[-11.029206,12.2129838],[-11.0283531,12.2139433],[-11.0271783,12.2148188],[-11.0260034,12.216001],[-11.0257512,12.2166407],[-11.0255447,12.2168006],[-11.025121,12.2169737],[-11.0242681,12.2169213],[-11.0226023,12.2165463],[-11.02172,12.2164599],[-11.0196948,12.2169054],[-11.0187132,12.2170235],[-11.0170556,12.2173722],[-11.0161951,12.217267],[-11.0137886,12.2175515],[-11.0128649,12.2170154],[-11.0109117,12.2156464],[-11.0077087,12.2139744],[-11.0044412,12.2146757],[-11.0005921,12.214132],[-10.9886131,12.214433],[-10.9868151,12.214808],[-10.9853171,12.215407],[-10.9842681,12.216306],[-10.9838181,12.217205],[-10.9835181,12.218404],[-10.9833681,12.220352],[-10.9830691,12.222375],[-10.9824691,12.223424],[-10.9814951,12.224323],[-10.9789481,12.225072],[-10.9774491,12.225297],[-10.9764751,12.225747],[-10.973778,12.229043],[-10.973178,12.229268],[-10.972429,12.229193],[-10.971829,12.228519],[-10.97078,12.227695],[-10.9662851,12.226871],[-10.9614141,12.226571],[-10.9596161,12.226046],[-10.9581181,12.225672],[-10.9557951,12.225597],[-10.9544461,12.225747],[-10.9533231,12.226196],[-10.9523491,12.227095],[-10.951225,12.22777],[-10.949352,12.227994],[-10.947703,12.22777],[-10.9469541,12.22747],[-10.9469541,12.226571],[-10.9472541,12.225072],[-10.9473291,12.224473],[-10.9468791,12.224323],[-10.9457551,12.224323],[-10.9444061,12.224473],[-10.9436571,12.224923],[-10.9432821,12.225447],[-10.9428331,12.226271],[-10.942383,12.22762],[-10.942009,12.22777],[-10.9415591,12.227395],[-10.9402101,12.226646],[-10.9396861,12.226571],[-10.9390121,12.226571],[-10.9385621,12.22702],[-10.938038,12.227695],[-10.937738,12.228294],[-10.937588,12.229493],[-10.937213,12.230467],[-10.936614,12.231366],[-10.935715,12.231741],[-10.934141,12.231666],[-10.933092,12.231291],[-10.931818,12.230317],[-10.929121,12.227545],[-10.9278471,12.226946],[-10.9266481,12.226571],[-10.9242511,12.226121],[-10.9231271,12.226196],[-10.9226021,12.226046],[-10.9224521,12.225747],[-10.9223781,12.224548],[-10.9220031,12.223124],[-10.9217031,12.2223],[-10.9206541,12.221251],[-10.9190061,12.220277],[-10.9175071,12.219753],[-10.9121121,12.219828],[-10.9117381,12.219528],[-10.9118131,12.218928],[-10.9132361,12.215931],[-10.9135361,12.215182],[-10.9133861,12.214583],[-10.9128621,12.213908],[-10.9118131,12.213759],[-10.9104641,12.213009],[-10.9100151,12.212485],[-10.9096401,12.211661],[-10.9097151,12.210762],[-10.9100891,12.209863],[-10.9106141,12.209038],[-10.9108075,12.208394],[-10.9108391,12.208289],[-10.9105391,12.207914],[-10.9097151,12.207765],[-10.9085161,12.208214],[-10.9063431,12.209263],[-10.9053691,12.209113],[-10.9049191,12.208589],[-10.9043951,12.208214],[-10.9037211,12.208214],[-10.9030461,12.208139],[-10.9031211,12.20754],[-10.9032711,12.20709],[-10.9032711,12.206341],[-10.9025221,12.206041],[-10.9016981,12.206041],[-10.9009481,12.206491],[-10.9004241,12.20739],[-10.8989251,12.209563],[-10.8981011,12.210162],[-10.8966781,12.210237],[-10.8956291,12.209863],[-10.8945801,12.208514],[-10.8945051,12.207765],[-10.8945801,12.207015],[-10.8948791,12.205517],[-10.8956291,12.203719],[-10.8955541,12.203119],[-10.8951791,12.202745],[-10.8938301,12.202445],[-10.8925571,12.20222],[-10.8921071,12.201846],[-10.8920321,12.201471],[-10.8919571,12.200722],[-10.8922571,12.199972],[-10.8927061,12.199373],[-10.8930061,12.198848],[-10.8930811,12.198249],[-10.8927811,12.19735],[-10.8926311,12.196601],[-10.893006,12.195177],[-10.893006,12.194578],[-10.892482,12.193903],[-10.891283,12.193304],[-10.8900091,12.19248],[-10.889335,12.191506],[-10.889035,12.189932],[-10.889036,12.188658],[-10.888511,12.187609],[-10.886488,12.185137],[-10.885214,12.184238],[-10.883716,12.183863],[-10.883191,12.183638],[-10.882892,12.183189],[-10.882742,12.181915],[-10.882742,12.180716],[-10.882592,12.180042],[-10.881918,12.179442],[-10.881168,12.178393],[-10.880644,12.178019],[-10.880569,12.177494],[-10.8806441,12.17652],[-10.8811681,12.175771],[-10.8818431,12.174197],[-10.8822921,12.173448],[-10.8822921,12.172699],[-10.8819921,12.172174],[-10.8819181,12.17135],[-10.8819921,12.170751],[-10.8819921,12.170001],[-10.8816931,12.169552],[-10.8803441,12.169027],[-10.8787711,12.169027],[-10.8780211,12.169103],[-10.8770471,12.168878],[-10.8767481,12.168203],[-10.8772721,12.16693],[-10.8777221,12.165581],[-10.8780211,12.165056],[-10.876298,12.163708],[-10.875624,12.162659],[-10.875024,12.16131],[-10.875174,12.160186],[-10.8745751,12.159512],[-10.8736751,12.159062],[-10.8719521,12.158088],[-10.8712031,12.157414],[-10.8704541,12.156889],[-10.8691051,12.15644],[-10.8684311,12.15584],[-10.8679811,12.155241],[-10.8673071,12.154791],[-10.8668571,12.154042],[-10.8661831,12.152619],[-10.8651341,12.151345],[-10.8638601,12.150371],[-10.8627361,12.149172],[-10.8604881,12.146549],[-10.8595141,12.145725],[-10.8591391,12.145051],[-10.8591391,12.142653],[-10.8586151,12.142428],[-10.8566671,12.142129],[-10.8545691,12.141305],[-10.8532201,12.14048],[-10.8524711,12.139656],[-10.8520211,12.138907],[-10.8509721,12.137708],[-10.8499981,12.136809],[-10.8487241,12.136359],[-10.8475261,12.136359],[-10.8467011,12.13606],[-10.8464771,12.135535],[-10.8463271,12.134336],[-10.8461771,12.133737],[-10.8456521,12.133138],[-10.8449781,12.132988],[-10.8440791,12.133063],[-10.8432551,12.132988],[-10.8425801,12.132538],[-10.8420561,12.131564],[-10.8410071,12.130365],[-10.8396581,12.13014],[-10.8378841,12.130446],[-10.8366191,12.130257],[-10.8361371,12.129466],[-10.8360621,12.128417],[-10.8354621,12.127667],[-10.8342631,12.127593],[-10.8317911,12.126768],[-10.8285691,12.12482],[-10.8269951,12.123771],[-10.8264711,12.123247],[-10.8258721,12.122348],[-10.8253471,12.12025],[-10.8249721,12.119426],[-10.8241481,12.119201],[-10.8229491,12.11965],[-10.8224251,12.12025],[-10.8212261,12.121374],[-10.8199521,12.121823],[-10.8187541,12.122048],[-10.8170301,12.122123],[-10.8157561,12.121748],[-10.8144831,12.121523],[-10.8133591,12.120924],[-10.8109611,12.120025],[-10.8071401,12.118676],[-10.8054171,12.118451],[-10.8043681,12.118526],[-10.8029441,12.118976],[-10.8012211,12.119201],[-10.7994221,12.119276],[-10.7980741,12.118976],[-10.7955271,12.118002],[-10.7932791,12.116579],[-10.7920801,12.11553],[-10.7916301,12.114181],[-10.7913311,12.112832],[-10.7911811,12.111259],[-10.7915551,12.109611],[-10.7921551,12.108037],[-10.7924551,12.106688],[-10.7924551,12.106089],[-10.7923051,12.105415],[-10.7917051,12.10459],[-10.7907311,12.103991],[-10.7898321,12.103167],[-10.7893831,12.102492],[-10.7893831,12.100544],[-10.7900571,12.099346],[-10.7904321,12.097847],[-10.7905061,12.096498],[-10.7900571,12.095299],[-10.7891581,12.094176],[-10.7882591,12.093426],[-10.7878841,12.092752],[-10.7884831,12.091104],[-10.7890081,12.089305],[-10.7894581,12.088106],[-10.7893831,12.087282],[-10.7887081,12.086682],[-10.7881091,12.086233],[-10.7879591,12.085783],[-10.7883341,12.085334],[-10.7883341,12.08451],[-10.7881091,12.08436],[-10.7876591,12.08421],[-10.7875091,12.083535],[-10.7878091,12.082486],[-10.7883341,12.081812],[-10.7889331,12.081138],[-10.7886331,12.080014],[-10.7880341,12.079564],[-10.7876591,12.07904],[-10.7878091,12.077991],[-10.7869851,12.075593],[-10.7862361,12.073196],[-10.7854111,12.071322],[-10.7851871,12.070723],[-10.7850371,12.070049],[-10.7852621,12.069749],[-10.7858611,12.070049],[-10.7861611,12.070273],[-10.7867601,12.070198],[-10.7871351,12.069749],[-10.7871351,12.068775],[-10.7876591,12.0684],[-10.7891581,12.067726],[-10.7897571,12.067501],[-10.7911811,12.067501],[-10.7920051,12.067576],[-10.7922301,12.067276],[-10.7925301,12.066677],[-10.7932041,12.066527],[-10.7942531,12.066677],[-10.7944781,12.066302],[-10.7943281,12.065628],[-10.7935041,12.064129],[-10.7928291,12.062555],[-10.7920801,12.059858],[-10.7921551,12.05821],[-10.7924551,12.056861],[-10.7929041,12.056112],[-10.7933541,12.054988],[-10.7935041,12.053414],[-10.7935781,12.051241],[-10.7944781,12.050192],[-10.7967251,12.049143],[-10.7985991,12.048769],[-10.7999471,12.048394],[-10.8003221,12.047945],[-10.8012211,12.046371],[-10.8015961,12.041576],[-10.8010711,12.040677],[-10.7996481,12.039703],[-10.7977741,12.03813],[-10.7961261,12.036856],[-10.7948521,12.035807],[-10.7941031,12.035133],[-10.7939531,12.034383],[-10.7941031,12.033409],[-10.7938031,12.032285],[-10.7926041,12.031461],[-10.7922301,12.030937],[-10.7914061,12.029063],[-10.7906561,12.028614],[-10.7890081,12.027865],[-10.7880341,12.02719],[-10.7874341,12.026066],[-10.7866101,12.023893],[-10.7858611,12.020747],[-10.7846621,12.01745],[-10.7836881,12.016551],[-10.7815151,12.015352],[-10.7795671,12.014003],[-10.7788181,12.013254],[-10.7782931,12.012205],[-10.7782181,12.011081],[-10.7785181,12.009808],[-10.7801671,12.00771],[-10.7806911,12.006885],[-10.7808411,12.005687],[-10.7798671,12.003963],[-10.7797921,12.002764],[-10.7803161,12.001341],[-10.7806161,12.000891],[-10.7805521,12.000057],[-10.7799601,11.999627],[-10.7789371,11.998765],[-10.7782911,11.997958],[-10.7778601,11.997204],[-10.7776981,11.994942],[-10.7762981,11.994134],[-10.7757601,11.993758],[-10.7753831,11.992896],[-10.7752221,11.991658],[-10.7747911,11.991011],[-10.7743061,11.990581],[-10.7733371,11.99015],[-10.7727451,11.989558],[-10.7728521,11.987404],[-10.7727451,11.98665],[-10.7717751,11.985788],[-10.7706451,11.985142],[-10.7701061,11.984657],[-10.7698911,11.982881],[-10.7693521,11.979919],[-10.7689751,11.978842],[-10.7683291,11.977873],[-10.7670911,11.975019],[-10.7666601,11.973511],[-10.7649911,11.971627],[-10.7648831,11.970496],[-10.7650981,11.969688],[-10.7651521,11.968934],[-10.7643991,11.967696],[-10.7639681,11.966781],[-10.7639681,11.965596],[-10.7645061,11.963927],[-10.7645061,11.962581],[-10.7653681,11.961504],[-10.7666061,11.96075],[-10.7678981,11.960104],[-10.7685981,11.959027],[-10.7688681,11.957196],[-10.7689751,11.956119],[-10.7697291,11.955419],[-10.7702141,11.954773],[-10.7703221,11.953965],[-10.7705371,11.953319],[-10.7712911,11.952565],[-10.7717751,11.951919],[-10.7719371,11.950842],[-10.7719911,11.949927],[-10.7723681,11.949334],[-10.7731221,11.948742],[-10.7734981,11.947719],[-10.7736601,11.944865],[-10.7736061,11.942497],[-10.7732291,11.941797],[-10.7720451,11.940881],[-10.7709681,11.940343],[-10.7696221,11.940343],[-10.7681681,11.940989],[-10.7649911,11.94282],[-10.7640751,11.943089],[-10.7620831,11.94212],[-10.7606831,11.94212],[-10.7593371,11.942658],[-10.7582601,11.942981],[-10.7572371,11.943089],[-10.7561601,11.942766],[-10.7550831,11.941958],[-10.7544911,11.94142],[-10.7535221,11.941043],[-10.7522291,11.94115],[-10.7516371,11.940827],[-10.7509371,11.939804],[-10.7500751,11.939158],[-10.7489451,11.938835],[-10.7474371,11.938781],[-10.7467371,11.938458],[-10.7460911,11.937597],[-10.7451751,11.936143],[-10.7445291,11.935227],[-10.7438291,11.934904],[-10.7422681,11.934635],[-10.7418911,11.933989],[-10.7415141,11.932804],[-10.7412451,11.93232],[-10.7404371,11.931943],[-10.7397371,11.931351],[-10.7384981,11.929735],[-10.7380681,11.929251],[-10.7351061,11.929251],[-10.7345141,11.929143],[-10.7340291,11.928227],[-10.7340291,11.927258],[-10.7334911,11.926181],[-10.7328981,11.924781],[-10.7322521,11.923974],[-10.7298831,11.923489],[-10.7284831,11.923328],[-10.7279981,11.922842],[-10.7274601,11.921927],[-10.7258981,11.921119],[-10.7253061,11.920204],[-10.7251981,11.919504],[-10.7241751,11.919181],[-10.7218601,11.919396],[-10.7204061,11.918911],[-10.7188451,11.918804],[-10.7167981,11.918858],[-10.7136221,11.916596],[-10.7128681,11.916381],[-10.7123291,11.915681],[-10.7120061,11.914119],[-10.7116831,11.913365],[-10.7107681,11.912719],[-10.7094751,11.912127],[-10.7086681,11.911535],[-10.7082371,11.910512],[-10.7081831,11.909704],[-10.7080221,11.909273],[-10.7074291,11.908896],[-10.7061911,11.909004],[-10.7051141,11.909219],[-10.7039291,11.909165],[-10.7033371,11.908896],[-10.7028521,11.908412],[-10.7017221,11.907658],[-10.7009141,11.907388],[-10.7001061,11.907388],[-10.6991911,11.907765],[-10.6983291,11.908573],[-10.6973601,11.909058],[-10.6960681,11.909165],[-10.6950451,11.909327],[-10.6939141,11.909758],[-10.6934291,11.90965],[-10.6927291,11.909165],[-10.6923521,11.908573],[-10.6915451,11.90825],[-10.6906831,11.908088],[-10.6898221,11.907496],[-10.6894981,11.90685],[-10.6892831,11.90615],[-10.6890141,11.905612],[-10.6880451,11.905504],[-10.6874521,11.906096],[-10.6862141,11.90685],[-10.6851911,11.907173],[-10.6846521,11.906904],[-10.6840601,11.905504],[-10.6829831,11.903888],[-10.6817981,11.903512],[-10.6804521,11.903404],[-10.6791061,11.903135],[-10.6783521,11.902865],[-10.6767911,11.902704],[-10.6755521,11.902704],[-10.6745831,11.90265],[-10.6742061,11.902381],[-10.6739911,11.901519],[-10.6737751,11.901142],[-10.6731831,11.900873],[-10.6722681,11.900819],[-10.6697911,11.900927],[-10.6692521,11.901196],[-10.6685521,11.901681],[-10.6677451,11.901681],[-10.6668291,11.901573],[-10.6663451,11.90125],[-10.6657521,11.900981],[-10.6650521,11.900981],[-10.6644061,11.901142],[-10.6637601,11.901412],[-10.6627371,11.901196],[-10.6619291,11.900819],[-10.6607451,11.900442],[-10.6598831,11.900442],[-10.6571809,11.8977505],[-10.655726,11.8991384],[-10.6542735,11.90173],[-10.6528853,11.9027958],[-10.6518601,11.9042753],[-10.6511445,11.905895],[-10.6509203,11.9065324],[-10.6509844,11.9075878],[-10.6507815,11.9084865],[-10.650365,11.9088313],[-10.6496815,11.9088209],[-10.6492864,11.908476],[-10.649233,11.907661],[-10.6487951,11.9073057],[-10.6483253,11.906825],[-10.6480261,11.9061353],[-10.6476525,11.9057174],[-10.6471719,11.905477],[-10.6467874,11.9048083],[-10.6460506,11.9043276],[-10.6457301,11.9041081],[-10.6447691,11.9040872],[-10.6428041,11.9043067],[-10.6416507,11.9044007],[-10.6404759,11.904338],[-10.6389808,11.9046045],[-10.6368412,11.9050202],[-10.6353157,11.9054487],[-10.6341076,11.9061137],[-10.633277,11.9070152],[-10.6319025,11.9088624],[-10.6308605,11.9107539],[-10.630483,11.91201],[-10.6303017,11.9132365],[-10.6302261,11.9147734],[-10.6302262,11.9162511],[-10.630483,11.9175072],[-10.6310569,11.91931],[-10.6316761,11.9212458],[-10.6331107,11.9264472],[-10.6333223,11.9284273],[-10.633292,11.9298754],[-10.6330806,11.9313382],[-10.6326124,11.9323726],[-10.6319327,11.9331114],[-10.6306642,11.9338946],[-10.6279608,11.9351505],[-10.6263297,11.9356529],[-10.6249704,11.9360962],[-10.624019,11.9367907],[-10.6232336,11.9380467],[-10.622841,11.9393617],[-10.6220707,11.9407507],[-10.6217687,11.9423465],[-10.6213609,11.9439718],[-10.6211646,11.9453755],[-10.6208171,11.946794],[-10.6205454,11.9483158],[-10.6202456,11.9494098],[-10.6199866,11.9503548],[-10.6190351,11.9523495],[-10.6171774,11.9552307],[-10.6164072,11.9572253],[-10.6161807,11.9582448],[-10.6161052,11.9593825],[-10.6162108,11.9605349],[-10.6159844,11.9617612],[-10.6154407,11.9627511],[-10.6147006,11.9632535],[-10.6136282,11.9635342],[-10.6126618,11.9644059],[-10.6119518,11.9654992],[-10.6112572,11.9675676],[-10.610351,11.9688382],[-10.6102,11.9698281],[-10.6102452,11.9711873],[-10.6098225,11.9731375],[-10.6091428,11.9747331],[-10.6082215,11.975856],[-10.6069227,11.9766685],[-10.6025127,11.9785005],[-10.6005644,11.978988],[-10.5992506,11.9790176],[-10.5978762,11.9787517],[-10.5959129,11.9779539],[-10.5949311,11.9774516],[-10.5939797,11.9772152],[-10.5925752,11.9773186],[-10.5907476,11.9782493],[-10.5893734,11.9793574],[-10.5881954,11.9807166],[-10.5873646,11.9824746],[-10.58667,11.9838634],[-10.5855976,11.9849566],[-10.5838307,11.9857396],[-10.5816559,11.9861089],[-10.579617,11.986168],[-10.5774725,11.9860942],[-10.5751617,11.9863748],[-10.5736062,11.9869067],[-10.5712953,11.9876749],[-10.5686374,11.9888863],[-10.5673837,11.9897136],[-10.5665683,11.9906148],[-10.565934,11.9917228],[-10.5655111,11.9932001],[-10.5653147,11.9950615],[-10.5653902,11.9980456],[-10.5656621,11.9990354],[-10.5661303,12.0002911],[-10.5672781,12.0022558],[-10.5682144,12.0034819],[-10.5688035,12.0039546],[-10.5699362,12.004649],[-10.5722318,12.0055353],[-10.5739534,12.0065546],[-10.5752524,12.0079284],[-10.5771704,12.0110896],[-10.5792848,12.0141179],[-10.5802513,12.0156837],[-10.5807346,12.0168507],[-10.5810669,12.0185938],[-10.5812934,12.0200857],[-10.581535,12.0212822],[-10.5817012,12.0221537],[-10.58152,12.0232025],[-10.5809762,12.023941],[-10.5796019,12.024916],[-10.5781823,12.0253886],[-10.5769741,12.0255954],[-10.5756752,12.0258909],[-10.5745425,12.0264522],[-10.572851,12.0277668],[-10.5714012,12.0287565],[-10.5704195,12.0292439],[-10.5687279,12.0294802],[-10.5672932,12.0293473],[-10.5651638,12.0291701],[-10.5635327,12.028978],[-10.5609047,12.0282986],[-10.5591982,12.0283281],[-10.5576728,12.0286383],[-10.5551205,12.029628],[-10.5517827,12.0306324],[-10.5504084,12.0310312],[-10.5497892,12.03143],[-10.5471764,12.0323458],[-10.5456208,12.0326708],[-10.5445032,12.0331287],[-10.5415431,12.0339706],[-10.5403802,12.0343251],[-10.5378581,12.0351818],[-10.53594,12.0359203],[-10.5339465,12.0364964],[-10.5327987,12.0366589],[-10.532119,12.0365703],[-10.5316811,12.0360533],[-10.5312884,12.0347091],[-10.5310467,12.0336752],[-10.5306239,12.0333798],[-10.5301708,12.0334684],[-10.5296875,12.0343694],[-10.528736,12.0358022],[-10.5277997,12.036777],[-10.5270143,12.0372054],[-10.5263346,12.0376928],[-10.5259722,12.0385495],[-10.5259118,12.0392733],[-10.525353,12.0401004],[-10.524024,12.0411344],[-10.5226798,12.0433942],[-10.521547,12.0451962],[-10.519916,12.0466437],[-10.5191156,12.0475594],[-10.5187983,12.048549],[-10.5186776,12.0498783],[-10.5184964,12.0518132],[-10.5186021,12.053172],[-10.5190702,12.054708],[-10.5195687,12.0560521],[-10.5195385,12.0572484],[-10.5189796,12.0586663],[-10.5187984,12.0600841],[-10.5189797,12.0612952],[-10.5194176,12.062846],[-10.5199462,12.0654158],[-10.5203842,12.066937],[-10.5209882,12.0701714],[-10.5214716,12.0723277],[-10.5215169,12.0739079],[-10.5211998,12.0752223],[-10.5209128,12.07633],[-10.5209128,12.0779693],[-10.5211242,12.0794165],[-10.5210336,12.0809081],[-10.5203842,12.0829462],[-10.5197649,12.0846297],[-10.5195989,12.0853238],[-10.5191307,12.0856044],[-10.5184511,12.0852647],[-10.5175901,12.0844377],[-10.5169408,12.0841424],[-10.5163216,12.08429],[-10.5155061,12.0842162],[-10.5126365,12.0828428],[-10.5116549,12.082385],[-10.5110809,12.0823259],[-10.5108242,12.0829314],[-10.5105826,12.0838618],[-10.5098274,12.0851614],[-10.5085588,12.0879968],[-10.5084379,12.0890896],[-10.5080604,12.0903744],[-10.5079094,12.0921761],[-10.5079245,12.0929292],[-10.5073052,12.0952034],[-10.5071543,12.096311],[-10.5072449,12.0972118],[-10.5078339,12.0979354],[-10.5097971,12.0995007],[-10.5105826,12.0998994],[-10.5120022,12.1000175],[-10.5145092,12.1003424],[-10.5160799,12.100623],[-10.5168652,12.1011546],[-10.5172278,12.1019077],[-10.5173788,12.1035026],[-10.5171219,12.106072],[-10.5172731,12.1080951],[-10.517409,12.1116538],[-10.5180281,12.1173536],[-10.5180433,12.118786],[-10.5179206,12.1196209],[-10.5174261,12.1205243],[-10.5167801,12.120805],[-10.5159367,12.1206471],[-10.5151292,12.1205769],[-10.5147166,12.1208576],[-10.5145909,12.1215418],[-10.5146088,12.1230857],[-10.5144833,12.1242085],[-10.5139988,12.1254014],[-10.5134605,12.1257523],[-10.5128324,12.1259102],[-10.5110022,12.1258751],[-10.5089207,12.1258049],[-10.507987,12.1256933],[-10.5066675,12.1256685],[-10.5017444,12.1252219],[-10.4947344,12.1245118],[-10.492822,12.1242483],[-10.4918306,12.1241649],[-10.4896549,12.1240202],[-10.4879817,12.12395],[-10.487551,12.1238974],[-10.4871787,12.1237877],[-10.4868692,12.1236562],[-10.4866135,12.1236825],[-10.4863219,12.1237702],[-10.4860572,12.1237658],[-10.4857253,12.1237132],[-10.4852811,12.1237526],[-10.4846665,12.1236781],[-10.4838277,12.1235246],[-10.4827421,12.1233228],[-10.4818895,12.1233164],[-10.4808936,12.1234392],[-10.4800771,12.1236409],[-10.4791351,12.1236497],[-10.4780135,12.1235357],[-10.4760398,12.1234041],[-10.4752144,12.1234479],[-10.4747927,12.123255],[-10.4743441,12.1227111],[-10.4740301,12.1217988],[-10.4738776,12.1211059],[-10.4729534,12.1202638],[-10.4710245,12.1193339],[-10.470226,12.1191146],[-10.4697953,12.1192462],[-10.4695621,12.1195796],[-10.469275,12.1198953],[-10.4685124,12.1199918],[-10.4670229,12.1200708],[-10.466063,12.1200796],[-10.4646634,12.1206059],[-10.4636944,12.1206497],[-10.4624921,12.1204918],[-10.4597917,12.1208252],[-10.4583023,12.1207813],[-10.4555121,12.1204041],[-10.4528922,12.1200883],[-10.4518336,12.120141],[-10.4506942,12.1204041],[-10.4494829,12.1208603],[-10.4476437,12.1217901],[-10.446289,12.1227111],[-10.4451046,12.1237725],[-10.4442972,12.1248865],[-10.4439473,12.1255619],[-10.443723,12.1262286],[-10.4437498,12.1271058],[-10.4438396,12.1278075],[-10.4438576,12.1284303],[-10.4436871,12.128711],[-10.4429963,12.1291934],[-10.4417133,12.1300881],[-10.4403944,12.131474],[-10.438094,12.1336909],[-10.4332167,12.1385769],[-10.4320682,12.1394891],[-10.4308841,12.1401206],[-10.4294844,12.140682],[-10.4263981,12.1416293],[-10.4243165,12.1419275],[-10.422917,12.1420503],[-10.4212123,12.1420328],[-10.4178927,12.1416468],[-10.4153856,12.1415715],[-10.4134445,12.1420305],[-10.4117188,12.142998],[-10.4105769,12.1440152],[-10.4098409,12.1449579],[-10.4091939,12.1464092],[-10.4088513,12.147724],[-10.4086864,12.1489644],[-10.408737,12.1503909],[-10.4090543,12.1516809],[-10.4097776,12.1531445],[-10.4109195,12.154695],[-10.4125942,12.1565556],[-10.4134445,12.1579448],[-10.4140662,12.1593712],[-10.414561,12.1609165],[-10.4148274,12.1624793],[-10.4150432,12.1641165],[-10.4151447,12.1677383],[-10.4150811,12.1709879],[-10.4148402,12.1726127],[-10.4144594,12.1739026],[-10.4138251,12.175056],[-10.4127593,12.1761475],[-10.4108307,12.177611],[-10.4089655,12.1788637],[-10.40776,12.1794218],[-10.4071603,12.1796201],[-10.4054635,12.1798931],[-10.4034208,12.1803644],[-10.4006294,12.1814434],[-10.3977491,12.1821628],[-10.3961251,12.1823116],[-10.3949958,12.1821752],[-10.3939045,12.1817659],[-10.3930672,12.1810837],[-10.3913036,12.1796822],[-10.387992,12.1779087],[-10.3854543,12.1763707],[-10.3843251,12.1754529],[-10.3833354,12.1741878],[-10.3824852,12.1726003],[-10.3817747,12.1714096],[-10.3804298,12.169884],[-10.3794655,12.168991],[-10.3786661,12.1685693],[-10.378019,12.1683708],[-10.3776066,12.1683408],[-10.3766995,12.1684577],[-10.375659,12.1687553],[-10.3733878,12.1699708],[-10.3717511,12.1706282],[-10.3685917,12.1717197],[-10.365204,12.1726871],[-10.3632881,12.1732948],[-10.3614609,12.1742499],[-10.3599511,12.1753041],[-10.3591009,12.1761103],[-10.3586569,12.1768668],[-10.35853,12.1775614],[-10.3585046,12.1781071],[-10.3587457,12.1788265],[-10.3596972,12.1809349],[-10.3605474,12.1831177],[-10.3620573,12.1858835],[-10.3636305,12.1883143],[-10.3644934,12.1900506],[-10.3647852,12.1912288],[-10.3649502,12.192283],[-10.3648106,12.1929775],[-10.3645569,12.1935604],[-10.3635163,12.1945401],[-10.3611057,12.1964128],[-10.3591644,12.1975538],[-10.3572739,12.1982607],[-10.356043,12.1985707],[-10.3549012,12.1985459],[-10.3539876,12.1983227],[-10.3527822,12.1975166],[-10.3502826,12.196202],[-10.3467173,12.1946517],[-10.3432153,12.1935232],[-10.3403859,12.1926922],[-10.3383049,12.192345],[-10.3364399,12.1922706],[-10.3350187,12.1924318],[-10.3336611,12.1927418],[-10.3325192,12.1933991],[-10.3318466,12.1942177],[-10.3311616,12.1953338],[-10.3306414,12.1963756],[-10.33021,12.1976406],[-10.3300068,12.1987691],[-10.330045,12.1997117],[-10.3302861,12.200431],[-10.3308571,12.2012743],[-10.3316057,12.2020804],[-10.3322653,12.2028617],[-10.3334835,12.2048211],[-10.3361988,12.2081074],[-10.3394722,12.2125595],[-10.3407792,12.2148536],[-10.3415658,12.2165402],[-10.3418831,12.2177554],[-10.3422003,12.2194296],[-10.342213,12.2214633],[-10.3420479,12.2229265],[-10.3415786,12.2241914],[-10.3410457,12.2250842],[-10.3396393,12.2269298],[-10.339147,12.2263718],[-10.3389391,12.2260202],[-10.3386672,12.2257233],[-10.3381317,12.225403],[-10.3373323,12.2250124],[-10.3365328,12.2248639],[-10.3327996,12.2242936],[-10.3316245,12.2240826],[-10.3305531,12.2237857],[-10.3298737,12.2233873],[-10.3276353,12.2217778],[-10.3261405,12.2205746],[-10.3251891,12.2196371],[-10.324022,12.2181135],[-10.3236222,12.2177697],[-10.3231427,12.2174963],[-10.3224232,12.2172931],[-10.3216558,12.2172384],[-10.3212639,12.21734],[-10.3209763,12.21759],[-10.3207284,12.2179573],[-10.3206084,12.2185432],[-10.3206085,12.2195824],[-10.3207924,12.2209496],[-10.3211041,12.222981],[-10.3211201,12.2235748],[-10.3207843,12.2250905],[-10.3204965,12.2258015],[-10.3201289,12.2267078],[-10.3198251,12.2271687],[-10.3195773,12.2273328],[-10.3191856,12.2273484],[-10.3187619,12.2271531],[-10.3182981,12.2267468],[-10.3176827,12.2261218],[-10.3169552,12.2255983],[-10.3162756,12.2252311],[-10.3153484,12.2249811],[-10.3142452,12.224817],[-10.311767,12.2244186],[-10.3108477,12.2242076],[-10.3096405,12.2237232],[-10.308897,12.2233013],[-10.3081936,12.2226763],[-10.3076979,12.222145],[-10.3072343,12.2214184],[-10.3070185,12.2207934],[-10.3068745,12.2191448],[-10.3068666,12.2175822],[-10.3067866,12.2168322],[-10.3065868,12.2160509],[-10.306283,12.2154414],[-10.3057473,12.2145742],[-10.3033252,12.2118083],[-10.3021181,12.2103628],[-10.3013027,12.2091518],[-10.3007431,12.2079876],[-10.3005911,12.2075031],[-10.3005912,12.20705],[-10.300799,12.2062217],[-10.3010628,12.2048544],[-10.3010307,12.2043856],[-10.3008949,12.2040496],[-10.3005912,12.2038777],[-10.3001195,12.2038777],[-10.299496,12.2040496],[-10.2991522,12.2040652],[-10.2989204,12.2040262],[-10.2987925,12.2037683],[-10.2987525,12.2029166],[-10.2985765,12.2013461],[-10.2985766,12.2000491],[-10.2986646,12.1994552],[-10.2988563,12.1990411],[-10.2993361,12.1984551],[-10.2999596,12.1978613],[-10.3002714,12.1972362],[-10.3004232,12.1965564],[-10.3004073,12.1960094],[-10.3001755,12.1950796],[-10.2996238,12.1939935],[-10.2989204,12.1929777],[-10.2984486,12.1924229],[-10.298097,12.1921572],[-10.2977293,12.1920322],[-10.2971297,12.1920869],[-10.2962982,12.1923057],[-10.2949953,12.1928448],[-10.293948,12.1933762],[-10.292613,12.1942513],[-10.29131,12.1951343],[-10.2906783,12.1954156],[-10.2883441,12.1960407],[-10.2869106,12.1963449],[-10.2856728,12.1967704],[-10.2850284,12.1971129],[-10.2846269,12.19745],[-10.2843218,12.197798],[-10.28409,12.1982898],[-10.2840179,12.1989495],[-10.2840518,12.199701],[-10.284391,12.2011927],[-10.2855554,12.2042867],[-10.2858381,12.2058448],[-10.2861772,12.206784],[-10.2865728,12.2074249],[-10.2873303,12.2081431],[-10.2877035,12.2085741],[-10.2879183,12.2091044],[-10.2879296,12.209889],[-10.2875791,12.2110823],[-10.2867086,12.2126624],[-10.286132,12.2133586],[-10.2853972,12.2137121],[-10.2843005,12.2138116],[-10.282842,12.2135133],[-10.2812255,12.2129166],[-10.2794392,12.2123088],[-10.2782407,12.2120879],[-10.2774947,12.2120547],[-10.2766354,12.2121984],[-10.2752788,12.2127177],[-10.2728707,12.2138779],[-10.2717288,12.2141652],[-10.2702705,12.2141873],[-10.269106,12.2139552],[-10.2682241,12.2135906],[-10.2672293,12.2129276],[-10.2666414,12.212342],[-10.2658727,12.2108061],[-10.2651378,12.2091044],[-10.2648778,12.2082205],[-10.2647081,12.2075685],[-10.264369,12.207237],[-10.2639733,12.2071707],[-10.2630802,12.2076238],[-10.2624357,12.2082205],[-10.261701,12.2093917],[-10.2614749,12.2100768],[-10.2611357,12.2124746],[-10.2608756,12.2135574],[-10.2603782,12.2145409],[-10.2597789,12.215237],[-10.2585015,12.2159662],[-10.2573936,12.2164193],[-10.2561838,12.2164524],[-10.2550873,12.216353],[-10.2541714,12.2162314],[-10.2532219,12.2163309],[-10.252781,12.2167287],[-10.2523514,12.2170712],[-10.2503728,12.2178667],[-10.2496946,12.2179772],[-10.2489824,12.2178446],[-10.2483492,12.2175132],[-10.2479083,12.2170491],[-10.2474899,12.2158668],[-10.2470943,12.2152812],[-10.2463821,12.2148392],[-10.245342,12.2139663],[-10.2448219,12.2132812],[-10.2440419,12.2122536],[-10.2436801,12.2116569],[-10.2436688,12.2110381],[-10.2439175,12.2105188],[-10.2451045,12.2097011],[-10.2461108,12.2092039],[-10.2468004,12.2088061],[-10.2471735,12.2083973],[-10.2475353,12.2077785],[-10.2477613,12.2069718],[-10.2478066,12.2063862],[-10.2476709,12.2057453],[-10.2473656,12.2050823],[-10.2462012,12.20369],[-10.2453081,12.2023861],[-10.2445731,12.2015242],[-10.2440419,12.2010491],[-10.2432279,12.200585],[-10.2425438,12.2002921],[-10.2418204,12.2001485],[-10.2407859,12.2002756],[-10.2386152,12.2007618],[-10.2371795,12.2012259],[-10.2355967,12.2020988],[-10.2325782,12.203248],[-10.2316058,12.2036348],[-10.2305771,12.204342],[-10.2289943,12.2051597],[-10.2274793,12.2069497],[-10.2267333,12.207447],[-10.2256704,12.2083641],[-10.2247887,12.2087398],[-10.2239973,12.2089829],[-10.2230815,12.2089387],[-10.2222902,12.2088061],[-10.2216797,12.2084525],[-10.2208544,12.2078448],[-10.2201083,12.2073254],[-10.2186046,12.2066293],[-10.2155973,12.2054249],[-10.2136303,12.2046072],[-10.2112561,12.203458],[-10.21051,12.2029828],[-10.2097638,12.202795],[-10.207333,12.2026292],[-10.2056147,12.2027287],[-10.2049364,12.2028502],[-10.2042015,12.202795],[-10.2022231,12.2028281],[-10.2003576,12.2031375],[-10.1985714,12.203911],[-10.19726,12.2044193],[-10.1945467,12.2049276],[-10.1930091,12.2052923],[-10.1925004,12.2053144],[-10.1917542,12.2049939],[-10.190488,12.2044635],[-10.1898775,12.204132],[-10.1896401,12.2035795],[-10.1896966,12.2027508],[-10.1900809,12.2018999],[-10.1912568,12.2003861],[-10.191562,12.1997673],[-10.191674,12.1990328],[-10.1915779,12.1982202],[-10.1907945,12.1969387],[-10.1893397,12.1943446],[-10.1883644,12.1932975],[-10.1873411,12.1922505],[-10.1859341,12.1911721],[-10.1823368,12.1902032],[-10.1812655,12.1896406],[-10.1796507,12.1879372],[-10.1783717,12.1873277],[-10.1775883,12.1869526],[-10.1767728,12.1866713],[-10.1757017,12.1870464],[-10.1738788,12.1882205],[-10.1726536,12.1891476],[-10.1719659,12.1895367],[-10.1704853,12.1899561],[-10.1688331,12.1897883],[-10.1671819,12.1898397],[-10.1661519,12.1891686],[-10.1650565,12.188467],[-10.1637916,12.1874487],[-10.162075,12.1866307],[-10.1608293,12.1856774],[-10.1589196,12.1849643],[-10.1580184,12.1843561],[-10.1572255,12.1837153],[-10.1565818,12.1813242],[-10.1548426,12.1805177],[-10.1534704,12.1803384],[-10.1524823,12.1797836],[-10.1524619,12.1788492],[-10.1506155,12.1775813],[-10.1497357,12.1769101],[-10.1489418,12.1764486],[-10.1478045,12.1764906],[-10.1465171,12.1767213],[-10.1447575,12.1767842],[-10.1428489,12.1768146],[-10.1408093,12.1763438],[-10.1391356,12.1757355],[-10.1370542,12.1756096],[-10.1360672,12.1756516],[-10.135402,12.1761969],[-10.1347379,12.177339],[-10.1339214,12.1778539],[-10.1326769,12.1787559],[-10.1320557,12.1799189],[-10.1319473,12.1807065],[-10.1319902,12.1815245],[-10.1321415,12.1824988],[-10.1321404,12.1830347],[-10.1316469,12.1831605],[-10.1302951,12.1830137],[-10.1294153,12.1827201],[-10.1287716,12.1822796],[-10.1279133,12.1822796],[-10.1270346,12.1814081],[-10.1232784,12.1804129],[-10.1230638,12.1799514],[-10.1225059,12.1792173],[-10.1218633,12.1788702],[-10.1210039,12.178672],[-10.1198452,12.1783783],[-10.1181286,12.1779588],[-10.1171201,12.1779169],[-10.1159613,12.1777491],[-10.1144808,12.1771408],[-10.1136021,12.1763951],[-10.1128714,12.1760921],[-10.1119058,12.1762389],[-10.1113265,12.176973],[-10.1104467,12.1776442],[-10.1096099,12.1785881],[-10.1088803,12.1783364],[-10.1071648,12.1776536],[-10.1065843,12.1773925],[-10.1056627,12.1770663],[-10.1044815,12.1767213],[-10.1036017,12.1766164],[-10.1029151,12.1766584],[-10.1019495,12.1772247],[-10.1003187,12.1778749],[-10.0992898,12.1784926],[-10.0988596,12.1781476],[-10.0983671,12.1777375],[-10.097658,12.1781056],[-10.0952976,12.1785251],[-10.0944393,12.1791754],[-10.0936883,12.1802031],[-10.092551,12.181944],[-10.0914138,12.1832444],[-10.0913076,12.183988],[-10.091608,12.1852464],[-10.092359,12.1857288],[-10.0931529,12.186421],[-10.0930875,12.1874602],[-10.0928096,12.1879311],[-10.0921648,12.1882573],[-10.0912636,12.1881943],[-10.0903623,12.1871666],[-10.0893753,12.1853209],[-10.0886243,12.184377],[-10.0874226,12.1829508],[-10.0858777,12.1817343],[-10.0845913,12.1809676],[-10.0838821,12.1804129],[-10.0836461,12.1792802],[-10.0835817,12.1773925],[-10.083453,12.1760711],[-10.0828307,12.1756935],[-10.0821022,12.1753044],[-10.0819509,12.1747077],[-10.0822084,12.1739316],[-10.0823372,12.1735121],[-10.0831097,12.1731975],[-10.0839894,12.1729248],[-10.0848048,12.1727151],[-10.0856417,12.1725892],[-10.0862221,12.1726196],[-10.0867371,12.173186],[-10.0871652,12.1736589],[-10.0877445,12.1737848],[-10.0887326,12.1729762],[-10.0896542,12.171939],[-10.0904911,12.1703658],[-10.0910704,12.169359],[-10.0911563,12.1683312],[-10.091049,12.1668629],[-10.0914781,12.1647234],[-10.0918215,12.1628985],[-10.0922302,12.1618172],[-10.0928729,12.160675],[-10.0929158,12.1592906],[-10.0924223,12.1583466],[-10.0922077,12.1576964],[-10.0921004,12.1566895],[-10.0918644,12.1549065],[-10.0919475,12.1538394],[-10.0933798,12.1516498],[-10.0935085,12.1509183],[-10.0932464,12.1505269],[-10.0920743,12.1503224],[-10.0895817,12.1503261],[-10.089317,12.1492237],[-10.089325,12.1490717],[-10.0894457,12.1489484],[-10.0899178,12.148854],[-10.0906339,12.1488698],[-10.0922728,12.1483663],[-10.0924672,12.148205],[-10.0926027,12.1478865],[-10.0930908,12.1461978],[-10.0933805,12.1457782],[-10.0938606,12.1455082],[-10.0941959,12.145495],[-10.0943729,12.1455947],[-10.0944239,12.1457127],[-10.095183,12.1463158],[-10.0954163,12.1463472],[-10.0974548,12.1461742],[-10.0994316,12.1458412],[-10.0996515,12.145697],[-10.0997776,12.1454924],[-10.1000834,12.1445983],[-10.1001504,12.1441263],[-10.1002818,12.1439952],[-10.1005983,12.1439348],[-10.101639,12.1442154],[-10.1020628,12.1442076],[-10.10342,12.1435599],[-10.1048791,12.1431351],[-10.1052091,12.1431377],[-10.1067674,12.1436123],[-10.1078403,12.1438378],[-10.1082426,12.1437985],[-10.1096106,12.143316],[-10.1100102,12.1433344],[-10.1104125,12.1435494],[-10.1114291,12.1449444],[-10.1116142,12.1450388],[-10.1127702,12.1452066],[-10.1132476,12.1454819],[-10.1134354,12.1454636],[-10.1135373,12.145301],[-10.1136392,12.1450178],[-10.1140657,12.1429187],[-10.114232,12.1427326],[-10.1144452,12.1426998],[-10.1150675,12.1429935],[-10.1152459,12.1432269],[-10.1160599,12.1437578],[-10.1164314,12.1438247],[-10.116705,12.1437356],[-10.1168713,12.1435153],[-10.1170376,12.1431089],[-10.1170135,12.1427693],[-10.1170899,12.1425779],[-10.117114,12.1423038],[-10.1171999,12.1421911],[-10.1173098,12.1421518],[-10.1174667,12.1421636],[-10.1180555,12.1423143],[-10.1186523,12.1425634],[-10.1200604,12.1429214],[-10.1201972,12.1428807],[-10.1204547,12.1425975],[-10.1205701,12.1423379],[-10.1205245,12.1411606],[-10.1207417,12.1404263],[-10.1211065,12.1399386],[-10.1216,12.1397682],[-10.1219675,12.1394954],[-10.1225737,12.1394535],[-10.1241669,12.1398678],[-10.1247919,12.1402926],[-10.125044,12.140311],[-10.1252666,12.140269],[-10.1255482,12.1400514],[-10.125795,12.1397865],[-10.1259694,12.1397183],[-10.1262054,12.1396659],[-10.1262966,12.1395558],[-10.1263261,12.1392044],[-10.1265594,12.1388845],[-10.126648,12.1386327],[-10.1267928,12.1385698],[-10.1281956,12.1387927],[-10.1287428,12.1386406],[-10.1289177,12.138637],[-10.1290968,12.1386878],[-10.1292926,12.1388818],[-10.1295957,12.1394168],[-10.1297218,12.1395059],[-10.1299632,12.1395531],[-10.1302689,12.1394745],[-10.1307544,12.1390602],[-10.1311621,12.1385855],[-10.1315483,12.1378382],[-10.1315618,12.1376677],[-10.1314545,12.1375471],[-10.1312131,12.1375209],[-10.1306418,12.1376389],[-10.1305023,12.137555],[-10.1304486,12.137159],[-10.1307142,12.136548],[-10.1309904,12.1363697],[-10.1312426,12.1363592],[-10.131602,12.1365008],[-10.1322323,12.1371013],[-10.1329806,12.1379719],[-10.1339355,12.1383154],[-10.1344532,12.1386013],[-10.1345927,12.1386327],[-10.1351801,12.1385908],[-10.1359069,12.1388058],[-10.1367545,12.1389028],[-10.1370791,12.1388582],[-10.1389244,12.1383023],[-10.1392007,12.1380244],[-10.1399303,12.136965],[-10.1400188,12.1369047],[-10.1401019,12.1369492],[-10.1401636,12.1370725],[-10.1400831,12.1381581],[-10.1401636,12.1383758],[-10.1404855,12.138499],[-10.1409093,12.1385226],[-10.1411802,12.1383836],[-10.1420331,12.1372482],[-10.1423201,12.1371564],[-10.1437122,12.1373373],[-10.1442835,12.1371354],[-10.144482,12.1370017],[-10.1446268,12.136729],[-10.1446,12.1365166],[-10.1443854,12.1361206],[-10.1435298,12.1356303],[-10.143283,12.135313],[-10.1433152,12.1350114],[-10.1434976,12.134681],[-10.1438811,12.1346076],[-10.1445115,12.1347229],[-10.1454797,12.1353234],[-10.1456031,12.1355437],[-10.1461637,12.1356512],[-10.1467833,12.135903],[-10.14714,12.1358767],[-10.1475343,12.1356853],[-10.1476282,12.1355227],[-10.1476631,12.1352107],[-10.1475263,12.1346259],[-10.1476496,12.1344135],[-10.148052,12.1342824],[-10.1486206,12.1342745],[-10.1491061,12.1344476],[-10.1492643,12.1344292],[-10.1493797,12.1343453],[-10.1495165,12.1341172],[-10.1496747,12.1340805],[-10.1498142,12.134146],[-10.1499376,12.1342955],[-10.1500717,12.1343401],[-10.1504204,12.1342929],[-10.1506162,12.1341093],[-10.1506537,12.1339179],[-10.1505438,12.1338078],[-10.1504552,12.133695],[-10.150466,12.1335193],[-10.1505652,12.1334039],[-10.1507288,12.1333725],[-10.1513162,12.133341],[-10.151799,12.1331942],[-10.1522094,12.1329319],[-10.1526091,12.1329398],[-10.1530892,12.1330761],[-10.1536015,12.1329686],[-10.1543713,12.1326985],[-10.1545376,12.1327353],[-10.1545832,12.1328428],[-10.1545644,12.1330211],[-10.1542613,12.133341],[-10.1534191,12.1338314],[-10.1533654,12.1339258],[-10.1533628,12.1340543],[-10.1539797,12.1353392],[-10.1543069,12.1355647],[-10.1558358,12.1360524],[-10.1561844,12.1364825],[-10.1566243,12.1366241],[-10.1572251,12.1365402],[-10.1577455,12.1362098],[-10.1579064,12.1358689],[-10.1580298,12.1350455],[-10.1582283,12.1348882],[-10.158931,12.1350612],[-10.1603472,12.1352762],[-10.1608729,12.1352133],[-10.1614791,12.1349511],[-10.1620424,12.1341067],[-10.1627666,12.1337711],[-10.1635552,12.1331837],[-10.1638931,12.1325963],[-10.1645744,12.1322029],[-10.164966,12.1319092],[-10.1662213,12.1313428],[-10.1666772,12.1312956],[-10.1673666,12.1307371],[-10.167836,12.1300579],[-10.168013,12.1299871],[-10.1681578,12.1298612],[-10.1683,12.1296068],[-10.1686004,12.1294233],[-10.1687425,12.1291899],[-10.1689249,12.1291296],[-10.1694882,12.1291138],[-10.1696116,12.1291545],[-10.170258,12.1292305],[-10.1713228,12.1295203],[-10.1718767,12.1297327],[-10.1719934,12.1297497],[-10.1725808,12.1297511],[-10.1729509,12.1296121],[-10.173187,12.1294364],[-10.1734498,12.1291086],[-10.1739138,12.1282301],[-10.1742974,12.1278236],[-10.1746139,12.1271222],[-10.1748727,12.1269242],[-10.1751034,12.1266462],[-10.1754239,12.1265098],[-10.1756975,12.1263263],[-10.1763211,12.1262581],[-10.1765612,12.1261493],[-10.1772666,12.1263433],[-10.1785085,12.1269307],[-10.1786909,12.1268245],[-10.179804,12.1255999],[-10.1812175,12.1235413],[-10.1819122,12.1230116],[-10.1821167,12.1229551],[-10.18291,12.1227362],[-10.1840875,12.1220046],[-10.1841518,12.1219128],[-10.1841411,12.1218236],[-10.1838729,12.1215431],[-10.1838246,12.1213228],[-10.1838943,12.1211628],[-10.1842108,12.1209897],[-10.1856887,12.1207511],[-10.1859221,12.1206357],[-10.1863003,12.1201322],[-10.1871049,12.1195841],[-10.188489,12.1180002],[-10.1887652,12.1178035],[-10.1891407,12.1172187],[-10.1895323,12.1168673],[-10.1898515,12.1163637],[-10.1902914,12.1162641],[-10.1914448,12.1166916],[-10.1916862,12.1167361],[-10.191839,12.1166575],[-10.1920375,12.1164188],[-10.192456,12.1155219],[-10.1934162,12.1150604],[-10.1947707,12.1147955],[-10.1956424,12.1140376],[-10.1957551,12.1138068],[-10.1959026,12.1131984],[-10.1957819,12.1121153],[-10.196034,12.1117692],[-10.1960823,12.1115095],[-10.19638,12.1112027],[-10.1966268,12.1106756],[-10.1966456,12.110235],[-10.1963022,12.10879],[-10.1963452,12.1086169],[-10.196844,12.1079114],[-10.1970962,12.1072637],[-10.1971257,12.1068965],[-10.1969138,12.1060599],[-10.1968789,12.1053912],[-10.1970103,12.1051158],[-10.1974475,12.104788],[-10.1979947,12.1040432],[-10.1981261,12.1036839],[-10.1981208,12.1035081],[-10.1976943,12.1031777],[-10.1976675,12.1029181],[-10.1977345,12.1027292],[-10.19811,12.1022782],[-10.1983568,12.1018507],[-10.1984024,12.1015596],[-10.1982334,12.1008882],[-10.1982576,12.1007623],[-10.1985446,12.1006521],[-10.1986223,12.1005026],[-10.1986143,12.1003033],[-10.198499,12.0999965],[-10.1985164,12.0997539],[-10.1989308,12.0989238],[-10.1991695,12.0987953],[-10.1992527,12.0985829],[-10.1996389,12.0983521],[-10.200111,12.0983573],[-10.2006233,12.098457],[-10.2008539,12.0985619],[-10.2011275,12.0985488],[-10.2015781,12.0983678],[-10.2018625,12.0981685],[-10.2019617,12.0979167],[-10.2019966,12.0975863],[-10.2017123,12.0965871],[-10.2017444,12.0961884],[-10.2019107,12.0958501],[-10.2024418,12.0956036],[-10.2037937,12.0953623],[-10.2045818,12.0956663],[-10.2057517,12.0961176],[-10.2064866,12.0961858],[-10.2073878,12.0959786],[-10.2075407,12.0959734],[-10.2079189,12.0962015],[-10.2079189,12.0963222],[-10.2082139,12.0966395],[-10.2091849,12.0971168],[-10.2093136,12.0974053],[-10.2094692,12.0975627],[-10.2096355,12.0975522],[-10.2105555,12.0970513],[-10.2108291,12.0967785],[-10.2117544,12.0962199],[-10.2123714,12.0962199],[-10.2126101,12.0960153],[-10.212763,12.0957373],[-10.212822,12.095121],[-10.2134013,12.0946253],[-10.2136025,12.0946725],[-10.2138439,12.0949269],[-10.2144688,12.0950738],[-10.2146968,12.0950213],[-10.2149919,12.0943473],[-10.2150106,12.0939277],[-10.2147988,12.0932405],[-10.214662,12.0930727],[-10.2146378,12.0927763],[-10.2147371,12.0925586],[-10.2148819,12.0925114],[-10.2151421,12.0925193],[-10.2152601,12.0924406],[-10.2156651,12.0917954],[-10.2166334,12.0913863],[-10.2168962,12.0911424],[-10.2169713,12.0907962],[-10.2174246,12.0898913],[-10.2176848,12.0897576],[-10.2181596,12.0898127],[-10.2185699,12.0901589],[-10.2187496,12.0901825],[-10.2188998,12.090109],[-10.2191386,12.089616],[-10.2193049,12.0891937],[-10.2194014,12.0882075],[-10.2199486,12.0876122],[-10.2200827,12.0873079],[-10.2199566,12.0860385],[-10.220021,12.0858418],[-10.2204475,12.0856399],[-10.2209061,12.0847849],[-10.2210054,12.0843547],[-10.2215552,12.0841213],[-10.2218476,12.0837567],[-10.221692,12.0832427],[-10.2218315,12.0825529],[-10.2224457,12.0812441],[-10.2223921,12.080709],[-10.2225745,12.0803156],[-10.223465,12.0796153],[-10.2235723,12.0793583],[-10.2235401,12.0791118],[-10.2234086,12.0789045],[-10.2226657,12.07854],[-10.2222928,12.0780495],[-10.222207,12.0777898],[-10.2223089,12.0776062],[-10.2226308,12.0773807],[-10.2230546,12.0772181],[-10.2233684,12.0768482],[-10.2236232,12.076704],[-10.2238432,12.076043],[-10.2238163,12.0757571],[-10.2234703,12.0753899],[-10.2231216,12.0751985],[-10.2223679,12.0734411],[-10.2221265,12.073213],[-10.2218503,12.0726779],[-10.2214345,12.0721638],[-10.2213058,12.0719172],[-10.2204502,12.0713297],[-10.2202785,12.0710753],[-10.2202651,12.0707238],[-10.2203617,12.0704747],[-10.2212709,12.0696432],[-10.2212977,12.069533],[-10.220823,12.0689245],[-10.2200612,12.0672511],[-10.2194631,12.0665639],[-10.2192485,12.0661573],[-10.2191531,12.0657431],[-10.219101,12.0655173],[-10.2188328,12.0651816],[-10.2185404,12.064893],[-10.2184975,12.0646806],[-10.2186745,12.0637363],[-10.2187765,12.0635684],[-10.2191976,12.063133],[-10.2193987,12.0629966],[-10.2195248,12.0627501],[-10.2195409,12.0625193],[-10.2194631,12.0623855],[-10.2192043,12.0621651],[-10.2190997,12.0619842],[-10.2189897,12.0616615],[-10.2185753,12.0611238],[-10.2185592,12.0610189],[-10.218645,12.0608602],[-10.2189991,12.0605468],[-10.2191721,12.0604838],[-10.2192807,12.0604576],[-10.2193907,12.0603487],[-10.2194604,12.0602084],[-10.2194537,12.0601559],[-10.2188784,12.0595421],[-10.2186665,12.0594792],[-10.2184439,12.0594425],[-10.2179611,12.0591828],[-10.2175373,12.0587736],[-10.2174783,12.0585506],[-10.2175775,12.057769],[-10.2174541,12.0570214],[-10.2176178,12.0566883],[-10.2175561,12.0565099],[-10.2171779,12.056342],[-10.2170894,12.0561427],[-10.2172235,12.0554555],[-10.2175105,12.0552246],[-10.217599,12.0550541],[-10.2176473,12.0547866],[-10.217603,12.0541374],[-10.2176379,12.0539262],[-10.2176298,12.0536849],[-10.2177157,12.0533439],[-10.2178042,12.0532678],[-10.2181676,12.0532324],[-10.2183218,12.0531655],[-10.2184251,12.0530816],[-10.2184412,12.0529963],[-10.2181005,12.0523419],[-10.2180938,12.0522409],[-10.2182736,12.0520651],[-10.218295,12.0519156],[-10.2182186,12.0516507],[-10.2178296,12.0510867],[-10.2177505,12.0510513],[-10.2176607,12.051067],[-10.2176097,12.0510461],[-10.2175064,12.0509018],[-10.2172677,12.050772],[-10.2170478,12.0506906],[-10.2168922,12.0504441],[-10.2160352,12.0494565],[-10.2155793,12.0491207],[-10.2151849,12.0489319],[-10.2148417,12.0483285],[-10.2138895,12.0474865],[-10.2136454,12.0471507],[-10.2128863,12.0464294],[-10.2126423,12.0460516],[-10.2116391,12.0453722],[-10.2114272,12.0449709],[-10.2109203,12.0446587],[-10.2107325,12.044685],[-10.2104241,12.0449525],[-10.2100915,12.044984],[-10.2098393,12.0449158],[-10.2068594,12.0429091],[-10.2062385,12.0422271],[-10.2059917,12.0420828],[-10.2057087,12.0416736],[-10.2047123,12.0413575],[-10.203858,12.0407463],[-10.203685,12.0406912],[-10.2028871,12.0404958],[-10.2028039,12.0404276],[-10.2027395,12.040303],[-10.2025652,12.0401797],[-10.2000198,12.0395645],[-10.1992312,12.0394727],[-10.1986854,12.0394438],[-10.1978378,12.0391763],[-10.1975428,12.0389428],[-10.197406,12.0387028],[-10.1972424,12.0382582],[-10.1964927,12.0371538],[-10.1964149,12.0369387],[-10.196325,12.0368311],[-10.1961279,12.0368154],[-10.1958033,12.0370043],[-10.1952454,12.0380929],[-10.1950443,12.0381703],[-10.1948411,12.0381442],[-10.1939835,12.0380339],[-10.1935785,12.0378647],[-10.1930246,12.037243],[-10.1927523,12.0365085],[-10.1923808,12.0360074],[-10.1922762,12.0357844],[-10.1919436,12.0356008],[-10.1915601,12.0355352],[-10.1905543,12.0356585],[-10.1902713,12.0355903],[-10.1898301,12.0352113],[-10.1896597,12.0348925],[-10.1896269,12.0344434],[-10.1896852,12.0341147],[-10.1898099,12.0338695],[-10.1901774,12.0336203],[-10.1903866,12.0333369],[-10.1905476,12.033253],[-10.1906347,12.033089],[-10.1906696,12.0325696],[-10.1905087,12.0320974],[-10.190455,12.0315374],[-10.190341,12.03122],[-10.1901385,12.0308632],[-10.1899923,12.0308173],[-10.189763,12.0308238],[-10.1896732,12.0308868],[-10.189582,12.0310652],[-10.1895243,12.0311124],[-10.189358,12.0311334],[-10.1891582,12.0312514],[-10.1889811,12.0314574],[-10.1889543,12.0315741],[-10.1889262,12.0318049],[-10.1888444,12.0319191],[-10.1886942,12.0319702],[-10.1885587,12.0319361],[-10.1884045,12.0317905],[-10.1883937,12.0317158],[-10.1884648,12.0316134],[-10.1884715,12.0315439],[-10.1883642,12.0314311],[-10.1882127,12.0313511],[-10.1881604,12.0312672],[-10.1881255,12.0310206],[-10.1881765,12.0304644],[-10.1882462,12.0303438],[-10.18832,12.0303149],[-10.1886874,12.0302782],[-10.1888618,12.0302087],[-10.1889503,12.0301365],[-10.1889637,12.030008],[-10.18889,12.0296893],[-10.1888953,12.0293915],[-10.1889919,12.0292289],[-10.1889905,12.0290413],[-10.1888524,12.0286885],[-10.1888511,12.028312],[-10.1886593,12.0278818],[-10.1882395,12.0275578],[-10.1881483,12.0272194],[-10.1882087,12.0268653],[-10.1883736,12.0266423],[-10.1884018,12.0264232],[-10.1882905,12.0262199],[-10.1882972,12.0261215],[-10.188379,12.0258828],[-10.1882704,12.0252178],[-10.1881416,12.0249607],[-10.1881845,12.0247456],[-10.1883066,12.0244911],[-10.1883173,12.0241488],[-10.1881979,12.0238235],[-10.1881604,12.0236805],[-10.1881215,12.0236517],[-10.1877527,12.023527],[-10.1876561,12.0233591],[-10.1876521,12.0230234],[-10.1877071,12.0228515],[-10.1877634,12.0228082],[-10.1879083,12.0227886],[-10.1879525,12.0227322],[-10.1880625,12.0224226],[-10.1884125,12.0220448],[-10.1885292,12.0216618],[-10.1890402,12.0210925],[-10.1892829,12.0209155],[-10.1894331,12.0208656],[-10.1894854,12.0208092],[-10.1896195,12.0204708],[-10.1895605,12.0197179],[-10.1896732,12.0192339],[-10.1900071,12.0187538],[-10.1902002,12.0183039],[-10.1901814,12.018174],[-10.1900929,12.0179812],[-10.1900084,12.0179353],[-10.1895149,12.0178985],[-10.1893875,12.0178198],[-10.1891086,12.0174263],[-10.1889181,12.0169895],[-10.1888108,12.0168492],[-10.1887666,12.0167167],[-10.1887666,12.0165396],[-10.1886794,12.0163652],[-10.1886566,12.0161881],[-10.1886755,12.0157617],[-10.1886874,12.0154942],[-10.1888631,12.0151676],[-10.188894,12.0150534],[-10.1889436,12.0150128],[-10.1890697,12.0148318],[-10.1891595,12.0146494],[-10.1894304,12.0145589],[-10.1904376,12.0137863],[-10.1905301,12.0136696],[-10.1905502,12.0136],[-10.1904765,12.013461],[-10.1904228,12.0134361],[-10.1903115,12.0134334],[-10.1902485,12.0133862],[-10.1902163,12.0131986],[-10.190105,12.0130544],[-10.1898663,12.0129966],[-10.1898207,12.0129232],[-10.1898368,12.0126936],[-10.190329,12.0123277],[-10.1906133,12.0122476],[-10.1913093,12.0122057],[-10.1914769,12.0121204],[-10.1915614,12.0119433],[-10.1915775,12.0117938],[-10.1915225,12.0116875],[-10.1908439,12.0116705],[-10.190683,12.011555],[-10.1906776,12.0114396],[-10.1908131,12.0111392],[-10.1909499,12.0104899],[-10.1910196,12.0099967],[-10.1911712,12.0095481],[-10.1910961,12.0090706],[-10.190455,12.0082166],[-10.190046,12.0069888],[-10.189826,12.0067999],[-10.1895605,12.0060365],[-10.1892561,12.0055092],[-10.1892293,12.0050408],[-10.1893915,12.0045883],[-10.1893714,12.0044952],[-10.189185,12.004423],[-10.1891287,12.0043207],[-10.1891515,12.0035061],[-10.1898193,12.0018349],[-10.18994,12.0017981],[-10.1900272,12.0018244],[-10.1901197,12.0019109],[-10.1902002,12.0019123],[-10.1902753,12.0018519],[-10.1903853,12.0016617],[-10.1904081,12.0015069],[-10.1905623,12.001377],[-10.19062,12.0012564],[-10.1905851,12.0009258],[-10.190447,12.0005637],[-10.1904845,12.0002135],[-10.1907635,11.9997622],[-10.1907782,11.9995589],[-10.1906978,11.9992283],[-10.1905328,11.9989633],[-10.1900916,11.9986013],[-10.1899628,11.9983652],[-10.1898649,11.9982707],[-10.1899105,11.9976187],[-10.1898046,11.9971176],[-10.1896665,11.9968002],[-10.1896665,11.9967201],[-10.1899374,11.9963948],[-10.190164,11.9959383],[-10.1901667,11.9957809],[-10.190396,11.9952522],[-10.1903799,11.9951079],[-10.1900661,11.9946016],[-10.1901412,11.9939404],[-10.1898301,11.9934681],[-10.1880276,11.9922639],[-10.1876923,11.9918756],[-10.187341,11.9916499],[-10.1870781,11.9912511],[-10.1866758,11.9908471],[-10.1864505,11.9904116],[-10.1864047,11.9897958],[-10.1863968,11.98969],[-10.1860428,11.9888295],[-10.185678,11.9883493],[-10.1857156,11.9880581],[-10.1858081,11.987801],[-10.1858054,11.9877249],[-10.1859757,11.9876357],[-10.1866061,11.9863396],[-10.1866382,11.9859565],[-10.1865256,11.9855918],[-10.1865256,11.9852743],[-10.1865886,11.9852094],[-10.1866476,11.9851812],[-10.1866771,11.9851241],[-10.1866758,11.9850185],[-10.1867147,11.9849227],[-10.1867154,11.9848473],[-10.1867804,11.9848132],[-10.1868475,11.9846131],[-10.1869547,11.9844793],[-10.1869494,11.9841933],[-10.1867643,11.9840438],[-10.1867643,11.9837499],[-10.1867616,11.9836292],[-10.186834,11.9835479],[-10.1868528,11.9834154],[-10.1868367,11.9833078],[-10.1871237,11.9823488],[-10.1870567,11.9818398],[-10.1871103,11.981239],[-10.1870352,11.9805384],[-10.1868729,11.9802105],[-10.1868649,11.9800465],[-10.1867925,11.9799573],[-10.1866128,11.9799218],[-10.1864666,11.9797749],[-10.1864344,11.9795361],[-10.1861353,11.9792711],[-10.1859248,11.9790153],[-10.1858135,11.9789812],[-10.1854004,11.9789222],[-10.1848894,11.9789366],[-10.1846132,11.9787752],[-10.1843356,11.9787621],[-10.1841585,11.978665],[-10.1840767,11.978425],[-10.1834719,11.9778648],[-10.1833324,11.9775867],[-10.1832654,11.977563],[-10.183138,11.977567],[-10.1830736,11.9775014],[-10.1829341,11.976608],[-10.1828523,11.9764125],[-10.1826364,11.9763692],[-10.1825237,11.9763836],[-10.1823655,11.9764689],[-10.182045,11.9764164],[-10.1817834,11.9762826],[-10.1817352,11.9762105],[-10.1817177,11.9759376],[-10.1816574,11.9758431],[-10.1814093,11.975708],[-10.1810391,11.9756765],[-10.1809278,11.9756057],[-10.1807079,11.9752829],[-10.1803941,11.9749917],[-10.1800132,11.9736273],[-10.1799354,11.9729923],[-10.1795894,11.9718641],[-10.179643,11.9714731],[-10.1798683,11.9706571],[-10.1798455,11.9704472],[-10.1796953,11.9702674],[-10.1794888,11.9700168],[-10.1793037,11.9699591],[-10.1792622,11.9699106],[-10.1793118,11.9692375],[-10.1790771,11.9689515],[-10.1789913,11.9685973],[-10.1788491,11.9684792],[-10.1780525,11.9682746],[-10.1776502,11.9680358],[-10.1772183,11.9675425],[-10.1766899,11.9673195],[-10.1763868,11.9670938],[-10.1765022,11.9660128],[-10.1766765,11.9657346],[-10.1774141,11.9652518],[-10.1675315,11.9586591],[-10.1678628,11.9576449],[-10.1680371,11.955509],[-10.1681685,11.9547165],[-10.1684904,11.9541786],[-10.168654,11.953638],[-10.1687881,11.9526934],[-10.1691127,11.9521476],[-10.1694426,11.9519639],[-10.1701131,11.9511557],[-10.1702419,11.9506965],[-10.1703894,11.9505863],[-10.17084,11.9504629],[-10.1711941,11.950211],[-10.1713429,11.9502241],[-10.1718405,11.9503186],[-10.1721275,11.9502989],[-10.1727766,11.9499853],[-10.173195,11.9499906],[-10.1735799,11.94982],[-10.1738441,11.9497977],[-10.1740909,11.949492],[-10.1746018,11.9491574],[-10.1748875,11.9491758],[-10.1752067,11.9490905],[-10.1756372,11.94863],[-10.1761776,11.9484529],[-10.1765585,11.9480435],[-10.1766121,11.9477129],[-10.1765531,11.9472773],[-10.1766926,11.9469676],[-10.177229,11.9468653],[-10.1774973,11.9465583],[-10.1775938,11.9462329],[-10.1776019,11.9458708],[-10.1773471,11.9455755],[-10.1773243,11.94538],[-10.1774248,11.9451268],[-10.1775268,11.9450546],[-10.177799,11.9450009],[-10.1780391,11.9448683],[-10.1781933,11.9446886],[-10.1782107,11.9446046],[-10.178196,11.9445206],[-10.1769018,11.9433568],[-10.1765156,11.9427953],[-10.1759684,11.9425224],[-10.1757538,11.9423282],[-10.1757968,11.942071],[-10.1760274,11.9416301],[-10.1761079,11.9411001],[-10.1760703,11.9405595],[-10.1763144,11.9399822],[-10.1764271,11.9393077],[-10.1761615,11.9381032],[-10.1761776,11.9375522],[-10.1759282,11.9370011],[-10.1752013,11.936101],[-10.1749733,11.9353924],[-10.1739138,11.93381],[-10.1737073,11.9324244],[-10.1738656,11.9318103],[-10.1737315,11.9290496],[-10.1742196,11.9273018],[-10.1741499,11.9265985],[-10.1737744,11.9260632],[-10.1726747,11.9251446],[-10.1711243,11.9226253],[-10.170266,11.9215388],[-10.1702392,11.9211294],[-10.1704162,11.9203526],[-10.1702124,11.9187622],[-10.1699603,11.9182163],[-10.1688713,11.9176442],[-10.1682866,11.9171298],[-10.1681256,11.916668],[-10.1680934,11.9164528],[-10.1681471,11.9163058],[-10.168477,11.9159672],[-10.1685119,11.9156471],[-10.1682866,11.9152481],[-10.1679701,11.9148965],[-10.1675892,11.9148519],[-10.1674148,11.9149542],[-10.1672351,11.9155893],[-10.1671171,11.9157337],[-10.1669911,11.915773],[-10.1664922,11.9154765],[-10.1662159,11.9154528],[-10.1660845,11.9153111],[-10.1660174,11.9150146],[-10.1660845,11.9146078],[-10.1664948,11.9146183],[-10.1666397,11.9144398],[-10.1667497,11.9142509],[-10.1670206,11.9141091],[-10.167793,11.9139622],[-10.1681525,11.9141485],[-10.1682973,11.9144293],[-10.168359,11.9145238],[-10.1685521,11.9145553],[-10.169346,11.9143558],[-10.1707917,11.9134845],[-10.1713389,11.9134399],[-10.1722482,11.9130174],[-10.1724762,11.912831],[-10.1731655,11.911406],[-10.1734123,11.9112144],[-10.1737556,11.9112065],[-10.1739004,11.911154],[-10.1739889,11.9110175],[-10.1742545,11.9108785],[-10.1745844,11.9108706],[-10.1747078,11.910763],[-10.1747802,11.9105898],[-10.1753944,11.9104953],[-10.1757753,11.9099966],[-10.1765853,11.909582],[-10.1767516,11.9090466],[-10.1767704,11.9088602],[-10.1770359,11.9086503],[-10.177103,11.9084666],[-10.1770923,11.9070572],[-10.1765209,11.9062646],[-10.1765102,11.906115],[-10.1766792,11.9053198],[-10.17658,11.9051334],[-10.1765558,11.9049812],[-10.176757,11.904354],[-10.1765397,11.9035824],[-10.1765639,11.9034196],[-10.1767597,11.9031283],[-10.1772451,11.9028291],[-10.1777065,11.9023724],[-10.1788598,11.9018921],[-10.1789698,11.9017609],[-10.1789966,11.9016507],[-10.1788303,11.9011415],[-10.178833,11.9006402],[-10.1790074,11.9001586],[-10.1793534,11.8998594],[-10.1797248,11.8992663],[-10.1797597,11.8990235],[-10.1797168,11.8986771],[-10.1797584,11.8982873],[-10.1795411,11.8977099],[-10.1793453,11.8971377],[-10.1793212,11.8970039],[-10.1794553,11.8967099],[-10.1794606,11.896538],[-10.1791643,11.8961089],[-10.1791482,11.8960407],[-10.1791683,11.8959462],[-10.1792407,11.8958372],[-10.1792648,11.8957191],[-10.1791951,11.8952861],[-10.1792635,11.895084],[-10.1795357,11.8947179],[-10.1796377,11.8942126],[-10.1797745,11.893962],[-10.1798067,11.8933806],[-10.1798657,11.8932441],[-10.1800776,11.8930591],[-10.1803257,11.8926247],[-10.1803713,11.8924909],[-10.1803444,11.8924174],[-10.180213,11.8922428],[-10.1801902,11.8921707],[-10.1801969,11.8920788],[-10.1802666,11.891962],[-10.1804075,11.8918518],[-10.180618,11.8917835],[-10.1808983,11.8919292],[-10.181074,11.8919344],[-10.1811826,11.8918714],[-10.1812175,11.8918124],[-10.1812081,11.8917245],[-10.1811424,11.8916313],[-10.1811411,11.8915197],[-10.1812443,11.8912888],[-10.1817513,11.8910211],[-10.181876,11.8908662],[-10.1867348,11.8866956],[-10.1871479,11.8866536],[-10.1874349,11.8859659],[-10.1888269,11.8854095],[-10.1891246,11.8850604],[-10.1893526,11.8846588],[-10.1897389,11.8844121],[-10.1900795,11.8843071],[-10.1903853,11.8843754],[-10.190447,11.8844383],[-10.1905087,11.8845748],[-10.190565,11.8846378],[-10.1912999,11.8848058],[-10.1917881,11.8848426],[-10.1920295,11.8848242],[-10.1923057,11.8846588],[-10.1922521,11.8845565],[-10.1921985,11.8843675],[-10.1923138,11.8838294],[-10.1923379,11.8836352],[-10.1922467,11.8833937],[-10.1917049,11.8829711],[-10.1914582,11.8827402],[-10.1913536,11.8824803],[-10.1913562,11.8816614],[-10.1911604,11.8811548],[-10.1912946,11.8797742],[-10.1912329,11.8794776],[-10.1909056,11.8788057],[-10.1908815,11.8786954],[-10.1910371,11.8770943],[-10.1910907,11.8769211],[-10.1914501,11.8767951],[-10.1915574,11.8766061],[-10.1915628,11.8759814],[-10.1918095,11.875026],[-10.1917344,11.8744905],[-10.1919758,11.8740915],[-10.1922709,11.8729051],[-10.1930648,11.8719654],[-10.1931989,11.8716609],[-10.1931614,11.8712305],[-10.1927269,11.869813],[-10.1915494,11.8680649],[-10.1911658,11.8677184],[-10.1909164,11.8675714],[-10.1905435,11.8674165],[-10.1893285,11.8674087],[-10.1876467,11.8666789],[-10.1865685,11.8656237],[-10.1862413,11.8654242],[-10.1853883,11.8653298],[-10.1842564,11.864411],[-10.1841357,11.8641774],[-10.1838729,11.8639779],[-10.1838112,11.8638703],[-10.1838005,11.8635973],[-10.1837334,11.8634267],[-10.183205,11.863054],[-10.1829851,11.8626865],[-10.1827383,11.86171],[-10.1825345,11.8614212],[-10.1818156,11.860933],[-10.1811934,11.8600064],[-10.1811639,11.8591585],[-10.1808567,11.8588816],[-10.180846,11.8588409],[-10.1808608,11.8587556],[-10.180842,11.8587005],[-10.1803243,11.8583291],[-10.1802707,11.8581243],[-10.1803538,11.8575704],[-10.1804021,11.8569562],[-10.1803672,11.8567541],[-10.1804236,11.8565966],[-10.1802921,11.8558721],[-10.180319,11.8557881],[-10.1804692,11.8556857],[-10.181239,11.8555466],[-10.1827759,11.8542997],[-10.1834545,11.8542472],[-10.1837763,11.8540871],[-10.1843262,11.8534492],[-10.1845086,11.8533626],[-10.1848465,11.8533757],[-10.1852837,11.8532812],[-10.1858416,11.8529504],[-10.1863056,11.8528297],[-10.187054,11.8521603],[-10.1873705,11.8514122],[-10.1872417,11.8509528],[-10.1872739,11.8506745],[-10.1875207,11.8504147],[-10.1878291,11.850307],[-10.1884595,11.8503963],[-10.1895833,11.8504435],[-10.1898381,11.8503412],[-10.1900634,11.8500052],[-10.1906106,11.8495641],[-10.1910692,11.848816],[-10.1912811,11.8487688],[-10.1921153,11.8483934],[-10.192582,11.8477896],[-10.1928288,11.8464666],[-10.1933089,11.8458313],[-10.1935181,11.8451068],[-10.193333,11.8440436],[-10.1934189,11.8433716],[-10.1934752,11.8432351],[-10.1936898,11.8432036],[-10.1942718,11.8434057],[-10.1945347,11.843348],[-10.1946983,11.8431616],[-10.1947895,11.8424502],[-10.1949558,11.8418096],[-10.1950523,11.841765],[-10.1956478,11.84187],[-10.1957846,11.8418306],[-10.1961198,11.8415077],[-10.1963639,11.8409643],[-10.1963183,11.8403579],[-10.1964471,11.839846],[-10.1967099,11.83951],[-10.1967394,11.8393],[-10.1972356,11.8390349],[-10.1982898,11.8387618],[-10.1989362,11.8387986],[-10.1996014,11.8386437],[-10.199942,11.8387277],[-10.2011517,11.8382368],[-10.2020824,11.8380609],[-10.2030855,11.8382158],[-10.2034825,11.8381948],[-10.2037829,11.8380373],[-10.2041075,11.8374991],[-10.2047619,11.837066],[-10.2058643,11.8368665],[-10.2061111,11.8367378],[-10.2065563,11.83605],[-10.2071142,11.8359713],[-10.208289,11.8349895],[-10.2103838,11.8342439],[-10.2106977,11.8338396],[-10.2109256,11.8337241],[-10.2117303,11.833711],[-10.2118993,11.8336559],[-10.2125001,11.8330258],[-10.2126852,11.8323643],[-10.2129936,11.8321017],[-10.2137178,11.8318891],[-10.2141309,11.8319626],[-10.2143616,11.8319705],[-10.2150455,11.831708],[-10.2159306,11.831112],[-10.2160621,11.8308364],[-10.2161264,11.8291562],[-10.2158716,11.8277648],[-10.2159977,11.8273159],[-10.2162096,11.8259797],[-10.2164564,11.8254362],[-10.2164295,11.8252866],[-10.2160835,11.8249847],[-10.2157053,11.8243257],[-10.2156571,11.8240291],[-10.215928,11.8230761],[-10.2163571,11.822551],[-10.21651,11.8222045],[-10.21651,11.8216847],[-10.2165636,11.8214694],[-10.2169794,11.820926],[-10.2170545,11.8207606],[-10.2169874,11.8199625],[-10.2165395,11.8185947],[-10.2165502,11.8182849],[-10.2166387,11.8180617],[-10.217261,11.817681],[-10.2174944,11.8173056],[-10.217438,11.8169722],[-10.2165234,11.8154285],[-10.2165422,11.8152788],[-10.2169526,11.8149191],[-10.2172235,11.8144571],[-10.2171752,11.8136458],[-10.2172315,11.8134358],[-10.2176982,11.812937],[-10.217945,11.8124066],[-10.2183446,11.8120128],[-10.2187523,11.8118238],[-10.2187845,11.8117109],[-10.218747,11.8115376],[-10.2187872,11.8114274],[-10.218865,11.8113854],[-10.2189562,11.8112777],[-10.2190179,11.8104271],[-10.2191734,11.81007],[-10.220198,11.8090619],[-10.2206969,11.8083845],[-10.2220488,11.807035],[-10.2224082,11.8057328],[-10.2231914,11.8047955],[-10.2244198,11.8041575],[-10.2245164,11.8039763],[-10.2244896,11.8038398],[-10.2241597,11.8036245],[-10.2240846,11.8034827],[-10.2241033,11.8031309],[-10.2240041,11.8029288],[-10.2240121,11.8023459],[-10.2241141,11.8021516],[-10.2242053,11.8021096],[-10.2243984,11.8021674],[-10.2246022,11.8022041],[-10.224731,11.8021043],[-10.2248597,11.8018838],[-10.2248436,11.8015005],[-10.2245432,11.8007076],[-10.2250636,11.7998149],[-10.2250759,11.7991058],[-10.22479,11.798313],[-10.2247979,11.797458],[-10.2252982,11.797287],[-10.225854,11.7975357],[-10.2265528,11.7974036],[-10.2270848,11.7969372],[-10.2272356,11.796533],[-10.2269498,11.796362],[-10.2264734,11.7955459],[-10.2262748,11.7945588],[-10.2264654,11.7939525],[-10.226386,11.793012],[-10.2266401,11.792569],[-10.2265845,11.7919394],[-10.2260843,11.7910922],[-10.2260446,11.7905714],[-10.2271245,11.7896309],[-10.2272277,11.7891801],[-10.2268386,11.7887448],[-10.226639,11.7884693],[-10.226521,11.7880996],[-10.2270212,11.7858766],[-10.2274825,11.7848567],[-10.2278311,11.7842287],[-10.2283314,11.783879],[-10.2291731,11.7840189],[-10.2303403,11.7840422],[-10.2306023,11.7837935],[-10.231039,11.7824565],[-10.2309596,11.7817802],[-10.2316981,11.7809408],[-10.2321348,11.7808553],[-10.2334529,11.7796815],[-10.2343898,11.7783368],[-10.2367719,11.778329],[-10.2376612,11.7775595],[-10.238622,11.7769065],[-10.2396543,11.7766889],[-10.2404721,11.7769843],[-10.2413932,11.7768055],[-10.2419172,11.7764324],[-10.2421951,11.7751809],[-10.2428621,11.7741859],[-10.2434577,11.772538],[-10.2437276,11.7722737],[-10.2445455,11.7724291],[-10.245546,11.7731055],[-10.2458318,11.7729655],[-10.246078,11.7721027],[-10.2460224,11.7702682],[-10.2462526,11.7694753],[-10.2462368,11.7685891],[-10.2466655,11.7675553],[-10.2476184,11.7664671],[-10.2475866,11.765954],[-10.2469196,11.7658219],[-10.2466576,11.7654254],[-10.2471578,11.7649045],[-10.248206,11.7630701],[-10.2472769,11.7620673],[-10.2472372,11.7613909],[-10.247936,11.7607923],[-10.2484124,11.7602715],[-10.2483409,11.7596419],[-10.2459906,11.7580948],[-10.245141,11.7567267],[-10.2455142,11.7561747],[-10.2459986,11.7560037],[-10.2464353,11.7561747],[-10.2466576,11.7559882],[-10.2466497,11.7554673],[-10.2445455,11.7521868],[-10.2440929,11.7506165],[-10.2437753,11.7504221],[-10.2431003,11.7504998],[-10.2423937,11.7503444],[-10.2419649,11.7496758],[-10.2413694,11.7490694],[-10.2406785,11.7490384],[-10.2402418,11.7494037],[-10.2393208,11.7498857],[-10.2384394,11.7499091],[-10.2381218,11.749707],[-10.237566,11.7486575],[-10.2377962,11.7482144],[-10.2383123,11.7478645],[-10.2386855,11.7472116],[-10.2391381,11.7465896],[-10.2394637,11.7457423],[-10.2391302,11.7451048],[-10.2386935,11.7450659],[-10.2382568,11.7448093],[-10.2382965,11.7443507],[-10.2389873,11.7436355],[-10.2389714,11.7431456],[-10.2385585,11.7424693],[-10.2381853,11.7423682],[-10.2375501,11.7427569],[-10.2371928,11.742788],[-10.2358191,11.7420573],[-10.2345089,11.7420728],[-10.2338737,11.7417852],[-10.2334132,11.7410622],[-10.2325953,11.7399349],[-10.2318648,11.7392041],[-10.2314281,11.7392974],[-10.2308802,11.7397172],[-10.2304197,11.7398416],[-10.2289745,11.7406579],[-10.2284425,11.7407046],[-10.2268545,11.7412487],[-10.2258461,11.7413343],[-10.2254014,11.7412411],[-10.2246153,11.7412954],[-10.2238769,11.7411555],[-10.2231146,11.7410544],[-10.222797,11.7412254],[-10.2223206,11.7419096],[-10.2217251,11.742135],[-10.2213122,11.7428658],[-10.2207722,11.7435266],[-10.2200735,11.7439852],[-10.2196129,11.7439541],[-10.2185807,11.7427958],[-10.217739,11.7414042],[-10.2168021,11.739072],[-10.2162939,11.7384267],[-10.215611,11.7372994],[-10.2158016,11.7365842],[-10.2158175,11.7358146],[-10.2156745,11.7345162],[-10.2153887,11.7340731],[-10.2149282,11.7339876],[-10.2147376,11.7338632],[-10.2147614,11.7335989],[-10.2148964,11.7335522],[-10.2150234,11.7333967],[-10.2144835,11.7321684],[-10.2149679,11.7290586],[-10.2151584,11.7288642],[-10.2161748,11.7276281],[-10.2175008,11.7267496],[-10.2177787,11.7261742],[-10.2174611,11.7254201],[-10.2174849,11.7249147],[-10.220939,11.7235231],[-10.2210184,11.7232043],[-10.2205975,11.7227923],[-10.219343,11.7211596],[-10.2194859,11.7208797],[-10.2201291,11.7206309],[-10.2209151,11.7198379],[-10.2208754,11.7194258],[-10.2197797,11.7189127],[-10.2197241,11.7181196],[-10.2200655,11.7172178],[-10.2208011,11.7163274],[-10.2216456,11.7153051],[-10.2235434,11.7129338],[-10.2237816,11.7117364],[-10.2236942,11.7107179],[-10.2238292,11.7094273],[-10.2251553,11.7059907],[-10.2249568,11.7057263],[-10.2251791,11.7049177],[-10.2244962,11.7032538],[-10.2241627,11.7031916],[-10.223599,11.7029739],[-10.2226858,11.7028184],[-10.2223762,11.7025774],[-10.2226699,11.7011156],[-10.222932,11.6999415],[-10.2229796,11.6983165],[-10.2227096,11.6975623],[-10.2226699,11.6970724],[-10.2232628,11.6968935],[-10.2245888,11.6961004],[-10.2256528,11.6951129],[-10.2270979,11.6931457],[-10.2271456,11.6926092],[-10.2276617,11.691334],[-10.2279872,11.6912018],[-10.2285828,11.6913729],[-10.2300041,11.6914506],[-10.2301549,11.6910385],[-10.2297103,11.6898178],[-10.22975,11.6889236],[-10.2300835,11.6887058],[-10.2308299,11.6889469],[-10.2317748,11.6889313],[-10.2324418,11.6886514],[-10.2324973,11.6877494],[-10.2331881,11.686482],[-10.2342363,11.6855334],[-10.2348794,11.6853234],[-10.2380863,11.6839844],[-10.2385478,11.6837916],[-10.2393975,11.6837216],[-10.2401597,11.6840793],[-10.2401835,11.6846236],[-10.2404694,11.6854245],[-10.2405885,11.6864664],[-10.2409696,11.6868319],[-10.2419225,11.6866764],[-10.2431612,11.6861632],[-10.2437805,11.6855722],[-10.2439314,11.6849968],[-10.2435344,11.6833406],[-10.2439234,11.6831462],[-10.2444157,11.683916],[-10.2450033,11.684126],[-10.2476474,11.6839316],[-10.2485606,11.6836439],[-10.2505377,11.6811478],[-10.2513556,11.6809534],[-10.2525784,11.6804169],[-10.2536027,11.6802847],[-10.2546428,11.68114],[-10.2557783,11.6812567],[-10.2565406,11.6808135],[-10.2574855,11.6794138],[-10.2580413,11.6791028],[-10.258351,11.6794605],[-10.2590894,11.6797404],[-10.2605107,11.6794216],[-10.2626228,11.6783096],[-10.2628055,11.6777342],[-10.2625276,11.6762568],[-10.2632501,11.675417],[-10.2636551,11.6744838],[-10.2632581,11.6734341],[-10.2628213,11.6728275],[-10.2625355,11.6721588],[-10.263656,11.6706161],[-10.2640461,11.6696032],[-10.2646468,11.6682325],[-10.2646716,11.6676685],[-10.2643929,11.6673046],[-10.264009,11.6673046],[-10.2631853,11.6676018],[-10.2626775,11.6675896],[-10.2623183,11.667159],[-10.2620396,11.6658672],[-10.2616886,11.6652461],[-10.2615161,11.6649404],[-10.261446,11.6634433],[-10.2621332,11.6612182],[-10.262042,11.6606756],[-10.2607846,11.6588935],[-10.2608013,11.6585821],[-10.2614922,11.6579791],[-10.2619418,11.6579175],[-10.2625891,11.6582697],[-10.2636501,11.6586307],[-10.2639198,11.6584194],[-10.2641715,11.6572571],[-10.2654123,11.6556369],[-10.2657,11.6548532],[-10.2641356,11.6529335],[-10.2643424,11.6509082],[-10.2646031,11.6503711],[-10.26472,11.6491295],[-10.2641895,11.648152],[-10.2641086,11.6475356],[-10.2645491,11.6472539],[-10.2650976,11.6474476],[-10.2654842,11.6474388],[-10.2657719,11.6470249],[-10.2652684,11.6455367],[-10.264213,11.6436853],[-10.2636989,11.64218],[-10.263945,11.6409908],[-10.2646556,11.6405958],[-10.2651743,11.639749],[-10.2651628,11.6393313],[-10.2647363,11.6391393],[-10.2640331,11.63932],[-10.2626152,11.6392974],[-10.2621195,11.6386764],[-10.2602751,11.6343069],[-10.260247,11.6339125],[-10.2604364,11.633494],[-10.2615777,11.632331],[-10.2616007,11.6314842],[-10.260448,11.6306035],[-10.260033,11.629847],[-10.2615684,11.6281339],[-10.2617737,11.6279049],[-10.2627766,11.6272162],[-10.2639524,11.6269903],[-10.265059,11.6263693],[-10.2653242,11.6256128],[-10.2650936,11.6246079],[-10.2643443,11.6239078],[-10.261935,11.6207463],[-10.2619161,11.6198319],[-10.2627142,11.6181591],[-10.2634913,11.6171556],[-10.2651051,11.6140165],[-10.2660619,11.6115436],[-10.2662233,11.6099628],[-10.2671686,11.6063494],[-10.2673014,11.6061543],[-10.2679755,11.6051637],[-10.2688286,11.6036167],[-10.2699352,11.6031425],[-10.2703272,11.6027359],[-10.2697739,11.6020358],[-10.2684136,11.5989418],[-10.2662694,11.5964236],[-10.2661657,11.5957347],[-10.2668458,11.5943684],[-10.2680793,11.5934085],[-10.2682291,11.5923018],[-10.2684366,11.5918727],[-10.2693127,11.5915565],[-10.2699007,11.5910935],[-10.2699237,11.590416],[-10.2699814,11.5896255],[-10.2701427,11.5866894],[-10.2700275,11.5841711],[-10.2696586,11.5830192],[-10.2680793,11.5805686],[-10.2676989,11.5793829],[-10.268356,11.5760288],[-10.2683214,11.5742219],[-10.2657161,11.5682703],[-10.265889,11.5678863],[-10.2663617,11.567796],[-10.2672839,11.567988],[-10.2689093,11.5678186],[-10.2693358,11.5673668],[-10.2692782,11.5665763],[-10.268794,11.565605],[-10.2660617,11.5631923],[-10.2642636,11.562951],[-10.2610589,11.5638545],[-10.2603557,11.5634931],[-10.2600791,11.562951],[-10.2600214,11.5617765],[-10.2596756,11.5589191],[-10.2592491,11.5588852],[-10.2582808,11.5600372],[-10.2571511,11.5611214],[-10.2559868,11.5615619],[-10.2542576,11.5617539],[-10.2524939,11.5617539],[-10.2516293,11.5620475],[-10.2510529,11.5626912],[-10.2490651,11.5646524],[-10.2477791,11.5659212],[-10.2472257,11.5660568],[-10.2466955,11.5655485],[-10.2464534,11.5649274],[-10.2447242,11.5624767],[-10.2459462,11.5599243],[-10.2457617,11.5588401],[-10.2447934,11.5572363],[-10.2439634,11.5570443],[-10.2430412,11.5572363],[-10.240459,11.5570895],[-10.2391842,11.5573183],[-10.237358,11.5574622],[-10.2369714,11.5570342],[-10.2383158,11.5541952],[-10.2379764,11.5474812],[-10.2374021,11.5471998],[-10.2342563,11.5475707],[-10.230732,11.5471487],[-10.2297009,11.5468034],[-10.2258365,11.5462221],[-10.2228189,11.5456071],[-10.2223924,11.5450876],[-10.2229342,11.5426141],[-10.2222771,11.5404455],[-10.2227843,11.5393499],[-10.2233146,11.5389885],[-10.2240178,11.5390224],[-10.2260697,11.5403326],[-10.2267844,11.5405359],[-10.2274069,11.5404907],[-10.2279256,11.5401631],[-10.2289631,11.5385367],[-10.2294127,11.5372378],[-10.2319257,11.5350127],[-10.2322255,11.5343463],[-10.2311869,11.5332689],[-10.2295885,11.5326205],[-10.2265853,11.5307053],[-10.2265853,11.5302564],[-10.2272063,11.529638],[-10.2282549,11.5293886],[-10.2292424,11.5288798],[-10.2293544,11.5275033],[-10.2289675,11.527194],[-10.2282636,11.5270917],[-10.2246573,11.5280185],[-10.2242287,11.5277144],[-10.224273,11.5270917],[-10.2258545,11.525658],[-10.2270221,11.5233698],[-10.2272143,11.5212554],[-10.2272734,11.5199085],[-10.226697,11.5185761],[-10.2262388,11.5184458],[-10.2256623,11.519141],[-10.2243026,11.520343],[-10.2226768,11.5208354],[-10.2213909,11.5210237],[-10.2199868,11.5210526],[-10.2193069,11.5213712],[-10.2188339,11.5223271],[-10.2160257,11.5244415],[-10.2156266,11.5241084],[-10.2142225,11.518721],[-10.213587,11.5184313],[-10.2118429,11.5181851],[-10.2111335,11.5184458],[-10.2106457,11.5189816],[-10.2106753,11.5196913],[-10.2111335,11.5209368],[-10.211636,11.5233263],[-10.2116065,11.5239491],[-10.2110448,11.524456],[-10.2096259,11.5245573],[-10.206729,11.5242966],[-10.2054875,11.5237898],[-10.2044123,11.522714],[-10.2005953,11.5167803],[-10.2000336,11.5168382],[-10.1996346,11.5172872],[-10.1990877,11.5189092],[-10.1982452,11.520314],[-10.1974028,11.5222112],[-10.1959543,11.5232394],[-10.1952892,11.5232684],[-10.1945798,11.5227615],[-10.1943299,11.521953],[-10.1944372,11.5208597],[-10.1944587,11.519472],[-10.1942656,11.5185048],[-10.1931498,11.5181684],[-10.1920554,11.5184207],[-10.1912761,11.5187519],[-10.190115,11.5187726],[-10.1891967,11.5184106],[-10.1890384,11.5181004],[-10.189165,11.5178211],[-10.1896189,11.5178935],[-10.1899461,11.5177177],[-10.1904105,11.5160215],[-10.1912339,11.5142839],[-10.191065,11.5138288],[-10.1904317,11.513653],[-10.1879195,11.5139529],[-10.1866951,11.5144184],[-10.1856607,11.5154009],[-10.1849113,11.5166731],[-10.184468,11.5167144],[-10.1836024,11.5158974],[-10.182473,11.5151941],[-10.1811009,11.5137874],[-10.179412,11.5131462],[-10.1788104,11.5133324],[-10.1783987,11.5139012],[-10.1780504,11.5152561],[-10.1785676,11.515825],[-10.1796442,11.517304],[-10.1796548,11.517728],[-10.1790531,11.5181728],[-10.1784726,11.5182658],[-10.1774171,11.517666],[-10.1755699,11.5157319],[-10.1744511,11.5137978],[-10.1736911,11.5133634],[-10.1730895,11.5134358],[-10.1726039,11.5144494],[-10.1709362,11.5155974],[-10.170562,11.5156011],[-10.1705926,11.5144749],[-10.1702555,11.5105108],[-10.1694893,11.5092044],[-10.16952,11.5086639],[-10.1706846,11.5070722],[-10.1719871,11.5032731],[-10.1717573,11.5015462],[-10.1713895,11.5010357],[-10.1700103,11.5011558],[-10.1674512,11.5009906],[-10.1648921,11.501351],[-10.1640646,11.5017415],[-10.1634363,11.5016814],[-10.1628694,11.5008484],[-10.1621491,11.4997893],[-10.1616281,11.4997143],[-10.1606934,11.5001948],[-10.1587166,11.5004951],[-10.1578891,11.5002849],[-10.1574753,11.4999245],[-10.1577358,11.4982577],[-10.1587625,11.4969062],[-10.1610458,11.4962605],[-10.1617507,11.4956298],[-10.161858,11.4950291],[-10.1610152,11.4944435],[-10.1593295,11.493122],[-10.1582568,11.4914401],[-10.1572914,11.4894279],[-10.1570922,11.4873856],[-10.1574447,11.4854934],[-10.1574294,11.4843071],[-10.1569083,11.4838565],[-10.1561268,11.4840518],[-10.1543492,11.484232],[-10.1538282,11.4839917],[-10.1531999,11.4828204],[-10.1498593,11.4786906],[-10.1476373,11.4767083],[-10.1462888,11.4761076],[-10.143791,11.4759123],[-10.1420441,11.4763779],[-10.141661,11.4770387],[-10.1419828,11.4787807],[-10.1420594,11.481619],[-10.1416303,11.48249],[-10.1408948,11.48255],[-10.1403738,11.4822046],[-10.1398681,11.4813637],[-10.1404504,11.479922],[-10.1404351,11.4783602],[-10.1401592,11.4775042],[-10.1390253,11.4759574],[-10.1377534,11.4747109],[-10.1369872,11.4745007],[-10.1320835,11.4759574],[-10.1272258,11.4785554],[-10.1270572,11.4792612],[-10.1274097,11.4810633],[-10.1273331,11.4815739],[-10.1267967,11.4815889],[-10.1238239,11.4794264],[-10.1194249,11.4772433],[-10.1183662,11.4767177],[-10.116697,11.4744678],[-10.1162463,11.4742628],[-10.1158762,11.4743312],[-10.1135749,11.4770439],[-10.1133335,11.47809],[-10.1134354,11.4787787],[-10.1141059,11.4797881],[-10.1142025,11.4802507],[-10.1140362,11.480645],[-10.1133657,11.4809814],[-10.1119655,11.4812653],[-10.10975,11.4818068],[-10.1089884,11.48175],[-10.1085592,11.4816659],[-10.1080443,11.4808037],[-10.1069659,11.4792098],[-10.1054263,11.4764919],[-10.1043856,11.4752354],[-10.1032323,11.4743837],[-10.1019288,11.473675],[-10.1011993,11.4733596],[-10.1007057,11.4733596],[-10.1001478,11.4738222],[-10.0996972,11.4745162],[-10.0992466,11.4749788],[-10.0989033,11.4752522],[-10.098281,11.4752522],[-10.0971652,11.4745162],[-10.0965,11.4737802],[-10.0965,11.472897],[-10.0970365,11.472224],[-10.0976373,11.471509],[-10.098354,11.4706963],[-10.0987424,11.4700785],[-10.0994054,11.4688983],[-10.1000298,11.4675445],[-10.1003088,11.4668926],[-10.1005319,11.4661645],[-10.1004997,11.465439],[-10.1002766,11.4646635],[-10.1001028,11.4642823],[-10.0997916,11.4640615],[-10.0994483,11.4639984],[-10.0990943,11.464072],[-10.0986672,11.464296],[-10.0980235,11.4649479],[-10.0973154,11.4654106],[-10.096779,11.4655998],[-10.0963284,11.4656419],[-10.0954486,11.4656839],[-10.0944615,11.465747],[-10.0938607,11.465726],[-10.0935389,11.4659153],[-10.0934101,11.4668616],[-10.0932599,11.4684598],[-10.0930453,11.4687542],[-10.0923673,11.4692663],[-10.0908781,11.4701842],[-10.0896765,11.4707099],[-10.0880028,11.4711095],[-10.0867368,11.471467],[-10.0860287,11.4718035],[-10.0852777,11.4723502],[-10.0847841,11.472918],[-10.0841833,11.4738433],[-10.0838829,11.4744741],[-10.0835181,11.4749368],[-10.0830031,11.4753573],[-10.0821234,11.4755676],[-10.080793,11.4754415],[-10.0798489,11.4746844],[-10.0786258,11.4733596],[-10.0778318,11.4723376],[-10.0776044,11.4718318],[-10.0773598,11.4708571],[-10.0771452,11.4699108],[-10.0767375,11.4685019],[-10.0763727,11.4673873],[-10.0759007,11.4667985],[-10.0740982,11.4663148],[-10.0729824,11.4662728],[-10.0719095,11.4665041],[-10.0695706,11.4670719],[-10.0681416,11.4675419],[-10.0672618,11.4677312],[-10.0662232,11.4680813],[-10.0656224,11.4680392],[-10.0655795,11.4674925],[-10.0657941,11.4668616],[-10.066352,11.465747],[-10.0665666,11.4650741],[-10.0664378,11.4646325],[-10.0659958,11.4645557],[-10.0653435,11.4647166],[-10.0643993,11.4652213],[-10.0637985,11.4655788],[-10.0627277,11.4660469],[-10.0626184,11.4656419],[-10.0621248,11.4653895],[-10.0616098,11.4653895],[-10.0598289,11.4655788],[-10.0579835,11.4658732],[-10.0555802,11.4665462],[-10.0535847,11.4669667],[-10.0530697,11.4670719],[-10.0527907,11.4668616],[-10.0527478,11.4662307],[-10.0528766,11.4655788],[-10.0537134,11.4646535],[-10.054443,11.4635389],[-10.0548507,11.4624875],[-10.0546361,11.4618566],[-10.0538422,11.4605527],[-10.0529624,11.4598587],[-10.0521256,11.4595222],[-10.0515891,11.459312],[-10.050645,11.4590386],[-10.0499583,11.458618],[-10.0490357,11.457945],[-10.0488425,11.4570617],[-10.0489069,11.4564729],[-10.0493361,11.4560102],[-10.0499798,11.455842],[-10.0508252,11.4558704],[-10.0513831,11.4558914],[-10.0519754,11.4560523],[-10.0524903,11.4563677],[-10.0530268,11.4567673],[-10.0536705,11.4571879],[-10.054443,11.45723],[-10.0548507,11.4567673],[-10.0549365,11.4563467],[-10.0545932,11.455842],[-10.0540997,11.4553793],[-10.0537778,11.4548115],[-10.0528337,11.4534656],[-10.0518466,11.4527716],[-10.0505591,11.4519934],[-10.0498296,11.4515939],[-10.047598,11.45029],[-10.0461389,11.4487127],[-10.0459028,11.4485234],[-10.0453664,11.4486706],[-10.0442506,11.4490071],[-10.0434352,11.4495118],[-10.0425554,11.4502269],[-10.0406672,11.4520145],[-10.0393153,11.4527716],[-10.0387789,11.4527505],[-10.0381781,11.4527085],[-10.0375558,11.4525823],[-10.0372125,11.4527295],[-10.0368262,11.4529819],[-10.0365258,11.4535076],[-10.0362898,11.4542647],[-10.0361396,11.4551901],[-10.0362254,11.4576085],[-10.0362254,11.4589965],[-10.0361181,11.4595853],[-10.0357104,11.4597746],[-10.0348521,11.4596905],[-10.0342728,11.4596274],[-10.0340367,11.4593961],[-10.0337792,11.4588493],[-10.033629,11.4579029],[-10.0338651,11.4569986],[-10.0340153,11.4557789],[-10.0339509,11.4550639],[-10.0336934,11.4546853],[-10.0324703,11.45376],[-10.0313974,11.4533814],[-10.0303117,11.4531154],[-10.0296808,11.453066],[-10.0285221,11.4529819],[-10.0281573,11.4525402],[-10.0280286,11.4521407],[-10.0283075,11.4519303],[-10.0287882,11.4518746],[-10.0292946,11.451699],[-10.029831,11.4514256],[-10.0303675,11.4511312],[-10.0314275,11.4508021],[-10.0327149,11.4502763],[-10.0330497,11.4500797],[-10.0329424,11.4497432],[-10.0328566,11.448923],[-10.0322772,11.4483762],[-10.0315262,11.4481448],[-10.030861,11.4480186],[-10.0301744,11.4479345],[-10.0294877,11.4479766],[-10.0280715,11.4479766],[-10.0258614,11.4476191],[-10.0252606,11.4472826],[-10.0247456,11.4464413],[-10.0236512,11.4440228],[-10.0226213,11.4418986],[-10.0215269,11.4404895],[-10.020733,11.4399848],[-10.0198318,11.4395852],[-10.0191237,11.4392487],[-10.0184585,11.4391225],[-10.0178577,11.4393749],[-10.0173427,11.4397955],[-10.0165702,11.4405316],[-10.0160767,11.4412887],[-10.0152184,11.4418776],[-10.0127507,11.4427609],[-10.011356,11.4428871],[-10.0105406,11.4429922],[-10.0098754,11.4431184],[-10.0092796,11.443164],[-10.0085021,11.4432236],[-10.0079228,11.4427609],[-10.0074721,11.4422562],[-10.0073863,11.4416252],[-10.0076438,11.4404054],[-10.00803,11.4391856],[-10.0089184,11.4383938],[-10.0093175,11.438134],[-10.0104762,11.4378185],[-10.0113989,11.437461],[-10.011871,11.4371666],[-10.0124289,11.4367249],[-10.0139738,11.4352527],[-10.0156261,11.4337594],[-10.018716,11.4311515],[-10.0198103,11.4302261],[-10.0198532,11.4297844],[-10.019703,11.4286486],[-10.0193597,11.4274708],[-10.0185658,11.4270712],[-10.0179435,11.4270712],[-10.0171496,11.4270712],[-10.0157763,11.4270502],[-10.0152613,11.4270081],[-10.0142828,11.4261952],[-10.0126649,11.4238322],[-10.0113774,11.4223599],[-10.0104333,11.4214976],[-10.0096823,11.4212452],[-10.0091244,11.4212031],[-10.0082661,11.42114],[-10.0076438,11.4211611],[-10.007043,11.4213924],[-10.0061632,11.421771],[-10.0050689,11.4219183],[-10.0048114,11.42175],[-10.0043608,11.4211611],[-10.0042008,11.4205767],[-10.0041247,11.4202987],[-10.0041462,11.4197939],[-10.0045196,11.4193596],[-10.0049831,11.4189316],[-10.0059057,11.4180482],[-10.0067211,11.4170807],[-10.0072361,11.41666],[-10.0079871,11.4151877],[-10.0080944,11.414746],[-10.0079442,11.4135261],[-10.0075365,11.4126006],[-10.0071932,11.4112755],[-10.0065709,11.4090459],[-10.0063993,11.4073632],[-10.0063778,11.4061643],[-10.0063349,11.4054912],[-10.0056697,11.4048392],[-10.0043822,11.4035561],[-10.0037385,11.4029882],[-10.0028802,11.4024834],[-10.0018931,11.4018523],[-10.0005628,11.4006955],[-10.0005628,11.4002327],[-10.0010348,11.4000224],[-10.0015284,11.399833],[-10.0023652,11.3997068],[-10.0034038,11.4001139],[-10.0040904,11.4004925],[-10.0046612,11.4007796],[-10.0051762,11.4007796],[-10.0069014,11.4007659],[-10.0085322,11.4010394],[-10.0093604,11.4010741],[-10.0102187,11.4011172],[-10.0111929,11.4017545],[-10.0116221,11.4027642],[-10.0124374,11.4042786],[-10.0130941,11.404693],[-10.0139601,11.4049279],[-10.0143926,11.4049501],[-10.0148944,11.4046206],[-10.0152199,11.4043832],[-10.0156215,11.4042493],[-10.0159908,11.4042675],[-10.0163448,11.4047593],[-10.0179218,11.4064668],[-10.0185952,11.4074148],[-10.0189761,11.4082771],[-10.0190672,11.4087188],[-10.0191397,11.4091922],[-10.0193674,11.4095927],[-10.0201787,11.4101044],[-10.0207008,11.410191],[-10.0216727,11.4100493],[-10.0235763,11.4095769],[-10.0245723,11.4091911],[-10.0252631,11.4086163],[-10.0257048,11.4080416],[-10.0263065,11.4067864],[-10.0270549,11.4048144],[-10.0279453,11.4032369],[-10.0281841,11.4026822],[-10.0282243,11.4021747],[-10.0281251,11.4016094],[-10.0278837,11.4007679],[-10.0275807,11.4001606],[-10.0274786,11.3997793],[-10.0274599,11.3994297],[-10.027492,11.3988644],[-10.027425,11.3986172],[-10.0272909,11.3984148],[-10.0269691,11.3980992],[-10.0267626,11.3979389],[-10.0261483,11.3976076],[-10.0253996,11.3971918],[-10.0248153,11.3970146],[-10.0244866,11.3969607],[-10.0242573,11.3968031],[-10.0240749,11.3965638],[-10.0239703,11.3960484],[-10.0240454,11.3956092],[-10.0242063,11.3953937],[-10.0244518,11.3951997],[-10.0251908,11.3949004],[-10.0258012,11.3948296],[-10.0271756,11.3950361],[-10.0287009,11.3952834],[-10.0291712,11.3953227],[-10.0296621,11.3953819],[-10.0301261,11.3954831],[-10.0307214,11.3956304],[-10.0327811,11.3960343],[-10.0334317,11.3959477],[-10.0340341,11.3957036],[-10.0350463,11.3949713],[-10.0367886,11.3935479],[-10.0376808,11.392987],[-10.038741,11.3924438],[-10.0405081,11.3915068],[-10.0415844,11.3911525],[-10.0438977,11.3905225],[-10.0446607,11.3902077],[-10.0454317,11.3896565],[-10.0460663,11.3889544],[-10.0464518,11.3882077],[-10.0468576,11.3875792],[-10.0471151,11.3866116],[-10.047142,11.385686],[-10.0470158,11.3848368],[-10.0467249,11.3839399],[-10.0464164,11.3832801],[-10.0463828,11.3831249],[-10.0464204,11.3829198],[-10.0465304,11.382749],[-10.0466752,11.3825464],[-10.0468066,11.3822941],[-10.0468335,11.3819943],[-10.0467718,11.3818128],[-10.0466834,11.3816682],[-10.0465062,11.3815078],[-10.0462595,11.381396],[-10.0459041,11.3812555],[-10.0457472,11.3811489],[-10.045609,11.3810188],[-10.0454749,11.3806625],[-10.0454722,11.3804442],[-10.0455017,11.3802063],[-10.0457069,11.3795358],[-10.0458062,11.3786549],[-10.0458089,11.3778082],[-10.0457376,11.3772785],[-10.0455728,11.3764514],[-10.0453771,11.3753101],[-10.0453824,11.3738324],[-10.0453985,11.3727911],[-10.0454682,11.3717656],[-10.0455809,11.3707926],[-10.0457419,11.3702035],[-10.0462675,11.3691518],[-10.0470462,11.3678763],[-10.0478447,11.3661856],[-10.0482738,11.3652284],[-10.0490786,11.3637662],[-10.0509077,11.3603688],[-10.0519485,11.3587646],[-10.0533996,11.3568831],[-10.0553435,11.3549143],[-10.0572712,11.3527015],[-10.0588776,11.3504336],[-10.0606688,11.3480237],[-10.061599,11.3471782],[-10.062492,11.3465511],[-10.0629562,11.3461894],[-10.0634719,11.3457479],[-10.0638897,11.345543],[-10.0648213,11.3452281],[-10.0655765,11.3452595],[-10.0662511,11.3452202],[-10.0674559,11.3450548],[-10.0682993,11.3448501],[-10.0691989,11.3444406],[-10.0700664,11.3438026],[-10.0714318,11.3423458],[-10.0718816,11.3418732],[-10.0725001,11.3416134],[-10.0729982,11.3416999],[-10.0734398,11.3419441],[-10.073986,11.3425663],[-10.074725,11.3437633],[-10.0755844,11.345866],[-10.0758736,11.3467953],[-10.0759006,11.3474464],[-10.0756247,11.3487403],[-10.075231,11.349646],[-10.0745564,11.3508036],[-10.0734479,11.3520873],[-10.0723314,11.3531426],[-10.0712311,11.3539851],[-10.0695437,11.355141],[-10.0690877,11.3556302],[-10.0686372,11.3564873],[-10.0682938,11.3570134],[-10.0676808,11.3574501],[-10.0659458,11.3590645],[-10.064741,11.3598756],[-10.0628374,11.3609544],[-10.0623154,11.3613717],[-10.0620021,11.3618915],[-10.0618994,11.3626461],[-10.061862,11.3639924],[-10.0616688,11.3652757],[-10.0615615,11.3662329],[-10.0614238,11.3672856],[-10.061084,11.3690098],[-10.0608213,11.3701047],[-10.0604082,11.3725175],[-10.0603437,11.3735957],[-10.0604886,11.3745266],[-10.0609821,11.3770341],[-10.0615025,11.3800591],[-10.0616849,11.3816156],[-10.0617493,11.3820626],[-10.0616808,11.3830108],[-10.0612953,11.3846406],[-10.060733,11.3863573],[-10.0606046,11.3870265],[-10.0606446,11.3874518],[-10.0609659,11.3880738],[-10.0613193,11.388373],[-10.0619961,11.3887834],[-10.0626773,11.3890885],[-10.0631332,11.3892304],[-10.0637448,11.3892147],[-10.0643992,11.3890254],[-10.0649518,11.3887572],[-10.0653863,11.3883944],[-10.0661641,11.387553],[-10.0666255,11.3869166],[-10.066867,11.3863223],[-10.0673605,11.3842503],[-10.0675428,11.3822205],[-10.0674462,11.3801432],[-10.0674382,11.3792123],[-10.0675508,11.3788126],[-10.0677649,11.3784821],[-10.068208,11.378171],[-10.0686962,11.3781131],[-10.0693506,11.3782762],[-10.0704075,11.3786522],[-10.0715822,11.3789046],[-10.0724968,11.3790454],[-10.0732124,11.3790266],[-10.0736738,11.379011],[-10.0741249,11.3788836],[-10.0744335,11.3786837],[-10.0747499,11.378334],[-10.0752783,11.3778634],[-10.0760803,11.3772822],[-10.0763941,11.3770693],[-10.0771719,11.376751],[-10.0779123,11.3764039],[-10.078851,11.3758412],[-10.0794303,11.3756152],[-10.0799239,11.3755048],[-10.0811524,11.3752996],[-10.0819731,11.3751839],[-10.0825042,11.3751208],[-10.0835314,11.3751682],[-10.0848645,11.3751997],[-10.085449,11.3751257],[-10.0860931,11.3750156],[-10.0877452,11.3745423],[-10.0911088,11.373969],[-10.0925812,11.3736246],[-10.0933296,11.3733144],[-10.0939143,11.3729173],[-10.0942308,11.3725701],[-10.0943649,11.3722704],[-10.0944293,11.3718838],[-10.0944829,11.3714946],[-10.0945902,11.3711318],[-10.0949926,11.3706558],[-10.0959384,11.3700876],[-10.0969381,11.3696539],[-10.0994611,11.3690466],[-10.1007485,11.3688099],[-10.101682,11.3687941],[-10.102771,11.3690097],[-10.1035917,11.3694989],[-10.1046539,11.3703245],[-10.1056141,11.3711976],[-10.1064939,11.3725648],[-10.107792,11.3747527],[-10.1087362,11.3763041],[-10.1095463,11.3772349],[-10.1106459,11.3782394],[-10.1116812,11.3791229],[-10.1123223,11.3794911],[-10.113017,11.3797381],[-10.1134435,11.3799432],[-10.1137626,11.3802641],[-10.1140148,11.3808426],[-10.1143849,11.3814684],[-10.1145673,11.3815],[-10.1149052,11.3814421],[-10.1152486,11.3811616],[-10.1158678,11.3803899],[-10.1169702,11.3789436],[-10.1177323,11.3777976],[-10.1185155,11.3768458],[-10.1199247,11.3755789],[-10.1232861,11.3730987],[-10.1253558,11.3719888],[-10.1267182,11.3716418],[-10.1283361,11.3710363],[-10.129655,11.3701155],[-10.1323793,11.3673232],[-10.1336709,11.3657448],[-10.1350861,11.3640971],[-10.1356876,11.3630391],[-10.1361831,11.361426],[-10.1365899,11.3594661],[-10.1366961,11.3580437],[-10.1365368,11.3570898],[-10.1360238,11.3558583],[-10.1351747,11.3548002],[-10.1325563,11.3527361],[-10.1293542,11.3507414],[-10.1285148,11.3500708],[-10.1281205,11.3498289],[-10.1279032,11.3495843],[-10.1276404,11.3492294],[-10.1270342,11.3485036],[-10.1264495,11.3479512],[-10.1259774,11.3475569],[-10.1249744,11.3470466],[-10.1245397,11.3468889],[-10.1243171,11.3467206],[-10.1238775,11.3464343],[-10.1235554,11.3461499],[-10.1234213,11.345908],[-10.1233864,11.3455372],[-10.1234706,11.345064],[-10.1237892,11.3445782],[-10.1242071,11.3441855],[-10.1248683,11.3437761],[-10.1254344,11.3435462],[-10.1266994,11.3432816],[-10.1277785,11.3431039],[-10.128641,11.3430996],[-10.1303548,11.3432072],[-10.1319404,11.3431733],[-10.1329135,11.3431862],[-10.1343951,11.343273],[-10.1353652,11.3434544],[-10.1368564,11.3438383],[-10.1383585,11.3441328],[-10.139689,11.3444852],[-10.1412338,11.3452795],[-10.1433689,11.3460052],[-10.144431,11.3462525],[-10.1452652,11.3462735],[-10.1459679,11.3461762],[-10.1464051,11.3460473],[-10.1467431,11.3460553],[-10.1471321,11.3461656],[-10.1473546,11.3463708],[-10.1476121,11.3466416],[-10.1478428,11.3467258],[-10.1486013,11.3468549],[-10.1495964,11.3469417],[-10.1528372,11.3474747],[-10.1541944,11.3479225],[-10.1582225,11.3500075],[-10.1598801,11.3506759],[-10.1607995,11.3509765],[-10.16145,11.3510439],[-10.1624195,11.3511236],[-10.1629888,11.3511419],[-10.1637205,11.3514241],[-10.1643398,11.3518656],[-10.1648526,11.3522704],[-10.1650152,11.3526016],[-10.1650715,11.3529082],[-10.1649402,11.353503],[-10.1645899,11.3541653],[-10.1640583,11.3550055],[-10.1629324,11.3563485],[-10.1621006,11.357213],[-10.1613812,11.3579613],[-10.1609308,11.3586543],[-10.1605118,11.359568],[-10.1601052,11.3601996],[-10.1596112,11.3607146],[-10.1587979,11.3612176],[-10.1576783,11.3619166],[-10.1552015,11.3636152],[-10.1535251,11.3648785],[-10.1522117,11.3658289],[-10.1509293,11.3665342],[-10.1497847,11.3669941],[-10.1487465,11.3675091],[-10.148196,11.367963],[-10.1477143,11.3685517],[-10.1472202,11.3692446],[-10.14682,11.3700785],[-10.1464383,11.3710045],[-10.1462757,11.3718078],[-10.1462444,11.3725559],[-10.1460757,11.3748983],[-10.1460756,11.3756955],[-10.146282,11.3767318],[-10.1467011,11.3779029],[-10.1470513,11.3785285],[-10.1474579,11.3790313],[-10.1481897,11.379577],[-10.1486963,11.3798959],[-10.1491029,11.3800492],[-10.1499349,11.3803495],[-10.1510857,11.3806746],[-10.1524681,11.381116],[-10.153475,11.3815883],[-10.1540255,11.3819255],[-10.1543257,11.3823118],[-10.1546384,11.3826184],[-10.1551951,11.3829189],[-10.1557956,11.3830845],[-10.156296,11.3830722],[-10.1568214,11.3828698],[-10.1579973,11.3822873],[-10.1588167,11.3816251],[-10.1596866,11.3811934],[-10.159855,11.38111],[-10.1602428,11.380969],[-10.1607308,11.3809014],[-10.161181,11.3810548],[-10.1617877,11.381527],[-10.1622443,11.3817171],[-10.1628574,11.3817844],[-10.1637705,11.3816925],[-10.1643522,11.3815638],[-10.1648902,11.3813001],[-10.1657658,11.3811284],[-10.1663663,11.3810609],[-10.166823,11.380883],[-10.1672107,11.3805152],[-10.1683116,11.3800369],[-10.1699378,11.3791662],[-10.1717956,11.3779826],[-10.1734782,11.3771671],[-10.17603,11.3760696],[-10.1770121,11.3755729],[-10.1779566,11.3748737],[-10.1789511,11.3739234],[-10.1793076,11.3733899],[-10.1795765,11.3731875],[-10.1799707,11.3731384],[-10.1805273,11.3732672],[-10.1810026,11.3736229],[-10.1814781,11.3742912],[-10.1820347,11.3753705],[-10.1824725,11.3766582],[-10.1832295,11.3798958],[-10.1837611,11.3818886],[-10.1842614,11.3831519],[-10.1845554,11.3836731],[-10.1849057,11.3841514],[-10.1852872,11.38455],[-10.1858502,11.3849363],[-10.1869635,11.3859419],[-10.1872889,11.3864814],[-10.1874702,11.3872418],[-10.1874577,11.3880144],[-10.1873263,11.3889157],[-10.1866509,11.3926805],[-10.1866758,11.3937413],[-10.1867509,11.3946243],[-10.1870825,11.3960283],[-10.1874326,11.3971198],[-10.1875577,11.3978495],[-10.1875391,11.3987139],[-10.1876828,11.4001059],[-10.1879017,11.4008907],[-10.1881144,11.4012218],[-10.1886398,11.401559],[-10.1890778,11.402123],[-10.1894029,11.4028282],[-10.1897219,11.4039625],[-10.1897344,11.4043427],[-10.1895718,11.4046308],[-10.189503,11.4049251],[-10.1896594,11.4052501],[-10.1901973,11.4057529],[-10.1905976,11.4059613],[-10.1911105,11.4060778],[-10.1916923,11.406231],[-10.1926805,11.4067216],[-10.1932934,11.4067094],[-10.1939815,11.4068749],[-10.1944193,11.4068381],[-10.1949447,11.4065377],[-10.1955327,11.4057529],[-10.1960956,11.4045695],[-10.1965461,11.4036681],[-10.1970151,11.4024971],[-10.1975441,11.4009784],[-10.1980806,11.3997689],[-10.1986852,11.398389],[-10.1992543,11.3969972],[-10.1995983,11.3964208],[-10.2000549,11.3960284],[-10.2007305,11.3957585],[-10.2026632,11.395078],[-10.206191,11.3942747],[-10.2077109,11.3939927],[-10.2089118,11.3940295],[-10.2101504,11.3941827],[-10.2117303,11.3941842],[-10.2126771,11.3941054],[-10.2139163,11.3938581],[-10.2143724,11.393724],[-10.2151716,11.3933455],[-10.2157046,11.3928829],[-10.2160353,11.3925855],[-10.2163732,11.3924331],[-10.2169472,11.3924541],[-10.2175374,11.3925802],[-10.2178967,11.392959],[-10.2183366,11.3937898],[-10.2190341,11.3949835],[-10.2195075,11.3959671],[-10.2196701,11.3968255],[-10.2198015,11.3981744],[-10.2196139,11.3994926],[-10.2192511,11.4009765],[-10.218807,11.4019637],[-10.2183566,11.4029324],[-10.2180064,11.404128],[-10.2175998,11.4054463],[-10.2172308,11.406838],[-10.2171182,11.4077823],[-10.2172245,11.4082728],[-10.2174872,11.4088124],[-10.2180878,11.409315],[-10.2203697,11.4104989],[-10.222266,11.4114611],[-10.2226549,11.411653],[-10.2231647,11.4118633],[-10.223878,11.4123577],[-10.2245781,11.4128572],[-10.2248704,11.4132068],[-10.2249725,11.4134487],[-10.225085,11.4138852],[-10.2251549,11.4140902],[-10.2253621,11.4144224],[-10.2258549,11.4148005],[-10.2264487,11.4149855],[-10.2274663,11.4149618],[-10.2292013,11.4143457],[-10.2307888,11.413646],[-10.231576,11.4132989],[-10.2340919,11.4123314],[-10.2356477,11.4116845],[-10.2365756,11.4114533],[-10.2375627,11.4113691],[-10.238716,11.4114848],[-10.2395031,11.4117076],[-10.2407272,11.4120858],[-10.2426828,11.4125564],[-10.2441381,11.4129814],[-10.2448946,11.4133679],[-10.2455798,11.413922],[-10.2461323,11.4143296],[-10.2466419,11.4146292],[-10.2469451,11.4148027],[-10.247106,11.4150525],[-10.2472508,11.4152419],[-10.2476263,11.4154548],[-10.2478597,11.4155258],[-10.248152,11.4155521],[-10.2486938,11.4155468],[-10.2490667,11.4155837],[-10.2493697,11.4157493],[-10.2496621,11.4160831],[-10.2498364,11.4162015],[-10.2500162,11.4162225],[-10.250169,11.4162172],[-10.2503648,11.4161567],[-10.250625,11.4160306],[-10.2509335,11.4156862],[-10.2512714,11.415234],[-10.2513948,11.4148607],[-10.2515772,11.4143348],[-10.2521164,11.4136512],[-10.2540191,11.4116323],[-10.254188,11.4111542],[-10.2542444,11.4105839],[-10.2540879,11.4099034],[-10.2537877,11.4088611],[-10.253425,11.4081191],[-10.2528557,11.4071933],[-10.2519863,11.4063228],[-10.2511043,11.405826],[-10.2499785,11.4054336],[-10.2491466,11.4051025],[-10.2484336,11.4046182],[-10.2474327,11.403674],[-10.2463695,11.4025335],[-10.2457377,11.4020308],[-10.2445258,11.4014095],[-10.2430934,11.4009468],[-10.2419883,11.4006787],[-10.2414156,11.4002404],[-10.2412131,11.3997584],[-10.2412668,11.3993745],[-10.2416158,11.3989098],[-10.2422404,11.3984122],[-10.2426159,11.3979389],[-10.2430129,11.397204],[-10.2433322,11.3969081],[-10.2440831,11.3964165],[-10.244582,11.3960984],[-10.2449629,11.3958643],[-10.2452472,11.3957355],[-10.2456013,11.3956986],[-10.2460519,11.3956513],[-10.2465186,11.3955752],[-10.2478516,11.3952544],[-10.2489406,11.3949914],[-10.2507726,11.3948336],[-10.2525455,11.3947101],[-10.253731,11.394505],[-10.254297,11.3942946],[-10.2547583,11.3940081],[-10.2553577,11.3934895],[-10.2559393,11.3926496],[-10.2566975,11.3916889],[-10.2571455,11.3911868],[-10.2578408,11.3907672],[-10.2581973,11.3905035],[-10.2585476,11.3901602],[-10.2586301,11.3899574],[-10.2586636,11.3897367],[-10.2586212,11.389377],[-10.2586039,11.3889461],[-10.2587666,11.3883022],[-10.2593282,11.3874381],[-10.2604783,11.3866663],[-10.2615927,11.3863368],[-10.2631402,11.3862276],[-10.2636982,11.3863381],[-10.2640897,11.3864802],[-10.2644942,11.3868744],[-10.2657767,11.38834],[-10.2670348,11.38983],[-10.268231,11.3917863],[-10.2691753,11.3926802],[-10.2707922,11.3937336],[-10.2719687,11.394358],[-10.2728798,11.395147],[-10.2738484,11.3961854],[-10.2742643,11.3967425],[-10.2743994,11.3969506],[-10.2746954,11.3974059],[-10.2750885,11.3983255],[-10.2762331,11.4006922],[-10.2772239,11.4020648],[-10.2789841,11.4040852],[-10.2792353,11.4044322],[-10.2802888,11.4058214],[-10.281077,11.4071947],[-10.2815398,11.4078202],[-10.2822779,11.4082862],[-10.2830785,11.4085069],[-10.2848049,11.4085681],[-10.2868064,11.4089361],[-10.2879573,11.4090219],[-10.2887704,11.4088134],[-10.2891207,11.4084456],[-10.2910097,11.4059562],[-10.2921188,11.4045121],[-10.2935491,11.4028538],[-10.2952004,11.4004135],[-10.2955633,11.3994324],[-10.2964264,11.39606],[-10.2969392,11.3935707],[-10.2972396,11.3905661],[-10.2975522,11.3887513],[-10.2980026,11.3875249],[-10.2989409,11.3856485],[-10.2994162,11.3843977],[-10.2996413,11.3831959],[-10.2995539,11.3819694],[-10.2990659,11.38013],[-10.2986782,11.3777752],[-10.2983153,11.3744641],[-10.2979928,11.3736404],[-10.2978274,11.3732131],[-10.2977809,11.3729382],[-10.2978238,11.3726675],[-10.2981152,11.3721338],[-10.2995002,11.3702352],[-10.3001668,11.3693866],[-10.3007922,11.3688961],[-10.3016054,11.3684792],[-10.3039197,11.3678904],[-10.30482,11.3677001],[-10.3071096,11.3672159],[-10.3087753,11.3670007],[-10.3104115,11.3666221],[-10.312965,11.3658121],[-10.3145529,11.3650084],[-10.3152535,11.3648488],[-10.3168672,11.3648366],[-10.3182683,11.3646649],[-10.3196318,11.3642357],[-10.3206201,11.3638555],[-10.3211296,11.3638241],[-10.3216125,11.3638925],[-10.3239834,11.3646026],[-10.3260619,11.3649837],[-10.3287014,11.3652168],[-10.3298398,11.3653762],[-10.3303777,11.3657565],[-10.3307905,11.3664065],[-10.3309781,11.3672037],[-10.3306997,11.368426],[-10.3299327,11.3702561],[-10.3292137,11.3712081],[-10.3272076,11.3728173],[-10.3264833,11.3733012],[-10.3253728,11.3738271],[-10.3227228,11.3745423],[-10.3212504,11.3748683],[-10.3204536,11.3752549],[-10.320054,11.3756808],[-10.3195846,11.3763935],[-10.3189167,11.377327],[-10.3184983,11.3775584],[-10.3178492,11.3778345],[-10.3173208,11.3781973],[-10.3169078,11.3786812],[-10.316079,11.3799223],[-10.3157437,11.3805612],[-10.3155775,11.3811291],[-10.3153253,11.3822573],[-10.3151053,11.3827831],[-10.3150597,11.3830907],[-10.3150785,11.3833985],[-10.3152072,11.3840873],[-10.3152609,11.3848131],[-10.3152019,11.3857018],[-10.3146386,11.3869272],[-10.3144348,11.3873793],[-10.3143328,11.3878316],[-10.3141881,11.3887834],[-10.3141151,11.3897323],[-10.3141776,11.3907134],[-10.3144278,11.3918048],[-10.3145904,11.3931415],[-10.3145154,11.3944046],[-10.3142777,11.3961828],[-10.3139627,11.4009416],[-10.3140003,11.4013359],[-10.3141022,11.4017146],[-10.3145742,11.4025822],[-10.3148049,11.403371],[-10.3148317,11.4042965],[-10.3147782,11.4056479],[-10.3146708,11.4070046],[-10.3145404,11.4080777],[-10.3139734,11.4100651],[-10.313673,11.4117162],[-10.31348,11.413525],[-10.3133082,11.4157441],[-10.3131259,11.417311],[-10.3126645,11.418715],[-10.3126002,11.4193932],[-10.3126264,11.4200212],[-10.312871,11.4205185],[-10.313386,11.4210444],[-10.3139573,11.4213467],[-10.3151053,11.4216175],[-10.317868,11.4231357],[-10.3184688,11.4234788],[-10.3188014,11.4235998],[-10.319252,11.4235367],[-10.3196704,11.4232265],[-10.3200513,11.4226954],[-10.3206253,11.4216123],[-10.3207487,11.4211784],[-10.3208132,11.4206815],[-10.3209418,11.4194931],[-10.321253,11.4188674],[-10.3229643,11.4169692],[-10.3230929,11.4164118],[-10.3231306,11.4159228],[-10.3229696,11.4145819],[-10.3228757,11.4137011],[-10.3228865,11.4131779],[-10.3231996,11.4118454],[-10.3233075,11.4112376],[-10.3237824,11.4100335],[-10.32441,11.4089135],[-10.3247881,11.4079432],[-10.3249706,11.4069309],[-10.3249867,11.4053956],[-10.3241874,11.3997688],[-10.3237475,11.3954147],[-10.3236885,11.3913708],[-10.3242481,11.388549],[-10.3247774,11.3876738],[-10.3252978,11.3869903],[-10.32614,11.3863014],[-10.326789,11.3860488],[-10.3275294,11.3858858],[-10.3297235,11.3858964],[-10.3305817,11.3860541],[-10.3312845,11.3864222],[-10.3316599,11.3867903],[-10.331998,11.3874424],[-10.3332049,11.3909185],[-10.3335698,11.3917179],[-10.3350771,11.3932691],[-10.3355921,11.3939948],[-10.3360641,11.3951202],[-10.3365792,11.3957645],[-10.3382796,11.3968503],[-10.3390038,11.3972342],[-10.3398247,11.3978443],[-10.3404899,11.3984595],[-10.3418791,11.3990536],[-10.3429146,11.3992325],[-10.3446473,11.3992061],[-10.3465301,11.398959],[-10.3471122,11.3987803],[-10.3477183,11.3983069],[-10.3479784,11.3978966],[-10.3479946,11.3974918],[-10.3478874,11.3970396],[-10.3475761,11.3958248],[-10.3471954,11.394171],[-10.3472489,11.3933191],[-10.3474636,11.3915917],[-10.3479008,11.3903295],[-10.3480402,11.3900692],[-10.3481823,11.3899088],[-10.3486196,11.3894409],[-10.3494385,11.3882741],[-10.3496361,11.3876738],[-10.3498722,11.3868639],[-10.3502585,11.3849551],[-10.3504837,11.3836455],[-10.3508324,11.3827673],[-10.3524926,11.3794542],[-10.3527179,11.3789914],[-10.3528387,11.3786365],[-10.3529245,11.3781158],[-10.3529836,11.3776451],[-10.3529888,11.3757203],[-10.352828,11.3739059],[-10.3524309,11.3731854],[-10.3519964,11.3728015],[-10.351637,11.3725701],[-10.351181,11.3723913],[-10.3508109,11.3722177],[-10.350548,11.3720284],[-10.3503281,11.3718233],[-10.3502101,11.3715761],[-10.3497327,11.3705296],[-10.3479625,11.3677317],[-10.3470826,11.3668481],[-10.3465516,11.3662014],[-10.3461492,11.3652546],[-10.3454063,11.3630195],[-10.3444515,11.3610235],[-10.3434617,11.3599218],[-10.3432471,11.3594431],[-10.3431345,11.3587122],[-10.3432793,11.3572394],[-10.3448243,11.3528006],[-10.3452105,11.3511332],[-10.3454922,11.3504496],[-10.3461466,11.3494792],[-10.3481261,11.3462997],[-10.3487027,11.3458001],[-10.349207,11.3454951],[-10.3509612,11.3447271],[-10.3538498,11.3437489],[-10.3560413,11.3425103],[-10.3567447,11.3416178],[-10.3579349,11.3406352],[-10.3584124,11.3404222],[-10.3587958,11.3404248],[-10.3592224,11.3406168],[-10.359614,11.3409691],[-10.3598232,11.3415451],[-10.3598769,11.3420159],[-10.3598634,11.3423893],[-10.3597964,11.3426996],[-10.359791,11.3429547],[-10.3598286,11.3430994],[-10.3599359,11.3433123],[-10.3608585,11.3454792],[-10.3621728,11.3483721],[-10.3626664,11.3496816],[-10.3632886,11.3513804],[-10.3634013,11.3526481],[-10.3635354,11.3532476],[-10.3640182,11.3536263],[-10.3644903,11.3537841],[-10.3650374,11.3536947],[-10.3664773,11.3528455],[-10.3671671,11.3524719],[-10.3680415,11.3521983],[-10.3687872,11.3521589],[-10.3703241,11.3523639],[-10.3716008,11.3526928],[-10.372038,11.3528716],[-10.3723518,11.3531082],[-10.3728802,11.3538025],[-10.3734569,11.354381],[-10.3739048,11.3547255],[-10.3744573,11.3548833],[-10.3747658,11.354907],[-10.3755088,11.3548097],[-10.3758226,11.3547018],[-10.376351,11.3543732],[-10.3767131,11.3540997],[-10.3769169,11.3540313],[-10.3773354,11.3540024],[-10.3783492,11.3540734],[-10.3802938,11.3538893],[-10.3818871,11.3536316],[-10.3828071,11.3535764],[-10.3831665,11.3535947],[-10.383424,11.3537289],[-10.383601,11.3538341],[-10.3837753,11.3540655],[-10.3839738,11.3542496],[-10.3843574,11.3544941],[-10.3853873,11.3548912],[-10.3857199,11.3549833],[-10.3858996,11.354978],[-10.3860981,11.354907],[-10.3863556,11.3547334],[-10.3867982,11.3546046],[-10.3871978,11.3546151],[-10.3878174,11.3547361],[-10.3883753,11.3548937],[-10.3886623,11.35507],[-10.3888152,11.3552751],[-10.3890647,11.3554145],[-10.3897567,11.355567],[-10.3934849,11.3563034],[-10.3948931,11.3564454],[-10.395797,11.3564926],[-10.3969264,11.3562338],[-10.3976316,11.3558537],[-10.3981305,11.3554908],[-10.3982861,11.3551831],[-10.3983961,11.3548544],[-10.3984095,11.3542521],[-10.3981302,11.352987],[-10.3979401,11.3526165],[-10.3976799,11.3523877],[-10.3970415,11.3520906],[-10.396422,11.3516645],[-10.3961752,11.3513279],[-10.3958594,11.3504182],[-10.3950031,11.3477461],[-10.3929378,11.3437278],[-10.3917254,11.3415714],[-10.3913392,11.3409508],[-10.3908081,11.3404353],[-10.389408,11.3396042],[-10.3879274,11.3389942],[-10.3865917,11.3385734],[-10.385193,11.3382415],[-10.3827776,11.3379317],[-10.3818522,11.3377424],[-10.3815598,11.3375819],[-10.3812849,11.3373584],[-10.3806774,11.336459],[-10.380605,11.3361381],[-10.3805916,11.3357884],[-10.3807364,11.3355226],[-10.3812702,11.33496],[-10.381584,11.3345655],[-10.381769,11.3340132],[-10.3821499,11.3325982],[-10.3822733,11.3309467],[-10.3823216,11.3293635],[-10.3824611,11.3289269],[-10.3826456,11.3285307],[-10.3831799,11.328038],[-10.3838022,11.3276803],[-10.3851325,11.3272778],[-10.3858809,11.3272227],[-10.3868009,11.3272674],[-10.3872649,11.3273331],[-10.3876404,11.3275199],[-10.388394,11.3281274],[-10.3902207,11.3297212],[-10.3906445,11.3300894],[-10.3909637,11.3302891],[-10.3919185,11.3306022],[-10.3930236,11.3309704],[-10.3938309,11.3313858],[-10.3951184,11.3321433],[-10.3955449,11.3326036],[-10.3959955,11.3333768],[-10.3966714,11.3341498],[-10.3975082,11.3348653],[-10.397975,11.3351756],[-10.3986133,11.3353334],[-10.3990264,11.3351388],[-10.399241,11.3348232],[-10.3993322,11.3343972],[-10.3991766,11.3314306],[-10.3994555,11.3298105],[-10.3995092,11.328656],[-10.3994341,11.3277145],[-10.3992866,11.3272332],[-10.3989781,11.3265021],[-10.3987957,11.326026],[-10.3987555,11.3249083],[-10.3989218,11.3243692],[-10.3991524,11.3239458],[-10.400346,11.3227544],[-10.4011775,11.3215418],[-10.4014618,11.320574],[-10.4016871,11.3185963],[-10.4017891,11.3179743],[-10.4021538,11.3172944],[-10.4024945,11.3166343],[-10.4031355,11.315982],[-10.4035244,11.3158216],[-10.4040743,11.3158373],[-10.4052706,11.3162924],[-10.4070247,11.317013],[-10.4074767,11.3171286],[-10.4079903,11.3171287],[-10.4087065,11.3170998],[-10.4095085,11.316934],[-10.4106243,11.3165133],[-10.411563,11.3162344],[-10.4118581,11.316245],[-10.412027,11.3162845],[-10.4122255,11.3164265],[-10.4123623,11.3167184],[-10.4125112,11.3171392],[-10.4125353,11.3172851],[-10.4125192,11.3174166],[-10.4124361,11.3176612],[-10.4124079,11.3179597],[-10.4124669,11.3181991],[-10.4126118,11.3184437],[-10.4128398,11.3187856],[-10.412947,11.319088],[-10.4129765,11.3193827],[-10.4128156,11.3210659],[-10.4129497,11.3215366],[-10.4132314,11.3219732],[-10.4137839,11.3224045],[-10.4139126,11.3225596],[-10.4139824,11.3227675],[-10.414154,11.3242666],[-10.4144303,11.3264205],[-10.4145832,11.3279065],[-10.4147602,11.3289137],[-10.4150097,11.3296645],[-10.4153396,11.330042],[-10.4157821,11.3303259],[-10.4161174,11.3305207],[-10.4164299,11.3305378],[-10.4166807,11.3304497],[-10.4169489,11.330247],[-10.4170884,11.3300998],[-10.417193,11.3298499],[-10.4172761,11.3296422],[-10.417362,11.3294817],[-10.4174612,11.3293818],[-10.4177267,11.3292635],[-10.4185743,11.3290742],[-10.4192932,11.3287217],[-10.4198028,11.3283377],[-10.4200817,11.3280117],[-10.4203607,11.3274067],[-10.4204894,11.3266019],[-10.4204331,11.3258892],[-10.420366,11.325379],[-10.4204197,11.3251055],[-10.4205538,11.3248084],[-10.4214228,11.3238983],[-10.4233272,11.3209501],[-10.4237671,11.3203873],[-10.4245074,11.3196587],[-10.4249097,11.3191065],[-10.4252074,11.3185253],[-10.4254274,11.3182385],[-10.4256151,11.3180886],[-10.4261033,11.3177598],[-10.4277019,11.3164949],[-10.4297216,11.3144328],[-10.4305155,11.3137174],[-10.4308427,11.3134886],[-10.4312504,11.3132888],[-10.4316367,11.3132624],[-10.4321356,11.3132729],[-10.4327525,11.3134729],[-10.4338093,11.3139411],[-10.4354991,11.3144565],[-10.4370011,11.3148773],[-10.4380418,11.3153035],[-10.4393829,11.3159504],[-10.4407937,11.3165237],[-10.4422153,11.3167709],[-10.4431916,11.3168447],[-10.4452221,11.3168051],[-10.4480625,11.3163897],[-10.4495002,11.3162344],[-10.4499857,11.3161267],[-10.4503236,11.315953],[-10.4507018,11.3156927],[-10.451359,11.3150036],[-10.4516486,11.3146853],[-10.452,11.3142461],[-10.4525472,11.3131362],[-10.4527725,11.3125156],[-10.4529441,11.3111899],[-10.4529924,11.3104115],[-10.4530568,11.3101247],[-10.4532338,11.3098723],[-10.4540868,11.30912],[-10.4552803,11.3083073],[-10.4558704,11.3080128],[-10.4562781,11.3078759],[-10.4566,11.3078917],[-10.4567851,11.3079918],[-10.4569835,11.3083231],[-10.4570434,11.3085819],[-10.4578471,11.3086756],[-10.4583299,11.3085967],[-10.458582,11.3083126],[-10.4586411,11.3078392],[-10.4591614,11.3071659],[-10.4601592,11.3067293],[-10.4605749,11.3068214],[-10.4607171,11.3068371],[-10.4608297,11.3065689],[-10.461106,11.3063243],[-10.4616907,11.3063716],[-10.4619938,11.3062059],[-10.4622486,11.3054484],[-10.462541,11.305117],[-10.4629111,11.3049513],[-10.4630292,11.304783],[-10.4630935,11.3046567],[-10.4633403,11.3045094],[-10.4633832,11.3041097],[-10.4633939,11.3038046],[-10.4634583,11.3036573],[-10.4638016,11.3038151],[-10.4639733,11.3037835],[-10.4640162,11.3036257],[-10.4640591,11.3033522],[-10.4642093,11.3030892],[-10.4645097,11.3029313],[-10.4648852,11.3030365],[-10.4652822,11.3030892],[-10.4656148,11.3029945],[-10.4659152,11.3025526],[-10.4661405,11.3020371],[-10.4663015,11.3018793],[-10.4664946,11.3015847],[-10.4666287,11.3016005],[-10.4667413,11.3014637],[-10.4667145,11.3012743],[-10.4665965,11.3011218],[-10.4665107,11.3010376],[-10.4665214,11.3009166],[-10.4666072,11.3008745],[-10.4667038,11.3008377],[-10.4666609,11.3006378],[-10.4668111,11.3005694],[-10.4669935,11.3003748],[-10.4669023,11.3003327],[-10.4668272,11.3002012],[-10.4668433,11.2998961],[-10.466913,11.2997856],[-10.4671866,11.3001065],[-10.4675353,11.2999697],[-10.4675567,11.299733],[-10.4674977,11.2995647],[-10.4673851,11.2992964],[-10.4673797,11.2991649],[-10.4674977,11.2990176],[-10.4673368,11.2987388],[-10.4671598,11.2985021],[-10.4671061,11.2984021],[-10.4671115,11.2983232],[-10.4671276,11.2982022],[-10.4671168,11.2980917],[-10.4671705,11.2979655],[-10.467208,11.2978813],[-10.4672617,11.2978077],[-10.4673851,11.2977656],[-10.4675299,11.2976814],[-10.4676211,11.297613],[-10.4677337,11.2974395],[-10.4677123,11.2972501],[-10.4676855,11.296966],[-10.4676962,11.2967872],[-10.4676747,11.2966346],[-10.4676479,11.2964873],[-10.4676265,11.2963032],[-10.4676426,11.2961506],[-10.4677606,11.2955509],[-10.467664,11.2953879],[-10.4674709,11.2952195],[-10.4673958,11.2949565],[-10.467428,11.2947776],[-10.467546,11.2945462],[-10.4678249,11.2944094],[-10.4680288,11.2942937],[-10.4682434,11.2941569],[-10.4684258,11.2940096],[-10.4685438,11.2938097],[-10.4686511,11.293452],[-10.4687798,11.2932731],[-10.4689729,11.292968],[-10.469048,11.292726],[-10.4691875,11.2924314],[-10.4691982,11.2920948],[-10.4692948,11.2919264],[-10.4693699,11.2917686],[-10.4693377,11.2915687],[-10.4692948,11.2914319],[-10.4694021,11.2913267],[-10.4695094,11.2912215],[-10.4696596,11.2909374],[-10.469724,11.2907481],[-10.469842,11.2905902],[-10.4699385,11.2903272],[-10.4699922,11.2900537],[-10.4700995,11.2898222],[-10.4701209,11.2896433],[-10.4701638,11.2894434],[-10.4702282,11.289212],[-10.4703677,11.2889489],[-10.4703784,11.2885702],[-10.4703999,11.2884123],[-10.4705286,11.2882861],[-10.4706037,11.2880862],[-10.4703891,11.2877916],[-10.4703462,11.287518],[-10.4706895,11.2873813],[-10.4708719,11.2869814],[-10.4704535,11.2869814],[-10.4702067,11.2869604],[-10.4701531,11.2866342],[-10.4700458,11.2863502],[-10.4699707,11.286245],[-10.4699922,11.286003],[-10.4700995,11.2858241],[-10.470078,11.2854664],[-10.4700136,11.2850771],[-10.4700244,11.284793],[-10.4702819,11.2846036],[-10.4704213,11.284288],[-10.4700029,11.2840986],[-10.4699278,11.2839618],[-10.4700244,11.2837198],[-10.4701424,11.2835304],[-10.4701102,11.2833305],[-10.4699063,11.2831517],[-10.470078,11.2827834],[-10.4701424,11.2825519],[-10.4701638,11.2822994],[-10.4699814,11.2820574],[-10.4697669,11.2818575],[-10.4695845,11.2816471],[-10.4694021,11.2814472],[-10.4691339,11.2813314],[-10.4691661,11.2810053],[-10.4688871,11.280637],[-10.468694,11.2802793],[-10.4686511,11.2800162],[-10.4686725,11.2793429],[-10.4684687,11.2789956],[-10.4682863,11.2785748],[-10.4679215,11.2782696],[-10.4676318,11.2779645],[-10.4675138,11.2776699],[-10.4672456,11.2776384],[-10.4670632,11.2771964],[-10.4669345,11.2768597],[-10.466795,11.2763126],[-10.4667413,11.2760706],[-10.4669666,11.2757971],[-10.4668915,11.2753551],[-10.4668057,11.2749869],[-10.4667628,11.2746397],[-10.4668486,11.2745029],[-10.4669774,11.2743977],[-10.4669774,11.2741346],[-10.4668486,11.2737032],[-10.4667628,11.2734928],[-10.4665911,11.2731035],[-10.4664838,11.2727142],[-10.4664517,11.2725037],[-10.4665053,11.2722828],[-10.466634,11.2720723],[-10.4667842,11.2718303],[-10.4669023,11.2717041],[-10.4670096,11.2716199],[-10.4671812,11.2712727],[-10.4673743,11.2709886],[-10.4675353,11.2707045],[-10.4675675,11.2702731],[-10.4676748,11.2699574],[-10.4677606,11.2695366],[-10.4678035,11.2692209],[-10.4679966,11.2687369],[-10.468061,11.2684212],[-10.4536844,11.2443668],[-10.4535021,11.2441353],[-10.4532982,11.2439669],[-10.4529549,11.2437565],[-10.4524828,11.2435776],[-10.452,11.2438406],[-10.4516674,11.2440406],[-10.451131,11.2441248],[-10.4505302,11.2437565],[-10.4502512,11.2435671],[-10.4499723,11.2433671],[-10.4497684,11.2430409],[-10.4496826,11.242641],[-10.4493285,11.242378],[-10.4491354,11.2419465],[-10.4486955,11.2412836],[-10.4483415,11.2409153],[-10.4479231,11.240547],[-10.4474403,11.2402628],[-10.4470326,11.2399892],[-10.4468287,11.2397156],[-10.4467858,11.2393999],[-10.4467322,11.2392211],[-10.4466141,11.2388001],[-10.4462601,11.2383687],[-10.4457773,11.2381898],[-10.4449404,11.2378846],[-10.4448224,11.2378531],[-10.4444255,11.2377583],[-10.4439856,11.2377478],[-10.4433418,11.2377163],[-10.4431487,11.2375584],[-10.4426552,11.2374006],[-10.4417647,11.2369691],[-10.4414321,11.2370112],[-10.4409922,11.2367902],[-10.4405738,11.2364219],[-10.4404236,11.2361904],[-10.4399837,11.2359799],[-10.439458,11.23558],[-10.4387177,11.2354748],[-10.4383637,11.2351591],[-10.4381169,11.234675],[-10.4379023,11.2341699],[-10.4374303,11.2338332],[-10.4368509,11.2339174],[-10.4361428,11.2338542],[-10.4353596,11.2338542],[-10.4344798,11.2336964],[-10.4340721,11.2334333],[-10.4338146,11.2332544],[-10.43301,11.2329703],[-10.4319371,11.2329703],[-10.43095,11.2327072],[-10.4303814,11.2324757],[-10.4293407,11.2324862],[-10.428536,11.2320442],[-10.4276777,11.2319285],[-10.427152,11.231939],[-10.4267658,11.2319811],[-10.4263581,11.2319916],[-10.4260791,11.23196],[-10.4259289,11.2321916],[-10.4257895,11.2325493],[-10.4252852,11.2327177],[-10.425135,11.2325704],[-10.424899,11.232623],[-10.4249848,11.2323915],[-10.4255105,11.2319706],[-10.4258324,11.2313602],[-10.4262401,11.2307288],[-10.4263259,11.2303921],[-10.4264761,11.2300764],[-10.4266692,11.2296975],[-10.4267551,11.2291714],[-10.4268194,11.2286662],[-10.4271199,11.2279927],[-10.4272915,11.2272561],[-10.4275705,11.2268772],[-10.4279567,11.2263721],[-10.4281713,11.2259091],[-10.4280211,11.225004],[-10.4283751,11.2247725],[-10.4285039,11.2244568],[-10.4288901,11.224541],[-10.4294373,11.2244358],[-10.4298772,11.2242042],[-10.4300488,11.2240359],[-10.4303707,11.223878],[-10.4307462,11.2236465],[-10.4314221,11.2230887],[-10.4315723,11.2228046],[-10.431862,11.2226152],[-10.4320551,11.2225731],[-10.432377,11.222552],[-10.4327632,11.2224573],[-10.4332675,11.2225204],[-10.4335679,11.2223836],[-10.4337932,11.2221626],[-10.4340829,11.2220048],[-10.4343725,11.2219522],[-10.4346837,11.2216575],[-10.4347802,11.2214155],[-10.4349546,11.2213603],[-10.4352764,11.221163],[-10.4354749,11.2209709],[-10.4359014,11.2207578],[-10.4366122,11.2206394],[-10.4369099,11.2204158],[-10.4372237,11.2202264],[-10.4374571,11.2199791],[-10.437787,11.2198422],[-10.4386051,11.2197053],[-10.4388384,11.2195712],[-10.4389725,11.2193581],[-10.4392032,11.2191134],[-10.4394795,11.2187424],[-10.4398791,11.2186424],[-10.4401487,11.2184793],[-10.440445,11.2184056],[-10.4404719,11.2182675],[-10.4407843,11.2182557],[-10.4411599,11.2182938],[-10.4413543,11.2182649],[-10.4419685,11.2179242],[-10.4422314,11.2180031],[-10.4427222,11.2175111],[-10.4430334,11.2172717],[-10.443197,11.2171086],[-10.4438112,11.216685],[-10.4440875,11.2163719],[-10.4443691,11.2163798],[-10.4449646,11.2161456],[-10.4452516,11.2159641],[-10.4455439,11.2158457],[-10.4456566,11.2157378],[-10.4457531,11.2154905],[-10.4459436,11.2152406],[-10.4460294,11.2150512],[-10.4463245,11.2150248],[-10.4464371,11.2149117],[-10.4466034,11.2146749],[-10.4465524,11.2145013],[-10.4469119,11.2143118],[-10.447518,11.2141145],[-10.4476816,11.2138541],[-10.4478694,11.2137067],[-10.4480411,11.2136988],[-10.4483817,11.2135752],[-10.4486458,11.2132925],[-10.4487009,11.2127753],[-10.4490603,11.2125175],[-10.4495592,11.2124596],[-10.4497898,11.212344],[-10.4501894,11.2118493],[-10.4507178,11.2116046],[-10.4508331,11.2114126],[-10.4508251,11.2110548],[-10.4509163,11.2109285],[-10.4511791,11.2108337],[-10.4514527,11.2108653],[-10.4517102,11.2110311],[-10.4520214,11.21116],[-10.4522252,11.2110969],[-10.4523647,11.2108706],[-10.4523808,11.210418],[-10.4525632,11.2100708],[-10.4531157,11.2098234],[-10.4533786,11.2094709],[-10.4533786,11.2082185],[-10.4537112,11.2075292],[-10.4541189,11.2072555],[-10.4550791,11.2058084],[-10.4557067,11.2053296],[-10.4561815,11.2044455],[-10.4567206,11.2041798],[-10.4575494,11.2035352],[-10.4578042,11.202859],[-10.4582468,11.2025196],[-10.4584104,11.2018618],[-10.4585794,11.2016908],[-10.4590219,11.2016013],[-10.4591855,11.2015145],[-10.4594323,11.2009514],[-10.4595747,11.2008405],[-10.4598963,11.2008041],[-10.4602316,11.2004778],[-10.4603577,11.200191],[-10.4603738,11.1992991],[-10.4604784,11.1990518],[-10.4607198,11.1988676],[-10.4611731,11.1984282],[-10.4612052,11.1982361],[-10.4611006,11.1979546],[-10.461098,11.1978309],[-10.4613662,11.1975047],[-10.4615834,11.1967863],[-10.4616505,11.1959707],[-10.4617953,11.1955655],[-10.4618812,11.1949419],[-10.4617605,11.1943078],[-10.4618061,11.1938789],[-10.462085,11.1935237],[-10.4622754,11.1928896],[-10.4622138,11.192287],[-10.4624203,11.191866],[-10.4624257,11.191674],[-10.4627368,11.1913766],[-10.4627395,11.1912714],[-10.4626456,11.1911004],[-10.4623988,11.1910398],[-10.4621896,11.1909451],[-10.4620636,11.1906873],[-10.462077,11.1902242],[-10.4626322,11.1893269],[-10.4630935,11.1890322],[-10.4631901,11.1889243],[-10.4633752,11.1884744],[-10.4633752,11.1882455],[-10.463182,11.1879745],[-10.4630774,11.1874666],[-10.4631472,11.1872114],[-10.4636836,11.1866352],[-10.4642147,11.1853116],[-10.4645205,11.1851538],[-10.4650301,11.1844591],[-10.4655263,11.1835645],[-10.4656282,11.1829225],[-10.4659823,11.1824304],[-10.4665267,11.182112],[-10.4666233,11.1819226],[-10.4666179,11.1815779],[-10.4671007,11.1804069],[-10.4677069,11.1802122],[-10.4679161,11.1799017],[-10.4681093,11.1787703],[-10.4680073,11.1784019],[-10.4680663,11.178023],[-10.4692358,11.1771704],[-10.4693484,11.1768704],[-10.4692733,11.1765494],[-10.4693699,11.1763652],[-10.46974,11.1761231],[-10.4698044,11.1758442],[-10.4695523,11.175339],[-10.469563,11.1747496],[-10.4694772,11.1736497],[-10.469209,11.1735497],[-10.4680181,11.1734444],[-10.4674763,11.1735076],[-10.4672241,11.173476],[-10.4665375,11.173076],[-10.4659796,11.1724498],[-10.464558,11.1715261],[-10.4641718,11.1707288],[-10.4637909,11.1704973],[-10.4635227,11.1705078],[-10.4597141,11.1694973],[-10.4590274,11.168971],[-10.4583622,11.1683184],[-10.4578902,11.1678553],[-10.4573752,11.1667606],[-10.4568173,11.166508],[-10.4562165,11.1656028],[-10.4554011,11.1649923],[-10.4545857,11.1641713],[-10.4537274,11.1636871],[-10.4534699,11.1636449],[-10.4529656,11.1630766],[-10.4526652,11.1626976],[-10.4518927,11.1622134],[-10.4511417,11.1619819],[-10.4504765,11.161424],[-10.4497577,11.1612451],[-10.4496008,11.161178],[-10.4489208,11.1608872],[-10.4480196,11.1604767],[-10.4476334,11.160803],[-10.4467965,11.1604872],[-10.4460455,11.1601504],[-10.4461957,11.1594977],[-10.4457773,11.159203],[-10.445434,11.1592135],[-10.4452623,11.1594346],[-10.4441572,11.1595188],[-10.4432346,11.1587188],[-10.4414107,11.1590346],[-10.4408957,11.1590557],[-10.4396726,11.1578346],[-10.4398443,11.1568452],[-10.4390074,11.1560873],[-10.4378701,11.1556452],[-10.4366471,11.1548242],[-10.4359819,11.1538137],[-10.4357244,11.1529084],[-10.4353596,11.1526558],[-10.4348661,11.1520874],[-10.4342867,11.1513926],[-10.4341901,11.1509611],[-10.4339112,11.1505189],[-10.4337717,11.1502453],[-10.4336537,11.1499505],[-10.4334069,11.14954],[-10.4332675,11.1489505],[-10.4328276,11.1486768],[-10.4326345,11.1478242],[-10.4322697,11.1470452],[-10.4319264,11.1465505],[-10.43198,11.1460873],[-10.4314114,11.1452873],[-10.4310466,11.1448557],[-10.4305853,11.1440873],[-10.4301239,11.1439189],[-10.4294802,11.143182],[-10.4282356,11.143182],[-10.4279567,11.1430978],[-10.4276456,11.1427083],[-10.4271842,11.1427925],[-10.4269589,11.1424031],[-10.4266049,11.1425715],[-10.4258431,11.1421399],[-10.4253389,11.1420557],[-10.4248495,11.1419786],[-10.4244698,11.1419188],[-10.4240085,11.1419504],[-10.4230965,11.1416241],[-10.4224635,11.1415925],[-10.4217769,11.1411925],[-10.4209186,11.1405714],[-10.4208542,11.1396661],[-10.4202105,11.1385503],[-10.419971,11.1382779],[-10.4197596,11.1380374],[-10.4194702,11.1377082],[-10.4191698,11.1374345],[-10.4186548,11.1365292],[-10.4182471,11.1362976],[-10.4180325,11.1359291],[-10.4173352,11.1352659],[-10.4164767,11.1338449],[-10.4161871,11.1331501],[-10.4156077,11.1326659],[-10.4152644,11.1321395],[-10.4148674,11.1318132],[-10.4141164,11.1314974],[-10.4134889,11.1313816],[-10.4132957,11.1314237],[-10.4131777,11.131529],[-10.41299,11.13145],[-10.4127486,11.1312763],[-10.4123248,11.1306605],[-10.4122497,11.1303131],[-10.4121102,11.1299447],[-10.4121263,11.1297762],[-10.4119439,11.1291657],[-10.4119171,11.1286972],[-10.4118152,11.1283393],[-10.4117508,11.127755],[-10.4116328,11.1274761],[-10.4116167,11.1272392],[-10.4117454,11.126697],[-10.4119654,11.1263444],[-10.4120458,11.1262865],[-10.4120297,11.1261707],[-10.4120941,11.1260444],[-10.4121048,11.1257128],[-10.4120619,11.1255706],[-10.4120887,11.1253811],[-10.4119332,11.1249811],[-10.4118688,11.1247179],[-10.4116435,11.1241547],[-10.4116542,11.1239705],[-10.4116006,11.1238494],[-10.4114933,11.1230494],[-10.4114504,11.1229283],[-10.4114075,11.1225177],[-10.4114021,11.1218545],[-10.411504,11.1215703],[-10.4114557,11.1212492],[-10.4115094,11.1209913],[-10.411445,11.1207597],[-10.4112841,11.1204017],[-10.411048,11.1194859],[-10.4109944,11.1182647],[-10.4111982,11.1173382],[-10.4112948,11.1170856],[-10.4113806,11.1165276],[-10.4117454,11.115338],[-10.4120566,11.1145379],[-10.4123677,11.1140852],[-10.4126037,11.1138326],[-10.4127968,11.1135483],[-10.4131187,11.1134852],[-10.4135264,11.113243],[-10.413977,11.1127903],[-10.4142238,11.1126535],[-10.4148246,11.1120113],[-10.4151679,11.1120113],[-10.4696483,11.1156947],[-10.4701339,11.1156137],[-10.4704756,11.1154479],[-10.4713164,11.1149167],[-10.4719691,11.1142349],[-10.4726857,11.1134262],[-10.473006,11.1129014],[-10.4732992,11.1126084],[-10.474263,11.1121928],[-10.474643,11.1119957],[-10.4748891,11.1118223],[-10.4750964,11.1115266],[-10.4753421,11.1113627],[-10.4758316,11.1111951],[-10.4764747,11.1109257],[-10.4770103,11.1108296],[-10.4784143,11.1110506],[-10.4794389,11.111677],[-10.4798976,11.111877],[-10.4806566,11.1125798],[-10.4821239,11.1136403],[-10.4824511,11.1137877],[-10.482663,11.113943],[-10.482832,11.1141167],[-10.4831485,11.1143115],[-10.4833389,11.1143799],[-10.4838512,11.1143352],[-10.484039,11.1143667],[-10.4841946,11.1144483],[-10.484393,11.114372],[-10.4846639,11.1143509],[-10.4851628,11.1146799],[-10.4852165,11.1148431],[-10.4856537,11.1154458],[-10.4856698,11.1156379],[-10.4858602,11.1160117],[-10.4870618,11.1165381],[-10.487373,11.1166065],[-10.4878987,11.1164328],[-10.4884298,11.1164117],[-10.4888053,11.1166749],[-10.4891969,11.1164907],[-10.4896877,11.1163486],[-10.4899962,11.1164828],[-10.4903154,11.1164696],[-10.4905501,11.1163709],[-10.4907687,11.1165696],[-10.490892,11.1167302],[-10.4911442,11.1167512],[-10.4912179,11.1168618],[-10.4913829,11.1168776],[-10.4915203,11.1169684],[-10.4915539,11.1170401],[-10.4916987,11.1171039],[-10.4919971,11.1171171],[-10.4922278,11.1172197],[-10.4924799,11.1174513],[-10.4926542,11.1176948],[-10.4927669,11.1177816],[-10.4929506,11.1178737],[-10.493074,11.1179014],[-10.4932564,11.1180395],[-10.4933396,11.1180566],[-10.4934602,11.118004],[-10.4935729,11.1182619],[-10.4937231,11.1183922],[-10.4939149,11.1186863],[-10.4940014,11.1187218],[-10.4941053,11.1188238],[-10.4943172,11.1189304],[-10.4948456,11.1189791],[-10.4951581,11.1190949],[-10.4955349,11.1193041],[-10.4960446,11.1197147],[-10.496243,11.1199792],[-10.4963611,11.1200121],[-10.4965998,11.1200226],[-10.4968023,11.1201858],[-10.4970383,11.1204635],[-10.4974903,11.1205648],[-10.4975546,11.1206582],[-10.4975412,11.1207714],[-10.4976123,11.1207872],[-10.4978363,11.1209675],[-10.4979141,11.1209517],[-10.4979489,11.1209859],[-10.4982386,11.1210833],[-10.4984036,11.1213386],[-10.4988649,11.1213978],[-10.4989574,11.1214873],[-10.4992203,11.1215202],[-10.4996307,11.121711],[-10.4998587,11.1217754],[-10.4999673,11.1218834],[-10.5000531,11.1218886],[-10.5002248,11.1218241],[-10.5002731,11.1219149],[-10.5005225,11.1221347],[-10.5006808,11.1221465],[-10.5008229,11.1222071],[-10.5009409,11.1224045],[-10.501134,11.1224584],[-10.5012078,11.1225584],[-10.5013419,11.1226018],[-10.5014707,11.1226979],[-10.5015847,11.1227716],[-10.5018301,11.1231216],[-10.5023396,11.1231598],[-10.5026186,11.1233493],[-10.5029619,11.1235177],[-10.5041421,11.1234651],[-10.504657,11.1235283],[-10.505569,11.1239809],[-10.5061483,11.1241704],[-10.5069852,11.1245178],[-10.5079186,11.1251073],[-10.5087876,11.1257811],[-10.5099571,11.126918],[-10.5105794,11.1273075],[-10.5116415,11.1279181],[-10.5123818,11.1281497],[-10.5130792,11.1284866],[-10.5145168,11.129255],[-10.5152249,11.1294972],[-10.5160296,11.1299182],[-10.5164695,11.1303077],[-10.5169952,11.1305078],[-10.5177033,11.1306867],[-10.5186474,11.1306867],[-10.5190659,11.1308236],[-10.5193877,11.1311815],[-10.5206537,11.1313183],[-10.5445147,11.1450031],[-10.5461454,11.1448136],[-10.5477977,11.14494],[-10.5491924,11.1451926],[-10.5520034,11.1462768],[-10.553323,11.1476137],[-10.5542886,11.1490137],[-10.5558121,11.1503716],[-10.5563271,11.1513716],[-10.5580866,11.1539294],[-10.5593956,11.1557821],[-10.5605221,11.1582241],[-10.562464,11.1602451],[-10.5645883,11.1621608],[-10.5664122,11.1635713],[-10.5693197,11.1656448],[-10.5715084,11.1669342],[-10.5724686,11.1676053],[-10.57293,11.1682368],[-10.5731419,11.1686157],[-10.5736488,11.1701551],[-10.5740082,11.1712077],[-10.5745769,11.1721707],[-10.5760615,11.1741324],[-10.5763806,11.1744166],[-10.576673,11.1747126],[-10.576964,11.1749981],[-10.5772403,11.1753363],[-10.577479,11.1756428],[-10.5776238,11.1757915],[-10.5778022,11.1759915],[-10.5780114,11.1761586],[-10.5782314,11.1763362],[-10.5785331,11.1767717],[-10.5788188,11.1773045],[-10.5788458,11.1773409],[-10.5788725,11.1773768],[-10.5793566,11.1780282],[-10.5796194,11.1783808],[-10.5797052,11.1787703],[-10.5801237,11.1794018],[-10.5805475,11.1798965],[-10.5806869,11.1801438],[-10.5807138,11.1807858],[-10.5807996,11.1812437],[-10.580923,11.1814647],[-10.5809552,11.18167],[-10.5808961,11.1818699],[-10.5809766,11.1819857],[-10.5810088,11.182212],[-10.5808854,11.1824015],[-10.5809337,11.1826067],[-10.5810785,11.1828488],[-10.581336,11.1831224],[-10.581454,11.183354],[-10.5815989,11.1834908],[-10.5818296,11.1834908],[-10.5824304,11.1838171],[-10.5827576,11.1841592],[-10.5831063,11.1842013],[-10.5834603,11.1841697],[-10.5835944,11.1842749],[-10.5842543,11.1844748],[-10.5852467,11.1849854],[-10.5865073,11.184917],[-10.5871403,11.1849275],[-10.5873978,11.1847907],[-10.5876607,11.1845537],[-10.5880362,11.1845169],[-10.5883527,11.1846222],[-10.5884332,11.1847064],[-10.5888516,11.1858485],[-10.5892351,11.1860129],[-10.5893719,11.1865036],[-10.5899985,11.1867739],[-10.5898869,11.1870062],[-10.5895141,11.1870641],[-10.5894068,11.1872693],[-10.5894229,11.1874035],[-10.5896696,11.1876429],[-10.5897126,11.1879087],[-10.589852,11.1880929],[-10.5898011,11.1882429],[-10.5895489,11.1884139],[-10.5895034,11.1885323],[-10.5895463,11.1887138],[-10.5896992,11.1888296],[-10.5900237,11.1889059],[-10.590139,11.1890927],[-10.5901766,11.1896664],[-10.5901068,11.1898505],[-10.5897635,11.1899532],[-10.5896348,11.19009],[-10.5896267,11.1903189],[-10.5900237,11.1911898],[-10.5897528,11.1916424],[-10.5897823,11.1921265],[-10.5895194,11.1926765],[-10.5894576,11.1929756],[-10.5894926,11.1932316],[-10.5896535,11.1934191],[-10.5899624,11.1935373],[-10.5905425,11.1933599],[-10.5908015,11.1934158],[-10.5910403,11.194442],[-10.5913864,11.1950156],[-10.591346,11.1952076],[-10.5912583,11.1953408],[-10.590544,11.1958102],[-10.5898199,11.1961996],[-10.5893424,11.1966811],[-10.5889079,11.1969837],[-10.5891305,11.197702],[-10.5894149,11.1987307],[-10.5895491,11.1993675],[-10.5897583,11.2000673],[-10.5906595,11.2012987],[-10.5921319,11.2031826],[-10.592773,11.2038457],[-10.5932907,11.2042114],[-10.5936689,11.204406],[-10.5944977,11.2053005],[-10.594723,11.2056611],[-10.5949992,11.206011],[-10.5956591,11.2063293],[-10.5963805,11.2064188],[-10.5969707,11.2063188],[-10.5978371,11.2059241],[-10.598513,11.2057979],[-10.599103,11.2057742],[-10.5995295,11.2058584],[-10.5998702,11.2059795],[-10.6003476,11.2062767],[-10.6015922,11.2069819],[-10.6021983,11.2071397],[-10.6027079,11.2071555],[-10.6033731,11.2069766],[-10.6040759,11.2066714],[-10.6048967,11.2064135],[-10.605991,11.206203],[-10.6086463,11.2060242],[-10.6099499,11.205982],[-10.610717,11.2060558],[-10.6114411,11.2060873],[-10.6123048,11.2058979],[-10.6139842,11.2049486],[-10.6145419,11.2046034],[-10.614869,11.2041982],[-10.6151661,11.203504],[-10.6152019,11.2018329],[-10.6153251,11.2009514],[-10.6155236,11.2002409],[-10.6161619,11.1991516],[-10.6163336,11.1986203],[-10.6164998,11.1979204],[-10.6166045,11.1965915],[-10.6166662,11.1947787],[-10.6169666,11.192258],[-10.6171596,11.1914003],[-10.6176264,11.1904162],[-10.6183399,11.189269],[-10.6190641,11.188248],[-10.620625,11.1869062],[-10.6212684,11.1863047],[-10.6219071,11.1859405],[-10.6224651,11.185709],[-10.6230444,11.1856432],[-10.6234039,11.1856379],[-10.6238329,11.1857274],[-10.6252627,11.1861588],[-10.6262792,11.1863851],[-10.6276632,11.1869429],[-10.6293584,11.1876428],[-10.6308603,11.1881481],[-10.6314183,11.1885691],[-10.6317134,11.1890269],[-10.6320191,11.19019],[-10.6321854,11.1904872],[-10.633607,11.1915107],[-10.6352534,11.1930769],[-10.6368579,11.1942156],[-10.637751,11.1951812],[-10.6379951,11.195505],[-10.6382097,11.1956392],[-10.6385368,11.1957207],[-10.63976,11.1954628],[-10.6404413,11.195326],[-10.640985,11.1950994],[-10.6415187,11.1947803],[-10.6427203,11.1933991],[-10.6433379,11.1929162],[-10.6443712,11.1923241],[-10.6453029,11.191879],[-10.6464655,11.1909687],[-10.6473695,11.1899059],[-10.647525,11.1896769],[-10.647584,11.189498],[-10.6475921,11.1892321],[-10.6468849,11.1876165],[-10.6466243,11.1867612],[-10.6465594,11.1863115],[-10.6465003,11.1857774],[-10.646318,11.1850617],[-10.6460525,11.1845958],[-10.6451243,11.1836908],[-10.6445075,11.1829697],[-10.6439548,11.1823789],[-10.643263,11.1818225],[-10.6424298,11.1810556],[-10.6419967,11.1809393],[-10.6411714,11.1808385],[-10.6400466,11.1809179],[-10.6380043,11.1812297],[-10.6373084,11.1814016],[-10.6366165,11.1814146],[-10.6357823,11.1811962],[-10.6352779,11.1807885],[-10.6351572,11.1804911],[-10.6351815,11.180149],[-10.6353504,11.179399],[-10.635404,11.1780177],[-10.6353934,11.1771703],[-10.6353022,11.1764809],[-10.6350607,11.1757127],[-10.6348006,11.1750468],[-10.6347309,11.174618],[-10.6347148,11.1743074],[-10.6347604,11.173918],[-10.6347549,11.1735734],[-10.6347201,11.1732496],[-10.6347496,11.1729207],[-10.6349775,11.1726471],[-10.6351895,11.1724761],[-10.6354068,11.1723812],[-10.6356401,11.172334],[-10.6358761,11.1723919],[-10.6368149,11.1731391],[-10.6377081,11.1736917],[-10.6383277,11.1741601],[-10.639119,11.1751021],[-10.6396929,11.1757283],[-10.6399558,11.1758626],[-10.6401999,11.1759231],[-10.640966,11.1760083],[-10.6415807,11.1762466],[-10.6419165,11.17646],[-10.6423054,11.176773],[-10.6427748,11.1773966],[-10.6433595,11.1781123],[-10.6441265,11.1788887],[-10.6445629,11.1793231],[-10.6448589,11.1795832],[-10.6450171,11.1796254],[-10.6451727,11.1796307],[-10.6454812,11.1795622],[-10.6458352,11.1794465],[-10.6459747,11.179407],[-10.6461651,11.179386],[-10.6465057,11.1794281],[-10.6469456,11.1794728],[-10.6473051,11.1794675],[-10.6479193,11.1793439],[-10.6484772,11.1791701],[-10.6491263,11.1788333],[-10.6503655,11.1780913],[-10.6508643,11.1779125],[-10.651433,11.1778492],[-10.6525112,11.1778176],[-10.6534312,11.1777019],[-10.6543229,11.1774717],[-10.6565136,11.1765209],[-10.6569637,11.1762416],[-10.6574916,11.1759796],[-10.6581836,11.1758512],[-10.6593705,11.1759423],[-10.660582,11.1761362],[-10.6610004,11.1762468],[-10.6613384,11.1764072],[-10.6624276,11.1774707],[-10.6629745,11.1778124],[-10.6632132,11.1778546],[-10.66345,11.1778423],[-10.6648211,11.1773369],[-10.6657307,11.1769003],[-10.666043,11.1768547],[-10.6662763,11.1768861],[-10.6667296,11.177123],[-10.6671668,11.1773835],[-10.6679647,11.1777043],[-10.6684652,11.1779591],[-10.6686152,11.17809],[-10.6687037,11.1782598],[-10.6687332,11.1784439],[-10.6687413,11.1788755],[-10.6688056,11.1791438],[-10.6689237,11.1793255],[-10.6692236,11.1795794],[-10.6695915,11.1797202],[-10.6698732,11.1797465],[-10.6702834,11.1796754],[-10.67225,11.1786192],[-10.6725151,11.1785571],[-10.6727512,11.1785807],[-10.6729845,11.1787176],[-10.6731911,11.1789991],[-10.6733767,11.1794121],[-10.6738971,11.1799685],[-10.6742452,11.1803412],[-10.6747548,11.1806936],[-10.6752885,11.1808858],[-10.6756667,11.1809962],[-10.6759454,11.1810148],[-10.6762836,11.1808358],[-10.6764525,11.1805964],[-10.676576,11.1801991],[-10.6766699,11.1796648],[-10.676568,11.1787124],[-10.6765465,11.1784308],[-10.6765948,11.1780939],[-10.6769422,11.1773025],[-10.6769783,11.1769178],[-10.6769514,11.1766573],[-10.6767074,11.1761441],[-10.6761168,11.1754886],[-10.675597,11.1753178],[-10.6753073,11.1753311],[-10.6750901,11.1754152],[-10.6744262,11.1756595],[-10.6739554,11.1756441],[-10.6734808,11.1753479],[-10.6732209,11.1750124],[-10.6725458,11.1746742],[-10.6719667,11.1745033],[-10.6707735,11.1743827],[-10.6698077,11.1740563],[-10.6688607,11.1734343],[-10.668646,11.173121],[-10.6685248,11.1722599],[-10.6683138,11.1714652],[-10.6668411,11.1685599],[-10.6666088,11.1682074],[-10.6665492,11.1678759],[-10.6665834,11.16764],[-10.6668567,11.1673816],[-10.6677845,11.1670823],[-10.6687871,11.1671138],[-10.6695373,11.1673006],[-10.6716123,11.1673211],[-10.6720606,11.1672897],[-10.6727199,11.1670982],[-10.6749901,11.1660851],[-10.675275,11.1657891],[-10.6752653,11.1654208],[-10.6750343,11.1650925],[-10.6747004,11.164921],[-10.6723182,11.1648427],[-10.6715522,11.1646277],[-10.6707882,11.1642471],[-10.6694958,11.1633965],[-10.6687102,11.1627791],[-10.66834,11.1623447],[-10.6680791,11.1617552],[-10.6677943,11.1601319],[-10.6678561,11.1598715],[-10.6679687,11.1596819],[-10.6683469,11.1592846],[-10.6689906,11.158753],[-10.6694655,11.1583873],[-10.6697926,11.1580768],[-10.6699026,11.1578215],[-10.6699455,11.1574188],[-10.6699374,11.1568952],[-10.6700072,11.1561136],[-10.6699178,11.1550381],[-10.6700126,11.1545506],[-10.6701762,11.1543084],[-10.6704712,11.154269],[-10.6708414,11.1543453],[-10.6712732,11.1545715],[-10.6724335,11.1556949],[-10.6726483,11.1557789],[-10.6729233,11.1557203],[-10.6738079,11.1551742],[-10.6742666,11.1550058],[-10.6746207,11.1549637],[-10.674921,11.15499],[-10.6757122,11.1554348],[-10.6761951,11.1558716],[-10.6764311,11.1562557],[-10.6767261,11.1572346],[-10.6770694,11.157782],[-10.6776211,11.1581882],[-10.6779519,11.1583688],[-10.678306,11.158415],[-10.6786238,11.1583754],[-10.6790597,11.1582742],[-10.6794915,11.1582136],[-10.6800682,11.1583137],[-10.6804839,11.1584241],[-10.6819081,11.15909],[-10.6827559,11.1592242],[-10.6840673,11.1591741],[-10.6853252,11.1590487],[-10.6876881,11.1584831],[-10.6896143,11.158301],[-10.6903756,11.1581727],[-10.6909419,11.1578558],[-10.6913763,11.1575031],[-10.69235,11.1565768],[-10.693211,11.1560399],[-10.6937769,11.1557031],[-10.6942635,11.1553069],[-10.6944717,11.1549927],[-10.6945601,11.1547452],[-10.6945139,11.1544726],[-10.6941283,11.1538769],[-10.6934745,11.1533851],[-10.6927553,11.1530412],[-10.692002,11.1528907],[-10.6913598,11.1528331],[-10.6911967,11.1527453],[-10.6910437,11.1525768],[-10.6909929,11.1523427],[-10.6910598,11.1521663],[-10.6915388,11.1515339],[-10.6919213,11.1512389],[-10.6922026,11.1511888],[-10.6924158,11.1512125],[-10.6926101,11.1513045],[-10.6929749,11.1516031],[-10.6932807,11.1518663],[-10.6936751,11.1520427],[-10.6939058,11.1520848],[-10.6942222,11.1520795],[-10.6946594,11.1519638],[-10.6955391,11.1517768],[-10.6962902,11.1516427],[-10.6967711,11.1516018],[-10.6972154,11.1514018],[-10.6982321,11.1505295],[-10.6994391,11.1497347],[-10.7000881,11.1493558],[-10.7008776,11.1482555],[-10.7016037,11.1467795],[-10.7016197,11.1465559],[-10.7015446,11.1462452],[-10.7013139,11.1455452],[-10.7012362,11.1450164],[-10.7012522,11.1445268],[-10.7013703,11.1438742],[-10.7013729,11.1432241],[-10.7011236,11.1422321],[-10.701102,11.1419584],[-10.7011638,11.1417926],[-10.701247,11.1416584],[-10.701499,11.1414925],[-10.7023761,11.1410609],[-10.7032746,11.1404267],[-10.7038219,11.1397912],[-10.7039264,11.1395503],[-10.7039961,11.1392214],[-10.7040043,11.1386267],[-10.7040552,11.1382925],[-10.7041892,11.1379897],[-10.7051365,11.1365298],[-10.7053802,11.1357003],[-10.7053453,11.1354054],[-10.705238,11.1351922],[-10.7047203,11.1348186],[-10.6758166,11.1234054],[-10.7080316,11.0733117],[-10.7362817,11.0446134],[-10.791295,10.9945063],[-10.8007523,10.9561587],[-10.8017376,10.9521632],[-10.801914,10.9514478],[-10.8026942,10.9482834],[-10.8190495,10.9229794],[-10.8676198,10.9059466],[-10.8924006,10.8694445],[-10.88794,10.8392661],[-10.8344136,10.8270966],[-10.7486721,10.8085979],[-10.675321,10.7725708],[-10.6222901,10.7092696],[-10.5757023,10.677127],[-10.5261407,10.6216],[-10.4768506,10.5618295],[-10.4767801,10.5617441],[-10.4731099,10.5572929],[-10.4500256,10.5221193],[-10.4482965,10.5183492],[-10.4412931,10.5030794],[-10.424895,10.5067429],[-10.4248849,10.5067444],[-10.4237467,10.5069178],[-10.4223866,10.5070798],[-10.4205896,10.506788],[-10.4197818,10.506861],[-10.4183392,10.507412],[-10.4174832,10.5077332],[-10.4156603,10.508417],[-10.4144733,10.5093654],[-10.4126021,10.5103298],[-10.4090411,10.5118129],[-10.4060983,10.5130448],[-10.4055213,10.5135555],[-10.4050762,10.5140418],[-10.405056,10.5148228],[-10.4054475,10.515535],[-10.4057372,10.5161995],[-10.4060406,10.5169999],[-10.4067001,10.5197959],[-10.406634,10.5209631],[-10.4063127,10.5218139],[-10.4053234,10.5237105],[-10.4047795,10.5249179],[-10.4045347,10.525659],[-10.4040541,10.5271142],[-10.4037325,10.5290593],[-10.4031886,10.5316607],[-10.4030072,10.5330466],[-10.402694,10.5339056],[-10.4021603,10.5345357],[-10.4017625,10.5347645],[-10.4010783,10.5352428],[-10.4007404,10.535648],[-10.4002705,10.5361667],[-10.399471,10.5365961],[-10.3988692,10.5364503],[-10.3978306,10.535648],[-10.3967425,10.5347645],[-10.3953,10.5334761],[-10.3946984,10.532835],[-10.3937338,10.5318065],[-10.3924478,10.5305424],[-10.3908735,10.5288242],[-10.3884995,10.5253799],[-10.386686,10.5233943],[-10.3850951,10.5214574],[-10.3844191,10.5208415],[-10.3837597,10.5204443],[-10.3831991,10.5203796],[-10.3824078,10.5205254],[-10.3819463,10.5208171],[-10.3813444,10.5211171],[-10.3808251,10.5214656],[-10.3803058,10.5219356],[-10.3800338,10.5226488],[-10.3797865,10.5234349],[-10.3797618,10.5239941],[-10.3798031,10.5246748],[-10.3804213,10.5265064],[-10.3808334,10.5280139],[-10.3808416,10.528954],[-10.3807427,10.5300318],[-10.3803801,10.5308584],[-10.3800997,10.5312961],[-10.3796464,10.5318472],[-10.3790117,10.5323172],[-10.3781132,10.5325765],[-10.3765552,10.5325927],[-10.3738269,10.5321955],[-10.3701504,10.5312231],[-10.3685843,10.5308989],[-10.3668449,10.530664],[-10.3661278,10.5308828],[-10.3652293,10.5311988],[-10.3649078,10.5312961],[-10.3641412,10.531288],[-10.3627894,10.5310935],[-10.3599044,10.5304694],[-10.3589976,10.5301777],[-10.3583711,10.5297725],[-10.3577199,10.5290593],[-10.3564917,10.5274709],[-10.3559394,10.5269198],[-10.3552801,10.5265226],[-10.3547194,10.5262877],[-10.3541424,10.5260121],[-10.3535984,10.5255745],[-10.3528483,10.5247803],[-10.3524279,10.5240671],[-10.352057,10.5227216],[-10.3519992,10.5214899],[-10.3518179,10.5207443],[-10.3513234,10.5190665],[-10.3510925,10.51747],[-10.3505155,10.5150549],[-10.3504579,10.5142443],[-10.3505898,10.5136042],[-10.3510844,10.5122507],[-10.3519993,10.510192],[-10.3526341,10.5091141],[-10.3536067,10.5074364],[-10.3545432,10.5054501],[-10.3546542,10.5044418],[-10.3545382,10.5035785],[-10.3543981,10.5029868],[-10.354126,10.5025168],[-10.353698,10.5021568],[-10.3531616,10.5019414],[-10.3527,10.5017792],[-10.3522054,10.5019089],[-10.3518427,10.502144],[-10.3512575,10.5024114],[-10.3504002,10.5026546],[-10.3499056,10.5028571],[-10.3454626,10.5045672],[-10.3442179,10.50477],[-10.342965,10.5048105],[-10.3411515,10.5046645],[-10.3385714,10.5039026],[-10.3374586,10.5033597],[-10.3370781,10.5032286],[-10.3364942,10.5030273],[-10.3358677,10.5028977],[-10.3348538,10.5028248],[-10.334112,10.5028814],[-10.3337163,10.5030355],[-10.3329579,10.5034651],[-10.3322208,10.5039891],[-10.3312681,10.5054994],[-10.3306911,10.5064881],[-10.3304191,10.5071204],[-10.3302377,10.5077444],[-10.3304026,10.5083037],[-10.3306911,10.5089115],[-10.331433,10.5097624],[-10.3325793,10.5113878],[-10.332876,10.5121984],[-10.3331068,10.513406],[-10.333148,10.5141516],[-10.3330079,10.5149133],[-10.332744,10.5155294],[-10.3323649,10.5160967],[-10.3317302,10.5169476],[-10.3313262,10.5173691],[-10.3308234,10.5178392],[-10.3302052,10.5181796],[-10.3286391,10.5186252],[-10.3258282,10.5194033],[-10.3234048,10.5198895],[-10.3210802,10.5204406],[-10.3192256,10.5209269],[-10.3184094,10.5212917],[-10.3174616,10.5219805],[-10.3161097,10.5231961],[-10.3152276,10.5236663],[-10.3143621,10.5239905],[-10.3133482,10.5240715],[-10.3119387,10.5241606],[-10.3114935,10.5243146],[-10.3110485,10.5246873],[-10.3102241,10.5254006],[-10.3092927,10.5264055],[-10.3089134,10.5270134],[-10.3086909,10.527686],[-10.3085591,10.5287314],[-10.3082375,10.5295824],[-10.3074133,10.5315192],[-10.3069681,10.5323622],[-10.3064077,10.5333266],[-10.3058306,10.5339992],[-10.3049569,10.5347609],[-10.3046849,10.5350122],[-10.304248,10.5357254],[-10.3039347,10.5366329],[-10.3036462,10.5379054],[-10.3034154,10.5387724],[-10.3031269,10.5395505],[-10.3025417,10.5404095],[-10.301808,10.5412846],[-10.3007117,10.5428406],[-10.3002171,10.5436429],[-10.2996072,10.5445263],[-10.2987251,10.545296],[-10.2981316,10.5458391],[-10.2974804,10.546463],[-10.2968375,10.5470789],[-10.2964666,10.5476138],[-10.2960297,10.5480109],[-10.2953373,10.5484566],[-10.2948673,10.5486511],[-10.2941996,10.548643],[-10.2936969,10.548578],[-10.2932022,10.5485133],[-10.2927737,10.5482621],[-10.2922049,10.5478326],[-10.2920071,10.5475327],[-10.2918587,10.5465684],[-10.2918587,10.5454744],[-10.2916691,10.5446072],[-10.2908613,10.5400609],[-10.2907541,10.5393235],[-10.2907541,10.5384483],[-10.2908943,10.537411],[-10.2910591,10.5369005],[-10.291257,10.5363088],[-10.2912734,10.5355714],[-10.2908612,10.5326053],[-10.2910673,10.5306603],[-10.2915866,10.5292664],[-10.2920152,10.5283182],[-10.2921554,10.5271836],[-10.2921306,10.5264299],[-10.2918174,10.5254898],[-10.2911745,10.523034],[-10.2908392,10.5213819],[-10.2904243,10.5196384],[-10.2901112,10.5191439],[-10.2896824,10.5188279],[-10.2888417,10.5186821],[-10.2881163,10.5186821],[-10.2875228,10.5187712],[-10.2867891,10.5187631],[-10.2860639,10.5186252],[-10.2850581,10.5183255],[-10.2844069,10.5178797],[-10.2837557,10.5173691],[-10.2821484,10.5166072],[-10.2782907,10.5149782],[-10.2757518,10.5138517],[-10.2750347,10.5136733],[-10.2745648,10.5136491],[-10.2741527,10.5137545],[-10.2734603,10.5140624],[-10.2730481,10.5143542],[-10.2725947,10.514727],[-10.2717787,10.5151484],[-10.2711768,10.5152619],[-10.2705421,10.515189],[-10.2697096,10.5150188],[-10.2688442,10.5147594],[-10.2680611,10.5144027],[-10.2665856,10.5138598],[-10.2648051,10.5134222],[-10.2629339,10.5127413],[-10.2619612,10.5122875],[-10.261104,10.5121984],[-10.2605022,10.5122227],[-10.2596367,10.5122794],[-10.2590432,10.5123685],[-10.256661,10.5126685],[-10.2552679,10.5128386],[-10.2514019,10.5126521],[-10.248385,10.5124983],[-10.2450548,10.5119146],[-10.2430847,10.5120525],[-10.2395402,10.5124172],[-10.2378174,10.5126685],[-10.2356248,10.5131709],[-10.2339102,10.5137301],[-10.232039,10.514492],[-10.2289231,10.515189],[-10.224678,10.5167207],[-10.2215539,10.5175959],[-10.2202432,10.5179932],[-10.2193117,10.5181553],[-10.2179681,10.5183174],[-10.2170943,10.5182687],[-10.2163442,10.5179932],[-10.215487,10.517369],[-10.2143468,10.516162],[-10.2137616,10.5153191],[-10.2135556,10.5145491],[-10.2135308,10.5138603],[-10.2135061,10.5130174],[-10.2136133,10.512061],[-10.2139512,10.5109588],[-10.2142397,10.5100349],[-10.2144953,10.5095243],[-10.2148827,10.5091595],[-10.2158307,10.5084302],[-10.2168445,10.5077899],[-10.2175287,10.5074494],[-10.2194988,10.5070037],[-10.2213617,10.5064769],[-10.227239,10.5039724],[-10.2283353,10.503397],[-10.2296377,10.5023515],[-10.2299674,10.5019543],[-10.2309978,10.5007467],[-10.2315254,10.499839],[-10.2320942,10.4988419],[-10.232292,10.4982666],[-10.2322755,10.497756],[-10.2319293,10.4970589],[-10.2309813,10.4962645],[-10.2302972,10.4955109],[-10.2298438,10.4945788],[-10.2295883,10.4940032],[-10.2295306,10.4928605],[-10.229613,10.4921067],[-10.2297779,10.4915311],[-10.2300993,10.490437],[-10.2303219,10.4893023],[-10.2305774,10.4881188],[-10.2314265,10.4861169],[-10.2319293,10.4852657],[-10.2329762,10.4838555],[-10.2336521,10.4825504],[-10.2344924,10.4809497],[-10.2349545,10.4796649],[-10.2350864,10.4789598],[-10.2350039,10.4781897],[-10.2347979,10.477606],[-10.2346083,10.4772009],[-10.2342126,10.476828],[-10.2338582,10.4766091],[-10.2334625,10.4765362],[-10.2329267,10.4766578],[-10.2324898,10.4769576],[-10.2322508,10.4772657],[-10.2318716,10.4777115],[-10.2314842,10.4782141],[-10.2308818,10.4788129],[-10.2302477,10.4791056],[-10.2268516,10.4793568],[-10.2253184,10.4795191],[-10.2243375,10.4795191],[-10.2237934,10.4794542],[-10.2229938,10.479211],[-10.2220789,10.4789029],[-10.2206858,10.4785869],[-10.2194576,10.4781168],[-10.2183131,10.4775474],[-10.215369,10.4760823],[-10.2144541,10.4753365],[-10.2135721,10.4743963],[-10.2128632,10.4731237],[-10.2120718,10.4713728],[-10.2113217,10.4700597],[-10.210654,10.4692166],[-10.2086262,10.4672712],[-10.207769,10.466096],[-10.2072249,10.4649449],[-10.2067468,10.4636804],[-10.2063182,10.4620916],[-10.2057709,10.4596611],[-10.2054742,10.4588585],[-10.204823,10.4578291],[-10.2040234,10.4571482],[-10.2032733,10.4566698],[-10.2026138,10.4560457],[-10.202449,10.4555837],[-10.2022005,10.4550959],[-10.201943,10.4545578],[-10.2012242,10.4534393],[-10.200347,10.4522034],[-10.1993842,10.4502899],[-10.1988102,10.4491716],[-10.1985152,10.4482484],[-10.1982255,10.4474676],[-10.1970003,10.4452886],[-10.1963327,10.4445672],[-10.1957804,10.443943],[-10.1950632,10.4427999],[-10.1945192,10.4411624],[-10.1943296,10.4401411],[-10.193868,10.4389008],[-10.1934476,10.4383819],[-10.1928294,10.437936],[-10.1922111,10.4375226],[-10.1908346,10.4370524],[-10.1898454,10.4368659],[-10.1893178,10.4369552],[-10.1886749,10.4372308],[-10.1879165,10.4375632],[-10.1868779,10.437782],[-10.1859217,10.4378712],[-10.1850727,10.4377657],[-10.1845946,10.4378388],[-10.1841824,10.4379766],[-10.1836054,10.4382278],[-10.1832262,10.4384225],[-10.1828058,10.4388602],[-10.182608,10.4392655],[-10.1824514,10.4397438],[-10.1825091,10.4401086],[-10.1827646,10.4405059],[-10.1830284,10.4407571],[-10.1834323,10.441122],[-10.18414,10.4423123],[-10.1845699,10.4431242],[-10.1854189,10.4444699],[-10.1863091,10.4454103],[-10.186779,10.4457425],[-10.1874219,10.4460669],[-10.1884111,10.4468775],[-10.1890046,10.4475178],[-10.1903812,10.4490825],[-10.1913786,10.4504524],[-10.1919803,10.4514738],[-10.1925394,10.4524841],[-10.1926053,10.4528003],[-10.1926053,10.4531327],[-10.1923003,10.4536758],[-10.1917645,10.4545998],[-10.1906188,10.4567398],[-10.1902808,10.4573884],[-10.1899181,10.4580855],[-10.1892339,10.4588313],[-10.1889372,10.4590583],[-10.1884673,10.4592366],[-10.1879645,10.459269],[-10.187371,10.4592852],[-10.1865632,10.4590906],[-10.1859944,10.4587826],[-10.1851784,10.4584179],[-10.1845849,10.4582475],[-10.1840161,10.4582639],[-10.1832,10.4583368],[-10.1827137,10.4585476],[-10.182285,10.4588474],[-10.1817245,10.4593663],[-10.1810651,10.4601931],[-10.1803067,10.4609389],[-10.1800429,10.4612793],[-10.1797957,10.4617008],[-10.1795648,10.46226],[-10.1795236,10.4627627],[-10.1794125,10.4636207],[-10.1793423,10.4644569],[-10.1791335,10.4654986],[-10.1791362,10.4665401],[-10.1792928,10.4685341],[-10.1795154,10.4695716],[-10.1798204,10.4705687],[-10.18001,10.4713873],[-10.1798616,10.4725789],[-10.1795731,10.4742891],[-10.1792269,10.4755537],[-10.1787488,10.476348],[-10.1782789,10.4768506],[-10.1779245,10.4769721],[-10.1773557,10.4770208],[-10.1767457,10.4769559],[-10.1758225,10.4769235],[-10.1748004,10.4770774],[-10.174413,10.4772559],[-10.1738689,10.4773855],[-10.173193,10.4774018],[-10.1727314,10.4773207],[-10.1723522,10.4770451],[-10.1719813,10.4763804],[-10.171701,10.4758697],[-10.1706789,10.4742568],[-10.169937,10.4732759],[-10.1692693,10.4727977],[-10.1684862,10.4724897],[-10.1680493,10.4724248],[-10.1648263,10.4726598],[-10.1639031,10.4727977],[-10.162815,10.473203],[-10.1617022,10.4735759],[-10.1608759,10.4742456],[-10.1599382,10.4756914],[-10.1596497,10.4765912],[-10.1589408,10.4777827],[-10.1582236,10.4789418],[-10.157075,10.4802054],[-10.1558734,10.4820306],[-10.1549293,10.4829907],[-10.1532861,10.4840726],[-10.1524041,10.4847371],[-10.1517281,10.485491],[-10.1511923,10.4865366],[-10.150739,10.4875254],[-10.1500218,10.4888061],[-10.1488843,10.4910187],[-10.1472027,10.4931342],[-10.1465268,10.4941069],[-10.1459086,10.4955415],[-10.1453892,10.4970976],[-10.1446474,10.4990429],[-10.1438313,10.5011988],[-10.1428669,10.5028523],[-10.1424712,10.503922],[-10.1423064,10.505227],[-10.1422899,10.5067912],[-10.142463,10.5085012],[-10.1427597,10.5100088],[-10.1427927,10.514434],[-10.1425866,10.5190859],[-10.1420755,10.5232192],[-10.1417622,10.5248969],[-10.1411441,10.5260962],[-10.1381816,10.5303343],[-10.1375754,10.5309144],[-10.1355608,10.5316208],[-10.1358829,10.5285623],[-10.1364562,10.5262888],[-10.137281,10.5241342],[-10.1382145,10.5207458],[-10.1387496,10.5177394],[-10.1380425,10.5131546],[-10.1374691,10.5120647],[-10.135214,10.5092085],[-10.1345069,10.5079684],[-10.1340968,10.5054945],[-10.1342207,10.5049012],[-10.1343725,10.5043137],[-10.1347745,10.5037592],[-10.1345833,10.502425],[-10.1340673,10.5012412],[-10.1334289,10.5005601],[-10.1327309,10.4999835],[-10.1315285,10.4992667],[-10.1301686,10.4988359],[-10.1286971,10.4983098],[-10.1281811,10.4981031],[-10.127818,10.4971823],[-10.1279517,10.4963555],[-10.1290793,10.4953219],[-10.1310095,10.4944951],[-10.1328442,10.4941568],[-10.1347745,10.4944011],[-10.1354242,10.4943448],[-10.1370869,10.4927475],[-10.1370678,10.4922025],[-10.1361314,10.490718],[-10.1358065,10.4895717],[-10.1352905,10.4888012],[-10.1329971,10.487373],[-10.1303024,10.4868844],[-10.1267477,10.4869972],[-10.1248175,10.4875045],[-10.1235562,10.4875609],[-10.122505,10.487016],[-10.1217024,10.4861515],[-10.1198486,10.4848173],[-10.1184152,10.4845354],[-10.1157588,10.4844226],[-10.1148414,10.484028],[-10.1133316,10.4827689],[-10.1114205,10.4813031],[-10.1105796,10.4807769],[-10.1085538,10.4805514],[-10.1082671,10.4802695],[-10.1081334,10.4799689],[-10.1084009,10.4793675],[-10.1091654,10.4790105],[-10.1104458,10.4788977],[-10.1135419,10.4782587],[-10.114249,10.4777889],[-10.1149943,10.4760036],[-10.1156632,10.4754774],[-10.1172112,10.47497],[-10.1176508,10.4744438],[-10.1177654,10.4732787],[-10.1170392,10.4718692],[-10.1155103,10.4710799],[-10.1147841,10.4706289],[-10.1148032,10.4694825],[-10.1155676,10.4682046],[-10.1165041,10.4645587],[-10.1161608,10.4621073],[-10.1156339,10.4600879],[-10.1147422,10.4593704],[-10.1134182,10.4577761],[-10.1130669,10.4566069],[-10.1134722,10.4552783],[-10.1133236,10.4538833],[-10.1132831,10.4529001],[-10.1130399,10.4520896],[-10.1120536,10.4507875],[-10.1120941,10.4501099],[-10.1125805,10.4494855],[-10.1135803,10.4490736],[-10.1145125,10.4484491],[-10.1161203,10.4464163],[-10.1179712,10.4443702],[-10.1187818,10.4439317],[-10.1197411,10.4441709],[-10.1208354,10.4450743],[-10.1224297,10.4452736],[-10.1233484,10.4453135],[-10.124186,10.445845],[-10.1246724,10.4477051],[-10.1257533,10.4491267],[-10.1278744,10.4506015],[-10.1297929,10.4512924],[-10.1313061,10.4521162],[-10.1323194,10.4525015],[-10.1366157,10.4529266],[-10.138926,10.4523288],[-10.1417497,10.4506945],[-10.1425603,10.4496582],[-10.1436277,10.4493792],[-10.1445869,10.449326],[-10.1456137,10.4496981],[-10.1467756,10.4506547],[-10.149194,10.45387],[-10.1501262,10.4549329],[-10.1509233,10.4551322],[-10.1517745,10.4537903],[-10.1519772,10.4528071],[-10.1516499,10.4511968],[-10.1508589,10.4500426],[-10.1503552,10.4489926],[-10.150186,10.4480154],[-10.150472,10.4462101],[-10.1511456,10.4453569],[-10.1522474,10.4447688],[-10.1538335,10.4432278],[-10.1548249,10.4416845],[-10.1555459,10.4398562],[-10.155208,10.4382583],[-10.154689,10.4373091],[-10.1529476,10.4362973],[-10.1520233,10.4352645],[-10.1511395,10.4330497],[-10.1501709,10.4315484],[-10.1496586,10.4308045],[-10.1494038,10.4304115],[-10.1490724,10.4300468],[-10.1479977,10.4297936],[-10.1471691,10.4292703],[-10.146727,10.4286467],[-10.1466267,10.4279514],[-10.1465419,10.4276602],[-10.1463783,10.4273937],[-10.1462026,10.427151],[-10.1459778,10.4269316],[-10.1449406,10.4261328],[-10.144423,10.4257345],[-10.1438707,10.42533],[-10.1435043,10.4249418],[-10.1432119,10.4244854],[-10.1430859,10.4242665],[-10.1429276,10.4240422],[-10.1425738,10.423629],[-10.1418333,10.4226692],[-10.1414444,10.4222181],[-10.1409861,10.4218246],[-10.1407,10.4215533],[-10.1404849,10.4211895],[-10.1403165,10.420638],[-10.1402396,10.4200837],[-10.1405338,10.4183538],[-10.1404932,10.416653],[-10.1405778,10.4162367],[-10.1406142,10.4158184],[-10.1407499,10.4153906],[-10.1422505,10.4127494],[-10.1426819,10.4117497],[-10.1422821,10.4102056],[-10.1421592,10.4099355],[-10.1419548,10.4096969],[-10.1411694,10.4097456],[-10.1403716,10.4099292],[-10.1377723,10.4109612],[-10.1358456,10.4114042],[-10.1331948,10.412101],[-10.1318313,10.412348],[-10.1305225,10.4126533],[-10.1299176,10.4131724],[-10.1293786,10.4137857],[-10.1286985,10.4142346],[-10.1275637,10.4143143],[-10.1264558,10.4134373],[-10.1258473,10.4127807],[-10.1254425,10.4120287],[-10.1253614,10.4101817],[-10.1246319,10.4091851],[-10.1240602,10.4088431],[-10.1238799,10.4086191],[-10.1238469,10.408492],[-10.1238656,10.4082176],[-10.1248788,10.4072698],[-10.1257938,10.4068065],[-10.1265098,10.4052385],[-10.1270773,10.4045342],[-10.1282797,10.4039096],[-10.1289552,10.4030725],[-10.1291424,10.4024302],[-10.1293857,10.4017568],[-10.1298563,10.400967],[-10.1305225,10.4002022],[-10.1322518,10.399458],[-10.133171,10.3985083],[-10.1339812,10.3968401],[-10.1345882,10.3947553],[-10.1352234,10.392088],[-10.1355789,10.3917507],[-10.1365346,10.3910728],[-10.1376425,10.3910728],[-10.1387504,10.3914183],[-10.1399933,10.3928934],[-10.1421415,10.3940096],[-10.1440195,10.394209],[-10.1449787,10.3945545],[-10.1466675,10.3960561],[-10.1482077,10.3970793],[-10.1494237,10.3972122],[-10.1507747,10.3969863],[-10.1515989,10.3957505],[-10.1515718,10.3941027],[-10.1507342,10.3922821],[-10.1507612,10.3905545],[-10.1497811,10.3886143],[-10.1494839,10.3875313],[-10.149977,10.3859831],[-10.1503046,10.3839964],[-10.1505478,10.3828537],[-10.1513043,10.3810465],[-10.1526012,10.3796779],[-10.1534598,10.3786594],[-10.154044,10.3778541],[-10.1543048,10.377189],[-10.1546475,10.3753093],[-10.1546335,10.3738625],[-10.1554652,10.37192],[-10.1565655,10.3707504],[-10.1572078,10.3705356],[-10.158159,10.3703413],[-10.1591932,10.3704184],[-10.160218,10.3710383],[-10.1608921,10.371739],[-10.1614686,10.3718194],[-10.1620089,10.37141],[-10.1623069,10.3700347],[-10.1623142,10.3690473],[-10.1617603,10.3677184],[-10.161651,10.366315],[-10.1609498,10.3658049],[-10.1593287,10.3649943],[-10.1552506,10.3630463],[-10.1547491,10.362496],[-10.1545195,10.3617651],[-10.1546339,10.3610688],[-10.155194,10.3603943],[-10.1577284,10.3587805],[-10.1582603,10.3582901],[-10.1594289,10.3576522],[-10.1601381,10.3571406],[-10.1604488,10.3554728],[-10.1609351,10.3549878],[-10.1618673,10.3546755],[-10.1626981,10.354629],[-10.1649187,10.3552235],[-10.1654138,10.3554087],[-10.1665353,10.3550773],[-10.1676871,10.3545316],[-10.1680382,10.3539491],[-10.1681861,10.3528748],[-10.1680091,10.3511087],[-10.1681591,10.3500642],[-10.1684473,10.3491085],[-10.1685779,10.3486754],[-10.1690102,10.3476854],[-10.1690034,10.3470143],[-10.1685036,10.3460043],[-10.1676728,10.3448215],[-10.1664907,10.3442301],[-10.1659504,10.3434859],[-10.1658355,10.3423364],[-10.1660584,10.3416719],[-10.166842,10.3407815],[-10.1675782,10.3390273],[-10.1684225,10.3378711],[-10.1691655,10.3370139],[-10.1699761,10.3356051],[-10.1707663,10.3352596],[-10.1711649,10.3344622],[-10.1714688,10.3330601],[-10.1714688,10.3321365],[-10.1721308,10.3316647],[-10.1736573,10.3314055],[-10.1753797,10.3312859],[-10.1774803,10.330947],[-10.1793243,10.3302294],[-10.1805942,10.3299303],[-10.1822625,10.3304686],[-10.1831406,10.3309204],[-10.1851467,10.3311862],[-10.187119,10.3310135],[-10.1889563,10.3311065],[-10.1906854,10.3313191],[-10.1926307,10.3312328],[-10.1934781,10.3312892],[-10.1959269,10.331452],[-10.1970955,10.3311862],[-10.1987436,10.331565],[-10.199419,10.3311464],[-10.2007024,10.3290798],[-10.2017493,10.3275846],[-10.2025058,10.3273321],[-10.2043903,10.3276577],[-10.2061465,10.3274318],[-10.2095562,10.3287514],[-10.2121207,10.3310758],[-10.2150824,10.3329356],[-10.2162895,10.3329899],[-10.2178368,10.3333243],[-10.2202741,10.3343689],[-10.2214583,10.3344411],[-10.2238028,10.3342762],[-10.2247215,10.3350071],[-10.2259913,10.3365354],[-10.2271936,10.3369474],[-10.2281461,10.3368433],[-10.2284094,10.3368145],[-10.2303817,10.3351799],[-10.2313274,10.334635],[-10.2332186,10.3342097],[-10.2370147,10.3344356],[-10.2384196,10.3340236],[-10.2401083,10.3332528],[-10.2403519,10.3327666],[-10.2410539,10.3313657],[-10.2423778,10.3293323],[-10.2432288,10.3287076],[-10.2435395,10.327764],[-10.2439178,10.3265148],[-10.2454578,10.3243883],[-10.2455524,10.3228201],[-10.2451927,10.3217298],[-10.2450526,10.3213049],[-10.2438503,10.3200025],[-10.2414456,10.3192316],[-10.2409716,10.3183496],[-10.2410649,10.3179108],[-10.2431343,10.317464],[-10.2436071,10.3167995],[-10.2437827,10.3157761],[-10.243563,10.3152532],[-10.2429979,10.3148871],[-10.2419416,10.3145363],[-10.2396793,10.3143022],[-10.2378522,10.313211],[-10.2367715,10.3125996],[-10.2365013,10.3119616],[-10.2363065,10.3097747],[-10.2357567,10.3086403],[-10.2349826,10.3080521],[-10.234361,10.3065055],[-10.2333132,10.3051566],[-10.2321429,10.3041727],[-10.2316423,10.3038634],[-10.2305799,10.3038255],[-10.2284992,10.3053306],[-10.227989,10.3060729],[-10.2275315,10.306401],[-10.2269902,10.3062524],[-10.2269234,10.3058321],[-10.2272664,10.3051778],[-10.2280909,10.3038709],[-10.2284701,10.302905],[-10.2291004,10.3018556],[-10.2293692,10.3007511],[-10.2294524,10.2986633],[-10.2296126,10.297254],[-10.2295636,10.2959447],[-10.2298602,10.2947353],[-10.2304777,10.2933221],[-10.2311031,10.2923206],[-10.2319715,10.2912525],[-10.2331082,10.2883791],[-10.2337047,10.2877546],[-10.2341483,10.2875301],[-10.2352986,10.2872059],[-10.2354795,10.2865121],[-10.2346721,10.2819645],[-10.2345913,10.2805832],[-10.2346908,10.2796042],[-10.2351365,10.2781689],[-10.235123,10.277119],[-10.2347718,10.2757767],[-10.234056,10.2750324],[-10.2332321,10.2749527],[-10.2321515,10.2752982],[-10.2307468,10.2758033],[-10.2304362,10.2760957],[-10.2306928,10.2767867],[-10.2305713,10.2772386],[-10.2294367,10.277717],[-10.2289775,10.2786606],[-10.2291531,10.2802953],[-10.2297473,10.2815047],[-10.2294367,10.2824084],[-10.2287479,10.282621],[-10.2274702,10.2816519],[-10.2262881,10.2796165],[-10.2259926,10.2785018],[-10.2262758,10.2774962],[-10.2270146,10.2756667],[-10.2275072,10.2746611],[-10.2278643,10.2735343],[-10.2281228,10.2719955],[-10.2281721,10.271099],[-10.2283198,10.2703478],[-10.2287385,10.2698146],[-10.2300807,10.2694269],[-10.2312997,10.2694875],[-10.2323094,10.2697177],[-10.2332575,10.2702872],[-10.2345381,10.2710263],[-10.2364221,10.2716442],[-10.2375426,10.2718138],[-10.2382198,10.2714261],[-10.2383676,10.2709657],[-10.2380228,10.2692452],[-10.2382814,10.268288],[-10.2391926,10.2668704],[-10.2397467,10.2660102],[-10.2398083,10.2654767],[-10.2396732,10.2646837],[-10.2398817,10.2640799],[-10.2405963,10.2628478],[-10.2410519,10.2618785],[-10.2415937,10.2605578],[-10.2417907,10.259952],[-10.2421355,10.2592128],[-10.2421109,10.258607],[-10.2417168,10.2579285],[-10.2411258,10.2578679],[-10.2397713,10.2583162],[-10.2378504,10.2592007],[-10.2369269,10.2595763],[-10.2363974,10.2591159],[-10.235634,10.2582556],[-10.2350676,10.2579285],[-10.2344519,10.2578316],[-10.2331467,10.2580618],[-10.2317676,10.25788],[-10.2309672,10.2573832],[-10.2303023,10.2570803],[-10.2301669,10.2562927],[-10.2304378,10.2557475],[-10.2312135,10.2550568],[-10.232765,10.2539179],[-10.2340825,10.2528758],[-10.234846,10.2522094],[-10.2357325,10.2507554],[-10.2363642,10.2499179],[-10.2366191,10.24958],[-10.2372224,10.2485259],[-10.2373579,10.247811],[-10.237284,10.2469628],[-10.2369516,10.2454118],[-10.2369023,10.2443455],[-10.2370131,10.2433277],[-10.2367176,10.2426733],[-10.2362989,10.2423825],[-10.2353754,10.2425643],[-10.234218,10.2430126],[-10.2323833,10.2434367],[-10.2311027,10.2438366],[-10.230056,10.2441516],[-10.2288616,10.2440789],[-10.2281844,10.2438729],[-10.2283691,10.2429278],[-10.2286893,10.2418494],[-10.2293049,10.2403226],[-10.2296497,10.2393411],[-10.2299083,10.2379718],[-10.2291941,10.23716],[-10.2286646,10.2363239],[-10.2284799,10.2353908],[-10.2288863,10.234688],[-10.229071,10.2334641],[-10.2289971,10.2326886],[-10.2285907,10.2312103],[-10.2285169,10.2297562],[-10.2281351,10.2287019],[-10.2277781,10.2278537],[-10.22766,10.2278108],[-10.2269777,10.2275629],[-10.2260296,10.2276113],[-10.2249583,10.2275265],[-10.2239732,10.2270781],[-10.2230743,10.2257694],[-10.2218799,10.2243637],[-10.220784,10.2230792],[-10.219762,10.2223279],[-10.2189247,10.2225461],[-10.2180628,10.2230308],[-10.2164005,10.2236003],[-10.2159818,10.223879],[-10.2150583,10.2244365],[-10.2142579,10.224703],[-10.2137493,10.2245424],[-10.2136239,10.2244489],[-10.2135488,10.2242747],[-10.2135328,10.2240978],[-10.2135512,10.2239011],[-10.2136749,10.2235171],[-10.2138156,10.2231302],[-10.2140021,10.2228361],[-10.2142148,10.222533],[-10.2145133,10.2221044],[-10.2147424,10.2215558],[-10.2150203,10.2210955],[-10.215637,10.2200134],[-10.2163143,10.2193711],[-10.2168684,10.2189955],[-10.2173117,10.2186562],[-10.2173979,10.2179533],[-10.2173486,10.2171656],[-10.2172193,10.2166779],[-10.2170038,10.216072],[-10.2165944,10.215151],[-10.2159818,10.2143482],[-10.21544,10.2135272],[-10.2150183,10.2126092],[-10.214615,10.2120548],[-10.2141348,10.2116215],[-10.2133006,10.2109581],[-10.2124048,10.21024],[-10.211669,10.2096735],[-10.2110872,10.2094221],[-10.2105547,10.209416],[-10.209899,10.2096947],[-10.2093695,10.2101946],[-10.2084768,10.2112853],[-10.2080489,10.211973],[-10.2077688,10.2124819],[-10.2072301,10.2128031],[-10.2067212,10.2129616],[-10.2062032,10.2127517],[-10.2053107,10.2122161],[-10.2051955,10.2121121],[-10.2046229,10.2115949],[-10.2043225,10.2109779],[-10.2042528,10.2104852],[-10.204366,10.2098896],[-10.2048754,10.2092127],[-10.2055414,10.2084286],[-10.2059681,10.2079916],[-10.2061248,10.2074903],[-10.2060726,10.206899],[-10.205672,10.2065605],[-10.2050756,10.206282],[-10.2046533,10.2062221],[-10.2039829,10.2061749],[-10.2033952,10.2059436],[-10.2029903,10.2055751],[-10.2024766,10.2049967],[-10.2020239,10.2042983],[-10.2019411,10.2035828],[-10.2019676,10.2031302],[-10.2019803,10.2029144],[-10.2023242,10.2022074],[-10.2026508,10.2015347],[-10.2028815,10.2009734],[-10.2030948,10.2005064],[-10.2034213,10.2000222],[-10.2040917,10.199808],[-10.2045837,10.1998123],[-10.2052367,10.1996795],[-10.2057896,10.1992853],[-10.2062119,10.1986212],[-10.2063381,10.1981541],[-10.2061988,10.1974472],[-10.2062685,10.1968216],[-10.2065514,10.196346],[-10.2070173,10.1958404],[-10.2073873,10.1955533],[-10.2078357,10.1952063],[-10.2082018,10.1948558],[-10.2084757,10.1945936],[-10.2089197,10.1940622],[-10.2092549,10.1935824],[-10.2094745,10.193212],[-10.2095902,10.1930168],[-10.2099776,10.1923741],[-10.210352,10.19156],[-10.2106872,10.1909344],[-10.2109049,10.1901717],[-10.2108788,10.1898161],[-10.2108135,10.1891605],[-10.2105523,10.1888263],[-10.2100603,10.1884706],[-10.2092419,10.1881236],[-10.2087108,10.1877636],[-10.2081579,10.1871723],[-10.2077095,10.1864054],[-10.2075919,10.1857541],[-10.2073394,10.1846743],[-10.2068518,10.183813],[-10.2063425,10.1831746],[-10.2062423,10.1828404],[-10.2063686,10.1824804],[-10.2068562,10.1822662],[-10.2073307,10.1823005],[-10.2080534,10.182459],[-10.208898,10.1827418],[-10.209773,10.1830803],[-10.2106263,10.1834274],[-10.2113881,10.183783],[-10.2120803,10.1838259],[-10.2126027,10.1836631],[-10.2130686,10.183316],[-10.2133254,10.1828704],[-10.2134865,10.182429],[-10.2136214,10.1817134],[-10.2139175,10.180985],[-10.2143964,10.1801794],[-10.2145792,10.1797381],[-10.2151408,10.1784226],[-10.2156458,10.1773728],[-10.2162422,10.1759888],[-10.2165295,10.1756031],[-10.2170084,10.1753932],[-10.2178661,10.1753803],[-10.2187237,10.1752603],[-10.2192983,10.1750932],[-10.2199731,10.1748875],[-10.2208351,10.1746433],[-10.2216318,10.1743862],[-10.2218582,10.1740905],[-10.2220454,10.1737477],[-10.2225242,10.1734906],[-10.2229944,10.1731264],[-10.2232077,10.1726422],[-10.2231642,10.1721494],[-10.2232252,10.1716438],[-10.2233993,10.1712067],[-10.2236779,10.170534],[-10.2240218,10.1699083],[-10.2244833,10.1692227],[-10.225145,10.1683786],[-10.2255673,10.1680658],[-10.2260157,10.1679929],[-10.2267123,10.1679415],[-10.2271476,10.1679029],[-10.2277832,10.1678944],[-10.2284885,10.1679501],[-10.228902,10.1679801],[-10.2292939,10.1679244],[-10.2299425,10.1678044],[-10.2305259,10.1678001],[-10.2309438,10.1678815],[-10.231414,10.1680229],[-10.2317536,10.1680701],[-10.2324022,10.1680786],[-10.2328202,10.1680186],[-10.2330552,10.1675344],[-10.2331249,10.1669559],[-10.2333121,10.166566],[-10.233582,10.1661803],[-10.2336691,10.1655718],[-10.2336386,10.1649077],[-10.2335994,10.1641406],[-10.2333121,10.1636178],[-10.2328724,10.1630351],[-10.2324893,10.1627008],[-10.2319016,10.1624694],[-10.2312834,10.162388],[-10.2306783,10.1624994],[-10.2299512,10.1624951],[-10.2295986,10.1623366],[-10.2292155,10.1621909],[-10.228741,10.1621309],[-10.2280183,10.1615095],[-10.2275351,10.1606739],[-10.2274045,10.1600226],[-10.2274175,10.1594741],[-10.2274132,10.1585956],[-10.2271781,10.1574086],[-10.2269648,10.1567658],[-10.2266295,10.1561659],[-10.2261333,10.1553817],[-10.2261463,10.1549789],[-10.2263248,10.1541433],[-10.2264467,10.153509],[-10.2264641,10.1530848],[-10.2265251,10.1523177],[-10.226586,10.1517606],[-10.2266992,10.1510236],[-10.2267906,10.1505522],[-10.2271258,10.1503636],[-10.2275655,10.1505051],[-10.2279356,10.1508479],[-10.228249,10.1513321],[-10.2285842,10.1517906],[-10.2291415,10.1522106],[-10.22969,10.1521806],[-10.2302081,10.1519792],[-10.2306913,10.1516707],[-10.2309917,10.1513278],[-10.2316926,10.1507322],[-10.2326242,10.1502351],[-10.233299,10.149948],[-10.2342394,10.1497208],[-10.23474,10.1497808],[-10.2358066,10.149978],[-10.2366164,10.1502522],[-10.2375567,10.1504836],[-10.2381444,10.1505051],[-10.2389324,10.1503422],[-10.2396768,10.1500979],[-10.2401992,10.1497723],[-10.2406868,10.1494252],[-10.2408697,10.1490823],[-10.2409872,10.1487309],[-10.2409916,10.1479639],[-10.2409833,10.1472422],[-10.241038,10.1464438],[-10.2405693,10.1458255],[-10.2405126,10.1456343],[-10.2406047,10.1454219],[-10.2408727,10.145265],[-10.2411489,10.1450952],[-10.2417665,10.1448503],[-10.2421657,10.1448116],[-10.2424587,10.1449812],[-10.2433599,10.1456026],[-10.2443437,10.146284],[-10.2452111,10.147082],[-10.2459516,10.1476737],[-10.2462592,10.1482595],[-10.2468252,10.1487952],[-10.2472083,10.1490052],[-10.2474976,10.1489845],[-10.2477481,10.1489666],[-10.2485274,10.1488124],[-10.2489932,10.1486924],[-10.2496314,10.1481138],[-10.2506214,10.1467854],[-10.2507866,10.146602],[-10.2513397,10.1459883],[-10.2517054,10.1452641],[-10.2520649,10.1446628],[-10.2521974,10.1444413],[-10.2529374,10.1438585],[-10.2533292,10.1435413],[-10.2534903,10.14307],[-10.2534381,10.140923],[-10.2534511,10.140083],[-10.2533597,10.1384717],[-10.2534555,10.1375803],[-10.2534381,10.1371603],[-10.2529287,10.1363418],[-10.2523236,10.1353261],[-10.2519013,10.1346362],[-10.2515748,10.1343147],[-10.2511656,10.1341433],[-10.2500511,10.1339119],[-10.2491151,10.1338219],[-10.2483533,10.1336676],[-10.2478439,10.1333162],[-10.2473389,10.1327677],[-10.2470908,10.132232],[-10.2471865,10.1318591],[-10.2474477,10.1313106],[-10.2478178,10.1307577],[-10.2483707,10.1303678],[-10.249298,10.1298192],[-10.249964,10.1292321],[-10.250543,10.1285978],[-10.2508434,10.1283792],[-10.2514616,10.1283878],[-10.2522844,10.1285035],[-10.253068,10.1285764],[-10.2541782,10.1284735],[-10.2558847,10.1282678],[-10.2568555,10.1283064],[-10.2575347,10.1285292],[-10.2580005,10.1289964],[-10.2582574,10.1293049],[-10.258536,10.1298063],[-10.2589713,10.1301578],[-10.2594545,10.1300163],[-10.260064,10.1295578],[-10.2604123,10.1291206],[-10.2605516,10.1286449],[-10.2604471,10.1281435],[-10.2600727,10.127475],[-10.2595939,10.1268964],[-10.2590105,10.126305],[-10.2587536,10.1259193],[-10.258697,10.1252936],[-10.2587493,10.1246465],[-10.2587145,10.1237379],[-10.2586709,10.1231722],[-10.2585621,10.122645],[-10.2582356,10.1220451],[-10.2577175,10.1216851],[-10.2573997,10.1213936],[-10.257526,10.1208965],[-10.257822,10.1206008],[-10.258462,10.1204422],[-10.2592282,10.1204422],[-10.259673,10.120418],[-10.2599378,10.1204036],[-10.261566,10.1201765],[-10.2625803,10.1198851],[-10.2636382,10.1193965],[-10.2644741,10.1189808],[-10.2651924,10.1184279],[-10.2655189,10.1179822],[-10.2658672,10.1173908],[-10.2661458,10.1168979],[-10.2663939,10.1167093],[-10.2669512,10.1167822],[-10.2676869,10.1174208],[-10.2683051,10.1184365],[-10.268784,10.1193665],[-10.2692455,10.1202193],[-10.2697722,10.1205193],[-10.2702903,10.1203993],[-10.2711392,10.1201593],[-10.272528,10.1199536],[-10.2736555,10.1198636],[-10.274265,10.1201165],[-10.2747961,10.1201765],[-10.2753136,10.1200076],[-10.2756102,10.1199108],[-10.2763982,10.1195208],[-10.2774082,10.1189508],[-10.2784269,10.1186251],[-10.279254,10.1185822],[-10.2799027,10.1189679],[-10.2804122,10.1194071],[-10.2807081,10.1196622],[-10.2818182,10.1210679],[-10.2825844,10.1221565],[-10.2830067,10.1229279],[-10.2832679,10.1233908],[-10.2838121,10.1232965],[-10.2843693,10.1229965],[-10.2849701,10.1226622],[-10.2855448,10.122375],[-10.2855186,10.1218908],[-10.2852139,10.1213551],[-10.2845914,10.1206651],[-10.2839471,10.1200051],[-10.2833245,10.1186722],[-10.2827281,10.1173308],[-10.2822753,10.1164865],[-10.282123,10.1159893],[-10.2820359,10.1155522],[-10.2826454,10.1148922],[-10.2831591,10.1142536],[-10.2834638,10.1136193],[-10.2836989,10.1128993],[-10.2841342,10.1119907],[-10.2843563,10.1111678],[-10.2845174,10.1105163],[-10.2843867,10.1100663],[-10.2840864,10.1092306],[-10.283725,10.1082834],[-10.2835378,10.1075119],[-10.2835335,10.1068219],[-10.2835552,10.1063805],[-10.2844564,10.1054804],[-10.2855796,10.104349],[-10.286176,10.1034918],[-10.2864546,10.1030546],[-10.2863153,10.1025617],[-10.2861194,10.1020345],[-10.2859105,10.1017217],[-10.2859671,10.1015545],[-10.2865765,10.1015159],[-10.2870336,10.1018502],[-10.2874733,10.1025574],[-10.2877084,10.1033246],[-10.2877824,10.1037146],[-10.2879958,10.1044775],[-10.2883963,10.1048675],[-10.288701,10.1049276],[-10.2895717,10.1045718],[-10.2904642,10.1042032],[-10.2910911,10.1041004],[-10.291657,10.1038004],[-10.2919226,10.1036718],[-10.2919922,10.1031703],[-10.2920575,10.1024674],[-10.2924972,10.1018717],[-10.2929805,10.1012802],[-10.2931589,10.1009073],[-10.2933766,10.1003887],[-10.2933418,10.0994972],[-10.2931198,10.0985072],[-10.2929848,10.0975085],[-10.2930414,10.0972471],[-10.2932199,10.0969985],[-10.2937162,10.0967156],[-10.2940296,10.0962656],[-10.294256,10.095657],[-10.2944432,10.0951469],[-10.2947973,10.0948523],[-10.2955465,10.09462],[-10.2965039,10.094699],[-10.2970344,10.0948666],[-10.2981891,10.094772],[-10.2992915,10.0944956],[-10.2995723,10.0942102],[-10.2993388,10.0930412],[-10.2992743,10.0922311],[-10.2993712,10.0911469],[-10.299646,10.0900913],[-10.2998764,10.0897529],[-10.3005337,10.0892131],[-10.3010005,10.089034],[-10.3016646,10.0886893],[-10.3023497,10.0884677],[-10.3029921,10.0885193],[-10.30375,10.0889339],[-10.3045749,10.08965],[-10.3050022,10.0901751],[-10.306032,10.0909664],[-10.3083268,10.092196],[-10.3088371,10.0923696],[-10.3099959,10.092416],[-10.310777,10.0923645],[-10.3112804,10.092236],[-10.3124593,10.0916083],[-10.3135618,10.0907952],[-10.3141453,10.0904018],[-10.3151986,10.0899255],[-10.3155123,10.0898049],[-10.3162164,10.0896844],[-10.3170041,10.0898002],[-10.3172318,10.0903084],[-10.3171851,10.0908645],[-10.3168348,10.0918049],[-10.3165617,10.0923343],[-10.3163621,10.0930979],[-10.3162306,10.0940265],[-10.3163551,10.0944513],[-10.3167745,10.0948712],[-10.3173578,10.0953281],[-10.3176566,10.0956241],[-10.318704,10.0961457],[-10.3197012,10.0964854],[-10.3203676,10.0965823],[-10.321489,10.096587],[-10.3221771,10.0966372],[-10.3226986,10.0966433],[-10.3231556,10.0964746],[-10.3235054,10.0960844],[-10.3236292,10.0956752],[-10.3234789,10.0950568],[-10.3225783,10.0937267],[-10.3222439,10.0925758],[-10.3218527,10.0916303],[-10.3213614,10.090796],[-10.3193311,10.0885297],[-10.3188715,10.0881401],[-10.3186622,10.0877337],[-10.3185897,10.0873398],[-10.3187239,10.086981],[-10.3187503,10.0861504],[-10.318657,10.0856811],[-10.3187477,10.0847099],[-10.3191325,10.0839898],[-10.3197289,10.0835499],[-10.3206122,10.0830759],[-10.3217408,10.0827511],[-10.3226517,10.0826508],[-10.3234249,10.0807614],[-10.3239832,10.0801004],[-10.3243962,10.0796142],[-10.3246854,10.0791461],[-10.3249526,10.0788136],[-10.3250939,10.0784144],[-10.3251908,10.0770016],[-10.3250235,10.0765573],[-10.3248107,10.0761911],[-10.3250303,10.0755582],[-10.3249492,10.0749302],[-10.3247035,10.0744055],[-10.3243918,10.0741652],[-10.3235832,10.0739472],[-10.3231933,10.0736973],[-10.3229938,10.0733362],[-10.3228737,10.0728755],[-10.3230796,10.0722878],[-10.3234669,10.0719584],[-10.3238187,10.0717656],[-10.3253572,10.0713914],[-10.3264507,10.0697432],[-10.3266127,10.0688792],[-10.3264777,10.0681614],[-10.3256947,10.0674835],[-10.3242907,10.0667525],[-10.3234807,10.0659549],[-10.3233997,10.0656891],[-10.3237102,10.0650643],[-10.3236983,10.0644264],[-10.3235988,10.0639918],[-10.323309,10.0635169],[-10.3228179,10.0632756],[-10.3222653,10.0631641],[-10.3219708,10.0629691],[-10.321659,10.0621184],[-10.3222943,10.061309],[-10.3221441,10.0599334],[-10.3220938,10.059069],[-10.3218575,10.0584836],[-10.3212699,10.0575256],[-10.3210429,10.0570453],[-10.3206113,10.0566442],[-10.3202369,10.0557955],[-10.3199229,10.0544799],[-10.319397,10.0530301],[-10.3191269,10.0522552],[-10.3188256,10.0517203],[-10.3182804,10.0515977],[-10.31766,10.0513278],[-10.3177169,10.0507756],[-10.3181596,10.0500529],[-10.3181807,10.0493087],[-10.3183559,10.048417],[-10.3186708,10.0477278],[-10.3189117,10.0474948],[-10.3193031,10.0474881],[-10.3196405,10.0477141],[-10.3199985,10.0482892],[-10.3204375,10.0485813],[-10.3215213,10.0487034],[-10.3221268,10.0486877],[-10.3228417,10.0485072],[-10.3232343,10.0482732],[-10.3234996,10.0479014],[-10.3234752,10.0475357],[-10.3231364,10.0471012],[-10.3229395,10.0464267],[-10.3229289,10.0458593],[-10.3230119,10.045339],[-10.3232505,10.0450613],[-10.3237652,10.0450369],[-10.3240741,10.0451845],[-10.3244107,10.0451866],[-10.3249334,10.045019],[-10.3253668,10.0446793],[-10.325625,10.0442312],[-10.3256934,10.0438478],[-10.3255016,10.0433689],[-10.3252128,10.0427594],[-10.3251414,10.0422523],[-10.325202,10.0418521],[-10.3253973,10.0415184],[-10.3256351,10.041261],[-10.3257913,10.0404034],[-10.3256168,10.0399497],[-10.3251085,10.0392284],[-10.3248452,10.0390046],[-10.3244451,10.038939],[-10.3237343,10.0390799],[-10.3232813,10.0389252],[-10.3228767,10.0385974],[-10.3222625,10.0374973],[-10.3222116,10.0371091],[-10.3224882,10.0363516],[-10.3232913,10.0358665],[-10.3238855,10.0357493],[-10.324428,10.0357935],[-10.3250322,10.0359255],[-10.3253921,10.0358999],[-10.3258601,10.035752],[-10.3262689,10.0354518],[-10.3271543,10.0350504],[-10.3282772,10.0347051],[-10.3292885,10.0333342],[-10.3293029,10.0329137],[-10.3290589,10.0324407],[-10.328736,10.032052],[-10.3280928,10.03053],[-10.3271478,10.0288865],[-10.3271653,10.0286009],[-10.3274426,10.0284466],[-10.3285762,10.0286092],[-10.330132,10.0285228],[-10.3304517,10.0285392],[-10.3311252,10.0285737],[-10.3316102,10.0284845],[-10.3322736,10.0278759],[-10.3327835,10.0269808],[-10.3336981,10.02564],[-10.3341487,10.0248052],[-10.3350775,10.022575],[-10.335334,10.022023],[-10.3356653,10.0216191],[-10.3366274,10.0208829],[-10.3369891,10.0209456],[-10.3373003,10.0214481],[-10.3382612,10.0222349],[-10.3387112,10.0224951],[-10.3391304,10.0225042],[-10.3395571,10.0224229],[-10.3405439,10.0223],[-10.3409088,10.0220236],[-10.3416241,10.0213695],[-10.342687,10.0207125],[-10.3433443,10.0205327],[-10.3443462,10.0201321],[-10.3450635,10.0196093],[-10.345639,10.0190876],[-10.3461963,10.0185163],[-10.3469814,10.0179353],[-10.3474023,10.0174098],[-10.3476312,10.0165343],[-10.3475961,10.0161516],[-10.3473971,10.0158299],[-10.3470175,10.0153036],[-10.3464492,10.0147864],[-10.3460502,10.0147601],[-10.3455828,10.0148793],[-10.3450736,10.0150853],[-10.3439714,10.0158143],[-10.3437766,10.0161552],[-10.3433657,10.0162942],[-10.3428914,10.0162219],[-10.3425842,10.0157319],[-10.343097,10.0135256],[-10.3435504,10.011837],[-10.3439979,10.0112655],[-10.3446879,10.0107913],[-10.3451938,10.010702],[-10.3466095,10.0110292],[-10.3473883,10.0110477],[-10.3478745,10.0112465],[-10.3482772,10.0115899],[-10.3487221,10.0116067],[-10.3491879,10.0115199],[-10.3510353,10.0114995],[-10.3515807,10.0115316],[-10.351889,10.0114578],[-10.3522756,10.0106083],[-10.3523592,10.0099903],[-10.3520379,10.0089148],[-10.3516052,10.0074986],[-10.3514917,10.0067896],[-10.3517755,10.0061687],[-10.3524602,10.0050043],[-10.3530318,10.0042858],[-10.3537511,10.0038554],[-10.3550753,10.0037139],[-10.3558819,10.0038276],[-10.3569636,10.0042756],[-10.3574935,10.00469],[-10.3579861,10.0045356],[-10.3581096,10.0040141],[-10.3579917,10.0021012],[-10.3578341,10.0014907],[-10.357554,10.0009693],[-10.3569111,10.0002918],[-10.3558553,9.9994697],[-10.3549503,9.9984846],[-10.3545931,9.9978572],[-10.3545942,9.9974507],[-10.3547463,9.9970894],[-10.3546761,9.9968696],[-10.3543075,9.9967559],[-10.3539389,9.9967789],[-10.353457,9.9969666],[-10.3528203,9.9972911],[-10.3518052,9.9989175],[-10.3515818,9.9998162],[-10.3515239,10.0002851],[-10.3507821,10.0010363],[-10.350616,10.0013535],[-10.3502627,10.0014124],[-10.3498777,10.0013109],[-10.3495153,10.0011175],[-10.3491343,10.0006455],[-10.3485865,9.9993603],[-10.348482,9.9987461],[-10.3489334,9.998478],[-10.3495988,9.9983343],[-10.3502166,9.9980579],[-10.3505896,9.9976183],[-10.3512006,9.9961733],[-10.351568,9.9956276],[-10.3521684,9.9949703],[-10.3527182,9.9945538],[-10.3530679,9.9944435],[-10.3534075,9.994561],[-10.3537787,9.9944645],[-10.3547233,9.9938248],[-10.3550976,9.993173],[-10.3556682,9.9923105],[-10.35587,9.9918685],[-10.3561489,9.9907841],[-10.3565076,9.9904182],[-10.3565973,9.9900594],[-10.3565468,9.9893674],[-10.3561951,9.9893291],[-10.355385,9.9894444],[-10.3548611,9.9891396],[-10.3542686,9.9883425],[-10.3538878,9.988195],[-10.3526487,9.9880156],[-10.3520809,9.9879623],[-10.3517726,9.9877849],[-10.3515907,9.9873949],[-10.3515965,9.9869884],[-10.3522766,9.9857939],[-10.3523127,9.985324],[-10.3521963,9.9850406],[-10.351426,9.9849782],[-10.3509409,9.9847671],[-10.3507018,9.9845855],[-10.3501366,9.9844282],[-10.3497625,9.9837203],[-10.3497323,9.9836631],[-10.3503468,9.9827961],[-10.3504607,9.9823939],[-10.350111,9.9817405],[-10.3498174,9.9809524],[-10.3495415,9.9807426],[-10.3479776,9.980222],[-10.347733,9.9799889],[-10.3474994,9.9789882],[-10.3471179,9.9783057],[-10.3472558,9.9776992],[-10.347467,9.977195],[-10.3484319,9.9760554],[-10.3486699,9.975913],[-10.3493441,9.9759022],[-10.3499993,9.9760145],[-10.3505283,9.9763857],[-10.3508355,9.9762885],[-10.3510193,9.9760571],[-10.3507929,9.9757281],[-10.3499169,9.975208],[-10.3494688,9.9750954],[-10.349243,9.9747981],[-10.3490409,9.9743443],[-10.3488838,9.9742141],[-10.3488599,9.9739459],[-10.3493297,9.9733231],[-10.3495068,9.9729743],[-10.3494349,9.9717],[-10.3491558,9.9708555],[-10.3488444,9.9701743],[-10.348521,9.9688211],[-10.3481649,9.9664333],[-10.3478968,9.9659045],[-10.3474599,9.9653333],[-10.3473943,9.9649636],[-10.3469884,9.9646017],[-10.3451889,9.9638014],[-10.3449618,9.96354],[-10.3444263,9.9624034],[-10.3441426,9.9618512],[-10.3437379,9.9613968],[-10.343576,9.9609083],[-10.3434366,9.9595078],[-10.3432881,9.9588077],[-10.3429148,9.9581785],[-10.3424266,9.9577819],[-10.3412101,9.9570178],[-10.340571,9.9566189],[-10.3402583,9.9553448],[-10.3402943,9.9548575],[-10.3405419,9.9546715],[-10.3410436,9.9547933],[-10.3414778,9.9547266],[-10.3417442,9.9545102],[-10.3419449,9.9541895],[-10.3420647,9.9538554],[-10.3420009,9.9532895],[-10.3421847,9.9528295],[-10.3426473,9.952334],[-10.3431671,9.9521477],[-10.3435785,9.9516868],[-10.3437178,9.9510378],[-10.3434927,9.9507564],[-10.3430744,9.950568],[-10.3425054,9.9496576],[-10.3423908,9.949035],[-10.3425909,9.9484277],[-10.3426493,9.9476543],[-10.3425187,9.9468077],[-10.3416867,9.9445264],[-10.3410882,9.9436731],[-10.3404699,9.9416908],[-10.3400539,9.9407436],[-10.3399346,9.9401419],[-10.3400362,9.9395673],[-10.340775,9.9382409],[-10.3409249,9.937282],[-10.3408867,9.9369],[-10.3410823,9.9366109],[-10.3409402,9.9363622],[-10.340541,9.9361803],[-10.3400222,9.936116],[-10.3394481,9.9361768],[-10.3387302,9.9358257],[-10.3382717,9.9348858],[-10.3381864,9.9345708],[-10.3382719,9.9339016],[-10.3383572,9.9333411],[-10.3385354,9.9328741],[-10.3390156,9.9324767],[-10.339253,9.9318092],[-10.3391954,9.9310765],[-10.3391961,9.9301889],[-10.3394919,9.9297027],[-10.3399905,9.9295217],[-10.3401564,9.9293273],[-10.3402846,9.9288722],[-10.3401869,9.928565],[-10.3395132,9.9279907],[-10.3392845,9.9276023],[-10.3391669,9.9269967],[-10.3393644,9.9265566],[-10.3392878,9.9261638],[-10.3389774,9.9259305],[-10.3377737,9.9259571],[-10.3370015,9.9254345],[-10.3364577,9.9244784],[-10.3362892,9.9239959],[-10.3361431,9.9224019],[-10.336281,9.922197],[-10.3366695,9.922003],[-10.3376146,9.9219016],[-10.3382404,9.9215123],[-10.3384299,9.9211738],[-10.3385831,9.9204998],[-10.3383766,9.9192146],[-10.3378966,9.9182256],[-10.3376006,9.9171984],[-10.3372008,9.9165608],[-10.3367021,9.9151527],[-10.336374,9.9144489],[-10.3359781,9.913763],[-10.3353188,9.9132136],[-10.3344951,9.9125273],[-10.3340104,9.9119856],[-10.3332286,9.9113871],[-10.3330087,9.9103501],[-10.3333425,9.9099302],[-10.3337926,9.9097512],[-10.3350789,9.9096387],[-10.3369873,9.9098499],[-10.3376316,9.9097533],[-10.3385516,9.9095057],[-10.340086,9.9092003],[-10.3411259,9.9086381],[-10.341379,9.9083578],[-10.3417939,9.9071874],[-10.3417506,9.906644],[-10.3416418,9.9062708],[-10.3412143,9.9062702],[-10.3403443,9.9068544],[-10.3399102,9.9067877],[-10.3394515,9.9062177],[-10.3388803,9.9058116],[-10.3385475,9.9057599],[-10.3381382,9.9060801],[-10.3374232,9.9061148],[-10.3370072,9.9060038],[-10.3364609,9.9056005],[-10.3364587,9.9051855],[-10.3361553,9.904496],[-10.3357882,9.9040739],[-10.3352045,9.9037654],[-10.3346025,9.9036377],[-10.3336094,9.9035721],[-10.3331296,9.9032832],[-10.3327622,9.9028349],[-10.3327588,9.9023548],[-10.3329102,9.9020451],[-10.3331105,9.9016355],[-10.3332177,9.9008477],[-10.3334123,9.9004418],[-10.3340162,9.8997386],[-10.3348089,9.8994738],[-10.3352008,9.8991102],[-10.3355061,9.8987201],[-10.3358065,9.8980996],[-10.3363293,9.8977218],[-10.3369412,9.8972336],[-10.3371106,9.8967398],[-10.3367644,9.8959026],[-10.3362631,9.894968],[-10.3360938,9.8946907],[-10.335731,9.8923766],[-10.3354742,9.8916342],[-10.335453,9.8907819],[-10.335273,9.8905985],[-10.3349556,9.8904781],[-10.333237,9.8904009],[-10.3320104,9.8897998],[-10.3315727,9.8898957],[-10.3312755,9.8897691],[-10.3310675,9.8895221],[-10.3311136,9.8891186],[-10.3313507,9.8882383],[-10.3311591,9.8873909],[-10.3307254,9.8866043],[-10.3306619,9.886489],[-10.3304468,9.8859631],[-10.330248,9.8850158],[-10.3303113,9.8845379],[-10.330988,9.8833219],[-10.3313675,9.882239],[-10.3318834,9.8805823],[-10.3320967,9.8795427],[-10.3323181,9.8793539],[-10.3325445,9.8792785],[-10.3328467,9.8794537],[-10.3332678,9.8800546],[-10.3336354,9.8803249],[-10.3337868,9.8806622],[-10.3339274,9.8816168],[-10.334143,9.8820684],[-10.3344451,9.8822752],[-10.3348492,9.8822729],[-10.3351808,9.882192],[-10.3353683,9.8819865],[-10.3353126,9.8816959],[-10.3350912,9.8812182],[-10.3350021,9.8807825],[-10.3350966,9.880352],[-10.3356495,9.8796578],[-10.336827,9.8792846],[-10.3380964,9.879534],[-10.3385658,9.8791148],[-10.3390145,9.8783928],[-10.3405189,9.877239],[-10.3407594,9.8769525],[-10.3410428,9.8764328],[-10.34205,9.8753758],[-10.3424759,9.8747876],[-10.3428131,9.8745734],[-10.3437282,9.8751467],[-10.3440624,9.8758599],[-10.3443966,9.877233],[-10.3448865,9.8779372],[-10.3454182,9.8784041],[-10.3458688,9.8782431],[-10.3458505,9.877932],[-10.3452201,9.8772204],[-10.3451634,9.8767729],[-10.345453,9.8764138],[-10.346608,9.876574],[-10.3473209,9.8762082],[-10.3475165,9.8755825],[-10.3474105,9.8751688],[-10.346583,9.8746655],[-10.3465245,9.8741111],[-10.3470192,9.8737541],[-10.3472438,9.8732109],[-10.3471298,9.8726265],[-10.3466839,9.8721001],[-10.3464055,9.8712811],[-10.3451749,9.8699653],[-10.3443166,9.8686796],[-10.343693,9.8680952],[-10.3433826,9.8675907],[-10.34317,9.8662246],[-10.3431842,9.865927],[-10.3439925,9.8643651],[-10.3442068,9.8640609],[-10.3445394,9.8637153],[-10.3449995,9.8637951],[-10.3452644,9.8640224],[-10.3457549,9.8641153],[-10.3462656,9.8640787],[-10.3471006,9.8642538],[-10.3482517,9.8645704],[-10.34862,9.8647707],[-10.3491749,9.8652942],[-10.3502649,9.8666893],[-10.3505991,9.8667396],[-10.3509305,9.8666402],[-10.3511945,9.8664827],[-10.3519123,9.8653398],[-10.3520824,9.8636823],[-10.3523036,9.8627585],[-10.352112,9.8625735],[-10.3515327,9.8622931],[-10.3513239,9.8619862],[-10.3513206,9.8617374],[-10.3515212,9.8614386],[-10.3514479,9.8609406],[-10.3509385,9.8603886],[-10.3498876,9.8597515],[-10.3493464,9.8596539],[-10.3492644,9.8594475],[-10.3493635,9.859237],[-10.350471,9.8588987],[-10.3513806,9.8590751],[-10.3521734,9.8590379],[-10.3528436,9.8589528],[-10.3537118,9.8585399],[-10.3542507,9.8581215],[-10.3548107,9.8573792],[-10.3550891,9.8572884],[-10.3558571,9.8573592],[-10.3568393,9.8576187],[-10.3577162,9.8576417],[-10.3587419,9.8578218],[-10.3591662,9.8583891],[-10.3596059,9.8585275],[-10.3602773,9.8584211],[-10.3604006,9.8587639],[-10.3604312,9.8595094],[-10.3601817,9.860142],[-10.360005,9.8607823],[-10.3602829,9.8611183],[-10.3608769,9.8612987],[-10.361909,9.8614044],[-10.3622399,9.8613191],[-10.362439,9.8611894],[-10.3626018,9.8608422],[-10.3626972,9.8601465],[-10.3626535,9.8588437],[-10.3622897,9.857321],[-10.3622315,9.8566725],[-10.3623226,9.8560735],[-10.3627912,9.8551402],[-10.364415,9.8538395],[-10.365108,9.8534021],[-10.3665087,9.8527783],[-10.3671786,9.8527225],[-10.3677944,9.8528369],[-10.3682954,9.8530555],[-10.3684973,9.8529839],[-10.3687332,9.8525224],[-10.3687432,9.8519776],[-10.3685047,9.850592],[-10.3679633,9.8493147],[-10.3680841,9.8480498],[-10.3694862,9.8440976],[-10.3698993,9.84057],[-10.3704845,9.838433],[-10.3719993,9.836703],[-10.3715518,9.8347017],[-10.3717871,9.8341994],[-10.3725846,9.8324969],[-10.372619,9.8304616],[-10.3727567,9.8278496],[-10.3720682,9.8252377],[-10.3714485,9.8226596],[-10.3710944,9.822396],[-10.3697616,9.8214045],[-10.3699681,9.8203529],[-10.3717928,9.8173677],[-10.3729633,9.8152306],[-10.373342,9.8139755],[-10.3732387,9.8134666],[-10.3719256,9.812143],[-10.3720544,9.8113713],[-10.3723584,9.8103609],[-10.3733683,9.8083656],[-10.3738269,9.8077411],[-10.3740794,9.8074009],[-10.3742391,9.8069236],[-10.37427,9.8064159],[-10.3743422,9.8056797],[-10.3744916,9.8048419],[-10.3747441,9.8047251],[-10.3760271,9.8044103],[-10.3772946,9.8027704],[-10.3772585,9.8023489],[-10.3746771,9.7996833],[-10.3733147,9.7988168],[-10.372884,9.7983276],[-10.3726779,9.7977894],[-10.37258,9.7966775],[-10.372276,9.7953726],[-10.3715701,9.795073],[-10.3712815,9.7947683],[-10.3713227,9.7938595],[-10.3712019,9.793364],[-10.3705138,9.7929963],[-10.3701958,9.7926205],[-10.3699006,9.7911531],[-10.3698439,9.7899548],[-10.369509,9.7895385],[-10.3678344,9.7894826],[-10.3670667,9.7896908],[-10.3666493,9.7901681],[-10.3663556,9.7904575],[-10.3660001,9.7904423],[-10.3655312,9.7898381],[-10.3652375,9.7892186],[-10.3655827,9.7881472],[-10.3652942,9.7872993],[-10.3647274,9.7866798],[-10.3642276,9.7859537],[-10.3636093,9.7847757],[-10.3628364,9.7838008],[-10.3624087,9.7828614],[-10.3622696,9.7824146],[-10.3625788,9.782181],[-10.3630734,9.781988],[-10.3639803,9.7818408],[-10.3646965,9.7819728],[-10.3672419,9.7830848],[-10.3682003,9.7831915],[-10.3692772,9.7832676],[-10.3697203,9.782836],[-10.3702458,9.7826481],[-10.3714876,9.7830747],[-10.3722502,9.7830899],[-10.3725697,9.78277],[-10.3727912,9.7820287],[-10.3728582,9.7802921],[-10.3729973,9.7799976],[-10.3732601,9.7798351],[-10.3735229,9.7798199],[-10.3735744,9.7800027],[-10.3737342,9.7802667],[-10.3739609,9.7804444],[-10.3743061,9.7805307],[-10.3745277,9.7804698],[-10.3748007,9.779957],[-10.3749244,9.7790024],[-10.3751357,9.7783778],[-10.3754448,9.7779767],[-10.375528,9.7769556],[-10.3753212,9.7762401],[-10.375249,9.7756409],[-10.3754757,9.7748437],[-10.3759305,9.7738324],[-10.3762435,9.773427],[-10.3769854,9.7731223],[-10.3774183,9.7726805],[-10.377408,9.7719036],[-10.3774852,9.7715228],[-10.3785272,9.7706846],[-10.3797266,9.7697201],[-10.3798451,9.7693241],[-10.3798039,9.7682679],[-10.3795411,9.7679632],[-10.3792114,9.7677905],[-10.378964,9.7674249],[-10.3787978,9.766892],[-10.3785518,9.7657898],[-10.3785415,9.7648606],[-10.3792835,9.7628751],[-10.3792835,9.7618697],[-10.3795051,9.7615345],[-10.38001,9.7611537],[-10.3804076,9.7604967],[-10.3804892,9.7601076],[-10.3804274,9.7598283],[-10.3800564,9.7594322],[-10.3798091,9.7593256],[-10.3796184,9.7591885],[-10.3793711,9.7582795],[-10.3792268,9.7574111],[-10.3795051,9.7566139],[-10.379639,9.7560604],[-10.3796596,9.7553545],[-10.3797885,9.7549381],[-10.3807417,9.7547452],[-10.381427,9.7547756],[-10.3819628,9.7553698],[-10.3825706,9.7568281],[-10.3831067,9.7575127],[-10.3837044,9.757919],[-10.384467,9.7579342],[-10.3848019,9.7583049],[-10.3851265,9.7589244],[-10.3852347,9.7596912],[-10.3850802,9.7602853],[-10.3851472,9.7604072],[-10.3855542,9.7606408],[-10.3861365,9.7607373],[-10.3867857,9.760783],[-10.3870948,9.7606916],[-10.3876204,9.7604377],[-10.3883572,9.7603767],[-10.3887179,9.7604326],[-10.3889652,9.7603209],[-10.3890599,9.760001],[-10.3891713,9.758767],[-10.3894238,9.758051],[-10.3893568,9.7563295],[-10.3900782,9.75441],[-10.3903461,9.7540393],[-10.3906553,9.7540952],[-10.3909541,9.7543186],[-10.3920156,9.7552682],[-10.3927163,9.7556795],[-10.3951226,9.7557811],[-10.3953493,9.7556998],[-10.3960088,9.7553545],[-10.3962716,9.7552276],[-10.396385,9.7550651],[-10.3966684,9.7549077],[-10.3970754,9.7549737],[-10.3972918,9.7548823],[-10.3974155,9.7545928],[-10.3973124,9.7537041],[-10.3974516,9.7533233],[-10.3976216,9.7531354],[-10.3981626,9.7529323],[-10.3984151,9.752912],[-10.3987242,9.7536026],[-10.3988273,9.7543338],[-10.3984666,9.7549026],[-10.3980956,9.7554815],[-10.3978122,9.7564869],[-10.3972248,9.7578631],[-10.3976628,9.7592392],[-10.3978792,9.7594779],[-10.3982966,9.7594017],[-10.3985439,9.7591682],[-10.3992601,9.7581881],[-10.3999248,9.7574873],[-10.4012542,9.7568678],[-10.4014654,9.7564057],[-10.4012799,9.7557201],[-10.4009914,9.7545116],[-10.4007904,9.7536229],[-10.4008935,9.7530186],[-10.401146,9.7524245],[-10.4015221,9.7519116],[-10.4025917,9.7505318],[-10.4013844,9.7502839],[-10.402027,9.7497149],[-10.4024238,9.748943],[-10.4026453,9.7481609],[-10.4024547,9.7469168],[-10.4031606,9.7458351],[-10.404155,9.7450175],[-10.4049588,9.7442761],[-10.4052578,9.7436405],[-10.4043354,9.7413307],[-10.4046394,9.7399291],[-10.4042684,9.7396142],[-10.4039695,9.7389642],[-10.4038613,9.738695],[-10.4038459,9.7382938],[-10.4041293,9.7381212],[-10.4044796,9.7379739],[-10.4047888,9.7378317],[-10.4049949,9.7375219],[-10.404897,9.7371563],[-10.4047836,9.7369024],[-10.4046858,9.7365469],[-10.4047167,9.7361457],[-10.405067,9.7357699],[-10.4057111,9.7354601],[-10.4065458,9.7353585],[-10.4074682,9.7352163],[-10.4087408,9.7346933],[-10.4106937,9.7341448],[-10.4117603,9.7339214],[-10.4119561,9.7337893],[-10.412023,9.7335913],[-10.4119818,9.733251],[-10.4112656,9.732088],[-10.4110183,9.7318544],[-10.410874,9.7317681],[-10.4108431,9.7315294],[-10.4109152,9.7312196],[-10.4110698,9.7308337],[-10.4110544,9.7305442],[-10.4100702,9.729107],[-10.4091737,9.7272432],[-10.4091015,9.7269232],[-10.4092406,9.7267404],[-10.4094828,9.7265525],[-10.4106473,9.7260751],[-10.4111471,9.7259532],[-10.4117293,9.7259938],[-10.4121931,9.726131],[-10.4124971,9.7260396],[-10.4129557,9.7257755],[-10.4132184,9.7255622],[-10.4133885,9.7249477],[-10.4134864,9.7240995],[-10.4134297,9.7224338],[-10.4127186,9.7216618],[-10.4120694,9.7207578],[-10.4115439,9.7197523],[-10.4114956,9.7194453],[-10.4115078,9.7190413],[-10.4116366,9.7185232],[-10.4116263,9.7181119],[-10.4115439,9.7178224],[-10.4109358,9.7175227],[-10.4104051,9.7175126],[-10.4100187,9.7174059],[-10.4097349,9.7171149],[-10.4095962,9.7166644],[-10.4098435,9.7162175],[-10.4099981,9.7159026],[-10.410029,9.7156639],[-10.4098074,9.7153135],[-10.4096683,9.7151053],[-10.4096322,9.7148666],[-10.4097353,9.7146177],[-10.4099311,9.714506],[-10.4101836,9.7145619],[-10.4104567,9.7148717],[-10.41057,9.7151612],[-10.4107349,9.7154049],[-10.4109616,9.7155268],[-10.4112553,9.7155624],[-10.4114923,9.7155268],[-10.4116469,9.7154202],[-10.4118891,9.7149986],[-10.4120076,9.7147955],[-10.4122858,9.7145162],[-10.4123064,9.7143028],[-10.4121158,9.7140997],[-10.4118633,9.7140286],[-10.4116933,9.7139372],[-10.4115748,9.7137696],[-10.4115439,9.713602],[-10.4115439,9.7134496],[-10.4116314,9.7132871],[-10.4117345,9.7131144],[-10.4120797,9.7128808],[-10.4121828,9.7126726],[-10.4122085,9.7124339],[-10.4121209,9.7121393],[-10.4119921,9.7119971],[-10.4118272,9.711926],[-10.4114717,9.7120784],[-10.4112553,9.7121647],[-10.4108483,9.7121292],[-10.4106164,9.7121393],[-10.4104618,9.7122155],[-10.4103588,9.7123171],[-10.4102609,9.7125253],[-10.4102093,9.7127335],[-10.4101011,9.7128097],[-10.4099517,9.7128249],[-10.4098693,9.7127691],[-10.4098693,9.7126218],[-10.4099053,9.7124034],[-10.4099775,9.7122155],[-10.4099929,9.711799],[-10.4098126,9.7111794],[-10.4094674,9.7104227],[-10.4088645,9.709732],[-10.4084008,9.7094831],[-10.4081328,9.7092139],[-10.4081586,9.7089651],[-10.4083132,9.7087111],[-10.4084832,9.7086197],[-10.4086842,9.7087518],[-10.4087821,9.7089702],[-10.4088954,9.7093003],[-10.4090397,9.7094577],[-10.4091737,9.7094526],[-10.4093488,9.7094628],[-10.4094674,9.7093765],[-10.4095498,9.7092444],[-10.409488,9.7090362],[-10.4094416,9.708828],[-10.4093849,9.7085029],[-10.4093952,9.7082794],[-10.4095343,9.7079239],[-10.409792,9.7076395],[-10.4100599,9.7074364],[-10.4101527,9.7074313],[-10.4103278,9.7075176],[-10.4105443,9.7074618],[-10.41057,9.7072992],[-10.4104257,9.7069336],[-10.4104618,9.7066542],[-10.4105752,9.706512],[-10.4107246,9.706385],[-10.4109719,9.7062682],[-10.411379,9.7059787],[-10.4117654,9.7056486],[-10.4118736,9.7054455],[-10.4119148,9.7051864],[-10.4116005,9.7043027],[-10.4112965,9.703739],[-10.4109874,9.7036475],[-10.4103948,9.7037491],[-10.4102196,9.7036831],[-10.4100548,9.7033885],[-10.4098796,9.7028146],[-10.4098332,9.7024438],[-10.4099002,9.7022254],[-10.4107504,9.7019715],[-10.4110904,9.7016769],[-10.4118685,9.7005088],[-10.4120179,9.700006],[-10.4120127,9.6995996],[-10.4118272,9.6990308],[-10.4116624,9.6989292],[-10.4115129,9.698914],[-10.4113996,9.6989953],[-10.4112192,9.6990003],[-10.4110698,9.6989445],[-10.410941,9.6988429],[-10.4108998,9.6986753],[-10.4108998,9.6984112],[-10.4108792,9.6981623],[-10.410807,9.6980506],[-10.4106628,9.6979439],[-10.4104567,9.6978779],[-10.4101939,9.6977966],[-10.4100496,9.6977357],[-10.4099105,9.6975731],[-10.4099002,9.6974259],[-10.4099156,9.6972633],[-10.4099723,9.6971567],[-10.410096,9.6970449],[-10.4102454,9.696923],[-10.4103485,9.6967808],[-10.4103794,9.6966285],[-10.4103175,9.6965523],[-10.4102042,9.6963085],[-10.4102502,9.6959883],[-10.4106009,9.6955669],[-10.4109307,9.6953232],[-10.4111213,9.6952267],[-10.4112811,9.6953943],[-10.4115645,9.6959326],[-10.4118221,9.6961104],[-10.4121209,9.6962526],[-10.4123064,9.6963542],[-10.4125125,9.6963288],[-10.4127444,9.6962882],[-10.4128681,9.6962018],[-10.4128887,9.6959733],[-10.4129608,9.6955212],[-10.4131463,9.6952724],[-10.4133679,9.6952013],[-10.4143623,9.6951657],[-10.4146354,9.695054],[-10.4147591,9.6949524],[-10.414857,9.6947391],[-10.4149188,9.6945105],[-10.4151352,9.6942312],[-10.4152589,9.694094],[-10.4153671,9.6939112],[-10.4153619,9.6937639],[-10.4152795,9.6936522],[-10.4150631,9.6936318],[-10.4148467,9.6937741],[-10.414723,9.6939213],[-10.4145427,9.6941042],[-10.4143623,9.6941753],[-10.4141356,9.6941855],[-10.4139759,9.6940483],[-10.4137595,9.6937436],[-10.4135173,9.6934846],[-10.4133524,9.6933525],[-10.413069,9.6933576],[-10.4128629,9.6934693],[-10.4128062,9.6936115],[-10.4127496,9.693708],[-10.412595,9.6937436],[-10.4123374,9.6936674],[-10.4121364,9.6935607],[-10.4119767,9.6935049],[-10.4119045,9.6933677],[-10.4119561,9.6931392],[-10.412023,9.6929259],[-10.4121416,9.692423],[-10.4122549,9.6921843],[-10.4124404,9.6920777],[-10.412595,9.6914834],[-10.412461,9.6911228],[-10.4122395,9.6909806],[-10.4118942,9.6910466],[-10.4115748,9.6913006],[-10.4113171,9.6915545],[-10.4110028,9.6916916],[-10.410704,9.6917374],[-10.4105443,9.6917018],[-10.4104567,9.6915596],[-10.4103794,9.691326],[-10.4103072,9.6909298],[-10.4102248,9.6904066],[-10.4102145,9.6900359],[-10.4106937,9.6896295],[-10.410771,9.6894873],[-10.4107967,9.6893248],[-10.4107297,9.6891216],[-10.4106525,9.6889794],[-10.4102402,9.6888169],[-10.4100187,9.6888372],[-10.4097662,9.6888321],[-10.4095653,9.6887255],[-10.409421,9.6885985],[-10.4092973,9.6883395],[-10.4092458,9.6880957],[-10.4092303,9.6878468],[-10.4092819,9.6876944],[-10.4093798,9.6875979],[-10.4096271,9.6875928],[-10.4097456,9.6876589],[-10.4098899,9.6877858],[-10.409962,9.687862],[-10.4100805,9.6879026],[-10.4102351,9.6878468],[-10.4104464,9.6877909],[-10.4106267,9.6876233],[-10.410704,9.6873998],[-10.4106885,9.6871814],[-10.4106164,9.6869884],[-10.4105546,9.6868259],[-10.4105494,9.6867243],[-10.4106473,9.6865872],[-10.4108483,9.6865059],[-10.4111007,9.6864805],[-10.4113068,9.6865465],[-10.4114975,9.6866837],[-10.4117139,9.6868056],[-10.4118994,9.6868411],[-10.413033,9.6864297],[-10.413306,9.6862926],[-10.4133988,9.6861148],[-10.4134812,9.6858405],[-10.4134555,9.6855307],[-10.4133833,9.6850533],[-10.4127908,9.6836971],[-10.4123219,9.6823461],[-10.4106525,9.6829505],[-10.4100393,9.6829962],[-10.408983,9.6828133],[-10.4082617,9.6828083],[-10.4079399,9.6828085],[-10.4076176,9.6828083],[-10.4072672,9.6826457],[-10.4067107,9.6824984],[-10.405639,9.682666],[-10.4052989,9.6826914],[-10.4050877,9.6825645],[-10.4046188,9.6819854],[-10.4043921,9.6819397],[-10.4029957,9.681442],[-10.4023774,9.6810661],[-10.4021919,9.6806953],[-10.4021043,9.6803956],[-10.4020631,9.6798572],[-10.4021146,9.6795728],[-10.4033564,9.6790649],[-10.4034646,9.6787754],[-10.40348,9.6785468],[-10.4037016,9.678242],[-10.4039438,9.678237],[-10.4041035,9.6783893],[-10.4043251,9.678435],[-10.4045827,9.6784198],[-10.4047373,9.6783284],[-10.4048712,9.6781963],[-10.4049434,9.6780795],[-10.4050825,9.6775259],[-10.405402,9.6769925],[-10.4059997,9.676449],[-10.4064582,9.6762916],[-10.4067468,9.676124],[-10.4068808,9.6759665],[-10.4069065,9.6757989],[-10.4069065,9.6755906],[-10.4069735,9.6748491],[-10.4068705,9.6745138],[-10.4067056,9.6744732],[-10.4066025,9.6745595],[-10.4065407,9.6747576],[-10.4064582,9.6748288],[-10.4062728,9.6747932],[-10.4061182,9.6746967],[-10.4059894,9.6745595],[-10.4058502,9.6744072],[-10.4058245,9.674077],[-10.4058708,9.6739196],[-10.4059894,9.6737519],[-10.4061439,9.6736097],[-10.40635,9.6734827],[-10.4065098,9.6733151],[-10.4065201,9.6731627],[-10.4065149,9.6729291],[-10.4064273,9.6727158],[-10.4061336,9.6722789],[-10.4053556,9.6716085],[-10.404423,9.6707094],[-10.4032739,9.6698713],[-10.4031091,9.6687437],[-10.4029236,9.6684745],[-10.4026814,9.6682662],[-10.4025062,9.668063],[-10.4024598,9.6679157],[-10.402501,9.6676872],[-10.4024598,9.6673976],[-10.4027329,9.6671437],[-10.4034182,9.6667018],[-10.4044642,9.6663411],[-10.4054483,9.6659906],[-10.4061903,9.6655182],[-10.4063652,9.6643236],[-10.4064599,9.6641584],[-10.4067004,9.6641009],[-10.406919,9.6643164],[-10.4072542,9.6643811],[-10.407655,9.6643308],[-10.4078873,9.6642242],[-10.4081371,9.6638433],[-10.4084365,9.6635873],[-10.4085311,9.6632125],[-10.4083721,9.6629274],[-10.4080568,9.6628995],[-10.4079299,9.6632233],[-10.4074161,9.6635343],[-10.4071252,9.6634752],[-10.4069714,9.6632442],[-10.4068846,9.6625679],[-10.4063641,9.6622372],[-10.4059105,9.6624453],[-10.4054272,9.6622788],[-10.4053974,9.6620226],[-10.4056745,9.6616251],[-10.4057175,9.6613981],[-10.4054801,9.6611529],[-10.4045815,9.6610692],[-10.4042453,9.660902],[-10.4040018,9.6602821],[-10.4040099,9.6599085],[-10.4041742,9.6595183],[-10.4045891,9.6594833],[-10.4049684,9.6592439],[-10.4051127,9.6589182],[-10.4049445,9.6585999],[-10.4042843,9.6584068],[-10.4037227,9.6579122],[-10.4035858,9.6576279],[-10.4036057,9.6573737],[-10.4038448,9.6573278],[-10.4042715,9.6574396],[-10.4045924,9.6571886],[-10.4049181,9.6564878],[-10.4052999,9.6561866],[-10.4055243,9.6558703],[-10.4054516,9.6554679],[-10.4048898,9.6550653],[-10.4045513,9.6545838],[-10.4043436,9.6540363],[-10.4042743,9.6535165],[-10.4046353,9.6533639],[-10.4049747,9.653011],[-10.4053259,9.6519008],[-10.4055927,9.6508947],[-10.40555,9.6503785],[-10.4051962,9.6500393],[-10.4050808,9.6496169],[-10.404806,9.6495156],[-10.4043384,9.6497376],[-10.4040821,9.6496453],[-10.4037946,9.6492956],[-10.4039272,9.6491335],[-10.4042547,9.6490183],[-10.4044684,9.6486616],[-10.4044025,9.6480781],[-10.404623,9.6477523],[-10.4051788,9.6478544],[-10.4055642,9.6475609],[-10.40575,9.6471462],[-10.4058717,9.6464719],[-10.4059633,9.6461802],[-10.4058093,9.6456784],[-10.4055864,9.6455591],[-10.4046075,9.6457922],[-10.4042909,9.6456892],[-10.4041396,9.6452415],[-10.4038896,9.6451114],[-10.4034304,9.6450917],[-10.4031356,9.644885],[-10.4029612,9.644615],[-10.4030367,9.644196],[-10.4032927,9.6440028],[-10.4040328,9.6437658],[-10.4047368,9.6437578],[-10.4049361,9.6438041],[-10.4051821,9.643664],[-10.4053742,9.6434236],[-10.4053927,9.6429828],[-10.4052873,9.6426676],[-10.4050839,9.642482],[-10.4047745,9.6423264],[-10.4041297,9.6424274],[-10.4035909,9.6421202],[-10.4034977,9.6417597],[-10.4037987,9.6405156],[-10.4039312,9.6396637],[-10.4041451,9.6394984],[-10.4045194,9.6396417],[-10.4048116,9.639933],[-10.4051519,9.6399939],[-10.4056992,9.6399293],[-10.4059906,9.6396899],[-10.4063519,9.6387877],[-10.4064305,9.6383405],[-10.406376,9.6379092],[-10.4062947,9.6373735],[-10.4052904,9.6362761],[-10.404359,9.6354453],[-10.4039729,9.6349609],[-10.4030414,9.6341852],[-10.4029567,9.634012],[-10.4030134,9.6338187],[-10.4032812,9.6335708],[-10.4036219,9.6327329],[-10.4037439,9.632234],[-10.4036295,9.6317274],[-10.4033173,9.631371],[-10.4033175,9.6311924],[-10.4036423,9.6308866],[-10.4035628,9.6302159],[-10.4036344,9.6298617],[-10.4037721,9.6296909],[-10.4040733,9.6295678],[-10.4043894,9.6296193],[-10.4045729,9.6297831],[-10.40448,9.6300909],[-10.4043636,9.6302636],[-10.4045154,9.6307329],[-10.4046737,9.6309824],[-10.4050618,9.6311624],[-10.405431,9.6311116],[-10.4056792,9.6309169],[-10.4056955,9.630435],[-10.4056145,9.629827],[-10.4058731,9.6295229],[-10.4066327,9.6293364],[-10.4069552,9.6291772],[-10.4070391,9.6289145],[-10.4070369,9.628569],[-10.4069387,9.6284476],[-10.4068004,9.6282769],[-10.4063511,9.6280556],[-10.4061742,9.6281364],[-10.4059552,9.6284435],[-10.4056707,9.6284559],[-10.405468,9.6281827],[-10.4054525,9.627974],[-10.4051329,9.6278351],[-10.404658,9.6280199],[-10.4039158,9.6280226],[-10.403578,9.6278952],[-10.4033456,9.6276526],[-10.4034171,9.627387],[-10.4037616,9.6270753],[-10.4038862,9.6268316],[-10.4037893,9.6264932],[-10.403527,9.6261831],[-10.403674,9.6258877],[-10.4041374,9.6259785],[-10.4044662,9.6259204],[-10.4046688,9.6257344],[-10.4052507,9.6257763],[-10.4054063,9.6256928],[-10.4051249,9.6251402],[-10.4049137,9.6249517],[-10.4049157,9.6246956],[-10.4055355,9.6242292],[-10.4056289,9.6238391],[-10.4054433,9.6236472],[-10.405,9.6235024],[-10.4049609,9.6231674],[-10.4056321,9.6230125],[-10.4060441,9.6226212],[-10.4063329,9.622049],[-10.40663,9.621879],[-10.4074566,9.6218254],[-10.4077298,9.6214785],[-10.4079364,9.6215027],[-10.4083118,9.6217843],[-10.4087777,9.6217629],[-10.4091507,9.6216674],[-10.4094518,9.6217766],[-10.4097265,9.6215927],[-10.4097556,9.6213909],[-10.4095747,9.6212864],[-10.4091972,9.6212891],[-10.4089543,9.6211713],[-10.4086133,9.620651],[-10.4084697,9.620203],[-10.4084396,9.6198209],[-10.4085587,9.6195472],[-10.4087682,9.6194087],[-10.4095755,9.6190212],[-10.410148,9.6187834],[-10.411179,9.6179988],[-10.4116587,9.6182449],[-10.4121572,9.6182155],[-10.4130034,9.6176154],[-10.4138008,9.6173371],[-10.4141846,9.616718],[-10.4145356,9.6164085],[-10.4144418,9.6157468],[-10.4146175,9.6155357],[-10.4148323,9.6156506],[-10.4159287,9.6167071],[-10.4162375,9.6167375],[-10.4163873,9.6165346],[-10.4162986,9.6160562],[-10.416442,9.6155796],[-10.41673,9.6153735],[-10.4175596,9.6151095],[-10.4178914,9.6145719],[-10.4177575,9.6142604],[-10.4174973,9.6143593],[-10.4170857,9.6146939],[-10.4167213,9.6146335],[-10.4164081,9.6144324],[-10.4161948,9.6141427],[-10.4161075,9.6139254],[-10.4162362,9.6136357],[-10.4164874,9.613523],[-10.416855,9.6137081],[-10.4171554,9.6135713],[-10.41757,9.6131931],[-10.4178829,9.6127314],[-10.4179046,9.6125005],[-10.4175686,9.6118902],[-10.4167558,9.61142],[-10.4165742,9.6112556],[-10.4095885,9.6110016],[-10.4071535,9.6109051],[-10.3968915,9.6105399],[-10.3952151,9.6104789],[-10.3920018,9.6103622],[-10.38546,9.6095813],[-10.3763099,9.6084891],[-10.3313166,9.6031187],[-10.3076116,9.5997326],[-10.2753231,9.5951205],[-10.2448739,9.6059479],[-10.2068534,9.663235],[-10.1724375,9.7034101],[-10.1466533,9.7121389],[-10.0907663,9.7182005],[-10.0179823,9.7127313],[-9.9914539,9.7025982],[-9.955946,9.6690966],[-9.9289225,9.6724057],[-9.8595379,9.599424],[-9.8114632,9.5696134],[-9.7519893,9.5823199],[-9.7083752,9.5627713],[-9.6751689,9.5764554],[-9.6315548,9.575478],[-9.5904187,9.609686],[-9.5864538,9.5705909],[-9.5458133,9.5647262],[-9.529458,9.5412666],[-9.5354054,9.5119397],[-9.5839757,9.4850546],[-9.6556507,9.4757911],[-9.6558399,9.4757665],[-9.6806207,9.4425229],[-9.6811163,9.37896],[-9.6925155,9.3584219],[-9.7113489,9.3075602],[-9.7108532,9.2909307],[-9.6607961,9.2439726],[-9.5973573,9.2405484],[-9.5542388,9.2327213],[-9.5349097,9.2126638],[-9.5557256,9.1813522],[-9.5924011,9.1402515],[-9.5904187,9.103061],[-9.5880537,9.0991481],[-9.5720809,9.0727186],[-9.5354054,9.0575464],[-9.5051728,9.009089],[-9.467506,8.9811864],[-9.400598,8.9704164],[-9.3336899,8.924885],[-9.2885889,8.9062792],[-9.2117685,8.8543737],[-9.158242,8.841641],[-9.0715093,8.8617192],[-9.0288863,8.8734718],[-8.9793248,8.8666162],[-8.9580133,8.9165615],[-8.9347194,8.9395732],[-8.8990351,8.9591564],[-8.8829569,8.9599924],[-8.8613683,8.9611147],[-8.8495382,8.9542408],[-8.819241,8.9366356],[-8.7929734,8.9498545],[-8.7243827,9.0183043],[-8.7228142,9.0129009],[-8.7018202,8.9837508],[-8.7002989,8.9597077],[-8.7059928,8.9540833],[-8.7219014,8.9383682],[-8.7961411,8.9137209],[-8.8174394,8.8863666],[-8.8353908,8.8511937],[-8.8855938,8.8112067],[-8.9224094,8.788355],[-8.9528355,8.7715161],[-8.955052,8.7572917],[-8.9520093,8.7368423],[-8.944707,8.7320306],[-8.9416643,8.7248128],[-8.9413601,8.7163918],[-8.9316236,8.7175948],[-8.9322321,8.6977448],[-8.9308898,8.6974131],[-8.9176274,8.6941356],[-8.9227999,8.6866163],[-8.9173231,8.6793976],[-8.9188444,8.6640575],[-8.9209743,8.6592447],[-8.9200615,8.6544319],[-8.9953004,8.6215567],[-9.0318155,8.6055706],[-9.0791033,8.5848675],[-9.1337211,8.5724995],[-9.2208594,8.5720872],[-9.2842328,8.58899],[-9.3567785,8.6343353],[-9.3817943,8.6537084],[-9.4439169,8.6306254],[-9.4814406,8.6384573],[-9.4972222,8.6492122],[-9.5243843,8.6677223],[-9.5760836,8.6912152],[-9.5884967,8.6895419],[-9.6127735,8.6862694],[-9.6159527,8.6929476],[-9.6175752,8.6963561],[-9.6194443,8.7002822],[-9.6307014,8.7229488],[-9.6398739,8.7464382],[-9.6529768,8.776555],[-9.6578019,8.787644],[-9.6619712,8.8350251],[-9.6744791,8.8461485],[-9.6994949,8.8473844],[-9.7349339,8.8354371],[-9.7735615,8.8249778],[-9.8121573,8.8265167],[-9.8595547,8.8156605],[-9.8829952,8.8051705],[-9.9454666,8.8093709],[-9.996238,8.8024239],[-10.0165465,8.8340704],[-10.0142032,8.8811491],[-10.0470093,8.9004419],[-10.0915319,8.8742034],[-10.1173081,8.8742034],[-10.1423032,8.9089304],[-10.180577,8.9104737],[-10.2071343,8.8865511],[-10.2305672,8.9151037],[-10.2495801,8.9343681],[-10.2523371,8.9371614],[-10.26103,8.9459689],[-10.2883684,8.9490552],[-10.3102391,8.980689],[-10.3071147,9.0362342],[-10.3282044,9.0601469],[-10.3610105,9.0632323],[-10.3828812,9.0400912],[-10.4039708,9.0015194],[-10.4484934,8.9860896],[-10.4891105,8.9837751],[-10.4933454,8.9994607],[-10.4953592,9.0069197],[-10.4602099,9.0362342],[-10.4625531,9.067089],[-10.4836428,9.0848294],[-10.5133245,9.062461],[-10.5359763,9.0632323],[-10.5732577,9.0494962],[-10.5735145,9.0494016],[-10.5734701,9.049529],[-10.5735071,9.049869],[-10.5736851,9.050114],[-10.5739001,9.050854],[-10.5738731,9.05122],[-10.5744131,9.051475],[-10.5747471,9.051845],[-10.5752131,9.052251],[-10.5758761,9.052646],[-10.5766241,9.052825],[-10.5776181,9.052825],[-10.5780901,9.05276],[-10.5786631,9.052872],[-10.5789381,9.0528],[-10.5791401,9.052609],[-10.5795221,9.052548],[-10.5799771,9.052548],[-10.5803851,9.052662],[-10.5809871,9.052385],[-10.5814261,9.052402],[-10.5818981,9.052646],[-10.5824031,9.05232],[-10.5831841,9.051897],[-10.5832981,9.051734],[-10.5835591,9.051767],[-10.5838191,9.052027],[-10.5839981,9.051978],[-10.5841431,9.051487],[-10.5844051,9.05157],[-10.5845131,9.051511],[-10.5846081,9.051296],[-10.5846681,9.051296],[-10.5848591,9.051463],[-10.5850141,9.051916],[-10.5852051,9.052084],[-10.5852651,9.052358],[-10.5855041,9.052609],[-10.5855271,9.052919],[-10.5858861,9.05317],[-10.5859331,9.053266],[-10.5858981,9.053373],[-10.5856951,9.053576],[-10.5856831,9.053779],[-10.5857901,9.05403],[-10.5859031,9.054615],[-10.5867211,9.054937],[-10.5868411,9.055594],[-10.5869481,9.055737],[-10.5869241,9.055928],[-10.5868411,9.056035],[-10.5868411,9.056143],[-10.5870431,9.056274],[-10.5874331,9.05639],[-10.5876941,9.056324],[-10.5879051,9.056438],[-10.5882471,9.056357],[-10.5883456,9.0564473],[-10.5884041,9.056501],[-10.5885121,9.056823],[-10.5887871,9.05711],[-10.5889301,9.057157],[-10.5890971,9.057122],[-10.5892401,9.057014],[-10.5894431,9.05699],[-10.5895391,9.057086],[-10.5895391,9.057181],[-10.5893121,9.057301],[-10.5892281,9.057408],[-10.5893241,9.057504],[-10.5895151,9.057527],[-10.5895741,9.057623],[-10.5895621,9.057718],[-10.589264,9.058017],[-10.5892881,9.05822],[-10.5895621,9.058184],[-10.5895741,9.058387],[-10.5894311,9.05853],[-10.5894311,9.058793],[-10.5892521,9.058972],[-10.5895271,9.059306],[-10.5895314,9.0593512],[-10.5895511,9.059557],[-10.5897891,9.059808],[-10.5897061,9.059963],[-10.5897541,9.060142],[-10.5903751,9.060488],[-10.5908521,9.0610525],[-10.5910432,9.0612052],[-10.5911244,9.0610912],[-10.5911957,9.060938],[-10.591299,9.0608926],[-10.5913884,9.061071],[-10.5915047,9.0611371],[-10.5916768,9.0611388],[-10.591717,9.0609813],[-10.5918067,9.0609301],[-10.591902,9.0608665],[-10.5919584,9.060983],[-10.5921633,9.061228],[-10.5923451,9.0615337],[-10.5926191,9.061503],[-10.5928341,9.0615269],[-10.5929949,9.0616825],[-10.5931773,9.0616432],[-10.593451,9.0616518],[-10.593713,9.0615551],[-10.5937914,9.0613192],[-10.5938981,9.0613633],[-10.5940467,9.0613731],[-10.5942421,9.06136],[-10.5942782,9.0614734],[-10.5945753,9.0616084],[-10.5946875,9.0614104],[-10.5949231,9.061467],[-10.5947752,9.0615559],[-10.5948055,9.0618124],[-10.595066,9.0616046],[-10.5951694,9.0616266],[-10.5952993,9.0617837],[-10.5955966,9.0618204],[-10.5959046,9.0620389],[-10.5962561,9.0622284],[-10.5963147,9.0625084],[-10.5963554,9.0623619],[-10.5966661,9.0625419],[-10.5970264,9.0626955],[-10.5969244,9.0628177],[-10.5967377,9.0626401],[-10.5966719,9.0629106],[-10.5965675,9.0630439],[-10.5963758,9.0631265],[-10.5966555,9.0632102],[-10.5967099,9.0633417],[-10.5968771,9.0634041],[-10.5969858,9.0632441],[-10.5971742,9.0633813],[-10.597132,9.0635875],[-10.5972193,9.0636635],[-10.5973005,9.0633837],[-10.5974621,9.0633795],[-10.5975893,9.0636019],[-10.5976314,9.0637609],[-10.5977919,9.0637662],[-10.5980331,9.0633556],[-10.5983844,9.0634364],[-10.5985693,9.0633213],[-10.5987968,9.0634379],[-10.598906,9.0636077],[-10.5989644,9.0638301],[-10.5990811,9.0635972],[-10.5992665,9.0636765],[-10.5994135,9.0641768],[-10.5994854,9.0642104],[-10.5995199,9.0641587],[-10.5996118,9.0639331],[-10.5997338,9.0640403],[-10.5997923,9.0640772],[-10.6000642,9.0640496],[-10.6002033,9.0639433],[-10.6005341,9.064057],[-10.6005805,9.0642874],[-10.6008201,9.064285],[-10.6008681,9.0644639],[-10.6010471,9.0645589],[-10.6011877,9.0648665],[-10.6015386,9.06483],[-10.6016249,9.0650464],[-10.6017799,9.06536],[-10.6020706,9.0655708],[-10.6022291,9.0650249],[-10.6023481,9.0650609],[-10.6024801,9.0651679],[-10.6028261,9.0653533],[-10.6029451,9.0653381],[-10.6032178,9.0654808],[-10.6033568,9.0653382],[-10.6035967,9.0654603],[-10.6037433,9.0653647],[-10.6038921,9.0653278],[-10.6041308,9.0659227],[-10.6040737,9.0661162],[-10.6042649,9.0663208],[-10.6044989,9.0663719],[-10.6046237,9.0663256],[-10.6046264,9.0661907],[-10.6047875,9.0662266],[-10.6049631,9.0664569],[-10.6050581,9.0666129],[-10.6051901,9.0666009],[-10.6052501,9.0664929],[-10.6054164,9.0667299],[-10.6054642,9.0663282],[-10.6058088,9.0664976],[-10.6057028,9.0668239],[-10.6058704,9.0670602],[-10.605948,9.0668971],[-10.6062213,9.0669311],[-10.6064509,9.06719],[-10.606601,9.0671198],[-10.6068478,9.0674948],[-10.6070786,9.0676579],[-10.6074921,9.0675459],[-10.6077301,9.0675909],[-10.6078551,9.0679309],[-10.6081611,9.068158],[-10.6086641,9.0683559],[-10.6088311,9.0683559],[-10.6088981,9.068044],[-10.6093621,9.067897],[-10.6095431,9.0677949],[-10.6102963,9.0680284],[-10.6104072,9.0679859],[-10.6106969,9.0681071],[-10.6108011,9.068308],[-10.6108388,9.0685056],[-10.6108906,9.0686352],[-10.6111103,9.0688633],[-10.6109681,9.0688809],[-10.61074,9.0690702],[-10.6108927,9.0693671],[-10.6110219,9.0691298],[-10.6111503,9.069128],[-10.6111577,9.0694882],[-10.6114061,9.0694039],[-10.6116376,9.0695683],[-10.6118016,9.0694651],[-10.6118851,9.0692877],[-10.6121096,9.069393],[-10.612383,9.069429],[-10.6125617,9.0693448],[-10.6127941,9.0689639],[-10.6128661,9.0690839],[-10.6130811,9.0691669],[-10.6133551,9.0691439],[-10.6133804,9.0692983],[-10.6133866,9.0696012],[-10.6134664,9.0696449],[-10.613686,9.0696328],[-10.613764,9.0696844],[-10.6137371,9.0698839],[-10.6136943,9.0700388],[-10.6136819,9.0702454],[-10.6138612,9.0702142],[-10.6140721,9.0703139],[-10.6143071,9.0705003],[-10.61452,9.0705406],[-10.6144665,9.070779],[-10.6145089,9.0709663],[-10.6145832,9.0712007],[-10.6149433,9.0712168],[-10.6151501,9.0714471],[-10.615387,9.0715228],[-10.61559,9.0717573],[-10.6157853,9.071706],[-10.6157084,9.0715509],[-10.6159352,9.0715069],[-10.6160378,9.0715905],[-10.6162065,9.0717252],[-10.6165326,9.0717261],[-10.6164942,9.0719128],[-10.6166112,9.0721752],[-10.6167032,9.0721442],[-10.6168241,9.0719887],[-10.6169611,9.072044],[-10.6171521,9.0722709],[-10.6173911,9.0724259],[-10.6175461,9.0724379],[-10.6188471,9.0731909],[-10.6190029,9.0732343],[-10.6194615,9.0735769],[-10.6198757,9.0738273],[-10.6199983,9.0738067],[-10.6201545,9.0736341],[-10.6203952,9.0735847],[-10.6208039,9.0736314],[-10.620856,9.0733682],[-10.6209644,9.0731845],[-10.6211131,9.0731936],[-10.6212538,9.0732743],[-10.6214929,9.0730075],[-10.6218529,9.0728918],[-10.6219674,9.0726254],[-10.6221061,9.0727129],[-10.6226155,9.0724166],[-10.6232297,9.072327],[-10.6234203,9.0721486],[-10.6236351,9.072068],[-10.6246731,9.0715189],[-10.6248401,9.0716149],[-10.6251621,9.0717099],[-10.6256281,9.0717099],[-10.6259151,9.0718889],[-10.6263091,9.0722709],[-10.6264881,9.0725699],[-10.6265951,9.0728679],[-10.6264641,9.0735129],[-10.6265241,9.0737159],[-10.6268821,9.0742769],[-10.6271451,9.0743489],[-10.6275781,9.0743359],[-10.6279291,9.0737679],[-10.6289721,9.0735979],[-10.6292441,9.0738249],[-10.6294731,9.0743249],[-10.6296631,9.0745039],[-10.6299621,9.0746229],[-10.6304041,9.0747069],[-10.6308201,9.0749019],[-10.6313641,9.0750609],[-10.6317941,9.0751629],[-10.6321701,9.0751839],[-10.6323261,9.0753159],[-10.6323621,9.0754949],[-10.6321581,9.0758529],[-10.6321941,9.0760319],[-10.6323041,9.0762279],[-10.6327471,9.0763529],[-10.6328371,9.0761369],[-10.6332571,9.0760079],[-10.6334721,9.0760439],[-10.6336271,9.0757809],[-10.6337701,9.0757569],[-10.6339491,9.0758999],[-10.6341641,9.0757339],[-10.6343191,9.0757449],[-10.6345101,9.0760319],[-10.6348441,9.0760079],[-10.6350951,9.0762939],[-10.6353221,9.0762939],[-10.6355251,9.0763539],[-10.6356451,9.0765099],[-10.6357161,9.0769269],[-10.6358591,9.0770109],[-10.6361221,9.0769749],[-10.6363131,9.0770109],[-10.6364561,9.0771419],[-10.6367311,9.0775239],[-10.6369821,9.0777149],[-10.6374951,9.0779659],[-10.6377701,9.0780849],[-10.6380681,9.0781329],[-10.6385461,9.0780619],[-10.6387121,9.0780849],[-10.6388842,9.0782836],[-10.6389401,9.0783479],[-10.6391431,9.0784789],[-10.6400971,9.0786339],[-10.6407781,9.0789089],[-10.6420081,9.0796139],[-10.6422221,9.0796849],[-10.6429631,9.0795179],[-10.6431421,9.0795769],[-10.6432611,9.0797089],[-10.6437151,9.0800069],[-10.6447061,9.0805209],[-10.6451471,9.0805089],[-10.6456731,9.0805799],[-10.6465801,9.0809499],[-10.6469861,9.0810219],[-10.6475591,9.0809739],[-10.6477021,9.0810219],[-10.6477741,9.0811539],[-10.6478341,9.0814999],[-10.6479531,9.0816669],[-10.6481441,9.0817619],[-10.6483351,9.0817619],[-10.6488761,9.0815779],[-10.6491371,9.0814079],[-10.6496361,9.0813399],[-10.6497151,9.0811249],[-10.6497261,9.0808639],[-10.6498621,9.0807399],[-10.6500781,9.0807059],[-10.6505201,9.0805239],[-10.6506641,9.0805419],[-10.6507351,9.0812839],[-10.6509281,9.0814429],[-10.6511101,9.0814759],[-10.6515521,9.0814079],[-10.6519711,9.0816689],[-10.6524581,9.0818729],[-10.6531611,9.0818959],[-10.6535581,9.0820319],[-10.6539431,9.0822919],[-10.6542601,9.0824399],[-10.6545891,9.0825299],[-10.6548271,9.0827229],[-10.6552411,9.0827319],[-10.6554741,9.0823489],[-10.6557341,9.0824059],[-10.6558141,9.0825189],[-10.6560401,9.0824399],[-10.6566411,9.0824059],[-10.6567091,9.0822239],[-10.6570381,9.0823369],[-10.6582391,9.0824739],[-10.6587491,9.0824169],[-10.6598381,9.0829039],[-10.6602571,9.0828819],[-10.6605181,9.0829499],[-10.6608011,9.0831429],[-10.6610841,9.0831759],[-10.6614021,9.0833689],[-10.6617071,9.0834709],[-10.6621501,9.0834709],[-10.6627621,9.0832219],[-10.6633741,9.0831649],[-10.6640431,9.0833579],[-10.6643601,9.0835619],[-10.6647001,9.0841629],[-10.6656051,9.0849039],[-10.6658871,9.0853429],[-10.6664211,9.0855939],[-10.6670801,9.0856869],[-10.6675501,9.0856869],[-10.6813501,9.0817039],[-10.6963898,9.080163],[-10.7007031,9.0786929],[-10.7055331,9.0795399],[-10.7137821,9.0803869],[-10.7224391,9.0774379],[-10.7240571,9.0784479],[-10.7260771,9.0800729],[-10.7275201,9.0801049],[-10.7289631,9.0803239],[-10.7297781,9.0807319],[-10.7304681,9.0811399],[-10.7307511,9.0817039],[-10.7308131,9.0824569],[-10.7307751,9.0833539],[-10.7308041,9.0842979],[-10.7302241,9.0862529],[-10.7298261,9.0867599],[-10.7284141,9.0879549],[-10.7279791,9.0886069],[-10.7276531,9.0907439],[-10.7272191,9.0922999],[-10.7269291,9.0945819],[-10.7269291,9.0966819],[-10.7272911,9.0989269],[-10.7270741,9.1003399],[-10.7267121,9.1014259],[-10.7262771,9.1040699],[-10.7259511,9.1047569],[-10.7254081,9.1053369],[-10.7254081,9.1056629],[-10.7258071,9.1067489],[-10.7257701,9.1072199],[-10.7223561,9.1114329],[-10.7233461,9.1124219],[-10.7236291,9.1130339],[-10.7237231,9.1142129],[-10.7236761,9.1154619],[-10.7231811,9.1166159],[-10.7222861,9.1179829],[-10.7219091,9.1189249],[-10.7212961,9.1200089],[-10.7200711,9.1217529],[-10.7199301,9.1230249],[-10.7197411,9.1240149],[-10.7196001,9.1251459],[-10.7190811,9.1275019],[-10.7189401,9.1285389],[-10.7187981,9.1288689],[-10.7182331,9.1295289],[-10.7196471,9.1307539],[-10.7205431,9.1314139],[-10.7209661,9.1324039],[-10.7209191,9.1335339],[-10.7205891,9.1346659],[-10.7199771,9.1356549],[-10.7193641,9.1370689],[-10.7171491,9.1365039],[-10.7154061,9.1364089],[-10.7143221,9.1369749],[-10.7138031,9.1374459],[-10.7136621,9.1382939],[-10.7140391,9.1387179],[-10.7148871,9.1394249],[-10.7149811,9.1403209],[-10.7145571,9.1418289],[-10.7138501,9.1430539],[-10.7133791,9.1445619],[-10.7149811,9.1447039],[-10.7161121,9.1455039],[-10.7162928,9.1469351],[-10.7162728,9.1472676],[-10.7163377,9.1475818],[-10.7164891,9.1486619],[-10.7166311,9.1499819],[-10.7160181,9.1509239],[-10.7147461,9.1519139],[-10.7130021,9.1523849],[-10.7117771,9.1526209],[-10.7114001,9.1553539],[-10.7114941,9.1564849],[-10.7111171,9.1571919],[-10.7105521,9.1576629],[-10.7088081,9.1580869],[-10.7077241,9.1580399],[-10.7082891,9.1590769],[-10.7093261,9.1599719],[-10.7094681,9.1608679],[-10.7093261,9.1622339],[-10.7088081,9.1627529],[-10.7079601,9.1633179],[-10.7092791,9.1637419],[-10.7102221,9.1641659],[-10.7106451,9.1646849],[-10.7109281,9.1657219],[-10.7115411,9.1662869],[-10.7122481,9.1663819],[-10.7132371,9.1663819],[-10.7144161,9.1665699],[-10.7149811,9.1669469],[-10.7158301,9.1686909],[-10.7158771,9.1695389],[-10.7154531,9.1706229],[-10.7155001,9.1724139],[-10.7154061,9.1734029],[-10.7149341,9.1741099],[-10.7141331,9.1754769],[-10.7153111,9.1764659],[-10.7161121,9.1767019],[-10.7170551,9.1767019],[-10.7177621,9.1762309],[-10.7184221,9.1756179],[-10.7192701,9.1753829],[-10.7200241,9.1756659],[-10.7206841,9.1763249],[-10.7211071,9.1776919],[-10.7231341,9.1787759],[-10.7226631,9.1803309],[-10.7223331,9.1820739],[-10.7221441,9.1825929],[-10.7218151,9.1845249],[-10.7217201,9.1858919],[-10.7218621,9.1871169],[-10.7214851,9.1879649],[-10.7206371,9.1888609],[-10.7202601,9.1897089],[-10.7195051,9.1909339],[-10.7187521,9.1913579],[-10.7174791,9.191547],[-10.7166311,9.1914999],[-10.7159241,9.193762],[-10.7158301,9.195128],[-10.7154061,9.196731],[-10.7150281,9.197768],[-10.7152641,9.198522],[-10.7153581,9.199228],[-10.7149341,9.200171],[-10.7138971,9.2012549],[-10.7131431,9.199558],[-10.7119651,9.197391],[-10.7099391,9.197344],[-10.7090901,9.196872],[-10.7079121,9.195883],[-10.7073941,9.194799],[-10.7070641,9.193291],[-10.7068281,9.192631],[-10.7067341,9.191736],[-10.7066871,9.1901329],[-10.7059331,9.1893319],[-10.7059331,9.1887659],[-10.7061691,9.1876829],[-10.7062161,9.1865039],[-10.7057921,9.1859859],[-10.7046611,9.1856089],[-10.7026341,9.1857029],[-10.7015031,9.1861269],[-10.6999951,9.1886719],[-10.6995711,9.1897089],[-10.6990531,9.1911699],[-10.6986751,9.191688],[-10.6980161,9.191924],[-10.6968851,9.191547],[-10.6962251,9.191594],[-10.6953301,9.191971],[-10.6938221,9.193291],[-10.6916071,9.193432],[-10.6902871,9.193432],[-10.6892031,9.193762],[-10.6882141,9.193432],[-10.6869881,9.192207],[-10.6866581,9.1914529],[-10.6858571,9.1911229],[-10.6847271,9.1912639],[-10.6838781,9.19216],[-10.6830771,9.193244],[-10.6824641,9.194846],[-10.6818991,9.195741],[-10.6812861,9.196401],[-10.6802021,9.196495],[-10.6790711,9.197155],[-10.6777521,9.19772],[-10.6766681,9.197768],[-10.6752071,9.197768],[-10.6740761,9.197485],[-10.6720021,9.198097],[-10.6702581,9.198757],[-10.6671951,9.1997],[-10.6656401,9.201114],[-10.6636141,9.2032819],[-10.6638961,9.204931],[-10.6640371,9.206392],[-10.6636141,9.207334],[-10.6618701,9.209879],[-10.6605031,9.210539],[-10.6586651,9.21068],[-10.6568741,9.211152],[-10.6564031,9.212424],[-10.6560261,9.213131],[-10.6557441,9.215628],[-10.6560731,9.21709],[-10.6566391,9.218833],[-10.6570161,9.2197759],[-10.6576281,9.2210009],[-10.6578171,9.2222729],[-10.6572991,9.2228859],[-10.6560261,9.2242059],[-10.6556971,9.2252899],[-10.6557911,9.2263729],[-10.6563561,9.2279759],[-10.6569691,9.2292949],[-10.6582411,9.2311799],[-10.6596551,9.2315569],[-10.6615871,9.2316989],[-10.6654991,9.2314159],[-10.6667241,9.2316989],[-10.6672421,9.2323109],[-10.6676671,9.2351389],[-10.6679961,9.2361759],[-10.6687981,9.2372599],[-10.6696461,9.2378249],[-10.6704471,9.2381079],[-10.6694101,9.2408409],[-10.6695521,9.2421139],[-10.6701641,9.2433859],[-10.6707301,9.2449409],[-10.6704941,9.2472499],[-10.6705411,9.2488059],[-10.6700231,9.2499839],[-10.6702111,9.2509729],[-10.6697871,9.2517739],[-10.6686091,9.2528579],[-10.6685621,9.2537059],[-10.6692221,9.2546019],[-10.6676671,9.2587489],[-10.6673371,9.2601629],[-10.6680911,9.2612469],[-10.6684681,9.2620949],[-10.6669131,9.2648279],[-10.6691751,9.2661009],[-10.6679961,9.2693059],[-10.6668181,9.2732639],[-10.6655461,9.2733579],[-10.6640851,9.2740179],[-10.6626241,9.2748659],[-10.6616341,9.2766569],[-10.6600791,9.2800029],[-10.6609741,9.2807569],[-10.6611161,9.2820769],[-10.6608801,9.2857999],[-10.6602201,9.2866009],[-10.6566861,9.2872599],[-10.6540471,9.2885329],[-10.6538581,9.2896169],[-10.6545181,9.2908419],[-10.6567331,9.2919259],[-10.6587601,9.2925389],[-10.6600791,9.2932459],[-10.6608331,9.2939049],[-10.6618701,9.2950839],[-10.6602201,9.2967799],[-10.6598441,9.2975339],[-10.6603621,9.2986649],[-10.6600321,9.299749],[-10.6591371,9.300739],[-10.6589481,9.301634],[-10.6596081,9.302718],[-10.6606451,9.303236],[-10.6642741,9.304226],[-10.6651691,9.3047439],[-10.6654521,9.3053099],[-10.6655461,9.3063469],[-10.6653101,9.3076189],[-10.6645561,9.3084199],[-10.6634251,9.3106829],[-10.6642261,9.3118599],[-10.6654991,9.3123789],[-10.6666301,9.3128969],[-10.6677141,9.3128029],[-10.6687981,9.313746],[-10.6697401,9.31417],[-10.6718141,9.314453],[-10.6733691,9.314358],[-10.6742641,9.31417],[-10.6758661,9.314688],[-10.6767151,9.31563],[-10.6780351,9.3165259],[-10.6797311,9.3170919],[-10.6813331,9.3177509],[-10.6820401,9.3184109],[-10.6821821,9.3201549],[-10.6829361,9.320814],[-10.6835481,9.3217099],[-10.6836431,9.323076],[-10.6835011,9.324113],[-10.6859991,9.324632],[-10.6887791,9.324679],[-10.6904281,9.325621],[-10.6925021,9.32614],[-10.6933501,9.326423],[-10.6951881,9.328119],[-10.6967901,9.329014],[-10.6980631,9.329297],[-10.6989581,9.329156],[-10.7015031,9.328072],[-10.7027761,9.327318],[-10.7035771,9.327271],[-10.7040951,9.327742],[-10.7051321,9.328307],[-10.7058391,9.329392],[-10.7063571,9.330617],[-10.7086191,9.332219],[-10.7077241,9.335188],[-10.7051791,9.337309],[-10.7033411,9.339759],[-10.7029171,9.341597],[-10.7042361,9.344519],[-10.7055091,9.345509],[-10.7078651,9.346593],[-10.7097031,9.348101],[-10.7104571,9.348949],[-10.7117771,9.349137],[-10.7141331,9.347959],[-10.7155001,9.347488],[-10.7165841,9.348336],[-10.7174321,9.34975],[-10.7182331,9.350504],[-10.7192701,9.351305],[-10.7193641,9.352672],[-10.7192231,9.354227],[-10.7188461,9.3557349],[-10.7181861,9.3571019],[-10.7183271,9.3609189],[-10.7171021,9.3615319],[-10.7167251,9.3620969],[-10.7168661,9.3629919],[-10.7179971,9.3638879],[-10.7190811,9.3649249],[-10.7193641,9.3661969],[-10.7198821,9.3671399],[-10.7215321,9.3695429],[-10.7230871,9.3705799],[-10.7247361,9.3732659],[-10.7255851,9.3753399],[-10.7264801,9.3764239],[-10.7272811,9.3771769],[-10.7278941,9.3772249],[-10.7290721,9.3770829],[-10.7296851,9.3775079],[-10.7301561,9.3784029],[-10.7310051,9.3792509],[-10.7315231,9.3795809],[-10.7327011,9.3795809],[-10.7343031,9.3793919],[-10.7357171,9.3786859],[-10.7363301,9.3777429],[-10.7371781,9.3761879],[-10.7376021,9.3758109],[-10.7383561,9.3757639],[-10.7408531,9.3761879],[-10.7412781,9.3768469],[-10.7412781,9.3778369],[-10.7416081,9.3816069],[-10.7420321,9.3822669],[-10.7427861,9.3830209],[-10.7436811,9.3836809],[-10.7447651,9.3840109],[-10.7462261,9.3835399],[-10.7477341,9.3833979],[-10.7501851,9.3838219],[-10.7533001,9.3847329],[-10.7554271,9.3850249],[-10.7566781,9.3851499],[-10.7579291,9.3857339],[-10.7613501,9.3855669],[-10.7618081,9.3848579],[-10.7627671,9.3825639],[-10.7630181,9.3815629],[-10.7628931,9.3805209],[-10.7625591,9.3798119],[-10.7635601,9.3793109],[-10.7648951,9.3788519],[-10.7661051,9.3787689],[-10.7678561,9.3793529],[-10.7686491,9.3791859],[-10.7695661,9.3781849],[-10.7706091,9.3783939],[-10.7714021,9.3787269],[-10.7719021,9.3793529],[-10.7735291,9.3806039],[-10.7733621,9.3812709],[-10.7735701,9.3818139],[-10.7741961,9.3821059],[-10.7749881,9.3821469],[-10.7757811,9.3819799],[-10.7762821,9.3831899],[-10.7770321,9.3842739],[-10.7779501,9.3848999],[-10.7788261,9.3859009],[-10.7794521,9.3862349],[-10.7810361,9.3863179],[-10.7823301,9.3857759],[-10.7829971,9.3857339],[-10.7836641,9.3863179],[-10.7842061,9.3874859],[-10.7851241,9.3883619],[-10.7860421,9.3887379],[-10.7873761,9.3885289],[-10.7888781,9.3878619],[-10.7898371,9.3871939],[-10.7906721,9.3871109],[-10.7915891,9.3872359],[-10.7919231,9.3877359],[-10.7928401,9.3881119],[-10.7953431,9.3886129],[-10.7965111,9.3892799],[-10.7977621,9.3893209],[-10.7989301,9.3884869],[-10.7999311,9.3867349],[-10.8011831,9.3852339],[-10.8024751,9.3843999],[-10.8035181,9.3833569],[-10.8040181,9.3825229],[-10.8042691,9.3815629],[-10.8043521,9.3799779],[-10.8040601,9.3770169],[-10.8040181,9.3745139],[-10.8047281,9.3736799],[-10.8061461,9.3736799],[-10.8069381,9.3746809],[-10.8078981,9.3752649],[-10.8089401,9.3760579],[-10.8097331,9.3769749],[-10.8109011,9.3778099],[-10.8108171,9.3796449],[-10.8116931,9.3823559],[-10.8119021,9.3838159],[-10.8128611,9.3856509],[-10.8146131,9.3857759],[-10.8155721,9.3859839],[-10.8161141,9.3870269],[-10.8159481,9.3876529],[-10.8151551,9.3881119],[-10.8149881,9.3902389],[-10.8144461,9.3909059],[-10.8136121,9.3910729],[-10.8125271,9.3907399],[-10.8101501,9.3901559],[-10.8094411,9.3921159],[-10.8091071,9.3927829],[-10.8084401,9.3937839],[-10.8089821,9.3947849],[-10.8092331,9.3959949],[-10.8082311,9.3963289],[-10.8077311,9.3969539],[-10.8071471,9.3979549],[-10.8061461,9.3986639],[-10.8040601,9.3995399],[-10.8036021,9.4025429],[-10.8061461,9.4042539],[-10.8053531,9.4051289],[-10.8035601,9.4055879],[-10.8028511,9.4060469],[-10.8032681,9.4080069],[-10.8021001,9.4085909],[-10.8017671,9.4091749],[-10.8022251,9.4102179],[-10.8024751,9.4125959],[-10.8041441,9.4152229],[-10.8051031,9.4155149],[-10.8063961,9.4160989],[-10.8068131,9.4170999],[-10.8076891,9.4181839],[-10.8091071,9.4192689],[-10.8104421,9.4201449],[-10.8124021,9.4208119],[-10.8160311,9.4216459],[-10.8163231,9.4237319],[-10.8163651,9.4261089],[-10.8162401,9.4274439],[-10.8166571,9.4287369],[-10.8174071,9.4296959],[-10.8198681,9.4312399],[-10.8211611,9.4301549],[-10.8225801,9.4303639],[-10.8233301,9.4303219],[-10.8243731,9.4299469],[-10.8263751,9.4311139],[-10.8275011,9.4339089],[-10.8290031,9.4347429],[-10.8301291,9.4349519],[-10.8318391,9.4349939],[-10.8330901,9.4355769],[-10.8348421,9.4369539],[-10.8355931,9.4382889],[-10.8365531,9.4394979],[-10.8374701,9.4398319],[-10.8390961,9.4391639],[-10.8400561,9.4389559],[-10.8411401,9.4393729],[-10.8420581,9.4392479],[-10.8425171,9.4397899],[-10.8435601,9.4427519],[-10.8422251,9.4449199],[-10.8416831,9.4465059],[-10.8419751,9.4489249],[-10.8425581,9.4505509],[-10.8436011,9.4513019],[-10.8443521,9.4525119],[-10.8455201,9.4536799],[-10.8468961,9.4547219],[-10.8481471,9.4555559],[-10.8492741,9.4559739],[-10.8501501,9.4560149],[-10.8519851,9.4552639],[-10.8506921,9.4581419],[-10.8492321,9.4595189],[-10.8474381,9.4628139],[-10.8441851,9.4634399],[-10.8396391,9.4640239],[-10.8382211,9.4650249],[-10.8376781,9.4666099],[-10.8378041,9.4688199],[-10.8380121,9.4701969],[-10.8400981,9.4740339],[-10.8404311,9.4760359],[-10.8400981,9.4770789],[-10.8406821,9.4784969],[-10.8408481,9.4800819],[-10.8407651,9.4808739],[-10.8423921,9.4835019],[-10.8408481,9.4861299],[-10.8407231,9.4870889],[-10.8409459,9.4875846],[-10.8410981,9.4879229],[-10.8416831,9.4888409],[-10.8423921,9.4891739],[-10.8433483,9.4892125],[-10.8434341,9.4892159],[-10.8436011,9.4908849],[-10.8438521,9.4913439],[-10.8445601,9.4915939],[-10.8471881,9.4923439],[-10.8475641,9.4933039],[-10.8477301,9.4946379],[-10.8476891,9.4958899],[-10.8474381,9.4969319],[-10.8482731,9.4978079],[-10.8485231,9.4990179],[-10.8479481,9.4996449],[-10.8466931,9.4994359],[-10.8450211,9.4990179],[-10.8415721,9.4986519],[-10.8393251,9.4993319],[-10.8372351,9.4994359],[-10.8379661,9.5000109],[-10.8353011,9.5013169],[-10.8343081,9.5023099],[-10.8342041,9.5038259],[-10.8338381,9.5044529],[-10.8331591,9.5047139],[-10.8318521,9.5045569],[-10.8306501,9.5040349],[-10.8279851,9.5075879],[-10.8223591,9.5134149],[-10.8240311,9.5160899],[-10.8258701,9.5169259],[-10.8280441,9.5176779],[-10.8299191,9.5184059],[-10.8325841,9.5184579],[-10.8334201,9.5186139],[-10.8340471,9.5182489],[-10.8340991,9.5170469],[-10.8351971,9.5165239],[-10.8363461,9.5163679],[-10.8386981,9.5169429],[-10.8414151,9.5182489],[-10.8422131,9.5189137],[-10.8432961,9.5198159],[-10.8449691,9.5212799],[-10.8476861,9.5225339],[-10.8505601,9.5233179],[-10.8520751,9.5238399],[-10.8532771,9.5257219],[-10.8542701,9.5268189],[-10.8554721,9.5273419],[-10.8584511,9.5279679],[-10.8600191,9.5286479],[-10.8609591,9.5297449],[-10.8612731,9.5315219],[-10.8617431,9.5326719],[-10.8630501,9.5341349],[-10.8654011,9.5355459],[-10.8660801,9.5367999],[-10.8670741,9.5394129],[-10.8677001,9.5405099],[-10.8678571,9.5416069],[-10.8649311,9.5427049],[-10.8636241,9.5437499],[-10.8631021,9.5446379],[-10.8631541,9.5461019],[-10.8640951,9.5480349],[-10.8662901,9.5505439],[-10.8667601,9.5519539],[-10.8666031,9.5536269],[-10.8666031,9.5563439],[-10.8661331,9.5582769],[-10.8661331,9.5591659],[-10.8671261,9.5601069],[-10.8686941,9.5614649],[-10.8687981,9.5621969],[-10.8675961,9.5639739],[-10.8687981,9.5656459],[-10.8701571,9.5673699],[-10.8706791,9.5686769],[-10.8709931,9.5700359],[-10.8712021,9.5712369],[-10.8717761,9.5722819],[-10.8727171,9.5734319],[-10.8750691,9.5769329],[-10.8759051,9.5785009],[-10.8768971,9.5792849],[-10.8783091,9.5798079],[-10.8810261,9.5818459],[-10.8830121,9.5820019],[-10.8843701,9.5825249],[-10.8856251,9.5837269],[-10.8863041,9.5851379],[-10.8863561,9.5860779],[-10.8862001,9.5872279],[-10.8858341,9.5885339],[-10.8851541,9.5891619],[-10.8823851,9.5906249],[-10.8810261,9.5915129],[-10.8819141,9.5927149],[-10.8826981,9.5938649],[-10.8839001,9.5950659],[-10.8867741,9.5977319],[-10.8880281,9.5986199],[-10.8899621,9.5995079],[-10.8927321,9.5975749],[-10.8939861,9.5965819],[-10.8952921,9.5964249],[-10.8963371,9.5961119],[-10.8971741,9.5952759],[-10.8980621,9.5940739],[-10.8989501,9.5948579],[-10.9001001,9.5953279],[-10.9011971,9.5954329],[-10.9029221,9.5950139],[-10.9040721,9.5951189],[-10.9053261,9.5954329],[-10.9065801,9.5960599],[-10.9072591,9.5965819],[-10.9074161,9.5971569],[-10.9067891,9.5990899],[-10.9076771,9.5996649],[-10.9089841,9.6002929],[-10.9109691,9.6017559],[-10.9105511,9.6025389],[-10.9093491,9.6036369],[-10.9090881,9.6048389],[-10.9090881,9.6057269],[-10.9097151,9.6063539],[-10.9108131,9.6069289],[-10.9112831,9.6115279],[-10.9118571,9.6134089],[-10.9126941,9.6153429],[-10.9128501,9.6171709],[-10.9124331,9.6184259],[-10.9131121,9.6196269],[-10.9132161,9.6210899],[-10.9135821,9.6223449],[-10.9141571,9.6230239],[-10.9149411,9.6232849],[-10.9160901,9.6225019],[-10.9168221,9.6221879],[-10.9180761,9.6222919],[-10.9191221,9.6230239],[-10.9194351,9.6240689],[-10.9193301,9.6252709],[-10.9194351,9.6265769],[-10.9192781,9.6279879],[-10.9176061,9.6313329],[-10.9158291,9.6324299],[-10.9152541,9.6334229],[-10.9154111,9.6345729],[-10.9163521,9.6358269],[-10.9179721,9.6367669],[-10.9203761,9.6374469],[-10.9216301,9.6377079],[-10.9224661,9.6387009],[-10.9242431,9.6391719],[-10.9234591,9.6405819],[-10.9218391,9.6417839],[-10.9207411,9.6432999],[-10.9200621,9.6454419],[-10.9198531,9.6464349],[-10.9204801,9.6485779],[-10.9203761,9.6501979],[-10.9198531,9.6516089],[-10.9183371,9.6529669],[-10.9178151,9.6542739],[-10.9178671,9.6548479],[-10.9192781,9.6552139],[-10.9214211,9.6553189],[-10.9231451,9.6556329],[-10.9265421,9.6556849],[-10.9315581,9.6560499],[-10.9324471,9.6565209],[-10.9338061,9.6583499],[-10.9362101,9.6578269],[-10.9374111,9.6569389],[-10.9387181,9.6563119],[-10.9395021,9.6563639],[-10.9422191,9.6577749],[-10.9432641,9.6578799],[-10.9444661,9.6575659],[-10.9452501,9.6568859],[-10.9456161,9.6557889],[-10.9457201,9.6543259],[-10.9459291,9.6533329],[-10.9465041,9.6533329],[-10.9474971,9.6534899],[-10.9488031,9.6531759],[-10.9506851,9.6522359],[-10.9512721,9.6521969],[-10.9514681,9.6521839],[-10.9518871,9.6528629],[-10.9526181,9.6535939],[-10.9554401,9.6544829],[-10.9569561,9.6553709],[-10.9580011,9.6566779],[-10.9587841,9.6580879],[-10.9607181,9.6606489],[-10.9639051,9.6639409],[-10.9639581,9.6651429],[-10.9633311,9.6664499],[-10.9641671,9.6675469],[-10.9644281,9.6690629],[-10.9642721,9.6705779],[-10.9646901,9.6734519],[-10.9655781,9.6759599],[-10.9653691,9.6773189],[-10.9655781,9.6800889],[-10.9663101,9.6815519],[-10.9671451,9.6840599],[-10.9673021,9.6856799],[-10.9670931,9.6877699],[-10.9682431,9.6900699],[-10.9689221,9.6920559],[-10.9706991,9.6963929],[-10.9715881,9.6979079],[-10.9725281,9.7001029],[-10.9726851,9.7021409],[-10.9727371,9.7033949],[-10.9734691,9.7042319],[-10.9749841,9.7048059],[-10.9769701,9.7059039],[-10.9782871,9.7070219],[-10.9790241,9.7080369],[-10.9791261,9.7088509],[-10.9787701,9.7112899],[-10.9782871,9.7124839],[-10.9771951,9.7136779],[-10.9769921,9.7145419],[-10.9772711,9.7155579],[-10.9778301,9.7167269],[-10.9778551,9.7184039],[-10.9772201,9.7224689],[-10.9777031,9.7239429],[-10.9788721,9.7250099],[-10.9805481,9.7258989],[-10.9834201,9.7269399],[-10.9872051,9.7275759],[-10.9873347,9.7276811],[-10.9881451,9.7283379],[-10.9894411,9.7292779],[-10.9899751,9.7302179],[-10.9899241,9.7311319],[-10.9894411,9.7325809],[-10.9913721,9.7354519],[-10.9915501,9.7362649],[-10.9909911,9.7379159],[-10.9903301,9.7394399],[-10.9901781,9.7415239],[-10.9901271,9.7429469],[-10.9904821,9.7442929],[-10.9935821,9.7469609],[-10.9916001,9.7499339],[-10.9915469,9.7501563],[-10.9913211,9.7511019],[-10.9917021,9.7518139],[-10.9929981,9.7526769],[-10.9953351,9.7533129],[-11.0001121,9.7544299],[-11.0024241,9.7554979],[-11.0033381,9.7569709],[-11.0043041,9.7590039],[-11.0055741,9.7603249],[-11.0097921,9.7627129],[-11.0108081,9.7639829],[-11.0111641,9.7656599],[-11.0114181,9.7671849],[-11.0114681,9.7710969],[-11.0121291,9.7716559],[-11.0133481,9.7718599],[-11.0141111,9.7725199],[-11.0145171,9.7735869],[-11.0148221,9.7757209],[-11.0152801,9.7769919],[-11.0157371,9.7776519],[-11.0213771,9.7806499],[-11.0229021,9.7817679],[-11.0241721,9.7840549],[-11.0251881,9.7846639],[-11.0267131,9.7853759],[-11.0269661,9.7859859],[-11.0269661,9.7876119],[-11.0278301,9.7881699],[-11.0302191,9.7883229],[-11.0316921,9.7881199],[-11.0329121,9.7891359],[-11.0339791,9.7892379],[-11.0343764,9.7890987],[-11.0349951,9.7888819],[-11.0359601,9.7880179],[-11.0375361,9.7872049],[-11.0385521,9.7871039],[-11.0390091,9.7874079],[-11.0392131,9.7881199],[-11.0393141,9.7894409],[-11.0400261,9.7933539],[-11.0401154,9.7940477],[-11.0402291,9.7949289],[-11.0405341,9.7957929],[-11.0417531,9.7971639],[-11.0414481,9.7981299],[-11.0417531,9.7988919],[-11.0428711,9.8001119],[-11.0441931,9.8010259],[-11.0459711,9.8013819],[-11.0457681,9.8027029],[-11.0460731,9.8054979],[-11.0458181,9.8073269],[-11.0460731,9.8081909],[-11.0465801,9.8089529],[-11.0459201,9.8105789],[-11.0448531,9.8118999],[-11.0443961,9.8126119],[-11.0451071,9.8140859],[-11.0430751,9.8154569],[-11.0432271,9.8180489],[-11.0439381,9.8184039],[-11.0462761,9.8188109],[-11.0480031,9.8188109],[-11.0501881,9.8186079],[-11.0518141,9.8189129],[-11.0535931,9.8189129],[-11.0553201,9.8187599],[-11.0563881,9.8182009],[-11.0572511,9.8173379],[-11.0580131,9.8163719],[-11.0580651,9.8147459],[-11.0583181,9.8137299],[-11.0595381,9.8132719],[-11.0605541,9.8133229],[-11.0614691,9.8138819],[-11.0618241,9.8146949],[-11.0619771,9.8158639],[-11.0624341,9.8174389],[-11.0635021,9.8189129],[-11.0637551,9.8194719],[-11.0640101,9.8203359],[-11.0637551,9.8214529],[-11.0633491,9.8236889],[-11.0634511,9.8261789],[-11.0637551,9.8279069],[-11.0645181,9.8292789],[-11.0654831,9.8303959],[-11.0668551,9.8314639],[-11.0684301,9.8316159],[-11.0699041,9.8314639],[-11.0707681,9.8314639],[-11.0714791,9.8327339],[-11.0719361,9.8336999],[-11.0739691,9.8355799],[-11.0743251,9.8366459],[-11.0745281,9.8380689],[-11.0749351,9.8392379],[-11.0761031,9.8405079],[-11.0775771,9.8417789],[-11.0791521,9.8427439],[-11.0801171,9.8435059],[-11.0810321,9.8443699],[-11.0833701,9.8453359],[-11.0842331,9.8454879],[-11.0850471,9.8452849],[-11.0861141,9.8448269],[-11.0872821,9.8442169],[-11.0887051,9.8437599],[-11.0901781,9.8435569],[-11.0914491,9.8440649],[-11.0921601,9.8448779],[-11.0918551,9.8470129],[-11.0924141,9.8477239],[-11.0943961,9.8489439],[-11.0943961,9.8495529],[-11.0940911,9.8507219],[-11.0940911,9.8518909],[-11.0943451,9.8527039],[-11.0951581,9.8543299],[-11.0958701,9.855041],[-11.0961751,9.8575819],[-11.0967341,9.8582929],[-11.0971121,9.8585591],[-11.0981051,9.8592579],[-11.1029331,9.8614939],[-11.1036951,9.8604779],[-11.1035931,9.8586999],[-11.1041521,9.8569719],[-11.1065401,9.855752],[-11.1079631,9.855397],[-11.1094881,9.8549399],[-11.1109101,9.8534659],[-11.1122321,9.8544819],[-11.1135021,9.855549],[-11.1148231,9.8558539],[-11.1179741,9.8569719],[-11.1191421,9.8572259],[-11.1209721,9.8571239],[-11.1228521,9.8574799],[-11.1244271,9.8579379],[-11.1323531,9.8550919],[-11.1338271,9.8550919],[-11.1345391,9.855803],[-11.1346911,9.8570229],[-11.1343861,9.8584459],[-11.1351991,9.8596649],[-11.1367741,9.8605289],[-11.1392141,9.8607319],[-11.1401281,9.8615449],[-11.1406871,9.8624089],[-11.1408401,9.8641369],[-11.1408901,9.8652539],[-11.1410941,9.8662709],[-11.1416531,9.8668299],[-11.1430751,9.8673379],[-11.1447521,9.8672869],[-11.1466831,9.8668299],[-11.1476481,9.8668799],[-11.1497321,9.8672869],[-11.1514601,9.8673889],[-11.1526791,9.8671349],[-11.1535431,9.8663219],[-11.1546101,9.8655089],[-11.1559311,9.8655089],[-11.1568961,9.8670839],[-11.1572521,9.8680999],[-11.1568461,9.8701329],[-11.1569471,9.8709459],[-11.1567441,9.8723679],[-11.1556261,9.8734859],[-11.1549661,9.8746549],[-11.1551691,9.8759249],[-11.1557281,9.8768399],[-11.1571001,9.8772969],[-11.1583191,9.8785169],[-11.1585731,9.8794319],[-11.1586241,9.881769],[-11.1603011,9.886545],[-11.1614191,9.890712],[-11.1607581,9.8931],[-11.1606061,9.894625],[-11.1605551,9.897877],[-11.1611651,9.906108],[-11.1615711,9.909463],[-11.1623341,9.910733],[-11.1638071,9.911647],[-11.1647221,9.912358],[-11.1653321,9.913578],[-11.1666021,9.914798],[-11.1670591,9.915966],[-11.1686851,9.917034],[-11.1681261,9.918151],[-11.1683801,9.918914],[-11.1689391,9.919523],[-11.1683301,9.920336],[-11.1679231,9.921403],[-11.1678221,9.922978],[-11.1683801,9.925164],[-11.1686341,9.927094],[-11.1689391,9.92872],[-11.1704641,9.930906],[-11.1705151,9.932227],[-11.1706161,9.932887],[-11.1700571,9.933395],[-11.1690411,9.933599],[-11.1681261,9.933548],[-11.1671611,9.934361],[-11.1654331,9.935377],[-11.1645691,9.936546],[-11.1640101,9.937714],[-11.1640611,9.938629],[-11.1648241,9.93934],[-11.1666021,9.940712],[-11.1673131,9.941627],[-11.1676181,9.94305],[-11.1680761,9.944117],[-11.1696511,9.947217],[-11.1706671,9.948894],[-11.1717341,9.95052],[-11.1729541,9.951434],[-11.1737661,9.952755],[-11.1742241,9.95433],[-11.1746301,9.956566],[-11.1744271,9.958243],[-11.1732581,9.958091],[-11.1718861,9.958853],[-11.1716331,9.959818],[-11.1718861,9.960631],[-11.1727501,9.961241],[-11.1773741,9.963223],[-11.1789501,9.963527],[-11.1797631,9.964036],[-11.1795081,9.965154],[-11.1795081,9.966323],[-11.1802711,9.967491],[-11.1856571,9.969473],[-11.1847931,9.971455],[-11.1869271,9.97181],[-11.1874512,9.972049],[-11.1903831,9.973386],[-11.1921611,9.97364],[-11.1931261,9.973183],[-11.1938381,9.97242],[-11.1946511,9.972217],[-11.1961251,9.972369],[-11.1987671,9.973233],[-11.2005451,9.973894],[-11.2009011,9.974351],[-11.2009521,9.975367],[-11.2022221,9.975469],[-11.2029841,9.975672],[-11.2038481,9.975367],[-11.2056271,9.973284],[-11.2065921,9.972776],[-11.2080661,9.973132],[-11.2091841,9.97303],[-11.2100981,9.973589],[-11.2109621,9.974046],[-11.2125371,9.974504],[-11.2131981,9.975012],[-11.2134521,9.976282],[-11.2140111,9.976892],[-11.2140111,9.977654],[-11.2138071,9.97989],[-11.2138071,9.981058],[-11.2143661,9.981414],[-11.2128421,9.983294],[-11.2121311,9.98426],[-11.2118771,9.985124],[-11.2118771,9.985886],[-11.2113181,9.987004],[-11.2110131,9.988274],[-11.2113181,9.989138],[-11.2109111,9.990306],[-11.2098951,9.990764],[-11.2096411,9.991475],[-11.2094371,9.992644],[-11.2096921,9.993101],[-11.2091841,9.995235],[-11.2085231,9.996658],[-11.2080711,9.999973],[-11.25047,9.9999697],[-11.2841765,9.9999671],[-11.3372351,9.999963],[-11.4138343,9.9999543],[-11.4747266,9.9999474],[-11.4830293,9.9999464],[-11.4903875,9.9999456],[-11.4897051,10.0014452],[-11.4848553,10.0121001],[-11.483278,10.0177956],[-11.4791788,10.0325964],[-11.4536344,10.0543335],[-11.4520576,10.0965615],[-11.4565877,10.0993491],[-11.4772866,10.112085],[-11.4848553,10.1300914],[-11.4716101,10.1493385],[-11.4526883,10.1673429],[-11.4552112,10.1847254],[-11.4731869,10.2045899],[-11.474133,10.2182461],[-11.4608878,10.2377982],[-11.4520576,10.2666587],[-11.431559,10.287449],[-11.4271439,10.3001708],[-11.4306129,10.3122715],[-11.4403892,10.3243717],[-11.4451196,10.3367818],[-11.474133,10.3612901],[-11.4762723,10.3637501],[-11.4790025,10.3668898],[-11.4912515,10.3809748],[-11.4965238,10.3870374],[-11.5551812,10.4410066],[-11.5554966,10.4605448],[-11.5690572,10.4962068],[-11.567165,10.5327947],[-11.5592809,10.5557375],[-11.538467,10.5985181],[-11.5179684,10.6292048],[-11.4817017,10.6521404],[-11.4624646,10.6632976],[-11.4568196,10.6686036],[-11.4561543,10.6686784],[-11.4559756,10.6681341],[-11.4555355,10.6678353],[-11.4554662,10.6681912],[-11.4550883,10.6679986],[-11.455245,10.6674537],[-11.4547477,10.6673179],[-11.4542124,10.6672701],[-11.4538948,10.6676313],[-11.4538748,10.6680252],[-11.4537638,10.6681222],[-11.4534181,10.6679823],[-11.4528607,10.6682268],[-11.4530619,10.6688451],[-11.4537291,10.6689066],[-11.4537413,10.6690694],[-11.4535165,10.6696478],[-11.4537895,10.67004],[-11.4536197,10.6703352],[-11.4533916,10.6715783],[-11.4524521,10.6718861],[-11.4515386,10.6716234],[-11.4511612,10.6720561],[-11.4524573,10.672944],[-11.4536114,10.6736119],[-11.4535945,10.6739006],[-11.4524983,10.6739992],[-11.4516816,10.6739056],[-11.4508737,10.6754224],[-11.4502623,10.6753194],[-11.4500401,10.6745654],[-11.449296,10.6734565],[-11.4480413,10.6746642],[-11.4493368,10.6752129],[-11.4490894,10.6758401],[-11.4507166,10.6762177],[-11.4516861,10.6774086],[-11.4519587,10.6773057],[-11.4521733,10.677619],[-11.4519339,10.6779111],[-11.4520503,10.6780874],[-11.4515218,10.6782214],[-11.4506874,10.6785175],[-11.4505385,10.6793465],[-11.4511016,10.6798997],[-11.4518504,10.6798997],[-11.4525821,10.6802509],[-11.451809,10.6807327],[-11.4519003,10.6822579],[-11.4522773,10.6827591],[-11.452553,10.6833462],[-11.4523501,10.6840962],[-11.4534316,10.6845259],[-11.453809,10.6848085],[-11.4536264,10.6852928],[-11.45294,10.6862285],[-11.4531973,10.6871345],[-11.4529465,10.687469],[-11.4518507,10.687849],[-11.4515247,10.6883094],[-11.4510618,10.6882473],[-11.450564,10.688783],[-11.4499952,10.689901],[-11.4509044,10.6913877],[-11.4515952,10.6922197],[-11.4521115,10.6923655],[-11.45197,10.6926502],[-11.4515632,10.6927359],[-11.4509243,10.6921472],[-11.4502755,10.6912593],[-11.4498531,10.6914828],[-11.4499272,10.6921868],[-11.4505935,10.6932427],[-11.4506554,10.6936759],[-11.451343,10.6943289],[-11.4527899,10.6947831],[-11.4528784,10.6953065],[-11.4525527,10.6963845],[-11.4543677,10.6957847],[-11.4547258,10.6959993],[-11.4554653,10.6962617],[-11.4556145,10.6966039],[-11.4546754,10.6976735],[-11.4550222,10.698787],[-11.455551,10.6992857],[-11.4557401,10.7009308],[-11.4562822,10.701398],[-11.456324,10.7016854],[-11.4567091,10.7021206],[-11.4563295,10.7024931],[-11.4562456,10.7027725],[-11.4565853,10.7033357],[-11.4565196,10.7034891],[-11.4560822,10.7035674],[-11.4556843,10.7038395],[-11.4561449,10.7043204],[-11.4566195,10.704293],[-11.4567384,10.7040593],[-11.4570136,10.7039234],[-11.4574199,10.7044731],[-11.4579407,10.7047369],[-11.4581588,10.7050271],[-11.458103,10.7054831],[-11.457963,10.7056483],[-11.457649,10.7054852],[-11.4571344,10.7053912],[-11.4567632,10.7055955],[-11.4567002,10.7057459],[-11.456373,10.7057551],[-11.4560185,10.7059039],[-11.4558895,10.7063667],[-11.4559899,10.7066703],[-11.4564849,10.7068479],[-11.4571359,10.7072317],[-11.4575492,10.7076276],[-11.4577352,10.7078937],[-11.4574858,10.7080931],[-11.4574327,10.7087166],[-11.4575382,10.7091944],[-11.4574487,10.7095995],[-11.4574738,10.7103869],[-11.4567321,10.7106066],[-11.4566275,10.7110093],[-11.4571748,10.7115191],[-11.4573224,10.7119208],[-11.4573807,10.7126359],[-11.4574796,10.7130752],[-11.4578322,10.7134656],[-11.4581943,10.7139596],[-11.4585475,10.7142861],[-11.4586609,10.7146115],[-11.4586397,10.7149921],[-11.4588524,10.7155745],[-11.4591174,10.7158535],[-11.4594857,10.7159086],[-11.4601919,10.7163848],[-11.4611813,10.7166182],[-11.4614679,10.7166387],[-11.4618077,10.7167765],[-11.4624432,10.7167819],[-11.4625031,10.7169248],[-11.4624519,10.717135],[-11.4621803,10.7175125],[-11.4619883,10.7175446],[-11.4617035,10.7175129],[-11.4613502,10.7175745],[-11.4602196,10.7178665],[-11.4599524,10.7179859],[-11.4594983,10.718504],[-11.4589884,10.7193909],[-11.458769,10.7196408],[-11.458815,10.7199684],[-11.4589163,10.720221],[-11.4592583,10.7203587],[-11.4593488,10.7204773],[-11.459344,10.7210116],[-11.4591725,10.7212672],[-11.4592086,10.7215159],[-11.4594896,10.7218948],[-11.4596088,10.7221965],[-11.4598877,10.7223834],[-11.460128,10.7224422],[-11.4603815,10.7222423],[-11.4606821,10.7220821],[-11.4616858,10.7219957],[-11.4614995,10.7225498],[-11.4612383,10.7228737],[-11.4608898,10.723092],[-11.4605703,10.7232303],[-11.4603337,10.7234],[-11.4602342,10.7237359],[-11.460224,10.7247995],[-11.4603643,10.7252275],[-11.4608539,10.7251263],[-11.4615569,10.7247441],[-11.4618152,10.7247155],[-11.4619285,10.7248392],[-11.461882,10.7249549],[-11.4617494,10.7249833],[-11.4615041,10.72488],[-11.4612652,10.7250287],[-11.4612573,10.72536],[-11.4614021,10.7254804],[-11.4614317,10.7258146],[-11.4612934,10.7259655],[-11.4606727,10.7260933],[-11.4605321,10.7263894],[-11.4604643,10.7268303],[-11.4604759,10.7271619],[-11.4605858,10.7274588],[-11.4613058,10.7276583],[-11.4613356,10.7277596],[-11.4612698,10.727866],[-11.4609936,10.7278428],[-11.4602545,10.7282201],[-11.4600813,10.728567],[-11.4603347,10.7287993],[-11.4608484,10.7287453],[-11.4612639,10.7285744],[-11.4614206,10.7285824],[-11.4616592,10.7287387],[-11.4621494,10.72879],[-11.4624221,10.7287761],[-11.4627803,10.729128],[-11.4629467,10.7293514],[-11.4633996,10.7296635],[-11.463482,10.7298986],[-11.4633699,10.7301455],[-11.4624938,10.7314035],[-11.4623054,10.731815],[-11.4626942,10.732019],[-11.4633785,10.7315166],[-11.4635696,10.731114],[-11.4640678,10.7306396],[-11.4642867,10.7305479],[-11.4645112,10.730696],[-11.464387,10.7309933],[-11.4641084,10.7311306],[-11.4640339,10.7314968],[-11.4642309,10.7320783],[-11.4640861,10.7326132],[-11.4639815,10.7328234],[-11.4637416,10.7330367],[-11.4636129,10.7339095],[-11.4636378,10.7342627],[-11.4633905,10.7345836],[-11.4631025,10.7347437],[-11.4628183,10.734796],[-11.4625535,10.7347699],[-11.4619598,10.734828],[-11.4617139,10.7348058],[-11.4614296,10.7345549],[-11.4611362,10.7341971],[-11.4608489,10.7334778],[-11.4605728,10.7330959],[-11.4602676,10.7328374],[-11.4600325,10.7323851],[-11.4600001,10.732194],[-11.4600353,10.7318997],[-11.4597282,10.7320965],[-11.458927,10.732481],[-11.4588047,10.7326268],[-11.4585198,10.7327412],[-11.4584151,10.733084],[-11.458529,10.733406],[-11.4594763,10.7340416],[-11.4600922,10.7343126],[-11.4602196,10.734722],[-11.460056,10.7348068],[-11.4597818,10.7348024],[-11.4593325,10.7345611],[-11.4589153,10.7344484],[-11.4584349,10.734651],[-11.4580856,10.7350733],[-11.4578526,10.7352331],[-11.457438,10.7358632],[-11.4574145,10.7360172],[-11.45646,10.736078],[-11.4559309,10.736186],[-11.4558905,10.7364916],[-11.4560649,10.7367971],[-11.4564348,10.7367397],[-11.4566323,10.7369127],[-11.457235,10.7366982],[-11.4574252,10.7367198],[-11.4574873,10.736852],[-11.4574433,10.7374319],[-11.4572257,10.7377992],[-11.4568716,10.7382548],[-11.4567207,10.7386607],[-11.4569607,10.7389179],[-11.4575035,10.7390744],[-11.4579248,10.7390219],[-11.4589736,10.7384839],[-11.4600957,10.738556],[-11.4606429,10.7385506],[-11.4613553,10.737106],[-11.4615754,10.7370942],[-11.4616505,10.7375476],[-11.4614523,10.7380766],[-11.461644,10.7387965],[-11.4615202,10.7393983],[-11.4606559,10.7401896],[-11.4592149,10.7412699],[-11.4590304,10.7416052],[-11.4592502,10.7418091],[-11.4598232,10.7416993],[-11.460188,10.7418755],[-11.4606866,10.7423722],[-11.4615309,10.7426557],[-11.4620038,10.7425396],[-11.4627943,10.7426079],[-11.4630461,10.7428497],[-11.4633238,10.7437149],[-11.4641203,10.7444448],[-11.4641915,10.7450929],[-11.4642653,10.7453509],[-11.4647404,10.7456596],[-11.4655989,10.7457184],[-11.4663201,10.7464854],[-11.4676201,10.7471616],[-11.4681721,10.7472037],[-11.4682137,10.7473971],[-11.4676999,10.7476621],[-11.4675433,10.7483544],[-11.4672729,10.7488858],[-11.4672914,10.7492221],[-11.4697332,10.7502643],[-11.470876,10.7504021],[-11.4717083,10.7500881],[-11.4722429,10.7502902],[-11.4724323,10.7507615],[-11.472694,10.7511784],[-11.4737061,10.7521661],[-11.4746767,10.7530054],[-11.4751831,10.7532951],[-11.4752807,10.7536361],[-11.4751521,10.7538382],[-11.4746867,10.7540639],[-11.4739319,10.7539663],[-11.4732995,10.7540685],[-11.4732523,10.7548036],[-11.473543,10.7555838],[-11.4745687,10.756857],[-11.475273,10.7572128],[-11.4754548,10.7575031],[-11.4753825,10.7580953],[-11.4745693,10.7588672],[-11.4746348,10.7591679],[-11.4750833,10.7593092],[-11.4763138,10.7588955],[-11.4764757,10.7590585],[-11.4763447,10.7592412],[-11.4756975,10.7592936],[-11.4752538,10.7597551],[-11.4756307,10.7601166],[-11.4771806,10.7605613],[-11.4782262,10.7609496],[-11.4782946,10.7615303],[-11.4785093,10.7621138],[-11.4788736,10.762485],[-11.4791404,10.7632712],[-11.4800474,10.7635379],[-11.4800567,10.7637716],[-11.4798673,10.7640748],[-11.4799671,10.7644506],[-11.4804766,10.7649442],[-11.4809196,10.7655038],[-11.4814277,10.7656452],[-11.4817457,10.7652335],[-11.4828285,10.76499],[-11.4845652,10.7646936],[-11.4852994,10.7647405],[-11.485322,10.7648959],[-11.4851504,10.7651352],[-11.4840002,10.7657563],[-11.4835394,10.7662444],[-11.4833274,10.7669214],[-11.4836488,10.7673505],[-11.4841933,10.7674259],[-11.484586,10.7677168],[-11.4846689,10.7679447],[-11.4845989,10.7686112],[-11.4849212,10.7689673],[-11.4866536,10.769426],[-11.4869783,10.7697734],[-11.4867698,10.7712642],[-11.4862719,10.7727519],[-11.4864594,10.7731035],[-11.4882766,10.7738216],[-11.4886614,10.7741701],[-11.4886614,10.7746391],[-11.4878777,10.7768751],[-11.488023,10.7773033],[-11.4892116,10.7772775],[-11.4899463,10.7782183],[-11.4905581,10.7786834],[-11.4911427,10.7786298],[-11.4920419,10.7778],[-11.4930518,10.7775519],[-11.4937985,10.7766051],[-11.4942343,10.7764642],[-11.4949225,10.7772767],[-11.4960275,10.7773055],[-11.4965757,10.7769105],[-11.4973334,10.7759489],[-11.4982681,10.7755266],[-11.4989293,10.774348],[-11.4997321,10.7737872],[-11.4998718,10.774006],[-11.4998298,10.7749139],[-11.5018012,10.7760215],[-11.5021089,10.7763238],[-11.5036125,10.7764639],[-11.5035968,10.7766528],[-11.5030813,10.7772118],[-11.5029464,10.7778009],[-11.5035953,10.7794181],[-11.5036914,10.78047],[-11.5042092,10.7811259],[-11.5043946,10.7820436],[-11.506431,10.7823465],[-11.5069111,10.7820085],[-11.5069969,10.7810113],[-11.5069443,10.7795198],[-11.5084378,10.7782595],[-11.5096384,10.777421],[-11.5099006,10.7760924],[-11.5102638,10.7753975],[-11.5107114,10.7751724],[-11.5108499,10.7754163],[-11.5109506,10.7759305],[-11.5111973,10.7764593],[-11.511647,10.7766229],[-11.5121362,10.7763751],[-11.5127546,10.7757541],[-11.5143645,10.7743301],[-11.5153391,10.7740497],[-11.5156116,10.7733291],[-11.5170957,10.7721131],[-11.517974,10.7714902],[-11.5185897,10.7713657],[-11.519294,10.7719902],[-11.5194459,10.7724378],[-11.5191017,10.7730056],[-11.5190012,10.7736261],[-11.5190962,10.7742217],[-11.5194233,10.7746114],[-11.5197247,10.7752759],[-11.5202301,10.7760845],[-11.5210941,10.7761456],[-11.5213218,10.775828],[-11.5215318,10.7757321],[-11.5218817,10.775976],[-11.5221522,10.7764581],[-11.5222315,10.7769313],[-11.5217264,10.7778774],[-11.5218841,10.7798099],[-11.5218774,10.7813131],[-11.5214163,10.7820975],[-11.5215945,10.782737],[-11.5222043,10.7831004],[-11.5223477,10.7834156],[-11.5226565,10.783577],[-11.5228561,10.785202],[-11.5234791,10.7860341],[-11.5242702,10.7867837],[-11.5252775,10.7870294],[-11.5257756,10.7875125],[-11.5261523,10.7884441],[-11.5261523,10.7893309],[-11.5266073,10.7897778],[-11.5284869,10.7928556],[-11.5283144,10.7937224],[-11.52872,10.7953766],[-11.5290106,10.796226],[-11.5295856,10.7965883],[-11.5306084,10.7970519],[-11.5309918,10.7980649],[-11.531616,10.7988175],[-11.5330305,10.7993454],[-11.5338343,10.799087],[-11.5352994,10.7976341],[-11.5353936,10.7966964],[-11.5358999,10.7962875],[-11.5364005,10.7967192],[-11.5370293,10.7969777],[-11.5383718,10.7966367],[-11.5388284,10.797726],[-11.5405787,10.7982286],[-11.5408414,10.7992336],[-11.5424954,10.7992192],[-11.5431345,10.7986044],[-11.5438179,10.7989516],[-11.5440911,10.7995903],[-11.5448757,10.8007667],[-11.5464481,10.8021132],[-11.546688,10.8028326],[-11.5464742,10.804027],[-11.546503,10.8051292],[-11.5475976,10.8058146],[-11.5479167,10.8070546],[-11.5494053,10.8072078],[-11.5501611,10.8073641],[-11.5510456,10.8077383],[-11.553839,10.8080415],[-11.5540132,10.8082126],[-11.553869,10.8084582],[-11.5532059,10.8087136],[-11.552078,10.8093486],[-11.5511385,10.8102443],[-11.5506721,10.8110031],[-11.5509863,10.8118261],[-11.5528642,10.8130285],[-11.5534276,10.8130773],[-11.5537283,10.8123601],[-11.5569301,10.810447],[-11.5595016,10.8099577],[-11.5610194,10.80952],[-11.5619235,10.8081207],[-11.5624073,10.8077643],[-11.5636376,10.808119],[-11.564153,10.8079067],[-11.5641814,10.807293],[-11.5646668,10.806755],[-11.5656392,10.8064064],[-11.5665051,10.8061722],[-11.5673927,10.8071723],[-11.5686612,10.8079251],[-11.5687944,10.8092392],[-11.5691814,10.8096193],[-11.5698068,10.8095578],[-11.5702717,10.809144],[-11.5714915,10.807653],[-11.5729066,10.8062499],[-11.5754606,10.8061443],[-11.5762641,10.8057233],[-11.5769272,10.8058062],[-11.5771976,10.8062105],[-11.5772829,10.8070485],[-11.5785817,10.8074929],[-11.5792966,10.8073001],[-11.5814539,10.8070167],[-11.5819627,10.8064357],[-11.5823808,10.8062874],[-11.5832585,10.8067315],[-11.5846082,10.8066625],[-11.586911,10.8055182],[-11.587399,10.8054714],[-11.5877474,10.80579],[-11.5883611,10.8067144],[-11.5891837,10.8072531],[-11.5907012,10.807048],[-11.5917362,10.80685],[-11.5923168,10.80685],[-11.5916873,10.8101993],[-11.5920442,10.8132191],[-11.5939175,10.8157658],[-11.5952046,10.8199404],[-11.5949139,10.8217571],[-11.5929021,10.8249134],[-11.5915475,10.8289857],[-11.5918449,10.8298476],[-11.593546,10.8305159],[-11.5942107,10.8317336],[-11.5934072,10.8342436],[-11.5923458,10.835173],[-11.5910948,10.8349],[-11.5894606,10.8328969],[-11.5884323,10.8325749],[-11.5876474,10.8334199],[-11.5879027,10.8347014],[-11.5886536,10.8367614],[-11.5869427,10.8372997],[-11.587214,10.8396139],[-11.5892562,10.8415528],[-11.5898097,10.842785],[-11.5877583,10.8434312],[-11.5863897,10.8442177],[-11.5867528,10.8449014],[-11.5870097,10.8465033],[-11.5858963,10.8471489],[-11.5858963,10.8477361],[-11.5865864,10.8485765],[-11.5868884,10.849318],[-11.5865428,10.8500453],[-11.5852152,10.8507922],[-11.583519,10.8503559],[-11.5826998,10.850663],[-11.5821084,10.8521353],[-11.5798582,10.8544512],[-11.5783257,10.8564669],[-11.5779092,10.8581849],[-11.5780346,10.8587699],[-11.5798822,10.8593965],[-11.5797478,10.8599573],[-11.5790389,10.8607218],[-11.579223,10.8615054],[-11.5798356,10.8619115],[-11.5816109,10.8615444],[-11.5826317,10.8629839],[-11.5833742,10.8637259],[-11.583317,10.8642197],[-11.5826009,10.8647904],[-11.5823127,10.8668523],[-11.5818779,10.8679542],[-11.5823362,10.8686293],[-11.5826167,10.8692555],[-11.5822212,10.8711577],[-11.5826622,10.8717032],[-11.5836331,10.8713992],[-11.5843199,10.871616],[-11.5858378,10.874238],[-11.5870874,10.8745346],[-11.5880971,10.8754384],[-11.5879974,10.8763439],[-11.5872732,10.8773843],[-11.5868351,10.878675],[-11.5872525,10.8794802],[-11.5884878,10.8799351],[-11.5901519,10.8803273],[-11.5906546,10.8809173],[-11.5905834,10.8814305],[-11.5887954,10.8837936],[-11.5882141,10.8848265],[-11.5879905,10.8864188],[-11.5886173,10.8876499],[-11.5880762,10.8886866],[-11.5879796,10.8908414],[-11.5887422,10.8930605],[-11.589347,10.8934356],[-11.5904759,10.892665],[-11.5913565,10.8928599],[-11.5920317,10.8936631],[-11.5926871,10.894783],[-11.5925851,10.8957971],[-11.5914794,10.8972095],[-11.5907303,10.8994368],[-11.5909958,10.9010616],[-11.5908237,10.9015688],[-11.5892174,10.9015688],[-11.5880659,10.902197],[-11.5875041,10.9031093],[-11.5875263,10.9038056],[-11.5881593,10.9049844],[-11.5898494,10.9050057],[-11.5912994,10.904003],[-11.5929689,10.904043],[-11.5944293,10.9032351],[-11.5952726,10.9030846],[-11.5968713,10.9039987],[-11.5991904,10.9042957],[-11.5995864,10.9049674],[-11.5988289,10.9065726],[-11.598516,10.9078018],[-11.5988636,10.9126011],[-11.5981131,10.9173815],[-11.5958675,10.9206688]]]]}]}
