# Supplementary material
Source: ML conference proceedings conference paper supplement (https://proceedings.neurips.cc/paper_files/paper/2022/hash/9d3faa41886997cfc2128b930077fa49-Abstract.html)
Supplement: Supplementary file 1 [file 9d3faa41886997cfc2128b930077fa49-Supplemental-Conference.zip › code/ebola/map/geojson/gbarpolu.geojson]

{"type":"GeometryCollection","geometries":[{"type":"MultiPolygon","coordinates":[[[[-10.9387235,6.9893941],[-10.9234403,6.9821155],[-10.9037242,6.9780835],[-10.9028041,6.9778714],[-10.8915651,6.9757026],[-10.8913124,6.9756539],[-10.8788361,6.9733112],[-10.8698094,6.9718852],[-10.8692949,6.97172],[-10.8673668,6.9709439],[-10.8656306,6.9696595],[-10.8572762,6.9749511],[-10.8520723,6.9739323],[-10.8469856,6.9729362],[-10.8463339,6.973097],[-10.8398672,6.9746915],[-10.8280267,6.9775008],[-10.8274665,6.9776358],[-10.8227901,6.973818],[-10.8224292,6.9736369],[-10.821127,6.972983],[-10.8048452,6.9648103],[-10.7962606,6.9602442],[-10.7864401,6.9555707],[-10.7738992,6.9460601],[-10.7710836,6.9442329],[-10.7681183,6.9415354],[-10.760548,6.9390785],[-10.7702099,6.9094737],[-10.7722413,6.9057589],[-10.7593992,6.8506092],[-10.7588059,6.8190539],[-10.7395483,6.8021557],[-10.7131252,6.8043792],[-10.6852121,6.8493384],[-10.6829705,6.8548372],[-10.6816424,6.8581123],[-10.6768259,6.8680514],[-10.6752119,6.871488],[-10.6711433,6.8718668],[-10.6394321,6.8748438],[-10.6280165,6.8758759],[-10.6061644,6.8789846],[-10.6044394,6.8774909],[-10.6016721,6.8774714],[-10.6012557,6.8772648],[-10.5962362,6.877636],[-10.5873534,6.8790428],[-10.5838269,6.880746],[-10.5831553,6.8809054],[-10.5779645,6.8800375],[-10.5774348,6.8811232],[-10.5441024,6.8754773],[-10.5374321,6.8687534],[-10.5369966,6.8683146],[-10.5354338,6.8681992],[-10.5346324,6.868],[-10.5340707,6.8679735],[-10.5299085,6.8677771],[-10.5293662,6.8676668],[-10.5042053,6.8612157],[-10.5039251,6.862303],[-10.5036986,6.8632058],[-10.5026746,6.8654166],[-10.4910853,6.8761538],[-10.482812,6.8866403],[-10.4760645,6.8920062],[-10.4728349,6.8945742],[-10.4681199,6.8965799],[-10.4493674,6.9025611],[-10.4492196,6.9027724],[-10.4466706,6.9064166],[-10.4461302,6.9071575],[-10.4321709,6.926564],[-10.4351874,6.9313094],[-10.4359098,6.9324461],[-10.4399378,6.9388037],[-10.4400135,6.938952],[-10.4393019,6.9396857],[-10.4338557,6.9457762],[-10.4304773,6.949565],[-10.4289689,6.9512696],[-10.4233121,6.9575192],[-10.4177954,6.9636281],[-10.4170226,6.9645414],[-10.4099486,6.9656806],[-10.3961689,6.9679552],[-10.3817449,6.9665275],[-10.3747471,6.9655598],[-10.363079,6.9642332],[-10.3616194,6.9640707],[-10.3552613,6.9697376],[-10.3414284,6.9839852],[-10.3362512,6.9862789],[-10.3371397,6.9869891],[-10.3333939,6.990747],[-10.3041965,7.019685],[-10.2857046,7.0373741],[-10.283727,7.0392658],[-10.2733976,7.0491747],[-10.2438224,7.0774957],[-10.2354817,7.0873514],[-10.2355362,7.0887892],[-10.2355524,7.0892401],[-10.2350185,7.0890399],[-10.2345157,7.0893118],[-10.2361538,7.109867],[-10.2365344,7.1146423],[-10.2362471,7.1148037],[-10.2357781,7.1147462],[-10.2349678,7.1253336],[-10.2338134,7.1282155],[-10.2338151,7.128852],[-10.2334492,7.1291248],[-10.2195971,7.1394468],[-10.1909694,7.1468365],[-10.1895992,7.1472492],[-10.1637394,7.153554],[-10.156772,7.1525778],[-10.1512264,7.1495189],[-10.141833,7.1482852],[-10.1388187,7.1471898],[-10.1378714,7.1470972],[-10.1377112,7.1470818],[-10.1268877,7.1460276],[-10.12517,7.1458605],[-10.1131566,7.1477521],[-10.1125348,7.1472596],[-10.1123408,7.1469506],[-10.1122144,7.1461131],[-10.1127515,7.1451369],[-10.1130539,7.1445636],[-10.1130546,7.1439984],[-10.1131577,7.1434037],[-10.1132615,7.1425797],[-10.1136316,7.1417198],[-10.1136903,7.1409406],[-10.113758,7.1394851],[-10.1132028,7.1391851],[-10.1123904,7.138473],[-10.1119075,7.1383073],[-10.1110815,7.1384909],[-10.1105715,7.1384237],[-10.1103684,7.1382983],[-10.1101788,7.1378191],[-10.1096056,7.137013],[-10.1094679,7.1367113],[-10.1094168,7.1361104],[-10.1095785,7.1359203],[-10.1099667,7.1357814],[-10.1103819,7.1355485],[-10.1108152,7.1350559],[-10.1114832,7.1332287],[-10.1118443,7.1316791],[-10.1118849,7.1307566],[-10.1118127,7.1304923],[-10.1114697,7.1297131],[-10.1113523,7.1292204],[-10.1111763,7.1276529],[-10.1109371,7.1273215],[-10.1095695,7.1267572],[-10.1082877,7.1261481],[-10.1080936,7.1258929],[-10.1080575,7.1251808],[-10.1084412,7.1242768],[-10.1086506,7.123374],[-10.1095398,7.1217662],[-10.1100092,7.1210989],[-10.1106681,7.1206331],[-10.1108975,7.120366],[-10.1117551,7.1190851],[-10.1118905,7.1184849],[-10.1117732,7.1181356],[-10.111898,7.1174993],[-10.1147512,7.1143545],[-10.1153767,7.1129104],[-10.1152107,7.1124417],[-10.1141384,7.1123911],[-10.1115725,7.1117197],[-10.1107171,7.111175],[-10.1091023,7.1099511],[-10.1090193,7.1098371],[-10.1090831,7.1096407],[-10.1097725,7.1091594],[-10.1111767,7.1085006],[-10.1115597,7.108526],[-10.1127469,7.1090707],[-10.1137618,7.1092734],[-10.1139597,7.1092417],[-10.114132,7.109058],[-10.1149299,7.1073859],[-10.1156193,7.1064358],[-10.1157661,7.1060177],[-10.1160278,7.1057834],[-10.1168831,7.1058087],[-10.1171256,7.1059671],[-10.1172533,7.1061824],[-10.1178725,7.1069678],[-10.1188107,7.1074745],[-10.119098,7.1073542],[-10.1208661,7.104998],[-10.122449,7.1024707],[-10.1229724,7.1019894],[-10.124715,7.1007796],[-10.1254745,7.1002095],[-10.1257235,7.0995508],[-10.125698,7.0981193],[-10.1253469,7.0959847],[-10.1255256,7.0952246],[-10.1253724,7.0947496],[-10.1249256,7.0943695],[-10.1241277,7.0932927],[-10.1237831,7.0929127],[-10.1233774,7.0929914],[-10.1222239,7.0939926],[-10.1205923,7.0951284],[-10.1200474,7.0955483],[-10.1190331,7.0954182],[-10.119067,7.094434],[-10.1191832,7.0940491],[-10.1209204,7.0934939],[-10.1219055,7.0928873],[-10.1220924,7.0924097],[-10.1220698,7.0916594],[-10.1218729,7.0913713],[-10.1214545,7.0913234],[-10.1209395,7.0912733],[-10.1204572,7.0915728],[-10.1199841,7.091779],[-10.1194899,7.0919168],[-10.1186607,7.0923805],[-10.1181686,7.092448],[-10.1174378,7.0929788],[-10.1170949,7.0931816],[-10.1167844,7.0931504],[-10.1165503,7.0930342],[-10.1164936,7.0923076],[-10.1163257,7.0915767],[-10.1160029,7.0909534],[-10.1160137,7.0904803],[-10.11653,7.0901897],[-10.1174002,7.0900613],[-10.118094,7.089716],[-10.1182236,7.0894131],[-10.11813,7.0890078],[-10.1172868,7.0885965],[-10.1168106,7.0867512],[-10.1167401,7.0855878],[-10.1163528,7.0841449],[-10.1162348,7.0840211],[-10.1153366,7.0836843],[-10.1145289,7.0824439],[-10.1136145,7.0807697],[-10.1134812,7.0801183],[-10.1136568,7.0798389],[-10.1144836,7.0798345],[-10.1148439,7.0796086],[-10.1149325,7.0791129],[-10.115289,7.0773567],[-10.1157144,7.0757709],[-10.1164675,7.074612],[-10.1168973,7.0735323],[-10.1163335,7.0732905],[-10.1158297,7.0728288],[-10.1153288,7.0722018],[-10.1143981,7.071761],[-10.1131375,7.0721977],[-10.112054,7.0720456],[-10.1112105,7.0710661],[-10.111102,7.0696519],[-10.1108276,7.0686583],[-10.1097317,7.0682402],[-10.1093631,7.0674198],[-10.1098151,7.066652],[-10.1124232,7.0650719],[-10.1126327,7.0646101],[-10.11216,7.0639194],[-10.1118787,7.0637968],[-10.1099965,7.0643343],[-10.109615,7.0642325],[-10.108455,7.063393],[-10.1083133,7.0631348],[-10.1084449,7.0626188],[-10.1083335,7.0617374],[-10.1078129,7.060613],[-10.1055839,7.0579286],[-10.1055754,7.0576727],[-10.106093,7.0566805],[-10.1064387,7.0563837],[-10.1110811,7.056896],[-10.1117444,7.0567984],[-10.1169042,7.0530768],[-10.1171921,7.0519413],[-10.1171674,7.0503828],[-10.11598,7.0497872],[-10.1147121,7.0491225],[-10.1142877,7.0485765],[-10.1131153,7.0460689],[-10.111989,7.0454196],[-10.1113219,7.0457189],[-10.1110321,7.0467821],[-10.1115401,7.048153],[-10.1091517,7.0503601],[-10.1082512,7.0503773],[-10.101535,7.0427677],[-10.1033494,7.0400268],[-10.0999675,7.0384125],[-10.0921556,7.0399796],[-10.0831365,7.0434643],[-10.0757119,7.0512234],[-10.0710849,7.0528722],[-10.0685719,7.0552081],[-10.0680968,7.0601964],[-10.0669229,7.0611048],[-10.0656023,7.0631366],[-10.0649105,7.064676],[-10.0639253,7.0669713],[-10.0633453,7.0688844],[-10.0627038,7.0698796],[-10.0608019,7.0716304],[-10.05742,7.0732669],[-10.0568589,7.0733671],[-10.0560225,7.0735165],[-10.0527804,7.0746815],[-10.050768,7.0756523],[-10.0506842,7.0769004],[-10.0495662,7.0778712],[-10.0471066,7.0778435],[-10.0450663,7.0782318],[-10.0420757,7.0802843],[-10.0375086,7.0822006],[-10.0355724,7.0858846],[-10.0313805,7.0857914],[-10.0291571,7.0877684],[-10.0276446,7.0917415],[-10.0269853,7.0924484],[-10.0215671,7.093642],[-10.01531,7.0927979],[-10.0079581,7.0964456],[-10.0083138,7.1033491],[-10.0073652,7.1066438],[-10.0083138,7.1098992],[-9.9938865,7.1171947],[-9.9847559,7.1204894],[-9.9767319,7.1233526],[-9.9728583,7.1261373],[-9.9693009,7.1262157],[-9.9647553,7.1288435],[-9.9596564,7.1302947],[-9.9507028,7.1339493],[-9.9485098,7.1348444],[-9.9451173,7.1354028],[-9.9434504,7.132648],[-9.9452291,7.1293926],[-9.9435942,7.127007],[-9.9432133,7.1264511],[-9.9390234,7.1273924],[-9.9359403,7.1309223],[-9.9321286,7.1304139],[-9.9286584,7.1265028],[-9.9252713,7.1259128],[-9.9232994,7.1262542],[-9.9225343,7.1283855],[-9.9182372,7.1296957],[-9.9163766,7.130788],[-9.9139288,7.1338582],[-9.9114001,7.1357354],[-9.9109646,7.1375767],[-9.9077578,7.140649],[-9.9031727,7.1400607],[-9.8998695,7.1417527],[-9.9003645,7.1473527],[-9.9052921,7.1530888],[-9.9028709,7.1568979],[-9.8967159,7.1585983],[-9.8898441,7.1556189],[-9.8853064,7.1585211],[-9.8784025,7.1585165],[-9.8743985,7.1616285],[-9.8711507,7.1642046],[-9.8639909,7.1679585],[-9.864889,7.1757297],[-9.8586404,7.1801055],[-9.8528091,7.1835047],[-9.8469619,7.1816632],[-9.8429409,7.184623],[-9.8359514,7.189195],[-9.8291,7.1970296],[-9.8235883,7.1972773],[-9.8191647,7.2032447],[-9.8159318,7.2043871],[-9.8154998,7.2054396],[-9.8097066,7.2104603],[-9.8075929,7.2122704],[-9.8053709,7.2123882],[-9.8038643,7.2108948],[-9.8035107,7.209575],[-9.8026897,7.2090471],[-9.8020519,7.2098278],[-9.8003315,7.2124578],[-9.7996362,7.2151785],[-9.7984827,7.2173439],[-9.7965519,7.2209525],[-9.7942352,7.2240353],[-9.7920142,7.2264949],[-9.7921889,7.2312403],[-9.7927179,7.2336803],[-9.7925573,7.2356738],[-9.791501,7.2370564],[-9.7900073,7.2376375],[-9.7894794,7.2390738],[-9.7899116,7.2404443],[-9.7904418,7.2417945],[-9.7894901,7.2447919],[-9.7887533,7.2464773],[-9.7879944,7.2470822],[-9.7847237,7.2488869],[-9.783155,7.2512186],[-9.7822406,7.2529818],[-9.7810841,7.254033],[-9.7797595,7.2543227],[-9.7792096,7.2539997],[-9.7788548,7.2530574],[-9.7777268,7.2520747],[-9.7763285,7.2517515],[-9.7740264,7.2517732],[-9.7716099,7.2527945],[-9.7707596,7.2528922],[-9.7691475,7.2523101],[-9.7667107,7.2503859],[-9.7651462,7.2499574],[-9.7642889,7.2508032],[-9.7632247,7.2548741],[-9.7638656,7.2562634],[-9.7680007,7.2579302],[-9.7694125,7.2592377],[-9.7696375,7.2609728],[-9.7726551,7.2666352],[-9.7740002,7.2676886],[-9.7754538,7.2683995],[-9.7793684,7.2685196],[-9.7802871,7.2683399],[-9.7811929,7.2675254],[-9.7827174,7.2654373],[-9.7835676,7.2647725],[-9.7843527,7.2647143],[-9.7853509,7.2655633],[-9.7854197,7.2672728],[-9.7847879,7.2714076],[-9.7855981,7.2727432],[-9.7897884,7.2753377],[-9.7904597,7.2766444],[-9.7900399,7.2774056],[-9.7873784,7.2774203],[-9.783196,7.2760189],[-9.7817168,7.276171],[-9.7790124,7.279192],[-9.7747102,7.2840141],[-9.7723631,7.2860106],[-9.7690637,7.2916307],[-9.7673238,7.2937149],[-9.7654916,7.2940881],[-9.764741,7.2958116],[-9.7646609,7.2980925],[-9.7644005,7.2992962],[-9.7652443,7.3008265],[-9.7654897,7.3024213],[-9.7650454,7.3035541],[-9.7638957,7.3061927],[-9.7632,7.3088525],[-9.7619505,7.3114941],[-9.7603156,7.314213],[-9.7603796,7.3155653],[-9.7613849,7.3166545],[-9.7615005,7.3177835],[-9.7604374,7.3223806],[-9.7595627,7.3232562],[-9.7573227,7.3241837],[-9.7568039,7.324904],[-9.7576904,7.3277726],[-9.7578709,7.3323789],[-9.7559002,7.3352796],[-9.7538517,7.3404873],[-9.7518969,7.3450194],[-9.7507495,7.346122],[-9.7474741,7.3485032],[-9.7462436,7.3500131],[-9.7461893,7.3524719],[-9.7458333,7.3531067],[-9.7418903,7.3551969],[-9.741068,7.3553036],[-9.7343942,7.3553417],[-9.7343542,7.3560621],[-9.7333112,7.3558548],[-9.7331207,7.3571091],[-9.7332914,7.3593873],[-9.7339107,7.3601279],[-9.7350268,7.3610838],[-9.73626,7.3614474],[-9.7401987,7.360631],[-9.7410167,7.3607197],[-9.7408186,7.3616529],[-9.7380439,7.3632273],[-9.7366925,7.3635987],[-9.7337239,7.3627978],[-9.7329655,7.362418],[-9.7300089,7.3624492],[-9.7290027,7.3630448],[-9.7272529,7.3674519],[-9.7275458,7.3713438],[-9.7271556,7.3721566],[-9.7266355,7.3723322],[-9.7243206,7.3709844],[-9.7239708,7.3700718],[-9.7236715,7.3668322],[-9.724734,7.3655121],[-9.725079,7.3648825],[-9.7244233,7.3642386],[-9.7224309,7.3645574],[-9.7212903,7.3652819],[-9.7203581,7.3666337],[-9.7200345,7.3674675],[-9.7203602,7.3734826],[-9.720015,7.3756265],[-9.7197789,7.3769691],[-9.7189764,7.3781376],[-9.7180672,7.3805948],[-9.7183223,7.3812979],[-9.7195464,7.3820142],[-9.7222451,7.3804721],[-9.7230797,7.3805181],[-9.724031,7.3841704],[-9.7234824,7.3850278],[-9.7225019,7.385605],[-9.7207912,7.3858438],[-9.7192289,7.3863164],[-9.714993,7.3885298],[-9.7117764,7.3889318],[-9.7096082,7.3887492],[-9.7064864,7.3870212],[-9.7050527,7.3875995],[-9.7025891,7.3935227],[-9.7013981,7.393939],[-9.6991611,7.3941761],[-9.6945302,7.3930846],[-9.6937168,7.3931058],[-9.6913428,7.3941446],[-9.6889759,7.3960633],[-9.6859521,7.3981404],[-9.686569,7.3993292],[-9.6885668,7.4001823],[-9.690874,7.4010217],[-9.6942349,7.401919],[-9.6968978,7.401981],[-9.6980277,7.4024692],[-9.6987176,7.4039149],[-9.6988137,7.4056007],[-9.6995605,7.4075185],[-9.7003303,7.4088005],[-9.7003543,7.4101736],[-9.6991546,7.4109744],[-9.6981627,7.4111064],[-9.6969312,7.410783],[-9.6962391,7.4109941],[-9.6958156,7.4118288],[-9.6958592,7.4133587],[-9.6962334,7.4139078],[-9.6974645,7.4150005],[-9.6982567,7.4162928],[-9.6995539,7.4183011],[-9.700585,7.4189109],[-9.7023456,7.4197605],[-9.7045963,7.4198658],[-9.7057734,7.4194499],[-9.7064399,7.4194447],[-9.7073578,7.4207607],[-9.7074037,7.4218543],[-9.7073364,7.4230383],[-9.7062217,7.4242796],[-9.7068217,7.4269912],[-9.7070096,7.4297997],[-9.7083177,7.4321633],[-9.7096211,7.4370276],[-9.7099304,7.4372414],[-9.7112554,7.4398332],[-9.7167237,7.4431607],[-9.716875,7.4443196],[-9.71379,7.4466082],[-9.7131916,7.4494786],[-9.713223,7.4523538],[-9.712684,7.4525844],[-9.7109183,7.4528476],[-9.7100143,7.453398],[-9.7091047,7.4547184],[-9.7067169,7.4602716],[-9.7057335,7.4617415],[-9.7048659,7.462094],[-9.7035728,7.4623604],[-9.702655,7.4622687],[-9.7018518,7.4628293],[-9.7006698,7.4644136],[-9.6999765,7.4650027],[-9.6972289,7.4650556],[-9.6956639,7.4657501],[-9.6919919,7.4696206],[-9.6870532,7.4719983],[-9.6866762,7.4726224],[-9.6872558,7.4738252],[-9.6880372,7.4744085],[-9.6888588,7.474824],[-9.68929,7.4785533],[-9.6898616,7.4799752],[-9.6896962,7.4812502],[-9.6908324,7.4833113],[-9.6921094,7.4835146],[-9.6928743,7.4836373],[-9.6928567,7.4849794],[-9.6920695,7.4858379],[-9.6900971,7.4879592],[-9.687397,7.4901471],[-9.6847349,7.4918082],[-9.6843986,7.4927447],[-9.6845744,7.4963109],[-9.6851638,7.4977357],[-9.6859135,7.4998211],[-9.6856706,7.5008747],[-9.6847096,7.5012676],[-9.6832309,7.5011699],[-9.6770302,7.5014597],[-9.6756552,7.5021786],[-9.6747115,7.5032492],[-9.6734027,7.5063427],[-9.67288,7.5068335],[-9.6681476,7.5089234],[-9.6603652,7.5036651],[-9.6592254,7.5043785],[-9.658643,7.5039367],[-9.6582735,7.5049741],[-9.6577713,7.5052886],[-9.657844,7.50618],[-9.6584326,7.5133847],[-9.6564895,7.516303],[-9.6537755,7.5176034],[-9.652217,7.5193114],[-9.6480447,7.5203129],[-9.6469121,7.5232728],[-9.6443237,7.5263003],[-9.6417098,7.5282043],[-9.6420815,7.5295267],[-9.6407985,7.5309867],[-9.6366815,7.5333065],[-9.6373656,7.5344985],[-9.6411627,7.5411717],[-9.6521743,7.5605217],[-9.6546862,7.569328],[-9.657069,7.577681],[-9.6635824,7.5915989],[-9.6665841,7.5951084],[-9.6728508,7.6024349],[-9.6818216,7.6129318],[-9.6894373,7.6218428],[-9.7069876,7.6341225],[-9.721285,7.6418725],[-9.737535,7.6522095],[-9.7410665,7.6548338],[-9.7430455,7.6563047],[-9.7446347,7.6574857],[-9.7542766,7.6646501],[-9.7635814,7.6660775],[-9.7661643,7.6664737],[-9.7756465,7.6724699],[-9.7765023,7.673011],[-9.7874405,7.6799268],[-9.8237711,7.6986583],[-9.8367492,7.7053483],[-9.8408917,7.7064335],[-9.8689759,7.713789],[-9.8699156,7.714509],[-9.8698293,7.7149908],[-9.8732888,7.7170939],[-9.9021871,7.739235],[-9.9175833,7.7452061],[-9.9189444,7.7457339],[-9.9239957,7.747693],[-9.9352114,7.7481553],[-9.9354559,7.7486646],[-9.9359318,7.7490779],[-9.9488621,7.7490493],[-9.9516746,7.749043],[-9.9541163,7.7481636],[-9.9552656,7.7477501],[-9.9628352,7.7450243],[-9.9789372,7.739159],[-9.9853949,7.7364156],[-9.9867763,7.7358285],[-9.9915685,7.7337926],[-9.9933328,7.7337596],[-9.9974121,7.7336834],[-10.0093496,7.7334598],[-10.0229939,7.733204],[-10.0232795,7.733811],[-10.023583,7.7338103],[-10.0238953,7.7351198],[-10.0240522,7.7357774],[-10.0252776,7.7409172],[-10.0262583,7.7411416],[-10.0283004,7.747423],[-10.0392424,7.7475496],[-10.0407718,7.7476199],[-10.044152,7.7476116],[-10.0446941,7.7476103],[-10.0452106,7.7421938],[-10.0461471,7.7374631],[-10.0535246,7.7374144],[-10.0900465,7.7371723],[-10.0952705,7.7371375],[-10.0956451,7.7371348],[-10.0961498,7.7384833],[-10.0968101,7.7402469],[-10.0977857,7.7401805],[-10.1095751,7.7409515],[-10.1121071,7.7412762],[-10.1198593,7.7381798],[-10.1500448,7.7345373],[-10.1750395,7.732526],[-10.1760167,7.7340765],[-10.1776258,7.7366287],[-10.1783006,7.7376991],[-10.1689153,7.7487358],[-10.1672459,7.7538144],[-10.1661363,7.7588651],[-10.1647364,7.763968],[-10.168986,7.7743194],[-10.1777629,7.7778579],[-10.1820508,7.7764193],[-10.1845754,7.7755717],[-10.1904329,7.7800891],[-10.190786,7.7901278],[-10.1867666,7.8042264],[-10.1877628,7.8119962],[-10.1857234,7.8155595],[-10.1861622,7.8167848],[-10.1868087,7.8191231],[-10.1942759,7.8184543],[-10.2080718,7.8087021],[-10.2085865,7.8085124],[-10.2140602,7.806493],[-10.2149659,7.8066136],[-10.2244338,7.8037952],[-10.2302451,7.8086467],[-10.2306186,7.8089587],[-10.2375253,7.8176481],[-10.2390929,7.8196206],[-10.2404051,7.824151],[-10.2365442,7.8300305],[-10.2310295,7.8384272],[-10.2312304,7.8386731],[-10.2335701,7.8415376],[-10.2338002,7.8418195],[-10.2386684,7.8408336],[-10.2484003,7.8372428],[-10.2502618,7.8404031],[-10.250685,7.841122],[-10.2539393,7.8433794],[-10.2621519,7.8387975],[-10.2654186,7.8370909],[-10.2657174,7.8369351],[-10.2672652,7.8345684],[-10.2684039,7.8325828],[-10.2786526,7.8234511],[-10.2796442,7.821985],[-10.2848192,7.8171816],[-10.2870696,7.8179767],[-10.2879136,7.8180782],[-10.2884903,7.8175984],[-10.2791729,7.8499391],[-10.2789674,7.8507525],[-10.2818858,7.8524867],[-10.2854744,7.8546185],[-10.2950591,7.8560462],[-10.3034935,7.8531059],[-10.3049208,7.8540103],[-10.3090889,7.8566521],[-10.3116287,7.8582618],[-10.3116358,7.8605096],[-10.311647,7.8640908],[-10.3154696,7.8663165],[-10.317178,7.8673115],[-10.3198191,7.8809043],[-10.3176794,7.8829921],[-10.3140435,7.8865401],[-10.3098317,7.888506],[-10.3092473,7.8887786],[-10.3015876,7.8945083],[-10.2991148,7.906876],[-10.2972919,7.9140134],[-10.2930033,7.9260007],[-10.2973885,7.9261493],[-10.3119805,7.9183315],[-10.3217304,7.9202438],[-10.325147,7.9258805],[-10.3266285,7.9283243],[-10.3227535,7.9354604],[-10.3175906,7.9461637],[-10.3176061,7.951021],[-10.3146982,7.9558875],[-10.3044942,7.9648251],[-10.2964212,7.9800704],[-10.2948387,7.9933526],[-10.2922612,8.0001613],[-10.2931589,8.001169],[-10.299597,8.0083959],[-10.3070627,8.0064291],[-10.3107415,8.0064175],[-10.3151846,8.0064033],[-10.3258058,8.0128267],[-10.3269029,8.0134902],[-10.328771,8.0096538],[-10.3343252,7.9982465],[-10.3366023,7.9992107],[-10.3396708,7.9977714],[-10.3416118,7.9968608],[-10.3463333,7.9946451],[-10.3727801,7.9859768],[-10.3769004,7.9841506],[-10.3935291,7.9774336],[-10.397434,7.975856],[-10.3978737,7.9801968],[-10.3983401,7.9847993],[-10.3987065,7.9884169],[-10.3987786,7.9891282],[-10.4081977,7.9877715],[-10.4143697,7.9887513],[-10.4222721,7.9875984],[-10.4234607,7.9874248],[-10.4308991,7.9848292],[-10.4319297,7.9844521],[-10.4364487,7.9894879],[-10.4377663,7.990937],[-10.4432851,7.9899468],[-10.4444468,7.9894013],[-10.4481495,7.9876629],[-10.4535086,7.9849154],[-10.4633192,7.9798859],[-10.4646862,7.9791853],[-10.471668,7.9786751],[-10.4845915,7.9747502],[-10.488159,7.9732974],[-10.5034534,7.9656085],[-10.5105884,7.9626687],[-10.5258338,7.9571083],[-10.5355706,7.9551294],[-10.5446492,7.9508864],[-10.5446576,7.9531527],[-10.5447475,7.9584574],[-10.5476196,7.9635031],[-10.5486424,7.9591482],[-10.549218,7.9566978],[-10.5521411,7.9566869],[-10.5534148,7.9498823],[-10.5569912,7.9508404],[-10.5605432,7.9453225],[-10.5621696,7.9462342],[-10.5644893,7.9475338],[-10.5664781,7.9430272],[-10.5685147,7.9384113],[-10.5780042,7.9317039],[-10.5930387,7.9237415],[-10.6050223,7.9209161],[-10.6050253,7.9084042],[-10.6050392,7.8426989],[-10.6047956,7.7778348],[-10.6047168,7.7766524],[-10.6043319,7.7746257],[-10.6272423,7.7680712],[-10.6287382,7.7669714],[-10.631533,7.7662556],[-10.6386393,7.7690455],[-10.6396639,7.7691966],[-10.6406842,7.7679784],[-10.6431205,7.7685512],[-10.6449581,7.7692263],[-10.6458047,7.7690422],[-10.6460284,7.7685925],[-10.6457634,7.7675693],[-10.6456946,7.7664559],[-10.6464643,7.7660998],[-10.6474967,7.7666726],[-10.6520237,7.7662431],[-10.6534889,7.7637314],[-10.6534544,7.7620794],[-10.6546819,7.7620082],[-10.6555711,7.7612553],[-10.6574486,7.7615172],[-10.6573551,7.762471],[-10.6569531,7.7632766],[-10.6567419,7.7640912],[-10.6570984,7.7652275],[-10.6579099,7.7650459],[-10.6588075,7.7643956],[-10.6588988,7.7576555],[-10.6601935,7.7554921],[-10.6620594,7.7537343],[-10.6626751,7.7530776],[-10.6629501,7.7524783],[-10.6634541,7.752092],[-10.6640894,7.7518681],[-10.6659958,7.7513165],[-10.6677163,7.751258],[-10.6686402,7.7513132],[-10.6696189,7.7515635],[-10.6706701,7.7513031],[-10.6712617,7.7507983],[-10.6707285,7.7502036],[-10.6696719,7.7501199],[-10.6695313,7.7495382],[-10.6696189,7.7488727],[-10.6714853,7.747802],[-10.67324,7.7490882],[-10.6744076,7.7486123],[-10.6755464,7.7473104],[-10.6772416,7.7463329],[-10.6791522,7.7494348],[-10.6799847,7.7501458],[-10.6810436,7.7495552],[-10.6818121,7.7461303],[-10.6871307,7.7421986],[-10.6885212,7.7432007],[-10.6897958,7.744012],[-10.692796,7.7426568],[-10.6919858,7.7409161],[-10.6918039,7.7388942],[-10.69263,7.7383015],[-10.6931941,7.7395589],[-10.696632,7.7403878],[-10.6970373,7.7398166],[-10.6962197,7.7388908],[-10.6964241,7.737907],[-10.6957172,7.7355025],[-10.6970373,7.7352741],[-10.6982063,7.7352853],[-10.6992328,7.7368126],[-10.7007748,7.7364314],[-10.7016442,7.7360223],[-10.7022181,7.734996],[-10.7042653,7.7313348],[-10.7084661,7.7285024],[-10.7074201,7.7259769],[-10.707479,7.7205755],[-10.7089253,7.7196811],[-10.7098243,7.718816],[-10.7105564,7.7173672],[-10.7103697,7.7162189],[-10.709957,7.7145809],[-10.7101734,7.713473],[-10.7106517,7.7127883],[-10.7115138,7.7121961],[-10.7124346,7.7119778],[-10.713251,7.7119896],[-10.7146329,7.7122916],[-10.7154285,7.712372],[-10.7158973,7.7115659],[-10.7159538,7.7109251],[-10.7156498,7.7095148],[-10.7155347,7.7084074],[-10.7159229,7.7078046],[-10.7184232,7.7070879],[-10.7196837,7.7063687],[-10.7202632,7.7057109],[-10.7202086,7.705363],[-10.7192914,7.7053204],[-10.7186804,7.7052819],[-10.718325,7.7049194],[-10.7182196,7.704254],[-10.7188708,7.7035897],[-10.7193952,7.7027823],[-10.7208808,7.7015001],[-10.7223744,7.6999804],[-10.7230426,7.6994581],[-10.7239904,7.6990069],[-10.7247621,7.6985598],[-10.7252391,7.6981442],[-10.7256597,7.6975664],[-10.7261576,7.6969041],[-10.7264402,7.6964321],[-10.7265862,7.6962287],[-10.7268445,7.6957406],[-10.72669,7.6950441],[-10.7267539,7.6945718],[-10.7270175,7.6940521],[-10.7272145,7.6934452],[-10.7273583,7.6926168],[-10.7272092,7.6919123],[-10.7269643,7.6910892],[-10.7268413,7.6905462],[-10.7271394,7.6881982],[-10.7287524,7.6868295],[-10.7297153,7.6871956],[-10.7302134,7.6878302],[-10.731063,7.6879365],[-10.734441,7.6820062],[-10.7372394,7.6834447],[-10.7378043,7.683419],[-10.7386859,7.6827723],[-10.7396603,7.6819702],[-10.7414015,7.6806563],[-10.7426081,7.6794966],[-10.7430628,7.678651],[-10.7435207,7.6774373],[-10.7441765,7.6755251],[-10.7450436,7.6745034],[-10.7461618,7.6738754],[-10.7468572,7.6728863],[-10.7474716,7.6719335],[-10.7479668,7.6707936],[-10.7488086,7.6692976],[-10.7496547,7.6690311],[-10.7508368,7.6680812],[-10.7514889,7.6673166],[-10.7508904,7.6664129],[-10.7498464,7.6663028],[-10.7489093,7.6660443],[-10.7484568,7.665441],[-10.7489146,7.6649836],[-10.7486039,7.6640962],[-10.7481532,7.6635429],[-10.7476206,7.6628793],[-10.7476314,7.6619862],[-10.7478177,7.6616062],[-10.7487079,7.6613945],[-10.7512681,7.661469],[-10.7530637,7.6612938],[-10.7542445,7.6605047],[-10.7553096,7.6599597],[-10.7566993,7.6595112],[-10.7589357,7.658651],[-10.7605172,7.657964],[-10.7612945,7.6577539],[-10.7619654,7.6570731],[-10.7622488,7.6561378],[-10.7625351,7.6553897],[-10.7631049,7.6545981],[-10.7639462,7.6538857],[-10.765288,7.6524028],[-10.7665068,7.6515315],[-10.7669333,7.6510782],[-10.7670558,7.6500069],[-10.767141,7.6485715],[-10.7674142,7.6479365],[-10.7680994,7.647363],[-10.768962,7.6469724],[-10.7695466,7.6471507],[-10.770389,7.6479118],[-10.7712025,7.6490685],[-10.7711771,7.64959],[-10.7710333,7.6502919],[-10.771118,7.651625],[-10.7714912,7.6525136],[-10.7721577,7.653135],[-10.7723979,7.6532513],[-10.7726243,7.6533608],[-10.7729342,7.6535585],[-10.7737276,7.6536218],[-10.7748032,7.6536693],[-10.7753958,7.6535123],[-10.7757616,7.6528988],[-10.7756498,7.6518803],[-10.7751972,7.6503763],[-10.7747337,7.6497746],[-10.7737783,7.6492504],[-10.7731738,7.6485029],[-10.7728032,7.6480171],[-10.773472,7.6472627],[-10.7743027,7.6462072],[-10.7752786,7.6443955],[-10.7754901,7.6435791],[-10.7753144,7.6426292],[-10.7750588,7.6416318],[-10.7752558,7.641009],[-10.7755699,7.6392569],[-10.7755859,7.638782],[-10.7754049,7.6380431],[-10.7754636,7.6376607],[-10.7757939,7.637425],[-10.7761557,7.6371618],[-10.7762462,7.636101],[-10.7765327,7.635631],[-10.7770076,7.6353991],[-10.7777435,7.6353279],[-10.7783601,7.6351933],[-10.7790257,7.6345758],[-10.7799362,7.6334623],[-10.7808627,7.6326496],[-10.7819329,7.6312352],[-10.7823873,7.6303519],[-10.782689,7.6294039],[-10.783147,7.6289078],[-10.7837327,7.6288709],[-10.7841267,7.6282006],[-10.7848296,7.6269287],[-10.7857454,7.6257096],[-10.7869648,7.624443],[-10.7909836,7.6206907],[-10.7914481,7.6199042],[-10.7911553,7.6188698],[-10.7903566,7.6176718],[-10.7893023,7.6168326],[-10.7889828,7.6162362],[-10.7891638,7.6158721],[-10.7896058,7.6154657],[-10.7899597,7.6149221],[-10.7904708,7.6140988],[-10.7906678,7.6127741],[-10.7910406,7.6120088],[-10.7915517,7.6112118],[-10.7921428,7.6104782],[-10.7926965,7.6099293],[-10.7930799,7.6092116],[-10.7932503,7.6087313],[-10.7932077,7.6084146],[-10.792393,7.6084305],[-10.791983,7.6088791],[-10.791408,7.6094596],[-10.7909501,7.6095863],[-10.7904655,7.6095177],[-10.7903324,7.6093066],[-10.7902791,7.6078288],[-10.7903537,7.6062771],[-10.7900768,7.6045301],[-10.7898372,7.6030471],[-10.7894804,7.6024084],[-10.7892142,7.6020126],[-10.7892615,7.6017705],[-10.78931,7.6015218],[-10.7897426,7.6013936],[-10.7904389,7.6014954],[-10.7910246,7.6018015],[-10.7919937,7.6021868],[-10.7925847,7.6021921],[-10.7930799,7.6015482],[-10.7937957,7.6005683],[-10.7940172,7.5993222],[-10.7944856,7.5967769],[-10.795492,7.5948188],[-10.7963759,7.5938213],[-10.7973668,7.5929107],[-10.7984791,7.5917892],[-10.7998902,7.5913195],[-10.8005918,7.5914797],[-10.8017165,7.5920795],[-10.802675,7.5917787],[-10.8036505,7.5917247],[-10.8048581,7.5927023],[-10.807169,7.5925018],[-10.8099678,7.5927783],[-10.8113702,7.5931773],[-10.8129623,7.5942224],[-10.8144337,7.5951368],[-10.815811,7.5956474],[-10.816599,7.5959377],[-10.8173604,7.5958902],[-10.8178394,7.595774],[-10.8180686,7.5953677],[-10.8179888,7.5948557],[-10.8177358,7.5946284],[-10.8168972,7.5945074],[-10.8165549,7.5942805],[-10.8158589,7.5933568],[-10.8148525,7.5923645],[-10.8139765,7.5914083],[-10.813745,7.5910186],[-10.8136598,7.5906228],[-10.8137876,7.5902956],[-10.8142242,7.5897255],[-10.8149537,7.5891977],[-10.8165511,7.5873557],[-10.8217806,7.581553],[-10.822305,7.5802926],[-10.8221467,7.5795622],[-10.8207855,7.5796842],[-10.8194317,7.5790506],[-10.8189642,7.578577],[-10.8187222,7.5780969],[-10.8202595,7.5749441],[-10.8238934,7.5728864],[-10.8248234,7.5724954],[-10.8254677,7.5716351],[-10.8259469,7.5709964],[-10.8260694,7.5702627],[-10.8256646,7.5698182],[-10.8251802,7.5698088],[-10.8249417,7.5695931],[-10.8251109,7.5691807],[-10.8258191,7.5665785],[-10.826096,7.565412],[-10.8264528,7.5638021],[-10.8267599,7.5629219],[-10.8277094,7.5627306],[-10.8282844,7.5622977],[-10.8291197,7.5617947],[-10.8297594,7.5616168],[-10.8305528,7.5628308],[-10.8310674,7.5633314],[-10.8321555,7.5640343],[-10.8331885,7.5641979],[-10.8336273,7.5639893],[-10.8350202,7.563042],[-10.8359573,7.5618596],[-10.8367187,7.5609834],[-10.8369676,7.5602249],[-10.8371741,7.5588637],[-10.8375015,7.5579906],[-10.8376694,7.5570553],[-10.8378976,7.5560216],[-10.838259,7.5555931],[-10.8385497,7.5552489],[-10.8394716,7.5549291],[-10.8403022,7.5548235],[-10.8415269,7.5545754],[-10.8424959,7.554217],[-10.8428847,7.553752],[-10.8431722,7.5530763],[-10.8431296,7.5523848],[-10.8430231,7.5518676],[-10.8430322,7.5507803],[-10.8431846,7.5499189],[-10.8437728,7.5491458],[-10.8444076,7.5487374],[-10.8450731,7.5483046],[-10.8463366,7.547965],[-10.8469597,7.5476947],[-10.8482931,7.5468596],[-10.8493009,7.545565],[-10.8499985,7.5450371],[-10.8508746,7.5443297],[-10.8518089,7.543575],[-10.8534382,7.5427304],[-10.8186396,7.5186385],[-10.8076027,7.518947],[-10.8005615,7.5191251],[-10.7914467,7.5201966],[-10.7676142,7.5233974],[-10.7526586,7.5257551],[-10.7461912,7.5230125],[-10.7458083,7.5228501],[-10.740874,7.520758],[-10.7321961,7.5214111],[-10.7296356,7.5211404],[-10.7207647,7.5214143],[-10.7106717,7.5210808],[-10.714219,7.5154509],[-10.7150531,7.5144163],[-10.7173623,7.509883],[-10.7194499,7.5057845],[-10.719073,7.5057916],[-10.679627,7.5065065],[-10.6770514,7.5071877],[-10.6730908,7.5082347],[-10.6714038,7.5084514],[-10.670865,7.5084122],[-10.6705249,7.5088825],[-10.666852,7.5133689],[-10.6659057,7.5152758],[-10.6656823,7.515726],[-10.6626662,7.5218029],[-10.6625575,7.522022],[-10.656224,7.5220663],[-10.6532074,7.5219771],[-10.6385668,7.5220219],[-10.6368745,7.5216061],[-10.6336817,7.5208223],[-10.6286148,7.5175362],[-10.6251987,7.5139789],[-10.6217907,7.5104294],[-10.6174171,7.5060968],[-10.615697,7.5013557],[-10.6150677,7.5003147],[-10.6135506,7.4995728],[-10.6126859,7.4967486],[-10.613434,7.4925617],[-10.6139666,7.4858436],[-10.6149842,7.4838714],[-10.6149271,7.4818197],[-10.6160357,7.474467],[-10.6158993,7.4700384],[-10.6149856,7.4681739],[-10.6146524,7.4649104],[-10.6134109,7.4628317],[-10.6138235,7.4612202],[-10.6148187,7.4606491],[-10.6166929,7.4603693],[-10.6178301,7.4590855],[-10.6186263,7.4575875],[-10.6189536,7.4554342],[-10.620028,7.4546479],[-10.6214474,7.4546191],[-10.6223982,7.4542104],[-10.6222805,7.4536792],[-10.6218356,7.4517802],[-10.6212961,7.4472594],[-10.6242537,7.4413004],[-10.6251018,7.4395917],[-10.6305414,7.430833],[-10.6328977,7.427039],[-10.6380037,7.4176271],[-10.6398968,7.4111843],[-10.6355141,7.4040684],[-10.6328746,7.3971201],[-10.6319797,7.3906875],[-10.6331728,7.3842044],[-10.6340298,7.3795474],[-10.6343304,7.3665],[-10.6319059,7.3614045],[-10.6315211,7.3605961],[-10.6257623,7.3581818],[-10.6218439,7.3580513],[-10.6163523,7.3578677],[-10.6065969,7.358425],[-10.6029463,7.3574112],[-10.6026491,7.3573286],[-10.5997948,7.3565358],[-10.590194,7.3515254],[-10.5797218,7.3465178],[-10.5710914,7.3429876],[-10.5696016,7.3423785],[-10.5617603,7.3422318],[-10.553932,7.3457381],[-10.5529865,7.3461127],[-10.5531329,7.3453181],[-10.5500885,7.3472609],[-10.5457466,7.347845],[-10.5420915,7.3480402],[-10.5325132,7.349465],[-10.5260901,7.3515503],[-10.5154603,7.3531759],[-10.5158238,7.3516407],[-10.5159411,7.3498743],[-10.5157277,7.3488027],[-10.5153719,7.3474287],[-10.5160127,7.3456592],[-10.5163869,7.3453501],[-10.5165409,7.3448776],[-10.5171684,7.3386105],[-10.5169163,7.3367107],[-10.5173101,7.3354457],[-10.517374,7.3348094],[-10.516964,7.3339958],[-10.5164176,7.3328276],[-10.5166043,7.3315473],[-10.5160763,7.3303692],[-10.5152001,7.328845],[-10.5146662,7.3266168],[-10.5145415,7.3246908],[-10.515095,7.3230896],[-10.5149023,7.3214212],[-10.5150461,7.3198823],[-10.5158336,7.3190621],[-10.516345,7.3180677],[-10.51628,7.317181],[-10.5164388,7.3162654],[-10.5177243,7.3150427],[-10.5182256,7.3142063],[-10.5187968,7.3125369],[-10.5194432,7.3116314],[-10.5205967,7.3109435],[-10.5210069,7.3103227],[-10.520974,7.309552],[-10.5402442,7.2971272],[-10.5459328,7.2869078],[-10.5556666,7.2840238],[-10.5745655,7.2724874],[-10.5796852,7.2714216],[-10.5969407,7.2606373],[-10.5980784,7.2564364],[-10.619948,7.2413254],[-10.6286705,7.2334248],[-10.6318941,7.2332367],[-10.6526891,7.2157419],[-10.6555966,7.2148641],[-10.6637503,7.2079036],[-10.666405,7.2074019],[-10.6717776,7.2021972],[-10.6754436,7.2021972],[-10.6781615,7.1979957],[-10.6805186,7.1959577],[-10.682004,7.1974314],[-10.6855436,7.1970237],[-10.6880226,7.1946948],[-10.694093,7.1913221],[-10.6975734,7.1903986],[-10.7005277,7.1877486],[-10.7046475,7.1887559],[-10.7103422,7.1871801],[-10.7141343,7.1834927],[-10.7161578,7.1804411],[-10.7173112,7.1793871],[-10.7213562,7.1785651],[-10.7239889,7.1764641],[-10.7265314,7.1749622],[-10.7304367,7.172292],[-10.7331279,7.1700635],[-10.7361071,7.1642713],[-10.7378372,7.1628558],[-10.7416514,7.1584288],[-10.7466338,7.154952],[-10.7474995,7.1541996],[-10.7487758,7.1514387],[-10.7507756,7.1479897],[-10.7522628,7.1465742],[-10.7543776,7.1435532],[-10.7566611,7.1407231],[-10.7606274,7.1356188],[-10.7636772,7.1315197],[-10.7712709,7.1242482],[-10.7753128,7.1217171],[-10.7775737,7.1231482],[-10.7827716,7.1227728],[-10.7863863,7.1224113],[-10.788586,7.1212574],[-10.7911919,7.1180043],[-10.7929993,7.1167113],[-10.7956613,7.1142506],[-10.8012195,7.1149926],[-10.808085,7.1156513],[-10.8130285,7.1145699],[-10.815743,7.1121712],[-10.8155845,7.1107851],[-10.8146136,7.1100871],[-10.8149802,7.1092122],[-10.816889,7.1088003],[-10.8191447,7.1072293],[-10.8217646,7.1069374],[-10.8228855,7.1060615],[-10.8268784,7.1049771],[-10.8315579,7.1032114],[-10.8333437,7.101331],[-10.8341804,7.0995989],[-10.8348103,7.0996704],[-10.835656,7.0989293],[-10.8360024,7.097916],[-10.8363983,7.0967463],[-10.8361643,7.096291],[-10.835764,7.0962196],[-10.8356515,7.0950366],[-10.8350622,7.094416],[-10.8348367,7.093887],[-10.8342121,7.0925644],[-10.8318773,7.092356],[-10.8314192,7.0916868],[-10.8321508,7.0914974],[-10.8326015,7.0902141],[-10.8344419,7.0893843],[-10.8356888,7.0891949],[-10.8399005,7.0867452],[-10.8440231,7.0841441],[-10.8474713,7.0816945],[-10.8508305,7.0798509],[-10.8552473,7.0806503],[-10.8587327,7.0787699],[-10.8623215,7.0776971],[-10.8667945,7.0762099],[-10.868868,7.0753413],[-10.8727719,7.0745509],[-10.8747524,7.0729784],[-10.8780549,7.0677543],[-10.8793268,7.0673466],[-10.8808455,7.0664626],[-10.8838189,7.0651093],[-10.8866334,7.0643999],[-10.8889025,7.0634689],[-10.8902069,7.061448],[-10.8917117,7.0592363],[-10.8938684,7.0583918],[-10.8951065,7.0574731],[-10.897199,7.0552555],[-10.8989391,7.05311],[-10.8993273,7.0521695],[-10.8997574,7.0507832],[-10.9015519,7.0494538],[-10.9032369,7.0481745],[-10.9056127,7.0463936],[-10.9082412,7.0452648],[-10.909328,7.0437096],[-10.9103521,7.0416102],[-10.9116195,7.0383293],[-10.9121526,7.0369493],[-10.9123548,7.034767],[-10.9141745,7.0330529],[-10.9148401,7.0320029],[-10.9150423,7.0295578],[-10.9151013,7.0277182],[-10.9155983,7.02628],[-10.9161038,7.0255776],[-10.9172496,7.0251428],[-10.917991,7.0246328],[-10.9180837,7.0239388],[-10.9183701,7.020845],[-10.9186888,7.0197651],[-10.9188587,7.0191893],[-10.9203733,7.0166322],[-10.9218418,7.0152632],[-10.9233459,7.0145133],[-10.9249868,7.0169256],[-10.9275731,7.0204327],[-10.9350055,7.0201702],[-10.9397808,7.0177411],[-10.9426762,7.0196246],[-10.9493083,7.0172639],[-10.9503273,7.0155143],[-10.9508988,7.0114631],[-10.9514503,7.0109586],[-10.9528194,7.009606],[-10.9556199,7.0104718],[-10.9575079,7.0101299],[-10.9594468,7.0097374],[-10.9596255,7.0093703],[-10.9586305,7.0087119],[-10.9577886,7.0083194],[-10.955824,7.0071165],[-10.9524595,7.0058196],[-10.9511424,7.0047742],[-10.9499433,7.0034448],[-10.9489068,7.0021623],[-10.9467923,7.0018908],[-10.944624,7.0012602],[-10.9426974,7.0003714],[-10.9398633,6.9968894],[-10.9397838,6.9939629],[-10.9401512,6.9911025],[-10.9394204,6.9901784],[-10.9387235,6.9893941]]]]}]}
