# Supplementary material
Source: ML conference proceedings conference paper supplement (https://proceedings.neurips.cc/paper_files/paper/2022/hash/9d3faa41886997cfc2128b930077fa49-Abstract.html)
Supplement: Supplementary file 1 [file 9d3faa41886997cfc2128b930077fa49-Supplemental-Conference.zip › code/ebola/map/geojson/grand_bassa.geojson]

{"type":"GeometryCollection","geometries":[{"type":"MultiPolygon","coordinates":[[[[-9.4819599,6.9907796],[-9.4819237,6.9902631],[-9.4822823,6.989541],[-9.4824075,6.9890878],[-9.4825672,6.9885659],[-9.482787,6.9881326],[-9.482454,6.9879777],[-9.4820113,6.9877733],[-9.4818099,6.9876257],[-9.4815036,6.9874667],[-9.4812358,6.9873163],[-9.481081,6.9871335],[-9.480749,6.986927],[-9.4802931,6.9867464],[-9.4800021,6.9865981],[-9.4797103,6.9864405],[-9.4792072,6.9862082],[-9.4787357,6.9858964],[-9.4785866,6.9858517],[-9.4784293,6.9858786],[-9.4781262,6.9861021],[-9.4778595,6.9863623],[-9.4775549,6.9866851],[-9.4772801,6.9870327],[-9.4770479,6.9873427],[-9.4768384,6.9876852],[-9.4765034,6.9882798],[-9.4762915,6.9886472],[-9.476159,6.9888513],[-9.4759107,6.9891184],[-9.4756283,6.9893476],[-9.4751945,6.9897174],[-9.4747814,6.9901288],[-9.4741828,6.9907421],[-9.4738566,6.9911789],[-9.4736273,6.991483],[-9.4733438,6.9917567],[-9.4730784,6.9919933],[-9.4728487,6.9923346],[-9.4723159,6.9932556],[-9.4729937,6.993768],[-9.4730849,6.9938425],[-9.4731096,6.9939246],[-9.4730924,6.994029],[-9.4730098,6.994564],[-9.4730094,6.9946525],[-9.4730286,6.9947424],[-9.4731103,6.9949273],[-9.4733677,6.9953753],[-9.4736106,6.9953201],[-9.473885,6.9951089],[-9.4741609,6.9946848],[-9.4747492,6.994425],[-9.4757153,6.9938777],[-9.4763464,6.993488],[-9.4769178,6.9929674],[-9.4778539,6.9922585],[-9.4788668,6.9916973],[-9.4800472,6.9913557],[-9.4808331,6.9911044],[-9.4811515,6.9910245],[-9.4819599,6.9907796]]]]}]}
