# Supplementary material
Source: ML conference proceedings conference paper supplement (https://proceedings.neurips.cc/paper_files/paper/2022/hash/9d3faa41886997cfc2128b930077fa49-Abstract.html)
Supplement: Supplementary file 1 [file 9d3faa41886997cfc2128b930077fa49-Supplemental-Conference.zip › code/ebola/map/geojson/grand_gedeh.geojson]

{"type":"GeometryCollection","geometries":[{"type":"MultiPolygon","coordinates":[[[[-9.0936115,5.8289076],[-9.0923683,5.8290248],[-9.0891381,5.8302944],[-9.087341,5.8297849],[-9.0854794,5.8288591],[-9.0848504,5.8288033],[-9.0835715,5.8291562],[-9.0821398,5.8298545],[-9.0804845,5.8341358],[-9.079417,5.8355961],[-9.0758374,5.838102],[-9.0733288,5.8400065],[-9.071939,5.8418499],[-9.0705951,5.8428527],[-9.069559,5.842784],[-9.0689489,5.8418399],[-9.0651085,5.8348577],[-9.063386,5.8307712],[-9.062399,5.8275639],[-9.0613063,5.8270523],[-9.0599401,5.8271817],[-9.057497,5.8284956],[-9.0552317,5.8292909],[-9.0528895,5.828958],[-9.0512831,5.8276263],[-9.0501507,5.8255719],[-9.0493573,5.8226118],[-9.0486384,5.8215717],[-9.0452755,5.8189475],[-9.0437064,5.8183622],[-9.0424029,5.8185567],[-9.0387597,5.8202702],[-9.0370844,5.8202702],[-9.0351017,5.8194811],[-9.0332746,5.8196758],[-9.0322283,5.8204566],[-9.0299747,5.8224349],[-9.0276463,5.8235599],[-9.0251267,5.8240216],[-9.0233492,5.8244801],[-9.0211606,5.8258656],[-9.0195755,5.8259313],[-9.01787,5.8273016],[-9.0164212,5.8288084],[-9.0148381,5.8318273],[-9.0135753,5.8355297],[-9.0116959,5.8364645],[-9.0097575,5.836664],[-9.0080846,5.8361314],[-9.0062837,5.834738],[-9.0047315,5.8322069],[-9.0033842,5.8310053],[-9.0005246,5.8294663],[-8.9988167,5.8284113],[-8.9978864,5.8270131],[-8.9966808,5.8241839],[-8.9955254,5.8229996],[-8.9944953,5.8222938],[-8.9925483,5.8221758],[-8.9913309,5.822644],[-8.9906976,5.8235891],[-8.9894261,5.8240277],[-8.9876754,5.8240234],[-8.9858271,5.8245335],[-8.9844085,5.8260581],[-8.9835767,5.8272661],[-8.9839836,5.828295],[-8.9838311,5.8293238],[-8.9821819,5.8307622],[-8.9798749,5.8333591],[-8.9793676,5.8360926],[-8.9786622,5.8366986],[-8.9774608,5.8369264],[-8.9760789,5.8368191],[-8.9734981,5.8365268],[-8.9692907,5.8371456],[-8.9680301,5.8370999],[-8.9665738,5.8366492],[-8.9640989,5.8358083],[-8.9623243,5.8345368],[-8.9613688,5.8344242],[-8.9604981,5.8344171],[-8.9587144,5.8350298],[-8.9565201,5.8349875],[-8.955161,5.8340862],[-8.9538444,5.8335228],[-8.9525703,5.8329172],[-8.9509635,5.8329524],[-8.9499018,5.8329172],[-8.9487834,5.833727],[-8.9477075,5.8345861],[-8.945683,5.8351847],[-8.9383357,5.8353678],[-8.9382861,5.8337834],[-8.9382507,5.8332412],[-8.9394541,5.8314173],[-8.9416767,5.8285232],[-8.9425402,5.8268613],[-8.9427634,5.8230974],[-8.9424411,5.8230446],[-8.9418466,5.8229601],[-8.9409759,5.8231573],[-8.9387958,5.8245375],[-8.936743,5.8250515],[-8.9354831,5.8257346],[-8.9333737,5.8277345],[-8.9298699,5.828333],[-8.9267342,5.8283049],[-8.9261578,5.8293809],[-8.9254534,5.8306226],[-8.9265289,5.8339805],[-8.926813,5.8352078],[-8.9262529,5.8381351],[-8.9255309,5.8403744],[-8.9251345,5.8414377],[-8.9239736,5.8420925],[-8.9225933,5.8423813],[-8.9211635,5.8420362],[-8.9208888,5.841982],[-8.9203495,5.8416137],[-8.919769,5.8416067],[-8.9192523,5.8421418],[-8.9190683,5.8432615],[-8.9196275,5.8443811],[-8.9199801,5.8455024],[-8.9200026,5.8470498],[-8.918594,5.848261],[-8.917235,5.8489018],[-8.9162936,5.849782],[-8.9169868,5.8543804],[-8.9167485,5.8557552],[-8.9162228,5.8574994],[-8.9142904,5.8580275],[-8.9125137,5.8570417],[-8.9118879,5.8555715],[-8.9105884,5.8543026],[-8.9097885,5.8539998],[-8.9087092,5.8541886],[-8.9067023,5.855387],[-8.9056052,5.8558799],[-8.9052725,5.8571544],[-8.9063413,5.8590275],[-8.9079198,5.8608159],[-8.9085642,5.8619271],[-8.9083304,5.8635198],[-8.9070423,5.8653401],[-8.9048761,5.8666321],[-8.9033472,5.8672869],[-8.9023341,5.8690059],[-8.9001186,5.8725547],[-8.8986887,5.874477],[-8.8966785,5.875681],[-8.8934436,5.8771738],[-8.8920917,5.878075],[-8.89149,5.8790326],[-8.8909591,5.8801663],[-8.8920421,5.8813914],[-8.8966148,5.8824898],[-8.900366,5.8834307],[-8.9045017,5.8838952],[-8.9063509,5.8847124],[-8.9076941,5.8855544],[-8.9086954,5.8863722],[-8.9087901,5.8879274],[-8.9081664,5.8905492],[-8.9076004,5.8925515],[-8.907473,5.8960016],[-8.9073822,5.8976216],[-8.9069738,5.8994638],[-8.9061357,5.9002634],[-8.9050628,5.9008184],[-8.9028634,5.9011812],[-8.9013721,5.9015547],[-8.9003946,5.9020638],[-8.8998271,5.9026859],[-8.899355,5.9035077],[-8.8987581,5.9063194],[-8.8959189,5.9133334],[-8.8957338,5.9142484],[-8.8963208,5.9159887],[-8.8977153,5.9168125],[-8.8995427,5.9160257],[-8.9011038,5.9151773],[-8.9029653,5.913822],[-8.9036466,5.9134432],[-8.9042474,5.9132084],[-8.9051217,5.9129469],[-8.9063609,5.9128936],[-8.9094722,5.9130751],[-8.9116019,5.9129096],[-8.9143002,5.9126642],[-8.9155877,5.9129843],[-8.9175832,5.9135285],[-8.9181197,5.9139341],[-8.9182591,5.9147398],[-8.9178944,5.9158337],[-8.9175832,5.9168902],[-8.9170522,5.9186937],[-8.9167893,5.9188858],[-8.916328,5.9189285],[-8.9160866,5.9188591],[-8.9157915,5.9186723],[-8.9153034,5.9181602],[-8.9140588,5.917125],[-8.9133078,5.9167088],[-8.9121705,5.9162392],[-8.9108455,5.9162019],[-8.9096707,5.916402],[-8.9088848,5.9165781],[-8.9078468,5.9171249],[-8.9069483,5.9178854],[-8.9064199,5.9186377],[-8.9062965,5.9196088],[-8.9064816,5.9202518],[-8.90679,5.9208973],[-8.9072889,5.9217752],[-8.908107,5.9223033],[-8.909727,5.9228765],[-8.9154235,5.9247803],[-8.9168397,5.9253947],[-8.9177093,5.925715],[-8.9191915,5.9267448],[-8.9211425,5.9266541],[-8.9232239,5.9262059],[-8.9251122,5.9247334],[-8.9279545,5.9217748],[-8.9289557,5.9181783],[-8.9291391,5.9142169],[-8.9291488,5.9096196],[-8.9296612,5.9085124],[-8.9313349,5.9067622],[-8.9330301,5.9048413],[-8.9340815,5.9044998],[-8.9364633,5.9045424],[-8.9373001,5.9046705],[-8.93798,5.9048301],[-8.9384374,5.9068049],[-8.9411726,5.9105754],[-8.9414415,5.9117566],[-8.9407789,5.9144005],[-8.9383086,5.9195043],[-8.9371007,5.9219457],[-8.937333,5.9251886],[-8.9373984,5.9259043],[-8.9373064,5.9267364],[-8.9387984,5.9281682],[-8.9414292,5.9290237],[-8.9436584,5.9279889],[-8.9450742,5.9279411],[-8.9467409,5.9288282],[-8.9469314,5.9296715],[-8.9474734,5.9308114],[-8.9473972,5.9321773],[-8.9470496,5.9335518],[-8.945714,5.9358669],[-8.9439157,5.9373695],[-8.9436519,5.9380729],[-8.9442513,5.938681],[-8.9449827,5.938538],[-8.9476238,5.9363101],[-8.9479918,5.9362008],[-8.9487408,5.9373284],[-8.9483961,5.9385256],[-8.9474314,5.939678],[-8.9461665,5.9408444],[-8.941182,5.9445712],[-8.9375446,5.9471192],[-8.9361023,5.9484163],[-8.934626,5.9490701],[-8.9329356,5.9530601],[-8.9318782,5.9550495],[-8.928444,5.9584603],[-8.9263731,5.9599765],[-8.9262208,5.9604135],[-8.9274744,5.9623487],[-8.9279997,5.9641072],[-8.928014,5.9657512],[-8.9252408,5.9697658],[-8.924292,5.9718146],[-8.9231426,5.9744579],[-8.9217996,5.9758476],[-8.9204049,5.9768719],[-8.9183879,5.9769146],[-8.916285,5.9753781],[-8.9149976,5.9747805],[-8.9140427,5.9749913],[-8.9136672,5.9757622],[-8.9136057,5.9759996],[-8.9134027,5.9765688],[-8.9139891,5.9783231],[-8.9152765,5.9800304],[-8.9156537,5.9803938],[-8.9176369,5.9817377],[-8.9201903,5.9819938],[-8.9217245,5.9811375],[-8.9224005,5.980756],[-8.9230471,5.9815153],[-8.9253916,5.9844849],[-8.9260822,5.9856747],[-8.926413,5.986582],[-8.9256406,5.9876064],[-8.9261126,5.9884173],[-8.9296361,5.9905052],[-8.936621,5.9955503],[-8.9370704,5.9964229],[-8.9383409,5.9995083],[-8.9400233,6.0031886],[-8.9399782,6.0050093],[-8.9405197,6.0054007],[-8.9426428,6.0054889],[-8.9462421,6.004469],[-8.9477023,6.0048668],[-8.9503322,6.0068206],[-8.9504982,6.0077281],[-8.9500807,6.0089519],[-8.9488042,6.0099081],[-8.9466638,6.0108046],[-8.9446546,6.0122452],[-8.9397848,6.0144348],[-8.9394038,6.0148365],[-8.9385514,6.0152793],[-8.9373011,6.0150402],[-8.9361654,6.0136284],[-8.9336465,6.0099636],[-8.9324547,6.0093156],[-8.9304941,6.0094277],[-8.9292689,6.0097352],[-8.9286424,6.0106841],[-8.9284407,6.0136003],[-8.9286265,6.015725],[-8.929412,6.0171495],[-8.931621,6.018548],[-8.9318971,6.0191302],[-8.9316693,6.0197612],[-8.9308223,6.0201869],[-8.9293079,6.0206344],[-8.9281747,6.0206593],[-8.9260265,6.0196919],[-8.9247508,6.0188475],[-8.9228219,6.018691],[-8.9212663,6.0188859],[-8.9187157,6.0206459],[-8.9167379,6.019378],[-8.9131569,6.0186913],[-8.9112901,6.0187092],[-8.9099768,6.0188213],[-8.9092698,6.019284],[-8.9087191,6.0203474],[-8.9085276,6.0222049],[-8.9079143,6.0230142],[-8.9069532,6.0232475],[-8.9034155,6.0223741],[-8.8990362,6.0225726],[-8.8976858,6.0230114],[-8.8966172,6.0237702],[-8.8960428,6.0250124],[-8.8948885,6.0263939],[-8.8930489,6.0269959],[-8.8910132,6.0278749],[-8.888092,6.0274661],[-8.8860956,6.0275928],[-8.8836385,6.0282517],[-8.877315,6.0303579],[-8.8748671,6.0306868],[-8.8715576,6.0323324],[-8.8690249,6.0325976],[-8.8661732,6.031872],[-8.8644014,6.0316111],[-8.8629667,6.0321299],[-8.8621169,6.0329099],[-8.8610546,6.0342964],[-8.8553626,6.0375873],[-8.8539221,6.0393454],[-8.8535262,6.0442032],[-8.8528625,6.0471734],[-8.8507452,6.0517133],[-8.8505933,6.0541863],[-8.8500751,6.0566008],[-8.8498981,6.0581147],[-8.8494668,6.0605778],[-8.848685,6.0620494],[-8.8481583,6.0633765],[-8.8470673,6.0646998],[-8.8476887,6.0668049],[-8.8470114,6.0691319],[-8.8458144,6.0717812],[-8.8441158,6.0735355],[-8.843996,6.0763437],[-8.8434263,6.0797423],[-8.844207,6.0819101],[-8.8440574,6.0882561],[-8.8451644,6.0905539],[-8.8458446,6.0945768],[-8.8444185,6.0978137],[-8.8431822,6.0988598],[-8.8415649,6.0991948],[-8.8396349,6.0987978],[-8.8357415,6.0978791],[-8.8347321,6.0981301],[-8.8347321,6.0989996],[-8.8352539,6.0999074],[-8.838502,6.1045252],[-8.8396292,6.1066269],[-8.8410327,6.1120694],[-8.8419622,6.1135944],[-8.8425593,6.1142338],[-8.8438657,6.1147441],[-8.8453235,6.1158663],[-8.8463635,6.1168063],[-8.8480031,6.1212313],[-8.8488827,6.1224281],[-8.8500844,6.1232094],[-8.8521018,6.1236759],[-8.8525954,6.1241667],[-8.8525471,6.1252225],[-8.8521135,6.1260847],[-8.8494218,6.1273523],[-8.8476705,6.1274465],[-8.8466194,6.1270664],[-8.8453899,6.1256558],[-8.8445416,6.1238753],[-8.8442149,6.1218797],[-8.8435274,6.1209682],[-8.8427106,6.1205622],[-8.8417557,6.120743],[-8.8408353,6.1214294],[-8.8399554,6.1226725],[-8.8394444,6.1243819],[-8.8391643,6.1272132],[-8.8389771,6.140894],[-8.8380392,6.1460229],[-8.8376113,6.1468739],[-8.8359667,6.1485091],[-8.83399,6.1502403],[-8.8320971,6.1506167],[-8.8306349,6.1504291],[-8.8256334,6.1490349],[-8.8247703,6.1491252],[-8.8241377,6.1497092],[-8.8234362,6.1522667],[-8.8222269,6.1535153],[-8.8223168,6.1543196],[-8.8226779,6.1549478],[-8.8294814,6.1586983],[-8.8308193,6.1595636],[-8.8321925,6.1604809],[-8.8351726,6.1616968],[-8.8357917,6.1625963],[-8.8361247,6.1640154],[-8.835742,6.1650618],[-8.8348401,6.1660529],[-8.8333389,6.1667991],[-8.8324636,6.1674862],[-8.8320041,6.1685367],[-8.8316769,6.1742988],[-8.8314398,6.1759965],[-8.8303764,6.1767654],[-8.8292222,6.1765742],[-8.8275221,6.1754473],[-8.8266682,6.1743627],[-8.8256379,6.1703577],[-8.8234943,6.166327],[-8.8225345,6.1657362],[-8.8210088,6.1656902],[-8.8192399,6.1660142],[-8.8170518,6.166801],[-8.8156107,6.1679103],[-8.8136547,6.1700402],[-8.8130908,6.1715349],[-8.8124977,6.1719281],[-8.81172,6.1717348],[-8.8074202,6.1690398],[-8.8064175,6.1690398],[-8.8056437,6.1694471],[-8.8050493,6.1703108],[-8.8049107,6.1715046],[-8.8050043,6.1741088],[-8.8048632,6.1760718],[-8.8039706,6.1786874],[-8.8034181,6.1809906],[-8.8023284,6.1830481],[-8.8014988,6.1851147],[-8.801138,6.1865496],[-8.8011206,6.1885311],[-8.8011921,6.1901896],[-8.8004618,6.1913886],[-8.7992107,6.1925272],[-8.796254,6.1938477],[-8.7945709,6.1945004],[-8.7934971,6.195241],[-8.7922762,6.1952119],[-8.7919131,6.1963474],[-8.7915666,6.1965162],[-8.7910835,6.1964745],[-8.7903732,6.1936841],[-8.7904953,6.1933992],[-8.7908154,6.1930443],[-8.7908691,6.1921697],[-8.790726,6.1916827],[-8.7904644,6.1912461],[-8.7899988,6.1905753],[-8.7888427,6.1895436],[-8.7876329,6.1883529],[-8.7866071,6.1875421],[-8.786349,6.1875845],[-8.785554,6.1873983],[-8.7854384,6.1874919],[-8.7845165,6.1876769],[-8.7839907,6.187712],[-8.7830115,6.1881313],[-8.7822053,6.1884214],[-8.7815196,6.1889835],[-8.7807392,6.1914275],[-8.7807223,6.1914877],[-8.7802081,6.192629],[-8.7787534,6.1937929],[-8.777945,6.1937694],[-8.7750789,6.1941643],[-8.7742474,6.1943643],[-8.7734267,6.1949509],[-8.7727555,6.1959349],[-8.772447,6.1967482],[-8.7719427,6.1973882],[-8.7708913,6.1984121],[-8.7699257,6.1987774],[-8.7687348,6.1990014],[-8.7678738,6.1988174],[-8.767206,6.1983134],[-8.7657683,6.1971695],[-8.7645613,6.1966895],[-8.7634187,6.1967748],[-8.7626408,6.1969775],[-8.7595915,6.1983616],[-8.7577247,6.1990121],[-8.7573251,6.1991136],[-8.7567698,6.1991321],[-8.7549888,6.1980389],[-8.7539777,6.197831],[-8.753012,6.1977562],[-8.7523255,6.1980123],[-8.7516977,6.1983535],[-8.7509199,6.1990468],[-8.7506249,6.1995908],[-8.7506224,6.2000469],[-8.7506195,6.2005453],[-8.7511774,6.2015827],[-8.7516709,6.2026173],[-8.7520035,6.2045372],[-8.75222,6.2064413],[-8.7521645,6.2080304],[-8.7516549,6.2088731],[-8.7508823,6.2094703],[-8.7501207,6.2096677],[-8.7493428,6.2095876],[-8.7473767,6.2087317],[-8.7464863,6.2085984],[-8.7456155,6.2085226],[-8.7439504,6.2085725],[-8.7424425,6.2088565],[-8.7417401,6.2093186],[-8.7417343,6.2100959],[-8.7422311,6.2114521],[-8.7426181,6.2123699],[-8.7438605,6.2128673],[-8.7446194,6.214539],[-8.7447511,6.2152105],[-8.7448744,6.2160133],[-8.7446357,6.2167825],[-8.7444969,6.2168799],[-8.7444016,6.2170905],[-8.7443735,6.2174532],[-8.744268,6.2177317],[-8.742861,6.2194212],[-8.7431354,6.2218161],[-8.7413059,6.2248939],[-8.7357056,6.2315753],[-8.7326304,6.2343377],[-8.7305254,6.2362285],[-8.7300742,6.237455],[-8.7302541,6.2399749],[-8.7302346,6.2406135],[-8.7302169,6.2409977],[-8.7297012,6.2414798],[-8.7295202,6.2415992],[-8.7279168,6.2426567],[-8.727278,6.2432804],[-8.7264567,6.2452787],[-8.7256068,6.2475284],[-8.7255987,6.2488534],[-8.7253333,6.2506986],[-8.7259283,6.2534567],[-8.7272053,6.2554657],[-8.72742,6.2569536],[-8.7275165,6.2583186],[-8.7273825,6.2590652],[-8.7270309,6.259617],[-8.7255639,6.2603769],[-8.7239908,6.2606882],[-8.722016,6.2613158],[-8.7206206,6.2627786],[-8.7203167,6.2659874],[-8.7211691,6.2739272],[-8.7208749,6.2757916],[-8.7199222,6.2769512],[-8.7177517,6.2788986],[-8.7165505,6.2805854],[-8.7158409,6.2845697],[-8.7154652,6.2858842],[-8.7136476,6.2871869],[-8.7132039,6.2876781],[-8.712691,6.2894342],[-8.7128037,6.2903303],[-8.7135739,6.2915744],[-8.7135938,6.2924474],[-8.7130922,6.2930257],[-8.7121752,6.2933485],[-8.7115367,6.2945045],[-8.7108019,6.2964051],[-8.709909,6.2979678],[-8.7091837,6.2983663],[-8.7089728,6.2990142],[-8.707203,6.3001242],[-8.7058488,6.3002357],[-8.7043213,6.2996627],[-8.7037942,6.3001843],[-8.7028039,6.3004754],[-8.7026583,6.3015639],[-8.7023833,6.3020785],[-8.7013167,6.3024214],[-8.698893,6.3030048],[-8.696673,6.3063402],[-8.6961413,6.3075966],[-8.6909232,6.3142403],[-8.6899648,6.3158532],[-8.6889652,6.3168313],[-8.6881578,6.3181637],[-8.6879484,6.3191554],[-8.687479,6.3200318],[-8.6864612,6.3222236],[-8.6855747,6.3231272],[-8.6848072,6.3236586],[-8.6847477,6.3246186],[-8.6853738,6.3265311],[-8.685912,6.3275243],[-8.6864123,6.3290441],[-8.6863506,6.3316325],[-8.6845247,6.3332478],[-8.6834586,6.3336997],[-8.6824706,6.3335506],[-8.6822141,6.3338826],[-8.6823669,6.3344002],[-8.681808,6.336388],[-8.680635,6.3396523],[-8.6802056,6.3421823],[-8.6801904,6.3429389],[-8.6803315,6.3439514],[-8.6799669,6.3443465],[-8.6791996,6.3445213],[-8.6786191,6.344313],[-8.6772286,6.3425814],[-8.6759761,6.3402221],[-8.6750074,6.3400735],[-8.6739092,6.340344],[-8.673152,6.340648],[-8.6720426,6.3413429],[-8.6713312,6.3424244],[-8.6694233,6.3446023],[-8.668112,6.3451816],[-8.6666967,6.347523],[-8.6663801,6.3510425],[-8.6660429,6.3530119],[-8.6652428,6.3540437],[-8.663969,6.3545913],[-8.6625191,6.3557976],[-8.6622915,6.3572748],[-8.6618226,6.35874],[-8.6606309,6.3602829],[-8.659056,6.3638416],[-8.6562479,6.3658182],[-8.6530675,6.3704385],[-8.6528849,6.371323],[-8.6532606,6.3725396],[-8.6532544,6.3741108],[-8.6524827,6.3749399],[-8.6520396,6.3757608],[-8.6521812,6.3770077],[-8.6536685,6.3801714],[-8.6539378,6.3828851],[-8.65339,6.3877966],[-8.6531934,6.3890061],[-8.6536057,6.3910754],[-8.6527625,6.3960023],[-8.6543598,6.3982612],[-8.6551087,6.3995223],[-8.6549774,6.4001984],[-8.6518172,6.4052154],[-8.6494443,6.407201],[-8.6491265,6.4082079],[-8.6498089,6.4091055],[-8.650652,6.4098386],[-8.6504157,6.4108845],[-8.6487466,6.4126146],[-8.6464366,6.4138986],[-8.6443833,6.4154661],[-8.6437295,6.4161219],[-8.6439858,6.4174426],[-8.644535,6.4187282],[-8.6460875,6.41973],[-8.6477372,6.4206883],[-8.6479484,6.4214749],[-8.6474261,6.4228867],[-8.6466624,6.4241913],[-8.6439761,6.4263131],[-8.6423677,6.4282202],[-8.6405568,6.4288791],[-8.6401148,6.4296746],[-8.6404607,6.4311708],[-8.6410823,6.4332913],[-8.6407895,6.434704],[-8.6400153,6.4360603],[-8.6387236,6.4369643],[-8.637422,6.4373606],[-8.6361862,6.4369235],[-8.6352995,6.436428],[-8.633824,6.4369411],[-8.6331574,6.437724],[-8.632415,6.4394862],[-8.6307487,6.4413792],[-8.6284942,6.4436061],[-8.6275781,6.4452279],[-8.6263893,6.447188],[-8.6261724,6.4480691],[-8.6262904,6.4495218],[-8.6279146,6.4520497],[-8.6280971,6.4530343],[-8.6278751,6.4553832],[-8.6268633,6.4585457],[-8.6259431,6.4596194],[-8.6245984,6.4604482],[-8.6235149,6.4606808],[-8.6212466,6.460293],[-8.6202755,6.4607636],[-8.6192493,6.4622306],[-8.6184314,6.463568],[-8.6187084,6.4645673],[-8.6187084,6.4653046],[-8.6173511,6.46698],[-8.6169151,6.4680791],[-8.6151121,6.4697733],[-8.6147079,6.4708135],[-8.6146974,6.4721526],[-8.6150263,6.4739101],[-8.61577,6.4765684],[-8.6178084,6.4795002],[-8.6180749,6.480902],[-8.6181703,6.4835198],[-8.6187455,6.4852297],[-8.619815,6.4862826],[-8.6211362,6.4873086],[-8.6214985,6.4881034],[-8.621668,6.4900246],[-8.6212245,6.4912132],[-8.62039,6.4919757],[-8.6184978,6.4932668],[-8.6168222,6.4952858],[-8.6100659,6.499868],[-8.6084974,6.50115],[-8.6068485,6.5023256],[-8.6030044,6.5038925],[-8.6019503,6.5048077],[-8.6014675,6.5054445],[-8.6008616,6.5054594],[-8.6006606,6.5056114],[-8.6000566,6.5056114],[-8.5994696,6.5061234],[-8.5992096,6.5062414],[-8.5989826,6.5062754],[-8.5985546,6.5061924],[-8.5984706,6.5061164],[-8.5983946,6.5057654],[-8.5982856,6.5057654],[-8.5981516,6.5059164],[-8.5980596,6.5059494],[-8.5979666,6.5059164],[-8.5979336,6.5057824],[-8.5978406,6.5057244],[-8.5977236,6.5057244],[-8.5974886,6.5059504],[-8.5973206,6.5059344],[-8.5972366,6.5055484],[-8.5969266,6.5055494],[-8.5968086,6.5054654],[-8.5967826,6.5050974],[-8.5969756,6.5050294],[-8.5975296,6.5049704],[-8.5975886,6.5048784],[-8.5974456,6.5048024],[-8.5974206,6.5046774],[-8.5974876,6.5045764],[-8.5976806,6.5044754],[-8.5976796,6.5043334],[-8.5974286,6.5042504],[-8.5974026,6.5041994],[-8.5973856,6.5038474],[-8.5968906,6.5037904],[-8.5967736,6.5036894],[-8.5966886,6.5031534],[-8.5971836,6.5025914],[-8.5970236,6.5023824],[-8.5968896,6.5023994],[-8.5966716,6.5027094],[-8.5965706,6.5026004],[-8.5965026,6.5022154],[-8.5965106,6.5018464],[-8.5968216,6.5015364],[-8.5968376,6.5014274],[-8.5966616,6.5012854],[-8.5966946,6.5011344],[-8.5968206,6.5009914],[-8.5969716,6.5008994],[-8.5972906,6.5008064],[-8.5973406,6.5007064],[-8.5973156,6.5006143],[-8.5970966,6.5005053],[-8.5967946,6.5004803],[-8.5965096,6.5003633],[-8.5955526,6.5002893],[-8.5949396,6.5001733],[-8.5947466,6.5000893],[-8.5927166,6.5000763],[-8.5925316,6.5001763],[-8.5923476,6.5001773],[-8.5922626,6.5000433],[-8.5916086,6.5000443],[-8.5917166,6.4994653],[-8.5903026,6.4991963],[-8.5887316,6.4992093],[-8.5882206,6.4987153],[-8.5874246,6.4984263],[-8.5865446,6.4988563],[-8.5862616,6.4994753],[-8.5859706,6.4998283],[-8.5854306,6.4998293],[-8.5851996,6.4997683],[-8.5848956,6.4998053],[-8.5847376,6.5000053],[-8.5845256,6.5001093],[-8.5841976,6.5001343],[-8.5834326,6.5000563],[-8.5833356,6.5001173],[-8.5831896,6.5004263],[-8.5830446,6.5005663],[-8.5826986,6.5006934],[-8.5825346,6.5009914],[-8.5820486,6.5011984],[-8.5818306,6.5013444],[-8.5816966,6.5016354],[-8.5815756,6.5017874],[-8.5810166,6.5019094],[-8.5807436,6.5021274],[-8.5807876,6.5028614],[-8.5805926,6.5029644],[-8.5802776,6.5030254],[-8.5800466,6.5031534],[-8.5797186,6.5035484],[-8.5795486,6.5036094],[-8.5792756,6.5036214],[-8.5790386,6.5035554],[-8.5788566,6.5035734],[-8.5786016,6.5037554],[-8.5783956,6.5038164],[-8.5778846,6.5037444],[-8.5775996,6.5037694],[-8.5773146,6.5039274],[-8.5771386,6.5039454],[-8.5769616,6.5038434],[-8.5766216,6.5034914],[-8.5762936,6.5034494],[-8.5760446,6.5033344],[-8.5758926,6.5033534],[-8.5754986,6.5037664],[-8.5752916,6.5037484],[-8.5751456,6.5036394],[-8.5750246,6.5034094],[-8.5749446,6.5029364],[-8.5746656,6.5027064],[-8.5739726,6.5027734],[-8.5737056,6.5026954],[-8.5733406,6.5022594],[-8.5728546,6.5022294],[-8.5726846,6.5021264],[-8.5724906,6.5021274],[-8.5723326,6.5022974],[-8.5722546,6.5028974],[-8.5721086,6.5031524],[-8.5719086,6.5032854],[-8.5709596,6.5033254],[-8.5706856,6.5032164],[-8.5705206,6.5029974],[-8.5705516,6.5027554],[-8.5702456,6.5024264],[-8.5701986,6.5022464],[-8.5701986,6.5019414],[-8.5695706,6.5013714],[-8.5694526,6.5010274],[-8.5692326,6.5008244],[-8.5691696,6.5004873],[-8.5690526,6.5001743],[-8.5688406,6.4999083],[-8.5683696,6.4997603],[-8.5667316,6.4997943],[-8.5663556,6.4996383],[-8.5660106,6.4996463],[-8.5651336,6.5002033],[-8.5648276,6.5005713],[-8.5644986,6.5008694],[-8.5642326,6.5009564],[-8.5635196,6.5009884],[-8.5632526,6.5009184],[-8.5626106,6.5009194],[-8.5622256,6.5007714],[-8.5619596,6.5007634],[-8.5617006,6.5008894],[-8.5615366,6.5010384],[-8.5614746,6.5017344],[-8.5612866,6.5020554],[-8.5609966,6.5021034],[-8.5608006,6.5020714],[-8.5606756,6.5018994],[-8.5604796,6.5017594],[-8.5603376,6.5018224],[-8.5600716,6.5020574],[-8.5598996,6.5021124],[-8.5596246,6.5019644],[-8.5594286,6.5017844],[-8.5594836,6.5015494],[-8.5594836,6.5011504],[-8.5592716,6.5008294],[-8.5592316,6.5000863],[-8.5590896,6.4999223],[-8.5588866,6.4998673],[-8.5586746,6.5000713],[-8.5585336,6.5001033],[-8.5583846,6.5000013],[-8.5582666,6.4997043],[-8.5580316,6.4994383],[-8.5576436,6.4992153],[-8.5565276,6.4988273],[-8.5561846,6.4987123],[-8.5551406,6.4985973],[-8.5547976,6.4984833],[-8.5545966,6.4983533],[-8.5542396,6.4982673],[-8.5539386,6.4983683],[-8.5537956,6.4986703],[-8.5537526,6.4990583],[-8.5539816,6.4994473],[-8.5538516,6.4997683],[-8.5534176,6.5000383],[-8.5531306,6.5001253],[-8.5527916,6.5000913],[-8.5525906,6.5000043],[-8.5523296,6.4997703],[-8.5517646,6.4996063],[-8.5515986,6.4994243],[-8.5509416,6.4990893],[-8.5504416,6.4989603],[-8.5500406,6.4987733],[-8.5496686,6.4984573],[-8.5490246,6.4977103],[-8.5488676,6.4971353],[-8.5486526,6.4958573],[-8.5484376,6.4956703],[-8.5478656,6.4955983],[-8.5464496,6.4955413],[-8.5460196,6.4954413],[-8.5456196,6.4951103],[-8.5448896,6.4943493],[-8.5444886,6.4940193],[-8.5437596,6.4929273],[-8.5434156,6.4926403],[-8.5428006,6.4922523],[-8.5422996,6.4920373],[-8.5410836,6.4910893],[-8.5396106,6.4903853],[-8.5387656,6.4892213],[-8.5384226,6.4889633],[-8.5370066,6.4885463],[-8.5359336,6.4880443],[-8.5353466,6.4876423],[-8.5351746,6.4870533],[-8.5351176,6.4866793],[-8.5350026,6.4864353],[-8.5346026,6.4860333],[-8.5336866,6.4853863],[-8.5330576,6.4850273],[-8.5324136,6.4848123],[-8.5314696,6.4846683],[-8.5306536,6.4847263],[-8.5301106,6.4845253],[-8.5297526,6.4840373],[-8.5294376,6.4833473],[-8.5289086,6.4819973],[-8.5285646,6.4813363],[-8.5280496,6.4807473],[-8.5274346,6.4803593],[-8.5268196,6.4800583],[-8.5264476,6.4797132],[-8.5263186,6.4793253],[-8.5263326,6.4790813],[-8.5264466,6.4787503],[-8.5268616,6.4784203],[-8.5271046,6.4781043],[-8.5271906,6.4778313],[-8.5270186,6.4773283],[-8.5267606,6.4768823],[-8.5266036,6.4764663],[-8.5265176,6.4750723],[-8.5265596,6.4740813],[-8.5264026,6.4735493],[-8.5260016,6.4728893],[-8.5258016,6.4723863],[-8.5256586,6.4717683],[-8.5255866,6.4710213],[-8.5254436,6.4703463],[-8.5248996,6.4696993],[-8.5242556,6.4690533],[-8.5233966,6.4677743],[-8.5224096,6.4665823],[-8.5219236,6.4653613],[-8.5215936,6.4646863],[-8.5215366,6.4644273],[-8.5213076,6.4640683],[-8.5209356,6.4637813],[-8.5203636,6.4631203],[-8.5201346,6.4627323],[-8.5197906,6.4619283],[-8.5195336,6.4607783],[-8.5193476,6.4603623],[-8.5190606,6.4600173],[-8.5186026,6.4592843],[-8.5183596,6.4587812],[-8.5179166,6.4582212],[-8.5179166,6.4582932],[-8.5176156,6.4579342],[-8.5175296,6.4576612],[-8.5172006,6.4573023],[-8.5164716,6.4565983],[-8.5160996,6.4563393],[-8.5153986,6.4555643],[-8.5152266,6.4551623],[-8.5151686,6.4549033],[-8.5149826,6.4545293],[-8.5146686,6.4541993],[-8.5145966,6.4531363],[-8.5144246,6.4526623],[-8.5141246,6.4523173],[-8.5127506,6.4516283],[-8.5124796,6.4513833],[-8.5121646,6.4509383],[-8.5117206,6.4497893],[-8.5113486,6.4492003],[-8.5105476,6.4485393],[-8.5098896,6.4479213],[-8.5085446,6.4469453],[-8.5076576,6.4463703],[-8.5073146,6.4459253],[-8.5068706,6.4454803],[-8.5060416,6.4447763],[-8.5058556,6.4445033],[-8.5052976,6.4440863],[-8.5047826,6.4440142],[-8.5038816,6.4437423],[-8.5036666,6.4434972],[-8.5035376,6.4429372],[-8.5034086,6.4426212],[-8.5032086,6.4423912],[-8.5028076,6.4422763],[-8.5023786,6.4422763],[-8.5021216,6.4421763],[-8.5018926,6.4419033],[-8.5018206,6.4415292],[-8.5016066,6.4411412],[-8.5010766,6.4407972],[-8.5006766,6.4407392],[-8.5003336,6.4405812],[-8.5000896,6.4403233],[-8.4997036,6.4396042],[-8.4983446,6.4390873],[-8.4976296,6.4387573],[-8.4962996,6.4380533],[-8.4951696,6.4375513],[-8.4942256,6.4372923],[-8.4935246,6.4370053],[-8.4928946,6.4366313],[-8.4921226,6.4362583],[-8.4909786,6.4358133],[-8.4902346,6.4356843],[-8.4885326,6.4350953],[-8.4852286,6.4347073],[-8.4829966,6.4343483],[-8.4818526,6.4342483],[-8.4807376,6.4343343],[-8.4793066,6.4349093],[-8.4777196,6.4358293],[-8.4763036,6.4368063],[-8.4754746,6.4375823],[-8.4747736,6.4384583],[-8.4743596,6.4392482],[-8.4742026,6.4405132],[-8.4740026,6.4416483],[-8.4737166,6.4428552],[-8.4729156,6.4449383],[-8.4726296,6.4459153],[-8.4725016,6.4469063],[-8.4724016,6.4481133],[-8.4724166,6.4503263],[-8.4728886,6.4545783],[-8.4728746,6.4550523],[-8.4724886,6.4560013],[-8.4721166,6.4563883],[-8.4701716,6.4570933],[-8.4693566,6.4572513],[-8.4688276,6.4574092],[-8.4676836,6.4580272],[-8.4668396,6.4587882],[-8.4664966,6.4592052],[-8.4660956,6.4595643],[-8.4641796,6.4600963],[-8.4633496,6.4605993],[-8.4626206,6.4614033],[-8.4611906,6.4633723],[-8.4606046,6.4644493],[-8.4599466,6.4654263],[-8.4589306,6.4667623],[-8.4579446,6.4678693],[-8.4573436,6.4686453],[-8.4565996,6.4701243],[-8.4562716,6.4710873],[-8.4562996,6.4724523],[-8.4566146,6.4731273],[-8.4571016,6.4736163],[-8.4574156,6.4742193],[-8.4581746,6.4776963],[-8.4584466,6.4785293],[-8.4590476,6.4799803],[-8.4591616,6.4809283],[-8.4594486,6.4821213],[-8.4602066,6.4841753],[-8.4618096,6.4868623],[-8.4620806,6.4874793],[-8.4627396,6.4900943],[-8.4629546,6.4913873],[-8.4632266,6.4920193],[-8.4643706,6.4937003],[-8.4649576,6.4948063],[-8.4662456,6.4969043],[-8.4665166,6.4976083],[-8.4664886,6.4985133],[-8.4660286,6.4999653],[-8.4654196,6.5005963],[-8.4648316,6.5013094],[-8.4630266,6.5032254],[-8.4621936,6.5034904],[-8.4607116,6.5036564],[-8.4591266,6.5032514],[-8.4579676,6.5028674],[-8.4557516,6.5016904],[-8.4548976,6.5011634],[-8.4541446,6.5005543],[-8.4533316,6.4998023],[-8.4528276,6.4994123],[-8.4521266,6.4989953],[-8.4497526,6.4982483],[-8.4488516,6.4979183],[-8.4478496,6.4977173],[-8.4445746,6.4976453],[-8.4438306,6.4977743],[-8.4432726,6.4978173],[-8.4429146,6.4977023],[-8.4425576,6.4974293],[-8.4419846,6.4967113],[-8.4407836,6.4943413],[-8.4406406,6.4938953],[-8.4405826,6.4932923],[-8.4403536,6.4925453],[-8.4398536,6.4916403],[-8.4395666,6.4908493],[-8.4393526,6.4899593],[-8.4392946,6.4893703],[-8.4394096,6.4885793],[-8.4395956,6.4878613],[-8.4398526,6.4865543],[-8.4398666,6.4852033],[-8.4396236,6.4842413],[-8.4392656,6.4835943],[-8.4389086,6.4827613],[-8.4386076,6.4823593],[-8.4385646,6.4822013],[-8.4386936,6.4797733],[-8.4386646,6.4792273],[-8.4387646,6.4785803],[-8.4388786,6.4771433],[-8.4387786,6.4765973],[-8.4386646,6.4762673],[-8.4386496,6.4758223],[-8.4385496,6.4754913],[-8.4384926,6.4747873],[-8.4383346,6.4742133],[-8.4380346,6.4736093],[-8.4376486,6.4730203],[-8.4370326,6.4712963],[-8.4367326,6.4707213],[-8.4361036,6.4698453],[-8.4347446,6.4682073],[-8.4343006,6.4678343],[-8.4329846,6.4670583],[-8.4324836,6.4667133],[-8.4319406,6.4664263],[-8.4314546,6.4659803],[-8.4308816,6.4653773],[-8.4287076,6.4624323],[-8.4280636,6.4620153],[-8.4276916,6.4615843],[-8.4269196,6.4603773],[-8.4263326,6.4597883],[-8.4257176,6.4594003],[-8.4251746,6.4591852],[-8.4242446,6.4590132],[-8.4225286,6.4590992],[-8.4220276,6.4590272],[-8.4213556,6.4586822],[-8.4205976,6.4580642],[-8.4195676,6.4573603],[-8.4190666,6.4571163],[-8.4185806,6.4570873],[-8.4180946,6.4571163],[-8.4178086,6.4572023],[-8.4172786,6.4571163],[-8.4168216,6.4569873],[-8.4161346,6.4569873],[-8.4157626,6.4567423],[-8.4153766,6.4561823],[-8.4150616,6.4551623],[-8.4146326,6.4545873],[-8.4140606,6.4540563],[-8.4127446,6.4533093],[-8.4115146,6.4527053],[-8.4105706,6.4523033],[-8.4096836,6.4520593],[-8.4092836,6.4515563],[-8.4084826,6.4507233],[-8.4084246,6.4500473],[-8.4081956,6.4493153],[-8.4077386,6.4487543],[-8.4070806,6.4484093],[-8.4066086,6.4480223],[-8.4062076,6.4473753],[-8.4057216,6.4467723],[-8.4053786,6.4465563],[-8.4044056,6.4462543],[-8.4039766,6.4460243],[-8.4031036,6.4453643],[-8.4023886,6.4450473],[-8.4020596,6.4447463],[-8.4015016,6.4447313],[-8.4002436,6.4449043],[-8.3983416,6.4444443],[-8.3976256,6.4442003],[-8.3971536,6.4438833],[-8.3966396,6.4436252],[-8.3962956,6.4432802],[-8.3961526,6.4429352],[-8.3960526,6.4426332],[-8.3961956,6.4423752],[-8.3964676,6.4422463],[-8.3967826,6.4422463],[-8.3978976,6.4415703],[-8.3981696,6.4413122],[-8.3995136,6.4405502],[-8.4001576,6.4398473],[-8.4006006,6.4391863],[-8.4032973,6.4388706],[-8.4056548,6.4386056],[-8.4063677,6.4369525],[-8.407382,6.4355265],[-8.4123788,6.4322136],[-8.4128314,6.4312851],[-8.4125656,6.4292554],[-8.4122951,6.4281663],[-8.4115941,6.4275516],[-8.4112621,6.4263146],[-8.4103355,6.4257299],[-8.4091447,6.4257155],[-8.4085805,6.426099],[-8.4074435,6.4275636],[-8.407313,6.4281256],[-8.4070794,6.4305423],[-8.4067239,6.4323634],[-8.4065355,6.4331657],[-8.4061526,6.4338632],[-8.4059748,6.4339123],[-8.4053561,6.4337869],[-8.4032044,6.4318876],[-8.4032728,6.4249938],[-8.4016804,6.4200577],[-8.3972891,6.4157452],[-8.3933425,6.4110253],[-8.3930049,6.4098849],[-8.3849167,6.3860098],[-8.3931129,6.3783076],[-8.3977262,6.3785623],[-8.4030598,6.3762017],[-8.406242,6.3729306],[-8.4073094,6.3721488],[-8.4092125,6.3715509],[-8.4097433,6.3715156],[-8.4119932,6.3726684],[-8.4130845,6.373032],[-8.4137693,6.3728695],[-8.414707,6.3706897],[-8.4146997,6.3702984],[-8.4127192,6.3681755],[-8.4122434,6.368024],[-8.411778,6.3683514],[-8.4100774,6.3695013],[-8.4086194,6.3698966],[-8.4074194,6.3696613],[-8.4062381,6.369119],[-8.404666,6.3680323],[-8.4018675,6.3643506],[-8.4006746,6.3625246],[-8.3999678,6.3599551],[-8.3992333,6.3569362],[-8.398313,6.3548487],[-8.3976498,6.3542762],[-8.3912864,6.351467],[-8.3887219,6.3508093],[-8.3872071,6.3524698],[-8.3876314,6.3579104],[-8.3869516,6.3597829],[-8.384354,6.3617343],[-8.3827033,6.3626082],[-8.3808087,6.3625771],[-8.3758481,6.361211],[-8.3748953,6.3619726],[-8.3743752,6.3626411],[-8.3745147,6.3651089],[-8.3749017,6.3667273],[-8.3750396,6.3674958],[-8.3747392,6.3680908],[-8.3741882,6.3682248],[-8.3734572,6.3675411],[-8.3727304,6.3666593],[-8.370018,6.3663675],[-8.3689313,6.3661598],[-8.3665076,6.3638489],[-8.3657496,6.3625761],[-8.3650365,6.3610937],[-8.3646478,6.3608394],[-8.3642101,6.361238],[-8.3643442,6.3629377],[-8.3640799,6.364327],[-8.363519,6.3646754],[-8.360419,6.3660958],[-8.3588212,6.366543],[-8.3574398,6.3679733],[-8.3568774,6.3681399],[-8.3565212,6.3678446],[-8.3557174,6.3664884],[-8.3524675,6.3657678],[-8.3518677,6.365883],[-8.3517314,6.366351],[-8.3515022,6.367727],[-8.3511485,6.3685753],[-8.3506132,6.3690904],[-8.3488098,6.3692685],[-8.3481467,6.369609],[-8.3475235,6.3701966],[-8.3461633,6.372097],[-8.3453105,6.3747701],[-8.3443339,6.3768634],[-8.3437276,6.3783117],[-8.3432931,6.378529],[-8.3416872,6.3788671],[-8.3412461,6.378804],[-8.3410468,6.3786795],[-8.3410724,6.3784357],[-8.3413974,6.3777174],[-8.3415611,6.3770077],[-8.3416102,6.375927],[-8.3412226,6.3746934],[-8.3406434,6.3735351],[-8.3399027,6.3726886],[-8.3388874,6.3719184],[-8.3382336,6.3715552],[-8.3376472,6.371574],[-8.3351022,6.372751],[-8.3343926,6.3728995],[-8.3337853,6.3728037],[-8.3321302,6.3714898],[-8.3299597,6.3701205],[-8.3284724,6.3681418],[-8.3277562,6.3677633],[-8.3257573,6.3670991],[-8.3236219,6.3659021],[-8.3212971,6.3630724],[-8.3197187,6.3614279],[-8.3187653,6.3606704],[-8.3182627,6.3595409],[-8.3172451,6.3592289],[-8.3165318,6.3601436],[-8.315182,6.3621189],[-8.314362,6.3629379],[-8.3141258,6.3629517],[-8.3139237,6.3627663],[-8.3140899,6.3617542],[-8.3136618,6.3603434],[-8.3115297,6.3593151],[-8.3103907,6.3569421],[-8.3102893,6.3546586],[-8.3092868,6.3523619],[-8.3077688,6.3508325],[-8.3057454,6.3490916],[-8.3049983,6.3487306],[-8.304518,6.3487439],[-8.3034202,6.3494699],[-8.3030499,6.3499239],[-8.3020897,6.3508253],[-8.3018284,6.3514104],[-8.3017397,6.3518286],[-8.3018583,6.3529916],[-8.3017205,6.3538531],[-8.3014935,6.3543978],[-8.3011237,6.3549021],[-8.3004545,6.3552926],[-8.2997083,6.3553482],[-8.2984816,6.3549467],[-8.2981067,6.3546186],[-8.2971857,6.354243],[-8.2959448,6.3538574],[-8.2953638,6.35387],[-8.2948206,6.3540752],[-8.2942692,6.354199],[-8.2937597,6.3541104],[-8.2933987,6.3539463],[-8.2930726,6.3536319],[-8.2922813,6.3531328],[-8.2915196,6.3528993],[-8.2901346,6.3528511],[-8.2880719,6.3531255],[-8.2859405,6.3536318],[-8.2854318,6.3535885],[-8.2851682,6.3533957],[-8.2841109,6.3513966],[-8.2838901,6.349888],[-8.2834675,6.3486203],[-8.2834853,6.3478551],[-8.2836459,6.3471946],[-8.2838349,6.3468339],[-8.2847392,6.345985],[-8.28511,6.3453604],[-8.2851882,6.3447153],[-8.2851099,6.3439916],[-8.2847567,6.3434813],[-8.2840579,6.3427457],[-8.2835444,6.341792],[-8.2831519,6.3412033],[-8.2824862,6.3409612],[-8.2819007,6.3410016],[-8.2792638,6.3425801],[-8.2782543,6.3428685],[-8.2772309,6.3429044],[-8.2760686,6.3425593],[-8.2732518,6.3414662],[-8.2719657,6.3411906],[-8.2713935,6.3408611],[-8.2711442,6.3404622],[-8.271111,6.3400475],[-8.271272,6.3395644],[-8.2715536,6.3384007],[-8.2715536,6.337909],[-8.2712197,6.3374499],[-8.2706198,6.33719],[-8.2699629,6.3371524],[-8.2690872,6.336938],[-8.2684978,6.3365046],[-8.2682036,6.3358816],[-8.2681701,6.3353794],[-8.2684233,6.3349406],[-8.2692189,6.3341992],[-8.2702494,6.3335122],[-8.2706092,6.3334304],[-8.2712271,6.3336122],[-8.2721208,6.3335931],[-8.2737637,6.3333347],[-8.2753923,6.3334087],[-8.2789818,6.3327579],[-8.2797466,6.3325284],[-8.2802798,6.3321137],[-8.280704,6.3313392],[-8.2811634,6.3310159],[-8.2815292,6.3309494],[-8.2821566,6.3310417],[-8.2826634,6.3309637],[-8.283285,6.33075],[-8.2839212,6.3301886],[-8.2844369,6.3299041],[-8.2856999,6.3295326],[-8.2863862,6.3290622],[-8.2866305,6.3285328],[-8.2866305,6.3280167],[-8.2863445,6.3275469],[-8.2853382,6.3268202],[-8.284464,6.3258002],[-8.2841057,6.325227],[-8.2838839,6.3245059],[-8.283508,6.3238928],[-8.2828126,6.3235749],[-8.2817491,6.323499],[-8.2794963,6.3236665],[-8.2752699,6.3244786],[-8.2745744,6.3244073],[-8.2729122,6.3239086],[-8.2705119,6.3235394],[-8.2697413,6.3232348],[-8.2691657,6.322803],[-8.2683059,6.3219992],[-8.2673706,6.3215793],[-8.2663994,6.3214079],[-8.2653786,6.3215024],[-8.2638244,6.3218582],[-8.2624811,6.3225015],[-8.2612747,6.3238137],[-8.2609475,6.3243969],[-8.2608123,6.3249645],[-8.2605182,6.3253865],[-8.2600891,6.3257525],[-8.2596663,6.3258129],[-8.2592377,6.3256868],[-8.2587092,6.3253829],[-8.254389,6.322153],[-8.2532949,6.3213914],[-8.2524961,6.3211735],[-8.2519162,6.3213519],[-8.2511893,6.3218903],[-8.2499823,6.3219976],[-8.246996,6.3228371],[-8.2465009,6.323172],[-8.2461423,6.3236885],[-8.2455697,6.3250244],[-8.2450461,6.3257575],[-8.2446749,6.3259491],[-8.2439998,6.3258854],[-8.2432997,6.3256001],[-8.2427503,6.3250245],[-8.2424133,6.3244931],[-8.2422243,6.3232915],[-8.242047,6.3227894],[-8.2415278,6.3223741],[-8.240433,6.322083],[-8.2398947,6.3218862],[-8.2394699,6.3215514],[-8.2388453,6.320696],[-8.2383857,6.3202651],[-8.2353575,6.3191413],[-8.2339269,6.318372],[-8.2329406,6.3176019],[-8.2301332,6.3151758],[-8.2280916,6.3125567],[-8.227409,6.3118049],[-8.2267169,6.3116901],[-8.2256355,6.3120121],[-8.2251871,6.3118937],[-8.224298,6.310788],[-8.2246819,6.3098789],[-8.223537,6.3085002],[-8.2224016,6.3076911],[-8.2215833,6.3073229],[-8.2200089,6.3077423],[-8.2183805,6.3080308],[-8.2163223,6.3081459],[-8.215068,6.3092239],[-8.213874,6.3107616],[-8.213173,6.3112991],[-8.2111815,6.3115032],[-8.2106412,6.3113689],[-8.2100415,6.3107445],[-8.2100217,6.3103365],[-8.2107025,6.3096489],[-8.2113148,6.3088159],[-8.2115979,6.3078245],[-8.2111615,6.3064866],[-8.2101405,6.3056858],[-8.2088692,6.3057912],[-8.2068429,6.3062306],[-8.2054645,6.3058301],[-8.2047668,6.306124],[-8.2042083,6.3069636],[-8.2030962,6.3088395],[-8.2020727,6.3095515],[-8.2008635,6.3100607],[-8.2001906,6.3100416],[-8.1998059,6.3096958],[-8.199592,6.3084802],[-8.1973732,6.3063837],[-8.1955699,6.305463],[-8.1941058,6.3034448],[-8.1934232,6.3031417],[-8.1920517,6.3029501],[-8.1904953,6.3030119],[-8.1896407,6.302518],[-8.1891876,6.3018068],[-8.1894322,6.3006802],[-8.1902102,6.2997417],[-8.1893321,6.29842],[-8.1890763,6.2956225],[-8.1886491,6.2941952],[-8.1878238,6.293397],[-8.1858036,6.2931652],[-8.1845645,6.2935783],[-8.1837,6.2934829],[-8.1834382,6.2929609],[-8.1823285,6.291826],[-8.180626,6.2916789],[-8.1797833,6.29132],[-8.1784759,6.289685],[-8.1773023,6.2892886],[-8.1764859,6.2887281],[-8.1761245,6.2873112],[-8.1765454,6.285919],[-8.1764991,6.2839344],[-8.1761753,6.2809429],[-8.1752973,6.2796495],[-8.1737594,6.2801955],[-8.1719678,6.2803111],[-8.1701683,6.2805362],[-8.1679374,6.2797506],[-8.1666527,6.2797338],[-8.1644047,6.280466],[-8.1631931,6.2811697],[-8.1627697,6.2823196],[-8.1628353,6.283649],[-8.1625153,6.2843604],[-8.1618775,6.2846076],[-8.1608421,6.2842135],[-8.1585678,6.2822716],[-8.1575373,6.2820474],[-8.1558717,6.2822318],[-8.1545633,6.2827157],[-8.15353,6.2838107],[-8.1527041,6.2838413],[-8.1510904,6.282742],[-8.1484947,6.2822784],[-8.146159,6.2808915],[-8.1455592,6.2807703],[-8.145059,6.281439],[-8.1448759,6.2826504],[-8.1441472,6.2832523],[-8.1429713,6.2837423],[-8.1402241,6.2838093],[-8.139034,6.2841159],[-8.1375004,6.2851633],[-8.1364482,6.2851943],[-8.1358186,6.2849739],[-8.1342161,6.2835536],[-8.1330826,6.2830869],[-8.131543,6.2828568],[-8.1305442,6.2828737],[-8.1299678,6.2833598],[-8.1297739,6.2842002],[-8.1285963,6.2850604],[-8.126311,6.285748],[-8.1223137,6.2859979],[-8.1212479,6.2863611],[-8.1196033,6.2876038],[-8.1191181,6.2891507],[-8.1184079,6.2901433],[-8.1174563,6.2906025],[-8.1159676,6.2908545],[-8.1148799,6.2913399],[-8.1135857,6.2928616],[-8.1125355,6.2934145],[-8.1100116,6.2937064],[-8.1085654,6.2937064],[-8.1067155,6.2928883],[-8.1053038,6.2924629],[-8.1037227,6.2925772],[-8.1022953,6.2929105],[-8.1009106,6.2945248],[-8.0998268,6.2962186],[-8.0983021,6.29739],[-8.0974074,6.2986079],[-8.0970464,6.3008876],[-8.0965619,6.3012897],[-8.0967923,6.3032891],[-8.0962263,6.3036563],[-8.0951053,6.30475],[-8.0938596,6.3054456],[-8.0926244,6.306771],[-8.0913099,6.3071428],[-8.0893158,6.3078983],[-8.0880417,6.3078225],[-8.0867087,6.3070704],[-8.085804,6.3059086],[-8.0852537,6.3035628],[-8.0845615,6.3027167],[-8.0824584,6.301502],[-8.0803759,6.3009623],[-8.0788911,6.3009869],[-8.077091,6.3013212],[-8.0759235,6.3018947],[-8.0751845,6.3028127],[-8.0745526,6.3042531],[-8.07404,6.3052786],[-8.0729518,6.3059308],[-8.0722531,6.3058374],[-8.0711415,6.3051685],[-8.0704018,6.3049196],[-8.0693198,6.3051978],[-8.0685579,6.3058426],[-8.0674456,6.3070684],[-8.0658497,6.3085564],[-8.0644321,6.309447],[-8.0631757,6.309681],[-8.0621085,6.3094478],[-8.0611482,6.3088584],[-8.0603919,6.3086853],[-8.059166,6.309034],[-8.0582616,6.3092318],[-8.0570029,6.3087726],[-8.0540294,6.3059389],[-8.0533299,6.3057868],[-8.0524784,6.3058823],[-8.048872,6.3086941],[-8.0473118,6.3105314],[-8.0457375,6.3132928],[-8.0450187,6.3143319],[-8.0444733,6.3148547],[-8.0435971,6.315289],[-8.0427774,6.3153683],[-8.0418211,6.3147125],[-8.0410912,6.3141236],[-8.0403333,6.3141241],[-8.0394407,6.3147288],[-8.0379244,6.3151805],[-8.0362065,6.3160319],[-8.0337342,6.3165877],[-8.0324089,6.3167226],[-8.0307835,6.31651],[-8.0296692,6.3165877],[-8.0287456,6.316963],[-8.0281307,6.3178716],[-8.0270406,6.3187179],[-8.0260319,6.3190257],[-8.0243252,6.3190528],[-8.0230458,6.3189664],[-8.0219146,6.3189409],[-8.0203473,6.3192195],[-8.0176877,6.3200878],[-8.0156917,6.3201425],[-8.0136416,6.3205064],[-8.0116488,6.3215151],[-8.0089378,6.3219746],[-8.0061774,6.3225004],[-8.0051638,6.3222723],[-8.0044539,6.3217145],[-8.002135,6.3185638],[-7.9999062,6.3165399],[-7.9991494,6.315556],[-7.9985971,6.3145016],[-7.997959,6.3115154],[-7.9970096,6.3082568],[-7.9960765,6.3054507],[-7.9958944,6.3043583],[-7.9959464,6.3034225],[-7.9962924,6.3013466],[-7.9961288,6.3001193],[-7.9953995,6.2987687],[-7.9941157,6.2971906],[-7.9933515,6.2965358],[-7.9926477,6.2962823],[-7.9920267,6.2963415],[-7.9914622,6.2969343],[-7.9901875,6.2988994],[-7.9892251,6.3001739],[-7.9882591,6.300657],[-7.9864762,6.3008405],[-7.9829359,6.301316],[-7.9820998,6.3012654],[-7.9815878,6.3009484],[-7.9811917,6.3003294],[-7.9811443,6.2997605],[-7.9821401,6.2983697],[-7.9824123,6.2972535],[-7.9824397,6.2960219],[-7.9819936,6.2951856],[-7.9812241,6.2944986],[-7.9802379,6.2940877],[-7.9795651,6.2940316],[-7.9788809,6.2942311],[-7.9782336,6.2949348],[-7.9779873,6.2958379],[-7.9773811,6.2989743],[-7.9769354,6.2996924],[-7.9757975,6.3000717],[-7.9745871,6.3000717],[-7.9736167,6.2997652],[-7.9705994,6.2972463],[-7.9699292,6.2962668],[-7.9693507,6.2941632],[-7.9685009,6.2914813],[-7.9676217,6.2894115],[-7.9657749,6.2870437],[-7.964242,6.2860756],[-7.9626355,6.2855334],[-7.9611912,6.2853128],[-7.9601534,6.2853128],[-7.9592741,6.2856268],[-7.958948,6.2860399],[-7.9587,6.2866598],[-7.958543,6.2876213],[-7.9580425,6.2884299],[-7.9571705,6.2895199],[-7.9564146,6.2907532],[-7.954532,6.2936402],[-7.9539267,6.2939607],[-7.9524353,6.2940181],[-7.951726,6.2943423],[-7.9513138,6.2947751],[-7.9510895,6.2953463],[-7.9510297,6.2961228],[-7.9514694,6.2986844],[-7.9513597,6.2992514],[-7.9511409,6.2998713],[-7.9507453,6.3002497],[-7.9499346,6.3003398],[-7.9491609,6.3002108],[-7.9484326,6.2998468],[-7.947838,6.2990291],[-7.9469309,6.2974852],[-7.9452716,6.2960575],[-7.9442647,6.2950885],[-7.9431809,6.2936267],[-7.9415511,6.2907745],[-7.9396357,6.2880036],[-7.9371027,6.2852169],[-7.9349912,6.2830248],[-7.9336231,6.281919],[-7.9326111,6.2814418],[-7.9316477,6.2813646],[-7.9305921,6.2816141],[-7.9295122,6.2823531],[-7.9276653,6.2840881],[-7.9268968,6.2850814],[-7.9263471,6.2859724],[-7.9260473,6.2872838],[-7.9253277,6.2897379],[-7.9245597,6.2914202],[-7.9237272,6.2923252],[-7.9227521,6.2929932],[-7.92188,6.2932246],[-7.9211917,6.2931716],[-7.9204096,6.2928695],[-7.9192684,6.291855],[-7.9185019,6.2906322],[-7.9178648,6.2892541],[-7.9176047,6.2882165],[-7.9174227,6.2869609],[-7.9175668,6.2861868],[-7.9181234,6.2842941],[-7.9184031,6.2822617],[-7.9184965,6.2804298],[-7.9183783,6.2797011],[-7.9182713,6.2790405],[-7.9177685,6.2773458],[-7.9172076,6.2756633],[-7.9164703,6.2745289],[-7.9155971,6.2737127],[-7.9148746,6.2733417],[-7.9138299,6.2733742],[-7.9134803,6.2736204],[-7.9129883,6.2743485],[-7.9126671,6.2754635],[-7.9124241,6.2768092],[-7.912312,6.2785837],[-7.9124241,6.2799092],[-7.9127741,6.2828203],[-7.9125476,6.2837963],[-7.9115239,6.2844317],[-7.9104074,6.284748],[-7.9088661,6.2858993],[-7.9080297,6.2862018],[-7.906157,6.2861473],[-7.9043083,6.2855615],[-7.9027931,6.2847948],[-7.9018548,6.2838746],[-7.9013911,6.2829116],[-7.9013739,6.2822533],[-7.9016375,6.2816206],[-7.9021418,6.2809722],[-7.9034156,6.2798107],[-7.9037073,6.2789551],[-7.9037464,6.2781747],[-7.9025311,6.2752375],[-7.9006963,6.2727959],[-7.8993015,6.2695583],[-7.8968426,6.2650489],[-7.8951381,6.2615398],[-7.8946078,6.2600391],[-7.8942255,6.2576651],[-7.8923242,6.2561448],[-7.8907536,6.2540641],[-7.889744,6.2537451],[-7.8884654,6.2540615],[-7.8871127,6.2551661],[-7.8857022,6.2552403],[-7.8843997,6.2539586],[-7.8830539,6.251386],[-7.8822895,6.248153],[-7.881269,6.2466173],[-7.8802533,6.2460389],[-7.8784988,6.245905],[-7.8761812,6.2450625],[-7.8726074,6.2426859],[-7.8679462,6.2400238],[-7.8666288,6.2390245],[-7.8657207,6.2376079],[-7.8645573,6.2366002],[-7.8629861,6.2342761],[-7.8614404,6.2332341],[-7.8597452,6.2325796],[-7.8575717,6.2322702],[-7.8566324,6.2314239],[-7.8544399,6.2288276],[-7.8529847,6.2261739],[-7.8517705,6.2223654],[-7.8510519,6.2210762],[-7.8497286,6.2209048],[-7.848416,6.2213098],[-7.8476229,6.2208503],[-7.8468484,6.2196792],[-7.8466308,6.2167507],[-7.8456419,6.2151603],[-7.8441517,6.2135603],[-7.8416565,6.211375],[-7.8384261,6.2092729],[-7.8380234,6.2081289],[-7.8372486,6.2061737],[-7.8361056,6.204559],[-7.8280197,6.1990411],[-7.8242017,6.1968879],[-7.8225799,6.1951287],[-7.8223098,6.1939661],[-7.8225181,6.1930387],[-7.8230951,6.1923694],[-7.8239092,6.1914252],[-7.8262432,6.1900329],[-7.828749,6.1896274],[-7.8330386,6.1903868],[-7.8390771,6.1929176],[-7.8415388,6.193216],[-7.8429445,6.1928514],[-7.8444101,6.1915765],[-7.8448925,6.1895388],[-7.8451161,6.1881173],[-7.8446559,6.1864565],[-7.8437587,6.1852617],[-7.8423378,6.1852046],[-7.8404121,6.1850592],[-7.8382025,6.1840256],[-7.8369228,6.1830898],[-7.8365297,6.1820788],[-7.836966,6.1811569],[-7.8384727,6.1791145],[-7.8402006,6.1754729],[-7.8406642,6.1732185],[-7.8408915,6.1702843],[-7.8405418,6.1683125],[-7.8390114,6.1668217],[-7.8349192,6.164415],[-7.8337946,6.1635271],[-7.8337577,6.1622897],[-7.8342296,6.1610325],[-7.8354962,6.1598427],[-7.8367973,6.1591919],[-7.8402022,6.1591174],[-7.8421507,6.1594896],[-7.8428295,6.1592004],[-7.8454308,6.155703],[-7.8465661,6.1553079],[-7.8485907,6.1552783],[-7.8495758,6.1546661],[-7.8510158,6.1530853],[-7.8518639,6.151429],[-7.8515064,6.1438456],[-7.8502574,6.1415394],[-7.8497324,6.1397413],[-7.8497324,6.134587],[-7.8501871,6.1315134],[-7.8513886,6.1297868],[-7.853182,6.1281165],[-7.853594,6.1265991],[-7.8532387,6.1245177],[-7.853031,6.1227323],[-7.8535417,6.1153083],[-7.8533736,6.1102947],[-7.8522826,6.1070403],[-7.8517842,6.1047274],[-7.8517842,6.1023522],[-7.8547053,6.096792],[-7.8555492,6.0941066],[-7.8556357,6.0922146],[-7.854566,6.0911508],[-7.8522528,6.0911508],[-7.8481549,6.0918161],[-7.8465415,6.0917359],[-7.8459263,6.0909712],[-7.8459263,6.0895423],[-7.8495964,6.0837364],[-7.8512784,6.0798059],[-7.8517028,6.077358],[-7.8512661,6.075621],[-7.8494928,6.0748275],[-7.8477573,6.075863],[-7.845586,6.0781881],[-7.8439475,6.0789212],[-7.8404325,6.0793374],[-7.8376267,6.0806055],[-7.8371318,6.0813661],[-7.8371318,6.0823324],[-7.8373692,6.0829733],[-7.8385635,6.084485],[-7.8388399,6.0861838],[-7.8377109,6.0889784],[-7.8356494,6.0907502],[-7.8336423,6.0954873],[-7.8324244,6.0966934],[-7.8308364,6.0971857],[-7.8268661,6.0952117],[-7.8211416,6.0927449],[-7.8193184,6.0915088],[-7.8174134,6.0895321],[-7.8160791,6.0867958],[-7.8145941,6.0844731],[-7.8131039,6.0837562],[-7.8117255,6.0841963],[-7.8104358,6.0853744],[-7.8117886,6.0884938],[-7.811836,6.0906631],[-7.8105734,6.0920868],[-7.8051841,6.0934787],[-7.8030833,6.0934787],[-7.8015448,6.0928315],[-7.800843,6.091843],[-7.8002332,6.0889319],[-7.7989342,6.0869022],[-7.7956839,6.0836703],[-7.7939842,6.082463],[-7.7934612,6.081654],[-7.7934039,6.0808003],[-7.7940073,6.0796004],[-7.7943223,6.0781597],[-7.7938109,6.0768248],[-7.7922606,6.0757148],[-7.7907485,6.0745121],[-7.7900413,6.0735157],[-7.7899248,6.0723573],[-7.7905799,6.0708174],[-7.7925213,6.068344],[-7.7980185,6.0626346],[-7.7995626,6.0603006],[-7.7998136,6.0588032],[-7.7995029,6.0570109],[-7.7988139,6.055516],[-7.7968893,6.054096],[-7.7943966,6.0530078],[-7.7911677,6.0494333],[-7.7898583,6.0485652],[-7.7880528,6.0481319],[-7.7855459,6.0483143],[-7.7844703,6.048136],[-7.7835324,6.0477863],[-7.7829542,6.0470387],[-7.7823452,6.0447376],[-7.7816504,6.043607],[-7.7803838,6.0429142],[-7.7780596,6.0427317],[-7.7761969,6.0418952],[-7.769815,6.036818],[-7.7693485,6.0359481],[-7.7692911,6.0348637],[-7.7699255,6.0341754],[-7.7715368,6.0329429],[-7.7717345,6.0320255],[-7.7714048,6.0310418],[-7.7702979,6.0305526],[-7.7700269,6.0300137],[-7.770255,6.028936],[-7.7710024,6.0283642],[-7.7726439,6.0278201],[-7.7768707,6.0253834],[-7.7802829,6.0228989],[-7.7814779,6.0224235],[-7.785989,6.0218779],[-7.7876173,6.021442],[-7.7887512,6.0200636],[-7.7904135,6.0149207],[-7.7901626,6.013236],[-7.7892829,6.0117363],[-7.7880867,6.0110476],[-7.784296,6.0099531],[-7.7833501,6.0095417],[-7.7829022,6.0089848],[-7.7829022,6.008203],[-7.7835686,6.0071187],[-7.7837598,6.0060409],[-7.7830243,6.0036638],[-7.7830243,6.0027993],[-7.7835436,6.0019385],[-7.7849114,6.0011696],[-7.7872713,6.0005077],[-7.7899012,6.0002035],[-7.7912174,5.9997048],[-7.7922312,5.9986967],[-7.7936464,5.9934339],[-7.7936464,5.9919443],[-7.7923584,5.9882842],[-7.7899639,5.9828],[-7.788355,5.9809537],[-7.7861343,5.9796653],[-7.7844081,5.9790522],[-7.7807748,5.9783844],[-7.774113,5.9773561],[-7.7676579,5.9761843],[-7.7657912,5.9755836],[-7.7639286,5.9741671],[-7.7631355,5.9729832],[-7.7625953,5.9709877],[-7.7628649,5.9693409],[-7.7633613,5.9682017],[-7.7649378,5.9668688],[-7.7655422,5.9650253],[-7.7653842,5.9601554],[-7.7649898,5.9559959],[-7.7643107,5.9539303],[-7.7631649,5.9526988],[-7.7615201,5.9524347],[-7.7592206,5.9522021],[-7.7515477,5.9475686],[-7.7496331,5.9455089],[-7.7464212,5.9415741],[-7.7453246,5.9389251],[-7.743078,5.9344953],[-7.7418848,5.9328733],[-7.7407,5.9319668],[-7.7393749,5.9318825],[-7.738787,5.9331613],[-7.7375731,5.9348877],[-7.7358336,5.9353374],[-7.7284413,5.9323323],[-7.7265524,5.9297704],[-7.7234547,5.9285722],[-7.7203761,5.9255101],[-7.7169913,5.9228167],[-7.7176732,5.9202814],[-7.7157391,5.9176581],[-7.7114327,5.9157733],[-7.7038731,5.9102428],[-7.7011337,5.9079675],[-7.6981902,5.9046781],[-7.6971572,5.9039109],[-7.6952565,5.9037441],[-7.6942564,5.9032602],[-7.688137,5.8981968],[-7.6867243,5.8976592],[-7.6850297,5.8982062],[-7.6835562,5.899513],[-7.6815807,5.900376],[-7.6801952,5.9021199],[-7.6787577,5.9031633],[-7.677315,5.9039362],[-7.6766681,5.9054124],[-7.6764494,5.9069699],[-7.6776331,5.9098712],[-7.6802331,5.9126178],[-7.6838302,5.9146623],[-7.6851763,5.9166708],[-7.6855153,5.9193683],[-7.6853064,5.9219943],[-7.6856347,5.9234543],[-7.6871176,5.9242906],[-7.6882293,5.9257394],[-7.6885648,5.9277274],[-7.6878612,5.9288819],[-7.6867203,5.929555],[-7.6858992,5.9295322],[-7.6846813,5.9290761],[-7.6826475,5.9288699],[-7.6806303,5.9293391],[-7.6787692,5.9309119],[-7.6766745,5.9330553],[-7.6761135,5.9351275],[-7.6759174,5.9393041],[-7.6755309,5.9413516],[-7.6744854,5.9440016],[-7.6719855,5.9463919],[-7.6700912,5.9485578],[-7.6679275,5.95168],[-7.6665526,5.9527908],[-7.6649851,5.953183],[-7.6634454,5.9527394],[-7.6623916,5.9517021],[-7.6621963,5.9502712],[-7.6626074,5.9492331],[-7.6637495,5.9474872],[-7.6638717,5.9452544],[-7.6634193,5.9434921],[-7.6625525,5.942539],[-7.6614835,5.9420259],[-7.6604408,5.9414398],[-7.6595464,5.9405947],[-7.6587322,5.9387501],[-7.6580929,5.935662],[-7.6580018,5.933123],[-7.6582253,5.9319228],[-7.6601494,5.9292342],[-7.6624119,5.9230344],[-7.6624119,5.920326],[-7.6627803,5.9169817],[-7.6624072,5.9147543],[-7.6618824,5.9139001],[-7.6610118,5.9131786],[-7.6597622,5.9132263],[-7.658384,5.9136991],[-7.656352,5.916547],[-7.6544903,5.9179923],[-7.652767,5.9187591],[-7.65183,5.9189367],[-7.6507227,5.9188045],[-7.6492842,5.9178209],[-7.6452578,5.9132585],[-7.6434659,5.9110955],[-7.6430383,5.9102034],[-7.6429132,5.9080302],[-7.6423487,5.9074478],[-7.6414756,5.9074074],[-7.6381613,5.9086062],[-7.6366966,5.9101626],[-7.6354322,5.9100555],[-7.6348908,5.9097623],[-7.6339947,5.9080722],[-7.6332704,5.9072296],[-7.6325118,5.9069194],[-7.6316544,5.9069582],[-7.6288713,5.9073259],[-7.6269046,5.9081787],[-7.6256398,5.9082466],[-7.6201253,5.9048624],[-7.6189456,5.9048197],[-7.6179039,5.9053779],[-7.6180586,5.9069754],[-7.6177096,5.9072816],[-7.6167168,5.9071957],[-7.6152897,5.9064859],[-7.613894,5.9043364],[-7.6135758,5.901533],[-7.6135758,5.8997677],[-7.6140819,5.8974796],[-7.6139876,5.8959329],[-7.6134563,5.8950202],[-7.6126243,5.8945334],[-7.6118511,5.8945846],[-7.6107779,5.8962554],[-7.6094363,5.8971451],[-7.6083846,5.8973194],[-7.6069592,5.8967435],[-7.6056035,5.8954848],[-7.6043789,5.8936906],[-7.604308,5.891528],[-7.6040738,5.8901294],[-7.6030539,5.8883014],[-7.6017686,5.8878106],[-7.6005731,5.8881528],[-7.5989114,5.8901094],[-7.5980224,5.8922039],[-7.5979897,5.894773],[-7.5977499,5.8963135],[-7.59707,5.8974854],[-7.595153,5.8983068],[-7.5927837,5.8985263],[-7.590647,5.8988579],[-7.5881251,5.8993495],[-7.5865978,5.8992701],[-7.5838943,5.8976294],[-7.5814855,5.8967489],[-7.5800816,5.8945426],[-7.5731658,5.8883086],[-7.5708296,5.8860493],[-7.5696051,5.8847671],[-7.5673997,5.8809603],[-7.5651142,5.8777773],[-7.5580911,5.872279],[-7.5561549,5.8702887],[-7.5545467,5.8676652],[-7.5543595,5.8666094],[-7.5546644,5.8655781],[-7.555973,5.8649582],[-7.5576926,5.8647048],[-7.5596927,5.8651594],[-7.5625789,5.8658834],[-7.5641159,5.8671068],[-7.5664641,5.8693242],[-7.5681601,5.8701525],[-7.5695238,5.8703397],[-7.570749,5.8702312],[-7.572094,5.8699678],[-7.5744013,5.8687706],[-7.5763931,5.8665721],[-7.5765873,5.8654632],[-7.5758419,5.8646424],[-7.5733773,5.8642553],[-7.5712956,5.8647763],[-7.5691046,5.8653957],[-7.5670482,5.8655961],[-7.5652933,5.8651233],[-7.5637669,5.8632187],[-7.5632702,5.8620957],[-7.5628302,5.8599397],[-7.5619671,5.8579349],[-7.5609216,5.854798],[-7.5602984,5.8521845],[-7.5597447,5.8489726],[-7.5592943,5.8467017],[-7.558599,5.8456051],[-7.5571281,5.8446025],[-7.555537,5.8441229],[-7.5539438,5.8427354],[-7.5531645,5.8416158],[-7.5525442,5.8395723],[-7.551295,5.8371872],[-7.5508784,5.8359757],[-7.5504547,5.8329981],[-7.5500968,5.8318144],[-7.5494655,5.831155],[-7.5486246,5.8310335],[-7.547652,5.8315152],[-7.5460552,5.8326564],[-7.5451392,5.8344567],[-7.5438627,5.8365669],[-7.5430336,5.8385027],[-7.5430336,5.8399494],[-7.5435629,5.8413887],[-7.5449259,5.8441893],[-7.5453692,5.8458623],[-7.5450916,5.8466748],[-7.5443519,5.846838],[-7.5416614,5.8461575],[-7.5387473,5.8456514],[-7.5360511,5.8460213],[-7.5340411,5.8469513],[-7.5329578,5.8482164],[-7.532497,5.8494541],[-7.5284221,5.8550109],[-7.5262843,5.857047],[-7.5252632,5.8574445],[-7.5238616,5.8574894],[-7.5223285,5.8573997],[-7.5207306,5.8564913],[-7.5192387,5.856074],[-7.5165856,5.8558464],[-7.5153315,5.8551781],[-7.5144857,5.8543367],[-7.5139373,5.8528365],[-7.5129736,5.8515125],[-7.512249,5.8493051],[-7.5123403,5.8445371],[-7.5127923,5.8429635],[-7.513602,5.841621],[-7.5147224,5.8407739],[-7.5162985,5.8401916],[-7.5190461,5.8401916],[-7.5207795,5.8398654],[-7.5219708,5.8389647],[-7.5223099,5.8380968],[-7.5223099,5.8370727],[-7.5216508,5.8364673],[-7.519834,5.8364197],[-7.5182595,5.8374333],[-7.5170102,5.8377439],[-7.5153016,5.8374756],[-7.5112637,5.8354214],[-7.5073164,5.8343711],[-7.5058316,5.833476],[-7.5052119,5.8325953],[-7.5049016,5.8313605],[-7.5054467,5.8294173],[-7.5057733,5.8276997],[-7.505532,5.8267395],[-7.5038571,5.8248417],[-7.5030929,5.8241765],[-7.5022799,5.8240754],[-7.5010202,5.8251893],[-7.5002443,5.8254466],[-7.499525,5.8252361],[-7.4989097,5.8244929],[-7.4977621,5.8221639],[-7.4967374,5.8208202],[-7.4935465,5.8182898],[-7.4886269,5.8161857],[-7.4869461,5.8150559],[-7.4845998,5.8124012],[-7.4835489,5.8118309],[-7.4810521,5.811877],[-7.4776896,5.8111896],[-7.4766733,5.8113822],[-7.4759869,5.812065],[-7.475655,5.8134331],[-7.4757926,5.8161706],[-7.4751493,5.8180449],[-7.4753803,5.8220444],[-7.4757468,5.8251431],[-7.4755212,5.8269828],[-7.4720443,5.8327173],[-7.4703811,5.8348316],[-7.4700967,5.8359163],[-7.4700967,5.8371986],[-7.4714891,5.8389993],[-7.4724008,5.8409945],[-7.4729421,5.8426099],[-7.4726286,5.844347],[-7.4701524,5.8483155],[-7.4695481,5.8499806],[-7.4692703,5.8518225],[-7.4690412,5.8547854],[-7.4673044,5.8604231],[-7.4659583,5.8621193],[-7.4654091,5.8622874],[-7.4644564,5.8622444],[-7.4639567,5.8617472],[-7.4636806,5.860191],[-7.4630791,5.8596423],[-7.461933,5.8594998],[-7.4591252,5.8597288],[-7.4571309,5.8596838],[-7.4558808,5.8591063],[-7.4535246,5.8568096],[-7.452831,5.856711],[-7.4514469,5.8569959],[-7.4507624,5.8577742],[-7.4504805,5.8592235],[-7.4503911,5.8602459],[-7.4496532,5.8610662],[-7.4482244,5.8614659],[-7.4465981,5.8615109],[-7.445583,5.8612474],[-7.4450305,5.8606979],[-7.4448987,5.8596928],[-7.4450367,5.8581832],[-7.444844,5.8569851],[-7.4430723,5.8557329],[-7.4423216,5.8548983],[-7.4420024,5.851678],[-7.4415298,5.8499854],[-7.4366417,5.8469577],[-7.4360651,5.8462076],[-7.4352391,5.8440624],[-7.4344295,5.8428778],[-7.4333109,5.8425875],[-7.4318515,5.8429153],[-7.4283575,5.844516],[-7.4263965,5.8450604],[-7.4251354,5.8452396],[-7.4243652,5.8450693],[-7.4240406,5.8446253],[-7.4240406,5.84322],[-7.4224758,5.8397406],[-7.4223443,5.8386935],[-7.4226267,5.8382118],[-7.4232577,5.8380444],[-7.4238481,5.8380864],[-7.4242614,5.8384565],[-7.4245851,5.8393764],[-7.4252845,5.8398734],[-7.4288206,5.8396882],[-7.4305583,5.8393144],[-7.4313827,5.8384944],[-7.4319885,5.8356202],[-7.4319885,5.8310757],[-7.4314369,5.8280118],[-7.4312534,5.8225821],[-7.4312534,5.8215071],[-7.4317451,5.8203065],[-7.4330773,5.818707],[-7.4336406,5.8173527],[-7.4339617,5.8137926],[-7.4366641,5.8086888],[-7.4387739,5.8039892],[-7.4396678,5.8028331],[-7.4413912,5.8021563],[-7.4423515,5.8016786],[-7.4426515,5.8008331],[-7.442226,5.79914],[-7.4400839,5.795966],[-7.4404546,5.7947302],[-7.4402683,5.7930793],[-7.4399837,5.7910932],[-7.4370481,5.789609],[-7.4334317,5.7893913],[-7.4326049,5.788915],[-7.4318936,5.7876325],[-7.4316668,5.7856464],[-7.4315748,5.7808411],[-7.4312463,5.7794404],[-7.4295463,5.7769719],[-7.4286478,5.7732318],[-7.428534,5.7714572],[-7.4287922,5.7705282],[-7.4309313,5.7672303],[-7.4317569,5.7663912],[-7.4335387,5.7659019],[-7.4360752,5.7640707],[-7.4382427,5.761399],[-7.44183,5.7600364],[-7.4434887,5.7587438],[-7.4441792,5.7568994],[-7.4437741,5.7546884],[-7.4409222,5.7507095],[-7.4398246,5.7496629],[-7.437513,5.7453239],[-7.435666,5.7414227],[-7.4349171,5.7385737],[-7.4346071,5.7364273],[-7.435195,5.7343959],[-7.4347539,5.7322346],[-7.4357878,5.7278979],[-7.4337876,5.7248581],[-7.4342059,5.7207362],[-7.4337767,5.7188733],[-7.4343447,5.7151092],[-7.4352153,5.7143629],[-7.4352934,5.7134931],[-7.4332444,5.712891],[-7.4317932,5.7116193],[-7.4296931,5.7107496],[-7.429768,5.7077155],[-7.4322099,5.7054255],[-7.4321407,5.7022041],[-7.4297369,5.6994995],[-7.4307948,5.6957712],[-7.4228415,5.6941592],[-7.4191646,5.6950672],[-7.4177866,5.6940498],[-7.4176859,5.6914094],[-7.416754,5.6901758],[-7.4168032,5.6886129],[-7.41738,5.6875872],[-7.4202817,5.6858805],[-7.4204781,5.6822498],[-7.4187791,5.6795409],[-7.4186173,5.6775667],[-7.4161985,5.6760741],[-7.4136868,5.6728691],[-7.4113552,5.6720391],[-7.411242,5.6691274],[-7.411479,5.6608172],[-7.4095476,5.6576697],[-7.4095014,5.6539418],[-7.4055273,5.6503928],[-7.40366,5.6488737],[-7.4022371,5.6459093],[-7.3990828,5.641595],[-7.3955945,5.639211],[-7.3972529,5.6343395],[-7.3962206,5.6323971],[-7.3966227,5.6306832],[-7.3982087,5.6283702],[-7.3974423,5.6275928],[-7.3962923,5.6270345],[-7.395131,5.6274432],[-7.3933609,5.629445],[-7.3912936,5.6307081],[-7.3875518,5.6303814],[-7.3834829,5.6273218],[-7.3799089,5.6273743],[-7.3786239,5.6250777],[-7.3761442,5.6225185],[-7.3776622,5.6198157],[-7.3776691,5.6185927],[-7.3752708,5.6146661],[-7.3753473,5.6132182],[-7.3773772,5.6110066],[-7.3797379,5.6078541],[-7.3792071,5.6026108],[-7.3794378,5.6003659],[-7.3803766,5.5981858],[-7.3803766,5.5957544],[-7.3770308,5.5900311],[-7.3729767,5.5838236],[-7.3724803,5.5824827],[-7.3736241,5.5799925],[-7.3745225,5.5795798],[-7.3757964,5.5796502],[-7.3791715,5.5816219],[-7.3812632,5.5822166],[-7.3837975,5.5819941],[-7.3865113,5.5810451],[-7.3888359,5.581262],[-7.3909087,5.5817777],[-7.3930225,5.5814772],[-7.3951268,5.5794577],[-7.3958045,5.5772094],[-7.3938144,5.5676727],[-7.393865,5.5636906],[-7.3942012,5.5608129],[-7.3928616,5.5583616],[-7.3932953,5.5555562],[-7.394157,5.5539122],[-7.396938,5.5522368],[-7.3980827,5.5511734],[-7.3980827,5.5480375],[-7.3975536,5.5462317],[-7.3945107,5.5440156],[-7.3912093,5.5412407],[-7.388408,5.5377922],[-7.3817021,5.5336114],[-7.3808521,5.5329062],[-7.380569,5.531568],[-7.381374,5.5263957],[-7.3825377,5.5232105],[-7.3840448,5.5220675],[-7.3895362,5.5203185],[-7.3912615,5.5201753],[-7.396765,5.5229509],[-7.4008475,5.5239853],[-7.4032455,5.5234631],[-7.4043985,5.5226981],[-7.4047869,5.5212285],[-7.4134704,5.5114814],[-7.422119,5.509772],[-7.4315956,5.5108353],[-7.4357812,5.5126657],[-7.4385275,5.5153005],[-7.4416355,5.5170195],[-7.4457387,5.5167013],[-7.4609966,5.5173803],[-7.4777097,5.5168456],[-7.4906767,5.5165899],[-7.501878,5.5307655],[-7.5174535,5.5299596],[-7.5287945,5.5307057],[-7.5360813,5.5294079],[-7.5496941,5.5289626],[-7.5790768,5.5296017],[-7.6144494,5.5303693],[-7.6220474,5.5311693],[-7.6417503,5.530736],[-7.6464445,5.5311955],[-7.6705213,5.5335528],[-7.6835534,5.533063],[-7.6857678,5.5329797],[-7.6887747,5.532935],[-7.6919574,5.5353353],[-7.6954013,5.5351609],[-7.7129054,5.5351991],[-7.7180459,5.5352103],[-7.722585,5.5352201],[-7.7524875,5.5356472],[-7.7724237,5.5353254],[-7.7820097,5.5447881],[-7.7853599,5.5478982],[-7.7850594,5.549017],[-7.7867813,5.5564161],[-7.7897556,5.5616872],[-7.7916458,5.571861],[-7.7976435,5.5891613],[-7.7982506,5.5901532],[-7.8009142,5.5947337],[-7.8045755,5.5969096],[-7.8231203,5.5983683],[-7.8497526,5.5986603],[-7.8632431,5.6011993],[-7.8850973,5.6020791],[-7.8893477,5.6020872],[-7.8988321,5.6021051],[-7.9443505,5.6009763],[-7.9652808,5.6004557],[-7.9661955,5.600433],[-7.9863772,5.6021433],[-7.9929217,5.6013467],[-8.0064347,5.599701],[-8.010958,5.5992343],[-8.0183675,5.6021972],[-8.0285676,5.6033205],[-8.0358238,5.6038594],[-8.039136,5.6046026],[-8.0420112,5.6058403],[-8.0452806,5.602264],[-8.0605684,5.5857871],[-8.0630294,5.5831272],[-8.0630343,5.5801004],[-8.0605846,5.5770697],[-8.0589674,5.5770671],[-8.0579405,5.5770655],[-8.0530318,5.5768682],[-8.0500121,5.5757282],[-8.0479367,5.574779],[-8.0488846,5.5726996],[-8.0502106,5.5698638],[-8.0554122,5.5642913],[-8.0567083,5.5543074],[-8.0577262,5.5539692],[-8.0820288,5.545895],[-8.0894261,5.543437],[-8.1016922,5.5427915],[-8.1032859,5.5425401],[-8.1388799,5.5407974],[-8.1485193,5.5403251],[-8.1996294,5.5388722],[-8.2007242,5.5387454],[-8.2403265,5.5341463],[-8.2411544,5.5340501],[-8.2420485,5.5333056],[-8.2465209,5.5295811],[-8.2469452,5.5272879],[-8.2499412,5.519768],[-8.2502368,5.5148661],[-8.2502973,5.5088593],[-8.247065,5.500272],[-8.2498807,5.5000194],[-8.250227,5.4960867],[-8.2486062,5.4959993],[-8.2465591,5.4952272],[-8.2450374,5.4937946],[-8.250031,5.4952308],[-8.2596044,5.5006691],[-8.2716841,5.5006839],[-8.2779251,5.5065351],[-8.2821697,5.5112095],[-8.2875526,5.517137],[-8.2884564,5.5181326],[-8.2896741,5.5171526],[-8.2908932,5.5158961],[-8.293411,5.5133007],[-8.2943473,5.5106525],[-8.2943084,5.5092153],[-8.3080883,5.5112046],[-8.3114499,5.5116896],[-8.3252925,5.5112583],[-8.3319607,5.5110504],[-8.3447629,5.5106508],[-8.3609584,5.5101448],[-8.3657172,5.5170271],[-8.3933398,5.5569712],[-8.4008252,5.567795],[-8.4118568,5.5906952],[-8.4247342,5.6174697],[-8.413529,5.6414621],[-8.4098872,5.6453306],[-8.409127,5.6448431],[-8.4087219,5.6447036],[-8.4076624,5.6443384],[-8.404632,5.6457516],[-8.4033746,5.6463377],[-8.4006442,5.6464129],[-8.3887911,5.6467398],[-8.381706,5.6484024],[-8.3807424,5.6554866],[-8.3796793,5.6633062],[-8.3796064,5.6638438],[-8.3791949,5.6660986],[-8.3787992,5.6682647],[-8.37793,5.6730247],[-8.3737551,5.6805334],[-8.3702087,5.6849123],[-8.3677141,5.6864988],[-8.3610354,5.6907458],[-8.3568357,5.6969014],[-8.3547751,5.6999215],[-8.3555006,5.7022561],[-8.3535103,5.712816],[-8.3526598,5.7278413],[-8.3509841,5.7357698],[-8.3506944,5.7408939],[-8.350559,5.7432824],[-8.350969,5.7491265],[-8.354101,5.7517839],[-8.3537635,5.7567017],[-8.3584452,5.7713002],[-8.360307,5.7831981],[-8.360712,5.7940508],[-8.3627289,5.8011523],[-8.3632024,5.802819],[-8.36369,5.8033832],[-8.3654992,5.8054782],[-8.3678672,5.8082212],[-8.3686137,5.8090859],[-8.3722335,5.8109901],[-8.3773609,5.8136869],[-8.3898577,5.8195442],[-8.4011266,5.8286921],[-8.4123963,5.834923],[-8.4134001,5.8354781],[-8.426512,5.8412872],[-8.4360717,5.8480124],[-8.4444774,5.8520869],[-8.4540057,5.8567583],[-8.4659975,5.8591694],[-8.4731749,5.8613681],[-8.4775556,5.85699],[-8.4799271,5.8548347],[-8.4821443,5.85282],[-8.4838433,5.8525598],[-8.4875638,5.85199],[-8.4871512,5.8469809],[-8.4862819,5.8443607],[-8.4859046,5.8432229],[-8.487144,5.8399222],[-8.4884112,5.8365469],[-8.4883686,5.8336165],[-8.4875839,5.829868],[-8.488839,5.8248599],[-8.4917808,5.8230629],[-8.49619,5.82037],[-8.5013488,5.8177756],[-8.5017639,5.8177759],[-8.5067667,5.8177803],[-8.5094977,5.8180863],[-8.5105027,5.8180069],[-8.5130215,5.8148639],[-8.5201047,5.8169568],[-8.5237098,5.8169598],[-8.5246893,5.8169606],[-8.5267792,5.8102841],[-8.5290769,5.8068384],[-8.5309516,5.804026],[-8.5367934,5.795683],[-8.5422147,5.7919304],[-8.5476336,5.7911003],[-8.5526984,5.7846284],[-8.5546756,5.7821021],[-8.555143,5.781506],[-8.5561183,5.7801753],[-8.5597322,5.775248],[-8.5735405,5.770615],[-8.5983417,5.7675709],[-8.6039662,5.7668806],[-8.6281396,5.7643922],[-8.6498172,5.7646971],[-8.6524629,5.7648248],[-8.6703671,5.7648355],[-8.6715023,5.7649113],[-8.6756497,5.7648385],[-8.6956561,5.7606753],[-8.7005522,5.7600987],[-8.7223299,5.7577675],[-8.7369178,5.7536001],[-8.7395302,5.7526401],[-8.7414311,5.7519416],[-8.755366,5.7468213],[-8.7533095,5.7447596],[-8.7518167,5.741392],[-8.7501383,5.7367149],[-8.7535019,5.7318522],[-8.7568653,5.7271773],[-8.7574274,5.7232492],[-8.7538813,5.7183841],[-8.7517349,5.7152967],[-8.7510231,5.7143792],[-8.7507057,5.71397],[-8.7491218,5.7119281],[-8.7466938,5.7126756],[-8.7438916,5.7143575],[-8.7364219,5.7137933],[-8.7366113,5.7081813],[-8.7399759,5.7008875],[-8.736615,5.7001374],[-8.733629,5.6954596],[-8.7340042,5.6920923],[-8.7369943,5.686295],[-8.742039,5.6803108],[-8.7423505,5.6795612],[-8.7776112,5.682664],[-8.7892861,5.6819375],[-8.8067967,5.6855982],[-8.8264957,5.6929137],[-8.8589125,5.6990114],[-8.8615187,5.6995015],[-8.8892449,5.7097405],[-8.9162435,5.7119378],[-8.9486409,5.7286068],[-8.9865866,5.7332868],[-9.0041002,5.7397191],[-9.0122735,5.7560918],[-9.0198637,5.7736338],[-9.0266422,5.7816747],[-9.0362118,5.7894209],[-9.0659899,5.8063757],[-9.0864263,5.815144],[-9.0898133,5.8220642],[-9.0936115,5.8289076]]]]}]}
