# Supplementary material
Source: ML conference proceedings conference paper supplement (https://proceedings.neurips.cc/paper_files/paper/2022/hash/9d3faa41886997cfc2128b930077fa49-Abstract.html)
Supplement: Supplementary file 1 [file 9d3faa41886997cfc2128b930077fa49-Supplemental-Conference.zip › code/ebola/map/geojson/grand_kru.geojson]

{"type":"GeometryCollection","geometries":[{"type":"MultiPolygon","coordinates":[[[[-8.2555591,4.5782805],[-8.2550741,4.5793354],[-8.2549335,4.5839674],[-8.2533895,4.5874764],[-8.2530245,4.5890407],[-8.252407,4.5916871],[-8.251144,4.5953367],[-8.250161,4.5973018],[-8.250863,4.6166716],[-8.2508056,4.6177624],[-8.2507228,4.6193383],[-8.2515647,4.6213033],[-8.2526877,4.6234088],[-8.2510035,4.6262161],[-8.2526878,4.6281811],[-8.2538105,4.6316901],[-8.2533445,4.6332789],[-8.2509318,4.6333063],[-8.2477753,4.6327401],[-8.2444513,4.6330094],[-8.2404089,4.6331891],[-8.2365463,4.6338179],[-8.2343006,4.6336385],[-8.2318747,4.6332791],[-8.2275631,4.6333688],[-8.2233411,4.6334586],[-8.2181309,4.6319314],[-8.2150768,4.6310334],[-8.2104949,4.6314823],[-8.2083494,4.6314259],[-8.2070817,4.6313925],[-8.2031293,4.6342672],[-8.197919,4.6392976],[-8.1943254,4.6427114],[-8.1892054,4.6441486],[-8.1846238,4.6452266],[-8.1796831,4.6474724],[-8.1729007,4.6514248],[-8.1676012,4.6525925],[-8.1615823,4.6521436],[-8.1573602,4.6517843],[-8.1569171,4.6519356],[-8.1539465,4.6529519],[-8.1495447,4.654479],[-8.1454125,4.6566351],[-8.1448029,4.6575307],[-8.1425383,4.6608571],[-8.138406,4.6640011],[-8.1331958,4.6652588],[-8.1234043,4.6690317],[-8.1190977,4.67139],[-8.1158583,4.673164],[-8.1099292,4.6765774],[-8.0946131,4.6866385],[-8.0875165,4.6923879],[-8.0852366,4.694615],[-8.0836541,4.6961608],[-8.0806897,4.6999337],[-8.080779,4.7027184],[-8.0819469,4.7067608],[-8.0829351,4.7120608],[-8.0830701,4.7161032],[-8.0807981,4.7208095],[-8.0805546,4.7213135],[-8.0775904,4.7235591],[-8.0750751,4.7247268],[-8.0708532,4.7252659],[-8.0675294,4.7276014],[-8.0620495,4.7308354],[-8.0595342,4.7323627],[-8.0428256,4.7316438],[-8.0356206,4.7312974],[-8.0334834,4.7311947],[-8.025758,4.7306558],[-8.0190206,4.7303863],[-8.0165952,4.7304761],[-8.0140798,4.7288591],[-8.0130664,4.727816],[-8.0110256,4.7257151],[-8.0077017,4.7216727],[-8.005366,4.7173607],[-8.0048274,4.7133184],[-8.0035697,4.7090065],[-8.0012338,4.704425],[-7.9982693,4.7040657],[-7.9947661,4.7021793],[-7.9938302,4.7017794],[-7.9950346,4.700437],[-8.0015254,4.6967282],[-8.0116409,4.6902372],[-8.0160245,4.6871183],[-8.0215038,4.6837464],[-8.0265614,4.6800372],[-8.0271457,4.6796259],[-8.0302709,4.677424],[-8.0356657,4.6731249],[-8.0392061,4.6688256],[-8.0421567,4.664358],[-8.0444325,4.661829],[-8.0484368,4.6552117],[-8.0509654,4.6493952],[-8.0534944,4.6436629],[-8.0582151,4.6362449],[-8.0588028,4.6353742],[-8.0604913,4.6328728],[-8.0653807,4.6290796],[-8.0689768,4.6283856],[-8.0701856,4.6281522],[-8.0754116,4.6292482],[-8.0835044,4.6321143],[-8.087162,4.6330895],[-8.0887409,4.6342813],[-8.0924362,4.6358134],[-8.0949367,4.636737],[-8.0989577,4.6382222],[-8.1040012,4.6398486],[-8.1040988,4.6401928],[-8.1072191,4.6401967],[-8.1122194,4.6412939],[-8.1147205,4.641297],[-8.1172225,4.6406457],[-8.1201619,4.6379216],[-8.1248439,4.6325811],[-8.1272982,4.6288966],[-8.1277244,4.6282569],[-8.1290516,4.6275728],[-8.1319331,4.6260869],[-8.135642,4.6238953],[-8.1413052,4.6218607],[-8.1453783,4.6203968],[-8.1528808,4.6181209],[-8.1604679,4.6157605],[-8.1657787,4.6139062],[-8.1701618,4.612726],[-8.1731965,4.6121359],[-8.1768216,4.6116299],[-8.1790976,4.6103656],[-8.1796612,4.6102345],[-8.1800099,4.6098388],[-8.1804886,4.6090589],[-8.180541,4.6085247],[-8.1787181,4.6087219],[-8.1688554,4.6077103],[-8.1640501,4.6071201],[-8.1586553,4.6057713],[-8.1545249,4.6047597],[-8.1486238,4.6027366],[-8.1458422,4.601388],[-8.1417116,4.5986903],[-8.1390983,4.5946442],[-8.1390142,4.5915251],[-8.1388453,4.5876474],[-8.137834,4.5814936],[-8.1375809,4.5755087],[-8.1375811,4.5692706],[-8.1372441,4.5664889],[-8.1376652,4.5610939],[-8.1377498,4.5577219],[-8.1376651,4.5545185],[-8.1376183,4.5529711],[-8.1401342,4.5533187],[-8.1413573,4.5534738],[-8.1423712,4.5535807],[-8.1438625,4.5537251],[-8.1475666,4.554169],[-8.1489587,4.554292],[-8.1514263,4.5545379],[-8.1529042,4.554669],[-8.1546342,4.5548],[-8.1559539,4.5549176],[-8.1568095,4.5549711],[-8.1584913,4.5550353],[-8.1603313,4.5551342],[-8.1615248,4.5552331],[-8.1626943,4.5553561],[-8.1636679,4.5555005],[-8.1657305,4.5557705],[-8.1664333,4.5558828],[-8.1673399,4.5559978],[-8.1694239,4.5560887],[-8.1705317,4.556193],[-8.1729108,4.5565326],[-8.1746998,4.5567251],[-8.175357,4.5567972],[-8.1771326,4.5570486],[-8.1795707,4.5573828],[-8.181636,4.5576475],[-8.1833687,4.5578293],[-8.185426,4.5579737],[-8.1865928,4.5580673],[-8.1872982,4.5580699],[-8.188068,4.5580512],[-8.1893179,4.557971],[-8.1903867,4.5579095],[-8.1909567,4.5579095],[-8.1917077,4.5579804],[-8.1921168,4.5579724],[-8.1923863,4.5579657],[-8.1925151,4.5579389],[-8.1926344,4.5578721],[-8.192782,4.5577691],[-8.1928705,4.5577544],[-8.1929201,4.5577839],[-8.1929469,4.5578708],[-8.1929281,4.5581662],[-8.1928664,4.5584095],[-8.1928799,4.5585646],[-8.1929442,4.558725],[-8.1930462,4.5588427],[-8.1932822,4.5590191],[-8.1934914,4.5591688],[-8.1936845,4.559364],[-8.1939688,4.5595699],[-8.1942451,4.5597196],[-8.1950471,4.5599683],[-8.1961763,4.560249],[-8.1969246,4.5604201],[-8.1978714,4.5606073],[-8.1993842,4.5608479],[-8.2009318,4.5611902],[-8.201589,4.5613453],[-8.2021683,4.5614388],[-8.2034129,4.5615591],[-8.2039923,4.5616447],[-8.2049283,4.5617998],[-8.2057115,4.5619629],[-8.2067603,4.5621607],[-8.208721,4.5625618],[-8.2100219,4.5628479],[-8.2107595,4.5629789],[-8.2116875,4.5631099],[-8.2125163,4.563265],[-8.2137769,4.563511],[-8.2146218,4.5637222],[-8.2157269,4.5639494],[-8.2169741,4.5642649],[-8.2179236,4.5644855],[-8.2183984,4.5645136],[-8.2185955,4.5644895],[-8.2188195,4.5644053],[-8.218971,4.5643746],[-8.2191159,4.5643906],[-8.2192929,4.5644735],[-8.2193519,4.5644855],[-8.2194807,4.5644962],[-8.2195169,4.5645076],[-8.2195424,4.5645323],[-8.2196054,4.5646874],[-8.2197583,4.5650564],[-8.2199675,4.5653291],[-8.2204905,4.5658103],[-8.2206568,4.5659253],[-8.2211584,4.5661178],[-8.221719,4.5663932],[-8.222183,4.5666766],[-8.2225156,4.5669386],[-8.222883,4.5671739],[-8.2234088,4.5674226],[-8.2242349,4.5676926],[-8.2249108,4.5679038],[-8.2254687,4.5680455],[-8.2261875,4.568206],[-8.2273409,4.5685268],[-8.2280034,4.5686926],[-8.2284406,4.5687781],[-8.2297173,4.5689733],[-8.2305971,4.5691872],[-8.2310061,4.5692808],[-8.2313615,4.5693837],[-8.2315224,4.5694679],[-8.2318406,4.5696778],[-8.232001,4.5697719],[-8.2322373,4.5698757],[-8.2324746,4.5699639],[-8.2329118,4.5700615],[-8.2335126,4.5701283],[-8.2341349,4.5702193],[-8.2352373,4.5704438],[-8.236683,4.5707192],[-8.2384157,4.5710641],[-8.2397273,4.5713796],[-8.2407519,4.5716042],[-8.2421976,4.571917],[-8.2429165,4.5721283],[-8.244051,4.572401],[-8.2450086,4.5724999],[-8.2461673,4.5725721],[-8.2465991,4.5725828],[-8.2478759,4.5725186],[-8.2488549,4.5725748],[-8.2494772,4.5726871],[-8.2500204,4.5728516],[-8.2504562,4.5730052],[-8.2514057,4.5734704],[-8.2527441,4.574195],[-8.2529936,4.5743662],[-8.2531974,4.5745212],[-8.253471,4.5747565],[-8.2537097,4.5748648],[-8.2539189,4.5748875],[-8.2539792,4.5748714],[-8.2540262,4.5748287],[-8.2541321,4.5747952],[-8.2542421,4.5747979],[-8.2544179,4.5748782],[-8.2544902,4.5749423],[-8.2545224,4.5750399],[-8.2545251,4.5751228],[-8.2545412,4.5751869],[-8.2545935,4.5752658],[-8.254627,4.5753647],[-8.254623,4.5754784],[-8.2544942,4.575842],[-8.2544506,4.5758834],[-8.2544038,4.5758969],[-8.2543507,4.5758948],[-8.2542428,4.5758159],[-8.2541496,4.5757912],[-8.2540382,4.5758219],[-8.2539485,4.5759009],[-8.2538961,4.5759971],[-8.2538478,4.5761668],[-8.2538317,4.5764476],[-8.2538652,4.5766334],[-8.2539591,4.5768499],[-8.254053,4.5770037],[-8.2543829,4.577374],[-8.2549328,4.5778325],[-8.2555591,4.5782805]]]]}]}
