# Supplementary material
Source: ML conference proceedings conference paper supplement (https://proceedings.neurips.cc/paper_files/paper/2022/hash/9d3faa41886997cfc2128b930077fa49-Abstract.html)
Supplement: Supplementary file 1 [file 9d3faa41886997cfc2128b930077fa49-Supplemental-Conference.zip › code/ebola/map/geojson/gueckedou.geojson]

{"type":"GeometryCollection","geometries":[{"type":"MultiPolygon","coordinates":[[[[-10.6854088,8.2865024],[-10.6857501,8.2925901],[-10.6866148,8.2974293],[-10.685096,8.3041783],[-10.6847831,8.3096608],[-10.6829669,8.31541],[-10.6803411,8.3159121],[-10.6791222,8.3153875],[-10.6770489,8.3152334],[-10.6760944,8.3181448],[-10.6755631,8.3231643],[-10.6730914,8.3270706],[-10.6732091,8.32894],[-10.6734193,8.332204],[-10.6725102,8.3339291],[-10.6693338,8.337437],[-10.6670389,8.3393176],[-10.6661453,8.3398038],[-10.6659036,8.3403569],[-10.6659722,8.3418837],[-10.6655484,8.3438676],[-10.6655648,8.3442534],[-10.665458,8.3447989],[-10.6649903,8.3456904],[-10.6646005,8.3458875],[-10.6635679,8.3459328],[-10.6631955,8.3468097],[-10.6631152,8.3477735],[-10.6629065,8.3489037],[-10.6590222,8.3502889],[-10.6574834,8.3505092],[-10.651665,8.3511556],[-10.6486728,8.3526848],[-10.6446893,8.3532351],[-10.6426503,8.3544491],[-10.6408767,8.3537443],[-10.6392606,8.3536926],[-10.6384869,8.3524816],[-10.6380786,8.3508722],[-10.6386857,8.3488792],[-10.6385196,8.34757],[-10.6381022,8.3445333],[-10.6372537,8.3427868],[-10.6366779,8.3421797],[-10.6358184,8.3420099],[-10.6353971,8.3420469],[-10.6347752,8.3423298],[-10.6335857,8.3430729],[-10.6318578,8.3467503],[-10.6306203,8.3468941],[-10.6297647,8.3475787],[-10.6275683,8.3501773],[-10.6246029,8.3515192],[-10.6238543,8.3512209],[-10.6234119,8.3507435],[-10.6233313,8.3493773],[-10.6243138,8.3462824],[-10.6231402,8.3441048],[-10.6224762,8.3431458],[-10.6192294,8.339899],[-10.6166669,8.3380884],[-10.6125443,8.3377403],[-10.6094803,8.3389068],[-10.6059269,8.3409047],[-10.6046351,8.3408789],[-10.6039822,8.3398952],[-10.6001494,8.3395559],[-10.5959567,8.3377059],[-10.5922483,8.337641],[-10.5874582,8.3374463],[-10.5858027,8.3374209],[-10.5814301,8.3337155],[-10.5772851,8.3340512],[-10.5769546,8.3335325],[-10.5760256,8.3290134],[-10.5743933,8.323879],[-10.5734199,8.3172864],[-10.5723139,8.3145628],[-10.5723755,8.3118645],[-10.5724262,8.3089217],[-10.5703406,8.3086854],[-10.5677347,8.3074485],[-10.5671014,8.3075126],[-10.5658931,8.3088847],[-10.5615881,8.3117726],[-10.5603245,8.311813],[-10.5588075,8.3092284],[-10.5571789,8.3086261],[-10.5562283,8.3056151],[-10.55253,8.3083754],[-10.5485688,8.3097299],[-10.5424925,8.3092041],[-10.5405431,8.3118034],[-10.5366277,8.3141573],[-10.5289369,8.3192237],[-10.5242655,8.3232446],[-10.5201763,8.3260432],[-10.5175531,8.328042],[-10.511183,8.3337497],[-10.5085963,8.3345254],[-10.5068145,8.3368852],[-10.5034113,8.3405368],[-10.4982326,8.3421748],[-10.496332,8.3446318],[-10.4932964,8.347315],[-10.4907614,8.3500564],[-10.4891657,8.3531915],[-10.4868169,8.35793],[-10.4834021,8.3604096],[-10.4797637,8.3629047],[-10.4790133,8.3645246],[-10.482053,8.3664157],[-10.4823213,8.3696851],[-10.4812269,8.3719565],[-10.4782165,8.3767155],[-10.4750379,8.3792583],[-10.4710687,8.3803346],[-10.4692274,8.3809935],[-10.4678744,8.3819323],[-10.4655371,8.3840042],[-10.4634643,8.3855756],[-10.4629548,8.3899021],[-10.4615377,8.390413],[-10.4568252,8.3904267],[-10.454726,8.3908689],[-10.4497925,8.3942004],[-10.4474266,8.3971183],[-10.4463476,8.3989767],[-10.4443382,8.4003301],[-10.4407711,8.403512],[-10.4382996,8.4046159],[-10.4371017,8.4062051],[-10.4339959,8.4100681],[-10.4311495,8.4116386],[-10.4292496,8.4155424],[-10.4286806,8.4181346],[-10.4265369,8.4203481],[-10.4249247,8.4245399],[-10.4229972,8.4283949],[-10.4194506,8.4335535],[-10.4162727,8.436817],[-10.4127403,8.441233],[-10.4093096,8.4411243],[-10.4069303,8.4425241],[-10.4030132,8.4457884],[-10.3994479,8.4496777],[-10.3943001,8.4576305],[-10.3936959,8.4606995],[-10.394001,8.4631763],[-10.3943695,8.4647763],[-10.3939966,8.4665881],[-10.3940503,8.4676735],[-10.393735,8.4688409],[-10.3930851,8.4709843],[-10.3906092,8.4742139],[-10.3900479,8.4765406],[-10.3899394,8.4773595],[-10.3896121,8.4781545],[-10.3889974,8.4790071],[-10.3889574,8.4796474],[-10.3893102,8.4802734],[-10.3895356,8.4809963],[-10.3892884,8.4816584],[-10.3883173,8.4826512],[-10.3877534,8.4836368],[-10.3871861,8.4861478],[-10.3866841,8.4872198],[-10.3857931,8.4881839],[-10.3845637,8.4888135],[-10.3840253,8.4891984],[-10.3836759,8.4903794],[-10.3832362,8.4907204],[-10.3826472,8.4909976],[-10.382053,8.490906],[-10.380353,8.4901728],[-10.3796295,8.4896434],[-10.3793276,8.4888665],[-10.3782945,8.4861036],[-10.376716,8.4830927],[-10.3752904,8.4808192],[-10.3751776,8.4804145],[-10.3751994,8.480026],[-10.3751158,8.4798749],[-10.3749375,8.479882],[-10.3712119,8.4835261],[-10.3685146,8.4860925],[-10.3678599,8.4864918],[-10.3664159,8.4868337],[-10.3645392,8.4867366],[-10.3632225,8.4864092],[-10.3622842,8.4865963],[-10.3614149,8.4865962],[-10.3588765,8.4854486],[-10.3582218,8.4847113],[-10.3581236,8.4841285],[-10.3584328,8.4832327],[-10.3582945,8.4829557],[-10.3579272,8.4828191],[-10.3572943,8.482837],[-10.3565269,8.483078],[-10.3559268,8.4837436],[-10.3550357,8.4862544],[-10.3546938,8.4878877],[-10.353799,8.4888948],[-10.3524096,8.4894201],[-10.3505256,8.4899237],[-10.3481833,8.4912403],[-10.3453894,8.4935977],[-10.3443968,8.4939896],[-10.343171,8.494466],[-10.3419072,8.4936487],[-10.3403126,8.4936842],[-10.3392273,8.4940506],[-10.3382036,8.4949052],[-10.3369697,8.4974867],[-10.3358442,8.499084],[-10.3347958,8.4998778],[-10.3334485,8.5004166],[-10.33182,8.5006656],[-10.3294769,8.501158],[-10.3281707,8.5019229],[-10.3272627,8.5025601],[-10.3263371,8.5039504],[-10.3251473,8.5053482],[-10.3247145,8.5058564],[-10.3239121,8.5063606],[-10.3230862,8.5063953],[-10.3222133,8.5061519],[-10.3197004,8.5041997],[-10.3176811,8.5025699],[-10.314955,8.5007426],[-10.3127363,8.4997682],[-10.3106331,8.4992451],[-10.3095944,8.4988229],[-10.3086379,8.4983032],[-10.3084901,8.4978322],[-10.3081206,8.4973043],[-10.3070124,8.4969511],[-10.304678,8.4968558],[-10.3038951,8.4968238],[-10.3025248,8.4965595],[-10.3025087,8.4953839],[-10.3018516,8.4940007],[-10.3015411,8.4920253],[-10.3012537,8.4916262],[-10.3008297,8.4914998],[-10.2993783,8.4914884],[-10.298654,8.4914152],[-10.2968472,8.4930305],[-10.294763,8.4934463],[-10.2935321,8.4916702],[-10.2921009,8.4905655],[-10.2910423,8.4908707],[-10.2901369,8.4914144],[-10.2892059,8.4906611],[-10.2884076,8.4885844],[-10.2862055,8.4869828],[-10.2830846,8.4862027],[-10.2799137,8.4849993],[-10.2772935,8.4866117],[-10.2765267,8.4879659],[-10.2771304,8.4909376],[-10.2737238,8.4915999],[-10.2704716,8.4919826],[-10.2678079,8.4910312],[-10.2660392,8.4907975],[-10.2650636,8.4873623],[-10.2636351,8.486651],[-10.258405,8.4871019],[-10.2547763,8.4897464],[-10.2451315,8.4923909],[-10.2393064,8.4917298],[-10.238065,8.4866296],[-10.2353912,8.4863463],[-10.2317798,8.4907583],[-10.2269352,8.4938789],[-10.22455,8.491122],[-10.225069,8.4845614],[-10.2258092,8.4841263],[-10.2262813,8.483983],[-10.2268285,8.4839353],[-10.22825,8.4840945],[-10.228985,8.484121],[-10.2292813,8.4839885],[-10.2295214,8.4837231],[-10.229559,8.4834525],[-10.2293497,8.4829007],[-10.2286525,8.4819436],[-10.2265603,8.4806486],[-10.2228154,8.4804679],[-10.2186097,8.4802132],[-10.2157773,8.4813168],[-10.2131165,8.4825053],[-10.2119149,8.4814866],[-10.2098951,8.4792577],[-10.2074891,8.4790124],[-10.2050168,8.4823913],[-10.2029748,8.4825696],[-10.2011002,8.4843729],[-10.2019,8.4875537],[-10.2014096,8.4891288],[-10.2012139,8.4897719],[-10.2002419,8.4923526],[-10.1984395,8.4950691],[-10.1952637,8.4962575],[-10.1942645,8.4980056],[-10.1931156,8.4986579],[-10.1919986,8.4998573],[-10.1903498,8.5013617],[-10.1884031,8.5022635],[-10.1867134,8.5035639],[-10.1854903,8.5046886],[-10.1825205,8.5071661],[-10.1807376,8.5080729],[-10.1802336,8.5080654],[-10.1795739,8.5076531],[-10.1791484,8.5075584],[-10.1780102,8.5078845],[-10.1759007,8.5095922],[-10.1731275,8.512482],[-10.1714893,8.5131974],[-10.1693618,8.5134468],[-10.1684044,8.5138496],[-10.1673693,8.5145214],[-10.1668866,8.5147443],[-10.1663726,8.514846],[-10.1625963,8.5150775],[-10.1613304,8.5156982],[-10.1600434,8.516866],[-10.1589004,8.5183459],[-10.1585706,8.5193243],[-10.1585652,8.520129],[-10.1588525,8.5206182],[-10.159363,8.5209811],[-10.1601167,8.5211743],[-10.1605244,8.5211849],[-10.1610012,8.5212681],[-10.1629905,8.5228326],[-10.1633895,8.5234413],[-10.1633953,8.5235175],[-10.1634855,8.5238906],[-10.163448,8.5243424],[-10.1630437,8.5252154],[-10.162713,8.5256519],[-10.1622513,8.5260361],[-10.1616187,8.526437],[-10.160879,8.5267357],[-10.1600094,8.5270843],[-10.1586769,8.5274615],[-10.157475,8.5272827],[-10.1558633,8.5268197],[-10.154168,8.5258506],[-10.1530158,8.525567],[-10.1527406,8.5250771],[-10.1525599,8.5247553],[-10.1518501,8.5242678],[-10.1508792,8.5240625],[-10.149993,8.5244927],[-10.1494982,8.5247525],[-10.1480676,8.5242476],[-10.1459347,8.5242634],[-10.1441209,8.523974],[-10.1398552,8.5225117],[-10.1377703,8.5222329],[-10.1362758,8.5222751],[-10.1339727,8.5228748],[-10.1326078,8.5234236],[-10.1320393,8.5234661],[-10.1308054,8.5232963],[-10.1283241,8.5225801],[-10.1273668,8.5227275],[-10.1265529,8.5230167],[-10.1262126,8.5235638],[-10.1260633,8.5253478],[-10.1261536,8.526789],[-10.1255261,8.5274308],[-10.1245474,8.52782],[-10.1230577,8.5291887],[-10.1218466,8.5298878],[-10.1208613,8.5318741],[-10.1202143,8.534537],[-10.1198609,8.5349537],[-10.119626,8.5350843],[-10.1192891,8.5350057],[-10.1186198,8.5346933],[-10.1181991,8.5342461],[-10.1178299,8.5336816],[-10.1177472,8.5329378],[-10.1178675,8.532112],[-10.1178073,8.5314202],[-10.1159118,8.5295159],[-10.1143688,8.5285378],[-10.1137037,8.5282089],[-10.1130171,8.5280604],[-10.1117403,8.5279437],[-10.1109679,8.5277527],[-10.1104422,8.5274662],[-10.1102478,8.5272025],[-10.1094128,8.5252907],[-10.1094249,8.5246966],[-10.1094355,8.524175],[-10.1092834,8.52336],[-10.1089186,8.5226809],[-10.1082847,8.5218615],[-10.1073819,8.5209464],[-10.1048981,8.519552],[-10.103493,8.5188394],[-10.1023606,8.5177195],[-10.1013723,8.5171422],[-10.1006374,8.5158206],[-10.102016,8.5147493],[-10.1016221,8.5129964],[-10.1001803,8.5132732],[-10.0978782,8.5140695],[-10.0972898,8.5145239],[-10.0963516,8.5148558],[-10.0958652,8.5148863],[-10.0953924,8.5145022],[-10.0947442,8.5144752],[-10.0943705,8.5148993],[-10.0941369,8.5156284],[-10.0936113,8.5164009],[-10.0927654,8.5169656],[-10.0902242,8.5178664],[-10.0850852,8.519007],[-10.0832603,8.5195629],[-10.0826617,8.5195845],[-10.0821924,8.5194962],[-10.0813376,8.5188881],[-10.079035,8.5170043],[-10.0790678,8.5159756],[-10.0784328,8.5159506],[-10.0762371,8.5169546],[-10.0753908,8.5174059],[-10.074924,8.5181962],[-10.0742449,8.5177734],[-10.0732505,8.516887],[-10.0731087,8.5134445],[-10.0726809,8.5115507],[-10.0719132,8.5093033],[-10.071246,8.5090391],[-10.0704222,8.5091843],[-10.0682884,8.5106114],[-10.0671089,8.5110975],[-10.065914,8.5113567],[-10.0634571,8.5113465],[-10.0620634,8.5107367],[-10.0600561,8.5088039],[-10.0579449,8.5060646],[-10.0561031,8.5047278],[-10.0550699,8.5037567],[-10.054228,8.5031979],[-10.0532478,8.5031569],[-10.0518955,8.5027223],[-10.0501689,8.5017301],[-10.0484139,8.500903],[-10.0472671,8.5000369],[-10.0466589,8.4994558],[-10.045973,8.4986958],[-10.0456669,8.4977789],[-10.0455319,8.496687],[-10.0450519,8.4957104],[-10.0427544,8.4891385],[-10.0430244,8.4885973],[-10.0454585,8.485025],[-10.0459699,8.4831608],[-10.0466195,8.4817133],[-10.0470233,8.4805897],[-10.046886,8.4798758],[-10.0468239,8.478208],[-10.0471198,8.4771576],[-10.0482328,8.4760925],[-10.0495139,8.4752803],[-10.0500922,8.4746325],[-10.0512155,8.4721131],[-10.0521819,8.4705006],[-10.0529374,8.4696631],[-10.0538316,8.4687534],[-10.0541601,8.4681686],[-10.0543081,8.4675156],[-10.0548304,8.4664383],[-10.0555129,8.466034],[-10.0560933,8.465608],[-10.056305,8.4648371],[-10.0560823,8.4643155],[-10.0554017,8.463765],[-10.0544778,8.4634127],[-10.054581,8.4622487],[-10.0548778,8.4609365],[-10.0548856,8.4593411],[-10.0553677,8.4578536],[-10.0559655,8.4560587],[-10.0563816,8.4549612],[-10.0568664,8.4537487],[-10.0570214,8.4519759],[-10.0587576,8.4496687],[-10.0593015,8.4488239],[-10.0594723,8.4480578],[-10.0592577,8.4458671],[-10.0588927,8.4442677],[-10.0588779,8.4394791],[-10.0586482,8.4378233],[-10.0586136,8.4351022],[-10.0576736,8.432953],[-10.0573606,8.4318186],[-10.0580094,8.4296711],[-10.0585292,8.4287006],[-10.0585095,8.4279242],[-10.0580094,8.4274579],[-10.0571379,8.4272804],[-10.0560641,8.4275337],[-10.0552647,8.4270247],[-10.0520352,8.4270749],[-10.0510309,8.4274037],[-10.0505747,8.4273857],[-10.0499171,8.4275092],[-10.0481052,8.4280403],[-10.0474431,8.4281475],[-10.0470708,8.4281619],[-10.0457058,8.4283569],[-10.0456072,8.4281367],[-10.0454248,8.4280067],[-10.0445544,8.4279567],[-10.0429794,8.4281619],[-10.0415377,8.4282341],[-10.0404208,8.4282378],[-10.0394645,8.4283894],[-10.0380389,8.4286928],[-10.0373403,8.4295014],[-10.0364688,8.429984],[-10.0358183,8.4309925],[-10.0352344,8.4331299],[-10.0344959,8.433958],[-10.0329861,8.4345812],[-10.0315736,8.4348701],[-10.0292679,8.4354678],[-10.0271307,8.4342537],[-10.0259054,8.4337147],[-10.0253068,8.4330577],[-10.0249117,8.4327946],[-10.0235596,8.4330668],[-10.0210584,8.4346209],[-10.0181239,8.4362023],[-10.0161526,8.437682],[-10.0145601,8.4385363],[-10.0130388,8.4407311],[-10.0103754,8.4412326],[-10.0091678,8.4415075],[-10.0072711,8.4418366],[-10.0060197,8.4419456],[-10.0052358,8.4416486],[-10.004393,8.4413564],[-10.0016705,8.4422156],[-10.000712,8.4426798],[-10.0000116,8.4432238],[-9.9995865,8.443485],[-9.999091,8.4435759],[-9.9984397,8.443793],[-9.9979442,8.4441291],[-9.9973284,8.4446192],[-9.9963444,8.4449763],[-9.994596,8.4451444],[-9.9913043,8.4454104],[-9.9907593,8.4455436],[-9.9904903,8.4455856],[-9.9901788,8.4456065],[-9.9896764,8.4455705],[-9.988671,8.4450743],[-9.9884658,8.4451024],[-9.9879534,8.4454797],[-9.9879351,8.4459231],[-9.9879641,8.4463073],[-9.9885932,8.4470629],[-9.9887206,8.4478747],[-9.9882746,8.4496536],[-9.9880502,8.4502988],[-9.9876729,8.451117],[-9.987313,8.451782],[-9.9870628,8.4523142],[-9.986596,8.4527715],[-9.9859078,8.4531103],[-9.984609,8.4540301],[-9.9842695,8.4544658],[-9.9841149,8.4551205],[-9.983493,8.4556109],[-9.982981,8.4558447],[-9.9818968,8.4561727],[-9.9813643,8.4562059],[-9.980821,8.4564958],[-9.9801966,8.456824],[-9.9798129,8.4571611],[-9.979472,8.4576975],[-9.9787768,8.4583905],[-9.9783385,8.4588767],[-9.977741,8.4593957],[-9.9768434,8.4602611],[-9.9763245,8.4606564],[-9.9753601,8.4614077],[-9.9747722,8.46186],[-9.9738106,8.4626446],[-9.973632,8.4628943],[-9.9735199,8.4630246],[-9.9731283,8.4632537],[-9.9722054,8.4628501],[-9.9713953,8.4622626],[-9.970448,8.4620101],[-9.9697606,8.4618979],[-9.9687707,8.4621802],[-9.9675228,8.4627447],[-9.9664016,8.4633982],[-9.9655077,8.4639816],[-9.9646897,8.4648934],[-9.9641191,8.4661509],[-9.9637187,8.4672995],[-9.9635185,8.4677352],[-9.9633182,8.4681808],[-9.9632249,8.4686258],[-9.9632081,8.4687056],[-9.9628778,8.4696067],[-9.9625692,8.4701886],[-9.9620147,8.4710363],[-9.961305,8.4720041],[-9.9604531,8.4725774],[-9.9597049,8.4729944],[-9.9588791,8.4734698],[-9.9581685,8.4740176],[-9.9576589,8.4742609],[-9.9572729,8.4745967],[-9.9568458,8.475212],[-9.9564332,8.4753799],[-9.9560555,8.4753879],[-9.9556475,8.4752754],[-9.9552624,8.4754238],[-9.9547031,8.4757244],[-9.9537527,8.4766386],[-9.9528534,8.4775359],[-9.9521214,8.4780459],[-9.9511304,8.4786621],[-9.950012,8.4792222],[-9.9494386,8.4795442],[-9.9489077,8.4798313],[-9.9485679,8.4801323],[-9.9478954,8.4806364],[-9.9471663,8.4812596],[-9.9464513,8.4817357],[-9.9458992,8.4820787],[-9.9455028,8.4824498],[-9.9448586,8.4828699],[-9.9444834,8.4831079],[-9.9437826,8.483654],[-9.9429827,8.4842981],[-9.9423103,8.4847952],[-9.9422182,8.4851523],[-9.9420308,8.4854184],[-9.9419563,8.4856144],[-9.9418383,8.4859444],[-9.9415572,8.4862032],[-9.9411195,8.4865713],[-9.9397538,8.4865521],[-9.9387848,8.4862915],[-9.9379304,8.4860357],[-9.9374247,8.4859209],[-9.9371393,8.4860731],[-9.9369406,8.4858579],[-9.9368236,8.4854144],[-9.936589,8.4849891],[-9.9364394,8.484558],[-9.936187,8.4846036],[-9.9356967,8.4847712],[-9.9352365,8.4847859],[-9.9348161,8.4850807],[-9.9345961,8.4860151],[-9.9348458,8.4873613],[-9.9350632,8.4880651],[-9.9350681,8.4884429],[-9.9350512,8.4890364],[-9.9349973,8.4892296],[-9.9345734,8.4896236],[-9.9342003,8.4900639],[-9.933449,8.4904457],[-9.932992,8.4906822],[-9.9325794,8.4906782],[-9.9318302,8.4907518],[-9.9311583,8.490513],[-9.9304059,8.4907555],[-9.9298951,8.4911478],[-9.9292686,8.491634],[-9.9286603,8.4921698],[-9.9280315,8.4924877],[-9.9274425,8.4926762],[-9.9268289,8.4927906],[-9.926422,8.4929676],[-9.9259604,8.4933163],[-9.9254758,8.4938671],[-9.9252277,8.4945917],[-9.9248386,8.4953517],[-9.9242351,8.4957473],[-9.9233757,8.4959349],[-9.922473,8.4959797],[-9.9218976,8.4959555],[-9.9209275,8.4959171],[-9.9200641,8.4957305],[-9.9188844,8.4957373],[-9.918268,8.4960051],[-9.9177298,8.4964016],[-9.9169817,8.49715],[-9.9164954,8.4977927],[-9.9161816,8.4982486],[-9.9157843,8.498683],[-9.9152219,8.4988738],[-9.9144691,8.4991841],[-9.9135658,8.499477],[-9.9117897,8.4998514],[-9.9100124,8.500307],[-9.9081706,8.5004273],[-9.906943,8.5005963],[-9.9058738,8.5004411],[-9.9052296,8.5003467],[-9.9046066,8.5002907],[-9.9037784,8.5001787],[-9.9024611,8.5000155],[-9.9019506,8.4997371],[-9.9014353,8.4993736],[-9.9009115,8.4992266],[-9.9004868,8.4991355],[-9.8987154,8.506459],[-9.9027508,8.5149274],[-9.8958912,8.5255103],[-9.8983607,8.5331081],[-9.9079641,8.540163],[-9.9096104,8.5472178],[-9.8871109,8.5537298],[-9.882172,8.5683815],[-9.8909523,8.5789629],[-9.8934217,8.5925283],[-9.8898548,8.5998534],[-9.8909523,8.6088062],[-9.8978119,8.6185726],[-9.9109823,8.6302377],[-9.91647,8.6362057],[-9.9260734,8.6421737],[-9.9312374,8.6426083],[-9.9389694,8.6432587],[-9.9444571,8.6508542],[-9.945829,8.6706558],[-9.9343049,8.7013055],[-9.9296404,8.7297831],[-9.9140005,8.7547332],[-9.9115311,8.7680211],[-9.9013789,8.7701905],[-9.889306,8.7829355],[-9.8829952,8.8051705],[-9.9454666,8.8093709],[-9.996238,8.8024239],[-10.0165465,8.8340704],[-10.0142032,8.8811491],[-10.0470093,8.9004419],[-10.0915319,8.8742034],[-10.1173081,8.8742034],[-10.1423032,8.9089304],[-10.180577,8.9104737],[-10.2071343,8.8865511],[-10.2305672,8.9151037],[-10.2495801,8.9343681],[-10.2523371,8.9371614],[-10.26103,8.9459689],[-10.2883684,8.9490552],[-10.3102391,8.980689],[-10.3071147,9.0362342],[-10.3282044,9.0601469],[-10.3610105,9.0632323],[-10.3828812,9.0400912],[-10.4039708,9.0015194],[-10.4484934,8.9860896],[-10.4891105,8.9837751],[-10.4933454,8.9994607],[-10.4953592,9.0069197],[-10.4602099,9.0362342],[-10.4625531,9.067089],[-10.4836428,9.0848294],[-10.5133245,9.062461],[-10.5359763,9.0632323],[-10.5732577,9.0494962],[-10.5735145,9.0494016],[-10.5735938,9.0493685],[-10.5735797,9.0491508],[-10.5735675,9.0489711],[-10.573612,9.0487555],[-10.5737475,9.0485318],[-10.5740245,9.0483262],[-10.5741236,9.0481005],[-10.574168,9.0478709],[-10.5739193,9.0477032],[-10.5737252,9.0475794],[-10.5735857,9.0472839],[-10.5737131,9.0470203],[-10.5738627,9.0470123],[-10.574073,9.04718],[-10.5744066,9.0472719],[-10.5745785,9.0471002],[-10.5745522,9.0466669],[-10.5745745,9.0462256],[-10.5743925,9.0454668],[-10.574348,9.0451233],[-10.574069,9.0447459],[-10.5738102,9.0443965],[-10.573798,9.044081],[-10.5738546,9.0439532],[-10.5741195,9.0438733],[-10.5742691,9.0435818],[-10.5743399,9.0434041],[-10.5747099,9.043484],[-10.574991,9.0436637],[-10.5754095,9.04344],[-10.5756926,9.0432164],[-10.5759514,9.0426673],[-10.5758417,9.0417308],[-10.5760439,9.0411677],[-10.5760156,9.0398378],[-10.5763755,9.039071],[-10.5762744,9.0386597],[-10.5760277,9.038424],[-10.5761491,9.0382483],[-10.5763715,9.0382603],[-10.5765049,9.0384879],[-10.5765939,9.0387435],[-10.5768365,9.0388354],[-10.5770953,9.0386836],[-10.5770994,9.0382843],[-10.5777262,9.0381764],[-10.578082,9.0379807],[-10.5782721,9.0367467],[-10.5784136,9.0361357],[-10.5787816,9.0358841],[-10.5791577,9.0348816],[-10.5789959,9.0344623],[-10.5784581,9.0343545],[-10.5782883,9.034051],[-10.5787533,9.0335478],[-10.5794488,9.0332203],[-10.5797521,9.0325174],[-10.5800959,9.0323297],[-10.5804153,9.0323536],[-10.5804679,9.0319583],[-10.5802643,9.0318137],[-10.580108,9.0318544],[-10.5795783,9.0318344],[-10.5793882,9.031455],[-10.5795459,9.0308839],[-10.5797602,9.0307122],[-10.5798984,9.0307362],[-10.5802834,9.0311735],[-10.5808609,9.0315157],[-10.5810795,9.0314671],[-10.5812459,9.0314301],[-10.5814806,9.0311686],[-10.5816057,9.0306933],[-10.5818078,9.0300564],[-10.5816635,9.0295241],[-10.5814325,9.0293054],[-10.5807298,9.0293625],[-10.5800753,9.0291819],[-10.5799695,9.0286876],[-10.580624,9.0281743],[-10.5806817,9.0276134],[-10.5801908,9.026929],[-10.5809031,9.026159],[-10.5805855,9.0254936],[-10.5809608,9.0249613],[-10.5809223,9.0244345],[-10.5808261,9.0240297],[-10.5815895,9.0232749],[-10.5816636,9.0226608],[-10.5813652,9.0216817],[-10.5808261,9.0209117],[-10.5811116,9.0193212],[-10.5808141,9.0181266],[-10.5803862,9.0179243],[-10.5799966,9.0171587],[-10.5799933,9.0166546],[-10.5805649,9.0157337],[-10.5809562,9.0151388],[-10.5811084,9.015216],[-10.5825065,9.0164079],[-10.5838182,9.0166123],[-10.5843572,9.0161132],[-10.5833562,9.0155951],[-10.5831252,9.01473],[-10.5834235,9.0144924],[-10.5838519,9.0146587],[-10.5845256,9.0143735],[-10.585801,9.0128906],[-10.5874329,9.0132865],[-10.5890186,9.0120438],[-10.5890407,9.0120983],[-10.5889193,9.0107247],[-10.5897802,9.0094238],[-10.5896515,9.0088642],[-10.5899789,9.0067603],[-10.5904224,9.0056652],[-10.5902434,9.0051265],[-10.5894855,9.0050465],[-10.5891139,9.0042289],[-10.5878593,9.0034767],[-10.5867564,9.0035609],[-10.586601,9.0017027],[-10.5875167,9.0004694],[-10.5890672,9.0000891],[-10.5893378,8.9981465],[-10.5903784,8.996317],[-10.5905936,8.9956823],[-10.5901448,8.9948756],[-10.5910425,8.993502],[-10.5913257,8.9918604],[-10.5911087,8.9877749],[-10.5907673,8.9875391],[-10.5906684,8.9874106],[-10.5908635,8.9872333],[-10.5911496,8.9873413],[-10.5912017,8.9869044],[-10.5904342,8.9859357],[-10.5904758,8.9852188],[-10.5897838,8.9842397],[-10.589149,8.9830885],[-10.5898723,8.9813514],[-10.5896069,8.9801642],[-10.5894664,8.978643],[-10.5905383,8.9776974],[-10.5898098,8.9756879],[-10.5889357,8.9741974],[-10.5892271,8.9732209],[-10.5887224,8.9713553],[-10.5876453,8.9701732],[-10.5878327,8.9694023],[-10.5886652,8.9687239],[-10.5890866,8.9674698],[-10.5885507,8.9649104],[-10.5880096,8.9632708],[-10.587073,8.9628905],[-10.585434,8.964417],[-10.5850802,8.9647048],[-10.5845911,8.9642782],[-10.5844871,8.9638002],[-10.5850334,8.9633428],[-10.5852519,8.9627723],[-10.5851687,8.9617958],[-10.5845651,8.9605006],[-10.5848513,8.9597245],[-10.5855329,8.9593544],[-10.5861,8.9597142],[-10.5866568,8.9595857],[-10.5867504,8.9592825],[-10.5872915,8.9593133],[-10.5878743,8.9598992],[-10.5889357,8.9594932],[-10.5892271,8.9575247],[-10.5895081,8.9571701],[-10.5892323,8.9569388],[-10.5889461,8.9572215],[-10.5886235,8.9578999],[-10.5880252,8.958306],[-10.5878639,8.9576841],[-10.5876974,8.9567281],[-10.5869898,8.9559263],[-10.5858659,8.9550011],[-10.5857722,8.953341],[-10.585382,8.952493],[-10.5854184,8.9521435],[-10.5850698,8.9515215],[-10.5851218,8.9503959],[-10.5849605,8.9499745],[-10.5850802,8.9488489],[-10.5845443,8.9479802],[-10.5842581,8.9469626],[-10.5845651,8.9457393],[-10.5840812,8.945215],[-10.5832851,8.9449734],[-10.5832435,8.9445623],[-10.5835271,8.9442436],[-10.5840838,8.9444286],[-10.5842321,8.9440817],[-10.584141,8.9437604],[-10.5832799,8.9428944],[-10.5831733,8.9425988],[-10.5833372,8.9423958],[-10.5838705,8.9423521],[-10.5839043,8.9421954],[-10.5834828,8.9417533],[-10.5831446,8.9414141],[-10.5831603,8.9412316],[-10.5834828,8.9409746],[-10.5838393,8.9408256],[-10.5842061,8.9407922],[-10.5841645,8.9404401],[-10.584011,8.9401111],[-10.5839954,8.9396228],[-10.5837924,8.9395586],[-10.5833996,8.9397359],[-10.5830588,8.9402679],[-10.5829105,8.940823],[-10.5826582,8.9408898],[-10.5824136,8.9406174],[-10.5824422,8.9399569],[-10.5821404,8.9395226],[-10.5827102,8.9391602],[-10.5832513,8.9390215],[-10.5837716,8.9386976],[-10.583782,8.9384484],[-10.5832409,8.9381682],[-10.5825619,8.9378855],[-10.5825437,8.9375849],[-10.5826503,8.9373818],[-10.5831186,8.9371737],[-10.5830042,8.9366982],[-10.5827752,8.9363847],[-10.5826347,8.9361919],[-10.5825983,8.9357319],[-10.5825489,8.9355212],[-10.5828689,8.9351871],[-10.5828585,8.9348144],[-10.5825957,8.9343749],[-10.5823121,8.9342079],[-10.5821014,8.9342002],[-10.5818621,8.9343929],[-10.581654,8.934488],[-10.5814458,8.9342644],[-10.5813522,8.934046],[-10.5814094,8.9335782],[-10.5813105,8.9334061],[-10.5811336,8.9333007],[-10.5807694,8.9332544],[-10.580655,8.9330334],[-10.580335,8.9318615],[-10.580015,8.9315865],[-10.5792319,8.9313603],[-10.5790316,8.9308746],[-10.5788495,8.9306793],[-10.5785867,8.9307101],[-10.578337,8.9308617],[-10.5782121,8.9310134],[-10.5780352,8.9310519],[-10.5779675,8.9308849],[-10.5781054,8.9302141],[-10.5782017,8.9297386],[-10.5778635,8.9292272],[-10.5775721,8.929109],[-10.577364,8.9295742],[-10.5772053,8.9294945],[-10.5769607,8.9301833],[-10.576789,8.9301396],[-10.5767032,8.9300034],[-10.5768203,8.9293686],[-10.577083,8.9292169],[-10.5773354,8.9287774],[-10.5774212,8.9285847],[-10.5772833,8.9282172],[-10.5770674,8.9279499],[-10.5770024,8.9277032],[-10.5771506,8.9275413],[-10.5774498,8.927567],[-10.5776892,8.9276723],[-10.5779233,8.9276672],[-10.5779727,8.9275156],[-10.5777022,8.9273639],[-10.5774368,8.9272817],[-10.5772911,8.9271737],[-10.5772391,8.9269681],[-10.5773666,8.9267188],[-10.5776814,8.9265492],[-10.5779701,8.9264438],[-10.5780612,8.9262768],[-10.5780638,8.9260352],[-10.5779545,8.9257628],[-10.5780222,8.9252591],[-10.578415,8.9248864],[-10.5785529,8.9246242],[-10.5783422,8.9243698],[-10.578043,8.9242002],[-10.5777646,8.9241565],[-10.5775305,8.9239946],[-10.5774212,8.9236605],[-10.5776606,8.923478],[-10.5775877,8.9232955],[-10.577096,8.9233855],[-10.5766746,8.9232261],[-10.5765003,8.9227789],[-10.5765393,8.9225014],[-10.5760892,8.9221107],[-10.5757406,8.9223909],[-10.5756808,8.9227764],[-10.5754752,8.9226941],[-10.5753244,8.9223754],[-10.5751917,8.9220388],[-10.5749393,8.9215993],[-10.5749497,8.9212831],[-10.5752151,8.9209285],[-10.5751266,8.9200546],[-10.5752957,8.9198413],[-10.5757588,8.9197231],[-10.5752151,8.9185049],[-10.5749211,8.9176773],[-10.5750174,8.9172866],[-10.5754362,8.917171],[-10.5759279,8.9170682],[-10.5760684,8.9168831],[-10.5759097,8.9162817],[-10.5757146,8.9159425],[-10.5753165,8.9157291],[-10.5753712,8.9155569],[-10.5757276,8.9153539],[-10.5764612,8.9148887],[-10.5765055,8.9145289],[-10.5763572,8.9140354],[-10.5761048,8.9137193],[-10.5757562,8.9135394],[-10.5754961,8.9134083],[-10.5755845,8.9130202],[-10.5758213,8.9123391],[-10.5755897,8.9121875],[-10.5751188,8.9124239],[-10.5749003,8.9129637],[-10.5746141,8.9133312],[-10.5740808,8.9132541],[-10.5738415,8.9123443],[-10.5738415,8.9117223],[-10.5735553,8.9113522],[-10.5735943,8.911108],[-10.5738519,8.9108664],[-10.5736359,8.9102881],[-10.5738024,8.9100388],[-10.5743358,8.909972],[-10.5744112,8.9098666],[-10.5742733,8.9095454],[-10.5737426,8.9092601],[-10.5732223,8.9091958],[-10.573022,8.9090262],[-10.5729934,8.9088488],[-10.5733029,8.9085044],[-10.5735969,8.9082603],[-10.5739559,8.9080906],[-10.5745803,8.9080264],[-10.5748144,8.9078362],[-10.5745517,8.90697],[-10.5745855,8.9059471],[-10.5742577,8.9054639],[-10.5746323,8.9049961],[-10.5749237,8.9043819],[-10.5746792,8.9033589],[-10.5749862,8.9020121],[-10.5758941,8.9004494],[-10.5760398,8.8999945],[-10.5760216,8.8996861],[-10.5753426,8.8991463],[-10.5751214,8.8987402],[-10.5750538,8.8981156],[-10.5751579,8.8975039],[-10.5755117,8.8970207],[-10.575764,8.8965581],[-10.5759097,8.8958872],[-10.5761074,8.8950699],[-10.5764196,8.8944736],[-10.5758707,8.8928826],[-10.5759825,8.8924765],[-10.5762973,8.8922734],[-10.5762427,8.891947],[-10.5758004,8.8917825],[-10.575327,8.8920421],[-10.5749862,8.8924739],[-10.5747,8.8923814],[-10.5745231,8.8921732],[-10.5744268,8.8911039],[-10.5742915,8.8908932],[-10.574047,8.8906875],[-10.573611,8.8907071],[-10.5733886,8.8910708],[-10.5734861,8.8913316],[-10.5734068,8.8914473],[-10.573183,8.8914293],[-10.5731807,8.8912093],[-10.5730621,8.8908626],[-10.5732142,8.8902752],[-10.5734094,8.8898987],[-10.5738321,8.889828],[-10.5741287,8.8897483],[-10.5743954,8.8895131],[-10.5747232,8.8891893],[-10.574675,8.8890711],[-10.5743355,8.8889425],[-10.574156,8.8888063],[-10.5741352,8.8885184],[-10.5742965,8.8882203],[-10.5746607,8.8880095],[-10.5747648,8.8877011],[-10.5745306,8.8872436],[-10.5739583,8.8872641],[-10.573823,8.8870328],[-10.5738411,8.8866956],[-10.5733039,8.8860141],[-10.5736167,8.885109],[-10.5733462,8.8849254],[-10.5730158,8.8851576],[-10.5728701,8.885939],[-10.5722978,8.8861858],[-10.5718035,8.8860213],[-10.5713716,8.8863451],[-10.5710178,8.8863297],[-10.5707889,8.8860315],[-10.5704975,8.8854455],[-10.570612,8.8851782],[-10.5714419,8.8846847],[-10.5715433,8.8843557],[-10.5714601,8.8840627],[-10.5707602,8.8836488],[-10.5706172,8.8834047],[-10.5706614,8.8831476],[-10.5709632,8.8827929],[-10.5710074,8.8823868],[-10.5709007,8.8822017],[-10.5703128,8.8820963],[-10.5701229,8.8819858],[-10.570024,8.8815463],[-10.5698263,8.8813432],[-10.5694829,8.8812121],[-10.5695063,8.8809911],[-10.5698003,8.8805284],[-10.5697664,8.8803125],[-10.5695739,8.8800066],[-10.5696364,8.8795003],[-10.5700604,8.8790453],[-10.5704897,8.8788422],[-10.5706172,8.8785646],[-10.5705495,8.8782022],[-10.5703154,8.8778963],[-10.5702555,8.8776547],[-10.5704507,8.8775159],[-10.5709189,8.8775056],[-10.5713066,8.877336],[-10.5709684,8.8767242],[-10.5712285,8.8759814],[-10.571023,8.8757089],[-10.5704663,8.8754519],[-10.5701255,8.8750483],[-10.5698424,8.874635],[-10.5698118,8.87419],[-10.5697438,8.8734448],[-10.5697488,8.8728254],[-10.5696613,8.872146],[-10.5694699,8.8715389],[-10.5690064,8.8711027],[-10.5687488,8.8709391],[-10.5683846,8.8708555],[-10.5679633,8.8710372],[-10.5677554,8.8708991],[-10.5676874,8.8707319],[-10.5683643,8.869754],[-10.5683938,8.8694959],[-10.5682209,8.8693614],[-10.5674924,8.8693178],[-10.5672606,8.8691324],[-10.5672385,8.8684599],[-10.5672128,8.8677401],[-10.5671429,8.8673366],[-10.5672459,8.8671476],[-10.5676396,8.8671912],[-10.567772,8.8670277],[-10.5680332,8.8669368],[-10.5680737,8.8667768],[-10.5678529,8.8665514],[-10.5674519,8.8665078],[-10.5671318,8.8665078],[-10.566889,8.8667368],[-10.5667271,8.8666296],[-10.5667179,8.8663097],[-10.5668669,8.8660534],[-10.5671741,8.865779],[-10.5675678,8.8655481],[-10.567187,8.8651682],[-10.5671355,8.8647466],[-10.5673783,8.8643431],[-10.5673047,8.864134],[-10.5668412,8.8641395],[-10.5668908,8.8634342],[-10.5671668,8.8631034],[-10.5667198,8.861613],[-10.5665376,8.8615348],[-10.5661955,8.8615203],[-10.566166,8.8610913],[-10.5659379,8.8604243],[-10.5653401,8.860168],[-10.5644416,8.8602898],[-10.5635292,8.8597663],[-10.5634482,8.859104],[-10.5630656,8.8584897],[-10.5630325,8.8580135],[-10.5625947,8.8573597],[-10.5630398,8.856832],[-10.5638971,8.8563012],[-10.563886,8.8552688],[-10.5621384,8.8556396],[-10.5621716,8.8546508],[-10.5616123,8.8520588],[-10.5612775,8.8502884],[-10.5613143,8.8484344],[-10.5621237,8.8475183],[-10.561616,8.8465876],[-10.5611414,8.8461732],[-10.5600928,8.8463949],[-10.5599125,8.845228],[-10.5597617,8.8450353],[-10.5594858,8.8451843],[-10.5593312,8.8454424],[-10.5590663,8.8451116],[-10.5590479,8.8447372],[-10.559747,8.8437811],[-10.5601995,8.8429813],[-10.5595851,8.8418615],[-10.5594563,8.8411854],[-10.5590884,8.840022],[-10.5590995,8.8385169],[-10.5592319,8.8378989],[-10.5602437,8.8368519],[-10.5602768,8.836452],[-10.559942,8.8348923],[-10.5593239,8.8342925],[-10.5588824,8.8337653],[-10.5592245,8.8331655],[-10.5593832,8.8325463],[-10.5593546,8.8320386],[-10.5594678,8.8316979],[-10.5598684,8.8312301],[-10.559646,8.8303959],[-10.5596148,8.8300257],[-10.5592013,8.8293075],[-10.5587892,8.8290057],[-10.5580239,8.828853],[-10.5579393,8.828624],[-10.5580865,8.8282822],[-10.5583955,8.8283004],[-10.5586715,8.8284313],[-10.5587524,8.8286967],[-10.558929,8.8286821],[-10.5591534,8.8285222],[-10.5593521,8.8284095],[-10.5594551,8.828195],[-10.559319,8.8277478],[-10.5589585,8.8276642],[-10.5583992,8.8274788],[-10.5578473,8.8271298],[-10.5576928,8.826908],[-10.5577517,8.8265444],[-10.558138,8.8262754],[-10.5583919,8.8259155],[-10.5580975,8.825341],[-10.5580313,8.8250829],[-10.5580755,8.8246066],[-10.5578253,8.8244285],[-10.5570232,8.8243522],[-10.5568577,8.8238359],[-10.5573175,8.8233305],[-10.5574022,8.8230542],[-10.5572955,8.8221526],[-10.55745,8.8214],[-10.5577002,8.8209056],[-10.5577701,8.8205929],[-10.5573695,8.8202004],[-10.5573842,8.819815],[-10.557811,8.8194732],[-10.5581937,8.8194151],[-10.5582231,8.8198368],[-10.5581422,8.8202149],[-10.5583555,8.8203385],[-10.5586793,8.820433],[-10.558981,8.8203167],[-10.5597831,8.8200549],[-10.5594641,8.8194311],[-10.5597347,8.8188347],[-10.5601215,8.8187461],[-10.5603278,8.8186933],[-10.5605151,8.8183925],[-10.5608351,8.8182717],[-10.5613034,8.8180943],[-10.5618653,8.8178655],[-10.5619044,8.8176444],[-10.5622868,8.8170788],[-10.5623622,8.8161739],[-10.5617951,8.8145594],[-10.5613201,8.8131246],[-10.5607683,8.8123357],[-10.5594401,8.8113722],[-10.5589949,8.8108523],[-10.5589986,8.8105323],[-10.5594842,8.8101433],[-10.5595872,8.8099942],[-10.559705,8.8096416],[-10.5597234,8.8086163],[-10.5596093,8.8075946],[-10.5597491,8.8073838],[-10.5604408,8.8070093],[-10.5608529,8.8066457],[-10.5610612,8.8059776],[-10.5610479,8.8053659],[-10.5608455,8.8047005],[-10.5604886,8.8046024],[-10.5598558,8.8049478],[-10.5592156,8.8051587],[-10.5586674,8.8049623],[-10.5581295,8.8049801],[-10.5573994,8.8053195],[-10.5570155,8.8056713],[-10.5563091,8.8060385],[-10.5556395,8.8060894],[-10.5546866,8.8057077],[-10.5538441,8.8051696],[-10.5524349,8.8041479],[-10.5520302,8.8040534],[-10.5518904,8.803857],[-10.5519125,8.8035189],[-10.5515188,8.80253],[-10.550766,8.8013181],[-10.5507241,8.8002248],[-10.5505623,8.7993413],[-10.5503047,8.7987923],[-10.5500472,8.7984978],[-10.5496903,8.7986578],[-10.5493776,8.799374],[-10.5494144,8.8003848],[-10.5487756,8.8018742],[-10.5480679,8.8025015],[-10.5467984,8.8024603],[-10.5452687,8.8027174],[-10.5445679,8.8030797],[-10.5441968,8.8035196],[-10.5438742,8.8048976],[-10.5436141,8.8051649],[-10.5430105,8.805279],[-10.5407888,8.8042446],[-10.5394828,8.8035247],[-10.5393787,8.802846],[-10.5402268,8.8016685],[-10.5402633,8.8011492],[-10.5399979,8.8004087],[-10.5396285,8.8001876],[-10.5391186,8.8000642],[-10.5378854,8.7991336],[-10.5372246,8.7990924],[-10.536413,8.7987531],[-10.5362517,8.7985679],[-10.5361996,8.7979715],[-10.5369235,8.7978431],[-10.5376225,8.7968251],[-10.5379316,8.7960034],[-10.537674,8.7955743],[-10.5370339,8.7954362],[-10.5360552,8.7957634],[-10.5347307,8.7954725],[-10.5332002,8.7935091],[-10.5329868,8.792033],[-10.5304482,8.7903459],[-10.5288441,8.7886952],[-10.5278507,8.7882007],[-10.5273945,8.7884116],[-10.5277651,8.7891135],[-10.5268545,8.7891726],[-10.5259648,8.7883936],[-10.5251739,8.7876686],[-10.524612,8.7866273],[-10.5244299,8.7860874],[-10.5244507,8.7851901],[-10.5242088,8.7848122],[-10.523985,8.784771],[-10.5231057,8.7855089],[-10.5223616,8.7851335],[-10.5218856,8.7847119],[-10.5212586,8.7838532],[-10.5203532,8.7830356],[-10.5198161,8.7826356],[-10.5196763,8.7814139],[-10.5195585,8.7795304],[-10.519095,8.7783596],[-10.5187491,8.7767743],[-10.5186498,8.7763471],[-10.5182929,8.7758525],[-10.5178293,8.7751526],[-10.51757,8.7746163],[-10.517351,8.7739727],[-10.5173253,8.77298],[-10.5171432,8.7721892],[-10.5168206,8.7707853],[-10.5163991,8.7689495],[-10.5162482,8.7680033],[-10.5152859,8.7659182],[-10.5143685,8.7637803],[-10.5136152,8.7621769],[-10.5127364,8.7599483],[-10.5124048,8.7581322],[-10.5124505,8.757871],[-10.5130696,8.7569514],[-10.5129972,8.7562069],[-10.5123646,8.7539687],[-10.5123212,8.7527709],[-10.5118394,8.7509994],[-10.5105443,8.749101],[-10.509651,8.7480225],[-10.5090475,8.7472493],[-10.5093661,8.7464929],[-10.5096462,8.7460252],[-10.5106095,8.7456578],[-10.5112637,8.7450636],[-10.5113965,8.7447104],[-10.511172,8.7434124],[-10.5111189,8.7423767],[-10.5114134,8.741303],[-10.5112015,8.7406784],[-10.510665,8.7406253],[-10.510129,8.741155],[-10.5103367,8.7422431],[-10.5100566,8.7426917],[-10.509686,8.7427496],[-10.5095392,8.7426466],[-10.5089724,8.7428272],[-10.5084256,8.7427693],[-10.5081803,8.7426922],[-10.5080642,8.7420662],[-10.5077399,8.741398],[-10.5073592,8.7413812],[-10.50655,8.7411568],[-10.5060208,8.7408193],[-10.505507,8.7408885],[-10.504573,8.7405153],[-10.5041122,8.7404953],[-10.5036989,8.7408021],[-10.5029768,8.7415732],[-10.5023469,8.7422447],[-10.5016982,8.7436098],[-10.5010714,8.7438377],[-10.5000236,8.7437231],[-10.4978266,8.7430646],[-10.4953513,8.7418059],[-10.4949253,8.7414091],[-10.4948017,8.7411951],[-10.4953752,8.7406552],[-10.4962613,8.7401001],[-10.4976709,8.7396377],[-10.4979411,8.7396715],[-10.4985215,8.7399668],[-10.4988441,8.7406822],[-10.4999128,8.7412069],[-10.5004421,8.7413562],[-10.50091,8.7416087],[-10.5016991,8.7409059],[-10.5021252,8.7403093],[-10.5026914,8.7397915],[-10.5039951,8.7384075],[-10.5050212,8.7373313],[-10.5058065,8.7363864],[-10.5061069,8.735104],[-10.5061342,8.7341119],[-10.5056244,8.7336815],[-10.5050254,8.7333096],[-10.5046935,8.7332137],[-10.5043144,8.7333121],[-10.5041985,8.7330185],[-10.5040635,8.7329002],[-10.5038276,8.7327898],[-10.5035435,8.7326262],[-10.5031765,8.7323279],[-10.503249,8.7319652],[-10.5035591,8.7316761],[-10.5038956,8.7315045],[-10.5041483,8.7313746],[-10.5041355,8.7305459],[-10.5033717,8.7301633],[-10.5023601,8.7296169],[-10.5009478,8.7286218],[-10.5005373,8.7282233],[-10.5008295,8.7274549],[-10.50025,8.7266937],[-10.4998976,8.7260255],[-10.4979131,8.7255864],[-10.4965369,8.7249326],[-10.4952441,8.7242799],[-10.4950614,8.7238023],[-10.4952779,8.7232407],[-10.495797,8.7227431],[-10.4963455,8.7211759],[-10.4951986,8.7190366],[-10.4957714,8.7180454],[-10.4959232,8.7173492],[-10.4965545,8.7169423],[-10.4976747,8.7171213],[-10.4991202,8.716723],[-10.4994343,8.716129],[-10.4994907,8.7151216],[-10.4999856,8.7134347],[-10.4979485,8.7127162],[-10.4973635,8.7117068],[-10.4944135,8.7123547],[-10.4930615,8.7131512],[-10.4927652,8.7118427],[-10.493417,8.7099279],[-10.4956626,8.7074958],[-10.4963912,8.7068419],[-10.4962775,8.7064009],[-10.494712,8.7065928],[-10.4932698,8.7063481],[-10.4921856,8.7063276],[-10.491791,8.7064985],[-10.4914127,8.7068342],[-10.4902153,8.7072375],[-10.4883109,8.707866],[-10.4880423,8.7076456],[-10.4879804,8.7071035],[-10.4874537,8.7062349],[-10.4872574,8.7055465],[-10.486248,8.705395],[-10.4861192,8.7049667],[-10.4861398,8.7042399],[-10.4853806,8.7042558],[-10.4851288,8.7029769],[-10.4844186,8.7024508],[-10.4839063,8.7022019],[-10.4837185,8.7024364],[-10.4834351,8.7025293],[-10.4833702,8.7020871],[-10.4835649,8.7018493],[-10.4837526,8.7015353],[-10.4837509,8.7007085],[-10.4840377,8.6999086],[-10.4840433,8.6992572],[-10.4838067,8.6988801],[-10.4831854,8.6992268],[-10.4826443,8.6998427],[-10.4813861,8.6999051],[-10.4808569,8.6997381],[-10.4803789,8.6992386],[-10.4804499,8.6985352],[-10.4801546,8.6972565],[-10.4800558,8.6961275],[-10.4798053,8.69528],[-10.4795247,8.6946765],[-10.4792218,8.6944723],[-10.478868,8.6944713],[-10.4782886,8.6946952],[-10.4776355,8.6951594],[-10.4769293,8.6952303],[-10.4761884,8.695561],[-10.474061,8.695738],[-10.4736884,8.6953825],[-10.4733884,8.6946669],[-10.4739529,8.6942948],[-10.474642,8.6941525],[-10.4768064,8.6939207],[-10.4770991,8.6934744],[-10.4770251,8.6932576],[-10.4760969,8.693185],[-10.4755416,8.6931993],[-10.4750829,8.6926647],[-10.4753606,8.6921349],[-10.4759448,8.6913569],[-10.4760704,8.6909154],[-10.4759641,8.6903307],[-10.475602,8.6886172],[-10.4754934,8.6872903],[-10.4755272,8.6864717],[-10.4758,8.6857891],[-10.4767789,8.6849458],[-10.4771664,8.6844216],[-10.4772462,8.6834596],[-10.4771389,8.6828109],[-10.4767129,8.6825353],[-10.4755696,8.6829697],[-10.4746984,8.6837126],[-10.4744818,8.6843262],[-10.4739193,8.6854646],[-10.4729536,8.686634],[-10.4721207,8.6872449],[-10.4708532,8.6858392],[-10.4702351,8.6850803],[-10.4701917,8.6839467],[-10.4701319,8.6836913],[-10.4697963,8.6829515],[-10.4690455,8.6819563],[-10.4694535,8.6811663],[-10.4692024,8.6810041],[-10.4686012,8.6810733],[-10.4677828,8.6810685],[-10.4669451,8.6805458],[-10.4661194,8.6805124],[-10.4655424,8.6798585],[-10.4647119,8.6792332],[-10.4645525,8.6783549],[-10.4644032,8.6775108],[-10.4647241,8.676775],[-10.4649785,8.6764104],[-10.4654718,8.6763531],[-10.4660796,8.675916],[-10.4661513,8.6753726],[-10.4664449,8.6749321],[-10.466462,8.674571],[-10.4662098,8.6741158],[-10.4653626,8.6735905],[-10.4650006,8.6734841],[-10.4643593,8.6729199],[-10.4646877,8.6717303],[-10.4652398,8.6709405],[-10.4658627,8.6701682],[-10.4665869,8.6698246],[-10.4670185,8.66997],[-10.4672125,8.6702546],[-10.4672893,8.6709882],[-10.4679802,8.6714773],[-10.4686138,8.6716456],[-10.469286,8.671497],[-10.4697332,8.6706751],[-10.4698491,8.6702444],[-10.4707235,8.669374],[-10.4709307,8.6692424],[-10.471462,8.669118],[-10.4718254,8.6689443],[-10.4722611,8.6681264],[-10.4727248,8.6678595],[-10.4726453,8.6674174],[-10.473172,8.6666576],[-10.4718042,8.6630816],[-10.4718791,8.6622322],[-10.4723223,8.6616576],[-10.4735328,8.6606357],[-10.4740297,8.6592465],[-10.475103,8.6579979],[-10.4769412,8.6566655],[-10.4772872,8.6559695],[-10.476918,8.6557639],[-10.4746016,8.6557204],[-10.474249,8.6554121],[-10.4732749,8.6549947],[-10.4721275,8.6546153],[-10.4720083,8.6544163],[-10.4719963,8.653984],[-10.4724896,8.6524177],[-10.4719751,8.6520312],[-10.4710674,8.6518255],[-10.4705065,8.6516734],[-10.4702617,8.6514029],[-10.4745308,8.6460019],[-10.4754998,8.6456349],[-10.4773118,8.645612],[-10.4782195,8.6450487],[-10.4782449,8.6447505],[-10.4778709,8.643057],[-10.478062,8.6419684],[-10.4789656,8.640642],[-10.4800141,8.6397231],[-10.4813059,8.6391959],[-10.4825484,8.6389067],[-10.4834183,8.6383937],[-10.4874464,8.63626],[-10.4884502,8.6357642],[-10.4896354,8.634658],[-10.4905582,8.6336085],[-10.491481,8.6329317],[-10.4924272,8.6323415],[-10.4933526,8.6315419],[-10.4935732,8.6304876],[-10.4933093,8.6295205],[-10.4911199,8.6275094],[-10.492699,8.6256861],[-10.4931024,8.6254609],[-10.4947998,8.6253682],[-10.4955918,8.6251145],[-10.4967147,8.6246134],[-10.4988472,8.6245333],[-10.5002019,8.6241096],[-10.5023463,8.6227043],[-10.5032981,8.6219876],[-10.5054986,8.6210617],[-10.5070607,8.6212548],[-10.5098658,8.6206048],[-10.5104205,8.6179389],[-10.5108374,8.6157521],[-10.5111147,8.615664],[-10.5113547,8.6154095],[-10.5134509,8.6144867],[-10.5143885,8.6148416],[-10.5152296,8.6153552],[-10.5171401,8.6167013],[-10.5176478,8.6175559],[-10.5176009,8.6191983],[-10.5197275,8.6201645],[-10.5202931,8.6203175],[-10.523854,8.6178559],[-10.5259918,8.6166868],[-10.5281298,8.615814],[-10.5290076,8.6155904],[-10.5302127,8.6148012],[-10.5308865,8.6143348],[-10.5322046,8.61605],[-10.5336554,8.6162469],[-10.5341447,8.6165509],[-10.53478,8.6170242],[-10.5351941,8.6169488],[-10.53555,8.6168925],[-10.5372866,8.6163933],[-10.5384509,8.6159914],[-10.539565,8.6157416],[-10.5414802,8.6147459],[-10.5418511,8.6144768],[-10.5420813,8.61354],[-10.5421182,8.61197],[-10.5423184,8.61041],[-10.542617,8.609729],[-10.5453576,8.6083858],[-10.5464593,8.6076462],[-10.5479069,8.6071081],[-10.5492626,8.6075353],[-10.5501796,8.60763],[-10.5526506,8.6051912],[-10.5543085,8.6029105],[-10.554739,8.6027217],[-10.5570898,8.6037376],[-10.5582591,8.6041177],[-10.5591722,8.6040068],[-10.5594606,8.6033891],[-10.5594125,8.6026447],[-10.5587237,8.6018845],[-10.558179,8.6005065],[-10.5582752,8.5997779],[-10.5596528,8.5983049],[-10.5605338,8.5979089],[-10.5610464,8.5988276],[-10.5620938,8.6000085],[-10.5642662,8.6011559],[-10.567532,8.6023691],[-10.5677214,8.6023633],[-10.568367,8.6023438],[-10.570556,8.6000046],[-10.5732528,8.5993819],[-10.5747711,8.5987313],[-10.5763268,8.5961162],[-10.5763627,8.5953943],[-10.5764057,8.5951011],[-10.5760504,8.5938518],[-10.5757998,8.5932523],[-10.5739294,8.5900296],[-10.5733832,8.5888867],[-10.5735572,8.5874868],[-10.5742139,8.5859187],[-10.5742831,8.5850972],[-10.5741453,8.5845249],[-10.5730285,8.5831468],[-10.57431,8.581753],[-10.5749964,8.5794249],[-10.5749188,8.5771753],[-10.5744702,8.5750686],[-10.5743261,8.574245],[-10.5744222,8.5733896],[-10.5763444,8.5726451],[-10.5775619,8.5725501],[-10.5783948,8.5735005],[-10.5785889,8.5735592],[-10.5795482,8.573849],[-10.5814267,8.5730245],[-10.5831985,8.5720912],[-10.5849814,8.5699559],[-10.5867512,8.5682196],[-10.5902366,8.5633833],[-10.5904769,8.562592],[-10.5902573,8.5611877],[-10.5905443,8.5602073],[-10.5912525,8.5592462],[-10.5922661,8.557815],[-10.5925355,8.5569209],[-10.5924968,8.5560119],[-10.5927026,8.5546713],[-10.5926676,8.5520486],[-10.5928698,8.5506373],[-10.5931148,8.5499335],[-10.5932626,8.5495951],[-10.5935724,8.5492498],[-10.5938459,8.5491375],[-10.594122,8.5490913],[-10.5947287,8.5490606],[-10.5954131,8.5488991],[-10.5961053,8.5485645],[-10.5968675,8.5480415],[-10.5982753,8.5470224],[-10.5990414,8.5465878],[-10.5998891,8.5462108],[-10.6013918,8.5461403],[-10.6024079,8.5463517],[-10.6028602,8.5464773],[-10.6035215,8.5464785],[-10.6039971,8.5463915],[-10.6044649,8.5462414],[-10.605323,8.5457911],[-10.6067326,8.5447219],[-10.608948,8.5434656],[-10.6101119,8.5431155],[-10.6106337,8.5430656],[-10.6111811,8.5433103],[-10.611539,8.543577],[-10.6114852,8.5453223],[-10.6116117,8.5456817],[-10.6118362,8.5459988],[-10.6121179,8.5461959],[-10.6124363,8.5461642],[-10.6126815,8.5460968],[-10.6133637,8.5452708],[-10.614188,8.5440325],[-10.6149785,8.5431127],[-10.6153254,8.5428165],[-10.6158132,8.5422015],[-10.616028,8.5416651],[-10.6160393,8.541164],[-10.6159366,8.5407407],[-10.6158501,8.5403844],[-10.6158208,8.5397652],[-10.6158704,8.5393688],[-10.6160866,8.5389768],[-10.6162465,8.538616],[-10.6161699,8.5383866],[-10.6160046,8.5382839],[-10.6153506,8.5380236],[-10.6149805,8.5377902],[-10.6147949,8.5375996],[-10.6146962,8.5374984],[-10.6144548,8.5371908],[-10.6139237,8.5368088],[-10.6137413,8.5365329],[-10.6136287,8.5363207],[-10.6135493,8.5359282],[-10.6139147,8.5353393],[-10.6139934,8.5340873],[-10.6140794,8.5331165],[-10.6146747,8.5323314],[-10.6152434,8.5316682],[-10.6169868,8.5304109],[-10.6186337,8.5294242],[-10.6195949,8.5286815],[-10.6200593,8.5284096],[-10.6205318,8.5276551],[-10.6211529,8.5256707],[-10.6219992,8.5199621],[-10.6224077,8.5168513],[-10.6229041,8.5153093],[-10.623713,8.5131725],[-10.62518,8.5121184],[-10.6257532,8.5111549],[-10.6260055,8.509898],[-10.626051,8.5080266],[-10.6272072,8.5073884],[-10.6274034,8.5060203],[-10.6276385,8.5050267],[-10.6276604,8.504321],[-10.6269706,8.5024808],[-10.6270845,8.50193],[-10.626944,8.501389],[-10.6264507,8.5003906],[-10.6251374,8.5001598],[-10.6236777,8.4988247],[-10.6206151,8.4962966],[-10.6203509,8.4958211],[-10.6202156,8.4954474],[-10.6202737,8.4948492],[-10.6207086,8.4944374],[-10.6216016,8.494039],[-10.622166,8.4937871],[-10.6225257,8.4934003],[-10.622546,8.4927656],[-10.621978,8.4921894],[-10.6216715,8.4922873],[-10.6207947,8.4930391],[-10.6205194,8.4931484],[-10.6203291,8.4931459],[-10.6201491,8.4929958],[-10.6199328,8.4924806],[-10.6198826,8.4921305],[-10.6199328,8.4916886],[-10.6201038,8.4911282],[-10.6204176,8.4906041],[-10.6212407,8.4900139],[-10.6220412,8.4895431],[-10.6225113,8.4891846],[-10.6226913,8.4888641],[-10.622537,8.4884571],[-10.6224856,8.4879381],[-10.6231697,8.4875667],[-10.6242295,8.4870172],[-10.6249702,8.487002],[-10.6257623,8.4871902],[-10.6268736,8.4879534],[-10.6284904,8.4886012],[-10.6309236,8.4903169],[-10.6318787,8.4908229],[-10.6325682,8.490945],[-10.6331414,8.4908085],[-10.633597,8.4905075],[-10.6338895,8.4899933],[-10.6339416,8.488245],[-10.633931,8.4852102],[-10.6342636,8.4835442],[-10.6342528,8.4830799],[-10.6341241,8.4826847],[-10.6340597,8.4825547],[-10.6339363,8.4824273],[-10.6336358,8.4821833],[-10.6322734,8.4813184],[-10.6317477,8.4807932],[-10.6315492,8.4804748],[-10.6315035,8.4801737],[-10.6316082,8.479419],[-10.6317423,8.479159],[-10.6319676,8.4788937],[-10.6321553,8.47857],[-10.6325468,8.4777901],[-10.6333725,8.4764617],[-10.6339304,8.4759735],[-10.6346598,8.4755477],[-10.6356389,8.4753329],[-10.6366609,8.475232],[-10.6387368,8.475301],[-10.6400109,8.4750676],[-10.6406144,8.4748819],[-10.6408934,8.4747598],[-10.6411427,8.4745688],[-10.6415076,8.4738684],[-10.6416069,8.4734891],[-10.6416068,8.4730938],[-10.6412026,8.4706443],[-10.6409559,8.4701323],[-10.6407789,8.4699625],[-10.6403551,8.4695805],[-10.6397274,8.4686944],[-10.6392232,8.4678508],[-10.6389014,8.4674581],[-10.6386599,8.4670337],[-10.6385795,8.4667047],[-10.6385795,8.4663757],[-10.6386922,8.4662059],[-10.6390193,8.4660361],[-10.6397329,8.4658186],[-10.6403538,8.4655277],[-10.6417444,8.4637678],[-10.6419591,8.4634123],[-10.6420287,8.4630515],[-10.6419698,8.4627809],[-10.6418089,8.4624785],[-10.6415031,8.4621654],[-10.6413315,8.4620646],[-10.6410471,8.4619903],[-10.6408969,8.4618895],[-10.6408271,8.4617516],[-10.640795,8.461603],[-10.6408379,8.4614916],[-10.6409506,8.4611427],[-10.6414173,8.4605803],[-10.6415191,8.4602539],[-10.6415246,8.4597193],[-10.6413154,8.4593214],[-10.6409452,8.4590083],[-10.6406985,8.458621],[-10.6400628,8.4568993],[-10.640589,8.4559538],[-10.6417102,8.4547298],[-10.6419756,8.453939],[-10.6419381,8.453267],[-10.6417638,8.4529628],[-10.6415453,8.4520336],[-10.6408214,8.4513602],[-10.6408289,8.4505279],[-10.6417226,8.449779],[-10.6421304,8.4480598],[-10.6419162,8.4465801],[-10.641539,8.4455091],[-10.6407476,8.443263],[-10.6411451,8.4412169],[-10.6427667,8.4396914],[-10.6443841,8.4387091],[-10.6444438,8.4379824],[-10.6439755,8.4366114],[-10.6440877,8.4355625],[-10.6446716,8.4338695],[-10.6450889,8.4312008],[-10.6464383,8.4279338],[-10.646771,8.4258531],[-10.6494162,8.4255259],[-10.6507567,8.4245146],[-10.6509469,8.4232917],[-10.6502605,8.4226122],[-10.6479671,8.4233193],[-10.6443551,8.4217517],[-10.6445055,8.4199437],[-10.6442027,8.4181329],[-10.6439486,8.4144135],[-10.644914,8.4125538],[-10.6453815,8.4111635],[-10.6447107,8.409538],[-10.6430196,8.4069461],[-10.6426522,8.404806],[-10.6420179,8.4027022],[-10.6413404,8.4009298],[-10.6408456,8.3998655],[-10.6406615,8.3994215],[-10.6397314,8.3981282],[-10.6391138,8.3953803],[-10.6388735,8.394087],[-10.6393554,8.3926539],[-10.6393783,8.3923048],[-10.6397123,8.3919001],[-10.6411683,8.3914302],[-10.6426816,8.389978],[-10.6451435,8.3891761],[-10.6473891,8.3888967],[-10.647583,8.387053],[-10.6473471,8.386831],[-10.6473776,8.3860949],[-10.6478304,8.3844859],[-10.6492836,8.3825962],[-10.6535516,8.3813395],[-10.6586325,8.3813395],[-10.6619351,8.3824454],[-10.6630021,8.3833653],[-10.6642194,8.3836702],[-10.6649345,8.3832325],[-10.665949,8.3817919],[-10.6694565,8.3784944],[-10.673342,8.378365],[-10.6737657,8.3783315],[-10.6760681,8.3755774],[-10.6765637,8.3739668],[-10.6769389,8.3709835],[-10.6775971,8.3695619],[-10.6780062,8.3685212],[-10.6783404,8.3666487],[-10.6786368,8.366086],[-10.6784008,8.3653615],[-10.6784467,8.3637574],[-10.6791128,8.3624554],[-10.6788666,8.3621597],[-10.6787223,8.3617469],[-10.6786002,8.3608775],[-10.6783258,8.3607359],[-10.6785852,8.3593428],[-10.6792459,8.3557966],[-10.6784628,8.3538116],[-10.6782776,8.3534547],[-10.6785994,8.352924],[-10.6786102,8.3517988],[-10.6785351,8.3512574],[-10.6786237,8.3503299],[-10.6790313,8.3481113],[-10.6808869,8.3460507],[-10.6826041,8.3438758],[-10.6832371,8.3424215],[-10.6836555,8.3402347],[-10.6850732,8.3377103],[-10.6854725,8.3356933],[-10.6860593,8.3342872],[-10.6865944,8.3335129],[-10.6873649,8.3332214],[-10.6878329,8.3324509],[-10.6880573,8.3306805],[-10.6883061,8.329981],[-10.6887132,8.3293369],[-10.6902567,8.3284891],[-10.6919367,8.3274315],[-10.6920884,8.3263424],[-10.691579,8.3256327],[-10.6902965,8.3251628],[-10.6894158,8.3245382],[-10.689855,8.3228784],[-10.6906474,8.321688],[-10.6918854,8.3208559],[-10.6948615,8.3188854],[-10.6965639,8.3159698],[-10.696624,8.3158667],[-10.6982096,8.3137165],[-10.6983087,8.312932],[-10.6965178,8.3117484],[-10.6949169,8.3104714],[-10.6941748,8.308896],[-10.6944013,8.3078173],[-10.695364,8.3063044],[-10.6965248,8.3039721],[-10.6977352,8.3026553],[-10.6994625,8.3011844],[-10.7000357,8.2997905],[-10.6997102,8.2985019],[-10.6987562,8.2973578],[-10.6970137,8.2960651],[-10.6961286,8.2953973],[-10.6956041,8.2937974],[-10.6958598,8.2916847],[-10.6965632,8.2909382],[-10.6972983,8.2904564],[-10.6978865,8.2908699],[-10.6980224,8.2917907],[-10.6989394,8.2923103],[-10.7002603,8.2923276],[-10.7007921,8.2917637],[-10.7010569,8.2904561],[-10.7007953,8.2881798],[-10.7018579,8.2825943],[-10.7017313,8.2811139],[-10.7013199,8.2803268],[-10.7006355,8.2801129],[-10.6953253,8.2830728],[-10.6925599,8.2841561],[-10.6902494,8.2855596],[-10.6888725,8.2862086],[-10.6873863,8.2865366],[-10.6864161,8.2865403],[-10.6854088,8.2865024]]]]}]}
