# Supplementary material
Source: ML conference proceedings conference paper supplement (https://proceedings.neurips.cc/paper_files/paper/2022/hash/9d3faa41886997cfc2128b930077fa49-Abstract.html)
Supplement: Supplementary file 1 [file 9d3faa41886997cfc2128b930077fa49-Supplemental-Conference.zip › code/ebola/map/geojson/kailahun.geojson]

{"type":"GeometryCollection","geometries":[{"type":"MultiPolygon","coordinates":[[[[-10.9254214,8.3866714],[-10.9106609,8.3849534],[-10.9028466,8.378511],[-10.8932957,8.380229],[-10.8833107,8.3896778],[-10.8833107,8.40428],[-10.8715892,8.4270411],[-10.8511851,8.4261822],[-10.8338199,8.4077157],[-10.7895386,8.4055684],[-10.7782512,8.3965495],[-10.7765147,8.380229],[-10.7673979,8.3866714],[-10.7517692,8.4025621],[-10.7365747,8.4111514],[-10.7179071,8.4253233],[-10.697503,8.4356299],[-10.6886932,8.438696],[-10.6740599,8.443789],[-10.646667,8.451667],[-10.6417638,8.4529628],[-10.6415453,8.4520336],[-10.6408214,8.4513602],[-10.6408289,8.4505279],[-10.6417226,8.449779],[-10.6421304,8.4480598],[-10.6419162,8.4465801],[-10.641539,8.4455091],[-10.6407476,8.443263],[-10.6411451,8.4412169],[-10.6427667,8.4396914],[-10.6443841,8.4387091],[-10.6444438,8.4379824],[-10.6439755,8.4366114],[-10.6440877,8.4355625],[-10.6446716,8.4338695],[-10.6450889,8.4312008],[-10.6464383,8.4279338],[-10.646771,8.4258531],[-10.6494162,8.4255259],[-10.6507567,8.4245146],[-10.6509469,8.4232917],[-10.6502605,8.4226122],[-10.6479671,8.4233193],[-10.6443551,8.4217517],[-10.6445055,8.4199437],[-10.6442027,8.4181329],[-10.6439486,8.4144135],[-10.644914,8.4125538],[-10.6453815,8.4111635],[-10.6447107,8.409538],[-10.6430196,8.4069461],[-10.6426522,8.404806],[-10.6420179,8.4027022],[-10.6413404,8.4009298],[-10.6408456,8.3998655],[-10.6406615,8.3994215],[-10.6397314,8.3981282],[-10.6391138,8.3953803],[-10.6388735,8.394087],[-10.6393554,8.3926539],[-10.6393783,8.3923048],[-10.6397123,8.3919001],[-10.6411683,8.3914302],[-10.6426816,8.389978],[-10.6451435,8.3891761],[-10.6473891,8.3888967],[-10.647583,8.387053],[-10.6473471,8.386831],[-10.6473776,8.3860949],[-10.6478304,8.3844859],[-10.6492836,8.3825962],[-10.6535516,8.3813395],[-10.6586325,8.3813395],[-10.6619351,8.3824454],[-10.6630021,8.3833653],[-10.6642194,8.3836702],[-10.6649345,8.3832325],[-10.665949,8.3817919],[-10.6694565,8.3784944],[-10.673342,8.378365],[-10.6737657,8.3783315],[-10.6760681,8.3755774],[-10.6765637,8.3739668],[-10.6769389,8.3709835],[-10.6775971,8.3695619],[-10.6780062,8.3685212],[-10.6783404,8.3666487],[-10.6786368,8.366086],[-10.6784008,8.3653615],[-10.6784467,8.3637574],[-10.6791128,8.3624554],[-10.6788666,8.3621597],[-10.6787223,8.3617469],[-10.6786002,8.3608775],[-10.6783258,8.3607359],[-10.6785852,8.3593428],[-10.6792459,8.3557966],[-10.6784628,8.3538116],[-10.6782776,8.3534547],[-10.6785994,8.352924],[-10.6786102,8.3517988],[-10.6785351,8.3512574],[-10.6786237,8.3503299],[-10.6790313,8.3481113],[-10.6808869,8.3460507],[-10.6826041,8.3438758],[-10.6832371,8.3424215],[-10.6836555,8.3402347],[-10.6850732,8.3377103],[-10.6854725,8.3356933],[-10.6860593,8.3342872],[-10.6865944,8.3335129],[-10.6873649,8.3332214],[-10.6878329,8.3324509],[-10.6880573,8.3306805],[-10.6883061,8.329981],[-10.6887132,8.3293369],[-10.6902567,8.3284891],[-10.6919367,8.3274315],[-10.6920884,8.3263424],[-10.691579,8.3256327],[-10.6902965,8.3251628],[-10.6894158,8.3245382],[-10.689855,8.3228784],[-10.6906474,8.321688],[-10.6918854,8.3208559],[-10.6948615,8.3188854],[-10.6965639,8.3159698],[-10.696624,8.3158667],[-10.6982096,8.3137165],[-10.6983087,8.312932],[-10.6965178,8.3117484],[-10.6949169,8.3104714],[-10.6941748,8.308896],[-10.6944013,8.3078173],[-10.695364,8.3063044],[-10.6965248,8.3039721],[-10.6977352,8.3026553],[-10.6994625,8.3011844],[-10.7000357,8.2997905],[-10.6997102,8.2985019],[-10.6987562,8.2973578],[-10.6970137,8.2960651],[-10.6961286,8.2953973],[-10.6956041,8.2937974],[-10.6958598,8.2916847],[-10.6965632,8.2909382],[-10.6972983,8.2904564],[-10.6978865,8.2908699],[-10.6980224,8.2917907],[-10.6989394,8.2923103],[-10.7002603,8.2923276],[-10.7007921,8.2917637],[-10.7010569,8.2904561],[-10.7007953,8.2881798],[-10.7018579,8.2825943],[-10.7017313,8.2811139],[-10.7013199,8.2803268],[-10.7006355,8.2801129],[-10.6953253,8.2830728],[-10.6925599,8.2841561],[-10.6902494,8.2855596],[-10.6888725,8.2862086],[-10.6873863,8.2865366],[-10.6864161,8.2865403],[-10.6854088,8.2865024],[-10.6857501,8.2925901],[-10.6866148,8.2974293],[-10.685096,8.3041783],[-10.6847831,8.3096608],[-10.6829669,8.31541],[-10.6803411,8.3159121],[-10.6791222,8.3153875],[-10.6770489,8.3152334],[-10.6760944,8.3181448],[-10.6755631,8.3231643],[-10.6730914,8.3270706],[-10.6732091,8.32894],[-10.6734193,8.332204],[-10.6725102,8.3339291],[-10.6693338,8.337437],[-10.6670389,8.3393176],[-10.6661453,8.3398038],[-10.6659036,8.3403569],[-10.6659722,8.3418837],[-10.6655484,8.3438676],[-10.6655648,8.3442534],[-10.665458,8.3447989],[-10.6649903,8.3456904],[-10.6646005,8.3458875],[-10.6635679,8.3459328],[-10.6631955,8.3468097],[-10.6631152,8.3477735],[-10.6629065,8.3489037],[-10.6590222,8.3502889],[-10.6574834,8.3505092],[-10.651665,8.3511556],[-10.6486728,8.3526848],[-10.6446893,8.3532351],[-10.6426503,8.3544491],[-10.6408767,8.3537443],[-10.6392606,8.3536926],[-10.6384869,8.3524816],[-10.6380786,8.3508722],[-10.6386857,8.3488792],[-10.6385196,8.34757],[-10.6381022,8.3445333],[-10.6372537,8.3427868],[-10.6366779,8.3421797],[-10.6358184,8.3420099],[-10.6353971,8.3420469],[-10.6347752,8.3423298],[-10.6335857,8.3430729],[-10.6318578,8.3467503],[-10.6306203,8.3468941],[-10.6297647,8.3475787],[-10.6275683,8.3501773],[-10.6246029,8.3515192],[-10.6238543,8.3512209],[-10.6234119,8.3507435],[-10.6233313,8.3493773],[-10.6243138,8.3462824],[-10.6231402,8.3441048],[-10.6224762,8.3431458],[-10.6192294,8.339899],[-10.6166669,8.3380884],[-10.6125443,8.3377403],[-10.6094803,8.3389068],[-10.6059269,8.3409047],[-10.6046351,8.3408789],[-10.6039822,8.3398952],[-10.6001494,8.3395559],[-10.5959567,8.3377059],[-10.5922483,8.337641],[-10.5874582,8.3374463],[-10.5858027,8.3374209],[-10.5814301,8.3337155],[-10.5772851,8.3340512],[-10.5769546,8.3335325],[-10.5760256,8.3290134],[-10.5743933,8.323879],[-10.5734199,8.3172864],[-10.5723139,8.3145628],[-10.5723755,8.3118645],[-10.5724262,8.3089217],[-10.5703406,8.3086854],[-10.5677347,8.3074485],[-10.5671014,8.3075126],[-10.5658931,8.3088847],[-10.5615881,8.3117726],[-10.5603245,8.311813],[-10.5588075,8.3092284],[-10.5571789,8.3086261],[-10.5562283,8.3056151],[-10.55253,8.3083754],[-10.5485688,8.3097299],[-10.5424925,8.3092041],[-10.5405431,8.3118034],[-10.5366277,8.3141573],[-10.5289369,8.3192237],[-10.5242655,8.3232446],[-10.5201763,8.3260432],[-10.5175531,8.328042],[-10.511183,8.3337497],[-10.5085963,8.3345254],[-10.5068145,8.3368852],[-10.5034113,8.3405368],[-10.4982326,8.3421748],[-10.496332,8.3446318],[-10.4932964,8.347315],[-10.4907614,8.3500564],[-10.4891657,8.3531915],[-10.4868169,8.35793],[-10.4834021,8.3604096],[-10.4797637,8.3629047],[-10.4790133,8.3645246],[-10.482053,8.3664157],[-10.4823213,8.3696851],[-10.4812269,8.3719565],[-10.4782165,8.3767155],[-10.4750379,8.3792583],[-10.4710687,8.3803346],[-10.4692274,8.3809935],[-10.4678744,8.3819323],[-10.4655371,8.3840042],[-10.4634643,8.3855756],[-10.4629548,8.3899021],[-10.4615377,8.390413],[-10.4568252,8.3904267],[-10.454726,8.3908689],[-10.4497925,8.3942004],[-10.4474266,8.3971183],[-10.4463476,8.3989767],[-10.4443382,8.4003301],[-10.4407711,8.403512],[-10.4382996,8.4046159],[-10.4371017,8.4062051],[-10.4339959,8.4100681],[-10.4311495,8.4116386],[-10.4292496,8.4155424],[-10.4286806,8.4181346],[-10.4265369,8.4203481],[-10.4249247,8.4245399],[-10.4229972,8.4283949],[-10.4194506,8.4335535],[-10.4162727,8.436817],[-10.4127403,8.441233],[-10.4093096,8.4411243],[-10.4069303,8.4425241],[-10.4030132,8.4457884],[-10.3994479,8.4496777],[-10.3943001,8.4576305],[-10.3936959,8.4606995],[-10.394001,8.4631763],[-10.3943695,8.4647763],[-10.3939966,8.4665881],[-10.3940503,8.4676735],[-10.393735,8.4688409],[-10.3930851,8.4709843],[-10.3906092,8.4742139],[-10.3900479,8.4765406],[-10.3899394,8.4773595],[-10.3896121,8.4781545],[-10.3889974,8.4790071],[-10.3889574,8.4796474],[-10.3893102,8.4802734],[-10.3895356,8.4809963],[-10.3892884,8.4816584],[-10.3883173,8.4826512],[-10.3877534,8.4836368],[-10.3871861,8.4861478],[-10.3866841,8.4872198],[-10.3857931,8.4881839],[-10.3845637,8.4888135],[-10.3840253,8.4891984],[-10.3836759,8.4903794],[-10.3832362,8.4907204],[-10.3826472,8.4909976],[-10.382053,8.490906],[-10.380353,8.4901728],[-10.3796295,8.4896434],[-10.3793276,8.4888665],[-10.3782945,8.4861036],[-10.376716,8.4830927],[-10.3752904,8.4808192],[-10.3751776,8.4804145],[-10.3751994,8.480026],[-10.3751158,8.4798749],[-10.3749375,8.479882],[-10.3712119,8.4835261],[-10.3685146,8.4860925],[-10.3678599,8.4864918],[-10.3664159,8.4868337],[-10.3645392,8.4867366],[-10.3632225,8.4864092],[-10.3622842,8.4865963],[-10.3614149,8.4865962],[-10.3588765,8.4854486],[-10.3582218,8.4847113],[-10.3581236,8.4841285],[-10.3584328,8.4832327],[-10.3582945,8.4829557],[-10.3579272,8.4828191],[-10.3572943,8.482837],[-10.3565269,8.483078],[-10.3559268,8.4837436],[-10.3550357,8.4862544],[-10.3546938,8.4878877],[-10.353799,8.4888948],[-10.3524096,8.4894201],[-10.3505256,8.4899237],[-10.3481833,8.4912403],[-10.3453894,8.4935977],[-10.3443968,8.4939896],[-10.343171,8.494466],[-10.3419072,8.4936487],[-10.3403126,8.4936842],[-10.3392273,8.4940506],[-10.3382036,8.4949052],[-10.3369697,8.4974867],[-10.3358442,8.499084],[-10.3347958,8.4998778],[-10.3334485,8.5004166],[-10.33182,8.5006656],[-10.3294769,8.501158],[-10.3281707,8.5019229],[-10.3272627,8.5025601],[-10.3263371,8.5039504],[-10.3251473,8.5053482],[-10.3247145,8.5058564],[-10.3239121,8.5063606],[-10.3230862,8.5063953],[-10.3222133,8.5061519],[-10.3197004,8.5041997],[-10.3176811,8.5025699],[-10.314955,8.5007426],[-10.3127363,8.4997682],[-10.3106331,8.4992451],[-10.3095944,8.4988229],[-10.3086379,8.4983032],[-10.3084901,8.4978322],[-10.3081206,8.4973043],[-10.3070124,8.4969511],[-10.304678,8.4968558],[-10.3038951,8.4968238],[-10.3025248,8.4965595],[-10.3025087,8.4953839],[-10.3018516,8.4940007],[-10.3015411,8.4920253],[-10.3012537,8.4916262],[-10.3008297,8.4914998],[-10.2993783,8.4914884],[-10.298654,8.4914152],[-10.2968472,8.4930305],[-10.294763,8.4934463],[-10.2935321,8.4916702],[-10.2921009,8.4905655],[-10.2910423,8.4908707],[-10.2901369,8.4914144],[-10.2892059,8.4906611],[-10.2884076,8.4885844],[-10.2862055,8.4869828],[-10.2830846,8.4862027],[-10.2799137,8.4849993],[-10.279246,8.4846491],[-10.278739,8.4845081],[-10.278066,8.4845861],[-10.277916,8.4845571],[-10.277602,8.4837071],[-10.27727,8.4825571],[-10.276491,8.4812831],[-10.276294,8.4807631],[-10.275877,8.4802321],[-10.275403,8.4795161],[-10.275412,8.4789371],[-10.275594,8.4781721],[-10.275604,8.4777551],[-10.275695,8.4773851],[-10.275632,8.4764951],[-10.275515,8.4758571],[-10.27522,8.4755341],[-10.274901,8.4748401],[-10.274927,8.4742891],[-10.275053,8.4736521],[-10.275068,8.4732931],[-10.274796,8.4727581],[-10.274611,8.4725211],[-10.275666,8.4720471],[-10.277034,8.4713251],[-10.276844,8.4705511],[-10.277015,8.4698331],[-10.277025,8.4694221],[-10.276953,8.4684201],[-10.27755,8.4679721],[-10.278319,8.4671881],[-10.278577,8.4668511],[-10.278803,8.4663531],[-10.278996,8.4655421],[-10.280653,8.4651431],[-10.281585,8.4647341],[-10.281942,8.4646641],[-10.282235,8.4647441],[-10.282199,8.4644031],[-10.281922,8.4641441],[-10.281817,8.4638431],[-10.281332,8.4633121],[-10.281135,8.4629431],[-10.281082,8.4627461],[-10.280857,8.4625601],[-10.280805,8.4624041],[-10.280591,8.4622021],[-10.280475,8.4620001],[-10.280147,8.4619201],[-10.279767,8.4619151],[-10.279438,8.4620091],[-10.279128,8.4620221],[-10.278597,8.4617861],[-10.277939,8.4612611],[-10.277615,8.4607241],[-10.276824,8.4602811],[-10.276743,8.4600961],[-10.276689,8.4594411],[-10.276333,8.4579951],[-10.27626,8.4569201],[-10.276339,8.4563871],[-10.276332,8.4559181],[-10.276094,8.4553351],[-10.276058,8.4549061],[-10.275715,8.4541201],[-10.275686,8.4538381],[-10.275765,8.4533111],[-10.275663,8.4521301],[-10.274821,8.4499181],[-10.273903,8.4486751],[-10.272029,8.4466031],[-10.271735,8.4458731],[-10.271683,8.4446051],[-10.271814,8.4435211],[-10.27227,8.4420381],[-10.272705,8.4411451],[-10.272805,8.4401951],[-10.273035,8.4397671],[-10.273368,8.4395341],[-10.273803,8.4389071],[-10.274148,8.4387331],[-10.274493,8.4384881],[-10.27502,8.4379431],[-10.275961,8.4368861],[-10.276624,8.4359891],[-10.276663,8.4357861],[-10.27635,8.4349931],[-10.276338,8.4347851],[-10.276492,8.4344841],[-10.277158,8.4340411],[-10.277353,8.4337281],[-10.277352,8.4334501],[-10.27712,8.4329821],[-10.277148,8.4328081],[-10.277442,8.4327261],[-10.278197,8.4328161],[-10.27861,8.4329181],[-10.279001,8.4328011],[-10.279253,8.4324301],[-10.279517,8.4321851],[-10.279928,8.4312461],[-10.280019,8.4308641],[-10.279822,8.4304941],[-10.279741,8.4302511],[-10.279717,8.4299851],[-10.280315,8.4296471],[-10.280348,8.4294391],[-10.280311,8.4287481],[-10.280691,8.4285611],[-10.280966,8.4283521],[-10.281097,8.4280281],[-10.281113,8.4273161],[-10.28118,8.4269401],[-10.28073,8.4263451],[-10.280296,8.4259751],[-10.279403,8.4255391],[-10.278395,8.4254201],[-10.278245,8.4255311],[-10.278154,8.4256991],[-10.277666,8.4257001],[-10.276465,8.4246041],[-10.276204,8.4242001],[-10.276295,8.4236611],[-10.276276,8.4232971],[-10.276051,8.4230371],[-10.275163,8.4229731],[-10.274324,8.4226121],[-10.273792,8.4220091],[-10.27386,8.4210371],[-10.275625,8.4187691],[-10.275543,8.4178641],[-10.275324,8.4170911],[-10.276676,8.4162881],[-10.276633,8.4157171],[-10.27635,8.4153711],[-10.27628,8.4151281],[-10.27629,8.4147291],[-10.276243,8.4143351],[-10.276103,8.4139771],[-10.275918,8.4136591],[-10.275866,8.4134281],[-10.275887,8.4130741],[-10.275944,8.4128721],[-10.276151,8.4126101],[-10.276369,8.4124641],[-10.27676,8.4122891],[-10.276978,8.4119291],[-10.277547,8.4118411],[-10.27772,8.4116781],[-10.277823,8.4114931],[-10.27774,8.4110071],[-10.276662,8.4089911],[-10.277769,8.4084271],[-10.280443,8.4067051],[-10.280262,8.4065681],[-10.280169,8.4064241],[-10.279927,8.4062861],[-10.27961,8.4061941],[-10.279119,8.4058831],[-10.278699,8.4052411],[-10.278669,8.4038391],[-10.278819,8.4021571],[-10.27994,8.4026761],[-10.281088,8.4024631],[-10.281051,8.4016231],[-10.280886,8.4004201],[-10.280724,8.3999921],[-10.280371,8.3995941],[-10.279318,8.3989941],[-10.279091,8.3982971],[-10.279405,8.3976201],[-10.279282,8.3970501],[-10.278807,8.3955541],[-10.278826,8.3950731],[-10.280875,8.3925481],[-10.28354,8.3913641],[-10.285197,8.3915791],[-10.285512,8.3913941],[-10.285559,8.3906801],[-10.286312,8.3903831],[-10.28638,8.3897971],[-10.286021,8.3887451],[-10.287473,8.3876351],[-10.286915,8.3852211],[-10.287507,8.3849011],[-10.287995,8.3847571],[-10.288522,8.3846731],[-10.29028,8.3808291],[-10.290371,8.3802241],[-10.289958,8.3805151],[-10.289785,8.3804741],[-10.289606,8.3803421],[-10.289514,8.3801221],[-10.288884,8.3795101],[-10.288348,8.3793781],[-10.28809,8.3794891],[-10.287582,8.3792941],[-10.287467,8.3791321],[-10.28739,8.3786701],[-10.287423,8.3784901],[-10.28756,8.3784551],[-10.287821,8.3785121],[-10.288225,8.3787481],[-10.288335,8.3787641],[-10.288437,8.3786491],[-10.288512,8.3785211],[-10.288447,8.3778911],[-10.288216,8.3775731],[-10.28822,8.3773301],[-10.287983,8.3770471],[-10.287437,8.3771641],[-10.287234,8.3767131],[-10.287458,8.3765161],[-10.28778,8.3763411],[-10.288009,8.3761551],[-10.288026,8.3758831],[-10.287536,8.3756331],[-10.287215,8.3753591],[-10.286879,8.3748231],[-10.2866,8.3740591],[-10.286204,8.3726601],[-10.287531,8.3715931],[-10.287815,8.3709241],[-10.287923,8.3700441],[-10.288061,8.3699861],[-10.288304,8.3702291],[-10.288787,8.3702971],[-10.288994,8.3700301],[-10.288911,8.3694861],[-10.289154,8.3693751],[-10.289853,8.3686981],[-10.290137,8.3682671],[-10.290574,8.3680711],[-10.290654,8.3677641],[-10.290459,8.3671501],[-10.290745,8.3667311],[-10.291133,8.3667301],[-10.291283,8.3666141],[-10.291305,8.3664341],[-10.29105,8.3660301],[-10.291176,8.3656011],[-10.291406,8.3655491],[-10.291636,8.3655771],[-10.291894,8.3652001],[-10.292314,8.3651521],[-10.292959,8.3652241],[-10.293093,8.3648141],[-10.293057,8.3644041],[-10.294038,8.3636511],[-10.293973,8.3628551],[-10.294227,8.3623831],[-10.294318,8.3619311],[-10.294147,8.3614001],[-10.294088,8.3610371],[-10.294179,8.3608521],[-10.294127,8.3605161],[-10.294348,8.3599231],[-10.294406,8.3598821],[-10.295004,8.3598511],[-10.295217,8.3597871],[-10.295378,8.3596241],[-10.295452,8.3594391],[-10.294758,8.3583811],[-10.294665,8.3581561],[-10.29467,8.3579881],[-10.29483,8.3576871],[-10.295313,8.3571391],[-10.295004,8.3561471],[-10.294422,8.3557131],[-10.293461,8.3553291],[-10.292563,8.3547531],[-10.291943,8.3540181],[-10.291514,8.3537111],[-10.291249,8.3535901],[-10.28998,8.3514301],[-10.290416,8.3508851],[-10.290466,8.3505861],[-10.290148,8.3501471],[-10.290178,8.3498611],[-10.291391,8.3488351],[-10.291936,8.3487081],[-10.292094,8.3484471],[-10.291811,8.3479201],[-10.291728,8.3475621],[-10.292074,8.3473541],[-10.29251,8.3466671],[-10.293108,8.3461431],[-10.29326,8.3458561],[-10.293135,8.3449341],[-10.293553,8.3445801],[-10.293279,8.3442201],[-10.292408,8.3434241],[-10.291744,8.3431331],[-10.291378,8.3431451],[-10.290973,8.3429361],[-10.290586,8.3426591],[-10.289929,8.3425691],[-10.28983,8.3422851],[-10.289864,8.3419961],[-10.289754,8.3416611],[-10.289494,8.3413351],[-10.288548,8.3406431],[-10.28842,8.3404351],[-10.288465,8.3400181],[-10.288711,8.3395591],[-10.289298,8.3392561],[-10.289463,8.3389901],[-10.289716,8.3386991],[-10.289939,8.3382641],[-10.290186,8.3380491],[-10.290317,8.3376441],[-10.290466,8.3374521],[-10.29066,8.3367571],[-10.290923,8.3361371],[-10.290821,8.3351801],[-10.293016,8.3344751],[-10.294714,8.3335891],[-10.295019,8.3327281],[-10.295207,8.3317141],[-10.29499,8.3308141],[-10.294703,8.3303231],[-10.294545,8.3288091],[-10.29534,8.3288671],[-10.295902,8.3281271],[-10.296391,8.3275911],[-10.296521,8.3272131],[-10.296514,8.3268651],[-10.296085,8.3259521],[-10.29519,8.3249771],[-10.294728,8.3246941],[-10.294457,8.3244291],[-10.294341,8.3241511],[-10.294813,8.3236201],[-10.295169,8.3234651],[-10.295445,8.3229291],[-10.296233,8.3219901],[-10.296772,8.3218091],[-10.297698,8.3217851],[-10.298125,8.3216551],[-10.296996,8.3187621],[-10.297777,8.3176761],[-10.29742,8.3175031],[-10.297245,8.3168081],[-10.297252,8.3160501],[-10.298182,8.3141321],[-10.298674,8.3133881],[-10.298298,8.3127931],[-10.297927,8.3120131],[-10.298052,8.3113011],[-10.298517,8.3108231],[-10.298719,8.3102901],[-10.298296,8.3083931],[-10.298803,8.3076951],[-10.29924,8.3075511],[-10.299907,8.3067901],[-10.301046,8.3058121],[-10.302972,8.3048481],[-10.303311,8.3044231],[-10.303473,8.3041361],[-10.303286,8.3030371],[-10.302354,8.3003841],[-10.302186,8.2999851],[-10.301594,8.2989951],[-10.301607,8.2985451],[-10.301743,8.2980911],[-10.301131,8.2974691],[-10.302574,8.2967141],[-10.303976,8.2958531],[-10.304952,8.2953371],[-10.305672,8.2947551],[-10.305926,8.2944171],[-10.306657,8.2938511],[-10.307003,8.2938611],[-10.30905,8.2935021],[-10.309482,8.2925421],[-10.30962,8.2917411],[-10.310888,8.2913201],[-10.311503,8.2909821],[-10.313485,8.2902151],[-10.31471,8.2896791],[-10.315796,8.2886111],[-10.318314,8.2867601],[-10.318866,8.2860981],[-10.320212,8.2847571],[-10.320053,8.2845281],[-10.319877,8.2840271],[-10.318959,8.2832931],[-10.318458,8.2826881],[-10.317454,8.2812431],[-10.317173,8.2806151],[-10.31712,8.2803641],[-10.317443,8.2800811],[-10.317537,8.2798891],[-10.316733,8.2785771],[-10.315796,8.2780991],[-10.315395,8.2772221],[-10.315567,8.2765231],[-10.316253,8.2748851],[-10.315493,8.2725391],[-10.315603,8.2721291],[-10.315865,8.2717031],[-10.315116,8.2702441],[-10.315027,8.2699631],[-10.314996,8.2694231],[-10.315033,8.2688631],[-10.315125,8.2683361],[-10.314439,8.2676811],[-10.314326,8.2668971],[-10.313824,8.2661891],[-10.313727,8.2658931],[-10.313811,8.2651721],[-10.312995,8.2650041],[-10.312007,8.2649661],[-10.311224,8.2648221],[-10.311028,8.2640441],[-10.310667,8.2632811],[-10.310257,8.2616001],[-10.311494,8.2573311],[-10.312096,8.2573291],[-10.311534,8.2569091],[-10.311125,8.2563811],[-10.311336,8.2555711],[-10.310734,8.2550071],[-10.310172,8.2545961],[-10.309328,8.2545721],[-10.307537,8.2549431],[-10.307628,8.2546051],[-10.308875,8.2537961],[-10.308558,8.2536491],[-10.309034,8.2518701],[-10.309741,8.2501751],[-10.309333,8.2498371],[-10.308912,8.2488251],[-10.309122,8.2483151],[-10.309101,8.2476581],[-10.308815,8.2471881],[-10.308289,8.2467431],[-10.308228,8.2459671],[-10.307748,8.2454841],[-10.307292,8.2452201],[-10.307254,8.2448501],[-10.307995,8.2444261],[-10.308259,8.2441371],[-10.308587,8.2435671],[-10.309137,8.2431941],[-10.308932,8.2424991],[-10.308235,8.2411091],[-10.307563,8.2412401],[-10.306994,8.2412661],[-10.306567,8.2415851],[-10.305895,8.2417791],[-10.304918,8.2418711],[-10.302888,8.2417811],[-10.30216,8.2416361],[-10.301373,8.2413431],[-10.301055,8.2409651],[-10.30081,8.2402931],[-10.300713,8.2398131],[-10.300741,8.2394061],[-10.301122,8.2390281],[-10.302376,8.2381731],[-10.30256,8.2377161],[-10.302627,8.2370851],[-10.301627,8.2363921],[-10.301451,8.2360781],[-10.301457,8.2356931],[-10.301624,8.2352341],[-10.301712,8.2348421],[-10.301691,8.2341991],[-10.301279,8.2326141],[-10.300787,8.2317241],[-10.299698,8.2314831],[-10.299075,8.2309731],[-10.298953,8.2305191],[-10.298449,8.2294291],[-10.297979,8.2288571],[-10.297254,8.2282241],[-10.296051,8.2276141],[-10.295877,8.2272971],[-10.295847,8.2243921],[-10.295616,8.2242081],[-10.295226,8.2242641],[-10.29505,8.2241011],[-10.294938,8.2238061],[-10.294916,8.2235401],[-10.295062,8.2232731],[-10.296088,8.2225451],[-10.296156,8.2220981],[-10.295307,8.2209131],[-10.295325,8.2203401],[-10.295585,8.2195961],[-10.295979,8.2188781],[-10.296536,8.2180671],[-10.297641,8.2167431],[-10.298047,8.2161891],[-10.298074,8.2160001],[-10.297383,8.2154751],[-10.297311,8.2152191],[-10.29735,8.2145941],[-10.297845,8.2140091],[-10.299186,8.2128961],[-10.299324,8.2124371],[-10.299404,8.2120001],[-10.299335,8.2116601],[-10.298238,8.2106271],[-10.298332,8.2099761],[-10.298646,8.2096641],[-10.299183,8.2096561],[-10.29933,8.2095671],[-10.29949,8.2091811],[-10.299539,8.2088131],[-10.299313,8.2082821],[-10.299447,8.2072801],[-10.299857,8.2068871],[-10.29982,8.2064511],[-10.300083,8.2061401],[-10.300374,8.2056781],[-10.300767,8.2045161],[-10.300887,8.2038811],[-10.300294,8.2031871],[-10.300397,8.2023471],[-10.300906,8.2014451],[-10.300877,8.2006441],[-10.300671,8.2001731],[-10.3007,8.1995701],[-10.301004,8.1990771],[-10.301856,8.1983371],[-10.302579,8.1982761],[-10.302445,8.1980471],[-10.301694,8.1974361],[-10.301583,8.1972521],[-10.301531,8.1970151],[-10.301604,8.1969711],[-10.301803,8.1969771],[-10.302366,8.1972611],[-10.303127,8.1974581],[-10.304157,8.1975661],[-10.305008,8.1975361],[-10.305876,8.1972551],[-10.306284,8.1973061],[-10.30727,8.1977431],[-10.30772,8.1980711],[-10.308308,8.1982401],[-10.308558,8.1980471],[-10.309041,8.1975431],[-10.309688,8.1975401],[-10.311552,8.1969031],[-10.31222,8.1964821],[-10.314481,8.1954541],[-10.317875,8.1950891],[-10.318904,8.1948931],[-10.317865,8.1934201],[-10.319348,8.1925151],[-10.319444,8.1906511],[-10.319664,8.1896171],[-10.319927,8.1890011],[-10.320545,8.1882311],[-10.321435,8.1866621],[-10.322014,8.1860361],[-10.323432,8.1849461],[-10.32414,8.1846021],[-10.32514,8.1846541],[-10.325506,8.1843871],[-10.325382,8.1837111],[-10.326315,8.1827031],[-10.326934,8.1823431],[-10.327269,8.1819331],[-10.32743,8.1813891],[-10.327377,8.1808361],[-10.326887,8.1802951],[-10.326986,8.1797111],[-10.327158,8.1794241],[-10.327223,8.1785911],[-10.328232,8.1776601],[-10.328383,8.1772701],[-10.328391,8.1767891],[-10.328786,8.1765851],[-10.329209,8.1761211],[-10.330367,8.1755541],[-10.330703,8.1751941],[-10.330841,8.1739861],[-10.33132,8.1732131],[-10.332098,8.1730181],[-10.332274,8.1728401],[-10.332508,8.1723661],[-10.332474,8.1711531],[-10.332296,8.1706811],[-10.332662,8.1702511],[-10.333176,8.1700421],[-10.333461,8.1698251],[-10.333518,8.1695971],[-10.333737,8.1694791],[-10.333849,8.1693501],[-10.333596,8.1692461],[-10.333578,8.1690491],[-10.333655,8.1689581],[-10.333582,8.1688781],[-10.333318,8.1688591],[-10.333023,8.1684151],[-10.333195,8.1680381],[-10.334715,8.1684121],[-10.334947,8.1674071],[-10.334883,8.1671301],[-10.335077,8.1665961],[-10.33556,8.1664841],[-10.335853,8.1663161],[-10.335979,8.1663391],[-10.336134,8.1662341],[-10.336122,8.1660901],[-10.336433,8.1658801],[-10.33677,8.1646201],[-10.338323,8.1634381],[-10.339153,8.1629561],[-10.339652,8.1629641],[-10.341062,8.1617721],[-10.341672,8.1615241],[-10.342444,8.1613071],[-10.343113,8.1603631],[-10.343254,8.1596741],[-10.343431,8.1581301],[-10.34421,8.1577101],[-10.344545,8.1574221],[-10.344972,8.1565791],[-10.345558,8.1558111],[-10.34646,8.1547951],[-10.348777,8.1539681],[-10.349356,8.1535261],[-10.349769,8.1525111],[-10.350186,8.1521521],[-10.350898,8.1521601],[-10.351497,8.1517071],[-10.35183,8.1511231],[-10.351673,8.1501633],[-10.351963,8.1504861],[-10.352276,8.1504331],[-10.352522,8.1502311],[-10.352922,8.1500281],[-10.353954,8.1500561],[-10.354478,8.1502871],[-10.354926,8.1506411],[-10.355235,8.1510741],[-10.35553,8.1517241],[-10.355824,8.1521571],[-10.356056,8.1523891],[-10.3563046,8.1525829],[-10.3565349,8.1526541],[-10.3567778,8.1526063],[-10.357118,8.1522921],[-10.35738,8.1522601],[-10.357704,8.1524761],[-10.357952,8.1529711],[-10.3581796,8.1531682],[-10.3585407,8.1531908],[-10.3586478,8.1532166],[-10.358754,8.1532931],[-10.3588546,8.153402],[-10.358884,8.1535913],[-10.3587659,8.1537623],[-10.3585615,8.1538122],[-10.358418,8.1538371],[-10.358496,8.1541771],[-10.358697,8.1543781],[-10.3588677,8.1544927],[-10.3590371,8.1545363],[-10.3591882,8.1541592],[-10.3594448,8.1537749],[-10.3594731,8.1536068],[-10.3595688,8.1533661],[-10.359833,8.1532281],[-10.3599151,8.1533115],[-10.3598712,8.1534022],[-10.3597018,8.1535912],[-10.3596803,8.1537284],[-10.3597942,8.1537375],[-10.3598582,8.1538458],[-10.3596064,8.1542558],[-10.359708,8.1543808],[-10.359862,8.1546124],[-10.3601569,8.1546434],[-10.3609872,8.1551108],[-10.361242,8.1555161],[-10.361628,8.1559181],[-10.362493,8.1565661],[-10.363094,8.1569201],[-10.363819,8.1571971],[-10.364466,8.1572721],[-10.364667,8.1574411],[-10.364868,8.1577351],[-10.365116,8.1579051],[-10.366086,8.1578091],[-10.36624,8.1578851],[-10.366534,8.1584581],[-10.366566,8.1587521],[-10.366507,8.1594651],[-10.36603,8.1596531],[-10.365508,8.1600571],[-10.365725,8.1603821],[-10.36708,8.1604391],[-10.36785,8.1603591],[-10.368528,8.1604651],[-10.36953,8.1608961],[-10.370177,8.1608931],[-10.370654,8.1608141],[-10.371009,8.1609061],[-10.371272,8.1611381],[-10.371628,8.1618181],[-10.372092,8.1621571],[-10.372463,8.1624971],[-10.372464,8.1628381],[-10.372356,8.1630711],[-10.372218,8.1631641],[-10.371987,8.1631191],[-10.371354,8.1627021],[-10.371123,8.1626881],[-10.371031,8.1628121],[-10.371047,8.1631531],[-10.371157,8.1636331],[-10.371405,8.1638951],[-10.371837,8.1641261],[-10.372749,8.1652231],[-10.373057,8.1653931],[-10.373412,8.1654071],[-10.373796,8.1653431],[-10.374411,8.1647991],[-10.375333,8.1643471],[-10.37558,8.1643611],[-10.375781,8.1646241],[-10.375952,8.1649491],[-10.376106,8.1649951],[-10.376847,8.1655191],[-10.37717,8.1656731],[-10.377709,8.1655471],[-10.378693,8.1651571],[-10.378938,8.1646911],[-10.379276,8.1644111],[-10.380107,8.1642371],[-10.381,8.1641411],[-10.381216,8.1640321],[-10.381414,8.1635981],[-10.381752,8.1631781],[-10.381967,8.1631001],[-10.383771,8.1636521],[-10.384295,8.1637121],[-10.384787,8.1635551],[-10.385325,8.1631971],[-10.386294,8.1627601],[-10.386616,8.1623411],[-10.386707,8.1619991],[-10.386952,8.1615961],[-10.38729,8.1613621],[-10.38752,8.1610831],[-10.387611,8.1607411],[-10.387548,8.1604161],[-10.387239,8.1599831],[-10.387176,8.1595651],[-10.387251,8.1590381],[-10.387403,8.1584801],[-10.387432,8.1578441],[-10.387599,8.1572711],[-10.387922,8.1569911],[-10.389121,8.1564131],[-10.389428,8.1561801],[-10.389489,8.1559321],[-10.389349,8.1555761],[-10.389472,8.1554831],[-10.389795,8.1555121],[-10.38995,8.1557131],[-10.390244,8.1559441],[-10.390614,8.1560051],[-10.390906,8.1558341],[-10.391059,8.1556941],[-10.391119,8.1551361],[-10.391071,8.1545941],[-10.390915,8.1542691],[-10.390297,8.1535271],[-10.390049,8.1530951],[-10.389709,8.1527701],[-10.389478,8.1526781],[-10.387954,8.1530091],[-10.38743,8.1529801],[-10.386906,8.1527951],[-10.38652,8.1524711],[-10.386241,8.1519451],[-10.386271,8.1517291],[-10.386594,8.1515731],[-10.386979,8.1515871],[-10.387394,8.1514771],[-10.387825,8.1512121],[-10.388085,8.1509321],[-10.388238,8.1505751],[-10.388176,8.1503121],[-10.388314,8.1500791],[-10.388852,8.1498451],[-10.389283,8.1497811],[-10.389592,8.1498891],[-10.389731,8.1501051],[-10.389748,8.1505541],[-10.390026,8.1507091],[-10.390333,8.1505061],[-10.390517,8.1503191],[-10.390671,8.1502571],[-10.390995,8.1504731],[-10.391241,8.1504571],[-10.392336,8.1507781],[-10.392937,8.1509001],[-10.393369,8.1511621],[-10.393677,8.1511761],[-10.394416,8.1510191],[-10.395047,8.1509391],[-10.395325,8.1512011],[-10.395772,8.1512151],[-10.395925,8.1509051],[-10.395939,8.1504871],[-10.39606,8.1500061],[-10.396352,8.1496641],[-10.396813,8.1493841],[-10.397151,8.1492591],[-10.397534,8.1486841],[-10.397471,8.1483591],[-10.397332,8.1481581],[-10.396993,8.1480351],[-10.396884,8.1479111],[-10.396868,8.1476641],[-10.397145,8.1476011],[-10.397408,8.1477401],[-10.397732,8.1480021],[-10.397887,8.1483421],[-10.398258,8.1487901],[-10.399232,8.1496701],[-10.399616,8.1494831],[-10.399647,8.1493121],[-10.3998,8.1491721],[-10.400062,8.1491871],[-10.400201,8.1494501],[-10.400156,8.1496051],[-10.400249,8.1498371],[-10.400419,8.1500371],[-10.400513,8.1504551],[-10.40073,8.1509191],[-10.400885,8.1511211],[-10.4017,8.1509781],[-10.402101,8.1510231],[-10.402453,8.1506041],[-10.402777,8.1504791],[-10.403037,8.1502921],[-10.403313,8.1498571],[-10.403605,8.1496701],[-10.404161,8.1500551],[-10.404531,8.1501471],[-10.40567,8.1500661],[-10.406147,8.1498631],[-10.406625,8.1499071],[-10.40721,8.1497511],[-10.408041,8.1496541],[-10.40858,8.1495441],[-10.409165,8.1496041],[-10.409858,8.1495551],[-10.411319,8.1491171],[-10.411827,8.1490221],[-10.412706,8.1494221],[-10.413292,8.1495281],[-10.414339,8.1495241],[-10.41557,8.1492411],[-10.415924,8.1489451],[-10.416185,8.1487901],[-10.416462,8.1488661],[-10.417003,8.1492211],[-10.417481,8.1494361],[-10.418081,8.1493251],[-10.419699,8.1494741],[-10.420746,8.1494091],[-10.421992,8.1491881],[-10.423086,8.1490911],[-10.424533,8.1491631],[-10.425303,8.1490061],[-10.426411,8.1488781],[-10.426628,8.1491711],[-10.426906,8.1492941],[-10.427361,8.1494275],[-10.4287777,8.1502398],[-10.4298034,8.1509759],[-10.4307265,8.1512551],[-10.4310598,8.15175],[-10.431906,8.152778],[-10.4328291,8.1537933],[-10.4332714,8.1547452],[-10.4337458,8.1550497],[-10.4343035,8.1551195],[-10.4347651,8.154688],[-10.4357074,8.1543644],[-10.4370023,8.1542502],[-10.437842,8.1536474],[-10.4383228,8.1530509],[-10.4391241,8.1529113],[-10.4392652,8.1532349],[-10.4391241,8.1536537],[-10.4392395,8.1541423],[-10.4396562,8.1547388],[-10.4402395,8.155329],[-10.440637,8.1553607],[-10.4411114,8.1550815],[-10.441528,8.154504],[-10.4418165,8.1543263],[-10.442387,8.1544533],[-10.4424547,8.1544683],[-10.4436755,8.1547388],[-10.443996,8.1553988],[-10.444105,8.1557351],[-10.4445089,8.1557985],[-10.4448614,8.1555764],[-10.4451691,8.1554495],[-10.4453999,8.1557097],[-10.4457333,8.1565346],[-10.445932,8.1567694],[-10.4465858,8.1571755],[-10.4470666,8.1577022],[-10.4472269,8.1583812],[-10.447541,8.1590474],[-10.4478807,8.159187],[-10.4482974,8.1590474],[-10.4485218,8.1587936],[-10.4485731,8.1579179],[-10.4487974,8.1572136],[-10.4491885,8.1566488],[-10.4496472,8.1563603],[-10.4498521,8.1561648],[-10.4501613,8.1559362],[-10.4506977,8.1558846],[-10.4512006,8.1560321],[-10.4516588,8.1559694],[-10.4520984,8.1560432],[-10.4525976,8.1561243],[-10.4529627,8.1560653],[-10.4533315,8.1559583],[-10.4536705,8.155903],[-10.4539908,8.1559805],[-10.4543857,8.1560911],[-10.4547918,8.156257],[-10.4551531,8.1562238],[-10.4553617,8.1559694],[-10.4556672,8.1555785],[-10.4558944,8.1554015],[-10.4561031,8.1554458],[-10.4562968,8.1558035],[-10.4563601,8.1563013],[-10.4564681,8.1565705],[-10.4568071,8.156541],[-10.4571163,8.1564709],[-10.4573771,8.156375],[-10.4574702,8.1560542],[-10.4575671,8.1556043],[-10.4577645,8.1555416],[-10.4580476,8.1555601],[-10.4581929,8.1557592],[-10.4583792,8.1559878],[-10.4587517,8.1562497],[-10.4591317,8.1561722],[-10.4593627,8.1560395],[-10.4598842,8.1558072],[-10.4605808,8.1556523],[-10.4609235,8.155667],[-10.4614115,8.1559547],[-10.4617319,8.1561907],[-10.4618325,8.1565963],[-10.4619033,8.1568876],[-10.4618399,8.1571752],[-10.46165,8.1573744],[-10.4614935,8.1576472],[-10.4614898,8.1578796],[-10.4616574,8.158016],[-10.4618995,8.1580086],[-10.4621305,8.1578058],[-10.4624174,8.1575661],[-10.4625962,8.157083],[-10.4628234,8.1566258],[-10.4630805,8.1564193],[-10.4635349,8.1562644],[-10.4640378,8.1562017],[-10.4643992,8.1561169],[-10.4648462,8.1558625],[-10.465364,8.1558514],[-10.465662,8.1559362],[-10.4659116,8.1559325],[-10.4661612,8.1556449],[-10.4665189,8.1552761],[-10.4668653,8.1549627],[-10.4673868,8.154841],[-10.4677668,8.1546603],[-10.4684523,8.154428],[-10.4688509,8.1543432],[-10.4690744,8.1545423],[-10.4694171,8.1549406],[-10.4698194,8.1550696],[-10.4702069,8.1549774],[-10.4704564,8.1546824],[-10.470516,8.1542436],[-10.4704788,8.1539818],[-10.4704527,8.1536831],[-10.4706353,8.1535135],[-10.4708625,8.1534508],[-10.4713878,8.1536389],[-10.4718758,8.153838],[-10.4720881,8.1537015],[-10.4725277,8.1533992],[-10.4727251,8.1531115],[-10.4726096,8.15254],[-10.4726283,8.1522449],[-10.4725277,8.1517176],[-10.4724644,8.1513562],[-10.4726283,8.151146],[-10.4731684,8.1510391],[-10.4738986,8.1508068],[-10.4746399,8.1505339],[-10.4750422,8.1502868],[-10.4756085,8.1499844],[-10.4760927,8.1499955],[-10.4764057,8.1502204],[-10.4768229,8.1502463],[-10.4772438,8.1501246],[-10.4778287,8.1499291],[-10.4781342,8.1499844],[-10.4783763,8.1501246],[-10.4786781,8.1505781],[-10.4790208,8.1509764],[-10.4792443,8.1510612],[-10.4795013,8.1507883],[-10.4797584,8.150486],[-10.4802091,8.150202],[-10.4808797,8.1501024],[-10.4814832,8.1500361],[-10.481893,8.1497816],[-10.4826529,8.1496452],[-10.4834538,8.1493981],[-10.4838077,8.149446],[-10.4843553,8.1495751],[-10.4847279,8.1494018],[-10.4846943,8.1489814],[-10.4848545,8.1485905],[-10.484903,8.1481922],[-10.4847167,8.1476428],[-10.4846981,8.1473994],[-10.4848061,8.1471671],[-10.4854885,8.1470677],[-10.4858759,8.1470677],[-10.4861869,8.1472005],[-10.4864011,8.1472576],[-10.4868798,8.1472207],[-10.4872948,8.1472281],[-10.4876662,8.1472828],[-10.4879823,8.1470795],[-10.4884064,8.1470117],[-10.4888278,8.1469856],[-10.4891149,8.1468317],[-10.4895733,8.1465684],[-10.4899921,8.1464589],[-10.4903793,8.1464015],[-10.4906954,8.1464745],[-10.4910985,8.1464719],[-10.4913882,8.1463754],[-10.4916674,8.1461512],[-10.491915,8.1459426],[-10.4923813,8.1459921],[-10.4928159,8.1460547],[-10.4931663,8.1462242],[-10.4936931,8.1463024],[-10.4942252,8.1462059],[-10.4948574,8.1461068],[-10.4952235,8.1459634],[-10.4954238,8.1457503],[-10.4959416,8.1456434],[-10.49618,8.1458204],[-10.4962545,8.1460158],[-10.4966307,8.1462371],[-10.4971001,8.146167],[-10.4982028,8.1459273],[-10.4988398,8.1459015],[-10.4995476,8.1458536],[-10.5003895,8.1456323],[-10.5011122,8.1454221],[-10.5012389,8.1452156],[-10.5010601,8.1447215],[-10.5012128,8.144467],[-10.5014698,8.1442273],[-10.5021441,8.1440503],[-10.5028519,8.1437885],[-10.5038056,8.1436152],[-10.5043457,8.1434087],[-10.5048524,8.1432206],[-10.5055154,8.1428592],[-10.5058805,8.1425162],[-10.5060407,8.1419963],[-10.5063536,8.1416238],[-10.5070242,8.141185],[-10.5075196,8.1407498],[-10.5080672,8.1403774],[-10.5084062,8.1400344],[-10.5087601,8.1398758],[-10.5091401,8.1396177],[-10.509602,8.139201],[-10.5099708,8.1388322],[-10.5105073,8.1383639],[-10.5110661,8.1379066],[-10.511636,8.1375821],[-10.5122209,8.1369736],[-10.5128765,8.1362914],[-10.5133943,8.1358894],[-10.5139755,8.1353879],[-10.5142884,8.1350228],[-10.5145939,8.1345913],[-10.5151117,8.1343737],[-10.5153613,8.1340566],[-10.5160057,8.1337726],[-10.5163336,8.1334518],[-10.5168924,8.1331678],[-10.5173245,8.1327142],[-10.5176672,8.1323897],[-10.5181329,8.1320504],[-10.5190232,8.1316669],[-10.5197273,8.1311285],[-10.5203196,8.1306306],[-10.5208523,8.1302434],[-10.5212658,8.1298193],[-10.5214148,8.1294948],[-10.5217985,8.1291555],[-10.5220444,8.1289896],[-10.5223722,8.1291076],[-10.522808,8.1293657],[-10.5233333,8.1294653],[-10.5238399,8.1293989],[-10.5243429,8.1291924],[-10.5245738,8.1289084],[-10.5248942,8.1286687],[-10.5251624,8.1283442],[-10.5253375,8.1277984],[-10.5255871,8.1273116],[-10.5258106,8.1266994],[-10.5259931,8.1264118],[-10.5265519,8.1262274],[-10.5272187,8.126113],[-10.5276434,8.1258254],[-10.5280644,8.1254271],[-10.5281575,8.1251431],[-10.5278967,8.1247043],[-10.5276024,8.1246158],[-10.5272336,8.1247338],[-10.5269468,8.124778],[-10.5263396,8.1246268],[-10.5258069,8.1245457],[-10.5253896,8.1243613],[-10.525032,8.1240331],[-10.5246371,8.1236422],[-10.5241715,8.1232291],[-10.523825,8.1229452],[-10.5237207,8.1227055],[-10.5236947,8.1223109],[-10.5237692,8.1216434],[-10.523989,8.1212192],[-10.5243019,8.1208431],[-10.5246073,8.120419],[-10.5249174,8.1201031],[-10.5254353,8.1199261],[-10.5259568,8.1196605],[-10.5262325,8.1192696],[-10.5264485,8.118982],[-10.5267279,8.1190152],[-10.5270557,8.1193212],[-10.5275326,8.1190373],[-10.5281063,8.1186132],[-10.5283633,8.1182112],[-10.5285645,8.1178756],[-10.5288811,8.117374],[-10.5290934,8.1168172],[-10.5292334,8.1164648],[-10.5297287,8.1160215],[-10.530403,8.1155834],[-10.5307507,8.1150149],[-10.5309983,8.114582],[-10.5313566,8.1141804],[-10.5315936,8.1135702],[-10.5315831,8.1131008],[-10.5314198,8.1130226],[-10.5308034,8.1131999],[-10.5305452,8.1128453],[-10.5303134,8.1124854],[-10.5303556,8.112089],[-10.5307823,8.1117969],[-10.5314672,8.1116561],[-10.5317728,8.1113692],[-10.5319045,8.1109989],[-10.531699,8.110493],[-10.5312038,8.1099193],[-10.530756,8.1092621],[-10.5310721,8.1087875],[-10.5317517,8.1082973],[-10.5324892,8.1077079],[-10.5329371,8.1071759],[-10.5334692,8.1069047],[-10.5339749,8.1070403],[-10.5346756,8.1072385],[-10.5348969,8.1076766],[-10.5352393,8.107734],[-10.5357134,8.1073793],[-10.5356186,8.1068317],[-10.5353341,8.1063362],[-10.5356924,8.1056529],[-10.5358557,8.1049123],[-10.5359979,8.1039787],[-10.5364194,8.1032641],[-10.5366565,8.1025079],[-10.5367092,8.1017568],[-10.5367355,8.1010214],[-10.5365616,8.1005363],[-10.5366617,8.1000513],[-10.5374678,8.0990707],[-10.5379367,8.0986691],[-10.5384055,8.0981788],[-10.5390114,8.097918],[-10.5396752,8.0974851],[-10.5406709,8.0960925],[-10.540771,8.095524],[-10.5414032,8.0950128],[-10.542204,8.0944391],[-10.543068,8.0938706],[-10.5433894,8.0931664],[-10.5435316,8.0925979],[-10.5434631,8.0920189],[-10.5432998,8.0914921],[-10.5432102,8.0911635],[-10.5433051,8.0905116],[-10.5434789,8.0902195],[-10.5439847,8.0899795],[-10.5445273,8.0897813],[-10.5452122,8.0894006],[-10.5455072,8.0890824],[-10.5458655,8.0887486],[-10.5462816,8.0884148],[-10.5465661,8.0880132],[-10.547172,8.0873664],[-10.5479359,8.0869648],[-10.5485049,8.0865005],[-10.5485839,8.0859529],[-10.5486629,8.0854521],[-10.5491476,8.0849618],[-10.5497271,8.0846854],[-10.5504168,8.0845099],[-10.5513359,8.0842185],[-10.5514319,8.0837773],[-10.5518344,8.0833345],[-10.5521716,8.0830111],[-10.5528143,8.0827242],[-10.5532832,8.0825156],[-10.5538943,8.0820879],[-10.5544317,8.0815141],[-10.5549269,8.0809247],[-10.5556329,8.0798867],[-10.5560175,8.0793443],[-10.5563599,8.0786244],[-10.5565654,8.0777847],[-10.5569131,8.0775186],[-10.5572936,8.0775943],[-10.5573978,8.0774561],[-10.5576928,8.0768614],[-10.5579246,8.0765641],[-10.5584356,8.0759486],[-10.5588623,8.0753123],[-10.5593207,8.074822],[-10.5594313,8.0743369],[-10.5598844,8.0739248],[-10.5603269,8.0735492],[-10.5604534,8.0729963],[-10.5605271,8.0725373],[-10.5607537,8.0717445],[-10.5608327,8.0709986],[-10.5609486,8.0706491],[-10.5614754,8.0700701],[-10.5618863,8.0696059],[-10.5621972,8.069199],[-10.5625027,8.0687504],[-10.562861,8.0679471],[-10.5630875,8.0670552],[-10.5632192,8.0667943],[-10.5636828,8.0662988],[-10.5639462,8.0658033],[-10.5642255,8.0653756],[-10.5644257,8.0647027],[-10.5645784,8.0642071],[-10.5651247,8.0637014],[-10.5653487,8.0630915],[-10.5655864,8.0627349],[-10.5662231,8.0618799],[-10.5665398,8.0614775],[-10.5670545,8.0612339],[-10.5674046,8.0608057],[-10.567773,8.0603093],[-10.5679996,8.0596478],[-10.5682531,8.059217],[-10.5685923,8.0588619],[-10.5687942,8.0585912],[-10.5688771,8.0582298],[-10.5690575,8.0580444],[-10.5691724,8.0577025],[-10.5693559,8.0574485],[-10.5698317,8.0573851],[-10.5700881,8.0572238],[-10.5701418,8.0570869],[-10.5702887,8.0566335],[-10.5703356,8.0561086],[-10.5704649,8.0557364],[-10.5709551,8.055159],[-10.5710962,8.0550381],[-10.5713921,8.0547566],[-10.5719666,8.0542256],[-10.5723334,8.0538424],[-10.5726705,8.0532947],[-10.5728098,8.052939],[-10.5727372,8.0526367],[-10.5728488,8.0524352],[-10.5730683,8.0521727],[-10.5732817,8.0517454],[-10.5733976,8.051156],[-10.5736663,8.0505926],[-10.5741421,8.0503236],[-10.5746927,8.049705],[-10.5749833,8.0492155],[-10.5750944,8.049112],[-10.5756324,8.0483866],[-10.5757841,8.0480992],[-10.576332,8.0481461],[-10.5770283,8.0482793],[-10.5778704,8.0480731],[-10.578653,8.0481889],[-10.5792809,8.0481283],[-10.5798403,8.0479032],[-10.5805701,8.047727],[-10.5814446,8.0473935],[-10.5817348,8.0473089],[-10.5824509,8.0472086],[-10.5833731,8.0471646],[-10.5842478,8.0471072],[-10.5849786,8.0469325],[-10.5857254,8.0467865],[-10.5865154,8.0465473],[-10.5872093,8.0461971],[-10.5877273,8.0459135],[-10.5884892,8.0454946],[-10.5890752,8.0452764],[-10.5898439,8.0451153],[-10.5905869,8.0449411],[-10.5913781,8.0447276],[-10.5922368,8.0446596],[-10.5929795,8.044604],[-10.5934665,8.0444049],[-10.5938822,8.0442186],[-10.5946776,8.043809],[-10.5951998,8.0434884],[-10.5956751,8.0431378],[-10.5962432,8.0425533],[-10.5964525,8.0423756],[-10.596728,8.0421608],[-10.5976146,8.0419092],[-10.5983377,8.0417827],[-10.5989145,8.0419352],[-10.5998801,8.0421437],[-10.6006552,8.042275],[-10.6012217,8.0422544],[-10.6018081,8.0422371],[-10.60233,8.0421614],[-10.6027326,8.0420627],[-10.6033867,8.0418725],[-10.6038742,8.0414291],[-10.6040183,8.041313],[-10.6041558,8.0412521],[-10.6043529,8.0412016],[-10.604485,8.041135],[-10.604584,8.0410484],[-10.6047872,8.040851],[-10.6051653,8.0405416],[-10.6050091,7.9740901],[-10.6050223,7.9209161],[-10.6050253,7.9084042],[-10.6050392,7.8426989],[-10.6047956,7.7778348],[-10.6047168,7.7766524],[-10.6043319,7.7746257],[-10.6272423,7.7680712],[-10.6287382,7.7669714],[-10.631533,7.7662556],[-10.6386393,7.7690455],[-10.6396639,7.7691966],[-10.6406842,7.7679784],[-10.6431205,7.7685512],[-10.6449581,7.7692263],[-10.6458047,7.7690422],[-10.6460284,7.7685925],[-10.6457634,7.7675693],[-10.6456946,7.7664559],[-10.6464643,7.7660998],[-10.6474967,7.7666726],[-10.6520237,7.7662431],[-10.6534889,7.7637314],[-10.6534544,7.7620794],[-10.6546819,7.7620082],[-10.6555711,7.7612553],[-10.6574486,7.7615172],[-10.6573551,7.762471],[-10.6569531,7.7632766],[-10.6567419,7.7640912],[-10.6570984,7.7652275],[-10.6579099,7.7650459],[-10.6588075,7.7643956],[-10.6588988,7.7576555],[-10.6601935,7.7554921],[-10.6620594,7.7537343],[-10.6626751,7.7530776],[-10.6629501,7.7524783],[-10.6634541,7.752092],[-10.6640894,7.7518681],[-10.6659958,7.7513165],[-10.6677163,7.751258],[-10.6686402,7.7513132],[-10.6696189,7.7515635],[-10.6706701,7.7513031],[-10.6712617,7.7507983],[-10.6707285,7.7502036],[-10.6696719,7.7501199],[-10.6695313,7.7495382],[-10.6696189,7.7488727],[-10.6714853,7.747802],[-10.67324,7.7490882],[-10.6744076,7.7486123],[-10.6755464,7.7473104],[-10.6772416,7.7463329],[-10.6791522,7.7494348],[-10.6799847,7.7501458],[-10.6810436,7.7495552],[-10.6818121,7.7461303],[-10.6871307,7.7421986],[-10.6885212,7.7432007],[-10.6897958,7.744012],[-10.692796,7.7426568],[-10.6919858,7.7409161],[-10.6918039,7.7388942],[-10.69263,7.7383015],[-10.6931941,7.7395589],[-10.696632,7.7403878],[-10.6970373,7.7398166],[-10.6962197,7.7388908],[-10.6964241,7.737907],[-10.6957172,7.7355025],[-10.6970373,7.7352741],[-10.6982063,7.7352853],[-10.6992328,7.7368126],[-10.7007748,7.7364314],[-10.7016442,7.7360223],[-10.7022181,7.734996],[-10.7042653,7.7313348],[-10.7084661,7.7285024],[-10.7074201,7.7259769],[-10.707479,7.7205755],[-10.7089253,7.7196811],[-10.7098243,7.718816],[-10.7105564,7.7173672],[-10.7103697,7.7162189],[-10.709957,7.7145809],[-10.7101734,7.713473],[-10.7106517,7.7127883],[-10.7115138,7.7121961],[-10.7124346,7.7119778],[-10.713251,7.7119896],[-10.7146329,7.7122916],[-10.7154285,7.712372],[-10.7158973,7.7115659],[-10.7159538,7.7109251],[-10.7156498,7.7095148],[-10.7155347,7.7084074],[-10.7159229,7.7078046],[-10.7184232,7.7070879],[-10.7196837,7.7063687],[-10.7202632,7.7057109],[-10.7202086,7.705363],[-10.7192914,7.7053204],[-10.7186804,7.7052819],[-10.718325,7.7049194],[-10.7182196,7.704254],[-10.7188708,7.7035897],[-10.7193952,7.7027823],[-10.7208808,7.7015001],[-10.7223744,7.6999804],[-10.7230426,7.6994581],[-10.7239904,7.6990069],[-10.7247621,7.6985598],[-10.7252391,7.6981442],[-10.7256597,7.6975664],[-10.7261576,7.6969041],[-10.7264402,7.6964321],[-10.7265862,7.6962287],[-10.7268445,7.6957406],[-10.72669,7.6950441],[-10.7267539,7.6945718],[-10.7270175,7.6940521],[-10.7272145,7.6934452],[-10.7273583,7.6926168],[-10.7272092,7.6919123],[-10.7269643,7.6910892],[-10.7268413,7.6905462],[-10.7271394,7.6881982],[-10.7287524,7.6868295],[-10.7297153,7.6871956],[-10.7302134,7.6878302],[-10.731063,7.6879365],[-10.734441,7.6820062],[-10.7372394,7.6834447],[-10.7378043,7.683419],[-10.7386859,7.6827723],[-10.7396603,7.6819702],[-10.7414015,7.6806563],[-10.7426081,7.6794966],[-10.7430628,7.678651],[-10.7435207,7.6774373],[-10.7441765,7.6755251],[-10.7450436,7.6745034],[-10.7461618,7.6738754],[-10.7468572,7.6728863],[-10.7474716,7.6719335],[-10.7479668,7.6707936],[-10.7488086,7.6692976],[-10.7496547,7.6690311],[-10.7508368,7.6680812],[-10.7514889,7.6673166],[-10.7508904,7.6664129],[-10.7498464,7.6663028],[-10.7489093,7.6660443],[-10.7484568,7.665441],[-10.7489146,7.6649836],[-10.7486039,7.6640962],[-10.7481532,7.6635429],[-10.7476206,7.6628793],[-10.7476314,7.6619862],[-10.7478177,7.6616062],[-10.7487079,7.6613945],[-10.7512681,7.661469],[-10.7530637,7.6612938],[-10.7542445,7.6605047],[-10.7553096,7.6599597],[-10.7566993,7.6595112],[-10.7589357,7.658651],[-10.7605172,7.657964],[-10.7612945,7.6577539],[-10.7619654,7.6570731],[-10.7622488,7.6561378],[-10.7625351,7.6553897],[-10.7631049,7.6545981],[-10.7639462,7.6538857],[-10.765288,7.6524028],[-10.7665068,7.6515315],[-10.7669333,7.6510782],[-10.7670558,7.6500069],[-10.767141,7.6485715],[-10.7674142,7.6479365],[-10.7680994,7.647363],[-10.768962,7.6469724],[-10.7695466,7.6471507],[-10.770389,7.6479118],[-10.7712025,7.6490685],[-10.7711771,7.64959],[-10.7710333,7.6502919],[-10.771118,7.651625],[-10.7714912,7.6525136],[-10.7721577,7.653135],[-10.7723979,7.6532513],[-10.7726243,7.6533608],[-10.7729342,7.6535585],[-10.7737276,7.6536218],[-10.7748032,7.6536693],[-10.7753958,7.6535123],[-10.7757616,7.6528988],[-10.7756498,7.6518803],[-10.7751972,7.6503763],[-10.7747337,7.6497746],[-10.7737783,7.6492504],[-10.7731738,7.6485029],[-10.7728032,7.6480171],[-10.773472,7.6472627],[-10.7743027,7.6462072],[-10.7752786,7.6443955],[-10.7754901,7.6435791],[-10.7753144,7.6426292],[-10.7750588,7.6416318],[-10.7752558,7.641009],[-10.7755699,7.6392569],[-10.7755859,7.638782],[-10.7754049,7.6380431],[-10.7754636,7.6376607],[-10.7757939,7.637425],[-10.7761557,7.6371618],[-10.7762462,7.636101],[-10.7765327,7.635631],[-10.7770076,7.6353991],[-10.7777435,7.6353279],[-10.7783601,7.6351933],[-10.7790257,7.6345758],[-10.7799362,7.6334623],[-10.7808627,7.6326496],[-10.7819329,7.6312352],[-10.7823873,7.6303519],[-10.782689,7.6294039],[-10.783147,7.6289078],[-10.7837327,7.6288709],[-10.7841267,7.6282006],[-10.7848296,7.6269287],[-10.7857454,7.6257096],[-10.7869648,7.624443],[-10.7909836,7.6206907],[-10.7914481,7.6199042],[-10.7911553,7.6188698],[-10.7903566,7.6176718],[-10.7893023,7.6168326],[-10.7889828,7.6162362],[-10.7891638,7.6158721],[-10.7896058,7.6154657],[-10.7899597,7.6149221],[-10.7904708,7.6140988],[-10.7906678,7.6127741],[-10.7910406,7.6120088],[-10.7915517,7.6112118],[-10.7921428,7.6104782],[-10.7926965,7.6099293],[-10.7930799,7.6092116],[-10.7932503,7.6087313],[-10.7932077,7.6084146],[-10.792393,7.6084305],[-10.791983,7.6088791],[-10.791408,7.6094596],[-10.7909501,7.6095863],[-10.7904655,7.6095177],[-10.7903324,7.6093066],[-10.7902791,7.6078288],[-10.7903537,7.6062771],[-10.7900768,7.6045301],[-10.7898372,7.6030471],[-10.7894804,7.6024084],[-10.7892142,7.6020126],[-10.7892615,7.6017705],[-10.78931,7.6015218],[-10.7897426,7.6013936],[-10.7904389,7.6014954],[-10.7910246,7.6018015],[-10.7919937,7.6021868],[-10.7925847,7.6021921],[-10.7930799,7.6015482],[-10.7937957,7.6005683],[-10.7940172,7.5993222],[-10.794167,7.599444],[-10.816135,7.6106395],[-10.8313296,7.6014954],[-10.8573774,7.6149425],[-10.8704013,7.6041849],[-10.9002479,7.6144047],[-10.9040465,7.6343057],[-10.9192411,7.6520544],[-10.9002479,7.6778695],[-10.9268383,7.7139004],[-10.9100158,7.7284195],[-10.9105585,7.7424003],[-10.9219544,7.7676722],[-10.9398623,7.7725114],[-10.9518008,7.7676722],[-10.9767633,7.7741244],[-10.977306,7.7918673],[-10.9941285,7.8101471],[-11.025603,7.8531552],[-11.02882,7.8636393],[-11.0414743,7.8709375],[-11.0397122,7.9052965],[-11.0337429,7.9429202],[-10.9994,7.9741226],[-10.9935859,8.0176199],[-10.9779295,8.0477982],[-10.9691661,8.0772623],[-10.9203403,8.132539],[-10.9167839,8.1466212],[-10.9114493,8.1585028],[-10.9018915,8.160043],[-10.8976683,8.1662036],[-10.8976683,8.1840249],[-10.8854432,8.2080054],[-10.883665,8.2322044],[-10.8681057,8.2700399],[-10.8794417,8.2764188],[-10.9041142,8.2766387],[-10.9205626,8.2638809],[-10.9245635,8.2438634],[-10.931454,8.2381439],[-10.9390114,8.2482629],[-10.9503474,8.255522],[-10.9621279,8.2709197],[-10.9612388,8.2834574],[-10.9785763,8.3116108],[-10.9530147,8.3472394],[-10.9472355,8.366372],[-10.9416787,8.3782469],[-10.9254214,8.3866714]]]]}]}
