# Supplementary material
Source: ML conference proceedings conference paper supplement (https://proceedings.neurips.cc/paper_files/paper/2022/hash/9d3faa41886997cfc2128b930077fa49-Abstract.html)
Supplement: Supplementary file 1 [file 9d3faa41886997cfc2128b930077fa49-Supplemental-Conference.zip › code/ebola/map/geojson/kambia.geojson]

{"type":"GeometryCollection","geometries":[{"type":"MultiPolygon","coordinates":[[[[-13.4957761,8.966],[-13.3066584,9.034115],[-13.3012301,9.0360758],[-13.301381,9.039148],[-13.3014551,9.039947],[-13.3019181,9.0419],[-13.3020721,9.043493],[-13.3020721,9.044881],[-13.3018151,9.046063],[-13.3014031,9.04709],[-13.3006841,9.048376],[-13.2997591,9.049249],[-13.2987311,9.0497629],[-13.2970871,9.0500199],[-13.2935921,9.0498139],[-13.2919991,9.0498659],[-13.2894801,9.0502769],[-13.2885041,9.0508939],[-13.2872191,9.052127],[-13.2862431,9.052898],[-13.2841871,9.054337],[-13.2821311,9.055519],[-13.2801271,9.056958],[-13.2779171,9.0593219],[-13.2769921,9.060812],[-13.2763241,9.061686],[-13.2752961,9.062868],[-13.2740631,9.063639],[-13.2725211,9.063948],[-13.2705171,9.063948],[-13.2691291,9.064102],[-13.2672791,9.064616],[-13.2654281,9.064975],[-13.2592611,9.065181],[-13.2561261,9.065027],[-13.2545841,9.065284],[-13.2533511,9.0659],[-13.2522201,9.067031],[-13.2513471,9.068522],[-13.2509351,9.069652],[-13.2507301,9.070834],[-13.2503701,9.0714],[-13.2498051,9.072016],[-13.2493421,9.072376],[-13.2485201,9.072222],[-13.2474411,9.071656],[-13.2460531,9.070423],[-13.2452311,9.069549],[-13.2439981,9.068933],[-13.2427641,9.068573],[-13.2415311,9.068778],[-13.2396291,9.070115],[-13.2337701,9.073147],[-13.2305841,9.074329],[-13.2278091,9.075254],[-13.2252901,9.076179],[-13.2228241,9.07659],[-13.2166051,9.078389],[-13.2133161,9.078594],[-13.2118261,9.078338],[-13.2094621,9.078903],[-13.2081251,9.079879],[-13.2068401,9.081062],[-13.2050931,9.082089],[-13.2033461,9.082552],[-13.2021641,9.083066],[-13.2016501,9.084145],[-13.2015471,9.085687],[-13.2017011,9.086766],[-13.2025751,9.088462],[-13.2029341,9.089798],[-13.2030371,9.091648],[-13.2023181,9.093242],[-13.2014961,9.094577],[-13.2003651,9.095554],[-13.1996461,9.095863],[-13.1983601,9.095863],[-13.1974351,9.095297],[-13.1963051,9.094372],[-13.1947631,9.093704],[-13.1930161,9.093293],[-13.1905491,9.093139],[-13.1885961,9.093498],[-13.1866951,9.094321],[-13.1851011,9.094783],[-13.1828911,9.094577],[-13.1805271,9.093653],[-13.1789851,9.093242],[-13.1777001,9.093036],[-13.1753881,9.091854],[-13.1726641,9.091032],[-13.1721234,9.0906209],[-13.1700951,9.089079],[-13.1683471,9.087588],[-13.1664461,9.085173],[-13.1669601,9.082192],[-13.1663941,9.07952],[-13.1655201,9.078338],[-13.1637731,9.077001],[-13.1614601,9.076179],[-13.1598671,9.075357],[-13.1577601,9.074175],[-13.1560131,9.072838],[-13.1524661,9.069446],[-13.1505651,9.067442],[-13.1490751,9.065592],[-13.1463511,9.061429],[-13.1447571,9.059425],[-13.1429071,9.057626],[-13.1410571,9.056444],[-13.1392581,9.05593],[-13.1369461,9.055365],[-13.1347361,9.054954],[-13.1335541,9.054594],[-13.1321661,9.053823],[-13.1299051,9.0519729],[-13.1281061,9.0509959],[-13.1254851,9.0500709],[-13.1237386,9.0497762],[-13.1222804,9.0495613],[-13.1205334,9.0495103],[-13.1180154,9.0499722],[-13.1179569,9.0499962],[-13.1168844,9.0504352],[-13.1158564,9.0513082],[-13.1150854,9.0520792],[-13.1143664,9.0530562],[-13.1131834,9.0533643],[-13.1120534,9.0532103],[-13.1106144,9.0526443],[-13.1088154,9.0515652],[-13.1072224,9.0510512],[-13.1056294,9.0500752],[-13.1041904,9.0487383],[-13.1026484,9.0477623],[-13.1009524,9.0471453],[-13.0994624,9.0467863],[-13.0986465,9.0467208],[-13.0968924,9.0465803],[-13.0917041,9.0465802],[-13.0898514,9.0465803],[-13.0885664,9.0470423],[-13.0861004,9.0477623],[-13.0848154,9.0480703],[-13.0830674,9.0483283],[-13.0818344,9.0486873],[-13.0807944,9.0494483],[-13.0803954,9.0505372],[-13.0802924,9.0519252],[-13.0810124,9.0556773],[-13.0811144,9.0577323],[-13.0807034,9.0592232],[-13.0799324,9.0607133],[-13.0790074,9.0617413],[-13.0770034,9.0631293],[-13.0755644,9.0645683],[-13.0742274,9.0670863],[-13.0738684,9.0687823],[-13.0739714,9.0702213],[-13.0746904,9.0728423],[-13.0753584,9.0748463],[-13.0751534,9.0761823],[-13.0743304,9.0777763],[-13.0740744,9.0789063],[-13.0738613,9.0794924],[-13.0736634,9.0800373],[-13.0726864,9.0811683],[-13.0712474,9.0825043],[-13.0703911,9.0829881],[-13.0700654,9.0831723],[-13.0686264,9.0835833],[-13.0664674,9.0837373],[-13.0634874,9.0834293],[-13.0611744,9.0834293],[-13.0555816,9.0825336],[-13.0489434,9.0830693],[-13.0467844,9.0833263],[-13.0446774,9.0839943],[-13.0431354,9.0850223],[-13.0424164,9.0857933],[-13.0419534,9.0872323],[-13.0417474,9.0899043],[-13.0422104,9.0923203],[-13.0419024,9.0944783],[-13.0412334,9.0962773],[-13.0404624,9.0973053],[-13.0379964,9.0986933],[-13.0355294,9.0996183],[-13.0331134,9.1008513],[-13.0299274,9.1019303],[-13.0284374,9.1017763],[-13.0266384,9.1011083],[-13.0257134,9.1002343],[-13.0253024,9.0987443],[-13.0250964,9.0975623],[-13.0245824,9.0967403],[-13.0239144,9.0962263],[-13.0227834,9.0963283],[-13.0218074,9.0968943],[-13.0193914,9.0998753],[-13.0184154,9.1014683],[-13.0170274,9.1030613],[-13.0151264,9.1047063],[-13.0125054,9.1062993],[-13.0107064,9.1071723],[-13.0082904,9.1084573],[-13.0069034,9.1095883],[-13.0053614,9.1113353],[-13.0012504,9.1163723],[-13.0001454,9.1186853],[-12.9967274,9.1271643],[-12.9960074,9.1291693],[-12.9955454,9.1302483],[-12.9949284,9.1314813],[-12.9943124,9.1336403],[-12.9937974,9.1363643],[-12.9937464,9.1396533],[-12.9933614,9.1412203],[-12.9925644,9.1440213],[-12.9920504,9.1445093],[-12.9898154,9.1470283],[-12.9882474,9.1485183],[-12.9862944,9.1505223],[-12.9848044,9.1529383],[-12.9822084,9.1576153],[-12.9812064,9.1608013],[-12.9810014,9.1617523],[-12.9807704,9.1656843],[-12.9802304,9.1675853],[-12.9797674,9.1684593],[-12.9792274,9.1691523],[-12.9781484,9.1698463],[-12.9728554,9.1717993],[-12.9641954,9.1745233],[-12.9588764,9.1763223],[-12.9552274,9.1779413],[-12.9526584,9.1791483],[-12.9517584,9.1797653],[-12.9509874,9.1805883],[-12.9502164,9.1834143],[-12.9501144,9.1848023],[-12.9502164,9.1857013],[-12.9518104,9.1935643],[-12.9520674,9.1946693],[-12.9524784,9.1955683],[-12.9530174,9.1961343],[-12.9543024,9.1968533],[-12.9554074,9.1972643],[-12.9564094,9.1978303],[-12.9573344,9.1985753],[-12.9583364,9.1995003],[-12.9593134,9.2007343],[-12.9598784,9.2016073],[-12.9605724,9.2028153],[-12.9612664,9.2042023],[-12.9616264,9.2052823],[-12.9626794,9.2108063],[-12.9639134,9.2151753],[-12.9644784,9.2170003],[-12.9648634,9.2177963],[-12.9659424,9.2196203],[-12.9666831,9.2206872],[-12.9681014,9.2227303],[-12.9712884,9.2270213],[-12.9699774,9.2277923],[-12.9694374,9.2280233],[-12.9680504,9.2282803],[-12.9667654,9.2288463],[-12.9659944,9.2295653],[-12.9644014,9.2319553],[-12.9635534,9.2330083],[-12.9626224,9.2340633],[-12.9621454,9.2349053],[-12.9622394,9.2350583],[-12.9622224,9.2353733],[-12.9620944,9.2356203],[-12.9620014,9.2359773],[-12.9612274,9.2363353],[-12.9605124,9.2369643],[-12.9601894,9.2370493],[-12.9600874,9.2372283],[-12.9596024,9.2387193],[-12.9593824,9.2389743],[-12.9589724,9.2392613],[-12.9587604,9.2395933],[-12.9587774,9.2402233],[-12.9585044,9.2405803],[-12.9585384,9.2408523],[-12.9579434,9.2415763],[-12.9577224,9.2422653],[-12.9576794,9.2425793],[-12.9578414,9.2430303],[-12.9577304,9.2434903],[-12.9575514,9.2438643],[-12.9573814,9.2440683],[-12.9571524,9.2441793],[-12.9569734,9.2443753],[-12.9567094,9.2445283],[-12.9565304,9.2444993],[-12.9563694,9.2446473],[-12.9563434,9.2450213],[-12.9564624,9.2455323],[-12.9563174,9.2461443],[-12.9557224,9.2470293],[-12.9554674,9.2476933],[-12.9551614,9.2481523],[-12.9551124,9.2485313],[-12.9548374,9.2487993],[-12.9548824,9.2501263],[-12.9547684,9.2505993],[-12.9546554,9.2508083],[-12.9544464,9.2510543],[-12.9542954,9.2513573],[-12.9540114,9.2516793],[-12.9538594,9.2521153],[-12.9539354,9.2529293],[-12.9532564,9.2537943],[-12.9529304,9.2546143],[-12.9526704,9.2549523],[-12.9518324,9.2558093],[-12.9513994,9.2563873],[-12.9511834,9.2568323],[-12.9511964,9.2576433],[-12.9513454,9.2581433],[-12.9515294,9.2590303],[-12.9515774,9.2594833],[-12.9514984,9.2598873],[-12.9512904,9.2602123],[-12.9506004,9.2606163],[-12.9503824,9.2611173],[-12.9500944,9.2620073],[-12.9500924,9.2628683],[-12.9498834,9.2630903],[-12.9497404,9.2634162],[-12.9498834,9.2639233],[-12.9493504,9.2653203],[-12.9497294,9.2666083],[-12.9501654,9.2675943],[-12.9511504,9.2690154],[-12.9514534,9.2698104],[-12.9519464,9.2707013],[-12.9522114,9.2710424],[-12.9524194,9.2716104],[-12.9525714,9.2718764],[-12.9531964,9.2721414],[-12.9533664,9.2724254],[-12.9534424,9.2729184],[-12.9533104,9.2735054],[-12.9535374,9.2738464],[-12.9536514,9.2742634],[-12.9536704,9.2745284],[-12.9532154,9.2754374],[-12.9530444,9.2759114],[-12.9530444,9.2762524],[-12.9535374,9.2769914],[-12.9537834,9.2771424],[-12.9539924,9.2774644],[-12.9540114,9.2782034],[-12.9542384,9.2784314],[-12.9544464,9.2787344],[-12.9545224,9.2791124],[-12.9541414,9.2798654],[-12.9543174,9.2804054],[-12.9545474,9.2808104],[-12.9539794,9.2814044],[-12.9539854,9.2817604],[-12.9536984,9.2820474],[-12.9530864,9.2825164],[-12.9525534,9.2825814],[-12.9521104,9.2828414],[-12.9519284,9.2834924],[-12.9516314,9.2835354],[-12.9514854,9.2837784],[-12.9512644,9.2839874],[-12.9500084,9.2837824],[-12.9496844,9.2839304],[-12.9495584,9.2842604],[-12.9487904,9.2850024],[-12.9485954,9.2852634],[-12.9486734,9.2855754],[-12.9485544,9.2858764],[-12.9483654,9.2860664],[-12.9481004,9.2862264],[-12.9476444,9.2862134],[-12.9473714,9.2863304],[-12.9471884,9.2866174],[-12.9470974,9.2871904],[-12.9466034,9.2874764],[-12.9460734,9.2877144],[-12.9449544,9.2884724],[-12.9445944,9.2889274],[-12.9445194,9.2891924],[-12.9443104,9.2893824],[-12.9438374,9.2896094],[-12.9431364,9.2896854],[-12.9428524,9.2897604],[-12.9426434,9.2901014],[-12.9423784,9.2904044],[-12.9419994,9.2906514],[-12.9413934,9.2906894],[-12.9410524,9.2906134],[-12.9404084,9.2903094],[-12.9391764,9.2899884],[-12.9383434,9.2901204],[-12.9380394,9.2900824],[-12.9377744,9.2899884],[-12.9369034,9.2899694],[-12.9365054,9.2897604],[-12.9362404,9.2894954],[-12.9358234,9.2891924],[-12.9354734,9.2892124],[-12.9349734,9.2891444],[-12.9345414,9.2888884],[-12.9341904,9.2883884],[-12.9335544,9.2881994],[-12.9327914,9.2882824],[-12.9320534,9.2885674],[-12.9315414,9.2885674],[-12.9310294,9.2883964],[-12.9294194,9.2871274],[-12.9287464,9.2868344],[-12.9284154,9.2867674],[-12.9277334,9.2867864],[-12.9274114,9.2867294],[-12.9271904,9.2863444],[-12.9273734,9.2859794],[-12.9274504,9.2856544],[-12.9274254,9.2854974],[-12.9272294,9.2852504],[-12.9269554,9.2850424],[-12.9264094,9.2848494],[-12.9262744,9.2846194],[-12.9262334,9.2840654],[-12.9254784,9.2834324],[-12.9249104,9.2831674],[-12.9244554,9.2830914],[-12.9239254,9.2831484],[-12.9238834,9.2835054],[-12.9237274,9.2838054],[-12.9232974,9.2838444],[-12.9227114,9.2835054],[-12.9224124,9.2834404],[-12.9215374,9.2834704],[-12.9210454,9.2832814],[-12.9207614,9.2829974],[-12.9206854,9.2827124],[-12.9205714,9.2817654],[-12.9203824,9.2811214],[-12.9200794,9.2806474],[-12.9187794,9.2798344],[-12.9180704,9.2793214],[-12.9171994,9.2788664],[-12.9164414,9.2782984],[-12.9160434,9.2778444],[-12.9157214,9.2772754],[-12.9157325,9.2768554],[-12.9157404,9.2765584],[-12.9152324,9.2751864],[-12.9148284,9.2748974],[-12.9143784,9.2748284],[-12.9138604,9.2746784],[-12.9135714,9.2744694],[-12.9133244,9.2742824],[-12.9132774,9.2741494],[-12.9132584,9.2737134],[-12.9133724,9.2735054],[-12.9136564,9.2733154],[-12.9140164,9.2732584],[-12.9146794,9.2733344],[-12.9150704,9.2730174],[-12.9152904,9.2726374],[-12.9151174,9.2720603],[-12.9146334,9.2713684],[-12.9143904,9.2709424],[-12.9143094,9.2705034],[-12.9143654,9.2700164],[-12.9144484,9.2697073],[-12.9148054,9.2695264],[-12.9151914,9.2695264],[-12.9159484,9.2695644],[-12.9165744,9.2696974],[-12.9173214,9.2697824],[-12.9176314,9.2687393],[-12.9173474,9.2683503],[-12.9168014,9.2682573],[-12.9155514,9.2685983],[-12.9150394,9.2686553],[-12.9146984,9.2684653],[-12.9145614,9.2680503],[-12.9142404,9.2677313],[-12.9139214,9.2671773],[-12.9138184,9.2665143],[-12.9134864,9.2660403],[-12.9133534,9.2655103],[-12.9130314,9.2651693],[-12.9125094,9.2650113],[-12.9118944,9.2650553],[-12.9115274,9.2652123],[-12.9109654,9.2652443],[-12.9105244,9.2651733],[-12.9101134,9.2654133],[-12.9091184,9.2663193],[-12.9086934,9.2664093],[-12.9084744,9.2663753],[-12.9081514,9.2660174],[-12.9082324,9.2653483],[-12.9084044,9.2650143],[-12.9094704,9.2639752],[-12.9096164,9.2636302],[-12.9096134,9.2632982],[-12.9093624,9.2631343],[-12.9084624,9.2629603],[-12.9079434,9.2627883],[-12.9072704,9.2620223],[-12.9068601,9.2617791],[-12.9052205,9.2641444],[-12.9038885,9.2658008],[-12.9031554,9.266509],[-12.9017979,9.2676834],[-12.8999949,9.2690379],[-12.8992336,9.2700725],[-12.8987658,9.2710515],[-12.896345,9.2729358],[-12.8955526,9.2732436],[-12.8945731,9.2731267],[-12.8937682,9.2727326],[-12.8927638,9.2721906],[-12.8900062,9.27123],[-12.8887331,9.2708412],[-12.8877039,9.2708299],[-12.886506,9.2710762],[-12.8855514,9.271655],[-12.884777,9.2722694],[-12.8841975,9.273336],[-12.8838598,9.2743889],[-12.883631,9.2763611],[-12.8839613,9.2779104],[-12.8844417,9.2789449],[-12.8849342,9.2797175],[-12.8855585,9.2804226],[-12.8868749,9.2813894],[-12.8874365,9.2817773],[-12.8877761,9.2823939],[-12.8879418,9.2830272],[-12.8877422,9.2837415],[-12.8872992,9.2846096],[-12.8866815,9.2854963],[-12.8865692,9.2865554],[-12.8864257,9.2876883],[-12.8859017,9.2885996],[-12.8853698,9.28921],[-12.8850095,9.2893384],[-12.8844729,9.2891106],[-12.8842331,9.2892388],[-12.8833187,9.2897202],[-12.8823143,9.290299],[-12.8816716,9.2910932],[-12.8813596,9.2924355],[-12.8806359,9.2930266],[-12.8796128,9.2935376],[-12.8769237,9.2935007],[-12.8743268,9.2927914],[-12.8739414,9.2926449],[-12.8732105,9.290498],[-12.8717369,9.2895706],[-12.8681102,9.2887141],[-12.8673755,9.2890582],[-12.8669509,9.2895243],[-12.8655845,9.2911867],[-12.8643679,9.2923504],[-12.863744,9.2931386],[-12.8633946,9.2933664],[-12.862883,9.2930955],[-12.8624587,9.2922827],[-12.8620345,9.2917717],[-12.8611751,9.2931119],[-12.8601734,9.2940683],[-12.8582244,9.293709],[-12.8560331,9.2916047],[-12.8544052,9.2880519],[-12.8521371,9.2863201],[-12.8495546,9.2833749],[-12.8484905,9.2812917],[-12.8478396,9.2810715],[-12.8471495,9.2810615],[-12.8453939,9.282093],[-12.8450958,9.2828425],[-12.8450895,9.2837355],[-12.8452335,9.2847182],[-12.8448561,9.2867199],[-12.8433939,9.2886861],[-12.8396807,9.2903373],[-12.8375415,9.2905822],[-12.8350739,9.2898487],[-12.8339302,9.2896561],[-12.8330643,9.2898546],[-12.8293331,9.2922245],[-12.824754,9.2952053],[-12.8240766,9.2954346],[-12.8233122,9.2953727],[-12.8197187,9.2939701],[-12.816247,9.2922809],[-12.813722,9.2909534],[-12.8110303,9.2894312],[-12.8087414,9.2895327],[-12.807216,9.2898904],[-12.8061877,9.2907387],[-12.8055296,9.2916758],[-12.805171,9.2944339],[-12.8045947,9.2953133],[-12.8030844,9.2964065],[-12.8018172,9.2978074],[-12.8005333,9.2990169],[-12.7988469,9.2995518],[-12.7957106,9.2995407],[-12.7901751,9.3003094],[-12.7879401,9.3014528],[-12.785498,9.3035428],[-12.7846895,9.3053617],[-12.7842805,9.3075639],[-12.7843392,9.3096506],[-12.7858161,9.3118126],[-12.7866848,9.3130204],[-12.7871364,9.3142697],[-12.7868316,9.3160897],[-12.7856869,9.317088],[-12.7820582,9.3184088],[-12.7784223,9.3209139],[-12.7776404,9.3219571],[-12.7775928,9.3225332],[-12.7782908,9.3245131],[-12.7781531,9.3264695],[-12.7776051,9.3271858],[-12.7759275,9.3293789],[-12.7749739,9.3308415],[-12.7721045,9.3352424],[-12.7720427,9.3361471],[-12.7718578,9.3388522],[-12.7734562,9.3417364],[-12.7749263,9.3437111],[-12.7748279,9.3446349],[-12.7743386,9.3451517],[-12.7735149,9.3457262],[-12.772341,9.3460381],[-12.7713953,9.34593],[-12.7693486,9.3450404],[-12.7686555,9.3446349],[-12.7680269,9.3444855],[-12.7667574,9.3439525],[-12.7635258,9.3434161],[-12.7606403,9.3435632],[-12.7589495,9.3439112],[-12.7567274,9.3446705],[-12.7539465,9.3449486],[-12.7530848,9.3455295],[-12.7520853,9.3460183],[-12.7512528,9.3459737],[-12.7500234,9.3451069],[-12.7493293,9.344689],[-12.7485727,9.3446785],[-12.7480551,9.3449191],[-12.7478325,9.3450225],[-12.7477518,9.3452136],[-12.7475417,9.3456538],[-12.7469108,9.3471587],[-12.7465469,9.3480267],[-12.7462868,9.3486469],[-12.7459789,9.3499282],[-12.7460059,9.350892],[-12.7460788,9.3519622],[-12.7462887,9.353489],[-12.7472171,9.3562564],[-12.7474437,9.3572326],[-12.7474818,9.3575372],[-12.7477383,9.3588198],[-12.7478641,9.3594493],[-12.7483032,9.3597092],[-12.7488099,9.3600587],[-12.7489569,9.3602261],[-12.7492247,9.3605013],[-12.7494492,9.3609415],[-12.7497217,9.3614763],[-12.7500169,9.362062],[-12.7515045,9.3630089],[-12.7525825,9.3632739],[-12.7532741,9.3637088],[-12.753431,9.3639158],[-12.753521,9.3643015],[-12.7535953,9.3650984],[-12.7537122,9.3655277],[-12.7539889,9.3672333],[-12.7536033,9.3689893],[-12.753543,9.370885],[-12.7532973,9.371886],[-12.7530388,9.3730883],[-12.7530724,9.3738143],[-12.753329,9.3746086],[-12.7536876,9.3757185],[-12.7544127,9.3767578],[-12.7554054,9.3789204],[-12.7560142,9.3814686],[-12.7553771,9.3877023],[-12.7552752,9.3886992],[-12.7553504,9.3917864],[-12.7553592,9.3921483],[-12.7551823,9.3935385],[-12.7549937,9.3941835],[-12.7547811,9.3946655],[-12.7543675,9.3952843],[-12.7542947,9.3953932],[-12.7540647,9.3958162],[-12.7537432,9.3962983],[-12.751271,9.3982828],[-12.7488585,9.3999098],[-12.7467947,9.4005527],[-12.7467932,9.4005525],[-12.742687,9.4003275],[-12.7405739,9.4000048],[-12.7385702,9.3995761],[-12.7364899,9.3991644],[-12.7360459,9.3989784],[-12.7350738,9.3984733],[-12.7340805,9.3978349],[-12.7337319,9.3974819],[-12.7333424,9.396687],[-12.7328476,9.3959326],[-12.7324188,9.3955194],[-12.7319282,9.3952788],[-12.731293,9.3952198],[-12.7296084,9.3948423],[-12.7278287,9.3948108],[-12.7261919,9.3948428],[-12.7244634,9.39497],[-12.7223745,9.3959768],[-12.720794,9.3967075],[-12.7199329,9.3969747],[-12.7195184,9.3969935],[-12.719083,9.3969788],[-12.7185935,9.3968413],[-12.7185258,9.3968324],[-12.7180235,9.3965821],[-12.715298,9.3949666],[-12.7138633,9.3939983],[-12.7133513,9.393371],[-12.7103382,9.3896795],[-12.7082136,9.389234],[-12.7079036,9.389169],[-12.7072228,9.3890263],[-12.7066766,9.3897403],[-12.7059552,9.3906834],[-12.7056651,9.3910626],[-12.7056817,9.3913487],[-12.7058938,9.3950053],[-12.70596,9.3951521],[-12.7080877,9.3998717],[-12.7080897,9.3998761],[-12.7080905,9.3999133],[-12.7081426,9.4024343],[-12.7077889,9.4040146],[-12.7074012,9.4057469],[-12.7069375,9.4078186],[-12.7047071,9.4107045],[-12.7039126,9.4117325],[-12.6994247,9.4148073],[-12.6972678,9.4169453],[-12.6949557,9.4177878],[-12.6924392,9.4169988],[-12.6913759,9.4158926],[-12.6880043,9.4123848],[-12.6874723,9.4114752],[-12.6854142,9.4079562],[-12.6853759,9.4078906],[-12.6851982,9.4078771],[-12.6843707,9.4078144],[-12.6843633,9.4078138],[-12.6831172,9.4084285],[-12.6830409,9.4087954],[-12.6825256,9.4112737],[-12.6824941,9.4114251],[-12.682572,9.4116663],[-12.6841771,9.4167664],[-12.6841375,9.4169755],[-12.6836004,9.4180693],[-12.6834233,9.4185342],[-12.6830461,9.4188589],[-12.6826533,9.4191815],[-12.6812937,9.4194542],[-12.679155,9.4198871],[-12.6791391,9.4198903],[-12.6791034,9.4200353],[-12.6787021,9.4216641],[-12.6786739,9.4217785],[-12.6787317,9.4224981],[-12.6788106,9.42348],[-12.6788203,9.4236003],[-12.6791597,9.423996],[-12.6809405,9.4260727],[-12.6819323,9.4273128],[-12.6826666,9.4282312],[-12.6833228,9.4290789],[-12.6834202,9.4297164],[-12.6833632,9.4303063],[-12.6832553,9.4306218],[-12.682694,9.4315062],[-12.6816638,9.4324052],[-12.6794654,9.4337631],[-12.6780244,9.4343137],[-12.677656,9.4345656],[-12.6773742,9.4346936],[-12.6772473,9.4347513],[-12.6757762,9.4354197],[-12.6749886,9.4357775],[-12.6748367,9.4358465],[-12.6748229,9.4360152],[-12.6747829,9.4365027],[-12.6746727,9.4378462],[-12.6746595,9.4380075],[-12.674687,9.4380615],[-12.6748763,9.4384341],[-12.6753106,9.4392888],[-12.6754537,9.4395703],[-12.6755513,9.4396085],[-12.6790456,9.4413977],[-12.6804492,9.4421249],[-12.6806048,9.442326],[-12.6809118,9.4427228],[-12.6809118,9.4429878],[-12.6810244,9.4440935],[-12.6809118,9.4444131],[-12.680409,9.4451511],[-12.6800758,9.4458904],[-12.6790842,9.4468338],[-12.6787827,9.4469907],[-12.6786105,9.447047],[-12.6778102,9.4482658],[-12.6774384,9.448832],[-12.6772945,9.4493314],[-12.6770673,9.4501197],[-12.6769853,9.4506534],[-12.6768576,9.4521241],[-12.6770527,9.4532648],[-12.6777378,9.4567475],[-12.6778931,9.4581041],[-12.6775271,9.459607],[-12.6773453,9.4598996],[-12.6766032,9.4615656],[-12.6760397,9.4623415],[-12.6756901,9.4626399],[-12.6752009,9.4632125],[-12.672621,9.4654221],[-12.6713149,9.4664735],[-12.6695882,9.4675876],[-12.6675512,9.4684378],[-12.6674193,9.4684983],[-12.6670013,9.4701565],[-12.6669928,9.4702541],[-12.6670115,9.4704447],[-12.667271,9.4714982],[-12.6689731,9.4743211],[-12.6692298,9.4744768],[-12.6700442,9.4759167],[-12.670027,9.4759997],[-12.6694524,9.4774491],[-12.6664902,9.4790699],[-12.6649719,9.4822601],[-12.6647677,9.4827251],[-12.6643173,9.483666],[-12.6640101,9.4842583],[-12.6623236,9.4872425],[-12.6614306,9.4883595],[-12.6610581,9.4889407],[-12.6571898,9.4947121],[-12.6557304,9.4966665],[-12.6539903,9.4989469],[-12.6457902,9.5114183],[-12.6446247,9.513992],[-12.6447569,9.5213273],[-12.6448564,9.5215815],[-12.6451859,9.5220365],[-12.6468787,9.5242308],[-12.6480815,9.5267116],[-12.6487142,9.5274652],[-12.650095,9.5278561],[-12.6519533,9.5295207],[-12.6528579,9.5305782],[-12.6546308,9.5326507],[-12.6549878,9.5334657],[-12.6550243,9.5339883],[-12.6554341,9.5353811],[-12.6554179,9.5355513],[-12.6551658,9.5361935],[-12.6545383,9.5385235],[-12.6539517,9.5399071],[-12.6528013,9.5407628],[-12.6513795,9.5411944],[-12.6512808,9.5412362],[-12.6488936,9.5447411],[-12.6467281,9.5463009],[-12.6449478,9.54724],[-12.6448911,9.5472936],[-12.6446961,9.5473727],[-12.6409669,9.5493398],[-12.6385363,9.5500615],[-12.6359669,9.549823],[-12.635479,9.5497012],[-12.6334239,9.5475128],[-12.632419,9.5470419],[-12.6315372,9.5470663],[-12.6305202,9.547087],[-12.629715,9.5476346],[-12.6290473,9.5483031],[-12.6286296,9.5491654],[-12.6284206,9.5498888],[-12.6282614,9.550734],[-12.6281561,9.5512843],[-12.6284189,9.5527559],[-12.6306999,9.5567956],[-12.6330621,9.5612306],[-12.6336592,9.5638061],[-12.6337009,9.5662313],[-12.6330733,9.5674154],[-12.6322703,9.5684709],[-12.6275532,9.5703501],[-12.62712,9.5707639],[-12.6268539,9.5711272],[-12.6263695,9.572032],[-12.6260851,9.5730987],[-12.6238186,9.5841181],[-12.6228155,9.5897701],[-12.6172566,9.5948659],[-12.6168557,9.5979483],[-12.6173865,9.600996],[-12.6173186,9.6038915],[-12.6163536,9.6049103],[-12.615513,9.6057978],[-12.6137765,9.607007],[-12.6130364,9.6072643],[-12.612243,9.6074935],[-12.6102747,9.6073889],[-12.6089722,9.6068371],[-12.6054863,9.6046724],[-12.604177,9.6038595],[-12.6004007,9.6021058],[-12.5977227,9.6001393],[-12.5973237,9.5999432],[-12.5970514,9.5998211],[-12.5964505,9.5997413],[-12.59352,9.5995996],[-12.5927685,9.5995634],[-12.5914884,9.5997313],[-12.5881986,9.6008817],[-12.5737379,9.5837078],[-12.5401171,9.5871211],[-12.5112085,9.5649817],[-12.4980939,9.5495811],[-12.4856063,9.534916],[-12.4705223,9.5185753],[-12.4413408,9.5010027],[-12.4207716,9.4865641],[-12.4172892,9.4758234],[-12.4157268,9.4715148],[-12.4163211,9.4678148],[-12.4148406,9.4609784],[-12.4130307,9.4567308],[-12.4096751,9.4515434],[-12.4070861,9.4484143],[-12.4054399,9.4469157],[-12.4034526,9.4449232],[-12.4010708,9.4413521],[-12.3997344,9.4390658],[-12.399155,9.436621],[-12.3990201,9.4335973],[-12.3990477,9.4296463],[-12.3998416,9.4259894],[-12.4019767,9.4223698],[-12.4045317,9.4187007],[-12.4048358,9.4179297],[-12.4049512,9.4168667],[-12.4041975,9.4148496],[-12.4022288,9.4132462],[-12.3997604,9.4125345],[-12.3957218,9.4124312],[-12.3931898,9.4128281],[-12.3919259,9.4130262],[-12.3894765,9.413717],[-12.3871077,9.4137774],[-12.3839707,9.4129135],[-12.3801439,9.4111491],[-12.3769012,9.4092174],[-12.3740784,9.4066529],[-12.3716235,9.4029179],[-12.3707505,9.3995696],[-12.3703855,9.3960718],[-12.3712161,9.3928896],[-12.3728307,9.3900334],[-12.3746556,9.3863237],[-12.3759914,9.3830001],[-12.3766726,9.3798614],[-12.3764152,9.3767811],[-12.3756632,9.3745043],[-12.3737156,9.3710012],[-12.3715583,9.3678184],[-12.3689223,9.3649507],[-12.3675879,9.3624093],[-12.3666884,9.3598653],[-12.3670943,9.3574447],[-12.3679091,9.3553258],[-12.3689656,9.353394],[-12.3705482,9.3514558],[-12.3728101,9.3500647],[-12.3752141,9.3496574],[-12.3777156,9.3504603],[-12.3801737,9.3518551],[-12.3810386,9.3528712],[-12.3813028,9.3547263],[-12.380778,9.3572751],[-12.3807517,9.3586298],[-12.3812015,9.3600074],[-12.3823363,9.361582],[-12.3841988,9.3624504],[-12.3859062,9.3629058],[-12.3891242,9.3621105],[-12.3920363,9.3604986],[-12.3934716,9.359549],[-12.3956326,9.3581192],[-12.3970275,9.356827],[-12.3982099,9.3552559],[-12.3994372,9.352896],[-12.3998411,9.34932],[-12.4010187,9.3436461],[-12.4021875,9.3408762],[-12.4048468,9.338393],[-12.4084019,9.3353917],[-12.4108688,9.3334599],[-12.4121981,9.3311702],[-12.4124653,9.3296772],[-12.4125019,9.3280755],[-12.4112256,9.322302],[-12.4107502,9.3195991],[-12.4100986,9.3175095],[-12.4082218,9.313761],[-12.4059066,9.311325],[-12.4031268,9.3091829],[-12.400152,9.3073216],[-12.3970672,9.3060644],[-12.3939766,9.3048385],[-12.392213,9.3037175],[-12.3903881,9.3019348],[-12.3887597,9.2987663],[-12.3877198,9.2945454],[-12.3874935,9.2916879],[-12.3883102,9.2903784],[-12.388553,9.289989],[-12.3897434,9.2887204],[-12.3901807,9.2882543],[-12.3923983,9.2866478],[-12.3958261,9.2857381],[-12.3995081,9.2856398],[-12.404039,9.2867741],[-12.4083648,9.2896606],[-12.411516,9.2925187],[-12.4133499,9.2964326],[-12.415724,9.3013179],[-12.4182646,9.3029706],[-12.4237138,9.3052881],[-12.4242671,9.306064],[-12.4242066,9.3075105],[-12.4231238,9.3108013],[-12.4228147,9.312899],[-12.423372,9.3147158],[-12.4260516,9.3149276],[-12.4286333,9.3134722],[-12.4309838,9.3105769],[-12.4318353,9.307698],[-12.4321723,9.3046668],[-12.4319044,9.3000596],[-12.431379,9.2960629],[-12.430361,9.2888972],[-12.4309241,9.2862765],[-12.4395641,9.2705256],[-12.4397829,9.2680719],[-12.4395741,9.2659277],[-12.4388845,9.262206],[-12.4377106,9.2586816],[-12.4370416,9.2568403],[-12.4366774,9.2544402],[-12.4370327,9.2535405],[-12.4381473,9.2527022],[-12.4395281,9.2521621],[-12.4402897,9.2522247],[-12.4410038,9.252543],[-12.4419714,9.2530887],[-12.4434165,9.2552007],[-12.4445745,9.2569312],[-12.44581,9.2585739],[-12.4506602,9.2637374],[-12.452476,9.2654118],[-12.4545723,9.2668669],[-12.4579332,9.267978],[-12.4608843,9.2685948],[-12.46411,9.2688618],[-12.4675879,9.2685721],[-12.4711355,9.2679127],[-12.4779616,9.2667596],[-12.4803501,9.2669124],[-12.4826008,9.2675239],[-12.4844275,9.2687767],[-12.4852568,9.2705046],[-12.485971,9.2728236],[-12.4877404,9.274305],[-12.4888045,9.2743242],[-12.4895416,9.27296],[-12.4900481,9.2693917],[-12.4900715,9.2648889],[-12.4898343,9.2603451],[-12.4901043,9.2538552],[-12.4920065,9.2492235],[-12.4947601,9.2466148],[-12.4976735,9.2448125],[-12.5006669,9.2442845],[-12.5028567,9.2446078],[-12.5036234,9.2462249],[-12.5042653,9.2503036],[-12.5065703,9.2563382],[-12.5096122,9.261918],[-12.5118201,9.2658626],[-12.5133595,9.26984],[-12.5161394,9.2721036],[-12.519021,9.2734929],[-12.5198654,9.2735811],[-12.520666,9.2733995],[-12.5214656,9.2726265],[-12.5220561,9.2716581],[-12.5222537,9.2711769],[-12.5222418,9.2706112],[-12.5218985,9.2698414],[-12.5211959,9.2674314],[-12.519923,9.2640025],[-12.518443,9.260747],[-12.5183408,9.257428],[-12.5189844,9.2557791],[-12.5215032,9.2540791],[-12.5225292,9.2530345],[-12.524321,9.2509525],[-12.5264468,9.2478576],[-12.5286064,9.2448192],[-12.5305598,9.2420053],[-12.5320389,9.238452],[-12.5323842,9.2362334],[-12.5319688,9.2342397],[-12.5316844,9.2321745],[-12.5318059,9.229995],[-12.53234,9.2279521],[-12.5340155,9.2259019],[-12.5358353,9.2253562],[-12.539406,9.2235144],[-12.5416126,9.2227124],[-12.5458792,9.2241852],[-12.5482405,9.2250606],[-12.5502506,9.2263637],[-12.5512122,9.2276187],[-12.5513619,9.2292672],[-12.5504599,9.2321288],[-12.5494729,9.2333828],[-12.5484135,9.234519],[-12.5452377,9.237795],[-12.5441285,9.2402496],[-12.544163,9.2426143],[-12.5445294,9.244607],[-12.5461672,9.2472072],[-12.5474918,9.2480257],[-12.5486158,9.2482738],[-12.5524331,9.2484805],[-12.5565655,9.2495042],[-12.5574416,9.2495529],[-12.55901,9.2496401],[-12.5613252,9.2493445],[-12.5633038,9.2485096],[-12.5642278,9.2475142],[-12.5635367,9.245411],[-12.5623042,9.2429667],[-12.5614762,9.2410973],[-12.5593743,9.2362546],[-12.5587566,9.2344401],[-12.5582383,9.2324278],[-12.5582283,9.2302319],[-12.5596435,9.2266523],[-12.560588,9.2248787],[-12.5621744,9.2235686],[-12.5676141,9.2224684],[-12.5709314,9.2217863],[-12.574235,9.2214932],[-12.5783261,9.2214679],[-12.5818161,9.2207516],[-12.5851216,9.2195954],[-12.5904432,9.2176364],[-12.5931615,9.2165336],[-12.5958635,9.2158664],[-12.5976536,9.2161129],[-12.5990077,9.2169209],[-12.5989437,9.2192964],[-12.5986406,9.2210909],[-12.6005888,9.2282011],[-12.602419,9.2311362],[-12.6081084,9.2321892],[-12.6129481,9.2325311],[-12.613834,9.2316298],[-12.6139757,9.2279773],[-12.6144782,9.2232637],[-12.6163977,9.2186869],[-12.6239323,9.2095498],[-12.6312219,9.2041091],[-12.6360224,9.2035826],[-12.6371995,9.2043178],[-12.6381182,9.2058675],[-12.6419697,9.208601],[-12.6446332,9.2087746],[-12.6465474,9.2069793],[-12.6516685,9.199897],[-12.6563944,9.1974301],[-12.6580692,9.1942806],[-12.6601329,9.1876497],[-12.6589582,9.1793618],[-12.656469,9.176729],[-12.6527353,9.1714633],[-12.6513678,9.1682311],[-12.6513129,9.1646179],[-12.6522143,9.1560562],[-12.6544928,9.1524766],[-12.6557369,9.1483284],[-12.6566468,9.143203],[-12.6619209,9.1325949],[-12.6663406,9.1313818],[-12.6671023,9.1310482],[-12.6675422,9.130635],[-12.6677882,9.1301063],[-12.6659726,9.1249668],[-12.6634031,9.1212601],[-12.6618029,9.1156425],[-12.6617313,9.1139856],[-12.661638,9.1118228],[-12.6625141,9.1098493],[-12.6646592,9.1083896],[-12.6671985,9.1075511],[-12.674453,9.1071349],[-12.677998,9.1072405],[-12.6852677,9.1062277],[-12.6884269,9.1069924],[-12.6929086,9.1067919],[-12.6958377,9.1041944],[-12.6992208,9.0984158],[-12.7007649,9.0981222],[-12.7017882,9.0966252],[-12.705343,9.0938597],[-12.7069702,9.0917189],[-12.7088055,9.0845089],[-12.7118618,9.0806192],[-12.7139898,9.0780393],[-12.7152797,9.0749912],[-12.7182164,9.0712618],[-12.7244945,9.0659204],[-12.7279275,9.0623284],[-12.7305115,9.0583884],[-12.732301,9.0549503],[-12.7338517,9.0510736],[-12.7344633,9.0473652],[-12.7342916,9.0450554],[-12.7322102,9.0399696],[-12.7290099,9.0362848],[-12.7288474,9.0353599],[-12.7302147,9.0304123],[-12.7319557,9.025828],[-12.7354717,9.0229739],[-12.7394414,9.0200918],[-12.7562268,9.0111256],[-12.75829,9.0078664],[-12.7587996,9.0068812],[-12.7590724,9.0028667],[-12.7530409,8.9957766],[-12.7462949,8.992748],[-12.7440319,8.987781],[-12.7432776,8.9792128],[-12.777954,8.9991347],[-12.8105084,9.0323132],[-12.8326429,9.0281509],[-12.8427726,9.0137],[-12.8471298,9.0144793],[-12.8609969,8.9844344],[-12.8766659,8.951339],[-12.9280297,8.9161207],[-12.9305981,8.9143596],[-12.9133553,8.8960886],[-12.9128016,8.8478719],[-12.9127997,8.8477072],[-12.9127954,8.8473322],[-12.912794,8.847219],[-12.9136139,8.8451751],[-12.9178189,8.8445167],[-12.9218532,8.8438721],[-12.9277883,8.8424992],[-12.9321909,8.8410473],[-12.9379127,8.839678],[-12.9431739,8.8386382],[-12.9535133,8.8359719],[-12.9558995,8.8355062],[-12.9631184,8.8358579],[-12.9651152,8.8366144],[-12.9733044,8.8427772],[-12.9787679,8.8459764],[-12.9858908,8.8489356],[-12.9902009,8.8511749],[-12.9938433,8.8531944],[-12.9971821,8.8553138],[-13.0005571,8.8558961],[-13.0018161,8.8561135],[-13.0087163,8.8558736],[-13.0108623,8.8553919],[-13.0126891,8.8549819],[-13.014083,8.854669],[-13.0160213,8.8542341],[-13.0192353,8.8539171],[-13.0239644,8.853451],[-13.0249594,8.8532671],[-13.0336084,8.8516696],[-13.0419933,8.8500295],[-13.0499275,8.8484321],[-13.0564736,8.8460707],[-13.0639148,8.8451658],[-13.0742448,8.8459011],[-13.0818085,8.8478593],[-13.0895123,8.8471945],[-13.0947207,8.8457524],[-13.1030769,8.8467986],[-13.1067832,8.8473218],[-13.1126923,8.8481559],[-13.1196749,8.8480428],[-13.1222114,8.8480409],[-13.1244459,8.8479922],[-13.1283405,8.8486163],[-13.129845,8.8489216],[-13.1344271,8.8498516],[-13.1372875,8.8504321],[-13.1473686,8.8540798],[-13.1531191,8.8564357],[-13.1585042,8.8588457],[-13.1633807,8.8609239],[-13.165188,8.861837],[-13.179927,8.8702303],[-13.1871631,8.8743509],[-13.4739868,8.874],[-13.4777916,8.882],[-13.4795335,8.886],[-13.481186,8.89],[-13.4827495,8.894],[-13.4842144,8.898],[-13.485583,8.902],[-13.4868574,8.906],[-13.4880395,8.91],[-13.4891308,8.914],[-13.4901329,8.918],[-13.4910472,8.922],[-13.4918748,8.926],[-13.4926168,8.93],[-13.4932742,8.934],[-13.4938479,8.938],[-13.4943384,8.942],[-13.4949318,8.948],[-13.4952374,8.952],[-13.4954616,8.956],[-13.4956045,8.96],[-13.4956664,8.964],[-13.4957761,8.966]]]]}]}
