# Supplementary material
Source: ML conference proceedings conference paper supplement (https://proceedings.neurips.cc/paper_files/paper/2022/hash/9d3faa41886997cfc2128b930077fa49-Abstract.html)
Supplement: Supplementary file 1 [file 9d3faa41886997cfc2128b930077fa49-Supplemental-Conference.zip › code/ebola/map/geojson/kankan.geojson]

{"type":"GeometryCollection","geometries":[{"type":"MultiPolygon","coordinates":[[[[-10.7047203,11.1348186],[-10.705238,11.1351922],[-10.7053453,11.1354054],[-10.7053802,11.1357003],[-10.7051365,11.1365298],[-10.7041892,11.1379897],[-10.7040552,11.1382925],[-10.7040043,11.1386267],[-10.7039961,11.1392214],[-10.7039264,11.1395503],[-10.7038219,11.1397912],[-10.7032746,11.1404267],[-10.7023761,11.1410609],[-10.701499,11.1414925],[-10.701247,11.1416584],[-10.7011638,11.1417926],[-10.701102,11.1419584],[-10.7011236,11.1422321],[-10.7013729,11.1432241],[-10.7013703,11.1438742],[-10.7012522,11.1445268],[-10.7012362,11.1450164],[-10.7013139,11.1455452],[-10.7015446,11.1462452],[-10.7016197,11.1465559],[-10.7016037,11.1467795],[-10.7008776,11.1482555],[-10.7000881,11.1493558],[-10.6994391,11.1497347],[-10.6982321,11.1505295],[-10.6972154,11.1514018],[-10.6967711,11.1516018],[-10.6962902,11.1516427],[-10.6955391,11.1517768],[-10.6946594,11.1519638],[-10.6942222,11.1520795],[-10.6939058,11.1520848],[-10.6936751,11.1520427],[-10.6932807,11.1518663],[-10.6929749,11.1516031],[-10.6926101,11.1513045],[-10.6924158,11.1512125],[-10.6922026,11.1511888],[-10.6919213,11.1512389],[-10.6915388,11.1515339],[-10.6910598,11.1521663],[-10.6909929,11.1523427],[-10.6910437,11.1525768],[-10.6911967,11.1527453],[-10.6913598,11.1528331],[-10.692002,11.1528907],[-10.6927553,11.1530412],[-10.6934745,11.1533851],[-10.6941283,11.1538769],[-10.6945139,11.1544726],[-10.6945601,11.1547452],[-10.6944717,11.1549927],[-10.6942635,11.1553069],[-10.6937769,11.1557031],[-10.693211,11.1560399],[-10.69235,11.1565768],[-10.6913763,11.1575031],[-10.6909419,11.1578558],[-10.6903756,11.1581727],[-10.6896143,11.158301],[-10.6876881,11.1584831],[-10.6853252,11.1590487],[-10.6840673,11.1591741],[-10.6827559,11.1592242],[-10.6819081,11.15909],[-10.6804839,11.1584241],[-10.6800682,11.1583137],[-10.6794915,11.1582136],[-10.6790597,11.1582742],[-10.6786238,11.1583754],[-10.678306,11.158415],[-10.6779519,11.1583688],[-10.6776211,11.1581882],[-10.6770694,11.157782],[-10.6767261,11.1572346],[-10.6764311,11.1562557],[-10.6761951,11.1558716],[-10.6757122,11.1554348],[-10.674921,11.15499],[-10.6746207,11.1549637],[-10.6742666,11.1550058],[-10.6738079,11.1551742],[-10.6729233,11.1557203],[-10.6726483,11.1557789],[-10.6724335,11.1556949],[-10.6712732,11.1545715],[-10.6708414,11.1543453],[-10.6704712,11.154269],[-10.6701762,11.1543084],[-10.6700126,11.1545506],[-10.6699178,11.1550381],[-10.6700072,11.1561136],[-10.6699374,11.1568952],[-10.6699455,11.1574188],[-10.6699026,11.1578215],[-10.6697926,11.1580768],[-10.6694655,11.1583873],[-10.6689906,11.158753],[-10.6683469,11.1592846],[-10.6679687,11.1596819],[-10.6678561,11.1598715],[-10.6677943,11.1601319],[-10.6680791,11.1617552],[-10.66834,11.1623447],[-10.6687102,11.1627791],[-10.6694958,11.1633965],[-10.6707882,11.1642471],[-10.6715522,11.1646277],[-10.6723182,11.1648427],[-10.6747004,11.164921],[-10.6750343,11.1650925],[-10.6752653,11.1654208],[-10.675275,11.1657891],[-10.6749901,11.1660851],[-10.6727199,11.1670982],[-10.6720606,11.1672897],[-10.6716123,11.1673211],[-10.6695373,11.1673006],[-10.6687871,11.1671138],[-10.6677845,11.1670823],[-10.6668567,11.1673816],[-10.6665834,11.16764],[-10.6665492,11.1678759],[-10.6666088,11.1682074],[-10.6668411,11.1685599],[-10.6683138,11.1714652],[-10.6685248,11.1722599],[-10.668646,11.173121],[-10.6688607,11.1734343],[-10.6698077,11.1740563],[-10.6707735,11.1743827],[-10.6719667,11.1745033],[-10.6725458,11.1746742],[-10.6732209,11.1750124],[-10.6734808,11.1753479],[-10.6739554,11.1756441],[-10.6744262,11.1756595],[-10.6750901,11.1754152],[-10.6753073,11.1753311],[-10.675597,11.1753178],[-10.6761168,11.1754886],[-10.6767074,11.1761441],[-10.6769514,11.1766573],[-10.6769783,11.1769178],[-10.6769422,11.1773025],[-10.6765948,11.1780939],[-10.6765465,11.1784308],[-10.676568,11.1787124],[-10.6766699,11.1796648],[-10.676576,11.1801991],[-10.6764525,11.1805964],[-10.6762836,11.1808358],[-10.6759454,11.1810148],[-10.6756667,11.1809962],[-10.6752885,11.1808858],[-10.6747548,11.1806936],[-10.6742452,11.1803412],[-10.6738971,11.1799685],[-10.6733767,11.1794121],[-10.6731911,11.1789991],[-10.6729845,11.1787176],[-10.6727512,11.1785807],[-10.6725151,11.1785571],[-10.67225,11.1786192],[-10.6702834,11.1796754],[-10.6698732,11.1797465],[-10.6695915,11.1797202],[-10.6692236,11.1795794],[-10.6689237,11.1793255],[-10.6688056,11.1791438],[-10.6687413,11.1788755],[-10.6687332,11.1784439],[-10.6687037,11.1782598],[-10.6686152,11.17809],[-10.6684652,11.1779591],[-10.6679647,11.1777043],[-10.6671668,11.1773835],[-10.6667296,11.177123],[-10.6662763,11.1768861],[-10.666043,11.1768547],[-10.6657307,11.1769003],[-10.6648211,11.1773369],[-10.66345,11.1778423],[-10.6632132,11.1778546],[-10.6629745,11.1778124],[-10.6624276,11.1774707],[-10.6613384,11.1764072],[-10.6610004,11.1762468],[-10.660582,11.1761362],[-10.6593705,11.1759423],[-10.6581836,11.1758512],[-10.6574916,11.1759796],[-10.6569637,11.1762416],[-10.6565136,11.1765209],[-10.6543229,11.1774717],[-10.6534312,11.1777019],[-10.6525112,11.1778176],[-10.651433,11.1778492],[-10.6508643,11.1779125],[-10.6503655,11.1780913],[-10.6491263,11.1788333],[-10.6484772,11.1791701],[-10.6479193,11.1793439],[-10.6473051,11.1794675],[-10.6469456,11.1794728],[-10.6465057,11.1794281],[-10.6461651,11.179386],[-10.6459747,11.179407],[-10.6458352,11.1794465],[-10.6454812,11.1795622],[-10.6451727,11.1796307],[-10.6450171,11.1796254],[-10.6448589,11.1795832],[-10.6445629,11.1793231],[-10.6441265,11.1788887],[-10.6433595,11.1781123],[-10.6427748,11.1773966],[-10.6423054,11.176773],[-10.6419165,11.17646],[-10.6415807,11.1762466],[-10.640966,11.1760083],[-10.6401999,11.1759231],[-10.6399558,11.1758626],[-10.6396929,11.1757283],[-10.639119,11.1751021],[-10.6383277,11.1741601],[-10.6377081,11.1736917],[-10.6368149,11.1731391],[-10.6358761,11.1723919],[-10.6356401,11.172334],[-10.6354068,11.1723812],[-10.6351895,11.1724761],[-10.6349775,11.1726471],[-10.6347496,11.1729207],[-10.6347201,11.1732496],[-10.6347549,11.1735734],[-10.6347604,11.173918],[-10.6347148,11.1743074],[-10.6347309,11.174618],[-10.6348006,11.1750468],[-10.6350607,11.1757127],[-10.6353022,11.1764809],[-10.6353934,11.1771703],[-10.635404,11.1780177],[-10.6353504,11.179399],[-10.6351815,11.180149],[-10.6351572,11.1804911],[-10.6352779,11.1807885],[-10.6357823,11.1811962],[-10.6366165,11.1814146],[-10.6373084,11.1814016],[-10.6380043,11.1812297],[-10.6400466,11.1809179],[-10.6411714,11.1808385],[-10.6419967,11.1809393],[-10.6424298,11.1810556],[-10.643263,11.1818225],[-10.6439548,11.1823789],[-10.6445075,11.1829697],[-10.6451243,11.1836908],[-10.6460525,11.1845958],[-10.646318,11.1850617],[-10.6465003,11.1857774],[-10.6465594,11.1863115],[-10.6466243,11.1867612],[-10.6468849,11.1876165],[-10.6475921,11.1892321],[-10.647584,11.189498],[-10.647525,11.1896769],[-10.6473695,11.1899059],[-10.6464655,11.1909687],[-10.6453029,11.191879],[-10.6443712,11.1923241],[-10.6433379,11.1929162],[-10.6427203,11.1933991],[-10.6415187,11.1947803],[-10.640985,11.1950994],[-10.6404413,11.195326],[-10.63976,11.1954628],[-10.6385368,11.1957207],[-10.6382097,11.1956392],[-10.6379951,11.195505],[-10.637751,11.1951812],[-10.6368579,11.1942156],[-10.6352534,11.1930769],[-10.633607,11.1915107],[-10.6321854,11.1904872],[-10.6320191,11.19019],[-10.6317134,11.1890269],[-10.6314183,11.1885691],[-10.6308603,11.1881481],[-10.6293584,11.1876428],[-10.6276632,11.1869429],[-10.6262792,11.1863851],[-10.6252627,11.1861588],[-10.6238329,11.1857274],[-10.6234039,11.1856379],[-10.6230444,11.1856432],[-10.6224651,11.185709],[-10.6219071,11.1859405],[-10.6212684,11.1863047],[-10.620625,11.1869062],[-10.6190641,11.188248],[-10.6183399,11.189269],[-10.6176264,11.1904162],[-10.6171596,11.1914003],[-10.6169666,11.192258],[-10.6166662,11.1947787],[-10.6166045,11.1965915],[-10.6164998,11.1979204],[-10.6163336,11.1986203],[-10.6161619,11.1991516],[-10.6155236,11.2002409],[-10.6153251,11.2009514],[-10.6152019,11.2018329],[-10.6151661,11.203504],[-10.614869,11.2041982],[-10.6145419,11.2046034],[-10.6139842,11.2049486],[-10.6123048,11.2058979],[-10.6114411,11.2060873],[-10.610717,11.2060558],[-10.6099499,11.205982],[-10.6086463,11.2060242],[-10.605991,11.206203],[-10.6048967,11.2064135],[-10.6040759,11.2066714],[-10.6033731,11.2069766],[-10.6027079,11.2071555],[-10.6021983,11.2071397],[-10.6015922,11.2069819],[-10.6003476,11.2062767],[-10.5998702,11.2059795],[-10.5995295,11.2058584],[-10.599103,11.2057742],[-10.598513,11.2057979],[-10.5978371,11.2059241],[-10.5969707,11.2063188],[-10.5963805,11.2064188],[-10.5956591,11.2063293],[-10.5949992,11.206011],[-10.594723,11.2056611],[-10.5944977,11.2053005],[-10.5936689,11.204406],[-10.5932907,11.2042114],[-10.592773,11.2038457],[-10.5921319,11.2031826],[-10.5906595,11.2012987],[-10.5897583,11.2000673],[-10.5895491,11.1993675],[-10.5894149,11.1987307],[-10.5891305,11.197702],[-10.5889079,11.1969837],[-10.5893424,11.1966811],[-10.5898199,11.1961996],[-10.590544,11.1958102],[-10.5912583,11.1953408],[-10.591346,11.1952076],[-10.5913864,11.1950156],[-10.5910403,11.194442],[-10.5908015,11.1934158],[-10.5905425,11.1933599],[-10.5899624,11.1935373],[-10.5896535,11.1934191],[-10.5894926,11.1932316],[-10.5894576,11.1929756],[-10.5895194,11.1926765],[-10.5897823,11.1921265],[-10.5897528,11.1916424],[-10.5900237,11.1911898],[-10.5896267,11.1903189],[-10.5896348,11.19009],[-10.5897635,11.1899532],[-10.5901068,11.1898505],[-10.5901766,11.1896664],[-10.590139,11.1890927],[-10.5900237,11.1889059],[-10.5896992,11.1888296],[-10.5895463,11.1887138],[-10.5895034,11.1885323],[-10.5895489,11.1884139],[-10.5898011,11.1882429],[-10.589852,11.1880929],[-10.5897126,11.1879087],[-10.5896696,11.1876429],[-10.5894229,11.1874035],[-10.5894068,11.1872693],[-10.5895141,11.1870641],[-10.5898869,11.1870062],[-10.5899985,11.1867739],[-10.5893719,11.1865036],[-10.5892351,11.1860129],[-10.5888516,11.1858485],[-10.5884332,11.1847064],[-10.5883527,11.1846222],[-10.5880362,11.1845169],[-10.5876607,11.1845537],[-10.5873978,11.1847907],[-10.5871403,11.1849275],[-10.5865073,11.184917],[-10.5852467,11.1849854],[-10.5842543,11.1844748],[-10.5835944,11.1842749],[-10.5834603,11.1841697],[-10.5831063,11.1842013],[-10.5827576,11.1841592],[-10.5824304,11.1838171],[-10.5818296,11.1834908],[-10.5815989,11.1834908],[-10.581454,11.183354],[-10.581336,11.1831224],[-10.5810785,11.1828488],[-10.5809337,11.1826067],[-10.5808854,11.1824015],[-10.5810088,11.182212],[-10.5809766,11.1819857],[-10.5808961,11.1818699],[-10.5809552,11.18167],[-10.580923,11.1814647],[-10.5807996,11.1812437],[-10.5807138,11.1807858],[-10.5806869,11.1801438],[-10.5805475,11.1798965],[-10.5801237,11.1794018],[-10.5797052,11.1787703],[-10.5796194,11.1783808],[-10.5793566,11.1780282],[-10.5788725,11.1773768],[-10.5788458,11.1773409],[-10.5788188,11.1773045],[-10.5785331,11.1767717],[-10.5782314,11.1763362],[-10.5780114,11.1761586],[-10.5778022,11.1759915],[-10.5776238,11.1757915],[-10.577479,11.1756428],[-10.5772403,11.1753363],[-10.576964,11.1749981],[-10.576673,11.1747126],[-10.5763806,11.1744166],[-10.5760615,11.1741324],[-10.5745769,11.1721707],[-10.5740082,11.1712077],[-10.5736488,11.1701551],[-10.5731419,11.1686157],[-10.57293,11.1682368],[-10.5724686,11.1676053],[-10.5715084,11.1669342],[-10.5693197,11.1656448],[-10.5664122,11.1635713],[-10.5645883,11.1621608],[-10.562464,11.1602451],[-10.5605221,11.1582241],[-10.5593956,11.1557821],[-10.5580866,11.1539294],[-10.5563271,11.1513716],[-10.5558121,11.1503716],[-10.5542886,11.1490137],[-10.553323,11.1476137],[-10.5520034,11.1462768],[-10.5491924,11.1451926],[-10.5477977,11.14494],[-10.5461454,11.1448136],[-10.5445147,11.1450031],[-10.5206537,11.1313183],[-10.5193877,11.1311815],[-10.5190659,11.1308236],[-10.5186474,11.1306867],[-10.5177033,11.1306867],[-10.5169952,11.1305078],[-10.5164695,11.1303077],[-10.5160296,11.1299182],[-10.5152249,11.1294972],[-10.5145168,11.129255],[-10.5130792,11.1284866],[-10.5123818,11.1281497],[-10.5116415,11.1279181],[-10.5105794,11.1273075],[-10.5099571,11.126918],[-10.5087876,11.1257811],[-10.5079186,11.1251073],[-10.5069852,11.1245178],[-10.5061483,11.1241704],[-10.505569,11.1239809],[-10.504657,11.1235283],[-10.5041421,11.1234651],[-10.5029619,11.1235177],[-10.5026186,11.1233493],[-10.5023396,11.1231598],[-10.5018301,11.1231216],[-10.5015847,11.1227716],[-10.5014707,11.1226979],[-10.5013419,11.1226018],[-10.5012078,11.1225584],[-10.501134,11.1224584],[-10.5009409,11.1224045],[-10.5008229,11.1222071],[-10.5006808,11.1221465],[-10.5005225,11.1221347],[-10.5002731,11.1219149],[-10.5002248,11.1218241],[-10.5000531,11.1218886],[-10.4999673,11.1218834],[-10.4998587,11.1217754],[-10.4996307,11.121711],[-10.4992203,11.1215202],[-10.4989574,11.1214873],[-10.4988649,11.1213978],[-10.4984036,11.1213386],[-10.4982386,11.1210833],[-10.4979489,11.1209859],[-10.4979141,11.1209517],[-10.4978363,11.1209675],[-10.4976123,11.1207872],[-10.4975412,11.1207714],[-10.4975546,11.1206582],[-10.4974903,11.1205648],[-10.4970383,11.1204635],[-10.4968023,11.1201858],[-10.4965998,11.1200226],[-10.4963611,11.1200121],[-10.496243,11.1199792],[-10.4960446,11.1197147],[-10.4955349,11.1193041],[-10.4951581,11.1190949],[-10.4948456,11.1189791],[-10.4943172,11.1189304],[-10.4941053,11.1188238],[-10.4940014,11.1187218],[-10.4939149,11.1186863],[-10.4937231,11.1183922],[-10.4935729,11.1182619],[-10.4934602,11.118004],[-10.4933396,11.1180566],[-10.4932564,11.1180395],[-10.493074,11.1179014],[-10.4929506,11.1178737],[-10.4927669,11.1177816],[-10.4926542,11.1176948],[-10.4924799,11.1174513],[-10.4922278,11.1172197],[-10.4919971,11.1171171],[-10.4916987,11.1171039],[-10.4915539,11.1170401],[-10.4915203,11.1169684],[-10.4913829,11.1168776],[-10.4912179,11.1168618],[-10.4911442,11.1167512],[-10.490892,11.1167302],[-10.4907687,11.1165696],[-10.4905501,11.1163709],[-10.4903154,11.1164696],[-10.4899962,11.1164828],[-10.4896877,11.1163486],[-10.4891969,11.1164907],[-10.4888053,11.1166749],[-10.4884298,11.1164117],[-10.4878987,11.1164328],[-10.487373,11.1166065],[-10.4870618,11.1165381],[-10.4858602,11.1160117],[-10.4856698,11.1156379],[-10.4856537,11.1154458],[-10.4852165,11.1148431],[-10.4851628,11.1146799],[-10.4846639,11.1143509],[-10.484393,11.114372],[-10.4841946,11.1144483],[-10.484039,11.1143667],[-10.4838512,11.1143352],[-10.4833389,11.1143799],[-10.4831485,11.1143115],[-10.482832,11.1141167],[-10.482663,11.113943],[-10.4824511,11.1137877],[-10.4821239,11.1136403],[-10.4806566,11.1125798],[-10.4798976,11.111877],[-10.4794389,11.111677],[-10.4784143,11.1110506],[-10.4770103,11.1108296],[-10.4764747,11.1109257],[-10.4758316,11.1111951],[-10.4753421,11.1113627],[-10.4750964,11.1115266],[-10.4748891,11.1118223],[-10.474643,11.1119957],[-10.474263,11.1121928],[-10.4732992,11.1126084],[-10.473006,11.1129014],[-10.4726857,11.1134262],[-10.4719691,11.1142349],[-10.4713164,11.1149167],[-10.4704756,11.1154479],[-10.4701339,11.1156137],[-10.4696483,11.1156947],[-10.4151679,11.1120113],[-10.4148246,11.1120113],[-10.4142238,11.1126535],[-10.413977,11.1127903],[-10.4135264,11.113243],[-10.4131187,11.1134852],[-10.4127968,11.1135483],[-10.4126037,11.1138326],[-10.4123677,11.1140852],[-10.4120566,11.1145379],[-10.4117454,11.115338],[-10.4113806,11.1165276],[-10.4112948,11.1170856],[-10.4111982,11.1173382],[-10.4109944,11.1182647],[-10.411048,11.1194859],[-10.4112841,11.1204017],[-10.411445,11.1207597],[-10.4115094,11.1209913],[-10.4114557,11.1212492],[-10.411504,11.1215703],[-10.4114021,11.1218545],[-10.4114075,11.1225177],[-10.4114504,11.1229283],[-10.4114933,11.1230494],[-10.4116006,11.1238494],[-10.4116542,11.1239705],[-10.4116435,11.1241547],[-10.4118688,11.1247179],[-10.4119332,11.1249811],[-10.4120887,11.1253811],[-10.4120619,11.1255706],[-10.4121048,11.1257128],[-10.4120941,11.1260444],[-10.4120297,11.1261707],[-10.4120458,11.1262865],[-10.4119654,11.1263444],[-10.4117454,11.126697],[-10.4116167,11.1272392],[-10.4116328,11.1274761],[-10.4117508,11.127755],[-10.4118152,11.1283393],[-10.4119171,11.1286972],[-10.4119439,11.1291657],[-10.4121263,11.1297762],[-10.4121102,11.1299447],[-10.4122497,11.1303131],[-10.4123248,11.1306605],[-10.4127486,11.1312763],[-10.41299,11.13145],[-10.4131777,11.131529],[-10.4132957,11.1314237],[-10.4134889,11.1313816],[-10.4141164,11.1314974],[-10.4148674,11.1318132],[-10.4152644,11.1321395],[-10.4156077,11.1326659],[-10.4161871,11.1331501],[-10.4164767,11.1338449],[-10.4173352,11.1352659],[-10.4180325,11.1359291],[-10.4182471,11.1362976],[-10.4186548,11.1365292],[-10.4191698,11.1374345],[-10.4194702,11.1377082],[-10.4197596,11.1380374],[-10.419971,11.1382779],[-10.4202105,11.1385503],[-10.4208542,11.1396661],[-10.4209186,11.1405714],[-10.4217769,11.1411925],[-10.4224635,11.1415925],[-10.4230965,11.1416241],[-10.4240085,11.1419504],[-10.4244698,11.1419188],[-10.4248495,11.1419786],[-10.4253389,11.1420557],[-10.4258431,11.1421399],[-10.4266049,11.1425715],[-10.4269589,11.1424031],[-10.4271842,11.1427925],[-10.4276456,11.1427083],[-10.4279567,11.1430978],[-10.4282356,11.143182],[-10.4294802,11.143182],[-10.4301239,11.1439189],[-10.4305853,11.1440873],[-10.4310466,11.1448557],[-10.4314114,11.1452873],[-10.43198,11.1460873],[-10.4319264,11.1465505],[-10.4322697,11.1470452],[-10.4326345,11.1478242],[-10.4328276,11.1486768],[-10.4332675,11.1489505],[-10.4334069,11.14954],[-10.4336537,11.1499505],[-10.4337717,11.1502453],[-10.4339112,11.1505189],[-10.4341901,11.1509611],[-10.4342867,11.1513926],[-10.4348661,11.1520874],[-10.4353596,11.1526558],[-10.4357244,11.1529084],[-10.4359819,11.1538137],[-10.4366471,11.1548242],[-10.4378701,11.1556452],[-10.4390074,11.1560873],[-10.4398443,11.1568452],[-10.4396726,11.1578346],[-10.4408957,11.1590557],[-10.4414107,11.1590346],[-10.4432346,11.1587188],[-10.4441572,11.1595188],[-10.4452623,11.1594346],[-10.445434,11.1592135],[-10.4457773,11.159203],[-10.4461957,11.1594977],[-10.4460455,11.1601504],[-10.4467965,11.1604872],[-10.4476334,11.160803],[-10.4480196,11.1604767],[-10.4489208,11.1608872],[-10.4496008,11.161178],[-10.4497577,11.1612451],[-10.4504765,11.161424],[-10.4511417,11.1619819],[-10.4518927,11.1622134],[-10.4526652,11.1626976],[-10.4529656,11.1630766],[-10.4534699,11.1636449],[-10.4537274,11.1636871],[-10.4545857,11.1641713],[-10.4554011,11.1649923],[-10.4562165,11.1656028],[-10.4568173,11.166508],[-10.4573752,11.1667606],[-10.4578902,11.1678553],[-10.4583622,11.1683184],[-10.4590274,11.168971],[-10.4597141,11.1694973],[-10.4635227,11.1705078],[-10.4637909,11.1704973],[-10.4641718,11.1707288],[-10.464558,11.1715261],[-10.4659796,11.1724498],[-10.4665375,11.173076],[-10.4672241,11.173476],[-10.4674763,11.1735076],[-10.4680181,11.1734444],[-10.469209,11.1735497],[-10.4694772,11.1736497],[-10.469563,11.1747496],[-10.4695523,11.175339],[-10.4698044,11.1758442],[-10.46974,11.1761231],[-10.4693699,11.1763652],[-10.4692733,11.1765494],[-10.4693484,11.1768704],[-10.4692358,11.1771704],[-10.4680663,11.178023],[-10.4680073,11.1784019],[-10.4681093,11.1787703],[-10.4679161,11.1799017],[-10.4677069,11.1802122],[-10.4671007,11.1804069],[-10.4666179,11.1815779],[-10.4666233,11.1819226],[-10.4665267,11.182112],[-10.4659823,11.1824304],[-10.4656282,11.1829225],[-10.4655263,11.1835645],[-10.4650301,11.1844591],[-10.4645205,11.1851538],[-10.4642147,11.1853116],[-10.4636836,11.1866352],[-10.4631472,11.1872114],[-10.4630774,11.1874666],[-10.463182,11.1879745],[-10.4633752,11.1882455],[-10.4633752,11.1884744],[-10.4631901,11.1889243],[-10.4630935,11.1890322],[-10.4626322,11.1893269],[-10.462077,11.1902242],[-10.4620636,11.1906873],[-10.4621896,11.1909451],[-10.4623988,11.1910398],[-10.4626456,11.1911004],[-10.4627395,11.1912714],[-10.4627368,11.1913766],[-10.4624257,11.191674],[-10.4624203,11.191866],[-10.4622138,11.192287],[-10.4622754,11.1928896],[-10.462085,11.1935237],[-10.4618061,11.1938789],[-10.4617605,11.1943078],[-10.4618812,11.1949419],[-10.4617953,11.1955655],[-10.4616505,11.1959707],[-10.4615834,11.1967863],[-10.4613662,11.1975047],[-10.461098,11.1978309],[-10.4611006,11.1979546],[-10.4612052,11.1982361],[-10.4611731,11.1984282],[-10.4607198,11.1988676],[-10.4604784,11.1990518],[-10.4603738,11.1992991],[-10.4603577,11.200191],[-10.4602316,11.2004778],[-10.4598963,11.2008041],[-10.4595747,11.2008405],[-10.4594323,11.2009514],[-10.4591855,11.2015145],[-10.4590219,11.2016013],[-10.4585794,11.2016908],[-10.4584104,11.2018618],[-10.4582468,11.2025196],[-10.4578042,11.202859],[-10.4575494,11.2035352],[-10.4567206,11.2041798],[-10.4561815,11.2044455],[-10.4557067,11.2053296],[-10.4550791,11.2058084],[-10.4541189,11.2072555],[-10.4537112,11.2075292],[-10.4533786,11.2082185],[-10.4533786,11.2094709],[-10.4531157,11.2098234],[-10.4525632,11.2100708],[-10.4523808,11.210418],[-10.4523647,11.2108706],[-10.4522252,11.2110969],[-10.4520214,11.21116],[-10.4517102,11.2110311],[-10.4514527,11.2108653],[-10.4511791,11.2108337],[-10.4509163,11.2109285],[-10.4508251,11.2110548],[-10.4508331,11.2114126],[-10.4507178,11.2116046],[-10.4501894,11.2118493],[-10.4497898,11.212344],[-10.4495592,11.2124596],[-10.4490603,11.2125175],[-10.4487009,11.2127753],[-10.4486458,11.2132925],[-10.4483817,11.2135752],[-10.4480411,11.2136988],[-10.4478694,11.2137067],[-10.4476816,11.2138541],[-10.447518,11.2141145],[-10.4469119,11.2143118],[-10.4465524,11.2145013],[-10.4466034,11.2146749],[-10.4464371,11.2149117],[-10.4463245,11.2150248],[-10.4460294,11.2150512],[-10.4459436,11.2152406],[-10.4457531,11.2154905],[-10.4456566,11.2157378],[-10.4455439,11.2158457],[-10.4452516,11.2159641],[-10.4449646,11.2161456],[-10.4443691,11.2163798],[-10.4440875,11.2163719],[-10.4438112,11.216685],[-10.443197,11.2171086],[-10.4430334,11.2172717],[-10.4427222,11.2175111],[-10.4422314,11.2180031],[-10.4419685,11.2179242],[-10.4413543,11.2182649],[-10.4411599,11.2182938],[-10.4407843,11.2182557],[-10.4404719,11.2182675],[-10.440445,11.2184056],[-10.4401487,11.2184793],[-10.4398791,11.2186424],[-10.4394795,11.2187424],[-10.4392032,11.2191134],[-10.4389725,11.2193581],[-10.4388384,11.2195712],[-10.4386051,11.2197053],[-10.437787,11.2198422],[-10.4374571,11.2199791],[-10.4372237,11.2202264],[-10.4369099,11.2204158],[-10.4366122,11.2206394],[-10.4359014,11.2207578],[-10.4354749,11.2209709],[-10.4352764,11.221163],[-10.4349546,11.2213603],[-10.4347802,11.2214155],[-10.4346837,11.2216575],[-10.4343725,11.2219522],[-10.4340829,11.2220048],[-10.4337932,11.2221626],[-10.4335679,11.2223836],[-10.4332675,11.2225204],[-10.4327632,11.2224573],[-10.432377,11.222552],[-10.4320551,11.2225731],[-10.431862,11.2226152],[-10.4315723,11.2228046],[-10.4314221,11.2230887],[-10.4307462,11.2236465],[-10.4303707,11.223878],[-10.4300488,11.2240359],[-10.4298772,11.2242042],[-10.4294373,11.2244358],[-10.4288901,11.224541],[-10.4285039,11.2244568],[-10.4283751,11.2247725],[-10.4280211,11.225004],[-10.4281713,11.2259091],[-10.4279567,11.2263721],[-10.4275705,11.2268772],[-10.4272915,11.2272561],[-10.4271199,11.2279927],[-10.4268194,11.2286662],[-10.4267551,11.2291714],[-10.4266692,11.2296975],[-10.4264761,11.2300764],[-10.4263259,11.2303921],[-10.4262401,11.2307288],[-10.4258324,11.2313602],[-10.4255105,11.2319706],[-10.4249848,11.2323915],[-10.424899,11.232623],[-10.425135,11.2325704],[-10.4252852,11.2327177],[-10.4257895,11.2325493],[-10.4259289,11.2321916],[-10.4260791,11.23196],[-10.4263581,11.2319916],[-10.4267658,11.2319811],[-10.427152,11.231939],[-10.4276777,11.2319285],[-10.428536,11.2320442],[-10.4293407,11.2324862],[-10.4303814,11.2324757],[-10.43095,11.2327072],[-10.4319371,11.2329703],[-10.43301,11.2329703],[-10.4338146,11.2332544],[-10.4340721,11.2334333],[-10.4344798,11.2336964],[-10.4353596,11.2338542],[-10.4361428,11.2338542],[-10.4368509,11.2339174],[-10.4374303,11.2338332],[-10.4379023,11.2341699],[-10.4381169,11.234675],[-10.4383637,11.2351591],[-10.4387177,11.2354748],[-10.439458,11.23558],[-10.4399837,11.2359799],[-10.4404236,11.2361904],[-10.4405738,11.2364219],[-10.4409922,11.2367902],[-10.4414321,11.2370112],[-10.4417647,11.2369691],[-10.4426552,11.2374006],[-10.4431487,11.2375584],[-10.4433418,11.2377163],[-10.4439856,11.2377478],[-10.4444255,11.2377583],[-10.4448224,11.2378531],[-10.4449404,11.2378846],[-10.4457773,11.2381898],[-10.4462601,11.2383687],[-10.4466141,11.2388001],[-10.4467322,11.2392211],[-10.4467858,11.2393999],[-10.4468287,11.2397156],[-10.4470326,11.2399892],[-10.4474403,11.2402628],[-10.4479231,11.240547],[-10.4483415,11.2409153],[-10.4486955,11.2412836],[-10.4491354,11.2419465],[-10.4493285,11.242378],[-10.4496826,11.242641],[-10.4497684,11.2430409],[-10.4499723,11.2433671],[-10.4502512,11.2435671],[-10.4505302,11.2437565],[-10.451131,11.2441248],[-10.4516674,11.2440406],[-10.452,11.2438406],[-10.4524828,11.2435776],[-10.4529549,11.2437565],[-10.4532982,11.2439669],[-10.4535021,11.2441353],[-10.4536844,11.2443668],[-10.468061,11.2684212],[-10.4679966,11.2687369],[-10.4678035,11.2692209],[-10.4677606,11.2695366],[-10.4676748,11.2699574],[-10.4675675,11.2702731],[-10.4675353,11.2707045],[-10.4673743,11.2709886],[-10.4671812,11.2712727],[-10.4670096,11.2716199],[-10.4669023,11.2717041],[-10.4667842,11.2718303],[-10.466634,11.2720723],[-10.4665053,11.2722828],[-10.4664517,11.2725037],[-10.4664838,11.2727142],[-10.4665911,11.2731035],[-10.4667628,11.2734928],[-10.4668486,11.2737032],[-10.4669774,11.2741346],[-10.4669774,11.2743977],[-10.4668486,11.2745029],[-10.4667628,11.2746397],[-10.4668057,11.2749869],[-10.4668915,11.2753551],[-10.4669666,11.2757971],[-10.4667413,11.2760706],[-10.466795,11.2763126],[-10.4669345,11.2768597],[-10.4670632,11.2771964],[-10.4672456,11.2776384],[-10.4675138,11.2776699],[-10.4676318,11.2779645],[-10.4679215,11.2782696],[-10.4682863,11.2785748],[-10.4684687,11.2789956],[-10.4686725,11.2793429],[-10.4686511,11.2800162],[-10.468694,11.2802793],[-10.4688871,11.280637],[-10.4691661,11.2810053],[-10.4691339,11.2813314],[-10.4694021,11.2814472],[-10.4695845,11.2816471],[-10.4697669,11.2818575],[-10.4699814,11.2820574],[-10.4701638,11.2822994],[-10.4701424,11.2825519],[-10.470078,11.2827834],[-10.4699063,11.2831517],[-10.4701102,11.2833305],[-10.4701424,11.2835304],[-10.4700244,11.2837198],[-10.4699278,11.2839618],[-10.4700029,11.2840986],[-10.4704213,11.284288],[-10.4702819,11.2846036],[-10.4700244,11.284793],[-10.4700136,11.2850771],[-10.470078,11.2854664],[-10.4700995,11.2858241],[-10.4699922,11.286003],[-10.4699707,11.286245],[-10.4700458,11.2863502],[-10.4701531,11.2866342],[-10.4702067,11.2869604],[-10.4704535,11.2869814],[-10.4708719,11.2869814],[-10.4706895,11.2873813],[-10.4703462,11.287518],[-10.4703891,11.2877916],[-10.4706037,11.2880862],[-10.4705286,11.2882861],[-10.4703999,11.2884123],[-10.4703784,11.2885702],[-10.4703677,11.2889489],[-10.4702282,11.289212],[-10.4701638,11.2894434],[-10.4701209,11.2896433],[-10.4700995,11.2898222],[-10.4699922,11.2900537],[-10.4699385,11.2903272],[-10.469842,11.2905902],[-10.469724,11.2907481],[-10.4696596,11.2909374],[-10.4695094,11.2912215],[-10.4694021,11.2913267],[-10.4692948,11.2914319],[-10.4693377,11.2915687],[-10.4693699,11.2917686],[-10.4692948,11.2919264],[-10.4691982,11.2920948],[-10.4691875,11.2924314],[-10.469048,11.292726],[-10.4689729,11.292968],[-10.4687798,11.2932731],[-10.4686511,11.293452],[-10.4685438,11.2938097],[-10.4684258,11.2940096],[-10.4682434,11.2941569],[-10.4680288,11.2942937],[-10.4678249,11.2944094],[-10.467546,11.2945462],[-10.467428,11.2947776],[-10.4673958,11.2949565],[-10.4674709,11.2952195],[-10.467664,11.2953879],[-10.4677606,11.2955509],[-10.4676426,11.2961506],[-10.4676265,11.2963032],[-10.4676479,11.2964873],[-10.4676747,11.2966346],[-10.4676962,11.2967872],[-10.4676855,11.296966],[-10.4677123,11.2972501],[-10.4677337,11.2974395],[-10.4676211,11.297613],[-10.4675299,11.2976814],[-10.4673851,11.2977656],[-10.4672617,11.2978077],[-10.467208,11.2978813],[-10.4671705,11.2979655],[-10.4671168,11.2980917],[-10.4671276,11.2982022],[-10.4671115,11.2983232],[-10.4671061,11.2984021],[-10.4671598,11.2985021],[-10.4673368,11.2987388],[-10.4674977,11.2990176],[-10.4673797,11.2991649],[-10.4673851,11.2992964],[-10.4674977,11.2995647],[-10.4675567,11.299733],[-10.4675353,11.2999697],[-10.4671866,11.3001065],[-10.466913,11.2997856],[-10.4668433,11.2998961],[-10.4668272,11.3002012],[-10.4669023,11.3003327],[-10.4669935,11.3003748],[-10.4668111,11.3005694],[-10.4666609,11.3006378],[-10.4667038,11.3008377],[-10.4666072,11.3008745],[-10.4665214,11.3009166],[-10.4665107,11.3010376],[-10.4665965,11.3011218],[-10.4667145,11.3012743],[-10.4667413,11.3014637],[-10.4666287,11.3016005],[-10.4664946,11.3015847],[-10.4663015,11.3018793],[-10.4661405,11.3020371],[-10.4659152,11.3025526],[-10.4656148,11.3029945],[-10.4652822,11.3030892],[-10.4648852,11.3030365],[-10.4645097,11.3029313],[-10.4642093,11.3030892],[-10.4640591,11.3033522],[-10.4640162,11.3036257],[-10.4639733,11.3037835],[-10.4638016,11.3038151],[-10.4634583,11.3036573],[-10.4633939,11.3038046],[-10.4633832,11.3041097],[-10.4633403,11.3045094],[-10.4630935,11.3046567],[-10.4630292,11.304783],[-10.4629111,11.3049513],[-10.462541,11.305117],[-10.4622486,11.3054484],[-10.4619938,11.3062059],[-10.4616907,11.3063716],[-10.461106,11.3063243],[-10.4608297,11.3065689],[-10.4607171,11.3068371],[-10.4605749,11.3068214],[-10.4601592,11.3067293],[-10.4591614,11.3071659],[-10.4586411,11.3078392],[-10.458582,11.3083126],[-10.4583299,11.3085967],[-10.4578471,11.3086756],[-10.4570434,11.3085819],[-10.4569835,11.3083231],[-10.4567851,11.3079918],[-10.4566,11.3078917],[-10.4562781,11.3078759],[-10.4558704,11.3080128],[-10.4552803,11.3083073],[-10.4540868,11.30912],[-10.4532338,11.3098723],[-10.4530568,11.3101247],[-10.4529924,11.3104115],[-10.4529441,11.3111899],[-10.4527725,11.3125156],[-10.4525472,11.3131362],[-10.452,11.3142461],[-10.4516486,11.3146853],[-10.451359,11.3150036],[-10.4507018,11.3156927],[-10.4503236,11.315953],[-10.4499857,11.3161267],[-10.4495002,11.3162344],[-10.4480625,11.3163897],[-10.4452221,11.3168051],[-10.4431916,11.3168447],[-10.4422153,11.3167709],[-10.4407937,11.3165237],[-10.4393829,11.3159504],[-10.4380418,11.3153035],[-10.4370011,11.3148773],[-10.4354991,11.3144565],[-10.4338093,11.3139411],[-10.4327525,11.3134729],[-10.4321356,11.3132729],[-10.4316367,11.3132624],[-10.4312504,11.3132888],[-10.4308427,11.3134886],[-10.4305155,11.3137174],[-10.4297216,11.3144328],[-10.4277019,11.3164949],[-10.4261033,11.3177598],[-10.4256151,11.3180886],[-10.4254274,11.3182385],[-10.4252074,11.3185253],[-10.4249097,11.3191065],[-10.4245074,11.3196587],[-10.4237671,11.3203873],[-10.4233272,11.3209501],[-10.4214228,11.3238983],[-10.4205538,11.3248084],[-10.4204197,11.3251055],[-10.420366,11.325379],[-10.4204331,11.3258892],[-10.4204894,11.3266019],[-10.4203607,11.3274067],[-10.4200817,11.3280117],[-10.4198028,11.3283377],[-10.4192932,11.3287217],[-10.4185743,11.3290742],[-10.4177267,11.3292635],[-10.4174612,11.3293818],[-10.417362,11.3294817],[-10.4172761,11.3296422],[-10.417193,11.3298499],[-10.4170884,11.3300998],[-10.4169489,11.330247],[-10.4166807,11.3304497],[-10.4164299,11.3305378],[-10.4161174,11.3305207],[-10.4157821,11.3303259],[-10.4153396,11.330042],[-10.4150097,11.3296645],[-10.4147602,11.3289137],[-10.4145832,11.3279065],[-10.4144303,11.3264205],[-10.414154,11.3242666],[-10.4139824,11.3227675],[-10.4139126,11.3225596],[-10.4137839,11.3224045],[-10.4132314,11.3219732],[-10.4129497,11.3215366],[-10.4128156,11.3210659],[-10.4129765,11.3193827],[-10.412947,11.319088],[-10.4128398,11.3187856],[-10.4126118,11.3184437],[-10.4124669,11.3181991],[-10.4124079,11.3179597],[-10.4124361,11.3176612],[-10.4125192,11.3174166],[-10.4125353,11.3172851],[-10.4125112,11.3171392],[-10.4123623,11.3167184],[-10.4122255,11.3164265],[-10.412027,11.3162845],[-10.4118581,11.316245],[-10.411563,11.3162344],[-10.4106243,11.3165133],[-10.4095085,11.316934],[-10.4087065,11.3170998],[-10.4079903,11.3171287],[-10.4074767,11.3171286],[-10.4070247,11.317013],[-10.4052706,11.3162924],[-10.4040743,11.3158373],[-10.4035244,11.3158216],[-10.4031355,11.315982],[-10.4024945,11.3166343],[-10.4021538,11.3172944],[-10.4017891,11.3179743],[-10.4016871,11.3185963],[-10.4014618,11.320574],[-10.4011775,11.3215418],[-10.400346,11.3227544],[-10.3991524,11.3239458],[-10.3989218,11.3243692],[-10.3987555,11.3249083],[-10.3987957,11.326026],[-10.3989781,11.3265021],[-10.3992866,11.3272332],[-10.3994341,11.3277145],[-10.3995092,11.328656],[-10.3994555,11.3298105],[-10.3991766,11.3314306],[-10.3993322,11.3343972],[-10.399241,11.3348232],[-10.3990264,11.3351388],[-10.3986133,11.3353334],[-10.397975,11.3351756],[-10.3975082,11.3348653],[-10.3966714,11.3341498],[-10.3959955,11.3333768],[-10.3955449,11.3326036],[-10.3951184,11.3321433],[-10.3938309,11.3313858],[-10.3930236,11.3309704],[-10.3919185,11.3306022],[-10.3909637,11.3302891],[-10.3906445,11.3300894],[-10.3902207,11.3297212],[-10.388394,11.3281274],[-10.3876404,11.3275199],[-10.3872649,11.3273331],[-10.3868009,11.3272674],[-10.3858809,11.3272227],[-10.3851325,11.3272778],[-10.3838022,11.3276803],[-10.3831799,11.328038],[-10.3826456,11.3285307],[-10.3824611,11.3289269],[-10.3823216,11.3293635],[-10.3822733,11.3309467],[-10.3821499,11.3325982],[-10.381769,11.3340132],[-10.381584,11.3345655],[-10.3812702,11.33496],[-10.3807364,11.3355226],[-10.3805916,11.3357884],[-10.380605,11.3361381],[-10.3806774,11.336459],[-10.3812849,11.3373584],[-10.3815598,11.3375819],[-10.3818522,11.3377424],[-10.3827776,11.3379317],[-10.385193,11.3382415],[-10.3865917,11.3385734],[-10.3879274,11.3389942],[-10.389408,11.3396042],[-10.3908081,11.3404353],[-10.3913392,11.3409508],[-10.3917254,11.3415714],[-10.3929378,11.3437278],[-10.3950031,11.3477461],[-10.3958594,11.3504182],[-10.3961752,11.3513279],[-10.396422,11.3516645],[-10.3970415,11.3520906],[-10.3976799,11.3523877],[-10.3979401,11.3526165],[-10.3981302,11.352987],[-10.3984095,11.3542521],[-10.3983961,11.3548544],[-10.3982861,11.3551831],[-10.3981305,11.3554908],[-10.3976316,11.3558537],[-10.3969264,11.3562338],[-10.395797,11.3564926],[-10.3948931,11.3564454],[-10.3934849,11.3563034],[-10.3897567,11.355567],[-10.3890647,11.3554145],[-10.3888152,11.3552751],[-10.3886623,11.35507],[-10.3883753,11.3548937],[-10.3878174,11.3547361],[-10.3871978,11.3546151],[-10.3867982,11.3546046],[-10.3863556,11.3547334],[-10.3860981,11.354907],[-10.3858996,11.354978],[-10.3857199,11.3549833],[-10.3853873,11.3548912],[-10.3843574,11.3544941],[-10.3839738,11.3542496],[-10.3837753,11.3540655],[-10.383601,11.3538341],[-10.383424,11.3537289],[-10.3831665,11.3535947],[-10.3828071,11.3535764],[-10.3818871,11.3536316],[-10.3802938,11.3538893],[-10.3783492,11.3540734],[-10.3773354,11.3540024],[-10.3769169,11.3540313],[-10.3767131,11.3540997],[-10.376351,11.3543732],[-10.3758226,11.3547018],[-10.3755088,11.3548097],[-10.3747658,11.354907],[-10.3744573,11.3548833],[-10.3739048,11.3547255],[-10.3734569,11.354381],[-10.3728802,11.3538025],[-10.3723518,11.3531082],[-10.372038,11.3528716],[-10.3716008,11.3526928],[-10.3703241,11.3523639],[-10.3687872,11.3521589],[-10.3680415,11.3521983],[-10.3671671,11.3524719],[-10.3664773,11.3528455],[-10.3650374,11.3536947],[-10.3644903,11.3537841],[-10.3640182,11.3536263],[-10.3635354,11.3532476],[-10.3634013,11.3526481],[-10.3632886,11.3513804],[-10.3626664,11.3496816],[-10.3621728,11.3483721],[-10.3608585,11.3454792],[-10.3599359,11.3433123],[-10.3598286,11.3430994],[-10.359791,11.3429547],[-10.3597964,11.3426996],[-10.3598634,11.3423893],[-10.3598769,11.3420159],[-10.3598232,11.3415451],[-10.359614,11.3409691],[-10.3592224,11.3406168],[-10.3587958,11.3404248],[-10.3584124,11.3404222],[-10.3579349,11.3406352],[-10.3567447,11.3416178],[-10.3560413,11.3425103],[-10.3538498,11.3437489],[-10.3509612,11.3447271],[-10.349207,11.3454951],[-10.3487027,11.3458001],[-10.3481261,11.3462997],[-10.3461466,11.3494792],[-10.3454922,11.3504496],[-10.3452105,11.3511332],[-10.3448243,11.3528006],[-10.3432793,11.3572394],[-10.3431345,11.3587122],[-10.3432471,11.3594431],[-10.3434617,11.3599218],[-10.3444515,11.3610235],[-10.3454063,11.3630195],[-10.3461492,11.3652546],[-10.3465516,11.3662014],[-10.3470826,11.3668481],[-10.3479625,11.3677317],[-10.3497327,11.3705296],[-10.3502101,11.3715761],[-10.3503281,11.3718233],[-10.350548,11.3720284],[-10.3508109,11.3722177],[-10.351181,11.3723913],[-10.351637,11.3725701],[-10.3519964,11.3728015],[-10.3524309,11.3731854],[-10.352828,11.3739059],[-10.3529888,11.3757203],[-10.3529836,11.3776451],[-10.3529245,11.3781158],[-10.3528387,11.3786365],[-10.3527179,11.3789914],[-10.3524926,11.3794542],[-10.3508324,11.3827673],[-10.3504837,11.3836455],[-10.3502585,11.3849551],[-10.3498722,11.3868639],[-10.3496361,11.3876738],[-10.3494385,11.3882741],[-10.3486196,11.3894409],[-10.3481823,11.3899088],[-10.3480402,11.3900692],[-10.3479008,11.3903295],[-10.3474636,11.3915917],[-10.3472489,11.3933191],[-10.3471954,11.394171],[-10.3475761,11.3958248],[-10.3478874,11.3970396],[-10.3479946,11.3974918],[-10.3479784,11.3978966],[-10.3477183,11.3983069],[-10.3471122,11.3987803],[-10.3465301,11.398959],[-10.3446473,11.3992061],[-10.3429146,11.3992325],[-10.3418791,11.3990536],[-10.3404899,11.3984595],[-10.3398247,11.3978443],[-10.3390038,11.3972342],[-10.3382796,11.3968503],[-10.3365792,11.3957645],[-10.3360641,11.3951202],[-10.3355921,11.3939948],[-10.3350771,11.3932691],[-10.3335698,11.3917179],[-10.3332049,11.3909185],[-10.331998,11.3874424],[-10.3316599,11.3867903],[-10.3312845,11.3864222],[-10.3305817,11.3860541],[-10.3297235,11.3858964],[-10.3275294,11.3858858],[-10.326789,11.3860488],[-10.32614,11.3863014],[-10.3252978,11.3869903],[-10.3247774,11.3876738],[-10.3242481,11.388549],[-10.3236885,11.3913708],[-10.3237475,11.3954147],[-10.3241874,11.3997688],[-10.3249867,11.4053956],[-10.3249706,11.4069309],[-10.3247881,11.4079432],[-10.32441,11.4089135],[-10.3237824,11.4100335],[-10.3233075,11.4112376],[-10.3231996,11.4118454],[-10.3228865,11.4131779],[-10.3228757,11.4137011],[-10.3229696,11.4145819],[-10.3231306,11.4159228],[-10.3230929,11.4164118],[-10.3229643,11.4169692],[-10.321253,11.4188674],[-10.3209418,11.4194931],[-10.3208132,11.4206815],[-10.3207487,11.4211784],[-10.3206253,11.4216123],[-10.3200513,11.4226954],[-10.3196704,11.4232265],[-10.319252,11.4235367],[-10.3188014,11.4235998],[-10.3184688,11.4234788],[-10.317868,11.4231357],[-10.3151053,11.4216175],[-10.3139573,11.4213467],[-10.313386,11.4210444],[-10.312871,11.4205185],[-10.3126264,11.4200212],[-10.3126002,11.4193932],[-10.3126645,11.418715],[-10.3131259,11.417311],[-10.3133082,11.4157441],[-10.31348,11.413525],[-10.313673,11.4117162],[-10.3139734,11.4100651],[-10.3145404,11.4080777],[-10.3146708,11.4070046],[-10.3147782,11.4056479],[-10.3148317,11.4042965],[-10.3148049,11.403371],[-10.3145742,11.4025822],[-10.3141022,11.4017146],[-10.3140003,11.4013359],[-10.3139627,11.4009416],[-10.3142777,11.3961828],[-10.3145154,11.3944046],[-10.3145904,11.3931415],[-10.3144278,11.3918048],[-10.3141776,11.3907134],[-10.3141151,11.3897323],[-10.3141881,11.3887834],[-10.3143328,11.3878316],[-10.3144348,11.3873793],[-10.3146386,11.3869272],[-10.3152019,11.3857018],[-10.3152609,11.3848131],[-10.3152072,11.3840873],[-10.3150785,11.3833985],[-10.3150597,11.3830907],[-10.3151053,11.3827831],[-10.3153253,11.3822573],[-10.3155775,11.3811291],[-10.3157437,11.3805612],[-10.316079,11.3799223],[-10.3169078,11.3786812],[-10.3173208,11.3781973],[-10.3178492,11.3778345],[-10.3184983,11.3775584],[-10.3189167,11.377327],[-10.3195846,11.3763935],[-10.320054,11.3756808],[-10.3204536,11.3752549],[-10.3212504,11.3748683],[-10.3227228,11.3745423],[-10.3253728,11.3738271],[-10.3264833,11.3733012],[-10.3272076,11.3728173],[-10.3292137,11.3712081],[-10.3299327,11.3702561],[-10.3306997,11.368426],[-10.3309781,11.3672037],[-10.3307905,11.3664065],[-10.3303777,11.3657565],[-10.3298398,11.3653762],[-10.3287014,11.3652168],[-10.3260619,11.3649837],[-10.3239834,11.3646026],[-10.3216125,11.3638925],[-10.3211296,11.3638241],[-10.3206201,11.3638555],[-10.3196318,11.3642357],[-10.3182683,11.3646649],[-10.3168672,11.3648366],[-10.3152535,11.3648488],[-10.3145529,11.3650084],[-10.312965,11.3658121],[-10.3104115,11.3666221],[-10.3087753,11.3670007],[-10.3071096,11.3672159],[-10.30482,11.3677001],[-10.3039197,11.3678904],[-10.3016054,11.3684792],[-10.3007922,11.3688961],[-10.3001668,11.3693866],[-10.2995002,11.3702352],[-10.2981152,11.3721338],[-10.2978238,11.3726675],[-10.2977809,11.3729382],[-10.2978274,11.3732131],[-10.2979928,11.3736404],[-10.2983153,11.3744641],[-10.2986782,11.3777752],[-10.2990659,11.38013],[-10.2995539,11.3819694],[-10.2996413,11.3831959],[-10.2994162,11.3843977],[-10.2989409,11.3856485],[-10.2980026,11.3875249],[-10.2975522,11.3887513],[-10.2972396,11.3905661],[-10.2969392,11.3935707],[-10.2964264,11.39606],[-10.2955633,11.3994324],[-10.2952004,11.4004135],[-10.2935491,11.4028538],[-10.2921188,11.4045121],[-10.2910097,11.4059562],[-10.2891207,11.4084456],[-10.2887704,11.4088134],[-10.2879573,11.4090219],[-10.2868064,11.4089361],[-10.2848049,11.4085681],[-10.2830785,11.4085069],[-10.2822779,11.4082862],[-10.2815398,11.4078202],[-10.281077,11.4071947],[-10.2802888,11.4058214],[-10.2792353,11.4044322],[-10.2789841,11.4040852],[-10.2772239,11.4020648],[-10.2762331,11.4006922],[-10.2750885,11.3983255],[-10.2746954,11.3974059],[-10.2743994,11.3969506],[-10.2742643,11.3967425],[-10.2738484,11.3961854],[-10.2728798,11.395147],[-10.2719687,11.394358],[-10.2707922,11.3937336],[-10.2691753,11.3926802],[-10.268231,11.3917863],[-10.2670348,11.38983],[-10.2657767,11.38834],[-10.2644942,11.3868744],[-10.2640897,11.3864802],[-10.2636982,11.3863381],[-10.2631402,11.3862276],[-10.2615927,11.3863368],[-10.2604783,11.3866663],[-10.2593282,11.3874381],[-10.2587666,11.3883022],[-10.2586039,11.3889461],[-10.2586212,11.389377],[-10.2586636,11.3897367],[-10.2586301,11.3899574],[-10.2585476,11.3901602],[-10.2581973,11.3905035],[-10.2578408,11.3907672],[-10.2571455,11.3911868],[-10.2566975,11.3916889],[-10.2559393,11.3926496],[-10.2553577,11.3934895],[-10.2547583,11.3940081],[-10.254297,11.3942946],[-10.253731,11.394505],[-10.2525455,11.3947101],[-10.2507726,11.3948336],[-10.2489406,11.3949914],[-10.2478516,11.3952544],[-10.2465186,11.3955752],[-10.2460519,11.3956513],[-10.2456013,11.3956986],[-10.2452472,11.3957355],[-10.2449629,11.3958643],[-10.244582,11.3960984],[-10.2440831,11.3964165],[-10.2433322,11.3969081],[-10.2430129,11.397204],[-10.2426159,11.3979389],[-10.2422404,11.3984122],[-10.2416158,11.3989098],[-10.2412668,11.3993745],[-10.2412131,11.3997584],[-10.2414156,11.4002404],[-10.2419883,11.4006787],[-10.2430934,11.4009468],[-10.2445258,11.4014095],[-10.2457377,11.4020308],[-10.2463695,11.4025335],[-10.2474327,11.403674],[-10.2484336,11.4046182],[-10.2491466,11.4051025],[-10.2499785,11.4054336],[-10.2511043,11.405826],[-10.2519863,11.4063228],[-10.2528557,11.4071933],[-10.253425,11.4081191],[-10.2537877,11.4088611],[-10.2540879,11.4099034],[-10.2542444,11.4105839],[-10.254188,11.4111542],[-10.2540191,11.4116323],[-10.2521164,11.4136512],[-10.2515772,11.4143348],[-10.2513948,11.4148607],[-10.2512714,11.415234],[-10.2509335,11.4156862],[-10.250625,11.4160306],[-10.2503648,11.4161567],[-10.250169,11.4162172],[-10.2500162,11.4162225],[-10.2498364,11.4162015],[-10.2496621,11.4160831],[-10.2493697,11.4157493],[-10.2490667,11.4155837],[-10.2486938,11.4155468],[-10.248152,11.4155521],[-10.2478597,11.4155258],[-10.2476263,11.4154548],[-10.2472508,11.4152419],[-10.247106,11.4150525],[-10.2469451,11.4148027],[-10.2466419,11.4146292],[-10.2461323,11.4143296],[-10.2455798,11.413922],[-10.2448946,11.4133679],[-10.2441381,11.4129814],[-10.2426828,11.4125564],[-10.2407272,11.4120858],[-10.2395031,11.4117076],[-10.238716,11.4114848],[-10.2375627,11.4113691],[-10.2365756,11.4114533],[-10.2356477,11.4116845],[-10.2340919,11.4123314],[-10.231576,11.4132989],[-10.2307888,11.413646],[-10.2292013,11.4143457],[-10.2274663,11.4149618],[-10.2264487,11.4149855],[-10.2258549,11.4148005],[-10.2253621,11.4144224],[-10.2251549,11.4140902],[-10.225085,11.4138852],[-10.2249725,11.4134487],[-10.2248704,11.4132068],[-10.2245781,11.4128572],[-10.223878,11.4123577],[-10.2231647,11.4118633],[-10.2226549,11.411653],[-10.222266,11.4114611],[-10.2203697,11.4104989],[-10.2180878,11.409315],[-10.2174872,11.4088124],[-10.2172245,11.4082728],[-10.2171182,11.4077823],[-10.2172308,11.406838],[-10.2175998,11.4054463],[-10.2180064,11.404128],[-10.2183566,11.4029324],[-10.218807,11.4019637],[-10.2192511,11.4009765],[-10.2196139,11.3994926],[-10.2198015,11.3981744],[-10.2196701,11.3968255],[-10.2195075,11.3959671],[-10.2190341,11.3949835],[-10.2183366,11.3937898],[-10.2178967,11.392959],[-10.2175374,11.3925802],[-10.2169472,11.3924541],[-10.2163732,11.3924331],[-10.2160353,11.3925855],[-10.2157046,11.3928829],[-10.2151716,11.3933455],[-10.2143724,11.393724],[-10.2139163,11.3938581],[-10.2126771,11.3941054],[-10.2117303,11.3941842],[-10.2101504,11.3941827],[-10.2089118,11.3940295],[-10.2077109,11.3939927],[-10.206191,11.3942747],[-10.2026632,11.395078],[-10.2007305,11.3957585],[-10.2000549,11.3960284],[-10.1995983,11.3964208],[-10.1992543,11.3969972],[-10.1986852,11.398389],[-10.1980806,11.3997689],[-10.1975441,11.4009784],[-10.1970151,11.4024971],[-10.1965461,11.4036681],[-10.1960956,11.4045695],[-10.1955327,11.4057529],[-10.1949447,11.4065377],[-10.1944193,11.4068381],[-10.1939815,11.4068749],[-10.1932934,11.4067094],[-10.1926805,11.4067216],[-10.1916923,11.406231],[-10.1911105,11.4060778],[-10.1905976,11.4059613],[-10.1901973,11.4057529],[-10.1896594,11.4052501],[-10.189503,11.4049251],[-10.1895718,11.4046308],[-10.1897344,11.4043427],[-10.1897219,11.4039625],[-10.1894029,11.4028282],[-10.1890778,11.402123],[-10.1886398,11.401559],[-10.1881144,11.4012218],[-10.1879017,11.4008907],[-10.1876828,11.4001059],[-10.1875391,11.3987139],[-10.1875577,11.3978495],[-10.1874326,11.3971198],[-10.1870825,11.3960283],[-10.1867509,11.3946243],[-10.1866758,11.3937413],[-10.1866509,11.3926805],[-10.1873263,11.3889157],[-10.1874577,11.3880144],[-10.1874702,11.3872418],[-10.1872889,11.3864814],[-10.1869635,11.3859419],[-10.1858502,11.3849363],[-10.1852872,11.38455],[-10.1849057,11.3841514],[-10.1845554,11.3836731],[-10.1842614,11.3831519],[-10.1837611,11.3818886],[-10.1832295,11.3798958],[-10.1824725,11.3766582],[-10.1820347,11.3753705],[-10.1814781,11.3742912],[-10.1810026,11.3736229],[-10.1805273,11.3732672],[-10.1799707,11.3731384],[-10.1795765,11.3731875],[-10.1793076,11.3733899],[-10.1789511,11.3739234],[-10.1779566,11.3748737],[-10.1770121,11.3755729],[-10.17603,11.3760696],[-10.1734782,11.3771671],[-10.1717956,11.3779826],[-10.1699378,11.3791662],[-10.1683116,11.3800369],[-10.1672107,11.3805152],[-10.166823,11.380883],[-10.1663663,11.3810609],[-10.1657658,11.3811284],[-10.1648902,11.3813001],[-10.1643522,11.3815638],[-10.1637705,11.3816925],[-10.1628574,11.3817844],[-10.1622443,11.3817171],[-10.1617877,11.381527],[-10.161181,11.3810548],[-10.1607308,11.3809014],[-10.1602428,11.380969],[-10.159855,11.38111],[-10.1596866,11.3811934],[-10.1588167,11.3816251],[-10.1579973,11.3822873],[-10.1568214,11.3828698],[-10.156296,11.3830722],[-10.1557956,11.3830845],[-10.1551951,11.3829189],[-10.1546384,11.3826184],[-10.1543257,11.3823118],[-10.1540255,11.3819255],[-10.153475,11.3815883],[-10.1524681,11.381116],[-10.1510857,11.3806746],[-10.1499349,11.3803495],[-10.1491029,11.3800492],[-10.1486963,11.3798959],[-10.1481897,11.379577],[-10.1474579,11.3790313],[-10.1470513,11.3785285],[-10.1467011,11.3779029],[-10.146282,11.3767318],[-10.1460756,11.3756955],[-10.1460757,11.3748983],[-10.1462444,11.3725559],[-10.1462757,11.3718078],[-10.1464383,11.3710045],[-10.14682,11.3700785],[-10.1472202,11.3692446],[-10.1477143,11.3685517],[-10.148196,11.367963],[-10.1487465,11.3675091],[-10.1497847,11.3669941],[-10.1509293,11.3665342],[-10.1522117,11.3658289],[-10.1535251,11.3648785],[-10.1552015,11.3636152],[-10.1576783,11.3619166],[-10.1587979,11.3612176],[-10.1596112,11.3607146],[-10.1601052,11.3601996],[-10.1605118,11.359568],[-10.1609308,11.3586543],[-10.1613812,11.3579613],[-10.1621006,11.357213],[-10.1629324,11.3563485],[-10.1640583,11.3550055],[-10.1645899,11.3541653],[-10.1649402,11.353503],[-10.1650715,11.3529082],[-10.1650152,11.3526016],[-10.1648526,11.3522704],[-10.1643398,11.3518656],[-10.1637205,11.3514241],[-10.1629888,11.3511419],[-10.1624195,11.3511236],[-10.16145,11.3510439],[-10.1607995,11.3509765],[-10.1598801,11.3506759],[-10.1582225,11.3500075],[-10.1541944,11.3479225],[-10.1528372,11.3474747],[-10.1495964,11.3469417],[-10.1486013,11.3468549],[-10.1478428,11.3467258],[-10.1476121,11.3466416],[-10.1473546,11.3463708],[-10.1471321,11.3461656],[-10.1467431,11.3460553],[-10.1464051,11.3460473],[-10.1459679,11.3461762],[-10.1452652,11.3462735],[-10.144431,11.3462525],[-10.1433689,11.3460052],[-10.1412338,11.3452795],[-10.139689,11.3444852],[-10.1383585,11.3441328],[-10.1368564,11.3438383],[-10.1353652,11.3434544],[-10.1343951,11.343273],[-10.1329135,11.3431862],[-10.1319404,11.3431733],[-10.1303548,11.3432072],[-10.128641,11.3430996],[-10.1277785,11.3431039],[-10.1266994,11.3432816],[-10.1254344,11.3435462],[-10.1248683,11.3437761],[-10.1242071,11.3441855],[-10.1237892,11.3445782],[-10.1234706,11.345064],[-10.1233864,11.3455372],[-10.1234213,11.345908],[-10.1235554,11.3461499],[-10.1238775,11.3464343],[-10.1243171,11.3467206],[-10.1245397,11.3468889],[-10.1249744,11.3470466],[-10.1259774,11.3475569],[-10.1264495,11.3479512],[-10.1270342,11.3485036],[-10.1276404,11.3492294],[-10.1279032,11.3495843],[-10.1281205,11.3498289],[-10.1285148,11.3500708],[-10.1293542,11.3507414],[-10.1325563,11.3527361],[-10.1351747,11.3548002],[-10.1360238,11.3558583],[-10.1365368,11.3570898],[-10.1366961,11.3580437],[-10.1365899,11.3594661],[-10.1361831,11.361426],[-10.1356876,11.3630391],[-10.1350861,11.3640971],[-10.1336709,11.3657448],[-10.1323793,11.3673232],[-10.129655,11.3701155],[-10.1283361,11.3710363],[-10.1267182,11.3716418],[-10.1253558,11.3719888],[-10.1232861,11.3730987],[-10.1199247,11.3755789],[-10.1185155,11.3768458],[-10.1177323,11.3777976],[-10.1169702,11.3789436],[-10.1158678,11.3803899],[-10.1152486,11.3811616],[-10.1149052,11.3814421],[-10.1145673,11.3815],[-10.1143849,11.3814684],[-10.1140148,11.3808426],[-10.1137626,11.3802641],[-10.1134435,11.3799432],[-10.113017,11.3797381],[-10.1123223,11.3794911],[-10.1116812,11.3791229],[-10.1106459,11.3782394],[-10.1095463,11.3772349],[-10.1087362,11.3763041],[-10.107792,11.3747527],[-10.1064939,11.3725648],[-10.1056141,11.3711976],[-10.1046539,11.3703245],[-10.1035917,11.3694989],[-10.102771,11.3690097],[-10.101682,11.3687941],[-10.1007485,11.3688099],[-10.0994611,11.3690466],[-10.0969381,11.3696539],[-10.0959384,11.3700876],[-10.0949926,11.3706558],[-10.0945902,11.3711318],[-10.0944829,11.3714946],[-10.0944293,11.3718838],[-10.0943649,11.3722704],[-10.0942308,11.3725701],[-10.0939143,11.3729173],[-10.0933296,11.3733144],[-10.0925812,11.3736246],[-10.0911088,11.373969],[-10.0877452,11.3745423],[-10.0860931,11.3750156],[-10.085449,11.3751257],[-10.0848645,11.3751997],[-10.0835314,11.3751682],[-10.0825042,11.3751208],[-10.0819731,11.3751839],[-10.0811524,11.3752996],[-10.0799239,11.3755048],[-10.0794303,11.3756152],[-10.078851,11.3758412],[-10.0779123,11.3764039],[-10.0771719,11.376751],[-10.0763941,11.3770693],[-10.0760803,11.3772822],[-10.0752783,11.3778634],[-10.0747499,11.378334],[-10.0744335,11.3786837],[-10.0741249,11.3788836],[-10.0736738,11.379011],[-10.0732124,11.3790266],[-10.0724968,11.3790454],[-10.0715822,11.3789046],[-10.0704075,11.3786522],[-10.0693506,11.3782762],[-10.0686962,11.3781131],[-10.068208,11.378171],[-10.0677649,11.3784821],[-10.0675508,11.3788126],[-10.0674382,11.3792123],[-10.0674462,11.3801432],[-10.0675428,11.3822205],[-10.0673605,11.3842503],[-10.066867,11.3863223],[-10.0666255,11.3869166],[-10.0661641,11.387553],[-10.0653863,11.3883944],[-10.0649518,11.3887572],[-10.0643992,11.3890254],[-10.0637448,11.3892147],[-10.0631332,11.3892304],[-10.0626773,11.3890885],[-10.0619961,11.3887834],[-10.0613193,11.388373],[-10.0609659,11.3880738],[-10.0606446,11.3874518],[-10.0606046,11.3870265],[-10.060733,11.3863573],[-10.0612953,11.3846406],[-10.0616808,11.3830108],[-10.0617493,11.3820626],[-10.0616849,11.3816156],[-10.0615025,11.3800591],[-10.0609821,11.3770341],[-10.0604886,11.3745266],[-10.0603437,11.3735957],[-10.0604082,11.3725175],[-10.0608213,11.3701047],[-10.061084,11.3690098],[-10.0614238,11.3672856],[-10.0615615,11.3662329],[-10.0616688,11.3652757],[-10.061862,11.3639924],[-10.0618994,11.3626461],[-10.0620021,11.3618915],[-10.0623154,11.3613717],[-10.0628374,11.3609544],[-10.064741,11.3598756],[-10.0659458,11.3590645],[-10.0676808,11.3574501],[-10.0682938,11.3570134],[-10.0686372,11.3564873],[-10.0690877,11.3556302],[-10.0695437,11.355141],[-10.0712311,11.3539851],[-10.0723314,11.3531426],[-10.0734479,11.3520873],[-10.0745564,11.3508036],[-10.075231,11.349646],[-10.0756247,11.3487403],[-10.0759006,11.3474464],[-10.0758736,11.3467953],[-10.0755844,11.345866],[-10.074725,11.3437633],[-10.073986,11.3425663],[-10.0734398,11.3419441],[-10.0729982,11.3416999],[-10.0725001,11.3416134],[-10.0718816,11.3418732],[-10.0714318,11.3423458],[-10.0700664,11.3438026],[-10.0691989,11.3444406],[-10.0682993,11.3448501],[-10.0674559,11.3450548],[-10.0662511,11.3452202],[-10.0655765,11.3452595],[-10.0648213,11.3452281],[-10.0638897,11.345543],[-10.0634719,11.3457479],[-10.0629562,11.3461894],[-10.062492,11.3465511],[-10.061599,11.3471782],[-10.0606688,11.3480237],[-10.0588776,11.3504336],[-10.0572712,11.3527015],[-10.0553435,11.3549143],[-10.0533996,11.3568831],[-10.0519485,11.3587646],[-10.0509077,11.3603688],[-10.0490786,11.3637662],[-10.0482738,11.3652284],[-10.0478447,11.3661856],[-10.0470462,11.3678763],[-10.0462675,11.3691518],[-10.0457419,11.3702035],[-10.0455809,11.3707926],[-10.0454682,11.3717656],[-10.0453985,11.3727911],[-10.0453824,11.3738324],[-10.0453771,11.3753101],[-10.0455728,11.3764514],[-10.0457376,11.3772785],[-10.0458089,11.3778082],[-10.0458062,11.3786549],[-10.0457069,11.3795358],[-10.0455017,11.3802063],[-10.0454722,11.3804442],[-10.0454749,11.3806625],[-10.045609,11.3810188],[-10.0457472,11.3811489],[-10.0459041,11.3812555],[-10.0462595,11.381396],[-10.0465062,11.3815078],[-10.0466834,11.3816682],[-10.0467718,11.3818128],[-10.0468335,11.3819943],[-10.0468066,11.3822941],[-10.0466752,11.3825464],[-10.0465304,11.382749],[-10.0464204,11.3829198],[-10.0463828,11.3831249],[-10.0464164,11.3832801],[-10.0467249,11.3839399],[-10.0470158,11.3848368],[-10.047142,11.385686],[-10.0471151,11.3866116],[-10.0468576,11.3875792],[-10.0464518,11.3882077],[-10.0460663,11.3889544],[-10.0454317,11.3896565],[-10.0446607,11.3902077],[-10.0438977,11.3905225],[-10.0415844,11.3911525],[-10.0405081,11.3915068],[-10.038741,11.3924438],[-10.0376808,11.392987],[-10.0367886,11.3935479],[-10.0350463,11.3949713],[-10.0340341,11.3957036],[-10.0334317,11.3959477],[-10.0327811,11.3960343],[-10.0307214,11.3956304],[-10.0301261,11.3954831],[-10.0296621,11.3953819],[-10.0291712,11.3953227],[-10.0287009,11.3952834],[-10.0271756,11.3950361],[-10.0258012,11.3948296],[-10.0251908,11.3949004],[-10.0244518,11.3951997],[-10.0242063,11.3953937],[-10.0240454,11.3956092],[-10.0239703,11.3960484],[-10.0240749,11.3965638],[-10.0242573,11.3968031],[-10.0244866,11.3969607],[-10.0248153,11.3970146],[-10.0253996,11.3971918],[-10.0261483,11.3976076],[-10.0267626,11.3979389],[-10.0269691,11.3980992],[-10.0272909,11.3984148],[-10.027425,11.3986172],[-10.027492,11.3988644],[-10.0274599,11.3994297],[-10.0274786,11.3997793],[-10.0275807,11.4001606],[-10.0278837,11.4007679],[-10.0281251,11.4016094],[-10.0282243,11.4021747],[-10.0281841,11.4026822],[-10.0279453,11.4032369],[-10.0270549,11.4048144],[-10.0263065,11.4067864],[-10.0257048,11.4080416],[-10.0252631,11.4086163],[-10.0245723,11.4091911],[-10.0235763,11.4095769],[-10.0216727,11.4100493],[-10.0207008,11.410191],[-10.0201787,11.4101044],[-10.0193674,11.4095927],[-10.0191397,11.4091922],[-10.0190672,11.4087188],[-10.0189761,11.4082771],[-10.0185952,11.4074148],[-10.0179218,11.4064668],[-10.0163448,11.4047593],[-10.0159908,11.4042675],[-10.0156215,11.4042493],[-10.0152199,11.4043832],[-10.0148944,11.4046206],[-10.0143926,11.4049501],[-10.0139601,11.4049279],[-10.0130941,11.404693],[-10.0124374,11.4042786],[-10.0116221,11.4027642],[-10.0111929,11.4017545],[-10.0102187,11.4011172],[-10.0093604,11.4010741],[-10.0085322,11.4010394],[-10.0069014,11.4007659],[-10.0051762,11.4007796],[-10.0046612,11.4007796],[-10.0040904,11.4004925],[-10.0034038,11.4001139],[-10.0023652,11.3997068],[-10.0015284,11.399833],[-10.0010348,11.4000224],[-10.0005628,11.4002327],[-10.0005628,11.4006955],[-10.0018931,11.4018523],[-10.0028802,11.4024834],[-10.0037385,11.4029882],[-10.0043822,11.4035561],[-10.0056697,11.4048392],[-10.0063349,11.4054912],[-10.0063778,11.4061643],[-10.0063993,11.4073632],[-10.0065709,11.4090459],[-10.0071932,11.4112755],[-10.0075365,11.4126006],[-10.0079442,11.4135261],[-10.0080944,11.414746],[-10.0079871,11.4151877],[-10.0072361,11.41666],[-10.0067211,11.4170807],[-10.0059057,11.4180482],[-10.0049831,11.4189316],[-10.0045196,11.4193596],[-10.0041462,11.4197939],[-10.0041247,11.4202987],[-10.0042008,11.4205767],[-10.0043608,11.4211611],[-10.0048114,11.42175],[-10.0050689,11.4219183],[-10.0061632,11.421771],[-10.007043,11.4213924],[-10.0076438,11.4211611],[-10.0082661,11.42114],[-10.0091244,11.4212031],[-10.0096823,11.4212452],[-10.0104333,11.4214976],[-10.0113774,11.4223599],[-10.0126649,11.4238322],[-10.0142828,11.4261952],[-10.0152613,11.4270081],[-10.0157763,11.4270502],[-10.0171496,11.4270712],[-10.0179435,11.4270712],[-10.0185658,11.4270712],[-10.0193597,11.4274708],[-10.019703,11.4286486],[-10.0198532,11.4297844],[-10.0198103,11.4302261],[-10.018716,11.4311515],[-10.0156261,11.4337594],[-10.0139738,11.4352527],[-10.0124289,11.4367249],[-10.011871,11.4371666],[-10.0113989,11.437461],[-10.0104762,11.4378185],[-10.0093175,11.438134],[-10.0089184,11.4383938],[-10.00803,11.4391856],[-10.0076438,11.4404054],[-10.0073863,11.4416252],[-10.0074721,11.4422562],[-10.0079228,11.4427609],[-10.0085021,11.4432236],[-10.0092796,11.443164],[-10.0098754,11.4431184],[-10.0105406,11.4429922],[-10.011356,11.4428871],[-10.0127507,11.4427609],[-10.0152184,11.4418776],[-10.0160767,11.4412887],[-10.0165702,11.4405316],[-10.0173427,11.4397955],[-10.0178577,11.4393749],[-10.0184585,11.4391225],[-10.0191237,11.4392487],[-10.0198318,11.4395852],[-10.020733,11.4399848],[-10.0215269,11.4404895],[-10.0226213,11.4418986],[-10.0236512,11.4440228],[-10.0247456,11.4464413],[-10.0252606,11.4472826],[-10.0258614,11.4476191],[-10.0280715,11.4479766],[-10.0294877,11.4479766],[-10.0301744,11.4479345],[-10.030861,11.4480186],[-10.0315262,11.4481448],[-10.0322772,11.4483762],[-10.0328566,11.448923],[-10.0329424,11.4497432],[-10.0330497,11.4500797],[-10.0327149,11.4502763],[-10.0314275,11.4508021],[-10.0303675,11.4511312],[-10.029831,11.4514256],[-10.0292946,11.451699],[-10.0287882,11.4518746],[-10.0283075,11.4519303],[-10.0280286,11.4521407],[-10.0281573,11.4525402],[-10.0285221,11.4529819],[-10.0296808,11.453066],[-10.0303117,11.4531154],[-10.0313974,11.4533814],[-10.0324703,11.45376],[-10.0336934,11.4546853],[-10.0339509,11.4550639],[-10.0340153,11.4557789],[-10.0338651,11.4569986],[-10.033629,11.4579029],[-10.0337792,11.4588493],[-10.0340367,11.4593961],[-10.0342728,11.4596274],[-10.0348521,11.4596905],[-10.0357104,11.4597746],[-10.0361181,11.4595853],[-10.0362254,11.4589965],[-10.0362254,11.4576085],[-10.0361396,11.4551901],[-10.0362898,11.4542647],[-10.0365258,11.4535076],[-10.0368262,11.4529819],[-10.0372125,11.4527295],[-10.0375558,11.4525823],[-10.0381781,11.4527085],[-10.0387789,11.4527505],[-10.0393153,11.4527716],[-10.0406672,11.4520145],[-10.0425554,11.4502269],[-10.0434352,11.4495118],[-10.0442506,11.4490071],[-10.0453664,11.4486706],[-10.0459028,11.4485234],[-10.0461389,11.4487127],[-10.047598,11.45029],[-10.0498296,11.4515939],[-10.0505591,11.4519934],[-10.0518466,11.4527716],[-10.0528337,11.4534656],[-10.0537778,11.4548115],[-10.0540997,11.4553793],[-10.0545932,11.455842],[-10.0549365,11.4563467],[-10.0548507,11.4567673],[-10.054443,11.45723],[-10.0536705,11.4571879],[-10.0530268,11.4567673],[-10.0524903,11.4563677],[-10.0519754,11.4560523],[-10.0513831,11.4558914],[-10.0508252,11.4558704],[-10.0499798,11.455842],[-10.0493361,11.4560102],[-10.0489069,11.4564729],[-10.0488425,11.4570617],[-10.0490357,11.457945],[-10.0499583,11.458618],[-10.050645,11.4590386],[-10.0515891,11.459312],[-10.0521256,11.4595222],[-10.0529624,11.4598587],[-10.0538422,11.4605527],[-10.0546361,11.4618566],[-10.0548507,11.4624875],[-10.054443,11.4635389],[-10.0537134,11.4646535],[-10.0528766,11.4655788],[-10.0527478,11.4662307],[-10.0527907,11.4668616],[-10.0530697,11.4670719],[-10.0535847,11.4669667],[-10.0555802,11.4665462],[-10.0579835,11.4658732],[-10.0598289,11.4655788],[-10.0616098,11.4653895],[-10.0621248,11.4653895],[-10.0626184,11.4656419],[-10.0627277,11.4660469],[-10.0637985,11.4655788],[-10.0643993,11.4652213],[-10.0653435,11.4647166],[-10.0659958,11.4645557],[-10.0664378,11.4646325],[-10.0665666,11.4650741],[-10.066352,11.465747],[-10.0657941,11.4668616],[-10.0655795,11.4674925],[-10.0656224,11.4680392],[-10.0662232,11.4680813],[-10.0672618,11.4677312],[-10.0681416,11.4675419],[-10.0695706,11.4670719],[-10.0719095,11.4665041],[-10.0729824,11.4662728],[-10.0740982,11.4663148],[-10.0759007,11.4667985],[-10.0763727,11.4673873],[-10.0767375,11.4685019],[-10.0771452,11.4699108],[-10.0773598,11.4708571],[-10.0776044,11.4718318],[-10.0778318,11.4723376],[-10.0786258,11.4733596],[-10.0798489,11.4746844],[-10.080793,11.4754415],[-10.0821234,11.4755676],[-10.0830031,11.4753573],[-10.0835181,11.4749368],[-10.0838829,11.4744741],[-10.0841833,11.4738433],[-10.0847841,11.472918],[-10.0852777,11.4723502],[-10.0860287,11.4718035],[-10.0867368,11.471467],[-10.0880028,11.4711095],[-10.0896765,11.4707099],[-10.0908781,11.4701842],[-10.0923673,11.4692663],[-10.0930453,11.4687542],[-10.0932599,11.4684598],[-10.0934101,11.4668616],[-10.0935389,11.4659153],[-10.0938607,11.465726],[-10.0944615,11.465747],[-10.0954486,11.4656839],[-10.0963284,11.4656419],[-10.096779,11.4655998],[-10.0973154,11.4654106],[-10.0980235,11.4649479],[-10.0986672,11.464296],[-10.0990943,11.464072],[-10.0994483,11.4639984],[-10.0997916,11.4640615],[-10.1001028,11.4642823],[-10.1002766,11.4646635],[-10.1004997,11.465439],[-10.1005319,11.4661645],[-10.1003088,11.4668926],[-10.1000298,11.4675445],[-10.0994054,11.4688983],[-10.0987424,11.4700785],[-10.098354,11.4706963],[-10.0976373,11.471509],[-10.0970365,11.472224],[-10.0965,11.472897],[-10.0965,11.4737802],[-10.0971652,11.4745162],[-10.098281,11.4752522],[-10.0989033,11.4752522],[-10.0992466,11.4749788],[-10.0996972,11.4745162],[-10.1001478,11.4738222],[-10.1007057,11.4733596],[-10.1011993,11.4733596],[-10.1019288,11.473675],[-10.1032323,11.4743837],[-10.1043856,11.4752354],[-10.1054263,11.4764919],[-10.1069659,11.4792098],[-10.1080443,11.4808037],[-10.1085592,11.4816659],[-10.1089884,11.48175],[-10.10975,11.4818068],[-10.1119655,11.4812653],[-10.1133657,11.4809814],[-10.1140362,11.480645],[-10.1142025,11.4802507],[-10.1141059,11.4797881],[-10.1134354,11.4787787],[-10.1133335,11.47809],[-10.1135749,11.4770439],[-10.1158762,11.4743312],[-10.1162463,11.4742628],[-10.116697,11.4744678],[-10.1183662,11.4767177],[-10.1194249,11.4772433],[-10.1238239,11.4794264],[-10.1267967,11.4815889],[-10.1273331,11.4815739],[-10.1274097,11.4810633],[-10.1270572,11.4792612],[-10.1272258,11.4785554],[-10.1320835,11.4759574],[-10.1369872,11.4745007],[-10.1377534,11.4747109],[-10.1390253,11.4759574],[-10.1401592,11.4775042],[-10.1404351,11.4783602],[-10.1404504,11.479922],[-10.1398681,11.4813637],[-10.1403738,11.4822046],[-10.1408948,11.48255],[-10.1416303,11.48249],[-10.1420594,11.481619],[-10.1419828,11.4787807],[-10.141661,11.4770387],[-10.1420441,11.4763779],[-10.143791,11.4759123],[-10.1462888,11.4761076],[-10.1476373,11.4767083],[-10.1498593,11.4786906],[-10.1531999,11.4828204],[-10.1538282,11.4839917],[-10.1543492,11.484232],[-10.1561268,11.4840518],[-10.1569083,11.4838565],[-10.1574294,11.4843071],[-10.1574447,11.4854934],[-10.1570922,11.4873856],[-10.1572914,11.4894279],[-10.1582568,11.4914401],[-10.1593295,11.493122],[-10.1610152,11.4944435],[-10.161858,11.4950291],[-10.1617507,11.4956298],[-10.1610458,11.4962605],[-10.1587625,11.4969062],[-10.1577358,11.4982577],[-10.1574753,11.4999245],[-10.1578891,11.5002849],[-10.1587166,11.5004951],[-10.1606934,11.5001948],[-10.1616281,11.4997143],[-10.1621491,11.4997893],[-10.1628694,11.5008484],[-10.1634363,11.5016814],[-10.1640646,11.5017415],[-10.1648921,11.501351],[-10.1674512,11.5009906],[-10.1700103,11.5011558],[-10.1713895,11.5010357],[-10.1717573,11.5015462],[-10.1719871,11.5032731],[-10.1706846,11.5070722],[-10.16952,11.5086639],[-10.1694893,11.5092044],[-10.1702555,11.5105108],[-10.1705926,11.5144749],[-10.170562,11.5156011],[-10.1709362,11.5155974],[-10.1726039,11.5144494],[-10.1730895,11.5134358],[-10.1736911,11.5133634],[-10.1744511,11.5137978],[-10.1755699,11.5157319],[-10.1774171,11.517666],[-10.1784726,11.5182658],[-10.1790531,11.5181728],[-10.1796548,11.517728],[-10.1796442,11.517304],[-10.1785676,11.515825],[-10.1780504,11.5152561],[-10.1783987,11.5139012],[-10.1788104,11.5133324],[-10.179412,11.5131462],[-10.1811009,11.5137874],[-10.182473,11.5151941],[-10.1836024,11.5158974],[-10.184468,11.5167144],[-10.1849113,11.5166731],[-10.1856607,11.5154009],[-10.1866951,11.5144184],[-10.1879195,11.5139529],[-10.1904317,11.513653],[-10.191065,11.5138288],[-10.1912339,11.5142839],[-10.1904105,11.5160215],[-10.1899461,11.5177177],[-10.1896189,11.5178935],[-10.189165,11.5178211],[-10.1890384,11.5181004],[-10.1891967,11.5184106],[-10.190115,11.5187726],[-10.1912761,11.5187519],[-10.1920554,11.5184207],[-10.1931498,11.5181684],[-10.1942656,11.5185048],[-10.1944587,11.519472],[-10.1944372,11.5208597],[-10.1943299,11.521953],[-10.1945798,11.5227615],[-10.1952892,11.5232684],[-10.1959543,11.5232394],[-10.1974028,11.5222112],[-10.1982452,11.520314],[-10.1990877,11.5189092],[-10.1996346,11.5172872],[-10.2000336,11.5168382],[-10.2005953,11.5167803],[-10.2044123,11.522714],[-10.2054875,11.5237898],[-10.206729,11.5242966],[-10.2096259,11.5245573],[-10.2110448,11.524456],[-10.2116065,11.5239491],[-10.211636,11.5233263],[-10.2111335,11.5209368],[-10.2106753,11.5196913],[-10.2106457,11.5189816],[-10.2111335,11.5184458],[-10.2118429,11.5181851],[-10.213587,11.5184313],[-10.2142225,11.518721],[-10.2156266,11.5241084],[-10.2160257,11.5244415],[-10.2188339,11.5223271],[-10.2193069,11.5213712],[-10.2199868,11.5210526],[-10.2213909,11.5210237],[-10.2226768,11.5208354],[-10.2243026,11.520343],[-10.2256623,11.519141],[-10.2262388,11.5184458],[-10.226697,11.5185761],[-10.2272734,11.5199085],[-10.2272143,11.5212554],[-10.2270221,11.5233698],[-10.2258545,11.525658],[-10.224273,11.5270917],[-10.2242287,11.5277144],[-10.2246573,11.5280185],[-10.2282636,11.5270917],[-10.2289675,11.527194],[-10.2293544,11.5275033],[-10.2292424,11.5288798],[-10.2282549,11.5293886],[-10.2272063,11.529638],[-10.2265853,11.5302564],[-10.2265853,11.5307053],[-10.2295885,11.5326205],[-10.2311869,11.5332689],[-10.2322255,11.5343463],[-10.2319257,11.5350127],[-10.2294127,11.5372378],[-10.2289631,11.5385367],[-10.2279256,11.5401631],[-10.2274069,11.5404907],[-10.2267844,11.5405359],[-10.2260697,11.5403326],[-10.2240178,11.5390224],[-10.2233146,11.5389885],[-10.2227843,11.5393499],[-10.2222771,11.5404455],[-10.2229342,11.5426141],[-10.2223924,11.5450876],[-10.2228189,11.5456071],[-10.2258365,11.5462221],[-10.2297009,11.5468034],[-10.230732,11.5471487],[-10.2342563,11.5475707],[-10.2374021,11.5471998],[-10.2379764,11.5474812],[-10.2383158,11.5541952],[-10.2369714,11.5570342],[-10.237358,11.5574622],[-10.2391842,11.5573183],[-10.240459,11.5570895],[-10.2430412,11.5572363],[-10.2439634,11.5570443],[-10.2447934,11.5572363],[-10.2457617,11.5588401],[-10.2459462,11.5599243],[-10.2447242,11.5624767],[-10.2464534,11.5649274],[-10.2466955,11.5655485],[-10.2472257,11.5660568],[-10.2477791,11.5659212],[-10.2490651,11.5646524],[-10.2510529,11.5626912],[-10.2516293,11.5620475],[-10.2524939,11.5617539],[-10.2542576,11.5617539],[-10.2559868,11.5615619],[-10.2571511,11.5611214],[-10.2582808,11.5600372],[-10.2592491,11.5588852],[-10.2596756,11.5589191],[-10.2600214,11.5617765],[-10.2600791,11.562951],[-10.2603557,11.5634931],[-10.2610589,11.5638545],[-10.2642636,11.562951],[-10.2660617,11.5631923],[-10.268794,11.565605],[-10.2692782,11.5665763],[-10.2693358,11.5673668],[-10.2689093,11.5678186],[-10.2672839,11.567988],[-10.2663617,11.567796],[-10.265889,11.5678863],[-10.2657161,11.5682703],[-10.2683214,11.5742219],[-10.268356,11.5760288],[-10.2676989,11.5793829],[-10.2680793,11.5805686],[-10.2696586,11.5830192],[-10.2700275,11.5841711],[-10.2701427,11.5866894],[-10.2699814,11.5896255],[-10.2699237,11.590416],[-10.2699007,11.5910935],[-10.2693127,11.5915565],[-10.2684366,11.5918727],[-10.2682291,11.5923018],[-10.2680793,11.5934085],[-10.2668458,11.5943684],[-10.2661657,11.5957347],[-10.2662694,11.5964236],[-10.2684136,11.5989418],[-10.2697739,11.6020358],[-10.2703272,11.6027359],[-10.2699352,11.6031425],[-10.2688286,11.6036167],[-10.2679755,11.6051637],[-10.2673014,11.6061543],[-10.2671686,11.6063494],[-10.2662233,11.6099628],[-10.2660619,11.6115436],[-10.2651051,11.6140165],[-10.2634913,11.6171556],[-10.2627142,11.6181591],[-10.2619161,11.6198319],[-10.261935,11.6207463],[-10.2643443,11.6239078],[-10.2650936,11.6246079],[-10.2653242,11.6256128],[-10.265059,11.6263693],[-10.2639524,11.6269903],[-10.2627766,11.6272162],[-10.2617737,11.6279049],[-10.2615684,11.6281339],[-10.260033,11.629847],[-10.260448,11.6306035],[-10.2616007,11.6314842],[-10.2615777,11.632331],[-10.2604364,11.633494],[-10.260247,11.6339125],[-10.2602751,11.6343069],[-10.2621195,11.6386764],[-10.2626152,11.6392974],[-10.2640331,11.63932],[-10.2647363,11.6391393],[-10.2651628,11.6393313],[-10.2651743,11.639749],[-10.2646556,11.6405958],[-10.263945,11.6409908],[-10.2636989,11.64218],[-10.264213,11.6436853],[-10.2652684,11.6455367],[-10.2657719,11.6470249],[-10.2654842,11.6474388],[-10.2650976,11.6474476],[-10.2645491,11.6472539],[-10.2641086,11.6475356],[-10.2641895,11.648152],[-10.26472,11.6491295],[-10.2646031,11.6503711],[-10.2643424,11.6509082],[-10.2641356,11.6529335],[-10.2657,11.6548532],[-10.2654123,11.6556369],[-10.2641715,11.6572571],[-10.2639198,11.6584194],[-10.2636501,11.6586307],[-10.2625891,11.6582697],[-10.2619418,11.6579175],[-10.2614922,11.6579791],[-10.2608013,11.6585821],[-10.2607846,11.6588935],[-10.262042,11.6606756],[-10.2621332,11.6612182],[-10.261446,11.6634433],[-10.2615161,11.6649404],[-10.2616886,11.6652461],[-10.2620396,11.6658672],[-10.2623183,11.667159],[-10.2626775,11.6675896],[-10.2631853,11.6676018],[-10.264009,11.6673046],[-10.2643929,11.6673046],[-10.2646716,11.6676685],[-10.2646468,11.6682325],[-10.2640461,11.6696032],[-10.263656,11.6706161],[-10.2625355,11.6721588],[-10.2628213,11.6728275],[-10.2632581,11.6734341],[-10.2636551,11.6744838],[-10.2632501,11.675417],[-10.2625276,11.6762568],[-10.2628055,11.6777342],[-10.2626228,11.6783096],[-10.2605107,11.6794216],[-10.2590894,11.6797404],[-10.258351,11.6794605],[-10.2580413,11.6791028],[-10.2574855,11.6794138],[-10.2565406,11.6808135],[-10.2557783,11.6812567],[-10.2546428,11.68114],[-10.2536027,11.6802847],[-10.2525784,11.6804169],[-10.2513556,11.6809534],[-10.2505377,11.6811478],[-10.2485606,11.6836439],[-10.2476474,11.6839316],[-10.2450033,11.684126],[-10.2444157,11.683916],[-10.2439234,11.6831462],[-10.2435344,11.6833406],[-10.2439314,11.6849968],[-10.2437805,11.6855722],[-10.2431612,11.6861632],[-10.2419225,11.6866764],[-10.2409696,11.6868319],[-10.2405885,11.6864664],[-10.2404694,11.6854245],[-10.2401835,11.6846236],[-10.2401597,11.6840793],[-10.2393975,11.6837216],[-10.2385478,11.6837916],[-10.2380863,11.6839844],[-10.2348794,11.6853234],[-10.2342363,11.6855334],[-10.2331881,11.686482],[-10.2324973,11.6877494],[-10.2324418,11.6886514],[-10.2317748,11.6889313],[-10.2308299,11.6889469],[-10.2300835,11.6887058],[-10.22975,11.6889236],[-10.2297103,11.6898178],[-10.2301549,11.6910385],[-10.2300041,11.6914506],[-10.2285828,11.6913729],[-10.2279872,11.6912018],[-10.2276617,11.691334],[-10.2271456,11.6926092],[-10.2270979,11.6931457],[-10.2256528,11.6951129],[-10.2245888,11.6961004],[-10.2232628,11.6968935],[-10.2226699,11.6970724],[-10.2227096,11.6975623],[-10.2229796,11.6983165],[-10.222932,11.6999415],[-10.2226699,11.7011156],[-10.2223762,11.7025774],[-10.2226858,11.7028184],[-10.223599,11.7029739],[-10.2241627,11.7031916],[-10.2244962,11.7032538],[-10.2251791,11.7049177],[-10.2249568,11.7057263],[-10.2251553,11.7059907],[-10.2238292,11.7094273],[-10.2236942,11.7107179],[-10.2237816,11.7117364],[-10.2235434,11.7129338],[-10.2216456,11.7153051],[-10.2208011,11.7163274],[-10.2200655,11.7172178],[-10.2197241,11.7181196],[-10.2197797,11.7189127],[-10.2208754,11.7194258],[-10.2209151,11.7198379],[-10.2201291,11.7206309],[-10.2194859,11.7208797],[-10.219343,11.7211596],[-10.2205975,11.7227923],[-10.2210184,11.7232043],[-10.220939,11.7235231],[-10.2174849,11.7249147],[-10.2174611,11.7254201],[-10.2177787,11.7261742],[-10.2175008,11.7267496],[-10.2161748,11.7276281],[-10.2151584,11.7288642],[-10.2149679,11.7290586],[-10.2144835,11.7321684],[-10.2150234,11.7333967],[-10.2148964,11.7335522],[-10.2147614,11.7335989],[-10.2147376,11.7338632],[-10.2149282,11.7339876],[-10.2153887,11.7340731],[-10.2156745,11.7345162],[-10.2158175,11.7358146],[-10.2158016,11.7365842],[-10.215611,11.7372994],[-10.2162939,11.7384267],[-10.2168021,11.739072],[-10.217739,11.7414042],[-10.2185807,11.7427958],[-10.2196129,11.7439541],[-10.2200735,11.7439852],[-10.2207722,11.7435266],[-10.2213122,11.7428658],[-10.2217251,11.742135],[-10.2223206,11.7419096],[-10.222797,11.7412254],[-10.2231146,11.7410544],[-10.2238769,11.7411555],[-10.2246153,11.7412954],[-10.2254014,11.7412411],[-10.2258461,11.7413343],[-10.2268545,11.7412487],[-10.2284425,11.7407046],[-10.2289745,11.7406579],[-10.2304197,11.7398416],[-10.2308802,11.7397172],[-10.2314281,11.7392974],[-10.2318648,11.7392041],[-10.2325953,11.7399349],[-10.2334132,11.7410622],[-10.2338737,11.7417852],[-10.2345089,11.7420728],[-10.2358191,11.7420573],[-10.2371928,11.742788],[-10.2375501,11.7427569],[-10.2381853,11.7423682],[-10.2385585,11.7424693],[-10.2389714,11.7431456],[-10.2389873,11.7436355],[-10.2382965,11.7443507],[-10.2382568,11.7448093],[-10.2386935,11.7450659],[-10.2391302,11.7451048],[-10.2394637,11.7457423],[-10.2391381,11.7465896],[-10.2386855,11.7472116],[-10.2383123,11.7478645],[-10.2377962,11.7482144],[-10.237566,11.7486575],[-10.2381218,11.749707],[-10.2384394,11.7499091],[-10.2393208,11.7498857],[-10.2402418,11.7494037],[-10.2406785,11.7490384],[-10.2413694,11.7490694],[-10.2419649,11.7496758],[-10.2423937,11.7503444],[-10.2431003,11.7504998],[-10.2437753,11.7504221],[-10.2440929,11.7506165],[-10.2445455,11.7521868],[-10.2466497,11.7554673],[-10.2466576,11.7559882],[-10.2464353,11.7561747],[-10.2459986,11.7560037],[-10.2455142,11.7561747],[-10.245141,11.7567267],[-10.2459906,11.7580948],[-10.2483409,11.7596419],[-10.2484124,11.7602715],[-10.247936,11.7607923],[-10.2472372,11.7613909],[-10.2472769,11.7620673],[-10.248206,11.7630701],[-10.2471578,11.7649045],[-10.2466576,11.7654254],[-10.2469196,11.7658219],[-10.2475866,11.765954],[-10.2476184,11.7664671],[-10.2466655,11.7675553],[-10.2462368,11.7685891],[-10.2462526,11.7694753],[-10.2460224,11.7702682],[-10.246078,11.7721027],[-10.2458318,11.7729655],[-10.245546,11.7731055],[-10.2445455,11.7724291],[-10.2437276,11.7722737],[-10.2434577,11.772538],[-10.2428621,11.7741859],[-10.2421951,11.7751809],[-10.2419172,11.7764324],[-10.2413932,11.7768055],[-10.2404721,11.7769843],[-10.2396543,11.7766889],[-10.238622,11.7769065],[-10.2376612,11.7775595],[-10.2367719,11.778329],[-10.2343898,11.7783368],[-10.2334529,11.7796815],[-10.2321348,11.7808553],[-10.2316981,11.7809408],[-10.2309596,11.7817802],[-10.231039,11.7824565],[-10.2306023,11.7837935],[-10.2303403,11.7840422],[-10.2291731,11.7840189],[-10.2283314,11.783879],[-10.2278311,11.7842287],[-10.2274825,11.7848567],[-10.2270212,11.7858766],[-10.226521,11.7880996],[-10.226639,11.7884693],[-10.2268386,11.7887448],[-10.2272277,11.7891801],[-10.2271245,11.7896309],[-10.2260446,11.7905714],[-10.2260843,11.7910922],[-10.2265845,11.7919394],[-10.2266401,11.792569],[-10.226386,11.793012],[-10.2264654,11.7939525],[-10.2262748,11.7945588],[-10.2264734,11.7955459],[-10.2269498,11.796362],[-10.2272356,11.796533],[-10.2270848,11.7969372],[-10.2265528,11.7974036],[-10.225854,11.7975357],[-10.2252982,11.797287],[-10.2247979,11.797458],[-10.22479,11.798313],[-10.2250759,11.7991058],[-10.2250636,11.7998149],[-10.2245432,11.8007076],[-10.2248436,11.8015005],[-10.2248597,11.8018838],[-10.224731,11.8021043],[-10.2246022,11.8022041],[-10.2243984,11.8021674],[-10.2242053,11.8021096],[-10.2241141,11.8021516],[-10.2240121,11.8023459],[-10.2240041,11.8029288],[-10.2241033,11.8031309],[-10.2240846,11.8034827],[-10.2241597,11.8036245],[-10.2244896,11.8038398],[-10.2245164,11.8039763],[-10.2244198,11.8041575],[-10.2231914,11.8047955],[-10.2224082,11.8057328],[-10.2220488,11.807035],[-10.2206969,11.8083845],[-10.220198,11.8090619],[-10.2191734,11.81007],[-10.2190179,11.8104271],[-10.2189562,11.8112777],[-10.218865,11.8113854],[-10.2187872,11.8114274],[-10.218747,11.8115376],[-10.2187845,11.8117109],[-10.2187523,11.8118238],[-10.2183446,11.8120128],[-10.217945,11.8124066],[-10.2176982,11.812937],[-10.2172315,11.8134358],[-10.2171752,11.8136458],[-10.2172235,11.8144571],[-10.2169526,11.8149191],[-10.2165422,11.8152788],[-10.2165234,11.8154285],[-10.217438,11.8169722],[-10.2174944,11.8173056],[-10.217261,11.817681],[-10.2166387,11.8180617],[-10.2165502,11.8182849],[-10.2165395,11.8185947],[-10.2169874,11.8199625],[-10.2170545,11.8207606],[-10.2169794,11.820926],[-10.2165636,11.8214694],[-10.21651,11.8216847],[-10.21651,11.8222045],[-10.2163571,11.822551],[-10.215928,11.8230761],[-10.2156571,11.8240291],[-10.2157053,11.8243257],[-10.2160835,11.8249847],[-10.2164295,11.8252866],[-10.2164564,11.8254362],[-10.2162096,11.8259797],[-10.2159977,11.8273159],[-10.2158716,11.8277648],[-10.2161264,11.8291562],[-10.2160621,11.8308364],[-10.2159306,11.831112],[-10.2150455,11.831708],[-10.2143616,11.8319705],[-10.2141309,11.8319626],[-10.2137178,11.8318891],[-10.2129936,11.8321017],[-10.2126852,11.8323643],[-10.2125001,11.8330258],[-10.2118993,11.8336559],[-10.2117303,11.833711],[-10.2109256,11.8337241],[-10.2106977,11.8338396],[-10.2103838,11.8342439],[-10.208289,11.8349895],[-10.2071142,11.8359713],[-10.2065563,11.83605],[-10.2061111,11.8367378],[-10.2058643,11.8368665],[-10.2047619,11.837066],[-10.2041075,11.8374991],[-10.2037829,11.8380373],[-10.2034825,11.8381948],[-10.2030855,11.8382158],[-10.2020824,11.8380609],[-10.2011517,11.8382368],[-10.199942,11.8387277],[-10.1996014,11.8386437],[-10.1989362,11.8387986],[-10.1982898,11.8387618],[-10.1972356,11.8390349],[-10.1967394,11.8393],[-10.1967099,11.83951],[-10.1964471,11.839846],[-10.1963183,11.8403579],[-10.1963639,11.8409643],[-10.1961198,11.8415077],[-10.1957846,11.8418306],[-10.1956478,11.84187],[-10.1950523,11.841765],[-10.1949558,11.8418096],[-10.1947895,11.8424502],[-10.1946983,11.8431616],[-10.1945347,11.843348],[-10.1942718,11.8434057],[-10.1936898,11.8432036],[-10.1934752,11.8432351],[-10.1934189,11.8433716],[-10.193333,11.8440436],[-10.1935181,11.8451068],[-10.1933089,11.8458313],[-10.1928288,11.8464666],[-10.192582,11.8477896],[-10.1921153,11.8483934],[-10.1912811,11.8487688],[-10.1910692,11.848816],[-10.1906106,11.8495641],[-10.1900634,11.8500052],[-10.1898381,11.8503412],[-10.1895833,11.8504435],[-10.1884595,11.8503963],[-10.1878291,11.850307],[-10.1875207,11.8504147],[-10.1872739,11.8506745],[-10.1872417,11.8509528],[-10.1873705,11.8514122],[-10.187054,11.8521603],[-10.1863056,11.8528297],[-10.1858416,11.8529504],[-10.1852837,11.8532812],[-10.1848465,11.8533757],[-10.1845086,11.8533626],[-10.1843262,11.8534492],[-10.1837763,11.8540871],[-10.1834545,11.8542472],[-10.1827759,11.8542997],[-10.181239,11.8555466],[-10.1804692,11.8556857],[-10.180319,11.8557881],[-10.1802921,11.8558721],[-10.1804236,11.8565966],[-10.1803672,11.8567541],[-10.1804021,11.8569562],[-10.1803538,11.8575704],[-10.1802707,11.8581243],[-10.1803243,11.8583291],[-10.180842,11.8587005],[-10.1808608,11.8587556],[-10.180846,11.8588409],[-10.1808567,11.8588816],[-10.1811639,11.8591585],[-10.1811934,11.8600064],[-10.1818156,11.860933],[-10.1825345,11.8614212],[-10.1827383,11.86171],[-10.1829851,11.8626865],[-10.183205,11.863054],[-10.1837334,11.8634267],[-10.1838005,11.8635973],[-10.1838112,11.8638703],[-10.1838729,11.8639779],[-10.1841357,11.8641774],[-10.1842564,11.864411],[-10.1853883,11.8653298],[-10.1862413,11.8654242],[-10.1865685,11.8656237],[-10.1876467,11.8666789],[-10.1893285,11.8674087],[-10.1905435,11.8674165],[-10.1909164,11.8675714],[-10.1911658,11.8677184],[-10.1915494,11.8680649],[-10.1927269,11.869813],[-10.1931614,11.8712305],[-10.1931989,11.8716609],[-10.1930648,11.8719654],[-10.1922709,11.8729051],[-10.1919758,11.8740915],[-10.1917344,11.8744905],[-10.1918095,11.875026],[-10.1915628,11.8759814],[-10.1915574,11.8766061],[-10.1914501,11.8767951],[-10.1910907,11.8769211],[-10.1910371,11.8770943],[-10.1908815,11.8786954],[-10.1909056,11.8788057],[-10.1912329,11.8794776],[-10.1912946,11.8797742],[-10.1911604,11.8811548],[-10.1913562,11.8816614],[-10.1913536,11.8824803],[-10.1914582,11.8827402],[-10.1917049,11.8829711],[-10.1922467,11.8833937],[-10.1923379,11.8836352],[-10.1923138,11.8838294],[-10.1921985,11.8843675],[-10.1922521,11.8845565],[-10.1923057,11.8846588],[-10.1920295,11.8848242],[-10.1917881,11.8848426],[-10.1912999,11.8848058],[-10.190565,11.8846378],[-10.1905087,11.8845748],[-10.190447,11.8844383],[-10.1903853,11.8843754],[-10.1900795,11.8843071],[-10.1897389,11.8844121],[-10.1893526,11.8846588],[-10.1891246,11.8850604],[-10.1888269,11.8854095],[-10.1874349,11.8859659],[-10.1871479,11.8866536],[-10.1867348,11.8866956],[-10.181876,11.8908662],[-10.1817513,11.8910211],[-10.1812443,11.8912888],[-10.1811411,11.8915197],[-10.1811424,11.8916313],[-10.1812081,11.8917245],[-10.1812175,11.8918124],[-10.1811826,11.8918714],[-10.181074,11.8919344],[-10.1808983,11.8919292],[-10.180618,11.8917835],[-10.1804075,11.8918518],[-10.1802666,11.891962],[-10.1801969,11.8920788],[-10.1801902,11.8921707],[-10.180213,11.8922428],[-10.1803444,11.8924174],[-10.1803713,11.8924909],[-10.1803257,11.8926247],[-10.1800776,11.8930591],[-10.1798657,11.8932441],[-10.1798067,11.8933806],[-10.1797745,11.893962],[-10.1796377,11.8942126],[-10.1795357,11.8947179],[-10.1792635,11.895084],[-10.1791951,11.8952861],[-10.1792648,11.8957191],[-10.1792407,11.8958372],[-10.1791683,11.8959462],[-10.1791482,11.8960407],[-10.1791643,11.8961089],[-10.1794606,11.896538],[-10.1794553,11.8967099],[-10.1793212,11.8970039],[-10.1793453,11.8971377],[-10.1795411,11.8977099],[-10.1797584,11.8982873],[-10.1797168,11.8986771],[-10.1797597,11.8990235],[-10.1797248,11.8992663],[-10.1793534,11.8998594],[-10.1790074,11.9001586],[-10.178833,11.9006402],[-10.1788303,11.9011415],[-10.1789966,11.9016507],[-10.1789698,11.9017609],[-10.1788598,11.9018921],[-10.1777065,11.9023724],[-10.1772451,11.9028291],[-10.1767597,11.9031283],[-10.1765639,11.9034196],[-10.1765397,11.9035824],[-10.176757,11.904354],[-10.1765558,11.9049812],[-10.17658,11.9051334],[-10.1766792,11.9053198],[-10.1765102,11.906115],[-10.1765209,11.9062646],[-10.1770923,11.9070572],[-10.177103,11.9084666],[-10.1770359,11.9086503],[-10.1767704,11.9088602],[-10.1767516,11.9090466],[-10.1765853,11.909582],[-10.1757753,11.9099966],[-10.1753944,11.9104953],[-10.1747802,11.9105898],[-10.1747078,11.910763],[-10.1745844,11.9108706],[-10.1742545,11.9108785],[-10.1739889,11.9110175],[-10.1739004,11.911154],[-10.1737556,11.9112065],[-10.1734123,11.9112144],[-10.1731655,11.911406],[-10.1724762,11.912831],[-10.1722482,11.9130174],[-10.1713389,11.9134399],[-10.1707917,11.9134845],[-10.169346,11.9143558],[-10.1685521,11.9145553],[-10.168359,11.9145238],[-10.1682973,11.9144293],[-10.1681525,11.9141485],[-10.167793,11.9139622],[-10.1670206,11.9141091],[-10.1667497,11.9142509],[-10.1666397,11.9144398],[-10.1664948,11.9146183],[-10.1660845,11.9146078],[-10.1660174,11.9150146],[-10.1660845,11.9153111],[-10.1662159,11.9154528],[-10.1664922,11.9154765],[-10.1669911,11.915773],[-10.1671171,11.9157337],[-10.1672351,11.9155893],[-10.1674148,11.9149542],[-10.1675892,11.9148519],[-10.1679701,11.9148965],[-10.1682866,11.9152481],[-10.1685119,11.9156471],[-10.168477,11.9159672],[-10.1681471,11.9163058],[-10.1680934,11.9164528],[-10.1681256,11.916668],[-10.1682866,11.9171298],[-10.1688713,11.9176442],[-10.1699603,11.9182163],[-10.1702124,11.9187622],[-10.1704162,11.9203526],[-10.1702392,11.9211294],[-10.170266,11.9215388],[-10.1711243,11.9226253],[-10.1726747,11.9251446],[-10.1737744,11.9260632],[-10.1741499,11.9265985],[-10.1742196,11.9273018],[-10.1737315,11.9290496],[-10.1738656,11.9318103],[-10.1737073,11.9324244],[-10.1739138,11.93381],[-10.1749733,11.9353924],[-10.1752013,11.936101],[-10.1759282,11.9370011],[-10.1761776,11.9375522],[-10.1761615,11.9381032],[-10.1764271,11.9393077],[-10.1763144,11.9399822],[-10.1760703,11.9405595],[-10.1761079,11.9411001],[-10.1760274,11.9416301],[-10.1757968,11.942071],[-10.1757538,11.9423282],[-10.1759684,11.9425224],[-10.1765156,11.9427953],[-10.1769018,11.9433568],[-10.178196,11.9445206],[-10.1782107,11.9446046],[-10.1781933,11.9446886],[-10.1780391,11.9448683],[-10.177799,11.9450009],[-10.1775268,11.9450546],[-10.1774248,11.9451268],[-10.1773243,11.94538],[-10.1773471,11.9455755],[-10.1776019,11.9458708],[-10.1775938,11.9462329],[-10.1774973,11.9465583],[-10.177229,11.9468653],[-10.1766926,11.9469676],[-10.1765531,11.9472773],[-10.1766121,11.9477129],[-10.1765585,11.9480435],[-10.1761776,11.9484529],[-10.1756372,11.94863],[-10.1752067,11.9490905],[-10.1748875,11.9491758],[-10.1746018,11.9491574],[-10.1740909,11.949492],[-10.1738441,11.9497977],[-10.1735799,11.94982],[-10.173195,11.9499906],[-10.1727766,11.9499853],[-10.1721275,11.9502989],[-10.1718405,11.9503186],[-10.1713429,11.9502241],[-10.1711941,11.950211],[-10.17084,11.9504629],[-10.1703894,11.9505863],[-10.1702419,11.9506965],[-10.1701131,11.9511557],[-10.1694426,11.9519639],[-10.1691127,11.9521476],[-10.1687881,11.9526934],[-10.168654,11.953638],[-10.1684904,11.9541786],[-10.1681685,11.9547165],[-10.1680371,11.955509],[-10.1678628,11.9576449],[-10.1675315,11.9586591],[-10.1774141,11.9652518],[-10.1766765,11.9657346],[-10.1765022,11.9660128],[-10.1763868,11.9670938],[-10.1766899,11.9673195],[-10.1772183,11.9675425],[-10.1776502,11.9680358],[-10.1780525,11.9682746],[-10.1788491,11.9684792],[-10.1789913,11.9685973],[-10.1790771,11.9689515],[-10.1793118,11.9692375],[-10.1792622,11.9699106],[-10.1793037,11.9699591],[-10.1794888,11.9700168],[-10.1796953,11.9702674],[-10.1798455,11.9704472],[-10.1798683,11.9706571],[-10.179643,11.9714731],[-10.1795894,11.9718641],[-10.1799354,11.9729923],[-10.1800132,11.9736273],[-10.1803941,11.9749917],[-10.1807079,11.9752829],[-10.1809278,11.9756057],[-10.1810391,11.9756765],[-10.1814093,11.975708],[-10.1816574,11.9758431],[-10.1817177,11.9759376],[-10.1817352,11.9762105],[-10.1817834,11.9762826],[-10.182045,11.9764164],[-10.1823655,11.9764689],[-10.1825237,11.9763836],[-10.1826364,11.9763692],[-10.1828523,11.9764125],[-10.1829341,11.976608],[-10.1830736,11.9775014],[-10.183138,11.977567],[-10.1832654,11.977563],[-10.1833324,11.9775867],[-10.1834719,11.9778648],[-10.1840767,11.978425],[-10.1841585,11.978665],[-10.1843356,11.9787621],[-10.1846132,11.9787752],[-10.1848894,11.9789366],[-10.1854004,11.9789222],[-10.1858135,11.9789812],[-10.1859248,11.9790153],[-10.1861353,11.9792711],[-10.1864344,11.9795361],[-10.1864666,11.9797749],[-10.1866128,11.9799218],[-10.1867925,11.9799573],[-10.1868649,11.9800465],[-10.1868729,11.9802105],[-10.1870352,11.9805384],[-10.1871103,11.981239],[-10.1870567,11.9818398],[-10.1871237,11.9823488],[-10.1868367,11.9833078],[-10.1868528,11.9834154],[-10.186834,11.9835479],[-10.1867616,11.9836292],[-10.1867643,11.9837499],[-10.1867643,11.9840438],[-10.1869494,11.9841933],[-10.1869547,11.9844793],[-10.1868475,11.9846131],[-10.1867804,11.9848132],[-10.1867154,11.9848473],[-10.1867147,11.9849227],[-10.1866758,11.9850185],[-10.1866771,11.9851241],[-10.1866476,11.9851812],[-10.1865886,11.9852094],[-10.1865256,11.9852743],[-10.1865256,11.9855918],[-10.1866382,11.9859565],[-10.1866061,11.9863396],[-10.1859757,11.9876357],[-10.1858054,11.9877249],[-10.1858081,11.987801],[-10.1857156,11.9880581],[-10.185678,11.9883493],[-10.1860428,11.9888295],[-10.1863968,11.98969],[-10.1864047,11.9897958],[-10.1864505,11.9904116],[-10.1866758,11.9908471],[-10.1870781,11.9912511],[-10.187341,11.9916499],[-10.1876923,11.9918756],[-10.1880276,11.9922639],[-10.1898301,11.9934681],[-10.1901412,11.9939404],[-10.1900661,11.9946016],[-10.1903799,11.9951079],[-10.190396,11.9952522],[-10.1901667,11.9957809],[-10.190164,11.9959383],[-10.1899374,11.9963948],[-10.1896665,11.9967201],[-10.1896665,11.9968002],[-10.1898046,11.9971176],[-10.1899105,11.9976187],[-10.1898649,11.9982707],[-10.1899628,11.9983652],[-10.1900916,11.9986013],[-10.1905328,11.9989633],[-10.1906978,11.9992283],[-10.1907782,11.9995589],[-10.1907635,11.9997622],[-10.1904845,12.0002135],[-10.190447,12.0005637],[-10.1905851,12.0009258],[-10.19062,12.0012564],[-10.1905623,12.001377],[-10.1904081,12.0015069],[-10.1903853,12.0016617],[-10.1902753,12.0018519],[-10.1902002,12.0019123],[-10.1901197,12.0019109],[-10.1900272,12.0018244],[-10.18994,12.0017981],[-10.1898193,12.0018349],[-10.1891515,12.0035061],[-10.1891287,12.0043207],[-10.189185,12.004423],[-10.1893714,12.0044952],[-10.1893915,12.0045883],[-10.1892293,12.0050408],[-10.1892561,12.0055092],[-10.1895605,12.0060365],[-10.189826,12.0067999],[-10.190046,12.0069888],[-10.190455,12.0082166],[-10.1910961,12.0090706],[-10.1911712,12.0095481],[-10.1910196,12.0099967],[-10.1909499,12.0104899],[-10.1908131,12.0111392],[-10.1906776,12.0114396],[-10.190683,12.011555],[-10.1908439,12.0116705],[-10.1915225,12.0116875],[-10.1915775,12.0117938],[-10.1915614,12.0119433],[-10.1914769,12.0121204],[-10.1913093,12.0122057],[-10.1906133,12.0122476],[-10.190329,12.0123277],[-10.1898368,12.0126936],[-10.1898207,12.0129232],[-10.1898663,12.0129966],[-10.190105,12.0130544],[-10.1902163,12.0131986],[-10.1902485,12.0133862],[-10.1903115,12.0134334],[-10.1904228,12.0134361],[-10.1904765,12.013461],[-10.1905502,12.0136],[-10.1905301,12.0136696],[-10.1904376,12.0137863],[-10.1894304,12.0145589],[-10.1891595,12.0146494],[-10.1890697,12.0148318],[-10.1889436,12.0150128],[-10.188894,12.0150534],[-10.1888631,12.0151676],[-10.1886874,12.0154942],[-10.1886755,12.0157617],[-10.1886566,12.0161881],[-10.1886794,12.0163652],[-10.1887666,12.0165396],[-10.1887666,12.0167167],[-10.1888108,12.0168492],[-10.1889181,12.0169895],[-10.1891086,12.0174263],[-10.1893875,12.0178198],[-10.1895149,12.0178985],[-10.1900084,12.0179353],[-10.1900929,12.0179812],[-10.1901814,12.018174],[-10.1902002,12.0183039],[-10.1900071,12.0187538],[-10.1896732,12.0192339],[-10.1895605,12.0197179],[-10.1896195,12.0204708],[-10.1894854,12.0208092],[-10.1894331,12.0208656],[-10.1892829,12.0209155],[-10.1890402,12.0210925],[-10.1885292,12.0216618],[-10.1884125,12.0220448],[-10.1880625,12.0224226],[-10.1879525,12.0227322],[-10.1879083,12.0227886],[-10.1877634,12.0228082],[-10.1877071,12.0228515],[-10.1876521,12.0230234],[-10.1876561,12.0233591],[-10.1877527,12.023527],[-10.1881215,12.0236517],[-10.1881604,12.0236805],[-10.1881979,12.0238235],[-10.1883173,12.0241488],[-10.1883066,12.0244911],[-10.1881845,12.0247456],[-10.1881416,12.0249607],[-10.1882704,12.0252178],[-10.188379,12.0258828],[-10.1882972,12.0261215],[-10.1882905,12.0262199],[-10.1884018,12.0264232],[-10.1883736,12.0266423],[-10.1882087,12.0268653],[-10.1881483,12.0272194],[-10.1882395,12.0275578],[-10.1886593,12.0278818],[-10.1888511,12.028312],[-10.1888524,12.0286885],[-10.1889905,12.0290413],[-10.1889919,12.0292289],[-10.1888953,12.0293915],[-10.18889,12.0296893],[-10.1889637,12.030008],[-10.1889503,12.0301365],[-10.1888618,12.0302087],[-10.1886874,12.0302782],[-10.18832,12.0303149],[-10.1882462,12.0303438],[-10.1881765,12.0304644],[-10.1881255,12.0310206],[-10.1881604,12.0312672],[-10.1882127,12.0313511],[-10.1883642,12.0314311],[-10.1884715,12.0315439],[-10.1884648,12.0316134],[-10.1883937,12.0317158],[-10.1884045,12.0317905],[-10.1885587,12.0319361],[-10.1886942,12.0319702],[-10.1888444,12.0319191],[-10.1889262,12.0318049],[-10.1889543,12.0315741],[-10.1889811,12.0314574],[-10.1891582,12.0312514],[-10.189358,12.0311334],[-10.1895243,12.0311124],[-10.189582,12.0310652],[-10.1896732,12.0308868],[-10.189763,12.0308238],[-10.1899923,12.0308173],[-10.1901385,12.0308632],[-10.190341,12.03122],[-10.190455,12.0315374],[-10.1905087,12.0320974],[-10.1906696,12.0325696],[-10.1906347,12.033089],[-10.1905476,12.033253],[-10.1903866,12.0333369],[-10.1901774,12.0336203],[-10.1898099,12.0338695],[-10.1896852,12.0341147],[-10.1896269,12.0344434],[-10.1896597,12.0348925],[-10.1898301,12.0352113],[-10.1902713,12.0355903],[-10.1905543,12.0356585],[-10.1915601,12.0355352],[-10.1919436,12.0356008],[-10.1922762,12.0357844],[-10.1923808,12.0360074],[-10.1927523,12.0365085],[-10.1930246,12.037243],[-10.1935785,12.0378647],[-10.1939835,12.0380339],[-10.1948411,12.0381442],[-10.1950443,12.0381703],[-10.1952454,12.0380929],[-10.1958033,12.0370043],[-10.1961279,12.0368154],[-10.196325,12.0368311],[-10.1964149,12.0369387],[-10.1964927,12.0371538],[-10.1972424,12.0382582],[-10.197406,12.0387028],[-10.1975428,12.0389428],[-10.1978378,12.0391763],[-10.1986854,12.0394438],[-10.1992312,12.0394727],[-10.2000198,12.0395645],[-10.2025652,12.0401797],[-10.2027395,12.040303],[-10.2028039,12.0404276],[-10.2028871,12.0404958],[-10.203685,12.0406912],[-10.203858,12.0407463],[-10.2047123,12.0413575],[-10.2057087,12.0416736],[-10.2059917,12.0420828],[-10.2062385,12.0422271],[-10.2068594,12.0429091],[-10.2098393,12.0449158],[-10.2100915,12.044984],[-10.2104241,12.0449525],[-10.2107325,12.044685],[-10.2109203,12.0446587],[-10.2114272,12.0449709],[-10.2116391,12.0453722],[-10.2126423,12.0460516],[-10.2128863,12.0464294],[-10.2136454,12.0471507],[-10.2138895,12.0474865],[-10.2148417,12.0483285],[-10.2151849,12.0489319],[-10.2155793,12.0491207],[-10.2160352,12.0494565],[-10.2168922,12.0504441],[-10.2170478,12.0506906],[-10.2172677,12.050772],[-10.2175064,12.0509018],[-10.2176097,12.0510461],[-10.2176607,12.051067],[-10.2177505,12.0510513],[-10.2178296,12.0510867],[-10.2182186,12.0516507],[-10.218295,12.0519156],[-10.2182736,12.0520651],[-10.2180938,12.0522409],[-10.2181005,12.0523419],[-10.2184412,12.0529963],[-10.2184251,12.0530816],[-10.2183218,12.0531655],[-10.2181676,12.0532324],[-10.2178042,12.0532678],[-10.2177157,12.0533439],[-10.2176298,12.0536849],[-10.2176379,12.0539262],[-10.217603,12.0541374],[-10.2176473,12.0547866],[-10.217599,12.0550541],[-10.2175105,12.0552246],[-10.2172235,12.0554555],[-10.2170894,12.0561427],[-10.2171779,12.056342],[-10.2175561,12.0565099],[-10.2176178,12.0566883],[-10.2174541,12.0570214],[-10.2175775,12.057769],[-10.2174783,12.0585506],[-10.2175373,12.0587736],[-10.2179611,12.0591828],[-10.2184439,12.0594425],[-10.2186665,12.0594792],[-10.2188784,12.0595421],[-10.2194537,12.0601559],[-10.2194604,12.0602084],[-10.2193907,12.0603487],[-10.2192807,12.0604576],[-10.2191721,12.0604838],[-10.2189991,12.0605468],[-10.218645,12.0608602],[-10.2185592,12.0610189],[-10.2185753,12.0611238],[-10.2189897,12.0616615],[-10.2190997,12.0619842],[-10.2192043,12.0621651],[-10.2194631,12.0623855],[-10.2195409,12.0625193],[-10.2195248,12.0627501],[-10.2193987,12.0629966],[-10.2191976,12.063133],[-10.2187765,12.0635684],[-10.2186745,12.0637363],[-10.2184975,12.0646806],[-10.2185404,12.064893],[-10.2188328,12.0651816],[-10.219101,12.0655173],[-10.2191531,12.0657431],[-10.2192485,12.0661573],[-10.2194631,12.0665639],[-10.2200612,12.0672511],[-10.220823,12.0689245],[-10.2212977,12.069533],[-10.2212709,12.0696432],[-10.2203617,12.0704747],[-10.2202651,12.0707238],[-10.2202785,12.0710753],[-10.2204502,12.0713297],[-10.2213058,12.0719172],[-10.2214345,12.0721638],[-10.2218503,12.0726779],[-10.2221265,12.073213],[-10.2223679,12.0734411],[-10.2231216,12.0751985],[-10.2234703,12.0753899],[-10.2238163,12.0757571],[-10.2238432,12.076043],[-10.2236232,12.076704],[-10.2233684,12.0768482],[-10.2230546,12.0772181],[-10.2226308,12.0773807],[-10.2223089,12.0776062],[-10.222207,12.0777898],[-10.2222928,12.0780495],[-10.2226657,12.07854],[-10.2234086,12.0789045],[-10.2235401,12.0791118],[-10.2235723,12.0793583],[-10.223465,12.0796153],[-10.2225745,12.0803156],[-10.2223921,12.080709],[-10.2224457,12.0812441],[-10.2218315,12.0825529],[-10.221692,12.0832427],[-10.2218476,12.0837567],[-10.2215552,12.0841213],[-10.2210054,12.0843547],[-10.2209061,12.0847849],[-10.2204475,12.0856399],[-10.220021,12.0858418],[-10.2199566,12.0860385],[-10.2200827,12.0873079],[-10.2199486,12.0876122],[-10.2194014,12.0882075],[-10.2193049,12.0891937],[-10.2191386,12.089616],[-10.2188998,12.090109],[-10.2187496,12.0901825],[-10.2185699,12.0901589],[-10.2181596,12.0898127],[-10.2176848,12.0897576],[-10.2174246,12.0898913],[-10.2169713,12.0907962],[-10.2168962,12.0911424],[-10.2166334,12.0913863],[-10.2156651,12.0917954],[-10.2152601,12.0924406],[-10.2151421,12.0925193],[-10.2148819,12.0925114],[-10.2147371,12.0925586],[-10.2146378,12.0927763],[-10.214662,12.0930727],[-10.2147988,12.0932405],[-10.2150106,12.0939277],[-10.2149919,12.0943473],[-10.2146968,12.0950213],[-10.2144688,12.0950738],[-10.2138439,12.0949269],[-10.2136025,12.0946725],[-10.2134013,12.0946253],[-10.212822,12.095121],[-10.212763,12.0957373],[-10.2126101,12.0960153],[-10.2123714,12.0962199],[-10.2117544,12.0962199],[-10.2108291,12.0967785],[-10.2105555,12.0970513],[-10.2096355,12.0975522],[-10.2094692,12.0975627],[-10.2093136,12.0974053],[-10.2091849,12.0971168],[-10.2082139,12.0966395],[-10.2079189,12.0963222],[-10.2079189,12.0962015],[-10.2075407,12.0959734],[-10.2073878,12.0959786],[-10.2064866,12.0961858],[-10.2057517,12.0961176],[-10.2045818,12.0956663],[-10.2037937,12.0953623],[-10.2024418,12.0956036],[-10.2019107,12.0958501],[-10.2017444,12.0961884],[-10.2017123,12.0965871],[-10.2019966,12.0975863],[-10.2019617,12.0979167],[-10.2018625,12.0981685],[-10.2015781,12.0983678],[-10.2011275,12.0985488],[-10.2008539,12.0985619],[-10.2006233,12.098457],[-10.200111,12.0983573],[-10.1996389,12.0983521],[-10.1992527,12.0985829],[-10.1991695,12.0987953],[-10.1989308,12.0989238],[-10.1985164,12.0997539],[-10.198499,12.0999965],[-10.1986143,12.1003033],[-10.1986223,12.1005026],[-10.1985446,12.1006521],[-10.1982576,12.1007623],[-10.1982334,12.1008882],[-10.1984024,12.1015596],[-10.1983568,12.1018507],[-10.19811,12.1022782],[-10.1977345,12.1027292],[-10.1976675,12.1029181],[-10.1976943,12.1031777],[-10.1981208,12.1035081],[-10.1981261,12.1036839],[-10.1979947,12.1040432],[-10.1974475,12.104788],[-10.1970103,12.1051158],[-10.1968789,12.1053912],[-10.1969138,12.1060599],[-10.1971257,12.1068965],[-10.1970962,12.1072637],[-10.196844,12.1079114],[-10.1963452,12.1086169],[-10.1963022,12.10879],[-10.1966456,12.110235],[-10.1966268,12.1106756],[-10.19638,12.1112027],[-10.1960823,12.1115095],[-10.196034,12.1117692],[-10.1957819,12.1121153],[-10.1959026,12.1131984],[-10.1957551,12.1138068],[-10.1956424,12.1140376],[-10.1947707,12.1147955],[-10.1934162,12.1150604],[-10.192456,12.1155219],[-10.1920375,12.1164188],[-10.191839,12.1166575],[-10.1916862,12.1167361],[-10.1914448,12.1166916],[-10.1902914,12.1162641],[-10.1898515,12.1163637],[-10.1895323,12.1168673],[-10.1891407,12.1172187],[-10.1887652,12.1178035],[-10.188489,12.1180002],[-10.1871049,12.1195841],[-10.1863003,12.1201322],[-10.1859221,12.1206357],[-10.1856887,12.1207511],[-10.1842108,12.1209897],[-10.1838943,12.1211628],[-10.1838246,12.1213228],[-10.1838729,12.1215431],[-10.1841411,12.1218236],[-10.1841518,12.1219128],[-10.1840875,12.1220046],[-10.18291,12.1227362],[-10.1821167,12.1229551],[-10.1819122,12.1230116],[-10.1812175,12.1235413],[-10.179804,12.1255999],[-10.1786909,12.1268245],[-10.1785085,12.1269307],[-10.1772666,12.1263433],[-10.1765612,12.1261493],[-10.1763211,12.1262581],[-10.1756975,12.1263263],[-10.1754239,12.1265098],[-10.1751034,12.1266462],[-10.1748727,12.1269242],[-10.1746139,12.1271222],[-10.1742974,12.1278236],[-10.1739138,12.1282301],[-10.1734498,12.1291086],[-10.173187,12.1294364],[-10.1729509,12.1296121],[-10.1725808,12.1297511],[-10.1719934,12.1297497],[-10.1718767,12.1297327],[-10.1713228,12.1295203],[-10.170258,12.1292305],[-10.1696116,12.1291545],[-10.1694882,12.1291138],[-10.1689249,12.1291296],[-10.1687425,12.1291899],[-10.1686004,12.1294233],[-10.1683,12.1296068],[-10.1681578,12.1298612],[-10.168013,12.1299871],[-10.167836,12.1300579],[-10.1673666,12.1307371],[-10.1666772,12.1312956],[-10.1662213,12.1313428],[-10.164966,12.1319092],[-10.1645744,12.1322029],[-10.1638931,12.1325963],[-10.1635552,12.1331837],[-10.1627666,12.1337711],[-10.1620424,12.1341067],[-10.1614791,12.1349511],[-10.1608729,12.1352133],[-10.1603472,12.1352762],[-10.158931,12.1350612],[-10.1582283,12.1348882],[-10.1580298,12.1350455],[-10.1579064,12.1358689],[-10.1577455,12.1362098],[-10.1572251,12.1365402],[-10.1566243,12.1366241],[-10.1561844,12.1364825],[-10.1558358,12.1360524],[-10.1543069,12.1355647],[-10.1539797,12.1353392],[-10.1533628,12.1340543],[-10.1533654,12.1339258],[-10.1534191,12.1338314],[-10.1542613,12.133341],[-10.1545644,12.1330211],[-10.1545832,12.1328428],[-10.1545376,12.1327353],[-10.1543713,12.1326985],[-10.1536015,12.1329686],[-10.1530892,12.1330761],[-10.1526091,12.1329398],[-10.1522094,12.1329319],[-10.151799,12.1331942],[-10.1513162,12.133341],[-10.1507288,12.1333725],[-10.1505652,12.1334039],[-10.150466,12.1335193],[-10.1504552,12.133695],[-10.1505438,12.1338078],[-10.1506537,12.1339179],[-10.1506162,12.1341093],[-10.1504204,12.1342929],[-10.1500717,12.1343401],[-10.1499376,12.1342955],[-10.1498142,12.134146],[-10.1496747,12.1340805],[-10.1495165,12.1341172],[-10.1493797,12.1343453],[-10.1492643,12.1344292],[-10.1491061,12.1344476],[-10.1486206,12.1342745],[-10.148052,12.1342824],[-10.1476496,12.1344135],[-10.1475263,12.1346259],[-10.1476631,12.1352107],[-10.1476282,12.1355227],[-10.1475343,12.1356853],[-10.14714,12.1358767],[-10.1467833,12.135903],[-10.1461637,12.1356512],[-10.1456031,12.1355437],[-10.1454797,12.1353234],[-10.1445115,12.1347229],[-10.1438811,12.1346076],[-10.1434976,12.134681],[-10.1433152,12.1350114],[-10.143283,12.135313],[-10.1435298,12.1356303],[-10.1443854,12.1361206],[-10.1446,12.1365166],[-10.1446268,12.136729],[-10.144482,12.1370017],[-10.1442835,12.1371354],[-10.1437122,12.1373373],[-10.1423201,12.1371564],[-10.1420331,12.1372482],[-10.1411802,12.1383836],[-10.1409093,12.1385226],[-10.1404855,12.138499],[-10.1401636,12.1383758],[-10.1400831,12.1381581],[-10.1401636,12.1370725],[-10.1401019,12.1369492],[-10.1400188,12.1369047],[-10.1399303,12.136965],[-10.1392007,12.1380244],[-10.1389244,12.1383023],[-10.1370791,12.1388582],[-10.1367545,12.1389028],[-10.1359069,12.1388058],[-10.1351801,12.1385908],[-10.1345927,12.1386327],[-10.1344532,12.1386013],[-10.1339355,12.1383154],[-10.1329806,12.1379719],[-10.1322323,12.1371013],[-10.131602,12.1365008],[-10.1312426,12.1363592],[-10.1309904,12.1363697],[-10.1307142,12.136548],[-10.1304486,12.137159],[-10.1305023,12.137555],[-10.1306418,12.1376389],[-10.1312131,12.1375209],[-10.1314545,12.1375471],[-10.1315618,12.1376677],[-10.1315483,12.1378382],[-10.1311621,12.1385855],[-10.1307544,12.1390602],[-10.1302689,12.1394745],[-10.1299632,12.1395531],[-10.1297218,12.1395059],[-10.1295957,12.1394168],[-10.1292926,12.1388818],[-10.1290968,12.1386878],[-10.1289177,12.138637],[-10.1287428,12.1386406],[-10.1281956,12.1387927],[-10.1267928,12.1385698],[-10.126648,12.1386327],[-10.1265594,12.1388845],[-10.1263261,12.1392044],[-10.1262966,12.1395558],[-10.1262054,12.1396659],[-10.1259694,12.1397183],[-10.125795,12.1397865],[-10.1255482,12.1400514],[-10.1252666,12.140269],[-10.125044,12.140311],[-10.1247919,12.1402926],[-10.1241669,12.1398678],[-10.1225737,12.1394535],[-10.1219675,12.1394954],[-10.1216,12.1397682],[-10.1211065,12.1399386],[-10.1207417,12.1404263],[-10.1205245,12.1411606],[-10.1205701,12.1423379],[-10.1204547,12.1425975],[-10.1201972,12.1428807],[-10.1200604,12.1429214],[-10.1186523,12.1425634],[-10.1180555,12.1423143],[-10.1174667,12.1421636],[-10.1173098,12.1421518],[-10.1171999,12.1421911],[-10.117114,12.1423038],[-10.1170899,12.1425779],[-10.1170135,12.1427693],[-10.1170376,12.1431089],[-10.1168713,12.1435153],[-10.116705,12.1437356],[-10.1164314,12.1438247],[-10.1160599,12.1437578],[-10.1152459,12.1432269],[-10.1150675,12.1429935],[-10.1144452,12.1426998],[-10.114232,12.1427326],[-10.1140657,12.1429187],[-10.1136392,12.1450178],[-10.1135373,12.145301],[-10.1134354,12.1454636],[-10.1132476,12.1454819],[-10.1127702,12.1452066],[-10.1116142,12.1450388],[-10.1114291,12.1449444],[-10.1104125,12.1435494],[-10.1100102,12.1433344],[-10.1096106,12.143316],[-10.1082426,12.1437985],[-10.1078403,12.1438378],[-10.1067674,12.1436123],[-10.1052091,12.1431377],[-10.1048791,12.1431351],[-10.10342,12.1435599],[-10.1020628,12.1442076],[-10.101639,12.1442154],[-10.1005983,12.1439348],[-10.1002818,12.1439952],[-10.1001504,12.1441263],[-10.1000834,12.1445983],[-10.0997776,12.1454924],[-10.0996515,12.145697],[-10.0994316,12.1458412],[-10.0974548,12.1461742],[-10.0954163,12.1463472],[-10.095183,12.1463158],[-10.0944239,12.1457127],[-10.0943729,12.1455947],[-10.0941959,12.145495],[-10.0938606,12.1455082],[-10.0933805,12.1457782],[-10.0930908,12.1461978],[-10.0926027,12.1478865],[-10.0924672,12.148205],[-10.0922728,12.1483663],[-10.0906339,12.1488698],[-10.0899178,12.148854],[-10.0894457,12.1489484],[-10.089325,12.1490717],[-10.089317,12.1492237],[-10.0895817,12.1503261],[-10.0888376,12.150436],[-10.0871705,12.1508724],[-10.0859421,12.1511726],[-10.0847833,12.151718],[-10.0839465,12.1518229],[-10.0823372,12.151781],[-10.0809639,12.1515712],[-10.0801281,12.1506996],[-10.0792902,12.1485295],[-10.0787752,12.1468304],[-10.0781755,12.1460007],[-10.0770371,12.145341],[-10.0760715,12.1448375],[-10.0752561,12.1448585],[-10.074592,12.1455602],[-10.0745491,12.1463993],[-10.0746349,12.1473223],[-10.0747412,12.148089],[-10.0742691,12.1485295],[-10.0730889,12.1491798],[-10.0719302,12.1494945],[-10.0706213,12.1495784],[-10.0696986,12.1495154],[-10.0683264,12.148497],[-10.0671891,12.1469657],[-10.0666731,12.1452361],[-10.0661366,12.1428027],[-10.0659864,12.1409986],[-10.0653652,12.1396026],[-10.0650637,12.1381666],[-10.064699,12.1374114],[-10.0639265,12.1373695],[-10.0626176,12.1382925],[-10.062167,12.1388379],[-10.0622539,12.1395816],[-10.0624674,12.1404113],[-10.0628536,12.1413343],[-10.0632398,12.1427817],[-10.0641207,12.1456651],[-10.0642054,12.1471031],[-10.0641851,12.1487697],[-10.0641196,12.1502287],[-10.0637763,12.1519698],[-10.063477,12.1528392],[-10.0629824,12.1536689],[-10.0623815,12.1540884],[-10.0613516,12.1544031],[-10.0604718,12.154466],[-10.0600856,12.1542772],[-10.0599139,12.1535011],[-10.0600856,12.1524312],[-10.0597852,12.1511517],[-10.0589483,12.1499979],[-10.0560515,12.147187],[-10.0545066,12.1455717],[-10.0529187,12.1439145],[-10.051481,12.1429915],[-10.0503223,12.142509],[-10.0467174,12.1426139],[-10.045666,12.1426768],[-10.0451939,12.1432642],[-10.0449375,12.1443225],[-10.04468,12.1458119],[-10.0442283,12.1473758],[-10.0438646,12.1481194],[-10.0432413,12.1486344],[-10.0424688,12.1485505],[-10.0417832,12.1476789],[-10.0409882,12.1463269],[-10.0407307,12.1450893],[-10.0403445,12.1434111],[-10.0390796,12.1425604],[-10.0374263,12.1419846],[-10.036568,12.1411665],[-10.036289,12.140642],[-10.0355594,12.1399078],[-10.0350445,12.1388799],[-10.0352805,12.1376631],[-10.0344222,12.1372855],[-10.0329202,12.1364884],[-10.0313967,12.135901],[-10.0309031,12.1353136],[-10.0295942,12.1343696],[-10.0287584,12.1332672],[-10.0282209,12.1331738],[-10.0265268,12.1331623],[-10.0253671,12.1327962],[-10.0244444,12.1324606],[-10.0233286,12.1314116],[-10.0228994,12.1313067],[-10.0221578,12.1304649],[-10.0213116,12.1301319],[-10.0202816,12.1299431],[-10.0187366,12.1298802],[-10.017535,12.1299431],[-10.0168484,12.1302578],[-10.0162905,12.131055],[-10.0154322,12.1315375],[-10.0137799,12.1322718],[-10.0127499,12.1324186],[-10.0113767,12.1322927],[-10.0106267,12.1321763],[-10.0101321,12.1323976],[-10.0100688,12.1328686],[-10.0102834,12.1332882],[-10.0109046,12.133929],[-10.0110548,12.1343906],[-10.0107758,12.1350828],[-10.0100892,12.1359639],[-10.0092309,12.1364464],[-10.0084155,12.1357332],[-10.0067847,12.1335934],[-10.0058202,12.1330364],[-10.0042098,12.1323766],[-10.0015072,12.1316938],[-9.9990181,12.1312742],[-9.9979876,12.1307713],[-9.9975912,12.130498],[-9.9968718,12.1301944],[-9.9963032,12.1298063],[-9.9958102,12.1293232],[-9.9957728,12.129237],[-9.9956058,12.1288517],[-9.9952308,12.1276135],[-9.9952303,12.1267224],[-9.9954556,12.1260511],[-9.9960242,12.1248028],[-9.9962179,12.1239421],[-9.9958526,12.1231559],[-9.9954234,12.1229147],[-9.9945249,12.1229671],[-9.9941145,12.1232189],[-9.9936746,12.1233762],[-9.9930416,12.1238587],[-9.9926232,12.1245615],[-9.9923979,12.1250021],[-9.9919044,12.1253273],[-9.9916147,12.1253063],[-9.9913255,12.1250121],[-9.9911319,12.124656],[-9.9909388,12.1241525],[-9.9906925,12.123617],[-9.9902623,12.1226005],[-9.989448,12.1209106],[-9.9892773,12.1204145],[-9.9892612,12.1193472],[-9.9887388,12.1186564],[-9.9883536,12.1176798],[-9.9879674,12.1169036],[-9.9877732,12.1159291],[-9.9873237,12.1158336],[-9.9867658,12.1158756],[-9.9864868,12.1162857],[-9.9858431,12.1173767],[-9.9854354,12.1181949],[-9.9848346,12.1184141],[-9.9841909,12.1183417],[-9.9832038,12.1185096],[-9.9824099,12.1187613],[-9.9816803,12.1188662],[-9.9809507,12.1187823],[-9.9807147,12.1182043],[-9.9809722,12.1173861],[-9.9812941,12.1162647],[-9.9814228,12.1145024],[-9.9814872,12.113915],[-9.9809293,12.1136842],[-9.9797062,12.1133905],[-9.9784831,12.1128964],[-9.9773029,12.1120363],[-9.9768094,12.1115327],[-9.9769811,12.1102855],[-9.9770884,12.1099708],[-9.9777321,12.10974],[-9.9784617,12.1092249],[-9.9782685,12.1081455],[-9.9778608,12.1070335],[-9.9777106,12.1064671],[-9.9770454,12.1064041],[-9.9762944,12.1066863],[-9.9744276,12.1072433],[-9.9731187,12.1074416],[-9.9720458,12.1073787],[-9.9714021,12.1068447],[-9.9706725,12.1059216],[-9.9700502,12.1047257],[-9.9691705,12.103749],[-9.9685697,12.1031521],[-9.9680815,12.1030814],[-9.9672608,12.1035298],[-9.9670457,12.1036172],[-9.966102,12.1040008],[-9.9643211,12.1045788],[-9.9630336,12.1045998],[-9.9609737,12.1046208],[-9.9597077,12.1046208],[-9.9585489,12.1053341],[-9.9565105,12.1077259],[-9.9556092,12.1088053],[-9.9554376,12.1090057],[-9.9553947,12.1098659],[-9.954987,12.11081],[-9.9544291,12.1109358],[-9.9539999,12.1107565],[-9.953442,12.1101061],[-9.9532274,12.1090476],[-9.9531201,12.1078098],[-9.952927,12.1070639],[-9.9509315,12.1060149],[-9.949923,12.1057002],[-9.9494938,12.1057118],[-9.9486355,12.1054904],[-9.947863,12.1051663],[-9.9469189,12.1049449],[-9.9454812,12.1049355],[-9.9445156,12.1047981],[-9.9434642,12.104411],[-9.9426059,12.1038655],[-9.9418978,12.1029213],[-9.9412111,12.101054],[-9.9404172,12.100518],[-9.939757,12.1000396],[-9.9389366,12.099343],[-9.936705,12.1006229],[-9.9355034,12.1012219],[-9.9344734,12.1026276],[-9.9330787,12.1027419],[-9.9321345,12.1027954],[-9.9314264,12.1026066],[-9.9309544,12.1018608],[-9.9308256,12.1010331],[-9.9303321,12.1007698],[-9.9294738,12.1010215],[-9.9291734,12.1017559],[-9.9279503,12.1028584],[-9.9272207,12.1031406],[-9.9262766,12.1030892],[-9.9254612,12.1027839],[-9.9243883,12.1024482],[-9.9235086,12.102166],[-9.9226503,12.1020286],[-9.9214057,12.102145],[-9.9193029,12.103278],[-9.9172858,12.1036976],[-9.9163632,12.1039588],[-9.9142388,12.1039074],[-9.913123,12.1031102],[-9.912651,12.1027535],[-9.9119858,12.1025112],[-9.9119858,12.1016205],[-9.9120287,12.099963],[-9.9124793,12.0985153],[-9.9128226,12.0976226],[-9.9127368,12.0961445],[-9.9122218,12.0953147],[-9.9111275,12.0950839],[-9.9100761,12.0951468],[-9.9090032,12.0949276],[-9.9078015,12.0947062],[-9.9065999,12.0935218],[-9.9056129,12.0922419],[-9.9057201,12.0911184],[-9.9060635,12.0903211],[-9.9062566,12.0896496],[-9.9062995,12.0885701],[-9.906557,12.0879082],[-9.9071364,12.0878567],[-9.9078874,12.0883488],[-9.9084882,12.0882344],[-9.9086813,12.0874675],[-9.908853,12.0867961],[-9.9091534,12.0859054],[-9.9087832,12.085393],[-9.9079947,12.0844157],[-9.9073509,12.0841524],[-9.9069218,12.0837443],[-9.9061922,12.0837327],[-9.905806,12.0841104],[-9.9044327,12.0838167],[-9.9034456,12.0833666],[-9.902523,12.0825787],[-9.9024371,12.0814362],[-9.9019436,12.0801143],[-9.9013857,12.0792425],[-9.9011497,12.0781514],[-9.9010853,12.0772911],[-9.900883,12.0770304],[-9.9007849,12.076904],[-9.8999695,12.0767151],[-9.8988779,12.0757473],[-9.8984889,12.0752253],[-9.8978666,12.0742391],[-9.8978237,12.0735047],[-9.89718,12.0729802],[-9.8963646,12.073127],[-9.895678,12.0736936],[-9.8951844,12.0741762],[-9.8947767,12.0747522],[-9.8946909,12.0751834],[-9.8943047,12.0752673],[-9.8930387,12.0743325],[-9.8920302,12.073787],[-9.8911504,12.0732204],[-9.8910002,12.0723297],[-9.8910646,12.0711756],[-9.8911718,12.0698327],[-9.891322,12.0685947],[-9.8909144,12.0680491],[-9.8901419,12.0678487],[-9.8892621,12.0678067],[-9.8884467,12.0670629],[-9.8874811,12.0662655],[-9.8872451,12.0653842],[-9.8869232,12.0648481],[-9.8850779,12.0637569],[-9.8838762,12.0633488],[-9.8831252,12.0632019],[-9.8814515,12.063034],[-9.8804859,12.0632533],[-9.8794989,12.0634956],[-9.8785977,12.0636006],[-9.8777179,12.0634421],[-9.8772458,12.0628126],[-9.8770527,12.0620572],[-9.8767308,12.0603155],[-9.8759584,12.059749],[-9.8750142,12.0594457],[-9.8721818,12.0580073],[-9.8715595,12.0574827],[-9.8712996,12.0575743],[-9.8709616,12.0578375],[-9.8707546,12.0580601],[-9.8705614,12.0585391],[-9.8705166,12.0589608],[-9.8705338,12.0593959],[-9.8704442,12.0596995],[-9.8701578,12.0598817],[-9.8697474,12.0599829],[-9.8695731,12.0599862],[-9.8692127,12.059993],[-9.8688609,12.0599559],[-9.8685297,12.059993],[-9.8680744,12.0598952],[-9.8677467,12.0597839],[-9.8673845,12.0597636],[-9.8669533,12.059848],[-9.8664463,12.0598817],[-9.8658426,12.059821],[-9.8651562,12.0598041],[-9.8645353,12.0599256],[-9.8640937,12.0601684],[-9.8636039,12.0602426],[-9.8633316,12.060389],[-9.8632764,12.0607264],[-9.8634109,12.0611784],[-9.8634799,12.061654],[-9.8634213,12.0620251],[-9.8631833,12.0623827],[-9.8627659,12.0626356],[-9.8623175,12.0627335],[-9.8620001,12.0626829],[-9.8617483,12.0624535],[-9.8615276,12.0619509],[-9.8615172,12.0613504],[-9.861431,12.0610097],[-9.8611205,12.0607803],[-9.8602133,12.0606488],[-9.8596131,12.060669],[-9.8592509,12.0609153],[-9.8589094,12.0612189],[-9.8584575,12.0614246],[-9.857816,12.0615731],[-9.8575434,12.0615225],[-9.8573744,12.0613167],[-9.8569881,12.0610806],[-9.8567052,12.0610097],[-9.8564983,12.06103],[-9.8563189,12.0611345],[-9.8557704,12.061536],[-9.8553186,12.0617856],[-9.8549874,12.0621499],[-9.8547115,12.0623321],[-9.8541837,12.0624366],[-9.8537698,12.06244],[-9.8534283,12.0623624],[-9.852966,12.0623152],[-9.8526211,12.0622309],[-9.8522727,12.0620285],[-9.851845,12.0615697],[-9.8514345,12.061229],[-9.8511171,12.0610502],[-9.8507549,12.0610198],[-9.8504135,12.0611278],[-9.850072,12.0613268],[-9.849765,12.0616338],[-9.8495235,12.0617923],[-9.8489923,12.0620285],[-9.8484162,12.0622882],[-9.848023,12.0623388],[-9.8475849,12.0622207],[-9.846964,12.0618598],[-9.846388,12.0615562],[-9.8458222,12.061202],[-9.8454118,12.0609962],[-9.8449012,12.060868],[-9.8445391,12.060922],[-9.8438768,12.0611278],[-9.8430799,12.0612121],[-9.8422831,12.061148],[-9.8419071,12.0610468],[-9.8415863,12.060804],[-9.8412897,12.0604599],[-9.8409413,12.0600281],[-9.8407723,12.0596705],[-9.8407309,12.0593534],[-9.8405446,12.0591477],[-9.8401031,12.058952],[-9.8396546,12.0589655],[-9.8392097,12.0590903],[-9.8387819,12.0590633],[-9.8384197,12.0587766],[-9.8382427,12.0586742],[-9.8379472,12.0585034],[-9.8375712,12.0583549],[-9.8370158,12.0583718],[-9.8365915,12.058419],[-9.8363708,12.0585303],[-9.8361155,12.0585236],[-9.8359009,12.0584314],[-9.8358327,12.0584022],[-9.835574,12.0581593],[-9.8352911,12.0580682],[-9.8348806,12.0581289],[-9.8343425,12.0582841],[-9.8337561,12.0584595],[-9.8333939,12.0585809],[-9.8327834,12.0585911],[-9.8321901,12.0584696],[-9.8316692,12.0583077],[-9.8308517,12.0581154],[-9.8301997,12.0578894],[-9.8298203,12.0577039],[-9.8295547,12.0574576],[-9.829258,12.0572046],[-9.8289648,12.0571776],[-9.8286095,12.0572957],[-9.8283094,12.0575824],[-9.8279679,12.0582875],[-9.827723,12.0589284],[-9.8273815,12.0594243],[-9.8270331,12.0597987],[-9.8265778,12.0599944],[-9.8258845,12.06019],[-9.825336,12.0603654],[-9.8248977,12.0606274],[-9.8244928,12.0613668],[-9.824166,12.0619536],[-9.8235806,12.0624163],[-9.8226,12.0631462],[-9.8220146,12.0638714],[-9.8212195,12.0646919],[-9.8207365,12.0652309],[-9.8207545,12.0657818],[-9.8206814,12.0660847],[-9.8204521,12.0662397],[-9.8198411,12.0662857],[-9.8193719,12.0661508],[-9.8187855,12.0660968],[-9.8184268,12.0662115],[-9.8180611,12.0664341],[-9.8175679,12.0665455],[-9.8169815,12.066505],[-9.8165261,12.0663566],[-9.8160536,12.0659821],[-9.8159121,12.0655807],[-9.8156914,12.0654154],[-9.8152408,12.0652671],[-9.814792,12.0650524],[-9.814135,12.0645358],[-9.8136348,12.0643571],[-9.8128693,12.0640437],[-9.8119449,12.063929],[-9.8112481,12.0639425],[-9.8105998,12.0636473],[-9.8100778,12.0632132],[-9.8093022,12.0627266],[-9.8087412,12.0622639],[-9.8080192,12.0616294],[-9.8070777,12.0608756],[-9.8065855,12.0603537],[-9.8057464,12.0599005],[-9.8048049,12.0595332],[-9.8041659,12.0591849],[-9.8040049,12.0587317],[-9.8040195,12.0583215],[-9.8041756,12.0580066],[-9.8020691,12.056878],[-9.8002581,12.056782],[-9.7990601,12.056809],[-9.7979591,12.056031],[-9.7974951,12.055948],[-9.7959191,12.055923],[-9.7950871,12.055735],[-9.7932071,12.0549],[-9.7919691,12.054519],[-9.7915431,12.054286],[-9.7913021,12.053829],[-9.7911951,12.052756],[-9.7910071,12.05187],[-9.7907111,12.05128],[-9.7904431,12.050528],[-9.7903891,12.049535],[-9.7908461,12.045427],[-9.7906311,12.044595],[-9.7901581,12.043895],[-9.7884431,12.043252],[-9.7870141,12.042585],[-9.7859661,12.041537],[-9.7846321,12.040394],[-9.7834891,12.039536],[-9.7822971,12.03894],[-9.7806781,12.038226],[-9.7797051,12.037937],[-9.7773901,12.037821],[-9.7760561,12.038298],[-9.7749131,12.038584],[-9.7726741,12.03894],[-9.7680531,12.038941],[-9.7666231,12.038583],[-9.7613831,12.036392],[-9.7580481,12.035058],[-9.7557611,12.034582],[-9.7528081,12.0342],[-9.7508071,12.033438],[-9.7478531,12.032104],[-9.7459941,12.03108],[-9.7447081,12.030508],[-9.7442501,12.030444],[-9.7438031,12.030508],[-9.7412549,12.0310245],[-9.739527,12.0311077],[-9.7381333,12.0312462],[-9.7374931,12.0315011],[-9.7370172,12.0316063],[-9.7364507,12.0314844],[-9.7360088,12.0311797],[-9.7352893,12.030958],[-9.7342978,12.0305037],[-9.7333007,12.030343],[-9.7323338,12.030549],[-9.7318972,12.030886],[-9.7314886,12.0309879],[-9.7308917,12.0309722],[-9.7302547,12.0310545],[-9.7293133,12.0310701],[-9.7285882,12.0308821],[-9.7277258,12.0309353],[-9.7268886,12.0311351],[-9.7259431,12.0312566],[-9.7250178,12.0312448],[-9.7242246,12.0312605],[-9.7236517,12.0310803],[-9.723163,12.0308883],[-9.7225541,12.0308844],[-9.7221134,12.0308413],[-9.7217168,12.030951],[-9.7214124,12.030998],[-9.7211199,12.0309549],[-9.7207714,12.0307551],[-9.7202266,12.0307355],[-9.7195696,12.0306179],[-9.7190248,12.0305631],[-9.7186682,12.030614],[-9.7183638,12.0305592],[-9.7179472,12.0302927],[-9.7174384,12.0302301],[-9.7169857,12.029995],[-9.7167253,12.0296815],[-9.716497,12.0292231],[-9.7159922,12.0287138],[-9.7152952,12.0283063],[-9.714534,12.0280555],[-9.7133843,12.027891],[-9.7129717,12.0279458],[-9.7126873,12.0282005],[-9.7126272,12.0285766],[-9.7126031,12.0289724],[-9.7124189,12.0292545],[-9.7120864,12.0293563],[-9.7117756,12.0296709],[-9.7115472,12.0299961],[-9.7113349,12.0303605],[-9.7110545,12.0304427],[-9.710702,12.0303448],[-9.7105417,12.0300862],[-9.7105377,12.0296395],[-9.7104115,12.0294079],[-9.7100886,12.0290699],[-9.7096778,12.0289341],[-9.7093322,12.0289979],[-9.7089753,12.0292694],[-9.7085589,12.029358],[-9.7081652,12.0293082],[-9.7076128,12.0293192],[-9.7071794,12.0294134],[-9.7069443,12.0295797],[-9.7068112,12.0298456],[-9.7064542,12.0302418],[-9.7062361,12.0305216],[-9.7059189,12.0306269],[-9.7056413,12.0305687],[-9.7054571,12.0304219],[-9.705273,12.030131],[-9.7049643,12.0299952],[-9.7045252,12.0300146],[-9.7042306,12.0301725],[-9.7040238,12.0304579],[-9.7040097,12.0307931],[-9.7041258,12.0309732],[-9.7041824,12.0311145],[-9.7040663,12.0312115],[-9.703834,12.0312142],[-9.7035224,12.0310896],[-9.7031202,12.0308707],[-9.7026641,12.0308291],[-9.7021203,12.0305826],[-9.7015962,12.0303554],[-9.7011713,12.0302889],[-9.7006558,12.0303748],[-9.7003442,12.0304967],[-9.6999221,12.030613],[-9.6995142,12.0306685],[-9.6987295,12.0307349],[-9.6982876,12.0307987],[-9.6978939,12.0310369],[-9.6976333,12.0311284],[-9.6974265,12.031314],[-9.6968798,12.031591],[-9.6964832,12.0317462],[-9.6961518,12.0317683],[-9.6958459,12.0318736],[-9.6955003,12.0319096],[-9.6952595,12.0318598],[-9.6950669,12.0316769],[-9.6947581,12.0315356],[-9.6942709,12.0315245],[-9.6939423,12.0315799],[-9.6935429,12.0317766],[-9.6931463,12.0320287],[-9.6927148,12.032382],[-9.6927279,12.0327606],[-9.6928271,12.0332223],[-9.6928221,12.0335228],[-9.6927062,12.033705],[-9.6924796,12.0337543],[-9.6921775,12.033705],[-9.6917394,12.0338922],[-9.6908632,12.0341138],[-9.6903798,12.0342396],[-9.6900877,12.0343157],[-9.6892769,12.0344487],[-9.6887734,12.0345915],[-9.6884863,12.0347442],[-9.6883705,12.0349461],[-9.6883957,12.0351185],[-9.6887381,12.0353746],[-9.68901,12.0356996],[-9.6892014,12.0362512],[-9.6893625,12.0366797],[-9.6897654,12.0370442],[-9.6901612,12.0375446],[-9.6902966,12.0378615],[-9.6902503,12.038356],[-9.6901438,12.0389019],[-9.6901185,12.0390316],[-9.6897411,12.0396271],[-9.6895025,12.0400694],[-9.6895666,12.0402818],[-9.6897838,12.0404211],[-9.6903215,12.0405918],[-9.6906669,12.0408251],[-9.6908271,12.0411768],[-9.6908022,12.0415355],[-9.6907523,12.0422807],[-9.6907523,12.0426708],[-9.6909945,12.043127],[-9.6913292,12.0435205],[-9.6917885,12.044217],[-9.6922443,12.0446488],[-9.6926182,12.045098],[-9.6927749,12.0454288],[-9.6928425,12.0457771],[-9.6928176,12.0461114],[-9.6927036,12.0462716],[-9.6924152,12.0466964],[-9.6923511,12.046982],[-9.6924081,12.047372],[-9.6927321,12.04787],[-9.6929992,12.0484829],[-9.6930384,12.048852],[-9.6929671,12.0491863],[-9.6930277,12.0496007],[-9.6930312,12.0500952],[-9.6930775,12.0505583],[-9.6930348,12.0509484],[-9.693049,12.0512409],[-9.6931772,12.0513662],[-9.6933731,12.0513836],[-9.6936864,12.051314],[-9.6940425,12.0511364],[-9.6944057,12.0510911],[-9.6946585,12.0512896],[-9.6949861,12.0516274],[-9.6951748,12.0518955],[-9.6952069,12.0521706],[-9.6949897,12.052592],[-9.6949125,12.0533738],[-9.6949679,12.0536693],[-9.6949612,12.0544361],[-9.6951861,12.0552251],[-9.6955421,12.0558693],[-9.6956347,12.0561096],[-9.6955599,12.0562941],[-9.6953498,12.0563951],[-9.6950507,12.0567956],[-9.6947659,12.0572831],[-9.6946484,12.0575616],[-9.694627,12.0579934],[-9.694716,12.0582755],[-9.6950543,12.0585471],[-9.6954958,12.0587317],[-9.6961332,12.0588605],[-9.6967777,12.0591983],[-9.6970092,12.0594177],[-9.6970661,12.0596684],[-9.696938,12.0601559],[-9.696621,12.0605006],[-9.6963291,12.0606121],[-9.6958128,12.0606747],[-9.695446,12.0607653],[-9.6951576,12.0609359],[-9.6950365,12.061204],[-9.6949795,12.0616428],[-9.6950614,12.0622417],[-9.6949938,12.0626735],[-9.6947944,12.0630357],[-9.6945594,12.0633386],[-9.6943315,12.0634117],[-9.694043,12.0634048],[-9.6937582,12.0634465],[-9.6934804,12.0635998],[-9.6933451,12.0639201],[-9.6932561,12.0644807],[-9.6933309,12.065111],[-9.6934911,12.065501],[-9.6937902,12.0659885],[-9.6938579,12.0665004],[-9.6937867,12.0667197],[-9.6934555,12.0668695],[-9.6928929,12.0668312],[-9.6922448,12.0669356],[-9.6915541,12.0670819],[-9.6911054,12.0673605],[-9.6907636,12.0675206],[-9.6903648,12.0675938],[-9.689998,12.067545],[-9.6893855,12.0672386],[-9.6889689,12.0672003],[-9.688385,12.0672873],[-9.6875019,12.0673744],[-9.6871636,12.0674963],[-9.6870069,12.0676982],[-9.6869678,12.0679942],[-9.6870069,12.0686384],[-9.6869464,12.0690284],[-9.686747,12.0696691],[-9.6865654,12.0699163],[-9.6864443,12.0700277],[-9.686163,12.0701078],[-9.685928,12.0700312],[-9.6856788,12.0698014],[-9.68528,12.0696482],[-9.6848705,12.0696064],[-9.6845429,12.0696482],[-9.6843114,12.0699163],[-9.6842972,12.0701252],[-9.6846319,12.0703376],[-9.6851268,12.0705048],[-9.685255,12.0707102],[-9.6851802,12.0709261],[-9.6849595,12.0711107],[-9.6841868,12.0713892],[-9.683788,12.0714171],[-9.6836705,12.0712848],[-9.6836812,12.0708704],[-9.6835714,12.0707338],[-9.6832304,12.0707066],[-9.6828129,12.0707679],[-9.682458,12.0709584],[-9.6821517,12.0713599],[-9.6818664,12.0716049],[-9.6811426,12.0719044],[-9.6808295,12.0721153],[-9.6806555,12.0725713],[-9.680231,12.0734152],[-9.680179,12.0741486],[-9.6799146,12.0751314],[-9.679982,12.0756675],[-9.6798185,12.0759073],[-9.6794674,12.0760343],[-9.6789288,12.0762083],[-9.678472,12.0765845],[-9.678145,12.0769654],[-9.6779286,12.077271],[-9.6776256,12.0775297],[-9.6775535,12.07792],[-9.6775391,12.0784701],[-9.677414,12.079025],[-9.6769476,12.0798291],[-9.6765773,12.0809342],[-9.6762887,12.0820345],[-9.6761493,12.0827211],[-9.6760291,12.0829562],[-9.6758079,12.0835722],[-9.6753222,12.0842352],[-9.6750673,12.0846679],[-9.674721,12.0850911],[-9.6747114,12.0856318],[-9.6748028,12.0862525],[-9.6750144,12.0869485],[-9.6750817,12.0877525],[-9.6750192,12.0883074],[-9.6748268,12.0890927],[-9.6748894,12.0895347],[-9.6750913,12.0903764],[-9.6751394,12.0911429],[-9.6753414,12.0916601],[-9.6757069,12.092088],[-9.6761301,12.092182],[-9.6765725,12.0922996],[-9.6771976,12.0927557],[-9.6777603,12.0932682],[-9.6779574,12.0936491],[-9.6779959,12.0947635],[-9.6780728,12.0953137],[-9.6780247,12.0959061],[-9.6782315,12.0966444],[-9.6782652,12.0974061],[-9.6781402,12.0980315],[-9.6782604,12.0986238],[-9.6785441,12.0991693],[-9.6789144,12.1000204],[-9.6788567,12.1010831],[-9.6789529,12.1018307],[-9.6792702,12.1022727],[-9.6796886,12.1024467],[-9.680309,12.1026113],[-9.6809005,12.1028134],[-9.6810447,12.1030203],[-9.6809822,12.1037209],[-9.6809582,12.1043181],[-9.6809966,12.1047742],[-9.6807321,12.1053102],[-9.6802561,12.1059544],[-9.6800397,12.1065656],[-9.6798185,12.1073884],[-9.6795444,12.1077693],[-9.6791404,12.1082019],[-9.6788903,12.1088319],[-9.678823,12.1093302],[-9.6790635,12.1100214],[-9.6791596,12.1107738],[-9.6792222,12.1121701],[-9.6792623,12.1125846],[-9.6794122,12.1132275],[-9.6796976,12.1135594],[-9.6801946,12.1137903],[-9.6804161,12.1139972],[-9.680293,12.1143918],[-9.6800962,12.1148008],[-9.6801257,12.1151568],[-9.6804456,12.1155802],[-9.6808048,12.1156572],[-9.6813018,12.1157535],[-9.6816857,12.1161671],[-9.6822368,12.1167926],[-9.6824829,12.1174277],[-9.6825665,12.1177934],[-9.6829454,12.1181158],[-9.6831177,12.1184334],[-9.6830209,12.1186896],[-9.6828389,12.1188911],[-9.6824921,12.1189481],[-9.6822723,12.1190287],[-9.6821487,12.1192436],[-9.6820731,12.1196934],[-9.681922,12.1201165],[-9.6815615,12.1208316],[-9.6811185,12.1214862],[-9.6807202,12.1219932],[-9.6802944,12.1223591],[-9.6800712,12.1226847],[-9.6799201,12.123289],[-9.6798686,12.1239269],[-9.6798721,12.1243734],[-9.6797313,12.124642],[-9.6795149,12.1247864],[-9.6793021,12.1247964],[-9.6790857,12.1247293],[-9.6788282,12.124454],[-9.6784711,12.1242794],[-9.6781861,12.1242861],[-9.6779835,12.1243902],[-9.6779423,12.1245984],[-9.67798,12.1248367],[-9.6780968,12.1250583],[-9.67832,12.1252799],[-9.6783921,12.1255014],[-9.6783681,12.125817],[-9.6781586,12.1264582],[-9.6778427,12.1270424],[-9.6776298,12.1277877],[-9.6773791,12.1284524],[-9.6770323,12.1292111],[-9.6767851,12.1297248],[-9.6765859,12.1300235],[-9.676555,12.1304633],[-9.6764863,12.1308058],[-9.6764795,12.1311549],[-9.676373,12.1314403],[-9.6763833,12.1317525],[-9.676349,12.132058],[-9.6761258,12.1323366],[-9.6758717,12.1325179],[-9.6757824,12.1328335],[-9.6757446,12.1332262],[-9.6756244,12.1337029],[-9.6753703,12.1341696],[-9.6748724,12.1347839],[-9.6745428,12.1351398],[-9.6741239,12.135405],[-9.6737324,12.1355225],[-9.6732551,12.1357776],[-9.6726508,12.1360697],[-9.6720533,12.136345],[-9.6717305,12.1364155],[-9.6713768,12.1366068],[-9.6709751,12.1369358],[-9.6706454,12.137342],[-9.6701613,12.1378691],[-9.6699724,12.1382685],[-9.6699484,12.1385371],[-9.6700102,12.1388057],[-9.6701681,12.1390608],[-9.6704291,12.1393361],[-9.6705527,12.139608],[-9.6705733,12.1399504],[-9.6705184,12.1402559],[-9.6704051,12.1406117],[-9.6704154,12.1411354],[-9.670357,12.1415383],[-9.6701269,12.142109],[-9.6698969,12.1426897],[-9.6696359,12.1431765],[-9.6697183,12.1434215],[-9.6697114,12.1436297],[-9.6695535,12.1437908],[-9.6693166,12.1439049],[-9.6692067,12.1440829],[-9.6690316,12.1443178],[-9.6687809,12.1444051],[-9.6684478,12.1443984],[-9.6681765,12.1444353],[-9.667867,12.1446873],[-9.6676339,12.1449721],[-9.667328,12.1452522],[-9.6668472,12.1454754],[-9.6663616,12.1455276],[-9.66591,12.1455133],[-9.6656429,12.1456225],[-9.6653855,12.1459074],[-9.6650162,12.1461733],[-9.6645972,12.1463881],[-9.664168,12.1465123],[-9.6638075,12.1466902],[-9.6635019,12.1468144],[-9.6631413,12.1468581],[-9.6626571,12.14713],[-9.6623378,12.1470293],[-9.6619567,12.1470024],[-9.6615892,12.147083],[-9.6613008,12.147281],[-9.6607754,12.147412],[-9.6605316,12.14761],[-9.660432,12.1480699],[-9.6603771,12.1486205],[-9.6602638,12.1490938],[-9.6600509,12.1495738],[-9.6599238,12.1499766],[-9.6598895,12.150413],[-9.6597728,12.1509703],[-9.6594774,12.1515174],[-9.6589933,12.1520042],[-9.6586121,12.1525144],[-9.6582722,12.1531354],[-9.6581657,12.1535584],[-9.6581692,12.1541391],[-9.6582997,12.1547769],[-9.6583683,12.1552939],[-9.6583237,12.1558075],[-9.6581932,12.1561834],[-9.6580043,12.1564083],[-9.6576129,12.1564923],[-9.6570154,12.1565393],[-9.6564385,12.1566165],[-9.6559784,12.1565628],[-9.6555389,12.1566836],[-9.6549277,12.1570428],[-9.6544195,12.1575463],[-9.6540279,12.1581371],[-9.6535404,12.1585701],[-9.6532211,12.1590132],[-9.6529325,12.1593153],[-9.6525652,12.1595805],[-9.6519487,12.1598436],[-9.6515456,12.1601616],[-9.6514582,12.160437],[-9.6514582,12.1607598],[-9.6516379,12.1610636],[-9.6515892,12.1614386],[-9.6511911,12.1617899],[-9.6506715,12.1621175],[-9.650215,12.1626396],[-9.6499528,12.1631523],[-9.6496517,12.1635131],[-9.6491564,12.1638644],[-9.6488699,12.1642726],[-9.6488553,12.1646714],[-9.6490884,12.1650132],[-9.6490884,12.1656635],[-9.6489913,12.1662759],[-9.6488285,12.1666986],[-9.6484645,12.1669738],[-9.6479083,12.1672524],[-9.6475271,12.1675579],[-9.6473279,12.16786],[-9.6470601,12.1681319],[-9.6467339,12.16834],[-9.6462772,12.1684541],[-9.6458171,12.1686052],[-9.6455218,12.1685951],[-9.645199,12.1684675],[-9.6449758,12.1682494],[-9.6448899,12.1679506],[-9.6446976,12.1677459],[-9.6443165,12.1676619],[-9.643901,12.1676552],[-9.6436057,12.1677324],[-9.6432452,12.1676519],[-9.6423352,12.167578],[-9.6413909,12.1674505],[-9.640917,12.167239],[-9.6403917,12.1671148],[-9.6397804,12.1671014],[-9.6395953,12.1671371],[-9.6392413,12.1672054],[-9.6389495,12.1673968],[-9.6386679,12.1678298],[-9.6385924,12.1681822],[-9.6388052,12.1686052],[-9.6390387,12.1688838],[-9.639049,12.1691422],[-9.6389357,12.1697296],[-9.6386748,12.1705319],[-9.6385099,12.1709716],[-9.6382112,12.1714717],[-9.6380704,12.1719551],[-9.6379777,12.1725593],[-9.6378644,12.172999],[-9.6377373,12.1732944],[-9.6375313,12.173526],[-9.6372154,12.1737307],[-9.6370025,12.1739455],[-9.6366523,12.1742308],[-9.6362814,12.1744457],[-9.6361647,12.1746706],[-9.6359483,12.1749189],[-9.6356255,12.1750767],[-9.6353989,12.1752982],[-9.6350143,12.1754996],[-9.6346744,12.1755835],[-9.6344203,12.1755533],[-9.6341868,12.175362],[-9.6339258,12.1752412],[-9.6335893,12.1751707],[-9.6330777,12.1752143],[-9.6327721,12.1752949],[-9.6324905,12.1754761],[-9.6320365,12.1757889],[-9.6314771,12.176102],[-9.6306745,12.1763941],[-9.6302703,12.1768054],[-9.6298053,12.1772274],[-9.6291743,12.1776278],[-9.6284824,12.1777955],[-9.6280729,12.1775953],[-9.6276411,12.1774601],[-9.627381,12.1775791],[-9.6273201,12.177855],[-9.6270986,12.1781526],[-9.6266447,12.1784286],[-9.6259639,12.1786017],[-9.6251945,12.1785638],[-9.624165,12.1783258],[-9.6230856,12.1781364],[-9.6217681,12.1776981],[-9.6200025,12.1772328],[-9.6189507,12.1771084],[-9.6179711,12.1771517],[-9.6172458,12.1773464],[-9.6166813,12.1776061],[-9.6162883,12.1779633],[-9.6162773,12.1782717],[-9.6164598,12.1785747],[-9.6168584,12.1788723],[-9.6170355,12.1793484],[-9.6171683,12.1800139],[-9.6171462,12.1804846],[-9.6169303,12.1807443],[-9.6165318,12.1808255],[-9.6159174,12.1807498],[-9.6151756,12.180463],[-9.6146444,12.1804468],[-9.6143122,12.1806902],[-9.6141683,12.1809554],[-9.6141738,12.1814098],[-9.614052,12.1818589],[-9.6137808,12.1821782],[-9.6133767,12.182281],[-9.6128177,12.1821997],[-9.6119044,12.181967],[-9.611528,12.1819454],[-9.6111627,12.1820644],[-9.6109191,12.1823946],[-9.6105538,12.1824974],[-9.6102383,12.1824],[-9.6099614,12.1821024],[-9.6095132,12.1819293],[-9.6091368,12.181886],[-9.6085887,12.182005],[-9.6077751,12.1820428],[-9.6071163,12.1820213],[-9.6064465,12.1819022],[-9.6059319,12.1818913],[-9.6054669,12.1819887],[-9.6049078,12.1824108],[-9.6044372,12.1826813],[-9.6039115,12.1830762],[-9.6034078,12.1836985],[-9.6029816,12.184429],[-9.6023947,12.1850836],[-9.6015867,12.1857978],[-9.601105,12.1860143],[-9.6008062,12.1861982],[-9.6006014,12.1865012],[-9.6005293,12.186815],[-9.6003689,12.1871721],[-9.5997933,12.1878863],[-9.5992562,12.1882542],[-9.5988411,12.1882217],[-9.5984315,12.1880107],[-9.5979057,12.1878376],[-9.5975459,12.1879188],[-9.5971695,12.1881839],[-9.5966104,12.188357],[-9.595592,12.1885301],[-9.5951713,12.188752],[-9.5950273,12.1891415],[-9.5949167,12.1896393],[-9.5946897,12.1899477],[-9.5942358,12.1901316],[-9.5937099,12.190229],[-9.5929959,12.190202],[-9.5921988,12.1898882],[-9.5916952,12.1895094],[-9.5913465,12.1893201],[-9.5911195,12.1893147],[-9.5908538,12.1894824],[-9.5906822,12.1898178],[-9.5905382,12.1903859],[-9.5902836,12.1908837],[-9.5898409,12.1912787],[-9.5891267,12.1915816],[-9.5885235,12.1919279],[-9.5880529,12.1919387],[-9.5873555,12.1917656],[-9.5866414,12.191652],[-9.5862208,12.1917169],[-9.5858389,12.1919387],[-9.5854956,12.1923607],[-9.5851026,12.192615],[-9.584621,12.19268],[-9.5840233,12.1926367],[-9.5832539,12.1921497],[-9.5830214,12.1917331],[-9.5827557,12.1916087],[-9.5824734,12.1917331],[-9.582252,12.1920361],[-9.5818478,12.1923066],[-9.581322,12.1924581],[-9.5808294,12.1924798],[-9.5802649,12.1923553],[-9.5798331,12.1923661],[-9.5794014,12.1926421],[-9.5790525,12.1930966],[-9.578632,12.1935781],[-9.5782888,12.1942219],[-9.5781891,12.19479],[-9.5783441,12.1953256],[-9.5784659,12.1957855],[-9.5783663,12.1962508],[-9.5780784,12.1965971],[-9.577702,12.1967377],[-9.5773367,12.1970623],[-9.5766725,12.1973004],[-9.5761964,12.1976845],[-9.5756983,12.1978577],[-9.5751226,12.1978577],[-9.5745414,12.1977116],[-9.5740045,12.1978306],[-9.572903,12.197836],[-9.5719232,12.1977278],[-9.5703013,12.197084],[-9.5695928,12.1965429],[-9.5687237,12.1962129],[-9.5681094,12.1961372],[-9.5674729,12.196267],[-9.5668972,12.1962778],[-9.5664488,12.1960668],[-9.5662052,12.1955961],[-9.5656572,12.1950172],[-9.5652033,12.1949198],[-9.5649653,12.1950767],[-9.5648768,12.1953797],[-9.5647052,12.1956665],[-9.5643011,12.1959532],[-9.56372,12.196029],[-9.5632328,12.1960127],[-9.5627568,12.1958396],[-9.5622032,12.195515],[-9.5614615,12.1948982],[-9.560659,12.1946006],[-9.5601552,12.1941894],[-9.5595241,12.1935077],[-9.5590537,12.1931723],[-9.5586165,12.192707],[-9.5582622,12.192707],[-9.5581238,12.1928964],[-9.5581958,12.1931777],[-9.5580574,12.1934212],[-9.5574707,12.1937566],[-9.5567123,12.1940001],[-9.555976,12.1944437],[-9.5549354,12.1948928],[-9.554083,12.195093],[-9.5533689,12.1953635],[-9.5525774,12.1954447],[-9.5521568,12.1957152],[-9.5518579,12.1961372],[-9.5514649,12.1965267],[-9.5509003,12.1966295],[-9.5504243,12.1965971],[-9.5499372,12.1968567],[-9.549522,12.197295],[-9.5490626,12.1975871],[-9.5484427,12.197625],[-9.5478338,12.197506],[-9.5474851,12.1971543],[-9.5473079,12.1966403],[-9.5465219,12.1962292],[-9.5458189,12.1962346],[-9.5450494,12.1958288],[-9.5442025,12.1953851],[-9.5429572,12.1955204],[-9.5423428,12.1958775],[-9.5410585,12.1960885],[-9.5399516,12.1959099],[-9.5390549,12.1955637],[-9.5384348,12.1956773],[-9.5379422,12.1961642],[-9.537743,12.1970245],[-9.5371563,12.1977008],[-9.5366359,12.198377],[-9.5359219,12.1986043],[-9.5350805,12.1980957],[-9.5345713,12.1976737],[-9.5339956,12.1974519],[-9.5336691,12.197625],[-9.5334421,12.1981823],[-9.5327447,12.199194],[-9.5325454,12.1997945],[-9.5326118,12.20046],[-9.533027,12.2013851],[-9.5331487,12.2022886],[-9.5328554,12.2034031],[-9.5325786,12.204166],[-9.5323074,12.204404],[-9.5320251,12.204469],[-9.5315601,12.2043445],[-9.5310564,12.2040091],[-9.5304697,12.2038468],[-9.5301209,12.2040307],[-9.5298608,12.2045231],[-9.5294069,12.2057079],[-9.5286762,12.2069684],[-9.5281338,12.2076501],[-9.5280452,12.2081424],[-9.5281172,12.2086131],[-9.5285047,12.2095004],[-9.5287205,12.2102902],[-9.5287205,12.2107447],[-9.5285489,12.2113019],[-9.5281504,12.2119403],[-9.5275304,12.2126273],[-9.5266946,12.2134064],[-9.525892,12.2137797],[-9.5249898,12.2144992],[-9.5243698,12.2149807],[-9.5236447,12.2152349],[-9.5231244,12.2155541],[-9.5225985,12.2158192],[-9.5221502,12.2158787],[-9.5215468,12.2157327],[-9.5209767,12.2157922],[-9.5205173,12.2160789],[-9.5201962,12.216555],[-9.5198641,12.2166956],[-9.5192829,12.2169174],[-9.5190061,12.2172258],[-9.5186685,12.2181076],[-9.5187958,12.2189029],[-9.5188013,12.2195683],[-9.5182921,12.2203689],[-9.5179102,12.2207206],[-9.5174009,12.2204988],[-9.5168142,12.2203852],[-9.5161333,12.2204393],[-9.5158732,12.2206502],[-9.5155909,12.221294],[-9.5152477,12.2220297],[-9.5150152,12.222495],[-9.5146886,12.2228304],[-9.514351,12.2229278],[-9.5140576,12.222917],[-9.5136812,12.2226356],[-9.5131886,12.2221758],[-9.5125133,12.2217647],[-9.5119874,12.2214293],[-9.5115723,12.2212886],[-9.5112679,12.2213427],[-9.5111848,12.2215699],[-9.5112623,12.2219378],[-9.5111239,12.2223652],[-9.5106147,12.2228629],[-9.5100833,12.2231929],[-9.5096128,12.2233443],[-9.5089873,12.2233497],[-9.5084615,12.2232361],[-9.5080906,12.2234092],[-9.507836,12.2237879],[-9.5072825,12.2242099],[-9.5066681,12.2245345],[-9.505882,12.2246751],[-9.5052067,12.224621],[-9.5046034,12.2243127],[-9.5029982,12.2239989],[-9.5025941,12.2240368],[-9.5024225,12.2242369],[-9.5022343,12.2247671],[-9.5020959,12.225281],[-9.5018856,12.2256976],[-9.5015037,12.2260276],[-9.5009114,12.2263197],[-9.5003855,12.2268174],[-9.4996881,12.2275585],[-9.4988744,12.2282077],[-9.4979887,12.2287703],[-9.4972913,12.2293491],[-9.4970588,12.2298197],[-9.4965993,12.230404],[-9.4960348,12.2307935],[-9.4953485,12.2314589],[-9.4949997,12.2319349],[-9.4944627,12.2324488],[-9.4941307,12.2329681],[-9.4936767,12.2334117],[-9.492935,12.2339202],[-9.4927136,12.2343638],[-9.4927746,12.2349048],[-9.4930291,12.2357541],[-9.4933668,12.2361111],[-9.493948,12.2363166],[-9.4946066,12.2368089],[-9.4954425,12.2370902],[-9.4957081,12.2373823],[-9.4956749,12.2377772],[-9.4953207,12.2382911],[-9.4950605,12.2389456],[-9.4947173,12.2394595],[-9.4943964,12.2398977],[-9.4942691,12.2403196],[-9.4942968,12.2407578],[-9.4945181,12.2410986],[-9.4945679,12.2414664],[-9.4944738,12.2422724],[-9.4943133,12.2426727],[-9.4939092,12.2428891],[-9.4931509,12.2430027],[-9.4917339,12.2431217],[-9.4914959,12.2432461],[-9.491352,12.2436735],[-9.4913537,12.2437376],[-9.4913631,12.24409],[-9.4917284,12.244355],[-9.4923096,12.2444037],[-9.4935881,12.2446417],[-9.4942856,12.244804],[-9.4946621,12.2450204],[-9.494806,12.2452584],[-9.4948004,12.2455559],[-9.4945513,12.2457398],[-9.4941472,12.2459021],[-9.4936713,12.2463673],[-9.492946,12.2466811],[-9.4921934,12.2471517],[-9.4915346,12.2478116],[-9.4909202,12.2485094],[-9.4903778,12.2490665],[-9.4902006,12.2494668],[-9.4898906,12.2497752],[-9.4898242,12.250262],[-9.4897246,12.2506406],[-9.4892652,12.251003],[-9.4887226,12.2510734],[-9.4881637,12.2509976],[-9.4878868,12.25083],[-9.4877374,12.2505324],[-9.4874552,12.2504351],[-9.4870898,12.2505216],[-9.4868674,12.2507222],[-9.4867301,12.2508462],[-9.4864367,12.2514358],[-9.4863426,12.25202],[-9.4864809,12.2527394],[-9.4864754,12.2534859],[-9.4865916,12.2543351],[-9.4863979,12.2548814],[-9.4859607,12.2554927],[-9.4854402,12.2560119],[-9.484992,12.2561363],[-9.4847318,12.2563311],[-9.4847318,12.2566448],[-9.484621,12.2568666],[-9.4843332,12.2570288],[-9.4839569,12.2570018],[-9.4833093,12.2570613],[-9.4824955,12.2570288],[-9.4818037,12.2567854],[-9.4809733,12.2566718],[-9.4802483,12.2565582],[-9.4797169,12.2563257],[-9.4793293,12.2564447],[-9.4789308,12.2564068],[-9.4786208,12.2562283],[-9.4781392,12.2561201],[-9.4774031,12.2561363],[-9.4768994,12.2562932],[-9.4763127,12.2561472],[-9.475892,12.2561093],[-9.475654,12.256304],[-9.4756374,12.2566772],[-9.4754769,12.2571749],[-9.4752167,12.2577212],[-9.4752111,12.2581052],[-9.4750118,12.2586353],[-9.4745247,12.2592357],[-9.4741429,12.2594196],[-9.4738715,12.259728],[-9.4735173,12.2599335],[-9.4731797,12.2599822],[-9.4728144,12.2598199],[-9.4725597,12.2594845],[-9.4720228,12.2591167],[-9.4712478,12.2583865],[-9.4708383,12.2581864],[-9.4701243,12.2580944],[-9.4697202,12.2581431],[-9.4695209,12.2583649],[-9.4690836,12.2587165],[-9.4684636,12.2589653],[-9.4677607,12.2590248],[-9.4672735,12.2591925],[-9.4663768,12.2597009],[-9.4657957,12.2599876],[-9.4652699,12.260139],[-9.4647771,12.2604257],[-9.4641074,12.2604095],[-9.4632716,12.2602905],[-9.4623748,12.2600795],[-9.4618325,12.2600687],[-9.4613232,12.260231],[-9.461218,12.2604041],[-9.4609911,12.2605231],[-9.4607642,12.2604906],[-9.4605426,12.2602689],[-9.4600335,12.2599984],[-9.4594468,12.2595008],[-9.4589208,12.2591167],[-9.4584781,12.2589869],[-9.4580463,12.2587056],[-9.4577031,12.258327],[-9.4574485,12.2580674],[-9.4571883,12.2578997],[-9.4562251,12.2576401],[-9.4558709,12.2576184],[-9.4556218,12.2574562],[-9.4554669,12.2570883],[-9.455323,12.2568557],[-9.455096,12.2567692],[-9.4547086,12.2568287],[-9.4541329,12.2570829],[-9.4539115,12.2574021],[-9.4539226,12.2577537],[-9.4541108,12.2582459],[-9.4542602,12.2588246],[-9.4540775,12.2592628],[-9.4538284,12.2594467],[-9.4535073,12.2594845],[-9.4528763,12.2594088],[-9.4509778,12.2593764],[-9.450153,12.2594088],[-9.4493503,12.2595873],[-9.448354,12.2595819],[-9.4474241,12.2597063],[-9.4467598,12.25949],[-9.4465109,12.2591762],[-9.4454867,12.2591762],[-9.4449443,12.2593223],[-9.4443797,12.2592898],[-9.4437321,12.259279],[-9.4435217,12.2591113],[-9.4434775,12.2587543],[-9.4435217,12.2581107],[-9.4432782,12.2578132],[-9.4431399,12.2571478],[-9.4431842,12.2561039],[-9.4429904,12.2556333],[-9.4425587,12.2555143],[-9.4419664,12.2555846],[-9.4413242,12.2559254],[-9.4403114,12.2559308],[-9.4393205,12.2560606],[-9.438468,12.2560173],[-9.437527,12.2557739],[-9.4366027,12.2556928],[-9.4362319,12.2558497],[-9.435706,12.2565312],[-9.4352964,12.257586],[-9.4350251,12.2585271],[-9.4349919,12.2591221],[-9.4350583,12.2598361],[-9.4349919,12.2604149],[-9.4347262,12.2606529],[-9.4342115,12.2606691],[-9.4327778,12.2605014],[-9.4320915,12.2605069],[-9.43156,12.260615],[-9.4301179,12.2613402],[-9.4294369,12.2619063],[-9.4290063,12.26261],[-9.4285523,12.262916],[-9.4280435,12.2630537],[-9.4272372,12.2630155],[-9.4264544,12.2628319],[-9.4254915,12.2628701],[-9.4245444,12.2631761],[-9.4239337,12.2637268],[-9.4232683,12.2640787],[-9.4226577,12.2646983],[-9.4218749,12.264859],[-9.420372,12.2648896],[-9.4192526,12.2648437],[-9.4180627,12.2645147],[-9.4167476,12.2643082],[-9.4153855,12.2643159],[-9.414908,12.2641323],[-9.4143757,12.2635739],[-9.4136164,12.2631455],[-9.4125909,12.2631072],[-9.4118472,12.2633367],[-9.4109705,12.2638951],[-9.4103286,12.2639028],[-9.4095928,12.2634821],[-9.4088021,12.2623882],[-9.4079567,12.2619139],[-9.4073461,12.2618145],[-9.406806,12.2621205],[-9.4061876,12.2627324],[-9.4055457,12.2630308],[-9.4050995,12.2629619],[-9.4047394,12.2625794],[-9.4044106,12.2616233],[-9.4041679,12.2601316],[-9.404254,12.2594125],[-9.404528,12.2586246],[-9.404802,12.2575537],[-9.4048411,12.2570029],[-9.4044967,12.2566128],[-9.4038548,12.2565593],[-9.402986,12.2567352],[-9.4016474,12.2571024],[-9.4006297,12.2571865],[-9.4000553,12.257413],[-9.3994485,12.2581894],[-9.3988653,12.2586637],[-9.3977733,12.2590309],[-9.3965208,12.2593254],[-9.3955999,12.2592386],[-9.3947753,12.2588762],[-9.3941553,12.2587194],[-9.3935575,12.2589682],[-9.3931922,12.2596389],[-9.3930592,12.2606125],[-9.3928766,12.2616511],[-9.39255,12.26243],[-9.3922732,12.2627275],[-9.3918083,12.2627815],[-9.3913544,12.2626301],[-9.3909503,12.2620838],[-9.3907788,12.2613265],[-9.3905352,12.2603583],[-9.3900869,12.2596714],[-9.389489,12.259217],[-9.3886033,12.2587518],[-9.3871476,12.2582758],[-9.3861236,12.2578972],[-9.3854593,12.2575727],[-9.3847729,12.2570426],[-9.3843523,12.2565071],[-9.3840146,12.2558688],[-9.3828689,12.2554198],[-9.3816954,12.255501],[-9.3813965,12.2556687],[-9.3813467,12.2560094],[-9.3814298,12.2563881],[-9.3814352,12.2568316],[-9.3809952,12.2573027],[-9.3804433,12.2574901],[-9.3799462,12.2573104],[-9.3795979,12.2567864],[-9.3794884,12.2563044],[-9.3792966,12.2558952],[-9.3788268,12.2554171],[-9.3780011,12.2548166],[-9.3771986,12.2544494],[-9.3765254,12.2539828],[-9.3760362,12.2535314],[-9.3756253,12.2527703],[-9.3755078,12.252231],[-9.3754412,12.2516649],[-9.3752965,12.2511791],[-9.374811,12.2508426],[-9.3743141,12.2505863],[-9.3738679,12.2505786],[-9.3733589,12.2506666],[-9.3729801,12.2509051],[-9.3728491,12.2513033],[-9.3726603,12.2515904],[-9.3721435,12.2519614],[-9.3716856,12.2521985],[-9.3709732,12.2527264],[-9.370437,12.2528717],[-9.3700496,12.2527837],[-9.3698461,12.252516],[-9.3692786,12.2521832],[-9.3687031,12.2520685],[-9.3680103,12.2519882],[-9.3670906,12.2517663],[-9.3664917,12.2518008],[-9.3659321,12.2519002],[-9.3656698,12.252122],[-9.3654624,12.2525237],[-9.3653997,12.2529597],[-9.3651689,12.2534301],[-9.3649222,12.2537629],[-9.3645309,12.2540307],[-9.3640259,12.2541263],[-9.3633448,12.2542295],[-9.362108,12.254264],[-9.3613526,12.2542104],[-9.360793,12.2540651],[-9.3600884,12.2539197],[-9.3596343,12.2537247],[-9.3592939,12.2533651],[-9.3590981,12.2529712],[-9.3590394,12.2525007],[-9.3590942,12.2520455],[-9.3592391,12.2514259],[-9.3592939,12.2508254],[-9.3592978,12.2504659],[-9.3591217,12.2502402],[-9.3588477,12.2501446],[-9.3585972,12.2501599],[-9.3583389,12.2502785],[-9.3581354,12.2502708],[-9.3577126,12.2503244],[-9.3573604,12.250573],[-9.3568672,12.2510052],[-9.3564796,12.251227],[-9.3559592,12.2514183],[-9.3556342,12.2513915],[-9.355192,12.2511582],[-9.354777,12.2507986],[-9.3545853,12.2503741],[-9.3542174,12.2499992],[-9.3538143,12.2497124],[-9.3534229,12.2496282],[-9.3526557,12.249655],[-9.3519042,12.2495938],[-9.3513328,12.2494905],[-9.3509884,12.2492457],[-9.350683,12.2489474],[-9.350233,12.2486261],[-9.3495793,12.2483507],[-9.3486477,12.2480677],[-9.3480763,12.2479835],[-9.3474579,12.2480294],[-9.3469139,12.2480141],[-9.3463855,12.2478114],[-9.3460176,12.2479912],[-9.3455204,12.2479185],[-9.3445497,12.2478802],[-9.3437708,12.247995],[-9.3430351,12.2480524],[-9.3424245,12.2479873],[-9.3419509,12.2479453],[-9.3414523,12.2478251],[-9.3409871,12.2480891],[-9.3406875,12.2484813],[-9.3404105,12.2489618],[-9.3403032,12.2494203],[-9.3403484,12.2498346],[-9.3405971,12.2501604],[-9.3409588,12.2504421],[-9.3419366,12.2505526],[-9.3425358,12.2506796],[-9.3431179,12.2509392],[-9.3437566,12.2512983],[-9.344254,12.251707],[-9.3447921,12.2522895],[-9.3454778,12.2529769],[-9.346156,12.2536507],[-9.3467043,12.2542859],[-9.3473769,12.255258],[-9.3478347,12.255965],[-9.3480552,12.2565339],[-9.3481852,12.2569813],[-9.3481795,12.2573403],[-9.3478799,12.2577711],[-9.3473826,12.2582406],[-9.3466873,12.2590084],[-9.3462352,12.2594116],[-9.34541,12.2600191],[-9.3450256,12.2603395],[-9.3444321,12.260704],[-9.3435165,12.2614331],[-9.3429682,12.2619301],[-9.342533,12.2623996],[-9.3424482,12.2626095],[-9.3424143,12.2628801],[-9.3423804,12.2641118],[-9.3424143,12.2659455],[-9.3423804,12.2673318],[-9.3424256,12.2691599],[-9.3423748,12.2696459],[-9.3421603,12.2703141],[-9.341393,12.2712826],[-9.3409933,12.2722043],[-9.3403174,12.272656],[-9.3397917,12.2728548],[-9.3394583,12.2728769],[-9.3392774,12.2727609],[-9.3390739,12.2723522],[-9.3387913,12.2720429],[-9.338407,12.2717392],[-9.3379399,12.2711108],[-9.3374283,12.2696892],[-9.336613,12.268377],[-9.3357337,12.267018],[-9.3346306,12.2669242],[-9.3332877,12.2669555],[-9.332444,12.2669838],[-9.3318618,12.2671164],[-9.3314322,12.2673207],[-9.3312683,12.2675858],[-9.3309057,12.2679084],[-9.3303302,12.2685333],[-9.3291952,12.2695018],[-9.3285502,12.2700688],[-9.3282305,12.270514],[-9.3279987,12.2711389],[-9.3277429,12.2715841],[-9.3270794,12.2723183],[-9.3263201,12.2732556],[-9.3256566,12.2739039],[-9.3247054,12.2746693],[-9.3233945,12.27563],[-9.322827,12.2761455],[-9.3225872,12.2764736],[-9.3219237,12.277239],[-9.3210125,12.2782934],[-9.3204929,12.2787464],[-9.3199654,12.2790901],[-9.3198055,12.2793869],[-9.3194538,12.2798633],[-9.3185665,12.28066],[-9.3183587,12.2809412],[-9.3183267,12.2812301],[-9.3186705,12.2817769],[-9.3191101,12.2823548],[-9.3199574,12.2828703],[-9.3205649,12.2833311],[-9.3211404,12.283831],[-9.3218518,12.2845339],[-9.3224273,12.2852134],[-9.322843,12.2859163],[-9.3230028,12.2864865],[-9.3232666,12.2871582],[-9.3235224,12.287947],[-9.3237542,12.2886577],[-9.32397,12.2890014],[-9.32401,12.2898136],[-9.3241699,12.2909071],[-9.3241779,12.2922504],[-9.3242338,12.2939764],[-9.3241939,12.294898],[-9.324066,12.2961476],[-9.32397,12.2975143],[-9.3238581,12.2984281],[-9.3235944,12.299295],[-9.3233466,12.2997948],[-9.3230828,12.3000447],[-9.3224273,12.3003181],[-9.3213482,12.3009663],[-9.3209086,12.3012475],[-9.3207088,12.3015364],[-9.3207088,12.3021222],[-9.3206608,12.3024892],[-9.3206528,12.3029031],[-9.3208526,12.3034654],[-9.3211164,12.3046681],[-9.3213242,12.3053085],[-9.3217959,12.3059724],[-9.3226272,12.3069642],[-9.3232365,12.3079382],[-9.3235869,12.3087997],[-9.3238243,12.3096832],[-9.3238695,12.3103349],[-9.3236886,12.3129524],[-9.3236773,12.3144323],[-9.3236773,12.3152164],[-9.323553,12.3158791],[-9.3229539,12.3175136],[-9.3221739,12.3197555],[-9.3217782,12.3214011],[-9.3216991,12.3224613],[-9.3212808,12.3231681],[-9.3207495,12.3235105],[-9.3201617,12.3235988],[-9.3189521,12.3233669],[-9.3180252,12.3230577],[-9.3166687,12.322395],[-9.3157417,12.3220858],[-9.314713,12.3222956],[-9.3133,12.3224944],[-9.3122713,12.3228037],[-9.3115252,12.3231571],[-9.3109487,12.3235105],[-9.3105983,12.3240847],[-9.3102931,12.3256419],[-9.3099652,12.3268567],[-9.3096148,12.3277181],[-9.3081792,12.3300041],[-9.3071618,12.3315392],[-9.3066757,12.3324889],[-9.3063026,12.333527],[-9.3057148,12.3359455],[-9.3051157,12.3380989],[-9.3046522,12.3392585],[-9.3042679,12.3405836],[-9.3040757,12.3415554],[-9.3038722,12.3422511],[-9.3036373,12.3431149],[-9.303594,12.3440258],[-9.3038722,12.344537],[-9.3043809,12.3445812],[-9.3049687,12.3443714],[-9.3059635,12.3441505],[-9.306947,12.3440843],[-9.3084278,12.3440732],[-9.3094226,12.3441174],[-9.3102818,12.344272],[-9.3109826,12.3445591],[-9.3114461,12.3449898],[-9.311593,12.3454757],[-9.311593,12.346856],[-9.311627,12.3485014],[-9.3115252,12.3495725],[-9.3111522,12.3507541],[-9.3108696,12.352024],[-9.3106774,12.3534596],[-9.3104174,12.3541884],[-9.3099765,12.3547074],[-9.3093774,12.3550938],[-9.3086313,12.3553478],[-9.3076479,12.3553478],[-9.3065513,12.3554472],[-9.3055453,12.3557012],[-9.3038496,12.3560656],[-9.3014907,12.3566711],[-9.2997343,12.3573489],[-9.2989321,12.3579843],[-9.2983032,12.3590222],[-9.2976744,12.3601024],[-9.2975226,12.3610344],[-9.2977395,12.362284],[-9.2986935,12.3630465],[-9.299344,12.3643173],[-9.3007101,12.365567],[-9.301881,12.3669225],[-9.3029001,12.3677485],[-9.3038504,12.3680298],[-9.3050654,12.3680376],[-9.3059926,12.368061],[-9.3068639,12.368225],[-9.3076552,12.3684905],[-9.3085905,12.3689121],[-9.3100133,12.3697397],[-9.3109885,12.3701769],[-9.3118917,12.3704814],[-9.312707,12.3706844],[-9.3135224,12.3707859],[-9.3146174,12.3707001],[-9.3158724,12.3706142],[-9.3165518,12.3703565],[-9.3171593,12.3703487],[-9.3179027,12.3705127],[-9.3189578,12.371028],[-9.3198451,12.3713325],[-9.3206924,12.3714886],[-9.3217235,12.3715511],[-9.3230424,12.3715433],[-9.3238977,12.3716214],[-9.3253765,12.3718634],[-9.3261998,12.3721679],[-9.327087,12.3727925],[-9.3276546,12.3734484],[-9.3280542,12.3740652],[-9.3281901,12.374518],[-9.3281502,12.375369],[-9.3281342,12.3760795],[-9.328342,12.3766963],[-9.3287177,12.3771179],[-9.3292293,12.3774381],[-9.329517,12.3778362],[-9.3297648,12.3784374],[-9.3301325,12.3788278],[-9.3306361,12.3791635],[-9.3311077,12.3793353],[-9.3317791,12.3795695],[-9.334329,12.3807406],[-9.3350564,12.3811544],[-9.3358637,12.3814277],[-9.3365272,12.3814667],[-9.3371107,12.3813496],[-9.3376302,12.3811154],[-9.3381338,12.3811232],[-9.3386134,12.3812247],[-9.339077,12.3815136],[-9.3393328,12.3818727],[-9.3394128,12.3822709],[-9.3397165,12.3831453],[-9.3401002,12.384051],[-9.3405318,12.3850815],[-9.3408356,12.3862995],[-9.3411473,12.3872519],[-9.3413791,12.3882825],[-9.341475,12.3891569],[-9.341467,12.3899142],[-9.3413471,12.3906403],[-9.3411873,12.391218],[-9.3406837,12.3923266],[-9.3399329,12.3941912],[-9.3391901,12.3960008],[-9.3389541,12.396897],[-9.3389104,12.3974347],[-9.3390765,12.3979213],[-9.3393736,12.398459],[-9.3399242,12.3992357],[-9.340265,12.3998844],[-9.3408768,12.4008489],[-9.3416371,12.4018049],[-9.3422139,12.4026841],[-9.3426596,12.4038278],[-9.3430529,12.4054495],[-9.3432713,12.4065591],[-9.3434986,12.4069773],[-9.343752,12.4071992],[-9.3440491,12.4072419],[-9.3447046,12.4070968],[-9.3454911,12.4070968],[-9.3463476,12.4072334],[-9.3471603,12.4075406],[-9.3482615,12.4081979],[-9.3490218,12.4085905],[-9.3496685,12.4087953],[-9.3502628,12.4088721],[-9.3510494,12.408838],[-9.3518009,12.4088636],[-9.3534614,12.409205],[-9.3544315,12.4095379],[-9.355017,12.4098622],[-9.3553841,12.4103146],[-9.3555676,12.410895],[-9.3555239,12.4122862],[-9.3553141,12.4137542],[-9.3551743,12.4154185],[-9.3549384,12.4162891],[-9.3545626,12.4180778],[-9.3544577,12.4185765],[-9.3544315,12.4196604],[-9.35458,12.4206333],[-9.3548335,12.4213417],[-9.3551306,12.421888],[-9.3555589,12.4222635],[-9.3562143,12.4225281],[-9.3576388,12.4229463],[-9.3591944,12.4232962],[-9.3605752,12.4233559],[-9.3617026,12.423262],[-9.3628387,12.4229804],[-9.3641234,12.4225537],[-9.3655479,12.4218709],[-9.3665355,12.4212564],[-9.3674181,12.4209235],[-9.3682659,12.4207358],[-9.3689563,12.4207358],[-9.3696729,12.4208723],[-9.3702584,12.4211796],[-9.3707653,12.4217258],[-9.3718053,12.422878],[-9.3725219,12.423629],[-9.3731861,12.4244398],[-9.3740251,12.4255749],[-9.3746718,12.4262321],[-9.3758691,12.427188],[-9.376944,12.4279305],[-9.377984,12.428562],[-9.378788,12.4293814],[-9.3792337,12.4300214],[-9.3794435,12.4306701],[-9.3794172,12.4315064],[-9.379225,12.4328805],[-9.3791988,12.4339302],[-9.3792599,12.435108],[-9.3794609,12.4366356],[-9.3797668,12.4381547],[-9.379863,12.4392044],[-9.379828,12.4401176],[-9.3796794,12.4411416],[-9.3794085,12.4424559],[-9.3791289,12.4446406],[-9.3789715,12.4463901],[-9.3789541,12.4473117],[-9.3790502,12.4482078],[-9.3792862,12.4488308],[-9.3797406,12.4499316],[-9.3801863,12.4513397],[-9.380567,12.4520812],[-9.3812468,12.4526484],[-9.3820872,12.452926],[-9.3829771,12.4530225],[-9.3840894,12.4529984],[-9.385486,12.4531673],[-9.3867837,12.4535777],[-9.388959,12.4541811],[-9.3909612,12.4545793],[-9.3921971,12.4546759],[-9.3932724,12.4545914],[-9.3941128,12.4542656],[-9.3947308,12.4538552],[-9.3950645,12.4532759],[-9.3953611,12.4521777],[-9.3960161,12.4507053],[-9.3965352,12.4498605],[-9.3971779,12.4492088],[-9.3979195,12.4487744],[-9.3986363,12.4486416],[-9.3993037,12.4487502],[-9.3999711,12.449064],[-9.4003913,12.4494743],[-9.4006138,12.4500054],[-9.4005891,12.4508381],[-9.4007374,12.4517432],[-9.4009598,12.4525398],[-9.401343,12.4533001],[-9.4034811,12.4562086],[-9.4056193,12.4589843],[-9.4063732,12.4600946],[-9.4068923,12.4611686],[-9.4071889,12.4622065],[-9.407226,12.4630754],[-9.4070406,12.4640046],[-9.4066328,12.4646804],[-9.405953,12.4651632],[-9.4051744,12.4657545],[-9.4045935,12.4664906],[-9.403753,12.467275],[-9.4028137,12.4679508],[-9.4018373,12.4684577],[-9.4007992,12.4687835],[-9.4002924,12.468699],[-9.3996992,12.4683611],[-9.3990812,12.4683491],[-9.3985374,12.4685663],[-9.3979318,12.4689766],[-9.3966464,12.4691697],[-9.3956948,12.4694714],[-9.3948296,12.4701592],[-9.3940757,12.4707868],[-9.393087,12.4718487],[-9.3919623,12.472609],[-9.3906398,12.4733089],[-9.3896387,12.4740209],[-9.3892061,12.4745881],[-9.3884152,12.4752518],[-9.3873646,12.4760965],[-9.3865613,12.4768085],[-9.3857826,12.4772067],[-9.3850658,12.4773877],[-9.3841141,12.4773756],[-9.3831254,12.4774601],[-9.3816175,12.4775084],[-9.3766985,12.4773877],[-9.3757963,12.4774601],[-9.3749559,12.4777015],[-9.3741772,12.4777377],[-9.372138,12.4774842],[-9.3710627,12.4774842],[-9.3699998,12.4776773],[-9.368838,12.4780152],[-9.3679605,12.4783531],[-9.3673178,12.4788358],[-9.3667987,12.4794874],[-9.3664774,12.4802718],[-9.3662549,12.4811768],[-9.3659583,12.4819974],[-9.3657235,12.4831076],[-9.3656864,12.4840609],[-9.3658224,12.4852917],[-9.3660325,12.4863898],[-9.3664403,12.4873672],[-9.3670336,12.4881637],[-9.3674662,12.4889601],[-9.3676639,12.4899978],[-9.3677628,12.4912407],[-9.3677257,12.4924112],[-9.3676021,12.4933162],[-9.367219,12.494004],[-9.3665145,12.4947521],[-9.3654763,12.4953795],[-9.3639314,12.4964897],[-9.3621146,12.4977566],[-9.3598775,12.4995425],[-9.3588641,12.5002303],[-9.3577023,12.500906],[-9.3565776,12.5013283],[-9.3556383,12.5015575],[-9.3547855,12.5014248],[-9.353253,12.5008577],[-9.3502744,12.5000251],[-9.3435015,12.4982876],[-9.340906,12.497829],[-9.3395959,12.4973826],[-9.3384589,12.4967913],[-9.3376308,12.4961639],[-9.3370499,12.4955485],[-9.3367533,12.4949452],[-9.3367039,12.4940522],[-9.3368275,12.4930266],[-9.3372353,12.4913131],[-9.3378162,12.4888635],[-9.3382117,12.4869328],[-9.3383971,12.4851348],[-9.3384589,12.4837109],[-9.3384218,12.4825284],[-9.3382241,12.481563],[-9.3379398,12.4807183],[-9.3374578,12.4800184],[-9.336778,12.4795236],[-9.3360241,12.4792219],[-9.3351837,12.4791013],[-9.3343062,12.4792702],[-9.3331691,12.4797167],[-9.3319085,12.4800063],[-9.3301534,12.4802959],[-9.3286085,12.4807183],[-9.3273726,12.4811889],[-9.3256794,12.4822025],[-9.3241592,12.4832283],[-9.3228738,12.4842419],[-9.3217615,12.4853038],[-9.3209952,12.4863053],[-9.3201053,12.4891652],[-9.3199694,12.4902391],[-9.3200435,12.4912407],[-9.3203525,12.4923267],[-9.3205626,12.4933765],[-9.3205132,12.4947159],[-9.3203649,12.4962845],[-9.3201053,12.4975998],[-9.3197222,12.4988547],[-9.319302,12.4997114],[-9.3187087,12.5003751],[-9.3177571,12.5010025],[-9.3164717,12.5016179],[-9.3159526,12.5024625],[-9.3157479,12.5028038],[-9.3154459,12.5033071],[-9.3151493,12.5042724],[-9.314692,12.5053222],[-9.3145788,12.5062353],[-9.3111051,12.5050552],[-9.3084164,12.5035383],[-9.3073449,12.5027309],[-9.3064997,12.501453],[-9.3056188,12.500428],[-9.3052151,12.5001308],[-9.3047637,12.4999963],[-9.3025375,12.4998694],[-9.3004119,12.4992059],[-9.2994976,12.499241],[-9.2984982,12.4987042],[-9.2979375,12.4980113],[-9.2972742,12.4972552],[-9.2973194,12.4962043],[-9.2971594,12.4950444],[-9.2964032,12.4941629],[-9.2951363,12.4929857],[-9.2948108,12.4919373],[-9.2945687,12.490367],[-9.2940809,12.4889936],[-9.2940152,12.4885538],[-9.29371,12.4882626],[-9.2928677,12.4882923],[-9.2915963,12.4885074],[-9.2894806,12.4891502],[-9.2887607,12.4888061],[-9.2882546,12.4879338],[-9.2875814,12.4873736],[-9.2853193,12.4864323],[-9.2846329,12.4858204],[-9.2837775,12.4855785],[-9.2833432,12.4861039],[-9.2832552,12.4866454],[-9.283376,12.4875421],[-9.2832361,12.4879039],[-9.2829759,12.4881878],[-9.282682,12.488387],[-9.2823295,12.488565],[-9.2818284,12.4886621],[-9.281214,12.4886693],[-9.2802545,12.4891927],[-9.2792633,12.4895074],[-9.2789515,12.4902849],[-9.2786459,12.4907983],[-9.277988,12.4914107],[-9.2776399,12.4915601],[-9.2774984,12.4919186],[-9.277047,12.4924975],[-9.276378,12.4929195],[-9.2753691,12.4932572],[-9.2747108,12.4931993],[-9.2738656,12.4934182],[-9.2731799,12.4933676],[-9.2722028,12.4933738],[-9.2720017,12.4934834],[-9.271734,12.493883],[-9.271433,12.4945663],[-9.2713706,12.4948241],[-9.2713782,12.4950556],[-9.2715657,12.4953133],[-9.2721897,12.4957209],[-9.2726443,12.4962245],[-9.2729145,12.496737],[-9.272806,12.497937],[-9.272916,12.4981911],[-9.272717,12.4987117],[-9.2719285,12.4992952],[-9.2712138,12.4996416],[-9.270443,12.5002744],[-9.2701998,12.5013755],[-9.2699515,12.5015573],[-9.2695752,12.501661],[-9.2691711,12.5015498],[-9.2689019,12.5015628],[-9.2685094,12.5014266],[-9.2682573,12.5011571],[-9.2675399,12.5006189],[-9.2673154,12.5005978],[-9.2669908,12.5007096],[-9.2659963,12.5014864],[-9.265446,12.5015062],[-9.2650402,12.5015907],[-9.2645776,12.502039],[-9.2642291,12.5030196],[-9.2635905,12.503513],[-9.2633735,12.5037594],[-9.2630249,12.5038662],[-9.2627953,12.5038141],[-9.2622504,12.5028957],[-9.2614511,12.5024262],[-9.2612915,12.5020818],[-9.2605693,12.5020065],[-9.259879,12.5022387],[-9.2593817,12.5021267],[-9.2591843,12.5022082],[-9.2579014,12.5031723],[-9.2571504,12.5038836],[-9.2548983,12.5049684],[-9.2530484,12.5053764],[-9.2522911,12.5054235],[-9.2516823,12.5060946],[-9.2513902,12.5061739],[-9.2506362,12.5060122],[-9.250054,12.506026],[-9.249545,12.5052186],[-9.2493183,12.5050384],[-9.2488152,12.5049275],[-9.2481475,12.5042382],[-9.2477171,12.5040931],[-9.2467975,12.5041142],[-9.2461982,12.5039125],[-9.24587,12.5032301],[-9.2452581,12.5023438],[-9.2450881,12.5022394],[-9.2446627,12.5021686],[-9.2443362,12.5020651],[-9.2439358,12.5017799],[-9.2435626,12.5017324],[-9.2422805,12.5020809],[-9.2408199,12.5015771],[-9.2404413,12.5017641],[-9.238527,12.5029307],[-9.2377052,12.5032608],[-9.2371765,12.5032341],[-9.2361241,12.5027309],[-9.2357729,12.5021285],[-9.2357783,12.5013152],[-9.2362057,12.500655],[-9.2362029,12.5003383],[-9.236065,12.4998575],[-9.235617,12.4994366],[-9.2345305,12.4985496],[-9.2342009,12.498587],[-9.2333987,12.4993767],[-9.2321731,12.5006669],[-9.2316698,12.5006665],[-9.2312121,12.5007148],[-9.2302768,12.5005018],[-9.2300158,12.5002402],[-9.2294708,12.5002008],[-9.2287784,12.5003064],[-9.2279778,12.5007448],[-9.2274639,12.501214],[-9.227161,12.5012571],[-9.2268742,12.501199],[-9.2263501,12.5004925],[-9.2257588,12.4994558],[-9.2253325,12.4991868],[-9.2244724,12.4988277],[-9.2239093,12.4987852],[-9.2224413,12.4988889],[-9.2203544,12.4988567],[-9.2196072,12.4987596],[-9.2189952,12.4989538],[-9.218475,12.4991853],[-9.2181386,12.4991697],[-9.2177023,12.4989836],[-9.2173836,12.4988799],[-9.2172127,12.4985355],[-9.2172013,12.498289],[-9.2170712,12.497994],[-9.2170253,12.4976803],[-9.2171286,12.4971425],[-9.2171321,12.4964958],[-9.2170024,12.4957048],[-9.2168761,12.4955068],[-9.2166504,12.4953164],[-9.215633,12.4947898],[-9.2144587,12.494576],[-9.2139461,12.4947077],[-9.2137434,12.4946367],[-9.2135837,12.4946202],[-9.2130242,12.4950027],[-9.2124637,12.4950592],[-9.2120259,12.4949131],[-9.211739,12.4947077],[-9.2112935,12.4941166],[-9.2103122,12.4935761],[-9.2097292,12.4935004],[-9.2085374,12.4937292],[-9.2076634,12.4941003],[-9.2072828,12.4941139],[-9.2069079,12.4939383],[-9.2066803,12.4934869],[-9.2066478,12.4930981],[-9.2063609,12.4927321],[-9.2058866,12.4922765],[-9.2054505,12.4921458],[-9.2051369,12.4921346],[-9.2041844,12.4928479],[-9.2032433,12.4941447],[-9.202641,12.4948],[-9.20188,12.4956486],[-9.2015402,12.4957139],[-9.2010665,12.4955319],[-9.1997721,12.4948217],[-9.1979318,12.4932638],[-9.1977517,12.4928382],[-9.1974075,12.4923156],[-9.1971262,12.4920674],[-9.1965475,12.4920497],[-9.1953433,12.4924049],[-9.1942646,12.492511],[-9.1935714,12.4917756],[-9.1926756,12.4915571],[-9.1914631,12.4917761],[-9.1905988,12.4918422],[-9.1901263,12.4921836],[-9.1897043,12.4929282],[-9.1893527,12.493092],[-9.188332,12.4933015],[-9.1875556,12.4932366],[-9.1868415,12.4930589],[-9.1862134,12.4925795],[-9.1851105,12.4913706],[-9.1844305,12.4911392],[-9.183731,12.4907775],[-9.1831264,12.490784],[-9.1821656,12.4909719],[-9.1819575,12.4911769],[-9.1817198,12.4915716],[-9.1814658,12.4917505],[-9.1804275,12.4917875],[-9.1799193,12.4918946],[-9.1796682,12.4917688],[-9.1794408,12.4914198],[-9.1792991,12.4910611],[-9.1787234,12.4907306],[-9.1786152,12.4903457],[-9.1782279,12.4901818],[-9.1763341,12.4902674],[-9.1759964,12.490237],[-9.1752647,12.4896096],[-9.1743947,12.4901524],[-9.1735838,12.4903297],[-9.1725801,12.4894727],[-9.1712199,12.4888744],[-9.1702381,12.4891174],[-9.1696099,12.4893596],[-9.1689355,12.4890462],[-9.1679373,12.4887113],[-9.1666267,12.4887798],[-9.1653216,12.4884764],[-9.1639879,12.4883428],[-9.1620987,12.4884624],[-9.1602067,12.4887656],[-9.1592129,12.4895474],[-9.1581234,12.4894702],[-9.1575605,12.4895739],[-9.1568041,12.4892101],[-9.1564849,12.488805],[-9.1562795,12.488305],[-9.1560394,12.4872348],[-9.1560339,12.486758],[-9.1558492,12.4862675],[-9.155343,12.4858823],[-9.1548336,12.4857058],[-9.1536867,12.486023],[-9.1530427,12.486021],[-9.1510276,12.4850733],[-9.1500778,12.4844822],[-9.1492735,12.4832955],[-9.1483795,12.4823432],[-9.1475815,12.4819176],[-9.1468599,12.4811026],[-9.1457492,12.4807851],[-9.1447924,12.4802077],[-9.1435223,12.479644],[-9.1428117,12.479547],[-9.1421065,12.4794986],[-9.1418374,12.4795215],[-9.1416125,12.4794827],[-9.1392843,12.4788179],[-9.138777,12.4787682],[-9.1384593,12.4788836],[-9.1375226,12.4795375],[-9.1365997,12.4792543],[-9.1361763,12.4793381],[-9.1357404,12.4797565],[-9.1351074,12.479779],[-9.1349076,12.4796177],[-9.1347857,12.4794266],[-9.1348608,12.4791066],[-9.1345714,12.4789469],[-9.1341577,12.479037],[-9.1339027,12.4788868],[-9.1337033,12.4788711],[-9.1337144,12.4787196],[-9.1339212,12.4781461],[-9.1341682,12.4775292],[-9.1341909,12.4770821],[-9.1341392,12.4765915],[-9.1339471,12.4761587],[-9.1337826,12.4760132],[-9.1330795,12.4758033],[-9.1327163,12.4754627],[-9.1320377,12.4743028],[-9.1312693,12.4733578],[-9.130607,12.473171],[-9.1302497,12.472218],[-9.1301389,12.4708978],[-9.1298951,12.4707463],[-9.1293975,12.4707901],[-9.1291119,12.4704289],[-9.128892,12.469931],[-9.1283186,12.4685506],[-9.1276906,12.4675911],[-9.127225,12.4661866],[-9.1267707,12.4657391],[-9.1246953,12.4653133],[-9.1229694,12.4647559],[-9.1225187,12.4648641],[-9.1219386,12.4657317],[-9.1212834,12.4658909],[-9.1205506,12.4657587],[-9.1195419,12.4649842],[-9.1189395,12.4647767],[-9.1180545,12.4648514],[-9.1170486,12.4646206],[-9.1159022,12.46462],[-9.1149711,12.4640354],[-9.1138951,12.4633469],[-9.1123753,12.4629999],[-9.1110983,12.4622103],[-9.1106788,12.4619378],[-9.1099506,12.460188],[-9.109169,12.459163],[-9.108025,12.457734],[-9.107072,12.456305],[-9.10626,12.455311],[-9.10472,12.454618],[-9.10368,12.454233],[-9.101832,12.454195],[-9.100985,12.453964],[-9.09964,12.453042],[-9.097925,12.452779],[-9.097135,12.452616],[-9.096448,12.45228],[-9.095162,12.450874],[-9.094019,12.449063],[-9.092514,12.447842],[-9.090684,12.445728],[-9.089857,12.444993],[-9.088397,12.444109],[-9.086872,12.443346],[-9.085252,12.442108],[-9.08368,12.440798],[-9.082542,12.440488],[-9.0812617,12.4403445],[-9.08106,12.440322],[-9.078922,12.439487],[-9.077153,12.439345],[-9.073818,12.439345],[-9.072294,12.438964],[-9.07096,12.438773],[-9.069296,12.438678],[-9.068026,12.438255],[-9.067006,12.437654],[-9.064719,12.435605],[-9.063576,12.435271],[-9.061241,12.435438],[-9.059812,12.434867],[-9.058097,12.433914],[-9.056572,12.433914],[-9.054935,12.434366],[-9.053394,12.434481],[-9.052094,12.4342],[-9.050331,12.433128],[-9.049045,12.431603],[-9.046282,12.430484],[-9.0441434,12.4295735],[-9.042756,12.428983],[-9.040374,12.428173],[-9.038109,12.428206],[-9.037223,12.428013],[-9.036468,12.427601],[-9.0351776,12.4260366],[-9.0340216,12.4256515],[-9.0327559,12.4239877],[-9.0316014,12.4239174],[-9.0299014,12.4232564],[-9.026653,12.423742],[-9.025518,12.423701],[-9.024795,12.423457],[-9.023632,12.422661],[-9.022842,12.422361],[-9.019936,12.422123],[-9.014583,12.420428],[-9.012551,12.418954],[-9.011217,12.41762],[-9.010074,12.415715],[-9.008307,12.412997],[-9.00369,12.40752],[-9.003023,12.40602],[-9.003417,12.405026],[-9.003833,12.40197],[-9.005071,12.399445],[-9.005881,12.397539],[-9.006786,12.395777],[-9.006834,12.394562],[-9.006453,12.392918],[-9.00592,12.392127],[-9.004759,12.391325],[-9.00374,12.391121],[-9.002111,12.390917],[-9.000583,12.391019],[-8.998138,12.391019],[-8.995591,12.390102],[-8.994267,12.388065],[-8.993758,12.38562],[-8.993249,12.383888],[-8.9848754,12.3764453],[-8.9796195,12.3717736],[-8.964829,12.358627],[-8.962791,12.357914],[-8.959837,12.357812],[-8.957087,12.357506],[-8.9546187,12.3573729],[-8.941909,12.338254],[-8.933353,12.324808],[-8.93376,12.323891],[-8.938548,12.317576],[-8.940178,12.315946],[-8.943946,12.313196],[-8.945984,12.311566],[-8.948429,12.309121],[-8.951383,12.305658],[-8.95454,12.300972],[-8.955457,12.298731],[-8.956578,12.295777],[-8.958004,12.292212],[-8.96544,12.280701],[-8.970431,12.272654],[-8.973691,12.267765],[-8.977154,12.262366],[-8.9811271,12.255745],[-8.984081,12.249124],[-8.98622,12.243928],[-8.988054,12.240057],[-8.988461,12.238835],[-8.988257,12.237511],[-8.987646,12.235983],[-8.987952,12.234455],[-8.989581,12.231093],[-8.9904981,12.227528],[-8.9911091,12.225796],[-8.9912111,12.224065],[-8.9913917,12.22303],[-8.9915522,12.2220733],[-8.9921695,12.2207909],[-8.9922846,12.2198961],[-8.9922675,12.2188073],[-8.9920534,12.21857],[-8.9914937,12.2185284],[-8.9910314,12.218689],[-8.9900607,12.2188265],[-8.9884475,12.2188265],[-8.9875453,12.2186771],[-8.9869369,12.2188198],[-8.9862008,12.219123],[-8.9857506,12.2194382],[-8.9855071,12.219786],[-8.9852882,12.2202885],[-8.9852315,12.2208728],[-8.9850983,12.2220386],[-8.9851376,12.2225224],[-8.9855864,12.2228795],[-8.9861398,12.2231129],[-8.9862128,12.2233091],[-8.9861216,12.2235826],[-8.9861033,12.2238383],[-8.9860242,12.2239869],[-8.9858113,12.224094],[-8.9851177,12.2241415],[-8.9846432,12.2240404],[-8.9842851,12.223861],[-8.9837063,12.2240048],[-8.9829587,12.2239987],[-8.9824713,12.2237669],[-8.9813806,12.2239205],[-8.980707,12.2237729],[-8.980145,12.2238967],[-8.9795875,12.2241772],[-8.9792201,12.224204],[-8.9787905,12.2239037],[-8.9785667,12.2233095],[-8.9781229,12.2216602],[-8.977839,12.220027],[-8.9777384,12.218268],[-8.9777868,12.2172143],[-8.9779876,12.2167862],[-8.9781281,12.2155089],[-8.9781214,12.2148894],[-8.9782188,12.2145268],[-8.9781883,12.2139857],[-8.9779424,12.2136507],[-8.9774918,12.2134083],[-8.9766248,12.2132187],[-8.9758156,12.2132722],[-8.9755054,12.2133435],[-8.9749697,12.2133105],[-8.9736741,12.2135814],[-8.9719137,12.2136791],[-8.9712733,12.213381],[-8.9705835,12.213177],[-8.9704765,12.2128422],[-8.9705362,12.2120953],[-8.9706555,12.2118443],[-8.9707104,12.211729],[-8.9712823,12.2109506],[-8.9717785,12.2102325],[-8.9717212,12.2096569],[-8.9715173,12.2092894],[-8.9715387,12.2089731],[-8.971849,12.2084676],[-8.9724904,12.2076344],[-8.9731907,12.2070504],[-8.9739541,12.2065803],[-8.9746607,12.205806],[-8.97497,12.2053756],[-8.9751647,12.2046382],[-8.975189,12.2042457],[-8.9751342,12.2040971],[-8.9749274,12.2039246],[-8.9746144,12.2038919],[-8.9732229,12.2043767],[-8.9726034,12.2044777],[-8.9717206,12.2043598],[-8.971125,12.2041566],[-8.9707295,12.2039246],[-8.9705145,12.2036573],[-8.9701385,12.2028431],[-8.969823,12.2025867],[-8.9695249,12.2024143],[-8.9690057,12.2017606],[-8.9686367,12.2017304],[-8.9672917,12.2015846],[-8.9669697,12.2013142],[-8.9668647,12.2013245],[-8.9665438,12.2013558],[-8.966308,12.2014478],[-8.9656652,12.2012251],[-8.965434,12.2006242],[-8.965613,12.2002022],[-8.9661438,12.1996647],[-8.9665499,12.1991497],[-8.9674588,12.1986686],[-8.9685028,12.1985075],[-8.9688861,12.1983172],[-8.9694703,12.1977344],[-8.9706166,12.1954494],[-8.9708025,12.1946719],[-8.9708816,12.1931793],[-8.9708624,12.1926544],[-8.97008,12.1918862],[-8.9679866,12.1892196],[-8.9677241,12.1884399],[-8.9671185,12.187323],[-8.9665378,12.1866499],[-8.9662822,12.1862752],[-8.9659111,12.1861682],[-8.9655522,12.186531],[-8.9649787,12.1874187],[-8.9642831,12.1878944],[-8.9641381,12.1882736],[-8.9639156,12.1890643],[-8.9623692,12.1918526],[-8.9621437,12.1920848],[-8.9614733,12.1919873],[-8.9599368,12.1917581],[-8.9587217,12.1914937],[-8.9575762,12.1915083],[-8.9563164,12.1913679],[-8.9560492,12.1914429],[-8.9558496,12.1917036],[-8.9554469,12.1924182],[-8.9552218,12.1925609],[-8.9545158,12.1924089],[-8.9539243,12.1922067],[-8.9532628,12.1916273],[-8.9524515,12.1910816],[-8.9523806,12.1909077],[-8.9526324,12.1901875],[-8.9525507,12.1896589],[-8.9524962,12.1891713],[-8.9518757,12.1889215],[-8.9516384,12.1885588],[-8.9514985,12.188422],[-8.95117,12.1883209],[-8.9508414,12.1884458],[-8.9503912,12.1889394],[-8.9500594,12.1891974],[-8.9492894,12.1896571],[-8.9489372,12.1900336],[-8.9489901,12.190332],[-8.9491802,12.1910408],[-8.9492256,12.1917981],[-8.9491501,12.1926025],[-8.9489858,12.1930426],[-8.9482382,12.1935944],[-8.9480611,12.1940059],[-8.947644,12.1942264],[-8.9445714,12.1941153],[-8.9439843,12.1936309],[-8.9441399,12.1926818],[-8.944021,12.1916798],[-8.9443013,12.1910742],[-8.9446055,12.1907591],[-8.9446481,12.1902536],[-8.9444887,12.190084],[-8.943625,12.1899497],[-8.9417278,12.1893913],[-8.9411806,12.1894959],[-8.9404291,12.1899707],[-8.939301,12.1907703],[-8.9377338,12.1913328],[-8.9371275,12.1913857],[-8.9351983,12.191238],[-8.9340208,12.1909933],[-8.9331713,12.190971],[-8.9318157,12.1905988],[-8.9309772,12.1910566],[-8.9298262,12.1911892],[-8.9291006,12.1915198],[-8.9281751,12.1918683],[-8.9279218,12.1922694],[-8.9279216,12.1926605],[-8.9282095,12.1930426],[-8.9284772,12.193108],[-8.9289213,12.1933994],[-8.9305893,12.1939223],[-8.9308377,12.1941605],[-8.9308638,12.1947034],[-8.9306735,12.1952547],[-8.9304685,12.1967738],[-8.9306123,12.1979939],[-8.9305908,12.198492],[-8.9303936,12.1989653],[-8.9299556,12.1991972],[-8.9283783,12.1993697],[-8.9278432,12.1993144],[-8.92723,12.1990367],[-8.9263393,12.198299],[-8.9257587,12.1977076],[-8.9255265,12.197663],[-8.9252527,12.1978236],[-8.924761,12.1983507],[-8.9247734,12.1989285],[-8.9248775,12.199249],[-8.92462,12.1995659],[-8.9237751,12.2000503],[-8.9223801,12.2009645],[-8.9219857,12.2010466],[-8.9211948,12.2009693],[-8.9201699,12.2011873],[-8.9198361,12.2021277],[-8.9190211,12.2029944],[-8.9189044,12.2034636],[-8.9191324,12.2042457],[-8.9188647,12.2046263],[-8.9185268,12.2046999],[-8.9180312,12.2043766],[-8.9175323,12.2036333],[-8.9167895,12.2026273],[-8.9154967,12.2015373],[-8.9145877,12.2008206],[-8.9143383,12.2003211],[-8.9142883,12.1999147],[-8.9144633,12.199505],[-8.9148189,12.199221],[-8.9153635,12.1987316],[-8.9156893,12.1987043],[-8.9164677,12.1992983],[-8.9172342,12.1996849],[-8.9176479,12.1995124],[-8.9179886,12.1987453],[-8.9178874,12.1981578],[-8.9180495,12.197449],[-8.9178487,12.1971219],[-8.917002,12.1966045],[-8.91533,12.1942557],[-8.9151502,12.1929531],[-8.9149367,12.1922167],[-8.9133692,12.1913637],[-8.9124267,12.1912682],[-8.9103567,12.1906236],[-8.9097556,12.1904134],[-8.9086,12.1903311],[-8.9075919,12.1901786],[-8.9058721,12.1905245],[-8.9054455,12.1909063],[-8.9053016,12.1916676],[-8.9048936,12.1923048],[-8.9031666,12.1926182],[-8.9023993,12.1921546],[-8.9021239,12.1917728],[-8.9025553,12.1908273],[-8.9030016,12.1886893],[-8.9029646,12.1878313],[-8.9042494,12.1842685],[-8.9051134,12.1832114],[-8.9052214,12.182365],[-8.9053848,12.1819109],[-8.9048686,12.1817679],[-8.9041631,12.1818015],[-8.9036902,12.1815386],[-8.9026465,12.1804673],[-8.9024192,12.1799707],[-8.9024595,12.1795896],[-8.903036,12.179083],[-8.9023305,12.1782356],[-8.901266,12.177717],[-8.900885,12.1768311],[-8.8997923,12.1764358],[-8.8977962,12.176419],[-8.8963938,12.1754854],[-8.8957485,12.1749472],[-8.8949906,12.17468],[-8.8945761,12.1747355],[-8.8938251,12.1752256],[-8.8932964,12.1762003],[-8.892892,12.1761499],[-8.8924127,12.1755242],[-8.8919664,12.1752719],[-8.8919036,12.174005],[-8.8915963,12.1722781],[-8.8917745,12.1713548],[-8.8924667,12.1706597],[-8.8926597,12.1702037],[-8.8937857,12.1698455],[-8.8942514,12.1699514],[-8.8950432,12.1699221],[-8.8952065,12.1697243],[-8.8952323,12.1691944],[-8.8953566,12.1687074],[-8.8961717,12.1669241],[-8.8965229,12.1664358],[-8.8966605,12.1658891],[-8.896303,12.1650157],[-8.8945896,12.1633113],[-8.8934459,12.1626833],[-8.8914389,12.1620712],[-8.8908256,12.1619543],[-8.8905144,12.1613791],[-8.890678,12.1610508],[-8.8923067,12.1596786],[-8.8924087,12.1590862],[-8.891992,12.1582528],[-8.891557,12.1580096],[-8.8904471,12.1582956],[-8.8898163,12.158646],[-8.8890972,12.1590613],[-8.8883404,12.1590804],[-8.88711,12.1593905],[-8.8864903,12.1592656],[-8.8861651,12.1589724],[-8.8859673,12.1583249],[-8.886226,12.1575718],[-8.8871128,12.157095],[-8.8871901,12.1566714],[-8.8864357,12.1554294],[-8.8853058,12.1545499],[-8.8844042,12.1529788],[-8.8836865,12.1514398],[-8.8835762,12.1500959],[-8.8835018,12.1493089],[-8.8837504,12.1475176],[-8.8839413,12.1473039],[-8.8857393,12.1476304],[-8.8865442,12.1476753],[-8.8873271,12.1474642],[-8.8882549,12.1456507],[-8.8883714,12.1446409],[-8.8887753,12.1440562],[-8.8894956,12.1417501],[-8.8894432,12.1413076],[-8.8892646,12.1409583],[-8.8892145,12.1407354],[-8.8898716,12.1402416],[-8.8904141,12.1396524],[-8.891382,12.1392586],[-8.8926806,12.1388637],[-8.8932848,12.1384504],[-8.8940103,12.138435],[-8.8946337,12.1386027],[-8.8947867,12.1383919],[-8.8947556,12.1378756],[-8.8944216,12.1368354],[-8.8941498,12.1366911],[-8.8937925,12.1367442],[-8.8934868,12.1366369],[-8.8933661,12.1362982],[-8.893412,12.1360077],[-8.893667,12.1354308],[-8.8937602,12.1343313],[-8.8935629,12.1332767],[-8.8932812,12.1320962],[-8.8928685,12.1315839],[-8.8923668,12.1312604],[-8.8923169,12.131057],[-8.8924489,12.1308975],[-8.8929149,12.1306546],[-8.8936038,12.1305527],[-8.8948177,12.130123],[-8.8953741,12.1297461],[-8.8958973,12.1289461],[-8.8964361,12.1278941],[-8.8966196,12.1276552],[-8.896806,12.1272376],[-8.8967361,12.126987],[-8.8957298,12.1263871],[-8.8940481,12.1257784],[-8.8935178,12.1252129],[-8.8933563,12.1237318],[-8.8932268,12.1232508],[-8.8929537,12.122674],[-8.8924149,12.1218958],[-8.8921489,12.1210314],[-8.8917124,12.120325],[-8.8919314,12.1195582],[-8.8918304,12.1190874],[-8.8915275,12.1187761],[-8.8912458,12.1186947],[-8.891281,12.1183636],[-8.8921023,12.1181838],[-8.8931031,12.1177028],[-8.8938637,12.1172533],[-8.8943862,12.1165358],[-8.8948931,12.1150523],[-8.8952478,12.1134324],[-8.8953151,12.1127996],[-8.8956967,12.1126278],[-8.8960399,12.1126101],[-8.8964516,12.1124202],[-8.8964294,12.1119875],[-8.8949319,12.1103643],[-8.8944095,12.1091685],[-8.8943396,12.1085249],[-8.8944457,12.1081308],[-8.8949138,12.1079247],[-8.8963584,12.1075526],[-8.8970651,12.1072185],[-8.8975742,12.1065125],[-8.8979505,12.105806],[-8.8981602,12.1048947],[-8.8980437,12.1045378],[-8.8977719,12.1044011],[-8.8970574,12.1048188],[-8.8968477,12.1050998],[-8.8965801,12.105089],[-8.8963693,12.1044749],[-8.8966039,12.1037806],[-8.8968793,12.1025491],[-8.898253,12.1012469],[-8.8987708,12.1005033],[-8.8997697,12.0997998],[-8.9010372,12.0987917],[-8.9026454,12.0985866],[-8.9036292,12.0988427],[-8.9044434,12.0994422],[-8.9047541,12.0998903],[-8.9060028,12.1011509],[-8.9067215,12.1019538],[-8.9071383,12.1019842],[-8.9085146,12.1010043],[-8.9084944,12.1006482],[-8.9073708,12.0998193],[-8.9065258,12.0993873],[-8.9058304,12.0980819],[-8.9058568,12.0977345],[-8.9064161,12.0975437],[-8.9072394,12.0975665],[-8.9083029,12.0970472],[-8.9088295,12.0964025],[-8.9113345,12.0946134],[-8.9115033,12.0941567],[-8.911946,12.0936617],[-8.9118373,12.0934732],[-8.9109829,12.0932985],[-8.9101156,12.0931059],[-8.9098407,12.0912214],[-8.9097609,12.0897261],[-8.9093493,12.0881035],[-8.9088036,12.0874142],[-8.9079761,12.0869344],[-8.9079476,12.0863557],[-8.9080709,12.0847074],[-8.9089247,12.0823405],[-8.9090801,12.0811702],[-8.9092758,12.0803555],[-8.9096315,12.0797792],[-8.9107106,12.0790087],[-8.9108489,12.078618],[-8.9114189,12.078313],[-8.9127936,12.0783465],[-8.9132247,12.0784455],[-8.9134059,12.0783113],[-8.9134061,12.078102],[-8.9125828,12.0772514],[-8.9123634,12.076833],[-8.9118901,12.0764961],[-8.9097318,12.0759],[-8.908941,12.0758409],[-8.9086764,12.0756392],[-8.9084504,12.075157],[-8.9091265,12.0751315],[-8.909984,12.0749984],[-8.910325,12.0747937],[-8.910292,12.0744232],[-8.9103195,12.0741171],[-8.9100523,12.0730073],[-8.9095433,12.0712365],[-8.9092516,12.0696171],[-8.9092649,12.0685927],[-8.9090508,12.0675157],[-8.9088427,12.0668738],[-8.9091253,12.0660535],[-8.9091882,12.0655781],[-8.909028,12.0652115],[-8.9086577,12.0644448],[-8.9086115,12.0640582],[-8.9086536,12.0638863],[-8.9094527,12.0634363],[-8.9096879,12.0636125],[-8.9099327,12.0642045],[-8.9102975,12.0646114],[-8.910638,12.0646705],[-8.9111871,12.0642164],[-8.9112256,12.0639293],[-8.9118407,12.0633547],[-8.9121867,12.0632204],[-8.9125365,12.0629397],[-8.9125766,12.0626028],[-8.9123514,12.0618026],[-8.9123741,12.0613889],[-8.9120604,12.0613085],[-8.9111048,12.06162],[-8.9097431,12.0614706],[-8.9081038,12.0615458],[-8.9073429,12.06133],[-8.9070299,12.0608263],[-8.9070889,12.0598888],[-8.906942,12.0592623],[-8.9065075,12.0583919],[-8.9063537,12.0574749],[-8.9065028,12.0570746],[-8.9067882,12.0566951],[-8.9073453,12.054753],[-8.9080513,12.0530103],[-8.9088505,12.0519279],[-8.9094353,12.0512599],[-8.9097763,12.0500442],[-8.9098691,12.0496218],[-8.9097373,12.0492727],[-8.9087653,12.0492297],[-8.9075986,12.0494707],[-8.9073381,12.0492733],[-8.9072739,12.0488545],[-8.9077085,12.0475788],[-8.90826,12.0468666],[-8.9082985,12.0463187],[-8.9080531,12.0454615],[-8.907288,12.0441757],[-8.9066564,12.0440361],[-8.9053976,12.0434821],[-8.9045418,12.043944],[-8.9035855,12.0447659],[-8.902519,12.0450384],[-8.9020335,12.0456223],[-8.9019499,12.0457226],[-8.9009006,12.0464549],[-8.9002082,12.0477533],[-8.8996984,12.0482289],[-8.8991094,12.0484705],[-8.8987149,12.0482181],[-8.8972362,12.0452668],[-8.8968205,12.0447075],[-8.8962494,12.0441704],[-8.8952422,12.0435722],[-8.8936396,12.042898],[-8.8924019,12.0430701],[-8.891131,12.0431714],[-8.8901961,12.0434471],[-8.8897391,12.0434698],[-8.8894385,12.0434847],[-8.8880302,12.0444719],[-8.8865703,12.0446167],[-8.8862715,12.0443524],[-8.8859906,12.0437998],[-8.8855713,12.0433534],[-8.8854977,12.0429036],[-8.8856282,12.0421938],[-8.8855623,12.0414312],[-8.8848593,12.0405879],[-8.8843896,12.0400127],[-8.8830527,12.0399226],[-8.8827461,12.0400193],[-8.8825038,12.0407818],[-8.8824271,12.0418897],[-8.8815713,12.0434512],[-8.8813267,12.044057],[-8.8809107,12.0442294],[-8.8804707,12.0440528],[-8.8803066,12.0436386],[-8.8802779,12.0423785],[-8.880043,12.0416729],[-8.8795545,12.0407754],[-8.8794707,12.0399818],[-8.8790819,12.0392666],[-8.8790435,12.0387671],[-8.8788048,12.0386081],[-8.8783735,12.0386167],[-8.8776815,12.0389981],[-8.876995,12.0398865],[-8.8766297,12.0398919],[-8.8754285,12.0390551],[-8.8753573,12.038701],[-8.8756437,12.0378709],[-8.8756519,12.0367315],[-8.8752877,12.0366825],[-8.8743777,12.0367825],[-8.8740759,12.0371706],[-8.8737154,12.0385188],[-8.8732753,12.0389496],[-8.8729372,12.0389767],[-8.8717535,12.0378199],[-8.8718058,12.0372697],[-8.8723427,12.0365566],[-8.8726798,12.0357416],[-8.8725614,12.0349678],[-8.8720896,12.0345989],[-8.8718545,12.0324459],[-8.8719787,12.0313856],[-8.8721563,12.0308484],[-8.8720022,12.0304026],[-8.8715806,12.0303101],[-8.8706543,12.0317067],[-8.8706035,12.032398],[-8.8703379,12.0328864],[-8.8697212,12.0330655],[-8.8676128,12.0325631],[-8.866515,12.0326521],[-8.8661448,12.0324328],[-8.8658911,12.031187],[-8.8660894,12.0303633],[-8.8660918,12.0298861],[-8.8658616,12.0293074],[-8.8663214,12.0290947],[-8.8671778,12.0294951],[-8.8675054,12.0299469],[-8.8678549,12.0298405],[-8.8680257,12.0292936],[-8.868274,12.0279855],[-8.8681166,12.0269209],[-8.8678696,12.0259996],[-8.8673423,12.0259741],[-8.8662546,12.0268472],[-8.8660142,12.0273186],[-8.8647074,12.0282318],[-8.864578,12.0285791],[-8.8647948,12.0290581],[-8.8640026,12.0298557],[-8.8626379,12.0303013],[-8.8626806,12.0305338],[-8.8627124,12.0307073],[-8.8634016,12.0326617],[-8.8635288,12.0334942],[-8.8634637,12.034244],[-8.8632027,12.0349602],[-8.8626352,12.03548],[-8.8607096,12.0357198],[-8.8594198,12.0354389],[-8.8577856,12.035441],[-8.8556151,12.0374692],[-8.8532384,12.0387834],[-8.8520894,12.0395931],[-8.8520076,12.0401803],[-8.8527475,12.0419199],[-8.8516094,12.0442215],[-8.8507059,12.0453905],[-8.8498608,12.0462881],[-8.8494518,12.0474784],[-8.849224,12.0476117],[-8.8490018,12.0475066],[-8.8486362,12.0457137],[-8.8482813,12.04525],[-8.8475256,12.0446612],[-8.8473563,12.0442781],[-8.847087,12.0442987],[-8.8464227,12.0450149],[-8.8449532,12.0461012],[-8.8433139,12.0463021],[-8.8430514,12.0460557],[-8.8432175,12.0454855],[-8.843466,12.0451893],[-8.8433185,12.044931],[-8.8428292,12.0445816],[-8.8426157,12.044385],[-8.8422544,12.0444145],[-8.8415943,12.0449386],[-8.8412577,12.0449456],[-8.8404057,12.0445256],[-8.8398838,12.0443562],[-8.8395464,12.0439965],[-8.8397295,12.0437412],[-8.8410489,12.0427113],[-8.8423155,12.0421433],[-8.8428856,12.0420543],[-8.8433749,12.041234],[-8.843538,12.040801],[-8.8433516,12.0399144],[-8.8425206,12.0398136],[-8.8416953,12.0398906],[-8.8407969,12.0394347],[-8.8403614,12.0391527],[-8.8401828,12.0387814],[-8.8405634,12.0377475],[-8.8408973,12.0373601],[-8.8409009,12.037146],[-8.8407342,12.0368816],[-8.8392353,12.0370183],[-8.8385694,12.0374715],[-8.8380039,12.0379576],[-8.837424,12.0391654],[-8.8357389,12.0397548],[-8.8345269,12.0407148],[-8.8337229,12.0410896],[-8.8329371,12.0420671],[-8.8320201,12.0417071],[-8.8314687,12.0421126],[-8.830478,12.0433575],[-8.8300421,12.0435077],[-8.8295252,12.0431787],[-8.828944,12.0441066],[-8.8281949,12.0450195],[-8.8281306,12.0455272],[-8.8283942,12.0465343],[-8.8281158,12.047246],[-8.8275048,12.047654],[-8.8265878,12.04745],[-8.8265571,12.0472539],[-8.826511,12.0469573],[-8.8269093,12.0460341],[-8.8267511,12.04448],[-8.8260811,12.0427155],[-8.824865,12.0416856],[-8.824607,12.0412143],[-8.8250297,12.0409525],[-8.8266967,12.0408197],[-8.8284523,12.0396984],[-8.8287008,12.0390822],[-8.8286861,12.0380158],[-8.828279,12.0378602],[-8.8268844,12.0378389],[-8.8261118,12.0362785],[-8.824484,12.0346472],[-8.8244341,12.0346225],[-8.8219025,12.0333662],[-8.821857,12.0330237],[-8.822323,12.0328049],[-8.8238629,12.0327728],[-8.8241634,12.0323595],[-8.8238959,12.0311908],[-8.8219872,12.030322],[-8.8202684,12.0287915],[-8.818731,12.0287014],[-8.817837,12.0286372],[-8.817579,12.0282667],[-8.817576,12.0275287],[-8.8171354,12.0272672],[-8.8169231,12.026858],[-8.8170251,12.026247],[-8.8167201,12.025839],[-8.8159051,12.025534],[-8.8150901,12.02533],[-8.8145801,12.024922],[-8.8140711,12.023598],[-8.8137651,12.023089],[-8.8131541,12.022478],[-8.8124411,12.022274],[-8.8116261,12.022681],[-8.8108111,12.023191],[-8.8103021,12.023293],[-8.8097931,12.023089],[-8.8093851,12.022376],[-8.8092841,12.02095],[-8.8088761,12.020135],[-8.8080611,12.019829],[-8.8073481,12.019829],[-8.8065331,12.020135],[-8.8059221,12.02044],[-8.8049031,12.02044],[-8.8041901,12.019524],[-8.8047001,12.018607],[-8.8047001,12.01769],[-8.8043941,12.016671],[-8.8035791,12.016468],[-8.8025611,12.01657],[-8.8014401,12.016468],[-8.8007271,12.01606],[-8.7997081,12.015144],[-8.7989951,12.014838],[-8.7989951,12.014329],[-8.7991991,12.013616],[-8.7991991,12.012699],[-8.7993011,12.011273],[-8.7996071,12.010254],[-8.8002181,12.009337],[-8.8013381,12.007911],[-8.8016441,12.006995],[-8.8013381,12.006383],[-8.8007271,12.00618],[-8.7994031,12.005874],[-8.7983841,12.005365],[-8.7975691,12.004448],[-8.7978751,12.003633],[-8.7978751,12.002716],[-8.7972641,12.002309],[-8.7961431,12.002716],[-8.7951251,12.003226],[-8.7945131,12.003327],[-8.7935971,12.003022],[-8.7929851,12.002716],[-8.7918651,12.0018],[-8.7914711,12.000429],[-8.7913131,11.999377],[-8.7913131,11.998851],[-8.7917341,11.99822],[-8.7925751,11.997642],[-8.7929431,11.997011],[-8.7928911,11.995854],[-8.7925751,11.995223],[-8.7917341,11.994066],[-8.7910501,11.992751],[-8.7904721,11.991804],[-8.7899981,11.99091],[-8.7892621,11.990122],[-8.7883161,11.989438],[-8.7870531,11.988912],[-8.7858961,11.988491],[-8.7851601,11.988018],[-8.7845291,11.98744],[-8.7840561,11.987071],[-8.7834771,11.986808],[-8.7830041,11.986756],[-8.7827411,11.987071],[-8.7824261,11.987702],[-8.7825831,11.988859],[-8.7815841,11.988912],[-8.7805851,11.988439],[-8.7801121,11.987913],[-8.7796381,11.987229],[-8.7794281,11.986335],[-8.7792701,11.985126],[-8.7796381,11.983443],[-8.7795331,11.982654],[-8.7793231,11.981812],[-8.7786921,11.982022],[-8.7785871,11.982864],[-8.7781661,11.983179],[-8.7776931,11.983232],[-8.7770091,11.982811],[-8.7765881,11.982128],[-8.7759051,11.979025],[-8.7756421,11.978394],[-8.7744321,11.977973],[-8.7736431,11.977868],[-8.7728551,11.9775],[-8.7722231,11.976816],[-8.7722231,11.975554],[-8.7723811,11.973766],[-8.7727491,11.972189],[-8.7731171,11.971452],[-8.7749051,11.970506],[-8.7768511,11.96714],[-8.7786147,11.9632771],[-8.7753533,11.9604852],[-8.7732504,11.9576302],[-8.771448,11.9546704],[-8.7708472,11.9537887],[-8.7756134,11.9502095],[-8.7766903,11.9482689],[-8.7777377,11.9468689],[-8.7785204,11.9460934],[-8.7788131,11.9458381],[-8.7790426,11.945637],[-8.7792769,11.9444508],[-8.7807951,11.943791],[-8.7810061,11.942423],[-8.7816371,11.940898],[-8.7822151,11.93932],[-8.7824781,11.938217],[-8.7823201,11.936849],[-8.7817421,11.935693],[-8.7815321,11.934746],[-8.7815841,11.933484],[-8.7820051,11.929592],[-8.7827411,11.92507],[-8.7840031,11.920336],[-8.7860541,11.913815],[-8.7877371,11.910239],[-8.7902091,11.902088],[-8.7921021,11.896356],[-8.7928911,11.892359],[-8.7931541,11.887784],[-8.7934171,11.881841],[-8.7932061,11.879422],[-8.7925751,11.876477],[-8.7908401,11.872323],[-8.7884522,11.8676187],[-8.788285,11.8673349],[-8.7882844,11.866178],[-8.7890525,11.8642813],[-8.7906821,11.861279],[-8.7939951,11.85581],[-8.7972442,11.8350281],[-8.7984705,11.8286945],[-8.8144136,11.8249949],[-8.8218671,11.818946],[-8.8233391,11.816632],[-8.8244441,11.813529],[-8.8251271,11.810163],[-8.8255481,11.808639],[-8.8266001,11.807324],[-8.8282831,11.806114],[-8.8290711,11.805168],[-8.8300711,11.802749],[-8.8307021,11.800488],[-8.8306491,11.79891],[-8.8301231,11.796806],[-8.8284401,11.793967],[-8.8259691,11.791232],[-8.8234441,11.787971],[-8.8216041,11.785973],[-8.8202891,11.784237],[-8.8197631,11.782765],[-8.8197631,11.781135],[-8.8203421,11.7784],[-8.8220251,11.771879],[-8.8224451,11.770512],[-8.8260741,11.754314],[-8.8294921,11.738538],[-8.8366441,11.709404],[-8.8394311,11.697519],[-8.8488368,11.6547225],[-8.8478981,11.6543123],[-8.8460834,11.6544552],[-8.8445899,11.6543492],[-8.8435925,11.6539992],[-8.8421899,11.6543149],[-8.8405363,11.6547857],[-8.8395562,11.6548616],[-8.838418,11.6546309],[-8.837254,11.6542639],[-8.8358052,11.6532759],[-8.8354557,11.6529242],[-8.8351838,11.652953],[-8.8349899,11.6532826],[-8.83514,11.6542143],[-8.834889,11.6544903],[-8.834268,11.6543931],[-8.8339588,11.653889],[-8.833332,11.6533344],[-8.8326926,11.6530033],[-8.8318229,11.6528085],[-8.8315968,11.6525712],[-8.8312321,11.6517364],[-8.8312059,11.651283],[-8.8312868,11.6504061],[-8.8311409,11.6498306],[-8.8299092,11.6499319],[-8.8287522,11.6497739],[-8.8281764,11.6495773],[-8.8278656,11.6495852],[-8.8269642,11.6499319],[-8.8261232,11.6504049],[-8.8250712,11.6505099],[-8.8242538,11.6504465],[-8.8236008,11.6498884],[-8.8228029,11.6492083],[-8.8224306,11.6491049],[-8.8214013,11.649644],[-8.821006,11.6502246],[-8.8210396,11.6509234],[-8.8211808,11.6516237],[-8.8209367,11.6527137],[-8.8206627,11.6530771],[-8.8203382,11.6530068],[-8.8200768,11.6523843],[-8.8192804,11.6510094],[-8.818789,11.6507785],[-8.8182609,11.6507958],[-8.8175779,11.6510461],[-8.8166162,11.6511655],[-8.8161175,11.6509051],[-8.8154561,11.6499849],[-8.8155887,11.6497241],[-8.8159046,11.6489972],[-8.8158162,11.6482489],[-8.8155002,11.6477229],[-8.8141314,11.6468712],[-8.8136418,11.6462402],[-8.8134163,11.6458754],[-8.8135836,11.6452608],[-8.8140441,11.6446705],[-8.8139917,11.6444642],[-8.813867,11.6443319],[-8.8135888,11.6443472],[-8.8118008,11.6440842],[-8.8094702,11.6430965],[-8.80812,11.6427237],[-8.8065688,11.6427301],[-8.8054491,11.6428001],[-8.8050876,11.6427368],[-8.80481,11.6423675],[-8.804597,11.6417568],[-8.8044359,11.6414361],[-8.8038955,11.6411155],[-8.8035644,11.6405861],[-8.8030778,11.6405165],[-8.8012444,11.6412415],[-8.8007796,11.6411036],[-8.8004244,11.6411562],[-8.8001386,11.6413343],[-8.7998736,11.641314],[-8.7997229,11.6408],[-8.7995151,11.6405964],[-8.798527,11.6402536],[-8.7977322,11.6401434],[-8.797036,11.6397371],[-8.7959326,11.6395287],[-8.7957792,11.6392569],[-8.7956447,11.63833],[-8.7961135,11.6375008],[-8.7971382,11.6366941],[-8.797543,11.6363467],[-8.7974032,11.6358984],[-8.7968149,11.6356654],[-8.7958159,11.6354544],[-8.7947523,11.6350929],[-8.7933812,11.6344631],[-8.7919191,11.6328728],[-8.7912929,11.6320364],[-8.7910299,11.6311424],[-8.7906099,11.6306164],[-8.7900529,11.6301116],[-8.7895117,11.63027],[-8.7883479,11.6306164],[-8.7880265,11.6308385],[-8.7873058,11.6310279],[-8.7861747,11.6304786],[-8.7845291,11.630258],[-8.7832151,11.630101],[-8.7822681,11.629838],[-8.780857,11.6301191],[-8.7802061,11.629929],[-8.7792228,11.6297232],[-8.7778936,11.6298662],[-8.7774976,11.6299149],[-8.7767771,11.6296389],[-8.7763785,11.629115],[-8.7757523,11.6283596],[-8.7752956,11.6280192],[-8.7749697,11.6273165],[-8.7746294,11.6268817],[-8.7745214,11.6266184],[-8.7744553,11.6260497],[-8.7741172,11.625913],[-8.7733281,11.626051],[-8.7723169,11.6264672],[-8.7714938,11.6267767],[-8.7708188,11.6271886],[-8.770087,11.6274898],[-8.7694583,11.6279787],[-8.7689953,11.6284538],[-8.7680732,11.6291459],[-8.7677975,11.6297206],[-8.7670259,11.6305339],[-8.7664233,11.6309874],[-8.7659898,11.6315272],[-8.7649095,11.6328371],[-8.7642384,11.6333043],[-8.763706,11.6333172],[-8.7629939,11.6334629],[-8.7618598,11.6338616],[-8.760626,11.6339179],[-8.7595054,11.6333864],[-8.7591698,11.6332307],[-8.7590139,11.632966],[-8.759149,11.6320296],[-8.7590416,11.6316173],[-8.7589343,11.6306049],[-8.7589463,11.6298207],[-8.7587815,11.6294118],[-8.7587627,11.6288778],[-8.7583417,11.6279461],[-8.7583088,11.6274825],[-8.7581425,11.6270652],[-8.7579295,11.626943],[-8.7574618,11.6269583],[-8.7571293,11.626882],[-8.7566564,11.6265715],[-8.7562823,11.62592],[-8.7557835,11.6257775],[-8.7552017,11.6254146],[-8.7544303,11.62581],[-8.754235,11.6260625],[-8.7543337,11.6265359],[-8.7542108,11.6267115],[-8.7534764,11.626826],[-8.7521664,11.627364],[-8.7515228,11.6273286],[-8.7509456,11.6273878],[-8.7507888,11.6273285],[-8.7507369,11.6270994],[-8.7514384,11.6264531],[-8.751667,11.6261731],[-8.7517239,11.62597],[-8.7512044,11.6251047],[-8.7512461,11.6246361],[-8.7514923,11.6243053],[-8.7519975,11.6240055],[-8.7522542,11.6236792],[-8.7521606,11.6234807],[-8.7514333,11.623403],[-8.7507784,11.6235622],[-8.7503368,11.6236996],[-8.7498784,11.6236224],[-8.7492337,11.6231826],[-8.7490897,11.6228293],[-8.7490952,11.6226528],[-8.749786,11.6221167],[-8.7498675,11.6218338],[-8.7498068,11.621679],[-8.7489442,11.621735],[-8.7484817,11.6215314],[-8.7477403,11.6204474],[-8.7487512,11.6205113],[-8.7494111,11.6205215],[-8.7499203,11.6204045],[-8.7501905,11.6199922],[-8.7505179,11.6203586],[-8.7505023,11.6211017],[-8.7503048,11.6216158],[-8.7504829,11.6217063],[-8.7518533,11.6209236],[-8.7526501,11.6206851],[-8.7529965,11.6204604],[-8.7530328,11.6200431],[-8.7528562,11.6199922],[-8.7525808,11.6197072],[-8.7523729,11.6196257],[-8.7520664,11.6196919],[-8.7520664,11.6200736],[-8.7518168,11.6202762],[-8.7513179,11.6200982],[-8.7507356,11.6195739],[-8.7504549,11.6192225],[-8.7505599,11.6189518],[-8.7508988,11.6186899],[-8.7513461,11.618636],[-8.7523469,11.6186485],[-8.7530952,11.6188928],[-8.7532875,11.618903],[-8.7533238,11.6186434],[-8.7531482,11.6180561],[-8.7531731,11.6173812],[-8.7529289,11.6170809],[-8.7526691,11.6170605],[-8.7519063,11.6177],[-8.7516143,11.617768],[-8.7511174,11.6174388],[-8.7507315,11.6164933],[-8.7507095,11.6161015],[-8.7507933,11.6149228],[-8.75059,11.6143487],[-8.750192,11.614086],[-8.7498705,11.613995],[-8.7495141,11.6134588],[-8.7493635,11.6133868],[-8.7492753,11.6134408],[-8.7491724,11.6138367],[-8.7489556,11.6138906],[-8.7487619,11.6137693],[-8.7484645,11.613127],[-8.7457671,11.6103127],[-8.7365691,11.618058],[-8.7110101,11.637358],[-8.7012811,11.645562],[-8.6942351,11.638568],[-8.6931301,11.637936],[-8.6914481,11.637673],[-8.6905541,11.637253],[-8.6895021,11.636622],[-8.6888181,11.635517],[-8.6883451,11.634308],[-8.6881341,11.632888],[-8.6885551,11.63131],[-8.6888711,11.630416],[-8.6888181,11.629154],[-8.6886081,11.628418],[-8.6889761,11.627524],[-8.6900801,11.627156],[-8.6904481,11.626051],[-8.6903431,11.624473],[-8.6903961,11.623527],[-8.6898701,11.623316],[-8.6892911,11.623001],[-8.6898171,11.62258],[-8.6899751,11.622054],[-8.6893441,11.621634],[-8.6889231,11.621213],[-8.6887131,11.620845],[-8.6892391,11.620161],[-8.6889761,11.619373],[-8.6885551,11.618952],[-8.6888181,11.616743],[-8.6885551,11.616165],[-8.6876611,11.615586],[-8.6871881,11.615166],[-8.6876091,11.61443],[-8.6876091,11.613904],[-8.6873981,11.613798],[-8.6866621,11.614272],[-8.6862941,11.613851],[-8.6860841,11.612957],[-8.6857681,11.612221],[-8.6856101,11.611695],[-8.6854001,11.611379],[-8.6847161,11.611169],[-8.6843481,11.610959],[-8.6848741,11.610696],[-8.6850321,11.609697],[-8.6843481,11.608487],[-8.6836641,11.60754],[-8.6830331,11.60754],[-8.6824551,11.607067],[-8.6824021,11.606226],[-8.6820341,11.60549],[-8.6812981,11.605332],[-8.6808771,11.604858],[-8.6803511,11.603333],[-8.6796681,11.602124],[-8.6793001,11.601914],[-8.6790891,11.60123],[-8.6793001,11.600441],[-8.6796151,11.599757],[-8.6797731,11.599231],[-8.6794051,11.598916],[-8.6788261,11.598653],[-8.6787741,11.597706],[-8.6788791,11.597023],[-8.6783001,11.595813],[-8.6761441,11.593972],[-8.6719901,11.591501],[-8.6712035,11.5909639],[-8.6665211,11.587767],[-8.6644691,11.586872],[-8.6640491,11.585926],[-8.6632601,11.585663],[-8.6628921,11.585926],[-8.6622611,11.585716],[-8.6614721,11.585084],[-8.6614721,11.58398],[-8.6609991,11.583454],[-8.6604201,11.583086],[-8.6598941,11.582402],[-8.6581061,11.579089],[-8.6567391,11.575934],[-8.6550041,11.573673],[-8.6548981,11.572411],[-8.6561081,11.570938],[-8.6573701,11.56915],[-8.6582111,11.568099],[-8.6582641,11.566836],[-8.6574231,11.563892],[-8.6558981,11.562682],[-8.6537411,11.561157],[-8.6530051,11.560316],[-8.6516911,11.558475],[-8.6487981,11.555582],[-8.6443055,11.5522818],[-8.6436441,11.551796],[-8.6418181,11.550508],[-8.6413441,11.549798],[-8.6412651,11.548983],[-8.6414231,11.547905],[-8.6420281,11.547195],[-8.6447631,11.545407],[-8.6475241,11.543198],[-8.6508631,11.541358],[-8.6558851,11.538123],[-8.6564111,11.537519],[-8.6563321,11.536967],[-8.6560691,11.536441],[-8.6551153,11.5350662],[-8.6547551,11.534547],[-8.6531511,11.53297],[-8.6524097,11.5326062],[-8.6517571,11.532286],[-8.6505211,11.531497],[-8.6495751,11.530182],[-8.6491541,11.528684],[-8.6494961,11.527606],[-8.649924,11.5271393],[-8.6512571,11.525686],[-8.6542551,11.523583],[-8.6548331,11.523031],[-8.6547281,11.522426],[-8.6540181,11.52169],[-8.6519941,11.52119],[-8.6508891,11.520454],[-8.6496531,11.519271],[-8.6489701,11.518061],[-8.6485481,11.517088],[-8.6479441,11.516194],[-8.6472861,11.515747],[-8.6463661,11.515431],[-8.6451301,11.5153],[-8.6443941,11.514879],[-8.6430531,11.513643],[-8.6419751,11.513039],[-8.6414231,11.512618],[-8.6411071,11.511987],[-8.6405291,11.511356],[-8.6393191,11.510357],[-8.6385741,11.509276],[-8.6385041,11.508332],[-8.6380831,11.507333],[-8.6375841,11.505098],[-8.6374001,11.503494],[-8.6351391,11.501732],[-8.6339821,11.50118],[-8.6331401,11.500944],[-8.6325621,11.50047],[-8.6317201,11.500234],[-8.6301691,11.500128],[-8.6293281,11.499918],[-8.6283281,11.499366],[-8.6266461,11.498209],[-8.6253311,11.496973],[-8.6240951,11.495895],[-8.6223861,11.494107],[-8.6220701,11.493423],[-8.6219131,11.492371],[-8.6211501,11.491714],[-8.6202031,11.490583],[-8.6195721,11.489531],[-8.6186781,11.488585],[-8.6177841,11.487533],[-8.6170481,11.487007],[-8.6167591,11.486481],[-8.6161801,11.484194],[-8.6157601,11.483195],[-8.6155761,11.481985],[-8.6156501,11.481119],[-8.6161801,11.480513],[-8.6163911,11.47975],[-8.6164701,11.479119],[-8.6162591,11.478541],[-8.6157331,11.478094],[-8.6154181,11.477568],[-8.6154711,11.476779],[-8.6149321,11.476332],[-8.6130911,11.475911],[-8.6117241,11.47528],[-8.6104091,11.475122],[-8.6098831,11.475122],[-8.6089891,11.474912],[-8.6083581,11.474491],[-8.6076221,11.474544],[-8.6070441,11.474912],[-8.6059921,11.474754],[-8.6046251,11.474333],[-8.6034681,11.473808],[-8.6026791,11.473702],[-8.6021001,11.474018],[-8.6017321,11.474439],[-8.6014691,11.474544],[-8.6011011,11.47507],[-8.6010491,11.47528],[-8.6005751,11.475227],[-8.5997871,11.474596],[-8.5989981,11.474807],[-8.5984721,11.474859],[-8.5978931,11.474596],[-8.5971041,11.474491],[-8.5964731,11.474544],[-8.5955271,11.474491],[-8.5952111,11.474281],[-8.5943701,11.474123],[-8.5941601,11.473808],[-8.5934761,11.473124],[-8.5917401,11.472598],[-8.5911091,11.472545],[-8.5900581,11.472177],[-8.5884801,11.47223],[-8.5861131,11.471389],[-8.5847981,11.470495],[-8.5844301,11.470179],[-8.5844821,11.468969],[-8.5841141,11.468654],[-8.5833251,11.468444],[-8.5824311,11.468549],[-8.5818531,11.468917],[-8.5809061,11.469022],[-8.5796971,11.468759],[-8.5791711,11.468338],[-8.5781191,11.468128],[-8.5770671,11.468075],[-8.5762791,11.467655],[-8.5755421,11.467076],[-8.5742281,11.467129],[-8.5739651,11.466813],[-8.5736491,11.466025],[-8.5732811,11.465446],[-8.5726501,11.465183],[-8.5722291,11.464815],[-8.5724401,11.464289],[-8.5725451,11.463711],[-8.5721241,11.46308],[-8.5713881,11.462974],[-8.5707041,11.463343],[-8.5699151,11.462974],[-8.5685481,11.462186],[-8.5680221,11.462554],[-8.5678121,11.462974],[-8.5673911,11.462764],[-8.5671811,11.462343],[-8.5665501,11.462186],[-8.5658141,11.462343],[-8.5647091,11.462764],[-8.5639731,11.463448],[-8.5637101,11.463921],[-8.5640261,11.464552],[-8.5645511,11.464605],[-8.5648671,11.465183],[-8.5647621,11.465709],[-8.5635521,11.465762],[-8.5623951,11.465919],[-8.5623951,11.466393],[-8.5628161,11.466813],[-8.5631841,11.467444],[-8.5632891,11.468181],[-8.5627631,11.468549],[-8.5619751,11.468812],[-8.5613441,11.469495],[-8.5610487,11.4701771],[-8.5620114,11.4703426],[-8.5623755,11.470531],[-8.5625576,11.4709108],[-8.562422,11.4713546],[-8.5620759,11.4716079],[-8.5611689,11.4718657],[-8.5608299,11.4723758],[-8.560263,11.4736339],[-8.5598177,11.4762679],[-8.5594292,11.4774183],[-8.5591458,11.4777912],[-8.5588948,11.4778309],[-8.5577534,11.4774262],[-8.5566543,11.4769474],[-8.5553811,11.4764923],[-8.5540763,11.4758639],[-8.5536525,11.475536],[-8.552922,11.474607],[-8.5527993,11.4742955],[-8.5525372,11.4738965],[-8.5520744,11.4737107],[-8.5515837,11.4738419],[-8.5511097,11.4743446],[-8.5508811,11.4747982],[-8.5512045,11.4754157],[-8.5512658,11.4761972],[-8.551093,11.4766781],[-8.5505186,11.4774869],[-8.5501673,11.477853],[-8.5493811,11.4788367],[-8.5489796,11.4796618],[-8.5485279,11.4800444],[-8.5473346,11.480569],[-8.5464257,11.4808204],[-8.545432,11.4809725],[-8.5449471,11.4808694],[-8.5446357,11.4805799],[-8.5440558,11.4789186],[-8.5432918,11.4780552],[-8.5426951,11.4776672],[-8.5412821,11.4772449],[-8.5407825,11.4773721],[-8.5405204,11.4777547],[-8.5404368,11.4784487],[-8.5398847,11.4799405],[-8.5394944,11.4801373],[-8.5385117,11.4799801],[-8.5374423,11.4793504],[-8.5369628,11.4793012],[-8.5363565,11.479441],[-8.5361877,11.4797875],[-8.5360037,11.4810553],[-8.5359758,11.4819078],[-8.5358587,11.4822794],[-8.5352899,11.4828204],[-8.5342583,11.4842576],[-8.5332824,11.4858041],[-8.5330761,11.4863997],[-8.5328921,11.487673],[-8.5330681,11.4900137],[-8.5332392,11.4914194],[-8.5331223,11.4924855],[-8.5329245,11.4929568],[-8.532439,11.4934414],[-8.5318321,11.4938599],[-8.5313376,11.4940141],[-8.5298811,11.4935295],[-8.5292287,11.4935616],[-8.5291601,11.49274],[-8.5293181,11.492371],[-8.5291601,11.492109],[-8.5294231,11.491583],[-8.5296331,11.490741],[-8.5284761,11.488848],[-8.5283191,11.488217],[-8.5277401,11.488164],[-8.5274251,11.488638],[-8.5270561,11.488638],[-8.5260571,11.487744],[-8.5248481,11.487533],[-8.5242171,11.486902],[-8.5233231,11.48564],[-8.5223761,11.484746],[-8.5207461,11.484115],[-8.5202201,11.4838],[-8.5204301,11.483169],[-8.5207461,11.482695],[-8.5210091,11.481906],[-8.5206411,11.480487],[-8.5183791,11.476858],[-8.5174851,11.476174],[-8.5171171,11.475543],[-8.5167491,11.474754],[-8.5162761,11.473335],[-8.5163281,11.472335],[-8.5162761,11.471494],[-8.5160131,11.470968],[-8.5160651,11.470232],[-8.5164341,11.46939],[-8.5168021,11.468023],[-8.5169591,11.467234],[-8.5167491,11.466183],[-8.5165911,11.464763],[-8.5167491,11.463816],[-8.5165911,11.462659],[-8.5164331,11.462185],[-8.5146981,11.460818],[-8.5133831,11.460082],[-8.5129631,11.459608],[-8.5126471,11.458977],[-8.5123841,11.45782],[-8.5118581,11.457084],[-8.5112271,11.45577],[-8.5113851,11.45335],[-8.5115951,11.452351],[-8.5121211,11.451615],[-8.5133311,11.450669],[-8.5135941,11.450143],[-8.5139091,11.449249],[-8.5135941,11.448723],[-8.5133311,11.448144],[-8.5132781,11.447198],[-8.5130681,11.446514],[-8.5122791,11.446146],[-8.5119111,11.445567],[-8.5117531,11.444884],[-8.5114371,11.444358],[-8.5093871,11.442623],[-8.5077561,11.440519],[-8.5057051,11.437995],[-8.5056001,11.436996],[-8.5051791,11.436207],[-8.5048641,11.435103],[-8.5037601,11.432841],[-8.5039701,11.43221],[-8.5043381,11.431737],[-8.5045481,11.431053],[-8.5050221,11.430369],[-8.5050741,11.429896],[-8.5048641,11.429265],[-8.5043911,11.428213],[-8.5039701,11.42753],[-8.5034971,11.426951],[-8.5035491,11.426373],[-8.5035491,11.425373],[-8.5032861,11.424427],[-8.5029711,11.423533],[-8.5021821,11.422323],[-8.5021821,11.421902],[-8.5029181,11.421219],[-8.5027081,11.420588],[-8.5020771,11.42022],[-8.5013411,11.42022],[-8.5007101,11.419537],[-8.5006051,11.4188],[-8.4998161,11.418169],[-8.4981331,11.416539],[-8.4973441,11.416224],[-8.4968711,11.416434],[-8.4962401,11.416802],[-8.4949251,11.416802],[-8.4939261,11.416118],[-8.4922961,11.415803],[-8.4905081,11.415803],[-8.4891401,11.415487],[-8.4879831,11.415277],[-8.4864061,11.415382],[-8.4848281,11.415172],[-8.4824621,11.414067],[-8.4817781,11.413594],[-8.4811991,11.413436],[-8.4799901,11.413752],[-8.4785171,11.414541],[-8.4772031,11.416066],[-8.4756251,11.417696],[-8.4745211,11.419431],[-8.4738371,11.421167],[-8.4737321,11.422797],[-8.4739421,11.424375],[-8.4747311,11.425532],[-8.4753091,11.426478],[-8.4758351,11.427477],[-8.4756251,11.428161],[-8.4750991,11.428582],[-8.4736791,11.428529],[-8.4724171,11.427793],[-8.4712081,11.426478],[-8.4709451,11.425584],[-8.4708391,11.424532],[-8.4710501,11.422587],[-8.4724701,11.420168],[-8.4730481,11.418432],[-8.4730481,11.417749],[-8.4722071,11.417012],[-8.4696301,11.416381],[-8.4680521,11.416434],[-8.4663691,11.415855],[-8.4644241,11.413752],[-8.4629511,11.412911],[-8.4613731,11.412595],[-8.4592171,11.412911],[-8.4576401,11.413331],[-8.4544851,11.414646],[-8.4519601,11.41533],[-8.4494361,11.415067],[-8.4475431,11.41391],[-8.4458601,11.412437],[-8.4426001,11.406915],[-8.4409171,11.404181],[-8.4390761,11.402287],[-8.4372881,11.40113],[-8.4357631,11.400552],[-8.4343431,11.400552],[-8.4331341,11.401183],[-8.4306091,11.403287],[-8.4277171,11.403497],[-8.4246671,11.403444],[-8.4215641,11.403129],[-8.4188821,11.402603],[-8.4154641,11.402077],[-8.4130971,11.401604],[-8.4103101,11.400762],[-8.4085221,11.400131],[-8.4069441,11.398974],[-8.4057871,11.397923],[-8.4039471,11.395766],[-8.4020011,11.394294],[-8.4003711,11.393242],[-8.3980571,11.391927],[-8.3960581,11.390981],[-8.3924821,11.389771],[-8.3896431,11.38914],[-8.3858561,11.388614],[-8.3835421,11.388509],[-8.3798611,11.388509],[-8.3771791,11.388456],[-8.3741821,11.388772],[-8.3720261,11.388719],[-8.3699221,11.388141],[-8.3678711,11.387142],[-8.3631911,11.382514],[-8.3559341,11.378044],[-8.3532521,11.376835],[-8.3527261,11.376309],[-8.3529361,11.375678],[-8.3538301,11.374678],[-8.3549341,11.37431],[-8.3583531,11.373784],[-8.3710791,11.373101],[-8.3810711,11.371996],[-8.3844891,11.371155],[-8.3885911,11.369577],[-8.3934821,11.366843],[-8.3977941,11.363582],[-8.4005811,11.361058],[-8.4028951,11.35906],[-8.4046831,11.356956],[-8.4059981,11.354853],[-8.4069451,11.352539],[-8.4076811,11.350435],[-8.4081541,11.34849],[-8.4084171,11.345965],[-8.4084171,11.34402],[-8.4083121,11.341495],[-8.4076281,11.338445],[-8.4051561,11.33408],[-8.4037881,11.332239],[-8.4022631,11.33124],[-8.3979511,11.329242],[-8.3944801,11.32819],[-8.3885901,11.32677],[-8.3849091,11.325981],[-8.3814381,11.325456],[-8.3755491,11.325245],[-8.3691331,11.325087],[-8.3647161,11.32514],[-8.3618761,11.325561],[-8.3601411,11.326192],[-8.3586681,11.326823],[-8.3569861,11.327401],[-8.3559341,11.327191],[-8.3545921,11.325982],[-8.3538561,11.322511],[-8.3536461,11.320092],[-8.3534351,11.315359],[-8.3562751,11.304736],[-8.3585891,11.298109],[-8.3615081,11.292009],[-8.3624551,11.28917],[-8.3639801,11.286435],[-8.3656101,11.284279],[-8.3671351,11.282912],[-8.3688711,11.281492],[-8.3719731,11.280072],[-8.3785991,11.277916],[-8.3849101,11.276654],[-8.3908521,11.276233],[-8.4032101,11.276917],[-8.4133601,11.278757],[-8.4231941,11.281124],[-8.4279801,11.282754],[-8.4326081,11.285068],[-8.4382341,11.287802],[-8.4426001,11.289854],[-8.4467541,11.290853],[-8.4518031,11.291536],[-8.4567981,11.291536],[-8.4605851,11.291063],[-8.4655281,11.290169],[-8.4696831,11.288907],[-8.4732591,11.287434],[-8.4769921,11.284174],[-8.4784651,11.282123],[-8.4802531,11.278179],[-8.4818831,11.27476],[-8.4831451,11.271921],[-8.4835131,11.269449],[-8.4837241,11.26703],[-8.4837241,11.26419],[-8.4831451,11.261876],[-8.4814101,11.258826],[-8.4806211,11.256617],[-8.4805161,11.254566],[-8.4805161,11.252673],[-8.4800431,11.250675],[-8.4793591,11.248624],[-8.4789381,11.247046],[-8.4775711,11.244732],[-8.4764671,11.243155],[-8.4753621,11.241367],[-8.4741531,11.239526],[-8.4729961,11.237054],[-8.4728381,11.235266],[-8.4735741,11.231691],[-8.4765191,11.228588],[-8.4793591,11.22701],[-8.4821991,11.226011],[-8.4860901,11.224749],[-8.4880891,11.224276],[-8.4899291,11.224171],[-8.4920851,11.224539],[-8.4938731,11.22517],[-8.4955561,11.225433],[-8.4974491,11.22559],[-8.5002361,11.225696],[-8.5030231,11.225432],[-8.5050221,11.224801],[-8.5064421,11.22417],[-8.5079671,11.222698],[-8.5093871,11.220962],[-8.5115431,11.218596],[-8.5128051,11.217544],[-8.5144881,11.216755],[-8.5171171,11.216229],[-8.5207461,11.216019],[-8.5256891,11.216019],[-8.5292651,11.216387],[-8.5352601,11.217807],[-8.5404141,11.217649],[-8.5427281,11.216808],[-8.5465671,11.214967],[-8.5489861,11.213495],[-8.5506161,11.211549],[-8.5528251,11.205659],[-8.5555071,11.196245],[-8.5560321,11.193669],[-8.5562951,11.190566],[-8.5559271,11.186411],[-8.5553491,11.182888],[-8.5555071,11.181574],[-8.5556121,11.179996],[-8.5554541,11.178366],[-8.5548231,11.17663],[-8.5534031,11.174842],[-8.5519831,11.172213],[-8.5509841,11.169951],[-8.5500371,11.167322],[-8.5496171,11.165639],[-8.5491431,11.164062],[-8.5493011,11.162379],[-8.5497741,11.160328],[-8.5512471,11.157962],[-8.5529821,11.15428],[-8.5556641,11.148075],[-8.5580831,11.142185],[-8.5588894,11.1399493],[-8.5592401,11.137925],[-8.5609761,11.136505],[-8.5639281,11.1351731],[-8.5705097,11.1342379],[-8.574318,11.1348074],[-8.5818236,11.137117],[-8.5880624,11.1380545],[-8.5960599,11.1376291],[-8.5985264,11.136405],[-8.6009636,11.1343093],[-8.6043081,11.130352],[-8.6052551,11.127407],[-8.6058861,11.123884],[-8.6060961,11.119256],[-8.6058341,11.115995],[-8.6053081,11.113261],[-8.6038351,11.108634],[-8.6027311,11.106215],[-8.6016261,11.104847],[-8.6003121,11.103375],[-8.5997331,11.102428],[-8.5991551,11.101219],[-8.5990501,11.099746],[-8.5995231,11.098326],[-8.6009591,11.095749],[-8.6030261,11.093737],[-8.6055281,11.091725],[-8.6087261,11.089439],[-8.6133601,11.085905],[-8.6223471,11.078237],[-8.6251341,11.075345],[-8.6270121,11.072471],[-8.6278161,11.070559],[-8.6288671,11.067194],[-8.6297611,11.063828],[-8.6303401,11.06083],[-8.6303851,11.058548],[-8.6302871,11.053573],[-8.6300581,11.050553],[-8.6302211,11.048812],[-8.6304931,11.047289],[-8.6314721,11.044298],[-8.6332321,11.040742],[-8.6345181,11.038968],[-8.6367031,11.037113],[-8.6411731,11.034011],[-8.6463801,11.030487],[-8.6526381,11.026596],[-8.6569261,11.02363],[-8.659863,11.021019],[-8.662528,11.018354],[-8.667678,11.012081],[-8.6723061,11.007295],[-8.6752011,11.003561],[-8.6759351,11.002089],[-8.6765661,11.000406],[-8.6767241,10.998829],[-8.6764081,10.997146],[-8.6756191,10.99499],[-8.674252,10.992676],[-8.673042,10.991151],[-8.672148,10.989205],[-8.671774,10.987679],[-8.671665,10.986156],[-8.67199,10.983893],[-8.672884,10.980896],[-8.673515,10.977898],[-8.6737781,10.975532],[-8.673831,10.97327],[-8.673673,10.969958],[-8.6727801,10.966739],[-8.6722911,10.963584],[-8.6719101,10.962388],[-8.669789,10.958798],[-8.66852,10.956337],[-8.666889,10.954444],[-8.66522,10.953033],[-8.663099,10.952109],[-8.660543,10.951456],[-8.65717,10.95151],[-8.653742,10.952341],[-8.6482201,10.953498],[-8.643845,10.954937],[-8.639228,10.956811],[-8.634127,10.959493],[-8.6298131,10.961572],[-8.6268171,10.962858],[-8.6229781,10.964804],[-8.6204011,10.966434],[-8.6187711,10.967223],[-8.6172981,10.967591],[-8.6159311,10.967644],[-8.6143541,10.967065],[-8.6099881,10.964331],[-8.6083051,10.963121],[-8.605518,10.960597],[-8.603309,10.958283],[-8.593475,10.971325],[-8.5917401,10.967539],[-8.5899521,10.964857],[-8.588374,10.962806],[-8.587059,10.961333],[-8.585166,10.960229],[-8.583273,10.959861],[-8.581695,10.959861],[-8.579697,10.960492],[-8.5770681,10.962227],[-8.5748071,10.964226],[-8.5721781,10.967171],[-8.571021,10.967696],[-8.568181,10.967959],[-8.565867,10.968433],[-8.564394,10.969379],[-8.562712,10.971483],[-8.5601871,10.973902],[-8.5570841,10.97732],[-8.5539811,10.979003],[-8.551983,10.980633],[-8.549354,10.983105],[-8.547671,10.985313],[-8.545462,10.986628],[-8.541833,10.98789],[-8.53547,10.990415],[-8.531263,10.991992],[-8.527109,10.993307],[-8.521324,10.994358],[-8.520062,10.994832],[-8.5190631,10.995989],[-8.5181161,10.996883],[-8.5165911,10.997303],[-8.5150131,10.997671],[-8.5131731,10.99825],[-8.5116481,10.999039],[-8.5093871,11.002404],[-8.5078611,11.003614],[-8.5067051,11.00414],[-8.5060211,11.005191],[-8.50376,11.009293],[-8.502918,11.009977],[-8.501709,11.010345],[-8.499973,11.010503],[-8.499027,11.011029],[-8.499237,11.011976],[-8.500184,11.012554],[-8.501288,11.013343],[-8.501866,11.015236],[-8.501341,11.01592],[-8.500446,11.016498],[-8.499815,11.016761],[-8.499815,11.017655],[-8.500184,11.019128],[-8.499763,11.020548],[-8.4992371,11.021547],[-8.4992901,11.022704],[-8.4996581,11.023861],[-8.5007621,11.025438],[-8.5011301,11.026437],[-8.5012881,11.027489],[-8.5004991,11.028225],[-8.4999731,11.028962],[-8.4977641,11.030487],[-8.4970281,11.031854],[-8.4964501,11.032696],[-8.4952401,11.033748],[-8.4932941,11.035746],[-8.4921901,11.035799],[-8.4913491,11.036535],[-8.4912961,11.037429],[-8.4904021,11.039006],[-8.4904021,11.041057],[-8.4900341,11.041215],[-8.4891401,11.0409],[-8.4884561,11.040847],[-8.4875101,11.041215],[-8.4878251,11.042056],[-8.4882461,11.042898],[-8.4883511,11.043739],[-8.4875621,11.044423],[-8.4866161,11.045422],[-8.4865631,11.046737],[-8.4865631,11.048262],[-8.4859321,11.049997],[-8.4855111,11.050786],[-8.4849331,11.05147],[-8.4840911,11.054152],[-8.4831971,11.054573],[-8.4824611,11.054836],[-8.4817251,11.055309],[-8.4816201,11.056203],[-8.4825141,11.056939],[-8.4829871,11.058517],[-8.4839861,11.060357],[-8.4847221,11.06204],[-8.4850381,11.062986],[-8.4848281,11.064143],[-8.4839861,11.065195],[-8.4823561,11.065931],[-8.4815671,11.06693],[-8.4816201,11.067982],[-8.4817771,11.069507],[-8.4817771,11.070611],[-8.4816201,11.071242],[-8.4811461,11.0714],[-8.4790431,11.070348],[-8.4781491,11.06998],[-8.4772021,11.069928],[-8.4761501,11.070191],[-8.4750991,11.069928],[-8.4743101,11.069507],[-8.4725741,11.069139],[-8.4708921,11.068981],[-8.4699981,11.069244],[-8.4693671,11.069612],[-8.4680521,11.06956],[-8.4662641,11.069717],[-8.4649501,11.069612],[-8.4636881,11.069454],[-8.4628461,11.069717],[-8.4619521,11.069875],[-8.4603741,11.069875],[-8.4594281,11.06977],[-8.4533281,11.069665],[-8.4508031,11.069928],[-8.4467011,11.070506],[-8.4453341,11.071032],[-8.4438621,11.071505],[-8.4423891,11.071453],[-8.4353951,11.068613],[-8.4327131,11.066825],[-8.4300421,11.065727],[-8.4267701,11.064827],[-8.4233001,11.064038],[-8.4188821,11.063617],[-8.4133081,11.063249],[-8.3970581,11.062881],[-8.3908001,11.063092],[-8.3883281,11.063407],[-8.3855931,11.064564],[-8.3834371,11.066299],[-8.3807551,11.06835],[-8.3780211,11.070296],[-8.3746021,11.071769],[-8.3706061,11.072663],[-8.3681871,11.072768],[-8.3650841,11.0724],[-8.3620341,11.071663],[-8.3581421,11.070559],[-8.3537771,11.068981],[-8.3481501,11.065984],[-8.3454151,11.064301],[-8.3426811,11.062303],[-8.3402091,11.059936],[-8.3374741,11.056361],[-8.3347921,11.052153],[-8.3309011,11.046526],[-8.3270091,11.04132],[-8.3244851,11.038323],[-8.3206461,11.034379],[-8.3180171,11.031907],[-8.3115481,11.026806],[-8.3091291,11.025228],[-8.3055531,11.023808],[-8.3025561,11.02323],[-8.292143,11.020653],[-8.288725,11.018655],[-8.2869901,11.016499],[-8.284571,11.012291],[-8.2807321,11.000879],[-8.2796341,10.997473],[-8.27858,10.993918],[-8.278054,10.990627],[-8.277791,10.98378],[-8.2775271,10.96311],[-8.277922,10.946652],[-8.277659,10.943492],[-8.277132,10.940596],[-8.274499,10.934671],[-8.271208,10.929536],[-8.263308,10.91479],[-8.258832,10.905574],[-8.257252,10.899913],[-8.256857,10.897543],[-8.256857,10.895173],[-8.257515,10.893857],[-8.259885,10.891355],[-8.269364,10.883719],[-8.284768,10.87187],[-8.298988,10.860547],[-8.301095,10.859099],[-8.303201,10.858309],[-8.305966,10.856466],[-8.308073,10.846986],[-8.308731,10.844748],[-8.308468,10.843168],[-8.305703,10.839877],[-8.3050612,10.8389999],[-8.3028684,10.8360032],[-8.301753,10.834479],[-8.300963,10.832504],[-8.30149,10.828949],[-8.302938,10.82105],[-8.303464,10.81789],[-8.304386,10.815652],[-8.306098,10.813282],[-8.309258,10.809464],[-8.315182,10.804065],[-8.317815,10.801959],[-8.321107,10.798931],[-8.326242,10.793796],[-8.330323,10.789583],[-8.331245,10.788134],[-8.331376,10.786028],[-8.331376,10.776285],[-8.331113,10.773389],[-8.330455,10.772204],[-8.32927,10.771414],[-8.319132,10.771019],[-8.304781,10.77115],[-8.303464,10.771019],[-8.301095,10.770229],[-8.29912,10.768649],[-8.297408,10.766937],[-8.296487,10.765357],[-8.295302,10.764304],[-8.29359,10.763119],[-8.29043,10.759959],[-8.289377,10.757984],[-8.289114,10.752192],[-8.289245,10.750349],[-8.289772,10.747057],[-8.290694,10.743897],[-8.291483,10.741659],[-8.296487,10.732706],[-8.30228,10.723753],[-8.301358,10.721515],[-8.29991,10.719145],[-8.299778,10.716644],[-8.29991,10.713616],[-8.300305,10.711509],[-8.300041,10.710456],[-8.29912,10.709534],[-8.29754,10.708744],[-8.292142,10.706506],[-8.29043,10.705584],[-8.28885,10.704399],[-8.28806,10.703083],[-8.287797,10.701766],[-8.288324,10.700186],[-8.288587,10.698738],[-8.289772,10.697158],[-8.291878,10.694788],[-8.29359,10.693867],[-8.297408,10.692418],[-8.298988,10.689785],[-8.299646,10.688205],[-8.298988,10.676356],[-8.301753,10.676224],[-8.306361,10.676093],[-8.308731,10.675698],[-8.311759,10.67504],[-8.314787,10.674513],[-8.319922,10.673986],[-8.321502,10.673065],[-8.322687,10.670958],[-8.322818,10.669378],[-8.32137,10.664639],[-8.319922,10.658055],[-8.319527,10.655027],[-8.319527,10.651868],[-8.31979,10.647654],[-8.320449,10.645416],[-8.322555,10.641335],[-8.325715,10.635673],[-8.32769,10.632382],[-8.328348,10.630407],[-8.328611,10.623824],[-8.328348,10.618953],[-8.326505,10.60526],[-8.325583,10.596308],[-8.325847,10.592885],[-8.32532,10.591041],[-8.324909,10.590496],[-8.311926,10.590496],[-8.310311,10.588803],[-8.307546,10.588935],[-8.306229,10.58933],[-8.305439,10.58933],[-8.304254,10.588935],[-8.301885,10.588935],[-8.300436,10.589461],[-8.300041,10.589725],[-8.299251,10.589198],[-8.297935,10.588145],[-8.29596,10.58696],[-8.2943801,10.586302],[-8.29359,10.586433],[-8.2935034,10.586737],[-8.293327,10.587355],[-8.2928646,10.5878166],[-8.2928,10.587881],[-8.292537,10.58854],[-8.2925026,10.5888496],[-8.292273,10.59091],[-8.291483,10.591173],[-8.290694,10.591568],[-8.2902643,10.5922547],[-8.290035,10.592621],[-8.28964,10.593148],[-8.288324,10.593938],[-8.287797,10.595123],[-8.287402,10.595386],[-8.283847,10.591963],[-8.278186,10.586697],[-8.2763431,10.584722],[-8.2741041,10.581035],[-8.2717351,10.57748],[-8.2705501,10.576164],[-8.2694961,10.575374],[-8.2691011,10.573662],[-8.2688381,10.571556],[-8.2689701,10.569581],[-8.2706811,10.566553],[-8.2721301,10.563788],[-8.2727881,10.561945],[-8.2729201,10.558653],[-8.2722611,10.556152],[-8.2716031,10.554045],[-8.2704181,10.552728],[-8.2687061,10.551543],[-8.2676531,10.550358],[-8.2666001,10.54891],[-8.2651511,10.548383],[-8.2638351,10.54812],[-8.2630451,10.547725],[-8.2621231,10.546277],[-8.2618601,10.54496],[-8.2619921,10.541932],[-8.2619921,10.538904],[-8.2617281,10.53706],[-8.2601481,10.533506],[-8.2585681,10.530214],[-8.2551451,10.526528],[-8.2529071,10.524026],[-8.2492211,10.518496],[-8.2476411,10.515863],[-8.2459291,10.513362],[-8.2450071,10.511255],[-8.2444811,10.50849],[-8.2444811,10.505594],[-8.2452711,10.50125],[-8.2454021,10.498748],[-8.2450071,10.49651],[-8.2444811,10.491507],[-8.2435591,10.490585],[-8.2413211,10.489005],[-8.2402681,10.48703],[-8.2394781,10.484924],[-8.2389511,10.483081],[-8.2388191,10.480184],[-8.2382931,10.478209],[-8.2371081,10.474654],[-8.2360551,10.472548],[-8.2350011,10.470573],[-8.2346061,10.468598],[-8.2344751,10.465965],[-8.2348701,10.462146],[-8.2350011,10.459513],[-8.2350011,10.45767],[-8.2347381,10.455168],[-8.2342111,10.452009],[-8.233158,10.447796],[-8.2323681,10.445557],[-8.2318421,10.443187],[-8.2314471,10.441081],[-8.2313151,10.43621],[-8.2314471,10.430153],[-8.2311981,10.426193],[-8.2309421,10.423667],[-8.231326,10.421877],[-8.231447,10.420674],[-8.231183,10.419884],[-8.230393,10.419489],[-8.228682,10.41962],[-8.22776,10.419884],[-8.227069,10.420147],[-8.226871,10.42074],[-8.226497,10.421013],[-8.226178,10.420853],[-8.226146,10.420278],[-8.22621,10.41983],[-8.225858,10.419638],[-8.225226,10.419687],[-8.224633,10.420411],[-8.2239111,10.421601],[-8.223185,10.421925],[-8.221803,10.421991],[-8.2209471,10.422715],[-8.2202891,10.422912],[-8.2192351,10.422846],[-8.2185111,10.424229],[-8.2179191,10.424295],[-8.2174581,10.4239],[-8.2172611,10.422912],[-8.2166681,10.421727],[-8.2160401,10.421589],[-8.215154,10.421793],[-8.21443,10.422122],[-8.213514,10.4221],[-8.2126521,10.421662],[-8.212652,10.42074],[-8.212258,10.419621],[-8.211661,10.419272],[-8.208703,10.41916],[-8.2083081,10.418568],[-8.2077151,10.417975],[-8.2072551,10.418238],[-8.2065951,10.41852],[-8.2032391,10.418304],[-8.2025151,10.417975],[-8.2019881,10.417383],[-8.2011321,10.417053],[-8.1996181,10.417119],[-8.1989331,10.417432],[-8.1979791,10.417564],[-8.1962571,10.41743],[-8.1952231,10.417272],[-8.1945491,10.416988],[-8.1938911,10.416988],[-8.1932401,10.41692],[-8.1921801,10.416198],[-8.191243,10.415738],[-8.190555,10.415577],[-8.189755,10.415769],[-8.189243,10.415769],[-8.188988,10.415545],[-8.188956,10.415097],[-8.1886681,10.414873],[-8.188362,10.415144],[-8.1878361,10.415992],[-8.1872421,10.416132],[-8.186584,10.415737],[-8.186057,10.415013],[-8.1854651,10.414947],[-8.18507,10.415671],[-8.184543,10.415737],[-8.184083,10.41521],[-8.183293,10.415144],[-8.1825691,10.414881],[-8.182108,10.415079],[-8.1817791,10.416066],[-8.1815811,10.417185],[-8.1810541,10.417251],[-8.1807911,10.417778],[-8.180923,10.420016],[-8.180725,10.420411],[-8.1792771,10.41916],[-8.178685,10.420016],[-8.178026,10.420477],[-8.177105,10.420477],[-8.176644,10.420872],[-8.175854,10.420872],[-8.175327,10.420608],[-8.174669,10.420082],[-8.17355,10.420082],[-8.172431,10.420477],[-8.171509,10.421333],[-8.1710481,10.422649],[-8.1705211,10.423768],[-8.1697361,10.424604],[-8.1686781,10.42469],[-8.1679541,10.425085],[-8.1666381,10.426731],[-8.1650581,10.428179],[-8.1630171,10.428442],[-8.1621611,10.428442],[-8.1611741,10.428113],[-8.1604501,10.427521],[-8.1598571,10.427257],[-8.1595031,10.42736],[-8.1593961,10.427652],[-8.1597251,10.428311],[-8.1610421,10.429825],[-8.1610161,10.430196],[-8.1607131,10.430351],[-8.1595941,10.43022],[-8.1586721,10.42989],[-8.1572331,10.429775],[-8.1568951,10.429298],[-8.1566371,10.429021],[-8.1561231,10.429094],[-8.1541241,10.430726],[-8.1536981,10.430799],[-8.1532081,10.430615],[-8.1526161,10.430088],[-8.1518921,10.429627],[-8.1511681,10.429495],[-8.1502151,10.429756],[-8.1493041,10.429873],[-8.1487981,10.42943],[-8.1478101,10.429298],[-8.1470201,10.429759],[-8.1460991,10.431075],[-8.1455711,10.431396],[-8.1450461,10.43147],[-8.1445851,10.43101],[-8.1441241,10.43068],[-8.1436021,10.430667],[-8.1432021,10.430878],[-8.1430711,10.431339],[-8.1432681,10.431799],[-8.1437291,10.432326],[-8.1435061,10.432606],[-8.1430501,10.432739],[-8.1420171,10.432787],[-8.1408981,10.43305],[-8.1404341,10.433209],[-8.1399941,10.433606],[-8.1394201,10.434355],[-8.1390551,10.434498],[-8.1386561,10.434517],[-8.1380791,10.434304],[-8.1377161,10.434267],[-8.1372781,10.434433],[-8.1360701,10.43509],[-8.1359611,10.43542],[-8.1361141,10.435604],[-8.1364881,10.435749],[-8.1376071,10.435947],[-8.1378191,10.436177],[-8.1377311,10.437147],[-8.1374751,10.43779],[-8.1372161,10.438161],[-8.1360931,10.438712],[-8.1358201,10.439249],[-8.1354821,10.439704],[-8.1347911,10.440057],[-8.1323521,10.442717],[-8.1318891,10.442965],[-8.1306941,10.443253],[-8.1296921,10.443731],[-8.1289431,10.443805],[-8.1285221,10.443912],[-8.1276791,10.444613],[-8.1274031,10.444702],[-8.127091,10.44451],[-8.1266211,10.443569],[-8.1259551,10.443122],[-8.1252101,10.443055],[-8.1242431,10.443253],[-8.1213461,10.444175],[-8.120227,10.444833],[-8.1180231,10.444818],[-8.117528,10.444899],[-8.117362,10.445142],[-8.1173471,10.445553],[-8.11748,10.446949],[-8.117274,10.447449],[-8.116936,10.447831],[-8.11529,10.448454],[-8.113974,10.449046],[-8.1136891,10.449257],[-8.1135791,10.449573],[-8.1135121,10.450477],[-8.1130421,10.451241],[-8.1130521,10.451877],[-8.1129201,10.452601],[-8.1126751,10.45274],[-8.1116041,10.452667],[-8.1113671,10.452872],[-8.1107051,10.454326],[-8.1104551,10.454488],[-8.1101911,10.454488],[-8.1099561,10.454356],[-8.1096951,10.453852],[-8.1094311,10.452733],[-8.1092341,10.451614],[-8.1089711,10.450626],[-8.1087061,10.450168],[-8.1082661,10.449844],[-8.1076781,10.449609],[-8.1070621,10.449573],[-8.1004791,10.449639],[-8.0996101,10.449506],[-8.0990961,10.44931],[-8.098713,10.44911],[-8.098449,10.448874],[-8.098317,10.448404],[-8.098346,10.447772],[-8.098833,10.446084],[-8.0992941,10.44536],[-8.0992131,10.445039],[-8.0990521,10.444745],[-8.0987141,10.444657],[-8.0977441,10.445215],[-8.0975091,10.445274],[-8.0972881,10.445215],[-8.0971411,10.444906],[-8.0971851,10.443966],[-8.0974501,10.443253],[-8.0981091,10.442068],[-8.0985701,10.441081],[-8.0987871,10.440381],[-8.0991251,10.440248],[-8.0996231,10.440357],[-8.1008011,10.441189],[-8.1015061,10.441512],[-8.1017711,10.441791],[-8.1019931,10.442332],[-8.1024171,10.442599],[-8.1027171,10.442661],[-8.1030931,10.442555],[-8.1033751,10.442332],[-8.1037701,10.441542],[-8.1037041,10.440686],[-8.1034461,10.440278],[-8.1032841,10.439925],[-8.1031781,10.437921],[-8.1034311,10.437618],[-8.1040631,10.437426],[-8.1046061,10.437191],[-8.1047831,10.436956],[-8.1048271,10.436677],[-8.1046651,10.436368],[-8.1042311,10.43588],[-8.1030461,10.434695],[-8.1024531,10.434037],[-8.1022991,10.433709],[-8.1023881,10.433445],[-8.1026811,10.433356],[-8.1031781,10.433445],[-8.1035341,10.433312],[-8.1037701,10.43305],[-8.1038721,10.432665],[-8.1038421,10.432092],[-8.1035781,10.431931],[-8.1030051,10.431975],[-8.1025851,10.432129],[-8.1021231,10.432401],[-8.1017561,10.432445],[-8.1014621,10.432327],[-8.1004791,10.431404],[-8.1003591,10.431093],[-8.1003741,10.430828],[-8.1009331,10.429594],[-8.1013731,10.428447],[-8.1014471,10.427904],[-8.1013291,10.427345],[-8.1006241,10.426037],[-8.1005511,10.42567],[-8.1006391,10.425302],[-8.1010061,10.424597],[-8.1013291,10.423803],[-8.1013731,10.423348],[-8.1010721,10.42327],[-8.0996891,10.423307],[-8.0993601,10.423157],[-8.0991621,10.422847],[-8.099095,10.42254],[-8.099162,10.422254],[-8.100638,10.421496],[-8.101203,10.421069],[-8.102124,10.420279],[-8.102328,10.419777],[-8.1024531,10.418173],[-8.1019271,10.417712],[-8.1010711,10.417119],[-8.1008741,10.416527],[-8.10108,10.41575],[-8.1013881,10.415001],[-8.1017851,10.414428],[-8.1021081,10.414207],[-8.1028281,10.414193],[-8.1032251,10.41406],[-8.1034461,10.41381],[-8.1035731,10.413499],[-8.1036061,10.412643],[-8.1033721,10.412091],[-8.1023731,10.410945],[-8.1022551,10.410474],[-8.1023581,10.410048],[-8.1036071,10.409372],[-8.1040331,10.408961],[-8.1043571,10.40827],[-8.1045281,10.407245],[-8.1047911,10.404743],[-8.1051361,10.400775],[-8.1052831,10.398454],[-8.1052091,10.397851],[-8.1044741,10.396543],[-8.1042251,10.396044],[-8.1040921,10.395618],[-8.1041361,10.395353],[-8.1047831,10.394604],[-8.1049891,10.394104],[-8.1050541,10.393421],[-8.1043961,10.391972],[-8.1037371,10.389471],[-8.1033131,10.388299],[-8.1016311,10.384995],[-8.1000951,10.382626],[-8.0975491,10.379465],[-8.0916251,10.372487],[-8.0901751,10.370281],[-8.0859631,10.360506],[-8.0845151,10.357741],[-8.0822771,10.354318],[-8.0790361,10.351266],[-8.0773611,10.349208],[-8.07401,10.344476],[-8.071218,10.341152],[-8.0674001,10.338124],[-8.0640511,10.335865],[-8.0584471,10.332989],[-8.0554191,10.331936],[-8.0525221,10.331409],[-8.0496261,10.331277],[-8.0467291,10.331804],[-8.0434381,10.332726],[-8.0396201,10.334964],[-8.0375131,10.336807],[-8.0351431,10.338519],[-8.0324511,10.339744],[-8.030272,10.340888],[-8.028955,10.342732],[-8.0277701,10.345233],[-8.0269841,10.346151],[-8.025926,10.346621],[-8.022767,10.346681],[-8.019871,10.346681],[-8.0154031,10.347268],[-8.0135511,10.347603],[-8.0111811,10.347603],[-8.0094661,10.347209],[-8.0083491,10.347209],[-8.0074681,10.347562],[-8.0064091,10.348267],[-8.0047301,10.349841],[-8.0024921,10.351158],[-7.9997271,10.351421],[-7.9974881,10.351158],[-7.9919591,10.348656],[-7.9885361,10.346286],[-7.985244,10.34339],[-7.983006,10.339967],[-7.9812941,10.33628],[-7.9798461,10.332199],[-7.9790561,10.327854],[-7.9789251,10.324695],[-7.9786611,10.322193],[-7.9768181,10.316927],[-7.9752381,10.31482],[-7.9724741,10.310344],[-7.9719471,10.308106],[-7.9706301,10.299679],[-7.9693141,10.294413],[-7.9673391,10.288225],[-7.9653641,10.283749],[-7.9632571,10.280457],[-7.9606241,10.277561],[-7.9574641,10.274796],[-7.9550941,10.272953],[-7.9552261,10.270714],[-7.9550941,10.267818],[-7.9540411,10.264921],[-7.9524611,10.262683],[-7.9499601,10.260445],[-7.9475901,10.25768],[-7.9460101,10.254915],[-7.9450881,10.252545],[-7.9452201,10.247411],[-7.9454831,10.244382],[-7.9461421,10.240828],[-7.9471951,10.238985],[-7.9482481,10.237405],[-7.9515401,10.235035],[-7.9540411,10.232928],[-7.9557531,10.230427],[-7.9569381,10.227662],[-7.9574641,10.225029],[-7.9575961,10.222791],[-7.9572011,10.220026],[-7.9566741,10.216998],[-7.9564111,10.214628],[-7.9610191,10.199882],[-7.9624671,10.196722],[-7.9635211,10.19501],[-7.9653641,10.193694],[-7.9686551,10.192509],[-7.9732631,10.189744],[-7.9747121,10.187638],[-7.9753701,10.184609],[-7.9757651,10.180791],[-7.9762921,10.176973],[-7.979352,10.1703239],[-7.9832817,10.1725095],[-7.9857551,10.173619],[-7.9880741,10.17375],[-7.9895111,10.1735],[-7.9905241,10.168727],[-7.9905071,10.165237],[-7.9907111,10.163548],[-7.9911401,10.159131],[-7.9904221,10.157132],[-7.9905541,10.155214],[-7.9913271,10.155007],[-7.9916331,10.154549],[-7.9923591,10.154167],[-7.9927801,10.153517],[-7.9928941,10.152256],[-7.9936201,10.150956],[-7.9944231,10.150077],[-7.9948821,10.148854],[-7.9950731,10.146026],[-7.9958041,10.145468],[-7.9973001,10.143474],[-7.9978001,10.143033],[-7.9985241,10.142832],[-8.0001131,10.142521],[-8.0006641,10.142563],[-8.0017151,10.142764],[-8.0022161,10.142938],[-8.0047621,10.143077],[-8.0055501,10.142596],[-8.0071121,10.142128],[-8.0115321,10.138626],[-8.0132321,10.136819],[-8.0142381,10.134687],[-8.0134571,10.133714],[-8.0133801,10.133107],[-8.0122841,10.132186],[-8.0105461,10.131901],[-8.0091461,10.1305],[-8.0088161,10.127991],[-8.0100511,10.127574],[-8.0122721,10.125311],[-8.0129811,10.122398],[-8.0136661,10.119831],[-8.0137451,10.114518],[-8.0135311,10.112407],[-8.0134151,10.110637],[-8.0135521,10.108904],[-8.0133611,10.10715],[-8.0128281,10.105264],[-8.0124471,10.104379],[-8.0113581,10.10331],[-8.0115971,10.102293],[-8.0117581,10.10135],[-8.0108641,10.100722],[-8.0100751,10.100057],[-8.0095751,10.099367],[-8.0090511,10.098891],[-8.0087901,10.098106],[-8.0088061,10.097318],[-8.0097291,10.097429],[-8.0105951,10.09721],[-8.0115381,10.097067],[-8.0124881,10.09636],[-8.0145811,10.09594],[-8.0159811,10.095512],[-8.0169131,10.095481],[-8.0186881,10.095631],[-8.0194971,10.094941],[-8.0205681,10.094894],[-8.0209491,10.094156],[-8.0209721,10.093537],[-8.0207231,10.092781],[-8.0206711,10.092072],[-8.0209251,10.091467],[-8.0221821,10.091005],[-8.0231171,10.090786],[-8.0252871,10.090993],[-8.0259311,10.09098],[-8.0265571,10.091115],[-8.0268331,10.091595],[-8.0274371,10.092311],[-8.0298001,10.092099],[-8.0304921,10.091556],[-8.0322281,10.090971],[-8.0325881,10.090539],[-8.0331291,10.089329],[-8.0338941,10.088129],[-8.0343271,10.086848],[-8.0344801,10.086113],[-8.0342521,10.083281],[-8.0345031,10.083149],[-8.0356131,10.082934],[-8.0380461,10.082964],[-8.0389861,10.083061],[-8.0417701,10.082324],[-8.0434121,10.081277],[-8.0440141,10.080727],[-8.0444401,10.080454],[-8.0451491,10.08061],[-8.0468541,10.080339],[-8.0494271,10.079617],[-8.0514031,10.080061],[-8.0564511,10.078041],[-8.0577131,10.07697],[-8.0584021,10.075756],[-8.0584071,10.074843],[-8.0585691,10.07419],[-8.0584171,10.072903],[-8.0599511,10.071015],[-8.0610401,10.07112],[-8.0644591,10.070194],[-8.0659381,10.069632],[-8.0680571,10.07017],[-8.0693641,10.070174],[-8.0714181,10.071925],[-8.0723941,10.072139],[-8.0731091,10.072449],[-8.0737861,10.072622],[-8.0740541,10.072754],[-8.0745671,10.072794],[-8.0765061,10.070947],[-8.0768741,10.070398],[-8.0772291,10.070314],[-8.0775881,10.070393],[-8.0780251,10.070403],[-8.0783341,10.068672],[-8.0782871,10.067729],[-8.0780811,10.065763],[-8.0774381,10.064716],[-8.0770511,10.063438],[-8.0771531,10.062384],[-8.0781221,10.062011],[-8.0791931,10.062153],[-8.0798531,10.062453],[-8.0813571,10.062952],[-8.0818881,10.062945],[-8.0825701,10.063136],[-8.0853471,10.063158],[-8.0875831,10.063126],[-8.0890821,10.062579],[-8.0906041,10.062341],[-8.0924401,10.061721],[-8.0943801,10.062955],[-8.0951651,10.064073],[-8.0963551,10.06493],[-8.0974971,10.064858],[-8.0986391,10.065572],[-8.0998131,10.06591],[-8.1019071,10.065411],[-8.1046131,10.063441],[-8.1055661,10.062681],[-8.1083821,10.060892],[-8.1097841,10.059684],[-8.1119611,10.057613],[-8.1138931,10.057914],[-8.1155991,10.058481],[-8.1160521,10.058185],[-8.1169171,10.0573],[-8.1176901,10.056258],[-8.1182901,10.054753],[-8.1190161,10.053351],[-8.1194301,10.052087],[-8.1201101,10.051315],[-8.1210561,10.049795],[-8.1212301,10.049223],[-8.1212971,10.048462],[-8.1219211,10.045628],[-8.1228321,10.04376],[-8.1231811,10.042207],[-8.1231101,10.041183],[-8.1228011,10.040398],[-8.1225901,10.039526],[-8.1225481,10.039078],[-8.1228441,10.037775],[-8.1234961,10.036955],[-8.1241091,10.035925],[-8.1240851,10.03483],[-8.1237291,10.034093],[-8.1225391,10.032784],[-8.1218831,10.031972],[-8.1210651,10.030768],[-8.1209941,10.029625],[-8.1212321,10.028287],[-8.1218021,10.027383],[-8.1225361,10.026005],[-8.1229001,10.019475],[-8.1232201,10.019079],[-8.1250851,10.018983],[-8.1271311,10.01746],[-8.1277061,10.016718],[-8.1279801,10.01593],[-8.1283401,10.015112],[-8.1285331,10.0144659],[-8.1274471,10.0134869],[-8.1268051,10.0122259],[-8.1266318,10.011414],[-8.1270396,10.0102781],[-8.1285724,10.0079805],[-8.1294762,10.0050108],[-8.1308437,10.0019196],[-8.1309708,10.0009206],[-8.1306668,9.9991108],[-8.1308647,9.995717],[-8.1318764,9.9941802],[-8.1321843,9.9934135],[-8.1330262,9.9928338],[-8.133782,9.992518],[-8.134173,9.992512],[-8.1349771,9.9927439],[-8.135587,9.99284],[-8.136308,9.992752],[-8.137113,9.992425],[-8.137454,9.992214],[-8.137606,9.99202],[-8.137609,9.99157],[-8.1382911,9.9911469],[-8.140591,9.990064],[-8.141432,9.989812],[-8.142057,9.989312],[-8.1437641,9.9883129],[-8.1453087,9.9876388],[-8.1466842,9.9858261],[-8.1469721,9.9845949],[-8.1471052,9.9832452],[-8.1462996,9.9815185],[-8.1459464,9.9792884],[-8.144777,9.9759822],[-8.1444581,9.9754449],[-8.143973,9.9750312],[-8.1419393,9.9744246],[-8.1406126,9.9737459],[-8.1369803,9.9714012],[-8.1352664,9.9706133],[-8.1320342,9.9703075],[-8.1311733,9.9703843],[-8.1306717,9.970696],[-8.1272108,9.9760799],[-8.1263616,9.9768534],[-8.1251714,9.9775963],[-8.1242544,9.9780194],[-8.123376,9.978781],[-8.1225013,9.9797134],[-8.1217869,9.9800043],[-8.1170445,9.9794564],[-8.1150284,9.9797116],[-8.1146201,9.9796389],[-8.1140643,9.9791695],[-8.1136891,9.9784384],[-8.1136214,9.9759727],[-8.1126872,9.9735363],[-8.111523,9.9711854],[-8.1118205,9.9679522],[-8.1116586,9.9649864],[-8.1120534,9.9620302],[-8.1124905,9.9612508],[-8.113962,9.9600344],[-8.1148178,9.9589322],[-8.1158638,9.9570468],[-8.1163554,9.9565064],[-8.1171293,9.9562455],[-8.1181875,9.956392],[-8.1206927,9.9579484],[-8.1219868,9.9584914],[-8.1228284,9.9590489],[-8.1243404,9.9591986],[-8.1259196,9.9593963],[-8.127232,9.9593594],[-8.1284918,9.9592749],[-8.1291749,9.9591307],[-8.13124,9.9569847],[-8.1333129,9.9556548],[-8.1362286,9.9531549],[-8.1384601,9.9518379],[-8.1406161,9.9507862],[-8.1436095,9.9495991],[-8.1453755,9.9491001],[-8.1482227,9.9485811],[-8.1505783,9.9487168],[-8.1524643,9.9491051],[-8.1542438,9.9497476],[-8.1560766,9.9509601],[-8.1574294,9.9513859],[-8.1588291,9.9523919],[-8.1597898,9.9529222],[-8.1608199,9.9530329],[-8.1616156,9.9526863],[-8.1624389,9.9519869],[-8.163068,9.9512585],[-8.163334,9.9505391],[-8.1636789,9.949173],[-8.1636301,9.9479799],[-8.163716,9.947669],[-8.163913,9.947505],[-8.16377,9.947019],[-8.1632161,9.9465449],[-8.162337,9.946156],[-8.1608571,9.9456809],[-8.1583171,9.9453499],[-8.1570671,9.945496],[-8.1551289,9.9456393],[-8.1545438,9.9455307],[-8.1524896,9.944563],[-8.1516593,9.9437527],[-8.1508033,9.9422428],[-8.1502527,9.9416752],[-8.1491267,9.9411049],[-8.1471897,9.9404645],[-8.1469088,9.9398686],[-8.1469301,9.9387981],[-8.1473371,9.9376537],[-8.1480068,9.9364783],[-8.1486414,9.9360169],[-8.1502931,9.9359023],[-8.1533671,9.9358294],[-8.1541228,9.9353847],[-8.1547066,9.9343761],[-8.1556406,9.9338423],[-8.156152,9.933735],[-8.156664,9.93374],[-8.157315,9.933813],[-8.1578321,9.9336129],[-8.158287,9.933302],[-8.16035,9.931747],[-8.1609631,9.9309939],[-8.1612673,9.930471],[-8.161384,9.929866],[-8.161209,9.9291],[-8.1606961,9.9284969],[-8.160171,9.927589],[-8.1596031,9.9257479],[-8.1597261,9.9241529],[-8.159333,9.922318],[-8.1587199,9.9213021],[-8.157763,9.920509],[-8.157378,9.919878],[-8.1572141,9.9189209],[-8.156693,9.917725],[-8.156451,9.917337],[-8.1552456,9.9161383],[-8.1543139,9.9144294],[-8.1532692,9.9130383],[-8.1526467,9.9117892],[-8.151935,9.9101195],[-8.1518468,9.9094683],[-8.1514736,9.9090136],[-8.1508361,9.9085802],[-8.1502613,9.9086335],[-8.1497033,9.9089825],[-8.1492138,9.9100497],[-8.1483744,9.9110928],[-8.1476603,9.9116325],[-8.1460724,9.9133589],[-8.1444032,9.914522],[-8.1418761,9.9150289],[-8.1403789,9.9152039],[-8.1395138,9.9155301],[-8.1386891,9.9161196],[-8.1337327,9.9174056],[-8.1322551,9.9176506],[-8.1296882,9.915914],[-8.1286744,9.9156446],[-8.1282683,9.9151992],[-8.1282147,9.914833],[-8.1284645,9.9143944],[-8.1292421,9.9139353],[-8.1309885,9.913331],[-8.1324856,9.9130272],[-8.1328135,9.9126606],[-8.133343,9.911359],[-8.1333568,9.9104769],[-8.1329731,9.9100463],[-8.1317049,9.9094885],[-8.1305788,9.908637],[-8.1298073,9.9083983],[-8.1271983,9.9081237],[-8.1245736,9.9072569],[-8.1229209,9.9062694],[-8.1222472,9.9055301],[-8.1214586,9.904096],[-8.1206652,9.9013255],[-8.1206786,9.9004562],[-8.1208959,9.9000966],[-8.1214641,9.8996314],[-8.1218729,9.8987636],[-8.1221567,9.8975183],[-8.1225441,9.896267],[-8.1227212,9.8952244],[-8.1226142,9.8932078],[-8.1227364,9.891507],[-8.1227657,9.8898813],[-8.1229966,9.888733],[-8.1239191,9.8855564],[-8.1246551,9.8841789],[-8.1267152,9.8812234],[-8.1275061,9.880348],[-8.129226,9.8792719],[-8.1303599,9.8783666],[-8.1308778,9.8784466],[-8.1313631,9.8788419],[-8.1324285,9.8807262],[-8.1342393,9.8838039],[-8.1354209,9.8853556],[-8.1361161,9.8865067],[-8.1366343,9.8869257],[-8.1373764,9.8869978],[-8.1381141,9.8867992],[-8.1394561,9.8857999],[-8.139843,9.8852397],[-8.1397264,9.8836505],[-8.1398981,9.8814476],[-8.1403745,9.8808967],[-8.1404538,9.8800419],[-8.1408723,9.8786464],[-8.1410401,9.8766829],[-8.1404404,9.8744903],[-8.1400047,9.8720297],[-8.1393498,9.8698315],[-8.1389868,9.8689409],[-8.1379805,9.8681908],[-8.1366301,9.8673253],[-8.1353456,9.866179],[-8.1338746,9.8652035],[-8.1323089,9.8644979],[-8.131395,9.8636058],[-8.1307107,9.863734],[-8.1298817,9.8652684],[-8.1291724,9.8658793],[-8.1281349,9.8664513],[-8.1270256,9.867838],[-8.1263639,9.8684695],[-8.1253253,9.8690505],[-8.1236808,9.869608],[-8.1202683,9.8697222],[-8.1186413,9.8700301],[-8.1175277,9.8699732],[-8.115553,9.8702927],[-8.1141011,9.8705521],[-8.1123249,9.8705123],[-8.1100254,9.8707928],[-8.1081311,9.8708339],[-8.1067115,9.8712248],[-8.1056799,9.8718687],[-8.1050556,9.8724132],[-8.1045922,9.8735674],[-8.1039995,9.8737391],[-8.1031536,9.8735633],[-8.1015066,9.8719129],[-8.0990714,9.8700177],[-8.0981583,9.8690327],[-8.0973485,9.8677411],[-8.0964629,9.8656734],[-8.0957356,9.8648078],[-8.0951559,9.8636468],[-8.095037,9.862938],[-8.0950191,9.8611839],[-8.0947724,9.8603003],[-8.0948979,9.8595504],[-8.0949153,9.859003],[-8.0951604,9.8579949],[-8.0955001,9.857489],[-8.09643,9.8560546],[-8.0969565,9.8550143],[-8.0974541,9.8539738],[-8.0976304,9.853332],[-8.0975888,9.8507446],[-8.0976837,9.8491599],[-8.0973331,9.8476962],[-8.0969322,9.8457806],[-8.096315,9.8441342],[-8.0963741,9.8435059],[-8.096865,9.8424574],[-8.1001091,9.8409189],[-8.1009421,9.8401459],[-8.1012397,9.8396075],[-8.1014161,9.8387059],[-8.1012681,9.8381149],[-8.100457,9.8375741],[-8.0995296,9.8370619],[-8.0992855,9.836576],[-8.09905,9.8346792],[-8.0988291,9.8340299],[-8.098086,9.833516],[-8.0978369,9.8331145],[-8.0974908,9.832973],[-8.0969669,9.8330669],[-8.0965204,9.8333429],[-8.095858,9.8341109],[-8.0955793,9.8347854],[-8.0954804,9.8354114],[-8.0954049,9.8362485],[-8.0951835,9.8367055],[-8.0943678,9.8367673],[-8.0933299,9.8363402],[-8.0926595,9.8347511],[-8.0923169,9.8332662],[-8.0927881,9.8317616],[-8.0928716,9.8311801],[-8.0926374,9.8306932],[-8.0928492,9.8298885],[-8.0931149,9.829157],[-8.0947687,9.8285564],[-8.0950302,9.8281224],[-8.0952514,9.8275154],[-8.0956868,9.8270545],[-8.0961748,9.8269831],[-8.096595,9.826657],[-8.0978464,9.8260495],[-8.0979431,9.8256239],[-8.0973071,9.8246069],[-8.096759,9.824317],[-8.09612,9.824417],[-8.095218,9.824334],[-8.0948691,9.8240609],[-8.0946681,9.8236499],[-8.0943901,9.8228529],[-8.0943492,9.8220706],[-8.0948028,9.8215737],[-8.0948069,9.8205708],[-8.0948909,9.8201738],[-8.095337,9.8196586],[-8.0957473,9.8197451],[-8.0961718,9.8199017],[-8.0965779,9.8197652],[-8.0967917,9.8192379],[-8.0967842,9.8189242],[-8.0966576,9.8186406],[-8.096292,9.8184269],[-8.0956831,9.8185649],[-8.0946834,9.8177474],[-8.094716,9.8175434],[-8.0953201,9.817023],[-8.0961267,9.8168358],[-8.0964256,9.8165112],[-8.0966107,9.8161064],[-8.0968228,9.8153533],[-8.0969898,9.8141968],[-8.0969677,9.8138426],[-8.0966266,9.8135875],[-8.0958002,9.8143614],[-8.0955144,9.8147685],[-8.0952239,9.8147778],[-8.0949832,9.8145758],[-8.0948797,9.8143075],[-8.0949065,9.8140629],[-8.0952627,9.8135656],[-8.0957376,9.8127174],[-8.095962,9.812621],[-8.0962456,9.812695],[-8.0966106,9.8126992],[-8.096933,9.8124389],[-8.0969172,9.8121508],[-8.096259,9.811883],[-8.0961961,9.8117819],[-8.0962592,9.8115798],[-8.0961422,9.8113014],[-8.0955654,9.811088],[-8.095461,9.8108586],[-8.09574,9.810252],[-8.095784,9.809928],[-8.09572,9.809704],[-8.0954543,9.8091311],[-8.0954759,9.8086123],[-8.0946117,9.8081697],[-8.0945216,9.8079174],[-8.0946953,9.8076002],[-8.0955625,9.8074599],[-8.0965516,9.8068289],[-8.097039,9.806072],[-8.0978211,9.8054309],[-8.0983221,9.8051069],[-8.0987307,9.8051264],[-8.0990751,9.805528],[-8.0996346,9.8061526],[-8.0999945,9.8061461],[-8.1005856,9.8064156],[-8.1013161,9.8063406],[-8.1020486,9.806431],[-8.103203,9.80684],[-8.103928,9.807212],[-8.1041123,9.8078198],[-8.104887,9.808547],[-8.1070315,9.8098256],[-8.1075621,9.8098477],[-8.1082995,9.8096917],[-8.1093098,9.8099224],[-8.109863,9.809892],[-8.1099831,9.8096896],[-8.1099399,9.8093822],[-8.1099343,9.8088683],[-8.1101903,9.8087107],[-8.1106932,9.8086511],[-8.1110192,9.8084088],[-8.1112875,9.8079887],[-8.1111789,9.807041],[-8.1112486,9.8068202],[-8.1118002,9.8064057],[-8.1118985,9.8060457],[-8.1114399,9.8055916],[-8.1105514,9.8053653],[-8.1100526,9.8048146],[-8.1101543,9.8042031],[-8.1099423,9.8035454],[-8.1093795,9.8029665],[-8.1073517,9.8012162],[-8.1051548,9.7993963],[-8.1040895,9.79852],[-8.103506,9.7977382],[-8.102912,9.7973641],[-8.1009055,9.7966134],[-8.0988823,9.7970194],[-8.0985598,9.7968275],[-8.098255,9.7963053],[-8.0978097,9.7952913],[-8.0975895,9.7945165],[-8.0969643,9.7932202],[-8.0970537,9.7919424],[-8.0972607,9.7915922],[-8.0976523,9.7913545],[-8.0979275,9.7913272],[-8.09842,9.791618],[-8.098617,9.7919984],[-8.0987071,9.792505],[-8.0990069,9.7927972],[-8.0993619,9.7928655],[-8.0995533,9.7925592],[-8.0996174,9.7918335],[-8.099903,9.791495],[-8.1003349,9.791511],[-8.1011265,9.7911717],[-8.1018008,9.7912007],[-8.1024181,9.7913352],[-8.103147,9.792003],[-8.1036692,9.7923373],[-8.1040993,9.7925039],[-8.105072,9.7925075],[-8.1061769,9.7923676],[-8.1067052,9.7920976],[-8.1070237,9.7916753],[-8.1074168,9.791546],[-8.1076601,9.7916556],[-8.1081471,9.7924695],[-8.1086417,9.7927167],[-8.1091565,9.7927782],[-8.1101068,9.7925684],[-8.112149,9.7912023],[-8.1124006,9.7908893],[-8.1124271,9.7904314],[-8.1126663,9.7901104],[-8.113328,9.789659],[-8.1134203,9.7893447],[-8.1132293,9.7890549],[-8.1122541,9.7891513],[-8.1117949,9.7888783],[-8.1115658,9.7880736],[-8.1116738,9.7874057],[-8.1119336,9.7872311],[-8.112633,9.7872997],[-8.1130899,9.7870354],[-8.1132628,9.7865602],[-8.11332,9.7859697],[-8.1131623,9.7851566],[-8.1129891,9.7843659],[-8.111653,9.7838275],[-8.111336,9.7835234],[-8.1111101,9.7826717],[-8.1111134,9.7824438],[-8.1115994,9.7820984],[-8.1120912,9.7821617],[-8.1123519,9.7818557],[-8.1123873,9.7812888],[-8.1120382,9.7805402],[-8.1114389,9.7800743],[-8.1112441,9.7796656],[-8.1111174,9.7789822],[-8.1112077,9.7786038],[-8.1116743,9.7781846],[-8.1120211,9.777658],[-8.1119713,9.7772361],[-8.1113438,9.7765793],[-8.110373,9.7753727],[-8.1099061,9.7750179],[-8.109364,9.7747606],[-8.1086405,9.7749596],[-8.1081649,9.7749171],[-8.1078183,9.7746547],[-8.1074611,9.7734652],[-8.1070887,9.7729783],[-8.1065724,9.7725362],[-8.1058141,9.7708339],[-8.1057091,9.7700279],[-8.1057601,9.7693089],[-8.1057061,9.7679719],[-8.105505,9.7666171],[-8.1050518,9.7655395],[-8.1043643,9.7647156],[-8.1028139,9.7635852],[-8.1017861,9.7629793],[-8.1017507,9.7625993],[-8.102065,9.762363],[-8.102892,9.762266],[-8.1042196,9.7615805],[-8.104613,9.761252],[-8.1054151,9.7612529],[-8.1065,9.7617323],[-8.1077461,9.7618979],[-8.1088342,9.7624907],[-8.1102483,9.7623786],[-8.1112496,9.7624303],[-8.1133727,9.7618002],[-8.1148056,9.7616189],[-8.1158651,9.7613557],[-8.1172074,9.7613841],[-8.1182573,9.7610217],[-8.1196686,9.7607372],[-8.1209157,9.7605401],[-8.1216083,9.7600868],[-8.1218971,9.7595687],[-8.1218232,9.7590863],[-8.1215734,9.7585339],[-8.1202708,9.7570949],[-8.1181282,9.754777],[-8.1175691,9.7545289],[-8.1165582,9.7546477],[-8.1144255,9.7543273],[-8.1123082,9.7534734],[-8.1113391,9.7532785],[-8.1110252,9.7528908],[-8.1111056,9.7524474],[-8.1124072,9.7501676],[-8.11237,9.7495866],[-8.1125884,9.749332],[-8.1131841,9.7493063],[-8.1135882,9.7490516],[-8.1136663,9.7487913],[-8.1131483,9.7481459],[-8.1130389,9.747656],[-8.1133295,9.7473117],[-8.1137006,9.7471557],[-8.1141919,9.7474835],[-8.1150179,9.7476057],[-8.1156651,9.7473179],[-8.1158281,9.7471209],[-8.1156553,9.746263],[-8.115816,9.7457657],[-8.1162888,9.7454921],[-8.1172622,9.7451403],[-8.1178221,9.7444932],[-8.1186491,9.7442434],[-8.1197622,9.7442812],[-8.120984,9.7437129],[-8.1210701,9.743403],[-8.1206972,9.7427274],[-8.1209031,9.7419586],[-8.1214621,9.7420083],[-8.1220311,9.7418033],[-8.1226021,9.7412425],[-8.1229791,9.7409789],[-8.1228711,9.7406799],[-8.1225481,9.7404497],[-8.12202,9.740449],[-8.1218382,9.7401578],[-8.121985,9.7396131],[-8.121801,9.7389405],[-8.121464,9.7385575],[-8.1208953,9.7382363],[-8.1197301,9.7380247],[-8.1194448,9.7377398],[-8.1192791,9.7370749],[-8.1192957,9.7366251],[-8.1191621,9.736237],[-8.1190544,9.7358802],[-8.1185034,9.7354331],[-8.1179976,9.7352383],[-8.1168866,9.7349479],[-8.1155905,9.7346999],[-8.1152177,9.7341421],[-8.1151454,9.7337106],[-8.1148978,9.7335988],[-8.1144722,9.73359],[-8.1138155,9.7331543],[-8.1134508,9.7330782],[-8.1132832,9.7328027],[-8.1134172,9.7324707],[-8.1136239,9.7322834],[-8.1141297,9.7320746],[-8.1142682,9.7319056],[-8.1142418,9.7313049],[-8.1143879,9.731044],[-8.1146682,9.7309579],[-8.115089,9.7310658],[-8.1154437,9.730989],[-8.1163499,9.7301633],[-8.1168021,9.7300059],[-8.1169741,9.7297719],[-8.1170731,9.7294369],[-8.1168602,9.7290998],[-8.1168703,9.7288256],[-8.1170863,9.7285834],[-8.1175599,9.7284396],[-8.1175703,9.7281318],[-8.1167032,9.7281236],[-8.1160431,9.7277213],[-8.1158177,9.727259],[-8.1156093,9.7266915],[-8.1155244,9.7263554],[-8.1156577,9.7259121],[-8.1156222,9.7253275],[-8.1153799,9.7247098],[-8.1154501,9.7243489],[-8.1158655,9.7244428],[-8.1163638,9.7246538],[-8.1170413,9.7245238],[-8.1174398,9.724065],[-8.1175731,9.7232199],[-8.1171656,9.7225009],[-8.1170366,9.7220698],[-8.1171581,9.7210468],[-8.1170916,9.720059],[-8.1168714,9.7199364],[-8.1161679,9.7200869],[-8.1155589,9.7204043],[-8.1149851,9.7202977],[-8.1144924,9.7199498],[-8.1143237,9.7196304],[-8.1149403,9.7184394],[-8.1150194,9.7177902],[-8.1148045,9.7171629],[-8.1145723,9.7168765],[-8.1145191,9.7165049],[-8.1145681,9.7163239],[-8.1147051,9.7161669],[-8.1146568,9.7160019],[-8.1136829,9.7155166],[-8.1126808,9.7153133],[-8.1121214,9.7149527],[-8.111558,9.7144066],[-8.1114768,9.7141644],[-8.1116477,9.7138591],[-8.1121034,9.7137138],[-8.1123941,9.7134009],[-8.112465,9.7130277],[-8.1123775,9.7127522],[-8.1118476,9.7125898],[-8.1115548,9.7122842],[-8.1114363,9.7119955],[-8.1115185,9.7116828],[-8.1121823,9.7114407],[-8.1126814,9.7115664],[-8.113268,9.7118629],[-8.1138592,9.7118071],[-8.1143477,9.7114103],[-8.1147349,9.7107097],[-8.114856,9.7096216],[-8.1150568,9.7090999],[-8.1148433,9.7087641],[-8.1143863,9.708569],[-8.1141345,9.7080295],[-8.1137933,9.7076536],[-8.1130178,9.7070183],[-8.1125679,9.7064007],[-8.1121108,9.7060215],[-8.1119542,9.7056565],[-8.1120667,9.7051998],[-8.112591,9.7048107],[-8.1130192,9.7046101],[-8.1136746,9.7046795],[-8.1140925,9.704532],[-8.1144124,9.7043186],[-8.1149861,9.7032599],[-8.1150601,9.7028049],[-8.1148497,9.702701],[-8.1143623,9.7026415],[-8.1141636,9.7027199],[-8.1135935,9.702287],[-8.113601,9.7020556],[-8.1140902,9.7016017],[-8.114561,9.7014599],[-8.1151791,9.7010209],[-8.1154681,9.7011833],[-8.1155347,9.7013558],[-8.11524,9.7016616],[-8.1151604,9.7019216],[-8.1153219,9.7020935],[-8.1159001,9.7022949],[-8.1161531,9.7022145],[-8.1162449,9.7019812],[-8.1164291,9.7019619],[-8.116844,9.7022225],[-8.1170637,9.7022284],[-8.1172202,9.7020876],[-8.1171785,9.7018548],[-8.1170216,9.7015373],[-8.1170392,9.7013188],[-8.117329,9.7011148],[-8.1176175,9.7010294],[-8.118354,9.7009584],[-8.1185901,9.7007984],[-8.1192166,9.7009115],[-8.1195136,9.7006854],[-8.1194623,9.7003841],[-8.1199341,9.7001068],[-8.1200819,9.700283],[-8.1200445,9.7006323],[-8.1202461,9.7009181],[-8.1205041,9.7010365],[-8.1208587,9.7009728],[-8.1211332,9.7007641],[-8.121438,9.700344],[-8.1218111,9.7001229],[-8.1217849,9.6999923],[-8.1215705,9.6998871],[-8.121039,9.7000243],[-8.1209074,9.699999],[-8.1208222,9.6997799],[-8.1208572,9.6995653],[-8.1212034,9.6990258],[-8.1215231,9.6989309],[-8.1223085,9.6989731],[-8.1227848,9.6986014],[-8.1231215,9.6987235],[-8.1232828,9.6989082],[-8.1235172,9.6993651],[-8.1240889,9.6996152],[-8.1243587,9.6994769],[-8.1244996,9.6991813],[-8.1245549,9.6986226],[-8.1243747,9.6979284],[-8.1245243,9.6969942],[-8.1243654,9.6961053],[-8.1251163,9.6947536],[-8.125117,9.6945117],[-8.1250281,9.6942199],[-8.1248292,9.6940842],[-8.1242652,9.6940348],[-8.1236324,9.6941679],[-8.1233652,9.6939083],[-8.1232067,9.6934215],[-8.1234064,9.692585],[-8.1243166,9.6917137],[-8.1250655,9.6913682],[-8.1254041,9.6915006],[-8.1257973,9.6918884],[-8.126592,9.6918927],[-8.1270951,9.6917473],[-8.127518,9.6914488],[-8.1275761,9.6911804],[-8.1273451,9.6898953],[-8.1271407,9.6893553],[-8.127377,9.6890175],[-8.1278912,9.6885887],[-8.1278789,9.68812],[-8.1276637,9.6878247],[-8.1271377,9.687678],[-8.1264134,9.6877825],[-8.1249226,9.688813],[-8.1245285,9.6892916],[-8.1241804,9.6893498],[-8.1236508,9.6892408],[-8.1230015,9.6889691],[-8.1227395,9.6886972],[-8.1227427,9.6885443],[-8.1229713,9.6880319],[-8.1228128,9.6868555],[-8.1231426,9.6858371],[-8.1238861,9.6851257],[-8.124141,9.6846087],[-8.1239907,9.6840491],[-8.1243212,9.682923],[-8.124759,9.682254],[-8.1251128,9.6819392],[-8.1252257,9.6814111],[-8.1252627,9.6806828],[-8.1254287,9.6804017],[-8.1257079,9.6800609],[-8.1256975,9.6793988],[-8.1260606,9.6791],[-8.1267455,9.6788406],[-8.1268104,9.6786516],[-8.1266288,9.6784434],[-8.1261528,9.6784052],[-8.1254581,9.6785728],[-8.1241552,9.6777903],[-8.1232303,9.6774077],[-8.1228569,9.6770527],[-8.1224101,9.6764607],[-8.1222202,9.6757079],[-8.1215829,9.6752506],[-8.1215672,9.6750894],[-8.1216601,9.6749348],[-8.122207,9.6747149],[-8.1223893,9.6744565],[-8.1224067,9.6740141],[-8.1220519,9.6732039],[-8.121695,9.6727043],[-8.1211265,9.6724172],[-8.1208355,9.6721126],[-8.1201804,9.6716606],[-8.1200092,9.6712132],[-8.1192831,9.6709519],[-8.1188421,9.6712129],[-8.1184694,9.6711774],[-8.1182233,9.6708726],[-8.1181831,9.669641],[-8.118172,9.6695147],[-8.1184767,9.6687757],[-8.119114,9.6681967],[-8.1191944,9.6680031],[-8.1189817,9.667304],[-8.1192355,9.666723],[-8.1197401,9.666566],[-8.1205566,9.6667369],[-8.1211294,9.6664965],[-8.1214033,9.6659689],[-8.1219748,9.6658553],[-8.1234342,9.6660202],[-8.1237614,9.6659255],[-8.1237312,9.6654921],[-8.1240886,9.6651917],[-8.1245179,9.665191],[-8.1249971,9.6655196],[-8.1250929,9.6659392],[-8.1257903,9.6659395],[-8.1265971,9.6654755],[-8.1268522,9.6652495],[-8.126953,9.6649053],[-8.1267661,9.6643319],[-8.125715,9.6630615],[-8.125141,9.662767],[-8.1238314,9.6625412],[-8.1233823,9.6627948],[-8.1225797,9.6625752],[-8.1214506,9.6618427],[-8.119257,9.6607117],[-8.118531,9.6600566],[-8.1183436,9.6595551],[-8.1182629,9.6574692],[-8.1183672,9.6566724],[-8.1174002,9.6560232],[-8.1168504,9.6555136],[-8.1164534,9.6552837],[-8.1164975,9.655044],[-8.1169703,9.6550489],[-8.1171263,9.6547559],[-8.116977,9.6544171],[-8.1159631,9.6539039],[-8.115114,9.6539102],[-8.1151012,9.6536933],[-8.1159011,9.6527879],[-8.1156967,9.6510383],[-8.1159557,9.650449],[-8.1163742,9.6500799],[-8.116307,9.6495138],[-8.1166773,9.6488764],[-8.1177367,9.64906],[-8.1183697,9.6492345],[-8.1190465,9.6490367],[-8.1194435,9.6492645],[-8.1196971,9.6490211],[-8.1196022,9.648338],[-8.1191531,9.6480306],[-8.1190146,9.6474227],[-8.11913,9.6470352],[-8.1194051,9.6467318],[-8.1198121,9.646621],[-8.1201038,9.6462983],[-8.1200558,9.6457506],[-8.1203405,9.6455712],[-8.120795,9.6456121],[-8.1213201,9.645561],[-8.1218118,9.6447657],[-8.1227182,9.6444447],[-8.122955,9.6437864],[-8.1231405,9.6437019],[-8.1235528,9.6439825],[-8.1239254,9.6437974],[-8.1243197,9.6437461],[-8.1246112,9.6434482],[-8.1247134,9.6427981],[-8.1245198,9.6425971],[-8.1239417,9.6426261],[-8.1235693,9.6424484],[-8.1231171,9.6418719],[-8.1223582,9.6411465],[-8.121716,9.6409725],[-8.1213411,9.6406155],[-8.1211447,9.6400529],[-8.1211291,9.6395333],[-8.1215981,9.6389565],[-8.1217679,9.6385875],[-8.121979,9.6384706],[-8.1223125,9.638677],[-8.1222907,9.6392902],[-8.1226767,9.6395939],[-8.1231137,9.6394703],[-8.1233965,9.6390297],[-8.1233983,9.6384009],[-8.1238893,9.6380854],[-8.1239154,9.6373869],[-8.1236121,9.637043],[-8.1233669,9.636487],[-8.1241635,9.6361506],[-8.1243013,9.6356034],[-8.1232685,9.6346429],[-8.1233307,9.6338084],[-8.1237317,9.6333512],[-8.1250281,9.6327382],[-8.1258607,9.6329501],[-8.1260859,9.633593],[-8.1264941,9.6339657],[-8.1270414,9.6337018],[-8.1279638,9.6330855],[-8.1282543,9.6322008],[-8.1286073,9.6317984],[-8.1295133,9.6320077],[-8.1306277,9.6316916],[-8.131783,9.630391],[-8.1340031,9.6284523],[-8.1344977,9.6275487],[-8.1346551,9.6264919],[-8.1338768,9.6254611],[-8.1326982,9.6243518],[-8.1318571,9.6238194],[-8.1321399,9.6233258],[-8.1333106,9.6230725],[-8.1345329,9.6224797],[-8.1352309,9.6223024],[-8.1356847,9.6230898],[-8.1361225,9.6230296],[-8.1366401,9.6232234],[-8.1380392,9.6246722],[-8.1383341,9.6258794],[-8.1390973,9.6268394],[-8.1397331,9.6273096],[-8.1406237,9.6277085],[-8.1413397,9.6277512],[-8.142376,9.6275],[-8.1434827,9.6267598],[-8.1443117,9.6258813],[-8.1449056,9.6248505],[-8.1452743,9.6228385],[-8.1452057,9.6221835],[-8.1447577,9.6216804],[-8.1442432,9.6214922],[-8.1428437,9.6220669],[-8.1422307,9.6220004],[-8.1415422,9.6222332],[-8.1410689,9.6221029],[-8.1412777,9.6210386],[-8.1409568,9.6204749],[-8.1403793,9.6204938],[-8.1396305,9.6202553],[-8.1394753,9.6199291],[-8.139583,9.6190405],[-8.1393142,9.6186122],[-8.1380529,9.6179695],[-8.1371534,9.6175872],[-8.1364483,9.6175125],[-8.1356098,9.6176183],[-8.1349086,9.617499],[-8.1347013,9.6165979],[-8.1342681,9.6157631],[-8.1341225,9.6146168],[-8.1333601,9.613974],[-8.1332624,9.6138985],[-8.1330711,9.6131186],[-8.1330619,9.6127038],[-8.1336907,9.6126699],[-8.1339772,9.6124973],[-8.1339976,9.6118661],[-8.1343355,9.6109573],[-8.1347657,9.6106552],[-8.1351162,9.6110138],[-8.1353452,9.6110833],[-8.1355674,9.6108877],[-8.1356753,9.6104583],[-8.1357007,9.6096903],[-8.1359185,9.6095209],[-8.1363371,9.6095314],[-8.1369119,9.6098602],[-8.1376099,9.6093431],[-8.1380675,9.6082855],[-8.1384643,9.6081848],[-8.1389471,9.6091164],[-8.1392309,9.6091421],[-8.1400447,9.6084154],[-8.1400313,9.6080248],[-8.1402461,9.6065947],[-8.1405844,9.6061219],[-8.1408641,9.6053785],[-8.1404679,9.604939],[-8.1403483,9.6045173],[-8.1399047,9.6040299],[-8.1401183,9.6031229],[-8.1405401,9.6030287],[-8.1410816,9.6035118],[-8.1413782,9.6036042],[-8.1422665,9.6031193],[-8.1421175,9.6028023],[-8.1409247,9.6024961],[-8.1411459,9.6017089],[-8.1415661,9.600949],[-8.1414996,9.6001505],[-8.1418363,9.5999485],[-8.1417608,9.5993837],[-8.1415042,9.5992861],[-8.1413656,9.5990601],[-8.1415161,9.5988149],[-8.1421407,9.5988206],[-8.142617,9.5981421],[-8.142237,9.5977347],[-8.1423105,9.5973224],[-8.1425891,9.5970069],[-8.1434851,9.5966979],[-8.1436245,9.5959762],[-8.1435477,9.5954822],[-8.1433071,9.5954409],[-8.1429751,9.595853],[-8.1424067,9.5958064],[-8.1420295,9.5953818],[-8.1417563,9.5952131],[-8.1414365,9.5947792],[-8.1416697,9.5945391],[-8.1421803,9.5947102],[-8.142734,9.5944719],[-8.1431801,9.593309],[-8.1437539,9.5929114],[-8.1439797,9.5922832],[-8.1438799,9.5914324],[-8.1438897,9.5903834],[-8.1441754,9.5899763],[-8.1448735,9.5900041],[-8.1453623,9.5897666],[-8.1449949,9.5886235],[-8.1447325,9.5882288],[-8.1447349,9.5879358],[-8.1445437,9.5877276],[-8.1442605,9.5877766],[-8.1441853,9.5882999],[-8.1438041,9.5885416],[-8.1435215,9.5883666],[-8.1432136,9.5875575],[-8.1425165,9.5868451],[-8.1423001,9.5864568],[-8.1426104,9.5860949],[-8.1435261,9.5858099],[-8.1437121,9.5850219],[-8.1436061,9.5846699],[-8.2426905,9.5854986],[-8.3537457,9.5785982],[-8.3917783,9.563897],[-8.4365047,9.5296916],[-8.4593243,9.5401936],[-8.4845779,9.5413939],[-8.4937057,9.531492],[-8.4833609,9.5110873],[-8.4970526,9.489781],[-8.5140912,9.4951827],[-8.522002,9.4870802],[-8.5329554,9.4726751],[-8.5414747,9.483779],[-8.5539494,9.4759763],[-8.5576005,9.4432628],[-8.577986,9.4399613],[-8.5843755,9.4339584],[-8.5910692,9.4543678],[-8.6053695,9.4624711],[-8.6151242,9.4935934],[-8.6158942,9.4933255],[-8.6169407,9.4932083],[-8.6183145,9.4923106],[-8.6185298,9.4917829],[-8.6185283,9.4905953],[-8.6190542,9.4893179],[-8.6204692,9.4877544],[-8.6212818,9.4862582],[-8.6217852,9.4850308],[-8.6218502,9.4829801],[-8.6215735,9.4812641],[-8.6215241,9.4800413],[-8.621823,9.4792204],[-8.6225674,9.4781212],[-8.6227291,9.4774707],[-8.6223836,9.4768919],[-8.6208017,9.4761783],[-8.6196204,9.4744075],[-8.6188665,9.472466],[-8.6182637,9.4702417],[-8.6182937,9.4697382],[-8.6185419,9.4693691],[-8.6191559,9.4692103],[-8.619979,9.469177],[-8.6243809,9.4704847],[-8.6267402,9.4699203],[-8.6278773,9.469339],[-8.6282021,9.4687173],[-8.6280702,9.4671602],[-8.6271997,9.4649189],[-8.6268615,9.4643575],[-8.6269267,9.4637134],[-8.6279733,9.4610761],[-8.6284668,9.4600964],[-8.6304135,9.459126],[-8.6323389,9.458519],[-8.6340365,9.4582869],[-8.6350747,9.4584043],[-8.6363692,9.4561722],[-8.6365716,9.4556188],[-8.6365183,9.4551058],[-8.6344651,9.4534944],[-8.6308342,9.4499573],[-8.6303874,9.4491832],[-8.6301707,9.4478435],[-8.6289725,9.4454945],[-8.6270205,9.443496],[-8.6256391,9.4413489],[-8.6248156,9.4404475],[-8.6244255,9.4387809],[-8.6249339,9.4379208],[-8.6260151,9.4368919],[-8.626889,9.4352791],[-8.628394,9.4334564],[-8.6289338,9.4331316],[-8.6297882,9.4331047],[-8.6306639,9.4333854],[-8.6311886,9.4330798],[-8.6318764,9.4319066],[-8.6319853,9.4312117],[-8.6316474,9.4303978],[-8.6307521,9.4292789],[-8.630397,9.4282288],[-8.6302833,9.4266754],[-8.6305313,9.424968],[-8.6309019,9.4236721],[-8.630784,9.4229134],[-8.6299499,9.4213779],[-8.6281145,9.4190358],[-8.6265102,9.4175649],[-8.6258467,9.4168582],[-8.6255433,9.4160921],[-8.6253959,9.4131221],[-8.624846,9.4123698],[-8.6245188,9.4118698],[-8.6245886,9.4108939],[-8.625243,9.4097987],[-8.6249431,9.4090552],[-8.6243334,9.4085946],[-8.6238543,9.4083769],[-8.6237088,9.4080261],[-8.6238469,9.4076811],[-8.6240977,9.4075089],[-8.6247672,9.407654],[-8.6263358,9.4089436],[-8.6268271,9.4096647],[-8.6272569,9.4098103],[-8.6277495,9.4094534],[-8.627939,9.4076431],[-8.6279749,9.4060799],[-8.6278801,9.4049338],[-8.6282425,9.4026692],[-8.6286016,9.4018608],[-8.629324,9.4006877],[-8.6294374,9.3998252],[-8.6292158,9.3988884],[-8.6288939,9.3984519],[-8.6291415,9.3981655],[-8.6298164,9.3980099],[-8.6306792,9.398262],[-8.6310639,9.3987225],[-8.6314264,9.3999337],[-8.6322339,9.4007184],[-8.6333795,9.4012374],[-8.6351392,9.4011464],[-8.6363164,9.4011912],[-8.6364768,9.4006047],[-8.63565,9.3993346],[-8.6342596,9.3977171],[-8.6332951,9.3964203],[-8.6319987,9.3950677],[-8.631525,9.3943513],[-8.6310805,9.3944089],[-8.6307518,9.3948641],[-8.6307174,9.3959308],[-8.6303115,9.3961266],[-8.6290162,9.395519],[-8.6273268,9.3954546],[-8.6259818,9.3956186],[-8.6252265,9.3952555],[-8.6247172,9.3946167],[-8.6243311,9.3935126],[-8.6232749,9.3924331],[-8.6220074,9.3912467],[-8.6213752,9.3893948],[-8.620496,9.3882514],[-8.6195862,9.3875546],[-8.6184988,9.3875645],[-8.6181441,9.3872962],[-8.6180867,9.3868327],[-8.6183801,9.3862022],[-8.6195541,9.3849684],[-8.6203961,9.3844697],[-8.6215162,9.384249],[-8.6225925,9.3841764],[-8.624184,9.3835861],[-8.624932,9.3834636],[-8.6260683,9.3835571],[-8.6267681,9.3833217],[-8.6272996,9.3826972],[-8.6279787,9.3809515],[-8.627994,9.380046],[-8.6275762,9.3791962],[-8.6267638,9.3781424],[-8.6264496,9.3774834],[-8.6252086,9.3760394],[-8.6245184,9.3756855],[-8.6239535,9.3756527],[-8.6233879,9.3759217],[-8.6226472,9.3773156],[-8.6216479,9.377819],[-8.6205923,9.3777908],[-8.6198958,9.3772323],[-8.6196377,9.3766303],[-8.619695,9.3758783],[-8.6209263,9.3743091],[-8.6212463,9.3728574],[-8.6212184,9.3720635],[-8.6209776,9.371356],[-8.6197754,9.3700055],[-8.6193982,9.3688353],[-8.6192714,9.3679676],[-8.6206839,9.3659974],[-8.621301,9.364404],[-8.6216989,9.3627653],[-8.6215762,9.3612631],[-8.6213722,9.3602119],[-8.6215949,9.3588434],[-8.6220305,9.3572647],[-8.6220784,9.3562153],[-8.6217968,9.3537993],[-8.6217157,9.3507838],[-8.6219793,9.3502496],[-8.6224054,9.3497168],[-8.6228065,9.3495917],[-8.6247734,9.3497664],[-8.6257125,9.3502012],[-8.6260471,9.3502333],[-8.6262412,9.349918],[-8.6262788,9.3493675],[-8.6251271,9.3480346],[-8.6248921,9.3472757],[-8.6248936,9.3460557],[-8.6244316,9.3449716],[-8.6235267,9.3435853],[-8.6229686,9.3433299],[-8.6225419,9.3434945],[-8.621549,9.3443878],[-8.6203491,9.3444962],[-8.6194497,9.3442117],[-8.6189887,9.3437725],[-8.6186997,9.3429966],[-8.6188115,9.3421339],[-8.6191493,9.3413143],[-8.6198816,9.3404203],[-8.6207719,9.3399532],[-8.6214868,9.3398134],[-8.6217471,9.3394373],[-8.6217193,9.3385728],[-8.6205593,9.336098],[-8.6202198,9.3350877],[-8.620141,9.3338699],[-8.6203737,9.3327252],[-8.6207657,9.3318314],[-8.6216273,9.33116],[-8.6223393,9.3300915],[-8.622619,9.3288929],[-8.6225259,9.3285646],[-8.6220165,9.3284812],[-8.6202232,9.3290649],[-8.6177092,9.329125],[-8.6160062,9.3295191],[-8.6151574,9.3295358],[-8.6149662,9.3293484],[-8.6150407,9.3288888],[-8.6161393,9.3275769],[-8.6171894,9.3260269],[-8.617226,9.3256535],[-8.6170934,9.3252059],[-8.616092,9.3242447],[-8.6158105,9.3234922],[-8.6153536,9.3229125],[-8.6147019,9.3226514],[-8.6141191,9.322699],[-8.6135314,9.3232372],[-8.6123864,9.3244674],[-8.6117755,9.3246824],[-8.6114352,9.324344],[-8.6114943,9.3228225],[-8.6104308,9.3212102],[-8.6105509,9.3185162],[-8.6107711,9.3179218],[-8.6118133,9.3167088],[-8.6122361,9.3157438],[-8.6123458,9.3148343],[-8.6121506,9.3135877],[-8.6117549,9.3126128],[-8.6113521,9.3093748],[-8.6113313,9.3081884],[-8.61078,9.3065344],[-8.6108422,9.3058302],[-8.6131528,9.3046994],[-8.6140242,9.3040316],[-8.6146039,9.3033454],[-8.6170169,9.3018527],[-8.6177827,9.3011016],[-8.6183226,9.2998389],[-8.6189248,9.2996878],[-8.6198244,9.2999066],[-8.6203681,9.3006217],[-8.6209619,9.3016148],[-8.6217973,9.3022407],[-8.622476,9.3024893],[-8.6229196,9.3024755],[-8.6233507,9.3022266],[-8.6234844,9.3018469],[-8.6231818,9.3008412],[-8.6222716,9.2990072],[-8.6215527,9.2977287],[-8.6212153,9.2964513],[-8.6212476,9.2957856],[-8.6214892,9.2946524],[-8.6226841,9.2924603],[-8.6236645,9.2909107],[-8.6242782,9.2895708],[-8.6246164,9.2884842],[-8.6249659,9.2878405],[-8.6254352,9.2876109],[-8.6262178,9.2874863],[-8.6273826,9.2868131],[-8.6282877,9.2858842],[-8.6294947,9.2857309],[-8.6303417,9.2849977],[-8.6308211,9.2849397],[-8.6313613,9.2854571],[-8.6315755,9.2861958],[-8.6312145,9.2871435],[-8.6306341,9.2879688],[-8.6301163,9.2885343],[-8.6297525,9.2912832],[-8.6299191,9.2919596],[-8.6309165,9.2927495],[-8.6317441,9.2929185],[-8.6328102,9.2928235],[-8.6338108,9.2919933],[-8.6341165,9.2908769],[-8.6344809,9.2902135],[-8.6367344,9.2880968],[-8.6374343,9.2866491],[-8.6375076,9.2858647],[-8.6358401,9.2837287],[-8.6331872,9.2813751],[-8.6328693,9.2803425],[-8.6320081,9.2790346],[-8.631949,9.277824],[-8.6323287,9.2769664],[-8.6330466,9.2759524],[-8.6348366,9.2759935],[-8.6358226,9.2746339],[-8.6367745,9.2725975],[-8.6365995,9.2721641],[-8.6349801,9.2713033],[-8.6334941,9.271365],[-8.6331227,9.2712289],[-8.6327511,9.2707256],[-8.6328444,9.2694669],[-8.633174,9.2683734],[-8.6349285,9.2673621],[-8.6360425,9.2671057],[-8.6373489,9.2671507],[-8.6384224,9.2670166],[-8.6404573,9.2662655],[-8.6412483,9.2657239],[-8.6424692,9.2645603],[-8.6431134,9.2639101],[-8.6440291,9.2634191],[-8.6455441,9.2638878],[-8.6473584,9.2648781],[-8.6478386,9.2655504],[-8.648321,9.2655605],[-8.6492953,9.2649626],[-8.6498634,9.2643709],[-8.6499968,9.2639486],[-8.6498985,9.2630576],[-8.6499197,9.261951],[-8.6496759,9.2613977],[-8.648669,9.2605934],[-8.6480616,9.2602187],[-8.6466401,9.2603295],[-8.6453446,9.2597006],[-8.6454249,9.2592033],[-8.6456815,9.2588343],[-8.6467747,9.2581361],[-8.6470096,9.2577292],[-8.6469618,9.257127],[-8.6464061,9.2563607],[-8.6457713,9.2558455],[-8.6451799,9.255024],[-8.6442152,9.2541415],[-8.6429527,9.252004],[-8.6425013,9.2500827],[-8.6425098,9.2494246],[-8.6420903,9.2488894],[-8.6403028,9.2477381],[-8.6402324,9.2474485],[-8.6405769,9.2469655],[-8.6411712,9.2465656],[-8.6420693,9.2443676],[-8.642865,9.2438468],[-8.6437893,9.2437327],[-8.6453377,9.2442],[-8.6485813,9.2419724],[-8.6499994,9.238162],[-8.6498812,9.2366068],[-8.6479116,9.2340795],[-8.6477934,9.2321354],[-8.6484631,9.2309689],[-8.6482267,9.2292192],[-8.6498024,9.2280528],[-8.6509448,9.2282472],[-8.6529538,9.2295692],[-8.6542537,9.2287138],[-8.6552779,9.2266141],[-8.6554749,9.2251755],[-8.6547658,9.2236979],[-8.6551203,9.2232702],[-8.6577202,9.2245922],[-8.6588626,9.2238535],[-8.659611,9.2230369],[-8.6595323,9.2209761],[-8.6607928,9.2184487],[-8.6626442,9.2164657],[-8.6643775,9.2158435],[-8.6657562,9.2154547],[-8.6666622,9.2140938],[-8.6673713,9.2125384],[-8.6669774,9.2117218],[-8.6648108,9.2107497],[-8.6635896,9.2119163],[-8.6622897,9.2120329],[-8.6621715,9.2104387],[-8.6609898,9.2102054],[-8.6601231,9.2109053],[-8.6589808,9.2097387],[-8.6579172,9.2090777],[-8.6573263,9.2073668],[-8.6579566,9.2035172],[-8.6579566,9.2019229],[-8.6575233,9.200873],[-8.6581141,9.1998231],[-8.660911,9.1983455],[-8.6624867,9.1963623],[-8.6615019,9.1949235],[-8.6597686,9.1949235],[-8.6575233,9.1962068],[-8.6567354,9.1957012],[-8.6572475,9.1944958],[-8.6598868,9.1927848],[-8.6605564,9.191346],[-8.6624867,9.1910349],[-8.6641805,9.1906849],[-8.6648896,9.1897905],[-8.6653229,9.1882351],[-8.6651653,9.1869129],[-8.6665834,9.1852797],[-8.6671743,9.1831798],[-8.6674501,9.1811965],[-8.6693015,9.1811965],[-8.6708378,9.1822465],[-8.6711529,9.1812743],[-8.670562,9.1801466],[-8.6682379,9.17828],[-8.6677258,9.1772689],[-8.6679622,9.1767633],[-8.6693803,9.1773855],[-8.6715074,9.17618],[-8.6731619,9.1760245],[-8.6748952,9.1765689],[-8.6775738,9.1761411],[-8.6795434,9.1781244],[-8.6809616,9.1777355],[-8.6810797,9.1747023],[-8.6795828,9.1737301],[-8.6775344,9.1736134],[-8.676786,9.1728745],[-8.6772981,9.1719023],[-8.6798192,9.1712801],[-8.6807646,9.1722912],[-8.682813,9.1729912],[-8.6861613,9.1725245],[-8.6873431,9.1722134],[-8.6907308,9.1719412],[-8.6921489,9.1706579],[-8.6923459,9.1696079],[-8.6916762,9.1675857],[-8.6920307,9.1647857],[-8.692661,9.1629967],[-8.6944336,9.1623356],[-8.694867,9.1615967],[-8.6953003,9.1603134],[-8.6974668,9.1580578],[-8.6980577,9.1545187],[-8.6995546,9.1522242],[-8.7010909,9.1509019],[-8.701406,9.149463],[-8.7021589,9.147999],[-8.7040059,9.1468573],[-8.7046587,9.1459547],[-8.7053176,9.1445823],[-8.707399,9.1444552],[-8.7077088,9.1424236],[-8.7076446,9.1419797],[-8.7074685,9.140763],[-8.7078603,9.1400063],[-8.7083538,9.1377713],[-8.7090087,9.1355397],[-8.7099427,9.1300955],[-8.7107026,9.1270222],[-8.7112167,9.1262601],[-8.7126008,9.1262072],[-8.7128422,9.1243845],[-8.7127322,9.1236086],[-8.7128298,9.1228995],[-8.7132237,9.1193601],[-8.7131471,9.1155755],[-8.7126507,9.1145859],[-8.7126676,9.1138697],[-8.7130332,9.1128561],[-8.7132041,9.1120783],[-8.7131814,9.1116191],[-8.7126056,9.1097927],[-8.7127438,9.1088283],[-8.7129336,9.1066792],[-8.7135669,9.1055266],[-8.7134821,9.1049813],[-8.7128047,9.1044491],[-8.7124681,9.1039368],[-8.7118907,9.1036199],[-8.7113697,9.103794],[-8.7104703,9.1047496],[-8.709923,9.105214],[-8.7092296,9.1061055],[-8.7088674,9.1063092],[-8.7072712,9.1062732],[-8.7068914,9.105535],[-8.7070165,9.1050969],[-8.7072903,9.1046587],[-8.707912,9.1044793],[-8.7082899,9.1042122],[-8.7093949,9.1026783],[-8.7136891,9.1013683],[-8.7151655,9.1013173],[-8.7154851,9.1007015],[-8.7155741,9.0997235],[-8.7157276,9.0989536],[-8.7156853,9.0982197],[-8.7155139,9.0977151],[-8.7147055,9.0971487],[-8.7147206,9.0967802],[-8.7158558,9.0959406],[-8.717206,9.0956614],[-8.7182048,9.0950845],[-8.7185628,9.0944948],[-8.7186176,9.0937813],[-8.718412,9.0928909],[-8.7185332,9.0912617],[-8.7184768,9.0899718],[-8.7186311,9.0882105],[-8.7184871,9.0877094],[-8.7182115,9.0873197],[-8.7165601,9.0862167],[-8.7163694,9.08593],[-8.7165027,9.0855368],[-8.7169916,9.0851795],[-8.7178662,9.0850115],[-8.719502,9.0842362],[-8.7196427,9.0839596],[-8.7196852,9.0835042],[-8.7189305,9.0814641],[-8.7179134,9.0794452],[-8.717822,9.0790035],[-8.7180887,9.0782614],[-8.7184516,9.0765656],[-8.7182382,9.0757022],[-8.7177691,9.0747657],[-8.7179027,9.0744863],[-8.7182339,9.074384],[-8.7190166,9.0749569],[-8.7194496,9.0754423],[-8.7200387,9.0767155],[-8.7207954,9.0790335],[-8.7210602,9.0792155],[-8.7216991,9.0790536],[-8.7220567,9.0787297],[-8.7219858,9.0768728],[-8.7216891,9.075759],[-8.7217877,9.0753141],[-8.7229655,9.0738951],[-8.7235284,9.0735294],[-8.7234901,9.0727268],[-8.7233402,9.071822],[-8.7227086,9.071499],[-8.7221084,9.0715092],[-8.7213243,9.0719256],[-8.7201019,9.0716716],[-8.7196882,9.071371],[-8.7190842,9.0711264],[-8.7190726,9.0708797],[-8.7195255,9.0698643],[-8.7195137,9.0695882],[-8.7191696,9.0693075],[-8.7188626,9.0688856],[-8.7187577,9.0685869],[-8.7192678,9.065767],[-8.7198036,9.063975],[-8.7206435,9.0622757],[-8.7215707,9.0615481],[-8.7217281,9.061173],[-8.7214634,9.0607913],[-8.7197272,9.0598394],[-8.7192425,9.0597454],[-8.7189476,9.0595926],[-8.7188431,9.0591344],[-8.7189272,9.0582884],[-8.7194028,9.0574261],[-8.7203468,9.0565147],[-8.7202876,9.0558677],[-8.7200227,9.0556775],[-8.719362,9.0557212],[-8.7186383,9.0563042],[-8.7181952,9.0569286],[-8.7170279,9.0576085],[-8.7167652,9.05849],[-8.7163466,9.0588445],[-8.7156346,9.0590324],[-8.7146277,9.0587953],[-8.7126132,9.0579122],[-8.7120099,9.0574792],[-8.7118286,9.0571057],[-8.7116262,9.0562394],[-8.7114108,9.0558573],[-8.7111753,9.0556186],[-8.7110532,9.0552869],[-8.7113491,9.054794],[-8.7120493,9.0540888],[-8.7126141,9.0538852],[-8.7132276,9.0538174],[-8.7141163,9.053911],[-8.7153024,9.0544725],[-8.7159767,9.0550722],[-8.7162891,9.0550051],[-8.716755,9.0544279],[-8.7169886,9.053804],[-8.7169089,9.0530496],[-8.7165981,9.0514832],[-8.7165625,9.0510169],[-8.7162465,9.0507638],[-8.7150735,9.0504844],[-8.7138146,9.0497208],[-8.7123953,9.0482772],[-8.7115425,9.0470071],[-8.7109245,9.0459803],[-8.7094946,9.0445853],[-8.7093712,9.0442356],[-8.7095036,9.0437434],[-8.7101608,9.0427341],[-8.7104505,9.0424945],[-8.7108592,9.0413069],[-8.7114319,9.0405528],[-8.7122195,9.0401073],[-8.7128846,9.0399409],[-8.713467,9.040071],[-8.7155494,9.0400684],[-8.7168713,9.0402512],[-8.7179054,9.0405951],[-8.7184995,9.0409335],[-8.7188729,9.0408541],[-8.7193461,9.0399126],[-8.7200278,9.03914],[-8.7201572,9.0381723],[-8.7200542,9.0372834],[-8.7201279,9.0365995],[-8.7200297,9.0357196],[-8.7201922,9.0345465],[-8.7205021,9.0339808],[-8.7212072,9.0330633],[-8.7213868,9.0319127],[-8.7213271,9.0312386],[-8.721457,9.0306458],[-8.7219714,9.0296388],[-8.72219,9.0286811],[-8.7221253,9.0278297],[-8.7219471,9.0273158],[-8.7218295,9.0263902],[-8.721431,9.0252695],[-8.7216072,9.0247519],[-8.7219237,9.02431],[-8.7225903,9.0237357],[-8.7228519,9.0230203],[-8.7235286,9.0208452],[-8.7238084,9.0192413],[-8.7243827,9.0183043],[-8.7929734,8.9498545],[-8.819241,8.9366356],[-8.8495382,8.9542408],[-8.8613683,8.9611147],[-8.8829569,8.9599924],[-8.8990351,8.9591564],[-8.9347194,8.9395732],[-8.9580133,8.9165615],[-8.9793248,8.8666162],[-9.0288863,8.8734718],[-9.0715093,8.8617192],[-9.158242,8.841641],[-9.2117685,8.8543737],[-9.2885889,8.9062792],[-9.3336899,8.924885],[-9.400598,8.9704164],[-9.467506,8.9811864],[-9.5051728,9.009089],[-9.5354054,9.0575464],[-9.5720809,9.0727186],[-9.5880537,9.0991481],[-9.5904187,9.103061],[-9.5924011,9.1402515],[-9.5557256,9.1813522],[-9.5349097,9.2126638],[-9.5542388,9.2327213],[-9.5973573,9.2405484],[-9.6607961,9.2439726],[-9.7108532,9.2909307],[-9.7113489,9.3075602],[-9.6925155,9.3584219],[-9.6811163,9.37896],[-9.6806207,9.4425229],[-9.6558399,9.4757665],[-9.6556507,9.4757911],[-9.5839757,9.4850546],[-9.5354054,9.5119397],[-9.529458,9.5412666],[-9.5458133,9.5647262],[-9.5864538,9.5705909],[-9.5904187,9.609686],[-9.6315548,9.575478],[-9.6751689,9.5764554],[-9.7083752,9.5627713],[-9.7519893,9.5823199],[-9.8114632,9.5696134],[-9.8595379,9.599424],[-9.9289225,9.6724057],[-9.955946,9.6690966],[-9.9914539,9.7025982],[-10.0179823,9.7127313],[-10.0907663,9.7182005],[-10.1466533,9.7121389],[-10.1724375,9.7034101],[-10.2068534,9.663235],[-10.2448739,9.6059479],[-10.2753231,9.5951205],[-10.3076116,9.5997326],[-10.3313166,9.6031187],[-10.3763099,9.6084891],[-10.38546,9.6095813],[-10.3920018,9.6103622],[-10.3952151,9.6104789],[-10.3968915,9.6105399],[-10.4071535,9.6109051],[-10.4095885,9.6110016],[-10.4165742,9.6112556],[-10.4167558,9.61142],[-10.4175686,9.6118902],[-10.4179046,9.6125005],[-10.4178829,9.6127314],[-10.41757,9.6131931],[-10.4171554,9.6135713],[-10.416855,9.6137081],[-10.4164874,9.613523],[-10.4162362,9.6136357],[-10.4161075,9.6139254],[-10.4161948,9.6141427],[-10.4164081,9.6144324],[-10.4167213,9.6146335],[-10.4170857,9.6146939],[-10.4174973,9.6143593],[-10.4177575,9.6142604],[-10.4178914,9.6145719],[-10.4175596,9.6151095],[-10.41673,9.6153735],[-10.416442,9.6155796],[-10.4162986,9.6160562],[-10.4163873,9.6165346],[-10.4162375,9.6167375],[-10.4159287,9.6167071],[-10.4148323,9.6156506],[-10.4146175,9.6155357],[-10.4144418,9.6157468],[-10.4145356,9.6164085],[-10.4141846,9.616718],[-10.4138008,9.6173371],[-10.4130034,9.6176154],[-10.4121572,9.6182155],[-10.4116587,9.6182449],[-10.411179,9.6179988],[-10.410148,9.6187834],[-10.4095755,9.6190212],[-10.4087682,9.6194087],[-10.4085587,9.6195472],[-10.4084396,9.6198209],[-10.4084697,9.620203],[-10.4086133,9.620651],[-10.4089543,9.6211713],[-10.4091972,9.6212891],[-10.4095747,9.6212864],[-10.4097556,9.6213909],[-10.4097265,9.6215927],[-10.4094518,9.6217766],[-10.4091507,9.6216674],[-10.4087777,9.6217629],[-10.4083118,9.6217843],[-10.4079364,9.6215027],[-10.4077298,9.6214785],[-10.4074566,9.6218254],[-10.40663,9.621879],[-10.4063329,9.622049],[-10.4060441,9.6226212],[-10.4056321,9.6230125],[-10.4049609,9.6231674],[-10.405,9.6235024],[-10.4054433,9.6236472],[-10.4056289,9.6238391],[-10.4055355,9.6242292],[-10.4049157,9.6246956],[-10.4049137,9.6249517],[-10.4051249,9.6251402],[-10.4054063,9.6256928],[-10.4052507,9.6257763],[-10.4046688,9.6257344],[-10.4044662,9.6259204],[-10.4041374,9.6259785],[-10.403674,9.6258877],[-10.403527,9.6261831],[-10.4037893,9.6264932],[-10.4038862,9.6268316],[-10.4037616,9.6270753],[-10.4034171,9.627387],[-10.4033456,9.6276526],[-10.403578,9.6278952],[-10.4039158,9.6280226],[-10.404658,9.6280199],[-10.4051329,9.6278351],[-10.4054525,9.627974],[-10.405468,9.6281827],[-10.4056707,9.6284559],[-10.4059552,9.6284435],[-10.4061742,9.6281364],[-10.4063511,9.6280556],[-10.4068004,9.6282769],[-10.4069387,9.6284476],[-10.4070369,9.628569],[-10.4070391,9.6289145],[-10.4069552,9.6291772],[-10.4066327,9.6293364],[-10.4058731,9.6295229],[-10.4056145,9.629827],[-10.4056955,9.630435],[-10.4056792,9.6309169],[-10.405431,9.6311116],[-10.4050618,9.6311624],[-10.4046737,9.6309824],[-10.4045154,9.6307329],[-10.4043636,9.6302636],[-10.40448,9.6300909],[-10.4045729,9.6297831],[-10.4043894,9.6296193],[-10.4040733,9.6295678],[-10.4037721,9.6296909],[-10.4036344,9.6298617],[-10.4035628,9.6302159],[-10.4036423,9.6308866],[-10.4033175,9.6311924],[-10.4033173,9.631371],[-10.4036295,9.6317274],[-10.4037439,9.632234],[-10.4036219,9.6327329],[-10.4032812,9.6335708],[-10.4030134,9.6338187],[-10.4029567,9.634012],[-10.4030414,9.6341852],[-10.4039729,9.6349609],[-10.404359,9.6354453],[-10.4052904,9.6362761],[-10.4062947,9.6373735],[-10.406376,9.6379092],[-10.4064305,9.6383405],[-10.4063519,9.6387877],[-10.4059906,9.6396899],[-10.4056992,9.6399293],[-10.4051519,9.6399939],[-10.4048116,9.639933],[-10.4045194,9.6396417],[-10.4041451,9.6394984],[-10.4039312,9.6396637],[-10.4037987,9.6405156],[-10.4034977,9.6417597],[-10.4035909,9.6421202],[-10.4041297,9.6424274],[-10.4047745,9.6423264],[-10.4050839,9.642482],[-10.4052873,9.6426676],[-10.4053927,9.6429828],[-10.4053742,9.6434236],[-10.4051821,9.643664],[-10.4049361,9.6438041],[-10.4047368,9.6437578],[-10.4040328,9.6437658],[-10.4032927,9.6440028],[-10.4030367,9.644196],[-10.4029612,9.644615],[-10.4031356,9.644885],[-10.4034304,9.6450917],[-10.4038896,9.6451114],[-10.4041396,9.6452415],[-10.4042909,9.6456892],[-10.4046075,9.6457922],[-10.4055864,9.6455591],[-10.4058093,9.6456784],[-10.4059633,9.6461802],[-10.4058717,9.6464719],[-10.40575,9.6471462],[-10.4055642,9.6475609],[-10.4051788,9.6478544],[-10.404623,9.6477523],[-10.4044025,9.6480781],[-10.4044684,9.6486616],[-10.4042547,9.6490183],[-10.4039272,9.6491335],[-10.4037946,9.6492956],[-10.4040821,9.6496453],[-10.4043384,9.6497376],[-10.404806,9.6495156],[-10.4050808,9.6496169],[-10.4051962,9.6500393],[-10.40555,9.6503785],[-10.4055927,9.6508947],[-10.4053259,9.6519008],[-10.4049747,9.653011],[-10.4046353,9.6533639],[-10.4042743,9.6535165],[-10.4043436,9.6540363],[-10.4045513,9.6545838],[-10.4048898,9.6550653],[-10.4054516,9.6554679],[-10.4055243,9.6558703],[-10.4052999,9.6561866],[-10.4049181,9.6564878],[-10.4045924,9.6571886],[-10.4042715,9.6574396],[-10.4038448,9.6573278],[-10.4036057,9.6573737],[-10.4035858,9.6576279],[-10.4037227,9.6579122],[-10.4042843,9.6584068],[-10.4049445,9.6585999],[-10.4051127,9.6589182],[-10.4049684,9.6592439],[-10.4045891,9.6594833],[-10.4041742,9.6595183],[-10.4040099,9.6599085],[-10.4040018,9.6602821],[-10.4042453,9.660902],[-10.4045815,9.6610692],[-10.4054801,9.6611529],[-10.4057175,9.6613981],[-10.4056745,9.6616251],[-10.4053974,9.6620226],[-10.4054272,9.6622788],[-10.4059105,9.6624453],[-10.4063641,9.6622372],[-10.4068846,9.6625679],[-10.4069714,9.6632442],[-10.4071252,9.6634752],[-10.4074161,9.6635343],[-10.4079299,9.6632233],[-10.4080568,9.6628995],[-10.4083721,9.6629274],[-10.4085311,9.6632125],[-10.4084365,9.6635873],[-10.4081371,9.6638433],[-10.4078873,9.6642242],[-10.407655,9.6643308],[-10.4072542,9.6643811],[-10.406919,9.6643164],[-10.4067004,9.6641009],[-10.4064599,9.6641584],[-10.4063652,9.6643236],[-10.4061903,9.6655182],[-10.4054483,9.6659906],[-10.4044642,9.6663411],[-10.4034182,9.6667018],[-10.4027329,9.6671437],[-10.4024598,9.6673976],[-10.402501,9.6676872],[-10.4024598,9.6679157],[-10.4025062,9.668063],[-10.4026814,9.6682662],[-10.4029236,9.6684745],[-10.4031091,9.6687437],[-10.4032739,9.6698713],[-10.404423,9.6707094],[-10.4053556,9.6716085],[-10.4061336,9.6722789],[-10.4064273,9.6727158],[-10.4065149,9.6729291],[-10.4065201,9.6731627],[-10.4065098,9.6733151],[-10.40635,9.6734827],[-10.4061439,9.6736097],[-10.4059894,9.6737519],[-10.4058708,9.6739196],[-10.4058245,9.674077],[-10.4058502,9.6744072],[-10.4059894,9.6745595],[-10.4061182,9.6746967],[-10.4062728,9.6747932],[-10.4064582,9.6748288],[-10.4065407,9.6747576],[-10.4066025,9.6745595],[-10.4067056,9.6744732],[-10.4068705,9.6745138],[-10.4069735,9.6748491],[-10.4069065,9.6755906],[-10.4069065,9.6757989],[-10.4068808,9.6759665],[-10.4067468,9.676124],[-10.4064582,9.6762916],[-10.4059997,9.676449],[-10.405402,9.6769925],[-10.4050825,9.6775259],[-10.4049434,9.6780795],[-10.4048712,9.6781963],[-10.4047373,9.6783284],[-10.4045827,9.6784198],[-10.4043251,9.678435],[-10.4041035,9.6783893],[-10.4039438,9.678237],[-10.4037016,9.678242],[-10.40348,9.6785468],[-10.4034646,9.6787754],[-10.4033564,9.6790649],[-10.4021146,9.6795728],[-10.4020631,9.6798572],[-10.4021043,9.6803956],[-10.4021919,9.6806953],[-10.4023774,9.6810661],[-10.4029957,9.681442],[-10.4043921,9.6819397],[-10.4046188,9.6819854],[-10.4050877,9.6825645],[-10.4052989,9.6826914],[-10.405639,9.682666],[-10.4067107,9.6824984],[-10.4072672,9.6826457],[-10.4076176,9.6828083],[-10.4079399,9.6828085],[-10.4082617,9.6828083],[-10.408983,9.6828133],[-10.4100393,9.6829962],[-10.4106525,9.6829505],[-10.4123219,9.6823461],[-10.4127908,9.6836971],[-10.4133833,9.6850533],[-10.4134555,9.6855307],[-10.4134812,9.6858405],[-10.4133988,9.6861148],[-10.413306,9.6862926],[-10.413033,9.6864297],[-10.4118994,9.6868411],[-10.4117139,9.6868056],[-10.4114975,9.6866837],[-10.4113068,9.6865465],[-10.4111007,9.6864805],[-10.4108483,9.6865059],[-10.4106473,9.6865872],[-10.4105494,9.6867243],[-10.4105546,9.6868259],[-10.4106164,9.6869884],[-10.4106885,9.6871814],[-10.410704,9.6873998],[-10.4106267,9.6876233],[-10.4104464,9.6877909],[-10.4102351,9.6878468],[-10.4100805,9.6879026],[-10.409962,9.687862],[-10.4098899,9.6877858],[-10.4097456,9.6876589],[-10.4096271,9.6875928],[-10.4093798,9.6875979],[-10.4092819,9.6876944],[-10.4092303,9.6878468],[-10.4092458,9.6880957],[-10.4092973,9.6883395],[-10.409421,9.6885985],[-10.4095653,9.6887255],[-10.4097662,9.6888321],[-10.4100187,9.6888372],[-10.4102402,9.6888169],[-10.4106525,9.6889794],[-10.4107297,9.6891216],[-10.4107967,9.6893248],[-10.410771,9.6894873],[-10.4106937,9.6896295],[-10.4102145,9.6900359],[-10.4102248,9.6904066],[-10.4103072,9.6909298],[-10.4103794,9.691326],[-10.4104567,9.6915596],[-10.4105443,9.6917018],[-10.410704,9.6917374],[-10.4110028,9.6916916],[-10.4113171,9.6915545],[-10.4115748,9.6913006],[-10.4118942,9.6910466],[-10.4122395,9.6909806],[-10.412461,9.6911228],[-10.412595,9.6914834],[-10.4124404,9.6920777],[-10.4122549,9.6921843],[-10.4121416,9.692423],[-10.412023,9.6929259],[-10.4119561,9.6931392],[-10.4119045,9.6933677],[-10.4119767,9.6935049],[-10.4121364,9.6935607],[-10.4123374,9.6936674],[-10.412595,9.6937436],[-10.4127496,9.693708],[-10.4128062,9.6936115],[-10.4128629,9.6934693],[-10.413069,9.6933576],[-10.4133524,9.6933525],[-10.4135173,9.6934846],[-10.4137595,9.6937436],[-10.4139759,9.6940483],[-10.4141356,9.6941855],[-10.4143623,9.6941753],[-10.4145427,9.6941042],[-10.414723,9.6939213],[-10.4148467,9.6937741],[-10.4150631,9.6936318],[-10.4152795,9.6936522],[-10.4153619,9.6937639],[-10.4153671,9.6939112],[-10.4152589,9.694094],[-10.4151352,9.6942312],[-10.4149188,9.6945105],[-10.414857,9.6947391],[-10.4147591,9.6949524],[-10.4146354,9.695054],[-10.4143623,9.6951657],[-10.4133679,9.6952013],[-10.4131463,9.6952724],[-10.4129608,9.6955212],[-10.4128887,9.6959733],[-10.4128681,9.6962018],[-10.4127444,9.6962882],[-10.4125125,9.6963288],[-10.4123064,9.6963542],[-10.4121209,9.6962526],[-10.4118221,9.6961104],[-10.4115645,9.6959326],[-10.4112811,9.6953943],[-10.4111213,9.6952267],[-10.4109307,9.6953232],[-10.4106009,9.6955669],[-10.4102502,9.6959883],[-10.4102042,9.6963085],[-10.4103175,9.6965523],[-10.4103794,9.6966285],[-10.4103485,9.6967808],[-10.4102454,9.696923],[-10.410096,9.6970449],[-10.4099723,9.6971567],[-10.4099156,9.6972633],[-10.4099002,9.6974259],[-10.4099105,9.6975731],[-10.4100496,9.6977357],[-10.4101939,9.6977966],[-10.4104567,9.6978779],[-10.4106628,9.6979439],[-10.410807,9.6980506],[-10.4108792,9.6981623],[-10.4108998,9.6984112],[-10.4108998,9.6986753],[-10.410941,9.6988429],[-10.4110698,9.6989445],[-10.4112192,9.6990003],[-10.4113996,9.6989953],[-10.4115129,9.698914],[-10.4116624,9.6989292],[-10.4118272,9.6990308],[-10.4120127,9.6995996],[-10.4120179,9.700006],[-10.4118685,9.7005088],[-10.4110904,9.7016769],[-10.4107504,9.7019715],[-10.4099002,9.7022254],[-10.4098332,9.7024438],[-10.4098796,9.7028146],[-10.4100548,9.7033885],[-10.4102196,9.7036831],[-10.4103948,9.7037491],[-10.4109874,9.7036475],[-10.4112965,9.703739],[-10.4116005,9.7043027],[-10.4119148,9.7051864],[-10.4118736,9.7054455],[-10.4117654,9.7056486],[-10.411379,9.7059787],[-10.4109719,9.7062682],[-10.4107246,9.706385],[-10.4105752,9.706512],[-10.4104618,9.7066542],[-10.4104257,9.7069336],[-10.41057,9.7072992],[-10.4105443,9.7074618],[-10.4103278,9.7075176],[-10.4101527,9.7074313],[-10.4100599,9.7074364],[-10.409792,9.7076395],[-10.4095343,9.7079239],[-10.4093952,9.7082794],[-10.4093849,9.7085029],[-10.4094416,9.708828],[-10.409488,9.7090362],[-10.4095498,9.7092444],[-10.4094674,9.7093765],[-10.4093488,9.7094628],[-10.4091737,9.7094526],[-10.4090397,9.7094577],[-10.4088954,9.7093003],[-10.4087821,9.7089702],[-10.4086842,9.7087518],[-10.4084832,9.7086197],[-10.4083132,9.7087111],[-10.4081586,9.7089651],[-10.4081328,9.7092139],[-10.4084008,9.7094831],[-10.4088645,9.709732],[-10.4094674,9.7104227],[-10.4098126,9.7111794],[-10.4099929,9.711799],[-10.4099775,9.7122155],[-10.4099053,9.7124034],[-10.4098693,9.7126218],[-10.4098693,9.7127691],[-10.4099517,9.7128249],[-10.4101011,9.7128097],[-10.4102093,9.7127335],[-10.4102609,9.7125253],[-10.4103588,9.7123171],[-10.4104618,9.7122155],[-10.4106164,9.7121393],[-10.4108483,9.7121292],[-10.4112553,9.7121647],[-10.4114717,9.7120784],[-10.4118272,9.711926],[-10.4119921,9.7119971],[-10.4121209,9.7121393],[-10.4122085,9.7124339],[-10.4121828,9.7126726],[-10.4120797,9.7128808],[-10.4117345,9.7131144],[-10.4116314,9.7132871],[-10.4115439,9.7134496],[-10.4115439,9.713602],[-10.4115748,9.7137696],[-10.4116933,9.7139372],[-10.4118633,9.7140286],[-10.4121158,9.7140997],[-10.4123064,9.7143028],[-10.4122858,9.7145162],[-10.4120076,9.7147955],[-10.4118891,9.7149986],[-10.4116469,9.7154202],[-10.4114923,9.7155268],[-10.4112553,9.7155624],[-10.4109616,9.7155268],[-10.4107349,9.7154049],[-10.41057,9.7151612],[-10.4104567,9.7148717],[-10.4101836,9.7145619],[-10.4099311,9.714506],[-10.4097353,9.7146177],[-10.4096322,9.7148666],[-10.4096683,9.7151053],[-10.4098074,9.7153135],[-10.410029,9.7156639],[-10.4099981,9.7159026],[-10.4098435,9.7162175],[-10.4095962,9.7166644],[-10.4097349,9.7171149],[-10.4100187,9.7174059],[-10.4104051,9.7175126],[-10.4109358,9.7175227],[-10.4115439,9.7178224],[-10.4116263,9.7181119],[-10.4116366,9.7185232],[-10.4115078,9.7190413],[-10.4114956,9.7194453],[-10.4115439,9.7197523],[-10.4120694,9.7207578],[-10.4127186,9.7216618],[-10.4134297,9.7224338],[-10.4134864,9.7240995],[-10.4133885,9.7249477],[-10.4132184,9.7255622],[-10.4129557,9.7257755],[-10.4124971,9.7260396],[-10.4121931,9.726131],[-10.4117293,9.7259938],[-10.4111471,9.7259532],[-10.4106473,9.7260751],[-10.4094828,9.7265525],[-10.4092406,9.7267404],[-10.4091015,9.7269232],[-10.4091737,9.7272432],[-10.4100702,9.729107],[-10.4110544,9.7305442],[-10.4110698,9.7308337],[-10.4109152,9.7312196],[-10.4108431,9.7315294],[-10.410874,9.7317681],[-10.4110183,9.7318544],[-10.4112656,9.732088],[-10.4119818,9.733251],[-10.412023,9.7335913],[-10.4119561,9.7337893],[-10.4117603,9.7339214],[-10.4106937,9.7341448],[-10.4087408,9.7346933],[-10.4074682,9.7352163],[-10.4065458,9.7353585],[-10.4057111,9.7354601],[-10.405067,9.7357699],[-10.4047167,9.7361457],[-10.4046858,9.7365469],[-10.4047836,9.7369024],[-10.404897,9.7371563],[-10.4049949,9.7375219],[-10.4047888,9.7378317],[-10.4044796,9.7379739],[-10.4041293,9.7381212],[-10.4038459,9.7382938],[-10.4038613,9.738695],[-10.4039695,9.7389642],[-10.4042684,9.7396142],[-10.4046394,9.7399291],[-10.4043354,9.7413307],[-10.4052578,9.7436405],[-10.4049588,9.7442761],[-10.404155,9.7450175],[-10.4031606,9.7458351],[-10.4024547,9.7469168],[-10.4026453,9.7481609],[-10.4024238,9.748943],[-10.402027,9.7497149],[-10.4013844,9.7502839],[-10.4025917,9.7505318],[-10.4015221,9.7519116],[-10.401146,9.7524245],[-10.4008935,9.7530186],[-10.4007904,9.7536229],[-10.4009914,9.7545116],[-10.4012799,9.7557201],[-10.4014654,9.7564057],[-10.4012542,9.7568678],[-10.3999248,9.7574873],[-10.3992601,9.7581881],[-10.3985439,9.7591682],[-10.3982966,9.7594017],[-10.3978792,9.7594779],[-10.3976628,9.7592392],[-10.3972248,9.7578631],[-10.3978122,9.7564869],[-10.3980956,9.7554815],[-10.3984666,9.7549026],[-10.3988273,9.7543338],[-10.3987242,9.7536026],[-10.3984151,9.752912],[-10.3981626,9.7529323],[-10.3976216,9.7531354],[-10.3974516,9.7533233],[-10.3973124,9.7537041],[-10.3974155,9.7545928],[-10.3972918,9.7548823],[-10.3970754,9.7549737],[-10.3966684,9.7549077],[-10.396385,9.7550651],[-10.3962716,9.7552276],[-10.3960088,9.7553545],[-10.3953493,9.7556998],[-10.3951226,9.7557811],[-10.3927163,9.7556795],[-10.3920156,9.7552682],[-10.3909541,9.7543186],[-10.3906553,9.7540952],[-10.3903461,9.7540393],[-10.3900782,9.75441],[-10.3893568,9.7563295],[-10.3894238,9.758051],[-10.3891713,9.758767],[-10.3890599,9.760001],[-10.3889652,9.7603209],[-10.3887179,9.7604326],[-10.3883572,9.7603767],[-10.3876204,9.7604377],[-10.3870948,9.7606916],[-10.3867857,9.760783],[-10.3861365,9.7607373],[-10.3855542,9.7606408],[-10.3851472,9.7604072],[-10.3850802,9.7602853],[-10.3852347,9.7596912],[-10.3851265,9.7589244],[-10.3848019,9.7583049],[-10.384467,9.7579342],[-10.3837044,9.757919],[-10.3831067,9.7575127],[-10.3825706,9.7568281],[-10.3819628,9.7553698],[-10.381427,9.7547756],[-10.3807417,9.7547452],[-10.3797885,9.7549381],[-10.3796596,9.7553545],[-10.379639,9.7560604],[-10.3795051,9.7566139],[-10.3792268,9.7574111],[-10.3793711,9.7582795],[-10.3796184,9.7591885],[-10.3798091,9.7593256],[-10.3800564,9.7594322],[-10.3804274,9.7598283],[-10.3804892,9.7601076],[-10.3804076,9.7604967],[-10.38001,9.7611537],[-10.3795051,9.7615345],[-10.3792835,9.7618697],[-10.3792835,9.7628751],[-10.3785415,9.7648606],[-10.3785518,9.7657898],[-10.3787978,9.766892],[-10.378964,9.7674249],[-10.3792114,9.7677905],[-10.3795411,9.7679632],[-10.3798039,9.7682679],[-10.3798451,9.7693241],[-10.3797266,9.7697201],[-10.3785272,9.7706846],[-10.3774852,9.7715228],[-10.377408,9.7719036],[-10.3774183,9.7726805],[-10.3769854,9.7731223],[-10.3762435,9.773427],[-10.3759305,9.7738324],[-10.3754757,9.7748437],[-10.375249,9.7756409],[-10.3753212,9.7762401],[-10.375528,9.7769556],[-10.3754448,9.7779767],[-10.3751357,9.7783778],[-10.3749244,9.7790024],[-10.3748007,9.779957],[-10.3745277,9.7804698],[-10.3743061,9.7805307],[-10.3739609,9.7804444],[-10.3737342,9.7802667],[-10.3735744,9.7800027],[-10.3735229,9.7798199],[-10.3732601,9.7798351],[-10.3729973,9.7799976],[-10.3728582,9.7802921],[-10.3727912,9.7820287],[-10.3725697,9.78277],[-10.3722502,9.7830899],[-10.3714876,9.7830747],[-10.3702458,9.7826481],[-10.3697203,9.782836],[-10.3692772,9.7832676],[-10.3682003,9.7831915],[-10.3672419,9.7830848],[-10.3646965,9.7819728],[-10.3639803,9.7818408],[-10.3630734,9.781988],[-10.3625788,9.782181],[-10.3622696,9.7824146],[-10.3624087,9.7828614],[-10.3628364,9.7838008],[-10.3636093,9.7847757],[-10.3642276,9.7859537],[-10.3647274,9.7866798],[-10.3652942,9.7872993],[-10.3655827,9.7881472],[-10.3652375,9.7892186],[-10.3655312,9.7898381],[-10.3660001,9.7904423],[-10.3663556,9.7904575],[-10.3666493,9.7901681],[-10.3670667,9.7896908],[-10.3678344,9.7894826],[-10.369509,9.7895385],[-10.3698439,9.7899548],[-10.3699006,9.7911531],[-10.3701958,9.7926205],[-10.3705138,9.7929963],[-10.3712019,9.793364],[-10.3713227,9.7938595],[-10.3712815,9.7947683],[-10.3715701,9.795073],[-10.372276,9.7953726],[-10.37258,9.7966775],[-10.3726779,9.7977894],[-10.372884,9.7983276],[-10.3733147,9.7988168],[-10.3746771,9.7996833],[-10.3772585,9.8023489],[-10.3772946,9.8027704],[-10.3760271,9.8044103],[-10.3747441,9.8047251],[-10.3744916,9.8048419],[-10.3743422,9.8056797],[-10.37427,9.8064159],[-10.3742391,9.8069236],[-10.3740794,9.8074009],[-10.3738269,9.8077411],[-10.3733683,9.8083656],[-10.3723584,9.8103609],[-10.3720544,9.8113713],[-10.3719256,9.812143],[-10.3732387,9.8134666],[-10.373342,9.8139755],[-10.3729633,9.8152306],[-10.3717928,9.8173677],[-10.3699681,9.8203529],[-10.3697616,9.8214045],[-10.3710944,9.822396],[-10.3714485,9.8226596],[-10.3720682,9.8252377],[-10.3727567,9.8278496],[-10.372619,9.8304616],[-10.3725846,9.8324969],[-10.3717871,9.8341994],[-10.3715518,9.8347017],[-10.3719993,9.836703],[-10.3704845,9.838433],[-10.3698993,9.84057],[-10.3694862,9.8440976],[-10.3680841,9.8480498],[-10.3679633,9.8493147],[-10.3685047,9.850592],[-10.3687432,9.8519776],[-10.3687332,9.8525224],[-10.3684973,9.8529839],[-10.3682954,9.8530555],[-10.3677944,9.8528369],[-10.3671786,9.8527225],[-10.3665087,9.8527783],[-10.365108,9.8534021],[-10.364415,9.8538395],[-10.3627912,9.8551402],[-10.3623226,9.8560735],[-10.3622315,9.8566725],[-10.3622897,9.857321],[-10.3626535,9.8588437],[-10.3626972,9.8601465],[-10.3626018,9.8608422],[-10.362439,9.8611894],[-10.3622399,9.8613191],[-10.361909,9.8614044],[-10.3608769,9.8612987],[-10.3602829,9.8611183],[-10.360005,9.8607823],[-10.3601817,9.860142],[-10.3604312,9.8595094],[-10.3604006,9.8587639],[-10.3602773,9.8584211],[-10.3596059,9.8585275],[-10.3591662,9.8583891],[-10.3587419,9.8578218],[-10.3577162,9.8576417],[-10.3568393,9.8576187],[-10.3558571,9.8573592],[-10.3550891,9.8572884],[-10.3548107,9.8573792],[-10.3542507,9.8581215],[-10.3537118,9.8585399],[-10.3528436,9.8589528],[-10.3521734,9.8590379],[-10.3513806,9.8590751],[-10.350471,9.8588987],[-10.3493635,9.859237],[-10.3492644,9.8594475],[-10.3493464,9.8596539],[-10.3498876,9.8597515],[-10.3509385,9.8603886],[-10.3514479,9.8609406],[-10.3515212,9.8614386],[-10.3513206,9.8617374],[-10.3513239,9.8619862],[-10.3515327,9.8622931],[-10.352112,9.8625735],[-10.3523036,9.8627585],[-10.3520824,9.8636823],[-10.3519123,9.8653398],[-10.3511945,9.8664827],[-10.3509305,9.8666402],[-10.3505991,9.8667396],[-10.3502649,9.8666893],[-10.3491749,9.8652942],[-10.34862,9.8647707],[-10.3482517,9.8645704],[-10.3471006,9.8642538],[-10.3462656,9.8640787],[-10.3457549,9.8641153],[-10.3452644,9.8640224],[-10.3449995,9.8637951],[-10.3445394,9.8637153],[-10.3442068,9.8640609],[-10.3439925,9.8643651],[-10.3431842,9.865927],[-10.34317,9.8662246],[-10.3433826,9.8675907],[-10.343693,9.8680952],[-10.3443166,9.8686796],[-10.3451749,9.8699653],[-10.3464055,9.8712811],[-10.3466839,9.8721001],[-10.3471298,9.8726265],[-10.3472438,9.8732109],[-10.3470192,9.8737541],[-10.3465245,9.8741111],[-10.346583,9.8746655],[-10.3474105,9.8751688],[-10.3475165,9.8755825],[-10.3473209,9.8762082],[-10.346608,9.876574],[-10.345453,9.8764138],[-10.3451634,9.8767729],[-10.3452201,9.8772204],[-10.3458505,9.877932],[-10.3458688,9.8782431],[-10.3454182,9.8784041],[-10.3448865,9.8779372],[-10.3443966,9.877233],[-10.3440624,9.8758599],[-10.3437282,9.8751467],[-10.3428131,9.8745734],[-10.3424759,9.8747876],[-10.34205,9.8753758],[-10.3410428,9.8764328],[-10.3407594,9.8769525],[-10.3405189,9.877239],[-10.3390145,9.8783928],[-10.3385658,9.8791148],[-10.3380964,9.879534],[-10.336827,9.8792846],[-10.3356495,9.8796578],[-10.3350966,9.880352],[-10.3350021,9.8807825],[-10.3350912,9.8812182],[-10.3353126,9.8816959],[-10.3353683,9.8819865],[-10.3351808,9.882192],[-10.3348492,9.8822729],[-10.3344451,9.8822752],[-10.334143,9.8820684],[-10.3339274,9.8816168],[-10.3337868,9.8806622],[-10.3336354,9.8803249],[-10.3332678,9.8800546],[-10.3328467,9.8794537],[-10.3325445,9.8792785],[-10.3323181,9.8793539],[-10.3320967,9.8795427],[-10.3318834,9.8805823],[-10.3313675,9.882239],[-10.330988,9.8833219],[-10.3303113,9.8845379],[-10.330248,9.8850158],[-10.3304468,9.8859631],[-10.3306619,9.886489],[-10.3307254,9.8866043],[-10.3311591,9.8873909],[-10.3313507,9.8882383],[-10.3311136,9.8891186],[-10.3310675,9.8895221],[-10.3312755,9.8897691],[-10.3315727,9.8898957],[-10.3320104,9.8897998],[-10.333237,9.8904009],[-10.3349556,9.8904781],[-10.335273,9.8905985],[-10.335453,9.8907819],[-10.3354742,9.8916342],[-10.335731,9.8923766],[-10.3360938,9.8946907],[-10.3362631,9.894968],[-10.3367644,9.8959026],[-10.3371106,9.8967398],[-10.3369412,9.8972336],[-10.3363293,9.8977218],[-10.3358065,9.8980996],[-10.3355061,9.8987201],[-10.3352008,9.8991102],[-10.3348089,9.8994738],[-10.3340162,9.8997386],[-10.3334123,9.9004418],[-10.3332177,9.9008477],[-10.3331105,9.9016355],[-10.3329102,9.9020451],[-10.3327588,9.9023548],[-10.3327622,9.9028349],[-10.3331296,9.9032832],[-10.3336094,9.9035721],[-10.3346025,9.9036377],[-10.3352045,9.9037654],[-10.3357882,9.9040739],[-10.3361553,9.904496],[-10.3364587,9.9051855],[-10.3364609,9.9056005],[-10.3370072,9.9060038],[-10.3374232,9.9061148],[-10.3381382,9.9060801],[-10.3385475,9.9057599],[-10.3388803,9.9058116],[-10.3394515,9.9062177],[-10.3399102,9.9067877],[-10.3403443,9.9068544],[-10.3412143,9.9062702],[-10.3416418,9.9062708],[-10.3417506,9.906644],[-10.3417939,9.9071874],[-10.341379,9.9083578],[-10.3411259,9.9086381],[-10.340086,9.9092003],[-10.3385516,9.9095057],[-10.3376316,9.9097533],[-10.3369873,9.9098499],[-10.3350789,9.9096387],[-10.3337926,9.9097512],[-10.3333425,9.9099302],[-10.3330087,9.9103501],[-10.3332286,9.9113871],[-10.3340104,9.9119856],[-10.3344951,9.9125273],[-10.3353188,9.9132136],[-10.3359781,9.913763],[-10.336374,9.9144489],[-10.3367021,9.9151527],[-10.3372008,9.9165608],[-10.3376006,9.9171984],[-10.3378966,9.9182256],[-10.3383766,9.9192146],[-10.3385831,9.9204998],[-10.3384299,9.9211738],[-10.3382404,9.9215123],[-10.3376146,9.9219016],[-10.3366695,9.922003],[-10.336281,9.922197],[-10.3361431,9.9224019],[-10.3362892,9.9239959],[-10.3364577,9.9244784],[-10.3370015,9.9254345],[-10.3377737,9.9259571],[-10.3389774,9.9259305],[-10.3392878,9.9261638],[-10.3393644,9.9265566],[-10.3391669,9.9269967],[-10.3392845,9.9276023],[-10.3395132,9.9279907],[-10.3401869,9.928565],[-10.3402846,9.9288722],[-10.3401564,9.9293273],[-10.3399905,9.9295217],[-10.3394919,9.9297027],[-10.3391961,9.9301889],[-10.3391954,9.9310765],[-10.339253,9.9318092],[-10.3390156,9.9324767],[-10.3385354,9.9328741],[-10.3383572,9.9333411],[-10.3382719,9.9339016],[-10.3381864,9.9345708],[-10.3382717,9.9348858],[-10.3387302,9.9358257],[-10.3394481,9.9361768],[-10.3400222,9.936116],[-10.340541,9.9361803],[-10.3409402,9.9363622],[-10.3410823,9.9366109],[-10.3408867,9.9369],[-10.3409249,9.937282],[-10.340775,9.9382409],[-10.3400362,9.9395673],[-10.3399346,9.9401419],[-10.3400539,9.9407436],[-10.3404699,9.9416908],[-10.3410882,9.9436731],[-10.3416867,9.9445264],[-10.3425187,9.9468077],[-10.3426493,9.9476543],[-10.3425909,9.9484277],[-10.3423908,9.949035],[-10.3425054,9.9496576],[-10.3430744,9.950568],[-10.3434927,9.9507564],[-10.3437178,9.9510378],[-10.3435785,9.9516868],[-10.3431671,9.9521477],[-10.3426473,9.952334],[-10.3421847,9.9528295],[-10.3420009,9.9532895],[-10.3420647,9.9538554],[-10.3419449,9.9541895],[-10.3417442,9.9545102],[-10.3414778,9.9547266],[-10.3410436,9.9547933],[-10.3405419,9.9546715],[-10.3402943,9.9548575],[-10.3402583,9.9553448],[-10.340571,9.9566189],[-10.3412101,9.9570178],[-10.3424266,9.9577819],[-10.3429148,9.9581785],[-10.3432881,9.9588077],[-10.3434366,9.9595078],[-10.343576,9.9609083],[-10.3437379,9.9613968],[-10.3441426,9.9618512],[-10.3444263,9.9624034],[-10.3449618,9.96354],[-10.3451889,9.9638014],[-10.3469884,9.9646017],[-10.3473943,9.9649636],[-10.3474599,9.9653333],[-10.3478968,9.9659045],[-10.3481649,9.9664333],[-10.348521,9.9688211],[-10.3488444,9.9701743],[-10.3491558,9.9708555],[-10.3494349,9.9717],[-10.3495068,9.9729743],[-10.3493297,9.9733231],[-10.3488599,9.9739459],[-10.3488838,9.9742141],[-10.3490409,9.9743443],[-10.349243,9.9747981],[-10.3494688,9.9750954],[-10.3499169,9.975208],[-10.3507929,9.9757281],[-10.3510193,9.9760571],[-10.3508355,9.9762885],[-10.3505283,9.9763857],[-10.3499993,9.9760145],[-10.3493441,9.9759022],[-10.3486699,9.975913],[-10.3484319,9.9760554],[-10.347467,9.977195],[-10.3472558,9.9776992],[-10.3471179,9.9783057],[-10.3474994,9.9789882],[-10.347733,9.9799889],[-10.3479776,9.980222],[-10.3495415,9.9807426],[-10.3498174,9.9809524],[-10.350111,9.9817405],[-10.3504607,9.9823939],[-10.3503468,9.9827961],[-10.3497323,9.9836631],[-10.3497625,9.9837203],[-10.3501366,9.9844282],[-10.3507018,9.9845855],[-10.3509409,9.9847671],[-10.351426,9.9849782],[-10.3521963,9.9850406],[-10.3523127,9.985324],[-10.3522766,9.9857939],[-10.3515965,9.9869884],[-10.3515907,9.9873949],[-10.3517726,9.9877849],[-10.3520809,9.9879623],[-10.3526487,9.9880156],[-10.3538878,9.988195],[-10.3542686,9.9883425],[-10.3548611,9.9891396],[-10.355385,9.9894444],[-10.3561951,9.9893291],[-10.3565468,9.9893674],[-10.3565973,9.9900594],[-10.3565076,9.9904182],[-10.3561489,9.9907841],[-10.35587,9.9918685],[-10.3556682,9.9923105],[-10.3550976,9.993173],[-10.3547233,9.9938248],[-10.3537787,9.9944645],[-10.3534075,9.994561],[-10.3530679,9.9944435],[-10.3527182,9.9945538],[-10.3521684,9.9949703],[-10.351568,9.9956276],[-10.3512006,9.9961733],[-10.3505896,9.9976183],[-10.3502166,9.9980579],[-10.3495988,9.9983343],[-10.3489334,9.998478],[-10.348482,9.9987461],[-10.3485865,9.9993603],[-10.3491343,10.0006455],[-10.3495153,10.0011175],[-10.3498777,10.0013109],[-10.3502627,10.0014124],[-10.350616,10.0013535],[-10.3507821,10.0010363],[-10.3515239,10.0002851],[-10.3515818,9.9998162],[-10.3518052,9.9989175],[-10.3528203,9.9972911],[-10.353457,9.9969666],[-10.3539389,9.9967789],[-10.3543075,9.9967559],[-10.3546761,9.9968696],[-10.3547463,9.9970894],[-10.3545942,9.9974507],[-10.3545931,9.9978572],[-10.3549503,9.9984846],[-10.3558553,9.9994697],[-10.3569111,10.0002918],[-10.357554,10.0009693],[-10.3578341,10.0014907],[-10.3579917,10.0021012],[-10.3581096,10.0040141],[-10.3579861,10.0045356],[-10.3574935,10.00469],[-10.3569636,10.0042756],[-10.3558819,10.0038276],[-10.3550753,10.0037139],[-10.3537511,10.0038554],[-10.3530318,10.0042858],[-10.3524602,10.0050043],[-10.3517755,10.0061687],[-10.3514917,10.0067896],[-10.3516052,10.0074986],[-10.3520379,10.0089148],[-10.3523592,10.0099903],[-10.3522756,10.0106083],[-10.351889,10.0114578],[-10.3515807,10.0115316],[-10.3510353,10.0114995],[-10.3491879,10.0115199],[-10.3487221,10.0116067],[-10.3482772,10.0115899],[-10.3478745,10.0112465],[-10.3473883,10.0110477],[-10.3466095,10.0110292],[-10.3451938,10.010702],[-10.3446879,10.0107913],[-10.3439979,10.0112655],[-10.3435504,10.011837],[-10.343097,10.0135256],[-10.3425842,10.0157319],[-10.3428914,10.0162219],[-10.3433657,10.0162942],[-10.3437766,10.0161552],[-10.3439714,10.0158143],[-10.3450736,10.0150853],[-10.3455828,10.0148793],[-10.3460502,10.0147601],[-10.3464492,10.0147864],[-10.3470175,10.0153036],[-10.3473971,10.0158299],[-10.3475961,10.0161516],[-10.3476312,10.0165343],[-10.3474023,10.0174098],[-10.3469814,10.0179353],[-10.3461963,10.0185163],[-10.345639,10.0190876],[-10.3450635,10.0196093],[-10.3443462,10.0201321],[-10.3433443,10.0205327],[-10.342687,10.0207125],[-10.3416241,10.0213695],[-10.3409088,10.0220236],[-10.3405439,10.0223],[-10.3395571,10.0224229],[-10.3391304,10.0225042],[-10.3387112,10.0224951],[-10.3382612,10.0222349],[-10.3373003,10.0214481],[-10.3369891,10.0209456],[-10.3366274,10.0208829],[-10.3356653,10.0216191],[-10.335334,10.022023],[-10.3350775,10.022575],[-10.3341487,10.0248052],[-10.3336981,10.02564],[-10.3327835,10.0269808],[-10.3322736,10.0278759],[-10.3316102,10.0284845],[-10.3311252,10.0285737],[-10.3304517,10.0285392],[-10.330132,10.0285228],[-10.3285762,10.0286092],[-10.3274426,10.0284466],[-10.3271653,10.0286009],[-10.3271478,10.0288865],[-10.3280928,10.03053],[-10.328736,10.032052],[-10.3290589,10.0324407],[-10.3293029,10.0329137],[-10.3292885,10.0333342],[-10.3282772,10.0347051],[-10.3271543,10.0350504],[-10.3262689,10.0354518],[-10.3258601,10.035752],[-10.3253921,10.0358999],[-10.3250322,10.0359255],[-10.324428,10.0357935],[-10.3238855,10.0357493],[-10.3232913,10.0358665],[-10.3224882,10.0363516],[-10.3222116,10.0371091],[-10.3222625,10.0374973],[-10.3228767,10.0385974],[-10.3232813,10.0389252],[-10.3237343,10.0390799],[-10.3244451,10.038939],[-10.3248452,10.0390046],[-10.3251085,10.0392284],[-10.3256168,10.0399497],[-10.3257913,10.0404034],[-10.3256351,10.041261],[-10.3253973,10.0415184],[-10.325202,10.0418521],[-10.3251414,10.0422523],[-10.3252128,10.0427594],[-10.3255016,10.0433689],[-10.3256934,10.0438478],[-10.325625,10.0442312],[-10.3253668,10.0446793],[-10.3249334,10.045019],[-10.3244107,10.0451866],[-10.3240741,10.0451845],[-10.3237652,10.0450369],[-10.3232505,10.0450613],[-10.3230119,10.045339],[-10.3229289,10.0458593],[-10.3229395,10.0464267],[-10.3231364,10.0471012],[-10.3234752,10.0475357],[-10.3234996,10.0479014],[-10.3232343,10.0482732],[-10.3228417,10.0485072],[-10.3221268,10.0486877],[-10.3215213,10.0487034],[-10.3204375,10.0485813],[-10.3199985,10.0482892],[-10.3196405,10.0477141],[-10.3193031,10.0474881],[-10.3189117,10.0474948],[-10.3186708,10.0477278],[-10.3183559,10.048417],[-10.3181807,10.0493087],[-10.3181596,10.0500529],[-10.3177169,10.0507756],[-10.31766,10.0513278],[-10.3182804,10.0515977],[-10.3188256,10.0517203],[-10.3191269,10.0522552],[-10.319397,10.0530301],[-10.3199229,10.0544799],[-10.3202369,10.0557955],[-10.3206113,10.0566442],[-10.3210429,10.0570453],[-10.3212699,10.0575256],[-10.3218575,10.0584836],[-10.3220938,10.059069],[-10.3221441,10.0599334],[-10.3222943,10.061309],[-10.321659,10.0621184],[-10.3219708,10.0629691],[-10.3222653,10.0631641],[-10.3228179,10.0632756],[-10.323309,10.0635169],[-10.3235988,10.0639918],[-10.3236983,10.0644264],[-10.3237102,10.0650643],[-10.3233997,10.0656891],[-10.3234807,10.0659549],[-10.3242907,10.0667525],[-10.3256947,10.0674835],[-10.3264777,10.0681614],[-10.3266127,10.0688792],[-10.3264507,10.0697432],[-10.3253572,10.0713914],[-10.3238187,10.0717656],[-10.3234669,10.0719584],[-10.3230796,10.0722878],[-10.3228737,10.0728755],[-10.3229938,10.0733362],[-10.3231933,10.0736973],[-10.3235832,10.0739472],[-10.3243918,10.0741652],[-10.3247035,10.0744055],[-10.3249492,10.0749302],[-10.3250303,10.0755582],[-10.3248107,10.0761911],[-10.3250235,10.0765573],[-10.3251908,10.0770016],[-10.3250939,10.0784144],[-10.3249526,10.0788136],[-10.3246854,10.0791461],[-10.3243962,10.0796142],[-10.3239832,10.0801004],[-10.3234249,10.0807614],[-10.3226517,10.0826508],[-10.3217408,10.0827511],[-10.3206122,10.0830759],[-10.3197289,10.0835499],[-10.3191325,10.0839898],[-10.3187477,10.0847099],[-10.318657,10.0856811],[-10.3187503,10.0861504],[-10.3187239,10.086981],[-10.3185897,10.0873398],[-10.3186622,10.0877337],[-10.3188715,10.0881401],[-10.3193311,10.0885297],[-10.3213614,10.090796],[-10.3218527,10.0916303],[-10.3222439,10.0925758],[-10.3225783,10.0937267],[-10.3234789,10.0950568],[-10.3236292,10.0956752],[-10.3235054,10.0960844],[-10.3231556,10.0964746],[-10.3226986,10.0966433],[-10.3221771,10.0966372],[-10.321489,10.096587],[-10.3203676,10.0965823],[-10.3197012,10.0964854],[-10.318704,10.0961457],[-10.3176566,10.0956241],[-10.3173578,10.0953281],[-10.3167745,10.0948712],[-10.3163551,10.0944513],[-10.3162306,10.0940265],[-10.3163621,10.0930979],[-10.3165617,10.0923343],[-10.3168348,10.0918049],[-10.3171851,10.0908645],[-10.3172318,10.0903084],[-10.3170041,10.0898002],[-10.3162164,10.0896844],[-10.3155123,10.0898049],[-10.3151986,10.0899255],[-10.3141453,10.0904018],[-10.3135618,10.0907952],[-10.3124593,10.0916083],[-10.3112804,10.092236],[-10.310777,10.0923645],[-10.3099959,10.092416],[-10.3088371,10.0923696],[-10.3083268,10.092196],[-10.306032,10.0909664],[-10.3050022,10.0901751],[-10.3045749,10.08965],[-10.30375,10.0889339],[-10.3029921,10.0885193],[-10.3023497,10.0884677],[-10.3016646,10.0886893],[-10.3010005,10.089034],[-10.3005337,10.0892131],[-10.2998764,10.0897529],[-10.299646,10.0900913],[-10.2993712,10.0911469],[-10.2992743,10.0922311],[-10.2993388,10.0930412],[-10.2995723,10.0942102],[-10.2992915,10.0944956],[-10.2981891,10.094772],[-10.2970344,10.0948666],[-10.2965039,10.094699],[-10.2955465,10.09462],[-10.2947973,10.0948523],[-10.2944432,10.0951469],[-10.294256,10.095657],[-10.2940296,10.0962656],[-10.2937162,10.0967156],[-10.2932199,10.0969985],[-10.2930414,10.0972471],[-10.2929848,10.0975085],[-10.2931198,10.0985072],[-10.2933418,10.0994972],[-10.2933766,10.1003887],[-10.2931589,10.1009073],[-10.2929805,10.1012802],[-10.2924972,10.1018717],[-10.2920575,10.1024674],[-10.2919922,10.1031703],[-10.2919226,10.1036718],[-10.291657,10.1038004],[-10.2910911,10.1041004],[-10.2904642,10.1042032],[-10.2895717,10.1045718],[-10.288701,10.1049276],[-10.2883963,10.1048675],[-10.2879958,10.1044775],[-10.2877824,10.1037146],[-10.2877084,10.1033246],[-10.2874733,10.1025574],[-10.2870336,10.1018502],[-10.2865765,10.1015159],[-10.2859671,10.1015545],[-10.2859105,10.1017217],[-10.2861194,10.1020345],[-10.2863153,10.1025617],[-10.2864546,10.1030546],[-10.286176,10.1034918],[-10.2855796,10.104349],[-10.2844564,10.1054804],[-10.2835552,10.1063805],[-10.2835335,10.1068219],[-10.2835378,10.1075119],[-10.283725,10.1082834],[-10.2840864,10.1092306],[-10.2843867,10.1100663],[-10.2845174,10.1105163],[-10.2843563,10.1111678],[-10.2841342,10.1119907],[-10.2836989,10.1128993],[-10.2834638,10.1136193],[-10.2831591,10.1142536],[-10.2826454,10.1148922],[-10.2820359,10.1155522],[-10.282123,10.1159893],[-10.2822753,10.1164865],[-10.2827281,10.1173308],[-10.2833245,10.1186722],[-10.2839471,10.1200051],[-10.2845914,10.1206651],[-10.2852139,10.1213551],[-10.2855186,10.1218908],[-10.2855448,10.122375],[-10.2849701,10.1226622],[-10.2843693,10.1229965],[-10.2838121,10.1232965],[-10.2832679,10.1233908],[-10.2830067,10.1229279],[-10.2825844,10.1221565],[-10.2818182,10.1210679],[-10.2807081,10.1196622],[-10.2804122,10.1194071],[-10.2799027,10.1189679],[-10.279254,10.1185822],[-10.2784269,10.1186251],[-10.2774082,10.1189508],[-10.2763982,10.1195208],[-10.2756102,10.1199108],[-10.2753136,10.1200076],[-10.2747961,10.1201765],[-10.274265,10.1201165],[-10.2736555,10.1198636],[-10.272528,10.1199536],[-10.2711392,10.1201593],[-10.2702903,10.1203993],[-10.2697722,10.1205193],[-10.2692455,10.1202193],[-10.268784,10.1193665],[-10.2683051,10.1184365],[-10.2676869,10.1174208],[-10.2669512,10.1167822],[-10.2663939,10.1167093],[-10.2661458,10.1168979],[-10.2658672,10.1173908],[-10.2655189,10.1179822],[-10.2651924,10.1184279],[-10.2644741,10.1189808],[-10.2636382,10.1193965],[-10.2625803,10.1198851],[-10.261566,10.1201765],[-10.2599378,10.1204036],[-10.259673,10.120418],[-10.2592282,10.1204422],[-10.258462,10.1204422],[-10.257822,10.1206008],[-10.257526,10.1208965],[-10.2573997,10.1213936],[-10.2577175,10.1216851],[-10.2582356,10.1220451],[-10.2585621,10.122645],[-10.2586709,10.1231722],[-10.2587145,10.1237379],[-10.2587493,10.1246465],[-10.258697,10.1252936],[-10.2587536,10.1259193],[-10.2590105,10.126305],[-10.2595939,10.1268964],[-10.2600727,10.127475],[-10.2604471,10.1281435],[-10.2605516,10.1286449],[-10.2604123,10.1291206],[-10.260064,10.1295578],[-10.2594545,10.1300163],[-10.2589713,10.1301578],[-10.258536,10.1298063],[-10.2582574,10.1293049],[-10.2580005,10.1289964],[-10.2575347,10.1285292],[-10.2568555,10.1283064],[-10.2558847,10.1282678],[-10.2541782,10.1284735],[-10.253068,10.1285764],[-10.2522844,10.1285035],[-10.2514616,10.1283878],[-10.2508434,10.1283792],[-10.250543,10.1285978],[-10.249964,10.1292321],[-10.249298,10.1298192],[-10.2483707,10.1303678],[-10.2478178,10.1307577],[-10.2474477,10.1313106],[-10.2471865,10.1318591],[-10.2470908,10.132232],[-10.2473389,10.1327677],[-10.2478439,10.1333162],[-10.2483533,10.1336676],[-10.2491151,10.1338219],[-10.2500511,10.1339119],[-10.2511656,10.1341433],[-10.2515748,10.1343147],[-10.2519013,10.1346362],[-10.2523236,10.1353261],[-10.2529287,10.1363418],[-10.2534381,10.1371603],[-10.2534555,10.1375803],[-10.2533597,10.1384717],[-10.2534511,10.140083],[-10.2534381,10.140923],[-10.2534903,10.14307],[-10.2533292,10.1435413],[-10.2529374,10.1438585],[-10.2521974,10.1444413],[-10.2520649,10.1446628],[-10.2517054,10.1452641],[-10.2513397,10.1459883],[-10.2507866,10.146602],[-10.2506214,10.1467854],[-10.2496314,10.1481138],[-10.2489932,10.1486924],[-10.2485274,10.1488124],[-10.2477481,10.1489666],[-10.2474976,10.1489845],[-10.2472083,10.1490052],[-10.2468252,10.1487952],[-10.2462592,10.1482595],[-10.2459516,10.1476737],[-10.2452111,10.147082],[-10.2443437,10.146284],[-10.2433599,10.1456026],[-10.2424587,10.1449812],[-10.2421657,10.1448116],[-10.2417665,10.1448503],[-10.2411489,10.1450952],[-10.2408727,10.145265],[-10.2406047,10.1454219],[-10.2405126,10.1456343],[-10.2405693,10.1458255],[-10.241038,10.1464438],[-10.2409833,10.1472422],[-10.2409916,10.1479639],[-10.2409872,10.1487309],[-10.2408697,10.1490823],[-10.2406868,10.1494252],[-10.2401992,10.1497723],[-10.2396768,10.1500979],[-10.2389324,10.1503422],[-10.2381444,10.1505051],[-10.2375567,10.1504836],[-10.2366164,10.1502522],[-10.2358066,10.149978],[-10.23474,10.1497808],[-10.2342394,10.1497208],[-10.233299,10.149948],[-10.2326242,10.1502351],[-10.2316926,10.1507322],[-10.2309917,10.1513278],[-10.2306913,10.1516707],[-10.2302081,10.1519792],[-10.22969,10.1521806],[-10.2291415,10.1522106],[-10.2285842,10.1517906],[-10.228249,10.1513321],[-10.2279356,10.1508479],[-10.2275655,10.1505051],[-10.2271258,10.1503636],[-10.2267906,10.1505522],[-10.2266992,10.1510236],[-10.226586,10.1517606],[-10.2265251,10.1523177],[-10.2264641,10.1530848],[-10.2264467,10.153509],[-10.2263248,10.1541433],[-10.2261463,10.1549789],[-10.2261333,10.1553817],[-10.2266295,10.1561659],[-10.2269648,10.1567658],[-10.2271781,10.1574086],[-10.2274132,10.1585956],[-10.2274175,10.1594741],[-10.2274045,10.1600226],[-10.2275351,10.1606739],[-10.2280183,10.1615095],[-10.228741,10.1621309],[-10.2292155,10.1621909],[-10.2295986,10.1623366],[-10.2299512,10.1624951],[-10.2306783,10.1624994],[-10.2312834,10.162388],[-10.2319016,10.1624694],[-10.2324893,10.1627008],[-10.2328724,10.1630351],[-10.2333121,10.1636178],[-10.2335994,10.1641406],[-10.2336386,10.1649077],[-10.2336691,10.1655718],[-10.233582,10.1661803],[-10.2333121,10.166566],[-10.2331249,10.1669559],[-10.2330552,10.1675344],[-10.2328202,10.1680186],[-10.2324022,10.1680786],[-10.2317536,10.1680701],[-10.231414,10.1680229],[-10.2309438,10.1678815],[-10.2305259,10.1678001],[-10.2299425,10.1678044],[-10.2292939,10.1679244],[-10.228902,10.1679801],[-10.2284885,10.1679501],[-10.2277832,10.1678944],[-10.2271476,10.1679029],[-10.2267123,10.1679415],[-10.2260157,10.1679929],[-10.2255673,10.1680658],[-10.225145,10.1683786],[-10.2244833,10.1692227],[-10.2240218,10.1699083],[-10.2236779,10.170534],[-10.2233993,10.1712067],[-10.2232252,10.1716438],[-10.2231642,10.1721494],[-10.2232077,10.1726422],[-10.2229944,10.1731264],[-10.2225242,10.1734906],[-10.2220454,10.1737477],[-10.2218582,10.1740905],[-10.2216318,10.1743862],[-10.2208351,10.1746433],[-10.2199731,10.1748875],[-10.2192983,10.1750932],[-10.2187237,10.1752603],[-10.2178661,10.1753803],[-10.2170084,10.1753932],[-10.2165295,10.1756031],[-10.2162422,10.1759888],[-10.2156458,10.1773728],[-10.2151408,10.1784226],[-10.2145792,10.1797381],[-10.2143964,10.1801794],[-10.2139175,10.180985],[-10.2136214,10.1817134],[-10.2134865,10.182429],[-10.2133254,10.1828704],[-10.2130686,10.183316],[-10.2126027,10.1836631],[-10.2120803,10.1838259],[-10.2113881,10.183783],[-10.2106263,10.1834274],[-10.209773,10.1830803],[-10.208898,10.1827418],[-10.2080534,10.182459],[-10.2073307,10.1823005],[-10.2068562,10.1822662],[-10.2063686,10.1824804],[-10.2062423,10.1828404],[-10.2063425,10.1831746],[-10.2068518,10.183813],[-10.2073394,10.1846743],[-10.2075919,10.1857541],[-10.2077095,10.1864054],[-10.2081579,10.1871723],[-10.2087108,10.1877636],[-10.2092419,10.1881236],[-10.2100603,10.1884706],[-10.2105523,10.1888263],[-10.2108135,10.1891605],[-10.2108788,10.1898161],[-10.2109049,10.1901717],[-10.2106872,10.1909344],[-10.210352,10.19156],[-10.2099776,10.1923741],[-10.2095902,10.1930168],[-10.2094745,10.193212],[-10.2092549,10.1935824],[-10.2089197,10.1940622],[-10.2084757,10.1945936],[-10.2082018,10.1948558],[-10.2078357,10.1952063],[-10.2073873,10.1955533],[-10.2070173,10.1958404],[-10.2065514,10.196346],[-10.2062685,10.1968216],[-10.2061988,10.1974472],[-10.2063381,10.1981541],[-10.2062119,10.1986212],[-10.2057896,10.1992853],[-10.2052367,10.1996795],[-10.2045837,10.1998123],[-10.2040917,10.199808],[-10.2034213,10.2000222],[-10.2030948,10.2005064],[-10.2028815,10.2009734],[-10.2026508,10.2015347],[-10.2023242,10.2022074],[-10.2019803,10.2029144],[-10.2019676,10.2031302],[-10.2019411,10.2035828],[-10.2020239,10.2042983],[-10.2024766,10.2049967],[-10.2029903,10.2055751],[-10.2033952,10.2059436],[-10.2039829,10.2061749],[-10.2046533,10.2062221],[-10.2050756,10.206282],[-10.205672,10.2065605],[-10.2060726,10.206899],[-10.2061248,10.2074903],[-10.2059681,10.2079916],[-10.2055414,10.2084286],[-10.2048754,10.2092127],[-10.204366,10.2098896],[-10.2042528,10.2104852],[-10.2043225,10.2109779],[-10.2046229,10.2115949],[-10.2051955,10.2121121],[-10.2053107,10.2122161],[-10.2062032,10.2127517],[-10.2067212,10.2129616],[-10.2072301,10.2128031],[-10.2077688,10.2124819],[-10.2080489,10.211973],[-10.2084768,10.2112853],[-10.2093695,10.2101946],[-10.209899,10.2096947],[-10.2105547,10.209416],[-10.2110872,10.2094221],[-10.211669,10.2096735],[-10.2124048,10.21024],[-10.2133006,10.2109581],[-10.2141348,10.2116215],[-10.214615,10.2120548],[-10.2150183,10.2126092],[-10.21544,10.2135272],[-10.2159818,10.2143482],[-10.2165944,10.215151],[-10.2170038,10.216072],[-10.2172193,10.2166779],[-10.2173486,10.2171656],[-10.2173979,10.2179533],[-10.2173117,10.2186562],[-10.2168684,10.2189955],[-10.2163143,10.2193711],[-10.215637,10.2200134],[-10.2150203,10.2210955],[-10.2147424,10.2215558],[-10.2145133,10.2221044],[-10.2142148,10.222533],[-10.2140021,10.2228361],[-10.2138156,10.2231302],[-10.2136749,10.2235171],[-10.2135512,10.2239011],[-10.2135328,10.2240978],[-10.2135488,10.2242747],[-10.2136239,10.2244489],[-10.2137493,10.2245424],[-10.2142579,10.224703],[-10.2150583,10.2244365],[-10.2159818,10.223879],[-10.2164005,10.2236003],[-10.2180628,10.2230308],[-10.2189247,10.2225461],[-10.219762,10.2223279],[-10.220784,10.2230792],[-10.2218799,10.2243637],[-10.2230743,10.2257694],[-10.2239732,10.2270781],[-10.2249583,10.2275265],[-10.2260296,10.2276113],[-10.2269777,10.2275629],[-10.22766,10.2278108],[-10.2277781,10.2278537],[-10.2281351,10.2287019],[-10.2285169,10.2297562],[-10.2285907,10.2312103],[-10.2289971,10.2326886],[-10.229071,10.2334641],[-10.2288863,10.234688],[-10.2284799,10.2353908],[-10.2286646,10.2363239],[-10.2291941,10.23716],[-10.2299083,10.2379718],[-10.2296497,10.2393411],[-10.2293049,10.2403226],[-10.2286893,10.2418494],[-10.2283691,10.2429278],[-10.2281844,10.2438729],[-10.2288616,10.2440789],[-10.230056,10.2441516],[-10.2311027,10.2438366],[-10.2323833,10.2434367],[-10.234218,10.2430126],[-10.2353754,10.2425643],[-10.2362989,10.2423825],[-10.2367176,10.2426733],[-10.2370131,10.2433277],[-10.2369023,10.2443455],[-10.2369516,10.2454118],[-10.237284,10.2469628],[-10.2373579,10.247811],[-10.2372224,10.2485259],[-10.2366191,10.24958],[-10.2363642,10.2499179],[-10.2357325,10.2507554],[-10.234846,10.2522094],[-10.2340825,10.2528758],[-10.232765,10.2539179],[-10.2312135,10.2550568],[-10.2304378,10.2557475],[-10.2301669,10.2562927],[-10.2303023,10.2570803],[-10.2309672,10.2573832],[-10.2317676,10.25788],[-10.2331467,10.2580618],[-10.2344519,10.2578316],[-10.2350676,10.2579285],[-10.235634,10.2582556],[-10.2363974,10.2591159],[-10.2369269,10.2595763],[-10.2378504,10.2592007],[-10.2397713,10.2583162],[-10.2411258,10.2578679],[-10.2417168,10.2579285],[-10.2421109,10.258607],[-10.2421355,10.2592128],[-10.2417907,10.259952],[-10.2415937,10.2605578],[-10.2410519,10.2618785],[-10.2405963,10.2628478],[-10.2398817,10.2640799],[-10.2396732,10.2646837],[-10.2398083,10.2654767],[-10.2397467,10.2660102],[-10.2391926,10.2668704],[-10.2382814,10.268288],[-10.2380228,10.2692452],[-10.2383676,10.2709657],[-10.2382198,10.2714261],[-10.2375426,10.2718138],[-10.2364221,10.2716442],[-10.2345381,10.2710263],[-10.2332575,10.2702872],[-10.2323094,10.2697177],[-10.2312997,10.2694875],[-10.2300807,10.2694269],[-10.2287385,10.2698146],[-10.2283198,10.2703478],[-10.2281721,10.271099],[-10.2281228,10.2719955],[-10.2278643,10.2735343],[-10.2275072,10.2746611],[-10.2270146,10.2756667],[-10.2262758,10.2774962],[-10.2259926,10.2785018],[-10.2262881,10.2796165],[-10.2274702,10.2816519],[-10.2287479,10.282621],[-10.2294367,10.2824084],[-10.2297473,10.2815047],[-10.2291531,10.2802953],[-10.2289775,10.2786606],[-10.2294367,10.277717],[-10.2305713,10.2772386],[-10.2306928,10.2767867],[-10.2304362,10.2760957],[-10.2307468,10.2758033],[-10.2321515,10.2752982],[-10.2332321,10.2749527],[-10.234056,10.2750324],[-10.2347718,10.2757767],[-10.235123,10.277119],[-10.2351365,10.2781689],[-10.2346908,10.2796042],[-10.2345913,10.2805832],[-10.2346721,10.2819645],[-10.2354795,10.2865121],[-10.2352986,10.2872059],[-10.2341483,10.2875301],[-10.2337047,10.2877546],[-10.2331082,10.2883791],[-10.2319715,10.2912525],[-10.2311031,10.2923206],[-10.2304777,10.2933221],[-10.2298602,10.2947353],[-10.2295636,10.2959447],[-10.2296126,10.297254],[-10.2294524,10.2986633],[-10.2293692,10.3007511],[-10.2291004,10.3018556],[-10.2284701,10.302905],[-10.2280909,10.3038709],[-10.2272664,10.3051778],[-10.2269234,10.3058321],[-10.2269902,10.3062524],[-10.2275315,10.306401],[-10.227989,10.3060729],[-10.2284992,10.3053306],[-10.2305799,10.3038255],[-10.2316423,10.3038634],[-10.2321429,10.3041727],[-10.2333132,10.3051566],[-10.234361,10.3065055],[-10.2349826,10.3080521],[-10.2357567,10.3086403],[-10.2363065,10.3097747],[-10.2365013,10.3119616],[-10.2367715,10.3125996],[-10.2378522,10.313211],[-10.2396793,10.3143022],[-10.2419416,10.3145363],[-10.2429979,10.3148871],[-10.243563,10.3152532],[-10.2437827,10.3157761],[-10.2436071,10.3167995],[-10.2431343,10.317464],[-10.2410649,10.3179108],[-10.2409716,10.3183496],[-10.2414456,10.3192316],[-10.2438503,10.3200025],[-10.2450526,10.3213049],[-10.2451927,10.3217298],[-10.2455524,10.3228201],[-10.2454578,10.3243883],[-10.2439178,10.3265148],[-10.2435395,10.327764],[-10.2432288,10.3287076],[-10.2423778,10.3293323],[-10.2410539,10.3313657],[-10.2403519,10.3327666],[-10.2401083,10.3332528],[-10.2384196,10.3340236],[-10.2370147,10.3344356],[-10.2332186,10.3342097],[-10.2313274,10.334635],[-10.2303817,10.3351799],[-10.2284094,10.3368145],[-10.2281461,10.3368433],[-10.2271936,10.3369474],[-10.2259913,10.3365354],[-10.2247215,10.3350071],[-10.2238028,10.3342762],[-10.2214583,10.3344411],[-10.2202741,10.3343689],[-10.2178368,10.3333243],[-10.2162895,10.3329899],[-10.2150824,10.3329356],[-10.2121207,10.3310758],[-10.2095562,10.3287514],[-10.2061465,10.3274318],[-10.2043903,10.3276577],[-10.2025058,10.3273321],[-10.2017493,10.3275846],[-10.2007024,10.3290798],[-10.199419,10.3311464],[-10.1987436,10.331565],[-10.1970955,10.3311862],[-10.1959269,10.331452],[-10.1934781,10.3312892],[-10.1926307,10.3312328],[-10.1906854,10.3313191],[-10.1889563,10.3311065],[-10.187119,10.3310135],[-10.1851467,10.3311862],[-10.1831406,10.3309204],[-10.1822625,10.3304686],[-10.1805942,10.3299303],[-10.1793243,10.3302294],[-10.1774803,10.330947],[-10.1753797,10.3312859],[-10.1736573,10.3314055],[-10.1721308,10.3316647],[-10.1714688,10.3321365],[-10.1714688,10.3330601],[-10.1711649,10.3344622],[-10.1707663,10.3352596],[-10.1699761,10.3356051],[-10.1691655,10.3370139],[-10.1684225,10.3378711],[-10.1675782,10.3390273],[-10.166842,10.3407815],[-10.1660584,10.3416719],[-10.1658355,10.3423364],[-10.1659504,10.3434859],[-10.1664907,10.3442301],[-10.1676728,10.3448215],[-10.1685036,10.3460043],[-10.1690034,10.3470143],[-10.1690102,10.3476854],[-10.1685779,10.3486754],[-10.1684473,10.3491085],[-10.1681591,10.3500642],[-10.1680091,10.3511087],[-10.1681861,10.3528748],[-10.1680382,10.3539491],[-10.1676871,10.3545316],[-10.1665353,10.3550773],[-10.1654138,10.3554087],[-10.1649187,10.3552235],[-10.1626981,10.354629],[-10.1618673,10.3546755],[-10.1609351,10.3549878],[-10.1604488,10.3554728],[-10.1601381,10.3571406],[-10.1594289,10.3576522],[-10.1582603,10.3582901],[-10.1577284,10.3587805],[-10.155194,10.3603943],[-10.1546339,10.3610688],[-10.1545195,10.3617651],[-10.1547491,10.362496],[-10.1552506,10.3630463],[-10.1593287,10.3649943],[-10.1609498,10.3658049],[-10.161651,10.366315],[-10.1617603,10.3677184],[-10.1623142,10.3690473],[-10.1623069,10.3700347],[-10.1620089,10.37141],[-10.1614686,10.3718194],[-10.1608921,10.371739],[-10.160218,10.3710383],[-10.1591932,10.3704184],[-10.158159,10.3703413],[-10.1572078,10.3705356],[-10.1565655,10.3707504],[-10.1554652,10.37192],[-10.1546335,10.3738625],[-10.1546475,10.3753093],[-10.1543048,10.377189],[-10.154044,10.3778541],[-10.1534598,10.3786594],[-10.1526012,10.3796779],[-10.1513043,10.3810465],[-10.1505478,10.3828537],[-10.1503046,10.3839964],[-10.149977,10.3859831],[-10.1494839,10.3875313],[-10.1497811,10.3886143],[-10.1507612,10.3905545],[-10.1507342,10.3922821],[-10.1515718,10.3941027],[-10.1515989,10.3957505],[-10.1507747,10.3969863],[-10.1494237,10.3972122],[-10.1482077,10.3970793],[-10.1466675,10.3960561],[-10.1449787,10.3945545],[-10.1440195,10.394209],[-10.1421415,10.3940096],[-10.1399933,10.3928934],[-10.1387504,10.3914183],[-10.1376425,10.3910728],[-10.1365346,10.3910728],[-10.1355789,10.3917507],[-10.1352234,10.392088],[-10.1345882,10.3947553],[-10.1339812,10.3968401],[-10.133171,10.3985083],[-10.1322518,10.399458],[-10.1305225,10.4002022],[-10.1298563,10.400967],[-10.1293857,10.4017568],[-10.1291424,10.4024302],[-10.1289552,10.4030725],[-10.1282797,10.4039096],[-10.1270773,10.4045342],[-10.1265098,10.4052385],[-10.1257938,10.4068065],[-10.1248788,10.4072698],[-10.1238656,10.4082176],[-10.1238469,10.408492],[-10.1238799,10.4086191],[-10.1240602,10.4088431],[-10.1246319,10.4091851],[-10.1253614,10.4101817],[-10.1254425,10.4120287],[-10.1258473,10.4127807],[-10.1264558,10.4134373],[-10.1275637,10.4143143],[-10.1286985,10.4142346],[-10.1293786,10.4137857],[-10.1299176,10.4131724],[-10.1305225,10.4126533],[-10.1318313,10.412348],[-10.1331948,10.412101],[-10.1358456,10.4114042],[-10.1377723,10.4109612],[-10.1403716,10.4099292],[-10.1411694,10.4097456],[-10.1419548,10.4096969],[-10.1421592,10.4099355],[-10.1422821,10.4102056],[-10.1426819,10.4117497],[-10.1422505,10.4127494],[-10.1407499,10.4153906],[-10.1406142,10.4158184],[-10.1405778,10.4162367],[-10.1404932,10.416653],[-10.1405338,10.4183538],[-10.1402396,10.4200837],[-10.1403165,10.420638],[-10.1404849,10.4211895],[-10.1407,10.4215533],[-10.1409861,10.4218246],[-10.1414444,10.4222181],[-10.1418333,10.4226692],[-10.1425738,10.423629],[-10.1429276,10.4240422],[-10.1430859,10.4242665],[-10.1432119,10.4244854],[-10.1435043,10.4249418],[-10.1438707,10.42533],[-10.144423,10.4257345],[-10.1449406,10.4261328],[-10.1459778,10.4269316],[-10.1462026,10.427151],[-10.1463783,10.4273937],[-10.1465419,10.4276602],[-10.1466267,10.4279514],[-10.146727,10.4286467],[-10.1471691,10.4292703],[-10.1479977,10.4297936],[-10.1490724,10.4300468],[-10.1494038,10.4304115],[-10.1496586,10.4308045],[-10.1501709,10.4315484],[-10.1511395,10.4330497],[-10.1520233,10.4352645],[-10.1529476,10.4362973],[-10.154689,10.4373091],[-10.155208,10.4382583],[-10.1555459,10.4398562],[-10.1548249,10.4416845],[-10.1538335,10.4432278],[-10.1522474,10.4447688],[-10.1511456,10.4453569],[-10.150472,10.4462101],[-10.150186,10.4480154],[-10.1503552,10.4489926],[-10.1508589,10.4500426],[-10.1516499,10.4511968],[-10.1519772,10.4528071],[-10.1517745,10.4537903],[-10.1509233,10.4551322],[-10.1501262,10.4549329],[-10.149194,10.45387],[-10.1467756,10.4506547],[-10.1456137,10.4496981],[-10.1445869,10.449326],[-10.1436277,10.4493792],[-10.1425603,10.4496582],[-10.1417497,10.4506945],[-10.138926,10.4523288],[-10.1366157,10.4529266],[-10.1323194,10.4525015],[-10.1313061,10.4521162],[-10.1297929,10.4512924],[-10.1278744,10.4506015],[-10.1257533,10.4491267],[-10.1246724,10.4477051],[-10.124186,10.445845],[-10.1233484,10.4453135],[-10.1224297,10.4452736],[-10.1208354,10.4450743],[-10.1197411,10.4441709],[-10.1187818,10.4439317],[-10.1179712,10.4443702],[-10.1161203,10.4464163],[-10.1145125,10.4484491],[-10.1135803,10.4490736],[-10.1125805,10.4494855],[-10.1120941,10.4501099],[-10.1120536,10.4507875],[-10.1130399,10.4520896],[-10.1132831,10.4529001],[-10.1133236,10.4538833],[-10.1134722,10.4552783],[-10.1130669,10.4566069],[-10.1134182,10.4577761],[-10.1147422,10.4593704],[-10.1156339,10.4600879],[-10.1161608,10.4621073],[-10.1165041,10.4645587],[-10.1155676,10.4682046],[-10.1148032,10.4694825],[-10.1147841,10.4706289],[-10.1155103,10.4710799],[-10.1170392,10.4718692],[-10.1177654,10.4732787],[-10.1176508,10.4744438],[-10.1172112,10.47497],[-10.1156632,10.4754774],[-10.1149943,10.4760036],[-10.114249,10.4777889],[-10.1135419,10.4782587],[-10.1104458,10.4788977],[-10.1091654,10.4790105],[-10.1084009,10.4793675],[-10.1081334,10.4799689],[-10.1082671,10.4802695],[-10.1085538,10.4805514],[-10.1105796,10.4807769],[-10.1114205,10.4813031],[-10.1133316,10.4827689],[-10.1148414,10.484028],[-10.1157588,10.4844226],[-10.1184152,10.4845354],[-10.1198486,10.4848173],[-10.1217024,10.4861515],[-10.122505,10.487016],[-10.1235562,10.4875609],[-10.1248175,10.4875045],[-10.1267477,10.4869972],[-10.1303024,10.4868844],[-10.1329971,10.487373],[-10.1352905,10.4888012],[-10.1358065,10.4895717],[-10.1361314,10.490718],[-10.1370678,10.4922025],[-10.1370869,10.4927475],[-10.1354242,10.4943448],[-10.1347745,10.4944011],[-10.1328442,10.4941568],[-10.1310095,10.4944951],[-10.1290793,10.4953219],[-10.1279517,10.4963555],[-10.127818,10.4971823],[-10.1281811,10.4981031],[-10.1286971,10.4983098],[-10.1301686,10.4988359],[-10.1315285,10.4992667],[-10.1327309,10.4999835],[-10.1334289,10.5005601],[-10.1340673,10.5012412],[-10.1345833,10.502425],[-10.1347745,10.5037592],[-10.1343725,10.5043137],[-10.1342207,10.5049012],[-10.1340968,10.5054945],[-10.1345069,10.5079684],[-10.135214,10.5092085],[-10.1374691,10.5120647],[-10.1380425,10.5131546],[-10.1387496,10.5177394],[-10.1382145,10.5207458],[-10.137281,10.5241342],[-10.1364562,10.5262888],[-10.1358829,10.5285623],[-10.1355608,10.5316208],[-10.1375754,10.5309144],[-10.1381816,10.5303343],[-10.1411441,10.5260962],[-10.1417622,10.5248969],[-10.1420755,10.5232192],[-10.1425866,10.5190859],[-10.1427927,10.514434],[-10.1427597,10.5100088],[-10.142463,10.5085012],[-10.1422899,10.5067912],[-10.1423064,10.505227],[-10.1424712,10.503922],[-10.1428669,10.5028523],[-10.1438313,10.5011988],[-10.1446474,10.4990429],[-10.1453892,10.4970976],[-10.1459086,10.4955415],[-10.1465268,10.4941069],[-10.1472027,10.4931342],[-10.1488843,10.4910187],[-10.1500218,10.4888061],[-10.150739,10.4875254],[-10.1511923,10.4865366],[-10.1517281,10.485491],[-10.1524041,10.4847371],[-10.1532861,10.4840726],[-10.1549293,10.4829907],[-10.1558734,10.4820306],[-10.157075,10.4802054],[-10.1582236,10.4789418],[-10.1589408,10.4777827],[-10.1596497,10.4765912],[-10.1599382,10.4756914],[-10.1608759,10.4742456],[-10.1617022,10.4735759],[-10.162815,10.473203],[-10.1639031,10.4727977],[-10.1648263,10.4726598],[-10.1680493,10.4724248],[-10.1684862,10.4724897],[-10.1692693,10.4727977],[-10.169937,10.4732759],[-10.1706789,10.4742568],[-10.171701,10.4758697],[-10.1719813,10.4763804],[-10.1723522,10.4770451],[-10.1727314,10.4773207],[-10.173193,10.4774018],[-10.1738689,10.4773855],[-10.174413,10.4772559],[-10.1748004,10.4770774],[-10.1758225,10.4769235],[-10.1767457,10.4769559],[-10.1773557,10.4770208],[-10.1779245,10.4769721],[-10.1782789,10.4768506],[-10.1787488,10.476348],[-10.1792269,10.4755537],[-10.1795731,10.4742891],[-10.1798616,10.4725789],[-10.18001,10.4713873],[-10.1798204,10.4705687],[-10.1795154,10.4695716],[-10.1792928,10.4685341],[-10.1791362,10.4665401],[-10.1791335,10.4654986],[-10.1793423,10.4644569],[-10.1794125,10.4636207],[-10.1795236,10.4627627],[-10.1795648,10.46226],[-10.1797957,10.4617008],[-10.1800429,10.4612793],[-10.1803067,10.4609389],[-10.1810651,10.4601931],[-10.1817245,10.4593663],[-10.182285,10.4588474],[-10.1827137,10.4585476],[-10.1832,10.4583368],[-10.1840161,10.4582639],[-10.1845849,10.4582475],[-10.1851784,10.4584179],[-10.1859944,10.4587826],[-10.1865632,10.4590906],[-10.187371,10.4592852],[-10.1879645,10.459269],[-10.1884673,10.4592366],[-10.1889372,10.4590583],[-10.1892339,10.4588313],[-10.1899181,10.4580855],[-10.1902808,10.4573884],[-10.1906188,10.4567398],[-10.1917645,10.4545998],[-10.1923003,10.4536758],[-10.1926053,10.4531327],[-10.1926053,10.4528003],[-10.1925394,10.4524841],[-10.1919803,10.4514738],[-10.1913786,10.4504524],[-10.1903812,10.4490825],[-10.1890046,10.4475178],[-10.1884111,10.4468775],[-10.1874219,10.4460669],[-10.186779,10.4457425],[-10.1863091,10.4454103],[-10.1854189,10.4444699],[-10.1845699,10.4431242],[-10.18414,10.4423123],[-10.1834323,10.441122],[-10.1830284,10.4407571],[-10.1827646,10.4405059],[-10.1825091,10.4401086],[-10.1824514,10.4397438],[-10.182608,10.4392655],[-10.1828058,10.4388602],[-10.1832262,10.4384225],[-10.1836054,10.4382278],[-10.1841824,10.4379766],[-10.1845946,10.4378388],[-10.1850727,10.4377657],[-10.1859217,10.4378712],[-10.1868779,10.437782],[-10.1879165,10.4375632],[-10.1886749,10.4372308],[-10.1893178,10.4369552],[-10.1898454,10.4368659],[-10.1908346,10.4370524],[-10.1922111,10.4375226],[-10.1928294,10.437936],[-10.1934476,10.4383819],[-10.193868,10.4389008],[-10.1943296,10.4401411],[-10.1945192,10.4411624],[-10.1950632,10.4427999],[-10.1957804,10.443943],[-10.1963327,10.4445672],[-10.1970003,10.4452886],[-10.1982255,10.4474676],[-10.1985152,10.4482484],[-10.1988102,10.4491716],[-10.1993842,10.4502899],[-10.200347,10.4522034],[-10.2012242,10.4534393],[-10.201943,10.4545578],[-10.2022005,10.4550959],[-10.202449,10.4555837],[-10.2026138,10.4560457],[-10.2032733,10.4566698],[-10.2040234,10.4571482],[-10.204823,10.4578291],[-10.2054742,10.4588585],[-10.2057709,10.4596611],[-10.2063182,10.4620916],[-10.2067468,10.4636804],[-10.2072249,10.4649449],[-10.207769,10.466096],[-10.2086262,10.4672712],[-10.210654,10.4692166],[-10.2113217,10.4700597],[-10.2120718,10.4713728],[-10.2128632,10.4731237],[-10.2135721,10.4743963],[-10.2144541,10.4753365],[-10.215369,10.4760823],[-10.2183131,10.4775474],[-10.2194576,10.4781168],[-10.2206858,10.4785869],[-10.2220789,10.4789029],[-10.2229938,10.479211],[-10.2237934,10.4794542],[-10.2243375,10.4795191],[-10.2253184,10.4795191],[-10.2268516,10.4793568],[-10.2302477,10.4791056],[-10.2308818,10.4788129],[-10.2314842,10.4782141],[-10.2318716,10.4777115],[-10.2322508,10.4772657],[-10.2324898,10.4769576],[-10.2329267,10.4766578],[-10.2334625,10.4765362],[-10.2338582,10.4766091],[-10.2342126,10.476828],[-10.2346083,10.4772009],[-10.2347979,10.477606],[-10.2350039,10.4781897],[-10.2350864,10.4789598],[-10.2349545,10.4796649],[-10.2344924,10.4809497],[-10.2336521,10.4825504],[-10.2329762,10.4838555],[-10.2319293,10.4852657],[-10.2314265,10.4861169],[-10.2305774,10.4881188],[-10.2303219,10.4893023],[-10.2300993,10.490437],[-10.2297779,10.4915311],[-10.229613,10.4921067],[-10.2295306,10.4928605],[-10.2295883,10.4940032],[-10.2298438,10.4945788],[-10.2302972,10.4955109],[-10.2309813,10.4962645],[-10.2319293,10.4970589],[-10.2322755,10.497756],[-10.232292,10.4982666],[-10.2320942,10.4988419],[-10.2315254,10.499839],[-10.2309978,10.5007467],[-10.2299674,10.5019543],[-10.2296377,10.5023515],[-10.2283353,10.503397],[-10.227239,10.5039724],[-10.2213617,10.5064769],[-10.2194988,10.5070037],[-10.2175287,10.5074494],[-10.2168445,10.5077899],[-10.2158307,10.5084302],[-10.2148827,10.5091595],[-10.2144953,10.5095243],[-10.2142397,10.5100349],[-10.2139512,10.5109588],[-10.2136133,10.512061],[-10.2135061,10.5130174],[-10.2135308,10.5138603],[-10.2135556,10.5145491],[-10.2137616,10.5153191],[-10.2143468,10.516162],[-10.215487,10.517369],[-10.2163442,10.5179932],[-10.2170943,10.5182687],[-10.2179681,10.5183174],[-10.2193117,10.5181553],[-10.2202432,10.5179932],[-10.2215539,10.5175959],[-10.224678,10.5167207],[-10.2289231,10.515189],[-10.232039,10.514492],[-10.2339102,10.5137301],[-10.2356248,10.5131709],[-10.2378174,10.5126685],[-10.2395402,10.5124172],[-10.2430847,10.5120525],[-10.2450548,10.5119146],[-10.248385,10.5124983],[-10.2514019,10.5126521],[-10.2552679,10.5128386],[-10.256661,10.5126685],[-10.2590432,10.5123685],[-10.2596367,10.5122794],[-10.2605022,10.5122227],[-10.261104,10.5121984],[-10.2619612,10.5122875],[-10.2629339,10.5127413],[-10.2648051,10.5134222],[-10.2665856,10.5138598],[-10.2680611,10.5144027],[-10.2688442,10.5147594],[-10.2697096,10.5150188],[-10.2705421,10.515189],[-10.2711768,10.5152619],[-10.2717787,10.5151484],[-10.2725947,10.514727],[-10.2730481,10.5143542],[-10.2734603,10.5140624],[-10.2741527,10.5137545],[-10.2745648,10.5136491],[-10.2750347,10.5136733],[-10.2757518,10.5138517],[-10.2782907,10.5149782],[-10.2821484,10.5166072],[-10.2837557,10.5173691],[-10.2844069,10.5178797],[-10.2850581,10.5183255],[-10.2860639,10.5186252],[-10.2867891,10.5187631],[-10.2875228,10.5187712],[-10.2881163,10.5186821],[-10.2888417,10.5186821],[-10.2896824,10.5188279],[-10.2901112,10.5191439],[-10.2904243,10.5196384],[-10.2908392,10.5213819],[-10.2911745,10.523034],[-10.2918174,10.5254898],[-10.2921306,10.5264299],[-10.2921554,10.5271836],[-10.2920152,10.5283182],[-10.2915866,10.5292664],[-10.2910673,10.5306603],[-10.2908612,10.5326053],[-10.2912734,10.5355714],[-10.291257,10.5363088],[-10.2910591,10.5369005],[-10.2908943,10.537411],[-10.2907541,10.5384483],[-10.2907541,10.5393235],[-10.2908613,10.5400609],[-10.2916691,10.5446072],[-10.2918587,10.5454744],[-10.2918587,10.5465684],[-10.2920071,10.5475327],[-10.2922049,10.5478326],[-10.2927737,10.5482621],[-10.2932022,10.5485133],[-10.2936969,10.548578],[-10.2941996,10.548643],[-10.2948673,10.5486511],[-10.2953373,10.5484566],[-10.2960297,10.5480109],[-10.2964666,10.5476138],[-10.2968375,10.5470789],[-10.2974804,10.546463],[-10.2981316,10.5458391],[-10.2987251,10.545296],[-10.2996072,10.5445263],[-10.3002171,10.5436429],[-10.3007117,10.5428406],[-10.301808,10.5412846],[-10.3025417,10.5404095],[-10.3031269,10.5395505],[-10.3034154,10.5387724],[-10.3036462,10.5379054],[-10.3039347,10.5366329],[-10.304248,10.5357254],[-10.3046849,10.5350122],[-10.3049569,10.5347609],[-10.3058306,10.5339992],[-10.3064077,10.5333266],[-10.3069681,10.5323622],[-10.3074133,10.5315192],[-10.3082375,10.5295824],[-10.3085591,10.5287314],[-10.3086909,10.527686],[-10.3089134,10.5270134],[-10.3092927,10.5264055],[-10.3102241,10.5254006],[-10.3110485,10.5246873],[-10.3114935,10.5243146],[-10.3119387,10.5241606],[-10.3133482,10.5240715],[-10.3143621,10.5239905],[-10.3152276,10.5236663],[-10.3161097,10.5231961],[-10.3174616,10.5219805],[-10.3184094,10.5212917],[-10.3192256,10.5209269],[-10.3210802,10.5204406],[-10.3234048,10.5198895],[-10.3258282,10.5194033],[-10.3286391,10.5186252],[-10.3302052,10.5181796],[-10.3308234,10.5178392],[-10.3313262,10.5173691],[-10.3317302,10.5169476],[-10.3323649,10.5160967],[-10.332744,10.5155294],[-10.3330079,10.5149133],[-10.333148,10.5141516],[-10.3331068,10.513406],[-10.332876,10.5121984],[-10.3325793,10.5113878],[-10.331433,10.5097624],[-10.3306911,10.5089115],[-10.3304026,10.5083037],[-10.3302377,10.5077444],[-10.3304191,10.5071204],[-10.3306911,10.5064881],[-10.3312681,10.5054994],[-10.3322208,10.5039891],[-10.3329579,10.5034651],[-10.3337163,10.5030355],[-10.334112,10.5028814],[-10.3348538,10.5028248],[-10.3358677,10.5028977],[-10.3364942,10.5030273],[-10.3370781,10.5032286],[-10.3374586,10.5033597],[-10.3385714,10.5039026],[-10.3411515,10.5046645],[-10.342965,10.5048105],[-10.3442179,10.50477],[-10.3454626,10.5045672],[-10.3499056,10.5028571],[-10.3504002,10.5026546],[-10.3512575,10.5024114],[-10.3518427,10.502144],[-10.3522054,10.5019089],[-10.3527,10.5017792],[-10.3531616,10.5019414],[-10.353698,10.5021568],[-10.354126,10.5025168],[-10.3543981,10.5029868],[-10.3545382,10.5035785],[-10.3546542,10.5044418],[-10.3545432,10.5054501],[-10.3536067,10.5074364],[-10.3526341,10.5091141],[-10.3519993,10.510192],[-10.3510844,10.5122507],[-10.3505898,10.5136042],[-10.3504579,10.5142443],[-10.3505155,10.5150549],[-10.3510925,10.51747],[-10.3513234,10.5190665],[-10.3518179,10.5207443],[-10.3519992,10.5214899],[-10.352057,10.5227216],[-10.3524279,10.5240671],[-10.3528483,10.5247803],[-10.3535984,10.5255745],[-10.3541424,10.5260121],[-10.3547194,10.5262877],[-10.3552801,10.5265226],[-10.3559394,10.5269198],[-10.3564917,10.5274709],[-10.3577199,10.5290593],[-10.3583711,10.5297725],[-10.3589976,10.5301777],[-10.3599044,10.5304694],[-10.3627894,10.5310935],[-10.3641412,10.531288],[-10.3649078,10.5312961],[-10.3652293,10.5311988],[-10.3661278,10.5308828],[-10.3668449,10.530664],[-10.3685843,10.5308989],[-10.3701504,10.5312231],[-10.3738269,10.5321955],[-10.3765552,10.5325927],[-10.3781132,10.5325765],[-10.3790117,10.5323172],[-10.3796464,10.5318472],[-10.3800997,10.5312961],[-10.3803801,10.5308584],[-10.3807427,10.5300318],[-10.3808416,10.528954],[-10.3808334,10.5280139],[-10.3804213,10.5265064],[-10.3798031,10.5246748],[-10.3797618,10.5239941],[-10.3797865,10.5234349],[-10.3800338,10.5226488],[-10.3803058,10.5219356],[-10.3808251,10.5214656],[-10.3813444,10.5211171],[-10.3819463,10.5208171],[-10.3824078,10.5205254],[-10.3831991,10.5203796],[-10.3837597,10.5204443],[-10.3844191,10.5208415],[-10.3850951,10.5214574],[-10.386686,10.5233943],[-10.3884995,10.5253799],[-10.3908735,10.5288242],[-10.3924478,10.5305424],[-10.3937338,10.5318065],[-10.3946984,10.532835],[-10.3953,10.5334761],[-10.3967425,10.5347645],[-10.3978306,10.535648],[-10.3988692,10.5364503],[-10.399471,10.5365961],[-10.4002705,10.5361667],[-10.4007404,10.535648],[-10.4010783,10.5352428],[-10.4017625,10.5347645],[-10.4021603,10.5345357],[-10.402694,10.5339056],[-10.4030072,10.5330466],[-10.4031886,10.5316607],[-10.4037325,10.5290593],[-10.4040541,10.5271142],[-10.4045347,10.525659],[-10.4047795,10.5249179],[-10.4053234,10.5237105],[-10.4063127,10.5218139],[-10.406634,10.5209631],[-10.4067001,10.5197959],[-10.4060406,10.5169999],[-10.4057372,10.5161995],[-10.4054475,10.515535],[-10.405056,10.5148228],[-10.4050762,10.5140418],[-10.4055213,10.5135555],[-10.4060983,10.5130448],[-10.4090411,10.5118129],[-10.4126021,10.5103298],[-10.4144733,10.5093654],[-10.4156603,10.508417],[-10.4174832,10.5077332],[-10.4183392,10.507412],[-10.4197818,10.506861],[-10.4205896,10.506788],[-10.4223866,10.5070798],[-10.4237467,10.5069178],[-10.4248849,10.5067444],[-10.424895,10.5067429],[-10.4412931,10.5030794],[-10.4482965,10.5183492],[-10.4500256,10.5221193],[-10.4731099,10.5572929],[-10.4767801,10.5617441],[-10.4768506,10.5618295],[-10.5261407,10.6216],[-10.5757023,10.677127],[-10.6222901,10.7092696],[-10.675321,10.7725708],[-10.7486721,10.8085979],[-10.8344136,10.8270966],[-10.88794,10.8392661],[-10.8924006,10.8694445],[-10.8676198,10.9059466],[-10.8190495,10.9229794],[-10.8026942,10.9482834],[-10.801914,10.9514478],[-10.8017376,10.9521632],[-10.8007523,10.9561587],[-10.791295,10.9945063],[-10.7362817,11.0446134],[-10.7080316,11.0733117],[-10.6758166,11.1234054],[-10.7047203,11.1348186]]]]}]}
