# Supplementary material
Source: ML conference proceedings conference paper supplement (https://proceedings.neurips.cc/paper_files/paper/2022/hash/9d3faa41886997cfc2128b930077fa49-Abstract.html)
Supplement: Supplementary file 1 [file 9d3faa41886997cfc2128b930077fa49-Supplemental-Conference.zip › code/ebola/map/geojson/kenema.geojson]

{"type":"GeometryCollection","geometries":[{"type":"MultiPolygon","coordinates":[[[[-11.6024767,8.4963168],[-11.5773424,8.4563269],[-11.5590292,8.4467666],[-11.5636075,8.432174],[-11.5569943,8.4211033],[-11.5656423,8.4095292],[-11.5478377,8.3833602],[-11.5478377,8.363229],[-11.5315593,8.3531631],[-11.4959501,8.3461167],[-11.4852674,8.3330303],[-11.4725499,8.2842042],[-11.4460974,8.2620542],[-11.4328711,8.25702],[-11.4245502,8.2446677],[-11.4216797,8.2404065],[-11.4155753,8.2227854],[-11.3920626,8.2082786],[-11.3764052,8.198618],[-11.3697921,8.1814985],[-11.3769139,8.1689102],[-11.3575833,8.126107],[-11.3572554,8.1211301],[-11.3550628,8.0878457],[-11.3545311,8.0797737],[-11.3504614,8.0676859],[-11.3527768,8.0643354],[-11.3570746,8.0581161],[-11.3463918,8.0102638],[-11.3514788,7.9906175],[-11.3516284,7.9903636],[-11.3643362,7.96879],[-11.3657225,7.9664362],[-11.4028577,7.9387266],[-11.4354146,7.9150461],[-11.4492212,7.9096331],[-11.4598323,7.9054727],[-11.4642089,7.898283],[-11.4677005,7.8925469],[-11.4806891,7.8712083],[-11.48425,7.8490358],[-11.479163,7.8404688],[-11.4832326,7.8243422],[-11.4720412,7.8112389],[-11.4481322,7.8298858],[-11.4384668,7.8233342],[-11.4221884,7.7981351],[-11.4131557,7.7878708],[-11.4067161,7.7759095],[-11.4038338,7.7541249],[-11.405289,7.7549114],[-11.4075381,7.7547804],[-11.4076704,7.752683],[-11.408861,7.7520275],[-11.4111101,7.7547804],[-11.411507,7.7518964],[-11.4148144,7.7508477],[-11.4156082,7.7491436],[-11.413756,7.7484882],[-11.4128299,7.746784],[-11.4109778,7.745342],[-11.4156082,7.7441622],[-11.4140206,7.739574],[-11.4125653,7.739574],[-11.4113747,7.7368211],[-11.415079,7.7370833],[-11.4156082,7.7345925],[-11.4181218,7.7330194],[-11.4161373,7.7301354],[-11.413756,7.7284311],[-11.4148144,7.7262025],[-11.416005,7.7244983],[-11.4173175,7.7263172],[-11.4178203,7.7258306],[-11.4180366,7.7250426],[-11.4183757,7.7241446],[-11.4188084,7.7232176],[-11.4197614,7.7226672],[-11.4205273,7.722308],[-11.421112,7.7217981],[-11.4211061,7.7210218],[-11.4203461,7.720089],[-11.419814,7.7194575],[-11.4204097,7.7184181],[-11.4204552,7.7177749],[-11.4204304,7.7169842],[-11.4202278,7.7164353],[-11.4197523,7.7157921],[-11.4195374,7.7153496],[-11.4198474,7.7149563],[-11.4203725,7.7149358],[-11.4208645,7.7147187],[-11.4209099,7.7142516],[-11.4208727,7.7135347],[-11.4206081,7.7129161],[-11.4204676,7.7122729],[-11.4205254,7.7119492],[-11.4208438,7.7115477],[-11.4213688,7.711347],[-11.4217202,7.7115436],[-11.4220055,7.7116788],[-11.422452,7.7117567],[-11.4226794,7.7114699],[-11.422853,7.710966],[-11.4229399,7.7104252],[-11.4230556,7.709868],[-11.4231135,7.7094214],[-11.4231218,7.7087864],[-11.4232913,7.7081063],[-11.4233864,7.7075328],[-11.423192,7.7070247],[-11.4231631,7.7067216],[-11.4233409,7.7061111],[-11.4235972,7.7055253],[-11.4238742,7.705177],[-11.4239321,7.7046526],[-11.4238494,7.7040504],[-11.4239362,7.7037144],[-11.4241925,7.7032187],[-11.4246266,7.7027557],[-11.4251021,7.7021944],[-11.425747,7.7019937],[-11.4263796,7.7020429],[-11.4269956,7.7023255],[-11.4274338,7.7026246],[-11.4278555,7.7031736],[-11.4283516,7.7035137],[-11.428732,7.7037964],[-11.4291495,7.7040381],[-11.4295299,7.7037841],[-11.4301087,7.7031531],[-11.4304559,7.7027967],[-11.4307288,7.7021822],[-11.4312456,7.7018831],[-11.4316177,7.701879],[-11.431688,7.7013505],[-11.4322585,7.7010678],[-11.4326471,7.7007769],[-11.4331474,7.7003877],[-11.4336641,7.6998551],[-11.434367,7.6996461],[-11.4348507,7.6999001],[-11.4358925,7.700064],[-11.4365664,7.699896],[-11.4371865,7.7000312],[-11.437786,7.7001869],[-11.4384144,7.7000804],[-11.439047,7.6997567],[-11.4396423,7.6995355],[-11.4399813,7.6989988],[-11.440002,7.6983638],[-11.4397787,7.6975976],[-11.4395183,7.6971101],[-11.4392991,7.6964013],[-11.4393942,7.6955286],[-11.4396216,7.6946805],[-11.4397539,7.6939595],[-11.4396878,7.693308],[-11.4399069,7.6927959],[-11.4404071,7.6930827],[-11.4408702,7.6932793],[-11.441511,7.6932384],[-11.4419823,7.692714],[-11.4425735,7.6928],[-11.4427967,7.6934105],[-11.4433383,7.6937792],[-11.4438303,7.694025],[-11.4444876,7.6943405],[-11.4451409,7.6942831],[-11.4459718,7.6940332],[-11.4465093,7.6939513],[-11.4469021,7.6941192],[-11.4475139,7.6943856],[-11.4479398,7.6945781],[-11.4479852,7.694996],[-11.4478199,7.695627],[-11.4475635,7.6962948],[-11.447485,7.6967782],[-11.4474147,7.6972821],[-11.4476669,7.6976181],[-11.4480886,7.6976468],[-11.4485847,7.6974255],[-11.4490436,7.6972207],[-11.4495356,7.6967905],[-11.4499945,7.6964259],[-11.4506312,7.6961227],[-11.4513588,7.6958646],[-11.4520616,7.695967],[-11.4526446,7.6959711],[-11.452967,7.6957458],[-11.4532316,7.6953279],[-11.4530786,7.6950288],[-11.4528595,7.6945126],[-11.4528223,7.6940742],[-11.453029,7.6931319],[-11.4532482,7.692759],[-11.4537732,7.6923657],[-11.4577088,7.695915],[-11.4581645,7.7035337],[-11.4644106,7.7149673],[-11.4847587,7.713455],[-11.5117199,7.6892576],[-11.5198591,7.6887535],[-11.5366463,7.6680837],[-11.5152808,7.6469088],[-11.5039507,7.6396146],[-11.4892034,7.6209535],[-11.5073874,7.5494059],[-11.5025633,7.5435398],[-11.4873022,7.5440441],[-11.4725499,7.5390011],[-11.4583062,7.5475742],[-11.44508,7.5768223],[-11.426258,7.6020346],[-11.4089621,7.6156486],[-11.3944481,7.6324917],[-11.3705819,7.6570904],[-11.3672486,7.6065726],[-11.3439233,7.5953128],[-11.3111341,7.5997671],[-11.3147875,7.5969943],[-11.3147731,7.5938365],[-11.3161137,7.5928935],[-11.3176889,7.5914686],[-11.3228887,7.5871351],[-11.3255514,7.587708],[-11.3302276,7.5880069],[-11.3342402,7.5874936],[-11.3411542,7.5788038],[-11.3407197,7.5720783],[-11.3425236,7.5706188],[-11.3437148,7.5689392],[-11.343725,7.5674735],[-11.3433964,7.5668933],[-11.3423388,7.5660687],[-11.3413633,7.5659262],[-11.3398846,7.5651933],[-11.3376872,7.5644299],[-11.3367938,7.5634934],[-11.3380368,7.5629402],[-11.341109,7.5581241],[-11.3432601,7.5545552],[-11.3436339,7.5520226],[-11.3369654,7.5539491],[-11.3338407,7.5513005],[-11.3327652,7.5470468],[-11.333286,7.5413707],[-11.3345781,7.5395005],[-11.3360597,7.5371141],[-11.3340544,7.5339116],[-11.3340671,7.532041],[-11.335266,7.52929],[-11.3369912,7.5279056],[-11.3384527,7.524736],[-11.3415476,7.5227047],[-11.3452677,7.5222941],[-11.3462636,7.5239252],[-11.3464587,7.525157],[-11.3489397,7.525952],[-11.3532795,7.5248578],[-11.3566759,7.5213896],[-11.35785,7.5176813],[-11.3606073,7.5151699],[-11.3624131,7.5099528],[-11.3646442,7.5050814],[-11.3643772,7.5047251],[-11.3627548,7.5048982],[-11.3615123,7.5042874],[-11.3600337,7.5036562],[-11.3582675,7.5002253],[-11.3585755,7.4987796],[-11.3597051,7.4982401],[-11.3613275,7.4957356],[-11.3610577,7.493896],[-11.3602596,7.4933486],[-11.3597051,7.4911902],[-11.3568915,7.4899685],[-11.3556028,7.489149],[-11.3555309,7.4885585],[-11.355685,7.4873368],[-11.3555463,7.4867005],[-11.355726,7.4864663],[-11.355261,7.4859277],[-11.3541652,7.4843028],[-11.3527733,7.4827226],[-11.3530754,7.4807587],[-11.3542009,7.4784766],[-11.3543528,7.4767686],[-11.3557257,7.4737827],[-11.3551795,7.4728249],[-11.3524754,7.4680817],[-11.3474263,7.4404546],[-11.3396979,7.4261632],[-11.3011442,7.3968547],[-11.2869189,7.3806545],[-11.2558881,7.3746007],[-11.2500205,7.3711689],[-11.2360488,7.3629972],[-11.2111224,7.3463481],[-11.1448398,7.338713],[-11.1448057,7.3388916],[-11.1445349,7.3395957],[-11.1440959,7.3405035],[-11.1436102,7.3410778],[-11.141957,7.3425229],[-11.1413499,7.3432733],[-11.1408362,7.3436438],[-11.1403038,7.3444404],[-11.1399022,7.3445701],[-11.1385853,7.345552],[-11.1375672,7.3456539],[-11.1363904,7.346219],[-11.1348517,7.3472484],[-11.133,7.3483032],[-11.1322434,7.3489331],[-11.1320846,7.3489424],[-11.1300579,7.3506005],[-11.1294321,7.3512397],[-11.1293294,7.3514898],[-11.1279564,7.3523791],[-11.1276015,7.3535092],[-11.1276575,7.3542965],[-11.1277602,7.3547412],[-11.1281619,7.3553525],[-11.1280965,7.356529],[-11.1269103,7.3589003],[-11.1261724,7.3610957],[-11.124239,7.3642107],[-11.1219663,7.3661905],[-11.1205229,7.3663428],[-11.1165611,7.3692973],[-11.1148412,7.3698912],[-11.1139045,7.3714902],[-11.1132596,7.3730284],[-11.1138738,7.3737898],[-11.1140734,7.3746274],[-11.113751,7.3759523],[-11.1130907,7.3766224],[-11.1115551,7.376668],[-11.1095588,7.377262],[-11.1052592,7.3819372],[-11.1024491,7.386262],[-11.1024491,7.3868103],[-11.1030172,7.3876326],[-11.1033243,7.3883788],[-11.1030633,7.3896884],[-11.1021112,7.390724],[-11.1007139,7.390861],[-11.0992704,7.3902823],[-11.0978577,7.3894752],[-11.0972741,7.3890032],[-11.0965217,7.3890488],[-11.0920992,7.3923838],[-11.089782,7.3922279],[-11.0876322,7.3918015],[-11.086588,7.3917406],[-11.0856974,7.3915883],[-11.0850217,7.3912532],[-11.084561,7.3907355],[-11.0839775,7.3906746],[-11.0830255,7.3910705],[-11.0827798,7.3913751],[-11.081582,7.3915274],[-11.0801079,7.3921669],[-11.0784801,7.3930197],[-11.0766989,7.3946035],[-11.0742419,7.3962785],[-11.0702331,7.3976925],[-11.0677574,7.3988554],[-11.0649777,7.4006752],[-11.0632947,7.4016551],[-11.0606453,7.4034102],[-11.0595045,7.4038607],[-11.0578415,7.4051811],[-11.0566688,7.4064086],[-11.0555613,7.4082176],[-11.053976,7.4097466],[-11.0515003,7.4115771],[-11.0496544,7.4123523],[-11.0504284,7.4127634],[-11.0475473,7.4152113],[-11.0450354,7.4176782],[-11.0435847,7.4194166],[-11.042649,7.4221691],[-11.0419225,7.4243211],[-11.0411319,7.4249819],[-11.038841,7.4240844],[-11.0375623,7.4241278],[-11.0353859,7.4247728],[-11.0338109,7.4257652],[-11.0334389,7.4260887],[-11.032851,7.4265914],[-11.033031,7.4283693],[-11.0328514,7.4299575],[-11.0334818,7.4328612],[-11.034104,7.4343505],[-11.0336642,7.4357443],[-11.0327844,7.4364145],[-11.0318403,7.4360421],[-11.0283673,7.4320249],[-11.0279378,7.4321684],[-11.0276373,7.4320828],[-11.0269668,7.432409],[-11.0264358,7.4330023],[-11.0260934,7.4337707],[-11.0262796,7.4348556],[-11.0267561,7.4354202],[-11.027245,7.4360788],[-11.0269719,7.4371725],[-11.0257389,7.4382222],[-11.0238182,7.4387195],[-11.0194723,7.439231],[-11.0147994,7.4423072],[-11.0104636,7.4420374],[-11.0095021,7.4428385],[-11.0093514,7.443306],[-11.009309,7.444034],[-11.0093044,7.4450241],[-11.0095738,7.4456954],[-11.0099555,7.4465563],[-11.0100704,7.4472587],[-11.0102936,7.448019],[-11.0097958,7.4484949],[-11.0093123,7.4491511],[-11.0082012,7.4506931],[-11.0071116,7.4517185],[-11.0044825,7.454099],[-11.0038394,7.4546611],[-11.00345,7.455095],[-11.0025655,7.4549144],[-11.0014151,7.4546457],[-11.0007392,7.454438],[-11.0001996,7.4545447],[-10.9993987,7.4551044],[-10.9976287,7.4567995],[-10.9922992,7.4639628],[-10.9910424,7.4651078],[-10.9902387,7.4657953],[-10.9893681,7.4661988],[-10.9881577,7.4664915],[-10.9873144,7.4666045],[-10.9864133,7.4669267],[-10.9852917,7.4678091],[-10.9835551,7.4691491],[-10.9827365,7.4698815],[-10.9823534,7.4700693],[-10.9823324,7.4704837],[-10.9823647,7.4708905],[-10.9821507,7.4711422],[-10.9815418,7.4713355],[-10.9807299,7.4712539],[-10.9791358,7.4707652],[-10.9780838,7.4706686],[-10.9772634,7.4707447],[-10.9765213,7.4710589],[-10.9755186,7.4719031],[-10.9751693,7.4723439],[-10.9749648,7.4729325],[-10.9748492,7.4735313],[-10.9750299,7.4743644],[-10.9755616,7.4752304],[-10.9760221,7.4755591],[-10.9769125,7.4760203],[-10.9769038,7.4765632],[-10.9763682,7.4773641],[-10.9754718,7.4782522],[-10.9744344,7.4789003],[-10.9735802,7.4800681],[-10.9733818,7.4803395],[-10.9728259,7.4808497],[-10.9724803,7.4810402],[-10.9717675,7.4826337],[-10.9708462,7.4841385],[-10.9698219,7.4851282],[-10.9686316,7.4863265],[-10.9666158,7.4876388],[-10.9658231,7.4884408],[-10.964067,7.4887541],[-10.9621889,7.4893621],[-10.9615042,7.4897745],[-10.9610964,7.4902767],[-10.9610309,7.4913086],[-10.9612733,7.4923564],[-10.9614422,7.493042],[-10.9612804,7.4933767],[-10.960411,7.4934699],[-10.9587895,7.4930092],[-10.9575298,7.4926721],[-10.9566633,7.4930084],[-10.9563413,7.4933603],[-10.9563539,7.4938908],[-10.9564908,7.4946845],[-10.9561117,7.4961778],[-10.9554752,7.49692],[-10.9542532,7.4978546],[-10.9528807,7.4985351],[-10.9514294,7.4993334],[-10.950224,7.5004392],[-10.9490243,7.5020039],[-10.9479437,7.5027204],[-10.946254,7.5038864],[-10.9441545,7.5049762],[-10.9417984,7.505692],[-10.9404414,7.5061118],[-10.9395076,7.5063167],[-10.938896,7.5069974],[-10.9380806,7.5081782],[-10.9370077,7.5095929],[-10.9359563,7.5111139],[-10.9351558,7.5119851],[-10.9343577,7.5125711],[-10.9336388,7.5130179],[-10.9329523,7.5136668],[-10.9322441,7.5124754],[-10.932051,7.5111883],[-10.9318616,7.5099858],[-10.9317245,7.5090954],[-10.9312141,7.5085824],[-10.9305812,7.5082526],[-10.9296585,7.507274],[-10.9292036,7.5065135],[-10.9286393,7.5058487],[-10.928092,7.5054126],[-10.9279419,7.505136],[-10.9277272,7.5046893],[-10.9278132,7.5042531],[-10.9279525,7.5037958],[-10.9283281,7.5034873],[-10.9287251,7.5029555],[-10.928886,7.5020726],[-10.9288645,7.5011897],[-10.9281573,7.5006502],[-10.9268718,7.5001248],[-10.9251845,7.499424],[-10.9244892,7.499107],[-10.9239211,7.4985571],[-10.9233821,7.497695],[-10.9228456,7.4974667],[-10.9222878,7.4974561],[-10.9213757,7.4980943],[-10.9204134,7.4992622],[-10.9198359,7.4996213],[-10.9187044,7.5004982],[-10.918339,7.5010439],[-10.9180304,7.5018209],[-10.9175778,7.5034127],[-10.9162904,7.5044127],[-10.9154588,7.5045136],[-10.9143377,7.5042532],[-10.9135696,7.5047695],[-10.9129751,7.5051148],[-10.9113979,7.5059125],[-10.9103384,7.5066527],[-10.9083757,7.5075663],[-10.9073103,7.5092418],[-10.9049285,7.5102417],[-10.9031261,7.5114437],[-10.9019244,7.5120925],[-10.9005846,7.5125776],[-10.8999825,7.5122414],[-10.8994032,7.5123691],[-10.8987916,7.5128902],[-10.8980513,7.5133583],[-10.8973325,7.5137625],[-10.8955154,7.5154784],[-10.8955514,7.5165493],[-10.8957339,7.517613],[-10.8956696,7.5187192],[-10.8949615,7.5199104],[-10.8938698,7.5210885],[-10.8930597,7.5215937],[-10.8926359,7.521732],[-10.8921585,7.522184],[-10.8906055,7.5235056],[-10.8896185,7.5247926],[-10.8891141,7.5251649],[-10.8885855,7.5254866],[-10.8879849,7.5259174],[-10.887647,7.5260451],[-10.8872656,7.526045],[-10.8853404,7.5265397],[-10.8845571,7.5268162],[-10.8838799,7.5267363],[-10.8831793,7.5262448],[-10.8824933,7.5257836],[-10.8818319,7.5252581],[-10.8809395,7.5253079],[-10.8800754,7.5262646],[-10.8787038,7.5274749],[-10.8771407,7.5291343],[-10.8766901,7.5297279],[-10.8759997,7.5303157],[-10.875392,7.5307277],[-10.8746547,7.5309367],[-10.8731561,7.5313525],[-10.8716326,7.5320041],[-10.870605,7.5327643],[-10.8696628,7.533206],[-10.8686614,7.5339438],[-10.8682975,7.5343733],[-10.8680722,7.5347987],[-10.8676216,7.535304],[-10.8671333,7.5356834],[-10.8658604,7.5361886],[-10.8652291,7.5363995],[-10.8645987,7.5366494],[-10.8633086,7.5370217],[-10.8624967,7.5374012],[-10.8617941,7.5378339],[-10.8610026,7.5381942],[-10.8600607,7.5386017],[-10.8595456,7.5390512],[-10.8587096,7.5399802],[-10.8570331,7.5410433],[-10.8560473,7.5415691],[-10.854812,7.5421022],[-10.8538212,7.5425553],[-10.8534382,7.5427304],[-10.8518089,7.543575],[-10.8508746,7.5443297],[-10.8499985,7.5450371],[-10.8493009,7.545565],[-10.8482931,7.5468596],[-10.8469597,7.5476947],[-10.8463366,7.547965],[-10.8450731,7.5483046],[-10.8444076,7.5487374],[-10.8437728,7.5491458],[-10.8431846,7.5499189],[-10.8430322,7.5507803],[-10.8430231,7.5518676],[-10.8431296,7.5523848],[-10.8431722,7.5530763],[-10.8428847,7.553752],[-10.8424959,7.554217],[-10.8415269,7.5545754],[-10.8403022,7.5548235],[-10.8394716,7.5549291],[-10.8385497,7.5552489],[-10.838259,7.5555931],[-10.8378976,7.5560216],[-10.8376694,7.5570553],[-10.8375015,7.5579906],[-10.8371741,7.5588637],[-10.8369676,7.5602249],[-10.8367187,7.5609834],[-10.8359573,7.5618596],[-10.8350202,7.563042],[-10.8336273,7.5639893],[-10.8331885,7.5641979],[-10.8321555,7.5640343],[-10.8310674,7.5633314],[-10.8305528,7.5628308],[-10.8297594,7.5616168],[-10.8291197,7.5617947],[-10.8282844,7.5622977],[-10.8277094,7.5627306],[-10.8267599,7.5629219],[-10.8264528,7.5638021],[-10.826096,7.565412],[-10.8258191,7.5665785],[-10.8251109,7.5691807],[-10.8249417,7.5695931],[-10.8251802,7.5698088],[-10.8256646,7.5698182],[-10.8260694,7.5702627],[-10.8259469,7.5709964],[-10.8254677,7.5716351],[-10.8248234,7.5724954],[-10.8238934,7.5728864],[-10.8202595,7.5749441],[-10.8187222,7.5780969],[-10.8189642,7.578577],[-10.8194317,7.5790506],[-10.8207855,7.5796842],[-10.8221467,7.5795622],[-10.822305,7.5802926],[-10.8217806,7.581553],[-10.8165511,7.5873557],[-10.8149537,7.5891977],[-10.8142242,7.5897255],[-10.8137876,7.5902956],[-10.8136598,7.5906228],[-10.813745,7.5910186],[-10.8139765,7.5914083],[-10.8148525,7.5923645],[-10.8158589,7.5933568],[-10.8165549,7.5942805],[-10.8168972,7.5945074],[-10.8177358,7.5946284],[-10.8179888,7.5948557],[-10.8180686,7.5953677],[-10.8178394,7.595774],[-10.8173604,7.5958902],[-10.816599,7.5959377],[-10.815811,7.5956474],[-10.8144337,7.5951368],[-10.8129623,7.5942224],[-10.8113702,7.5931773],[-10.8099678,7.5927783],[-10.807169,7.5925018],[-10.8048581,7.5927023],[-10.8036505,7.5917247],[-10.802675,7.5917787],[-10.8017165,7.5920795],[-10.8005918,7.5914797],[-10.7998902,7.5913195],[-10.7984791,7.5917892],[-10.7973668,7.5929107],[-10.7963759,7.5938213],[-10.795492,7.5948188],[-10.7944856,7.5967769],[-10.7940172,7.5993222],[-10.794167,7.599444],[-10.816135,7.6106395],[-10.8313296,7.6014954],[-10.8573774,7.6149425],[-10.8704013,7.6041849],[-10.9002479,7.6144047],[-10.9040465,7.6343057],[-10.9192411,7.6520544],[-10.9002479,7.6778695],[-10.9268383,7.7139004],[-10.9100158,7.7284195],[-10.9105585,7.7424003],[-10.9219544,7.7676722],[-10.9398623,7.7725114],[-10.9518008,7.7676722],[-10.9767633,7.7741244],[-10.977306,7.7918673],[-10.9941285,7.8101471],[-11.025603,7.8531552],[-11.02882,7.8636393],[-11.0414743,7.8709375],[-11.0397122,7.9052965],[-11.0337429,7.9429202],[-10.9994,7.9741226],[-10.9935859,8.0176199],[-10.9779295,8.0477982],[-10.9691661,8.0772623],[-10.9203403,8.132539],[-10.9167839,8.1466212],[-10.9114493,8.1585028],[-10.9018915,8.160043],[-10.8976683,8.1662036],[-10.8976683,8.1840249],[-10.8854432,8.2080054],[-10.883665,8.2322044],[-10.8681057,8.2700399],[-10.8794417,8.2764188],[-10.9041142,8.2766387],[-10.9205626,8.2638809],[-10.9245635,8.2438634],[-10.931454,8.2381439],[-10.9390114,8.2482629],[-10.9503474,8.255522],[-10.9621279,8.2709197],[-10.9612388,8.2834574],[-10.9785763,8.3116108],[-10.9530147,8.3472394],[-10.9472355,8.366372],[-10.9416787,8.3782469],[-10.9254214,8.3866714],[-10.9267238,8.3944021],[-10.9367088,8.3939726],[-10.9601518,8.4038505],[-10.9753464,8.3995558],[-10.9918433,8.4068568],[-11.0079061,8.3892483],[-11.0087744,8.369921],[-11.0200618,8.355747],[-11.0300468,8.3514518],[-11.0430707,8.3407134],[-11.0617923,8.3406491],[-11.073779,8.347172],[-11.0779198,8.3448265],[-11.0781404,8.3447016],[-11.0851813,8.3407134],[-11.097337,8.3544584],[-11.1163641,8.3399039],[-11.1338857,8.3409475],[-11.1469588,8.3451729],[-11.1601279,8.3502165],[-11.1682232,8.3526218],[-11.1776051,8.3586585],[-11.2014886,8.3615968],[-11.2251483,8.3371287],[-11.2390547,8.3637783],[-11.2395864,8.3746814],[-11.2544921,8.3931136],[-11.2518461,8.4104377],[-11.2544639,8.4305273],[-11.2325228,8.4571996],[-11.258403,8.4814771],[-11.2502898,8.4921424],[-11.2650663,8.5111432],[-11.2666103,8.5131285],[-11.299483,8.5200206],[-11.3252554,8.5172136],[-11.3325406,8.5184437],[-11.3430547,8.520219],[-11.3608541,8.531811],[-11.3752365,8.539251],[-11.3857945,8.530172],[-11.3908381,8.5258346],[-11.4362862,8.542605],[-11.450531,8.5419342],[-11.4586709,8.5358969],[-11.4878392,8.5365678],[-11.4980141,8.5291887],[-11.5217556,8.5412634],[-11.557707,8.5419342],[-11.5855185,8.5057091],[-11.6024767,8.4963168]]]]}]}
