# Supplementary material
Source: ML conference proceedings conference paper supplement (https://proceedings.neurips.cc/paper_files/paper/2022/hash/9d3faa41886997cfc2128b930077fa49-Abstract.html)
Supplement: Supplementary file 1 [file 9d3faa41886997cfc2128b930077fa49-Supplemental-Conference.zip › code/ebola/map/geojson/kerouane.geojson]

{"type":"GeometryCollection","geometries":[{"type":"MultiPolygon","coordinates":[[[[-9.6159057,11.4207603],[-9.6144104,11.4240204],[-9.6164918,11.4354409],[-9.6144104,11.4492584],[-9.6103335,11.4702883],[-9.6092391,11.4792045],[-9.6126268,11.4797885],[-9.6120232,11.4816437],[-9.6111059,11.4830737],[-9.6106231,11.4837834],[-9.6101671,11.4840935],[-9.610025,11.4844431],[-9.6099016,11.4845561],[-9.6095958,11.4846113],[-9.6090513,11.4851081],[-9.6085766,11.4852579],[-9.6076807,11.4851291],[-9.6074528,11.485137],[-9.6064979,11.4856075],[-9.6063074,11.4856207],[-9.6060205,11.4855182],[-9.6059239,11.4851134],[-9.6053392,11.4848137],[-9.605248,11.4842775],[-9.6045077,11.4835626],[-9.6042556,11.4835468],[-9.6039444,11.4836624],[-9.6022064,11.4825269],[-9.6014875,11.4810076],[-9.6003449,11.4796513],[-9.5992237,11.4789258],[-9.5986819,11.4789153],[-9.5985156,11.4787839],[-9.5979899,11.4776641],[-9.5973623,11.4771279],[-9.5971477,11.4766652],[-9.5971531,11.4761711],[-9.5971906,11.4760344],[-9.5970243,11.4756454],[-9.5964557,11.4755244],[-9.5961553,11.4752511],[-9.5958495,11.4745361],[-9.5955062,11.4744888],[-9.5950234,11.4745887],[-9.5947874,11.4744309],[-9.5947659,11.4740682],[-9.5946211,11.4738789],[-9.5940203,11.4735477],[-9.5936608,11.4730956],[-9.5927382,11.472675],[-9.5926255,11.4723727],[-9.5927247,11.4719837],[-9.593221,11.4709139],[-9.5934516,11.4707772],[-9.5938003,11.4708087],[-9.5940739,11.4706194],[-9.5941222,11.4703461],[-9.5939183,11.4698466],[-9.5936877,11.4694786],[-9.5937198,11.4689056],[-9.5935535,11.4686795],[-9.5931137,11.4684061],[-9.5930761,11.4681801],[-9.5932692,11.4679119],[-9.5936072,11.4676964],[-9.5937038,11.4672075],[-9.5938432,11.4669236],[-9.5937628,11.4666817],[-9.5932317,11.4661507],[-9.5932263,11.4657459],[-9.5934302,11.4647155],[-9.5926362,11.4632119],[-9.5925853,11.4627834],[-9.5918316,11.4616977],[-9.5918477,11.46103],[-9.5916492,11.4607198],[-9.591279,11.4605095],[-9.5912415,11.4602887],[-9.5915633,11.4598208],[-9.5915526,11.4593476],[-9.5912844,11.4589638],[-9.5899594,11.458354],[-9.589895,11.4582173],[-9.5899487,11.4580806],[-9.5913541,11.4575312],[-9.591448,11.4573787],[-9.5914507,11.4571973],[-9.5909035,11.4567662],[-9.5908606,11.4565033],[-9.5909464,11.4562878],[-9.5914346,11.4559776],[-9.5916277,11.4556937],[-9.5916867,11.454537],[-9.5918584,11.454169],[-9.5923036,11.4537799],[-9.592368,11.453333],[-9.5920301,11.4529545],[-9.5920676,11.4526443],[-9.5923305,11.4522236],[-9.592368,11.4518398],[-9.5919603,11.4514245],[-9.591794,11.4506464],[-9.5882535,11.4507515],[-9.578265,11.4520344],[-9.5689523,11.4503414],[-9.5632379,11.4480709],[-9.5625526,11.4474445],[-9.5621797,11.447271],[-9.5617479,11.4472474],[-9.5614368,11.4471475],[-9.5611873,11.446966],[-9.5607072,11.4467294],[-9.5601761,11.44664],[-9.5598543,11.4463876],[-9.5597631,11.445641],[-9.559468,11.44511],[-9.559468,11.4443581],[-9.5592642,11.4438639],[-9.5590228,11.443722],[-9.5483439,11.4086397],[-9.5502325,11.4082196],[-9.55174,11.4077339],[-9.5537394,11.406772],[-9.5553684,11.405393],[-9.5564606,11.4039775],[-9.5581824,11.3995314],[-9.5600355,11.3957027],[-9.5609912,11.3930335],[-9.5615147,11.3910702],[-9.561855,11.3884268],[-9.5620645,11.3857912],[-9.5620322,11.3832354],[-9.5617897,11.3807656],[-9.5612922,11.3786611],[-9.5607816,11.3770698],[-9.5607687,11.3762869],[-9.5609387,11.3758635],[-9.5611717,11.3756011],[-9.5650244,11.3737045],[-9.5667638,11.3731486],[-9.5683624,11.3729859],[-9.5712947,11.3729858],[-9.5740959,11.373358],[-9.5767533,11.3733964],[-9.5781041,11.3736325],[-9.5791073,11.3739164],[-9.5816621,11.3750648],[-9.5832067,11.3754242],[-9.5867673,11.375578],[-9.5881679,11.3758733],[-9.5892283,11.376348],[-9.5897911,11.3771694],[-9.589909,11.3784911],[-9.5897256,11.3797617],[-9.5889295,11.3814894],[-9.5874479,11.3835859],[-9.5863223,11.3851514],[-9.5853404,11.3869095],[-9.5849384,11.3879631],[-9.5847506,11.3889149],[-9.5847398,11.3903243],[-9.5850349,11.3919966],[-9.5850671,11.3928748],[-9.5849545,11.3934321],[-9.5846862,11.3945892],[-9.5841284,11.3965505],[-9.5839807,11.3981335],[-9.5838333,11.3998792],[-9.5832218,11.4023087],[-9.582916,11.4033763],[-9.582755,11.4038233],[-9.5814676,11.4062736],[-9.5813496,11.4069784],[-9.5813227,11.4075042],[-9.5814783,11.4086978],[-9.5817668,11.4093143],[-9.5829187,11.4102895],[-9.5848526,11.4115899],[-9.5870291,11.4130481],[-9.5895195,11.4152393],[-9.5913227,11.4166666],[-9.5948046,11.4185657],[-9.5974804,11.4199926],[-9.600656,11.4211576],[-9.6035228,11.4224021],[-9.6055124,11.4230822],[-9.6076724,11.4234799],[-9.6090192,11.4234158],[-9.6098387,11.4232036],[-9.6112983,11.4228256],[-9.613995,11.4218118],[-9.6159057,11.4207603]]]]}]}
