# Supplementary material
Source: ML conference proceedings conference paper supplement (https://proceedings.neurips.cc/paper_files/paper/2022/hash/9d3faa41886997cfc2128b930077fa49-Abstract.html)
Supplement: Supplementary file 1 [file 9d3faa41886997cfc2128b930077fa49-Supplemental-Conference.zip › code/ebola/map/geojson/kindia.geojson]

{"type":"GeometryCollection","geometries":[{"type":"MultiPolygon","coordinates":[[[[-13.8395965,11.2667117],[-13.8391788,11.2647842],[-13.8395312,11.2611258],[-13.839474,11.2598868],[-13.8387513,11.2579821],[-13.8382857,11.2558919],[-13.8373626,11.2546669],[-13.834338,11.2545477],[-13.8313,11.2551613],[-13.8298854,11.2547],[-13.8277139,11.2547635],[-13.824085,11.2539895],[-13.8196497,11.2539618],[-13.8161986,11.2548198],[-13.8144652,11.2550221],[-13.812377,11.2547383],[-13.811416,11.2538023],[-13.8107639,11.2518813],[-13.8111328,11.2506105],[-13.8103604,11.2499049],[-13.8090317,11.2495255],[-13.8070114,11.2495644],[-13.805599,11.249303],[-13.803936,11.2487138],[-13.8030301,11.2477502],[-13.8022743,11.2461481],[-13.8006153,11.2443388],[-13.7976229,11.2427093],[-13.7957436,11.2422192],[-13.7952259,11.2415457],[-13.7957141,11.238621],[-13.7953024,11.2368156],[-13.7948996,11.2359273],[-13.7933569,11.2360554],[-13.7923892,11.2365593],[-13.7918261,11.2374511],[-13.7913293,11.2378591],[-13.7903953,11.2374672],[-13.7888424,11.2361869],[-13.7882695,11.2351977],[-13.7878854,11.2334392],[-13.7881222,11.2304069],[-13.7873539,11.2287808],[-13.7866449,11.2282831],[-13.7858664,11.2283552],[-13.7847132,11.2281721],[-13.7835601,11.2290671],[-13.7827776,11.2293076],[-13.7817488,11.2284887],[-13.7806753,11.2268749],[-13.7784092,11.2250095],[-13.7776122,11.2238003],[-13.7763515,11.2208176],[-13.7755457,11.2169842],[-13.7742861,11.2155913],[-13.773898,11.2135193],[-13.7742926,11.212896],[-13.7780926,11.2103768],[-13.779457,11.2099526],[-13.7799988,11.2092529],[-13.7797578,11.2076128],[-13.7779974,11.2056377],[-13.7782995,11.2028534],[-13.7823195,11.198514],[-13.7873808,11.1967151],[-13.788479,11.1957861],[-13.7890814,11.1931799],[-13.788937,11.1911736],[-13.787616,11.1902838],[-13.7871658,11.1891953],[-13.787233,11.1880633],[-13.788213,11.1868957],[-13.7901002,11.1859801],[-13.790199,11.1851514],[-13.7897397,11.1846999],[-13.7856243,11.1836961],[-13.778865,11.1832021],[-13.7747071,11.1820701],[-13.7706327,11.1822262],[-13.7691702,11.1826673],[-13.7680329,11.1826155],[-13.7669592,11.1816435],[-13.7660925,11.1809614],[-13.7654089,11.1798986],[-13.764253,11.1755199],[-13.7634924,11.1734423],[-13.762741,11.1724799],[-13.7617281,11.1724096],[-13.7590873,11.1739342],[-13.7578226,11.1751442],[-13.7570286,11.1757495],[-13.7559825,11.1752232],[-13.7551672,11.1739811],[-13.754688,11.1727105],[-13.7539884,11.1686592],[-13.7534715,11.167438],[-13.7524989,11.1663679],[-13.7525444,11.1653361],[-13.7533142,11.1638617],[-13.7536535,11.162282],[-13.753551,11.1599754],[-13.7535686,11.158242],[-13.7532338,11.1573794],[-13.7525717,11.1567604],[-13.7522098,11.1559878],[-13.7521947,11.1545047],[-13.7527358,11.1520404],[-13.7530882,11.1502999],[-13.7530185,11.1487422],[-13.7531967,11.1477608],[-13.7537845,11.1470489],[-13.7536545,11.1463882],[-13.7528984,11.1458096],[-13.7513593,11.1455783],[-13.7499893,11.144293],[-13.7493026,11.1429456],[-13.7489969,11.1422166],[-13.7489348,11.1414632],[-13.7491131,11.141029],[-13.7496534,11.1403495],[-13.7504663,11.139721],[-13.7511055,11.1394074],[-13.7516204,11.138667],[-13.7520935,11.1371408],[-13.7524763,11.1357281],[-13.7523651,11.1344133],[-13.75149,11.1330126],[-13.7510029,11.1316169],[-13.7508476,11.1308188],[-13.7507199,11.1297953],[-13.7507136,11.1287644],[-13.7516346,11.1259135],[-13.7528109,11.1237691],[-13.7530915,11.1227214],[-13.7532714,11.1214269],[-13.7528795,11.1194593],[-13.7529826,11.1183258],[-13.7541048,11.1164728],[-13.7549725,11.1143519],[-13.7554075,11.1138884],[-13.7583,11.1124795],[-13.7589136,11.1115499],[-13.7594724,11.1096654],[-13.7608039,11.1042052],[-13.7607521,11.1008773],[-13.7783257,11.0871913],[-13.7795998,11.0861991],[-13.7803943,11.0855803],[-13.783034,11.0835245],[-13.7843148,11.082527],[-13.8066937,11.0650977],[-13.8151654,11.0584996],[-13.8206804,11.054204],[-13.7895994,10.9711115],[-13.9340117,10.8797377],[-14.0123616,10.7682381],[-13.9584429,10.7033221],[-13.8884819,10.7593651],[-13.7062974,10.7397176],[-13.6539119,10.6794206],[-13.5012456,10.7977972],[-13.4271576,10.797062],[-13.4047067,10.7617744],[-13.4398798,10.7132472],[-13.4106936,10.6794206],[-13.3800106,10.6978051],[-13.3261284,10.6470612],[-13.3867459,10.5926308],[-13.3796961,10.5328419],[-13.3814301,10.5189263],[-13.3837586,10.5191415],[-13.3852846,10.5199274],[-13.3859628,10.5200782],[-13.3867137,10.5197607],[-13.3875938,10.5188557],[-13.3902986,10.5156566],[-13.3914855,10.514569],[-13.3926239,10.5137196],[-13.3949266,10.5129432],[-13.3967416,10.5124018],[-13.3987763,10.5114651],[-13.4004637,10.5104092],[-13.4016383,10.5095033],[-13.4024946,10.5078642],[-13.4036479,10.5050912],[-13.4044285,10.503275],[-13.4057032,10.5024641],[-13.4071419,10.5018466],[-13.4082152,10.5015098],[-13.4099737,10.5013301],[-13.4137075,10.5015434],[-13.415386,10.501622],[-13.4161279,10.501503],[-13.4170645,10.5012966],[-13.4173327,10.501101],[-13.4181706,10.5004948],[-13.4186793,10.5003837],[-13.4189215,10.5005583],[-13.4192283,10.5009632],[-13.4193655,10.5015427],[-13.4195351,10.5020985],[-13.4198904,10.5035592],[-13.4202295,10.5041466],[-13.420835,10.5047341],[-13.421271,10.5049008],[-13.4217393,10.5049723],[-13.4222076,10.5045912],[-13.4227728,10.5039879],[-13.4230957,10.5035592],[-13.4235237,10.5032813],[-13.4245168,10.5029082],[-13.4271085,10.502805],[-13.4290624,10.5021064],[-13.430104,10.5020111],[-13.4326426,10.5031158],[-13.4344639,10.5036306],[-13.4374836,10.503972],[-13.4408989,10.5039005],[-13.4442819,10.5035036],[-13.4465721,10.5027401],[-13.4471724,10.5024795],[-13.4478133,10.502028],[-13.4483512,10.5016221],[-13.4488033,10.5009156],[-13.4503132,10.4983196],[-13.4511448,10.4973749],[-13.451605,10.4970891],[-13.4536316,10.4963031],[-13.4556985,10.4955807],[-13.4565625,10.4951123],[-13.4574022,10.4943581],[-13.4578951,10.4937262],[-13.45913,10.4914365],[-13.4596548,10.4901345],[-13.4597194,10.4897138],[-13.4598082,10.4889992],[-13.4597219,10.4875919],[-13.4596144,10.4852282],[-13.4596886,10.4843916],[-13.4605791,10.4814144],[-13.4610516,10.4807266],[-13.4616329,10.4801629],[-13.4619801,10.4799009],[-13.4625436,10.4797926],[-13.464596,10.4797926],[-13.4655084,10.4797263],[-13.4668084,10.4794246],[-13.467525,10.4791526],[-13.4692263,10.4783161],[-13.4696504,10.4780431],[-13.470482,10.4778685],[-13.4713778,10.4777391],[-13.4719999,10.4777811],[-13.472775,10.4780272],[-13.4734134,10.4783396],[-13.4757699,10.4801222],[-13.4774795,10.4816351],[-13.4793215,10.4829524],[-13.4804938,10.4838626],[-13.4815076,10.4843343],[-13.4820278,10.484466],[-13.483352,10.4843548],[-13.4843612,10.4841326],[-13.4851688,10.4838817],[-13.4859276,10.4834736],[-13.4877659,10.482126],[-13.4887696,10.4814015],[-13.4896039,10.4806472],[-13.4907881,10.4795992],[-13.4918862,10.4784083],[-13.4921526,10.4777176],[-13.4922661,10.4770298],[-13.4919466,10.4751448],[-13.4917974,10.4740099],[-13.4917409,10.4716201],[-13.4917717,10.4694712],[-13.4919427,10.4677456],[-13.4924955,10.4655567],[-13.4942823,10.4625699],[-13.4962942,10.4609375],[-13.497533,10.4606643],[-13.4985423,10.460577],[-13.4996484,10.4599259],[-13.5015427,10.4586705],[-13.5030606,10.4581861],[-13.5053083,10.4579966],[-13.506471,10.4574487],[-13.5070845,10.4579092],[-13.5076497,10.4580124],[-13.5085459,10.4574487],[-13.5102454,10.4562863],[-13.512541,10.4537064],[-13.514721,10.4510678],[-13.5175488,10.4458331],[-13.5176845,10.4434198],[-13.5172929,10.4425496],[-13.5170173,10.4413655],[-13.5170826,10.4401387],[-13.5172929,10.4394468],[-13.5177643,10.4389332],[-13.5181995,10.4388833],[-13.5189466,10.4384339],[-13.5191343,10.4380206],[-13.519962,10.4361799],[-13.5200273,10.4352955],[-13.5199837,10.4346678],[-13.5187362,10.4326135],[-13.5186739,10.4318817],[-13.5185394,10.4308732],[-13.5176628,10.4290255],[-13.517246,10.4283977],[-13.516865,10.4279627],[-13.5154724,10.4271781],[-13.5150144,10.4267095],[-13.5138128,10.4236706],[-13.5132966,10.4232762],[-13.5122666,10.422192],[-13.5115849,10.4208081],[-13.5112379,10.4197875],[-13.5108088,10.4181117],[-13.5099892,10.4159931],[-13.5088215,10.4139458],[-13.5075595,10.4130755],[-13.5069463,10.41219],[-13.5065006,10.410857],[-13.5058913,10.4091949],[-13.5051588,10.406798],[-13.5051298,10.4064485],[-13.5051805,10.4059776],[-13.5055795,10.4048933],[-13.505739,10.4043084],[-13.505594,10.4038376],[-13.5051805,10.4031527],[-13.5048179,10.4022111],[-13.5045858,10.401355],[-13.5042304,10.3986656],[-13.5039694,10.396066],[-13.5036915,10.3953013],[-13.5028379,10.392452],[-13.5026348,10.3911536],[-13.5028544,10.3905243],[-13.5032807,10.3894534],[-13.5038943,10.3885087],[-13.5044553,10.3876508],[-13.5054562,10.3877864],[-13.5063918,10.3878435],[-13.506943,10.3877578],[-13.5073419,10.3875438],[-13.5077553,10.3869374],[-13.5080092,10.3865379],[-13.508089,10.3859529],[-13.5081615,10.385211],[-13.5087635,10.3841123],[-13.5095976,10.3829281],[-13.5106057,10.3811517],[-13.511331,10.3780269],[-13.511962,10.3777629],[-13.512564,10.378034],[-13.5128976,10.3780911],[-13.513224,10.3777914],[-13.5134199,10.3768854],[-13.5133183,10.3756226],[-13.5133473,10.3751517],[-13.5145658,10.3731684],[-13.5152041,10.3717415],[-13.516263,10.3702433],[-13.5176846,10.3680815],[-13.5204117,10.3655131],[-13.5213183,10.3644715],[-13.5226238,10.363437],[-13.5237262,10.3627592],[-13.5257063,10.3622169],[-13.527374,10.3613667],[-13.528627,10.3599788],[-13.5296056,10.3583271],[-13.5302066,10.3573352],[-13.5312138,10.3567808],[-13.5316907,10.3566193],[-13.5322702,10.3563671],[-13.5325145,10.3562051],[-13.5329728,10.3557617],[-13.5331402,10.3556199],[-13.5333267,10.3555447],[-13.5335607,10.3554685],[-13.533937,10.3555094],[-13.5345351,10.3557107],[-13.5350858,10.355691],[-13.5354294,10.355575],[-13.536204,10.3556355],[-13.53764,10.3556255],[-13.5394278,10.355963],[-13.5409151,10.355519],[-13.5421562,10.3549943],[-13.5426734,10.3547273],[-13.544023,10.3536725],[-13.5451616,10.3528148],[-13.5459719,10.3519269],[-13.5490388,10.3484256],[-13.5524852,10.3454287],[-13.5558803,10.3426942],[-13.5579625,10.340111],[-13.5597678,10.3378709],[-13.5608345,10.3360546],[-13.5616961,10.3331585],[-13.5617577,10.3319577],[-13.5617577,10.3301212],[-13.5616243,10.3286479],[-13.5598806,10.325439],[-13.5597736,10.3252449],[-13.5582808,10.3225334],[-13.5573833,10.3208986],[-13.5571782,10.3202023],[-13.5571627,10.3198441],[-13.5571627,10.3193597],[-13.5571884,10.3187038],[-13.5573832,10.3179116],[-13.5576856,10.3172247],[-13.557942,10.3163064],[-13.5580959,10.3146111],[-13.5581779,10.3124212],[-13.5582087,10.3108974],[-13.5583933,10.3092424],[-13.5587933,10.3072443],[-13.5592857,10.3059223],[-13.5601986,10.3036213],[-13.5611628,10.3014819],[-13.5626398,10.2994837],[-13.5640655,10.2978387],[-13.5656964,10.2951643],[-13.5676407,10.2904889],[-13.7749714,10.2892924],[-13.8056529,10.2384807],[-13.8266062,10.2046017],[-13.9291301,10.1419879],[-13.9216452,10.0977849],[-13.8348335,10.0439985],[-13.7599958,9.9983099],[-13.6796592,9.9859287],[-13.6748663,9.9844153],[-13.6734822,9.9732066],[-13.6745893,9.9694162],[-13.6775886,9.9666695],[-13.6886889,9.9646196],[-13.6910755,9.9626964],[-13.6924847,9.9599738],[-13.6925386,9.9537145],[-13.6869243,9.9450247],[-13.6852826,9.9397563],[-13.6957881,9.9026287],[-13.7086648,9.8686698],[-13.7171578,9.8568583],[-13.7261087,9.8484827],[-13.7502444,9.8304854],[-13.7602573,9.8092934],[-13.7486448,9.8053766],[-13.7534641,9.7943837],[-13.7561414,9.7816315],[-13.7652444,9.7643053],[-13.7591758,9.7599956],[-13.7523568,9.7626033],[-13.7444503,9.7589402],[-13.7380246,9.7555099],[-13.7291001,9.7486494],[-13.7192831,9.7428442],[-13.7087522,9.7417008],[-13.6969718,9.741173],[-13.6803722,9.7430201],[-13.6701089,9.7468023],[-13.6606489,9.7524315],[-13.6535986,9.759292],[-13.6391714,9.7736859],[-13.6313179,9.7844156],[-13.6237165,9.7825076],[-13.6259128,9.7617656],[-13.6081265,9.7533673],[-13.5658686,9.6896349],[-13.5658496,9.6894241],[-13.5656939,9.6890806],[-13.5655179,9.6888483],[-13.56544,9.6887387],[-13.5653776,9.6886932],[-13.5651364,9.6886519],[-13.5648267,9.6886183],[-13.5645544,9.6886455],[-13.5643962,9.688701],[-13.5642808,9.68882],[-13.5642916,9.6890659],[-13.564254,9.6892219],[-13.5640636,9.6893409],[-13.5636291,9.6892457],[-13.5633072,9.6893224],[-13.5630926,9.6892721],[-13.5630256,9.6891056],[-13.5628734,9.6890272],[-13.56274,9.6890273],[-13.5625402,9.6893838],[-13.5623584,9.689574],[-13.5621117,9.6897806],[-13.5619071,9.6898485],[-13.561781,9.6897956],[-13.5616848,9.6895379],[-13.5615882,9.6895137],[-13.5614673,9.6895319],[-13.5610486,9.6898325],[-13.5603064,9.6897675],[-13.5598743,9.6892902],[-13.5593114,9.688966],[-13.5591339,9.6886594],[-13.5591293,9.6885767],[-13.5590453,9.6884868],[-13.558633,9.6883876],[-13.5584995,9.6884287],[-13.5583582,9.6883952],[-13.5581356,9.6884693],[-13.5580623,9.6885452],[-13.5579957,9.6886133],[-13.5578885,9.6886508],[-13.5577403,9.688614],[-13.557648,9.6885427],[-13.5574011,9.6881233],[-13.5572719,9.6878387],[-13.5571248,9.6877534],[-13.5568867,9.6872513],[-13.5568077,9.6871336],[-13.5567045,9.687077],[-13.5566724,9.6869638],[-13.5565483,9.6869109],[-13.5564997,9.6867849],[-13.5565471,9.6865271],[-13.5568294,9.6863927],[-13.5567284,9.6859416],[-13.5564307,9.6859109],[-13.5561669,9.686004],[-13.5561048,9.6861312],[-13.556013,9.6861275],[-13.5557446,9.6859836],[-13.5557328,9.6859102],[-13.55546,9.6858289],[-13.5550877,9.6860339],[-13.5550989,9.6861806],[-13.5548559,9.686266],[-13.5545198,9.6862875],[-13.554315,9.6864387],[-13.5542063,9.6865952],[-13.5539544,9.6866016],[-13.553866,9.6867027],[-13.5527243,9.6868456],[-13.5523741,9.6867983],[-13.5520721,9.6868739],[-13.5517894,9.6868551],[-13.5515348,9.6867243],[-13.551217,9.6866657],[-13.551026,9.6867412],[-13.55092,9.686667],[-13.5508661,9.686525],[-13.5506804,9.6863103],[-13.5506605,9.6860879],[-13.5504594,9.6858903],[-13.5499102,9.6855366],[-13.5494884,9.6848157],[-13.549376,9.6847305],[-13.5490154,9.6846276],[-13.5487287,9.6843686],[-13.548404,9.6841701],[-13.5483982,9.6839811],[-13.5482328,9.6837741],[-13.5482379,9.6836292],[-13.5482982,9.6835002],[-13.5482255,9.6831326],[-13.5482565,9.6829822],[-13.5479846,9.6827729],[-13.5475161,9.6826823],[-13.5476313,9.6825285],[-13.5476121,9.6824729],[-13.5475411,9.6824308],[-13.5474664,9.6824437],[-13.5473647,9.6823553],[-13.5469893,9.6824085],[-13.5468597,9.6825753],[-13.5466314,9.6830823],[-13.5462898,9.6832971],[-13.5459336,9.682946],[-13.5458139,9.6825888],[-13.5460313,9.6822542],[-13.546127,9.6819827],[-13.5461456,9.681752],[-13.5460015,9.6810906],[-13.5437036,9.677306],[-13.5437062,9.6770281],[-13.5415703,9.6745748],[-13.5414777,9.6744445],[-13.5414168,9.6744722],[-13.5394445,9.6755278],[-13.5391668,9.6755833],[-13.5386649,9.6758855],[-13.5385218,9.6759225],[-13.5384174,9.6760753],[-13.5381633,9.6761028],[-13.5372712,9.6764708],[-13.5368242,9.6765716],[-13.5364238,9.676765],[-13.5359276,9.6768354],[-13.5347109,9.6772607],[-13.534208,9.6773356],[-13.5339568,9.6773608],[-13.5337254,9.6773137],[-13.5333851,9.6773262],[-13.5328432,9.6772394],[-13.5320959,9.6772844],[-13.5319761,9.6772574],[-13.5301227,9.6750357],[-13.526102,9.6698946],[-13.5248329,9.6682207],[-13.5241347,9.6672083],[-13.5240754,9.6671475],[-13.5239569,9.6671478],[-13.5236403,9.6672158],[-13.5233357,9.6657719],[-13.5232587,9.6650162],[-13.5231568,9.6649268],[-13.5227765,9.6649314],[-13.522319,9.6644121],[-13.5219543,9.6639174],[-13.5218057,9.6636667],[-13.5209723,9.6627222],[-13.5208675,9.6625357],[-13.4738187,9.6496363],[-13.4829466,9.5754784],[-13.4862518,9.5511958],[-13.4901413,9.5432635],[-13.5043052,9.5143751],[-13.5215307,9.489805],[-13.5201506,9.4782307],[-13.5131958,9.4619833],[-13.5106335,9.4459157],[-13.4994692,9.4296668],[-13.480069,9.4096254],[-13.4634141,9.4015002],[-13.4434649,9.4043892],[-13.4323006,9.4067365],[-13.4249798,9.3890412],[-13.4255288,9.3827212],[-13.4236986,9.3706227],[-13.4275421,9.3581625],[-13.4260779,9.3484108],[-13.4253458,9.3283648],[-13.4176589,9.3124716],[-13.4121683,9.2951327],[-13.4127174,9.2844761],[-13.4161948,9.2799605],[-13.4290062,9.2801411],[-13.4365101,9.2790574],[-13.4465762,9.2707485],[-13.4438309,9.2629813],[-13.4312025,9.2602718],[-13.4171099,9.2609943],[-13.4081419,9.2696647],[-13.3962455,9.2745417],[-13.3834341,9.2732773],[-13.3702566,9.2707485],[-13.3536017,9.2736385],[-13.3435355,9.2794186],[-13.3265146,9.2776123],[-13.3224881,9.2633426],[-13.3168145,9.2532269],[-13.3113239,9.2407626],[-13.3111409,9.2230589],[-13.3160824,9.2089675],[-13.3149843,9.1972243],[-13.312239,9.1923463],[-13.3160824,9.1892748],[-13.3292599,9.1862034],[-13.3294429,9.1771696],[-13.3243184,9.1628958],[-13.3181633,9.1550394],[-13.3112711,9.1488461],[-13.2941199,9.1072403],[-13.2910086,9.1005539],[-13.2957671,9.0942287],[-13.2979634,9.0868191],[-13.312605,9.082301],[-13.3180957,9.0776021],[-13.3228542,9.068927],[-13.3234033,9.0633242],[-13.3173636,9.0506725],[-13.3111409,9.0419968],[-13.3066584,9.034115],[-13.3012301,9.0360758],[-13.301381,9.039148],[-13.3014551,9.039947],[-13.3019181,9.0419],[-13.3020721,9.043493],[-13.3020721,9.044881],[-13.3018151,9.046063],[-13.3014031,9.04709],[-13.3006841,9.048376],[-13.2997591,9.049249],[-13.2987311,9.0497629],[-13.2970871,9.0500199],[-13.2935921,9.0498139],[-13.2919991,9.0498659],[-13.2894801,9.0502769],[-13.2885041,9.0508939],[-13.2872191,9.052127],[-13.2862431,9.052898],[-13.2841871,9.054337],[-13.2821311,9.055519],[-13.2801271,9.056958],[-13.2779171,9.0593219],[-13.2769921,9.060812],[-13.2763241,9.061686],[-13.2752961,9.062868],[-13.2740631,9.063639],[-13.2725211,9.063948],[-13.2705171,9.063948],[-13.2691291,9.064102],[-13.2672791,9.064616],[-13.2654281,9.064975],[-13.2592611,9.065181],[-13.2561261,9.065027],[-13.2545841,9.065284],[-13.2533511,9.0659],[-13.2522201,9.067031],[-13.2513471,9.068522],[-13.2509351,9.069652],[-13.2507301,9.070834],[-13.2503701,9.0714],[-13.2498051,9.072016],[-13.2493421,9.072376],[-13.2485201,9.072222],[-13.2474411,9.071656],[-13.2460531,9.070423],[-13.2452311,9.069549],[-13.2439981,9.068933],[-13.2427641,9.068573],[-13.2415311,9.068778],[-13.2396291,9.070115],[-13.2337701,9.073147],[-13.2305841,9.074329],[-13.2278091,9.075254],[-13.2252901,9.076179],[-13.2228241,9.07659],[-13.2166051,9.078389],[-13.2133161,9.078594],[-13.2118261,9.078338],[-13.2094621,9.078903],[-13.2081251,9.079879],[-13.2068401,9.081062],[-13.2050931,9.082089],[-13.2033461,9.082552],[-13.2021641,9.083066],[-13.2016501,9.084145],[-13.2015471,9.085687],[-13.2017011,9.086766],[-13.2025751,9.088462],[-13.2029341,9.089798],[-13.2030371,9.091648],[-13.2023181,9.093242],[-13.2014961,9.094577],[-13.2003651,9.095554],[-13.1996461,9.095863],[-13.1983601,9.095863],[-13.1974351,9.095297],[-13.1963051,9.094372],[-13.1947631,9.093704],[-13.1930161,9.093293],[-13.1905491,9.093139],[-13.1885961,9.093498],[-13.1866951,9.094321],[-13.1851011,9.094783],[-13.1828911,9.094577],[-13.1805271,9.093653],[-13.1789851,9.093242],[-13.1777001,9.093036],[-13.1753881,9.091854],[-13.1726641,9.091032],[-13.1721234,9.0906209],[-13.1700951,9.089079],[-13.1683471,9.087588],[-13.1664461,9.085173],[-13.1669601,9.082192],[-13.1663941,9.07952],[-13.1655201,9.078338],[-13.1637731,9.077001],[-13.1614601,9.076179],[-13.1598671,9.075357],[-13.1577601,9.074175],[-13.1560131,9.072838],[-13.1524661,9.069446],[-13.1505651,9.067442],[-13.1490751,9.065592],[-13.1463511,9.061429],[-13.1447571,9.059425],[-13.1429071,9.057626],[-13.1410571,9.056444],[-13.1392581,9.05593],[-13.1369461,9.055365],[-13.1347361,9.054954],[-13.1335541,9.054594],[-13.1321661,9.053823],[-13.1299051,9.0519729],[-13.1281061,9.0509959],[-13.1254851,9.0500709],[-13.1237386,9.0497762],[-13.1222804,9.0495613],[-13.1205334,9.0495103],[-13.1180154,9.0499722],[-13.1179569,9.0499962],[-13.1168844,9.0504352],[-13.1158564,9.0513082],[-13.1150854,9.0520792],[-13.1143664,9.0530562],[-13.1131834,9.0533643],[-13.1120534,9.0532103],[-13.1106144,9.0526443],[-13.1088154,9.0515652],[-13.1072224,9.0510512],[-13.1056294,9.0500752],[-13.1041904,9.0487383],[-13.1026484,9.0477623],[-13.1009524,9.0471453],[-13.0994624,9.0467863],[-13.0986465,9.0467208],[-13.0968924,9.0465803],[-13.0917041,9.0465802],[-13.0898514,9.0465803],[-13.0885664,9.0470423],[-13.0861004,9.0477623],[-13.0848154,9.0480703],[-13.0830674,9.0483283],[-13.0818344,9.0486873],[-13.0807944,9.0494483],[-13.0803954,9.0505372],[-13.0802924,9.0519252],[-13.0810124,9.0556773],[-13.0811144,9.0577323],[-13.0807034,9.0592232],[-13.0799324,9.0607133],[-13.0790074,9.0617413],[-13.0770034,9.0631293],[-13.0755644,9.0645683],[-13.0742274,9.0670863],[-13.0738684,9.0687823],[-13.0739714,9.0702213],[-13.0746904,9.0728423],[-13.0753584,9.0748463],[-13.0751534,9.0761823],[-13.0743304,9.0777763],[-13.0740744,9.0789063],[-13.0738613,9.0794924],[-13.0736634,9.0800373],[-13.0726864,9.0811683],[-13.0712474,9.0825043],[-13.0703911,9.0829881],[-13.0700654,9.0831723],[-13.0686264,9.0835833],[-13.0664674,9.0837373],[-13.0634874,9.0834293],[-13.0611744,9.0834293],[-13.0555816,9.0825336],[-13.0489434,9.0830693],[-13.0467844,9.0833263],[-13.0446774,9.0839943],[-13.0431354,9.0850223],[-13.0424164,9.0857933],[-13.0419534,9.0872323],[-13.0417474,9.0899043],[-13.0422104,9.0923203],[-13.0419024,9.0944783],[-13.0412334,9.0962773],[-13.0404624,9.0973053],[-13.0379964,9.0986933],[-13.0355294,9.0996183],[-13.0331134,9.1008513],[-13.0299274,9.1019303],[-13.0284374,9.1017763],[-13.0266384,9.1011083],[-13.0257134,9.1002343],[-13.0253024,9.0987443],[-13.0250964,9.0975623],[-13.0245824,9.0967403],[-13.0239144,9.0962263],[-13.0227834,9.0963283],[-13.0218074,9.0968943],[-13.0193914,9.0998753],[-13.0184154,9.1014683],[-13.0170274,9.1030613],[-13.0151264,9.1047063],[-13.0125054,9.1062993],[-13.0107064,9.1071723],[-13.0082904,9.1084573],[-13.0069034,9.1095883],[-13.0053614,9.1113353],[-13.0012504,9.1163723],[-13.0001454,9.1186853],[-12.9967274,9.1271643],[-12.9960074,9.1291693],[-12.9955454,9.1302483],[-12.9949284,9.1314813],[-12.9943124,9.1336403],[-12.9937974,9.1363643],[-12.9937464,9.1396533],[-12.9933614,9.1412203],[-12.9925644,9.1440213],[-12.9920504,9.1445093],[-12.9898154,9.1470283],[-12.9882474,9.1485183],[-12.9862944,9.1505223],[-12.9848044,9.1529383],[-12.9822084,9.1576153],[-12.9812064,9.1608013],[-12.9810014,9.1617523],[-12.9807704,9.1656843],[-12.9802304,9.1675853],[-12.9797674,9.1684593],[-12.9792274,9.1691523],[-12.9781484,9.1698463],[-12.9728554,9.1717993],[-12.9641954,9.1745233],[-12.9588764,9.1763223],[-12.9552274,9.1779413],[-12.9526584,9.1791483],[-12.9517584,9.1797653],[-12.9509874,9.1805883],[-12.9502164,9.1834143],[-12.9501144,9.1848023],[-12.9502164,9.1857013],[-12.9518104,9.1935643],[-12.9520674,9.1946693],[-12.9524784,9.1955683],[-12.9530174,9.1961343],[-12.9543024,9.1968533],[-12.9554074,9.1972643],[-12.9564094,9.1978303],[-12.9573344,9.1985753],[-12.9583364,9.1995003],[-12.9593134,9.2007343],[-12.9598784,9.2016073],[-12.9605724,9.2028153],[-12.9612664,9.2042023],[-12.9616264,9.2052823],[-12.9626794,9.2108063],[-12.9639134,9.2151753],[-12.9644784,9.2170003],[-12.9648634,9.2177963],[-12.9659424,9.2196203],[-12.9666831,9.2206872],[-12.9681014,9.2227303],[-12.9712884,9.2270213],[-12.9699774,9.2277923],[-12.9694374,9.2280233],[-12.9680504,9.2282803],[-12.9667654,9.2288463],[-12.9659944,9.2295653],[-12.9644014,9.2319553],[-12.9635534,9.2330083],[-12.9626224,9.2340633],[-12.9621454,9.2349053],[-12.9622394,9.2350583],[-12.9622224,9.2353733],[-12.9620944,9.2356203],[-12.9620014,9.2359773],[-12.9612274,9.2363353],[-12.9605124,9.2369643],[-12.9601894,9.2370493],[-12.9600874,9.2372283],[-12.9596024,9.2387193],[-12.9593824,9.2389743],[-12.9589724,9.2392613],[-12.9587604,9.2395933],[-12.9587774,9.2402233],[-12.9585044,9.2405803],[-12.9585384,9.2408523],[-12.9579434,9.2415763],[-12.9577224,9.2422653],[-12.9576794,9.2425793],[-12.9578414,9.2430303],[-12.9577304,9.2434903],[-12.9575514,9.2438643],[-12.9573814,9.2440683],[-12.9571524,9.2441793],[-12.9569734,9.2443753],[-12.9567094,9.2445283],[-12.9565304,9.2444993],[-12.9563694,9.2446473],[-12.9563434,9.2450213],[-12.9564624,9.2455323],[-12.9563174,9.2461443],[-12.9557224,9.2470293],[-12.9554674,9.2476933],[-12.9551614,9.2481523],[-12.9551124,9.2485313],[-12.9548374,9.2487993],[-12.9548824,9.2501263],[-12.9547684,9.2505993],[-12.9546554,9.2508083],[-12.9544464,9.2510543],[-12.9542954,9.2513573],[-12.9540114,9.2516793],[-12.9538594,9.2521153],[-12.9539354,9.2529293],[-12.9532564,9.2537943],[-12.9529304,9.2546143],[-12.9526704,9.2549523],[-12.9518324,9.2558093],[-12.9513994,9.2563873],[-12.9511834,9.2568323],[-12.9511964,9.2576433],[-12.9513454,9.2581433],[-12.9515294,9.2590303],[-12.9515774,9.2594833],[-12.9514984,9.2598873],[-12.9512904,9.2602123],[-12.9506004,9.2606163],[-12.9503824,9.2611173],[-12.9500944,9.2620073],[-12.9500924,9.2628683],[-12.9498834,9.2630903],[-12.9497404,9.2634162],[-12.9498834,9.2639233],[-12.9493504,9.2653203],[-12.9497294,9.2666083],[-12.9501654,9.2675943],[-12.9511504,9.2690154],[-12.9514534,9.2698104],[-12.9519464,9.2707013],[-12.9522114,9.2710424],[-12.9524194,9.2716104],[-12.9525714,9.2718764],[-12.9531964,9.2721414],[-12.9533664,9.2724254],[-12.9534424,9.2729184],[-12.9533104,9.2735054],[-12.9535374,9.2738464],[-12.9536514,9.2742634],[-12.9536704,9.2745284],[-12.9532154,9.2754374],[-12.9530444,9.2759114],[-12.9530444,9.2762524],[-12.9535374,9.2769914],[-12.9537834,9.2771424],[-12.9539924,9.2774644],[-12.9540114,9.2782034],[-12.9542384,9.2784314],[-12.9544464,9.2787344],[-12.9545224,9.2791124],[-12.9541414,9.2798654],[-12.9543174,9.2804054],[-12.9545474,9.2808104],[-12.9539794,9.2814044],[-12.9539854,9.2817604],[-12.9536984,9.2820474],[-12.9530864,9.2825164],[-12.9525534,9.2825814],[-12.9521104,9.2828414],[-12.9519284,9.2834924],[-12.9516314,9.2835354],[-12.9514854,9.2837784],[-12.9512644,9.2839874],[-12.9500084,9.2837824],[-12.9496844,9.2839304],[-12.9495584,9.2842604],[-12.9487904,9.2850024],[-12.9485954,9.2852634],[-12.9486734,9.2855754],[-12.9485544,9.2858764],[-12.9483654,9.2860664],[-12.9481004,9.2862264],[-12.9476444,9.2862134],[-12.9473714,9.2863304],[-12.9471884,9.2866174],[-12.9470974,9.2871904],[-12.9466034,9.2874764],[-12.9460734,9.2877144],[-12.9449544,9.2884724],[-12.9445944,9.2889274],[-12.9445194,9.2891924],[-12.9443104,9.2893824],[-12.9438374,9.2896094],[-12.9431364,9.2896854],[-12.9428524,9.2897604],[-12.9426434,9.2901014],[-12.9423784,9.2904044],[-12.9419994,9.2906514],[-12.9413934,9.2906894],[-12.9410524,9.2906134],[-12.9404084,9.2903094],[-12.9391764,9.2899884],[-12.9383434,9.2901204],[-12.9380394,9.2900824],[-12.9377744,9.2899884],[-12.9369034,9.2899694],[-12.9365054,9.2897604],[-12.9362404,9.2894954],[-12.9358234,9.2891924],[-12.9354734,9.2892124],[-12.9349734,9.2891444],[-12.9345414,9.2888884],[-12.9341904,9.2883884],[-12.9335544,9.2881994],[-12.9327914,9.2882824],[-12.9320534,9.2885674],[-12.9315414,9.2885674],[-12.9310294,9.2883964],[-12.9294194,9.2871274],[-12.9287464,9.2868344],[-12.9284154,9.2867674],[-12.9277334,9.2867864],[-12.9274114,9.2867294],[-12.9271904,9.2863444],[-12.9273734,9.2859794],[-12.9274504,9.2856544],[-12.9274254,9.2854974],[-12.9272294,9.2852504],[-12.9269554,9.2850424],[-12.9264094,9.2848494],[-12.9262744,9.2846194],[-12.9262334,9.2840654],[-12.9254784,9.2834324],[-12.9249104,9.2831674],[-12.9244554,9.2830914],[-12.9239254,9.2831484],[-12.9238834,9.2835054],[-12.9237274,9.2838054],[-12.9232974,9.2838444],[-12.9227114,9.2835054],[-12.9224124,9.2834404],[-12.9215374,9.2834704],[-12.9210454,9.2832814],[-12.9207614,9.2829974],[-12.9206854,9.2827124],[-12.9205714,9.2817654],[-12.9203824,9.2811214],[-12.9200794,9.2806474],[-12.9187794,9.2798344],[-12.9180704,9.2793214],[-12.9171994,9.2788664],[-12.9164414,9.2782984],[-12.9160434,9.2778444],[-12.9157214,9.2772754],[-12.9157325,9.2768554],[-12.9157404,9.2765584],[-12.9152324,9.2751864],[-12.9148284,9.2748974],[-12.9143784,9.2748284],[-12.9138604,9.2746784],[-12.9135714,9.2744694],[-12.9133244,9.2742824],[-12.9132774,9.2741494],[-12.9132584,9.2737134],[-12.9133724,9.2735054],[-12.9136564,9.2733154],[-12.9140164,9.2732584],[-12.9146794,9.2733344],[-12.9150704,9.2730174],[-12.9152904,9.2726374],[-12.9151174,9.2720603],[-12.9146334,9.2713684],[-12.9143904,9.2709424],[-12.9143094,9.2705034],[-12.9143654,9.2700164],[-12.9144484,9.2697073],[-12.9148054,9.2695264],[-12.9151914,9.2695264],[-12.9159484,9.2695644],[-12.9165744,9.2696974],[-12.9173214,9.2697824],[-12.9176314,9.2687393],[-12.9173474,9.2683503],[-12.9168014,9.2682573],[-12.9155514,9.2685983],[-12.9150394,9.2686553],[-12.9146984,9.2684653],[-12.9145614,9.2680503],[-12.9142404,9.2677313],[-12.9139214,9.2671773],[-12.9138184,9.2665143],[-12.9134864,9.2660403],[-12.9133534,9.2655103],[-12.9130314,9.2651693],[-12.9125094,9.2650113],[-12.9118944,9.2650553],[-12.9115274,9.2652123],[-12.9109654,9.2652443],[-12.9105244,9.2651733],[-12.9101134,9.2654133],[-12.9091184,9.2663193],[-12.9086934,9.2664093],[-12.9084744,9.2663753],[-12.9081514,9.2660174],[-12.9082324,9.2653483],[-12.9084044,9.2650143],[-12.9094704,9.2639752],[-12.9096164,9.2636302],[-12.9096134,9.2632982],[-12.9093624,9.2631343],[-12.9084624,9.2629603],[-12.9079434,9.2627883],[-12.9072704,9.2620223],[-12.9068601,9.2617791],[-12.9052205,9.2641444],[-12.9038885,9.2658008],[-12.9031554,9.266509],[-12.9017979,9.2676834],[-12.8999949,9.2690379],[-12.8992336,9.2700725],[-12.8987658,9.2710515],[-12.896345,9.2729358],[-12.8955526,9.2732436],[-12.8945731,9.2731267],[-12.8937682,9.2727326],[-12.8927638,9.2721906],[-12.8900062,9.27123],[-12.8887331,9.2708412],[-12.8877039,9.2708299],[-12.886506,9.2710762],[-12.8855514,9.271655],[-12.884777,9.2722694],[-12.8841975,9.273336],[-12.8838598,9.2743889],[-12.883631,9.2763611],[-12.8839613,9.2779104],[-12.8844417,9.2789449],[-12.8849342,9.2797175],[-12.8855585,9.2804226],[-12.8868749,9.2813894],[-12.8874365,9.2817773],[-12.8877761,9.2823939],[-12.8879418,9.2830272],[-12.8877422,9.2837415],[-12.8872992,9.2846096],[-12.8866815,9.2854963],[-12.8865692,9.2865554],[-12.8864257,9.2876883],[-12.8859017,9.2885996],[-12.8853698,9.28921],[-12.8850095,9.2893384],[-12.8844729,9.2891106],[-12.8842331,9.2892388],[-12.8833187,9.2897202],[-12.8823143,9.290299],[-12.8816716,9.2910932],[-12.8813596,9.2924355],[-12.8806359,9.2930266],[-12.8796128,9.2935376],[-12.8769237,9.2935007],[-12.8743268,9.2927914],[-12.8739414,9.2926449],[-12.8732105,9.290498],[-12.8717369,9.2895706],[-12.8681102,9.2887141],[-12.8673755,9.2890582],[-12.8669509,9.2895243],[-12.8655845,9.2911867],[-12.8643679,9.2923504],[-12.863744,9.2931386],[-12.8633946,9.2933664],[-12.862883,9.2930955],[-12.8624587,9.2922827],[-12.8620345,9.2917717],[-12.8611751,9.2931119],[-12.8601734,9.2940683],[-12.8582244,9.293709],[-12.8560331,9.2916047],[-12.8544052,9.2880519],[-12.8521371,9.2863201],[-12.8495546,9.2833749],[-12.8484905,9.2812917],[-12.8478396,9.2810715],[-12.8471495,9.2810615],[-12.8453939,9.282093],[-12.8450958,9.2828425],[-12.8450895,9.2837355],[-12.8452335,9.2847182],[-12.8448561,9.2867199],[-12.8433939,9.2886861],[-12.8396807,9.2903373],[-12.8375415,9.2905822],[-12.8350739,9.2898487],[-12.8339302,9.2896561],[-12.8330643,9.2898546],[-12.8293331,9.2922245],[-12.824754,9.2952053],[-12.8240766,9.2954346],[-12.8233122,9.2953727],[-12.8197187,9.2939701],[-12.816247,9.2922809],[-12.813722,9.2909534],[-12.8110303,9.2894312],[-12.8087414,9.2895327],[-12.807216,9.2898904],[-12.8061877,9.2907387],[-12.8055296,9.2916758],[-12.805171,9.2944339],[-12.8045947,9.2953133],[-12.8030844,9.2964065],[-12.8018172,9.2978074],[-12.8005333,9.2990169],[-12.7988469,9.2995518],[-12.7957106,9.2995407],[-12.7901751,9.3003094],[-12.7879401,9.3014528],[-12.785498,9.3035428],[-12.7846895,9.3053617],[-12.7842805,9.3075639],[-12.7843392,9.3096506],[-12.7858161,9.3118126],[-12.7866848,9.3130204],[-12.7871364,9.3142697],[-12.7868316,9.3160897],[-12.7856869,9.317088],[-12.7820582,9.3184088],[-12.7784223,9.3209139],[-12.7776404,9.3219571],[-12.7775928,9.3225332],[-12.7782908,9.3245131],[-12.7781531,9.3264695],[-12.7776051,9.3271858],[-12.7759275,9.3293789],[-12.7749739,9.3308415],[-12.7721045,9.3352424],[-12.7720427,9.3361471],[-12.7718578,9.3388522],[-12.7734562,9.3417364],[-12.7749263,9.3437111],[-12.7748279,9.3446349],[-12.7743386,9.3451517],[-12.7735149,9.3457262],[-12.772341,9.3460381],[-12.7713953,9.34593],[-12.7693486,9.3450404],[-12.7686555,9.3446349],[-12.7680269,9.3444855],[-12.7667574,9.3439525],[-12.7635258,9.3434161],[-12.7606403,9.3435632],[-12.7589495,9.3439112],[-12.7567274,9.3446705],[-12.7539465,9.3449486],[-12.7530848,9.3455295],[-12.7520853,9.3460183],[-12.7512528,9.3459737],[-12.7500234,9.3451069],[-12.7493293,9.344689],[-12.7485727,9.3446785],[-12.7480551,9.3449191],[-12.7478325,9.3450225],[-12.7477518,9.3452136],[-12.7475417,9.3456538],[-12.7469108,9.3471587],[-12.7465469,9.3480267],[-12.7462868,9.3486469],[-12.7459789,9.3499282],[-12.7460059,9.350892],[-12.7460788,9.3519622],[-12.7462887,9.353489],[-12.7472171,9.3562564],[-12.7474437,9.3572326],[-12.7474818,9.3575372],[-12.7477383,9.3588198],[-12.7478641,9.3594493],[-12.7483032,9.3597092],[-12.7488099,9.3600587],[-12.7489569,9.3602261],[-12.7492247,9.3605013],[-12.7494492,9.3609415],[-12.7497217,9.3614763],[-12.7500169,9.362062],[-12.7515045,9.3630089],[-12.7525825,9.3632739],[-12.7532741,9.3637088],[-12.753431,9.3639158],[-12.753521,9.3643015],[-12.7535953,9.3650984],[-12.7537122,9.3655277],[-12.7539889,9.3672333],[-12.7536033,9.3689893],[-12.753543,9.370885],[-12.7532973,9.371886],[-12.7530388,9.3730883],[-12.7530724,9.3738143],[-12.753329,9.3746086],[-12.7536876,9.3757185],[-12.7544127,9.3767578],[-12.7554054,9.3789204],[-12.7560142,9.3814686],[-12.7553771,9.3877023],[-12.7552752,9.3886992],[-12.7553504,9.3917864],[-12.7553592,9.3921483],[-12.7551823,9.3935385],[-12.7549937,9.3941835],[-12.7547811,9.3946655],[-12.7543675,9.3952843],[-12.7542947,9.3953932],[-12.7540647,9.3958162],[-12.7537432,9.3962983],[-12.751271,9.3982828],[-12.7488585,9.3999098],[-12.7467947,9.4005527],[-12.7467932,9.4005525],[-12.742687,9.4003275],[-12.7405739,9.4000048],[-12.7385702,9.3995761],[-12.7364899,9.3991644],[-12.7360459,9.3989784],[-12.7350738,9.3984733],[-12.7340805,9.3978349],[-12.7337319,9.3974819],[-12.7333424,9.396687],[-12.7328476,9.3959326],[-12.7324188,9.3955194],[-12.7319282,9.3952788],[-12.731293,9.3952198],[-12.7296084,9.3948423],[-12.7278287,9.3948108],[-12.7261919,9.3948428],[-12.7244634,9.39497],[-12.7223745,9.3959768],[-12.720794,9.3967075],[-12.7199329,9.3969747],[-12.7195184,9.3969935],[-12.719083,9.3969788],[-12.7185935,9.3968413],[-12.7185258,9.3968324],[-12.7180235,9.3965821],[-12.715298,9.3949666],[-12.7138633,9.3939983],[-12.7133513,9.393371],[-12.7103382,9.3896795],[-12.7082136,9.389234],[-12.7079036,9.389169],[-12.7072228,9.3890263],[-12.7066766,9.3897403],[-12.7059552,9.3906834],[-12.7056651,9.3910626],[-12.7056817,9.3913487],[-12.7058938,9.3950053],[-12.70596,9.3951521],[-12.7080877,9.3998717],[-12.7080897,9.3998761],[-12.7080905,9.3999133],[-12.7081426,9.4024343],[-12.7077889,9.4040146],[-12.7074012,9.4057469],[-12.7069375,9.4078186],[-12.7047071,9.4107045],[-12.7039126,9.4117325],[-12.6994247,9.4148073],[-12.6972678,9.4169453],[-12.6949557,9.4177878],[-12.6924392,9.4169988],[-12.6913759,9.4158926],[-12.6880043,9.4123848],[-12.6874723,9.4114752],[-12.6854142,9.4079562],[-12.6853759,9.4078906],[-12.6851982,9.4078771],[-12.6843707,9.4078144],[-12.6843633,9.4078138],[-12.6831172,9.4084285],[-12.6830409,9.4087954],[-12.6825256,9.4112737],[-12.6824941,9.4114251],[-12.682572,9.4116663],[-12.6841771,9.4167664],[-12.6841375,9.4169755],[-12.6836004,9.4180693],[-12.6834233,9.4185342],[-12.6830461,9.4188589],[-12.6826533,9.4191815],[-12.6812937,9.4194542],[-12.679155,9.4198871],[-12.6791391,9.4198903],[-12.6791034,9.4200353],[-12.6787021,9.4216641],[-12.6786739,9.4217785],[-12.6787317,9.4224981],[-12.6788106,9.42348],[-12.6788203,9.4236003],[-12.6791597,9.423996],[-12.6809405,9.4260727],[-12.6819323,9.4273128],[-12.6826666,9.4282312],[-12.6833228,9.4290789],[-12.6834202,9.4297164],[-12.6833632,9.4303063],[-12.6832553,9.4306218],[-12.682694,9.4315062],[-12.6816638,9.4324052],[-12.6794654,9.4337631],[-12.6780244,9.4343137],[-12.677656,9.4345656],[-12.6773742,9.4346936],[-12.6772473,9.4347513],[-12.6757762,9.4354197],[-12.6749886,9.4357775],[-12.6748367,9.4358465],[-12.6748229,9.4360152],[-12.6747829,9.4365027],[-12.6746727,9.4378462],[-12.6746595,9.4380075],[-12.674687,9.4380615],[-12.6748763,9.4384341],[-12.6753106,9.4392888],[-12.6754537,9.4395703],[-12.6755513,9.4396085],[-12.6790456,9.4413977],[-12.6804492,9.4421249],[-12.6806048,9.442326],[-12.6809118,9.4427228],[-12.6809118,9.4429878],[-12.6810244,9.4440935],[-12.6809118,9.4444131],[-12.680409,9.4451511],[-12.6800758,9.4458904],[-12.6790842,9.4468338],[-12.6787827,9.4469907],[-12.6786105,9.447047],[-12.6778102,9.4482658],[-12.6774384,9.448832],[-12.6772945,9.4493314],[-12.6770673,9.4501197],[-12.6769853,9.4506534],[-12.6768576,9.4521241],[-12.6770527,9.4532648],[-12.6777378,9.4567475],[-12.6778931,9.4581041],[-12.6775271,9.459607],[-12.6773453,9.4598996],[-12.6766032,9.4615656],[-12.6760397,9.4623415],[-12.6756901,9.4626399],[-12.6752009,9.4632125],[-12.672621,9.4654221],[-12.6713149,9.4664735],[-12.6695882,9.4675876],[-12.6675512,9.4684378],[-12.6674193,9.4684983],[-12.6670013,9.4701565],[-12.6669928,9.4702541],[-12.6670115,9.4704447],[-12.667271,9.4714982],[-12.6689731,9.4743211],[-12.6692298,9.4744768],[-12.6700442,9.4759167],[-12.670027,9.4759997],[-12.6694524,9.4774491],[-12.6664902,9.4790699],[-12.6649719,9.4822601],[-12.6647677,9.4827251],[-12.6643173,9.483666],[-12.6640101,9.4842583],[-12.6623236,9.4872425],[-12.6614306,9.4883595],[-12.6610581,9.4889407],[-12.6571898,9.4947121],[-12.6557304,9.4966665],[-12.6539903,9.4989469],[-12.6457902,9.5114183],[-12.6446247,9.513992],[-12.6447569,9.5213273],[-12.6448564,9.5215815],[-12.6451859,9.5220365],[-12.6468787,9.5242308],[-12.6480815,9.5267116],[-12.6487142,9.5274652],[-12.650095,9.5278561],[-12.6519533,9.5295207],[-12.6528579,9.5305782],[-12.6546308,9.5326507],[-12.6549878,9.5334657],[-12.6550243,9.5339883],[-12.6554341,9.5353811],[-12.6554179,9.5355513],[-12.6551658,9.5361935],[-12.6545383,9.5385235],[-12.6539517,9.5399071],[-12.6528013,9.5407628],[-12.6513795,9.5411944],[-12.6512808,9.5412362],[-12.6488936,9.5447411],[-12.6467281,9.5463009],[-12.6449478,9.54724],[-12.6448911,9.5472936],[-12.6446961,9.5473727],[-12.6409669,9.5493398],[-12.6385363,9.5500615],[-12.6359669,9.549823],[-12.635479,9.5497012],[-12.6334239,9.5475128],[-12.632419,9.5470419],[-12.6315372,9.5470663],[-12.6305202,9.547087],[-12.629715,9.5476346],[-12.6290473,9.5483031],[-12.6286296,9.5491654],[-12.6284206,9.5498888],[-12.6282614,9.550734],[-12.6281561,9.5512843],[-12.6284189,9.5527559],[-12.6306999,9.5567956],[-12.6330621,9.5612306],[-12.6336592,9.5638061],[-12.6337009,9.5662313],[-12.6330733,9.5674154],[-12.6322703,9.5684709],[-12.6275532,9.5703501],[-12.62712,9.5707639],[-12.6268539,9.5711272],[-12.6263695,9.572032],[-12.6260851,9.5730987],[-12.6238186,9.5841181],[-12.6228155,9.5897701],[-12.6172566,9.5948659],[-12.6168557,9.5979483],[-12.6173865,9.600996],[-12.6173186,9.6038915],[-12.6163536,9.6049103],[-12.615513,9.6057978],[-12.6137765,9.607007],[-12.6130364,9.6072643],[-12.612243,9.6074935],[-12.6102747,9.6073889],[-12.6089722,9.6068371],[-12.6054863,9.6046724],[-12.604177,9.6038595],[-12.6004007,9.6021058],[-12.5977227,9.6001393],[-12.5973237,9.5999432],[-12.5970514,9.5998211],[-12.5964505,9.5997413],[-12.59352,9.5995996],[-12.5927685,9.5995634],[-12.5914884,9.5997313],[-12.5881986,9.6008817],[-12.5876664,9.6017014],[-12.5874648,9.6034215],[-12.5875638,9.6059754],[-12.5873601,9.6106158],[-12.5871706,9.6126661],[-12.5868631,9.6141618],[-12.5855257,9.6192531],[-12.5839243,9.6239061],[-12.5832226,9.6262819],[-12.5833486,9.6290363],[-12.5831314,9.6303408],[-12.5815051,9.6331583],[-12.5811948,9.6357443],[-12.5812306,9.6362929],[-12.5832905,9.6394322],[-12.5840761,9.6408548],[-12.5844549,9.6418577],[-12.5844579,9.645159],[-12.5845593,9.6466087],[-12.5849722,9.6481797],[-12.5855444,9.6490438],[-12.5865699,9.651556],[-12.5869855,9.6528207],[-12.5872032,9.654264],[-12.5871599,9.656142],[-12.5869497,9.6571989],[-12.5869352,9.6587128],[-12.5866745,9.6599696],[-12.5862253,9.6615978],[-12.585769,9.662419],[-12.585233,9.6629402],[-12.5846607,9.6633973],[-12.5839131,9.6636869],[-12.5830599,9.66394],[-12.5819927,9.6641762],[-12.5812272,9.6641542],[-12.5805029,9.6639471],[-12.579496,9.6631688],[-12.5779386,9.6612336],[-12.5768086,9.6603624],[-12.5741791,9.6572489],[-12.5736909,9.6568118],[-12.5731692,9.6567099],[-12.5726507,9.6568133],[-12.5721944,9.6570632],[-12.5717598,9.6575346],[-12.5711848,9.6584884],[-12.5710282,9.6593198],[-12.5709597,9.6603051],[-12.5709267,9.662119],[-12.5710861,9.6641828],[-12.5713179,9.6657323],[-12.5717235,9.6672033],[-12.5717887,9.6684387],[-12.5716686,9.6695505],[-12.5713275,9.6703194],[-12.5706515,9.6712021],[-12.5695794,9.6722233],[-12.5686086,9.6735048],[-12.5676236,9.6748439],[-12.5665418,9.6767714],[-12.5658819,9.6779368],[-12.5656171,9.678864],[-12.565371,9.6815702],[-12.5648711,9.6846835],[-12.5647117,9.6868828],[-12.5647238,9.6875592],[-12.5647528,9.6885798],[-12.5655364,9.692663],[-12.5655672,9.6938265],[-12.5650525,9.6985468],[-12.5646931,9.7012638],[-12.5645265,9.7024419],[-12.5643237,9.7030416],[-12.5641427,9.7033844],[-12.5637251,9.7039665],[-12.5628261,9.7044841],[-12.5618914,9.7049271],[-12.5612783,9.7051179],[-12.559864,9.705273],[-12.558536,9.7054121],[-12.5555516,9.7052836],[-12.5538971,9.7053473],[-12.5504231,9.7062832],[-12.5496208,9.706587],[-12.5483417,9.7070472],[-12.5471951,9.7077687],[-12.546357,9.7086465],[-12.5451285,9.7100645],[-12.5442136,9.7108505],[-12.542373,9.7118595],[-12.5412724,9.7123686],[-12.539761,9.7137195],[-12.5360356,9.7147282],[-12.5356558,9.714831],[-12.5347769,9.7152211],[-12.534333,9.7157621],[-12.53461,9.7183402],[-12.5344593,9.7190782],[-12.5341416,9.7199322],[-12.533691,9.7204715],[-12.5331056,9.7211111],[-12.5324617,9.7214812],[-12.5316909,9.7217182],[-12.5312529,9.7216731],[-12.530527,9.7215094],[-12.5297204,9.7207412],[-12.5289217,9.7198283],[-12.5281338,9.7179558],[-12.528067,9.7174323],[-12.5282515,9.7168567],[-12.5293578,9.7152615],[-12.5297573,9.7143426],[-12.5298393,9.7126463],[-12.5293447,9.7104381],[-12.5288968,9.7094959],[-12.5278623,9.7085266],[-12.5259194,9.7078634],[-12.5230987,9.7070524],[-12.5219616,9.706598],[-12.5203178,9.7057163],[-12.5193698,9.7058407],[-12.5186098,9.7065668],[-12.5178639,9.7080015],[-12.5171776,9.7102128],[-12.5169112,9.7114447],[-12.5166756,9.7135449],[-12.5169879,9.7151565],[-12.5173708,9.7164421],[-12.5181303,9.7178463],[-12.5188846,9.7188923],[-12.520804,9.7213601],[-12.522064,9.7235511],[-12.5225289,9.7248859],[-12.523101,9.728817],[-12.523365,9.7294981],[-12.525932,9.7338083],[-12.5262015,9.736044],[-12.5260934,9.7370966],[-12.5256016,9.7383385],[-12.5248179,9.7393338],[-12.5233264,9.7417602],[-12.5224216,9.7425031],[-12.5217636,9.7428555],[-12.5210647,9.7430748],[-12.5202927,9.7432045],[-12.5194932,9.7431892],[-12.5182923,9.7430103],[-12.5142628,9.7414544],[-12.5131935,9.7411721],[-12.5104108,9.7409878],[-12.5095518,9.7411311],[-12.5088136,9.7413916],[-12.5070203,9.7421556],[-12.5063134,9.7428467],[-12.5049098,9.7448182],[-12.5046301,9.7456271],[-12.5041096,9.7478739],[-12.504239,9.7486209],[-12.5045112,9.7497734],[-12.5052504,9.751267],[-12.5056984,9.7520574],[-12.5059188,9.7524393],[-12.5064999,9.7532405],[-12.5073002,9.754156],[-12.5080757,9.7545103],[-12.5087825,9.7546551],[-12.5097783,9.7544884],[-12.5110876,9.7542208],[-12.5118206,9.7540694],[-12.5128149,9.7537947],[-12.5145673,9.7531757],[-12.5150592,9.7530836],[-12.5154367,9.7533289],[-12.5158097,9.7541347],[-12.5157698,9.7550668],[-12.5156426,9.7566175],[-12.5153869,9.7573422],[-12.5147461,9.7585934],[-12.5141856,9.7593771],[-12.5102621,9.7641375],[-12.5090671,9.7659719],[-12.5086214,9.7678547],[-12.5080222,9.7704593],[-12.5073563,9.7723422],[-12.5071156,9.7730236],[-12.5067893,9.7746609],[-12.5066239,9.7760017],[-12.506629,9.7772283],[-12.5066395,9.7788896],[-12.506629,9.7802619],[-12.506506,9.7811049],[-12.5063781,9.7815288],[-12.5044654,9.7855794],[-12.5028775,9.787659],[-12.5006341,9.7913437],[-12.4992306,9.7931304],[-12.4986057,9.794786],[-12.4981345,9.7968655],[-12.497653,9.7995911],[-12.4977965,9.8021652],[-12.4976787,9.8039308],[-12.4975506,9.8051632],[-12.4968335,9.8088569],[-12.4966696,9.809942],[-12.4966389,9.8108404],[-12.4960191,9.8120517],[-12.4954301,9.8126725],[-12.4945645,9.8132025],[-12.4934376,9.813369],[-12.4925976,9.8132479],[-12.4919727,9.8129855],[-12.49144,9.8125464],[-12.4909585,9.8120921],[-12.490528,9.811885],[-12.490134,9.8118741],[-12.4898419,9.8119155],[-12.4894476,9.8121224],[-12.4888636,9.8126372],[-12.4885512,9.8129804],[-12.4883104,9.8135558],[-12.4880697,9.8144087],[-12.4879059,9.8158371],[-12.4879365,9.8165134],[-12.4882183,9.817982],[-12.4882029,9.8188653],[-12.488167,9.8193902],[-12.4880592,9.820031],[-12.4875114,9.8214897],[-12.4865126,9.823675],[-12.4862002,9.8246491],[-12.4861438,9.8253607],[-12.4861336,9.8270968],[-12.4863794,9.8281264],[-12.4865229,9.82851],[-12.486907,9.8292973],[-12.4873782,9.830019],[-12.4878648,9.8303773],[-12.4883156,9.8306095],[-12.4891197,9.8308063],[-12.4898522,9.8308163],[-12.4906717,9.8306852],[-12.492321,9.8300997],[-12.4934685,9.8299921],[-12.4942418,9.8300896],[-12.495252,9.8304405],[-12.4960037,9.8308164],[-12.4965108,9.8311747],[-12.4969821,9.8316239],[-12.4971869,9.8319267],[-12.4974021,9.8324162],[-12.4974789,9.8332843],[-12.4975045,9.8340413],[-12.4972933,9.8352538],[-12.4967874,9.8364637],[-12.4960806,9.8377657],[-12.4957015,9.8387701],[-12.4954762,9.8397189],[-12.494923,9.8409402],[-12.4941929,9.8423703],[-12.4940881,9.8426913],[-12.4940634,9.8431185],[-12.4941701,9.8434483],[-12.4943422,9.8438294],[-12.4946567,9.8443113],[-12.4949076,9.8446393],[-12.4956555,9.8453469],[-12.4923262,9.8469651],[-12.488485,9.8481646],[-12.486726,9.848304],[-12.481197,9.848611],[-12.474815,9.849054],[-12.471198,9.849908],[-12.469389,9.850932],[-12.463519,9.854686],[-12.458843,9.862535],[-12.45584,9.865846],[-12.4492264,9.8715577],[-12.4452138,9.8730587],[-12.4436474,9.8743059],[-12.4418128,9.8761345],[-12.4407506,9.8774346],[-12.4388623,9.8793794],[-12.4377036,9.8801616],[-12.4353004,9.880838],[-12.418095,9.884104],[-12.39045,9.887756],[-12.350453,9.892534],[-12.345401,9.893524],[-12.339327,9.903625],[-12.32147,9.9081],[-12.222482,9.932905],[-12.222597,9.932383],[-12.222858,9.931729],[-12.222858,9.930913],[-12.22276,9.930129],[-12.222891,9.929183],[-12.22294,9.928334],[-12.223103,9.926962],[-12.223332,9.926244],[-12.223511,9.925248],[-12.223492,9.924731],[-12.223329,9.923684],[-12.223213,9.923241],[-12.222912,9.922686],[-12.222015,9.922071],[-12.22199,9.921469],[-12.221607,9.92089],[-12.221537,9.920494],[-12.221657,9.920022],[-12.221793,9.919097],[-12.221631,9.918344],[-12.221413,9.917921],[-12.220798,9.917166],[-12.220529,9.916576],[-12.220209,9.916461],[-12.219954,9.916118],[-12.219907,9.915838],[-12.219977,9.915583],[-12.219721,9.91507],[-12.219721,9.914791],[-12.219651,9.914418],[-12.219428,9.914027],[-12.219351,9.913631],[-12.219646,9.912965],[-12.219837,9.912209],[-12.219786,9.911748],[-12.219488,9.91116],[-12.219107,9.91089],[-12.218813,9.910601],[-12.21851,9.910508],[-12.218347,9.910368],[-12.218161,9.909949],[-12.217835,9.90974],[-12.217622,9.909366],[-12.217468,9.908827],[-12.217648,9.908059],[-12.21784,9.90779],[-12.218224,9.907585],[-12.218493,9.907329],[-12.218659,9.907022],[-12.218454,9.906727],[-12.218032,9.906843],[-12.217801,9.906817],[-12.217571,9.906983],[-12.217584,9.907278],[-12.217353,9.90747],[-12.216853,9.90738],[-12.216328,9.907508],[-12.216239,9.907803],[-12.216341,9.908149],[-12.216136,9.908315],[-12.215847,9.908205],[-12.215829,9.907854],[-12.215726,9.907649],[-12.215507,9.907551],[-12.215253,9.907624],[-12.214689,9.908097],[-12.214304,9.908149],[-12.214065,9.908064],[-12.213549,9.907573],[-12.213011,9.907522],[-12.212552,9.907355],[-12.212383,9.90697],[-12.212294,9.906227],[-12.211948,9.906061],[-12.21173,9.906087],[-12.2115,9.906407],[-12.211102,9.90674],[-12.210846,9.906714],[-12.210578,9.90633],[-12.210488,9.906061],[-12.209223,9.904944],[-12.208896,9.904804],[-12.208454,9.904711],[-12.208272,9.904486],[-12.207311,9.903922],[-12.206389,9.903986],[-12.206133,9.903871],[-12.20594,9.903687],[-12.205847,9.903501],[-12.205108,9.902885],[-12.204545,9.902103],[-12.204308,9.901582],[-12.203994,9.901527],[-12.203558,9.90177],[-12.20311,9.901911],[-12.202841,9.902206],[-12.202547,9.902424],[-12.201913,9.902663],[-12.201424,9.9025],[-12.201144,9.90229],[-12.200679,9.901662],[-12.200144,9.901499],[-12.199973,9.901335],[-12.19969,9.901309],[-12.199492,9.901056],[-12.199511,9.900835],[-12.19914,9.900861],[-12.19884,9.90101],[-12.198607,9.901196],[-12.198358,9.901092],[-12.198258,9.90087],[-12.197955,9.90101],[-12.197886,9.901173],[-12.197793,9.901196],[-12.19749,9.901103],[-12.19735,9.9008],[-12.197664,9.900242],[-12.197816,9.900079],[-12.197839,9.8998],[-12.197603,9.899542],[-12.197206,9.89917],[-12.19645,9.899016],[-12.19531,9.898901],[-12.195105,9.898658],[-12.195054,9.897979],[-12.195297,9.896404],[-12.195067,9.896096],[-12.194785,9.896096],[-12.19417,9.896506],[-12.193044,9.89696],[-12.192811,9.896936],[-12.192368,9.896773],[-12.191973,9.896494],[-12.191624,9.896005],[-12.1916,9.895656],[-12.191852,9.895238],[-12.191717,9.894887],[-12.191173,9.894649],[-12.191018,9.894376],[-12.190527,9.894165],[-12.190059,9.894201],[-12.188877,9.893118],[-12.18834,9.892783],[-12.187756,9.89257],[-12.186828,9.89257],[-12.186485,9.892702],[-12.186267,9.893086],[-12.185756,9.893134],[-12.185095,9.893337],[-12.1847432,9.8933819],[-12.184617,9.893398],[-12.184314,9.893212],[-12.184174,9.892932],[-12.184197,9.892723],[-12.184613,9.89269],[-12.184679,9.892446],[-12.184462,9.891997],[-12.184206,9.891716],[-12.184148,9.891297],[-12.184231,9.890986],[-12.184474,9.890602],[-12.184538,9.890204],[-12.184705,9.88982],[-12.184487,9.889538],[-12.18409,9.889462],[-12.183552,9.889436],[-12.18249,9.889612],[-12.181777,9.889464],[-12.180753,9.889743],[-12.18024,9.889743],[-12.179728,9.889604],[-12.179402,9.889277],[-12.179174,9.888949],[-12.178882,9.888737],[-12.178494,9.888766],[-12.177889,9.889254],[-12.17761,9.889394],[-12.177284,9.889301],[-12.177098,9.889022],[-12.177174,9.888693],[-12.177476,9.888419],[-12.177447,9.887974],[-12.176865,9.887066],[-12.176309,9.886734],[-12.175701,9.886196],[-12.175368,9.885811],[-12.175112,9.885734],[-12.174537,9.885739],[-12.173885,9.885297],[-12.173606,9.885344],[-12.173664,9.885555],[-12.173933,9.886093],[-12.173908,9.886694],[-12.173746,9.887229],[-12.173513,9.887485],[-12.172791,9.887857],[-12.172721,9.888323],[-12.172605,9.888626],[-12.172349,9.888858],[-12.172046,9.889022],[-12.17179,9.888905],[-12.171487,9.88827],[-12.171448,9.887797],[-12.171324,9.887182],[-12.171045,9.88688],[-12.17044,9.887113],[-12.170137,9.886996],[-12.17023,9.886461],[-12.170512,9.88627],[-12.170642,9.88594],[-12.170552,9.885453],[-12.170254,9.885134],[-12.170001,9.884684],[-12.169672,9.884436],[-12.169617,9.883864],[-12.169486,9.883411],[-12.169276,9.882899],[-12.168857,9.882294],[-12.168834,9.882038],[-12.168624,9.881619],[-12.168182,9.881456],[-12.167856,9.881526],[-12.167507,9.881712],[-12.167158,9.882107],[-12.166832,9.882177],[-12.166296,9.882131],[-12.16611,9.88234],[-12.165994,9.882783],[-12.165482,9.882969],[-12.165225,9.882527],[-12.164923,9.882317],[-12.16462,9.882573],[-12.164923,9.883085],[-12.165062,9.883481],[-12.165085,9.8839],[-12.164946,9.884086],[-12.16455,9.883993],[-12.164247,9.884249],[-12.163945,9.884343],[-12.163643,9.884203],[-12.163277,9.884415],[-12.163037,9.884831],[-12.162688,9.884924],[-12.162316,9.884697],[-12.162022,9.884326],[-12.161524,9.883132],[-12.16124,9.882724],[-12.160919,9.88246],[-12.16043,9.88269],[-12.159871,9.882177],[-12.159197,9.882294],[-12.158987,9.882084],[-12.158987,9.881875],[-12.159197,9.881572],[-12.158987,9.881316],[-12.158661,9.881363],[-12.158428,9.881456],[-12.158033,9.881479],[-12.157846,9.88113],[-12.157916,9.880711],[-12.157916,9.87985],[-12.157823,9.879594],[-12.15745,9.879384],[-12.15677,9.879715],[-12.156505,9.880049],[-12.156449,9.880641],[-12.156105,9.881008],[-12.155638,9.881233],[-12.15508,9.881149],[-12.154075,9.880571],[-12.153912,9.880269],[-12.154028,9.87971],[-12.154401,9.879035],[-12.154768,9.87851],[-12.154952,9.878088],[-12.154849,9.877704],[-12.154158,9.877144],[-12.153803,9.876731],[-12.153325,9.876436],[-12.152771,9.875962],[-12.152445,9.875962],[-12.152091,9.8762],[-12.151744,9.876123],[-12.15125,9.875437],[-12.150955,9.875264],[-12.150577,9.8753],[-12.150161,9.875411],[-12.149816,9.875078],[-12.149529,9.874677],[-12.14914,9.874682],[-12.148884,9.874961],[-12.148628,9.875008],[-12.148278,9.874822],[-12.148137,9.87463],[-12.14801,9.874194],[-12.147792,9.873977],[-12.147407,9.873961],[-12.147184,9.873564],[-12.146876,9.872422],[-12.146697,9.871953],[-12.146531,9.871852],[-12.146355,9.87204],[-12.146114,9.872184],[-12.145695,9.871944],[-12.145229,9.871865],[-12.144979,9.872024],[-12.144905,9.87229],[-12.145404,9.873152],[-12.145629,9.873165],[-12.145735,9.873377],[-12.145775,9.873616],[-12.145643,9.873841],[-12.145333,9.873861],[-12.144979,9.873709],[-12.144717,9.873774],[-12.144577,9.873844],[-12.144484,9.874076],[-12.144515,9.874398],[-12.144787,9.874705],[-12.145159,9.87538],[-12.145415,9.876265],[-12.145438,9.876893],[-12.145299,9.877336],[-12.145159,9.877475],[-12.14488,9.877359],[-12.144438,9.877266],[-12.144088,9.87701],[-12.143646,9.876567],[-12.14332,9.875985],[-12.143111,9.875706],[-12.143109,9.87538],[-12.142994,9.875124],[-12.142502,9.874899],[-12.142169,9.874579],[-12.141575,9.875008],[-12.141248,9.875008],[-12.140899,9.874798],[-12.140594,9.874425],[-12.140299,9.874169],[-12.140094,9.874143],[-12.13991,9.874274],[-12.139852,9.874472],[-12.139902,9.874771],[-12.140271,9.87531],[-12.140201,9.87566],[-12.139991,9.875822],[-12.139642,9.875752],[-12.1393,9.875488],[-12.138916,9.87536],[-12.138525,9.87552],[-12.138315,9.875822],[-12.13785,9.875985],[-12.137454,9.876009],[-12.137105,9.876381],[-12.136674,9.876526],[-12.13629,9.876154],[-12.136173,9.875357],[-12.13619,9.874848],[-12.136371,9.874544],[-12.136764,9.874425],[-12.1367,9.873887],[-12.1367,9.873349],[-12.136843,9.873014],[-12.137035,9.872726],[-12.137314,9.872168],[-12.137256,9.871993],[-12.13586,9.872831],[-12.135406,9.873336],[-12.134754,9.873494],[-12.134254,9.87399],[-12.133652,9.874412],[-12.133165,9.874592],[-12.132858,9.874656],[-12.132435,9.874271],[-12.131961,9.874041],[-12.131705,9.873707],[-12.131218,9.873848],[-12.130734,9.873815],[-12.13061,9.873867],[-12.130601,9.874146],[-12.130773,9.874319],[-12.130999,9.874412],[-12.131171,9.874571],[-12.131166,9.874796],[-12.130959,9.874938],[-12.130468,9.874889],[-12.129911,9.874637],[-12.129297,9.873773],[-12.129115,9.873125],[-12.128784,9.872734],[-12.128285,9.87226],[-12.127747,9.87212],[-12.12698,9.87213],[-12.125954,9.872414],[-12.125303,9.872098],[-12.125093,9.871842],[-12.125,9.871469],[-12.125186,9.87105],[-12.125198,9.870659],[-12.125096,9.870365],[-12.124084,9.869955],[-12.123623,9.86998],[-12.123279,9.87018],[-12.123133,9.870552],[-12.123114,9.871167],[-12.122701,9.872286],[-12.122278,9.87285],[-12.121804,9.872862],[-12.1202252,9.8722469],[-12.1199443,9.8722677],[-12.1199664,9.872595],[-12.1198094,9.8735005],[-12.1195424,9.8748512],[-12.1195244,9.8751815],[-12.1197445,9.8754721],[-12.120506,9.8759404],[-12.1214787,9.8764911],[-12.1225308,9.8770668],[-12.1234331,9.8773628],[-12.1249165,9.8775232],[-12.1257913,9.8774715],[-12.1265759,9.877766],[-12.1270205,9.8780306],[-12.1274292,9.8788323],[-12.1279475,9.8799088],[-12.1279735,9.8803094],[-12.127767,9.8809023],[-12.1275268,9.8812553],[-12.1273522,9.8818117],[-12.1273312,9.8820552],[-12.1273374,9.8825826],[-12.1274868,9.8834105],[-12.1275366,9.8844531],[-12.1274557,9.885238],[-12.127548,9.8861482],[-12.1278504,9.8873019],[-12.1280558,9.8881666],[-12.1286659,9.8890742],[-12.1286908,9.8896751],[-12.1286659,9.8904049],[-12.1285247,9.8912416],[-12.1283982,9.8916375],[-12.1284157,9.8924577],[-12.1283649,9.8931803],[-12.1283722,9.8938384],[-12.1285283,9.8942855],[-12.129139,9.8949306],[-12.1297519,9.8954086],[-12.1301536,9.8956664],[-12.1304773,9.8961018],[-12.1308384,9.89685],[-12.1310735,9.8977049],[-12.1313799,9.8982726],[-12.1319848,9.8989424],[-12.1325796,9.8992523],[-12.1332662,9.8993131],[-12.1341554,9.899261],[-12.1346679,9.8993537],[-12.1349653,9.8995038],[-12.1350346,9.8996971],[-12.1350269,9.9001976],[-12.1348332,9.9004231],[-12.134697,9.9010777],[-12.1345445,9.9018789],[-12.1343484,9.9022151],[-12.1339999,9.9025871],[-12.1337021,9.9027945],[-12.1332486,9.9032416],[-12.1329506,9.9037781],[-12.1328701,9.9043429],[-12.1328235,9.9049834],[-12.1325268,9.9056351],[-12.1322186,9.9063375],[-12.132201,9.9069863],[-12.1324387,9.9077424],[-12.1326565,9.9088641],[-12.1328079,9.9092028],[-12.1332289,9.9101183],[-12.1335391,9.9110551],[-12.1335567,9.9119483],[-12.1335524,9.9125715],[-12.1339581,9.9139371],[-12.1341466,9.91468],[-12.1343931,9.9160414],[-12.1346396,9.9170734],[-12.1344921,9.9175586],[-12.1342698,9.918088],[-12.1343786,9.9188704],[-12.1347745,9.9197943],[-12.1349799,9.9203607],[-12.1351903,9.921198],[-12.1351715,9.9217907],[-12.1351643,9.9223099],[-12.1349552,9.9227307],[-12.1348169,9.9231621],[-12.1349336,9.9237748],[-12.1351647,9.9246448],[-12.1352373,9.925134],[-12.1354441,9.9254211],[-12.1358373,9.9254439],[-12.1366075,9.9254186],[-12.1368638,9.9255323],[-12.1370235,9.9258586],[-12.1370645,9.9262177],[-12.1370425,9.9268381],[-12.1372032,9.927725],[-12.1372134,9.9290097],[-12.1371271,9.9295702],[-12.1370237,9.930274],[-12.1373245,9.9307556],[-12.1377758,9.9315521],[-12.1381519,9.932117],[-12.1382459,9.9325523],[-12.1382044,9.9337386],[-12.1381736,9.9343658],[-12.1382917,9.9354532],[-12.1381993,9.9359944],[-12.1380363,9.9363798],[-12.1379898,9.9369364],[-12.13792,9.9382134],[-12.1377471,9.9390516],[-12.1376807,9.939248],[-12.1378142,9.9396258],[-12.1380131,9.940191],[-12.1380042,9.9409003],[-12.1376191,9.9413656],[-12.1371355,9.9417626],[-12.1369893,9.9419198],[-12.1370772,9.9421858],[-12.1373084,9.9424044],[-12.1378402,9.9423782],[-12.1387444,9.9421293],[-12.1393878,9.9414625],[-12.1399988,9.9407798],[-12.1401937,9.9405315],[-12.1403788,9.9404409],[-12.1406192,9.9405577],[-12.1409915,9.9410423],[-12.1415366,9.9418805],[-12.1417292,9.9422667],[-12.1417095,9.9434128],[-12.14151,9.9441855],[-12.1414827,9.945104],[-12.1417095,9.9458488],[-12.1417627,9.9464774],[-12.1416933,9.9472939],[-12.1414211,9.9485279],[-12.1413338,9.9493068],[-12.1413698,9.9498226],[-12.1418292,9.9505504],[-12.1423211,9.9513886],[-12.1426329,9.9515877],[-12.1429594,9.951572],[-12.1434779,9.9512184],[-12.1438369,9.9509957],[-12.1441162,9.951035],[-12.1442358,9.9513755],[-12.1441785,9.9520934],[-12.1436136,9.9532971],[-12.1431567,9.9537876],[-12.1427764,9.9541933],[-12.1427179,9.954595],[-12.1426004,9.9550163],[-12.1426402,9.9556449],[-12.1428264,9.9562474],[-12.1430642,9.9569991],[-12.1432011,9.9577057],[-12.1432182,9.9584119],[-12.1429256,9.9593001],[-12.1426278,9.9598261],[-12.1426801,9.9605036],[-12.1428264,9.960962],[-12.143212,9.9617215],[-12.1435975,9.9623051],[-12.1437083,9.9626931],[-12.1437043,9.9631046],[-12.1433848,9.9639347],[-12.1430111,9.9647773],[-12.1430172,9.9650313],[-12.1430899,9.9652525],[-12.1434904,9.9654649],[-12.1441826,9.9655848],[-12.1449538,9.9655193],[-12.1455123,9.9656765],[-12.1457649,9.9659776],[-12.1457649,9.9663051],[-12.1456838,9.9665191],[-12.1450462,9.9670731],[-12.1444146,9.9674727],[-12.1441939,9.967766],[-12.1441028,9.9679881],[-12.1440964,9.9683904],[-12.1442624,9.9691468],[-12.1444839,9.9702093],[-12.1445278,9.9711144],[-12.1444731,9.9720257],[-12.144664,9.9728346],[-12.1449416,9.9736563],[-12.1447847,9.9747065],[-12.1442891,9.9756553],[-12.144103,9.9760874],[-12.1442758,9.9776589],[-12.1443398,9.9787948],[-12.144604,9.9796167],[-12.1444921,9.980491],[-12.1444119,9.9811185],[-12.1452536,9.9823846],[-12.1459488,9.9835664],[-12.146195,9.9843823],[-12.1465229,9.985019],[-12.1467062,9.9857227],[-12.1466993,9.9860792],[-12.1465552,9.9870607],[-12.1468434,9.9876875],[-12.1472696,9.9884916],[-12.1472636,9.9887045],[-12.1466512,9.9894435],[-12.1466752,9.9897155],[-12.1473738,9.9903803],[-12.1482242,9.9907207],[-12.1483657,9.9910377],[-12.148267,9.9919127],[-12.1480897,9.9922743],[-12.1468494,9.992524],[-12.1458347,9.9927132],[-12.1450703,9.9927646],[-12.1448141,9.9932039],[-12.1448117,9.9939081],[-12.1450723,9.9952733],[-12.1450585,9.9954484],[-12.1441117,9.99671],[-12.1433673,9.9976324],[-12.1432112,9.9981408],[-12.1431005,9.9989256],[-12.1431211,9.9995835],[-12.142941,10.0003816],[-12.1417943,10.0009965],[-12.1413861,10.0011544],[-12.1411864,10.0012964],[-12.1410512,10.0008265],[-12.1416843,10.0001929],[-12.1419864,9.9998377],[-12.1416923,9.9989804],[-12.1409598,9.9982473],[-12.1402754,9.9983359],[-12.1399085,9.9988191],[-12.1400833,9.9992051],[-12.1405204,9.9995635],[-12.1402814,9.9998613],[-12.1382573,9.9999279],[-12.1374429,9.9999535],[-12.136597,10.0003966],[-12.1352937,10.0006481],[-12.1340157,10.0008947],[-12.1330156,10.0010878],[-12.1321486,10.0009372],[-12.1311619,10.0007659],[-12.1310134,10.0008264],[-12.1307897,10.0016824],[-12.1305856,10.0025751],[-12.1302914,10.0032255],[-12.131192,10.0039054],[-12.1316242,10.0048928],[-12.1314423,10.00568],[-12.1311553,10.0066316],[-12.1312541,10.007971],[-12.1315522,10.0093151],[-12.1314801,10.0098827],[-12.1317983,10.0106336],[-12.1322546,10.0114317],[-12.1322606,10.0120466],[-12.1321764,10.0122004],[-12.1317443,10.0125545],[-12.1312639,10.0130053],[-12.1309353,10.0135294],[-12.1308038,10.0145319],[-12.1306764,10.0149571],[-12.1298663,10.0152087],[-12.1292877,10.0150109],[-12.1287936,10.0144552],[-12.1280503,10.0130332],[-12.1276823,10.0127125],[-12.1269744,10.012838],[-12.1258738,10.0134226],[-12.1249032,10.0140558],[-12.123427,10.0141811],[-12.1229114,10.0146782],[-12.1227345,10.0147061],[-12.1222673,10.0143576],[-12.1218284,10.0142809],[-12.1210852,10.0146991],[-12.1199656,10.01571],[-12.1196483,10.0179613],[-12.1187095,10.0192961],[-12.1185466,10.0203878],[-12.1186855,10.021446],[-12.1178291,10.0220739],[-12.1171686,10.0221519],[-12.1160215,10.0219896],[-12.115166,10.0222045],[-12.1141056,10.0223858],[-12.1132353,10.0226803],[-12.1125846,10.0225022],[-12.1119738,10.0226024],[-12.1118308,10.0231257],[-12.1116683,10.0242065],[-12.1118136,10.0249034],[-12.1121624,10.0265758],[-12.1122722,10.0270145],[-12.114076,10.0272433],[-12.1155878,10.0269634],[-12.1161643,10.0273818],[-12.1167053,10.0289267],[-12.1170757,10.0292185],[-12.1183546,10.0296383],[-12.1188802,10.0300348],[-12.1186727,10.0309728],[-12.1173111,10.0318939],[-12.1161276,10.0322385],[-12.1155692,10.0337853],[-12.1163699,10.0347123],[-12.1175709,10.0355007],[-12.1177873,10.036385],[-12.1172788,10.037557],[-12.1167796,10.0388534],[-12.1172181,10.0392581],[-12.117821,10.0395151],[-12.1185679,10.0394265],[-12.1195397,10.039586],[-12.1200796,10.040348],[-12.1201516,10.0412518],[-12.1196484,10.0420746],[-12.1190927,10.0433849],[-12.1190858,10.0450684],[-12.1182107,10.0461132],[-12.1165231,10.0470796],[-12.1146928,10.0482647],[-12.113416,10.0487122],[-12.1118552,10.0491067],[-12.110754,10.0485882],[-12.1105486,10.048904],[-12.1101556,10.0499317],[-12.1102457,10.0514077],[-12.1104787,10.0530313],[-12.1102872,10.0547519],[-12.110157,10.0557868],[-12.1100906,10.0568239],[-12.1102872,10.0571207],[-12.1111534,10.0574966],[-12.1112567,10.0578396],[-12.1112208,10.0587471],[-12.1115899,10.0592345],[-12.112368,10.0596269],[-12.1129444,10.059902],[-12.1135166,10.061022],[-12.1147038,10.0627658],[-12.1147547,10.0642689],[-12.1136677,10.0664094],[-12.1136146,10.0685286],[-12.1145602,10.070367],[-12.1160162,10.0735577],[-12.1162837,10.0757172],[-12.1160871,10.0772643],[-12.1166603,10.0781954],[-12.1176003,10.0805252],[-12.1173716,10.0817364],[-12.1167543,10.0829915],[-12.1166308,10.0842255],[-12.1167811,10.0853963],[-12.1161999,10.0866412],[-12.1162598,10.0879257],[-12.1175165,10.0895754],[-12.1180671,10.0908128],[-12.1184854,10.093905],[-12.1183723,10.0948384],[-12.1190625,10.0959],[-12.1219819,10.0998669],[-12.123116,10.1019333],[-12.1233361,10.1029998],[-12.12333,10.1039593],[-12.1235505,10.1048097],[-12.1235706,10.1058085],[-12.1234377,10.1070884],[-12.1236582,10.1077496],[-12.1245798,10.1083859],[-12.1255792,10.1085743],[-12.152967,10.1383138],[-12.170813,10.1662902],[-12.1863566,10.1711641],[-12.1909724,10.1975167],[-12.2075385,10.2128104],[-12.2115864,10.2355386],[-12.2209227,10.2475022],[-12.2302528,10.2737159],[-12.2569912,10.2774],[-12.2575773,10.2773431],[-12.2577273,10.2769624],[-12.2575329,10.2762417],[-12.2585447,10.2757565],[-12.2593852,10.2756055],[-12.2604022,10.2754805],[-12.2606564,10.277122],[-12.2608345,10.2780659],[-12.2614097,10.2789183],[-12.2631095,10.2787749],[-12.264132,10.2784396],[-12.2647158,10.2774755],[-12.2653745,10.2773882],[-12.2668445,10.2777929],[-12.2681001,10.2777137],[-12.2694014,10.2783935],[-12.2701385,10.2785658],[-12.2704205,10.2780693],[-12.271182,10.2762657],[-12.2715389,10.2757913],[-12.2724407,10.2759423],[-12.2732234,10.2763976],[-12.273751,10.2763777],[-12.274486,10.2767795],[-12.2756953,10.2765121],[-12.2768038,10.2768457],[-12.2772867,10.2776309],[-12.2781837,10.2780929],[-12.2789828,10.2780177],[-12.2804451,10.2777127],[-12.2816997,10.2777194],[-12.2827845,10.2770365],[-12.2838464,10.2771291],[-12.2843138,10.2769225],[-12.2859909,10.2769885],[-12.2882818,10.2768066],[-12.2883639,10.2771982],[-12.2890931,10.2776174],[-12.2898763,10.277423],[-12.2909377,10.2777932],[-12.2926928,10.277667],[-12.2931923,10.2778536],[-12.2937545,10.27878],[-12.2938416,10.2795445],[-12.2940598,10.2801431],[-12.2938549,10.2808017],[-12.2940483,10.2811078],[-12.2948527,10.2809711],[-12.2952557,10.280594],[-12.2959445,10.2807048],[-12.2963679,10.2805344],[-12.2967266,10.280881],[-12.298441,10.2814477],[-12.2995542,10.2821779],[-12.3007658,10.2826349],[-12.3019463,10.2836496],[-12.3025812,10.283743],[-12.3033009,10.2831369],[-12.3036822,10.2829259],[-12.3042295,10.2835467],[-12.3048031,10.2838603],[-12.3065879,10.2837262],[-12.3084157,10.2837926],[-12.3108118,10.2837859],[-12.3112389,10.2834063],[-12.3117365,10.2832391],[-12.3120425,10.2836362],[-12.3127431,10.2837165],[-12.3129712,10.2839409],[-12.3132171,10.2849611],[-12.3134243,10.2857175],[-12.3134116,10.286323],[-12.3128609,10.2867423],[-12.3124729,10.2872837],[-12.3124581,10.287799],[-12.3128096,10.2881975],[-12.313582,10.2880397],[-12.3142472,10.2873385],[-12.3151887,10.2870016],[-12.3157054,10.2869895],[-12.3168682,10.289219],[-12.3170327,10.2895707],[-12.3176628,10.2898663],[-12.317993,10.2897004],[-12.3195366,10.2897786],[-12.3200644,10.2900289],[-12.3202786,10.2905015],[-12.3205192,10.2909494],[-12.3204393,10.2913969],[-12.3199074,10.2918251],[-12.320001,10.2922475],[-12.3204866,10.2926901],[-12.3214596,10.2929458],[-12.32169,10.2934123],[-12.3222235,10.293529],[-12.3229549,10.2932914],[-12.3233898,10.2927189],[-12.3239476,10.2926473],[-12.324193,10.2929633],[-12.3241409,10.2933729],[-12.3243005,10.2941853],[-12.3246769,10.2947644],[-12.3252217,10.2958026],[-12.3256516,10.2959234],[-12.3264799,10.295479],[-12.3272849,10.2954129],[-12.3285766,10.2949694],[-12.3294046,10.29503],[-12.3300052,10.2945831],[-12.329916,10.2933478],[-12.3302453,10.2925575],[-12.3306878,10.2919401],[-12.3313937,10.2914144],[-12.3319628,10.2912386],[-12.3332321,10.2908913],[-12.3337916,10.2905816],[-12.3341927,10.2900253],[-12.3358739,10.2900319],[-12.3383539,10.2893186],[-12.3392674,10.2894113],[-12.3404978,10.2895531],[-12.3419053,10.2893472],[-12.3445806,10.2881372],[-12.3460195,10.2885144],[-12.3471086,10.2879882],[-12.3471277,10.2873519],[-12.3476737,10.2855777],[-12.349096,10.2849802],[-12.3496959,10.2824816],[-12.3516949,10.2819854],[-12.3538264,10.2821478],[-12.3544931,10.2826398],[-12.3553554,10.2838276],[-12.3579864,10.2850357],[-12.3590188,10.2840197],[-12.3616995,10.2850089],[-12.3627342,10.2877235],[-12.3667314,10.2878945],[-12.3677901,10.2877209],[-12.3693332,10.2860338],[-12.3712356,10.2858637],[-12.3719258,10.284166],[-12.3749918,10.2831603],[-12.3774027,10.2819742],[-12.3789531,10.2809573],[-12.3813658,10.279092],[-12.3825635,10.2774083],[-12.383596,10.2769004],[-12.3847855,10.2748939],[-12.38591,10.275052],[-12.3869265,10.2772191],[-12.3869906,10.2773294],[-12.3876198,10.2784129],[-12.3885236,10.2792034],[-12.3892095,10.2798033],[-12.3907877,10.2787681],[-12.3924953,10.278264],[-12.3947424,10.2775837],[-12.3956184,10.2767217],[-12.3966425,10.2748744],[-12.3981311,10.2742234],[-12.3991263,10.2750394],[-12.4001827,10.2762521],[-12.4010874,10.2758961],[-12.4026642,10.275034],[-12.4028379,10.2736676],[-12.4033251,10.2730283],[-12.4056901,10.2728621],[-12.408081,10.2733662],[-12.4085653,10.2735251],[-12.4095797,10.2758541],[-12.40975,10.2781997],[-12.4094079,10.2798826],[-12.4092364,10.2812324],[-12.4088886,10.2826013],[-12.4097752,10.2845204],[-12.4132093,10.2841825],[-12.4150516,10.2879726],[-12.4118707,10.2896198],[-12.4101368,10.2889373],[-12.4089046,10.2904961],[-12.4076891,10.2922046],[-12.4080338,10.2971228],[-12.4080338,10.304585],[-12.4103121,10.306137],[-12.4141214,10.3057962],[-12.4178341,10.3043018],[-12.4183399,10.306956],[-12.4200846,10.3079859],[-12.4215977,10.3086476],[-12.4217649,10.3111145],[-12.4202442,10.3126105],[-12.419049,10.3134504],[-12.4172787,10.3144955],[-12.4181754,10.3159071],[-12.4197312,10.3174377],[-12.4214675,10.3184626],[-12.4222566,10.3198254],[-12.4237314,10.3195048],[-12.4256318,10.3192035],[-12.4282118,10.3187612],[-12.4301706,10.3186328],[-12.4300096,10.3200581],[-12.4290675,10.3214442],[-12.4269097,10.3226935],[-12.4272152,10.3253797],[-12.4281201,10.3278736],[-12.4285853,10.3291905],[-12.4275214,10.3309278],[-12.4254432,10.3335154],[-12.4255865,10.3344081],[-12.426141,10.3355546],[-12.4269936,10.3366106],[-12.4298711,10.3373723],[-12.4320885,10.3383791],[-12.433447,10.3402167],[-12.4342998,10.342398],[-12.4346445,10.3446022],[-12.4352034,10.3453352],[-12.4373056,10.3441288],[-12.4384358,10.3438112],[-12.4387574,10.3450763],[-12.4382635,10.3460481],[-12.4370842,10.3465453],[-12.4336418,10.3478997],[-12.4324199,10.34893],[-12.4312081,10.3519955],[-12.4312081,10.3537021],[-12.4315565,10.3554157],[-12.432619,10.3564608],[-12.4335618,10.3564608],[-12.43374,10.354707],[-12.4335663,10.3536816],[-12.433056,10.3520083],[-12.433561,10.3505181],[-12.4341957,10.3497375],[-12.4349846,10.3505136],[-12.4349846,10.3520527],[-12.4360923,10.3524159],[-12.4371319,10.3515637],[-12.4386342,10.3515637],[-12.4396374,10.3522216],[-12.4403157,10.3532225],[-12.4409899,10.3543832],[-12.4408309,10.3553216],[-12.4397101,10.3553216],[-12.438865,10.3544902],[-12.4379895,10.3539735],[-12.436918,10.3537978],[-12.4356506,10.3548665],[-12.4360173,10.3554077],[-12.4361869,10.356575],[-12.4363548,10.3578971],[-12.4350103,10.3593849],[-12.4338402,10.3598783],[-12.4321368,10.3595432],[-12.4301926,10.3595432],[-12.428806,10.3648285],[-12.4279398,10.370793],[-12.4303402,10.3716362],[-12.4300064,10.3732776],[-12.4300064,10.374807],[-12.4301731,10.3762825],[-12.4293896,10.3765908],[-12.4285614,10.3761019],[-12.4271834,10.3750854],[-12.4257981,10.3745743],[-12.4237071,10.3740602],[-12.4231426,10.3744304],[-12.4229682,10.3766606],[-12.4231408,10.3792068],[-12.4238317,10.381076],[-12.4246956,10.3827756],[-12.4264236,10.384645],[-12.4274509,10.3853188],[-12.4279538,10.3859783],[-12.4284453,10.3872675],[-12.4276387,10.3887615],[-12.4266285,10.3887615],[-12.4254356,10.3885938],[-12.4242191,10.3882519],[-12.4226567,10.3887643],[-12.42143,10.3880451],[-12.4220681,10.3866331],[-12.4218881,10.3850405],[-12.4202593,10.3850405],[-12.4193585,10.3859265],[-12.4197062,10.3878073],[-12.4195403,10.3892752],[-12.4177063,10.3897671],[-12.4163326,10.3895983],[-12.4151046,10.3899434],[-12.414053,10.3914943],[-12.4131766,10.3936267],[-12.4132244,10.3947171],[-12.4130446,10.3962702],[-12.4116339,10.3974514],[-12.4102916,10.3987818],[-12.4102911,10.4000004],[-12.4104891,10.4012543],[-12.411698,10.4019399],[-12.4131945,10.4011909],[-12.41419,10.4011923],[-12.4150284,10.401337],[-12.4164483,10.4023511],[-12.4166107,10.4034693],[-12.4151076,10.4041263],[-12.4132188,10.4051396],[-12.4106864,10.406302],[-12.4093728,10.4050101],[-12.4097172,10.4039937],[-12.4084316,10.4029099],[-12.4066677,10.4051653],[-12.4058005,10.4075534],[-12.4061499,10.4097872],[-12.4073533,10.4108017],[-12.4076861,10.4122744],[-12.4066759,10.4137648],[-12.4051469,10.4151015],[-12.4030994,10.4157727],[-12.401013,10.4164568],[-12.4001343,10.4183581],[-12.4004799,10.4198879],[-12.4003097,10.4213943],[-12.3999649,10.42309],[-12.4001402,10.4244687],[-12.401716,10.426363],[-12.4036417,10.426363],[-12.4051729,10.4260283],[-12.4066849,10.4266892],[-12.4075378,10.4276958],[-12.408382,10.42836],[-12.4087204,10.430357],[-12.4087204,10.4325465],[-12.4087204,10.4357511],[-12.4085483,10.4374448],[-12.4090659,10.4403297],[-12.4097628,10.442043],[-12.411165,10.4429049],[-12.4133669,10.443238],[-12.4140385,10.4460451],[-12.4126858,10.448872],[-12.4086041,10.4503772],[-12.4067324,10.4502099],[-12.4045506,10.4498799],[-12.4043868,10.4485917],[-12.4050702,10.4467435],[-12.4054199,10.44468],[-12.404521,10.4437959],[-12.4022037,10.4436723],[-12.4010762,10.4447143],[-12.4005043,10.4463354],[-12.4009637,10.4489211],[-12.4012602,10.4509502],[-12.4019666,10.4533849],[-12.4017676,10.4541205],[-12.4010053,10.4546728],[-12.3992126,10.4552318],[-12.3988248,10.4567711],[-12.3997945,10.4587286],[-12.3998553,10.4605054],[-12.4016926,10.4619587],[-12.4021905,10.4632646],[-12.4017179,10.4640391],[-12.4002157,10.4635467],[-12.3991515,10.4635304],[-12.3984784,10.4636836],[-12.3911108,10.4680167],[-12.3865927,10.4734765],[-12.3888231,10.4790678],[-12.4032891,10.4851898],[-12.408517,10.4916022],[-12.4103588,10.5009234],[-12.4148464,10.5036139],[-12.4291453,10.4980754],[-12.438119,10.4986565],[-12.4413889,10.5117262],[-12.4346799,10.5242805],[-12.4375112,10.5343441],[-12.4468379,10.5356235],[-12.4541959,10.5424318],[-12.4684077,10.5442449],[-12.4786624,10.5401062],[-12.4822987,10.5437861],[-12.4841384,10.5515524],[-12.4918497,10.5589196],[-12.4990961,10.5597703],[-12.504583,10.5660103],[-12.505015,10.5868173],[-12.4992929,10.5965807],[-12.4931123,10.6030821],[-12.4936543,10.6195977],[-12.494707,10.6246246],[-12.4956562,10.6264284],[-12.4974915,10.6286988],[-12.4990105,10.6297873],[-12.5012254,10.630005],[-12.5033772,10.6297562],[-12.5047063,10.6291031],[-12.5059086,10.6282323],[-12.5116662,10.6216161],[-12.5226633,10.6093656],[-12.523882,10.608234],[-12.5259543,10.6071262],[-12.5366236,10.6050589],[-12.5399924,10.6034138],[-12.5422026,10.6014734],[-12.5482944,10.5929431],[-12.5500989,10.5890925],[-12.5515366,10.5873628],[-12.5530408,10.5864734],[-12.556137,10.5852431],[-12.5736723,10.580128],[-12.5762037,10.5792259],[-12.5787984,10.5777017],[-12.5805073,10.5756488],[-12.5910861,10.5616302],[-12.5930572,10.5595619],[-12.5949025,10.5583173],[-12.5968981,10.5576423],[-12.6002832,10.5570563],[-12.6116158,10.5575839],[-12.6206948,10.5576212],[-12.6394521,10.5566308],[-12.6422748,10.5556782],[-12.645186,10.5534385],[-12.6463253,10.5519453],[-12.6586714,10.5349173],[-12.6600695,10.5338995],[-12.6618093,10.5332684],[-12.6644622,10.5331717],[-12.6647403,10.5329204],[-12.6648125,10.532753],[-12.664876,10.5325655],[-12.6654232,10.530242],[-12.6657767,10.5287501],[-12.6660621,10.5270857],[-12.6663198,10.5253704],[-12.6663831,10.5251759],[-12.6664741,10.5250554],[-12.6668063,10.5247559],[-12.6669171,10.5245537],[-12.6673066,10.5231916],[-12.6676216,10.5227827],[-12.6679906,10.522626],[-12.6685945,10.5225931],[-12.6690557,10.5226343],[-12.6693241,10.5227827],[-12.6695338,10.523129],[-12.6700957,10.5232527],[-12.6708925,10.5231868],[-12.6727041,10.5230878],[-12.6730815,10.5230466],[-12.6734673,10.5228817],[-12.6736015,10.522626],[-12.6736434,10.5218509],[-12.6736685,10.5214881],[-12.6738614,10.5208449],[-12.6740711,10.5203172],[-12.6745827,10.5194349],[-12.6754633,10.5186268],[-12.6761595,10.5178929],[-12.6764195,10.5175466],[-12.6767465,10.5169693],[-12.6773085,10.5163261],[-12.677971,10.5157572],[-12.6782813,10.5155015],[-12.6785497,10.515114],[-12.6795226,10.5133163],[-12.6800426,10.5126154],[-12.680571,10.5118815],[-12.6809735,10.5116589],[-12.6814264,10.5115764],[-12.6823658,10.5114692],[-12.6830451,10.5111888],[-12.683758,10.5107435],[-12.6842696,10.510257],[-12.6848189,10.5095808],[-12.6852593,10.5090448],[-12.6858589,10.5076883],[-12.686123,10.5071151],[-12.6863327,10.5067646],[-12.6865508,10.5065543],[-12.6872176,10.505903],[-12.6886056,10.5045877],[-12.6897672,10.5031322],[-12.6901488,10.5027405],[-12.6904927,10.5023158],[-12.6906395,10.5019117],[-12.6906395,10.5016149],[-12.6905556,10.5013881],[-12.6904298,10.501149],[-12.6902285,10.500951],[-12.689935,10.5008273],[-12.6892682,10.5006418],[-12.688245,10.5003078],[-12.687725,10.5000274],[-12.6875237,10.4998007],[-12.686727,10.4985637],[-12.6864544,10.4980565],[-12.6861399,10.4974339],[-12.686056,10.4970917],[-12.6860518,10.4964526],[-12.6862237,10.4958629],[-12.6865634,10.4948445],[-12.6866599,10.4945682],[-12.6868108,10.4943868],[-12.6869786,10.4942301],[-12.6873182,10.4940487],[-12.6876286,10.4937023],[-12.6879473,10.4931416],[-12.6882785,10.4927251],[-12.6886895,10.4924324],[-12.6890753,10.4922097],[-12.6896666,10.4919788],[-12.6899266,10.4919004],[-12.6902201,10.4918963],[-12.6904298,10.4919664],[-12.6905178,10.4920777],[-12.6907736,10.4921437],[-12.6910294,10.4921437],[-12.6914027,10.492086],[-12.6918639,10.4919623],[-12.6923797,10.4917932],[-12.6928829,10.4914345],[-12.6931681,10.4910964],[-12.6937634,10.4906339],[-12.6942278,10.4903234],[-12.6947082,10.4900902],[-12.6950699,10.4898044],[-12.6956155,10.489023],[-12.696345,10.4880084],[-12.6972404,10.4867488],[-12.6974717,10.4862415],[-12.6974777,10.4859208],[-12.6974362,10.4854193],[-12.6974362,10.4850635],[-12.6975726,10.4847195],[-12.6983198,10.4838798],[-12.6993695,10.4831158],[-12.7006979,10.4824744],[-12.7011545,10.4821478],[-12.7014807,10.4815647],[-12.7018187,10.4807016],[-12.7019611,10.4798735],[-12.7019716,10.4790457],[-12.7015019,10.4778705],[-12.7012084,10.477351],[-12.7009945,10.4770005],[-12.7006758,10.4766211],[-12.7002984,10.4763366],[-12.7001265,10.4759366],[-12.7000719,10.4756314],[-12.7001139,10.4753016],[-12.7003026,10.4751201],[-12.7005919,10.4750459],[-12.7008351,10.4749717],[-12.7011237,10.474403],[-12.7011949,10.4739481],[-12.7011712,10.4734582],[-12.701017,10.472875],[-12.7004832,10.471802],[-12.7001274,10.4709155],[-12.6999733,10.4699708],[-12.6999582,10.4682175],[-12.699975,10.4676814],[-12.7001595,10.4668567],[-12.7004615,10.4660731],[-12.7008053,10.4654052],[-12.7018788,10.464102],[-12.7026757,10.463401],[-12.7029609,10.463269],[-12.7032795,10.4632691],[-12.7037911,10.463434],[-12.7040678,10.4640361],[-12.7042523,10.4645474],[-12.704613,10.4649927],[-12.7051749,10.4651659],[-12.7055859,10.4653639],[-12.7058375,10.4656443],[-12.7063239,10.4662134],[-12.7083703,10.4679866],[-12.7094438,10.4686793],[-12.7100812,10.469001],[-12.7106096,10.4690999],[-12.7123876,10.4689762],[-12.7130502,10.4690588],[-12.7137882,10.469405],[-12.7150714,10.4703783],[-12.7153063,10.4707164],[-12.7154572,10.4710545],[-12.7155327,10.4715163],[-12.715365,10.4719205],[-12.715214,10.4721514],[-12.7151553,10.4724565],[-12.7151889,10.4728113],[-12.7152056,10.4730008],[-12.7158867,10.4747496],[-12.7160611,10.4751452],[-12.7164721,10.4753514],[-12.7169333,10.4755576],[-12.7174366,10.475673],[-12.7179817,10.4756895],[-12.7198268,10.4762586],[-12.7217558,10.4771822],[-12.7238861,10.4784523],[-12.7242803,10.4787739],[-12.7245906,10.4790131],[-12.7252615,10.4792935],[-12.7259493,10.4793347],[-12.7284339,10.4790789],[-12.7295556,10.4789636],[-12.7317865,10.4786832],[-12.732382,10.4784853],[-12.7328181,10.4782461],[-12.7332794,10.4778915],[-12.7337407,10.4774461],[-12.7344284,10.476506],[-12.7355355,10.4744195],[-12.7360219,10.4737679],[-12.7365671,10.4732484],[-12.7372129,10.4728689],[-12.7380264,10.4725473],[-12.7391335,10.4721514],[-12.7397457,10.4720278],[-12.7401902,10.4720277],[-12.7407941,10.4721019],[-12.7412926,10.4722175],[-12.7416495,10.472407],[-12.742027,10.4727534],[-12.7422953,10.4730668],[-12.7424631,10.4734545],[-12.7430502,10.475038],[-12.7431592,10.475739],[-12.7431592,10.4760194],[-12.743134,10.4763245],[-12.7429831,10.4766214],[-12.7422702,10.477908],[-12.7420773,10.4783533],[-12.7416999,10.4792275],[-12.7415657,10.4800852],[-12.7415237,10.4803408],[-12.7416244,10.4808522],[-12.7418508,10.4812975],[-12.742354,10.4821057],[-12.7431089,10.483351],[-12.743914,10.4847942],[-12.7447359,10.4861879],[-12.7464552,10.4887114],[-12.7469836,10.4896186],[-12.7474449,10.4906412],[-12.7477301,10.4917215],[-12.7478223,10.4920596],[-12.7480907,10.4925379],[-12.7484429,10.4929667],[-12.7490216,10.4933048],[-12.7494829,10.4933791],[-12.74981,10.4934038],[-12.7502797,10.4932636],[-12.7505145,10.4929502],[-12.7507242,10.4925956],[-12.7511268,10.4921503],[-12.7517725,10.4916555],[-12.7526951,10.4914493],[-12.7533996,10.4914988],[-12.7540202,10.4916308],[-12.754557,10.491573],[-12.7561505,10.4911772],[-12.7568886,10.4909875],[-12.758155,10.4907649],[-12.7589769,10.4906989],[-12.7595137,10.4907896],[-12.759782,10.4909958],[-12.7600336,10.4915318],[-12.7605187,10.4933171],[-12.7616084,10.4963893],[-12.7617152,10.4970818],[-12.7620171,10.4978693],[-12.7626252,10.499028],[-12.7628349,10.4996341],[-12.762974,10.5005695],[-12.7633595,10.5016657],[-12.7635374,10.5025695],[-12.7632883,10.5036483],[-12.7627071,10.5054092],[-12.7626004,10.5058816],[-12.7626893,10.5061556],[-12.7629384,10.506348],[-12.7632409,10.5064647],[-12.7643387,10.5072412],[-12.7645127,10.5074443],[-12.7661061,10.5082808],[-12.7680987,10.5094731],[-12.7685013,10.5096958],[-12.7691135,10.5098112],[-12.7696503,10.5098112],[-12.7700948,10.5095968],[-12.7702684,10.5092927],[-12.7703841,10.5091382],[-12.770473,10.5090099],[-12.7707399,10.5088962],[-12.7710216,10.5088641],[-12.7714871,10.5086105],[-12.7719986,10.5081784],[-12.7724012,10.5075847],[-12.7726612,10.5067601],[-12.773047,10.5060344],[-12.7740702,10.5051026],[-12.7750598,10.5045996],[-12.7756217,10.5044511],[-12.7782636,10.5042615],[-12.7808552,10.5040553],[-12.7825996,10.5038162],[-12.783939,10.5038424],[-12.7842798,10.5038491],[-12.7862245,10.5038715],[-12.7864991,10.5038747],[-12.7896023,10.5032892],[-12.7912377,10.5030666],[-12.7923951,10.5032315],[-12.7932925,10.5036686],[-12.7944751,10.5046499],[-12.7959679,10.5056724],[-12.7972679,10.5069094],[-12.7977627,10.5079896],[-12.7977627,10.508402],[-12.7976789,10.5086906],[-12.7972344,10.5094492],[-12.7968821,10.509845],[-12.7964124,10.5101254],[-12.7956828,10.5102821],[-12.7951544,10.5101172],[-12.7948273,10.509911],[-12.7943157,10.5096471],[-12.7937035,10.5095729],[-12.7928396,10.5098203],[-12.7920009,10.5103068],[-12.7915564,10.5105047],[-12.7911371,10.5108263],[-12.7901307,10.5123354],[-12.7896023,10.5126652],[-12.7889397,10.5131435],[-12.7885791,10.5135806],[-12.788101,10.5143722],[-12.787841,10.51537],[-12.7878746,10.51584],[-12.7881513,10.5162935],[-12.7889565,10.5164172],[-12.7894849,10.5165244],[-12.7904452,10.5168913],[-12.7912797,10.5171429],[-12.7919758,10.5173078],[-12.7923448,10.517316],[-12.7928396,10.5170274],[-12.7932757,10.5166481],[-12.7937286,10.5162853],[-12.7942486,10.5161781],[-12.7948693,10.5163265],[-12.7953389,10.5164337],[-12.7964376,10.5164502],[-12.7980731,10.5163677],[-12.7984253,10.516409],[-12.7990795,10.5166234],[-12.7995072,10.5168625],[-12.799742,10.5171099],[-12.8000943,10.5179097],[-12.8001782,10.5187178],[-12.8001278,10.5213978],[-12.8003711,10.5235829],[-12.7997085,10.5261061],[-12.7996582,10.5263865],[-12.7997504,10.5267575],[-12.7999601,10.5272193],[-12.8002788,10.5276563],[-12.8014614,10.5290416],[-12.8019562,10.5296683],[-12.8024259,10.5305588],[-12.8027613,10.53154],[-12.8030907,10.5328115],[-12.8031387,10.5333541],[-12.8030907,10.5343305],[-12.8029794,10.5359762],[-12.8030297,10.5362812],[-12.8031637,10.5365987],[-12.8041655,10.5378292],[-12.8043612,10.53801],[-12.8046044,10.5380916],[-12.8048179,10.5381033],[-12.8051144,10.537975],[-12.8052982,10.5377534],[-12.8054524,10.537561],[-12.8056363,10.5374094],[-12.8058913,10.537322],[-12.8061937,10.5372287],[-12.8065436,10.5370713],[-12.8068639,10.5368672],[-12.807196,10.5366048],[-12.8074984,10.5362084],[-12.8093369,10.5334914],[-12.8114184,10.5314857],[-12.813755,10.5294392],[-12.8167025,10.5267338],[-12.8181673,10.5262381],[-12.8188078,10.5260574],[-12.8193119,10.526104],[-12.8197744,10.526209],[-12.8200294,10.5263023],[-12.8226601,10.5279172],[-12.8243231,10.5289086],[-12.8262267,10.5297423],[-12.826464,10.529824],[-12.8269147,10.5298415],[-12.827312,10.529789],[-12.8277449,10.5295849],[-12.8282965,10.5291535],[-12.8289903,10.5286404],[-12.829785,10.5280573],[-12.8305856,10.5273401],[-12.831066,10.526658],[-12.8313091,10.5259175],[-12.8314633,10.5251478],[-12.8314574,10.524454],[-12.8314692,10.5234044],[-12.8316887,10.5213929],[-12.8318785,10.520215],[-12.8321394,10.5191888],[-12.8322046,10.51846],[-12.8320623,10.5178477],[-12.8318132,10.5173929],[-12.8315582,10.5170723],[-12.8310304,10.5166116],[-12.8303365,10.5163201],[-12.8299926,10.5160344],[-12.8298147,10.5157603],[-12.8296071,10.5151539],[-12.8295537,10.51453],[-12.8295715,10.5139003],[-12.8297079,10.5135154],[-12.8298562,10.5132356],[-12.8304136,10.5127924],[-12.8310897,10.5124892],[-12.8321394,10.512256],[-12.8326316,10.5122152],[-12.8341261,10.5123901],[-12.8370201,10.5125767],[-12.8377614,10.5125942],[-12.8386095,10.5128332],[-12.8391492,10.513049],[-12.8396592,10.5134105],[-12.8402344,10.5141102],[-12.8416518,10.5154804],[-12.843941,10.5173346],[-12.8449432,10.5181276],[-12.8451804,10.5185008],[-12.8456311,10.5196786],[-12.845981,10.5209031],[-12.846497,10.5238009],[-12.8470189,10.5262615],[-12.8477898,10.5278649],[-12.8484066,10.5288852],[-12.8488454,10.5293983],[-12.8489476,10.5294988],[-12.8490411,10.5295907],[-12.8493851,10.5297657],[-12.8496401,10.5298123],[-12.8501027,10.5298006],[-12.8505475,10.529684],[-12.8509567,10.5295091],[-12.8515023,10.5291185],[-12.8534119,10.5282439],[-12.8539693,10.5281273],[-12.8544853,10.5281739],[-12.8559086,10.5284363],[-12.8561755,10.5284246],[-12.8567033,10.5282847],[-12.8571006,10.5281098],[-12.8575039,10.5277833],[-12.8578953,10.527311],[-12.8595677,10.5257542],[-12.8605996,10.5248738],[-12.8614476,10.5243257],[-12.8623135,10.5239467],[-12.8626989,10.5238884],[-12.8631793,10.5238942],[-12.8638435,10.5241333],[-12.8642349,10.5244656],[-12.8645314,10.5247572],[-12.8646263,10.5250779],[-12.86551,10.5266813],[-12.867129,10.5291243],[-12.867556,10.5302263],[-12.86755,10.5305061],[-12.8675144,10.5309493],[-12.8672594,10.5316256],[-12.8670282,10.5320046],[-12.8665893,10.5330074],[-12.866192,10.5342493],[-12.865931,10.5357186],[-12.8659014,10.5361734],[-12.8659844,10.5368264],[-12.8662552,10.5375008],[-12.8670667,10.5385026],[-12.8691305,10.5413362],[-12.8707851,10.5429396],[-12.8716331,10.5434351],[-12.8723211,10.5438083],[-12.8728904,10.5439424],[-12.8732818,10.5439715],[-12.873946,10.5438782],[-12.8744442,10.5437092],[-12.8750016,10.5433069],[-12.8758022,10.5423857],[-12.8794613,10.5386018],[-12.8813591,10.5369401],[-12.8816378,10.5364678],[-12.881875,10.5358498],[-12.8821775,10.5354941],[-12.8831975,10.5349344],[-12.8850478,10.5341648],[-12.8869396,10.5333602],[-12.8872361,10.5331969],[-12.8875208,10.5329695],[-12.8877402,10.5327247],[-12.8878351,10.5323049],[-12.8878351,10.5319201],[-12.8878173,10.5316344],[-12.8877106,10.5312729],[-12.8875089,10.5310513],[-12.8872421,10.5308472],[-12.8868803,10.5307131],[-12.8863169,10.5304916],[-12.8857416,10.5302817],[-12.8853265,10.5300951],[-12.885113,10.5298211],[-12.8850419,10.529547],[-12.8850063,10.5292088],[-12.8851367,10.5288532],[-12.885374,10.5283576],[-12.8856171,10.5278795],[-12.8857239,10.5272031],[-12.885629,10.5261828],[-12.8855637,10.5250225],[-12.8855163,10.5240896],[-12.8856764,10.5235065],[-12.8859374,10.5228943],[-12.8867202,10.5213025],[-12.8872954,10.519804],[-12.8876453,10.5184163],[-12.8878944,10.5176582],[-12.8881613,10.5171335],[-12.888529,10.5167603],[-12.8898514,10.5162997],[-12.8906402,10.5159323],[-12.8908359,10.5156583],[-12.8910257,10.5150344],[-12.8911799,10.5143347],[-12.8915001,10.5135592],[-12.8919567,10.5125213],[-12.8920872,10.5118507],[-12.892194,10.5109936],[-12.8926803,10.5082705],[-12.8932377,10.5059206],[-12.8934749,10.5053317],[-12.8938545,10.5049177],[-12.8942162,10.5047603],[-12.8947737,10.5046611],[-12.8964283,10.504597],[-12.8980532,10.5048594],[-12.8983628,10.5049634],[-12.898759,10.5052501],[-12.8991029,10.5056524],[-12.8992453,10.5059265],[-12.8994943,10.5063113],[-12.9000794,10.5078327],[-12.9002949,10.5083288],[-12.9007041,10.5087895],[-12.9012082,10.5090927],[-12.9016649,10.509256],[-12.902507,10.5093318],[-12.9032186,10.5091743],[-12.9038117,10.5090227],[-12.9048673,10.5089119],[-12.9064152,10.5089469],[-12.907026,10.5090577],[-12.9073759,10.5092093],[-12.9080223,10.5093726],[-12.9084612,10.5092443],[-12.9088229,10.5090052],[-12.9092084,10.5086554],[-12.9095642,10.5085387],[-12.9097808,10.5085251],[-12.9099482,10.5086],[-12.9107029,10.5088886],[-12.9120608,10.5089262],[-12.9136544,10.50818],[-12.9153191,10.5072234],[-12.9163047,10.5062709],[-12.9171265,10.5052773],[-12.9193406,10.504164],[-12.9203639,10.5046052],[-12.9212613,10.5047619],[-12.9219657,10.5048956],[-12.9245028,10.5055947],[-12.9253821,10.5059062],[-12.9264276,10.5063781],[-12.9271867,10.5067451],[-12.9276186,10.5068853],[-12.9280965,10.5074295],[-12.9293798,10.5077511],[-12.9311243,10.5081387],[-12.9316107,10.5082872],[-12.9311075,10.510225],[-12.9306127,10.5118701],[-12.9305036,10.5125051],[-12.9316653,10.5129751],[-12.9341859,10.5141004],[-12.9366638,10.5153046],[-12.9382448,10.5162076],[-12.939289,10.5167518],[-12.9404346,10.5173215],[-12.9406592,10.5173477],[-12.9417841,10.5179021],[-12.9430044,10.5184422],[-12.9437298,10.5188916],[-12.9439479,10.5190236],[-12.9441114,10.5190153],[-12.944384,10.519003],[-12.946942,10.5203429],[-12.9489476,10.5213611],[-12.9494244,10.5207176],[-12.950558,10.519011],[-12.9508462,10.5186648],[-12.9514792,10.5180032],[-12.9519167,10.5176092],[-12.9523097,10.5173472],[-12.9528054,10.5168927],[-12.9531008,10.5165869],[-12.9537074,10.5160013],[-12.9539594,10.5161292],[-12.9540889,10.516195],[-12.9544432,10.5164],[-12.9548352,10.5165702],[-12.9558082,10.5153951],[-12.9565546,10.5143067],[-12.9577721,10.5132032],[-12.9586261,10.5120637],[-12.9596007,10.5109814],[-12.9618971,10.5089137],[-12.962242,10.5085861],[-12.9625376,10.5100181],[-12.9622946,10.5114783],[-12.9606759,10.5150903],[-12.9601609,10.5171156],[-12.9630418,10.5195411],[-12.9635941,10.5206599],[-12.9608042,10.5259097],[-12.9594403,10.5284763],[-12.9583781,10.5301429],[-12.9580777,10.5311872],[-12.955653,10.5340985],[-12.9540651,10.5367038],[-12.9519944,10.5403534],[-12.9498916,10.5439712],[-12.9479729,10.5476628],[-12.9507195,10.5527256],[-12.9517495,10.5574508],[-12.9535132,10.5577791],[-12.9545843,10.558456],[-12.9559614,10.5577039],[-12.957262,10.5581552],[-12.9590216,10.559885],[-12.9582947,10.5616467],[-12.9577002,10.5637064],[-12.9563694,10.5660026],[-12.9568795,10.5708655],[-12.9571324,10.5719771],[-12.9578082,10.574949],[-12.9583331,10.577258],[-12.9617758,10.5800406],[-12.9618523,10.5827479],[-12.9636511,10.5837967],[-12.974276,10.6048748],[-12.9711539,10.6069206],[-12.9688818,10.6077714],[-12.9635803,10.6112808],[-12.9622819,10.6077714],[-12.9615191,10.6032274],[-12.9606011,10.601573],[-12.9589562,10.6010843],[-12.9567375,10.601573],[-12.9535626,10.6056338],[-12.9518412,10.6117624],[-12.9512292,10.6134919],[-12.9491252,10.6144695],[-12.9467536,10.6123264],[-12.9449558,10.6135671],[-12.9451016,10.6160269],[-12.9449939,10.6166126],[-12.9447272,10.6171174],[-12.9434929,10.6180171],[-12.9428551,10.6189302],[-12.9427579,10.6201297],[-12.9432295,10.6218334],[-12.9441142,10.624884],[-12.9450046,10.6253772],[-12.9460269,10.6256735],[-12.9468489,10.6264403],[-12.9473204,10.6275171],[-12.9473204,10.6284439],[-12.9462181,10.6304483],[-12.9466772,10.6329296],[-12.9463711,10.633456],[-12.9443805,10.6337459],[-12.9426471,10.6343183],[-12.9402064,10.6329962],[-12.9397349,10.6328735],[-12.9391663,10.6332279],[-12.9337856,10.6382981],[-12.9333003,10.6395655],[-12.93312,10.6412556],[-12.9320106,10.6435043],[-12.9296947,10.6463937],[-12.9251184,10.6555386],[-12.9237316,10.6598724],[-12.9236207,10.6610307],[-12.9236484,10.6622437],[-12.9238148,10.6630613],[-12.9243695,10.664029],[-12.9253819,10.6648602],[-12.9272263,10.6655281],[-12.9297086,10.6660186],[-12.9335499,10.6664685],[-12.9347702,10.6663457],[-12.9360045,10.665569],[-12.9372109,10.663879],[-12.9373053,10.6624786],[-12.9370307,10.6607445],[-12.9370723,10.6596408],[-12.937516,10.658932],[-12.938251,10.6582643],[-12.9395546,10.6582507],[-12.9408997,10.6590275],[-12.9419721,10.6618395],[-12.9439066,10.667387],[-12.9447645,10.6698466],[-12.9448218,10.670936],[-12.9448659,10.6717696],[-12.9438465,10.676425],[-12.9426748,10.6770844],[-12.9410107,10.6773979],[-12.937627,10.6766757],[-12.9341878,10.6766893],[-12.9322741,10.6775614],[-12.9312613,10.6786428],[-12.930764,10.6811989],[-12.9304131,10.6817803],[-12.9279308,10.6835792],[-12.9274177,10.68501],[-12.9272929,10.686618],[-12.9272065,10.6882282],[-12.926863,10.6892071],[-12.9260032,10.6896705],[-12.9217874,10.6900384],[-12.9219277,10.6910849],[-12.9216349,10.6922733],[-12.9217042,10.6931999],[-12.921524,10.6954347],[-12.9215834,10.6971742],[-12.9217736,10.6979556],[-12.9220925,10.6987187],[-12.9228075,10.699843],[-12.9235343,10.7008202],[-12.9241588,10.701185],[-12.9252266,10.7012941],[-12.9261003,10.7016075],[-12.926447,10.7022206],[-12.9264192,10.7028748],[-12.9260032,10.7039784],[-12.9255123,10.7044145],[-12.9243252,10.7044008],[-12.9234726,10.7045687],[-12.9231588,10.7057634],[-12.923355,10.7076134],[-12.9228647,10.7087503],[-12.9219037,10.709791],[-12.9190796,10.7132596],[-12.9169615,10.7167473],[-12.9150788,10.7191368],[-12.9137256,10.7207555],[-12.915788,10.7252126],[-12.9164006,10.727921],[-12.9182383,10.7310808],[-12.9180086,10.7323597],[-12.918468,10.7336387],[-12.9210015,10.7355154],[-12.9221979,10.7359587],[-12.9237276,10.7353998],[-12.9248062,10.734687],[-12.9260486,10.7326607],[-12.92758,10.7332625],[-12.9300033,10.7362863],[-12.9307878,10.7364982],[-12.9326116,10.7364982],[-12.9343571,10.7363441],[-12.9349259,10.7366331],[-12.9351397,10.7373337],[-12.9352788,10.7377892],[-12.9356515,10.739427],[-12.9343572,10.7414887],[-12.9347777,10.7431177],[-12.9357888,10.7455157],[-12.9367889,10.7461516],[-12.9384952,10.7466911],[-12.9398091,10.7469223],[-12.9427705,10.7466332],[-12.9442414,10.7466332],[-12.9449867,10.7469801],[-12.9472268,10.7494885],[-12.9485035,10.7504793],[-12.9488307,10.7511611],[-12.9486323,10.7522396],[-12.9479088,10.753234],[-12.9474885,10.7543266],[-12.9463685,10.7576626],[-12.9461646,10.7583583],[-12.9456979,10.7597601],[-12.9454351,10.7604136],[-12.9451668,10.7610039],[-12.9450113,10.7615414],[-12.9448664,10.7619182],[-12.9448825,10.7621475],[-12.9449379,10.7622317],[-12.9449871,10.762324],[-12.9454109,10.7625454],[-12.9466297,10.7629947],[-12.9481709,10.7633675],[-12.9484981,10.7633675],[-12.948651,10.7634703],[-12.9486671,10.7635967],[-12.9487127,10.7640869],[-12.9485437,10.7648194],[-12.9486483,10.7652779],[-12.948769,10.7655308],[-12.9490614,10.7658602],[-12.9493484,10.7662765],[-12.9498053,10.7670681],[-12.9506652,10.7679945],[-12.950781,10.7699732],[-12.9501798,10.7727082],[-12.9501798,10.7743021],[-12.9503185,10.7748743],[-12.9504178,10.7749826],[-12.951728,10.7764092],[-12.9518873,10.7774513],[-12.9518249,10.7786706],[-12.9511454,10.78068],[-12.9509374,10.7820422],[-12.9507155,10.7832274],[-12.9502441,10.7840312],[-12.9495923,10.7854275],[-12.9492127,10.7864434],[-12.9490376,10.7869123],[-12.9490237,10.7876412],[-12.9492941,10.7887991],[-12.9498835,10.7904474],[-12.9506047,10.7924771],[-12.9503827,10.7931719],[-12.9497171,10.7937372],[-12.9486493,10.7942753],[-12.9478312,10.7948814],[-12.9475398,10.795474],[-12.9474636,10.7963935],[-12.9471862,10.7968839],[-12.9467841,10.7976127],[-12.9465696,10.7986316],[-12.9471239,10.8000306],[-12.9479004,10.8023531],[-12.9482749,10.8032522],[-12.949516,10.804914],[-12.9502626,10.8058558],[-12.9514436,10.8073455],[-12.9530314,10.8092457],[-12.9539953,10.8102197],[-12.9547302,10.8106964],[-12.9557079,10.811466],[-12.956963,10.8132573],[-12.957476,10.8134411],[-12.9580654,10.8132981],[-12.9585854,10.8131619],[-12.959147,10.8133798],[-12.9599931,10.8138634],[-12.9605061,10.8149872],[-12.9609083,10.8159679],[-12.9611947,10.8188638],[-12.9611994,10.8195026],[-12.9608805,10.8201019],[-12.9603813,10.8207353],[-12.9599583,10.821968],[-12.959265,10.8240929],[-12.9594036,10.8252779],[-12.9595353,10.8260747],[-12.9599098,10.826783],[-12.9606378,10.8280497],[-12.9612412,10.8288261],[-12.961144,10.829405],[-12.9603606,10.8315298],[-12.9601108,10.8329736],[-12.9598266,10.8336546],[-12.9589599,10.8348872],[-12.9584537,10.8353163],[-12.9579822,10.8355478],[-12.9574068,10.8356635],[-12.9566232,10.8356023],[-12.95611,10.8356159],[-12.9558049,10.8354048],[-12.9556524,10.8350371],[-12.9555692,10.8345535],[-12.9552918,10.8338861],[-12.9545708,10.8335456],[-12.952976,10.8335184],[-12.9511386,10.8336546],[-12.9494882,10.8346965],[-12.9479698,10.8355138],[-12.9464652,10.8362764],[-12.9447526,10.8366306],[-12.9440314,10.8369983],[-12.9433589,10.8374615],[-12.9429844,10.838299],[-12.9429708,10.8394707],[-12.9439136,10.8418743],[-12.9444128,10.844217],[-12.9451148,10.8459382],[-12.9463068,10.846856],[-12.9474345,10.8480503],[-12.9476797,10.8498993],[-12.947915,10.8512379],[-12.9484347,10.852095],[-12.9493761,10.8527596],[-12.9517393,10.8537516],[-12.9525728,10.8543968],[-12.952818,10.8552057],[-12.9527395,10.8560821],[-12.9523767,10.8572569],[-12.951553,10.858143],[-12.950543,10.8594141],[-12.9496212,10.8621974],[-12.9495134,10.8647012],[-12.9500723,10.8665791],[-12.9501409,10.8673109],[-12.9495559,10.8689495],[-12.948876,10.8715578],[-12.9485034,10.8719332],[-12.9475914,10.8719622],[-12.9464441,10.871548],[-12.9451301,10.8707489],[-12.9437475,10.8693428],[-12.9429925,10.8686495],[-12.9424433,10.8689094],[-12.9418648,10.8694488],[-12.9416392,10.8700939],[-12.9415216,10.8706622],[-12.9416883,10.8728577],[-12.9421688,10.8750919],[-12.9426983,10.8762281],[-12.9437279,10.8776822],[-12.9450223,10.878992],[-12.9462284,10.8798104],[-12.9482092,10.8807252],[-12.9493663,10.8815342],[-12.9503861,10.8825837],[-12.951298,10.8837297],[-12.9523375,10.8848755],[-12.9536318,10.8857712],[-12.9556715,10.8865704],[-12.956505,10.8866955],[-12.957162,10.8869651],[-12.9575738,10.8873985],[-12.9579464,10.8881688],[-12.957917,10.8888911],[-12.9575836,10.8895458],[-12.9569658,10.8903644],[-12.9558284,10.891279],[-12.9543379,10.8922323],[-12.953573,10.8925502],[-12.9528572,10.8925116],[-12.9495428,10.8912117],[-12.9456891,10.890037],[-12.9421295,10.8890258],[-12.938217,10.8874082],[-12.9360009,10.8861659],[-12.933618,10.8846927],[-12.9331866,10.8847022],[-12.9328532,10.8850875],[-12.9329708,10.8862719],[-12.9335788,10.8883999],[-12.9344908,10.8907687],[-12.9356773,10.8938789],[-12.9363048,10.8951982],[-12.937207,10.8963921],[-12.9382758,10.8976633],[-12.9388348,10.9009659],[-12.938923,10.9025259],[-12.9390015,10.9036139],[-12.9386484,10.9041436],[-12.93655,10.9061848],[-12.9354811,10.9068203],[-12.9339416,10.907581],[-12.928617,10.908852],[-12.9265186,10.9098822],[-12.9255086,10.910277],[-12.9244005,10.9104022],[-12.9193995,10.9107777],[-12.9186444,10.9109702],[-12.9184581,10.9114132],[-12.9185366,10.9122027],[-12.9188602,10.9130693],[-12.9193897,10.9140899],[-12.9202918,10.9154861],[-12.9221942,10.9175272],[-12.9243417,10.9195012],[-12.9248908,10.920281],[-12.9254203,10.9212245],[-12.9258223,10.9226304],[-12.926499,10.9241997],[-12.9271461,10.9252781],[-12.9280679,10.9264526],[-12.9291956,10.9273673],[-12.9299016,10.9281569],[-12.9304801,10.9294085],[-12.930588,10.9301403],[-12.9302742,10.9327976],[-12.92998,10.9338855],[-12.9293427,10.9346075],[-12.9284405,10.9352816],[-12.9278816,10.9354741],[-12.9271363,10.9354452],[-12.926293,10.9346654],[-12.9243122,10.932528],[-12.9238219,10.9324124],[-12.9230081,10.932451],[-12.9207527,10.9332597],[-12.9180071,10.9340877],[-12.9173893,10.9348675],[-12.9167323,10.9367932],[-12.9160949,10.9381409],[-12.9156536,10.9387282],[-12.9146436,10.9396429],[-12.9136925,10.940596],[-12.9124961,10.9425698],[-12.9121235,10.9436768],[-12.9120745,10.9449766],[-12.9123581,10.9458552],[-12.9128492,10.946671],[-12.9139866,10.9472391],[-12.9164602,10.9480216],[-12.9177938,10.9482094],[-12.9220006,10.9479976],[-12.9228978,10.9485752],[-12.9232373,10.9497123],[-12.9230613,10.9505229],[-12.922547,10.9515064],[-12.9194337,10.9543636],[-12.9170243,10.9568221],[-12.9162663,10.9567424],[-12.9149668,10.9557723],[-12.9137215,10.9540579],[-12.913532,10.9514532],[-12.9130718,10.9507489],[-12.9108925,10.9499781],[-12.9098773,10.9502439],[-12.9097013,10.9509748],[-12.9101886,10.9530214],[-12.910351,10.9546958],[-12.9100262,10.958151],[-12.9097419,10.9593205],[-12.909038,10.9600912],[-12.9077521,10.960862],[-12.9042581,10.961315],[-12.9009407,10.9611953],[-12.8975149,10.9620062],[-12.8959036,10.9643193],[-12.895538,10.966845],[-12.8952401,10.967616],[-12.8941434,10.9676293],[-12.8919092,10.9666323],[-12.8889709,10.964532],[-12.8877658,10.9652232],[-12.8872106,10.9664994],[-12.8861003,10.9733453],[-12.8853691,10.9745284],[-12.8835276,10.9774395],[-12.8815778,10.9793403],[-12.8784635,10.9810817],[-12.8742389,10.9836604],[-12.8720724,10.9860663],[-12.870258,10.9895356],[-12.8693914,10.9906255],[-12.8675363,10.9909578],[-12.864598,10.9895223],[-12.8631086,10.988233],[-12.8616191,10.9856144],[-12.8616327,10.9845776],[-12.8611181,10.9839262],[-12.8589787,10.9837269],[-12.8581257,10.9838199],[-12.8570018,10.9849896],[-12.8562165,10.9861594],[-12.851545,10.9902135],[-12.8496629,10.9923535],[-12.8483766,10.9934435],[-12.8471308,10.9936694],[-12.845858,10.9931909],[-12.845506,10.9923668],[-12.8446935,10.9920345],[-12.8434614,10.9921807],[-12.8425271,10.9926194],[-12.8410376,10.9932574],[-12.8399815,10.9948391],[-12.8395211,10.9963943],[-12.8394534,10.9997172],[-12.8389118,11.0013388],[-12.8390472,11.0018838],[-12.8402387,11.002349],[-12.8415928,11.0028673],[-12.8412949,11.0035452],[-12.8398596,11.005087],[-12.8393586,11.0061105],[-12.8396485,11.0100049],[-12.8391493,11.0130608],[-12.8393157,11.0148168],[-12.8390938,11.0167565],[-12.8389135,11.0200302],[-12.8387125,11.021126],[-12.8382479,11.0221195],[-12.8377417,11.0229772],[-12.8368819,11.0241341],[-12.8360915,11.0252776],[-12.8356269,11.0255837],[-12.8352558,11.0255817],[-12.8336092,11.0253183],[-12.832629,11.0250368],[-12.8322709,11.0247602],[-12.8320213,11.0243792],[-12.8319035,11.0236509],[-12.8319659,11.022494],[-12.8322432,11.0211327],[-12.8329404,11.0191491],[-12.8331585,11.0171173],[-12.8330406,11.0164366],[-12.8328256,11.0158377],[-12.8325483,11.0154361],[-12.8320768,11.0150482],[-12.8306138,11.0144356],[-12.8287971,11.0138231],[-12.8281176,11.0136869],[-12.8275919,11.0138061],[-12.8268002,11.0142246],[-12.8258858,11.0147099],[-12.8254827,11.014701],[-12.8252494,11.0144972],[-12.8250736,11.0143335],[-12.8250528,11.0139388],[-12.8253441,11.0131969],[-12.82567,11.012319],[-12.8260444,11.0114273],[-12.8262247,11.0104677],[-12.8265228,11.0079493],[-12.8266407,11.0060028],[-12.8267378,11.0045734],[-12.82671,11.0032803],[-12.8261623,11.0008436],[-12.8251499,10.9991829],[-12.8249072,10.9989445],[-12.8244641,10.9987469],[-12.8239226,10.9988765],[-12.8236175,10.9991148],[-12.8233957,10.9994482],[-12.8231669,10.9999655],[-12.8227231,11.0009321],[-12.8221753,11.0016739],[-12.8215513,11.0023138],[-12.8208718,11.0027969],[-12.8203884,11.0030268],[-12.8194781,11.0030692],[-12.8183573,11.0030135],[-12.8170998,11.002831],[-12.8157061,11.0024363],[-12.8147977,11.0020551],[-12.8136994,11.0014983],[-12.8131822,11.0016058],[-12.8119933,11.0019901],[-12.8095697,11.0030761],[-12.8088208,11.0036409],[-12.8082697,11.0041167],[-12.808072,11.0045053],[-12.8079957,11.0053765],[-12.8079679,11.0066834],[-12.8077946,11.0085007],[-12.8074063,11.0099367],[-12.8067129,11.0117813],[-12.8069279,11.0129588],[-12.8071706,11.0148577],[-12.8068655,11.0178319],[-12.8070596,11.0187982],[-12.807233,11.0194041],[-12.8076698,11.0198533],[-12.8078362,11.0202344],[-12.8075727,11.0205678],[-12.8072399,11.0208129],[-12.8051824,11.0218072],[-12.8044594,11.0224395],[-12.8042029,11.0229771],[-12.8041058,11.0238482],[-12.8037928,11.0248336],[-12.8024905,11.0289224],[-12.8016634,11.0306727],[-12.8012427,11.0314752],[-12.8009128,11.032362],[-12.8006786,11.0334179],[-12.8004778,11.0354121],[-12.80043,11.0363508],[-12.8005447,11.0377115],[-12.8007933,11.0402267],[-12.8006451,11.0405551],[-12.8003296,11.0408931],[-12.7999949,11.0411511],[-12.799359,11.0414374],[-12.7991821,11.0418033],[-12.7990052,11.043],[-12.7986467,11.0443326],[-12.7975901,11.0461251],[-12.7963901,11.0487246],[-12.7951136,11.0507236],[-12.792996,11.0532514],[-12.7894243,11.0566076],[-12.7891374,11.0575554],[-12.7890178,11.0587473],[-12.7888839,11.0601361],[-12.7879899,11.0619942],[-12.7879325,11.064223],[-12.7875692,11.0657948],[-12.7870337,11.0686757],[-12.7867086,11.0704962],[-12.7861158,11.0711812],[-12.7832568,11.0731377],[-12.7828886,11.0736163],[-12.7834764,11.0744743],[-12.7847532,11.0761218],[-12.7847436,11.0764549],[-12.7843474,11.0770693],[-12.783126,11.0780337],[-12.7849601,11.0795212],[-12.7985631,11.0873612],[-12.8023786,11.0895602],[-12.8029315,11.0968858],[-12.8242207,11.1145206],[-12.8554633,11.121303],[-12.8593341,11.1343247],[-12.8590576,11.1560262],[-12.8587811,11.1809809],[-12.8687345,11.2013228],[-12.8850471,11.2162394],[-12.9138013,11.2330534],[-12.9301138,11.2346805],[-12.9400672,11.2327822],[-12.959974,11.2222058],[-12.9724234,11.2235782],[-12.9725629,11.2226837],[-12.9727882,11.2218891],[-12.9727292,11.2210157],[-12.9725897,11.2199738],[-12.9730833,11.2193003],[-12.9731081,11.2186648],[-12.9728851,11.2181993],[-12.9726442,11.2171674],[-12.9728643,11.2165001],[-12.9732455,11.2159421],[-12.9739086,11.2154822],[-12.9751264,11.2153755],[-12.9756132,11.2158801],[-12.9760628,11.2163422],[-12.9769125,11.2169626],[-12.9777152,11.2170136],[-12.9783036,11.2166686],[-12.9789205,11.2155257],[-12.9816671,11.2081167],[-12.9840544,11.2050523],[-12.9861523,11.2018395],[-12.9871177,11.2001761],[-12.98862,11.1986343],[-12.9889967,11.1989561],[-12.9892815,11.2000112],[-12.9904682,11.2010935],[-12.991864,11.2011374],[-12.9929755,11.2000636],[-12.9931881,11.1992127],[-12.9940414,11.1980543],[-12.9954762,11.1964582],[-12.997532,11.1940056],[-12.9994597,11.1915278],[-12.9997177,11.1915107],[-13.0000512,11.19163],[-13.0006082,11.1914756],[-13.0022867,11.1905184],[-13.0040427,11.1893996],[-13.0055248,11.1885714],[-13.0056829,11.1883059],[-13.0057607,11.1878341],[-13.0062788,11.1870835],[-13.007369,11.1867793],[-13.0085757,11.1863249],[-13.0110212,11.1867307],[-13.0147977,11.1868991],[-13.018231,11.1879095],[-13.0221792,11.1879094],[-13.0238958,11.1884146],[-13.0256124,11.189425],[-13.0282171,11.1887257],[-13.0301379,11.1863273],[-13.0321157,11.1851388],[-13.0329793,11.1844687],[-13.0340908,11.1843432],[-13.0387026,11.1843038],[-13.0414893,11.183709],[-13.042036,11.1834138],[-13.0430865,11.1822412],[-13.0448007,11.1806801],[-13.0456433,11.1791406],[-13.0467268,11.1783105],[-13.0485882,11.1767161],[-13.0492646,11.1767118],[-13.0499102,11.1782927],[-13.050857,11.1790194],[-13.0516776,11.179218],[-13.0525632,11.1793209],[-13.0546929,11.178079],[-13.0586189,11.1773493],[-13.0590427,11.177602],[-13.0598581,11.1781124],[-13.0620575,11.1777072],[-13.0630553,11.1778755],[-13.0651152,11.1777283],[-13.0657697,11.1767809],[-13.0665422,11.1755178],[-13.0672073,11.1739074],[-13.0677331,11.1722024],[-13.0692037,11.1701639],[-13.0707594,11.1697217],[-13.0717779,11.1702235],[-13.0717142,11.1728794],[-13.0722929,11.1734233],[-13.0732055,11.1737214],[-13.0762525,11.1715742],[-13.0777009,11.1702585],[-13.0795141,11.168206],[-13.081574,11.1671956],[-13.0846639,11.1670272],[-13.0868955,11.168206],[-13.0880972,11.1692165],[-13.0891479,11.1704288],[-13.0899472,11.1709445],[-13.0901081,11.1710024],[-13.0902691,11.1709445],[-13.0903374,11.1706033],[-13.0906321,11.1687679],[-13.0914707,11.1682657],[-13.0923701,11.1680161],[-13.0928052,11.1685465],[-13.0930532,11.1688552],[-13.0933825,11.1688815],[-13.0935722,11.1686598],[-13.0936132,11.1674835],[-13.0939383,11.1671974],[-13.0939728,11.1667703],[-13.0943534,11.1656051],[-13.095362,11.1646401],[-13.0966802,11.1641642],[-13.0978061,11.1641607],[-13.0983318,11.1650554],[-13.0980797,11.1665948],[-13.0980823,11.1667185],[-13.0981394,11.166785],[-13.1018086,11.166322],[-13.1053223,11.1658536],[-13.1068827,11.1663606],[-13.1082399,11.1662185],[-13.1093235,11.1660764],[-13.1101496,11.1678974],[-13.1118723,11.1684165],[-13.1141568,11.1688341],[-13.1148757,11.1664764],[-13.1158171,11.1651896],[-13.1163884,11.1639186],[-13.1172045,11.1634905],[-13.1205519,11.1620906],[-13.1217527,11.1616978],[-13.1222946,11.1614978],[-13.1226091,11.1614736],[-13.1263138,11.1629806],[-13.1299014,11.1648027],[-13.1301883,11.1647371],[-13.1304538,11.1645345],[-13.1308347,11.1639766],[-13.1317903,11.1627326],[-13.132554,11.1604741],[-13.1329966,11.1593531],[-13.1332245,11.1588768],[-13.1334822,11.1585057],[-13.1337824,11.1583505],[-13.1341741,11.1582426],[-13.1350914,11.1579768],[-13.1367578,11.157396],[-13.139053,11.1562137],[-13.141703,11.1548558],[-13.1456037,11.1522066],[-13.1494492,11.1493611],[-13.1533983,11.146854],[-13.153891,11.1469138],[-13.1541654,11.1472066],[-13.1545402,11.1479506],[-13.1545508,11.1485085],[-13.1546367,11.1490138],[-13.1550711,11.1493717],[-13.1566001,11.1499612],[-13.1581779,11.1506066],[-13.1598194,11.1486277],[-13.1619533,11.145425],[-13.1624495,11.1444561],[-13.1625719,11.1440863],[-13.1632541,11.1429227],[-13.1637961,11.1421219],[-13.1644846,11.1411148],[-13.1659702,11.1395008],[-13.1662764,11.1394132],[-13.1665888,11.1394695],[-13.1668056,11.1397072],[-13.1669267,11.1401514],[-13.167016,11.1408145],[-13.1671051,11.1413149],[-13.1673858,11.1423472],[-13.1677428,11.1432355],[-13.1680871,11.1441676],[-13.1683931,11.1447619],[-13.1688969,11.1458879],[-13.1695089,11.1469514],[-13.1705992,11.1486779],[-13.1714983,11.1501981],[-13.1730987,11.1525502],[-13.1733027,11.1527566],[-13.1734429,11.1527441],[-13.1737363,11.152619],[-13.1753137,11.1518229],[-13.1764332,11.1514242],[-13.1778233,11.1507673],[-13.1783205,11.1502231],[-13.1785884,11.1499416],[-13.1787478,11.1496726],[-13.1787924,11.1491972],[-13.1787095,11.1487405],[-13.1786075,11.1482901],[-13.1786138,11.1476645],[-13.1795391,11.1456855],[-13.1802331,11.1447427],[-13.1804181,11.143819],[-13.1807943,11.1430696],[-13.18294,11.1416381],[-13.1865924,11.1406919],[-13.1867576,11.1406491],[-13.1880862,11.1403222],[-13.1893016,11.1401399],[-13.1910128,11.1403819],[-13.1917271,11.1403012],[-13.1926283,11.1379116],[-13.1938514,11.1366379],[-13.1948707,11.1352799],[-13.1955573,11.1335114],[-13.1972954,11.1328166],[-13.1978264,11.1336061],[-13.197644,11.1352799],[-13.198743,11.1359449],[-13.2014903,11.1354167],[-13.2020367,11.1357554],[-13.2032498,11.1375537],[-13.2050032,11.1378134],[-13.2068279,11.1373169],[-13.2103309,11.135322],[-13.2115218,11.1325008],[-13.2137747,11.1316271],[-13.2154699,11.1311534],[-13.216929,11.1313323],[-13.2197316,11.1308741],[-13.2216775,11.1288203],[-13.2224992,11.1286489],[-13.2235597,11.1294756],[-13.2239219,11.1297579],[-13.2259148,11.1297515],[-13.2263305,11.1293355],[-13.2265772,11.1279781],[-13.2271952,11.1269534],[-13.2275527,11.1270186],[-13.2283841,11.1285523],[-13.2299756,11.1283284],[-13.2319817,11.1298059],[-13.2322813,11.1303551],[-13.2324583,11.1311078],[-13.2328722,11.1328587],[-13.233086,11.1341396],[-13.2334086,11.1353957],[-13.2337619,11.1359186],[-13.2342669,11.1362747],[-13.2352371,11.1368923],[-13.2354088,11.1373029],[-13.235457,11.1377555],[-13.2350823,11.138638],[-13.2344278,11.140438],[-13.2345022,11.1411451],[-13.2350279,11.1420241],[-13.2361713,11.1441855],[-13.2370878,11.1463294],[-13.2382259,11.1484697],[-13.2387614,11.1500663],[-13.2389983,11.1510487],[-13.2391477,11.1515505],[-13.2398343,11.1520558],[-13.2417986,11.1529645],[-13.2438684,11.1543084],[-13.2448232,11.1550557],[-13.2458326,11.155554],[-13.2466042,11.156182],[-13.246851,11.1566978],[-13.2468295,11.1570662],[-13.246648,11.1577855],[-13.2463145,11.1586346],[-13.2461759,11.159459],[-13.2458317,11.1610135],[-13.2458219,11.1627116],[-13.2456287,11.1654483],[-13.2458694,11.1669632],[-13.2462832,11.1684798],[-13.2467553,11.1707427],[-13.2473016,11.1717181],[-13.2474786,11.1720287],[-13.2477307,11.1722444],[-13.2480098,11.1723391],[-13.2483422,11.1723392],[-13.2495493,11.1720339],[-13.2500911,11.1719919],[-13.2506069,11.1721058],[-13.2511963,11.1724549],[-13.2518891,11.1729478],[-13.2521296,11.1732287],[-13.2521939,11.1736022],[-13.2516467,11.1741864],[-13.2510781,11.1747811],[-13.2508644,11.1753318],[-13.2509977,11.1765178],[-13.2512721,11.177979],[-13.2514376,11.1788966],[-13.251502,11.1792964],[-13.2514858,11.1798016],[-13.2513571,11.1806648],[-13.251315,11.1815944],[-13.2517165,11.1824488],[-13.2523012,11.1832013],[-13.2529664,11.1843064],[-13.2531971,11.1845644],[-13.2535788,11.1846888],[-13.2566419,11.1853413],[-13.2575826,11.1855584],[-13.2580358,11.1857116],[-13.2584926,11.1860149],[-13.2592106,11.1867166],[-13.2595548,11.187541],[-13.2594949,11.1883271],[-13.2593072,11.1892111],[-13.258042,11.191109],[-13.2575798,11.1927158],[-13.2572481,11.1943822],[-13.2573974,11.1957575],[-13.2574449,11.1958776],[-13.2580099,11.197308],[-13.2579446,11.1985465],[-13.2571407,11.1994761],[-13.2567645,11.1999594],[-13.2564292,11.2004777],[-13.2559177,11.2016757],[-13.2547375,11.2032807],[-13.2543129,11.2042351],[-13.2544094,11.2052664],[-13.2546723,11.2057979],[-13.2548118,11.2061821],[-13.2547804,11.2064327],[-13.2543719,11.2071871],[-13.2539535,11.2077659],[-13.2536316,11.2090393],[-13.2539758,11.2096426],[-13.2558104,11.2111476],[-13.256067,11.2120492],[-13.2557354,11.2128735],[-13.2552195,11.2144487],[-13.25486,11.2156117],[-13.254362,11.2162833],[-13.2536638,11.2172165],[-13.2533956,11.2177427],[-13.2533956,11.2182794],[-13.2535833,11.2187057],[-13.2538784,11.2190581],[-13.2542485,11.2192161],[-13.254683,11.2193633],[-13.2548989,11.2192805],[-13.2551175,11.2191477],[-13.2556817,11.218567],[-13.2561958,11.2181163],[-13.2565472,11.2180282],[-13.2568967,11.218017],[-13.2592222,11.2190511],[-13.2613277,11.2209401],[-13.261697,11.2214498],[-13.2620028,11.2221022],[-13.2622415,11.2227705],[-13.2623649,11.2231151],[-13.2624945,11.2233394],[-13.2627296,11.2234098],[-13.2629925,11.2234387],[-13.2636711,11.223444],[-13.2651525,11.2234211],[-13.2657391,11.223615],[-13.2660046,11.2237465],[-13.2662165,11.2239517],[-13.2662487,11.2245753],[-13.2661584,11.2250864],[-13.2655326,11.225575],[-13.2647896,11.2259722],[-13.2631919,11.226807],[-13.2628906,11.227072],[-13.2626814,11.2274351],[-13.2623139,11.2282454],[-13.2617801,11.2287426],[-13.2612606,11.2291853],[-13.2604873,11.2297607],[-13.2598311,11.2304297],[-13.2598114,11.2306473],[-13.259849,11.230842],[-13.2600313,11.2312288],[-13.2604659,11.23196],[-13.2610506,11.2324784],[-13.2616979,11.2328869],[-13.2621932,11.233749],[-13.2620752,11.2351486],[-13.2619867,11.2358327],[-13.2619679,11.2361747],[-13.2620117,11.2364885],[-13.2627082,11.2388738],[-13.2628262,11.2401681],[-13.2629458,11.2414976],[-13.2634195,11.2431572],[-13.2641479,11.2450286],[-13.264503,11.2475594],[-13.2642424,11.2489744],[-13.2638968,11.2508509],[-13.2638908,11.2521598],[-13.2643543,11.2529429],[-13.2650194,11.2534664],[-13.267211,11.2545564],[-13.2676005,11.2548685],[-13.2679953,11.2552349],[-13.2685715,11.2564837],[-13.2691451,11.2577998],[-13.2694995,11.2581936],[-13.2698895,11.2585463],[-13.2706964,11.258985],[-13.2729972,11.2594143],[-13.2739574,11.2596824],[-13.2748534,11.2601928],[-13.2756901,11.2614345],[-13.276028,11.2619922],[-13.2765538,11.2625393],[-13.2769454,11.2630918],[-13.2773101,11.2638125],[-13.2779433,11.2651803],[-13.2787049,11.267411],[-13.2795875,11.2697679],[-13.2800353,11.2707097],[-13.2806039,11.2716093],[-13.2807434,11.2720565],[-13.2807756,11.2725773],[-13.2807757,11.2739136],[-13.2810867,11.2759074],[-13.2812423,11.2770701],[-13.2812637,11.2774278],[-13.2811993,11.277712],[-13.2804215,11.2786851],[-13.2801908,11.2791849],[-13.2801319,11.2797426],[-13.2809903,11.2827991],[-13.2811457,11.2843931],[-13.2811832,11.2861712],[-13.2812263,11.2895906],[-13.2813442,11.2909269],[-13.2812584,11.2915686],[-13.2810707,11.292263],[-13.2801533,11.2937466],[-13.2796651,11.294441],[-13.2792522,11.2949985],[-13.2787639,11.2952563],[-13.2782811,11.2954194],[-13.277455,11.2953142],[-13.2767308,11.2950775],[-13.2760335,11.2946224],[-13.2756573,11.294429],[-13.2752288,11.2944843],[-13.2747674,11.2946435],[-13.2745823,11.2947277],[-13.2737643,11.2949723],[-13.2728362,11.2951196],[-13.2718975,11.2951037],[-13.2714844,11.2952458],[-13.2711142,11.2955246],[-13.2709479,11.2957771],[-13.2708299,11.296077],[-13.270981,11.2969378],[-13.2710767,11.297734],[-13.2711089,11.2986073],[-13.270964,11.2997172],[-13.2708223,11.3007722],[-13.2712656,11.303356],[-13.2714303,11.304387],[-13.2712656,11.3048466],[-13.2701382,11.3065235],[-13.2695302,11.3079272],[-13.2688335,11.3092563],[-13.2685421,11.3112934],[-13.2684028,11.3125852],[-13.2689095,11.3140137],[-13.2695175,11.3153676],[-13.2698849,11.316647],[-13.2702776,11.3186965],[-13.2701762,11.3197523],[-13.2699834,11.3200704],[-13.2694162,11.3210068],[-13.2690361,11.322162],[-13.2691375,11.323727],[-13.2696948,11.3271055],[-13.2700495,11.3280619],[-13.2704802,11.3285836],[-13.2718737,11.3297263],[-13.272431,11.3307572],[-13.2728111,11.331962],[-13.2730391,11.3324836],[-13.2735458,11.3330674],[-13.2741538,11.3335766],[-13.2758893,11.3346696],[-13.2762946,11.3350174],[-13.2773967,11.33657],[-13.2784228,11.3377747],[-13.2790815,11.338433],[-13.2796388,11.3386193],[-13.2802342,11.3385821],[-13.2808676,11.3384206],[-13.2822284,11.3374091],[-13.2828944,11.3372903],[-13.2838191,11.3380231],[-13.2841485,11.3386442],[-13.2839078,11.3396502],[-13.283777,11.3402617],[-13.2837261,11.3406561],[-13.2838191,11.3408798],[-13.2843132,11.3411655],[-13.2858079,11.3414263],[-13.28634,11.3417865],[-13.2872647,11.3424199],[-13.2879107,11.3430409],[-13.2893547,11.3449673],[-13.3053294,11.332763],[-13.3165885,11.3400251],[-13.3333774,11.351194],[-13.3526048,11.3469432],[-13.3776757,11.3465735],[-13.395772,11.3495306],[-13.4121718,11.3467584],[-13.4253671,11.3493458],[-13.4285801,11.3513708],[-13.4464794,11.3626523],[-13.4859015,11.3769502],[-13.5061619,11.368587],[-13.525356,11.3800863],[-13.5507613,11.3735221],[-13.5573461,11.3691097],[-13.5839565,11.3594379],[-13.6186604,11.3424504],[-13.6394539,11.3257218],[-13.6858396,11.3330407],[-13.7364905,11.3272902],[-13.7620826,11.3189255],[-13.795139,11.3152659],[-13.8175321,11.3053324],[-13.8166407,11.2866575],[-13.8324608,11.2708241],[-13.8395965,11.2667117]]]]}]}
