# Supplementary material
Source: ML conference proceedings conference paper supplement (https://proceedings.neurips.cc/paper_files/paper/2022/hash/9d3faa41886997cfc2128b930077fa49-Abstract.html)
Supplement: Supplementary file 1 [file 9d3faa41886997cfc2128b930077fa49-Supplemental-Conference.zip › code/ebola/map/geojson/koinadugu.geojson]

{"type":"GeometryCollection","geometries":[{"type":"MultiPolygon","coordinates":[[[[-12.1351196,9.590074],[-12.1314111,9.5812705],[-12.11615,9.5800164],[-12.1047042,9.5706112],[-12.0881714,9.5693571],[-12.0729104,9.5787624],[-12.0576493,9.566849],[-12.064644,9.553054],[-12.0608287,9.544275],[-12.0493829,9.543648],[-12.0398447,9.5273436],[-12.0131379,9.5392584],[-11.9991486,9.5285978],[-11.9889746,9.5141741],[-11.9842979,9.5098043],[-11.9711994,9.4976501],[-11.9489143,9.5248351],[-11.9279304,9.5329875],[-11.8929571,9.5329875],[-11.8738808,9.5166826],[-11.8687938,9.5010041],[-11.8687938,9.4796802],[-11.873388,9.4734494],[-11.8738808,9.472781],[-11.8738808,9.4621183],[-11.8601468,9.4480955],[-11.8376358,9.42511],[-11.8357282,9.4131912],[-11.8230106,9.395626],[-11.8230106,9.3667668],[-11.8280976,9.362375],[-11.8266285,9.3428714],[-11.8202813,9.2916249],[-11.8147442,9.246913],[-11.8161715,9.2398692],[-11.8179236,9.2312223],[-11.8096572,9.2086265],[-11.7740918,9.2036367],[-11.7534706,9.2079221],[-11.738276,9.2229205],[-11.7355627,9.2689832],[-11.7171079,9.2918667],[-11.7169416,9.2912457],[-11.716241,9.2888197],[-11.7158728,9.2873898],[-11.714994,9.2857256],[-11.7146615,9.2846827],[-11.714329,9.2832294],[-11.7137234,9.282034],[-11.7134384,9.2810729],[-11.713379,9.2801822],[-11.7135452,9.2791509],[-11.7133077,9.2781781],[-11.713189,9.2771116],[-11.7132602,9.2755763],[-11.7129634,9.2744863],[-11.712916,9.2733143],[-11.7127377,9.2714977],[-11.7126546,9.2706304],[-11.7129634,9.2702318],[-11.713474,9.2697748],[-11.7138184,9.2691771],[-11.7137709,9.2685793],[-11.713664,9.2681926],[-11.713379,9.2674424],[-11.7137353,9.2667627],[-11.7138184,9.2656727],[-11.7136878,9.2652039],[-11.7135215,9.2640201],[-11.713747,9.2628124],[-11.7137471,9.2611955],[-11.7136046,9.2571752],[-11.712999,9.2533895],[-11.7125596,9.2524166],[-11.7121202,9.2509633],[-11.7115621,9.2486307],[-11.7113483,9.2464038],[-11.7108258,9.2421841],[-11.7105052,9.2396173],[-11.7100301,9.2366517],[-11.7097808,9.2345536],[-11.7094364,9.2315411],[-11.709092,9.229068],[-11.7092464,9.2255162],[-11.7094958,9.2227733],[-11.7094364,9.2206283],[-11.709947,9.2182721],[-11.7094839,9.2139466],[-11.7102201,9.2107466],[-11.7095433,9.2098908],[-11.7094839,9.2080621],[-11.7093176,9.2055418],[-11.7086289,9.2039593],[-11.7080588,9.2021305],[-11.7076551,9.2005949],[-11.7087357,9.1993406],[-11.7091458,9.1979815],[-11.7092582,9.1972658],[-11.7088307,9.1952025],[-11.7073819,9.1946516],[-11.7061944,9.1930572],[-11.7073226,9.1907361],[-11.7071207,9.1890012],[-11.7072632,9.1877468],[-11.7072751,9.1853435],[-11.7073107,9.1828349],[-11.7079757,9.180584],[-11.7079876,9.1774422],[-11.7083201,9.1754843],[-11.7082948,9.1748476],[-11.7081538,9.1724245],[-11.7073819,9.1711466],[-11.7074888,9.1697633],[-11.7082132,9.1689661],[-11.7084863,9.1678874],[-11.7087001,9.1661876],[-11.7081301,9.1652731],[-11.7082875,9.1637501],[-11.7091632,9.1625062],[-11.7090326,9.1605367],[-11.7081182,9.1588015],[-11.7084388,9.1568671],[-11.7084745,9.1543347],[-11.7092107,9.1524588],[-11.7090682,9.1492932],[-11.7079638,9.1480974],[-11.7077331,9.1475817],[-11.7077382,9.1471477],[-11.7093532,9.1460925],[-11.710042,9.1448498],[-11.7102795,9.1432084],[-11.7101489,9.142282],[-11.7112414,9.1389523],[-11.7120252,9.1371233],[-11.7120965,9.1356694],[-11.712999,9.1345087],[-11.714139,9.1338287],[-11.7142934,9.133219],[-11.7138184,9.1320699],[-11.7127733,9.1306982],[-11.7128802,9.1288925],[-11.7128565,9.1276496],[-11.7135096,9.1260433],[-11.7135571,9.1240618],[-11.7142578,9.1215292],[-11.7148872,9.1198408],[-11.7158134,9.1175309],[-11.7159322,9.1163818],[-11.7161839,9.1152783],[-11.7168941,9.1144471],[-11.7171928,9.1138336],[-11.717381,9.1131924],[-11.6885952,9.0999787],[-11.6710513,9.085421],[-11.6477412,9.057464],[-11.6275134,9.0726682],[-11.5845371,9.1297655],[-11.5717131,9.1389692],[-11.5538325,9.1430095],[-11.5209715,9.167868],[-11.4986615,9.1821136],[-11.4833298,9.1829613],[-11.4537841,9.1699619],[-11.4532359,9.1689367],[-11.4439517,9.151573],[-11.4445948,9.1337398],[-11.4422331,9.1022337],[-11.4450681,9.0716482],[-11.4459703,9.0563049],[-11.4455047,9.0486963],[-11.4465597,9.0407253],[-11.4422522,9.027278],[-11.4423644,9.0268031],[-11.4423444,9.0264391],[-11.442136,9.0261779],[-11.4415951,9.026071],[-11.44095,9.0259286],[-11.4400604,9.0257109],[-11.4394514,9.0254656],[-11.4391789,9.0252004],[-11.4393191,9.0249036],[-11.4396637,9.0244802],[-11.439816,9.0240766],[-11.439844,9.0236175],[-11.4397599,9.022921],[-11.43982,9.0225015],[-11.4399482,9.0218525],[-11.4400764,9.0213104],[-11.4401926,9.0206891],[-11.4400083,9.0202379],[-11.4400564,9.0199134],[-11.4402327,9.0197512],[-11.4405573,9.0195691],[-11.4408097,9.0194544],[-11.4408818,9.019114],[-11.4408177,9.0186392],[-11.4408097,9.0181801],[-11.4408297,9.0177369],[-11.4404852,9.0173372],[-11.4399843,9.0171156],[-11.4398681,9.0168029],[-11.4396237,9.0164784],[-11.4391869,9.0160787],[-11.4386099,9.0158452],[-11.4382052,9.0157859],[-11.4377284,9.0157384],[-11.43748,9.0158769],[-11.4372676,9.0159283],[-11.4371274,9.0157977],[-11.4371033,9.0153941],[-11.4371875,9.0150617],[-11.4370031,9.0147965],[-11.4368469,9.0143493],[-11.4367988,9.0140842],[-11.4367828,9.0137913],[-11.4368108,9.0135381],[-11.4369711,9.0131898],[-11.4372395,9.0129405],[-11.437528,9.0127743],[-11.437488,9.0124814],[-11.4372476,9.0122084],[-11.4372115,9.0118245],[-11.4373758,9.0113733],[-11.4375761,9.0109341],[-11.4377204,9.0105937],[-11.4378606,9.0103602],[-11.438077,9.0101663],[-11.4383334,9.010103],[-11.4386981,9.0103048],[-11.4389585,9.0102771],[-11.4390306,9.0100951],[-11.4388784,9.0098655],[-11.4385819,9.0096716],[-11.4384176,9.0093629],[-11.4384016,9.0090266],[-11.438634,9.0086704],[-11.4390226,9.0084606],[-11.4395075,9.0085635],[-11.4397719,9.0088089],[-11.4399562,9.0086941],[-11.4400845,9.0083696],[-11.4399643,9.0081005],[-11.4397359,9.0078868],[-11.4395515,9.0076137],[-11.4396036,9.0073209],[-11.439808,9.0070359],[-11.4401462,9.0070066],[-11.4405549,9.0072678],[-11.4409396,9.007244],[-11.4413884,9.006785],[-11.4415406,9.0060647],[-11.4415086,9.0052574],[-11.4413804,9.0045134],[-11.4410518,9.0040859],[-11.4409236,9.003801],[-11.4410518,9.0032707],[-11.441196,9.0025583],[-11.4410037,9.0022892],[-11.4406431,9.0019805],[-11.4407473,9.0016243],[-11.4410919,9.0012444],[-11.4412361,9.0004291],[-11.4415246,9.0000809],[-11.4416608,8.9997089],[-11.4415647,8.9992656],[-11.4410999,8.999234],[-11.4406351,8.9995585],[-11.4404267,8.9991548],[-11.4406751,8.9987116],[-11.4414124,8.9982287],[-11.4419093,8.9978805],[-11.4420776,8.9975005],[-11.4416608,8.9969465],[-11.4418371,8.9965586],[-11.4422218,8.9966378],[-11.4428549,8.9970177],[-11.4431113,8.9968198],[-11.4433277,8.9961629],[-11.4431915,8.9957196],[-11.4427106,8.9951655],[-11.4420134,8.9949043],[-11.4419493,8.9946035],[-11.4420615,8.9940099],[-11.4424255,8.9936327],[-11.4425498,8.9928194],[-11.4427285,8.9921289],[-11.443078,8.9917069],[-11.4432062,8.9911008],[-11.4433654,8.9904486],[-11.4432062,8.9896929],[-11.443113,8.9892747],[-11.4432062,8.9889179],[-11.443245,8.9883233],[-11.4432411,8.9877517],[-11.4435091,8.9871762],[-11.444049,8.9864473],[-11.4445617,8.9858297],[-11.4453812,8.9855842],[-11.4462163,8.9858642],[-11.4475796,8.9861788],[-11.4487021,8.9861404],[-11.4497624,8.9862824],[-11.45031,8.9865241],[-11.450613,8.9869346],[-11.4508965,8.9873143],[-11.4512344,8.9876289],[-11.451918,8.9879282],[-11.452555,8.9882849],[-11.4531648,8.9884883],[-11.4536658,8.9884269],[-11.4535299,8.9878668],[-11.4534911,8.9872338],[-11.45386,8.9869154],[-11.4545397,8.9869499],[-11.4550951,8.9868617],[-11.455736,8.98662],[-11.4564856,8.9862709],[-11.4575382,8.9858565],[-11.4583033,8.9852581],[-11.4587966,8.9848668],[-11.458952,8.9843834],[-11.4585791,8.9841302],[-11.4580276,8.9842031],[-11.457511,8.9841801],[-11.4570138,8.9842453],[-11.4562526,8.9843412],[-11.4556739,8.9844141],[-11.4552233,8.9843565],[-11.4551418,8.9841532],[-11.4552932,8.9836123],[-11.4556622,8.9825688],[-11.4557326,8.9823943],[-11.4559846,8.9817708],[-11.456171,8.9809498],[-11.4563808,8.9802976],[-11.4564196,8.9796033],[-11.456474,8.9789511],[-11.4564817,8.9785636],[-11.4565517,8.977827],[-11.4565089,8.9772515],[-11.4565089,8.9766224],[-11.4566293,8.9760392],[-11.4567342,8.9753909],[-11.456909,8.9748691],[-11.4572585,8.9745737],[-11.4578334,8.974167],[-11.4580703,8.9738601],[-11.4582839,8.9734726],[-11.4582917,8.9730276],[-11.4581402,8.9727053],[-11.4576702,8.9722066],[-11.4572119,8.9717846],[-11.4567653,8.9715812],[-11.4563575,8.9716465],[-11.4564468,8.9711707],[-11.4567109,8.9708331],[-11.4573207,8.9703574],[-11.457612,8.9699584],[-11.4579732,8.9691911],[-11.4581519,8.9685466],[-11.457981,8.967856],[-11.457814,8.9671846],[-11.4575461,8.9663378],[-11.4571726,8.965627],[-11.4571762,8.9651773],[-11.4573959,8.9649033],[-11.4579781,8.964727],[-11.4581731,8.9645127],[-11.458489,8.9640515],[-11.458629,8.9637639],[-11.4587004,8.9633299],[-11.4589668,8.9630369],[-11.4594172,8.962676],[-11.4598704,8.9625567],[-11.4600572,8.9622067],[-11.4600681,8.9617564],[-11.460005,8.961344],[-11.4596836,8.9606794],[-11.4598297,8.9604065],[-11.4602492,8.9604449],[-11.4606414,8.9604027],[-11.4608279,8.960207],[-11.4608007,8.9597658],[-11.4604744,8.9595433],[-11.4601831,8.9594704],[-11.4598608,8.9594934],[-11.4596704,8.9592939],[-11.4599345,8.9590254],[-11.4605288,8.9588987],[-11.4615076,8.9586839],[-11.4619018,8.9584349],[-11.4622369,8.9578381],[-11.4629015,8.9579792],[-11.463632,8.9582342],[-11.4647526,8.9581582],[-11.465203,8.9580443],[-11.4658676,8.9574203],[-11.4665707,8.9566119],[-11.4666256,8.9559933],[-11.4663729,8.9549136],[-11.4661477,8.9538881],[-11.4664608,8.9532804],[-11.4668014,8.9523037],[-11.4669662,8.9516146],[-11.4670321,8.950817],[-11.4674715,8.9502039],[-11.4678505,8.9497752],[-11.467867,8.9491838],[-11.467499,8.9480823],[-11.4671694,8.9471219],[-11.4669222,8.9460422],[-11.4669167,8.9455593],[-11.4674825,8.9447562],[-11.4677846,8.9441051],[-11.4681032,8.9432206],[-11.4684382,8.9424122],[-11.4689106,8.9414463],[-11.4691029,8.9405293],[-11.4692677,8.9397045],[-11.4694434,8.9386139],[-11.4695862,8.9377023],[-11.4697395,8.93717],[-11.4701323,8.9363748],[-11.4704911,8.9352873],[-11.4711118,8.9353831],[-11.4714949,8.9356418],[-11.4719459,8.9359772],[-11.4721059,8.9356801],[-11.4721544,8.9350526],[-11.4723484,8.9345688],[-11.4726442,8.9339125],[-11.4731873,8.9335149],[-11.4738565,8.9330167],[-11.4742978,8.9324514],[-11.4745451,8.9318047],[-11.4746373,8.9311627],[-11.4744384,8.9307364],[-11.474099,8.930837],[-11.4735365,8.9311963],[-11.4725472,8.9312969],[-11.4723241,8.9311005],[-11.4722514,8.9306358],[-11.4724163,8.9296968],[-11.4723193,8.9290118],[-11.472169,8.9282836],[-11.4717228,8.9281447],[-11.4713252,8.9279627],[-11.4710439,8.9273447],[-11.4713252,8.9268225],[-11.471718,8.9263483],[-11.4720817,8.9265734],[-11.4724648,8.9263003],[-11.4726297,8.9256824],[-11.4731218,8.9247243],[-11.4733611,8.9246127],[-11.4739261,8.9238049],[-11.4745776,8.9228855],[-11.4750629,8.9225309],[-11.4758938,8.9220777],[-11.4764987,8.9216837],[-11.4770039,8.9218282],[-11.4774028,8.9224521],[-11.4778083,8.9229052],[-11.4783002,8.9233321],[-11.4793638,8.9236013],[-11.4799023,8.9242909],[-11.4804009,8.9252497],[-11.4808396,8.9261231],[-11.4811321,8.9271738],[-11.4814578,8.9286448],[-11.481737,8.929446],[-11.4819099,8.9300305],[-11.482435,8.9303063],[-11.4835784,8.9306281],[-11.4842166,8.9311469],[-11.484775,8.9311994],[-11.4849877,8.9309499],[-11.4849877,8.9300436],[-11.4855195,8.9296365],[-11.4866629,8.9290783],[-11.4870817,8.9284807],[-11.487095,8.9275022],[-11.4872944,8.9257619],[-11.4876002,8.9242186],[-11.4879724,8.9223798],[-11.4885175,8.9208103],[-11.4887103,8.9196807],[-11.4888965,8.9187942],[-11.4895147,8.9182951],[-11.490113,8.9176515],[-11.4902393,8.9169094],[-11.4902459,8.9156485],[-11.4899667,8.9149326],[-11.4893751,8.9144992],[-11.4894083,8.9140198],[-11.4900066,8.9133762],[-11.4901529,8.9129033],[-11.4900531,8.9119839],[-11.4901927,8.9114191],[-11.4907777,8.9109397],[-11.4913494,8.9104997],[-11.4910303,8.9099218],[-11.4907578,8.909114],[-11.4906381,8.9084835],[-11.4905584,8.90761],[-11.4908774,8.9068088],[-11.4907844,8.9060273],[-11.4910835,8.9048977],[-11.4914824,8.9040374],[-11.4917882,8.9035448],[-11.4924396,8.9034397],[-11.4930578,8.9038009],[-11.4935498,8.9040965],[-11.4934501,8.9046284],[-11.4936504,8.9051129],[-11.4941017,8.9054101],[-11.4947033,8.9054287],[-11.495237,8.9060387],[-11.4958752,8.9067348],[-11.4964601,8.9066823],[-11.497085,8.9057234],[-11.4975503,8.9052506],[-11.4980556,8.9054607],[-11.4981752,8.9063408],[-11.4987203,8.9078119],[-11.4994781,8.9092173],[-11.4998238,8.9098083],[-11.5008741,8.9110693],[-11.5015123,8.9120018],[-11.5019244,8.9120675],[-11.5028817,8.911437],[-11.5039187,8.9112794],[-11.5050488,8.9105833],[-11.5060991,8.9106621],[-11.5071362,8.9098609],[-11.5082264,8.9091122],[-11.5087582,8.9099791],[-11.5091703,8.9105964],[-11.5100079,8.9111875],[-11.5103137,8.9116997],[-11.5106062,8.9123827],[-11.5115103,8.9128162],[-11.511816,8.913381],[-11.5114039,8.9138538],[-11.5101807,8.914655],[-11.5096223,8.9159028],[-11.5092102,8.9172425],[-11.5089842,8.9191733],[-11.5089443,8.920513],[-11.5094229,8.9212748],[-11.5097287,8.9205918],[-11.5100345,8.9197118],[-11.5096356,8.9190419],[-11.509742,8.9183984],[-11.5107258,8.9177416],[-11.5119357,8.9168354],[-11.5136907,8.9159816],[-11.5152595,8.9148258],[-11.5168416,8.9137487],[-11.5181047,8.912895],[-11.5194475,8.912212],[-11.5199793,8.9121595],[-11.5201521,8.9131051],[-11.5197665,8.9140377],[-11.5194342,8.9152592],[-11.5193677,8.9162443],[-11.5199527,8.9169536],[-11.5205908,8.9174789],[-11.5207504,8.9165333],[-11.5206307,8.9157452],[-11.5217076,8.9149965],[-11.5225585,8.913775],[-11.5231582,8.9127109],[-11.5233462,8.9110763],[-11.5235718,8.9106119],[-11.5240607,8.9106305],[-11.5243427,8.9112435],[-11.5248128,8.9119493],[-11.5256024,8.9121165],[-11.5268434,8.9113178],[-11.5282536,8.9104633],[-11.528968,8.909516],[-11.5296073,8.9079185],[-11.5299269,8.9057452],[-11.5301714,8.9036275],[-11.530679,8.9019743],[-11.5315439,8.9008412],[-11.5328037,8.9002096],[-11.5338942,8.9003211],[-11.5342138,8.8992901],[-11.5349377,8.8980177],[-11.535859,8.8962065],[-11.5358778,8.8950827],[-11.535248,8.8938659],[-11.5353326,8.8931507],[-11.535906,8.8930857],[-11.5364513,8.8934108],[-11.5373256,8.8939031],[-11.5384819,8.8941446],[-11.5399485,8.8942189],[-11.5406442,8.8938938],[-11.5407852,8.8933922],[-11.5400425,8.8931322],[-11.5391682,8.892417],[-11.5382375,8.8917482],[-11.5379649,8.8911817],[-11.5379273,8.8901135],[-11.5382375,8.8896863],[-11.5387546,8.8897884],[-11.5395349,8.8901228],[-11.540569,8.8901971],[-11.5411989,8.8898256],[-11.5413117,8.8890825],[-11.5409732,8.8882652],[-11.5407006,8.887132],[-11.5408416,8.8865933],[-11.5418381,8.8858038],[-11.54275,8.8857388],[-11.5435491,8.8855809],[-11.5438218,8.8851815],[-11.5435773,8.884104],[-11.5437936,8.8833145],[-11.544461,8.8822649],[-11.5447283,8.8816864],[-11.5449875,8.8807138],[-11.5444201,8.8794362],[-11.5435981,8.8791316],[-11.5437865,8.878421],[-11.544403,8.8770674],[-11.5456359,8.8770167],[-11.547845,8.8767967],[-11.5487355,8.875054],[-11.548941,8.8733282],[-11.5497801,8.8719747],[-11.5504822,8.8705872],[-11.5515782,8.8675417],[-11.5524173,8.8660189],[-11.5525885,8.8646822],[-11.5521262,8.8637008],[-11.5508247,8.8629225],[-11.5503794,8.862398],[-11.5508418,8.8613659],[-11.5513555,8.8603337],[-11.5520919,8.8596908],[-11.5524858,8.860283],[-11.5535817,8.8607567],[-11.554301,8.8610444],[-11.554712,8.8608413],[-11.5553113,8.8602322],[-11.5560477,8.8599446],[-11.5580341,8.8605875],[-11.5594726,8.8605706],[-11.559935,8.8599953],[-11.5597808,8.8588109],[-11.5588219,8.8581504],[-11.5428599,8.853035],[-11.4862758,8.846316],[-11.479631,8.8618042],[-11.4624226,8.8666862],[-11.438888,8.8529553],[-11.4222899,8.8186063],[-11.4114425,8.7938589],[-11.4010923,8.775392],[-11.3964761,8.7657799],[-11.3942343,8.7587117],[-11.3947672,8.7571121],[-11.3949116,8.7566785],[-11.3959239,8.7536396],[-11.395972,8.7534957],[-11.3958209,8.7531421],[-11.3934237,8.7475306],[-11.3819291,8.7278002],[-11.3814427,8.7142602],[-11.3780417,8.7015919],[-11.3754352,8.686064],[-11.3721912,8.6839934],[-11.3662961,8.6708523],[-11.3582031,8.6610311],[-11.357487,8.6619235],[-11.3544244,8.6607309],[-11.3488848,8.6602907],[-11.3422866,8.6597663],[-11.3389881,8.6626422],[-11.341118,8.6839674],[-11.3446614,8.7036443],[-11.3490912,8.716118],[-11.3470916,8.7349683],[-11.3506919,8.7569871],[-11.3508787,8.7717631],[-11.3510057,8.7837975],[-11.3510392,8.7844466],[-11.3307973,8.800332],[-11.3274225,8.8029805],[-11.3248289,8.8067085],[-11.3174039,8.8173811],[-11.3159615,8.8194544],[-11.3041531,8.8427911],[-11.2916502,8.8647538],[-11.2895284,8.8726628],[-11.2840095,8.8932346],[-11.2732431,8.91142],[-11.2551832,8.9223994],[-11.2439003,8.9239818],[-11.2402248,8.9245156],[-11.1933631,8.9313199],[-11.1652314,8.9450434],[-11.1471716,8.9639122],[-11.1374471,8.9800358],[-11.1370998,8.9944435],[-11.1482135,9.017769],[-11.138489,9.0311463],[-11.122513,9.0311463],[-11.0690282,9.0723038],[-11.0643969,9.0689817],[-11.0612145,9.0666988],[-11.0577022,9.0641793],[-11.0322139,9.0458949],[-11.0044296,9.0551554],[-10.9728249,9.0517256],[-10.9405256,9.0088506],[-10.9026694,8.974204],[-10.8957021,8.9712843],[-10.8916176,8.9695727],[-10.8912084,8.9694012],[-10.8908311,8.9680969],[-10.8849569,8.9477879],[-10.8714121,8.9467587],[-10.8495319,8.9285752],[-10.8266098,8.9172528],[-10.796047,8.9302906],[-10.7828495,8.924458],[-10.760622,8.931663],[-10.7196401,8.9374955],[-10.7064425,8.943328],[-10.7022749,8.9505325],[-10.7182509,8.9700873],[-10.7158198,8.9834663],[-10.7116521,8.9954726],[-10.6988018,9.0054204],[-10.6786293,9.0122692],[-10.6765744,9.0129669],[-10.6546942,9.0301173],[-10.6301333,9.0349086],[-10.6284196,9.0352429],[-10.6281246,9.0353005],[-10.6265626,9.0356052],[-10.6256215,9.0363023],[-10.624887,9.0368463],[-10.609892,9.0479528],[-10.5810795,9.0314671],[-10.5808609,9.0315157],[-10.5802834,9.0311735],[-10.5798984,9.0307362],[-10.5797602,9.0307122],[-10.5795459,9.0308839],[-10.5793882,9.031455],[-10.5795783,9.0318344],[-10.580108,9.0318544],[-10.5802643,9.0318137],[-10.5804679,9.0319583],[-10.5804153,9.0323536],[-10.5800959,9.0323297],[-10.5797521,9.0325174],[-10.5794488,9.0332203],[-10.5787533,9.0335478],[-10.5782883,9.034051],[-10.5784581,9.0343545],[-10.5789959,9.0344623],[-10.5791577,9.0348816],[-10.5787816,9.0358841],[-10.5784136,9.0361357],[-10.5782721,9.0367467],[-10.578082,9.0379807],[-10.5777262,9.0381764],[-10.5770994,9.0382843],[-10.5770953,9.0386836],[-10.5768365,9.0388354],[-10.5765939,9.0387435],[-10.5765049,9.0384879],[-10.5763715,9.0382603],[-10.5761491,9.0382483],[-10.5760277,9.038424],[-10.5762744,9.0386597],[-10.5763755,9.039071],[-10.5760156,9.0398378],[-10.5760439,9.0411677],[-10.5758417,9.0417308],[-10.5759514,9.0426673],[-10.5756926,9.0432164],[-10.5754095,9.04344],[-10.574991,9.0436637],[-10.5747099,9.043484],[-10.5743399,9.0434041],[-10.5742691,9.0435818],[-10.5741195,9.0438733],[-10.5738546,9.0439532],[-10.573798,9.044081],[-10.5738102,9.0443965],[-10.574069,9.0447459],[-10.574348,9.0451233],[-10.5743925,9.0454668],[-10.5745745,9.0462256],[-10.5745522,9.0466669],[-10.5745785,9.0471002],[-10.5744066,9.0472719],[-10.574073,9.04718],[-10.5738627,9.0470123],[-10.5737131,9.0470203],[-10.5735857,9.0472839],[-10.5737252,9.0475794],[-10.5739193,9.0477032],[-10.574168,9.0478709],[-10.5741236,9.0481005],[-10.5740245,9.0483262],[-10.5737475,9.0485318],[-10.573612,9.0487555],[-10.5735675,9.0489711],[-10.5735797,9.0491508],[-10.5735938,9.0493685],[-10.5735145,9.0494016],[-10.5734701,9.049529],[-10.5735071,9.049869],[-10.5736851,9.050114],[-10.5739001,9.050854],[-10.5738731,9.05122],[-10.5744131,9.051475],[-10.5747471,9.051845],[-10.5752131,9.052251],[-10.5758761,9.052646],[-10.5766241,9.052825],[-10.5776181,9.052825],[-10.5780901,9.05276],[-10.5786631,9.052872],[-10.5789381,9.0528],[-10.5791401,9.052609],[-10.5795221,9.052548],[-10.5799771,9.052548],[-10.5803851,9.052662],[-10.5809871,9.052385],[-10.5814261,9.052402],[-10.5818981,9.052646],[-10.5824031,9.05232],[-10.5831841,9.051897],[-10.5832981,9.051734],[-10.5835591,9.051767],[-10.5838191,9.052027],[-10.5839981,9.051978],[-10.5841431,9.051487],[-10.5844051,9.05157],[-10.5845131,9.051511],[-10.5846081,9.051296],[-10.5846681,9.051296],[-10.5848591,9.051463],[-10.5850141,9.051916],[-10.5852051,9.052084],[-10.5852651,9.052358],[-10.5855041,9.052609],[-10.5855271,9.052919],[-10.5858861,9.05317],[-10.5859331,9.053266],[-10.5858981,9.053373],[-10.5856951,9.053576],[-10.5856831,9.053779],[-10.5857901,9.05403],[-10.5859031,9.054615],[-10.5867211,9.054937],[-10.5868411,9.055594],[-10.5869481,9.055737],[-10.5869241,9.055928],[-10.5868411,9.056035],[-10.5868411,9.056143],[-10.5870431,9.056274],[-10.5874331,9.05639],[-10.5876941,9.056324],[-10.5879051,9.056438],[-10.5882471,9.056357],[-10.5883456,9.0564473],[-10.5884041,9.056501],[-10.5885121,9.056823],[-10.5887871,9.05711],[-10.5889301,9.057157],[-10.5890971,9.057122],[-10.5892401,9.057014],[-10.5894431,9.05699],[-10.5895391,9.057086],[-10.5895391,9.057181],[-10.5893121,9.057301],[-10.5892281,9.057408],[-10.5893241,9.057504],[-10.5895151,9.057527],[-10.5895741,9.057623],[-10.5895621,9.057718],[-10.589264,9.058017],[-10.5892881,9.05822],[-10.5895621,9.058184],[-10.5895741,9.058387],[-10.5894311,9.05853],[-10.5894311,9.058793],[-10.5892521,9.058972],[-10.5895271,9.059306],[-10.5895314,9.0593512],[-10.5895511,9.059557],[-10.5897891,9.059808],[-10.5897061,9.059963],[-10.5897541,9.060142],[-10.5903751,9.060488],[-10.5908521,9.0610525],[-10.5910432,9.0612052],[-10.5911244,9.0610912],[-10.5911957,9.060938],[-10.591299,9.0608926],[-10.5913884,9.061071],[-10.5915047,9.0611371],[-10.5916768,9.0611388],[-10.591717,9.0609813],[-10.5918067,9.0609301],[-10.591902,9.0608665],[-10.5919584,9.060983],[-10.5921633,9.061228],[-10.5923451,9.0615337],[-10.5926191,9.061503],[-10.5928341,9.0615269],[-10.5929949,9.0616825],[-10.5931773,9.0616432],[-10.593451,9.0616518],[-10.593713,9.0615551],[-10.5937914,9.0613192],[-10.5938981,9.0613633],[-10.5940467,9.0613731],[-10.5942421,9.06136],[-10.5942782,9.0614734],[-10.5945753,9.0616084],[-10.5946875,9.0614104],[-10.5949231,9.061467],[-10.5947752,9.0615559],[-10.5948055,9.0618124],[-10.595066,9.0616046],[-10.5951694,9.0616266],[-10.5952993,9.0617837],[-10.5955966,9.0618204],[-10.5959046,9.0620389],[-10.5962561,9.0622284],[-10.5963147,9.0625084],[-10.5963554,9.0623619],[-10.5966661,9.0625419],[-10.5970264,9.0626955],[-10.5969244,9.0628177],[-10.5967377,9.0626401],[-10.5966719,9.0629106],[-10.5965675,9.0630439],[-10.5963758,9.0631265],[-10.5966555,9.0632102],[-10.5967099,9.0633417],[-10.5968771,9.0634041],[-10.5969858,9.0632441],[-10.5971742,9.0633813],[-10.597132,9.0635875],[-10.5972193,9.0636635],[-10.5973005,9.0633837],[-10.5974621,9.0633795],[-10.5975893,9.0636019],[-10.5976314,9.0637609],[-10.5977919,9.0637662],[-10.5980331,9.0633556],[-10.5983844,9.0634364],[-10.5985693,9.0633213],[-10.5987968,9.0634379],[-10.598906,9.0636077],[-10.5989644,9.0638301],[-10.5990811,9.0635972],[-10.5992665,9.0636765],[-10.5994135,9.0641768],[-10.5994854,9.0642104],[-10.5995199,9.0641587],[-10.5996118,9.0639331],[-10.5997338,9.0640403],[-10.5997923,9.0640772],[-10.6000642,9.0640496],[-10.6002033,9.0639433],[-10.6005341,9.064057],[-10.6005805,9.0642874],[-10.6008201,9.064285],[-10.6008681,9.0644639],[-10.6010471,9.0645589],[-10.6011877,9.0648665],[-10.6015386,9.06483],[-10.6016249,9.0650464],[-10.6017799,9.06536],[-10.6020706,9.0655708],[-10.6022291,9.0650249],[-10.6023481,9.0650609],[-10.6024801,9.0651679],[-10.6028261,9.0653533],[-10.6029451,9.0653381],[-10.6032178,9.0654808],[-10.6033568,9.0653382],[-10.6035967,9.0654603],[-10.6037433,9.0653647],[-10.6038921,9.0653278],[-10.6041308,9.0659227],[-10.6040737,9.0661162],[-10.6042649,9.0663208],[-10.6044989,9.0663719],[-10.6046237,9.0663256],[-10.6046264,9.0661907],[-10.6047875,9.0662266],[-10.6049631,9.0664569],[-10.6050581,9.0666129],[-10.6051901,9.0666009],[-10.6052501,9.0664929],[-10.6054164,9.0667299],[-10.6054642,9.0663282],[-10.6058088,9.0664976],[-10.6057028,9.0668239],[-10.6058704,9.0670602],[-10.605948,9.0668971],[-10.6062213,9.0669311],[-10.6064509,9.06719],[-10.606601,9.0671198],[-10.6068478,9.0674948],[-10.6070786,9.0676579],[-10.6074921,9.0675459],[-10.6077301,9.0675909],[-10.6078551,9.0679309],[-10.6081611,9.068158],[-10.6086641,9.0683559],[-10.6088311,9.0683559],[-10.6088981,9.068044],[-10.6093621,9.067897],[-10.6095431,9.0677949],[-10.6102963,9.0680284],[-10.6104072,9.0679859],[-10.6106969,9.0681071],[-10.6108011,9.068308],[-10.6108388,9.0685056],[-10.6108906,9.0686352],[-10.6111103,9.0688633],[-10.6109681,9.0688809],[-10.61074,9.0690702],[-10.6108927,9.0693671],[-10.6110219,9.0691298],[-10.6111503,9.069128],[-10.6111577,9.0694882],[-10.6114061,9.0694039],[-10.6116376,9.0695683],[-10.6118016,9.0694651],[-10.6118851,9.0692877],[-10.6121096,9.069393],[-10.612383,9.069429],[-10.6125617,9.0693448],[-10.6127941,9.0689639],[-10.6128661,9.0690839],[-10.6130811,9.0691669],[-10.6133551,9.0691439],[-10.6133804,9.0692983],[-10.6133866,9.0696012],[-10.6134664,9.0696449],[-10.613686,9.0696328],[-10.613764,9.0696844],[-10.6137371,9.0698839],[-10.6136943,9.0700388],[-10.6136819,9.0702454],[-10.6138612,9.0702142],[-10.6140721,9.0703139],[-10.6143071,9.0705003],[-10.61452,9.0705406],[-10.6144665,9.070779],[-10.6145089,9.0709663],[-10.6145832,9.0712007],[-10.6149433,9.0712168],[-10.6151501,9.0714471],[-10.615387,9.0715228],[-10.61559,9.0717573],[-10.6157853,9.071706],[-10.6157084,9.0715509],[-10.6159352,9.0715069],[-10.6160378,9.0715905],[-10.6162065,9.0717252],[-10.6165326,9.0717261],[-10.6164942,9.0719128],[-10.6166112,9.0721752],[-10.6167032,9.0721442],[-10.6168241,9.0719887],[-10.6169611,9.072044],[-10.6171521,9.0722709],[-10.6173911,9.0724259],[-10.6175461,9.0724379],[-10.6188471,9.0731909],[-10.6190029,9.0732343],[-10.6194615,9.0735769],[-10.6198757,9.0738273],[-10.6199983,9.0738067],[-10.6201545,9.0736341],[-10.6203952,9.0735847],[-10.6208039,9.0736314],[-10.620856,9.0733682],[-10.6209644,9.0731845],[-10.6211131,9.0731936],[-10.6212538,9.0732743],[-10.6214929,9.0730075],[-10.6218529,9.0728918],[-10.6219674,9.0726254],[-10.6221061,9.0727129],[-10.6226155,9.0724166],[-10.6232297,9.072327],[-10.6234203,9.0721486],[-10.6236351,9.072068],[-10.6246731,9.0715189],[-10.6248401,9.0716149],[-10.6251621,9.0717099],[-10.6256281,9.0717099],[-10.6259151,9.0718889],[-10.6263091,9.0722709],[-10.6264881,9.0725699],[-10.6265951,9.0728679],[-10.6264641,9.0735129],[-10.6265241,9.0737159],[-10.6268821,9.0742769],[-10.6271451,9.0743489],[-10.6275781,9.0743359],[-10.6279291,9.0737679],[-10.6289721,9.0735979],[-10.6292441,9.0738249],[-10.6294731,9.0743249],[-10.6296631,9.0745039],[-10.6299621,9.0746229],[-10.6304041,9.0747069],[-10.6308201,9.0749019],[-10.6313641,9.0750609],[-10.6317941,9.0751629],[-10.6321701,9.0751839],[-10.6323261,9.0753159],[-10.6323621,9.0754949],[-10.6321581,9.0758529],[-10.6321941,9.0760319],[-10.6323041,9.0762279],[-10.6327471,9.0763529],[-10.6328371,9.0761369],[-10.6332571,9.0760079],[-10.6334721,9.0760439],[-10.6336271,9.0757809],[-10.6337701,9.0757569],[-10.6339491,9.0758999],[-10.6341641,9.0757339],[-10.6343191,9.0757449],[-10.6345101,9.0760319],[-10.6348441,9.0760079],[-10.6350951,9.0762939],[-10.6353221,9.0762939],[-10.6355251,9.0763539],[-10.6356451,9.0765099],[-10.6357161,9.0769269],[-10.6358591,9.0770109],[-10.6361221,9.0769749],[-10.6363131,9.0770109],[-10.6364561,9.0771419],[-10.6367311,9.0775239],[-10.6369821,9.0777149],[-10.6374951,9.0779659],[-10.6377701,9.0780849],[-10.6380681,9.0781329],[-10.6385461,9.0780619],[-10.6387121,9.0780849],[-10.6388842,9.0782836],[-10.6389401,9.0783479],[-10.6391431,9.0784789],[-10.6400971,9.0786339],[-10.6407781,9.0789089],[-10.6420081,9.0796139],[-10.6422221,9.0796849],[-10.6429631,9.0795179],[-10.6431421,9.0795769],[-10.6432611,9.0797089],[-10.6437151,9.0800069],[-10.6447061,9.0805209],[-10.6451471,9.0805089],[-10.6456731,9.0805799],[-10.6465801,9.0809499],[-10.6469861,9.0810219],[-10.6475591,9.0809739],[-10.6477021,9.0810219],[-10.6477741,9.0811539],[-10.6478341,9.0814999],[-10.6479531,9.0816669],[-10.6481441,9.0817619],[-10.6483351,9.0817619],[-10.6488761,9.0815779],[-10.6491371,9.0814079],[-10.6496361,9.0813399],[-10.6497151,9.0811249],[-10.6497261,9.0808639],[-10.6498621,9.0807399],[-10.6500781,9.0807059],[-10.6505201,9.0805239],[-10.6506641,9.0805419],[-10.6507351,9.0812839],[-10.6509281,9.0814429],[-10.6511101,9.0814759],[-10.6515521,9.0814079],[-10.6519711,9.0816689],[-10.6524581,9.0818729],[-10.6531611,9.0818959],[-10.6535581,9.0820319],[-10.6539431,9.0822919],[-10.6542601,9.0824399],[-10.6545891,9.0825299],[-10.6548271,9.0827229],[-10.6552411,9.0827319],[-10.6554741,9.0823489],[-10.6557341,9.0824059],[-10.6558141,9.0825189],[-10.6560401,9.0824399],[-10.6566411,9.0824059],[-10.6567091,9.0822239],[-10.6570381,9.0823369],[-10.6582391,9.0824739],[-10.6587491,9.0824169],[-10.6598381,9.0829039],[-10.6602571,9.0828819],[-10.6605181,9.0829499],[-10.6608011,9.0831429],[-10.6610841,9.0831759],[-10.6614021,9.0833689],[-10.6617071,9.0834709],[-10.6621501,9.0834709],[-10.6627621,9.0832219],[-10.6633741,9.0831649],[-10.6640431,9.0833579],[-10.6643601,9.0835619],[-10.6647001,9.0841629],[-10.6656051,9.0849039],[-10.6658871,9.0853429],[-10.6664211,9.0855939],[-10.6670801,9.0856869],[-10.6675501,9.0856869],[-10.6813501,9.0817039],[-10.6963898,9.080163],[-10.7007031,9.0786929],[-10.7055331,9.0795399],[-10.7137821,9.0803869],[-10.7224391,9.0774379],[-10.7240571,9.0784479],[-10.7260771,9.0800729],[-10.7275201,9.0801049],[-10.7289631,9.0803239],[-10.7297781,9.0807319],[-10.7304681,9.0811399],[-10.7307511,9.0817039],[-10.7308131,9.0824569],[-10.7307751,9.0833539],[-10.7308041,9.0842979],[-10.7302241,9.0862529],[-10.7298261,9.0867599],[-10.7284141,9.0879549],[-10.7279791,9.0886069],[-10.7276531,9.0907439],[-10.7272191,9.0922999],[-10.7269291,9.0945819],[-10.7269291,9.0966819],[-10.7272911,9.0989269],[-10.7270741,9.1003399],[-10.7267121,9.1014259],[-10.7262771,9.1040699],[-10.7259511,9.1047569],[-10.7254081,9.1053369],[-10.7254081,9.1056629],[-10.7258071,9.1067489],[-10.7257701,9.1072199],[-10.7223561,9.1114329],[-10.7233461,9.1124219],[-10.7236291,9.1130339],[-10.7237231,9.1142129],[-10.7236761,9.1154619],[-10.7231811,9.1166159],[-10.7222861,9.1179829],[-10.7219091,9.1189249],[-10.7212961,9.1200089],[-10.7200711,9.1217529],[-10.7199301,9.1230249],[-10.7197411,9.1240149],[-10.7196001,9.1251459],[-10.7190811,9.1275019],[-10.7189401,9.1285389],[-10.7187981,9.1288689],[-10.7182331,9.1295289],[-10.7196471,9.1307539],[-10.7205431,9.1314139],[-10.7209661,9.1324039],[-10.7209191,9.1335339],[-10.7205891,9.1346659],[-10.7199771,9.1356549],[-10.7193641,9.1370689],[-10.7171491,9.1365039],[-10.7154061,9.1364089],[-10.7143221,9.1369749],[-10.7138031,9.1374459],[-10.7136621,9.1382939],[-10.7140391,9.1387179],[-10.7148871,9.1394249],[-10.7149811,9.1403209],[-10.7145571,9.1418289],[-10.7138501,9.1430539],[-10.7133791,9.1445619],[-10.7149811,9.1447039],[-10.7161121,9.1455039],[-10.7162928,9.1469351],[-10.7162728,9.1472676],[-10.7163377,9.1475818],[-10.7164891,9.1486619],[-10.7166311,9.1499819],[-10.7160181,9.1509239],[-10.7147461,9.1519139],[-10.7130021,9.1523849],[-10.7117771,9.1526209],[-10.7114001,9.1553539],[-10.7114941,9.1564849],[-10.7111171,9.1571919],[-10.7105521,9.1576629],[-10.7088081,9.1580869],[-10.7077241,9.1580399],[-10.7082891,9.1590769],[-10.7093261,9.1599719],[-10.7094681,9.1608679],[-10.7093261,9.1622339],[-10.7088081,9.1627529],[-10.7079601,9.1633179],[-10.7092791,9.1637419],[-10.7102221,9.1641659],[-10.7106451,9.1646849],[-10.7109281,9.1657219],[-10.7115411,9.1662869],[-10.7122481,9.1663819],[-10.7132371,9.1663819],[-10.7144161,9.1665699],[-10.7149811,9.1669469],[-10.7158301,9.1686909],[-10.7158771,9.1695389],[-10.7154531,9.1706229],[-10.7155001,9.1724139],[-10.7154061,9.1734029],[-10.7149341,9.1741099],[-10.7141331,9.1754769],[-10.7153111,9.1764659],[-10.7161121,9.1767019],[-10.7170551,9.1767019],[-10.7177621,9.1762309],[-10.7184221,9.1756179],[-10.7192701,9.1753829],[-10.7200241,9.1756659],[-10.7206841,9.1763249],[-10.7211071,9.1776919],[-10.7231341,9.1787759],[-10.7226631,9.1803309],[-10.7223331,9.1820739],[-10.7221441,9.1825929],[-10.7218151,9.1845249],[-10.7217201,9.1858919],[-10.7218621,9.1871169],[-10.7214851,9.1879649],[-10.7206371,9.1888609],[-10.7202601,9.1897089],[-10.7195051,9.1909339],[-10.7187521,9.1913579],[-10.7174791,9.191547],[-10.7166311,9.1914999],[-10.7159241,9.193762],[-10.7158301,9.195128],[-10.7154061,9.196731],[-10.7150281,9.197768],[-10.7152641,9.198522],[-10.7153581,9.199228],[-10.7149341,9.200171],[-10.7138971,9.2012549],[-10.7131431,9.199558],[-10.7119651,9.197391],[-10.7099391,9.197344],[-10.7090901,9.196872],[-10.7079121,9.195883],[-10.7073941,9.194799],[-10.7070641,9.193291],[-10.7068281,9.192631],[-10.7067341,9.191736],[-10.7066871,9.1901329],[-10.7059331,9.1893319],[-10.7059331,9.1887659],[-10.7061691,9.1876829],[-10.7062161,9.1865039],[-10.7057921,9.1859859],[-10.7046611,9.1856089],[-10.7026341,9.1857029],[-10.7015031,9.1861269],[-10.6999951,9.1886719],[-10.6995711,9.1897089],[-10.6990531,9.1911699],[-10.6986751,9.191688],[-10.6980161,9.191924],[-10.6968851,9.191547],[-10.6962251,9.191594],[-10.6953301,9.191971],[-10.6938221,9.193291],[-10.6916071,9.193432],[-10.6902871,9.193432],[-10.6892031,9.193762],[-10.6882141,9.193432],[-10.6869881,9.192207],[-10.6866581,9.1914529],[-10.6858571,9.1911229],[-10.6847271,9.1912639],[-10.6838781,9.19216],[-10.6830771,9.193244],[-10.6824641,9.194846],[-10.6818991,9.195741],[-10.6812861,9.196401],[-10.6802021,9.196495],[-10.6790711,9.197155],[-10.6777521,9.19772],[-10.6766681,9.197768],[-10.6752071,9.197768],[-10.6740761,9.197485],[-10.6720021,9.198097],[-10.6702581,9.198757],[-10.6671951,9.1997],[-10.6656401,9.201114],[-10.6636141,9.2032819],[-10.6638961,9.204931],[-10.6640371,9.206392],[-10.6636141,9.207334],[-10.6618701,9.209879],[-10.6605031,9.210539],[-10.6586651,9.21068],[-10.6568741,9.211152],[-10.6564031,9.212424],[-10.6560261,9.213131],[-10.6557441,9.215628],[-10.6560731,9.21709],[-10.6566391,9.218833],[-10.6570161,9.2197759],[-10.6576281,9.2210009],[-10.6578171,9.2222729],[-10.6572991,9.2228859],[-10.6560261,9.2242059],[-10.6556971,9.2252899],[-10.6557911,9.2263729],[-10.6563561,9.2279759],[-10.6569691,9.2292949],[-10.6582411,9.2311799],[-10.6596551,9.2315569],[-10.6615871,9.2316989],[-10.6654991,9.2314159],[-10.6667241,9.2316989],[-10.6672421,9.2323109],[-10.6676671,9.2351389],[-10.6679961,9.2361759],[-10.6687981,9.2372599],[-10.6696461,9.2378249],[-10.6704471,9.2381079],[-10.6694101,9.2408409],[-10.6695521,9.2421139],[-10.6701641,9.2433859],[-10.6707301,9.2449409],[-10.6704941,9.2472499],[-10.6705411,9.2488059],[-10.6700231,9.2499839],[-10.6702111,9.2509729],[-10.6697871,9.2517739],[-10.6686091,9.2528579],[-10.6685621,9.2537059],[-10.6692221,9.2546019],[-10.6676671,9.2587489],[-10.6673371,9.2601629],[-10.6680911,9.2612469],[-10.6684681,9.2620949],[-10.6669131,9.2648279],[-10.6691751,9.2661009],[-10.6679961,9.2693059],[-10.6668181,9.2732639],[-10.6655461,9.2733579],[-10.6640851,9.2740179],[-10.6626241,9.2748659],[-10.6616341,9.2766569],[-10.6600791,9.2800029],[-10.6609741,9.2807569],[-10.6611161,9.2820769],[-10.6608801,9.2857999],[-10.6602201,9.2866009],[-10.6566861,9.2872599],[-10.6540471,9.2885329],[-10.6538581,9.2896169],[-10.6545181,9.2908419],[-10.6567331,9.2919259],[-10.6587601,9.2925389],[-10.6600791,9.2932459],[-10.6608331,9.2939049],[-10.6618701,9.2950839],[-10.6602201,9.2967799],[-10.6598441,9.2975339],[-10.6603621,9.2986649],[-10.6600321,9.299749],[-10.6591371,9.300739],[-10.6589481,9.301634],[-10.6596081,9.302718],[-10.6606451,9.303236],[-10.6642741,9.304226],[-10.6651691,9.3047439],[-10.6654521,9.3053099],[-10.6655461,9.3063469],[-10.6653101,9.3076189],[-10.6645561,9.3084199],[-10.6634251,9.3106829],[-10.6642261,9.3118599],[-10.6654991,9.3123789],[-10.6666301,9.3128969],[-10.6677141,9.3128029],[-10.6687981,9.313746],[-10.6697401,9.31417],[-10.6718141,9.314453],[-10.6733691,9.314358],[-10.6742641,9.31417],[-10.6758661,9.314688],[-10.6767151,9.31563],[-10.6780351,9.3165259],[-10.6797311,9.3170919],[-10.6813331,9.3177509],[-10.6820401,9.3184109],[-10.6821821,9.3201549],[-10.6829361,9.320814],[-10.6835481,9.3217099],[-10.6836431,9.323076],[-10.6835011,9.324113],[-10.6859991,9.324632],[-10.6887791,9.324679],[-10.6904281,9.325621],[-10.6925021,9.32614],[-10.6933501,9.326423],[-10.6951881,9.328119],[-10.6967901,9.329014],[-10.6980631,9.329297],[-10.6989581,9.329156],[-10.7015031,9.328072],[-10.7027761,9.327318],[-10.7035771,9.327271],[-10.7040951,9.327742],[-10.7051321,9.328307],[-10.7058391,9.329392],[-10.7063571,9.330617],[-10.7086191,9.332219],[-10.7077241,9.335188],[-10.7051791,9.337309],[-10.7033411,9.339759],[-10.7029171,9.341597],[-10.7042361,9.344519],[-10.7055091,9.345509],[-10.7078651,9.346593],[-10.7097031,9.348101],[-10.7104571,9.348949],[-10.7117771,9.349137],[-10.7141331,9.347959],[-10.7155001,9.347488],[-10.7165841,9.348336],[-10.7174321,9.34975],[-10.7182331,9.350504],[-10.7192701,9.351305],[-10.7193641,9.352672],[-10.7192231,9.354227],[-10.7188461,9.3557349],[-10.7181861,9.3571019],[-10.7183271,9.3609189],[-10.7171021,9.3615319],[-10.7167251,9.3620969],[-10.7168661,9.3629919],[-10.7179971,9.3638879],[-10.7190811,9.3649249],[-10.7193641,9.3661969],[-10.7198821,9.3671399],[-10.7215321,9.3695429],[-10.7230871,9.3705799],[-10.7247361,9.3732659],[-10.7255851,9.3753399],[-10.7264801,9.3764239],[-10.7272811,9.3771769],[-10.7278941,9.3772249],[-10.7290721,9.3770829],[-10.7296851,9.3775079],[-10.7301561,9.3784029],[-10.7310051,9.3792509],[-10.7315231,9.3795809],[-10.7327011,9.3795809],[-10.7343031,9.3793919],[-10.7357171,9.3786859],[-10.7363301,9.3777429],[-10.7371781,9.3761879],[-10.7376021,9.3758109],[-10.7383561,9.3757639],[-10.7408531,9.3761879],[-10.7412781,9.3768469],[-10.7412781,9.3778369],[-10.7416081,9.3816069],[-10.7420321,9.3822669],[-10.7427861,9.3830209],[-10.7436811,9.3836809],[-10.7447651,9.3840109],[-10.7462261,9.3835399],[-10.7477341,9.3833979],[-10.7501851,9.3838219],[-10.7533001,9.3847329],[-10.7554271,9.3850249],[-10.7566781,9.3851499],[-10.7579291,9.3857339],[-10.7613501,9.3855669],[-10.7618081,9.3848579],[-10.7627671,9.3825639],[-10.7630181,9.3815629],[-10.7628931,9.3805209],[-10.7625591,9.3798119],[-10.7635601,9.3793109],[-10.7648951,9.3788519],[-10.7661051,9.3787689],[-10.7678561,9.3793529],[-10.7686491,9.3791859],[-10.7695661,9.3781849],[-10.7706091,9.3783939],[-10.7714021,9.3787269],[-10.7719021,9.3793529],[-10.7735291,9.3806039],[-10.7733621,9.3812709],[-10.7735701,9.3818139],[-10.7741961,9.3821059],[-10.7749881,9.3821469],[-10.7757811,9.3819799],[-10.7762821,9.3831899],[-10.7770321,9.3842739],[-10.7779501,9.3848999],[-10.7788261,9.3859009],[-10.7794521,9.3862349],[-10.7810361,9.3863179],[-10.7823301,9.3857759],[-10.7829971,9.3857339],[-10.7836641,9.3863179],[-10.7842061,9.3874859],[-10.7851241,9.3883619],[-10.7860421,9.3887379],[-10.7873761,9.3885289],[-10.7888781,9.3878619],[-10.7898371,9.3871939],[-10.7906721,9.3871109],[-10.7915891,9.3872359],[-10.7919231,9.3877359],[-10.7928401,9.3881119],[-10.7953431,9.3886129],[-10.7965111,9.3892799],[-10.7977621,9.3893209],[-10.7989301,9.3884869],[-10.7999311,9.3867349],[-10.8011831,9.3852339],[-10.8024751,9.3843999],[-10.8035181,9.3833569],[-10.8040181,9.3825229],[-10.8042691,9.3815629],[-10.8043521,9.3799779],[-10.8040601,9.3770169],[-10.8040181,9.3745139],[-10.8047281,9.3736799],[-10.8061461,9.3736799],[-10.8069381,9.3746809],[-10.8078981,9.3752649],[-10.8089401,9.3760579],[-10.8097331,9.3769749],[-10.8109011,9.3778099],[-10.8108171,9.3796449],[-10.8116931,9.3823559],[-10.8119021,9.3838159],[-10.8128611,9.3856509],[-10.8146131,9.3857759],[-10.8155721,9.3859839],[-10.8161141,9.3870269],[-10.8159481,9.3876529],[-10.8151551,9.3881119],[-10.8149881,9.3902389],[-10.8144461,9.3909059],[-10.8136121,9.3910729],[-10.8125271,9.3907399],[-10.8101501,9.3901559],[-10.8094411,9.3921159],[-10.8091071,9.3927829],[-10.8084401,9.3937839],[-10.8089821,9.3947849],[-10.8092331,9.3959949],[-10.8082311,9.3963289],[-10.8077311,9.3969539],[-10.8071471,9.3979549],[-10.8061461,9.3986639],[-10.8040601,9.3995399],[-10.8036021,9.4025429],[-10.8061461,9.4042539],[-10.8053531,9.4051289],[-10.8035601,9.4055879],[-10.8028511,9.4060469],[-10.8032681,9.4080069],[-10.8021001,9.4085909],[-10.8017671,9.4091749],[-10.8022251,9.4102179],[-10.8024751,9.4125959],[-10.8041441,9.4152229],[-10.8051031,9.4155149],[-10.8063961,9.4160989],[-10.8068131,9.4170999],[-10.8076891,9.4181839],[-10.8091071,9.4192689],[-10.8104421,9.4201449],[-10.8124021,9.4208119],[-10.8160311,9.4216459],[-10.8163231,9.4237319],[-10.8163651,9.4261089],[-10.8162401,9.4274439],[-10.8166571,9.4287369],[-10.8174071,9.4296959],[-10.8198681,9.4312399],[-10.8211611,9.4301549],[-10.8225801,9.4303639],[-10.8233301,9.4303219],[-10.8243731,9.4299469],[-10.8263751,9.4311139],[-10.8275011,9.4339089],[-10.8290031,9.4347429],[-10.8301291,9.4349519],[-10.8318391,9.4349939],[-10.8330901,9.4355769],[-10.8348421,9.4369539],[-10.8355931,9.4382889],[-10.8365531,9.4394979],[-10.8374701,9.4398319],[-10.8390961,9.4391639],[-10.8400561,9.4389559],[-10.8411401,9.4393729],[-10.8420581,9.4392479],[-10.8425171,9.4397899],[-10.8435601,9.4427519],[-10.8422251,9.4449199],[-10.8416831,9.4465059],[-10.8419751,9.4489249],[-10.8425581,9.4505509],[-10.8436011,9.4513019],[-10.8443521,9.4525119],[-10.8455201,9.4536799],[-10.8468961,9.4547219],[-10.8481471,9.4555559],[-10.8492741,9.4559739],[-10.8501501,9.4560149],[-10.8519851,9.4552639],[-10.8506921,9.4581419],[-10.8492321,9.4595189],[-10.8474381,9.4628139],[-10.8441851,9.4634399],[-10.8396391,9.4640239],[-10.8382211,9.4650249],[-10.8376781,9.4666099],[-10.8378041,9.4688199],[-10.8380121,9.4701969],[-10.8400981,9.4740339],[-10.8404311,9.4760359],[-10.8400981,9.4770789],[-10.8406821,9.4784969],[-10.8408481,9.4800819],[-10.8407651,9.4808739],[-10.8423921,9.4835019],[-10.8408481,9.4861299],[-10.8407231,9.4870889],[-10.8409459,9.4875846],[-10.8410981,9.4879229],[-10.8416831,9.4888409],[-10.8423921,9.4891739],[-10.8433483,9.4892125],[-10.8434341,9.4892159],[-10.8436011,9.4908849],[-10.8438521,9.4913439],[-10.8445601,9.4915939],[-10.8471881,9.4923439],[-10.8475641,9.4933039],[-10.8477301,9.4946379],[-10.8476891,9.4958899],[-10.8474381,9.4969319],[-10.8482731,9.4978079],[-10.8485231,9.4990179],[-10.8479481,9.4996449],[-10.8466931,9.4994359],[-10.8450211,9.4990179],[-10.8415721,9.4986519],[-10.8393251,9.4993319],[-10.8372351,9.4994359],[-10.8379661,9.5000109],[-10.8353011,9.5013169],[-10.8343081,9.5023099],[-10.8342041,9.5038259],[-10.8338381,9.5044529],[-10.8331591,9.5047139],[-10.8318521,9.5045569],[-10.8306501,9.5040349],[-10.8279851,9.5075879],[-10.8223591,9.5134149],[-10.8240311,9.5160899],[-10.8258701,9.5169259],[-10.8280441,9.5176779],[-10.8299191,9.5184059],[-10.8325841,9.5184579],[-10.8334201,9.5186139],[-10.8340471,9.5182489],[-10.8340991,9.5170469],[-10.8351971,9.5165239],[-10.8363461,9.5163679],[-10.8386981,9.5169429],[-10.8414151,9.5182489],[-10.8422131,9.5189137],[-10.8432961,9.5198159],[-10.8449691,9.5212799],[-10.8476861,9.5225339],[-10.8505601,9.5233179],[-10.8520751,9.5238399],[-10.8532771,9.5257219],[-10.8542701,9.5268189],[-10.8554721,9.5273419],[-10.8584511,9.5279679],[-10.8600191,9.5286479],[-10.8609591,9.5297449],[-10.8612731,9.5315219],[-10.8617431,9.5326719],[-10.8630501,9.5341349],[-10.8654011,9.5355459],[-10.8660801,9.5367999],[-10.8670741,9.5394129],[-10.8677001,9.5405099],[-10.8678571,9.5416069],[-10.8649311,9.5427049],[-10.8636241,9.5437499],[-10.8631021,9.5446379],[-10.8631541,9.5461019],[-10.8640951,9.5480349],[-10.8662901,9.5505439],[-10.8667601,9.5519539],[-10.8666031,9.5536269],[-10.8666031,9.5563439],[-10.8661331,9.5582769],[-10.8661331,9.5591659],[-10.8671261,9.5601069],[-10.8686941,9.5614649],[-10.8687981,9.5621969],[-10.8675961,9.5639739],[-10.8687981,9.5656459],[-10.8701571,9.5673699],[-10.8706791,9.5686769],[-10.8709931,9.5700359],[-10.8712021,9.5712369],[-10.8717761,9.5722819],[-10.8727171,9.5734319],[-10.8750691,9.5769329],[-10.8759051,9.5785009],[-10.8768971,9.5792849],[-10.8783091,9.5798079],[-10.8810261,9.5818459],[-10.8830121,9.5820019],[-10.8843701,9.5825249],[-10.8856251,9.5837269],[-10.8863041,9.5851379],[-10.8863561,9.5860779],[-10.8862001,9.5872279],[-10.8858341,9.5885339],[-10.8851541,9.5891619],[-10.8823851,9.5906249],[-10.8810261,9.5915129],[-10.8819141,9.5927149],[-10.8826981,9.5938649],[-10.8839001,9.5950659],[-10.8867741,9.5977319],[-10.8880281,9.5986199],[-10.8899621,9.5995079],[-10.8927321,9.5975749],[-10.8939861,9.5965819],[-10.8952921,9.5964249],[-10.8963371,9.5961119],[-10.8971741,9.5952759],[-10.8980621,9.5940739],[-10.8989501,9.5948579],[-10.9001001,9.5953279],[-10.9011971,9.5954329],[-10.9029221,9.5950139],[-10.9040721,9.5951189],[-10.9053261,9.5954329],[-10.9065801,9.5960599],[-10.9072591,9.5965819],[-10.9074161,9.5971569],[-10.9067891,9.5990899],[-10.9076771,9.5996649],[-10.9089841,9.6002929],[-10.9109691,9.6017559],[-10.9105511,9.6025389],[-10.9093491,9.6036369],[-10.9090881,9.6048389],[-10.9090881,9.6057269],[-10.9097151,9.6063539],[-10.9108131,9.6069289],[-10.9112831,9.6115279],[-10.9118571,9.6134089],[-10.9126941,9.6153429],[-10.9128501,9.6171709],[-10.9124331,9.6184259],[-10.9131121,9.6196269],[-10.9132161,9.6210899],[-10.9135821,9.6223449],[-10.9141571,9.6230239],[-10.9149411,9.6232849],[-10.9160901,9.6225019],[-10.9168221,9.6221879],[-10.9180761,9.6222919],[-10.9191221,9.6230239],[-10.9194351,9.6240689],[-10.9193301,9.6252709],[-10.9194351,9.6265769],[-10.9192781,9.6279879],[-10.9176061,9.6313329],[-10.9158291,9.6324299],[-10.9152541,9.6334229],[-10.9154111,9.6345729],[-10.9163521,9.6358269],[-10.9179721,9.6367669],[-10.9203761,9.6374469],[-10.9216301,9.6377079],[-10.9224661,9.6387009],[-10.9242431,9.6391719],[-10.9234591,9.6405819],[-10.9218391,9.6417839],[-10.9207411,9.6432999],[-10.9200621,9.6454419],[-10.9198531,9.6464349],[-10.9204801,9.6485779],[-10.9203761,9.6501979],[-10.9198531,9.6516089],[-10.9183371,9.6529669],[-10.9178151,9.6542739],[-10.9178671,9.6548479],[-10.9192781,9.6552139],[-10.9214211,9.6553189],[-10.9231451,9.6556329],[-10.9265421,9.6556849],[-10.9315581,9.6560499],[-10.9324471,9.6565209],[-10.9338061,9.6583499],[-10.9362101,9.6578269],[-10.9374111,9.6569389],[-10.9387181,9.6563119],[-10.9395021,9.6563639],[-10.9422191,9.6577749],[-10.9432641,9.6578799],[-10.9444661,9.6575659],[-10.9452501,9.6568859],[-10.9456161,9.6557889],[-10.9457201,9.6543259],[-10.9459291,9.6533329],[-10.9465041,9.6533329],[-10.9474971,9.6534899],[-10.9488031,9.6531759],[-10.9506851,9.6522359],[-10.9512721,9.6521969],[-10.9514681,9.6521839],[-10.9518871,9.6528629],[-10.9526181,9.6535939],[-10.9554401,9.6544829],[-10.9569561,9.6553709],[-10.9580011,9.6566779],[-10.9587841,9.6580879],[-10.9607181,9.6606489],[-10.9639051,9.6639409],[-10.9639581,9.6651429],[-10.9633311,9.6664499],[-10.9641671,9.6675469],[-10.9644281,9.6690629],[-10.9642721,9.6705779],[-10.9646901,9.6734519],[-10.9655781,9.6759599],[-10.9653691,9.6773189],[-10.9655781,9.6800889],[-10.9663101,9.6815519],[-10.9671451,9.6840599],[-10.9673021,9.6856799],[-10.9670931,9.6877699],[-10.9682431,9.6900699],[-10.9689221,9.6920559],[-10.9706991,9.6963929],[-10.9715881,9.6979079],[-10.9725281,9.7001029],[-10.9726851,9.7021409],[-10.9727371,9.7033949],[-10.9734691,9.7042319],[-10.9749841,9.7048059],[-10.9769701,9.7059039],[-10.9782871,9.7070219],[-10.9790241,9.7080369],[-10.9791261,9.7088509],[-10.9787701,9.7112899],[-10.9782871,9.7124839],[-10.9771951,9.7136779],[-10.9769921,9.7145419],[-10.9772711,9.7155579],[-10.9778301,9.7167269],[-10.9778551,9.7184039],[-10.9772201,9.7224689],[-10.9777031,9.7239429],[-10.9788721,9.7250099],[-10.9805481,9.7258989],[-10.9834201,9.7269399],[-10.9872051,9.7275759],[-10.9873347,9.7276811],[-10.9881451,9.7283379],[-10.9894411,9.7292779],[-10.9899751,9.7302179],[-10.9899241,9.7311319],[-10.9894411,9.7325809],[-10.9913721,9.7354519],[-10.9915501,9.7362649],[-10.9909911,9.7379159],[-10.9903301,9.7394399],[-10.9901781,9.7415239],[-10.9901271,9.7429469],[-10.9904821,9.7442929],[-10.9935821,9.7469609],[-10.9916001,9.7499339],[-10.9915469,9.7501563],[-10.9913211,9.7511019],[-10.9917021,9.7518139],[-10.9929981,9.7526769],[-10.9953351,9.7533129],[-11.0001121,9.7544299],[-11.0024241,9.7554979],[-11.0033381,9.7569709],[-11.0043041,9.7590039],[-11.0055741,9.7603249],[-11.0097921,9.7627129],[-11.0108081,9.7639829],[-11.0111641,9.7656599],[-11.0114181,9.7671849],[-11.0114681,9.7710969],[-11.0121291,9.7716559],[-11.0133481,9.7718599],[-11.0141111,9.7725199],[-11.0145171,9.7735869],[-11.0148221,9.7757209],[-11.0152801,9.7769919],[-11.0157371,9.7776519],[-11.0213771,9.7806499],[-11.0229021,9.7817679],[-11.0241721,9.7840549],[-11.0251881,9.7846639],[-11.0267131,9.7853759],[-11.0269661,9.7859859],[-11.0269661,9.7876119],[-11.0278301,9.7881699],[-11.0302191,9.7883229],[-11.0316921,9.7881199],[-11.0329121,9.7891359],[-11.0339791,9.7892379],[-11.0343764,9.7890987],[-11.0349951,9.7888819],[-11.0359601,9.7880179],[-11.0375361,9.7872049],[-11.0385521,9.7871039],[-11.0390091,9.7874079],[-11.0392131,9.7881199],[-11.0393141,9.7894409],[-11.0400261,9.7933539],[-11.0401154,9.7940477],[-11.0402291,9.7949289],[-11.0405341,9.7957929],[-11.0417531,9.7971639],[-11.0414481,9.7981299],[-11.0417531,9.7988919],[-11.0428711,9.8001119],[-11.0441931,9.8010259],[-11.0459711,9.8013819],[-11.0457681,9.8027029],[-11.0460731,9.8054979],[-11.0458181,9.8073269],[-11.0460731,9.8081909],[-11.0465801,9.8089529],[-11.0459201,9.8105789],[-11.0448531,9.8118999],[-11.0443961,9.8126119],[-11.0451071,9.8140859],[-11.0430751,9.8154569],[-11.0432271,9.8180489],[-11.0439381,9.8184039],[-11.0462761,9.8188109],[-11.0480031,9.8188109],[-11.0501881,9.8186079],[-11.0518141,9.8189129],[-11.0535931,9.8189129],[-11.0553201,9.8187599],[-11.0563881,9.8182009],[-11.0572511,9.8173379],[-11.0580131,9.8163719],[-11.0580651,9.8147459],[-11.0583181,9.8137299],[-11.0595381,9.8132719],[-11.0605541,9.8133229],[-11.0614691,9.8138819],[-11.0618241,9.8146949],[-11.0619771,9.8158639],[-11.0624341,9.8174389],[-11.0635021,9.8189129],[-11.0637551,9.8194719],[-11.0640101,9.8203359],[-11.0637551,9.8214529],[-11.0633491,9.8236889],[-11.0634511,9.8261789],[-11.0637551,9.8279069],[-11.0645181,9.8292789],[-11.0654831,9.8303959],[-11.0668551,9.8314639],[-11.0684301,9.8316159],[-11.0699041,9.8314639],[-11.0707681,9.8314639],[-11.0714791,9.8327339],[-11.0719361,9.8336999],[-11.0739691,9.8355799],[-11.0743251,9.8366459],[-11.0745281,9.8380689],[-11.0749351,9.8392379],[-11.0761031,9.8405079],[-11.0775771,9.8417789],[-11.0791521,9.8427439],[-11.0801171,9.8435059],[-11.0810321,9.8443699],[-11.0833701,9.8453359],[-11.0842331,9.8454879],[-11.0850471,9.8452849],[-11.0861141,9.8448269],[-11.0872821,9.8442169],[-11.0887051,9.8437599],[-11.0901781,9.8435569],[-11.0914491,9.8440649],[-11.0921601,9.8448779],[-11.0918551,9.8470129],[-11.0924141,9.8477239],[-11.0943961,9.8489439],[-11.0943961,9.8495529],[-11.0940911,9.8507219],[-11.0940911,9.8518909],[-11.0943451,9.8527039],[-11.0951581,9.8543299],[-11.0958701,9.855041],[-11.0961751,9.8575819],[-11.0967341,9.8582929],[-11.0971121,9.8585591],[-11.0981051,9.8592579],[-11.1029331,9.8614939],[-11.1036951,9.8604779],[-11.1035931,9.8586999],[-11.1041521,9.8569719],[-11.1065401,9.855752],[-11.1079631,9.855397],[-11.1094881,9.8549399],[-11.1109101,9.8534659],[-11.1122321,9.8544819],[-11.1135021,9.855549],[-11.1148231,9.8558539],[-11.1179741,9.8569719],[-11.1191421,9.8572259],[-11.1209721,9.8571239],[-11.1228521,9.8574799],[-11.1244271,9.8579379],[-11.1323531,9.8550919],[-11.1338271,9.8550919],[-11.1345391,9.855803],[-11.1346911,9.8570229],[-11.1343861,9.8584459],[-11.1351991,9.8596649],[-11.1367741,9.8605289],[-11.1392141,9.8607319],[-11.1401281,9.8615449],[-11.1406871,9.8624089],[-11.1408401,9.8641369],[-11.1408901,9.8652539],[-11.1410941,9.8662709],[-11.1416531,9.8668299],[-11.1430751,9.8673379],[-11.1447521,9.8672869],[-11.1466831,9.8668299],[-11.1476481,9.8668799],[-11.1497321,9.8672869],[-11.1514601,9.8673889],[-11.1526791,9.8671349],[-11.1535431,9.8663219],[-11.1546101,9.8655089],[-11.1559311,9.8655089],[-11.1568961,9.8670839],[-11.1572521,9.8680999],[-11.1568461,9.8701329],[-11.1569471,9.8709459],[-11.1567441,9.8723679],[-11.1556261,9.8734859],[-11.1549661,9.8746549],[-11.1551691,9.8759249],[-11.1557281,9.8768399],[-11.1571001,9.8772969],[-11.1583191,9.8785169],[-11.1585731,9.8794319],[-11.1586241,9.881769],[-11.1603011,9.886545],[-11.1614191,9.890712],[-11.1607581,9.8931],[-11.1606061,9.894625],[-11.1605551,9.897877],[-11.1611651,9.906108],[-11.1615711,9.909463],[-11.1623341,9.910733],[-11.1638071,9.911647],[-11.1647221,9.912358],[-11.1653321,9.913578],[-11.1666021,9.914798],[-11.1670591,9.915966],[-11.1686851,9.917034],[-11.1681261,9.918151],[-11.1683801,9.918914],[-11.1689391,9.919523],[-11.1683301,9.920336],[-11.1679231,9.921403],[-11.1678221,9.922978],[-11.1683801,9.925164],[-11.1686341,9.927094],[-11.1689391,9.92872],[-11.1704641,9.930906],[-11.1705151,9.932227],[-11.1706161,9.932887],[-11.1700571,9.933395],[-11.1690411,9.933599],[-11.1681261,9.933548],[-11.1671611,9.934361],[-11.1654331,9.935377],[-11.1645691,9.936546],[-11.1640101,9.937714],[-11.1640611,9.938629],[-11.1648241,9.93934],[-11.1666021,9.940712],[-11.1673131,9.941627],[-11.1676181,9.94305],[-11.1680761,9.944117],[-11.1696511,9.947217],[-11.1706671,9.948894],[-11.1717341,9.95052],[-11.1729541,9.951434],[-11.1737661,9.952755],[-11.1742241,9.95433],[-11.1746301,9.956566],[-11.1744271,9.958243],[-11.1732581,9.958091],[-11.1718861,9.958853],[-11.1716331,9.959818],[-11.1718861,9.960631],[-11.1727501,9.961241],[-11.1773741,9.963223],[-11.1789501,9.963527],[-11.1797631,9.964036],[-11.1795081,9.965154],[-11.1795081,9.966323],[-11.1802711,9.967491],[-11.1856571,9.969473],[-11.1847931,9.971455],[-11.1869271,9.97181],[-11.1874512,9.972049],[-11.1903831,9.973386],[-11.1921611,9.97364],[-11.1931261,9.973183],[-11.1938381,9.97242],[-11.1946511,9.972217],[-11.1961251,9.972369],[-11.1987671,9.973233],[-11.2005451,9.973894],[-11.2009011,9.974351],[-11.2009521,9.975367],[-11.2022221,9.975469],[-11.2029841,9.975672],[-11.2038481,9.975367],[-11.2056271,9.973284],[-11.2065921,9.972776],[-11.2080661,9.973132],[-11.2091841,9.97303],[-11.2100981,9.973589],[-11.2109621,9.974046],[-11.2125371,9.974504],[-11.2131981,9.975012],[-11.2134521,9.976282],[-11.2140111,9.976892],[-11.2140111,9.977654],[-11.2138071,9.97989],[-11.2138071,9.981058],[-11.2143661,9.981414],[-11.2128421,9.983294],[-11.2121311,9.98426],[-11.2118771,9.985124],[-11.2118771,9.985886],[-11.2113181,9.987004],[-11.2110131,9.988274],[-11.2113181,9.989138],[-11.2109111,9.990306],[-11.2098951,9.990764],[-11.2096411,9.991475],[-11.2094371,9.992644],[-11.2096921,9.993101],[-11.2091841,9.995235],[-11.2085231,9.996658],[-11.2080711,9.999973],[-11.25047,9.9999697],[-11.2841765,9.9999671],[-11.3372351,9.999963],[-11.4138343,9.9999543],[-11.4747266,9.9999474],[-11.4830293,9.9999464],[-11.4903875,9.9999456],[-11.5001111,9.999944],[-11.6395181,9.999944],[-11.7501391,9.999944],[-11.7906591,9.999944],[-11.8390494,9.999944],[-11.894622,9.999944],[-11.8952064,9.9977349],[-11.8960269,9.9956996],[-11.8971724,9.993698],[-11.8971552,9.99296],[-11.8967073,9.9925698],[-11.8966212,9.9918234],[-11.8974113,9.9899118],[-11.8979655,9.9894801],[-11.8986536,9.9892281],[-11.8990373,9.9885803],[-11.8993355,9.9875621],[-11.8995529,9.9843767],[-11.9008401,9.9823657],[-11.9009711,9.9805945],[-11.9023617,9.9766745],[-11.9037884,9.9725078],[-11.9036026,9.9708315],[-11.9035904,9.9683401],[-11.9041641,9.9666478],[-11.9044178,9.9643819],[-11.9058397,9.9602012],[-11.9064629,9.9593746],[-11.9079592,9.9582979],[-11.9087647,9.9573941],[-11.908937,9.9569444],[-11.9088164,9.956427],[-11.9083689,9.9554132],[-11.9078001,9.9538058],[-11.9077054,9.9532629],[-11.9077743,9.9526945],[-11.9080585,9.9519651],[-11.9080499,9.9513967],[-11.9083577,9.9495106],[-11.9089486,9.9475201],[-11.9092725,9.9453087],[-11.9091695,9.9443982],[-11.9088394,9.9435675],[-11.9076934,9.9413461],[-11.9068845,9.9401818],[-11.9055779,9.9390022],[-11.9043961,9.9379014],[-11.9027124,9.936831],[-11.9023507,9.9363305],[-11.9019631,9.935126],[-11.9012224,9.9343963],[-11.8993448,9.9332936],[-11.8966922,9.9321399],[-11.8957277,9.9315205],[-11.894987,9.9305958],[-11.8941688,9.9292301],[-11.8939794,9.9282289],[-11.8941,9.9273466],[-11.8946512,9.9267444],[-11.8964425,9.9255567],[-11.8976655,9.9243265],[-11.8982425,9.923351],[-11.8985009,9.9227655],[-11.898587,9.9220444],[-11.8983028,9.9213489],[-11.8976397,9.9209585],[-11.8971574,9.9205513],[-11.8966665,9.9198303],[-11.8951242,9.9183736],[-11.8921449,9.9166998],[-11.8917229,9.9164452],[-11.8913698,9.9160889],[-11.8912234,9.9156138],[-11.891387,9.9151726],[-11.891845,9.914653],[-11.892616,9.9142969],[-11.8932471,9.9136041],[-11.8939794,9.9127208],[-11.8946425,9.911618],[-11.8964253,9.9088776],[-11.8972933,9.9072752],[-11.8975966,9.9061542],[-11.8977968,9.9049196],[-11.8980014,9.9042792],[-11.8983159,9.9039028],[-11.898699,9.9037108],[-11.8992273,9.9036454],[-11.8996894,9.9037787],[-11.9000722,9.9040651],[-11.9006885,9.9040587],[-11.9025574,9.9036515],[-11.9050518,9.9023946],[-11.9062349,9.9013269],[-11.9067,9.9007159],[-11.9072255,9.899575],[-11.9072167,9.8991124],[-11.9067,9.8978229],[-11.9066311,9.896932],[-11.9061315,9.8955237],[-11.9060626,9.8942764],[-11.9058488,9.8934631],[-11.9053995,9.8929783],[-11.9045555,9.8923929],[-11.9041507,9.8916802],[-11.9040329,9.8909785],[-11.904099,9.890153],[-11.9041076,9.889296],[-11.9038234,9.8886428],[-11.9031947,9.88793],[-11.9026349,9.887701],[-11.9017823,9.8878197],[-11.9009038,9.8880827],[-11.900232,9.8881253],[-11.8996894,9.8879555],[-11.899276,9.8872173],[-11.8987765,9.8857411],[-11.898122,9.8847738],[-11.8974588,9.8842987],[-11.896477,9.8841289],[-11.8953746,9.8840187],[-11.893904,9.8840194],[-11.8929631,9.8841289],[-11.8923086,9.884426],[-11.891344,9.8847229],[-11.8897937,9.8846126],[-11.8884158,9.8842054],[-11.8858428,9.8833175],[-11.8849105,9.8825593],[-11.8841698,9.8811085],[-11.8839373,9.8796576],[-11.8840926,9.8786505],[-11.8842192,9.8782045],[-11.8848072,9.8759412],[-11.8851097,9.8746994],[-11.8862412,9.8730967],[-11.8867512,9.8722697],[-11.8869189,9.8698171],[-11.8870755,9.8674892],[-11.8871609,9.8663129],[-11.8876247,9.865482],[-11.8896201,9.86462],[-11.8901665,9.8643674],[-11.8905322,9.8637368],[-11.8909536,9.8626174],[-11.8910361,9.8621343],[-11.8909341,9.861562],[-11.890695,9.8602188],[-11.8900948,9.8581553],[-11.8897755,9.8561536],[-11.8889319,9.8538895],[-11.8890521,9.8529733],[-11.889312,9.8520331],[-11.8900791,9.8503385],[-11.8911347,9.848694],[-11.8909348,9.8466343],[-11.8905738,9.8443098],[-11.8902987,9.8422121],[-11.8896942,9.8402335],[-11.8893937,9.838916],[-11.8893831,9.837631],[-11.8905484,9.836113],[-11.8827068,9.825965],[-11.8879973,9.8059148],[-11.8879973,9.781452],[-11.880265,9.7646076],[-11.888506,9.7436262],[-11.8730604,9.7227477],[-11.8741882,9.7222177],[-11.8748305,9.7218643],[-11.8752263,9.7213932],[-11.8753234,9.7207159],[-11.8751591,9.7194938],[-11.8748379,9.7176829],[-11.8738893,9.7159455],[-11.8737699,9.7151872],[-11.8738146,9.7141934],[-11.8741209,9.7135308],[-11.8747911,9.7127431],[-11.8756745,9.7121689],[-11.8764587,9.711683],[-11.8781766,9.7113002],[-11.8788061,9.711042],[-11.8793513,9.7105751],[-11.8799513,9.7093789],[-11.8804628,9.7080696],[-11.880982,9.7074224],[-11.8816461,9.7071063],[-11.8828524,9.7066398],[-11.8835166,9.7059174],[-11.8837379,9.7050595],[-11.8836948,9.7041529],[-11.8831968,9.7032797],[-11.8828676,9.7022886],[-11.8835811,9.7007499],[-11.8844079,9.6996958],[-11.8853368,9.6991593],[-11.8877789,9.7000671],[-11.8906047,9.6998845],[-11.8924133,9.699746],[-11.8936511,9.699293],[-11.8941517,9.697946],[-11.8959096,9.6976898],[-11.8977513,9.698846],[-11.8994347,9.6995077],[-11.9005816,9.6999586],[-11.9024396,9.6997633],[-11.9041139,9.6991593],[-11.9065048,9.6992805],[-11.9077098,9.7003535],[-11.9083394,9.7012345],[-11.9095008,9.7014359],[-11.9106692,9.7005155],[-11.9119028,9.7005474],[-11.9126765,9.7019441],[-11.9136539,9.7023957],[-11.915486,9.7018576],[-11.9166961,9.7003929],[-11.9217224,9.6985016],[-11.922615,9.6971325],[-11.9238915,9.6959907],[-11.932247,9.6957556],[-11.9366244,9.6949006],[-11.9386618,9.6950994],[-11.9410622,9.6952387],[-11.9437048,9.6947813],[-11.9528024,9.69329],[-11.9608108,9.6912817],[-11.9723896,9.6877621],[-11.9753751,9.6876827],[-11.9772713,9.6872054],[-11.979173,9.6826749],[-11.9797335,9.6819335],[-11.9804721,9.6817091],[-11.9816792,9.682104],[-11.9830475,9.6820523],[-11.9849984,9.6811787],[-11.9874982,9.6810048],[-11.9884347,9.680834],[-11.9909355,9.6810528],[-11.9921099,9.680908],[-11.9943782,9.679372],[-11.9947507,9.6792434],[-11.9972092,9.6783955],[-11.9986761,9.677459],[-12.0005297,9.6776608],[-12.0037371,9.6784561],[-12.0059964,9.6790527],[-12.0069848,9.6789533],[-12.0072053,9.6782932],[-12.0069445,9.6763284],[-12.0054517,9.6738427],[-12.0051693,9.6710787],[-12.0054383,9.6695197],[-12.0075698,9.6677975],[-12.0107974,9.6673402],[-12.0199959,9.6655703],[-12.0227796,9.6668828],[-12.0236268,9.66913],[-12.0245144,9.6706015],[-12.0250792,9.6711383],[-12.0258458,9.6711583],[-12.0275806,9.6706413],[-12.0282463,9.6701241],[-12.0286295,9.6697464],[-12.0289119,9.6690107],[-12.0285287,9.6686327],[-12.0274595,9.6687919],[-12.0266728,9.6689112],[-12.0262492,9.6687521],[-12.0260677,9.6683146],[-12.0260072,9.667042],[-12.0256239,9.6662267],[-12.0261484,9.6649739],[-12.0268947,9.6640391],[-12.0290697,9.6624603],[-12.0317159,9.6605393],[-12.0323614,9.6594654],[-12.0333095,9.6584114],[-12.0354107,9.6573267],[-12.036416,9.6583717],[-12.0368194,9.6593859],[-12.0372834,9.6599626],[-12.038292,9.6607778],[-12.0388165,9.6611359],[-12.0390182,9.6617126],[-12.0389577,9.6622296],[-12.0392603,9.6625478],[-12.0398856,9.6625875],[-12.0404504,9.6627665],[-12.0411564,9.6636812],[-12.041923,9.6641387],[-12.0429719,9.6643574],[-12.0442024,9.6636812],[-12.0484184,9.6604994],[-12.049171,9.6598804],[-12.0517065,9.6577949],[-12.0549945,9.6572779],[-12.0609655,9.6554882],[-12.0627205,9.6543546],[-12.0674117,9.6526816],[-12.0729742,9.6498429],[-12.0776206,9.648101],[-12.0799787,9.6467977],[-12.0819397,9.6457139],[-12.0880913,9.6437784],[-12.0931303,9.6414558],[-12.093392,9.6394557],[-12.0971877,9.6352621],[-12.1005252,9.633391],[-12.1043862,9.6290682],[-12.1072235,9.627222],[-12.1076583,9.6269391],[-12.1080491,9.624884],[-12.1085208,9.6224038],[-12.1088363,9.6207451],[-12.111912,9.61739],[-12.112406,9.6127077],[-12.1106938,9.6080995],[-12.1135628,9.6062745],[-12.1149973,9.6033089],[-12.1163856,9.5998869],[-12.1188844,9.5990656],[-12.1213832,9.5966474],[-12.1231879,9.594868],[-12.1261032,9.5940923],[-12.130866,9.5926222],[-12.1320781,9.591541],[-12.1335722,9.5906548],[-12.1351196,9.590074]]]]}]}
