# Supplementary material
Source: ML conference proceedings conference paper supplement (https://proceedings.neurips.cc/paper_files/paper/2022/hash/9d3faa41886997cfc2128b930077fa49-Abstract.html)
Supplement: Supplementary file 1 [file 9d3faa41886997cfc2128b930077fa49-Supplemental-Conference.zip › code/ebola/map/geojson/kouroussa.geojson]

{"type":"GeometryCollection","geometries":[{"type":"MultiPolygon","coordinates":[[[[-10.7047203,11.1348186],[-10.705238,11.1351922],[-10.7053453,11.1354054],[-10.7053802,11.1357003],[-10.7051365,11.1365298],[-10.7041892,11.1379897],[-10.7040552,11.1382925],[-10.7040043,11.1386267],[-10.7039961,11.1392214],[-10.7039264,11.1395503],[-10.7038219,11.1397912],[-10.7032746,11.1404267],[-10.7023761,11.1410609],[-10.701499,11.1414925],[-10.701247,11.1416584],[-10.7011638,11.1417926],[-10.701102,11.1419584],[-10.7011236,11.1422321],[-10.7013729,11.1432241],[-10.7013703,11.1438742],[-10.7012522,11.1445268],[-10.7012362,11.1450164],[-10.7013139,11.1455452],[-10.7015446,11.1462452],[-10.7016197,11.1465559],[-10.7016037,11.1467795],[-10.7008776,11.1482555],[-10.7000881,11.1493558],[-10.6994391,11.1497347],[-10.6982321,11.1505295],[-10.6972154,11.1514018],[-10.6967711,11.1516018],[-10.6962902,11.1516427],[-10.6955391,11.1517768],[-10.6946594,11.1519638],[-10.6942222,11.1520795],[-10.6939058,11.1520848],[-10.6936751,11.1520427],[-10.6932807,11.1518663],[-10.6929749,11.1516031],[-10.6926101,11.1513045],[-10.6924158,11.1512125],[-10.6922026,11.1511888],[-10.6919213,11.1512389],[-10.6915388,11.1515339],[-10.6910598,11.1521663],[-10.6909929,11.1523427],[-10.6910437,11.1525768],[-10.6911967,11.1527453],[-10.6913598,11.1528331],[-10.692002,11.1528907],[-10.6927553,11.1530412],[-10.6934745,11.1533851],[-10.6941283,11.1538769],[-10.6945139,11.1544726],[-10.6945601,11.1547452],[-10.6944717,11.1549927],[-10.6942635,11.1553069],[-10.6937769,11.1557031],[-10.693211,11.1560399],[-10.69235,11.1565768],[-10.6913763,11.1575031],[-10.6909419,11.1578558],[-10.6903756,11.1581727],[-10.6896143,11.158301],[-10.6876881,11.1584831],[-10.6853252,11.1590487],[-10.6840673,11.1591741],[-10.6827559,11.1592242],[-10.6819081,11.15909],[-10.6804839,11.1584241],[-10.6800682,11.1583137],[-10.6794915,11.1582136],[-10.6790597,11.1582742],[-10.6786238,11.1583754],[-10.678306,11.158415],[-10.6779519,11.1583688],[-10.6776211,11.1581882],[-10.6770694,11.157782],[-10.6767261,11.1572346],[-10.6764311,11.1562557],[-10.6761951,11.1558716],[-10.6757122,11.1554348],[-10.674921,11.15499],[-10.6746207,11.1549637],[-10.6742666,11.1550058],[-10.6738079,11.1551742],[-10.6729233,11.1557203],[-10.6726483,11.1557789],[-10.6724335,11.1556949],[-10.6712732,11.1545715],[-10.6708414,11.1543453],[-10.6704712,11.154269],[-10.6701762,11.1543084],[-10.6700126,11.1545506],[-10.6699178,11.1550381],[-10.6700072,11.1561136],[-10.6699374,11.1568952],[-10.6699455,11.1574188],[-10.6699026,11.1578215],[-10.6697926,11.1580768],[-10.6694655,11.1583873],[-10.6689906,11.158753],[-10.6683469,11.1592846],[-10.6679687,11.1596819],[-10.6678561,11.1598715],[-10.6677943,11.1601319],[-10.6680791,11.1617552],[-10.66834,11.1623447],[-10.6687102,11.1627791],[-10.6694958,11.1633965],[-10.6707882,11.1642471],[-10.6715522,11.1646277],[-10.6723182,11.1648427],[-10.6747004,11.164921],[-10.6750343,11.1650925],[-10.6752653,11.1654208],[-10.675275,11.1657891],[-10.6749901,11.1660851],[-10.6727199,11.1670982],[-10.6720606,11.1672897],[-10.6716123,11.1673211],[-10.6695373,11.1673006],[-10.6687871,11.1671138],[-10.6677845,11.1670823],[-10.6668567,11.1673816],[-10.6665834,11.16764],[-10.6665492,11.1678759],[-10.6666088,11.1682074],[-10.6668411,11.1685599],[-10.6683138,11.1714652],[-10.6685248,11.1722599],[-10.668646,11.173121],[-10.6688607,11.1734343],[-10.6698077,11.1740563],[-10.6707735,11.1743827],[-10.6719667,11.1745033],[-10.6725458,11.1746742],[-10.6732209,11.1750124],[-10.6734808,11.1753479],[-10.6739554,11.1756441],[-10.6744262,11.1756595],[-10.6750901,11.1754152],[-10.6753073,11.1753311],[-10.675597,11.1753178],[-10.6761168,11.1754886],[-10.6767074,11.1761441],[-10.6769514,11.1766573],[-10.6769783,11.1769178],[-10.6769422,11.1773025],[-10.6765948,11.1780939],[-10.6765465,11.1784308],[-10.676568,11.1787124],[-10.6766699,11.1796648],[-10.676576,11.1801991],[-10.6764525,11.1805964],[-10.6762836,11.1808358],[-10.6759454,11.1810148],[-10.6756667,11.1809962],[-10.6752885,11.1808858],[-10.6747548,11.1806936],[-10.6742452,11.1803412],[-10.6738971,11.1799685],[-10.6733767,11.1794121],[-10.6731911,11.1789991],[-10.6729845,11.1787176],[-10.6727512,11.1785807],[-10.6725151,11.1785571],[-10.67225,11.1786192],[-10.6702834,11.1796754],[-10.6698732,11.1797465],[-10.6695915,11.1797202],[-10.6692236,11.1795794],[-10.6689237,11.1793255],[-10.6688056,11.1791438],[-10.6687413,11.1788755],[-10.6687332,11.1784439],[-10.6687037,11.1782598],[-10.6686152,11.17809],[-10.6684652,11.1779591],[-10.6679647,11.1777043],[-10.6671668,11.1773835],[-10.6667296,11.177123],[-10.6662763,11.1768861],[-10.666043,11.1768547],[-10.6657307,11.1769003],[-10.6648211,11.1773369],[-10.66345,11.1778423],[-10.6632132,11.1778546],[-10.6629745,11.1778124],[-10.6624276,11.1774707],[-10.6613384,11.1764072],[-10.6610004,11.1762468],[-10.660582,11.1761362],[-10.6593705,11.1759423],[-10.6581836,11.1758512],[-10.6574916,11.1759796],[-10.6569637,11.1762416],[-10.6565136,11.1765209],[-10.6543229,11.1774717],[-10.6534312,11.1777019],[-10.6525112,11.1778176],[-10.651433,11.1778492],[-10.6508643,11.1779125],[-10.6503655,11.1780913],[-10.6491263,11.1788333],[-10.6484772,11.1791701],[-10.6479193,11.1793439],[-10.6473051,11.1794675],[-10.6469456,11.1794728],[-10.6465057,11.1794281],[-10.6461651,11.179386],[-10.6459747,11.179407],[-10.6458352,11.1794465],[-10.6454812,11.1795622],[-10.6451727,11.1796307],[-10.6450171,11.1796254],[-10.6448589,11.1795832],[-10.6445629,11.1793231],[-10.6441265,11.1788887],[-10.6433595,11.1781123],[-10.6427748,11.1773966],[-10.6423054,11.176773],[-10.6419165,11.17646],[-10.6415807,11.1762466],[-10.640966,11.1760083],[-10.6401999,11.1759231],[-10.6399558,11.1758626],[-10.6396929,11.1757283],[-10.639119,11.1751021],[-10.6383277,11.1741601],[-10.6377081,11.1736917],[-10.6368149,11.1731391],[-10.6358761,11.1723919],[-10.6356401,11.172334],[-10.6354068,11.1723812],[-10.6351895,11.1724761],[-10.6349775,11.1726471],[-10.6347496,11.1729207],[-10.6347201,11.1732496],[-10.6347549,11.1735734],[-10.6347604,11.173918],[-10.6347148,11.1743074],[-10.6347309,11.174618],[-10.6348006,11.1750468],[-10.6350607,11.1757127],[-10.6353022,11.1764809],[-10.6353934,11.1771703],[-10.635404,11.1780177],[-10.6353504,11.179399],[-10.6351815,11.180149],[-10.6351572,11.1804911],[-10.6352779,11.1807885],[-10.6357823,11.1811962],[-10.6366165,11.1814146],[-10.6373084,11.1814016],[-10.6380043,11.1812297],[-10.6400466,11.1809179],[-10.6411714,11.1808385],[-10.6419967,11.1809393],[-10.6424298,11.1810556],[-10.643263,11.1818225],[-10.6439548,11.1823789],[-10.6445075,11.1829697],[-10.6451243,11.1836908],[-10.6460525,11.1845958],[-10.646318,11.1850617],[-10.6465003,11.1857774],[-10.6465594,11.1863115],[-10.6466243,11.1867612],[-10.6468849,11.1876165],[-10.6475921,11.1892321],[-10.647584,11.189498],[-10.647525,11.1896769],[-10.6473695,11.1899059],[-10.6464655,11.1909687],[-10.6453029,11.191879],[-10.6443712,11.1923241],[-10.6433379,11.1929162],[-10.6427203,11.1933991],[-10.6415187,11.1947803],[-10.640985,11.1950994],[-10.6404413,11.195326],[-10.63976,11.1954628],[-10.6385368,11.1957207],[-10.6382097,11.1956392],[-10.6379951,11.195505],[-10.637751,11.1951812],[-10.6368579,11.1942156],[-10.6352534,11.1930769],[-10.633607,11.1915107],[-10.6321854,11.1904872],[-10.6320191,11.19019],[-10.6317134,11.1890269],[-10.6314183,11.1885691],[-10.6308603,11.1881481],[-10.6293584,11.1876428],[-10.6276632,11.1869429],[-10.6262792,11.1863851],[-10.6252627,11.1861588],[-10.6238329,11.1857274],[-10.6234039,11.1856379],[-10.6230444,11.1856432],[-10.6224651,11.185709],[-10.6219071,11.1859405],[-10.6212684,11.1863047],[-10.620625,11.1869062],[-10.6190641,11.188248],[-10.6183399,11.189269],[-10.6176264,11.1904162],[-10.6171596,11.1914003],[-10.6169666,11.192258],[-10.6166662,11.1947787],[-10.6166045,11.1965915],[-10.6164998,11.1979204],[-10.6163336,11.1986203],[-10.6161619,11.1991516],[-10.6155236,11.2002409],[-10.6153251,11.2009514],[-10.6152019,11.2018329],[-10.6151661,11.203504],[-10.614869,11.2041982],[-10.6145419,11.2046034],[-10.6139842,11.2049486],[-10.6123048,11.2058979],[-10.6114411,11.2060873],[-10.610717,11.2060558],[-10.6099499,11.205982],[-10.6086463,11.2060242],[-10.605991,11.206203],[-10.6048967,11.2064135],[-10.6040759,11.2066714],[-10.6033731,11.2069766],[-10.6027079,11.2071555],[-10.6021983,11.2071397],[-10.6015922,11.2069819],[-10.6003476,11.2062767],[-10.5998702,11.2059795],[-10.5995295,11.2058584],[-10.599103,11.2057742],[-10.598513,11.2057979],[-10.5978371,11.2059241],[-10.5969707,11.2063188],[-10.5963805,11.2064188],[-10.5956591,11.2063293],[-10.5949992,11.206011],[-10.594723,11.2056611],[-10.5944977,11.2053005],[-10.5936689,11.204406],[-10.5932907,11.2042114],[-10.592773,11.2038457],[-10.5921319,11.2031826],[-10.5906595,11.2012987],[-10.5897583,11.2000673],[-10.5895491,11.1993675],[-10.5894149,11.1987307],[-10.5891305,11.197702],[-10.5889079,11.1969837],[-10.5893424,11.1966811],[-10.5898199,11.1961996],[-10.590544,11.1958102],[-10.5912583,11.1953408],[-10.591346,11.1952076],[-10.5913864,11.1950156],[-10.5910403,11.194442],[-10.5908015,11.1934158],[-10.5905425,11.1933599],[-10.5899624,11.1935373],[-10.5896535,11.1934191],[-10.5894926,11.1932316],[-10.5894576,11.1929756],[-10.5895194,11.1926765],[-10.5897823,11.1921265],[-10.5897528,11.1916424],[-10.5900237,11.1911898],[-10.5896267,11.1903189],[-10.5896348,11.19009],[-10.5897635,11.1899532],[-10.5901068,11.1898505],[-10.5901766,11.1896664],[-10.590139,11.1890927],[-10.5900237,11.1889059],[-10.5896992,11.1888296],[-10.5895463,11.1887138],[-10.5895034,11.1885323],[-10.5895489,11.1884139],[-10.5898011,11.1882429],[-10.589852,11.1880929],[-10.5897126,11.1879087],[-10.5896696,11.1876429],[-10.5894229,11.1874035],[-10.5894068,11.1872693],[-10.5895141,11.1870641],[-10.5898869,11.1870062],[-10.5899985,11.1867739],[-10.5893719,11.1865036],[-10.5892351,11.1860129],[-10.5888516,11.1858485],[-10.5884332,11.1847064],[-10.5883527,11.1846222],[-10.5880362,11.1845169],[-10.5876607,11.1845537],[-10.5873978,11.1847907],[-10.5871403,11.1849275],[-10.5865073,11.184917],[-10.5852467,11.1849854],[-10.5842543,11.1844748],[-10.5835944,11.1842749],[-10.5834603,11.1841697],[-10.5831063,11.1842013],[-10.5827576,11.1841592],[-10.5824304,11.1838171],[-10.5818296,11.1834908],[-10.5815989,11.1834908],[-10.581454,11.183354],[-10.581336,11.1831224],[-10.5810785,11.1828488],[-10.5809337,11.1826067],[-10.5808854,11.1824015],[-10.5810088,11.182212],[-10.5809766,11.1819857],[-10.5808961,11.1818699],[-10.5809552,11.18167],[-10.580923,11.1814647],[-10.5807996,11.1812437],[-10.5807138,11.1807858],[-10.5806869,11.1801438],[-10.5805475,11.1798965],[-10.5801237,11.1794018],[-10.5797052,11.1787703],[-10.5796194,11.1783808],[-10.5793566,11.1780282],[-10.5788725,11.1773768],[-10.5788458,11.1773409],[-10.5788188,11.1773045],[-10.5785331,11.1767717],[-10.5782314,11.1763362],[-10.5780114,11.1761586],[-10.5778022,11.1759915],[-10.5776238,11.1757915],[-10.577479,11.1756428],[-10.5772403,11.1753363],[-10.576964,11.1749981],[-10.576673,11.1747126],[-10.5763806,11.1744166],[-10.5760615,11.1741324],[-10.5745769,11.1721707],[-10.5740082,11.1712077],[-10.5736488,11.1701551],[-10.5731419,11.1686157],[-10.57293,11.1682368],[-10.5724686,11.1676053],[-10.5715084,11.1669342],[-10.5693197,11.1656448],[-10.5664122,11.1635713],[-10.5645883,11.1621608],[-10.562464,11.1602451],[-10.5605221,11.1582241],[-10.5593956,11.1557821],[-10.5580866,11.1539294],[-10.5563271,11.1513716],[-10.5558121,11.1503716],[-10.5542886,11.1490137],[-10.553323,11.1476137],[-10.5520034,11.1462768],[-10.5491924,11.1451926],[-10.5477977,11.14494],[-10.5461454,11.1448136],[-10.5445147,11.1450031],[-10.5206537,11.1313183],[-10.5193877,11.1311815],[-10.5190659,11.1308236],[-10.5186474,11.1306867],[-10.5177033,11.1306867],[-10.5169952,11.1305078],[-10.5164695,11.1303077],[-10.5160296,11.1299182],[-10.5152249,11.1294972],[-10.5145168,11.129255],[-10.5130792,11.1284866],[-10.5123818,11.1281497],[-10.5116415,11.1279181],[-10.5105794,11.1273075],[-10.5099571,11.126918],[-10.5087876,11.1257811],[-10.5079186,11.1251073],[-10.5069852,11.1245178],[-10.5061483,11.1241704],[-10.505569,11.1239809],[-10.504657,11.1235283],[-10.5041421,11.1234651],[-10.5029619,11.1235177],[-10.5026186,11.1233493],[-10.5023396,11.1231598],[-10.5018301,11.1231216],[-10.5015847,11.1227716],[-10.5014707,11.1226979],[-10.5013419,11.1226018],[-10.5012078,11.1225584],[-10.501134,11.1224584],[-10.5009409,11.1224045],[-10.5008229,11.1222071],[-10.5006808,11.1221465],[-10.5005225,11.1221347],[-10.5002731,11.1219149],[-10.5002248,11.1218241],[-10.5000531,11.1218886],[-10.4999673,11.1218834],[-10.4998587,11.1217754],[-10.4996307,11.121711],[-10.4992203,11.1215202],[-10.4989574,11.1214873],[-10.4988649,11.1213978],[-10.4984036,11.1213386],[-10.4982386,11.1210833],[-10.4979489,11.1209859],[-10.4979141,11.1209517],[-10.4978363,11.1209675],[-10.4976123,11.1207872],[-10.4975412,11.1207714],[-10.4975546,11.1206582],[-10.4974903,11.1205648],[-10.4970383,11.1204635],[-10.4968023,11.1201858],[-10.4965998,11.1200226],[-10.4963611,11.1200121],[-10.496243,11.1199792],[-10.4960446,11.1197147],[-10.4955349,11.1193041],[-10.4951581,11.1190949],[-10.4948456,11.1189791],[-10.4943172,11.1189304],[-10.4941053,11.1188238],[-10.4940014,11.1187218],[-10.4939149,11.1186863],[-10.4937231,11.1183922],[-10.4935729,11.1182619],[-10.4934602,11.118004],[-10.4933396,11.1180566],[-10.4932564,11.1180395],[-10.493074,11.1179014],[-10.4929506,11.1178737],[-10.4927669,11.1177816],[-10.4926542,11.1176948],[-10.4924799,11.1174513],[-10.4922278,11.1172197],[-10.4919971,11.1171171],[-10.4916987,11.1171039],[-10.4915539,11.1170401],[-10.4915203,11.1169684],[-10.4913829,11.1168776],[-10.4912179,11.1168618],[-10.4911442,11.1167512],[-10.490892,11.1167302],[-10.4907687,11.1165696],[-10.4905501,11.1163709],[-10.4903154,11.1164696],[-10.4899962,11.1164828],[-10.4896877,11.1163486],[-10.4891969,11.1164907],[-10.4888053,11.1166749],[-10.4884298,11.1164117],[-10.4878987,11.1164328],[-10.487373,11.1166065],[-10.4870618,11.1165381],[-10.4858602,11.1160117],[-10.4856698,11.1156379],[-10.4856537,11.1154458],[-10.4852165,11.1148431],[-10.4851628,11.1146799],[-10.4846639,11.1143509],[-10.484393,11.114372],[-10.4841946,11.1144483],[-10.484039,11.1143667],[-10.4838512,11.1143352],[-10.4833389,11.1143799],[-10.4831485,11.1143115],[-10.482832,11.1141167],[-10.482663,11.113943],[-10.4824511,11.1137877],[-10.4821239,11.1136403],[-10.4806566,11.1125798],[-10.4798976,11.111877],[-10.4794389,11.111677],[-10.4784143,11.1110506],[-10.4770103,11.1108296],[-10.4764747,11.1109257],[-10.4758316,11.1111951],[-10.4753421,11.1113627],[-10.4750964,11.1115266],[-10.4748891,11.1118223],[-10.474643,11.1119957],[-10.474263,11.1121928],[-10.4732992,11.1126084],[-10.473006,11.1129014],[-10.4726857,11.1134262],[-10.4719691,11.1142349],[-10.4713164,11.1149167],[-10.4704756,11.1154479],[-10.4701339,11.1156137],[-10.4696483,11.1156947],[-10.4151679,11.1120113],[-10.4148246,11.1120113],[-10.4142238,11.1126535],[-10.413977,11.1127903],[-10.4135264,11.113243],[-10.4131187,11.1134852],[-10.4127968,11.1135483],[-10.4126037,11.1138326],[-10.4123677,11.1140852],[-10.4120566,11.1145379],[-10.4117454,11.115338],[-10.4113806,11.1165276],[-10.4112948,11.1170856],[-10.4111982,11.1173382],[-10.4109944,11.1182647],[-10.411048,11.1194859],[-10.4112841,11.1204017],[-10.411445,11.1207597],[-10.4115094,11.1209913],[-10.4114557,11.1212492],[-10.411504,11.1215703],[-10.4114021,11.1218545],[-10.4114075,11.1225177],[-10.4114504,11.1229283],[-10.4114933,11.1230494],[-10.4116006,11.1238494],[-10.4116542,11.1239705],[-10.4116435,11.1241547],[-10.4118688,11.1247179],[-10.4119332,11.1249811],[-10.4120887,11.1253811],[-10.4120619,11.1255706],[-10.4121048,11.1257128],[-10.4120941,11.1260444],[-10.4120297,11.1261707],[-10.4120458,11.1262865],[-10.4119654,11.1263444],[-10.4117454,11.126697],[-10.4116167,11.1272392],[-10.4116328,11.1274761],[-10.4117508,11.127755],[-10.4118152,11.1283393],[-10.4119171,11.1286972],[-10.4119439,11.1291657],[-10.4121263,11.1297762],[-10.4121102,11.1299447],[-10.4122497,11.1303131],[-10.4123248,11.1306605],[-10.4127486,11.1312763],[-10.41299,11.13145],[-10.4131777,11.131529],[-10.4132957,11.1314237],[-10.4134889,11.1313816],[-10.4141164,11.1314974],[-10.4148674,11.1318132],[-10.4152644,11.1321395],[-10.4156077,11.1326659],[-10.4161871,11.1331501],[-10.4164767,11.1338449],[-10.4173352,11.1352659],[-10.4180325,11.1359291],[-10.4182471,11.1362976],[-10.4186548,11.1365292],[-10.4191698,11.1374345],[-10.4194702,11.1377082],[-10.4197596,11.1380374],[-10.419971,11.1382779],[-10.4202105,11.1385503],[-10.4208542,11.1396661],[-10.4209186,11.1405714],[-10.4217769,11.1411925],[-10.4224635,11.1415925],[-10.4230965,11.1416241],[-10.4240085,11.1419504],[-10.4244698,11.1419188],[-10.4248495,11.1419786],[-10.4253389,11.1420557],[-10.4258431,11.1421399],[-10.4266049,11.1425715],[-10.4269589,11.1424031],[-10.4271842,11.1427925],[-10.4276456,11.1427083],[-10.4279567,11.1430978],[-10.4282356,11.143182],[-10.4294802,11.143182],[-10.4301239,11.1439189],[-10.4305853,11.1440873],[-10.4310466,11.1448557],[-10.4314114,11.1452873],[-10.43198,11.1460873],[-10.4319264,11.1465505],[-10.4322697,11.1470452],[-10.4326345,11.1478242],[-10.4328276,11.1486768],[-10.4332675,11.1489505],[-10.4334069,11.14954],[-10.4336537,11.1499505],[-10.4337717,11.1502453],[-10.4339112,11.1505189],[-10.4341901,11.1509611],[-10.4342867,11.1513926],[-10.4348661,11.1520874],[-10.4353596,11.1526558],[-10.4357244,11.1529084],[-10.4359819,11.1538137],[-10.4366471,11.1548242],[-10.4378701,11.1556452],[-10.4390074,11.1560873],[-10.4398443,11.1568452],[-10.4396726,11.1578346],[-10.4408957,11.1590557],[-10.4414107,11.1590346],[-10.4432346,11.1587188],[-10.4441572,11.1595188],[-10.4452623,11.1594346],[-10.445434,11.1592135],[-10.4457773,11.159203],[-10.4461957,11.1594977],[-10.4460455,11.1601504],[-10.4467965,11.1604872],[-10.4476334,11.160803],[-10.4480196,11.1604767],[-10.4489208,11.1608872],[-10.4496008,11.161178],[-10.4497577,11.1612451],[-10.4504765,11.161424],[-10.4511417,11.1619819],[-10.4518927,11.1622134],[-10.4526652,11.1626976],[-10.4529656,11.1630766],[-10.4534699,11.1636449],[-10.4537274,11.1636871],[-10.4545857,11.1641713],[-10.4554011,11.1649923],[-10.4562165,11.1656028],[-10.4568173,11.166508],[-10.4573752,11.1667606],[-10.4578902,11.1678553],[-10.4583622,11.1683184],[-10.4590274,11.168971],[-10.4597141,11.1694973],[-10.4635227,11.1705078],[-10.4637909,11.1704973],[-10.4641718,11.1707288],[-10.464558,11.1715261],[-10.4659796,11.1724498],[-10.4665375,11.173076],[-10.4672241,11.173476],[-10.4674763,11.1735076],[-10.4680181,11.1734444],[-10.469209,11.1735497],[-10.4694772,11.1736497],[-10.469563,11.1747496],[-10.4695523,11.175339],[-10.4698044,11.1758442],[-10.46974,11.1761231],[-10.4693699,11.1763652],[-10.4692733,11.1765494],[-10.4693484,11.1768704],[-10.4692358,11.1771704],[-10.4680663,11.178023],[-10.4680073,11.1784019],[-10.4681093,11.1787703],[-10.4679161,11.1799017],[-10.4677069,11.1802122],[-10.4671007,11.1804069],[-10.4666179,11.1815779],[-10.4666233,11.1819226],[-10.4665267,11.182112],[-10.4659823,11.1824304],[-10.4656282,11.1829225],[-10.4655263,11.1835645],[-10.4650301,11.1844591],[-10.4645205,11.1851538],[-10.4642147,11.1853116],[-10.4636836,11.1866352],[-10.4631472,11.1872114],[-10.4630774,11.1874666],[-10.463182,11.1879745],[-10.4633752,11.1882455],[-10.4633752,11.1884744],[-10.4631901,11.1889243],[-10.4630935,11.1890322],[-10.4626322,11.1893269],[-10.462077,11.1902242],[-10.4620636,11.1906873],[-10.4621896,11.1909451],[-10.4623988,11.1910398],[-10.4626456,11.1911004],[-10.4627395,11.1912714],[-10.4627368,11.1913766],[-10.4624257,11.191674],[-10.4624203,11.191866],[-10.4622138,11.192287],[-10.4622754,11.1928896],[-10.462085,11.1935237],[-10.4618061,11.1938789],[-10.4617605,11.1943078],[-10.4618812,11.1949419],[-10.4617953,11.1955655],[-10.4616505,11.1959707],[-10.4615834,11.1967863],[-10.4613662,11.1975047],[-10.461098,11.1978309],[-10.4611006,11.1979546],[-10.4612052,11.1982361],[-10.4611731,11.1984282],[-10.4607198,11.1988676],[-10.4604784,11.1990518],[-10.4603738,11.1992991],[-10.4603577,11.200191],[-10.4602316,11.2004778],[-10.4598963,11.2008041],[-10.4595747,11.2008405],[-10.4594323,11.2009514],[-10.4591855,11.2015145],[-10.4590219,11.2016013],[-10.4585794,11.2016908],[-10.4584104,11.2018618],[-10.4582468,11.2025196],[-10.4578042,11.202859],[-10.4575494,11.2035352],[-10.4567206,11.2041798],[-10.4561815,11.2044455],[-10.4557067,11.2053296],[-10.4550791,11.2058084],[-10.4541189,11.2072555],[-10.4537112,11.2075292],[-10.4533786,11.2082185],[-10.4533786,11.2094709],[-10.4531157,11.2098234],[-10.4525632,11.2100708],[-10.4523808,11.210418],[-10.4523647,11.2108706],[-10.4522252,11.2110969],[-10.4520214,11.21116],[-10.4517102,11.2110311],[-10.4514527,11.2108653],[-10.4511791,11.2108337],[-10.4509163,11.2109285],[-10.4508251,11.2110548],[-10.4508331,11.2114126],[-10.4507178,11.2116046],[-10.4501894,11.2118493],[-10.4497898,11.212344],[-10.4495592,11.2124596],[-10.4490603,11.2125175],[-10.4487009,11.2127753],[-10.4486458,11.2132925],[-10.4483817,11.2135752],[-10.4480411,11.2136988],[-10.4478694,11.2137067],[-10.4476816,11.2138541],[-10.447518,11.2141145],[-10.4469119,11.2143118],[-10.4465524,11.2145013],[-10.4466034,11.2146749],[-10.4464371,11.2149117],[-10.4463245,11.2150248],[-10.4460294,11.2150512],[-10.4459436,11.2152406],[-10.4457531,11.2154905],[-10.4456566,11.2157378],[-10.4455439,11.2158457],[-10.4452516,11.2159641],[-10.4449646,11.2161456],[-10.4443691,11.2163798],[-10.4440875,11.2163719],[-10.4438112,11.216685],[-10.443197,11.2171086],[-10.4430334,11.2172717],[-10.4427222,11.2175111],[-10.4422314,11.2180031],[-10.4419685,11.2179242],[-10.4413543,11.2182649],[-10.4411599,11.2182938],[-10.4407843,11.2182557],[-10.4404719,11.2182675],[-10.440445,11.2184056],[-10.4401487,11.2184793],[-10.4398791,11.2186424],[-10.4394795,11.2187424],[-10.4392032,11.2191134],[-10.4389725,11.2193581],[-10.4388384,11.2195712],[-10.4386051,11.2197053],[-10.437787,11.2198422],[-10.4374571,11.2199791],[-10.4372237,11.2202264],[-10.4369099,11.2204158],[-10.4366122,11.2206394],[-10.4359014,11.2207578],[-10.4354749,11.2209709],[-10.4352764,11.221163],[-10.4349546,11.2213603],[-10.4347802,11.2214155],[-10.4346837,11.2216575],[-10.4343725,11.2219522],[-10.4340829,11.2220048],[-10.4337932,11.2221626],[-10.4335679,11.2223836],[-10.4332675,11.2225204],[-10.4327632,11.2224573],[-10.432377,11.222552],[-10.4320551,11.2225731],[-10.431862,11.2226152],[-10.4315723,11.2228046],[-10.4314221,11.2230887],[-10.4307462,11.2236465],[-10.4303707,11.223878],[-10.4300488,11.2240359],[-10.4298772,11.2242042],[-10.4294373,11.2244358],[-10.4288901,11.224541],[-10.4285039,11.2244568],[-10.4283751,11.2247725],[-10.4280211,11.225004],[-10.4281713,11.2259091],[-10.4279567,11.2263721],[-10.4275705,11.2268772],[-10.4272915,11.2272561],[-10.4271199,11.2279927],[-10.4268194,11.2286662],[-10.4267551,11.2291714],[-10.4266692,11.2296975],[-10.4264761,11.2300764],[-10.4263259,11.2303921],[-10.4262401,11.2307288],[-10.4258324,11.2313602],[-10.4255105,11.2319706],[-10.4249848,11.2323915],[-10.424899,11.232623],[-10.425135,11.2325704],[-10.4252852,11.2327177],[-10.4257895,11.2325493],[-10.4259289,11.2321916],[-10.4260791,11.23196],[-10.4263581,11.2319916],[-10.4267658,11.2319811],[-10.427152,11.231939],[-10.4276777,11.2319285],[-10.428536,11.2320442],[-10.4293407,11.2324862],[-10.4303814,11.2324757],[-10.43095,11.2327072],[-10.4319371,11.2329703],[-10.43301,11.2329703],[-10.4338146,11.2332544],[-10.4340721,11.2334333],[-10.4344798,11.2336964],[-10.4353596,11.2338542],[-10.4361428,11.2338542],[-10.4368509,11.2339174],[-10.4374303,11.2338332],[-10.4379023,11.2341699],[-10.4381169,11.234675],[-10.4383637,11.2351591],[-10.4387177,11.2354748],[-10.439458,11.23558],[-10.4399837,11.2359799],[-10.4404236,11.2361904],[-10.4405738,11.2364219],[-10.4409922,11.2367902],[-10.4414321,11.2370112],[-10.4417647,11.2369691],[-10.4426552,11.2374006],[-10.4431487,11.2375584],[-10.4433418,11.2377163],[-10.4439856,11.2377478],[-10.4444255,11.2377583],[-10.4448224,11.2378531],[-10.4449404,11.2378846],[-10.4457773,11.2381898],[-10.4462601,11.2383687],[-10.4466141,11.2388001],[-10.4467322,11.2392211],[-10.4467858,11.2393999],[-10.4468287,11.2397156],[-10.4470326,11.2399892],[-10.4474403,11.2402628],[-10.4479231,11.240547],[-10.4483415,11.2409153],[-10.4486955,11.2412836],[-10.4491354,11.2419465],[-10.4493285,11.242378],[-10.4496826,11.242641],[-10.4497684,11.2430409],[-10.4499723,11.2433671],[-10.4502512,11.2435671],[-10.4505302,11.2437565],[-10.451131,11.2441248],[-10.4516674,11.2440406],[-10.452,11.2438406],[-10.4524828,11.2435776],[-10.4529549,11.2437565],[-10.4532982,11.2439669],[-10.4535021,11.2441353],[-10.4536844,11.2443668],[-10.468061,11.2684212],[-10.4679966,11.2687369],[-10.4678035,11.2692209],[-10.4677606,11.2695366],[-10.4676748,11.2699574],[-10.4675675,11.2702731],[-10.4675353,11.2707045],[-10.4673743,11.2709886],[-10.4671812,11.2712727],[-10.4670096,11.2716199],[-10.4669023,11.2717041],[-10.4667842,11.2718303],[-10.466634,11.2720723],[-10.4665053,11.2722828],[-10.4664517,11.2725037],[-10.4664838,11.2727142],[-10.4665911,11.2731035],[-10.4667628,11.2734928],[-10.4668486,11.2737032],[-10.4669774,11.2741346],[-10.4669774,11.2743977],[-10.4668486,11.2745029],[-10.4667628,11.2746397],[-10.4668057,11.2749869],[-10.4668915,11.2753551],[-10.4669666,11.2757971],[-10.4667413,11.2760706],[-10.466795,11.2763126],[-10.4669345,11.2768597],[-10.4670632,11.2771964],[-10.4672456,11.2776384],[-10.4675138,11.2776699],[-10.4676318,11.2779645],[-10.4679215,11.2782696],[-10.4682863,11.2785748],[-10.4684687,11.2789956],[-10.4686725,11.2793429],[-10.4686511,11.2800162],[-10.468694,11.2802793],[-10.4688871,11.280637],[-10.4691661,11.2810053],[-10.4691339,11.2813314],[-10.4694021,11.2814472],[-10.4695845,11.2816471],[-10.4697669,11.2818575],[-10.4699814,11.2820574],[-10.4701638,11.2822994],[-10.4701424,11.2825519],[-10.470078,11.2827834],[-10.4699063,11.2831517],[-10.4701102,11.2833305],[-10.4701424,11.2835304],[-10.4700244,11.2837198],[-10.4699278,11.2839618],[-10.4700029,11.2840986],[-10.4704213,11.284288],[-10.4702819,11.2846036],[-10.4700244,11.284793],[-10.4700136,11.2850771],[-10.470078,11.2854664],[-10.4700995,11.2858241],[-10.4699922,11.286003],[-10.4699707,11.286245],[-10.4700458,11.2863502],[-10.4701531,11.2866342],[-10.4702067,11.2869604],[-10.4704535,11.2869814],[-10.4708719,11.2869814],[-10.4706895,11.2873813],[-10.4703462,11.287518],[-10.4703891,11.2877916],[-10.4706037,11.2880862],[-10.4705286,11.2882861],[-10.4703999,11.2884123],[-10.4703784,11.2885702],[-10.4703677,11.2889489],[-10.4702282,11.289212],[-10.4701638,11.2894434],[-10.4701209,11.2896433],[-10.4700995,11.2898222],[-10.4699922,11.2900537],[-10.4699385,11.2903272],[-10.469842,11.2905902],[-10.469724,11.2907481],[-10.4696596,11.2909374],[-10.4695094,11.2912215],[-10.4694021,11.2913267],[-10.4692948,11.2914319],[-10.4693377,11.2915687],[-10.4693699,11.2917686],[-10.4692948,11.2919264],[-10.4691982,11.2920948],[-10.4691875,11.2924314],[-10.469048,11.292726],[-10.4689729,11.292968],[-10.4687798,11.2932731],[-10.4686511,11.293452],[-10.4685438,11.2938097],[-10.4684258,11.2940096],[-10.4682434,11.2941569],[-10.4680288,11.2942937],[-10.4678249,11.2944094],[-10.467546,11.2945462],[-10.467428,11.2947776],[-10.4673958,11.2949565],[-10.4674709,11.2952195],[-10.467664,11.2953879],[-10.4677606,11.2955509],[-10.4676426,11.2961506],[-10.4676265,11.2963032],[-10.4676479,11.2964873],[-10.4676747,11.2966346],[-10.4676962,11.2967872],[-10.4676855,11.296966],[-10.4677123,11.2972501],[-10.4677337,11.2974395],[-10.4676211,11.297613],[-10.4675299,11.2976814],[-10.4673851,11.2977656],[-10.4672617,11.2978077],[-10.467208,11.2978813],[-10.4671705,11.2979655],[-10.4671168,11.2980917],[-10.4671276,11.2982022],[-10.4671115,11.2983232],[-10.4671061,11.2984021],[-10.4671598,11.2985021],[-10.4673368,11.2987388],[-10.4674977,11.2990176],[-10.4673797,11.2991649],[-10.4673851,11.2992964],[-10.4674977,11.2995647],[-10.4675567,11.299733],[-10.4675353,11.2999697],[-10.4671866,11.3001065],[-10.466913,11.2997856],[-10.4668433,11.2998961],[-10.4668272,11.3002012],[-10.4669023,11.3003327],[-10.4669935,11.3003748],[-10.4668111,11.3005694],[-10.4666609,11.3006378],[-10.4667038,11.3008377],[-10.4666072,11.3008745],[-10.4665214,11.3009166],[-10.4665107,11.3010376],[-10.4665965,11.3011218],[-10.4667145,11.3012743],[-10.4667413,11.3014637],[-10.4666287,11.3016005],[-10.4664946,11.3015847],[-10.4663015,11.3018793],[-10.4661405,11.3020371],[-10.4659152,11.3025526],[-10.4656148,11.3029945],[-10.4652822,11.3030892],[-10.4648852,11.3030365],[-10.4645097,11.3029313],[-10.4642093,11.3030892],[-10.4640591,11.3033522],[-10.4640162,11.3036257],[-10.4639733,11.3037835],[-10.4638016,11.3038151],[-10.4634583,11.3036573],[-10.4633939,11.3038046],[-10.4633832,11.3041097],[-10.4633403,11.3045094],[-10.4630935,11.3046567],[-10.4630292,11.304783],[-10.4629111,11.3049513],[-10.462541,11.305117],[-10.4622486,11.3054484],[-10.4619938,11.3062059],[-10.4616907,11.3063716],[-10.461106,11.3063243],[-10.4608297,11.3065689],[-10.4607171,11.3068371],[-10.4605749,11.3068214],[-10.4601592,11.3067293],[-10.4591614,11.3071659],[-10.4586411,11.3078392],[-10.458582,11.3083126],[-10.4583299,11.3085967],[-10.4578471,11.3086756],[-10.4570434,11.3085819],[-10.4569835,11.3083231],[-10.4567851,11.3079918],[-10.4566,11.3078917],[-10.4562781,11.3078759],[-10.4558704,11.3080128],[-10.4552803,11.3083073],[-10.4540868,11.30912],[-10.4532338,11.3098723],[-10.4530568,11.3101247],[-10.4529924,11.3104115],[-10.4529441,11.3111899],[-10.4527725,11.3125156],[-10.4525472,11.3131362],[-10.452,11.3142461],[-10.4516486,11.3146853],[-10.451359,11.3150036],[-10.4507018,11.3156927],[-10.4503236,11.315953],[-10.4499857,11.3161267],[-10.4495002,11.3162344],[-10.4480625,11.3163897],[-10.4452221,11.3168051],[-10.4431916,11.3168447],[-10.4422153,11.3167709],[-10.4407937,11.3165237],[-10.4393829,11.3159504],[-10.4380418,11.3153035],[-10.4370011,11.3148773],[-10.4354991,11.3144565],[-10.4338093,11.3139411],[-10.4327525,11.3134729],[-10.4321356,11.3132729],[-10.4316367,11.3132624],[-10.4312504,11.3132888],[-10.4308427,11.3134886],[-10.4305155,11.3137174],[-10.4297216,11.3144328],[-10.4277019,11.3164949],[-10.4261033,11.3177598],[-10.4256151,11.3180886],[-10.4254274,11.3182385],[-10.4252074,11.3185253],[-10.4249097,11.3191065],[-10.4245074,11.3196587],[-10.4237671,11.3203873],[-10.4233272,11.3209501],[-10.4214228,11.3238983],[-10.4205538,11.3248084],[-10.4204197,11.3251055],[-10.420366,11.325379],[-10.4204331,11.3258892],[-10.4204894,11.3266019],[-10.4203607,11.3274067],[-10.4200817,11.3280117],[-10.4198028,11.3283377],[-10.4192932,11.3287217],[-10.4185743,11.3290742],[-10.4177267,11.3292635],[-10.4174612,11.3293818],[-10.417362,11.3294817],[-10.4172761,11.3296422],[-10.417193,11.3298499],[-10.4170884,11.3300998],[-10.4169489,11.330247],[-10.4166807,11.3304497],[-10.4164299,11.3305378],[-10.4161174,11.3305207],[-10.4157821,11.3303259],[-10.4153396,11.330042],[-10.4150097,11.3296645],[-10.4147602,11.3289137],[-10.4145832,11.3279065],[-10.4144303,11.3264205],[-10.414154,11.3242666],[-10.4139824,11.3227675],[-10.4139126,11.3225596],[-10.4137839,11.3224045],[-10.4132314,11.3219732],[-10.4129497,11.3215366],[-10.4128156,11.3210659],[-10.4129765,11.3193827],[-10.412947,11.319088],[-10.4128398,11.3187856],[-10.4126118,11.3184437],[-10.4124669,11.3181991],[-10.4124079,11.3179597],[-10.4124361,11.3176612],[-10.4125192,11.3174166],[-10.4125353,11.3172851],[-10.4125112,11.3171392],[-10.4123623,11.3167184],[-10.4122255,11.3164265],[-10.412027,11.3162845],[-10.4118581,11.316245],[-10.411563,11.3162344],[-10.4106243,11.3165133],[-10.4095085,11.316934],[-10.4087065,11.3170998],[-10.4079903,11.3171287],[-10.4074767,11.3171286],[-10.4070247,11.317013],[-10.4052706,11.3162924],[-10.4040743,11.3158373],[-10.4035244,11.3158216],[-10.4031355,11.315982],[-10.4024945,11.3166343],[-10.4021538,11.3172944],[-10.4017891,11.3179743],[-10.4016871,11.3185963],[-10.4014618,11.320574],[-10.4011775,11.3215418],[-10.400346,11.3227544],[-10.3991524,11.3239458],[-10.3989218,11.3243692],[-10.3987555,11.3249083],[-10.3987957,11.326026],[-10.3989781,11.3265021],[-10.3992866,11.3272332],[-10.3994341,11.3277145],[-10.3995092,11.328656],[-10.3994555,11.3298105],[-10.3991766,11.3314306],[-10.3993322,11.3343972],[-10.399241,11.3348232],[-10.3990264,11.3351388],[-10.3986133,11.3353334],[-10.397975,11.3351756],[-10.3975082,11.3348653],[-10.3966714,11.3341498],[-10.3959955,11.3333768],[-10.3955449,11.3326036],[-10.3951184,11.3321433],[-10.3938309,11.3313858],[-10.3930236,11.3309704],[-10.3919185,11.3306022],[-10.3909637,11.3302891],[-10.3906445,11.3300894],[-10.3902207,11.3297212],[-10.388394,11.3281274],[-10.3876404,11.3275199],[-10.3872649,11.3273331],[-10.3868009,11.3272674],[-10.3858809,11.3272227],[-10.3851325,11.3272778],[-10.3838022,11.3276803],[-10.3831799,11.328038],[-10.3826456,11.3285307],[-10.3824611,11.3289269],[-10.3823216,11.3293635],[-10.3822733,11.3309467],[-10.3821499,11.3325982],[-10.381769,11.3340132],[-10.381584,11.3345655],[-10.3812702,11.33496],[-10.3807364,11.3355226],[-10.3805916,11.3357884],[-10.380605,11.3361381],[-10.3806774,11.336459],[-10.3812849,11.3373584],[-10.3815598,11.3375819],[-10.3818522,11.3377424],[-10.3827776,11.3379317],[-10.385193,11.3382415],[-10.3865917,11.3385734],[-10.3879274,11.3389942],[-10.389408,11.3396042],[-10.3908081,11.3404353],[-10.3913392,11.3409508],[-10.3917254,11.3415714],[-10.3929378,11.3437278],[-10.3950031,11.3477461],[-10.3958594,11.3504182],[-10.3961752,11.3513279],[-10.396422,11.3516645],[-10.3970415,11.3520906],[-10.3976799,11.3523877],[-10.3979401,11.3526165],[-10.3981302,11.352987],[-10.3984095,11.3542521],[-10.3983961,11.3548544],[-10.3982861,11.3551831],[-10.3981305,11.3554908],[-10.3976316,11.3558537],[-10.3969264,11.3562338],[-10.395797,11.3564926],[-10.3948931,11.3564454],[-10.3934849,11.3563034],[-10.3897567,11.355567],[-10.3890647,11.3554145],[-10.3888152,11.3552751],[-10.3886623,11.35507],[-10.3883753,11.3548937],[-10.3878174,11.3547361],[-10.3871978,11.3546151],[-10.3867982,11.3546046],[-10.3863556,11.3547334],[-10.3860981,11.354907],[-10.3858996,11.354978],[-10.3857199,11.3549833],[-10.3853873,11.3548912],[-10.3843574,11.3544941],[-10.3839738,11.3542496],[-10.3837753,11.3540655],[-10.383601,11.3538341],[-10.383424,11.3537289],[-10.3831665,11.3535947],[-10.3828071,11.3535764],[-10.3818871,11.3536316],[-10.3802938,11.3538893],[-10.3783492,11.3540734],[-10.3773354,11.3540024],[-10.3769169,11.3540313],[-10.3767131,11.3540997],[-10.376351,11.3543732],[-10.3758226,11.3547018],[-10.3755088,11.3548097],[-10.3747658,11.354907],[-10.3744573,11.3548833],[-10.3739048,11.3547255],[-10.3734569,11.354381],[-10.3728802,11.3538025],[-10.3723518,11.3531082],[-10.372038,11.3528716],[-10.3716008,11.3526928],[-10.3703241,11.3523639],[-10.3687872,11.3521589],[-10.3680415,11.3521983],[-10.3671671,11.3524719],[-10.3664773,11.3528455],[-10.3650374,11.3536947],[-10.3644903,11.3537841],[-10.3640182,11.3536263],[-10.3635354,11.3532476],[-10.3634013,11.3526481],[-10.3632886,11.3513804],[-10.3626664,11.3496816],[-10.3621728,11.3483721],[-10.3608585,11.3454792],[-10.3599359,11.3433123],[-10.3598286,11.3430994],[-10.359791,11.3429547],[-10.3597964,11.3426996],[-10.3598634,11.3423893],[-10.3598769,11.3420159],[-10.3598232,11.3415451],[-10.359614,11.3409691],[-10.3592224,11.3406168],[-10.3587958,11.3404248],[-10.3584124,11.3404222],[-10.3579349,11.3406352],[-10.3567447,11.3416178],[-10.3560413,11.3425103],[-10.3538498,11.3437489],[-10.3509612,11.3447271],[-10.349207,11.3454951],[-10.3487027,11.3458001],[-10.3481261,11.3462997],[-10.3461466,11.3494792],[-10.3454922,11.3504496],[-10.3452105,11.3511332],[-10.3448243,11.3528006],[-10.3432793,11.3572394],[-10.3431345,11.3587122],[-10.3432471,11.3594431],[-10.3434617,11.3599218],[-10.3444515,11.3610235],[-10.3454063,11.3630195],[-10.3461492,11.3652546],[-10.3465516,11.3662014],[-10.3470826,11.3668481],[-10.3479625,11.3677317],[-10.3497327,11.3705296],[-10.3502101,11.3715761],[-10.3503281,11.3718233],[-10.350548,11.3720284],[-10.3508109,11.3722177],[-10.351181,11.3723913],[-10.351637,11.3725701],[-10.3519964,11.3728015],[-10.3524309,11.3731854],[-10.352828,11.3739059],[-10.3529888,11.3757203],[-10.3529836,11.3776451],[-10.3529245,11.3781158],[-10.3528387,11.3786365],[-10.3527179,11.3789914],[-10.3524926,11.3794542],[-10.3508324,11.3827673],[-10.3504837,11.3836455],[-10.3502585,11.3849551],[-10.3498722,11.3868639],[-10.3496361,11.3876738],[-10.3494385,11.3882741],[-10.3486196,11.3894409],[-10.3481823,11.3899088],[-10.3480402,11.3900692],[-10.3479008,11.3903295],[-10.3474636,11.3915917],[-10.3472489,11.3933191],[-10.3471954,11.394171],[-10.3475761,11.3958248],[-10.3478874,11.3970396],[-10.3479946,11.3974918],[-10.3479784,11.3978966],[-10.3477183,11.3983069],[-10.3471122,11.3987803],[-10.3465301,11.398959],[-10.3446473,11.3992061],[-10.3429146,11.3992325],[-10.3418791,11.3990536],[-10.3404899,11.3984595],[-10.3398247,11.3978443],[-10.3390038,11.3972342],[-10.3382796,11.3968503],[-10.3365792,11.3957645],[-10.3360641,11.3951202],[-10.3355921,11.3939948],[-10.3350771,11.3932691],[-10.3335698,11.3917179],[-10.3332049,11.3909185],[-10.331998,11.3874424],[-10.3316599,11.3867903],[-10.3312845,11.3864222],[-10.3305817,11.3860541],[-10.3297235,11.3858964],[-10.3275294,11.3858858],[-10.326789,11.3860488],[-10.32614,11.3863014],[-10.3252978,11.3869903],[-10.3247774,11.3876738],[-10.3242481,11.388549],[-10.3236885,11.3913708],[-10.3237475,11.3954147],[-10.3241874,11.3997688],[-10.3249867,11.4053956],[-10.3249706,11.4069309],[-10.3247881,11.4079432],[-10.32441,11.4089135],[-10.3237824,11.4100335],[-10.3233075,11.4112376],[-10.3231996,11.4118454],[-10.3228865,11.4131779],[-10.3228757,11.4137011],[-10.3229696,11.4145819],[-10.3231306,11.4159228],[-10.3230929,11.4164118],[-10.3229643,11.4169692],[-10.321253,11.4188674],[-10.3209418,11.4194931],[-10.3208132,11.4206815],[-10.3207487,11.4211784],[-10.3206253,11.4216123],[-10.3200513,11.4226954],[-10.3196704,11.4232265],[-10.319252,11.4235367],[-10.3188014,11.4235998],[-10.3184688,11.4234788],[-10.317868,11.4231357],[-10.3151053,11.4216175],[-10.3139573,11.4213467],[-10.313386,11.4210444],[-10.312871,11.4205185],[-10.3126264,11.4200212],[-10.3126002,11.4193932],[-10.3126645,11.418715],[-10.3131259,11.417311],[-10.3133082,11.4157441],[-10.31348,11.413525],[-10.313673,11.4117162],[-10.3139734,11.4100651],[-10.3145404,11.4080777],[-10.3146708,11.4070046],[-10.3147782,11.4056479],[-10.3148317,11.4042965],[-10.3148049,11.403371],[-10.3145742,11.4025822],[-10.3141022,11.4017146],[-10.3140003,11.4013359],[-10.3139627,11.4009416],[-10.3142777,11.3961828],[-10.3145154,11.3944046],[-10.3145904,11.3931415],[-10.3144278,11.3918048],[-10.3141776,11.3907134],[-10.3141151,11.3897323],[-10.3141881,11.3887834],[-10.3143328,11.3878316],[-10.3144348,11.3873793],[-10.3146386,11.3869272],[-10.3152019,11.3857018],[-10.3152609,11.3848131],[-10.3152072,11.3840873],[-10.3150785,11.3833985],[-10.3150597,11.3830907],[-10.3151053,11.3827831],[-10.3153253,11.3822573],[-10.3155775,11.3811291],[-10.3157437,11.3805612],[-10.316079,11.3799223],[-10.3169078,11.3786812],[-10.3173208,11.3781973],[-10.3178492,11.3778345],[-10.3184983,11.3775584],[-10.3189167,11.377327],[-10.3195846,11.3763935],[-10.320054,11.3756808],[-10.3204536,11.3752549],[-10.3212504,11.3748683],[-10.3227228,11.3745423],[-10.3253728,11.3738271],[-10.3264833,11.3733012],[-10.3272076,11.3728173],[-10.3292137,11.3712081],[-10.3299327,11.3702561],[-10.3306997,11.368426],[-10.3309781,11.3672037],[-10.3307905,11.3664065],[-10.3303777,11.3657565],[-10.3298398,11.3653762],[-10.3287014,11.3652168],[-10.3260619,11.3649837],[-10.3239834,11.3646026],[-10.3216125,11.3638925],[-10.3211296,11.3638241],[-10.3206201,11.3638555],[-10.3196318,11.3642357],[-10.3182683,11.3646649],[-10.3168672,11.3648366],[-10.3152535,11.3648488],[-10.3145529,11.3650084],[-10.312965,11.3658121],[-10.3104115,11.3666221],[-10.3087753,11.3670007],[-10.3071096,11.3672159],[-10.30482,11.3677001],[-10.3039197,11.3678904],[-10.3016054,11.3684792],[-10.3007922,11.3688961],[-10.3001668,11.3693866],[-10.2995002,11.3702352],[-10.2981152,11.3721338],[-10.2978238,11.3726675],[-10.2977809,11.3729382],[-10.2978274,11.3732131],[-10.2979928,11.3736404],[-10.2983153,11.3744641],[-10.2986782,11.3777752],[-10.2990659,11.38013],[-10.2995539,11.3819694],[-10.2996413,11.3831959],[-10.2994162,11.3843977],[-10.2989409,11.3856485],[-10.2980026,11.3875249],[-10.2975522,11.3887513],[-10.2972396,11.3905661],[-10.2969392,11.3935707],[-10.2964264,11.39606],[-10.2955633,11.3994324],[-10.2952004,11.4004135],[-10.2935491,11.4028538],[-10.2921188,11.4045121],[-10.2910097,11.4059562],[-10.2891207,11.4084456],[-10.2887704,11.4088134],[-10.2879573,11.4090219],[-10.2868064,11.4089361],[-10.2848049,11.4085681],[-10.2830785,11.4085069],[-10.2822779,11.4082862],[-10.2815398,11.4078202],[-10.281077,11.4071947],[-10.2802888,11.4058214],[-10.2792353,11.4044322],[-10.2789841,11.4040852],[-10.2772239,11.4020648],[-10.2762331,11.4006922],[-10.2750885,11.3983255],[-10.2746954,11.3974059],[-10.2743994,11.3969506],[-10.2742643,11.3967425],[-10.2738484,11.3961854],[-10.2728798,11.395147],[-10.2719687,11.394358],[-10.2707922,11.3937336],[-10.2691753,11.3926802],[-10.268231,11.3917863],[-10.2670348,11.38983],[-10.2657767,11.38834],[-10.2644942,11.3868744],[-10.2640897,11.3864802],[-10.2636982,11.3863381],[-10.2631402,11.3862276],[-10.2615927,11.3863368],[-10.2604783,11.3866663],[-10.2593282,11.3874381],[-10.2587666,11.3883022],[-10.2586039,11.3889461],[-10.2586212,11.389377],[-10.2586636,11.3897367],[-10.2586301,11.3899574],[-10.2585476,11.3901602],[-10.2581973,11.3905035],[-10.2578408,11.3907672],[-10.2571455,11.3911868],[-10.2566975,11.3916889],[-10.2559393,11.3926496],[-10.2553577,11.3934895],[-10.2547583,11.3940081],[-10.254297,11.3942946],[-10.253731,11.394505],[-10.2525455,11.3947101],[-10.2507726,11.3948336],[-10.2489406,11.3949914],[-10.2478516,11.3952544],[-10.2465186,11.3955752],[-10.2460519,11.3956513],[-10.2456013,11.3956986],[-10.2452472,11.3957355],[-10.2449629,11.3958643],[-10.244582,11.3960984],[-10.2440831,11.3964165],[-10.2433322,11.3969081],[-10.2430129,11.397204],[-10.2426159,11.3979389],[-10.2422404,11.3984122],[-10.2416158,11.3989098],[-10.2412668,11.3993745],[-10.2412131,11.3997584],[-10.2414156,11.4002404],[-10.2419883,11.4006787],[-10.2430934,11.4009468],[-10.2445258,11.4014095],[-10.2457377,11.4020308],[-10.2463695,11.4025335],[-10.2474327,11.403674],[-10.2484336,11.4046182],[-10.2491466,11.4051025],[-10.2499785,11.4054336],[-10.2511043,11.405826],[-10.2519863,11.4063228],[-10.2528557,11.4071933],[-10.253425,11.4081191],[-10.2537877,11.4088611],[-10.2540879,11.4099034],[-10.2542444,11.4105839],[-10.254188,11.4111542],[-10.2540191,11.4116323],[-10.2521164,11.4136512],[-10.2515772,11.4143348],[-10.2513948,11.4148607],[-10.2512714,11.415234],[-10.2509335,11.4156862],[-10.250625,11.4160306],[-10.2503648,11.4161567],[-10.250169,11.4162172],[-10.2500162,11.4162225],[-10.2498364,11.4162015],[-10.2496621,11.4160831],[-10.2493697,11.4157493],[-10.2490667,11.4155837],[-10.2486938,11.4155468],[-10.248152,11.4155521],[-10.2478597,11.4155258],[-10.2476263,11.4154548],[-10.2472508,11.4152419],[-10.247106,11.4150525],[-10.2469451,11.4148027],[-10.2466419,11.4146292],[-10.2461323,11.4143296],[-10.2455798,11.413922],[-10.2448946,11.4133679],[-10.2441381,11.4129814],[-10.2426828,11.4125564],[-10.2407272,11.4120858],[-10.2395031,11.4117076],[-10.238716,11.4114848],[-10.2375627,11.4113691],[-10.2365756,11.4114533],[-10.2356477,11.4116845],[-10.2340919,11.4123314],[-10.231576,11.4132989],[-10.2307888,11.413646],[-10.2292013,11.4143457],[-10.2274663,11.4149618],[-10.2264487,11.4149855],[-10.2258549,11.4148005],[-10.2253621,11.4144224],[-10.2251549,11.4140902],[-10.225085,11.4138852],[-10.2249725,11.4134487],[-10.2248704,11.4132068],[-10.2245781,11.4128572],[-10.223878,11.4123577],[-10.2231647,11.4118633],[-10.2226549,11.411653],[-10.222266,11.4114611],[-10.2203697,11.4104989],[-10.2180878,11.409315],[-10.2174872,11.4088124],[-10.2172245,11.4082728],[-10.2171182,11.4077823],[-10.2172308,11.406838],[-10.2175998,11.4054463],[-10.2180064,11.404128],[-10.2183566,11.4029324],[-10.218807,11.4019637],[-10.2192511,11.4009765],[-10.2196139,11.3994926],[-10.2198015,11.3981744],[-10.2196701,11.3968255],[-10.2195075,11.3959671],[-10.2190341,11.3949835],[-10.2183366,11.3937898],[-10.2178967,11.392959],[-10.2175374,11.3925802],[-10.2169472,11.3924541],[-10.2163732,11.3924331],[-10.2160353,11.3925855],[-10.2157046,11.3928829],[-10.2151716,11.3933455],[-10.2143724,11.393724],[-10.2139163,11.3938581],[-10.2126771,11.3941054],[-10.2117303,11.3941842],[-10.2101504,11.3941827],[-10.2089118,11.3940295],[-10.2077109,11.3939927],[-10.206191,11.3942747],[-10.2026632,11.395078],[-10.2007305,11.3957585],[-10.2000549,11.3960284],[-10.1995983,11.3964208],[-10.1992543,11.3969972],[-10.1986852,11.398389],[-10.1980806,11.3997689],[-10.1975441,11.4009784],[-10.1970151,11.4024971],[-10.1965461,11.4036681],[-10.1960956,11.4045695],[-10.1955327,11.4057529],[-10.1949447,11.4065377],[-10.1944193,11.4068381],[-10.1939815,11.4068749],[-10.1932934,11.4067094],[-10.1926805,11.4067216],[-10.1916923,11.406231],[-10.1911105,11.4060778],[-10.1905976,11.4059613],[-10.1901973,11.4057529],[-10.1896594,11.4052501],[-10.189503,11.4049251],[-10.1895718,11.4046308],[-10.1897344,11.4043427],[-10.1897219,11.4039625],[-10.1894029,11.4028282],[-10.1890778,11.402123],[-10.1886398,11.401559],[-10.1881144,11.4012218],[-10.1879017,11.4008907],[-10.1876828,11.4001059],[-10.1875391,11.3987139],[-10.1875577,11.3978495],[-10.1874326,11.3971198],[-10.1870825,11.3960283],[-10.1867509,11.3946243],[-10.1866758,11.3937413],[-10.1866509,11.3926805],[-10.1873263,11.3889157],[-10.1874577,11.3880144],[-10.1874702,11.3872418],[-10.1872889,11.3864814],[-10.1869635,11.3859419],[-10.1858502,11.3849363],[-10.1852872,11.38455],[-10.1849057,11.3841514],[-10.1845554,11.3836731],[-10.1842614,11.3831519],[-10.1837611,11.3818886],[-10.1832295,11.3798958],[-10.1824725,11.3766582],[-10.1820347,11.3753705],[-10.1814781,11.3742912],[-10.1810026,11.3736229],[-10.1805273,11.3732672],[-10.1799707,11.3731384],[-10.1795765,11.3731875],[-10.1793076,11.3733899],[-10.1789511,11.3739234],[-10.1779566,11.3748737],[-10.1770121,11.3755729],[-10.17603,11.3760696],[-10.1734782,11.3771671],[-10.1717956,11.3779826],[-10.1699378,11.3791662],[-10.1683116,11.3800369],[-10.1672107,11.3805152],[-10.166823,11.380883],[-10.1663663,11.3810609],[-10.1657658,11.3811284],[-10.1648902,11.3813001],[-10.1643522,11.3815638],[-10.1637705,11.3816925],[-10.1628574,11.3817844],[-10.1622443,11.3817171],[-10.1617877,11.381527],[-10.161181,11.3810548],[-10.1607308,11.3809014],[-10.1602428,11.380969],[-10.159855,11.38111],[-10.1596866,11.3811934],[-10.1588167,11.3816251],[-10.1579973,11.3822873],[-10.1568214,11.3828698],[-10.156296,11.3830722],[-10.1557956,11.3830845],[-10.1551951,11.3829189],[-10.1546384,11.3826184],[-10.1543257,11.3823118],[-10.1540255,11.3819255],[-10.153475,11.3815883],[-10.1524681,11.381116],[-10.1510857,11.3806746],[-10.1499349,11.3803495],[-10.1491029,11.3800492],[-10.1486963,11.3798959],[-10.1481897,11.379577],[-10.1474579,11.3790313],[-10.1470513,11.3785285],[-10.1467011,11.3779029],[-10.146282,11.3767318],[-10.1460756,11.3756955],[-10.1460757,11.3748983],[-10.1462444,11.3725559],[-10.1462757,11.3718078],[-10.1464383,11.3710045],[-10.14682,11.3700785],[-10.1472202,11.3692446],[-10.1477143,11.3685517],[-10.148196,11.367963],[-10.1487465,11.3675091],[-10.1497847,11.3669941],[-10.1509293,11.3665342],[-10.1522117,11.3658289],[-10.1535251,11.3648785],[-10.1552015,11.3636152],[-10.1576783,11.3619166],[-10.1587979,11.3612176],[-10.1596112,11.3607146],[-10.1601052,11.3601996],[-10.1605118,11.359568],[-10.1609308,11.3586543],[-10.1613812,11.3579613],[-10.1621006,11.357213],[-10.1629324,11.3563485],[-10.1640583,11.3550055],[-10.1645899,11.3541653],[-10.1649402,11.353503],[-10.1650715,11.3529082],[-10.1650152,11.3526016],[-10.1648526,11.3522704],[-10.1643398,11.3518656],[-10.1637205,11.3514241],[-10.1629888,11.3511419],[-10.1624195,11.3511236],[-10.16145,11.3510439],[-10.1607995,11.3509765],[-10.1598801,11.3506759],[-10.1582225,11.3500075],[-10.1541944,11.3479225],[-10.1528372,11.3474747],[-10.1495964,11.3469417],[-10.1486013,11.3468549],[-10.1478428,11.3467258],[-10.1476121,11.3466416],[-10.1473546,11.3463708],[-10.1471321,11.3461656],[-10.1467431,11.3460553],[-10.1464051,11.3460473],[-10.1459679,11.3461762],[-10.1452652,11.3462735],[-10.144431,11.3462525],[-10.1433689,11.3460052],[-10.1412338,11.3452795],[-10.139689,11.3444852],[-10.1383585,11.3441328],[-10.1368564,11.3438383],[-10.1353652,11.3434544],[-10.1343951,11.343273],[-10.1329135,11.3431862],[-10.1319404,11.3431733],[-10.1303548,11.3432072],[-10.128641,11.3430996],[-10.1277785,11.3431039],[-10.1266994,11.3432816],[-10.1254344,11.3435462],[-10.1248683,11.3437761],[-10.1242071,11.3441855],[-10.1237892,11.3445782],[-10.1234706,11.345064],[-10.1233864,11.3455372],[-10.1234213,11.345908],[-10.1235554,11.3461499],[-10.1238775,11.3464343],[-10.1243171,11.3467206],[-10.1245397,11.3468889],[-10.1249744,11.3470466],[-10.1259774,11.3475569],[-10.1264495,11.3479512],[-10.1270342,11.3485036],[-10.1276404,11.3492294],[-10.1279032,11.3495843],[-10.1281205,11.3498289],[-10.1285148,11.3500708],[-10.1293542,11.3507414],[-10.1325563,11.3527361],[-10.1351747,11.3548002],[-10.1360238,11.3558583],[-10.1365368,11.3570898],[-10.1366961,11.3580437],[-10.1365899,11.3594661],[-10.1361831,11.361426],[-10.1356876,11.3630391],[-10.1350861,11.3640971],[-10.1336709,11.3657448],[-10.1323793,11.3673232],[-10.129655,11.3701155],[-10.1283361,11.3710363],[-10.1267182,11.3716418],[-10.1253558,11.3719888],[-10.1232861,11.3730987],[-10.1199247,11.3755789],[-10.1185155,11.3768458],[-10.1177323,11.3777976],[-10.1169702,11.3789436],[-10.1158678,11.3803899],[-10.1152486,11.3811616],[-10.1149052,11.3814421],[-10.1145673,11.3815],[-10.1143849,11.3814684],[-10.1140148,11.3808426],[-10.1137626,11.3802641],[-10.1134435,11.3799432],[-10.113017,11.3797381],[-10.1123223,11.3794911],[-10.1116812,11.3791229],[-10.1106459,11.3782394],[-10.1095463,11.3772349],[-10.1087362,11.3763041],[-10.107792,11.3747527],[-10.1064939,11.3725648],[-10.1056141,11.3711976],[-10.1046539,11.3703245],[-10.1035917,11.3694989],[-10.102771,11.3690097],[-10.101682,11.3687941],[-10.1007485,11.3688099],[-10.0994611,11.3690466],[-10.0969381,11.3696539],[-10.0959384,11.3700876],[-10.0949926,11.3706558],[-10.0945902,11.3711318],[-10.0944829,11.3714946],[-10.0944293,11.3718838],[-10.0943649,11.3722704],[-10.0942308,11.3725701],[-10.0939143,11.3729173],[-10.0933296,11.3733144],[-10.0925812,11.3736246],[-10.0911088,11.373969],[-10.0877452,11.3745423],[-10.0860931,11.3750156],[-10.085449,11.3751257],[-10.0848645,11.3751997],[-10.0835314,11.3751682],[-10.0825042,11.3751208],[-10.0819731,11.3751839],[-10.0811524,11.3752996],[-10.0799239,11.3755048],[-10.0794303,11.3756152],[-10.078851,11.3758412],[-10.0779123,11.3764039],[-10.0771719,11.376751],[-10.0763941,11.3770693],[-10.0760803,11.3772822],[-10.0752783,11.3778634],[-10.0747499,11.378334],[-10.0744335,11.3786837],[-10.0741249,11.3788836],[-10.0736738,11.379011],[-10.0732124,11.3790266],[-10.0724968,11.3790454],[-10.0715822,11.3789046],[-10.0704075,11.3786522],[-10.0693506,11.3782762],[-10.0686962,11.3781131],[-10.068208,11.378171],[-10.0677649,11.3784821],[-10.0675508,11.3788126],[-10.0674382,11.3792123],[-10.0674462,11.3801432],[-10.0675428,11.3822205],[-10.0673605,11.3842503],[-10.066867,11.3863223],[-10.0666255,11.3869166],[-10.0661641,11.387553],[-10.0653863,11.3883944],[-10.0649518,11.3887572],[-10.0643992,11.3890254],[-10.0637448,11.3892147],[-10.0631332,11.3892304],[-10.0626773,11.3890885],[-10.0619961,11.3887834],[-10.0613193,11.388373],[-10.0609659,11.3880738],[-10.0606446,11.3874518],[-10.0606046,11.3870265],[-10.060733,11.3863573],[-10.0612953,11.3846406],[-10.0616808,11.3830108],[-10.0617493,11.3820626],[-10.0616849,11.3816156],[-10.0615025,11.3800591],[-10.0609821,11.3770341],[-10.0604886,11.3745266],[-10.0603437,11.3735957],[-10.0604082,11.3725175],[-10.0608213,11.3701047],[-10.061084,11.3690098],[-10.0614238,11.3672856],[-10.0615615,11.3662329],[-10.0616688,11.3652757],[-10.061862,11.3639924],[-10.0618994,11.3626461],[-10.0620021,11.3618915],[-10.0623154,11.3613717],[-10.0628374,11.3609544],[-10.064741,11.3598756],[-10.0659458,11.3590645],[-10.0676808,11.3574501],[-10.0682938,11.3570134],[-10.0686372,11.3564873],[-10.0690877,11.3556302],[-10.0695437,11.355141],[-10.0712311,11.3539851],[-10.0723314,11.3531426],[-10.0734479,11.3520873],[-10.0745564,11.3508036],[-10.075231,11.349646],[-10.0756247,11.3487403],[-10.0759006,11.3474464],[-10.0758736,11.3467953],[-10.0755844,11.345866],[-10.074725,11.3437633],[-10.073986,11.3425663],[-10.0734398,11.3419441],[-10.0729982,11.3416999],[-10.0725001,11.3416134],[-10.0718816,11.3418732],[-10.0714318,11.3423458],[-10.0700664,11.3438026],[-10.0691989,11.3444406],[-10.0682993,11.3448501],[-10.0674559,11.3450548],[-10.0662511,11.3452202],[-10.0655765,11.3452595],[-10.0648213,11.3452281],[-10.0638897,11.345543],[-10.0634719,11.3457479],[-10.0629562,11.3461894],[-10.062492,11.3465511],[-10.061599,11.3471782],[-10.0606688,11.3480237],[-10.0588776,11.3504336],[-10.0572712,11.3527015],[-10.0553435,11.3549143],[-10.0533996,11.3568831],[-10.0519485,11.3587646],[-10.0509077,11.3603688],[-10.0490786,11.3637662],[-10.0482738,11.3652284],[-10.0478447,11.3661856],[-10.0470462,11.3678763],[-10.0462675,11.3691518],[-10.0457419,11.3702035],[-10.0455809,11.3707926],[-10.0454682,11.3717656],[-10.0453985,11.3727911],[-10.0453824,11.3738324],[-10.0453771,11.3753101],[-10.0455728,11.3764514],[-10.0457376,11.3772785],[-10.0458089,11.3778082],[-10.0458062,11.3786549],[-10.0457069,11.3795358],[-10.0455017,11.3802063],[-10.0454722,11.3804442],[-10.0454749,11.3806625],[-10.045609,11.3810188],[-10.0457472,11.3811489],[-10.0459041,11.3812555],[-10.0462595,11.381396],[-10.0465062,11.3815078],[-10.0466834,11.3816682],[-10.0467718,11.3818128],[-10.0468335,11.3819943],[-10.0468066,11.3822941],[-10.0466752,11.3825464],[-10.0465304,11.382749],[-10.0464204,11.3829198],[-10.0463828,11.3831249],[-10.0464164,11.3832801],[-10.0467249,11.3839399],[-10.0470158,11.3848368],[-10.047142,11.385686],[-10.0471151,11.3866116],[-10.0468576,11.3875792],[-10.0464518,11.3882077],[-10.0460663,11.3889544],[-10.0454317,11.3896565],[-10.0446607,11.3902077],[-10.0438977,11.3905225],[-10.0415844,11.3911525],[-10.0405081,11.3915068],[-10.038741,11.3924438],[-10.0376808,11.392987],[-10.0367886,11.3935479],[-10.0350463,11.3949713],[-10.0340341,11.3957036],[-10.0334317,11.3959477],[-10.0327811,11.3960343],[-10.0307214,11.3956304],[-10.0301261,11.3954831],[-10.0296621,11.3953819],[-10.0291712,11.3953227],[-10.0287009,11.3952834],[-10.0271756,11.3950361],[-10.0258012,11.3948296],[-10.0251908,11.3949004],[-10.0244518,11.3951997],[-10.0242063,11.3953937],[-10.0240454,11.3956092],[-10.0239703,11.3960484],[-10.0240749,11.3965638],[-10.0242573,11.3968031],[-10.0244866,11.3969607],[-10.0248153,11.3970146],[-10.0253996,11.3971918],[-10.0261483,11.3976076],[-10.0267626,11.3979389],[-10.0269691,11.3980992],[-10.0272909,11.3984148],[-10.027425,11.3986172],[-10.027492,11.3988644],[-10.0274599,11.3994297],[-10.0274786,11.3997793],[-10.0275807,11.4001606],[-10.0278837,11.4007679],[-10.0281251,11.4016094],[-10.0282243,11.4021747],[-10.0281841,11.4026822],[-10.0279453,11.4032369],[-10.0270549,11.4048144],[-10.0263065,11.4067864],[-10.0257048,11.4080416],[-10.0252631,11.4086163],[-10.0245723,11.4091911],[-10.0235763,11.4095769],[-10.0216727,11.4100493],[-10.0207008,11.410191],[-10.0201787,11.4101044],[-10.0193674,11.4095927],[-10.0191397,11.4091922],[-10.0190672,11.4087188],[-10.0189761,11.4082771],[-10.0185952,11.4074148],[-10.0179218,11.4064668],[-10.0163448,11.4047593],[-10.0159908,11.4042675],[-10.0158513,11.4035393],[-10.0160069,11.4022403],[-10.016554,11.4002264],[-10.017171,11.3984542],[-10.0174284,11.3969502],[-10.017643,11.3946996],[-10.0179649,11.3927223],[-10.0181151,11.3921596],[-10.0183834,11.3916179],[-10.01979,11.3891595],[-10.0200852,11.3884024],[-10.020183,11.3874057],[-10.0200624,11.3867852],[-10.0196762,11.3861645],[-10.0187562,11.3854441],[-10.0181822,11.3851576],[-10.0178416,11.3850918],[-10.0173051,11.3850261],[-10.0168196,11.3849419],[-10.0163583,11.3847868],[-10.0142045,11.3835982],[-10.0116724,11.3829094],[-10.009457,11.382415],[-10.0081158,11.3822362],[-10.0070698,11.3822941],[-10.0060881,11.3824675],[-10.0017289,11.3839703],[-9.9992071,11.3844381],[-9.9972987,11.3846608],[-9.995822,11.3844826],[-9.9940955,11.3837253],[-9.9924825,11.3824558],[-9.990145,11.3793912],[-9.9889541,11.3776715],[-9.9882139,11.3769983],[-9.9871664,11.3764425],[-9.9854028,11.3762384],[-9.9841584,11.3763093],[-9.9838258,11.3762805],[-9.9835334,11.3762042],[-9.9833108,11.3761674],[-9.9831499,11.3762095],[-9.9830319,11.3763173],[-9.982938,11.376546],[-9.9828575,11.3768011],[-9.9827099,11.3773217],[-9.9825061,11.3778871],[-9.9824713,11.3781343],[-9.982482,11.3782684],[-9.9825061,11.3785812],[-9.9824149,11.3789599],[-9.9822862,11.3791545],[-9.9819991,11.3794201],[-9.9808901,11.3801116],[-9.9807184,11.3801498],[-9.9805736,11.3801406],[-9.9804301,11.3801182],[-9.980292,11.380155],[-9.9801538,11.3802326],[-9.9793572,11.3811633],[-9.9775338,11.3830795],[-9.9751257,11.3854402],[-9.9489227,11.3608278],[-9.902352,11.3247237],[-9.8698609,11.3215379],[-9.8384527,11.2992358],[-9.8287054,11.2493152],[-9.8322477,11.2083158],[-9.832721,11.2028375],[-9.8339445,11.1886749],[-9.8341206,11.1866368],[-9.8331503,11.1799735],[-9.8276223,11.14201],[-9.817875,11.0782456],[-9.7972974,11.0463581],[-9.7789423,11.0251733],[-9.7636701,11.0064943],[-9.7483622,10.9898585],[-9.7364612,10.976104],[-9.7323613,10.9713687],[-9.7184943,10.9553524],[-9.7109213,10.9466052],[-9.7052391,10.9400417],[-9.6526347,10.8805569],[-9.6055366,10.8534816],[-9.5873999,10.854047],[-9.5814131,10.8542337],[-9.5090427,10.8752924],[-9.4711345,10.8764205],[-9.3960837,10.8621309],[-9.2846563,10.871156],[-9.3152893,10.8358061],[-9.3344349,10.8049656],[-9.3478368,10.7553132],[-9.3390298,10.7361272],[-9.3719603,10.723712],[-9.4129318,10.694365],[-9.4298909,10.6600137],[-9.431442,10.6568718],[-9.4316945,10.6563603],[-9.4454794,10.6364153],[-9.4764952,10.612329],[-9.4928323,10.5894165],[-9.507894,10.5682915],[-9.5503972,10.5483407],[-9.5829448,10.5329063],[-9.6333205,10.4749077],[-9.6384318,10.4690223],[-9.6683541,10.4345666],[-9.6725462,10.429739],[-9.6867139,10.3845455],[-9.6725462,10.3197567],[-9.6759924,10.2873573],[-9.6947551,10.2557082],[-9.6901601,10.2199107],[-9.6970525,10.1584804],[-9.6888828,10.119091],[-9.6752771,10.1061632],[-9.6741264,10.101565],[-9.6804893,10.0944344],[-9.6891536,10.0879034],[-9.7072945,10.0710421],[-9.7072268,10.0638442],[-9.7039777,10.058179],[-9.7030977,10.0490479],[-9.6955841,10.0379836],[-9.6868521,10.0267856],[-9.6828584,10.0192533],[-9.6771048,10.0074547],[-9.6773986,9.9924054],[-9.6941858,9.9385371],[-9.6949981,9.9073322],[-9.6970965,9.8990522],[-9.7100778,9.8802685],[-9.7115521,9.8774473],[-9.7102609,9.8757934],[-9.7108754,9.8744424],[-9.7130102,9.8731931],[-9.7155625,9.8707992],[-9.7161631,9.8679375],[-9.7154687,9.8653258],[-9.7134695,9.8627204],[-9.7128592,9.8610043],[-9.7129038,9.8600374],[-9.7143861,9.8583366],[-9.7179684,9.856964],[-9.7209148,9.8540113],[-9.7238574,9.8524765],[-9.7249,9.8502511],[-9.7269203,9.8479287],[-9.7308319,9.8465542],[-9.7338333,9.8451984],[-9.7346175,9.8407248],[-9.7335178,9.8391482],[-9.7338479,9.8378809],[-9.7368922,9.8348863],[-9.7406859,9.8314881],[-9.7417609,9.8294602],[-9.7450069,9.8279379],[-9.7450069,9.8249135],[-9.7427861,9.8223887],[-9.743289,9.8197457],[-9.743463,9.8178601],[-9.7427771,9.8134671],[-9.7432815,9.8103195],[-9.7447339,9.8087294],[-9.7470784,9.8093895],[-9.7493519,9.8090448],[-9.7518246,9.8083487],[-9.75374,9.804917],[-9.7547124,9.8034796],[-9.757636,9.8039598],[-9.7590029,9.806317],[-9.7628442,9.8075213],[-9.765644,9.8080387],[-9.7677853,9.8071594],[-9.7698758,9.8042412],[-9.7714173,9.801372],[-9.7746765,9.7976533],[-9.7774333,9.7930689],[-9.7791676,9.7894802],[-9.7791676,9.7861143],[-9.7815425,9.7831052],[-9.7836106,9.780048],[-9.7863534,9.7746421],[-9.7899599,9.770411],[-9.79203,9.765991],[-9.793414,9.7625808],[-9.7935887,9.7589667],[-9.7923951,9.756446],[-9.793064,9.7541387],[-9.7942699,9.7512524],[-9.7947799,9.7473983],[-9.7971675,9.7453814],[-9.7982067,9.7428209],[-9.800239,9.7394825],[-9.8027969,9.738138],[-9.8048445,9.7361199],[-9.8066266,9.7356408],[-9.808827,9.7371422],[-9.8116324,9.7376607],[-9.8135821,9.7373113],[-9.8161715,9.7354397],[-9.8189064,9.7342604],[-9.8213895,9.7330368],[-9.8217386,9.7283925],[-9.8220765,9.7265604],[-9.823678,9.7234521],[-9.8246384,9.7188376],[-9.8271888,9.717832],[-9.8284326,9.7155553],[-9.8286066,9.7117828],[-9.8280934,9.7089164],[-9.8287747,9.7052228],[-9.8294526,9.7022156],[-9.8313315,9.7000269],[-9.8323676,9.697644],[-9.8333715,9.6958297],[-9.8353685,9.6948454],[-9.8386301,9.6943378],[-9.8407351,9.6933003],[-9.8431296,9.6907714],[-9.845789,9.6899522],[-9.8485672,9.6909792],[-9.8495048,9.6902397],[-9.8517305,9.6875395],[-9.8544146,9.6859119],[-9.8552339,9.685759],[-9.8558746,9.6855535],[-9.8561701,9.6852255],[-9.8567868,9.6849406],[-9.857598,9.6846536],[-9.8578275,9.6846745],[-9.8579703,9.6851039],[-9.8580932,9.6858535],[-9.860168,9.6870649],[-9.8633473,9.687239],[-9.8645899,9.686364],[-9.8671291,9.6846953],[-9.8698431,9.6845282],[-9.8740101,9.6838435],[-9.8759111,9.6823104],[-9.8798054,9.6808082],[-9.8843744,9.6811418],[-9.8868981,9.6824686],[-9.8884425,9.6841602],[-9.8904075,9.6852167],[-9.8928818,9.6845199],[-9.8961598,9.6829892],[-9.8986037,9.6816126],[-9.9000047,9.6791958],[-9.900667,9.677237],[-9.9027767,9.6769171],[-9.9053204,9.6775858],[-9.9084339,9.6784384],[-9.9112185,9.6782667],[-9.9141513,9.6775866],[-9.9167458,9.6769045],[-9.9205009,9.6748854],[-9.9238894,9.6750524],[-9.9260275,9.675228],[-9.9280113,9.6727391],[-9.9289225,9.6724057],[-9.955946,9.6690966],[-9.9914539,9.7025982],[-10.0179823,9.7127313],[-10.0907663,9.7182005],[-10.1466533,9.7121389],[-10.1724375,9.7034101],[-10.2068534,9.663235],[-10.2448739,9.6059479],[-10.2753231,9.5951205],[-10.3076116,9.5997326],[-10.3313166,9.6031187],[-10.3763099,9.6084891],[-10.38546,9.6095813],[-10.3920018,9.6103622],[-10.3952151,9.6104789],[-10.3968915,9.6105399],[-10.4071535,9.6109051],[-10.4095885,9.6110016],[-10.4165742,9.6112556],[-10.4167558,9.61142],[-10.4175686,9.6118902],[-10.4179046,9.6125005],[-10.4178829,9.6127314],[-10.41757,9.6131931],[-10.4171554,9.6135713],[-10.416855,9.6137081],[-10.4164874,9.613523],[-10.4162362,9.6136357],[-10.4161075,9.6139254],[-10.4161948,9.6141427],[-10.4164081,9.6144324],[-10.4167213,9.6146335],[-10.4170857,9.6146939],[-10.4174973,9.6143593],[-10.4177575,9.6142604],[-10.4178914,9.6145719],[-10.4175596,9.6151095],[-10.41673,9.6153735],[-10.416442,9.6155796],[-10.4162986,9.6160562],[-10.4163873,9.6165346],[-10.4162375,9.6167375],[-10.4159287,9.6167071],[-10.4148323,9.6156506],[-10.4146175,9.6155357],[-10.4144418,9.6157468],[-10.4145356,9.6164085],[-10.4141846,9.616718],[-10.4138008,9.6173371],[-10.4130034,9.6176154],[-10.4121572,9.6182155],[-10.4116587,9.6182449],[-10.411179,9.6179988],[-10.410148,9.6187834],[-10.4095755,9.6190212],[-10.4087682,9.6194087],[-10.4085587,9.6195472],[-10.4084396,9.6198209],[-10.4084697,9.620203],[-10.4086133,9.620651],[-10.4089543,9.6211713],[-10.4091972,9.6212891],[-10.4095747,9.6212864],[-10.4097556,9.6213909],[-10.4097265,9.6215927],[-10.4094518,9.6217766],[-10.4091507,9.6216674],[-10.4087777,9.6217629],[-10.4083118,9.6217843],[-10.4079364,9.6215027],[-10.4077298,9.6214785],[-10.4074566,9.6218254],[-10.40663,9.621879],[-10.4063329,9.622049],[-10.4060441,9.6226212],[-10.4056321,9.6230125],[-10.4049609,9.6231674],[-10.405,9.6235024],[-10.4054433,9.6236472],[-10.4056289,9.6238391],[-10.4055355,9.6242292],[-10.4049157,9.6246956],[-10.4049137,9.6249517],[-10.4051249,9.6251402],[-10.4054063,9.6256928],[-10.4052507,9.6257763],[-10.4046688,9.6257344],[-10.4044662,9.6259204],[-10.4041374,9.6259785],[-10.403674,9.6258877],[-10.403527,9.6261831],[-10.4037893,9.6264932],[-10.4038862,9.6268316],[-10.4037616,9.6270753],[-10.4034171,9.627387],[-10.4033456,9.6276526],[-10.403578,9.6278952],[-10.4039158,9.6280226],[-10.404658,9.6280199],[-10.4051329,9.6278351],[-10.4054525,9.627974],[-10.405468,9.6281827],[-10.4056707,9.6284559],[-10.4059552,9.6284435],[-10.4061742,9.6281364],[-10.4063511,9.6280556],[-10.4068004,9.6282769],[-10.4069387,9.6284476],[-10.4070369,9.628569],[-10.4070391,9.6289145],[-10.4069552,9.6291772],[-10.4066327,9.6293364],[-10.4058731,9.6295229],[-10.4056145,9.629827],[-10.4056955,9.630435],[-10.4056792,9.6309169],[-10.405431,9.6311116],[-10.4050618,9.6311624],[-10.4046737,9.6309824],[-10.4045154,9.6307329],[-10.4043636,9.6302636],[-10.40448,9.6300909],[-10.4045729,9.6297831],[-10.4043894,9.6296193],[-10.4040733,9.6295678],[-10.4037721,9.6296909],[-10.4036344,9.6298617],[-10.4035628,9.6302159],[-10.4036423,9.6308866],[-10.4033175,9.6311924],[-10.4033173,9.631371],[-10.4036295,9.6317274],[-10.4037439,9.632234],[-10.4036219,9.6327329],[-10.4032812,9.6335708],[-10.4030134,9.6338187],[-10.4029567,9.634012],[-10.4030414,9.6341852],[-10.4039729,9.6349609],[-10.404359,9.6354453],[-10.4052904,9.6362761],[-10.4062947,9.6373735],[-10.406376,9.6379092],[-10.4064305,9.6383405],[-10.4063519,9.6387877],[-10.4059906,9.6396899],[-10.4056992,9.6399293],[-10.4051519,9.6399939],[-10.4048116,9.639933],[-10.4045194,9.6396417],[-10.4041451,9.6394984],[-10.4039312,9.6396637],[-10.4037987,9.6405156],[-10.4034977,9.6417597],[-10.4035909,9.6421202],[-10.4041297,9.6424274],[-10.4047745,9.6423264],[-10.4050839,9.642482],[-10.4052873,9.6426676],[-10.4053927,9.6429828],[-10.4053742,9.6434236],[-10.4051821,9.643664],[-10.4049361,9.6438041],[-10.4047368,9.6437578],[-10.4040328,9.6437658],[-10.4032927,9.6440028],[-10.4030367,9.644196],[-10.4029612,9.644615],[-10.4031356,9.644885],[-10.4034304,9.6450917],[-10.4038896,9.6451114],[-10.4041396,9.6452415],[-10.4042909,9.6456892],[-10.4046075,9.6457922],[-10.4055864,9.6455591],[-10.4058093,9.6456784],[-10.4059633,9.6461802],[-10.4058717,9.6464719],[-10.40575,9.6471462],[-10.4055642,9.6475609],[-10.4051788,9.6478544],[-10.404623,9.6477523],[-10.4044025,9.6480781],[-10.4044684,9.6486616],[-10.4042547,9.6490183],[-10.4039272,9.6491335],[-10.4037946,9.6492956],[-10.4040821,9.6496453],[-10.4043384,9.6497376],[-10.404806,9.6495156],[-10.4050808,9.6496169],[-10.4051962,9.6500393],[-10.40555,9.6503785],[-10.4055927,9.6508947],[-10.4053259,9.6519008],[-10.4049747,9.653011],[-10.4046353,9.6533639],[-10.4042743,9.6535165],[-10.4043436,9.6540363],[-10.4045513,9.6545838],[-10.4048898,9.6550653],[-10.4054516,9.6554679],[-10.4055243,9.6558703],[-10.4052999,9.6561866],[-10.4049181,9.6564878],[-10.4045924,9.6571886],[-10.4042715,9.6574396],[-10.4038448,9.6573278],[-10.4036057,9.6573737],[-10.4035858,9.6576279],[-10.4037227,9.6579122],[-10.4042843,9.6584068],[-10.4049445,9.6585999],[-10.4051127,9.6589182],[-10.4049684,9.6592439],[-10.4045891,9.6594833],[-10.4041742,9.6595183],[-10.4040099,9.6599085],[-10.4040018,9.6602821],[-10.4042453,9.660902],[-10.4045815,9.6610692],[-10.4054801,9.6611529],[-10.4057175,9.6613981],[-10.4056745,9.6616251],[-10.4053974,9.6620226],[-10.4054272,9.6622788],[-10.4059105,9.6624453],[-10.4063641,9.6622372],[-10.4068846,9.6625679],[-10.4069714,9.6632442],[-10.4071252,9.6634752],[-10.4074161,9.6635343],[-10.4079299,9.6632233],[-10.4080568,9.6628995],[-10.4083721,9.6629274],[-10.4085311,9.6632125],[-10.4084365,9.6635873],[-10.4081371,9.6638433],[-10.4078873,9.6642242],[-10.407655,9.6643308],[-10.4072542,9.6643811],[-10.406919,9.6643164],[-10.4067004,9.6641009],[-10.4064599,9.6641584],[-10.4063652,9.6643236],[-10.4061903,9.6655182],[-10.4054483,9.6659906],[-10.4044642,9.6663411],[-10.4034182,9.6667018],[-10.4027329,9.6671437],[-10.4024598,9.6673976],[-10.402501,9.6676872],[-10.4024598,9.6679157],[-10.4025062,9.668063],[-10.4026814,9.6682662],[-10.4029236,9.6684745],[-10.4031091,9.6687437],[-10.4032739,9.6698713],[-10.404423,9.6707094],[-10.4053556,9.6716085],[-10.4061336,9.6722789],[-10.4064273,9.6727158],[-10.4065149,9.6729291],[-10.4065201,9.6731627],[-10.4065098,9.6733151],[-10.40635,9.6734827],[-10.4061439,9.6736097],[-10.4059894,9.6737519],[-10.4058708,9.6739196],[-10.4058245,9.674077],[-10.4058502,9.6744072],[-10.4059894,9.6745595],[-10.4061182,9.6746967],[-10.4062728,9.6747932],[-10.4064582,9.6748288],[-10.4065407,9.6747576],[-10.4066025,9.6745595],[-10.4067056,9.6744732],[-10.4068705,9.6745138],[-10.4069735,9.6748491],[-10.4069065,9.6755906],[-10.4069065,9.6757989],[-10.4068808,9.6759665],[-10.4067468,9.676124],[-10.4064582,9.6762916],[-10.4059997,9.676449],[-10.405402,9.6769925],[-10.4050825,9.6775259],[-10.4049434,9.6780795],[-10.4048712,9.6781963],[-10.4047373,9.6783284],[-10.4045827,9.6784198],[-10.4043251,9.678435],[-10.4041035,9.6783893],[-10.4039438,9.678237],[-10.4037016,9.678242],[-10.40348,9.6785468],[-10.4034646,9.6787754],[-10.4033564,9.6790649],[-10.4021146,9.6795728],[-10.4020631,9.6798572],[-10.4021043,9.6803956],[-10.4021919,9.6806953],[-10.4023774,9.6810661],[-10.4029957,9.681442],[-10.4043921,9.6819397],[-10.4046188,9.6819854],[-10.4050877,9.6825645],[-10.4052989,9.6826914],[-10.405639,9.682666],[-10.4067107,9.6824984],[-10.4072672,9.6826457],[-10.4076176,9.6828083],[-10.4079399,9.6828085],[-10.4082617,9.6828083],[-10.408983,9.6828133],[-10.4100393,9.6829962],[-10.4106525,9.6829505],[-10.4123219,9.6823461],[-10.4127908,9.6836971],[-10.4133833,9.6850533],[-10.4134555,9.6855307],[-10.4134812,9.6858405],[-10.4133988,9.6861148],[-10.413306,9.6862926],[-10.413033,9.6864297],[-10.4118994,9.6868411],[-10.4117139,9.6868056],[-10.4114975,9.6866837],[-10.4113068,9.6865465],[-10.4111007,9.6864805],[-10.4108483,9.6865059],[-10.4106473,9.6865872],[-10.4105494,9.6867243],[-10.4105546,9.6868259],[-10.4106164,9.6869884],[-10.4106885,9.6871814],[-10.410704,9.6873998],[-10.4106267,9.6876233],[-10.4104464,9.6877909],[-10.4102351,9.6878468],[-10.4100805,9.6879026],[-10.409962,9.687862],[-10.4098899,9.6877858],[-10.4097456,9.6876589],[-10.4096271,9.6875928],[-10.4093798,9.6875979],[-10.4092819,9.6876944],[-10.4092303,9.6878468],[-10.4092458,9.6880957],[-10.4092973,9.6883395],[-10.409421,9.6885985],[-10.4095653,9.6887255],[-10.4097662,9.6888321],[-10.4100187,9.6888372],[-10.4102402,9.6888169],[-10.4106525,9.6889794],[-10.4107297,9.6891216],[-10.4107967,9.6893248],[-10.410771,9.6894873],[-10.4106937,9.6896295],[-10.4102145,9.6900359],[-10.4102248,9.6904066],[-10.4103072,9.6909298],[-10.4103794,9.691326],[-10.4104567,9.6915596],[-10.4105443,9.6917018],[-10.410704,9.6917374],[-10.4110028,9.6916916],[-10.4113171,9.6915545],[-10.4115748,9.6913006],[-10.4118942,9.6910466],[-10.4122395,9.6909806],[-10.412461,9.6911228],[-10.412595,9.6914834],[-10.4124404,9.6920777],[-10.4122549,9.6921843],[-10.4121416,9.692423],[-10.412023,9.6929259],[-10.4119561,9.6931392],[-10.4119045,9.6933677],[-10.4119767,9.6935049],[-10.4121364,9.6935607],[-10.4123374,9.6936674],[-10.412595,9.6937436],[-10.4127496,9.693708],[-10.4128062,9.6936115],[-10.4128629,9.6934693],[-10.413069,9.6933576],[-10.4133524,9.6933525],[-10.4135173,9.6934846],[-10.4137595,9.6937436],[-10.4139759,9.6940483],[-10.4141356,9.6941855],[-10.4143623,9.6941753],[-10.4145427,9.6941042],[-10.414723,9.6939213],[-10.4148467,9.6937741],[-10.4150631,9.6936318],[-10.4152795,9.6936522],[-10.4153619,9.6937639],[-10.4153671,9.6939112],[-10.4152589,9.694094],[-10.4151352,9.6942312],[-10.4149188,9.6945105],[-10.414857,9.6947391],[-10.4147591,9.6949524],[-10.4146354,9.695054],[-10.4143623,9.6951657],[-10.4133679,9.6952013],[-10.4131463,9.6952724],[-10.4129608,9.6955212],[-10.4128887,9.6959733],[-10.4128681,9.6962018],[-10.4127444,9.6962882],[-10.4125125,9.6963288],[-10.4123064,9.6963542],[-10.4121209,9.6962526],[-10.4118221,9.6961104],[-10.4115645,9.6959326],[-10.4112811,9.6953943],[-10.4111213,9.6952267],[-10.4109307,9.6953232],[-10.4106009,9.6955669],[-10.4102502,9.6959883],[-10.4102042,9.6963085],[-10.4103175,9.6965523],[-10.4103794,9.6966285],[-10.4103485,9.6967808],[-10.4102454,9.696923],[-10.410096,9.6970449],[-10.4099723,9.6971567],[-10.4099156,9.6972633],[-10.4099002,9.6974259],[-10.4099105,9.6975731],[-10.4100496,9.6977357],[-10.4101939,9.6977966],[-10.4104567,9.6978779],[-10.4106628,9.6979439],[-10.410807,9.6980506],[-10.4108792,9.6981623],[-10.4108998,9.6984112],[-10.4108998,9.6986753],[-10.410941,9.6988429],[-10.4110698,9.6989445],[-10.4112192,9.6990003],[-10.4113996,9.6989953],[-10.4115129,9.698914],[-10.4116624,9.6989292],[-10.4118272,9.6990308],[-10.4120127,9.6995996],[-10.4120179,9.700006],[-10.4118685,9.7005088],[-10.4110904,9.7016769],[-10.4107504,9.7019715],[-10.4099002,9.7022254],[-10.4098332,9.7024438],[-10.4098796,9.7028146],[-10.4100548,9.7033885],[-10.4102196,9.7036831],[-10.4103948,9.7037491],[-10.4109874,9.7036475],[-10.4112965,9.703739],[-10.4116005,9.7043027],[-10.4119148,9.7051864],[-10.4118736,9.7054455],[-10.4117654,9.7056486],[-10.411379,9.7059787],[-10.4109719,9.7062682],[-10.4107246,9.706385],[-10.4105752,9.706512],[-10.4104618,9.7066542],[-10.4104257,9.7069336],[-10.41057,9.7072992],[-10.4105443,9.7074618],[-10.4103278,9.7075176],[-10.4101527,9.7074313],[-10.4100599,9.7074364],[-10.409792,9.7076395],[-10.4095343,9.7079239],[-10.4093952,9.7082794],[-10.4093849,9.7085029],[-10.4094416,9.708828],[-10.409488,9.7090362],[-10.4095498,9.7092444],[-10.4094674,9.7093765],[-10.4093488,9.7094628],[-10.4091737,9.7094526],[-10.4090397,9.7094577],[-10.4088954,9.7093003],[-10.4087821,9.7089702],[-10.4086842,9.7087518],[-10.4084832,9.7086197],[-10.4083132,9.7087111],[-10.4081586,9.7089651],[-10.4081328,9.7092139],[-10.4084008,9.7094831],[-10.4088645,9.709732],[-10.4094674,9.7104227],[-10.4098126,9.7111794],[-10.4099929,9.711799],[-10.4099775,9.7122155],[-10.4099053,9.7124034],[-10.4098693,9.7126218],[-10.4098693,9.7127691],[-10.4099517,9.7128249],[-10.4101011,9.7128097],[-10.4102093,9.7127335],[-10.4102609,9.7125253],[-10.4103588,9.7123171],[-10.4104618,9.7122155],[-10.4106164,9.7121393],[-10.4108483,9.7121292],[-10.4112553,9.7121647],[-10.4114717,9.7120784],[-10.4118272,9.711926],[-10.4119921,9.7119971],[-10.4121209,9.7121393],[-10.4122085,9.7124339],[-10.4121828,9.7126726],[-10.4120797,9.7128808],[-10.4117345,9.7131144],[-10.4116314,9.7132871],[-10.4115439,9.7134496],[-10.4115439,9.713602],[-10.4115748,9.7137696],[-10.4116933,9.7139372],[-10.4118633,9.7140286],[-10.4121158,9.7140997],[-10.4123064,9.7143028],[-10.4122858,9.7145162],[-10.4120076,9.7147955],[-10.4118891,9.7149986],[-10.4116469,9.7154202],[-10.4114923,9.7155268],[-10.4112553,9.7155624],[-10.4109616,9.7155268],[-10.4107349,9.7154049],[-10.41057,9.7151612],[-10.4104567,9.7148717],[-10.4101836,9.7145619],[-10.4099311,9.714506],[-10.4097353,9.7146177],[-10.4096322,9.7148666],[-10.4096683,9.7151053],[-10.4098074,9.7153135],[-10.410029,9.7156639],[-10.4099981,9.7159026],[-10.4098435,9.7162175],[-10.4095962,9.7166644],[-10.4097349,9.7171149],[-10.4100187,9.7174059],[-10.4104051,9.7175126],[-10.4109358,9.7175227],[-10.4115439,9.7178224],[-10.4116263,9.7181119],[-10.4116366,9.7185232],[-10.4115078,9.7190413],[-10.4114956,9.7194453],[-10.4115439,9.7197523],[-10.4120694,9.7207578],[-10.4127186,9.7216618],[-10.4134297,9.7224338],[-10.4134864,9.7240995],[-10.4133885,9.7249477],[-10.4132184,9.7255622],[-10.4129557,9.7257755],[-10.4124971,9.7260396],[-10.4121931,9.726131],[-10.4117293,9.7259938],[-10.4111471,9.7259532],[-10.4106473,9.7260751],[-10.4094828,9.7265525],[-10.4092406,9.7267404],[-10.4091015,9.7269232],[-10.4091737,9.7272432],[-10.4100702,9.729107],[-10.4110544,9.7305442],[-10.4110698,9.7308337],[-10.4109152,9.7312196],[-10.4108431,9.7315294],[-10.410874,9.7317681],[-10.4110183,9.7318544],[-10.4112656,9.732088],[-10.4119818,9.733251],[-10.412023,9.7335913],[-10.4119561,9.7337893],[-10.4117603,9.7339214],[-10.4106937,9.7341448],[-10.4087408,9.7346933],[-10.4074682,9.7352163],[-10.4065458,9.7353585],[-10.4057111,9.7354601],[-10.405067,9.7357699],[-10.4047167,9.7361457],[-10.4046858,9.7365469],[-10.4047836,9.7369024],[-10.404897,9.7371563],[-10.4049949,9.7375219],[-10.4047888,9.7378317],[-10.4044796,9.7379739],[-10.4041293,9.7381212],[-10.4038459,9.7382938],[-10.4038613,9.738695],[-10.4039695,9.7389642],[-10.4042684,9.7396142],[-10.4046394,9.7399291],[-10.4043354,9.7413307],[-10.4052578,9.7436405],[-10.4049588,9.7442761],[-10.404155,9.7450175],[-10.4031606,9.7458351],[-10.4024547,9.7469168],[-10.4026453,9.7481609],[-10.4024238,9.748943],[-10.402027,9.7497149],[-10.4013844,9.7502839],[-10.4025917,9.7505318],[-10.4015221,9.7519116],[-10.401146,9.7524245],[-10.4008935,9.7530186],[-10.4007904,9.7536229],[-10.4009914,9.7545116],[-10.4012799,9.7557201],[-10.4014654,9.7564057],[-10.4012542,9.7568678],[-10.3999248,9.7574873],[-10.3992601,9.7581881],[-10.3985439,9.7591682],[-10.3982966,9.7594017],[-10.3978792,9.7594779],[-10.3976628,9.7592392],[-10.3972248,9.7578631],[-10.3978122,9.7564869],[-10.3980956,9.7554815],[-10.3984666,9.7549026],[-10.3988273,9.7543338],[-10.3987242,9.7536026],[-10.3984151,9.752912],[-10.3981626,9.7529323],[-10.3976216,9.7531354],[-10.3974516,9.7533233],[-10.3973124,9.7537041],[-10.3974155,9.7545928],[-10.3972918,9.7548823],[-10.3970754,9.7549737],[-10.3966684,9.7549077],[-10.396385,9.7550651],[-10.3962716,9.7552276],[-10.3960088,9.7553545],[-10.3953493,9.7556998],[-10.3951226,9.7557811],[-10.3927163,9.7556795],[-10.3920156,9.7552682],[-10.3909541,9.7543186],[-10.3906553,9.7540952],[-10.3903461,9.7540393],[-10.3900782,9.75441],[-10.3893568,9.7563295],[-10.3894238,9.758051],[-10.3891713,9.758767],[-10.3890599,9.760001],[-10.3889652,9.7603209],[-10.3887179,9.7604326],[-10.3883572,9.7603767],[-10.3876204,9.7604377],[-10.3870948,9.7606916],[-10.3867857,9.760783],[-10.3861365,9.7607373],[-10.3855542,9.7606408],[-10.3851472,9.7604072],[-10.3850802,9.7602853],[-10.3852347,9.7596912],[-10.3851265,9.7589244],[-10.3848019,9.7583049],[-10.384467,9.7579342],[-10.3837044,9.757919],[-10.3831067,9.7575127],[-10.3825706,9.7568281],[-10.3819628,9.7553698],[-10.381427,9.7547756],[-10.3807417,9.7547452],[-10.3797885,9.7549381],[-10.3796596,9.7553545],[-10.379639,9.7560604],[-10.3795051,9.7566139],[-10.3792268,9.7574111],[-10.3793711,9.7582795],[-10.3796184,9.7591885],[-10.3798091,9.7593256],[-10.3800564,9.7594322],[-10.3804274,9.7598283],[-10.3804892,9.7601076],[-10.3804076,9.7604967],[-10.38001,9.7611537],[-10.3795051,9.7615345],[-10.3792835,9.7618697],[-10.3792835,9.7628751],[-10.3785415,9.7648606],[-10.3785518,9.7657898],[-10.3787978,9.766892],[-10.378964,9.7674249],[-10.3792114,9.7677905],[-10.3795411,9.7679632],[-10.3798039,9.7682679],[-10.3798451,9.7693241],[-10.3797266,9.7697201],[-10.3785272,9.7706846],[-10.3774852,9.7715228],[-10.377408,9.7719036],[-10.3774183,9.7726805],[-10.3769854,9.7731223],[-10.3762435,9.773427],[-10.3759305,9.7738324],[-10.3754757,9.7748437],[-10.375249,9.7756409],[-10.3753212,9.7762401],[-10.375528,9.7769556],[-10.3754448,9.7779767],[-10.3751357,9.7783778],[-10.3749244,9.7790024],[-10.3748007,9.779957],[-10.3745277,9.7804698],[-10.3743061,9.7805307],[-10.3739609,9.7804444],[-10.3737342,9.7802667],[-10.3735744,9.7800027],[-10.3735229,9.7798199],[-10.3732601,9.7798351],[-10.3729973,9.7799976],[-10.3728582,9.7802921],[-10.3727912,9.7820287],[-10.3725697,9.78277],[-10.3722502,9.7830899],[-10.3714876,9.7830747],[-10.3702458,9.7826481],[-10.3697203,9.782836],[-10.3692772,9.7832676],[-10.3682003,9.7831915],[-10.3672419,9.7830848],[-10.3646965,9.7819728],[-10.3639803,9.7818408],[-10.3630734,9.781988],[-10.3625788,9.782181],[-10.3622696,9.7824146],[-10.3624087,9.7828614],[-10.3628364,9.7838008],[-10.3636093,9.7847757],[-10.3642276,9.7859537],[-10.3647274,9.7866798],[-10.3652942,9.7872993],[-10.3655827,9.7881472],[-10.3652375,9.7892186],[-10.3655312,9.7898381],[-10.3660001,9.7904423],[-10.3663556,9.7904575],[-10.3666493,9.7901681],[-10.3670667,9.7896908],[-10.3678344,9.7894826],[-10.369509,9.7895385],[-10.3698439,9.7899548],[-10.3699006,9.7911531],[-10.3701958,9.7926205],[-10.3705138,9.7929963],[-10.3712019,9.793364],[-10.3713227,9.7938595],[-10.3712815,9.7947683],[-10.3715701,9.795073],[-10.372276,9.7953726],[-10.37258,9.7966775],[-10.3726779,9.7977894],[-10.372884,9.7983276],[-10.3733147,9.7988168],[-10.3746771,9.7996833],[-10.3772585,9.8023489],[-10.3772946,9.8027704],[-10.3760271,9.8044103],[-10.3747441,9.8047251],[-10.3744916,9.8048419],[-10.3743422,9.8056797],[-10.37427,9.8064159],[-10.3742391,9.8069236],[-10.3740794,9.8074009],[-10.3738269,9.8077411],[-10.3733683,9.8083656],[-10.3723584,9.8103609],[-10.3720544,9.8113713],[-10.3719256,9.812143],[-10.3732387,9.8134666],[-10.373342,9.8139755],[-10.3729633,9.8152306],[-10.3717928,9.8173677],[-10.3699681,9.8203529],[-10.3697616,9.8214045],[-10.3710944,9.822396],[-10.3714485,9.8226596],[-10.3720682,9.8252377],[-10.3727567,9.8278496],[-10.372619,9.8304616],[-10.3725846,9.8324969],[-10.3717871,9.8341994],[-10.3715518,9.8347017],[-10.3719993,9.836703],[-10.3704845,9.838433],[-10.3698993,9.84057],[-10.3694862,9.8440976],[-10.3680841,9.8480498],[-10.3679633,9.8493147],[-10.3685047,9.850592],[-10.3687432,9.8519776],[-10.3687332,9.8525224],[-10.3684973,9.8529839],[-10.3682954,9.8530555],[-10.3677944,9.8528369],[-10.3671786,9.8527225],[-10.3665087,9.8527783],[-10.365108,9.8534021],[-10.364415,9.8538395],[-10.3627912,9.8551402],[-10.3623226,9.8560735],[-10.3622315,9.8566725],[-10.3622897,9.857321],[-10.3626535,9.8588437],[-10.3626972,9.8601465],[-10.3626018,9.8608422],[-10.362439,9.8611894],[-10.3622399,9.8613191],[-10.361909,9.8614044],[-10.3608769,9.8612987],[-10.3602829,9.8611183],[-10.360005,9.8607823],[-10.3601817,9.860142],[-10.3604312,9.8595094],[-10.3604006,9.8587639],[-10.3602773,9.8584211],[-10.3596059,9.8585275],[-10.3591662,9.8583891],[-10.3587419,9.8578218],[-10.3577162,9.8576417],[-10.3568393,9.8576187],[-10.3558571,9.8573592],[-10.3550891,9.8572884],[-10.3548107,9.8573792],[-10.3542507,9.8581215],[-10.3537118,9.8585399],[-10.3528436,9.8589528],[-10.3521734,9.8590379],[-10.3513806,9.8590751],[-10.350471,9.8588987],[-10.3493635,9.859237],[-10.3492644,9.8594475],[-10.3493464,9.8596539],[-10.3498876,9.8597515],[-10.3509385,9.8603886],[-10.3514479,9.8609406],[-10.3515212,9.8614386],[-10.3513206,9.8617374],[-10.3513239,9.8619862],[-10.3515327,9.8622931],[-10.352112,9.8625735],[-10.3523036,9.8627585],[-10.3520824,9.8636823],[-10.3519123,9.8653398],[-10.3511945,9.8664827],[-10.3509305,9.8666402],[-10.3505991,9.8667396],[-10.3502649,9.8666893],[-10.3491749,9.8652942],[-10.34862,9.8647707],[-10.3482517,9.8645704],[-10.3471006,9.8642538],[-10.3462656,9.8640787],[-10.3457549,9.8641153],[-10.3452644,9.8640224],[-10.3449995,9.8637951],[-10.3445394,9.8637153],[-10.3442068,9.8640609],[-10.3439925,9.8643651],[-10.3431842,9.865927],[-10.34317,9.8662246],[-10.3433826,9.8675907],[-10.343693,9.8680952],[-10.3443166,9.8686796],[-10.3451749,9.8699653],[-10.3464055,9.8712811],[-10.3466839,9.8721001],[-10.3471298,9.8726265],[-10.3472438,9.8732109],[-10.3470192,9.8737541],[-10.3465245,9.8741111],[-10.346583,9.8746655],[-10.3474105,9.8751688],[-10.3475165,9.8755825],[-10.3473209,9.8762082],[-10.346608,9.876574],[-10.345453,9.8764138],[-10.3451634,9.8767729],[-10.3452201,9.8772204],[-10.3458505,9.877932],[-10.3458688,9.8782431],[-10.3454182,9.8784041],[-10.3448865,9.8779372],[-10.3443966,9.877233],[-10.3440624,9.8758599],[-10.3437282,9.8751467],[-10.3428131,9.8745734],[-10.3424759,9.8747876],[-10.34205,9.8753758],[-10.3410428,9.8764328],[-10.3407594,9.8769525],[-10.3405189,9.877239],[-10.3390145,9.8783928],[-10.3385658,9.8791148],[-10.3380964,9.879534],[-10.336827,9.8792846],[-10.3356495,9.8796578],[-10.3350966,9.880352],[-10.3350021,9.8807825],[-10.3350912,9.8812182],[-10.3353126,9.8816959],[-10.3353683,9.8819865],[-10.3351808,9.882192],[-10.3348492,9.8822729],[-10.3344451,9.8822752],[-10.334143,9.8820684],[-10.3339274,9.8816168],[-10.3337868,9.8806622],[-10.3336354,9.8803249],[-10.3332678,9.8800546],[-10.3328467,9.8794537],[-10.3325445,9.8792785],[-10.3323181,9.8793539],[-10.3320967,9.8795427],[-10.3318834,9.8805823],[-10.3313675,9.882239],[-10.330988,9.8833219],[-10.3303113,9.8845379],[-10.330248,9.8850158],[-10.3304468,9.8859631],[-10.3306619,9.886489],[-10.3307254,9.8866043],[-10.3311591,9.8873909],[-10.3313507,9.8882383],[-10.3311136,9.8891186],[-10.3310675,9.8895221],[-10.3312755,9.8897691],[-10.3315727,9.8898957],[-10.3320104,9.8897998],[-10.333237,9.8904009],[-10.3349556,9.8904781],[-10.335273,9.8905985],[-10.335453,9.8907819],[-10.3354742,9.8916342],[-10.335731,9.8923766],[-10.3360938,9.8946907],[-10.3362631,9.894968],[-10.3367644,9.8959026],[-10.3371106,9.8967398],[-10.3369412,9.8972336],[-10.3363293,9.8977218],[-10.3358065,9.8980996],[-10.3355061,9.8987201],[-10.3352008,9.8991102],[-10.3348089,9.8994738],[-10.3340162,9.8997386],[-10.3334123,9.9004418],[-10.3332177,9.9008477],[-10.3331105,9.9016355],[-10.3329102,9.9020451],[-10.3327588,9.9023548],[-10.3327622,9.9028349],[-10.3331296,9.9032832],[-10.3336094,9.9035721],[-10.3346025,9.9036377],[-10.3352045,9.9037654],[-10.3357882,9.9040739],[-10.3361553,9.904496],[-10.3364587,9.9051855],[-10.3364609,9.9056005],[-10.3370072,9.9060038],[-10.3374232,9.9061148],[-10.3381382,9.9060801],[-10.3385475,9.9057599],[-10.3388803,9.9058116],[-10.3394515,9.9062177],[-10.3399102,9.9067877],[-10.3403443,9.9068544],[-10.3412143,9.9062702],[-10.3416418,9.9062708],[-10.3417506,9.906644],[-10.3417939,9.9071874],[-10.341379,9.9083578],[-10.3411259,9.9086381],[-10.340086,9.9092003],[-10.3385516,9.9095057],[-10.3376316,9.9097533],[-10.3369873,9.9098499],[-10.3350789,9.9096387],[-10.3337926,9.9097512],[-10.3333425,9.9099302],[-10.3330087,9.9103501],[-10.3332286,9.9113871],[-10.3340104,9.9119856],[-10.3344951,9.9125273],[-10.3353188,9.9132136],[-10.3359781,9.913763],[-10.336374,9.9144489],[-10.3367021,9.9151527],[-10.3372008,9.9165608],[-10.3376006,9.9171984],[-10.3378966,9.9182256],[-10.3383766,9.9192146],[-10.3385831,9.9204998],[-10.3384299,9.9211738],[-10.3382404,9.9215123],[-10.3376146,9.9219016],[-10.3366695,9.922003],[-10.336281,9.922197],[-10.3361431,9.9224019],[-10.3362892,9.9239959],[-10.3364577,9.9244784],[-10.3370015,9.9254345],[-10.3377737,9.9259571],[-10.3389774,9.9259305],[-10.3392878,9.9261638],[-10.3393644,9.9265566],[-10.3391669,9.9269967],[-10.3392845,9.9276023],[-10.3395132,9.9279907],[-10.3401869,9.928565],[-10.3402846,9.9288722],[-10.3401564,9.9293273],[-10.3399905,9.9295217],[-10.3394919,9.9297027],[-10.3391961,9.9301889],[-10.3391954,9.9310765],[-10.339253,9.9318092],[-10.3390156,9.9324767],[-10.3385354,9.9328741],[-10.3383572,9.9333411],[-10.3382719,9.9339016],[-10.3381864,9.9345708],[-10.3382717,9.9348858],[-10.3387302,9.9358257],[-10.3394481,9.9361768],[-10.3400222,9.936116],[-10.340541,9.9361803],[-10.3409402,9.9363622],[-10.3410823,9.9366109],[-10.3408867,9.9369],[-10.3409249,9.937282],[-10.340775,9.9382409],[-10.3400362,9.9395673],[-10.3399346,9.9401419],[-10.3400539,9.9407436],[-10.3404699,9.9416908],[-10.3410882,9.9436731],[-10.3416867,9.9445264],[-10.3425187,9.9468077],[-10.3426493,9.9476543],[-10.3425909,9.9484277],[-10.3423908,9.949035],[-10.3425054,9.9496576],[-10.3430744,9.950568],[-10.3434927,9.9507564],[-10.3437178,9.9510378],[-10.3435785,9.9516868],[-10.3431671,9.9521477],[-10.3426473,9.952334],[-10.3421847,9.9528295],[-10.3420009,9.9532895],[-10.3420647,9.9538554],[-10.3419449,9.9541895],[-10.3417442,9.9545102],[-10.3414778,9.9547266],[-10.3410436,9.9547933],[-10.3405419,9.9546715],[-10.3402943,9.9548575],[-10.3402583,9.9553448],[-10.340571,9.9566189],[-10.3412101,9.9570178],[-10.3424266,9.9577819],[-10.3429148,9.9581785],[-10.3432881,9.9588077],[-10.3434366,9.9595078],[-10.343576,9.9609083],[-10.3437379,9.9613968],[-10.3441426,9.9618512],[-10.3444263,9.9624034],[-10.3449618,9.96354],[-10.3451889,9.9638014],[-10.3469884,9.9646017],[-10.3473943,9.9649636],[-10.3474599,9.9653333],[-10.3478968,9.9659045],[-10.3481649,9.9664333],[-10.348521,9.9688211],[-10.3488444,9.9701743],[-10.3491558,9.9708555],[-10.3494349,9.9717],[-10.3495068,9.9729743],[-10.3493297,9.9733231],[-10.3488599,9.9739459],[-10.3488838,9.9742141],[-10.3490409,9.9743443],[-10.349243,9.9747981],[-10.3494688,9.9750954],[-10.3499169,9.975208],[-10.3507929,9.9757281],[-10.3510193,9.9760571],[-10.3508355,9.9762885],[-10.3505283,9.9763857],[-10.3499993,9.9760145],[-10.3493441,9.9759022],[-10.3486699,9.975913],[-10.3484319,9.9760554],[-10.347467,9.977195],[-10.3472558,9.9776992],[-10.3471179,9.9783057],[-10.3474994,9.9789882],[-10.347733,9.9799889],[-10.3479776,9.980222],[-10.3495415,9.9807426],[-10.3498174,9.9809524],[-10.350111,9.9817405],[-10.3504607,9.9823939],[-10.3503468,9.9827961],[-10.3497323,9.9836631],[-10.3497625,9.9837203],[-10.3501366,9.9844282],[-10.3507018,9.9845855],[-10.3509409,9.9847671],[-10.351426,9.9849782],[-10.3521963,9.9850406],[-10.3523127,9.985324],[-10.3522766,9.9857939],[-10.3515965,9.9869884],[-10.3515907,9.9873949],[-10.3517726,9.9877849],[-10.3520809,9.9879623],[-10.3526487,9.9880156],[-10.3538878,9.988195],[-10.3542686,9.9883425],[-10.3548611,9.9891396],[-10.355385,9.9894444],[-10.3561951,9.9893291],[-10.3565468,9.9893674],[-10.3565973,9.9900594],[-10.3565076,9.9904182],[-10.3561489,9.9907841],[-10.35587,9.9918685],[-10.3556682,9.9923105],[-10.3550976,9.993173],[-10.3547233,9.9938248],[-10.3537787,9.9944645],[-10.3534075,9.994561],[-10.3530679,9.9944435],[-10.3527182,9.9945538],[-10.3521684,9.9949703],[-10.351568,9.9956276],[-10.3512006,9.9961733],[-10.3505896,9.9976183],[-10.3502166,9.9980579],[-10.3495988,9.9983343],[-10.3489334,9.998478],[-10.348482,9.9987461],[-10.3485865,9.9993603],[-10.3491343,10.0006455],[-10.3495153,10.0011175],[-10.3498777,10.0013109],[-10.3502627,10.0014124],[-10.350616,10.0013535],[-10.3507821,10.0010363],[-10.3515239,10.0002851],[-10.3515818,9.9998162],[-10.3518052,9.9989175],[-10.3528203,9.9972911],[-10.353457,9.9969666],[-10.3539389,9.9967789],[-10.3543075,9.9967559],[-10.3546761,9.9968696],[-10.3547463,9.9970894],[-10.3545942,9.9974507],[-10.3545931,9.9978572],[-10.3549503,9.9984846],[-10.3558553,9.9994697],[-10.3569111,10.0002918],[-10.357554,10.0009693],[-10.3578341,10.0014907],[-10.3579917,10.0021012],[-10.3581096,10.0040141],[-10.3579861,10.0045356],[-10.3574935,10.00469],[-10.3569636,10.0042756],[-10.3558819,10.0038276],[-10.3550753,10.0037139],[-10.3537511,10.0038554],[-10.3530318,10.0042858],[-10.3524602,10.0050043],[-10.3517755,10.0061687],[-10.3514917,10.0067896],[-10.3516052,10.0074986],[-10.3520379,10.0089148],[-10.3523592,10.0099903],[-10.3522756,10.0106083],[-10.351889,10.0114578],[-10.3515807,10.0115316],[-10.3510353,10.0114995],[-10.3491879,10.0115199],[-10.3487221,10.0116067],[-10.3482772,10.0115899],[-10.3478745,10.0112465],[-10.3473883,10.0110477],[-10.3466095,10.0110292],[-10.3451938,10.010702],[-10.3446879,10.0107913],[-10.3439979,10.0112655],[-10.3435504,10.011837],[-10.343097,10.0135256],[-10.3425842,10.0157319],[-10.3428914,10.0162219],[-10.3433657,10.0162942],[-10.3437766,10.0161552],[-10.3439714,10.0158143],[-10.3450736,10.0150853],[-10.3455828,10.0148793],[-10.3460502,10.0147601],[-10.3464492,10.0147864],[-10.3470175,10.0153036],[-10.3473971,10.0158299],[-10.3475961,10.0161516],[-10.3476312,10.0165343],[-10.3474023,10.0174098],[-10.3469814,10.0179353],[-10.3461963,10.0185163],[-10.345639,10.0190876],[-10.3450635,10.0196093],[-10.3443462,10.0201321],[-10.3433443,10.0205327],[-10.342687,10.0207125],[-10.3416241,10.0213695],[-10.3409088,10.0220236],[-10.3405439,10.0223],[-10.3395571,10.0224229],[-10.3391304,10.0225042],[-10.3387112,10.0224951],[-10.3382612,10.0222349],[-10.3373003,10.0214481],[-10.3369891,10.0209456],[-10.3366274,10.0208829],[-10.3356653,10.0216191],[-10.335334,10.022023],[-10.3350775,10.022575],[-10.3341487,10.0248052],[-10.3336981,10.02564],[-10.3327835,10.0269808],[-10.3322736,10.0278759],[-10.3316102,10.0284845],[-10.3311252,10.0285737],[-10.3304517,10.0285392],[-10.330132,10.0285228],[-10.3285762,10.0286092],[-10.3274426,10.0284466],[-10.3271653,10.0286009],[-10.3271478,10.0288865],[-10.3280928,10.03053],[-10.328736,10.032052],[-10.3290589,10.0324407],[-10.3293029,10.0329137],[-10.3292885,10.0333342],[-10.3282772,10.0347051],[-10.3271543,10.0350504],[-10.3262689,10.0354518],[-10.3258601,10.035752],[-10.3253921,10.0358999],[-10.3250322,10.0359255],[-10.324428,10.0357935],[-10.3238855,10.0357493],[-10.3232913,10.0358665],[-10.3224882,10.0363516],[-10.3222116,10.0371091],[-10.3222625,10.0374973],[-10.3228767,10.0385974],[-10.3232813,10.0389252],[-10.3237343,10.0390799],[-10.3244451,10.038939],[-10.3248452,10.0390046],[-10.3251085,10.0392284],[-10.3256168,10.0399497],[-10.3257913,10.0404034],[-10.3256351,10.041261],[-10.3253973,10.0415184],[-10.325202,10.0418521],[-10.3251414,10.0422523],[-10.3252128,10.0427594],[-10.3255016,10.0433689],[-10.3256934,10.0438478],[-10.325625,10.0442312],[-10.3253668,10.0446793],[-10.3249334,10.045019],[-10.3244107,10.0451866],[-10.3240741,10.0451845],[-10.3237652,10.0450369],[-10.3232505,10.0450613],[-10.3230119,10.045339],[-10.3229289,10.0458593],[-10.3229395,10.0464267],[-10.3231364,10.0471012],[-10.3234752,10.0475357],[-10.3234996,10.0479014],[-10.3232343,10.0482732],[-10.3228417,10.0485072],[-10.3221268,10.0486877],[-10.3215213,10.0487034],[-10.3204375,10.0485813],[-10.3199985,10.0482892],[-10.3196405,10.0477141],[-10.3193031,10.0474881],[-10.3189117,10.0474948],[-10.3186708,10.0477278],[-10.3183559,10.048417],[-10.3181807,10.0493087],[-10.3181596,10.0500529],[-10.3177169,10.0507756],[-10.31766,10.0513278],[-10.3182804,10.0515977],[-10.3188256,10.0517203],[-10.3191269,10.0522552],[-10.319397,10.0530301],[-10.3199229,10.0544799],[-10.3202369,10.0557955],[-10.3206113,10.0566442],[-10.3210429,10.0570453],[-10.3212699,10.0575256],[-10.3218575,10.0584836],[-10.3220938,10.059069],[-10.3221441,10.0599334],[-10.3222943,10.061309],[-10.321659,10.0621184],[-10.3219708,10.0629691],[-10.3222653,10.0631641],[-10.3228179,10.0632756],[-10.323309,10.0635169],[-10.3235988,10.0639918],[-10.3236983,10.0644264],[-10.3237102,10.0650643],[-10.3233997,10.0656891],[-10.3234807,10.0659549],[-10.3242907,10.0667525],[-10.3256947,10.0674835],[-10.3264777,10.0681614],[-10.3266127,10.0688792],[-10.3264507,10.0697432],[-10.3253572,10.0713914],[-10.3238187,10.0717656],[-10.3234669,10.0719584],[-10.3230796,10.0722878],[-10.3228737,10.0728755],[-10.3229938,10.0733362],[-10.3231933,10.0736973],[-10.3235832,10.0739472],[-10.3243918,10.0741652],[-10.3247035,10.0744055],[-10.3249492,10.0749302],[-10.3250303,10.0755582],[-10.3248107,10.0761911],[-10.3250235,10.0765573],[-10.3251908,10.0770016],[-10.3250939,10.0784144],[-10.3249526,10.0788136],[-10.3246854,10.0791461],[-10.3243962,10.0796142],[-10.3239832,10.0801004],[-10.3234249,10.0807614],[-10.3226517,10.0826508],[-10.3217408,10.0827511],[-10.3206122,10.0830759],[-10.3197289,10.0835499],[-10.3191325,10.0839898],[-10.3187477,10.0847099],[-10.318657,10.0856811],[-10.3187503,10.0861504],[-10.3187239,10.086981],[-10.3185897,10.0873398],[-10.3186622,10.0877337],[-10.3188715,10.0881401],[-10.3193311,10.0885297],[-10.3213614,10.090796],[-10.3218527,10.0916303],[-10.3222439,10.0925758],[-10.3225783,10.0937267],[-10.3234789,10.0950568],[-10.3236292,10.0956752],[-10.3235054,10.0960844],[-10.3231556,10.0964746],[-10.3226986,10.0966433],[-10.3221771,10.0966372],[-10.321489,10.096587],[-10.3203676,10.0965823],[-10.3197012,10.0964854],[-10.318704,10.0961457],[-10.3176566,10.0956241],[-10.3173578,10.0953281],[-10.3167745,10.0948712],[-10.3163551,10.0944513],[-10.3162306,10.0940265],[-10.3163621,10.0930979],[-10.3165617,10.0923343],[-10.3168348,10.0918049],[-10.3171851,10.0908645],[-10.3172318,10.0903084],[-10.3170041,10.0898002],[-10.3162164,10.0896844],[-10.3155123,10.0898049],[-10.3151986,10.0899255],[-10.3141453,10.0904018],[-10.3135618,10.0907952],[-10.3124593,10.0916083],[-10.3112804,10.092236],[-10.310777,10.0923645],[-10.3099959,10.092416],[-10.3088371,10.0923696],[-10.3083268,10.092196],[-10.306032,10.0909664],[-10.3050022,10.0901751],[-10.3045749,10.08965],[-10.30375,10.0889339],[-10.3029921,10.0885193],[-10.3023497,10.0884677],[-10.3016646,10.0886893],[-10.3010005,10.089034],[-10.3005337,10.0892131],[-10.2998764,10.0897529],[-10.299646,10.0900913],[-10.2993712,10.0911469],[-10.2992743,10.0922311],[-10.2993388,10.0930412],[-10.2995723,10.0942102],[-10.2992915,10.0944956],[-10.2981891,10.094772],[-10.2970344,10.0948666],[-10.2965039,10.094699],[-10.2955465,10.09462],[-10.2947973,10.0948523],[-10.2944432,10.0951469],[-10.294256,10.095657],[-10.2940296,10.0962656],[-10.2937162,10.0967156],[-10.2932199,10.0969985],[-10.2930414,10.0972471],[-10.2929848,10.0975085],[-10.2931198,10.0985072],[-10.2933418,10.0994972],[-10.2933766,10.1003887],[-10.2931589,10.1009073],[-10.2929805,10.1012802],[-10.2924972,10.1018717],[-10.2920575,10.1024674],[-10.2919922,10.1031703],[-10.2919226,10.1036718],[-10.291657,10.1038004],[-10.2910911,10.1041004],[-10.2904642,10.1042032],[-10.2895717,10.1045718],[-10.288701,10.1049276],[-10.2883963,10.1048675],[-10.2879958,10.1044775],[-10.2877824,10.1037146],[-10.2877084,10.1033246],[-10.2874733,10.1025574],[-10.2870336,10.1018502],[-10.2865765,10.1015159],[-10.2859671,10.1015545],[-10.2859105,10.1017217],[-10.2861194,10.1020345],[-10.2863153,10.1025617],[-10.2864546,10.1030546],[-10.286176,10.1034918],[-10.2855796,10.104349],[-10.2844564,10.1054804],[-10.2835552,10.1063805],[-10.2835335,10.1068219],[-10.2835378,10.1075119],[-10.283725,10.1082834],[-10.2840864,10.1092306],[-10.2843867,10.1100663],[-10.2845174,10.1105163],[-10.2843563,10.1111678],[-10.2841342,10.1119907],[-10.2836989,10.1128993],[-10.2834638,10.1136193],[-10.2831591,10.1142536],[-10.2826454,10.1148922],[-10.2820359,10.1155522],[-10.282123,10.1159893],[-10.2822753,10.1164865],[-10.2827281,10.1173308],[-10.2833245,10.1186722],[-10.2839471,10.1200051],[-10.2845914,10.1206651],[-10.2852139,10.1213551],[-10.2855186,10.1218908],[-10.2855448,10.122375],[-10.2849701,10.1226622],[-10.2843693,10.1229965],[-10.2838121,10.1232965],[-10.2832679,10.1233908],[-10.2830067,10.1229279],[-10.2825844,10.1221565],[-10.2818182,10.1210679],[-10.2807081,10.1196622],[-10.2804122,10.1194071],[-10.2799027,10.1189679],[-10.279254,10.1185822],[-10.2784269,10.1186251],[-10.2774082,10.1189508],[-10.2763982,10.1195208],[-10.2756102,10.1199108],[-10.2753136,10.1200076],[-10.2747961,10.1201765],[-10.274265,10.1201165],[-10.2736555,10.1198636],[-10.272528,10.1199536],[-10.2711392,10.1201593],[-10.2702903,10.1203993],[-10.2697722,10.1205193],[-10.2692455,10.1202193],[-10.268784,10.1193665],[-10.2683051,10.1184365],[-10.2676869,10.1174208],[-10.2669512,10.1167822],[-10.2663939,10.1167093],[-10.2661458,10.1168979],[-10.2658672,10.1173908],[-10.2655189,10.1179822],[-10.2651924,10.1184279],[-10.2644741,10.1189808],[-10.2636382,10.1193965],[-10.2625803,10.1198851],[-10.261566,10.1201765],[-10.2599378,10.1204036],[-10.259673,10.120418],[-10.2592282,10.1204422],[-10.258462,10.1204422],[-10.257822,10.1206008],[-10.257526,10.1208965],[-10.2573997,10.1213936],[-10.2577175,10.1216851],[-10.2582356,10.1220451],[-10.2585621,10.122645],[-10.2586709,10.1231722],[-10.2587145,10.1237379],[-10.2587493,10.1246465],[-10.258697,10.1252936],[-10.2587536,10.1259193],[-10.2590105,10.126305],[-10.2595939,10.1268964],[-10.2600727,10.127475],[-10.2604471,10.1281435],[-10.2605516,10.1286449],[-10.2604123,10.1291206],[-10.260064,10.1295578],[-10.2594545,10.1300163],[-10.2589713,10.1301578],[-10.258536,10.1298063],[-10.2582574,10.1293049],[-10.2580005,10.1289964],[-10.2575347,10.1285292],[-10.2568555,10.1283064],[-10.2558847,10.1282678],[-10.2541782,10.1284735],[-10.253068,10.1285764],[-10.2522844,10.1285035],[-10.2514616,10.1283878],[-10.2508434,10.1283792],[-10.250543,10.1285978],[-10.249964,10.1292321],[-10.249298,10.1298192],[-10.2483707,10.1303678],[-10.2478178,10.1307577],[-10.2474477,10.1313106],[-10.2471865,10.1318591],[-10.2470908,10.132232],[-10.2473389,10.1327677],[-10.2478439,10.1333162],[-10.2483533,10.1336676],[-10.2491151,10.1338219],[-10.2500511,10.1339119],[-10.2511656,10.1341433],[-10.2515748,10.1343147],[-10.2519013,10.1346362],[-10.2523236,10.1353261],[-10.2529287,10.1363418],[-10.2534381,10.1371603],[-10.2534555,10.1375803],[-10.2533597,10.1384717],[-10.2534511,10.140083],[-10.2534381,10.140923],[-10.2534903,10.14307],[-10.2533292,10.1435413],[-10.2529374,10.1438585],[-10.2521974,10.1444413],[-10.2520649,10.1446628],[-10.2517054,10.1452641],[-10.2513397,10.1459883],[-10.2507866,10.146602],[-10.2506214,10.1467854],[-10.2496314,10.1481138],[-10.2489932,10.1486924],[-10.2485274,10.1488124],[-10.2477481,10.1489666],[-10.2474976,10.1489845],[-10.2472083,10.1490052],[-10.2468252,10.1487952],[-10.2462592,10.1482595],[-10.2459516,10.1476737],[-10.2452111,10.147082],[-10.2443437,10.146284],[-10.2433599,10.1456026],[-10.2424587,10.1449812],[-10.2421657,10.1448116],[-10.2417665,10.1448503],[-10.2411489,10.1450952],[-10.2408727,10.145265],[-10.2406047,10.1454219],[-10.2405126,10.1456343],[-10.2405693,10.1458255],[-10.241038,10.1464438],[-10.2409833,10.1472422],[-10.2409916,10.1479639],[-10.2409872,10.1487309],[-10.2408697,10.1490823],[-10.2406868,10.1494252],[-10.2401992,10.1497723],[-10.2396768,10.1500979],[-10.2389324,10.1503422],[-10.2381444,10.1505051],[-10.2375567,10.1504836],[-10.2366164,10.1502522],[-10.2358066,10.149978],[-10.23474,10.1497808],[-10.2342394,10.1497208],[-10.233299,10.149948],[-10.2326242,10.1502351],[-10.2316926,10.1507322],[-10.2309917,10.1513278],[-10.2306913,10.1516707],[-10.2302081,10.1519792],[-10.22969,10.1521806],[-10.2291415,10.1522106],[-10.2285842,10.1517906],[-10.228249,10.1513321],[-10.2279356,10.1508479],[-10.2275655,10.1505051],[-10.2271258,10.1503636],[-10.2267906,10.1505522],[-10.2266992,10.1510236],[-10.226586,10.1517606],[-10.2265251,10.1523177],[-10.2264641,10.1530848],[-10.2264467,10.153509],[-10.2263248,10.1541433],[-10.2261463,10.1549789],[-10.2261333,10.1553817],[-10.2266295,10.1561659],[-10.2269648,10.1567658],[-10.2271781,10.1574086],[-10.2274132,10.1585956],[-10.2274175,10.1594741],[-10.2274045,10.1600226],[-10.2275351,10.1606739],[-10.2280183,10.1615095],[-10.228741,10.1621309],[-10.2292155,10.1621909],[-10.2295986,10.1623366],[-10.2299512,10.1624951],[-10.2306783,10.1624994],[-10.2312834,10.162388],[-10.2319016,10.1624694],[-10.2324893,10.1627008],[-10.2328724,10.1630351],[-10.2333121,10.1636178],[-10.2335994,10.1641406],[-10.2336386,10.1649077],[-10.2336691,10.1655718],[-10.233582,10.1661803],[-10.2333121,10.166566],[-10.2331249,10.1669559],[-10.2330552,10.1675344],[-10.2328202,10.1680186],[-10.2324022,10.1680786],[-10.2317536,10.1680701],[-10.231414,10.1680229],[-10.2309438,10.1678815],[-10.2305259,10.1678001],[-10.2299425,10.1678044],[-10.2292939,10.1679244],[-10.228902,10.1679801],[-10.2284885,10.1679501],[-10.2277832,10.1678944],[-10.2271476,10.1679029],[-10.2267123,10.1679415],[-10.2260157,10.1679929],[-10.2255673,10.1680658],[-10.225145,10.1683786],[-10.2244833,10.1692227],[-10.2240218,10.1699083],[-10.2236779,10.170534],[-10.2233993,10.1712067],[-10.2232252,10.1716438],[-10.2231642,10.1721494],[-10.2232077,10.1726422],[-10.2229944,10.1731264],[-10.2225242,10.1734906],[-10.2220454,10.1737477],[-10.2218582,10.1740905],[-10.2216318,10.1743862],[-10.2208351,10.1746433],[-10.2199731,10.1748875],[-10.2192983,10.1750932],[-10.2187237,10.1752603],[-10.2178661,10.1753803],[-10.2170084,10.1753932],[-10.2165295,10.1756031],[-10.2162422,10.1759888],[-10.2156458,10.1773728],[-10.2151408,10.1784226],[-10.2145792,10.1797381],[-10.2143964,10.1801794],[-10.2139175,10.180985],[-10.2136214,10.1817134],[-10.2134865,10.182429],[-10.2133254,10.1828704],[-10.2130686,10.183316],[-10.2126027,10.1836631],[-10.2120803,10.1838259],[-10.2113881,10.183783],[-10.2106263,10.1834274],[-10.209773,10.1830803],[-10.208898,10.1827418],[-10.2080534,10.182459],[-10.2073307,10.1823005],[-10.2068562,10.1822662],[-10.2063686,10.1824804],[-10.2062423,10.1828404],[-10.2063425,10.1831746],[-10.2068518,10.183813],[-10.2073394,10.1846743],[-10.2075919,10.1857541],[-10.2077095,10.1864054],[-10.2081579,10.1871723],[-10.2087108,10.1877636],[-10.2092419,10.1881236],[-10.2100603,10.1884706],[-10.2105523,10.1888263],[-10.2108135,10.1891605],[-10.2108788,10.1898161],[-10.2109049,10.1901717],[-10.2106872,10.1909344],[-10.210352,10.19156],[-10.2099776,10.1923741],[-10.2095902,10.1930168],[-10.2094745,10.193212],[-10.2092549,10.1935824],[-10.2089197,10.1940622],[-10.2084757,10.1945936],[-10.2082018,10.1948558],[-10.2078357,10.1952063],[-10.2073873,10.1955533],[-10.2070173,10.1958404],[-10.2065514,10.196346],[-10.2062685,10.1968216],[-10.2061988,10.1974472],[-10.2063381,10.1981541],[-10.2062119,10.1986212],[-10.2057896,10.1992853],[-10.2052367,10.1996795],[-10.2045837,10.1998123],[-10.2040917,10.199808],[-10.2034213,10.2000222],[-10.2030948,10.2005064],[-10.2028815,10.2009734],[-10.2026508,10.2015347],[-10.2023242,10.2022074],[-10.2019803,10.2029144],[-10.2019676,10.2031302],[-10.2019411,10.2035828],[-10.2020239,10.2042983],[-10.2024766,10.2049967],[-10.2029903,10.2055751],[-10.2033952,10.2059436],[-10.2039829,10.2061749],[-10.2046533,10.2062221],[-10.2050756,10.206282],[-10.205672,10.2065605],[-10.2060726,10.206899],[-10.2061248,10.2074903],[-10.2059681,10.2079916],[-10.2055414,10.2084286],[-10.2048754,10.2092127],[-10.204366,10.2098896],[-10.2042528,10.2104852],[-10.2043225,10.2109779],[-10.2046229,10.2115949],[-10.2051955,10.2121121],[-10.2053107,10.2122161],[-10.2062032,10.2127517],[-10.2067212,10.2129616],[-10.2072301,10.2128031],[-10.2077688,10.2124819],[-10.2080489,10.211973],[-10.2084768,10.2112853],[-10.2093695,10.2101946],[-10.209899,10.2096947],[-10.2105547,10.209416],[-10.2110872,10.2094221],[-10.211669,10.2096735],[-10.2124048,10.21024],[-10.2133006,10.2109581],[-10.2141348,10.2116215],[-10.214615,10.2120548],[-10.2150183,10.2126092],[-10.21544,10.2135272],[-10.2159818,10.2143482],[-10.2165944,10.215151],[-10.2170038,10.216072],[-10.2172193,10.2166779],[-10.2173486,10.2171656],[-10.2173979,10.2179533],[-10.2173117,10.2186562],[-10.2168684,10.2189955],[-10.2163143,10.2193711],[-10.215637,10.2200134],[-10.2150203,10.2210955],[-10.2147424,10.2215558],[-10.2145133,10.2221044],[-10.2142148,10.222533],[-10.2140021,10.2228361],[-10.2138156,10.2231302],[-10.2136749,10.2235171],[-10.2135512,10.2239011],[-10.2135328,10.2240978],[-10.2135488,10.2242747],[-10.2136239,10.2244489],[-10.2137493,10.2245424],[-10.2142579,10.224703],[-10.2150583,10.2244365],[-10.2159818,10.223879],[-10.2164005,10.2236003],[-10.2180628,10.2230308],[-10.2189247,10.2225461],[-10.219762,10.2223279],[-10.220784,10.2230792],[-10.2218799,10.2243637],[-10.2230743,10.2257694],[-10.2239732,10.2270781],[-10.2249583,10.2275265],[-10.2260296,10.2276113],[-10.2269777,10.2275629],[-10.22766,10.2278108],[-10.2277781,10.2278537],[-10.2281351,10.2287019],[-10.2285169,10.2297562],[-10.2285907,10.2312103],[-10.2289971,10.2326886],[-10.229071,10.2334641],[-10.2288863,10.234688],[-10.2284799,10.2353908],[-10.2286646,10.2363239],[-10.2291941,10.23716],[-10.2299083,10.2379718],[-10.2296497,10.2393411],[-10.2293049,10.2403226],[-10.2286893,10.2418494],[-10.2283691,10.2429278],[-10.2281844,10.2438729],[-10.2288616,10.2440789],[-10.230056,10.2441516],[-10.2311027,10.2438366],[-10.2323833,10.2434367],[-10.234218,10.2430126],[-10.2353754,10.2425643],[-10.2362989,10.2423825],[-10.2367176,10.2426733],[-10.2370131,10.2433277],[-10.2369023,10.2443455],[-10.2369516,10.2454118],[-10.237284,10.2469628],[-10.2373579,10.247811],[-10.2372224,10.2485259],[-10.2366191,10.24958],[-10.2363642,10.2499179],[-10.2357325,10.2507554],[-10.234846,10.2522094],[-10.2340825,10.2528758],[-10.232765,10.2539179],[-10.2312135,10.2550568],[-10.2304378,10.2557475],[-10.2301669,10.2562927],[-10.2303023,10.2570803],[-10.2309672,10.2573832],[-10.2317676,10.25788],[-10.2331467,10.2580618],[-10.2344519,10.2578316],[-10.2350676,10.2579285],[-10.235634,10.2582556],[-10.2363974,10.2591159],[-10.2369269,10.2595763],[-10.2378504,10.2592007],[-10.2397713,10.2583162],[-10.2411258,10.2578679],[-10.2417168,10.2579285],[-10.2421109,10.258607],[-10.2421355,10.2592128],[-10.2417907,10.259952],[-10.2415937,10.2605578],[-10.2410519,10.2618785],[-10.2405963,10.2628478],[-10.2398817,10.2640799],[-10.2396732,10.2646837],[-10.2398083,10.2654767],[-10.2397467,10.2660102],[-10.2391926,10.2668704],[-10.2382814,10.268288],[-10.2380228,10.2692452],[-10.2383676,10.2709657],[-10.2382198,10.2714261],[-10.2375426,10.2718138],[-10.2364221,10.2716442],[-10.2345381,10.2710263],[-10.2332575,10.2702872],[-10.2323094,10.2697177],[-10.2312997,10.2694875],[-10.2300807,10.2694269],[-10.2287385,10.2698146],[-10.2283198,10.2703478],[-10.2281721,10.271099],[-10.2281228,10.2719955],[-10.2278643,10.2735343],[-10.2275072,10.2746611],[-10.2270146,10.2756667],[-10.2262758,10.2774962],[-10.2259926,10.2785018],[-10.2262881,10.2796165],[-10.2274702,10.2816519],[-10.2287479,10.282621],[-10.2294367,10.2824084],[-10.2297473,10.2815047],[-10.2291531,10.2802953],[-10.2289775,10.2786606],[-10.2294367,10.277717],[-10.2305713,10.2772386],[-10.2306928,10.2767867],[-10.2304362,10.2760957],[-10.2307468,10.2758033],[-10.2321515,10.2752982],[-10.2332321,10.2749527],[-10.234056,10.2750324],[-10.2347718,10.2757767],[-10.235123,10.277119],[-10.2351365,10.2781689],[-10.2346908,10.2796042],[-10.2345913,10.2805832],[-10.2346721,10.2819645],[-10.2354795,10.2865121],[-10.2352986,10.2872059],[-10.2341483,10.2875301],[-10.2337047,10.2877546],[-10.2331082,10.2883791],[-10.2319715,10.2912525],[-10.2311031,10.2923206],[-10.2304777,10.2933221],[-10.2298602,10.2947353],[-10.2295636,10.2959447],[-10.2296126,10.297254],[-10.2294524,10.2986633],[-10.2293692,10.3007511],[-10.2291004,10.3018556],[-10.2284701,10.302905],[-10.2280909,10.3038709],[-10.2272664,10.3051778],[-10.2269234,10.3058321],[-10.2269902,10.3062524],[-10.2275315,10.306401],[-10.227989,10.3060729],[-10.2284992,10.3053306],[-10.2305799,10.3038255],[-10.2316423,10.3038634],[-10.2321429,10.3041727],[-10.2333132,10.3051566],[-10.234361,10.3065055],[-10.2349826,10.3080521],[-10.2357567,10.3086403],[-10.2363065,10.3097747],[-10.2365013,10.3119616],[-10.2367715,10.3125996],[-10.2378522,10.313211],[-10.2396793,10.3143022],[-10.2419416,10.3145363],[-10.2429979,10.3148871],[-10.243563,10.3152532],[-10.2437827,10.3157761],[-10.2436071,10.3167995],[-10.2431343,10.317464],[-10.2410649,10.3179108],[-10.2409716,10.3183496],[-10.2414456,10.3192316],[-10.2438503,10.3200025],[-10.2450526,10.3213049],[-10.2451927,10.3217298],[-10.2455524,10.3228201],[-10.2454578,10.3243883],[-10.2439178,10.3265148],[-10.2435395,10.327764],[-10.2432288,10.3287076],[-10.2423778,10.3293323],[-10.2410539,10.3313657],[-10.2403519,10.3327666],[-10.2401083,10.3332528],[-10.2384196,10.3340236],[-10.2370147,10.3344356],[-10.2332186,10.3342097],[-10.2313274,10.334635],[-10.2303817,10.3351799],[-10.2284094,10.3368145],[-10.2281461,10.3368433],[-10.2271936,10.3369474],[-10.2259913,10.3365354],[-10.2247215,10.3350071],[-10.2238028,10.3342762],[-10.2214583,10.3344411],[-10.2202741,10.3343689],[-10.2178368,10.3333243],[-10.2162895,10.3329899],[-10.2150824,10.3329356],[-10.2121207,10.3310758],[-10.2095562,10.3287514],[-10.2061465,10.3274318],[-10.2043903,10.3276577],[-10.2025058,10.3273321],[-10.2017493,10.3275846],[-10.2007024,10.3290798],[-10.199419,10.3311464],[-10.1987436,10.331565],[-10.1970955,10.3311862],[-10.1959269,10.331452],[-10.1934781,10.3312892],[-10.1926307,10.3312328],[-10.1906854,10.3313191],[-10.1889563,10.3311065],[-10.187119,10.3310135],[-10.1851467,10.3311862],[-10.1831406,10.3309204],[-10.1822625,10.3304686],[-10.1805942,10.3299303],[-10.1793243,10.3302294],[-10.1774803,10.330947],[-10.1753797,10.3312859],[-10.1736573,10.3314055],[-10.1721308,10.3316647],[-10.1714688,10.3321365],[-10.1714688,10.3330601],[-10.1711649,10.3344622],[-10.1707663,10.3352596],[-10.1699761,10.3356051],[-10.1691655,10.3370139],[-10.1684225,10.3378711],[-10.1675782,10.3390273],[-10.166842,10.3407815],[-10.1660584,10.3416719],[-10.1658355,10.3423364],[-10.1659504,10.3434859],[-10.1664907,10.3442301],[-10.1676728,10.3448215],[-10.1685036,10.3460043],[-10.1690034,10.3470143],[-10.1690102,10.3476854],[-10.1685779,10.3486754],[-10.1684473,10.3491085],[-10.1681591,10.3500642],[-10.1680091,10.3511087],[-10.1681861,10.3528748],[-10.1680382,10.3539491],[-10.1676871,10.3545316],[-10.1665353,10.3550773],[-10.1654138,10.3554087],[-10.1649187,10.3552235],[-10.1626981,10.354629],[-10.1618673,10.3546755],[-10.1609351,10.3549878],[-10.1604488,10.3554728],[-10.1601381,10.3571406],[-10.1594289,10.3576522],[-10.1582603,10.3582901],[-10.1577284,10.3587805],[-10.155194,10.3603943],[-10.1546339,10.3610688],[-10.1545195,10.3617651],[-10.1547491,10.362496],[-10.1552506,10.3630463],[-10.1593287,10.3649943],[-10.1609498,10.3658049],[-10.161651,10.366315],[-10.1617603,10.3677184],[-10.1623142,10.3690473],[-10.1623069,10.3700347],[-10.1620089,10.37141],[-10.1614686,10.3718194],[-10.1608921,10.371739],[-10.160218,10.3710383],[-10.1591932,10.3704184],[-10.158159,10.3703413],[-10.1572078,10.3705356],[-10.1565655,10.3707504],[-10.1554652,10.37192],[-10.1546335,10.3738625],[-10.1546475,10.3753093],[-10.1543048,10.377189],[-10.154044,10.3778541],[-10.1534598,10.3786594],[-10.1526012,10.3796779],[-10.1513043,10.3810465],[-10.1505478,10.3828537],[-10.1503046,10.3839964],[-10.149977,10.3859831],[-10.1494839,10.3875313],[-10.1497811,10.3886143],[-10.1507612,10.3905545],[-10.1507342,10.3922821],[-10.1515718,10.3941027],[-10.1515989,10.3957505],[-10.1507747,10.3969863],[-10.1494237,10.3972122],[-10.1482077,10.3970793],[-10.1466675,10.3960561],[-10.1449787,10.3945545],[-10.1440195,10.394209],[-10.1421415,10.3940096],[-10.1399933,10.3928934],[-10.1387504,10.3914183],[-10.1376425,10.3910728],[-10.1365346,10.3910728],[-10.1355789,10.3917507],[-10.1352234,10.392088],[-10.1345882,10.3947553],[-10.1339812,10.3968401],[-10.133171,10.3985083],[-10.1322518,10.399458],[-10.1305225,10.4002022],[-10.1298563,10.400967],[-10.1293857,10.4017568],[-10.1291424,10.4024302],[-10.1289552,10.4030725],[-10.1282797,10.4039096],[-10.1270773,10.4045342],[-10.1265098,10.4052385],[-10.1257938,10.4068065],[-10.1248788,10.4072698],[-10.1238656,10.4082176],[-10.1238469,10.408492],[-10.1238799,10.4086191],[-10.1240602,10.4088431],[-10.1246319,10.4091851],[-10.1253614,10.4101817],[-10.1254425,10.4120287],[-10.1258473,10.4127807],[-10.1264558,10.4134373],[-10.1275637,10.4143143],[-10.1286985,10.4142346],[-10.1293786,10.4137857],[-10.1299176,10.4131724],[-10.1305225,10.4126533],[-10.1318313,10.412348],[-10.1331948,10.412101],[-10.1358456,10.4114042],[-10.1377723,10.4109612],[-10.1403716,10.4099292],[-10.1411694,10.4097456],[-10.1419548,10.4096969],[-10.1421592,10.4099355],[-10.1422821,10.4102056],[-10.1426819,10.4117497],[-10.1422505,10.4127494],[-10.1407499,10.4153906],[-10.1406142,10.4158184],[-10.1405778,10.4162367],[-10.1404932,10.416653],[-10.1405338,10.4183538],[-10.1402396,10.4200837],[-10.1403165,10.420638],[-10.1404849,10.4211895],[-10.1407,10.4215533],[-10.1409861,10.4218246],[-10.1414444,10.4222181],[-10.1418333,10.4226692],[-10.1425738,10.423629],[-10.1429276,10.4240422],[-10.1430859,10.4242665],[-10.1432119,10.4244854],[-10.1435043,10.4249418],[-10.1438707,10.42533],[-10.144423,10.4257345],[-10.1449406,10.4261328],[-10.1459778,10.4269316],[-10.1462026,10.427151],[-10.1463783,10.4273937],[-10.1465419,10.4276602],[-10.1466267,10.4279514],[-10.146727,10.4286467],[-10.1471691,10.4292703],[-10.1479977,10.4297936],[-10.1490724,10.4300468],[-10.1494038,10.4304115],[-10.1496586,10.4308045],[-10.1501709,10.4315484],[-10.1511395,10.4330497],[-10.1520233,10.4352645],[-10.1529476,10.4362973],[-10.154689,10.4373091],[-10.155208,10.4382583],[-10.1555459,10.4398562],[-10.1548249,10.4416845],[-10.1538335,10.4432278],[-10.1522474,10.4447688],[-10.1511456,10.4453569],[-10.150472,10.4462101],[-10.150186,10.4480154],[-10.1503552,10.4489926],[-10.1508589,10.4500426],[-10.1516499,10.4511968],[-10.1519772,10.4528071],[-10.1517745,10.4537903],[-10.1509233,10.4551322],[-10.1501262,10.4549329],[-10.149194,10.45387],[-10.1467756,10.4506547],[-10.1456137,10.4496981],[-10.1445869,10.449326],[-10.1436277,10.4493792],[-10.1425603,10.4496582],[-10.1417497,10.4506945],[-10.138926,10.4523288],[-10.1366157,10.4529266],[-10.1323194,10.4525015],[-10.1313061,10.4521162],[-10.1297929,10.4512924],[-10.1278744,10.4506015],[-10.1257533,10.4491267],[-10.1246724,10.4477051],[-10.124186,10.445845],[-10.1233484,10.4453135],[-10.1224297,10.4452736],[-10.1208354,10.4450743],[-10.1197411,10.4441709],[-10.1187818,10.4439317],[-10.1179712,10.4443702],[-10.1161203,10.4464163],[-10.1145125,10.4484491],[-10.1135803,10.4490736],[-10.1125805,10.4494855],[-10.1120941,10.4501099],[-10.1120536,10.4507875],[-10.1130399,10.4520896],[-10.1132831,10.4529001],[-10.1133236,10.4538833],[-10.1134722,10.4552783],[-10.1130669,10.4566069],[-10.1134182,10.4577761],[-10.1147422,10.4593704],[-10.1156339,10.4600879],[-10.1161608,10.4621073],[-10.1165041,10.4645587],[-10.1155676,10.4682046],[-10.1148032,10.4694825],[-10.1147841,10.4706289],[-10.1155103,10.4710799],[-10.1170392,10.4718692],[-10.1177654,10.4732787],[-10.1176508,10.4744438],[-10.1172112,10.47497],[-10.1156632,10.4754774],[-10.1149943,10.4760036],[-10.114249,10.4777889],[-10.1135419,10.4782587],[-10.1104458,10.4788977],[-10.1091654,10.4790105],[-10.1084009,10.4793675],[-10.1081334,10.4799689],[-10.1082671,10.4802695],[-10.1085538,10.4805514],[-10.1105796,10.4807769],[-10.1114205,10.4813031],[-10.1133316,10.4827689],[-10.1148414,10.484028],[-10.1157588,10.4844226],[-10.1184152,10.4845354],[-10.1198486,10.4848173],[-10.1217024,10.4861515],[-10.122505,10.487016],[-10.1235562,10.4875609],[-10.1248175,10.4875045],[-10.1267477,10.4869972],[-10.1303024,10.4868844],[-10.1329971,10.487373],[-10.1352905,10.4888012],[-10.1358065,10.4895717],[-10.1361314,10.490718],[-10.1370678,10.4922025],[-10.1370869,10.4927475],[-10.1354242,10.4943448],[-10.1347745,10.4944011],[-10.1328442,10.4941568],[-10.1310095,10.4944951],[-10.1290793,10.4953219],[-10.1279517,10.4963555],[-10.127818,10.4971823],[-10.1281811,10.4981031],[-10.1286971,10.4983098],[-10.1301686,10.4988359],[-10.1315285,10.4992667],[-10.1327309,10.4999835],[-10.1334289,10.5005601],[-10.1340673,10.5012412],[-10.1345833,10.502425],[-10.1347745,10.5037592],[-10.1343725,10.5043137],[-10.1342207,10.5049012],[-10.1340968,10.5054945],[-10.1345069,10.5079684],[-10.135214,10.5092085],[-10.1374691,10.5120647],[-10.1380425,10.5131546],[-10.1387496,10.5177394],[-10.1382145,10.5207458],[-10.137281,10.5241342],[-10.1364562,10.5262888],[-10.1358829,10.5285623],[-10.1355608,10.5316208],[-10.1375754,10.5309144],[-10.1381816,10.5303343],[-10.1411441,10.5260962],[-10.1417622,10.5248969],[-10.1420755,10.5232192],[-10.1425866,10.5190859],[-10.1427927,10.514434],[-10.1427597,10.5100088],[-10.142463,10.5085012],[-10.1422899,10.5067912],[-10.1423064,10.505227],[-10.1424712,10.503922],[-10.1428669,10.5028523],[-10.1438313,10.5011988],[-10.1446474,10.4990429],[-10.1453892,10.4970976],[-10.1459086,10.4955415],[-10.1465268,10.4941069],[-10.1472027,10.4931342],[-10.1488843,10.4910187],[-10.1500218,10.4888061],[-10.150739,10.4875254],[-10.1511923,10.4865366],[-10.1517281,10.485491],[-10.1524041,10.4847371],[-10.1532861,10.4840726],[-10.1549293,10.4829907],[-10.1558734,10.4820306],[-10.157075,10.4802054],[-10.1582236,10.4789418],[-10.1589408,10.4777827],[-10.1596497,10.4765912],[-10.1599382,10.4756914],[-10.1608759,10.4742456],[-10.1617022,10.4735759],[-10.162815,10.473203],[-10.1639031,10.4727977],[-10.1648263,10.4726598],[-10.1680493,10.4724248],[-10.1684862,10.4724897],[-10.1692693,10.4727977],[-10.169937,10.4732759],[-10.1706789,10.4742568],[-10.171701,10.4758697],[-10.1719813,10.4763804],[-10.1723522,10.4770451],[-10.1727314,10.4773207],[-10.173193,10.4774018],[-10.1738689,10.4773855],[-10.174413,10.4772559],[-10.1748004,10.4770774],[-10.1758225,10.4769235],[-10.1767457,10.4769559],[-10.1773557,10.4770208],[-10.1779245,10.4769721],[-10.1782789,10.4768506],[-10.1787488,10.476348],[-10.1792269,10.4755537],[-10.1795731,10.4742891],[-10.1798616,10.4725789],[-10.18001,10.4713873],[-10.1798204,10.4705687],[-10.1795154,10.4695716],[-10.1792928,10.4685341],[-10.1791362,10.4665401],[-10.1791335,10.4654986],[-10.1793423,10.4644569],[-10.1794125,10.4636207],[-10.1795236,10.4627627],[-10.1795648,10.46226],[-10.1797957,10.4617008],[-10.1800429,10.4612793],[-10.1803067,10.4609389],[-10.1810651,10.4601931],[-10.1817245,10.4593663],[-10.182285,10.4588474],[-10.1827137,10.4585476],[-10.1832,10.4583368],[-10.1840161,10.4582639],[-10.1845849,10.4582475],[-10.1851784,10.4584179],[-10.1859944,10.4587826],[-10.1865632,10.4590906],[-10.187371,10.4592852],[-10.1879645,10.459269],[-10.1884673,10.4592366],[-10.1889372,10.4590583],[-10.1892339,10.4588313],[-10.1899181,10.4580855],[-10.1902808,10.4573884],[-10.1906188,10.4567398],[-10.1917645,10.4545998],[-10.1923003,10.4536758],[-10.1926053,10.4531327],[-10.1926053,10.4528003],[-10.1925394,10.4524841],[-10.1919803,10.4514738],[-10.1913786,10.4504524],[-10.1903812,10.4490825],[-10.1890046,10.4475178],[-10.1884111,10.4468775],[-10.1874219,10.4460669],[-10.186779,10.4457425],[-10.1863091,10.4454103],[-10.1854189,10.4444699],[-10.1845699,10.4431242],[-10.18414,10.4423123],[-10.1834323,10.441122],[-10.1830284,10.4407571],[-10.1827646,10.4405059],[-10.1825091,10.4401086],[-10.1824514,10.4397438],[-10.182608,10.4392655],[-10.1828058,10.4388602],[-10.1832262,10.4384225],[-10.1836054,10.4382278],[-10.1841824,10.4379766],[-10.1845946,10.4378388],[-10.1850727,10.4377657],[-10.1859217,10.4378712],[-10.1868779,10.437782],[-10.1879165,10.4375632],[-10.1886749,10.4372308],[-10.1893178,10.4369552],[-10.1898454,10.4368659],[-10.1908346,10.4370524],[-10.1922111,10.4375226],[-10.1928294,10.437936],[-10.1934476,10.4383819],[-10.193868,10.4389008],[-10.1943296,10.4401411],[-10.1945192,10.4411624],[-10.1950632,10.4427999],[-10.1957804,10.443943],[-10.1963327,10.4445672],[-10.1970003,10.4452886],[-10.1982255,10.4474676],[-10.1985152,10.4482484],[-10.1988102,10.4491716],[-10.1993842,10.4502899],[-10.200347,10.4522034],[-10.2012242,10.4534393],[-10.201943,10.4545578],[-10.2022005,10.4550959],[-10.202449,10.4555837],[-10.2026138,10.4560457],[-10.2032733,10.4566698],[-10.2040234,10.4571482],[-10.204823,10.4578291],[-10.2054742,10.4588585],[-10.2057709,10.4596611],[-10.2063182,10.4620916],[-10.2067468,10.4636804],[-10.2072249,10.4649449],[-10.207769,10.466096],[-10.2086262,10.4672712],[-10.210654,10.4692166],[-10.2113217,10.4700597],[-10.2120718,10.4713728],[-10.2128632,10.4731237],[-10.2135721,10.4743963],[-10.2144541,10.4753365],[-10.215369,10.4760823],[-10.2183131,10.4775474],[-10.2194576,10.4781168],[-10.2206858,10.4785869],[-10.2220789,10.4789029],[-10.2229938,10.479211],[-10.2237934,10.4794542],[-10.2243375,10.4795191],[-10.2253184,10.4795191],[-10.2268516,10.4793568],[-10.2302477,10.4791056],[-10.2308818,10.4788129],[-10.2314842,10.4782141],[-10.2318716,10.4777115],[-10.2322508,10.4772657],[-10.2324898,10.4769576],[-10.2329267,10.4766578],[-10.2334625,10.4765362],[-10.2338582,10.4766091],[-10.2342126,10.476828],[-10.2346083,10.4772009],[-10.2347979,10.477606],[-10.2350039,10.4781897],[-10.2350864,10.4789598],[-10.2349545,10.4796649],[-10.2344924,10.4809497],[-10.2336521,10.4825504],[-10.2329762,10.4838555],[-10.2319293,10.4852657],[-10.2314265,10.4861169],[-10.2305774,10.4881188],[-10.2303219,10.4893023],[-10.2300993,10.490437],[-10.2297779,10.4915311],[-10.229613,10.4921067],[-10.2295306,10.4928605],[-10.2295883,10.4940032],[-10.2298438,10.4945788],[-10.2302972,10.4955109],[-10.2309813,10.4962645],[-10.2319293,10.4970589],[-10.2322755,10.497756],[-10.232292,10.4982666],[-10.2320942,10.4988419],[-10.2315254,10.499839],[-10.2309978,10.5007467],[-10.2299674,10.5019543],[-10.2296377,10.5023515],[-10.2283353,10.503397],[-10.227239,10.5039724],[-10.2213617,10.5064769],[-10.2194988,10.5070037],[-10.2175287,10.5074494],[-10.2168445,10.5077899],[-10.2158307,10.5084302],[-10.2148827,10.5091595],[-10.2144953,10.5095243],[-10.2142397,10.5100349],[-10.2139512,10.5109588],[-10.2136133,10.512061],[-10.2135061,10.5130174],[-10.2135308,10.5138603],[-10.2135556,10.5145491],[-10.2137616,10.5153191],[-10.2143468,10.516162],[-10.215487,10.517369],[-10.2163442,10.5179932],[-10.2170943,10.5182687],[-10.2179681,10.5183174],[-10.2193117,10.5181553],[-10.2202432,10.5179932],[-10.2215539,10.5175959],[-10.224678,10.5167207],[-10.2289231,10.515189],[-10.232039,10.514492],[-10.2339102,10.5137301],[-10.2356248,10.5131709],[-10.2378174,10.5126685],[-10.2395402,10.5124172],[-10.2430847,10.5120525],[-10.2450548,10.5119146],[-10.248385,10.5124983],[-10.2514019,10.5126521],[-10.2552679,10.5128386],[-10.256661,10.5126685],[-10.2590432,10.5123685],[-10.2596367,10.5122794],[-10.2605022,10.5122227],[-10.261104,10.5121984],[-10.2619612,10.5122875],[-10.2629339,10.5127413],[-10.2648051,10.5134222],[-10.2665856,10.5138598],[-10.2680611,10.5144027],[-10.2688442,10.5147594],[-10.2697096,10.5150188],[-10.2705421,10.515189],[-10.2711768,10.5152619],[-10.2717787,10.5151484],[-10.2725947,10.514727],[-10.2730481,10.5143542],[-10.2734603,10.5140624],[-10.2741527,10.5137545],[-10.2745648,10.5136491],[-10.2750347,10.5136733],[-10.2757518,10.5138517],[-10.2782907,10.5149782],[-10.2821484,10.5166072],[-10.2837557,10.5173691],[-10.2844069,10.5178797],[-10.2850581,10.5183255],[-10.2860639,10.5186252],[-10.2867891,10.5187631],[-10.2875228,10.5187712],[-10.2881163,10.5186821],[-10.2888417,10.5186821],[-10.2896824,10.5188279],[-10.2901112,10.5191439],[-10.2904243,10.5196384],[-10.2908392,10.5213819],[-10.2911745,10.523034],[-10.2918174,10.5254898],[-10.2921306,10.5264299],[-10.2921554,10.5271836],[-10.2920152,10.5283182],[-10.2915866,10.5292664],[-10.2910673,10.5306603],[-10.2908612,10.5326053],[-10.2912734,10.5355714],[-10.291257,10.5363088],[-10.2910591,10.5369005],[-10.2908943,10.537411],[-10.2907541,10.5384483],[-10.2907541,10.5393235],[-10.2908613,10.5400609],[-10.2916691,10.5446072],[-10.2918587,10.5454744],[-10.2918587,10.5465684],[-10.2920071,10.5475327],[-10.2922049,10.5478326],[-10.2927737,10.5482621],[-10.2932022,10.5485133],[-10.2936969,10.548578],[-10.2941996,10.548643],[-10.2948673,10.5486511],[-10.2953373,10.5484566],[-10.2960297,10.5480109],[-10.2964666,10.5476138],[-10.2968375,10.5470789],[-10.2974804,10.546463],[-10.2981316,10.5458391],[-10.2987251,10.545296],[-10.2996072,10.5445263],[-10.3002171,10.5436429],[-10.3007117,10.5428406],[-10.301808,10.5412846],[-10.3025417,10.5404095],[-10.3031269,10.5395505],[-10.3034154,10.5387724],[-10.3036462,10.5379054],[-10.3039347,10.5366329],[-10.304248,10.5357254],[-10.3046849,10.5350122],[-10.3049569,10.5347609],[-10.3058306,10.5339992],[-10.3064077,10.5333266],[-10.3069681,10.5323622],[-10.3074133,10.5315192],[-10.3082375,10.5295824],[-10.3085591,10.5287314],[-10.3086909,10.527686],[-10.3089134,10.5270134],[-10.3092927,10.5264055],[-10.3102241,10.5254006],[-10.3110485,10.5246873],[-10.3114935,10.5243146],[-10.3119387,10.5241606],[-10.3133482,10.5240715],[-10.3143621,10.5239905],[-10.3152276,10.5236663],[-10.3161097,10.5231961],[-10.3174616,10.5219805],[-10.3184094,10.5212917],[-10.3192256,10.5209269],[-10.3210802,10.5204406],[-10.3234048,10.5198895],[-10.3258282,10.5194033],[-10.3286391,10.5186252],[-10.3302052,10.5181796],[-10.3308234,10.5178392],[-10.3313262,10.5173691],[-10.3317302,10.5169476],[-10.3323649,10.5160967],[-10.332744,10.5155294],[-10.3330079,10.5149133],[-10.333148,10.5141516],[-10.3331068,10.513406],[-10.332876,10.5121984],[-10.3325793,10.5113878],[-10.331433,10.5097624],[-10.3306911,10.5089115],[-10.3304026,10.5083037],[-10.3302377,10.5077444],[-10.3304191,10.5071204],[-10.3306911,10.5064881],[-10.3312681,10.5054994],[-10.3322208,10.5039891],[-10.3329579,10.5034651],[-10.3337163,10.5030355],[-10.334112,10.5028814],[-10.3348538,10.5028248],[-10.3358677,10.5028977],[-10.3364942,10.5030273],[-10.3370781,10.5032286],[-10.3374586,10.5033597],[-10.3385714,10.5039026],[-10.3411515,10.5046645],[-10.342965,10.5048105],[-10.3442179,10.50477],[-10.3454626,10.5045672],[-10.3499056,10.5028571],[-10.3504002,10.5026546],[-10.3512575,10.5024114],[-10.3518427,10.502144],[-10.3522054,10.5019089],[-10.3527,10.5017792],[-10.3531616,10.5019414],[-10.353698,10.5021568],[-10.354126,10.5025168],[-10.3543981,10.5029868],[-10.3545382,10.5035785],[-10.3546542,10.5044418],[-10.3545432,10.5054501],[-10.3536067,10.5074364],[-10.3526341,10.5091141],[-10.3519993,10.510192],[-10.3510844,10.5122507],[-10.3505898,10.5136042],[-10.3504579,10.5142443],[-10.3505155,10.5150549],[-10.3510925,10.51747],[-10.3513234,10.5190665],[-10.3518179,10.5207443],[-10.3519992,10.5214899],[-10.352057,10.5227216],[-10.3524279,10.5240671],[-10.3528483,10.5247803],[-10.3535984,10.5255745],[-10.3541424,10.5260121],[-10.3547194,10.5262877],[-10.3552801,10.5265226],[-10.3559394,10.5269198],[-10.3564917,10.5274709],[-10.3577199,10.5290593],[-10.3583711,10.5297725],[-10.3589976,10.5301777],[-10.3599044,10.5304694],[-10.3627894,10.5310935],[-10.3641412,10.531288],[-10.3649078,10.5312961],[-10.3652293,10.5311988],[-10.3661278,10.5308828],[-10.3668449,10.530664],[-10.3685843,10.5308989],[-10.3701504,10.5312231],[-10.3738269,10.5321955],[-10.3765552,10.5325927],[-10.3781132,10.5325765],[-10.3790117,10.5323172],[-10.3796464,10.5318472],[-10.3800997,10.5312961],[-10.3803801,10.5308584],[-10.3807427,10.5300318],[-10.3808416,10.528954],[-10.3808334,10.5280139],[-10.3804213,10.5265064],[-10.3798031,10.5246748],[-10.3797618,10.5239941],[-10.3797865,10.5234349],[-10.3800338,10.5226488],[-10.3803058,10.5219356],[-10.3808251,10.5214656],[-10.3813444,10.5211171],[-10.3819463,10.5208171],[-10.3824078,10.5205254],[-10.3831991,10.5203796],[-10.3837597,10.5204443],[-10.3844191,10.5208415],[-10.3850951,10.5214574],[-10.386686,10.5233943],[-10.3884995,10.5253799],[-10.3908735,10.5288242],[-10.3924478,10.5305424],[-10.3937338,10.5318065],[-10.3946984,10.532835],[-10.3953,10.5334761],[-10.3967425,10.5347645],[-10.3978306,10.535648],[-10.3988692,10.5364503],[-10.399471,10.5365961],[-10.4002705,10.5361667],[-10.4007404,10.535648],[-10.4010783,10.5352428],[-10.4017625,10.5347645],[-10.4021603,10.5345357],[-10.402694,10.5339056],[-10.4030072,10.5330466],[-10.4031886,10.5316607],[-10.4037325,10.5290593],[-10.4040541,10.5271142],[-10.4045347,10.525659],[-10.4047795,10.5249179],[-10.4053234,10.5237105],[-10.4063127,10.5218139],[-10.406634,10.5209631],[-10.4067001,10.5197959],[-10.4060406,10.5169999],[-10.4057372,10.5161995],[-10.4054475,10.515535],[-10.405056,10.5148228],[-10.4050762,10.5140418],[-10.4055213,10.5135555],[-10.4060983,10.5130448],[-10.4090411,10.5118129],[-10.4126021,10.5103298],[-10.4144733,10.5093654],[-10.4156603,10.508417],[-10.4174832,10.5077332],[-10.4183392,10.507412],[-10.4197818,10.506861],[-10.4205896,10.506788],[-10.4223866,10.5070798],[-10.4237467,10.5069178],[-10.4248849,10.5067444],[-10.424895,10.5067429],[-10.4412931,10.5030794],[-10.4482965,10.5183492],[-10.4500256,10.5221193],[-10.4731099,10.5572929],[-10.4767801,10.5617441],[-10.4768506,10.5618295],[-10.5261407,10.6216],[-10.5757023,10.677127],[-10.6222901,10.7092696],[-10.675321,10.7725708],[-10.7486721,10.8085979],[-10.8344136,10.8270966],[-10.88794,10.8392661],[-10.8924006,10.8694445],[-10.8676198,10.9059466],[-10.8190495,10.9229794],[-10.8026942,10.9482834],[-10.801914,10.9514478],[-10.8017376,10.9521632],[-10.8007523,10.9561587],[-10.791295,10.9945063],[-10.7362817,11.0446134],[-10.7080316,11.0733117],[-10.6758166,11.1234054],[-10.7047203,11.1348186]]]]}]}
