# Supplementary material
Source: ML conference proceedings conference paper supplement (https://proceedings.neurips.cc/paper_files/paper/2022/hash/9d3faa41886997cfc2128b930077fa49-Abstract.html)
Supplement: Supplementary file 1 [file 9d3faa41886997cfc2128b930077fa49-Supplemental-Conference.zip › code/ebola/map/geojson/lofa.geojson]

{"type":"GeometryCollection","geometries":[{"type":"MultiPolygon","coordinates":[[[[-10.6051653,8.0405416],[-10.6047872,8.040851],[-10.604584,8.0410484],[-10.604485,8.041135],[-10.6043529,8.0412016],[-10.6041558,8.0412521],[-10.6040183,8.041313],[-10.6038742,8.0414291],[-10.6033867,8.0418725],[-10.6027326,8.0420627],[-10.60233,8.0421614],[-10.6018081,8.0422371],[-10.6012217,8.0422544],[-10.6006552,8.042275],[-10.5998801,8.0421437],[-10.5989145,8.0419352],[-10.5983377,8.0417827],[-10.5976146,8.0419092],[-10.596728,8.0421608],[-10.5964525,8.0423756],[-10.5962432,8.0425533],[-10.5956751,8.0431378],[-10.5951998,8.0434884],[-10.5946776,8.043809],[-10.5938822,8.0442186],[-10.5934665,8.0444049],[-10.5929795,8.044604],[-10.5922368,8.0446596],[-10.5913781,8.0447276],[-10.5905869,8.0449411],[-10.5898439,8.0451153],[-10.5890752,8.0452764],[-10.5884892,8.0454946],[-10.5877273,8.0459135],[-10.5872093,8.0461971],[-10.5865154,8.0465473],[-10.5857254,8.0467865],[-10.5849786,8.0469325],[-10.5842478,8.0471072],[-10.5833731,8.0471646],[-10.5824509,8.0472086],[-10.5817348,8.0473089],[-10.5814446,8.0473935],[-10.5805701,8.047727],[-10.5798403,8.0479032],[-10.5792809,8.0481283],[-10.578653,8.0481889],[-10.5778704,8.0480731],[-10.5770283,8.0482793],[-10.576332,8.0481461],[-10.5757841,8.0480992],[-10.5756324,8.0483866],[-10.5750944,8.049112],[-10.5749833,8.0492155],[-10.5746927,8.049705],[-10.5741421,8.0503236],[-10.5736663,8.0505926],[-10.5733976,8.051156],[-10.5732817,8.0517454],[-10.5730683,8.0521727],[-10.5728488,8.0524352],[-10.5727372,8.0526367],[-10.5728098,8.052939],[-10.5726705,8.0532947],[-10.5723334,8.0538424],[-10.5719666,8.0542256],[-10.5713921,8.0547566],[-10.5710962,8.0550381],[-10.5709551,8.055159],[-10.5704649,8.0557364],[-10.5703356,8.0561086],[-10.5702887,8.0566335],[-10.5701418,8.0570869],[-10.5700881,8.0572238],[-10.5698317,8.0573851],[-10.5693559,8.0574485],[-10.5691724,8.0577025],[-10.5690575,8.0580444],[-10.5688771,8.0582298],[-10.5687942,8.0585912],[-10.5685923,8.0588619],[-10.5682531,8.059217],[-10.5679996,8.0596478],[-10.567773,8.0603093],[-10.5674046,8.0608057],[-10.5670545,8.0612339],[-10.5665398,8.0614775],[-10.5662231,8.0618799],[-10.5655864,8.0627349],[-10.5653487,8.0630915],[-10.5651247,8.0637014],[-10.5645784,8.0642071],[-10.5644257,8.0647027],[-10.5642255,8.0653756],[-10.5639462,8.0658033],[-10.5636828,8.0662988],[-10.5632192,8.0667943],[-10.5630875,8.0670552],[-10.562861,8.0679471],[-10.5625027,8.0687504],[-10.5621972,8.069199],[-10.5618863,8.0696059],[-10.5614754,8.0700701],[-10.5609486,8.0706491],[-10.5608327,8.0709986],[-10.5607537,8.0717445],[-10.5605271,8.0725373],[-10.5604534,8.0729963],[-10.5603269,8.0735492],[-10.5598844,8.0739248],[-10.5594313,8.0743369],[-10.5593207,8.074822],[-10.5588623,8.0753123],[-10.5584356,8.0759486],[-10.5579246,8.0765641],[-10.5576928,8.0768614],[-10.5573978,8.0774561],[-10.5572936,8.0775943],[-10.5569131,8.0775186],[-10.5565654,8.0777847],[-10.5563599,8.0786244],[-10.5560175,8.0793443],[-10.5556329,8.0798867],[-10.5549269,8.0809247],[-10.5544317,8.0815141],[-10.5538943,8.0820879],[-10.5532832,8.0825156],[-10.5528143,8.0827242],[-10.5521716,8.0830111],[-10.5518344,8.0833345],[-10.5514319,8.0837773],[-10.5513359,8.0842185],[-10.5504168,8.0845099],[-10.5497271,8.0846854],[-10.5491476,8.0849618],[-10.5486629,8.0854521],[-10.5485839,8.0859529],[-10.5485049,8.0865005],[-10.5479359,8.0869648],[-10.547172,8.0873664],[-10.5465661,8.0880132],[-10.5462816,8.0884148],[-10.5458655,8.0887486],[-10.5455072,8.0890824],[-10.5452122,8.0894006],[-10.5445273,8.0897813],[-10.5439847,8.0899795],[-10.5434789,8.0902195],[-10.5433051,8.0905116],[-10.5432102,8.0911635],[-10.5432998,8.0914921],[-10.5434631,8.0920189],[-10.5435316,8.0925979],[-10.5433894,8.0931664],[-10.543068,8.0938706],[-10.542204,8.0944391],[-10.5414032,8.0950128],[-10.540771,8.095524],[-10.5406709,8.0960925],[-10.5396752,8.0974851],[-10.5390114,8.097918],[-10.5384055,8.0981788],[-10.5379367,8.0986691],[-10.5374678,8.0990707],[-10.5366617,8.1000513],[-10.5365616,8.1005363],[-10.5367355,8.1010214],[-10.5367092,8.1017568],[-10.5366565,8.1025079],[-10.5364194,8.1032641],[-10.5359979,8.1039787],[-10.5358557,8.1049123],[-10.5356924,8.1056529],[-10.5353341,8.1063362],[-10.5356186,8.1068317],[-10.5357134,8.1073793],[-10.5352393,8.107734],[-10.5348969,8.1076766],[-10.5346756,8.1072385],[-10.5339749,8.1070403],[-10.5334692,8.1069047],[-10.5329371,8.1071759],[-10.5324892,8.1077079],[-10.5317517,8.1082973],[-10.5310721,8.1087875],[-10.530756,8.1092621],[-10.5312038,8.1099193],[-10.531699,8.110493],[-10.5319045,8.1109989],[-10.5317728,8.1113692],[-10.5314672,8.1116561],[-10.5307823,8.1117969],[-10.5303556,8.112089],[-10.5303134,8.1124854],[-10.5305452,8.1128453],[-10.5308034,8.1131999],[-10.5314198,8.1130226],[-10.5315831,8.1131008],[-10.5315936,8.1135702],[-10.5313566,8.1141804],[-10.5309983,8.114582],[-10.5307507,8.1150149],[-10.530403,8.1155834],[-10.5297287,8.1160215],[-10.5292334,8.1164648],[-10.5290934,8.1168172],[-10.5288811,8.117374],[-10.5285645,8.1178756],[-10.5283633,8.1182112],[-10.5281063,8.1186132],[-10.5275326,8.1190373],[-10.5270557,8.1193212],[-10.5267279,8.1190152],[-10.5264485,8.118982],[-10.5262325,8.1192696],[-10.5259568,8.1196605],[-10.5254353,8.1199261],[-10.5249174,8.1201031],[-10.5246073,8.120419],[-10.5243019,8.1208431],[-10.523989,8.1212192],[-10.5237692,8.1216434],[-10.5236947,8.1223109],[-10.5237207,8.1227055],[-10.523825,8.1229452],[-10.5241715,8.1232291],[-10.5246371,8.1236422],[-10.525032,8.1240331],[-10.5253896,8.1243613],[-10.5258069,8.1245457],[-10.5263396,8.1246268],[-10.5269468,8.124778],[-10.5272336,8.1247338],[-10.5276024,8.1246158],[-10.5278967,8.1247043],[-10.5281575,8.1251431],[-10.5280644,8.1254271],[-10.5276434,8.1258254],[-10.5272187,8.126113],[-10.5265519,8.1262274],[-10.5259931,8.1264118],[-10.5258106,8.1266994],[-10.5255871,8.1273116],[-10.5253375,8.1277984],[-10.5251624,8.1283442],[-10.5248942,8.1286687],[-10.5245738,8.1289084],[-10.5243429,8.1291924],[-10.5238399,8.1293989],[-10.5233333,8.1294653],[-10.522808,8.1293657],[-10.5223722,8.1291076],[-10.5220444,8.1289896],[-10.5217985,8.1291555],[-10.5214148,8.1294948],[-10.5212658,8.1298193],[-10.5208523,8.1302434],[-10.5203196,8.1306306],[-10.5197273,8.1311285],[-10.5190232,8.1316669],[-10.5181329,8.1320504],[-10.5176672,8.1323897],[-10.5173245,8.1327142],[-10.5168924,8.1331678],[-10.5163336,8.1334518],[-10.5160057,8.1337726],[-10.5153613,8.1340566],[-10.5151117,8.1343737],[-10.5145939,8.1345913],[-10.5142884,8.1350228],[-10.5139755,8.1353879],[-10.5133943,8.1358894],[-10.5128765,8.1362914],[-10.5122209,8.1369736],[-10.511636,8.1375821],[-10.5110661,8.1379066],[-10.5105073,8.1383639],[-10.5099708,8.1388322],[-10.509602,8.139201],[-10.5091401,8.1396177],[-10.5087601,8.1398758],[-10.5084062,8.1400344],[-10.5080672,8.1403774],[-10.5075196,8.1407498],[-10.5070242,8.141185],[-10.5063536,8.1416238],[-10.5060407,8.1419963],[-10.5058805,8.1425162],[-10.5055154,8.1428592],[-10.5048524,8.1432206],[-10.5043457,8.1434087],[-10.5038056,8.1436152],[-10.5028519,8.1437885],[-10.5021441,8.1440503],[-10.5014698,8.1442273],[-10.5012128,8.144467],[-10.5010601,8.1447215],[-10.5012389,8.1452156],[-10.5011122,8.1454221],[-10.5003895,8.1456323],[-10.4995476,8.1458536],[-10.4988398,8.1459015],[-10.4982028,8.1459273],[-10.4971001,8.146167],[-10.4966307,8.1462371],[-10.4962545,8.1460158],[-10.49618,8.1458204],[-10.4959416,8.1456434],[-10.4954238,8.1457503],[-10.4952235,8.1459634],[-10.4948574,8.1461068],[-10.4942252,8.1462059],[-10.4936931,8.1463024],[-10.4931663,8.1462242],[-10.4928159,8.1460547],[-10.4923813,8.1459921],[-10.491915,8.1459426],[-10.4916674,8.1461512],[-10.4913882,8.1463754],[-10.4910985,8.1464719],[-10.4906954,8.1464745],[-10.4903793,8.1464015],[-10.4899921,8.1464589],[-10.4895733,8.1465684],[-10.4891149,8.1468317],[-10.4888278,8.1469856],[-10.4884064,8.1470117],[-10.4879823,8.1470795],[-10.4876662,8.1472828],[-10.4872948,8.1472281],[-10.4868798,8.1472207],[-10.4864011,8.1472576],[-10.4861869,8.1472005],[-10.4858759,8.1470677],[-10.4854885,8.1470677],[-10.4848061,8.1471671],[-10.4846981,8.1473994],[-10.4847167,8.1476428],[-10.484903,8.1481922],[-10.4848545,8.1485905],[-10.4846943,8.1489814],[-10.4847279,8.1494018],[-10.4843553,8.1495751],[-10.4838077,8.149446],[-10.4834538,8.1493981],[-10.4826529,8.1496452],[-10.481893,8.1497816],[-10.4814832,8.1500361],[-10.4808797,8.1501024],[-10.4802091,8.150202],[-10.4797584,8.150486],[-10.4795013,8.1507883],[-10.4792443,8.1510612],[-10.4790208,8.1509764],[-10.4786781,8.1505781],[-10.4783763,8.1501246],[-10.4781342,8.1499844],[-10.4778287,8.1499291],[-10.4772438,8.1501246],[-10.4768229,8.1502463],[-10.4764057,8.1502204],[-10.4760927,8.1499955],[-10.4756085,8.1499844],[-10.4750422,8.1502868],[-10.4746399,8.1505339],[-10.4738986,8.1508068],[-10.4731684,8.1510391],[-10.4726283,8.151146],[-10.4724644,8.1513562],[-10.4725277,8.1517176],[-10.4726283,8.1522449],[-10.4726096,8.15254],[-10.4727251,8.1531115],[-10.4725277,8.1533992],[-10.4720881,8.1537015],[-10.4718758,8.153838],[-10.4713878,8.1536389],[-10.4708625,8.1534508],[-10.4706353,8.1535135],[-10.4704527,8.1536831],[-10.4704788,8.1539818],[-10.470516,8.1542436],[-10.4704564,8.1546824],[-10.4702069,8.1549774],[-10.4698194,8.1550696],[-10.4694171,8.1549406],[-10.4690744,8.1545423],[-10.4688509,8.1543432],[-10.4684523,8.154428],[-10.4677668,8.1546603],[-10.4673868,8.154841],[-10.4668653,8.1549627],[-10.4665189,8.1552761],[-10.4661612,8.1556449],[-10.4659116,8.1559325],[-10.465662,8.1559362],[-10.465364,8.1558514],[-10.4648462,8.1558625],[-10.4643992,8.1561169],[-10.4640378,8.1562017],[-10.4635349,8.1562644],[-10.4630805,8.1564193],[-10.4628234,8.1566258],[-10.4625962,8.157083],[-10.4624174,8.1575661],[-10.4621305,8.1578058],[-10.4618995,8.1580086],[-10.4616574,8.158016],[-10.4614898,8.1578796],[-10.4614935,8.1576472],[-10.46165,8.1573744],[-10.4618399,8.1571752],[-10.4619033,8.1568876],[-10.4618325,8.1565963],[-10.4617319,8.1561907],[-10.4614115,8.1559547],[-10.4609235,8.155667],[-10.4605808,8.1556523],[-10.4598842,8.1558072],[-10.4593627,8.1560395],[-10.4591317,8.1561722],[-10.4587517,8.1562497],[-10.4583792,8.1559878],[-10.4581929,8.1557592],[-10.4580476,8.1555601],[-10.4577645,8.1555416],[-10.4575671,8.1556043],[-10.4574702,8.1560542],[-10.4573771,8.156375],[-10.4571163,8.1564709],[-10.4568071,8.156541],[-10.4564681,8.1565705],[-10.4563601,8.1563013],[-10.4562968,8.1558035],[-10.4561031,8.1554458],[-10.4558944,8.1554015],[-10.4556672,8.1555785],[-10.4553617,8.1559694],[-10.4551531,8.1562238],[-10.4547918,8.156257],[-10.4543857,8.1560911],[-10.4539908,8.1559805],[-10.4536705,8.155903],[-10.4533315,8.1559583],[-10.4529627,8.1560653],[-10.4525976,8.1561243],[-10.4520984,8.1560432],[-10.4516588,8.1559694],[-10.4512006,8.1560321],[-10.4506977,8.1558846],[-10.4501613,8.1559362],[-10.4498521,8.1561648],[-10.4496472,8.1563603],[-10.4491885,8.1566488],[-10.4487974,8.1572136],[-10.4485731,8.1579179],[-10.4485218,8.1587936],[-10.4482974,8.1590474],[-10.4478807,8.159187],[-10.447541,8.1590474],[-10.4472269,8.1583812],[-10.4470666,8.1577022],[-10.4465858,8.1571755],[-10.445932,8.1567694],[-10.4457333,8.1565346],[-10.4453999,8.1557097],[-10.4451691,8.1554495],[-10.4448614,8.1555764],[-10.4445089,8.1557985],[-10.444105,8.1557351],[-10.443996,8.1553988],[-10.4436755,8.1547388],[-10.4424547,8.1544683],[-10.442387,8.1544533],[-10.4418165,8.1543263],[-10.441528,8.154504],[-10.4411114,8.1550815],[-10.440637,8.1553607],[-10.4402395,8.155329],[-10.4396562,8.1547388],[-10.4392395,8.1541423],[-10.4391241,8.1536537],[-10.4392652,8.1532349],[-10.4391241,8.1529113],[-10.4383228,8.1530509],[-10.437842,8.1536474],[-10.4370023,8.1542502],[-10.4357074,8.1543644],[-10.4347651,8.154688],[-10.4343035,8.1551195],[-10.4337458,8.1550497],[-10.4332714,8.1547452],[-10.4328291,8.1537933],[-10.431906,8.152778],[-10.4310598,8.15175],[-10.4307265,8.1512551],[-10.4298034,8.1509759],[-10.4287777,8.1502398],[-10.427361,8.1494275],[-10.426906,8.1492941],[-10.426628,8.1491711],[-10.426411,8.1488781],[-10.425303,8.1490061],[-10.424533,8.1491631],[-10.423086,8.1490911],[-10.421992,8.1491881],[-10.420746,8.1494091],[-10.419699,8.1494741],[-10.418081,8.1493251],[-10.417481,8.1494361],[-10.417003,8.1492211],[-10.416462,8.1488661],[-10.416185,8.1487901],[-10.415924,8.1489451],[-10.41557,8.1492411],[-10.414339,8.1495241],[-10.413292,8.1495281],[-10.412706,8.1494221],[-10.411827,8.1490221],[-10.411319,8.1491171],[-10.409858,8.1495551],[-10.409165,8.1496041],[-10.40858,8.1495441],[-10.408041,8.1496541],[-10.40721,8.1497511],[-10.406625,8.1499071],[-10.406147,8.1498631],[-10.40567,8.1500661],[-10.404531,8.1501471],[-10.404161,8.1500551],[-10.403605,8.1496701],[-10.403313,8.1498571],[-10.403037,8.1502921],[-10.402777,8.1504791],[-10.402453,8.1506041],[-10.402101,8.1510231],[-10.4017,8.1509781],[-10.400885,8.1511211],[-10.40073,8.1509191],[-10.400513,8.1504551],[-10.400419,8.1500371],[-10.400249,8.1498371],[-10.400156,8.1496051],[-10.400201,8.1494501],[-10.400062,8.1491871],[-10.3998,8.1491721],[-10.399647,8.1493121],[-10.399616,8.1494831],[-10.399232,8.1496701],[-10.398258,8.1487901],[-10.397887,8.1483421],[-10.397732,8.1480021],[-10.397408,8.1477401],[-10.397145,8.1476011],[-10.396868,8.1476641],[-10.396884,8.1479111],[-10.396993,8.1480351],[-10.397332,8.1481581],[-10.397471,8.1483591],[-10.397534,8.1486841],[-10.397151,8.1492591],[-10.396813,8.1493841],[-10.396352,8.1496641],[-10.39606,8.1500061],[-10.395939,8.1504871],[-10.395925,8.1509051],[-10.395772,8.1512151],[-10.395325,8.1512011],[-10.395047,8.1509391],[-10.394416,8.1510191],[-10.393677,8.1511761],[-10.393369,8.1511621],[-10.392937,8.1509001],[-10.392336,8.1507781],[-10.391241,8.1504571],[-10.390995,8.1504731],[-10.390671,8.1502571],[-10.390517,8.1503191],[-10.390333,8.1505061],[-10.390026,8.1507091],[-10.389748,8.1505541],[-10.389731,8.1501051],[-10.389592,8.1498891],[-10.389283,8.1497811],[-10.388852,8.1498451],[-10.388314,8.1500791],[-10.388176,8.1503121],[-10.388238,8.1505751],[-10.388085,8.1509321],[-10.387825,8.1512121],[-10.387394,8.1514771],[-10.386979,8.1515871],[-10.386594,8.1515731],[-10.386271,8.1517291],[-10.386241,8.1519451],[-10.38652,8.1524711],[-10.386906,8.1527951],[-10.38743,8.1529801],[-10.387954,8.1530091],[-10.389478,8.1526781],[-10.389709,8.1527701],[-10.390049,8.1530951],[-10.390297,8.1535271],[-10.390915,8.1542691],[-10.391071,8.1545941],[-10.391119,8.1551361],[-10.391059,8.1556941],[-10.390906,8.1558341],[-10.390614,8.1560051],[-10.390244,8.1559441],[-10.38995,8.1557131],[-10.389795,8.1555121],[-10.389472,8.1554831],[-10.389349,8.1555761],[-10.389489,8.1559321],[-10.389428,8.1561801],[-10.389121,8.1564131],[-10.387922,8.1569911],[-10.387599,8.1572711],[-10.387432,8.1578441],[-10.387403,8.1584801],[-10.387251,8.1590381],[-10.387176,8.1595651],[-10.387239,8.1599831],[-10.387548,8.1604161],[-10.387611,8.1607411],[-10.38752,8.1610831],[-10.38729,8.1613621],[-10.386952,8.1615961],[-10.386707,8.1619991],[-10.386616,8.1623411],[-10.386294,8.1627601],[-10.385325,8.1631971],[-10.384787,8.1635551],[-10.384295,8.1637121],[-10.383771,8.1636521],[-10.381967,8.1631001],[-10.381752,8.1631781],[-10.381414,8.1635981],[-10.381216,8.1640321],[-10.381,8.1641411],[-10.380107,8.1642371],[-10.379276,8.1644111],[-10.378938,8.1646911],[-10.378693,8.1651571],[-10.377709,8.1655471],[-10.37717,8.1656731],[-10.376847,8.1655191],[-10.376106,8.1649951],[-10.375952,8.1649491],[-10.375781,8.1646241],[-10.37558,8.1643611],[-10.375333,8.1643471],[-10.374411,8.1647991],[-10.373796,8.1653431],[-10.373412,8.1654071],[-10.373057,8.1653931],[-10.372749,8.1652231],[-10.371837,8.1641261],[-10.371405,8.1638951],[-10.371157,8.1636331],[-10.371047,8.1631531],[-10.371031,8.1628121],[-10.371123,8.1626881],[-10.371354,8.1627021],[-10.371987,8.1631191],[-10.372218,8.1631641],[-10.372356,8.1630711],[-10.372464,8.1628381],[-10.372463,8.1624971],[-10.372092,8.1621571],[-10.371628,8.1618181],[-10.371272,8.1611381],[-10.371009,8.1609061],[-10.370654,8.1608141],[-10.370177,8.1608931],[-10.36953,8.1608961],[-10.368528,8.1604651],[-10.36785,8.1603591],[-10.36708,8.1604391],[-10.365725,8.1603821],[-10.365508,8.1600571],[-10.36603,8.1596531],[-10.366507,8.1594651],[-10.366566,8.1587521],[-10.366534,8.1584581],[-10.36624,8.1578851],[-10.366086,8.1578091],[-10.365116,8.1579051],[-10.364868,8.1577351],[-10.364667,8.1574411],[-10.364466,8.1572721],[-10.363819,8.1571971],[-10.363094,8.1569201],[-10.362493,8.1565661],[-10.361628,8.1559181],[-10.361242,8.1555161],[-10.3609872,8.1551108],[-10.3601569,8.1546434],[-10.359862,8.1546124],[-10.359708,8.1543808],[-10.3596064,8.1542558],[-10.3598582,8.1538458],[-10.3597942,8.1537375],[-10.3596803,8.1537284],[-10.3597018,8.1535912],[-10.3598712,8.1534022],[-10.3599151,8.1533115],[-10.359833,8.1532281],[-10.3595688,8.1533661],[-10.3594731,8.1536068],[-10.3594448,8.1537749],[-10.3591882,8.1541592],[-10.3590371,8.1545363],[-10.3588677,8.1544927],[-10.358697,8.1543781],[-10.358496,8.1541771],[-10.358418,8.1538371],[-10.3585615,8.1538122],[-10.3587659,8.1537623],[-10.358884,8.1535913],[-10.3588546,8.153402],[-10.358754,8.1532931],[-10.3586478,8.1532166],[-10.3585407,8.1531908],[-10.3581796,8.1531682],[-10.357952,8.1529711],[-10.357704,8.1524761],[-10.35738,8.1522601],[-10.357118,8.1522921],[-10.3567778,8.1526063],[-10.3565349,8.1526541],[-10.3563046,8.1525829],[-10.356056,8.1523891],[-10.355824,8.1521571],[-10.35553,8.1517241],[-10.355235,8.1510741],[-10.354926,8.1506411],[-10.354478,8.1502871],[-10.353954,8.1500561],[-10.352922,8.1500281],[-10.352522,8.1502311],[-10.352276,8.1504331],[-10.351963,8.1504861],[-10.351673,8.1501633],[-10.35183,8.1511231],[-10.351497,8.1517071],[-10.350898,8.1521601],[-10.350186,8.1521521],[-10.349769,8.1525111],[-10.349356,8.1535261],[-10.348777,8.1539681],[-10.34646,8.1547951],[-10.345558,8.1558111],[-10.344972,8.1565791],[-10.344545,8.1574221],[-10.34421,8.1577101],[-10.343431,8.1581301],[-10.343254,8.1596741],[-10.343113,8.1603631],[-10.342444,8.1613071],[-10.341672,8.1615241],[-10.341062,8.1617721],[-10.339652,8.1629641],[-10.339153,8.1629561],[-10.338323,8.1634381],[-10.33677,8.1646201],[-10.336433,8.1658801],[-10.336122,8.1660901],[-10.336134,8.1662341],[-10.335979,8.1663391],[-10.335853,8.1663161],[-10.33556,8.1664841],[-10.335077,8.1665961],[-10.334883,8.1671301],[-10.334947,8.1674071],[-10.334715,8.1684121],[-10.333195,8.1680381],[-10.333023,8.1684151],[-10.333318,8.1688591],[-10.333582,8.1688781],[-10.333655,8.1689581],[-10.333578,8.1690491],[-10.333596,8.1692461],[-10.333849,8.1693501],[-10.333737,8.1694791],[-10.333518,8.1695971],[-10.333461,8.1698251],[-10.333176,8.1700421],[-10.332662,8.1702511],[-10.332296,8.1706811],[-10.332474,8.1711531],[-10.332508,8.1723661],[-10.332274,8.1728401],[-10.332098,8.1730181],[-10.33132,8.1732131],[-10.330841,8.1739861],[-10.330703,8.1751941],[-10.330367,8.1755541],[-10.329209,8.1761211],[-10.328786,8.1765851],[-10.328391,8.1767891],[-10.328383,8.1772701],[-10.328232,8.1776601],[-10.327223,8.1785911],[-10.327158,8.1794241],[-10.326986,8.1797111],[-10.326887,8.1802951],[-10.327377,8.1808361],[-10.32743,8.1813891],[-10.327269,8.1819331],[-10.326934,8.1823431],[-10.326315,8.1827031],[-10.325382,8.1837111],[-10.325506,8.1843871],[-10.32514,8.1846541],[-10.32414,8.1846021],[-10.323432,8.1849461],[-10.322014,8.1860361],[-10.321435,8.1866621],[-10.320545,8.1882311],[-10.319927,8.1890011],[-10.319664,8.1896171],[-10.319444,8.1906511],[-10.319348,8.1925151],[-10.317865,8.1934201],[-10.318904,8.1948931],[-10.317875,8.1950891],[-10.314481,8.1954541],[-10.31222,8.1964821],[-10.311552,8.1969031],[-10.309688,8.1975401],[-10.309041,8.1975431],[-10.308558,8.1980471],[-10.308308,8.1982401],[-10.30772,8.1980711],[-10.30727,8.1977431],[-10.306284,8.1973061],[-10.305876,8.1972551],[-10.305008,8.1975361],[-10.304157,8.1975661],[-10.303127,8.1974581],[-10.302366,8.1972611],[-10.301803,8.1969771],[-10.301604,8.1969711],[-10.301531,8.1970151],[-10.301583,8.1972521],[-10.301694,8.1974361],[-10.302445,8.1980471],[-10.302579,8.1982761],[-10.301856,8.1983371],[-10.301004,8.1990771],[-10.3007,8.1995701],[-10.300671,8.2001731],[-10.300877,8.2006441],[-10.300906,8.2014451],[-10.300397,8.2023471],[-10.300294,8.2031871],[-10.300887,8.2038811],[-10.300767,8.2045161],[-10.300374,8.2056781],[-10.300083,8.2061401],[-10.29982,8.2064511],[-10.299857,8.2068871],[-10.299447,8.2072801],[-10.299313,8.2082821],[-10.299539,8.2088131],[-10.29949,8.2091811],[-10.29933,8.2095671],[-10.299183,8.2096561],[-10.298646,8.2096641],[-10.298332,8.2099761],[-10.298238,8.2106271],[-10.299335,8.2116601],[-10.299404,8.2120001],[-10.299324,8.2124371],[-10.299186,8.2128961],[-10.297845,8.2140091],[-10.29735,8.2145941],[-10.297311,8.2152191],[-10.297383,8.2154751],[-10.298074,8.2160001],[-10.298047,8.2161891],[-10.297641,8.2167431],[-10.296536,8.2180671],[-10.295979,8.2188781],[-10.295585,8.2195961],[-10.295325,8.2203401],[-10.295307,8.2209131],[-10.296156,8.2220981],[-10.296088,8.2225451],[-10.295062,8.2232731],[-10.294916,8.2235401],[-10.294938,8.2238061],[-10.29505,8.2241011],[-10.295226,8.2242641],[-10.295616,8.2242081],[-10.295847,8.2243921],[-10.295877,8.2272971],[-10.296051,8.2276141],[-10.297254,8.2282241],[-10.297979,8.2288571],[-10.298449,8.2294291],[-10.298953,8.2305191],[-10.299075,8.2309731],[-10.299698,8.2314831],[-10.300787,8.2317241],[-10.301279,8.2326141],[-10.301691,8.2341991],[-10.301712,8.2348421],[-10.301624,8.2352341],[-10.301457,8.2356931],[-10.301451,8.2360781],[-10.301627,8.2363921],[-10.302627,8.2370851],[-10.30256,8.2377161],[-10.302376,8.2381731],[-10.301122,8.2390281],[-10.300741,8.2394061],[-10.300713,8.2398131],[-10.30081,8.2402931],[-10.301055,8.2409651],[-10.301373,8.2413431],[-10.30216,8.2416361],[-10.302888,8.2417811],[-10.304918,8.2418711],[-10.305895,8.2417791],[-10.306567,8.2415851],[-10.306994,8.2412661],[-10.307563,8.2412401],[-10.308235,8.2411091],[-10.308932,8.2424991],[-10.309137,8.2431941],[-10.308587,8.2435671],[-10.308259,8.2441371],[-10.307995,8.2444261],[-10.307254,8.2448501],[-10.307292,8.2452201],[-10.307748,8.2454841],[-10.308228,8.2459671],[-10.308289,8.2467431],[-10.308815,8.2471881],[-10.309101,8.2476581],[-10.309122,8.2483151],[-10.308912,8.2488251],[-10.309333,8.2498371],[-10.309741,8.2501751],[-10.309034,8.2518701],[-10.308558,8.2536491],[-10.308875,8.2537961],[-10.307628,8.2546051],[-10.307537,8.2549431],[-10.309328,8.2545721],[-10.310172,8.2545961],[-10.310734,8.2550071],[-10.311336,8.2555711],[-10.311125,8.2563811],[-10.311534,8.2569091],[-10.312096,8.2573291],[-10.311494,8.2573311],[-10.310257,8.2616001],[-10.310667,8.2632811],[-10.311028,8.2640441],[-10.311224,8.2648221],[-10.312007,8.2649661],[-10.312995,8.2650041],[-10.313811,8.2651721],[-10.313727,8.2658931],[-10.313824,8.2661891],[-10.314326,8.2668971],[-10.314439,8.2676811],[-10.315125,8.2683361],[-10.315033,8.2688631],[-10.314996,8.2694231],[-10.315027,8.2699631],[-10.315116,8.2702441],[-10.315865,8.2717031],[-10.315603,8.2721291],[-10.315493,8.2725391],[-10.316253,8.2748851],[-10.315567,8.2765231],[-10.315395,8.2772221],[-10.315796,8.2780991],[-10.316733,8.2785771],[-10.317537,8.2798891],[-10.317443,8.2800811],[-10.31712,8.2803641],[-10.317173,8.2806151],[-10.317454,8.2812431],[-10.318458,8.2826881],[-10.318959,8.2832931],[-10.319877,8.2840271],[-10.320053,8.2845281],[-10.320212,8.2847571],[-10.318866,8.2860981],[-10.318314,8.2867601],[-10.315796,8.2886111],[-10.31471,8.2896791],[-10.313485,8.2902151],[-10.311503,8.2909821],[-10.310888,8.2913201],[-10.30962,8.2917411],[-10.309482,8.2925421],[-10.30905,8.2935021],[-10.307003,8.2938611],[-10.306657,8.2938511],[-10.305926,8.2944171],[-10.305672,8.2947551],[-10.304952,8.2953371],[-10.303976,8.2958531],[-10.302574,8.2967141],[-10.301131,8.2974691],[-10.301743,8.2980911],[-10.301607,8.2985451],[-10.301594,8.2989951],[-10.302186,8.2999851],[-10.302354,8.3003841],[-10.303286,8.3030371],[-10.303473,8.3041361],[-10.303311,8.3044231],[-10.302972,8.3048481],[-10.301046,8.3058121],[-10.299907,8.3067901],[-10.29924,8.3075511],[-10.298803,8.3076951],[-10.298296,8.3083931],[-10.298719,8.3102901],[-10.298517,8.3108231],[-10.298052,8.3113011],[-10.297927,8.3120131],[-10.298298,8.3127931],[-10.298674,8.3133881],[-10.298182,8.3141321],[-10.297252,8.3160501],[-10.297245,8.3168081],[-10.29742,8.3175031],[-10.297777,8.3176761],[-10.296996,8.3187621],[-10.298125,8.3216551],[-10.297698,8.3217851],[-10.296772,8.3218091],[-10.296233,8.3219901],[-10.295445,8.3229291],[-10.295169,8.3234651],[-10.294813,8.3236201],[-10.294341,8.3241511],[-10.294457,8.3244291],[-10.294728,8.3246941],[-10.29519,8.3249771],[-10.296085,8.3259521],[-10.296514,8.3268651],[-10.296521,8.3272131],[-10.296391,8.3275911],[-10.295902,8.3281271],[-10.29534,8.3288671],[-10.294545,8.3288091],[-10.294703,8.3303231],[-10.29499,8.3308141],[-10.295207,8.3317141],[-10.295019,8.3327281],[-10.294714,8.3335891],[-10.293016,8.3344751],[-10.290821,8.3351801],[-10.290923,8.3361371],[-10.29066,8.3367571],[-10.290466,8.3374521],[-10.290317,8.3376441],[-10.290186,8.3380491],[-10.289939,8.3382641],[-10.289716,8.3386991],[-10.289463,8.3389901],[-10.289298,8.3392561],[-10.288711,8.3395591],[-10.288465,8.3400181],[-10.28842,8.3404351],[-10.288548,8.3406431],[-10.289494,8.3413351],[-10.289754,8.3416611],[-10.289864,8.3419961],[-10.28983,8.3422851],[-10.289929,8.3425691],[-10.290586,8.3426591],[-10.290973,8.3429361],[-10.291378,8.3431451],[-10.291744,8.3431331],[-10.292408,8.3434241],[-10.293279,8.3442201],[-10.293553,8.3445801],[-10.293135,8.3449341],[-10.29326,8.3458561],[-10.293108,8.3461431],[-10.29251,8.3466671],[-10.292074,8.3473541],[-10.291728,8.3475621],[-10.291811,8.3479201],[-10.292094,8.3484471],[-10.291936,8.3487081],[-10.291391,8.3488351],[-10.290178,8.3498611],[-10.290148,8.3501471],[-10.290466,8.3505861],[-10.290416,8.3508851],[-10.28998,8.3514301],[-10.291249,8.3535901],[-10.291514,8.3537111],[-10.291943,8.3540181],[-10.292563,8.3547531],[-10.293461,8.3553291],[-10.294422,8.3557131],[-10.295004,8.3561471],[-10.295313,8.3571391],[-10.29483,8.3576871],[-10.29467,8.3579881],[-10.294665,8.3581561],[-10.294758,8.3583811],[-10.295452,8.3594391],[-10.295378,8.3596241],[-10.295217,8.3597871],[-10.295004,8.3598511],[-10.294406,8.3598821],[-10.294348,8.3599231],[-10.294127,8.3605161],[-10.294179,8.3608521],[-10.294088,8.3610371],[-10.294147,8.3614001],[-10.294318,8.3619311],[-10.294227,8.3623831],[-10.293973,8.3628551],[-10.294038,8.3636511],[-10.293057,8.3644041],[-10.293093,8.3648141],[-10.292959,8.3652241],[-10.292314,8.3651521],[-10.291894,8.3652001],[-10.291636,8.3655771],[-10.291406,8.3655491],[-10.291176,8.3656011],[-10.29105,8.3660301],[-10.291305,8.3664341],[-10.291283,8.3666141],[-10.291133,8.3667301],[-10.290745,8.3667311],[-10.290459,8.3671501],[-10.290654,8.3677641],[-10.290574,8.3680711],[-10.290137,8.3682671],[-10.289853,8.3686981],[-10.289154,8.3693751],[-10.288911,8.3694861],[-10.288994,8.3700301],[-10.288787,8.3702971],[-10.288304,8.3702291],[-10.288061,8.3699861],[-10.287923,8.3700441],[-10.287815,8.3709241],[-10.287531,8.3715931],[-10.286204,8.3726601],[-10.2866,8.3740591],[-10.286879,8.3748231],[-10.287215,8.3753591],[-10.287536,8.3756331],[-10.288026,8.3758831],[-10.288009,8.3761551],[-10.28778,8.3763411],[-10.287458,8.3765161],[-10.287234,8.3767131],[-10.287437,8.3771641],[-10.287983,8.3770471],[-10.28822,8.3773301],[-10.288216,8.3775731],[-10.288447,8.3778911],[-10.288512,8.3785211],[-10.288437,8.3786491],[-10.288335,8.3787641],[-10.288225,8.3787481],[-10.287821,8.3785121],[-10.28756,8.3784551],[-10.287423,8.3784901],[-10.28739,8.3786701],[-10.287467,8.3791321],[-10.287582,8.3792941],[-10.28809,8.3794891],[-10.288348,8.3793781],[-10.288884,8.3795101],[-10.289514,8.3801221],[-10.289606,8.3803421],[-10.289785,8.3804741],[-10.289958,8.3805151],[-10.290371,8.3802241],[-10.29028,8.3808291],[-10.288522,8.3846731],[-10.287995,8.3847571],[-10.287507,8.3849011],[-10.286915,8.3852211],[-10.287473,8.3876351],[-10.286021,8.3887451],[-10.28638,8.3897971],[-10.286312,8.3903831],[-10.285559,8.3906801],[-10.285512,8.3913941],[-10.285197,8.3915791],[-10.28354,8.3913641],[-10.280875,8.3925481],[-10.278826,8.3950731],[-10.278807,8.3955541],[-10.279282,8.3970501],[-10.279405,8.3976201],[-10.279091,8.3982971],[-10.279318,8.3989941],[-10.280371,8.3995941],[-10.280724,8.3999921],[-10.280886,8.4004201],[-10.281051,8.4016231],[-10.281088,8.4024631],[-10.27994,8.4026761],[-10.278819,8.4021571],[-10.278669,8.4038391],[-10.278699,8.4052411],[-10.279119,8.4058831],[-10.27961,8.4061941],[-10.279927,8.4062861],[-10.280169,8.4064241],[-10.280262,8.4065681],[-10.280443,8.4067051],[-10.277769,8.4084271],[-10.276662,8.4089911],[-10.27774,8.4110071],[-10.277823,8.4114931],[-10.27772,8.4116781],[-10.277547,8.4118411],[-10.276978,8.4119291],[-10.27676,8.4122891],[-10.276369,8.4124641],[-10.276151,8.4126101],[-10.275944,8.4128721],[-10.275887,8.4130741],[-10.275866,8.4134281],[-10.275918,8.4136591],[-10.276103,8.4139771],[-10.276243,8.4143351],[-10.27629,8.4147291],[-10.27628,8.4151281],[-10.27635,8.4153711],[-10.276633,8.4157171],[-10.276676,8.4162881],[-10.275324,8.4170911],[-10.275543,8.4178641],[-10.275625,8.4187691],[-10.27386,8.4210371],[-10.273792,8.4220091],[-10.274324,8.4226121],[-10.275163,8.4229731],[-10.276051,8.4230371],[-10.276276,8.4232971],[-10.276295,8.4236611],[-10.276204,8.4242001],[-10.276465,8.4246041],[-10.277666,8.4257001],[-10.278154,8.4256991],[-10.278245,8.4255311],[-10.278395,8.4254201],[-10.279403,8.4255391],[-10.280296,8.4259751],[-10.28073,8.4263451],[-10.28118,8.4269401],[-10.281113,8.4273161],[-10.281097,8.4280281],[-10.280966,8.4283521],[-10.280691,8.4285611],[-10.280311,8.4287481],[-10.280348,8.4294391],[-10.280315,8.4296471],[-10.279717,8.4299851],[-10.279741,8.4302511],[-10.279822,8.4304941],[-10.280019,8.4308641],[-10.279928,8.4312461],[-10.279517,8.4321851],[-10.279253,8.4324301],[-10.279001,8.4328011],[-10.27861,8.4329181],[-10.278197,8.4328161],[-10.277442,8.4327261],[-10.277148,8.4328081],[-10.27712,8.4329821],[-10.277352,8.4334501],[-10.277353,8.4337281],[-10.277158,8.4340411],[-10.276492,8.4344841],[-10.276338,8.4347851],[-10.27635,8.4349931],[-10.276663,8.4357861],[-10.276624,8.4359891],[-10.275961,8.4368861],[-10.27502,8.4379431],[-10.274493,8.4384881],[-10.274148,8.4387331],[-10.273803,8.4389071],[-10.273368,8.4395341],[-10.273035,8.4397671],[-10.272805,8.4401951],[-10.272705,8.4411451],[-10.27227,8.4420381],[-10.271814,8.4435211],[-10.271683,8.4446051],[-10.271735,8.4458731],[-10.272029,8.4466031],[-10.273903,8.4486751],[-10.274821,8.4499181],[-10.275663,8.4521301],[-10.275765,8.4533111],[-10.275686,8.4538381],[-10.275715,8.4541201],[-10.276058,8.4549061],[-10.276094,8.4553351],[-10.276332,8.4559181],[-10.276339,8.4563871],[-10.27626,8.4569201],[-10.276333,8.4579951],[-10.276689,8.4594411],[-10.276743,8.4600961],[-10.276824,8.4602811],[-10.277615,8.4607241],[-10.277939,8.4612611],[-10.278597,8.4617861],[-10.279128,8.4620221],[-10.279438,8.4620091],[-10.279767,8.4619151],[-10.280147,8.4619201],[-10.280475,8.4620001],[-10.280591,8.4622021],[-10.280805,8.4624041],[-10.280857,8.4625601],[-10.281082,8.4627461],[-10.281135,8.4629431],[-10.281332,8.4633121],[-10.281817,8.4638431],[-10.281922,8.4641441],[-10.282199,8.4644031],[-10.282235,8.4647441],[-10.281942,8.4646641],[-10.281585,8.4647341],[-10.280653,8.4651431],[-10.278996,8.4655421],[-10.278803,8.4663531],[-10.278577,8.4668511],[-10.278319,8.4671881],[-10.27755,8.4679721],[-10.276953,8.4684201],[-10.277025,8.4694221],[-10.277015,8.4698331],[-10.276844,8.4705511],[-10.277034,8.4713251],[-10.275666,8.4720471],[-10.274611,8.4725211],[-10.274796,8.4727581],[-10.275068,8.4732931],[-10.275053,8.4736521],[-10.274927,8.4742891],[-10.274901,8.4748401],[-10.27522,8.4755341],[-10.275515,8.4758571],[-10.275632,8.4764951],[-10.275695,8.4773851],[-10.275604,8.4777551],[-10.275594,8.4781721],[-10.275412,8.4789371],[-10.275403,8.4795161],[-10.275877,8.4802321],[-10.276294,8.4807631],[-10.276491,8.4812831],[-10.27727,8.4825571],[-10.277602,8.4837071],[-10.277916,8.4845571],[-10.278066,8.4845861],[-10.278739,8.4845081],[-10.279246,8.4846491],[-10.2799137,8.4849993],[-10.2772935,8.4866117],[-10.2765267,8.4879659],[-10.2771304,8.4909376],[-10.2737238,8.4915999],[-10.2704716,8.4919826],[-10.2678079,8.4910312],[-10.2660392,8.4907975],[-10.2650636,8.4873623],[-10.2636351,8.486651],[-10.258405,8.4871019],[-10.2547763,8.4897464],[-10.2451315,8.4923909],[-10.2393064,8.4917298],[-10.238065,8.4866296],[-10.2353912,8.4863463],[-10.2317798,8.4907583],[-10.2269352,8.4938789],[-10.22455,8.491122],[-10.225069,8.4845614],[-10.2258092,8.4841263],[-10.2262813,8.483983],[-10.2268285,8.4839353],[-10.22825,8.4840945],[-10.228985,8.484121],[-10.2292813,8.4839885],[-10.2295214,8.4837231],[-10.229559,8.4834525],[-10.2293497,8.4829007],[-10.2286525,8.4819436],[-10.2265603,8.4806486],[-10.2228154,8.4804679],[-10.2186097,8.4802132],[-10.2157773,8.4813168],[-10.2131165,8.4825053],[-10.2119149,8.4814866],[-10.2098951,8.4792577],[-10.2074891,8.4790124],[-10.2050168,8.4823913],[-10.2029748,8.4825696],[-10.2011002,8.4843729],[-10.2019,8.4875537],[-10.2014096,8.4891288],[-10.2012139,8.4897719],[-10.2002419,8.4923526],[-10.1984395,8.4950691],[-10.1952637,8.4962575],[-10.1942645,8.4980056],[-10.1931156,8.4986579],[-10.1919986,8.4998573],[-10.1903498,8.5013617],[-10.1884031,8.5022635],[-10.1867134,8.5035639],[-10.1854903,8.5046886],[-10.1825205,8.5071661],[-10.1807376,8.5080729],[-10.1802336,8.5080654],[-10.1795739,8.5076531],[-10.1791484,8.5075584],[-10.1780102,8.5078845],[-10.1759007,8.5095922],[-10.1731275,8.512482],[-10.1714893,8.5131974],[-10.1693618,8.5134468],[-10.1684044,8.5138496],[-10.1673693,8.5145214],[-10.1668866,8.5147443],[-10.1663726,8.514846],[-10.1625963,8.5150775],[-10.1613304,8.5156982],[-10.1600434,8.516866],[-10.1589004,8.5183459],[-10.1585706,8.5193243],[-10.1585652,8.520129],[-10.1588525,8.5206182],[-10.159363,8.5209811],[-10.1601167,8.5211743],[-10.1605244,8.5211849],[-10.1610012,8.5212681],[-10.1629905,8.5228326],[-10.1633895,8.5234413],[-10.1633953,8.5235175],[-10.1634855,8.5238906],[-10.163448,8.5243424],[-10.1630437,8.5252154],[-10.162713,8.5256519],[-10.1622513,8.5260361],[-10.1616187,8.526437],[-10.160879,8.5267357],[-10.1600094,8.5270843],[-10.1586769,8.5274615],[-10.157475,8.5272827],[-10.1558633,8.5268197],[-10.154168,8.5258506],[-10.1530158,8.525567],[-10.1527406,8.5250771],[-10.1525599,8.5247553],[-10.1518501,8.5242678],[-10.1508792,8.5240625],[-10.149993,8.5244927],[-10.1494982,8.5247525],[-10.1480676,8.5242476],[-10.1459347,8.5242634],[-10.1441209,8.523974],[-10.1398552,8.5225117],[-10.1377703,8.5222329],[-10.1362758,8.5222751],[-10.1339727,8.5228748],[-10.1326078,8.5234236],[-10.1320393,8.5234661],[-10.1308054,8.5232963],[-10.1283241,8.5225801],[-10.1273668,8.5227275],[-10.1265529,8.5230167],[-10.1262126,8.5235638],[-10.1260633,8.5253478],[-10.1261536,8.526789],[-10.1255261,8.5274308],[-10.1245474,8.52782],[-10.1230577,8.5291887],[-10.1218466,8.5298878],[-10.1208613,8.5318741],[-10.1202143,8.534537],[-10.1198609,8.5349537],[-10.119626,8.5350843],[-10.1192891,8.5350057],[-10.1186198,8.5346933],[-10.1181991,8.5342461],[-10.1178299,8.5336816],[-10.1177472,8.5329378],[-10.1178675,8.532112],[-10.1178073,8.5314202],[-10.1159118,8.5295159],[-10.1143688,8.5285378],[-10.1137037,8.5282089],[-10.1130171,8.5280604],[-10.1117403,8.5279437],[-10.1109679,8.5277527],[-10.1104422,8.5274662],[-10.1102478,8.5272025],[-10.1094128,8.5252907],[-10.1094249,8.5246966],[-10.1094355,8.524175],[-10.1092834,8.52336],[-10.1089186,8.5226809],[-10.1082847,8.5218615],[-10.1073819,8.5209464],[-10.1048981,8.519552],[-10.103493,8.5188394],[-10.1023606,8.5177195],[-10.1013723,8.5171422],[-10.1006374,8.5158206],[-10.102016,8.5147493],[-10.1016221,8.5129964],[-10.1001803,8.5132732],[-10.0978782,8.5140695],[-10.0972898,8.5145239],[-10.0963516,8.5148558],[-10.0958652,8.5148863],[-10.0953924,8.5145022],[-10.0947442,8.5144752],[-10.0943705,8.5148993],[-10.0941369,8.5156284],[-10.0936113,8.5164009],[-10.0927654,8.5169656],[-10.0902242,8.5178664],[-10.0850852,8.519007],[-10.0832603,8.5195629],[-10.0826617,8.5195845],[-10.0821924,8.5194962],[-10.0813376,8.5188881],[-10.079035,8.5170043],[-10.0790678,8.5159756],[-10.0784328,8.5159506],[-10.0762371,8.5169546],[-10.0753908,8.5174059],[-10.074924,8.5181962],[-10.0742449,8.5177734],[-10.0732505,8.516887],[-10.0731087,8.5134445],[-10.0726809,8.5115507],[-10.0719132,8.5093033],[-10.071246,8.5090391],[-10.0704222,8.5091843],[-10.0682884,8.5106114],[-10.0671089,8.5110975],[-10.065914,8.5113567],[-10.0634571,8.5113465],[-10.0620634,8.5107367],[-10.0600561,8.5088039],[-10.0579449,8.5060646],[-10.0561031,8.5047278],[-10.0550699,8.5037567],[-10.054228,8.5031979],[-10.0532478,8.5031569],[-10.0518955,8.5027223],[-10.0501689,8.5017301],[-10.0484139,8.500903],[-10.0472671,8.5000369],[-10.0466589,8.4994558],[-10.045973,8.4986958],[-10.0456669,8.4977789],[-10.0455319,8.496687],[-10.0450519,8.4957104],[-10.0427544,8.4891385],[-10.0430244,8.4885973],[-10.0454585,8.485025],[-10.0459699,8.4831608],[-10.0466195,8.4817133],[-10.0470233,8.4805897],[-10.046886,8.4798758],[-10.0468239,8.478208],[-10.0471198,8.4771576],[-10.0482328,8.4760925],[-10.0495139,8.4752803],[-10.0500922,8.4746325],[-10.0512155,8.4721131],[-10.0521819,8.4705006],[-10.0529374,8.4696631],[-10.0538316,8.4687534],[-10.0541601,8.4681686],[-10.0543081,8.4675156],[-10.0548304,8.4664383],[-10.0555129,8.466034],[-10.0560933,8.465608],[-10.056305,8.4648371],[-10.0560823,8.4643155],[-10.0554017,8.463765],[-10.0544778,8.4634127],[-10.054581,8.4622487],[-10.0548778,8.4609365],[-10.0548856,8.4593411],[-10.0553677,8.4578536],[-10.0559655,8.4560587],[-10.0563816,8.4549612],[-10.0568664,8.4537487],[-10.0570214,8.4519759],[-10.0587576,8.4496687],[-10.0593015,8.4488239],[-10.0594723,8.4480578],[-10.0592577,8.4458671],[-10.0588927,8.4442677],[-10.0588779,8.4394791],[-10.0586482,8.4378233],[-10.0586136,8.4351022],[-10.0576736,8.432953],[-10.0573606,8.4318186],[-10.0580094,8.4296711],[-10.0585292,8.4287006],[-10.0585095,8.4279242],[-10.0580094,8.4274579],[-10.0571379,8.4272804],[-10.0560641,8.4275337],[-10.0552647,8.4270247],[-10.0520352,8.4270749],[-10.0510309,8.4274037],[-10.0505747,8.4273857],[-10.0499171,8.4275092],[-10.0481052,8.4280403],[-10.0474431,8.4281475],[-10.0470708,8.4281619],[-10.0457058,8.4283569],[-10.0456072,8.4281367],[-10.0454248,8.4280067],[-10.0445544,8.4279567],[-10.0429794,8.4281619],[-10.0415377,8.4282341],[-10.0404208,8.4282378],[-10.0394645,8.4283894],[-10.0380389,8.4286928],[-10.0373403,8.4295014],[-10.0364688,8.429984],[-10.0358183,8.4309925],[-10.0352344,8.4331299],[-10.0344959,8.433958],[-10.0329861,8.4345812],[-10.0315736,8.4348701],[-10.0292679,8.4354678],[-10.0271307,8.4342537],[-10.0259054,8.4337147],[-10.0253068,8.4330577],[-10.0249117,8.4327946],[-10.0235596,8.4330668],[-10.0210584,8.4346209],[-10.0181239,8.4362023],[-10.0161526,8.437682],[-10.0145601,8.4385363],[-10.0130388,8.4407311],[-10.0103754,8.4412326],[-10.0091678,8.4415075],[-10.0072711,8.4418366],[-10.0060197,8.4419456],[-10.0052358,8.4416486],[-10.004393,8.4413564],[-10.0016705,8.4422156],[-10.000712,8.4426798],[-10.0000116,8.4432238],[-9.9995865,8.443485],[-9.999091,8.4435759],[-9.9984397,8.443793],[-9.9979442,8.4441291],[-9.9973284,8.4446192],[-9.9963444,8.4449763],[-9.994596,8.4451444],[-9.9913043,8.4454104],[-9.9907593,8.4455436],[-9.9904903,8.4455856],[-9.9901788,8.4456065],[-9.9896764,8.4455705],[-9.988671,8.4450743],[-9.9884658,8.4451024],[-9.9879534,8.4454797],[-9.9879351,8.4459231],[-9.9879641,8.4463073],[-9.9885932,8.4470629],[-9.9887206,8.4478747],[-9.9882746,8.4496536],[-9.9880502,8.4502988],[-9.9876729,8.451117],[-9.987313,8.451782],[-9.9870628,8.4523142],[-9.986596,8.4527715],[-9.9859078,8.4531103],[-9.984609,8.4540301],[-9.9842695,8.4544658],[-9.9841149,8.4551205],[-9.983493,8.4556109],[-9.982981,8.4558447],[-9.9818968,8.4561727],[-9.9813643,8.4562059],[-9.980821,8.4564958],[-9.9801966,8.456824],[-9.9798129,8.4571611],[-9.979472,8.4576975],[-9.9787768,8.4583905],[-9.9783385,8.4588767],[-9.977741,8.4593957],[-9.9768434,8.4602611],[-9.9763245,8.4606564],[-9.9753601,8.4614077],[-9.9747722,8.46186],[-9.9738106,8.4626446],[-9.973632,8.4628943],[-9.9735199,8.4630246],[-9.9731283,8.4632537],[-9.9722054,8.4628501],[-9.9713953,8.4622626],[-9.970448,8.4620101],[-9.9697606,8.4618979],[-9.9687707,8.4621802],[-9.9675228,8.4627447],[-9.9664016,8.4633982],[-9.9655077,8.4639816],[-9.9646897,8.4648934],[-9.9641191,8.4661509],[-9.9637187,8.4672995],[-9.9635185,8.4677352],[-9.9633182,8.4681808],[-9.9632249,8.4686258],[-9.9632081,8.4687056],[-9.9628778,8.4696067],[-9.9625692,8.4701886],[-9.9620147,8.4710363],[-9.961305,8.4720041],[-9.9604531,8.4725774],[-9.9597049,8.4729944],[-9.9588791,8.4734698],[-9.9581685,8.4740176],[-9.9576589,8.4742609],[-9.9572729,8.4745967],[-9.9568458,8.475212],[-9.9564332,8.4753799],[-9.9560555,8.4753879],[-9.9556475,8.4752754],[-9.9552624,8.4754238],[-9.9547031,8.4757244],[-9.9537527,8.4766386],[-9.9528534,8.4775359],[-9.9521214,8.4780459],[-9.9511304,8.4786621],[-9.950012,8.4792222],[-9.9494386,8.4795442],[-9.9489077,8.4798313],[-9.9485679,8.4801323],[-9.9478954,8.4806364],[-9.9471663,8.4812596],[-9.9464513,8.4817357],[-9.9458992,8.4820787],[-9.9455028,8.4824498],[-9.9448586,8.4828699],[-9.9444834,8.4831079],[-9.9437826,8.483654],[-9.9429827,8.4842981],[-9.9423103,8.4847952],[-9.9422182,8.4851523],[-9.9420308,8.4854184],[-9.9419563,8.4856144],[-9.9418383,8.4859444],[-9.9415572,8.4862032],[-9.9411195,8.4865713],[-9.9397538,8.4865521],[-9.9387848,8.4862915],[-9.9379304,8.4860357],[-9.9374247,8.4859209],[-9.9371393,8.4860731],[-9.9369406,8.4858579],[-9.9368236,8.4854144],[-9.936589,8.4849891],[-9.9364394,8.484558],[-9.936187,8.4846036],[-9.9356967,8.4847712],[-9.9352365,8.4847859],[-9.9348161,8.4850807],[-9.9345961,8.4860151],[-9.9348458,8.4873613],[-9.9350632,8.4880651],[-9.9350681,8.4884429],[-9.9350512,8.4890364],[-9.9349973,8.4892296],[-9.9345734,8.4896236],[-9.9342003,8.4900639],[-9.933449,8.4904457],[-9.932992,8.4906822],[-9.9325794,8.4906782],[-9.9318302,8.4907518],[-9.9311583,8.490513],[-9.9304059,8.4907555],[-9.9298951,8.4911478],[-9.9292686,8.491634],[-9.9286603,8.4921698],[-9.9280315,8.4924877],[-9.9274425,8.4926762],[-9.9268289,8.4927906],[-9.926422,8.4929676],[-9.9259604,8.4933163],[-9.9254758,8.4938671],[-9.9252277,8.4945917],[-9.9248386,8.4953517],[-9.9242351,8.4957473],[-9.9233757,8.4959349],[-9.922473,8.4959797],[-9.9218976,8.4959555],[-9.9209275,8.4959171],[-9.9200641,8.4957305],[-9.9188844,8.4957373],[-9.918268,8.4960051],[-9.9177298,8.4964016],[-9.9169817,8.49715],[-9.9164954,8.4977927],[-9.9161816,8.4982486],[-9.9157843,8.498683],[-9.9152219,8.4988738],[-9.9144691,8.4991841],[-9.9135658,8.499477],[-9.9117897,8.4998514],[-9.9100124,8.500307],[-9.9081706,8.5004273],[-9.906943,8.5005963],[-9.9058738,8.5004411],[-9.9052296,8.5003467],[-9.9046066,8.5002907],[-9.9037784,8.5001787],[-9.9024611,8.5000155],[-9.9019506,8.4997371],[-9.9014353,8.4993736],[-9.9009115,8.4992266],[-9.9004868,8.4991355],[-9.8990853,8.4992407],[-9.897627,8.4992896],[-9.896105,8.4991635],[-9.8954396,8.4989255],[-9.894845,8.4985194],[-9.8940805,8.4982674],[-9.8930895,8.4980154],[-9.8918011,8.4977283],[-9.891072,8.4975953],[-9.8906898,8.4977563],[-9.8904137,8.4980504],[-9.8901191,8.4983105],[-9.8897129,8.4980224],[-9.8896138,8.4969932],[-9.8896209,8.4959851],[-9.8895147,8.495481],[-9.8894247,8.4951056],[-9.8891537,8.4948719],[-9.8888635,8.4947249],[-9.88846,8.4945498],[-9.8882193,8.4942628],[-9.887837,8.4938987],[-9.8875317,8.4938994],[-9.8871236,8.4941234],[-9.8866529,8.4940226],[-9.8863278,8.4937958],[-9.8858346,8.4939077],[-9.8852956,8.4941323],[-9.884961,8.4948402],[-9.8848327,8.4952213],[-9.8845985,8.4954393],[-9.8841279,8.4956806],[-9.8838058,8.4961719],[-9.8833932,8.4968973],[-9.8832453,8.4973382],[-9.8831793,8.4978645],[-9.8826199,8.4982922],[-9.879071,8.4982982],[-9.876118,8.4977654],[-9.8753785,8.497882],[-9.874813,8.497984],[-9.8742481,8.4982803],[-9.8731353,8.4984752],[-9.8724382,8.4987413],[-9.8707054,8.4985864],[-9.8699792,8.498357],[-9.8695948,8.4983664],[-9.8691028,8.4984631],[-9.8687934,8.4986071],[-9.868215,8.4988208],[-9.8678096,8.498751],[-9.8671889,8.4984243],[-9.8666973,8.4981389],[-9.8661928,8.4978599],[-9.8655841,8.4977757],[-9.8647664,8.4978941],[-9.8636577,8.4979047],[-9.8630494,8.4980084],[-9.8622836,8.4982708],[-9.861783,8.4987312],[-9.8615177,8.4992015],[-9.8613125,8.4995134],[-9.8611323,8.4997461],[-9.8611373,8.5001173],[-9.860887,8.5004441],[-9.8595856,8.5003401],[-9.8589449,8.5002065],[-9.858109,8.5001025],[-9.8570979,8.5001124],[-9.856217,8.5002609],[-9.8555913,8.5003698],[-9.8551747,8.5005834],[-9.8546903,8.5007461],[-9.854315,8.5008303],[-9.8539295,8.500553],[-9.8536091,8.5002659],[-9.8531987,8.4997659],[-9.852558,8.4989738],[-9.8517349,8.4980564],[-9.8493477,8.4961847],[-9.8489065,8.4956764],[-9.8485862,8.495243],[-9.8481345,8.4948191],[-9.8474123,8.4936294],[-9.8470257,8.4929549],[-9.846862,8.4922912],[-9.8466883,8.491167],[-9.8468562,8.4906395],[-9.8469333,8.4902252],[-9.846775,8.4899551],[-9.8464614,8.489781],[-9.846137,8.4896245],[-9.8451474,8.4893607],[-9.8444553,8.4893963],[-9.8438789,8.4891157],[-9.8435983,8.4887253],[-9.8429569,8.4874091],[-9.8428683,8.4868284],[-9.8428591,8.4862805],[-9.8429851,8.4857563],[-9.8432399,8.4854156],[-9.8435092,8.4851857],[-9.8440319,8.4849529],[-9.8450343,8.4844751],[-9.8458304,8.4841652],[-9.8459516,8.4838265],[-9.8458219,8.4835298],[-9.8456024,8.4833851],[-9.8451934,8.4832692],[-9.8447051,8.483165],[-9.8441676,8.4831366],[-9.8433995,8.4833949],[-9.8423562,8.4837675],[-9.8416727,8.4840805],[-9.8409356,8.4846905],[-9.8403804,8.4851009],[-9.840016,8.4857292],[-9.8396769,8.486554],[-9.8393053,8.4873665],[-9.8387544,8.4883021],[-9.8384469,8.4887445],[-9.8382463,8.4892782],[-9.8381329,8.4899607],[-9.8379006,8.4916698],[-9.8377901,8.4923712],[-9.837661,8.4930639],[-9.8374082,8.4937333],[-9.8371794,8.4939855],[-9.8356391,8.4937979],[-9.8355323,8.4937848],[-9.8350848,8.4937191],[-9.8343505,8.493689],[-9.8338407,8.4937905],[-9.8330376,8.493776],[-9.8320102,8.494114],[-9.8314544,8.494453],[-9.8309864,8.4945645],[-9.8305695,8.4949239],[-9.8304923,8.4951529],[-9.8305882,8.4955841],[-9.8308606,8.4961359],[-9.8309385,8.4966331],[-9.831084,8.4971114],[-9.8312431,8.4974088],[-9.8312894,8.4977092],[-9.831409,8.498295],[-9.8315511,8.4986664],[-9.8317922,8.4991284],[-9.8321007,8.499702],[-9.8323799,8.5001002],[-9.8324834,8.5002933],[-9.8324819,8.5006896],[-9.8316357,8.5015444],[-9.828052,8.5025369],[-9.8264713,8.5020792],[-9.8257474,8.5021064],[-9.824074,8.5012847],[-9.8234406,8.5009947],[-9.8227182,8.5010257],[-9.8217009,8.5014195],[-9.8211838,8.5017569],[-9.8199432,8.5026356],[-9.8193439,8.5028249],[-9.8186132,8.5029929],[-9.8157771,8.5025813],[-9.8147219,8.5025417],[-9.8129503,8.5027134],[-9.8120872,8.5027478],[-9.8078292,8.5020191],[-9.8068925,8.5015345],[-9.8059871,8.5013873],[-9.805105,8.5017853],[-9.8040205,8.5026705],[-9.8031243,8.5034476],[-9.8022496,8.5038865],[-9.799951,8.5041926],[-9.7994523,8.5043879],[-9.7985448,8.5052563],[-9.7955106,8.5066995],[-9.7920588,8.5070529],[-9.7913637,8.5073494],[-9.7907157,8.5076917],[-9.7904517,8.508156],[-9.7904508,8.5087359],[-9.7909991,8.5111048],[-9.7906252,8.5127791],[-9.7903367,8.513837],[-9.7900047,8.5146697],[-9.7895608,8.5156462],[-9.7897699,8.5160694],[-9.7900415,8.5162838],[-9.7905315,8.5164868],[-9.7915535,8.5167331],[-9.7923965,8.5167038],[-9.7932115,8.5170221],[-9.7944812,8.5178636],[-9.7949718,8.5183274],[-9.7955101,8.5186583],[-9.7964833,8.5188484],[-9.7966824,8.5191521],[-9.7968531,8.5199937],[-9.7966633,8.5214654],[-9.7963967,8.5218309],[-9.7963521,8.5230118],[-9.7965225,8.5240727],[-9.7963867,8.5251328],[-9.7965036,8.5256953],[-9.7967065,8.5258012],[-9.7976124,8.5260328],[-9.7987889,8.5259864],[-9.7996414,8.526254],[-9.7999201,8.5258137],[-9.800084,8.5251509],[-9.8004623,8.5246042],[-9.8008074,8.5243649],[-9.8011354,8.5247194],[-9.8012182,8.5254083],[-9.8009392,8.5264079],[-9.80043,8.5271434],[-9.7993656,8.5287555],[-9.7985785,8.5294632],[-9.7979697,8.5314459],[-9.7977379,8.5320634],[-9.7972127,8.532644],[-9.7968041,8.5329248],[-9.7957049,8.533739],[-9.7955002,8.5344649],[-9.7956777,8.5350557],[-9.7955032,8.5353989],[-9.7950762,8.5357859],[-9.7942107,8.5356294],[-9.7930271,8.5354287],[-9.7916586,8.5350197],[-9.7896181,8.5343178],[-9.7876722,8.533384],[-9.787445,8.5331927],[-9.7871005,8.5328974],[-9.7869384,8.5327872],[-9.7865657,8.5329132],[-9.7861252,8.5332058],[-9.7855289,8.53437],[-9.7849007,8.5354502],[-9.7838437,8.5367004],[-9.7835588,8.5374551],[-9.7833625,8.5381694],[-9.7827125,8.5398054],[-9.7822413,8.5403606],[-9.7814217,8.5408858],[-9.7798394,8.542139],[-9.7788954,8.5443495],[-9.7781082,8.5465585],[-9.7773958,8.5476336],[-9.7764382,8.5487852],[-9.7756153,8.549988],[-9.7749463,8.550312],[-9.7739728,8.5506303],[-9.7722632,8.5513149],[-9.7711018,8.5512984],[-9.7706584,8.5512755],[-9.7703856,8.5515047],[-9.7695232,8.5519106],[-9.7690602,8.5518656],[-9.768582,8.551925],[-9.7681821,8.551721],[-9.7674646,8.5516444],[-9.7673872,8.551476],[-9.7667936,8.5514351],[-9.7668452,8.5512514],[-9.7665362,8.551203],[-9.7665358,8.5509262],[-9.7663633,8.5509785],[-9.7660975,8.551072],[-9.7658486,8.5509411],[-9.7656266,8.5511759],[-9.7654408,8.5509513],[-9.7655389,8.5508441],[-9.765193,8.5506859],[-9.7647491,8.5505481],[-9.7645973,8.5504358],[-9.7647372,8.5502036],[-9.7645392,8.5502476],[-9.7642082,8.5501146],[-9.7637452,8.5497836],[-9.7634362,8.5497386],[-9.7628182,8.5497586],[-9.7625092,8.5496696],[-9.7622408,8.5492779],[-9.7618009,8.5490338],[-9.7613879,8.5489808],[-9.7609158,8.5488747],[-9.7605251,8.5489645],[-9.7599848,8.5487737],[-9.7597243,8.5485733],[-9.7593964,8.5483444],[-9.7588463,8.5480962],[-9.7585407,8.5478804],[-9.7582762,8.5478259],[-9.7580015,8.5477379],[-9.7577372,8.5476637],[-9.7575439,8.5475942],[-9.7572308,8.5475133],[-9.7566872,8.5472566],[-9.7563562,8.5471676],[-9.7554292,8.5473416],[-9.7550542,8.5473396],[-9.7547892,8.5471636],[-9.7546352,8.5468766],[-9.7543932,8.5467006],[-9.7538862,8.5465016],[-9.7533792,8.5461036],[-9.7530482,8.5457946],[-9.7525202,8.5451336],[-9.7520132,8.5448906],[-9.7515942,8.5447796],[-9.7511082,8.5447556],[-9.7502042,8.5445996],[-9.7497352,8.5446476],[-9.7482292,8.5423056],[-9.7471632,8.5407736],[-9.7461112,8.5395936],[-9.7428772,8.5362516],[-9.7422962,8.5357756],[-9.7398602,8.5351076],[-9.7364592,8.5340686],[-9.7310862,8.5317536],[-9.7288402,8.5300496],[-9.7283372,8.5295126],[-9.7281712,8.5289926],[-9.7276222,8.5283336],[-9.7268422,8.5278726],[-9.7264322,8.5272446],[-9.7262792,8.5269346],[-9.7258202,8.5265756],[-9.7250892,8.5258576],[-9.7249202,8.5255506],[-9.7248872,8.5252536],[-9.7250532,8.5230776],[-9.7250742,8.5209616],[-9.7253612,8.5184206],[-9.7256402,8.5174446],[-9.7256682,8.5170966],[-9.7258072,8.5167056],[-9.7258992,8.5154656],[-9.7260042,8.5151086],[-9.7262382,8.5145656],[-9.7268382,8.5141266],[-9.7273372,8.5135936],[-9.7277752,8.5132726],[-9.7283842,8.5129096],[-9.7291892,8.5125826],[-9.7294292,8.5124046],[-9.7301772,8.5116946],[-9.7303912,8.5115596],[-9.7307672,8.5115186],[-9.7313812,8.5117766],[-9.7319502,8.5123916],[-9.7321792,8.5127926],[-9.7324762,8.5131256],[-9.7343242,8.5128446],[-9.7346322,8.5127186],[-9.7354292,8.5122386],[-9.7362002,8.5119446],[-9.7368082,8.5118196],[-9.7380382,8.5118936],[-9.7395252,8.5118926],[-9.7399022,8.5118006],[-9.7402612,8.5116326],[-9.7408792,8.5111506],[-9.7420022,8.5105356],[-9.7426132,8.5097566],[-9.7428622,8.5096466],[-9.7435802,8.5095906],[-9.7432652,8.5093346],[-9.7432802,8.5083056],[-9.7433422,8.5079066],[-9.7435402,8.5075416],[-9.7437922,8.5069146],[-9.7438882,8.5065146],[-9.7439162,8.5060306],[-9.7438582,8.5057326],[-9.7435712,8.5050346],[-9.7435582,8.5043966],[-9.7436702,8.5041336],[-9.7438512,8.5038716],[-9.7438452,8.5035486],[-9.7435832,8.5029346],[-9.7431862,8.5021936],[-9.7427452,8.5015026],[-9.7423392,8.5007526],[-9.7416892,8.4993556],[-9.7414212,8.4982666],[-9.7414432,8.4974416],[-9.7415502,8.4966346],[-9.7415022,8.4960476],[-9.7413942,8.4955716],[-9.7412252,8.4951796],[-9.7407512,8.4944126],[-9.7406072,8.4940376],[-9.7404512,8.4929406],[-9.7398872,8.4914246],[-9.7394992,8.4905646],[-9.7392702,8.4902226],[-9.7389642,8.4899156],[-9.7386422,8.4894806],[-9.7386122,8.4886386],[-9.7382822,8.4881356],[-9.7382382,8.4868346],[-9.7380952,8.4864266],[-9.7376622,8.4857866],[-9.7369902,8.4852986],[-9.7368122,8.4850516],[-9.7366772,8.4847446],[-9.7366532,8.4844806],[-9.7367172,8.4836736],[-9.7368592,8.4828416],[-9.7368702,8.4822716],[-9.7367972,8.4817016],[-9.7364352,8.4807396],[-9.7359032,8.4795726],[-9.7357032,8.4786366],[-9.7355852,8.4782876],[-9.7354162,8.4779296],[-9.7347982,8.4769746],[-9.7347312,8.4767616],[-9.7344132,8.4740486],[-9.7345123,8.4731566],[-9.7343503,8.4729436],[-9.7341423,8.4720666],[-9.7337443,8.4714186],[-9.7333013,8.4710256],[-9.7325523,8.4706396],[-9.7321093,8.4702886],[-9.7317773,8.4701176],[-9.7315313,8.4698696],[-9.7312003,8.4694346],[-9.7311089,8.4692586],[-9.7306163,8.4683096],[-9.7303023,8.4680106],[-9.7292203,8.4674276],[-9.7282223,8.4670656],[-9.7272873,8.4662876],[-9.7270323,8.4659376],[-9.7268813,8.4655456],[-9.7268673,8.4649336],[-9.7267933,8.4643976],[-9.7266413,8.4640406],[-9.7262513,8.4635796],[-9.7253103,8.4636936],[-9.7246673,8.4640816],[-9.7232403,8.4656046],[-9.7229153,8.4657226],[-9.7223853,8.4657536],[-9.7220353,8.4655826],[-9.7218493,8.4652586],[-9.7217483,8.4649096],[-9.7213403,8.4645416],[-9.7211383,8.4641076],[-9.7206613,8.4637906],[-9.7203903,8.4633126],[-9.7195223,8.4627136],[-9.7192253,8.4623046],[-9.7188203,8.4614526],[-9.7187793,8.4610946],[-9.7182603,8.4606506],[-9.7181093,8.4602336],[-9.7176243,8.4597886],[-9.7173863,8.4597196],[-9.7170463,8.4593016],[-9.7168503,8.4591986],[-9.7166133,8.4587556],[-9.7164123,8.4580996],[-9.7154233,8.4562246],[-9.7153233,8.4557486],[-9.7153683,8.4552646],[-9.7152843,8.4536406],[-9.7153023,8.4533516],[-9.7155173,8.4531396],[-9.7160663,8.4528536],[-9.7162553,8.4525736],[-9.7163883,8.4517926],[-9.7169043,8.4512506],[-9.7170673,8.4509966],[-9.7171463,8.4506566],[-9.7169313,8.4494066],[-9.7166713,8.4485636],[-9.7166393,8.4482066],[-9.7166923,8.4478576],[-9.7169523,8.4471876],[-9.7174973,8.4460936],[-9.7175243,8.4457536],[-9.7174833,8.4454136],[-9.7172643,8.4449616],[-9.7172993,8.4433636],[-9.7177463,8.4412406],[-9.7177573,8.4408586],[-9.7178433,8.4406806],[-9.7179483,8.4402476],[-9.7177238,8.4392776],[-9.7172123,8.4389776],[-9.7167863,8.4388566],[-9.7162733,8.4387946],[-9.7154613,8.4388756],[-9.7148713,8.4389996],[-9.7141783,8.4390816],[-9.7134443,8.4390266],[-9.7130553,8.4391915],[-9.7123366,8.4392828],[-9.7119939,8.4396975],[-9.711954,8.4405565],[-9.7117816,8.4406287],[-9.7118841,8.4412313],[-9.7116863,8.4416796],[-9.7110631,8.4416449],[-9.7107356,8.4413588],[-9.7102038,8.4415915],[-9.7098274,8.4420104],[-9.7097333,8.4423735],[-9.7099544,8.4426574],[-9.7104674,8.4424247],[-9.7107612,8.4423986],[-9.7109431,8.4425964],[-9.7109673,8.4432668],[-9.7105533,8.4440116],[-9.70987,8.4441332],[-9.7094791,8.4440771],[-9.7090698,8.4440911],[-9.7090792,8.4444914],[-9.7091827,8.4449662],[-9.7097783,8.4449856],[-9.7093833,8.4453576],[-9.7091933,8.4457556],[-9.7089693,8.4460186],[-9.7087636,8.4469605],[-9.7085709,8.4474239],[-9.7083404,8.4478195],[-9.7082227,8.4480243],[-9.7082269,8.4482868],[-9.7080768,8.4484293],[-9.7078274,8.44842],[-9.7076157,8.448285],[-9.7075357,8.4484107],[-9.7076392,8.4485037],[-9.7076251,8.4486248],[-9.7075169,8.4487365],[-9.7074463,8.4486434],[-9.7073992,8.4484712],[-9.7071013,8.448536],[-9.7069139,8.4487825],[-9.7068204,8.4489227],[-9.7068769,8.4491275],[-9.7071263,8.4491973],[-9.7070709,8.4494964],[-9.7068251,8.4495836],[-9.7067075,8.4497465],[-9.7065663,8.4500212],[-9.7063404,8.449942],[-9.7061946,8.4499979],[-9.7061851,8.4501515],[-9.7063075,8.4502446],[-9.7065587,8.4506836],[-9.7063545,8.4508311],[-9.7060957,8.4507706],[-9.7059263,8.4508823],[-9.7058416,8.4510173],[-9.7057381,8.4507659],[-9.7056863,8.4506076],[-9.7055263,8.4505704],[-9.7053946,8.4506868],[-9.7052816,8.4508962],[-9.7050652,8.4507706],[-9.7050416,8.4503191],[-9.7047118,8.450333],[-9.7043358,8.4508776],[-9.7039812,8.4509807],[-9.7036403,8.4510913],[-9.7035586,8.4515852],[-9.70299,8.4514176],[-9.7027438,8.4519995],[-9.7025664,8.4519063],[-9.7024115,8.451947],[-9.7023942,8.4528618],[-9.7027311,8.4531863],[-9.7024676,8.4539357],[-9.7022041,8.4538426],[-9.7020723,8.4540148],[-9.70131,8.4536518],[-9.7011971,8.45408],[-9.7008585,8.4543627],[-9.7005459,8.4543933],[-9.70036,8.4552816],[-9.6999278,8.4553709],[-9.6995407,8.4552111],[-9.6992593,8.4557216],[-9.6988883,8.4561786],[-9.6986053,8.4564236],[-9.6984153,8.4568306],[-9.6983623,8.4571626],[-9.6984523,8.4578766],[-9.6987713,8.4587196],[-9.6989673,8.4589756],[-9.6994943,8.4593606],[-9.7003053,8.4609626],[-9.7009443,8.4613236],[-9.7012083,8.4615626],[-9.7013183,8.4617586],[-9.7014353,8.4621666],[-9.7014263,8.4637486],[-9.7016273,8.4644716],[-9.7016143,8.4652536],[-9.7015073,8.4660186],[-9.7013253,8.4664166],[-9.7010583,8.4668916],[-9.7001203,8.4679926],[-9.6998863,8.4686456],[-9.6999243,8.4694706],[-9.6999993,8.4697596],[-9.7004743,8.4704416],[-9.7006083,8.4707746],[-9.7007423,8.4713106],[-9.7007323,8.4716246],[-9.7006613,8.4720326],[-9.6993852,8.4740236],[-9.6995532,8.4760396],[-9.6993272,8.4766926],[-9.6992332,8.4781546],[-9.6990202,8.4795396],[-9.6990442,8.4799306],[-9.6991702,8.4802286],[-9.6991692,8.4804916],[-9.6990212,8.4809506],[-9.6987882,8.4813996],[-9.6982272,8.4822636],[-9.6979502,8.4828916],[-9.6979532,8.4838866],[-9.6979002,8.4841586],[-9.6977372,8.4843356],[-9.6972132,8.4847156],[-9.6968452,8.4848246],[-9.6961362,8.4848716],[-9.6953932,8.4847406],[-9.6947012,8.4847546],[-9.6932362,8.4852746],[-9.6892272,8.4870826],[-9.6869042,8.4882446],[-9.6853862,8.4892826],[-9.6819262,8.4919766],[-9.6812212,8.4927046],[-9.6787192,8.4939166],[-9.6771592,8.4947416],[-9.6683402,8.4990086],[-9.6681092,8.4990666],[-9.6675962,8.5006026],[-9.6671302,8.5013486],[-9.6664192,8.5016506],[-9.6658722,8.5017676],[-9.6644532,8.5018286],[-9.6636242,8.5017216],[-9.6632652,8.5017206],[-9.6630132,8.5011066],[-9.6625522,8.4979766],[-9.6624942,8.4977126],[-9.6623842,8.4974906],[-9.6621972,8.4972606],[-9.6616432,8.4969856],[-9.6608862,8.4963866],[-9.6606152,8.4960376],[-9.6602582,8.4957466],[-9.6594112,8.4957846],[-9.6585302,8.4959416],[-9.6582322,8.4958126],[-9.6577222,8.4953426],[-9.6571742,8.4939966],[-9.6569732,8.4933836],[-9.6568122,8.4930856],[-9.6564982,8.4927186],[-9.6558762,8.4922906],[-9.6555882,8.4919996],[-9.6550682,8.4916576],[-9.6532392,8.4916566],[-9.6525802,8.4918486],[-9.6521612,8.4918726],[-9.6517682,8.4919636],[-9.6509702,8.4924276],[-9.6501662,8.4926786],[-9.6499182,8.4926516],[-9.6494662,8.4924366],[-9.6488452,8.4919666],[-9.6480082,8.4919196],[-9.6476412,8.4917306],[-9.6470722,8.4911926],[-9.6469122,8.4908686],[-9.647397,8.4900396],[-9.647545,8.4895726],[-9.648832,8.4871816],[-9.648972,8.4866636],[-9.649222,8.4861976],[-9.649302,8.4857556],[-9.649297,8.4851266],[-9.6493591,8.4846596],[-9.649464,8.4843366],[-9.649758,8.4837346],[-9.65018,8.4831336],[-9.650602,8.4826166],[-9.651005,8.4823296],[-9.651117,8.4821776],[-9.651179,8.4818296],[-9.651526,8.4809556],[-9.651622,8.4805566],[-9.651813,8.4801406],[-9.651944,8.4796656],[-9.652194,8.4791476],[-9.652591,8.4785886],[-9.652908,8.4783606],[-9.653132,8.4781416],[-9.653287,8.4779126],[-9.653383,8.4774966],[-9.653412,8.4770116],[-9.653659,8.4756866],[-9.653695,8.4752966],[-9.653868,8.4750246],[-9.654289,8.4746366],[-9.654461,8.4744156],[-9.6544721,8.4739736],[-9.654146,8.4741506],[-9.653642,8.4741396],[-9.653395,8.4740456],[-9.6529871,8.4736516],[-9.6527911,8.4735996],[-9.6520381,8.4737746],[-9.6513381,8.4736356],[-9.6509191,8.4736586],[-9.6499691,8.4739006],[-9.649437,8.4742206],[-9.649068,8.4745246],[-9.648495,8.4746496],[-9.647898,8.4743496],[-9.647617,8.4742626],[-9.6471981,8.4743376],[-9.647045,8.4741406],[-9.646831,8.4741826],[-9.646626,8.4741046],[-9.6464651,8.4739596],[-9.6462341,8.4739326],[-9.6459451,8.4737696],[-9.6455521,8.4737766],[-9.6451401,8.4739356],[-9.6445931,8.4740016],[-9.644224,8.4742376],[-9.64383,8.4743796],[-9.642351,8.4744656],[-9.641727,8.4745736],[-9.641223,8.4745796],[-9.64052,8.4749756],[-9.640229,8.4750416],[-9.639947,8.4750236],[-9.639657,8.4749026],[-9.639085,8.4748316],[-9.638599,8.4745576],[-9.637735,8.4747316],[-9.637163,8.4746356],[-9.636158,8.4741886],[-9.6355271,8.4739556],[-9.6342891,8.4736606],[-9.6338021,8.4735986],[-9.6328281,8.4736866],[-9.6316921,8.4735286],[-9.6310351,8.4733636],[-9.6298911,8.4732126],[-9.6296531,8.4729316],[-9.6294501,8.4725816],[-9.6294461,8.4719186],[-9.6300271,8.4703576],[-9.6301501,8.4697716],[-9.6302051,8.4692616],[-9.6302171,8.4685226],[-9.6303561,8.4682846],[-9.6302911,8.4676126],[-9.6298591,8.4670076],[-9.6297411,8.4667096],[-9.6291821,8.4659416],[-9.6282391,8.4648826],[-9.6263191,8.4644906],[-9.6256711,8.4641806],[-9.6230721,8.4615916],[-9.6225461,8.4608416],[-9.6218641,8.4591546],[-9.6217051,8.4585416],[-9.6219391,8.4579396],[-9.6220271,8.4575576],[-9.6220291,8.4572086],[-9.6219711,8.4569876],[-9.6217841,8.4568416],[-9.6209381,8.4567616],[-9.6205301,8.4564186],[-9.6204121,8.4561976],[-9.6203541,8.4558736],[-9.6203591,8.4550326],[-9.6202581,8.4546836],[-9.6200211,8.4542486],[-9.6199911,8.4535596],[-9.6200811,8.4528296],[-9.6202531,8.4527456],[-9.6205971,8.4523646],[-9.6209511,8.4516266],[-9.6211231,8.4514576],[-9.6214391,8.4514506],[-9.6221651,8.4515396],[-9.6228581,8.4513816],[-9.6235111,8.4507556],[-9.6246041,8.4495026],[-9.6255731,8.4488446],[-9.6258141,8.4485826],[-9.6262801,8.4478286],[-9.6266241,8.4474476],[-9.6270471,8.4467616],[-9.6271771,8.4464726],[-9.6273521,8.4456656],[-9.6280511,8.4445896],[-9.6285871,8.4435726],[-9.6288711,8.4431576],[-9.6285691,8.4423056],[-9.6285111,8.4418466],[-9.6285601,8.4408526],[-9.6287001,8.4403686],[-9.6289831,8.4400806],[-9.6294041,8.4397596],[-9.6302911,8.4385316],[-9.6306351,8.4381596],[-9.6328521,8.4359856],[-9.6337021,8.4353186],[-9.6343971,8.4348976],[-9.6352041,8.4342976],[-9.6371271,8.4326076],[-9.6378561,8.4322456],[-9.6384561,8.4318406],[-9.6394161,8.4314626],[-9.6403931,8.4309486],[-9.6409661,8.4307476],[-9.6412671,8.4304606],[-9.6417391,8.4301826],[-9.6425881,8.4295236],[-9.6430551,8.4286166],[-9.6433571,8.4282016],[-9.6438121,8.4278206],[-9.6440101,8.4274816],[-9.6443051,8.4268116],[-9.6444771,8.4265406],[-9.6448211,8.4262196],[-9.6450611,8.4261016],[-9.6454451,8.4260946],[-9.6463241,8.4263116],[-9.6479441,8.4269826],[-9.6491461,8.4273716],[-9.6497281,8.4272976],[-9.6500451,8.4271206],[-9.6504751,8.4265626],[-9.6511481,8.4254266],[-9.6512891,8.4247636],[-9.6511731,8.4240576],[-9.6512011,8.4238026],[-9.6513991,8.4234046],[-9.6520361,8.4226516],[-9.6523371,8.4223636],[-9.6526931,8.4214046],[-9.6528931,8.4206746],[-9.6532041,8.4201066],[-9.6534101,8.4199206],[-9.6539061,8.4198556],[-9.6543091,8.4197556],[-9.6545401,8.4196456],[-9.6548671,8.4192476],[-9.6548531,8.4187806],[-9.6547281,8.4182446],[-9.6547541,8.4166976],[-9.6544951,8.4156336],[-9.6547581,8.4144106],[-9.6549931,8.4137656],[-9.6553281,8.4134356],[-9.6566571,8.4126776],[-9.6577031,8.4119596],[-9.6580131,8.4116126],[-9.6582981,8.4111296],[-9.6583601,8.4106376],[-9.6582771,8.4101946],[-9.6583401,8.4097356],[-9.6586511,8.4091596],[-9.6588691,8.4083696],[-9.6591621,8.4078956],[-9.6589131,8.4066696],[-9.6588401,8.4060826],[-9.6584841,8.4054526],[-9.6582211,8.4052126],[-9.6576501,8.4049126],[-9.6553481,8.4041956],[-9.6544421,8.4041566],[-9.6539971,8.4042996],[-9.6532111,8.4043296],[-9.6524421,8.4042996],[-9.6512661,8.4036986],[-9.6507561,8.4032886],[-9.6504421,8.4028786],[-9.6502231,8.4024696],[-9.6500721,8.4020186],[-9.6490961,8.4008746],[-9.6487651,8.4004056],[-9.6482421,8.3992296],[-9.6481431,8.3987356],[-9.6482021,8.3973586],[-9.6479601,8.3977746],[-9.6476511,8.3980536],[-9.6474791,8.3982736],[-9.6473741,8.3987316],[-9.6472181,8.3991306],[-9.6470021,8.3994276],[-9.6467531,8.3996636],[-9.6464421,8.4002486],[-9.6458831,8.4008586],[-9.6454121,8.4010256],[-9.6431291,8.4014476],[-9.6421441,8.4017576],[-9.6413821,8.4020516],[-9.6406211,8.4021916],[-9.6399951,8.4024866],[-9.6394891,8.4028066],[-9.6389411,8.4030246],[-9.6386491,8.4032696],[-9.6383401,8.4036086],[-9.6377541,8.4044136],[-9.6372751,8.4044956],[-9.6354301,8.4045206],[-9.6344711,8.4048046],[-9.6330621,8.4047126],[-9.6326251,8.4049316],[-9.6318171,8.4057516],[-9.6311211,8.4063436],[-9.6307021,8.4064346],[-9.6301981,8.4063896],[-9.6297381,8.4062256],[-9.6287901,8.4061106],[-9.6285261,8.4059566],[-9.6276561,8.4056966],[-9.6269311,8.4055656],[-9.6262391,8.4055536],[-9.6254341,8.4057706],[-9.6245951,8.4061486],[-9.6235941,8.4062546],[-9.6216201,8.4062866],[-9.6210241,8.4060626],[-9.6198641,8.4057596],[-9.6190441,8.4056866],[-9.6184111,8.4058286],[-9.6175611,8.4065376],[-9.6172521,8.4066556],[-9.6166281,8.4067286],[-9.6161751,8.4066926],[-9.6158771,8.4066566],[-9.6154341,8.4062976],[-9.6142801,8.4051096],[-9.6138881,8.4048106],[-9.6135981,8.4046986],[-9.6131631,8.4046286],[-9.6126171,8.4044636],[-9.6106701,8.4044116],[-9.6092871,8.4041576],[-9.6088081,8.4041466],[-9.6085351,8.4042396],[-9.6081401,8.4045516],[-9.6077611,8.4049326],[-9.6068831,8.4060326],[-9.6065831,8.4063376],[-9.6063421,8.4065146],[-9.6057771,8.4066646],[-9.6043821,8.4071426],[-9.6037741,8.4074276],[-9.6033461,8.4075446],[-9.6028231,8.4077546],[-9.6015591,8.4077656],[-9.6005411,8.4078956],[-9.6002071,8.4079966],[-9.6000011,8.4082076],[-9.5998021,8.4085806],[-9.5990781,8.4096906],[-9.5986831,8.4099266],[-9.5973761,8.4099366],[-9.5969571,8.4100536],[-9.5961321,8.4107556],[-9.5955331,8.4110156],[-9.5941381,8.4113826],[-9.5938211,8.4115086],[-9.5932781,8.4123476],[-9.5931141,8.4140376],[-9.5929751,8.4143006],[-9.5924671,8.4150036],[-9.5923881,8.4153686],[-9.5923941,8.4158196],[-9.5924941,8.4161516],[-9.5927061,8.4165526],[-9.5928741,8.4170036],[-9.5929651,8.4175056],[-9.5930271,8.4199626],[-9.5928441,8.4205056],[-9.5926941,8.4213036],[-9.5927781,8.4216106],[-9.5935411,8.4225576],[-9.5935821,8.4228986],[-9.5935001,8.4237986],[-9.5933441,8.4241046],[-9.5931811,8.4242986],[-9.5920671,8.4248036],[-9.5913911,8.4249016],[-9.5909121,8.4249246],[-9.5906821,8.4248636],[-9.5904521,8.4247776],[-9.5901301,8.4243346],[-9.5898261,8.4237626],[-9.5895651,8.4230986],[-9.5892421,8.4227996],[-9.5888681,8.4225336],[-9.5887071,8.4222776],[-9.5883791,8.4213156],[-9.5879971,8.4209316],[-9.5869921,8.4204076],[-9.5865161,8.4200396],[-9.5859541,8.4196966],[-9.5856221,8.4194226],[-9.5852751,8.4189786],[-9.5849451,8.4183656],[-9.5846811,8.4182956],[-9.5839821,8.4179606],[-9.5833951,8.4174646],[-9.5828581,8.4172156],[-9.5800701,8.4177196],[-9.5791721,8.4178426],[-9.5783691,8.4178126],[-9.5775851,8.4174086],[-9.5697961,8.4112396],[-9.5677481,8.4094176],[-9.5676751,8.4087206],[-9.5679371,8.4077526],[-9.5621431,8.3970106],[-9.5608641,8.3925056],[-9.5607251,8.3917476],[-9.5600071,8.3917436],[-9.5593891,8.3919686],[-9.5590291,8.3921526],[-9.5585541,8.3922786],[-9.5573191,8.3923866],[-9.5564601,8.3920246],[-9.5559591,8.3917506],[-9.5554301,8.3914056],[-9.5547591,8.3908736],[-9.5544181,8.3903436],[-9.5542481,8.3899426],[-9.5542381,8.3891716],[-9.5546031,8.3881446],[-9.5546371,8.3872456],[-9.5544541,8.3867726],[-9.5536861,8.3856116],[-9.5535451,8.3851116],[-9.5531131,8.3829096],[-9.5528731,8.3823516],[-9.5525171,8.3818356],[-9.5521171,8.3815616],[-9.5517301,8.3813736],[-9.5513581,8.3812576],[-9.5505411,8.3810966],[-9.5501835,8.3809961],[-9.5477631,8.3799966],[-9.5471331,8.3797076],[-9.5463031,8.3792456],[-9.5459601,8.3790016],[-9.5453291,8.3789836],[-9.5445301,8.3788986],[-9.5433611,8.3791586],[-9.5423541,8.3795676],[-9.5416321,8.3802206],[-9.5412281,8.3805046],[-9.5403791,8.3808566],[-9.5397771,8.3807396],[-9.5393331,8.3805376],[-9.5373191,8.3790696],[-9.5369901,8.3787826],[-9.5364311,8.3786796],[-9.5361871,8.3787206],[-9.5359701,8.3788916],[-9.5357401,8.3789326],[-9.5345361,8.3787546],[-9.5330991,8.3790046],[-9.5328401,8.3790036],[-9.5318771,8.3792546],[-9.5308551,8.3798206],[-9.5297481,8.3800866],[-9.5283981,8.3801366],[-9.5278111,8.3799186],[-9.5258311,8.3797796],[-9.5253301,8.3795486],[-9.5248441,8.3792316],[-9.5233301,8.3779526],[-9.5229721,8.3778226],[-9.5222681,8.3778466],[-9.5216501,8.3779726],[-9.5211181,8.3781976],[-9.5207291,8.3784246],[-9.5198231,8.3787336],[-9.5189581,8.3792716],[-9.5185701,8.3793696],[-9.5176511,8.3794506],[-9.5158711,8.3793986],[-9.5155841,8.3795106],[-9.5150961,8.3794656],[-9.5145081,8.3793626],[-9.5138501,8.3790016],[-9.5135221,8.3786576],[-9.5134091,8.3783566],[-9.5126951,8.3777676],[-9.5120941,8.3774496],[-9.5109481,8.3770576],[-9.5105621,8.3768556],[-9.5093471,8.3759356],[-9.5080601,8.3751716],[-9.5073741,8.3746536],[-9.5064031,8.3738196],[-9.5054291,8.3735436],[-9.5041121,8.3730216],[-9.5035391,8.3728616],[-9.5020321,8.3728106],[-9.5002941,8.3730016],[-9.4988721,8.3730226],[-9.4975211,8.3734436],[-9.4970901,8.3735126],[-9.4968461,8.3734396],[-9.4963741,8.3730946],[-9.4960611,8.3727646],[-9.4958341,8.3723486],[-9.4957791,8.3718346],[-9.4958701,8.3710636],[-9.4960901,8.3703646],[-9.4969781,8.3683136],[-9.4972131,8.3675146],[-9.4972441,8.3670866],[-9.4971891,8.3667576],[-9.4970331,8.3665136],[-9.4966611,8.3661976],[-9.4963461,8.3660676],[-9.4958021,8.3659786],[-9.4952561,8.3660476],[-9.4945381,8.3660716],[-9.4921131,8.3658726],[-9.4916691,8.3656996],[-9.4915701,8.3654766],[-9.4916412,8.3650618],[-9.4916908,8.3645278],[-9.4914806,8.3636343],[-9.4913332,8.3632747],[-9.4907523,8.3631689],[-9.4898754,8.3630133],[-9.4890745,8.3636629],[-9.4888366,8.3638453],[-9.4884515,8.3639727],[-9.4881687,8.3641053],[-9.4878555,8.3640412],[-9.487519,8.3637694],[-9.4874215,8.3634067],[-9.4877032,8.3631227],[-9.487727,8.3626644],[-9.4875993,8.3625453],[-9.4877374,8.3622657],[-9.4879241,8.3618519],[-9.4878986,8.3612344],[-9.4877775,8.360988],[-9.4876077,8.3606046],[-9.4874679,8.3602883],[-9.4871723,8.3600395],[-9.4865773,8.3598658],[-9.4837158,8.3570889],[-9.4830442,8.3563486],[-9.4827923,8.3560958],[-9.4828179,8.3555613],[-9.4824819,8.3552082],[-9.4822354,8.3551258],[-9.4819721,8.3551207],[-9.4815437,8.3552732],[-9.4810843,8.3555956],[-9.480692,8.3555599],[-9.480501,8.3548143],[-9.4801366,8.3545528],[-9.4795573,8.3538889],[-9.4793086,8.3528327],[-9.4792106,8.3517654],[-9.4789576,8.3513057],[-9.4785964,8.3511725],[-9.4777998,8.3493401],[-9.4775691,8.3485582],[-9.4784143,8.3457809],[-9.4785559,8.3442004],[-9.4792144,8.3417608],[-9.4795778,8.3404729],[-9.4798867,8.3400037],[-9.4803187,8.3395869],[-9.4806404,8.3395492],[-9.4808599,8.3397221],[-9.4807384,8.3403612],[-9.4809571,8.3408165],[-9.4812008,8.3420314],[-9.4850619,8.344456],[-9.4858641,8.3445644],[-9.4866497,8.3443872],[-9.4876658,8.3434634],[-9.4897093,8.3391786],[-9.4909691,8.3389414],[-9.4929586,8.3390432],[-9.4948641,8.3387353],[-9.4956869,8.3380732],[-9.496776,8.337113],[-9.4975658,8.3360814],[-9.500361,8.3330025],[-9.5029211,8.3314472],[-9.5036057,8.3311282],[-9.5044306,8.3303662],[-9.5059891,8.3297559],[-9.5069778,8.3296435],[-9.5079309,8.3289939],[-9.5085112,8.3283149],[-9.508712,8.3279646],[-9.5099347,8.3268776],[-9.5103107,8.3263458],[-9.5104128,8.3260108],[-9.5099858,8.3232517],[-9.510023,8.3225928],[-9.5121174,8.3218685],[-9.513278,8.321836],[-9.5146492,8.3217217],[-9.5154023,8.3215759],[-9.5160921,8.3211353],[-9.5175853,8.3198673],[-9.5185266,8.3188689],[-9.5187821,8.3183436],[-9.5191323,8.3168527],[-9.5189671,8.3164846],[-9.5185211,8.3151726],[-9.5184501,8.3141376],[-9.5182201,8.3137286],[-9.5177031,8.3133736],[-9.5164011,8.3127946],[-9.5161701,8.3126386],[-9.5158731,8.3123736],[-9.5156201,8.3120306],[-9.5153041,8.3112696],[-9.5151851,8.3108506],[-9.5147681,8.3103526],[-9.5147108,8.3103107],[-9.5144051,8.3100866],[-9.5127841,8.3091646],[-9.5121441,8.3089956],[-9.5117261,8.3085636],[-9.5114961,8.3081886],[-9.5109471,8.3074586],[-9.5104521,8.3070486],[-9.5101871,8.3069376],[-9.5083521,8.3067296],[-9.5073601,8.3062836],[-9.5070281,8.3062266],[-9.5036321,8.3062306],[-9.5032901,8.3060856],[-9.5030131,8.3058656],[-9.5022001,8.3054816],[-9.5013691,8.3053476],[-9.4999481,8.3053106],[-9.4992961,8.3054166],[-9.4984951,8.3053526],[-9.4976961,8.3049896],[-9.4967031,8.3052426],[-9.4960241,8.3049896],[-9.4957151,8.3046896],[-9.4955881,8.3042996],[-9.4956741,8.3033036],[-9.4956191,8.2992576],[-9.4954451,8.2982996],[-9.4954971,8.2979116],[-9.4956291,8.2976126],[-9.4960341,8.2969676],[-9.4962491,8.2961616],[-9.4964221,8.2957436],[-9.4972751,8.2939146],[-9.4976191,8.2933586],[-9.4994071,8.2908866],[-9.5001111,8.2903916],[-9.5004431,8.2900146],[-9.5008181,8.2894186],[-9.5013601,8.2891126],[-9.5017021,8.2888556],[-9.5020451,8.2884486],[-9.5021571,8.2882106],[-9.5021891,8.2878816],[-9.5021511,8.2875026],[-9.5020231,8.2872226],[-9.5018341,8.2869926],[-9.5013161,8.2866516],[-9.5011871,8.2864416],[-9.5011781,8.2861916],[-9.5012191,8.2860126],[-9.5014311,8.2857346],[-9.5019681,8.2848006],[-9.5023241,8.2839456],[-9.5024371,8.2833986],[-9.5023811,8.2827106],[-9.5025801,8.2814156],[-9.5023851,8.2805576],[-9.5020891,8.2798886],[-9.5016971,8.2784416],[-9.5011301,8.2778596],[-9.5006811,8.2775286],[-9.4999801,8.2775646],[-9.4977201,8.2771036],[-9.4971901,8.2770316],[-9.4967401,8.2768696],[-9.4960211,8.2765366],[-9.4955821,8.2762756],[-9.4950051,8.2757236],[-9.4947271,8.2753636],[-9.4944481,8.2751926],[-9.4940281,8.2750806],[-9.4923461,8.2750316],[-9.4915541,8.2752166],[-9.4913231,8.2752256],[-9.4911031,8.2751446],[-9.4909341,8.2749946],[-9.4905981,8.2743146],[-9.4902481,8.2726886],[-9.4897951,8.2713406],[-9.4896651,8.2681706],[-9.4894861,8.2679506],[-9.4892071,8.2677896],[-9.4890681,8.2675596],[-9.4889901,8.2673196],[-9.4889711,8.2670006],[-9.4891011,8.2655866],[-9.4893641,8.2650296],[-9.4895361,8.2648416],[-9.4898881,8.2645736],[-9.4902281,8.2645956],[-9.4909711,8.2642306],[-9.4916261,8.2636066],[-9.4924951,8.2623256],[-9.4928281,8.2619186],[-9.4932211,8.2615326],[-9.4942681,8.2606906],[-9.4958611,8.2589956],[-9.4960531,8.2587176],[-9.4966911,8.2575546],[-9.4973781,8.2565716],[-9.4976801,8.2562546],[-9.4980221,8.2560076],[-9.4986651,8.2556626],[-9.4994101,8.2550186],[-9.4998341,8.2544726],[-9.5005361,8.2542766],[-9.5008371,8.2541296],[-9.5013411,8.2535836],[-9.5018941,8.2531976],[-9.5033021,8.2523386],[-9.5036041,8.2520906],[-9.5040881,8.2515356],[-9.5042801,8.2512276],[-9.5043721,8.2509296],[-9.5043361,8.2500556],[-9.5044041,8.2495996],[-9.5046331,8.2490406],[-9.5046901,8.2486076],[-9.5050331,8.2479466],[-9.5053991,8.2474336],[-9.5056161,8.2472506],[-9.5063721,8.2469086],[-9.5071851,8.2468956],[-9.5074031,8.2468496],[-9.5079061,8.2464506],[-9.5083061,8.2458116],[-9.5091991,8.2448766],[-9.5096571,8.2446596],[-9.5104241,8.2444756],[-9.5106071,8.2443846],[-9.5108131,8.2442026],[-9.5111681,8.2434956],[-9.5113281,8.2430736],[-9.5122201,8.2417396],[-9.5122311,8.2415686],[-9.5117501,8.2417056],[-9.5112001,8.2417066],[-9.5101691,8.2415026],[-9.5085081,8.2409236],[-9.5075451,8.2404806],[-9.5067771,8.2402426],[-9.5049561,8.2398916],[-9.5044971,8.2396306],[-9.5042341,8.2396076],[-9.5039131,8.2394146],[-9.5035691,8.2394486],[-9.5034091,8.2393016],[-9.5028361,8.2392676],[-9.5025721,8.2391886],[-9.5020571,8.2392236],[-9.5017361,8.2393376],[-9.5011521,8.2394176],[-9.5008661,8.2393046],[-9.5006361,8.2391106],[-9.5004071,8.2388376],[-9.5002351,8.2385306],[-9.4999711,8.2382346],[-9.4998911,8.2379836],[-9.4998791,8.2373916],[-9.4999931,8.2367766],[-9.5001301,8.2364566],[-9.5010681,8.2355216],[-9.5016291,8.2350646],[-9.5019031,8.2347566],[-9.5030821,8.2330236],[-9.5039621,8.2312226],[-9.5043621,8.2307316],[-9.5052551,8.2299676],[-9.5053921,8.2298076],[-9.5061011,8.2284056],[-9.5063641,8.2276536],[-9.5065571,8.2267756],[-9.5066021,8.2260696],[-9.5064301,8.2256136],[-9.5061891,8.2253976],[-9.5058451,8.2249646],[-9.5054901,8.2242816],[-9.5048011,8.2232456],[-9.5045721,8.2229726],[-9.5047541,8.2221976],[-9.5052801,8.2212176],[-9.5053491,8.2210006],[-9.5054171,8.2206476],[-9.5053831,8.2204086],[-9.5052681,8.2200896],[-9.5047291,8.2194976],[-9.5044541,8.2193156],[-9.5035831,8.2191006],[-9.5033771,8.2189066],[-9.5030211,8.2182006],[-9.5029971,8.2176546],[-9.5039001,8.2154536],[-9.5056041,8.2127626],[-9.5057521,8.2124206],[-9.5056721,8.2117836],[-9.5055001,8.2115666],[-9.5052821,8.2113966],[-9.5043421,8.2112036],[-9.5038041,8.2108396],[-9.5037231,8.2105776],[-9.5037121,8.2103156],[-9.5039401,8.2093356],[-9.5043511,8.2084806],[-9.5048771,8.2077736],[-9.5059071,8.2070206],[-9.5066401,8.2067006],[-9.5070181,8.2064266],[-9.5073721,8.2060956],[-9.5075901,8.2057996],[-9.5078861,8.2043066],[-9.5079891,8.2040216],[-9.5081831,8.2038046],[-9.5083321,8.2036676],[-9.5084701,8.2036216],[-9.5094431,8.2036096],[-9.5101411,8.2031296],[-9.5105881,8.2027416],[-9.5107251,8.2027076],[-9.5115371,8.2016586],[-9.5114791,8.2006666],[-9.5116041,8.2003136],[-9.5123471,8.1989116],[-9.5131481,8.1975546],[-9.5136281,8.1969616],[-9.5144631,8.1956156],[-9.5146121,8.1956386],[-9.5147841,8.1955356],[-9.5154471,8.1947606],[-9.5158011,8.1941556],[-9.5158351,8.1937566],[-9.5156051,8.1929366],[-9.5154791,8.1919686],[-9.5154431,8.1907606],[-9.5155221,8.1898836],[-9.5154991,8.1893256],[-9.5152571,8.1886536],[-9.5147881,8.1883696],[-9.5143411,8.1881986],[-9.5139741,8.1879256],[-9.5133321,8.1872086],[-9.5130681,8.1865946],[-9.5128961,8.1863776],[-9.5125751,8.1861166],[-9.5116571,8.1849326],[-9.5095611,8.1840356],[-9.5081971,8.1837406],[-9.5077851,8.1837066],[-9.5070061,8.1837306],[-9.5065371,8.1838686],[-9.5055181,8.1844386],[-9.5036971,8.1843846],[-9.5033421,8.1844986],[-9.5028611,8.1845446],[-9.5018531,8.1848656],[-9.5015561,8.1850026],[-9.5013731,8.1851966],[-9.5006171,8.1853566],[-9.4999451,8.1855566],[-9.4987911,8.1860106],[-9.4972821,8.1862946],[-9.4964621,8.1865566],[-9.4950441,8.1869206],[-9.4947401,8.1869006],[-9.4941321,8.1864286],[-9.4939301,8.1861466],[-9.4937981,8.1856836],[-9.4936451,8.1841336],[-9.4933711,8.1830666],[-9.4933001,8.1825026],[-9.4933101,8.1819896],[-9.4934411,8.1816266],[-9.4934921,8.1811136],[-9.4934711,8.1800366],[-9.4938041,8.1788476],[-9.4939761,8.1772166],[-9.4938131,8.1756966],[-9.4934691,8.1755056],[-9.4929831,8.1754556],[-9.4921011,8.1755076],[-9.4909981,8.1760316],[-9.4894791,8.1760436],[-9.4884151,8.1758326],[-9.4867341,8.1757836],[-9.4864001,8.1759256],[-9.4861981,8.1760866],[-9.4861401,8.1762246],[-9.4861371,8.1770856],[-9.4860271,8.1774266],[-9.4858071,8.1779006],[-9.4855141,8.1782526],[-9.4850871,8.1785936],[-9.4845611,8.1788496],[-9.4822631,8.1797626],[-9.4817131,8.1800426],[-9.4803451,8.1808706],[-9.4800881,8.1809196],[-9.4797461,8.1808956],[-9.4793301,8.1807376],[-9.4782051,8.1802646],[-9.4777651,8.1800216],[-9.4774591,8.1798276],[-9.4771901,8.1795366],[-9.4770431,8.1792206],[-9.4764321,8.1785896],[-9.4761631,8.1784436],[-9.4759181,8.1784076],[-9.4750021,8.1784816],[-9.4740851,8.1787376],[-9.4737551,8.1788836],[-9.4734501,8.1791026],[-9.4731071,8.1791876],[-9.4727771,8.1793336],[-9.4713841,8.1796506],[-9.4705891,8.1797736],[-9.4689511,8.1798356],[-9.4681811,8.1799696],[-9.4675701,8.1795206],[-9.4674231,8.1793026],[-9.4673621,8.1789986],[-9.4673861,8.1776496],[-9.4671651,8.1769576],[-9.4667251,8.1764716],[-9.4659921,8.1762416],[-9.4656741,8.1761926],[-9.4655031,8.1762416],[-9.4649531,8.1765576],[-9.4645251,8.1767166],[-9.4633391,8.1770816],[-9.4629121,8.1771436],[-9.4625331,8.1770336],[-9.4622511,8.1764996],[-9.4594221,8.1616646],[-9.4594941,8.1598906],[-9.4613691,8.1412606],[-9.4613906,8.1407084],[-9.4620266,8.1407084],[-9.4624176,8.1406594],[-9.4629796,8.1404404],[-9.4633826,8.1402084],[-9.4637856,8.1397584],[-9.4640056,8.1391264],[-9.4640296,8.1376924],[-9.4637116,8.1368184],[-9.4633816,8.1363564],[-9.4626716,8.1357014],[-9.4623176,8.1355314],[-9.4612046,8.1352524],[-9.4607896,8.1352044],[-9.4602396,8.1349864],[-9.4587606,8.1348784],[-9.4583566,8.1347694],[-9.4579656,8.1345754],[-9.4568776,8.1337254],[-9.4562666,8.1336894],[-9.4548606,8.1333014],[-9.4543106,8.1332294],[-9.4534916,8.1332424],[-9.4514876,8.1342524],[-9.4508156,8.1344834],[-9.4503266,8.1342534],[-9.4493606,8.1336954],[-9.4491896,8.1335004],[-9.4490546,8.1331604],[-9.4489816,8.1328324],[-9.4490056,8.1324434],[-9.4492866,8.1313504],[-9.4495306,8.1306084],[-9.4497386,8.1300124],[-9.4499946,8.1295144],[-9.4502636,8.1291134],[-9.4504309,8.128951],[-9.4507396,8.1286514],[-9.4527196,8.1275804],[-9.4537706,8.1265584],[-9.4540696,8.1261303],[-9.4543566,8.1257194],[-9.4552846,8.1241634],[-9.4554316,8.1238234],[-9.4556516,8.1230454],[-9.455656,8.1229785],[-9.4556996,8.1223154],[-9.4559196,8.1205784],[-9.4559186,8.1201894],[-9.4556746,8.1195454],[-9.4552706,8.1189134],[-9.4549276,8.1178084],[-9.4547446,8.1174194],[-9.4541576,8.1168614],[-9.4537906,8.1165944],[-9.4529596,8.1161454],[-9.4527156,8.1159634],[-9.4528126,8.1155984],[-9.4533256,8.1151114],[-9.4536806,8.1148684],[-9.4541936,8.1145404],[-9.4545846,8.1143694],[-9.4550366,8.1141994],[-9.4556236,8.1141014],[-9.4563686,8.1135174],[-9.4566736,8.1130434],[-9.4566496,8.1124604],[-9.4565516,8.1121924],[-9.4563436,8.1109534],[-9.4560126,8.1098604],[-9.4553156,8.1085724],[-9.4551076,8.1080504],[-9.4549236,8.1073214],[-9.4545696,8.1062404],[-9.4543856,8.1050254],[-9.4541656,8.1043564],[-9.4539936,8.1040654],[-9.4535176,8.1034944],[-9.4531256,8.1031544],[-9.4519396,8.1012964],[-9.4514626,8.1006284],[-9.4511936,8.1001794],[-9.4509856,8.0997294],[-9.4505816,8.0986004],[-9.4503746,8.0982234],[-9.4500196,8.0979194],[-9.4485286,8.0970824],[-9.4480396,8.0967304],[-9.4476606,8.0963304],[-9.4472936,8.0958564],[-9.4469146,8.0953344],[-9.4467556,8.0949694],[-9.4467546,8.0940824],[-9.4470726,8.0931344],[-9.4473776,8.0926364],[-9.4478296,8.0914444],[-9.4479636,8.0908974],[-9.4479516,8.0903634],[-9.4478416,8.0899384],[-9.4476696,8.0896224],[-9.4467536,8.0889544],[-9.4464236,8.0885294],[-9.4460196,8.0878254],[-9.4459096,8.0874604],[-9.4457256,8.0870964],[-9.4451756,8.0863674],[-9.4443326,8.0857364],[-9.4436236,8.0853724],[-9.4421326,8.0847174],[-9.4416916,8.0844864],[-9.4413136,8.0842194],[-9.4410566,8.0839894],[-9.4408976,8.0835154],[-9.4408366,8.0831024],[-9.4409096,8.0821424],[-9.4413606,8.0805864],[-9.4415686,8.0801124],[-9.4418006,8.0797714],[-9.4424476,8.0790544],[-9.4428756,8.0784224],[-9.4432296,8.0775104],[-9.4438156,8.0757114],[-9.4442546,8.0745684],[-9.4444626,8.0743254],[-9.4450366,8.0733534],[-9.4452076,8.0723324],[-9.4453666,8.0718944],[-9.4454766,8.0717124],[-9.4467106,8.0710064],[-9.4472236,8.0704104],[-9.4476756,8.0695234],[-9.4476996,8.0692924],[-9.4475766,8.0684294],[-9.4475896,8.0682354],[-9.4482976,8.0674084],[-9.4492506,8.0664714],[-9.4494946,8.0661554],[-9.4499716,8.0653654],[-9.4511806,8.0640524],[-9.4516936,8.0634314],[-9.4524386,8.0621434],[-9.4525116,8.0616204],[-9.4526336,8.0612194],[-9.4533546,8.0599184],[-9.4537576,8.0594074],[-9.4546126,8.0586904],[-9.4550766,8.0581554],[-9.4555646,8.0567574],[-9.4564806,8.0553954],[-9.4572506,8.0546414],[-9.4576786,8.0544954],[-9.4587776,8.0536434],[-9.4593026,8.0531574],[-9.4603166,8.0524634],[-9.4606226,8.0521594],[-9.4610616,8.0514664],[-9.4615746,8.0502384],[-9.4616476,8.0499354],[-9.4616236,8.0489024],[-9.4618546,8.0481364],[-9.4618676,8.0477964],[-9.4617936,8.0473344],[-9.4612186,8.0463754],[-9.4612186,8.0459614],[-9.4613896,8.0455484],[-9.4613066,8.0449894],[-9.4608066,8.0443704],[-9.4601826,8.0431314],[-9.4597746,8.0427254],[-9.4593756,8.0424314],[-9.4589466,8.0422794],[-9.4582416,8.0422694],[-9.4577006,8.0424124],[-9.4572826,8.0426264],[-9.4563326,8.0433784],[-9.4559956,8.0436934],[-9.4550366,8.0458374],[-9.4548736,8.0475744],[-9.4547106,8.0479804],[-9.4539956,8.0489464],[-9.4535266,8.0494134],[-9.4530566,8.0497794],[-9.4524236,8.0501664],[-9.4517496,8.0504914],[-9.4509536,8.0509694],[-9.4505346,8.0510714],[-9.4493196,8.0517934],[-9.4488596,8.0519974],[-9.4484306,8.0520684],[-9.4479306,8.0523534],[-9.4470626,8.0526894],[-9.4462866,8.0529234],[-9.4460206,8.0530554],[-9.4454696,8.0534014],[-9.4446526,8.0541534],[-9.4436006,8.0548854],[-9.4431716,8.0550894],[-9.4426306,8.0552514],[-9.4400876,8.0556504],[-9.4391896,8.0559854],[-9.4387706,8.0562704],[-9.4382906,8.0566974],[-9.4375456,8.0576124],[-9.4370446,8.0580694],[-9.4361566,8.0585674],[-9.4356566,8.0587104],[-9.4350846,8.0588124],[-9.4333276,8.0590474],[-9.4328576,8.0592514],[-9.4312136,8.0603594],[-9.4303766,8.0605524],[-9.4300086,8.0607154],[-9.4296616,8.0609694],[-9.4290896,8.0615084],[-9.4283746,8.0619964],[-9.4279156,8.0622204],[-9.4273536,8.0623734],[-9.4267716,8.0624654],[-9.4253626,8.0630044],[-9.4245866,8.0633804],[-9.4227376,8.0644184],[-9.4221046,8.0647024],[-9.4210116,8.0649984],[-9.4201536,8.0650194],[-9.4199396,8.0648064],[-9.4191016,8.0643494],[-9.4177946,8.0638324],[-9.4173656,8.0636904],[-9.4166606,8.0635794],[-9.4157826,8.0635094],[-9.4143216,8.0630934],[-9.4136676,8.0628504],[-9.4126366,8.0622114],[-9.4117066,8.0614094],[-9.4107256,8.0609834],[-9.4100416,8.0608624],[-9.4094106,8.0609094],[-9.4103186,8.0601854],[-9.4113186,8.0590864],[-9.4114616,8.0587514],[-9.4115656,8.0582864],[-9.4115776,8.0572784],[-9.4113176,8.0565814],[-9.4111366,8.0562464],[-9.4103696,8.0553424],[-9.4100446,8.0548394],[-9.4093696,8.0539494],[-9.4085516,8.0531874],[-9.4081616,8.0529554],[-9.4077586,8.0528004],[-9.4075126,8.0525294],[-9.4072136,8.0520134],[-9.4065116,8.0511874],[-9.4061616,8.0506974],[-9.4058756,8.0501554],[-9.4057196,8.0496904],[-9.4055636,8.0484124],[-9.4055886,8.0477274],[-9.4056796,8.0471724],[-9.4059396,8.0461004],[-9.4060426,8.0454414],[-9.4061986,8.0450024],[-9.4064456,8.0438534],[-9.4064576,8.0424324],[-9.4063536,8.0418004],[-9.4063666,8.0410894],[-9.4062626,8.0407024],[-9.4062756,8.0395404],[-9.4064956,8.0379904],[-9.4068326,8.0369444],[-9.4073266,8.0359624],[-9.4077936,8.0353164],[-9.4080786,8.0345804],[-9.4081436,8.0342964],[-9.4080266,8.0341284],[-9.4081306,8.0337924],[-9.4080006,8.0335084],[-9.4079096,8.0329404],[-9.4079486,8.0324624],[-9.4081566,8.0321654],[-9.4083766,8.0319464],[-9.4084936,8.0314294],[-9.4085196,8.0306154],[-9.4087656,8.0296084],[-9.4087916,8.0291434],[-9.4087266,8.0287434],[-9.4085706,8.0284984],[-9.4082076,8.0281884],[-9.4060906,8.0265754],[-9.4056616,8.0263044],[-9.4052976,8.0261764],[-9.4053626,8.0256594],[-9.4047386,8.0210624],[-9.4047256,8.0203394],[-9.4050756,8.0199004],[-9.4053226,8.0193964],[-9.4057506,8.0187764],[-9.4060366,8.0184274],[-9.4064516,8.0180274],[-9.4068536,8.0178334],[-9.4084116,8.0167344],[-9.4100476,8.0153904],[-9.4105276,8.0150414],[-9.4111906,8.0147304],[-9.4122416,8.0140714],[-9.4129686,8.0137354],[-9.4140986,8.0137084],[-9.4146696,8.0135794],[-9.4149296,8.0133724],[-9.4151106,8.0131014],[-9.4155526,8.0121964],[-9.4158636,8.0102334],[-9.4161876,8.0095624],[-9.4168236,8.0088774],[-9.4173556,8.0081024],[-9.4180436,8.0068624],[-9.4182906,8.0063454],[-9.4184066,8.0058284],[-9.4184716,8.0050534],[-9.4187446,8.0047304],[-9.4200816,8.0035934],[-9.4207176,8.0028954],[-9.4209896,8.0026884],[-9.4217295,8.0013584],[-9.4225995,8.0001564],[-9.4257115,7.9974984],[-9.4282025,7.9972904],[-9.4298155,7.9969334],[-9.4306965,7.9964994],[-9.4318015,7.9952634],[-9.4325755,7.9942094],[-9.4333525,7.9926804],[-9.4339805,7.9916984],[-9.4347915,7.9906804],[-9.4358215,7.9898094],[-9.4375885,7.9879934],[-9.4382915,7.9866464],[-9.4389215,7.9852994],[-9.4401515,7.9812554],[-9.4404875,7.9799074],[-9.4413745,7.9784154],[-9.4422955,7.9773614],[-9.4425935,7.9764874],[-9.4425645,7.9751004],[-9.4411895,7.9719574],[-9.4413765,7.9711554],[-9.4418945,7.9701724],[-9.4421565,7.9691164],[-9.4420935,7.9672914],[-9.4416655,7.9651744],[-9.4416365,7.9636784],[-9.4421555,7.9625134],[-9.4423435,7.9615654],[-9.4421285,7.9607984],[-9.4413655,7.9596274],[-9.4384875,7.9569154],[-9.4377975,7.9559274],[-9.4377025,7.9531174],[-9.4370145,7.9516924],[-9.4364385,7.9499384],[-9.4366665,7.9484074],[-9.4378485,7.9464424],[-9.4383315,7.9450214],[-9.4408325,7.9429894],[-9.4417895,7.9420454],[-9.4424905,7.9409544],[-9.4429725,7.9398254],[-9.4436475,7.9368374],[-9.4435115,7.9349034],[-9.4431185,7.9331134],[-9.4424285,7.9320524],[-9.4398035,7.9301074],[-9.4394415,7.9292664],[-9.4394105,7.9282814],[-9.4400395,7.9269344],[-9.4409275,7.9252244],[-9.4408985,7.9238014],[-9.4407205,7.9228514],[-9.4402145,7.9216094],[-9.4394875,7.9207674],[-9.4378475,7.9193734],[-9.4377515,7.9167104],[-9.4366195,7.9162304],[-9.4352315,7.9157134],[-9.4343606,7.9143234],[-9.4350806,7.9096204],[-9.4365966,7.9069284],[-9.4369706,7.9055064],[-9.4370156,7.9039014],[-9.4367676,7.9023324],[-9.4367746,7.9009454],[-9.4378076,7.8995274],[-9.4384006,7.8982174],[-9.4386626,7.8970144],[-9.4384906,7.8951164],[-9.4383116,7.8942404],[-9.4394176,7.8928224],[-9.4397146,7.8920574],[-9.4396116,7.8908534],[-9.4383066,7.8883664],[-9.4382176,7.8845724],[-9.4372016,7.8828534],[-9.4365136,7.8814634],[-9.4364466,7.8803694],[-9.4356566,7.8775204],[-9.4351826,7.8771164],[-9.4331316,7.8773264],[-9.4319616,7.8770294],[-9.4313456,7.8760414],[-9.4312426,7.8747644],[-9.4316526,7.8733794],[-9.4322796,7.8724344],[-9.4330896,7.8715984],[-9.4331676,7.8706504],[-9.4326976,7.8695544],[-9.4324496,7.8680934],[-9.4324926,7.8668894],[-9.4329426,7.8648494],[-9.4322926,7.8633134],[-9.4321156,7.8620724],[-9.4322716,7.8603954],[-9.4321666,7.8595554],[-9.4315496,7.8584584],[-9.4300116,7.8586344],[-9.4289886,7.8583374],[-9.4288476,7.8573524],[-9.4284556,7.8553434],[-9.4282086,7.8535554],[-9.4273756,7.8519094],[-9.4267585,7.8509954],[-9.4262136,7.8502994],[-9.4237976,7.8502154],[-9.4231796,7.8494834],[-9.4222036,7.8472904],[-9.4215106,7.8468124],[-9.4194296,7.8457814],[-9.4182645,7.8446824],[-9.4172476,7.8431824],[-9.4167446,7.8414654],[-9.4166485,7.8389474],[-9.4166446,7.8329644],[-9.4164315,7.8318324],[-9.4157036,7.8310264],[-9.4132875,7.8311614],[-9.4123415,7.8299904],[-9.4110966,7.8301674],[-9.4099995,7.8300524],[-9.4091255,7.8291734],[-9.4080365,7.8275634],[-9.4069125,7.8256244],[-9.4058566,7.8245984],[-9.4049806,7.8241564],[-9.4030026,7.8243664],[-9.4023835,7.8239254],[-9.4014415,7.8221704],[-9.4008625,7.8208904],[-9.4007675,7.8181544],[-9.4011505,7.8151284],[-9.4011945,7.8136694],[-9.4008355,7.8124634],[-9.3998525,7.8115474],[-9.3986135,7.8106294],[-9.3981425,7.8096054],[-9.3978605,7.8076714],[-9.3973555,7.8063184],[-9.3958635,7.8047434],[-9.3945925,7.8030594],[-9.3936825,7.8021434],[-9.3924015,7.8020284],[-9.3915185,7.8028634],[-9.3896095,7.8040944],[-9.3886565,7.8043094],[-9.3860935,7.8044434],[-9.3855415,7.8050974],[-9.3830695,7.8086614],[-9.3817825,7.8096774],[-9.3803905,7.8100354],[-9.3791105,7.8097374],[-9.3785655,7.8090424],[-9.3785355,7.8079844],[-9.3786545,7.8061604],[-9.3781125,7.8049174],[-9.3769795,7.8047664],[-9.3758465,7.8043604],[-9.3751915,7.8037734],[-9.3754545,7.8024974],[-9.3754255,7.8010384],[-9.3751385,7.8001614],[-9.3738285,7.7986594],[-9.3706095,7.7984624],[-9.3700645,7.7977304],[-9.3695945,7.7965974],[-9.3692735,7.7952094],[-9.3695705,7.7943354],[-9.3691705,7.7939684],[-9.3684035,7.7937094],[-9.3684495,7.7919584],[-9.3679055,7.7910074],[-9.3669955,7.7901644],[-9.3666715,7.7893234],[-9.3666775,7.7881204],[-9.3670855,7.7871734],[-9.3673845,7.7860434],[-9.3673945,7.7842564],[-9.3673285,7.7829424],[-9.3674115,7.7812284],[-9.3681175,7.7792614],[-9.3682695,7.7782044],[-9.3676865,7.7778364],[-9.3663655,7.7783784],[-9.3646025,7.7795374],[-9.3631715,7.7802234],[-9.3621845,7.7801464],[-9.3614175,7.7798504],[-9.3605095,7.7785694],[-9.3602375,7.7749204],[-9.3602815,7.7735344],[-9.3606565,7.7718944],[-9.3599685,7.7706504],[-9.3593925,7.7689334],[-9.3591435,7.7676554],[-9.3592955,7.7665614],[-9.3599215,7.7659444],[-9.3608755,7.7654384],[-9.3619385,7.7651144],[-9.3617397,7.7634263],[-9.361637,7.7628076],[-9.3611,7.7606896],[-9.360077,7.7603566],[-9.35895,7.7591106],[-9.358155,7.7572466],[-9.357762,7.7556026],[-9.357402,7.7545436],[-9.356418,7.7538456],[-9.354773,7.7535456],[-9.353568,7.7529206],[-9.352878,7.7521506],[-9.3492241,7.7464729],[-9.356676,7.7353197],[-9.3547434,7.7324473],[-9.3550655,7.7309579],[-9.3562465,7.7293621],[-9.356998,7.726064],[-9.3562465,7.7236171],[-9.356998,7.7214893],[-9.362903,7.7174465],[-9.3626883,7.7142548],[-9.3641829,7.7107212],[-9.3657934,7.7093647],[-9.3670549,7.7071571],[-9.3676185,7.7033801],[-9.3687727,7.7029811],[-9.3704636,7.7012522],[-9.3716983,7.6992307],[-9.3723962,7.6982732],[-9.3736845,7.6948685],[-9.3737919,7.6927406],[-9.3747313,7.691251],[-9.3745166,7.6865962],[-9.3753486,7.6840958],[-9.3750534,7.6818614],[-9.3739798,7.6802122],[-9.3758586,7.6755306],[-9.3757781,7.6689869],[-9.3751339,7.6681623],[-9.3728793,7.6683485],[-9.3722351,7.6677899],[-9.372262,7.6667791],[-9.3735771,7.6657683],[-9.3740066,7.6645446],[-9.3746449,7.6632795],[-9.374946,7.6626826],[-9.3758586,7.6615121],[-9.3772543,7.6612727],[-9.3783011,7.6600756],[-9.3796163,7.659384],[-9.379831,7.6585594],[-9.3796968,7.6575219],[-9.3783279,7.6564047],[-9.3765296,7.6527603],[-9.3766102,7.6514568],[-9.3782207,7.6483976],[-9.3787307,7.6469079],[-9.3773348,7.6453917],[-9.3760196,7.643423],[-9.3758854,7.6409757],[-9.3762075,7.6389805],[-9.375456,7.6377568],[-9.3739261,7.6359744],[-9.3733087,7.634192],[-9.3724498,7.6341122],[-9.3714836,7.6338728],[-9.3713225,7.6326225],[-9.372101,7.6304676],[-9.3711884,7.6298824],[-9.3689874,7.6307337],[-9.3686117,7.6300154],[-9.3694706,7.6285256],[-9.369578,7.6275679],[-9.3688265,7.626557],[-9.3672697,7.626557],[-9.3647629,7.62797],[-9.3589653,7.6277571],[-9.3583211,7.625416],[-9.3599315,7.6220108],[-9.3585358,7.6197761],[-9.3589653,7.6177542],[-9.35918,7.6130719],[-9.3629377,7.6139233],[-9.3639803,7.613648],[-9.3643497,7.6124192],[-9.3645838,7.611144],[-9.3654307,7.610703],[-9.3660748,7.6101709],[-9.3659943,7.6084416],[-9.3666385,7.6075104],[-9.3673095,7.6053555],[-9.3662073,7.6029304],[-9.3661324,7.601761],[-9.3664335,7.6012837],[-9.3671386,7.6009308],[-9.3680622,7.600859],[-9.3683224,7.6005288],[-9.3682841,7.5999435],[-9.3679042,7.5992813],[-9.3682569,7.5981843],[-9.3690642,7.5973721],[-9.3702083,7.5963174],[-9.3708327,7.5955222],[-9.3719529,7.5932768],[-9.3741539,7.592931],[-9.3762206,7.5919732],[-9.3769542,7.590407],[-9.3778326,7.5894062],[-9.3785612,7.5884487],[-9.3787369,7.5866466],[-9.3776842,7.5858719],[-9.376999,7.5835626],[-9.3777237,7.5819162],[-9.3791556,7.5807378],[-9.3817298,7.5793841],[-9.3837365,7.5771726],[-9.3845144,7.5745729],[-9.3845843,7.5717348],[-9.3846323,7.5705828],[-9.3849438,7.569358],[-9.3836286,7.5662716],[-9.3834294,7.5648605],[-9.3845949,7.5637706],[-9.3871716,7.5574114],[-9.3903656,7.5553892],[-9.3912245,7.5529945],[-9.3946065,7.546582],[-9.3944723,7.5448525],[-9.3952506,7.5430165],[-9.3959908,7.5420952],[-9.3974453,7.5415957],[-9.3982919,7.5415509],[-9.3988805,7.5424306],[-9.3993559,7.5424844],[-9.399786,7.5420221],[-9.4002999,7.5407952],[-9.4008067,7.5402492],[-9.400914,7.536524],[-9.4033565,7.5325859],[-9.403276,7.5298984],[-9.4037433,7.5281851],[-9.4041575,7.5263631],[-9.4049213,7.5241993],[-9.4063358,7.5192545],[-9.4068458,7.5162742],[-9.4086173,7.5137995],[-9.4085905,7.5111917],[-9.4096372,7.5089298],[-9.4105747,7.5089953],[-9.4124254,7.5091245],[-9.4130312,7.5078875],[-9.4134081,7.5075428],[-9.4138696,7.5059381],[-9.4146319,7.5039145],[-9.4151982,7.5021418],[-9.4159869,7.4999586],[-9.4160402,7.4997684],[-9.4160855,7.4996069],[-9.4164149,7.4990517],[-9.4167609,7.4982743],[-9.4170752,7.4979619],[-9.4171428,7.4977868],[-9.4171579,7.4975686],[-9.4171255,7.4974376],[-9.4168337,7.4973251],[-9.4168136,7.497078],[-9.4167781,7.4971636],[-9.4163333,7.496989],[-9.4156241,7.4975255],[-9.4150411,7.4970846],[-9.4159816,7.4956406],[-9.4161173,7.494303],[-9.416298,7.493903],[-9.4165126,7.493554],[-9.416759,7.4932682],[-9.417432,7.4928483],[-9.4178186,7.4926813],[-9.4179778,7.4924659],[-9.4181506,7.4920542],[-9.4183432,7.4915173],[-9.4184521,7.4902968],[-9.4184176,7.489465],[-9.4189601,7.4872634],[-9.4196451,7.4856489],[-9.4204731,7.4838943],[-9.4213102,7.4824706],[-9.4218302,7.4819353],[-9.42231,7.4813349],[-9.4234462,7.4794234],[-9.4242657,7.4785335],[-9.4251314,7.477727],[-9.4255516,7.4770996],[-9.4257696,7.4766672],[-9.4258188,7.4761721],[-9.4256699,7.4756879],[-9.4252416,7.4746634],[-9.4248718,7.4739198],[-9.4247691,7.4734219],[-9.4248967,7.4728941],[-9.4256072,7.471902],[-9.4278927,7.4700477],[-9.4285396,7.4694923],[-9.4288136,7.4687602],[-9.4297444,7.4673945],[-9.430199,7.4668912],[-9.4306227,7.4666392],[-9.4313421,7.4666765],[-9.4322902,7.4671949],[-9.4331751,7.4672718],[-9.4335434,7.4666665],[-9.4341084,7.4664842],[-9.4344909,7.4659206],[-9.4350073,7.4659057],[-9.4352725,7.4653031],[-9.4354077,7.4647197],[-9.4354989,7.4640781],[-9.4355692,7.4638502],[-9.4359024,7.4635248],[-9.4362589,7.4631614],[-9.4365457,7.4629207],[-9.4368549,7.462306],[-9.4373063,7.4614216],[-9.4376648,7.4616496],[-9.4377771,7.4618022],[-9.4379739,7.4618197],[-9.4383026,7.46181],[-9.43882,7.4616108],[-9.4391444,7.4608315],[-9.4396659,7.4598894],[-9.4400083,7.4591914],[-9.4402262,7.4590817],[-9.4411364,7.4586234],[-9.441329,7.4582927],[-9.4412909,7.4579779],[-9.4410959,7.4568261],[-9.4411981,7.4562199],[-9.4415177,7.4556461],[-9.4422493,7.4551111],[-9.4430717,7.4548166],[-9.4439978,7.4546588],[-9.4447709,7.4547516],[-9.4452691,7.4547531],[-9.4457676,7.4547142],[-9.446216,7.4546313],[-9.4467398,7.454467],[-9.4467983,7.4540453],[-9.4467975,7.4537504],[-9.4467654,7.4531329],[-9.4467867,7.452009],[-9.4470765,7.4509734],[-9.4472114,7.4507255],[-9.4474284,7.4504966],[-9.4479124,7.4503687],[-9.4485749,7.4504284],[-9.448786,7.450538],[-9.4488766,7.4510328],[-9.449031,7.451373],[-9.4492273,7.4515448],[-9.4508445,7.4520609],[-9.4514328,7.4521563],[-9.4518995,7.4520063],[-9.4526613,7.4509405],[-9.453045,7.4504445],[-9.4534372,7.4502362],[-9.4538882,7.4503914],[-9.4542645,7.4505276],[-9.4545739,7.4506307],[-9.4549408,7.4506575],[-9.4553299,7.4506583],[-9.455616,7.4506966],[-9.4558046,7.4507481],[-9.4560483,7.4508146],[-9.4563088,7.4507869],[-9.4564596,7.4505763],[-9.4564479,7.4501205],[-9.4569847,7.4488237],[-9.4576773,7.4480511],[-9.4579789,7.4472706],[-9.4578862,7.4462071],[-9.4586001,7.4455529],[-9.4592517,7.4450581],[-9.4594563,7.4446415],[-9.4597489,7.4440431],[-9.4597894,7.4436826],[-9.459842,7.4434252],[-9.4598392,7.4428072],[-9.459754,7.4420125],[-9.4594793,7.4415651],[-9.4593998,7.4411229],[-9.459568,7.4408253],[-9.4601855,7.4401103],[-9.4611339,7.439254],[-9.4617082,7.4387355],[-9.4621217,7.4383418],[-9.4625195,7.4379814],[-9.4630816,7.4375535],[-9.4635979,7.4369589],[-9.4637406,7.4362953],[-9.463869,7.4353573],[-9.4642351,7.4347762],[-9.4641111,7.4339025],[-9.4640745,7.4336445],[-9.4645916,7.4331606],[-9.4651654,7.4327872],[-9.4660289,7.4318616],[-9.4667247,7.4312243],[-9.467676,7.4304644],[-9.4680571,7.4297827],[-9.4681522,7.4289229],[-9.468536,7.425298],[-9.4688363,7.4239632],[-9.468898,7.4230931],[-9.468893,7.422574],[-9.4687568,7.4221081],[-9.4681297,7.4216509],[-9.4668482,7.4209804],[-9.4660893,7.4202208],[-9.4657217,7.4197562],[-9.4656821,7.4193134],[-9.4658334,7.4189099],[-9.466116,7.418622],[-9.466527,7.4184471],[-9.4676988,7.4185472],[-9.4687537,7.4185316],[-9.4693879,7.4183571],[-9.4698427,7.4178647],[-9.4702486,7.4171194],[-9.4705116,7.4163198],[-9.4707184,7.415191],[-9.4710549,7.4146403],[-9.4715569,7.4140693],[-9.4717989,7.4135212],[-9.4719249,7.4131294],[-9.4718047,7.4127345],[-9.4714088,7.4121297],[-9.4708244,7.4114664],[-9.4706829,7.4108127],[-9.4707181,7.4103908],[-9.4702901,7.409194],[-9.470355,7.4087322],[-9.4700734,7.4079023],[-9.4701391,7.4067749],[-9.4698785,7.4058031],[-9.4703417,7.4053201],[-9.4707181,7.404926],[-9.4713136,7.4044081],[-9.4718572,7.4033373],[-9.4721965,7.4023099],[-9.4729308,7.4007898],[-9.4735083,7.3994156],[-9.4737364,7.3984109],[-9.4735648,7.396851],[-9.4739809,7.3952398],[-9.4744895,7.3948209],[-9.4750813,7.3944173],[-9.4757116,7.393757],[-9.4759351,7.3929381],[-9.476134,7.3916974],[-9.4760669,7.3910108],[-9.4758069,7.3901506],[-9.476081,7.3885156],[-9.4764949,7.3880284],[-9.4767125,7.3874809],[-9.4768849,7.3866465],[-9.4768579,7.385564],[-9.4775236,7.3841776],[-9.4782321,7.3823446],[-9.4787298,7.3814189],[-9.4796492,7.3802821],[-9.4820633,7.3791784],[-9.4835147,7.3784904],[-9.484128,7.3779709],[-9.4843266,7.37758],[-9.48436,7.3772027],[-9.4844362,7.3765486],[-9.4843338,7.376135],[-9.4841374,7.3757998],[-9.4837712,7.3756007],[-9.4827861,7.3754195],[-9.4821598,7.3752017],[-9.4814106,7.3745658],[-9.480836,7.3736069],[-9.4808459,7.3728039],[-9.4813761,7.3719518],[-9.4820244,7.3705542],[-9.4821104,7.3697402],[-9.4821735,7.3692851],[-9.4821032,7.3685109],[-9.4823192,7.3670423],[-9.4821389,7.3670154],[-9.4817229,7.3669383],[-9.4809772,7.3661272],[-9.4809892,7.3658751],[-9.4820301,7.364743],[-9.4852904,7.3630158],[-9.4889586,7.3592547],[-9.4914739,7.3541799],[-9.4926238,7.3530682],[-9.4939416,7.3513147],[-9.494064,7.3496947],[-9.4980556,7.3394607],[-9.5000518,7.3379629],[-9.5084088,7.3325457],[-9.511029,7.3321298],[-9.513432,7.3303073],[-9.5148545,7.3298429],[-9.5166446,7.3299433],[-9.5216701,7.3312847],[-9.5238349,7.3300493],[-9.5270165,7.3263872],[-9.5355064,7.3253103],[-9.5404553,7.3227759],[-9.546997,7.3183037],[-9.5601491,7.3118436],[-9.5621057,7.3085645],[-9.5630383,7.3073039],[-9.5667968,7.3071942],[-9.5728176,7.3063241],[-9.5782663,7.3026662],[-9.5858573,7.2988774],[-9.5920823,7.2997125],[-9.6048595,7.2878309],[-9.609012,7.2852961],[-9.6176366,7.2871972],[-9.6234662,7.2855337],[-9.6265008,7.2809394],[-9.6304138,7.2794343],[-9.6325606,7.2822875],[-9.6348264,7.2821101],[-9.6371518,7.2773192],[-9.6400736,7.2758997],[-9.6466752,7.2777857],[-9.6497758,7.2770168],[-9.6531148,7.2697418],[-9.6536515,7.2660746],[-9.6475696,7.2621117],[-9.6476624,7.2592913],[-9.6502528,7.2564334],[-9.6545267,7.2514861],[-9.6547844,7.2457273],[-9.6527571,7.2438936],[-9.6501335,7.2449583],[-9.6481062,7.2446625],[-9.6473311,7.2434204],[-9.6491795,7.2425924],[-9.6523397,7.2323591],[-9.6551422,7.2312351],[-9.6556192,7.2269761],[-9.6606874,7.2265029],[-9.6622377,7.2210017],[-9.6581831,7.2167427],[-9.6569906,7.2106498],[-9.6617011,7.2072188],[-9.6632514,7.208461],[-9.6670675,7.2079286],[-9.6692737,7.2036103],[-9.6731494,7.2040835],[-9.6763455,7.2021035],[-9.6823654,7.1979787],[-9.6860622,7.2007591],[-9.6911901,7.2014098],[-9.6932174,7.2040127],[-9.6987044,7.2033672],[-9.6999045,7.2025784],[-9.7010867,7.1973814],[-9.7021257,7.1961554],[-9.705322,7.1944844],[-9.7061705,7.1945815],[-9.7086394,7.197339],[-9.7099626,7.1979334],[-9.7126168,7.1980611],[-9.7152758,7.1993272],[-9.7196567,7.198795],[-9.7204531,7.1977252],[-9.7203734,7.1967035],[-9.718799,7.1957767],[-9.7185575,7.1940478],[-9.7200596,7.1877069],[-9.7192176,7.1848654],[-9.7197762,7.1832672],[-9.7206511,7.1826901],[-9.7240075,7.1844427],[-9.7269292,7.184477],[-9.7316977,7.1811841],[-9.7342981,7.1776082],[-9.7354547,7.1766557],[-9.739071,7.1755763],[-9.7409158,7.176033],[-9.7437983,7.1827565],[-9.7467497,7.1849317],[-9.7495984,7.1849129],[-9.7505443,7.1843042],[-9.7502492,7.1817942],[-9.7511047,7.179724],[-9.7519357,7.1788242],[-9.7556237,7.1784814],[-9.7585552,7.1786569],[-9.7626449,7.182882],[-9.7696017,7.1821289],[-9.7742396,7.1787824],[-9.7764742,7.1809158],[-9.7799737,7.1817942],[-9.7842743,7.1796608],[-9.788617,7.1810831],[-9.7905986,7.1886547],[-9.7952246,7.195791],[-9.7980867,7.1967967],[-9.8022604,7.1941346],[-9.810489,7.19656],[-9.8126952,7.2013517],[-9.8159318,7.2043871],[-9.8154998,7.2054396],[-9.8097066,7.2104603],[-9.8075929,7.2122704],[-9.8053709,7.2123882],[-9.8038643,7.2108948],[-9.8035107,7.209575],[-9.8026897,7.2090471],[-9.8020519,7.2098278],[-9.8003315,7.2124578],[-9.7996362,7.2151785],[-9.7984827,7.2173439],[-9.7965519,7.2209525],[-9.7942352,7.2240353],[-9.7920142,7.2264949],[-9.7921889,7.2312403],[-9.7927179,7.2336803],[-9.7925573,7.2356738],[-9.791501,7.2370564],[-9.7900073,7.2376375],[-9.7894794,7.2390738],[-9.7899116,7.2404443],[-9.7904418,7.2417945],[-9.7894901,7.2447919],[-9.7887533,7.2464773],[-9.7879944,7.2470822],[-9.7847237,7.2488869],[-9.783155,7.2512186],[-9.7822406,7.2529818],[-9.7810841,7.254033],[-9.7797595,7.2543227],[-9.7792096,7.2539997],[-9.7788548,7.2530574],[-9.7777268,7.2520747],[-9.7763285,7.2517515],[-9.7740264,7.2517732],[-9.7716099,7.2527945],[-9.7707596,7.2528922],[-9.7691475,7.2523101],[-9.7667107,7.2503859],[-9.7651462,7.2499574],[-9.7642889,7.2508032],[-9.7632247,7.2548741],[-9.7638656,7.2562634],[-9.7680007,7.2579302],[-9.7694125,7.2592377],[-9.7696375,7.2609728],[-9.7726551,7.2666352],[-9.7740002,7.2676886],[-9.7754538,7.2683995],[-9.7793684,7.2685196],[-9.7802871,7.2683399],[-9.7811929,7.2675254],[-9.7827174,7.2654373],[-9.7835676,7.2647725],[-9.7843527,7.2647143],[-9.7853509,7.2655633],[-9.7854197,7.2672728],[-9.7847879,7.2714076],[-9.7855981,7.2727432],[-9.7897884,7.2753377],[-9.7904597,7.2766444],[-9.7900399,7.2774056],[-9.7873784,7.2774203],[-9.783196,7.2760189],[-9.7817168,7.276171],[-9.7790124,7.279192],[-9.7747102,7.2840141],[-9.7723631,7.2860106],[-9.7690637,7.2916307],[-9.7673238,7.2937149],[-9.7654916,7.2940881],[-9.764741,7.2958116],[-9.7646609,7.2980925],[-9.7644005,7.2992962],[-9.7652443,7.3008265],[-9.7654897,7.3024213],[-9.7650454,7.3035541],[-9.7638957,7.3061927],[-9.7632,7.3088525],[-9.7619505,7.3114941],[-9.7603156,7.314213],[-9.7603796,7.3155653],[-9.7613849,7.3166545],[-9.7615005,7.3177835],[-9.7604374,7.3223806],[-9.7595627,7.3232562],[-9.7573227,7.3241837],[-9.7568039,7.324904],[-9.7576904,7.3277726],[-9.7578709,7.3323789],[-9.7559002,7.3352796],[-9.7538517,7.3404873],[-9.7518969,7.3450194],[-9.7507495,7.346122],[-9.7474741,7.3485032],[-9.7462436,7.3500131],[-9.7461893,7.3524719],[-9.7458333,7.3531067],[-9.7418903,7.3551969],[-9.741068,7.3553036],[-9.7343942,7.3553417],[-9.7343542,7.3560621],[-9.7333112,7.3558548],[-9.7331207,7.3571091],[-9.7332914,7.3593873],[-9.7339107,7.3601279],[-9.7350268,7.3610838],[-9.73626,7.3614474],[-9.7401987,7.360631],[-9.7410167,7.3607197],[-9.7408186,7.3616529],[-9.7380439,7.3632273],[-9.7366925,7.3635987],[-9.7337239,7.3627978],[-9.7329655,7.362418],[-9.7300089,7.3624492],[-9.7290027,7.3630448],[-9.7272529,7.3674519],[-9.7275458,7.3713438],[-9.7271556,7.3721566],[-9.7266355,7.3723322],[-9.7243206,7.3709844],[-9.7239708,7.3700718],[-9.7236715,7.3668322],[-9.724734,7.3655121],[-9.725079,7.3648825],[-9.7244233,7.3642386],[-9.7224309,7.3645574],[-9.7212903,7.3652819],[-9.7203581,7.3666337],[-9.7200345,7.3674675],[-9.7203602,7.3734826],[-9.720015,7.3756265],[-9.7197789,7.3769691],[-9.7189764,7.3781376],[-9.7180672,7.3805948],[-9.7183223,7.3812979],[-9.7195464,7.3820142],[-9.7222451,7.3804721],[-9.7230797,7.3805181],[-9.724031,7.3841704],[-9.7234824,7.3850278],[-9.7225019,7.385605],[-9.7207912,7.3858438],[-9.7192289,7.3863164],[-9.714993,7.3885298],[-9.7117764,7.3889318],[-9.7096082,7.3887492],[-9.7064864,7.3870212],[-9.7050527,7.3875995],[-9.7025891,7.3935227],[-9.7013981,7.393939],[-9.6991611,7.3941761],[-9.6945302,7.3930846],[-9.6937168,7.3931058],[-9.6913428,7.3941446],[-9.6889759,7.3960633],[-9.6859521,7.3981404],[-9.686569,7.3993292],[-9.6885668,7.4001823],[-9.690874,7.4010217],[-9.6942349,7.401919],[-9.6968978,7.401981],[-9.6980277,7.4024692],[-9.6987176,7.4039149],[-9.6988137,7.4056007],[-9.6995605,7.4075185],[-9.7003303,7.4088005],[-9.7003543,7.4101736],[-9.6991546,7.4109744],[-9.6981627,7.4111064],[-9.6969312,7.410783],[-9.6962391,7.4109941],[-9.6958156,7.4118288],[-9.6958592,7.4133587],[-9.6962334,7.4139078],[-9.6974645,7.4150005],[-9.6982567,7.4162928],[-9.6995539,7.4183011],[-9.700585,7.4189109],[-9.7023456,7.4197605],[-9.7045963,7.4198658],[-9.7057734,7.4194499],[-9.7064399,7.4194447],[-9.7073578,7.4207607],[-9.7074037,7.4218543],[-9.7073364,7.4230383],[-9.7062217,7.4242796],[-9.7068217,7.4269912],[-9.7070096,7.4297997],[-9.7083177,7.4321633],[-9.7096211,7.4370276],[-9.7099304,7.4372414],[-9.7112554,7.4398332],[-9.7167237,7.4431607],[-9.716875,7.4443196],[-9.71379,7.4466082],[-9.7131916,7.4494786],[-9.713223,7.4523538],[-9.712684,7.4525844],[-9.7109183,7.4528476],[-9.7100143,7.453398],[-9.7091047,7.4547184],[-9.7067169,7.4602716],[-9.7057335,7.4617415],[-9.7048659,7.462094],[-9.7035728,7.4623604],[-9.702655,7.4622687],[-9.7018518,7.4628293],[-9.7006698,7.4644136],[-9.6999765,7.4650027],[-9.6972289,7.4650556],[-9.6956639,7.4657501],[-9.6919919,7.4696206],[-9.6870532,7.4719983],[-9.6866762,7.4726224],[-9.6872558,7.4738252],[-9.6880372,7.4744085],[-9.6888588,7.474824],[-9.68929,7.4785533],[-9.6898616,7.4799752],[-9.6896962,7.4812502],[-9.6908324,7.4833113],[-9.6921094,7.4835146],[-9.6928743,7.4836373],[-9.6928567,7.4849794],[-9.6920695,7.4858379],[-9.6900971,7.4879592],[-9.687397,7.4901471],[-9.6847349,7.4918082],[-9.6843986,7.4927447],[-9.6845744,7.4963109],[-9.6851638,7.4977357],[-9.6859135,7.4998211],[-9.6856706,7.5008747],[-9.6847096,7.5012676],[-9.6832309,7.5011699],[-9.6770302,7.5014597],[-9.6756552,7.5021786],[-9.6747115,7.5032492],[-9.6734027,7.5063427],[-9.67288,7.5068335],[-9.6681476,7.5089234],[-9.6603652,7.5036651],[-9.6592254,7.5043785],[-9.658643,7.5039367],[-9.6582735,7.5049741],[-9.6577713,7.5052886],[-9.657844,7.50618],[-9.6584326,7.5133847],[-9.6564895,7.516303],[-9.6537755,7.5176034],[-9.652217,7.5193114],[-9.6480447,7.5203129],[-9.6469121,7.5232728],[-9.6443237,7.5263003],[-9.6417098,7.5282043],[-9.6420815,7.5295267],[-9.6407985,7.5309867],[-9.6366815,7.5333065],[-9.6373656,7.5344985],[-9.6411627,7.5411717],[-9.6521743,7.5605217],[-9.6546862,7.569328],[-9.657069,7.577681],[-9.6635824,7.5915989],[-9.6665841,7.5951084],[-9.6728508,7.6024349],[-9.6818216,7.6129318],[-9.6894373,7.6218428],[-9.7069876,7.6341225],[-9.721285,7.6418725],[-9.737535,7.6522095],[-9.7410665,7.6548338],[-9.7430455,7.6563047],[-9.7446347,7.6574857],[-9.7542766,7.6646501],[-9.7635814,7.6660775],[-9.7661643,7.6664737],[-9.7756465,7.6724699],[-9.7765023,7.673011],[-9.7874405,7.6799268],[-9.8237711,7.6986583],[-9.8367492,7.7053483],[-9.8408917,7.7064335],[-9.8689759,7.713789],[-9.8699156,7.714509],[-9.8698293,7.7149908],[-9.8732888,7.7170939],[-9.9021871,7.739235],[-9.9175833,7.7452061],[-9.9189444,7.7457339],[-9.9239957,7.747693],[-9.9352114,7.7481553],[-9.9354559,7.7486646],[-9.9359318,7.7490779],[-9.9488621,7.7490493],[-9.9516746,7.749043],[-9.9541163,7.7481636],[-9.9552656,7.7477501],[-9.9628352,7.7450243],[-9.9789372,7.739159],[-9.9853949,7.7364156],[-9.9867763,7.7358285],[-9.9915685,7.7337926],[-9.9933328,7.7337596],[-9.9974121,7.7336834],[-10.0093496,7.7334598],[-10.0229939,7.733204],[-10.0232795,7.733811],[-10.023583,7.7338103],[-10.0238953,7.7351198],[-10.0240522,7.7357774],[-10.0252776,7.7409172],[-10.0262583,7.7411416],[-10.0283004,7.747423],[-10.0392424,7.7475496],[-10.0407718,7.7476199],[-10.044152,7.7476116],[-10.0446941,7.7476103],[-10.0452106,7.7421938],[-10.0461471,7.7374631],[-10.0535246,7.7374144],[-10.0900465,7.7371723],[-10.0952705,7.7371375],[-10.0956451,7.7371348],[-10.0961498,7.7384833],[-10.0968101,7.7402469],[-10.0977857,7.7401805],[-10.1095751,7.7409515],[-10.1121071,7.7412762],[-10.1198593,7.7381798],[-10.1500448,7.7345373],[-10.1750395,7.732526],[-10.1760167,7.7340765],[-10.1776258,7.7366287],[-10.1783006,7.7376991],[-10.1689153,7.7487358],[-10.1672459,7.7538144],[-10.1661363,7.7588651],[-10.1647364,7.763968],[-10.168986,7.7743194],[-10.1777629,7.7778579],[-10.1820508,7.7764193],[-10.1845754,7.7755717],[-10.1904329,7.7800891],[-10.190786,7.7901278],[-10.1867666,7.8042264],[-10.1877628,7.8119962],[-10.1857234,7.8155595],[-10.1861622,7.8167848],[-10.1868087,7.8191231],[-10.1942759,7.8184543],[-10.2080718,7.8087021],[-10.2085865,7.8085124],[-10.2140602,7.806493],[-10.2149659,7.8066136],[-10.2244338,7.8037952],[-10.2302451,7.8086467],[-10.2306186,7.8089587],[-10.2375253,7.8176481],[-10.2390929,7.8196206],[-10.2404051,7.824151],[-10.2365442,7.8300305],[-10.2310295,7.8384272],[-10.2312304,7.8386731],[-10.2335701,7.8415376],[-10.2338002,7.8418195],[-10.2386684,7.8408336],[-10.2484003,7.8372428],[-10.2502618,7.8404031],[-10.250685,7.841122],[-10.2539393,7.8433794],[-10.2621519,7.8387975],[-10.2654186,7.8370909],[-10.2657174,7.8369351],[-10.2672652,7.8345684],[-10.2684039,7.8325828],[-10.2786526,7.8234511],[-10.2796442,7.821985],[-10.2848192,7.8171816],[-10.2870696,7.8179767],[-10.2879136,7.8180782],[-10.2884903,7.8175984],[-10.2791729,7.8499391],[-10.2789674,7.8507525],[-10.2818858,7.8524867],[-10.2854744,7.8546185],[-10.2950591,7.8560462],[-10.3034935,7.8531059],[-10.3049208,7.8540103],[-10.3090889,7.8566521],[-10.3116287,7.8582618],[-10.3116358,7.8605096],[-10.311647,7.8640908],[-10.3154696,7.8663165],[-10.317178,7.8673115],[-10.3198191,7.8809043],[-10.3176794,7.8829921],[-10.3140435,7.8865401],[-10.3098317,7.888506],[-10.3092473,7.8887786],[-10.3015876,7.8945083],[-10.2991148,7.906876],[-10.2972919,7.9140134],[-10.2930033,7.9260007],[-10.2973885,7.9261493],[-10.3119805,7.9183315],[-10.3217304,7.9202438],[-10.325147,7.9258805],[-10.3266285,7.9283243],[-10.3227535,7.9354604],[-10.3175906,7.9461637],[-10.3176061,7.951021],[-10.3146982,7.9558875],[-10.3044942,7.9648251],[-10.2964212,7.9800704],[-10.2948387,7.9933526],[-10.2922612,8.0001613],[-10.2931589,8.001169],[-10.299597,8.0083959],[-10.3070627,8.0064291],[-10.3107415,8.0064175],[-10.3151846,8.0064033],[-10.3258058,8.0128267],[-10.3269029,8.0134902],[-10.328771,8.0096538],[-10.3343252,7.9982465],[-10.3366023,7.9992107],[-10.3396708,7.9977714],[-10.3416118,7.9968608],[-10.3463333,7.9946451],[-10.3727801,7.9859768],[-10.3769004,7.9841506],[-10.3935291,7.9774336],[-10.397434,7.975856],[-10.3978737,7.9801968],[-10.3983401,7.9847993],[-10.3987065,7.9884169],[-10.3987786,7.9891282],[-10.4081977,7.9877715],[-10.4143697,7.9887513],[-10.4222721,7.9875984],[-10.4234607,7.9874248],[-10.4308991,7.9848292],[-10.4319297,7.9844521],[-10.4364487,7.9894879],[-10.4377663,7.990937],[-10.4432851,7.9899468],[-10.4444468,7.9894013],[-10.4481495,7.9876629],[-10.4535086,7.9849154],[-10.4633192,7.9798859],[-10.4646862,7.9791853],[-10.471668,7.9786751],[-10.4845915,7.9747502],[-10.488159,7.9732974],[-10.5034534,7.9656085],[-10.5105884,7.9626687],[-10.5258338,7.9571083],[-10.5355706,7.9551294],[-10.5446492,7.9508864],[-10.5446576,7.9531527],[-10.5447475,7.9584574],[-10.5476196,7.9635031],[-10.5486424,7.9591482],[-10.549218,7.9566978],[-10.5521411,7.9566869],[-10.5534148,7.9498823],[-10.5569912,7.9508404],[-10.5605432,7.9453225],[-10.5621696,7.9462342],[-10.5644893,7.9475338],[-10.5664781,7.9430272],[-10.5685147,7.9384113],[-10.5780042,7.9317039],[-10.5930387,7.9237415],[-10.6050223,7.9209161],[-10.6050091,7.9740901],[-10.6051653,8.0405416]]]]}]}
