# Supplementary material
Source: ML conference proceedings conference paper supplement (https://proceedings.neurips.cc/paper_files/paper/2022/hash/9d3faa41886997cfc2128b930077fa49-Abstract.html)
Supplement: Supplementary file 1 [file 9d3faa41886997cfc2128b930077fa49-Supplemental-Conference.zip › code/ebola/map/geojson/lola.geojson]

{"type":"GeometryCollection","geometries":[{"type":"MultiPolygon","coordinates":[[[[-8.5817851,7.6957766],[-8.581958,7.7132047],[-8.5741704,7.7234941],[-8.5720327,7.7334807],[-8.5683679,7.7467957],[-8.5627181,7.7593538],[-8.5647031,7.776299],[-8.5781406,7.7847714],[-8.5898796,7.7857481],[-8.6041321,7.7917389],[-8.6093149,7.8135616],[-8.6037003,7.829821],[-8.5842649,7.8537809],[-8.5769227,7.8704665],[-8.5682848,7.8820177],[-8.5652615,7.89913],[-8.5743313,7.9136748],[-8.5812417,7.9307858],[-8.5747632,7.9483238],[-8.5738994,7.9650055],[-8.5695805,7.9778372],[-8.5531685,8.0124807],[-8.5380521,8.0278769],[-8.5397797,8.0437001],[-8.5462581,8.0582398],[-8.5648296,8.0749171],[-8.5768175,8.0805024],[-8.5771629,8.0806635],[-8.5795141,8.0817589],[-8.5834012,8.0894557],[-8.5754172,8.1000857],[-8.5708762,8.1061317],[-8.5665572,8.1151108],[-8.5683908,8.119195],[-8.5751951,8.134351],[-8.5786503,8.1548729],[-8.5726038,8.1634234],[-8.5695805,8.1753937],[-8.5605107,8.1865088],[-8.5458262,8.1886462],[-8.5328694,8.1993334],[-8.5086832,8.2001883],[-8.4862246,8.2057455],[-8.4711083,8.2057455],[-8.4629023,8.2087379],[-8.4542643,8.2078829],[-8.4460583,8.2113027],[-8.4400118,8.2241265],[-8.439148,8.239942],[-8.4421713,8.2544746],[-8.4641221,8.2724402],[-8.4796303,8.2933284],[-8.4947076,8.334675],[-8.5168929,8.3700506],[-8.5003078,8.3872442],[-8.4886767,8.4038647],[-8.4847997,8.4290071],[-8.4744609,8.4494607],[-8.4615375,8.4584088],[-8.4326751,8.4720436],[-8.4033819,8.4809912],[-8.3904585,8.4912168],[-8.3740888,8.4937731],[-8.3564268,8.4882344],[-8.3396263,8.4963295],[-8.3310107,8.4912168],[-8.3155025,8.4673567],[-8.3043022,8.4596871],[-8.284917,8.459261],[-8.2822815,8.4425877],[-8.281527,8.4414002],[-8.2791261,8.4415359],[-8.2789203,8.4409592],[-8.2795034,8.4402467],[-8.2793319,8.4385504],[-8.2802579,8.4370237],[-8.2790575,8.436413],[-8.2754905,8.4377022],[-8.2759021,8.4395003],[-8.2762451,8.4424519],[-8.2770339,8.4434697],[-8.2773426,8.4458446],[-8.2762451,8.4464892],[-8.2747703,8.4455053],[-8.2718549,8.4452],[-8.2699343,8.4456749],[-8.2678764,8.4440126],[-8.2671561,8.4433001],[-8.2665388,8.4430626],[-8.2662644,8.4438429],[-8.2668474,8.4445554],[-8.2666759,8.4452339],[-8.2657499,8.4449286],[-8.2654069,8.4434358],[-8.2648582,8.4435715],[-8.2647896,8.4443518],[-8.2652011,8.4449286],[-8.2651668,8.4454375],[-8.2641379,8.4458446],[-8.2638978,8.4466249],[-8.2630061,8.4472355],[-8.2629718,8.4482533],[-8.2635548,8.4491354],[-8.2636234,8.4507977],[-8.2602965,8.4516459],[-8.2588217,8.4509334],[-8.25793,8.4526297],[-8.2573812,8.45341],[-8.2565923,8.4529011],[-8.2554605,8.4525279],[-8.2538485,8.45341],[-8.2541915,8.4546313],[-8.2534026,8.4568704],[-8.2519621,8.4568025],[-8.2514819,8.4563276],[-8.2519621,8.4550723],[-8.250796,8.4540206],[-8.2496985,8.4548688],[-8.2478807,8.4549366],[-8.2468517,8.4556151],[-8.2460286,8.4557169],[-8.2455141,8.4547331],[-8.2445538,8.4535118],[-8.243662,8.4507977],[-8.244248,8.4488991],[-8.2438193,8.447559],[-8.2429618,8.4464225],[-8.241367,8.4455744],[-8.2403038,8.445286],[-8.2391157,8.4452041],[-8.239766,8.4443999],[-8.2397155,8.4443289],[-8.2396841,8.444193],[-8.2396371,8.443807],[-8.2393891,8.443525],[-8.2393841,8.443151],[-8.2399441,8.442674],[-8.2399501,8.442409],[-8.2397931,8.442044],[-8.2400231,8.441791],[-8.2398721,8.441512],[-8.2399491,8.441048],[-8.2393981,8.439867],[-8.2394761,8.439482],[-8.2396391,8.43914],[-8.2394151,8.438528],[-8.2394551,8.438241],[-8.2397051,8.43783],[-8.2396341,8.437277],[-8.2393661,8.43667],[-8.2393121,8.436135],[-8.2393701,8.435621],[-8.2399541,8.435033],[-8.2399611,8.434849],[-8.2397341,8.434803],[-8.2399261,8.434512],[-8.2400431,8.433928],[-8.2399411,8.433841],[-8.2399651,8.433661],[-8.2400321,8.433599],[-8.2400701,8.433473],[-8.2400251,8.433253],[-8.2402181,8.433098],[-8.2401951,8.432965],[-8.2400631,8.432761],[-8.2401091,8.432576],[-8.2404041,8.432282],[-8.2407201,8.431134],[-8.2408981,8.431148],[-8.2409431,8.431094],[-8.2409631,8.430809],[-8.2405951,8.429964],[-8.2404721,8.429548],[-8.2405651,8.429335],[-8.2405281,8.428799],[-8.2404131,8.428572],[-8.2400211,8.428301],[-8.2400371,8.427753],[-8.2399661,8.427339],[-8.2392021,8.426805],[-8.2389331,8.426361],[-8.2385671,8.425987],[-8.2382401,8.425887],[-8.2381371,8.425593],[-8.2375771,8.425253],[-8.2369431,8.425091],[-8.2367701,8.424807],[-8.2365931,8.424672],[-8.2364901,8.424444],[-8.2358371,8.424051],[-8.2356401,8.423876],[-8.2356541,8.423679],[-8.2346071,8.423453],[-8.2344791,8.423301],[-8.2345631,8.422857],[-8.2341731,8.422584],[-8.2345341,8.421056],[-8.2344981,8.419971],[-8.2347931,8.419025],[-8.2353971,8.417998],[-8.2380121,8.415615],[-8.2360521,8.413698],[-8.2345601,8.412386],[-8.2334681,8.411729],[-8.2323361,8.410943],[-8.2313441,8.410033],[-8.2305791,8.408999],[-8.2299441,8.408231],[-8.2287431,8.406566],[-8.2268091,8.404543],[-8.2260201,8.403404],[-8.2262991,8.401415],[-8.2273401,8.400821],[-8.2274751,8.400669],[-8.2278051,8.400648],[-8.2285581,8.400486],[-8.2293691,8.400095],[-8.2302991,8.399506],[-8.2306241,8.398813],[-8.2305081,8.398232],[-8.2305661,8.398046],[-8.2307961,8.397637],[-8.2305711,8.396054],[-8.2307391,8.395393],[-8.2310171,8.395037],[-8.2309711,8.394699],[-8.2305861,8.394719],[-8.2305011,8.39456],[-8.2305661,8.393301],[-8.2304621,8.393218],[-8.2305121,8.39291],[-8.2304471,8.392535],[-8.2302271,8.392414],[-8.2301301,8.392469],[-8.2300981,8.392604],[-8.2299131,8.392579],[-8.2299051,8.392301],[-8.2296331,8.392145],[-8.2293871,8.391666],[-8.2298741,8.391514],[-8.2297681,8.391243],[-8.2301631,8.390279],[-8.2303021,8.38949],[-8.2296381,8.389185],[-8.2302591,8.387622],[-8.2302581,8.387042],[-8.2301281,8.385569],[-8.2298311,8.385513],[-8.2298051,8.385243],[-8.2290831,8.384345],[-8.2291671,8.384002],[-8.2287181,8.383294],[-8.2289381,8.382844],[-8.2271041,8.38074],[-8.2271801,8.380526],[-8.2267521,8.380369],[-8.2258701,8.380175],[-8.2255731,8.380524],[-8.2252791,8.380493],[-8.2249741,8.380303],[-8.2250421,8.380196],[-8.2250881,8.379794],[-8.2250371,8.379721],[-8.2244081,8.379272],[-8.2241381,8.379165],[-8.2240701,8.378794],[-8.2238991,8.378399],[-8.2229611,8.377302],[-8.2224351,8.376867],[-8.2221301,8.376314],[-8.2216771,8.376181],[-8.2211321,8.375157],[-8.2204801,8.374286],[-8.2195591,8.373974],[-8.2195261,8.373433],[-8.2196731,8.372665],[-8.2200641,8.372135],[-8.2198501,8.371183],[-8.2198071,8.370561],[-8.2198741,8.369929],[-8.2195301,8.36983],[-8.2193431,8.369026],[-8.2189931,8.368399],[-8.2192651,8.367987],[-8.2189061,8.3677],[-8.2186301,8.367551],[-8.2185651,8.367352],[-8.2188971,8.367318],[-8.2190891,8.367062],[-8.2191471,8.366293],[-8.2188271,8.365925],[-8.2187221,8.365377],[-8.2190001,8.36495],[-8.2187651,8.364851],[-8.2185651,8.36464],[-8.2182931,8.364677],[-8.2180691,8.364552],[-8.2181781,8.364254],[-8.2181641,8.364077],[-8.2183491,8.363842],[-8.2183451,8.363685],[-8.2181961,8.363443],[-8.2181131,8.363137],[-8.2169221,8.362391],[-8.2162951,8.361098],[-8.2157231,8.360207],[-8.2150071,8.35958],[-8.2152921,8.358752],[-8.2157501,8.35863],[-8.2158741,8.358444],[-8.2158241,8.358276],[-8.2155351,8.358164],[-8.2151631,8.358304],[-8.2150191,8.35826],[-8.2149651,8.358161],[-8.2149651,8.357937],[-8.2151051,8.357678],[-8.2154781,8.357445],[-8.2154201,8.356996],[-8.2166281,8.355356],[-8.2170331,8.353787],[-8.2173261,8.353275],[-8.2177381,8.353077],[-8.2178541,8.352752],[-8.2178311,8.352729],[-8.2177541,8.352723],[-8.2176221,8.352789],[-8.2175591,8.352899],[-8.2173551,8.352717],[-8.2174321,8.352468],[-8.2178141,8.352513],[-8.2177651,8.352266],[-8.2177991,8.351986],[-8.2177191,8.351941],[-8.2174761,8.352077],[-8.2173991,8.352013],[-8.2173191,8.351826],[-8.2173451,8.351752],[-8.2174561,8.35168],[-8.2176461,8.351655],[-8.2175781,8.351479],[-8.2176171,8.351286],[-8.2178431,8.351393],[-8.2180921,8.351227],[-8.2181391,8.351047],[-8.2177821,8.350856],[-8.2178041,8.350719],[-8.2182271,8.350651],[-8.2186091,8.350434],[-8.2186341,8.350068],[-8.2194601,8.349761],[-8.2197731,8.349715],[-8.2197661,8.350148],[-8.2201541,8.350126],[-8.2202271,8.349739],[-8.2199211,8.349094],[-8.2206101,8.348187],[-8.2209971,8.346908],[-8.2212521,8.346258],[-8.2212971,8.345011],[-8.2214981,8.344177],[-8.2218301,8.343501],[-8.2220151,8.341702],[-8.2213771,8.339009],[-8.2216701,8.33854],[-8.2221811,8.338561],[-8.2225861,8.337704],[-8.2225251,8.336688],[-8.2227221,8.336204],[-8.2225011,8.335508],[-8.2227991,8.335132],[-8.2232811,8.334694],[-8.2242771,8.334129],[-8.2254421,8.33334],[-8.2253341,8.332668],[-8.2255131,8.332232],[-8.2260651,8.331617],[-8.2264651,8.331397],[-8.2266981,8.330722],[-8.2264971,8.329998],[-8.2266311,8.329186],[-8.2269051,8.329013],[-8.2274981,8.328274],[-8.2274401,8.327472],[-8.2270041,8.327123],[-8.2269941,8.326832],[-8.2270601,8.326592],[-8.2272271,8.326411],[-8.2274181,8.326059],[-8.2275931,8.325837],[-8.2277731,8.326283],[-8.2279241,8.326138],[-8.2281061,8.325687],[-8.2281411,8.325288],[-8.2280591,8.325117],[-8.2274531,8.324404],[-8.2276931,8.32382],[-8.2276551,8.323313],[-8.2284271,8.323664],[-8.2286891,8.323551],[-8.2287901,8.323119],[-8.2286851,8.322272],[-8.2280421,8.321348],[-8.2278281,8.320905],[-8.2274401,8.320881],[-8.2272051,8.32066],[-8.2272111,8.32045],[-8.2273951,8.320371],[-8.2273451,8.320191],[-8.2273311,8.319766],[-8.2272101,8.319472],[-8.2268951,8.319432],[-8.2267131,8.319258],[-8.2264411,8.318859],[-8.2262981,8.317955],[-8.2255841,8.317383],[-8.2254181,8.316622],[-8.2249651,8.315789],[-8.2247521,8.314933],[-8.2248531,8.31424],[-8.2245141,8.313648],[-8.2243711,8.31272],[-8.2240381,8.311887],[-8.2242101,8.310868],[-8.2242041,8.310031],[-8.2243891,8.308065],[-8.2237281,8.307271],[-8.2231231,8.30765],[-8.2228801,8.306342],[-8.2224321,8.306099],[-8.2224251,8.305935],[-8.2225981,8.30561],[-8.2230951,8.305738],[-8.2231721,8.304891],[-8.2226221,8.303835],[-8.2218681,8.303733],[-8.2212891,8.303514],[-8.2209101,8.30269],[-8.2211971,8.302357],[-8.2211501,8.302204],[-8.2208791,8.30226],[-8.2206571,8.30222],[-8.2208471,8.301725],[-8.2208581,8.301598],[-8.2201591,8.3016],[-8.2198511,8.301696],[-8.2196251,8.301647],[-8.2195551,8.301181],[-8.2197121,8.300344],[-8.2191921,8.299778],[-8.2185241,8.299221],[-8.2187281,8.297804],[-8.2185861,8.297081],[-8.2184921,8.296858],[-8.2183751,8.296723],[-8.2179301,8.296778],[-8.2178411,8.296669],[-8.2178611,8.296531],[-8.2178151,8.296445],[-8.2176641,8.296395],[-8.2178331,8.295827],[-8.2183611,8.294581],[-8.2184191,8.293896],[-8.2190881,8.293522],[-8.2192431,8.292817],[-8.2190861,8.292495],[-8.2196831,8.290441],[-8.2196001,8.289882],[-8.2193041,8.289825],[-8.2192621,8.289658],[-8.2192891,8.289359],[-8.2194091,8.289145],[-8.2196051,8.289045],[-8.2196131,8.288929],[-8.2194921,8.288876],[-8.2194841,8.288655],[-8.2195911,8.28857],[-8.2195741,8.288441],[-8.2197671,8.288279],[-8.2200781,8.28822],[-8.2204951,8.287666],[-8.2205271,8.287343],[-8.2206351,8.287047],[-8.2206551,8.286565],[-8.2209151,8.286289],[-8.2209901,8.286042],[-8.2211691,8.285717],[-8.2220761,8.284428],[-8.2228951,8.283548],[-8.2231081,8.282817],[-8.2233731,8.282286],[-8.2233201,8.28185],[-8.2233551,8.281734],[-8.2235661,8.281504],[-8.2235111,8.281047],[-8.2238671,8.279862],[-8.2237911,8.279258],[-8.2231601,8.278865],[-8.2231441,8.278562],[-8.2228981,8.278404],[-8.2228671,8.27827],[-8.2228921,8.278159],[-8.2230841,8.278035],[-8.2229431,8.27795],[-8.2226791,8.277996],[-8.2226891,8.277882],[-8.2228101,8.277822],[-8.2228371,8.277745],[-8.2227521,8.277692],[-8.2226701,8.277547],[-8.2226891,8.277447],[-8.2228721,8.277336],[-8.2229101,8.277233],[-8.2228971,8.277088],[-8.2226571,8.276885],[-8.2224271,8.27617],[-8.2226651,8.275848],[-8.2236701,8.27532],[-8.2240491,8.275291],[-8.2241701,8.275364],[-8.2241621,8.275715],[-8.2242571,8.27575],[-8.2245171,8.275599],[-8.2246491,8.27557],[-8.2246871,8.275611],[-8.2246141,8.275723],[-8.2246591,8.275812],[-8.2248641,8.275753],[-8.2252801,8.275499],[-8.2254231,8.275203],[-8.2254711,8.27491],[-8.2269131,8.274004],[-8.2285951,8.273574],[-8.2285881,8.273008],[-8.2284311,8.272696],[-8.2286891,8.272411],[-8.2293011,8.272321],[-8.2298241,8.272392],[-8.2302561,8.272509],[-8.2304361,8.27251],[-8.2304261,8.272243],[-8.2304791,8.272022],[-8.2308451,8.271603],[-8.2310621,8.271584],[-8.2311791,8.271481],[-8.2314851,8.271418],[-8.2317391,8.271454],[-8.2317151,8.271773],[-8.2317951,8.27184],[-8.2319041,8.271824],[-8.2320151,8.271736],[-8.2322271,8.271755],[-8.2323101,8.27149],[-8.2325851,8.271528],[-8.2326211,8.271367],[-8.2328211,8.271229],[-8.2329841,8.271246],[-8.2331541,8.271333],[-8.2332361,8.271267],[-8.2333431,8.271266],[-8.2334331,8.271092],[-8.2337071,8.271015],[-8.2339711,8.270724],[-8.2339811,8.270528],[-8.2339451,8.270467],[-8.2342131,8.270288],[-8.2345471,8.269898],[-8.2344111,8.269723],[-8.2348341,8.26948],[-8.2350671,8.269418],[-8.2351391,8.269177],[-8.2352251,8.269119],[-8.2355331,8.269278],[-8.2356161,8.269275],[-8.2357721,8.26866],[-8.2361211,8.268],[-8.2361841,8.267989],[-8.2362431,8.268064],[-8.2363991,8.268363],[-8.2365581,8.26837],[-8.2366841,8.268304],[-8.2365211,8.26797],[-8.2365691,8.267895],[-8.2367361,8.26794],[-8.2369901,8.26781],[-8.2370391,8.267962],[-8.2371371,8.267983],[-8.2372311,8.267809],[-8.2371931,8.267605],[-8.2372291,8.267477],[-8.2372821,8.267443],[-8.2375341,8.26748],[-8.2375861,8.267741],[-8.2379371,8.26761],[-8.2378791,8.267468],[-8.2379821,8.267176],[-8.2380681,8.267146],[-8.2382741,8.267221],[-8.2384281,8.267161],[-8.2384611,8.266976],[-8.2381861,8.266619],[-8.2382911,8.266466],[-8.2384751,8.266517],[-8.2385201,8.266116],[-8.2383471,8.265786],[-8.2387371,8.265518],[-8.2387241,8.265077],[-8.2386401,8.264747],[-8.2385381,8.263638],[-8.2391991,8.263297],[-8.2392031,8.261927],[-8.2391371,8.2614],[-8.2387311,8.260874],[-8.2389561,8.259108],[-8.2395011,8.258478],[-8.2401411,8.258721],[-8.2405921,8.25725],[-8.2414391,8.257058],[-8.2417601,8.256689],[-8.2414891,8.256172],[-8.2410991,8.255712],[-8.2417411,8.254804],[-8.2423251,8.253637],[-8.2429651,8.253105],[-8.2428551,8.252353],[-8.2424471,8.251893],[-8.2433101,8.250998],[-8.2435741,8.250789],[-8.2437531,8.250386],[-8.2436681,8.249944],[-8.2434371,8.24968],[-8.2430831,8.249636],[-8.2424821,8.249721],[-8.2420261,8.249285],[-8.2420761,8.248664],[-8.2424521,8.24832],[-8.2424821,8.247642],[-8.2417521,8.246896],[-8.2414991,8.246231],[-8.2407761,8.245868],[-8.2404311,8.245403],[-8.2404761,8.245098],[-8.2408121,8.244927],[-8.2413231,8.244842],[-8.2416081,8.244506],[-8.2417361,8.244074],[-8.2417201,8.243268],[-8.2418891,8.242767],[-8.2419211,8.24239],[-8.2418061,8.241237],[-8.2429731,8.24043],[-8.2431541,8.240015],[-8.2432091,8.239632],[-8.2429871,8.239214],[-8.2425111,8.238935],[-8.2426771,8.238674],[-8.2432591,8.238243],[-8.2431771,8.237456],[-8.2427331,8.237075],[-8.2427461,8.236802],[-8.2435501,8.236008],[-8.2434491,8.235372],[-8.2424611,8.233701],[-8.2416811,8.234133],[-8.2412721,8.233563],[-8.2403571,8.233743],[-8.2401801,8.23436],[-8.2398971,8.234467],[-8.2390191,8.234113],[-8.2371601,8.23313],[-8.2357201,8.232729],[-8.2343671,8.232506],[-8.2339741,8.232322],[-8.2338201,8.232197],[-8.2322811,8.233021],[-8.2314931,8.233269],[-8.2313211,8.232774],[-8.2308651,8.232515],[-8.2306701,8.232481],[-8.2304401,8.232235],[-8.2300791,8.231981],[-8.2292051,8.231469],[-8.2290491,8.231433],[-8.2284951,8.230948],[-8.2277191,8.231029],[-8.2273041,8.230742],[-8.2267281,8.230261],[-8.2266781,8.229889],[-8.2266031,8.229708],[-8.2267371,8.229616],[-8.2269741,8.229559],[-8.2268961,8.22911],[-8.2266231,8.22892],[-8.2261771,8.228323],[-8.2256061,8.228891],[-8.2248871,8.229007],[-8.2244861,8.229494],[-8.2238001,8.229677],[-8.2231171,8.230691],[-8.2221341,8.230866],[-8.2214821,8.230685],[-8.2212461,8.230103],[-8.2205281,8.229697],[-8.2192021,8.22909],[-8.2174021,8.2288],[-8.2171781,8.228861],[-8.2165041,8.228407],[-8.2159731,8.228309],[-8.2154461,8.228336],[-8.2141991,8.227159],[-8.2132611,8.226716],[-8.2117471,8.226865],[-8.2114821,8.226519],[-8.2107211,8.22608],[-8.2101001,8.225655],[-8.2091481,8.225512],[-8.2079491,8.224732],[-8.2068851,8.225043],[-8.2066991,8.224272],[-8.2065791,8.224057],[-8.2062641,8.223966],[-8.2058141,8.223645],[-8.2059861,8.222465],[-8.2062271,8.221501],[-8.2062461,8.220833],[-8.2061371,8.219776],[-8.2062211,8.219249],[-8.2065411,8.218038],[-8.2063271,8.217129],[-8.2054341,8.217028],[-8.2054751,8.215948],[-8.2051651,8.215258],[-8.2046521,8.214585],[-8.2045791,8.213585],[-8.2041351,8.21231],[-8.2014711,8.213216],[-8.2008121,8.213131],[-8.1993231,8.214232],[-8.1986991,8.214635],[-8.1980811,8.214928],[-8.1976741,8.215218],[-8.1973811,8.215055],[-8.1971681,8.215015],[-8.1966611,8.215715],[-8.1958061,8.215903],[-8.1948681,8.215194],[-8.1939901,8.21473],[-8.1934601,8.214314],[-8.1937651,8.213501],[-8.1937841,8.213295],[-8.1937401,8.211832],[-8.1935711,8.210978],[-8.1924591,8.209799],[-8.1919631,8.207726],[-8.1893511,8.206642],[-8.1883471,8.206735],[-8.1847311,8.207568],[-8.1851271,8.205154],[-8.1850491,8.20391],[-8.1844141,8.202715],[-8.1835771,8.20186],[-8.1822341,8.201487],[-8.1821711,8.200754],[-8.1818411,8.200258],[-8.1813651,8.199725],[-8.1805731,8.198392],[-8.1802301,8.196659],[-8.1791471,8.195113],[-8.1781641,8.194203],[-8.1770811,8.193284],[-8.1764121,8.191229],[-8.1762721,8.190453],[-8.1762981,8.189726],[-8.1758971,8.188059],[-8.1756281,8.187338],[-8.1749001,8.18628],[-8.1736071,8.184833],[-8.1721931,8.184563],[-8.1705811,8.184158],[-8.1666181,8.183816],[-8.1652501,8.183916],[-8.1648571,8.183788],[-8.1642451,8.185383],[-8.1634451,8.187653],[-8.1602791,8.18737],[-8.1594261,8.18769],[-8.1590361,8.187749],[-8.1578361,8.187634],[-8.1568261,8.187121],[-8.1557911,8.187133],[-8.1554261,8.184843],[-8.1552951,8.184387],[-8.1530581,8.184506],[-8.1528851,8.184653],[-8.1528171,8.184543],[-8.1524591,8.184721],[-8.1520841,8.184665],[-8.1515371,8.185019],[-8.1515441,8.184701],[-8.1508891,8.184862],[-8.1506741,8.185043],[-8.1502781,8.185269],[-8.1498751,8.18543],[-8.1496561,8.185839],[-8.1481921,8.186561],[-8.1477261,8.187195],[-8.1470821,8.187226],[-8.1463971,8.187923],[-8.1442931,8.189268],[-8.1437021,8.189242],[-8.1430621,8.189765],[-8.1417501,8.190404],[-8.1410951,8.190419],[-8.1305141,8.187255],[-8.1249341,8.184956],[-8.1164771,8.182134],[-8.1159581,8.181504],[-8.1146511,8.179688],[-8.1141371,8.179665],[-8.1137961,8.179956],[-8.1138301,8.18028],[-8.1140181,8.180634],[-8.1138171,8.180911],[-8.1131171,8.180831],[-8.1124611,8.181374],[-8.1116741,8.181867],[-8.1103961,8.183327],[-8.1100671,8.183548],[-8.1098991,8.183749],[-8.1092241,8.183882],[-8.1087331,8.183729],[-8.1085261,8.183498],[-8.1078201,8.18343],[-8.1067851,8.183201],[-8.1063651,8.18291],[-8.1056071,8.182788],[-8.1053701,8.182884],[-8.1049081,8.182877],[-8.1043741,8.182653],[-8.1037361,8.182115],[-8.1033471,8.182026],[-8.1026091,8.181527],[-8.1014431,8.181384],[-8.1002911,8.181936],[-8.0999191,8.181849],[-8.0992501,8.181118],[-8.0995591,8.180915],[-8.0995371,8.180643],[-8.0991531,8.180297],[-8.0985591,8.179941],[-8.0983721,8.179751],[-8.0986161,8.179464],[-8.0988771,8.179334],[-8.0988761,8.179148],[-8.0983291,8.179],[-8.0981931,8.178439],[-8.0979271,8.178301],[-8.0975621,8.178025],[-8.0969941,8.177748],[-8.0963541,8.177608],[-8.0960881,8.177466],[-8.0955501,8.177301],[-8.0954911,8.177585],[-8.0953671,8.17767],[-8.0954791,8.178305],[-8.0953681,8.178527],[-8.0951451,8.178612],[-8.0941741,8.178661],[-8.0935831,8.178741],[-8.0935151,8.178587],[-8.0937261,8.178471],[-8.0936791,8.178332],[-8.0936911,8.178205],[-8.0933561,8.178057],[-8.0930211,8.178123],[-8.0929131,8.177932],[-8.0929531,8.177673],[-8.0926841,8.177668],[-8.0925791,8.177491],[-8.0923551,8.17734],[-8.0921131,8.177296],[-8.0915981,8.17755],[-8.0911271,8.177292],[-8.0909311,8.177285],[-8.0906391,8.177435],[-8.0904011,8.177434],[-8.0900101,8.177271],[-8.0898831,8.177145],[-8.0894931,8.177279],[-8.0891851,8.177226],[-8.0889001,8.17688],[-8.0885841,8.176595],[-8.0884341,8.176046],[-8.0885781,8.175664],[-8.0886451,8.17533],[-8.0886251,8.174915],[-8.0885011,8.17474],[-8.0881581,8.174364],[-8.0879351,8.174443],[-8.0875741,8.174496],[-8.0870861,8.174398],[-8.0869231,8.174068],[-8.0865701,8.173833],[-8.0866091,8.173672],[-8.0870681,8.17339],[-8.0872151,8.173176],[-8.0873921,8.172614],[-8.0872771,8.172445],[-8.0872371,8.172255],[-8.0870341,8.172082],[-8.0865121,8.172026],[-8.0863861,8.172136],[-8.0861691,8.172187],[-8.0859971,8.172337],[-8.0855691,8.172397],[-8.0853161,8.172324],[-8.0851951,8.172098],[-8.0850571,8.172024],[-8.0848881,8.172025],[-8.0848031,8.171981],[-8.0846441,8.172028],[-8.0844821,8.172007],[-8.0837721,8.171429],[-8.0829001,8.171274],[-8.0820491,8.171018],[-8.0815891,8.170274],[-8.0812391,8.170047],[-8.0808651,8.169893],[-8.0806971,8.169702],[-8.0804691,8.169608],[-8.0802551,8.169715],[-8.0800261,8.169715],[-8.0798391,8.16985],[-8.0796641,8.169903],[-8.0792011,8.16975],[-8.0791511,8.169129],[-8.0792701,8.16853],[-8.0794211,8.168269],[-8.0794161,8.168138],[-8.0791991,8.167956],[-8.0790321,8.167403],[-8.0786741,8.167167],[-8.0785171,8.167602],[-8.0781121,8.167502],[-8.0775551,8.167174],[-8.0775131,8.166785],[-8.0773101,8.166669],[-8.0775691,8.166284],[-8.0775911,8.16607],[-8.0774021,8.16585],[-8.0773151,8.165889],[-8.0771891,8.165776],[-8.0770781,8.165433],[-8.0771721,8.165168],[-8.0773591,8.164958],[-8.0771451,8.164532],[-8.0767811,8.164431],[-8.0764891,8.163386],[-8.0761511,8.1627],[-8.0761411,8.162362],[-8.0762771,8.162334],[-8.0763851,8.162001],[-8.0763821,8.161886],[-8.0757541,8.161124],[-8.0755201,8.161319],[-8.0753031,8.161612],[-8.0746231,8.161285],[-8.0739231,8.161383],[-8.0733141,8.161243],[-8.0727051,8.161017],[-8.0716901,8.160865],[-8.0711881,8.160457],[-8.0710341,8.16009],[-8.0707471,8.159857],[-8.0703921,8.15981],[-8.0702701,8.159632],[-8.0702631,8.159292],[-8.0701981,8.159131],[-8.0697181,8.158694],[-8.0694171,8.158543],[-8.0692271,8.158628],[-8.0690551,8.158567],[-8.0686211,8.158543],[-8.0680261,8.158119],[-8.0679611,8.157846],[-8.0679911,8.157688],[-8.0678661,8.157473],[-8.0674451,8.157465],[-8.0667321,8.157572],[-8.0664631,8.157725],[-8.0662921,8.157526],[-8.0656821,8.15782],[-8.0654951,8.158203],[-8.0656251,8.158511],[-8.0655901,8.158578],[-8.0653921,8.158545],[-8.0652321,8.158743],[-8.0648821,8.158879],[-8.0645811,8.158749],[-8.0643701,8.158556],[-8.0640621,8.158585],[-8.0636761,8.158506],[-8.0634971,8.158316],[-8.0634481,8.158059],[-8.0629171,8.15817],[-8.0629371,8.157742],[-8.0630841,8.15751],[-8.0626461,8.157612],[-8.0626131,8.157452],[-8.0626381,8.157288],[-8.0625241,8.157136],[-8.0617781,8.157187],[-8.0607431,8.157656],[-8.0603611,8.15792],[-8.0601551,8.157715],[-8.0599001,8.157864],[-8.0599191,8.158325],[-8.0598171,8.158469],[-8.0596501,8.158383],[-8.0594491,8.158464],[-8.0591211,8.158819],[-8.0589941,8.158838],[-8.0585131,8.158769],[-8.0579941,8.158579],[-8.0574061,8.158605],[-8.0566031,8.158023],[-8.0562111,8.15796],[-8.0558691,8.157694],[-8.0556541,8.157416],[-8.0552471,8.157384],[-8.0549591,8.157154],[-8.0547221,8.157051],[-8.0544961,8.156844],[-8.0542301,8.156722],[-8.0539991,8.156549],[-8.0535271,8.156152],[-8.0533591,8.155472],[-8.0532191,8.155182],[-8.0526921,8.154895],[-8.0524711,8.154901],[-8.0523951,8.154956],[-8.0522001,8.154939],[-8.0518641,8.154799],[-8.0514971,8.154888],[-8.0516331,8.155265],[-8.0515141,8.155624],[-8.0519031,8.155586],[-8.0521441,8.15579],[-8.0521881,8.156789],[-8.0525211,8.157972],[-8.0525601,8.160641],[-8.0518951,8.161253],[-8.0468541,8.163789],[-8.0467631,8.164555],[-8.0464211,8.164775],[-8.0456941,8.164475],[-8.0454521,8.164653],[-8.0446431,8.166216],[-8.0446421,8.166737],[-8.0441781,8.16807],[-8.0436991,8.168604],[-8.0431981,8.169057],[-8.0430661,8.169724],[-8.0433191,8.170008],[-8.0435611,8.170397],[-8.0436291,8.17071],[-8.0445141,8.171277],[-8.0445851,8.171348],[-8.0446841,8.17159],[-8.0450641,8.171522],[-8.0451951,8.171594],[-8.0448001,8.172287],[-8.0449341,8.172587],[-8.0448551,8.172855],[-8.0448391,8.173337],[-8.0450491,8.174346],[-8.0441061,8.175514],[-8.0437411,8.176117],[-8.0436561,8.176836],[-8.0435011,8.177097],[-8.0426571,8.178121],[-8.0423751,8.178594],[-8.0420451,8.180446],[-8.0417521,8.180921],[-8.0413891,8.181822],[-8.0407291,8.182353],[-8.0398311,8.183331],[-8.0390671,8.18338],[-8.0366901,8.181907],[-8.0352761,8.18116],[-8.0335231,8.180477],[-8.0327981,8.181444],[-8.0334231,8.18245],[-8.0335431,8.182999],[-8.0333001,8.183831],[-8.0343101,8.185121],[-8.0336781,8.186111],[-8.0338761,8.186969],[-8.0339981,8.188255],[-8.0344111,8.19021],[-8.0346651,8.190258],[-8.0349881,8.192098],[-8.0354641,8.192998],[-8.0346911,8.19463],[-8.0304111,8.194231],[-8.0279111,8.194128],[-8.0247521,8.193317],[-8.0254221,8.19192],[-8.0256221,8.191614],[-8.0257921,8.191496],[-8.0258651,8.191393],[-8.0258921,8.191254],[-8.0260591,8.190977],[-8.0258521,8.190833],[-8.0253021,8.190863],[-8.0250271,8.190822],[-8.0250021,8.190343],[-8.0248971,8.189885],[-8.0248961,8.189631],[-8.0247631,8.189456],[-8.0246191,8.189359],[-8.0243851,8.189285],[-8.0242411,8.189047],[-8.0242281,8.188823],[-8.0237011,8.187822],[-8.0222781,8.186188],[-8.0213821,8.184581],[-8.0209741,8.183527],[-8.0204071,8.18304],[-8.0201701,8.182328],[-8.0198671,8.181959],[-8.0198801,8.181195],[-8.0195641,8.179825],[-8.0185001,8.180265],[-8.0175031,8.180564],[-8.0165721,8.181116],[-8.0140751,8.185039],[-8.0134771,8.186285],[-8.0131471,8.187179],[-8.0128131,8.187608],[-8.0121001,8.18756],[-8.0108861,8.187322],[-8.0104821,8.187036],[-8.0098871,8.186989],[-8.0092851,8.187474],[-8.0087761,8.188205],[-8.0085571,8.188291],[-8.0081921,8.188553],[-8.0081871,8.188768],[-8.0079251,8.188976],[-8.0075611,8.189686],[-8.0071131,8.18986],[-8.0069921,8.189991],[-8.0067511,8.189937],[-8.0061481,8.190483],[-8.0059491,8.190742],[-8.0057171,8.190816],[-8.0057001,8.191054],[-8.0055781,8.191104],[-8.0051521,8.190852],[-8.0044301,8.190603],[-8.0042221,8.190757],[-8.0037711,8.190838],[-8.0031151,8.190941],[-8.0027601,8.190886],[-8.0023381,8.191211],[-8.0025051,8.191466],[-8.0020221,8.191739],[-8.0018201,8.191671],[-8.0013341,8.191782],[-8.0010891,8.192004],[-8.0009141,8.19227],[-8.0006531,8.19298],[-8.0002251,8.193786],[-7.9995881,8.193817],[-7.9993331,8.194364],[-7.9992091,8.195221],[-7.9982101,8.196048],[-7.9975891,8.197073],[-7.9973431,8.197805],[-7.9968321,8.197903],[-7.9966391,8.197991],[-7.9964131,8.198269],[-7.9961711,8.19836],[-7.9957991,8.198254],[-7.9956264,8.1982909],[-7.9945691,8.198517],[-7.9940521,8.198397],[-7.9928131,8.197679],[-7.9920501,8.197299],[-7.9917971,8.196845],[-7.9912451,8.196874],[-7.9904161,8.197019],[-7.9889591,8.196876],[-7.9872451,8.197315],[-7.9868841,8.196881],[-7.9865031,8.196],[-7.9859151,8.195441],[-7.9851881,8.195373],[-7.9848171,8.195393],[-7.9846971,8.195046],[-7.9840451,8.194455],[-7.9837811,8.194049],[-7.9836941,8.193524],[-7.9832511,8.193148],[-7.9810261,8.19283],[-7.9821101,8.191138],[-7.9823741,8.190587],[-7.9825181,8.189265],[-7.9826731,8.188673],[-7.9835121,8.18803],[-7.9839511,8.187144],[-7.9836081,8.185987],[-7.9835061,8.185432],[-7.9851911,8.184579],[-7.9872031,8.184988],[-7.9876091,8.184364],[-7.9877151,8.183917],[-7.9876981,8.183101],[-7.9878891,8.183013],[-7.9883511,8.182491],[-7.9893001,8.181998],[-7.9907351,8.180565],[-7.9904901,8.180064],[-7.9904961,8.179615],[-7.9909251,8.179611],[-7.9911711,8.179493],[-7.9913111,8.179359],[-7.9913091,8.179135],[-7.9912401,8.179089],[-7.9907011,8.179149],[-7.9906671,8.178772],[-7.9903971,8.17829],[-7.9902571,8.177632],[-7.9902401,8.177014],[-7.9903491,8.176443],[-7.9914681,8.177167],[-7.9922181,8.177121],[-7.9922711,8.176896],[-7.9922271,8.176735],[-7.9922981,8.176519],[-7.9925621,8.176368],[-7.9927731,8.176328],[-7.9928341,8.176189],[-7.9931981,8.175926],[-7.9932431,8.175778],[-7.9931581,8.174784],[-7.9936481,8.173708],[-7.9937641,8.173167],[-7.9937481,8.172962],[-7.9936751,8.17267],[-7.9935481,8.172601],[-7.9930341,8.171825],[-7.9928651,8.171485],[-7.9926071,8.170434],[-7.9925591,8.169735],[-7.9926801,8.169267],[-7.9937621,8.168591],[-7.9941991,8.167753],[-7.9943401,8.167651],[-7.9944251,8.167269],[-7.9944731,8.166194],[-7.9950711,8.165576],[-7.9942321,8.164799],[-7.9942851,8.164444],[-7.9947261,8.163988],[-7.9951021,8.163319],[-7.9951331,8.162901],[-7.9953111,8.162691],[-7.9957051,8.162565],[-7.9959561,8.162367],[-7.9960191,8.162201],[-7.9959641,8.162005],[-7.9953671,8.161179],[-7.9954831,8.160793],[-7.9961661,8.16008],[-7.9962661,8.15986],[-7.9963951,8.159488],[-7.9962481,8.15896],[-7.9963501,8.158914],[-7.9966891,8.159094],[-7.9968591,8.158929],[-7.9969891,8.158668],[-7.9969851,8.158501],[-7.9972471,8.158184],[-7.9972931,8.1579],[-7.9971821,8.157655],[-7.9972971,8.157517],[-7.9972801,8.157437],[-7.9971681,8.157352],[-7.9971741,8.157229],[-7.9973141,8.157028],[-7.9973211,8.156694],[-7.9976331,8.156284],[-7.9976591,8.156027],[-7.9975721,8.155535],[-7.9972241,8.155358],[-7.9965801,8.154768],[-7.9962871,8.154759],[-7.9959941,8.154645],[-7.9959001,8.15425],[-7.9955021,8.15418],[-7.9951041,8.153985],[-7.9946571,8.153931],[-7.9946021,8.153376],[-7.9942461,8.152867],[-7.9943221,8.152031],[-7.9944391,8.151686],[-7.9946291,8.151434],[-7.9948251,8.151233],[-7.9953561,8.151301],[-7.9960951,8.150526],[-7.9965281,8.150185],[-7.9965651,8.150051],[-7.9966481,8.150021],[-7.9965901,8.149952],[-7.9966011,8.149786],[-7.9970571,8.149348],[-7.9970971,8.14916],[-7.9970771,8.148634],[-7.9969131,8.148392],[-7.9961721,8.148209],[-7.9958931,8.147605],[-7.9963171,8.147307],[-7.9963501,8.146935],[-7.9964651,8.146637],[-7.9962961,8.146548],[-7.9965841,8.146115],[-7.9972611,8.14479],[-7.9971501,8.144597],[-7.9966271,8.144174],[-7.9960101,8.143752],[-7.9959151,8.143571],[-7.9961011,8.14312],[-7.9963921,8.142701],[-7.9959791,8.142407],[-7.9958481,8.142143],[-7.9958191,8.141887],[-7.9961991,8.141427],[-7.9963151,8.140545],[-7.9959891,8.139884],[-7.9965141,8.138677],[-7.9966221,8.138309],[-7.9966751,8.137974],[-7.9965541,8.13775],[-7.9965411,8.137386],[-7.9967171,8.136732],[-7.9967111,8.13595],[-7.9965411,8.13542],[-7.9962091,8.135175],[-7.9959071,8.135087],[-7.9952761,8.134801],[-7.9951811,8.134467],[-7.9953431,8.133801],[-7.9950771,8.133733],[-7.9947981,8.133563],[-7.9946981,8.133113],[-7.9944721,8.132422],[-7.9940411,8.131821],[-7.9935971,8.131358],[-7.9930641,8.131062],[-7.9927411,8.130818],[-7.9929841,8.130009],[-7.9932591,8.129708],[-7.9934901,8.129608],[-7.9937511,8.129348],[-7.9938141,8.128765],[-7.9936371,8.128391],[-7.9926841,8.128068],[-7.9926541,8.127782],[-7.9930321,8.127554],[-7.9932741,8.127231],[-7.9933021,8.126706],[-7.9933831,8.126388],[-7.9936771,8.125997],[-7.9937971,8.125913],[-7.9938861,8.125695],[-7.9939111,8.125491],[-7.9940651,8.125339],[-7.9940551,8.12516],[-7.9943031,8.125111],[-7.9951501,8.124225],[-7.9953621,8.124083],[-7.9958681,8.123892],[-7.9961451,8.123912],[-7.9964321,8.124219],[-7.9968091,8.124298],[-7.9972321,8.124242],[-7.9976351,8.123842],[-7.9977461,8.123678],[-7.9977371,8.1235],[-7.9975021,8.123304],[-7.9975431,8.123055],[-7.9977561,8.122824],[-7.9979361,8.122705],[-7.9981331,8.122428],[-7.9982431,8.122123],[-7.9985171,8.121724],[-7.9987841,8.121581],[-7.9994181,8.121568],[-7.9995501,8.12125],[-7.9999191,8.121051],[-8.0003561,8.120974],[-8.0006991,8.121321],[-8.0010761,8.12138],[-8.0013331,8.121185],[-8.0020331,8.121225],[-8.0027921,8.12117],[-8.0029301,8.121212],[-8.0031951,8.122169],[-8.0038431,8.122216],[-8.0043051,8.122334],[-8.0048201,8.122163],[-8.0057191,8.121212],[-8.0067881,8.120987],[-8.0076211,8.120313],[-8.0081761,8.119587],[-8.0082551,8.118966],[-8.0082681,8.118411],[-8.0084921,8.117936],[-8.0089811,8.117157],[-8.0093241,8.116398],[-8.0097901,8.115556],[-8.0101521,8.114577],[-8.0100291,8.113749],[-8.0102841,8.112024],[-8.0106961,8.111494],[-8.0108831,8.110899],[-8.0119481,8.109991],[-8.0125741,8.109365],[-8.0129501,8.108301],[-8.0128251,8.107706],[-8.0122611,8.106641],[-8.0120731,8.10589],[-8.0121051,8.10445],[-8.0129501,8.103135],[-8.0129811,8.102008],[-8.0123861,8.101037],[-8.0119811,8.10145],[-8.0110711,8.101162],[-8.0096541,8.101268],[-8.0077541,8.099265],[-8.0073341,8.098895],[-8.0072571,8.097768],[-8.0071571,8.097033],[-8.0067771,8.096057],[-8.0060621,8.096215],[-8.0045591,8.096434],[-8.0034161,8.096685],[-8.0024621,8.095811],[-8.0017431,8.095274],[-8.0015371,8.09485],[-8.0011901,8.095009],[-7.9978741,8.097943],[-7.9978401,8.098253],[-7.9975021,8.098629],[-7.9968351,8.098847],[-7.9965411,8.098628],[-7.9961551,8.098123],[-7.9960041,8.097821],[-7.9953461,8.098071],[-7.9952231,8.098584],[-7.9949851,8.098731],[-7.9947581,8.09852],[-7.9946831,8.098317],[-7.9945011,8.09809],[-7.9942061,8.097899],[-7.9938511,8.098135],[-7.9934051,8.098127],[-7.9930321,8.096565],[-7.9929041,8.096444],[-7.9928061,8.096137],[-7.9923101,8.095872],[-7.9924611,8.095458],[-7.9923991,8.095308],[-7.9915981,8.094891],[-7.9909101,8.09478],[-7.9903681,8.094866],[-7.9892231,8.094889],[-7.9885901,8.094993],[-7.9878951,8.094841],[-7.9876331,8.094441],[-7.9877601,8.093935],[-7.9878011,8.093436],[-7.9878321,8.092747],[-7.9877471,8.092302],[-7.9870951,8.091329],[-7.9855251,8.090446],[-7.9846301,8.090415],[-7.9839511,8.090207],[-7.9835761,8.090146],[-7.9830411,8.090388],[-7.9827601,8.090851],[-7.9820521,8.090971],[-7.9816621,8.09027],[-7.9809631,8.089917],[-7.9803821,8.089935],[-7.9799611,8.090175],[-7.9795621,8.090168],[-7.9792281,8.089997],[-7.9789051,8.089751],[-7.9788511,8.089502],[-7.9786381,8.089402],[-7.9783691,8.08954],[-7.9779091,8.089937],[-7.9774631,8.090008],[-7.9772861,8.089773],[-7.9766651,8.090011],[-7.9756621,8.090208],[-7.9754791,8.089495],[-7.9755671,8.088985],[-7.9756901,8.088648],[-7.9759241,8.08835],[-7.9758301,8.088041],[-7.9751351,8.087775],[-7.9740811,8.087926],[-7.9740061,8.087792],[-7.9743661,8.087267],[-7.9743801,8.087071],[-7.9746121,8.086641],[-7.9745591,8.086064],[-7.9744831,8.085962],[-7.9739331,8.085976],[-7.9739551,8.084962],[-7.9740041,8.084732],[-7.9752981,8.084326],[-7.9754281,8.084198],[-7.9752681,8.083881],[-7.9752641,8.083713],[-7.9753811,8.083487],[-7.9752561,8.083339],[-7.9736461,8.084044],[-7.9731031,8.083773],[-7.9732301,8.083678],[-7.9734851,8.083592],[-7.9734871,8.082534],[-7.9733671,8.082282],[-7.9729871,8.081761],[-7.9727761,8.081742],[-7.9719851,8.0818],[-7.9716151,8.081571],[-7.9715971,8.081233],[-7.9718331,8.080821],[-7.9717321,8.079941],[-7.9715551,8.079762],[-7.9709681,8.079502],[-7.9703241,8.078824],[-7.9705691,8.07717],[-7.9726461,8.077228],[-7.9726851,8.076623],[-7.9727541,8.075269],[-7.9722451,8.074654],[-7.9722961,8.073583],[-7.9718781,8.073145],[-7.9710461,8.072575],[-7.9708221,8.072614],[-7.9706781,8.072705],[-7.9705891,8.072418],[-7.9706481,8.07221],[-7.9705991,8.071972],[-7.9706681,8.071754],[-7.9710341,8.071279],[-7.9710201,8.071029],[-7.9711781,8.070725],[-7.9709671,8.070607],[-7.9707951,8.070593],[-7.9707551,8.070356],[-7.9708741,8.070197],[-7.9708351,8.069946],[-7.9706631,8.06984],[-7.9705041,8.069986],[-7.9702931,8.069893],[-7.9695061,8.069892],[-7.9692491,8.069665],[-7.9689051,8.069552],[-7.9680231,8.069474],[-7.9678871,8.069074],[-7.9684291,8.068586],[-7.9686331,8.068153],[-7.9686531,8.067978],[-7.9684781,8.067664],[-7.9679271,8.06695],[-7.9677851,8.066673],[-7.9673131,8.066208],[-7.9669801,8.065943],[-7.9667901,8.065989],[-7.9646941,8.069086],[-7.9644621,8.068485],[-7.9637071,8.067511],[-7.9642301,8.067164],[-7.9652731,8.064897],[-7.9651161,8.064315],[-7.9647531,8.063539],[-7.9640531,8.063172],[-7.9646551,8.062069],[-7.9645651,8.06157],[-7.9646141,8.061263],[-7.9648431,8.061042],[-7.9649191,8.060787],[-7.9647511,8.060404],[-7.9647771,8.0599],[-7.9647251,8.059593],[-7.9643941,8.059451],[-7.9634831,8.058551],[-7.9625651,8.058417],[-7.9622401,8.057622],[-7.9624541,8.05734],[-7.9623631,8.057205],[-7.9621381,8.057143],[-7.9618201,8.057173],[-7.9615681,8.057148],[-7.9615591,8.056865],[-7.9616251,8.0565],[-7.9619771,8.056199],[-7.9619881,8.055837],[-7.9619751,8.055344],[-7.9617811,8.054874],[-7.9615671,8.054518],[-7.9617001,8.054314],[-7.9622061,8.053761],[-7.9622571,8.053604],[-7.9620681,8.053279],[-7.9616431,8.053457],[-7.9612011,8.053399],[-7.9609491,8.053242],[-7.9607791,8.053207],[-7.9604551,8.052856],[-7.9603711,8.052954],[-7.9602151,8.05293],[-7.9598301,8.052556],[-7.9595041,8.052412],[-7.9593591,8.052195],[-7.9595181,8.051978],[-7.9595051,8.051786],[-7.9593491,8.051582],[-7.9593851,8.051401],[-7.9592771,8.051173],[-7.9589881,8.050968],[-7.9583871,8.050884],[-7.9580511,8.051004],[-7.9579051,8.050967],[-7.9578221,8.051233],[-7.9576781,8.051149],[-7.9571581,8.051208],[-7.9571831,8.051413],[-7.9569551,8.05175],[-7.9567051,8.052075],[-7.9559461,8.052808],[-7.9559951,8.053217],[-7.9558621,8.053361],[-7.9557421,8.053998],[-7.9555141,8.054143],[-7.9548521,8.054431],[-7.9545831,8.054458],[-7.9543461,8.054419],[-7.9541531,8.054312],[-7.9541401,8.053684],[-7.9545281,8.053746],[-7.9546481,8.05371],[-7.9546831,8.053565],[-7.9546231,8.053434],[-7.9545401,8.053435],[-7.9542871,8.053265],[-7.9540951,8.053373],[-7.9539751,8.053337],[-7.9538421,8.053193],[-7.9535281,8.053521],[-7.9533481,8.053375],[-7.9533121,8.05317],[-7.9528011,8.052917],[-7.9527791,8.05276],[-7.9531201,8.052653],[-7.9530841,8.052546],[-7.9528691,8.052305],[-7.9524001,8.052208],[-7.9522181,8.052125],[-7.9519771,8.052199],[-7.9517341,8.051945],[-7.9518081,8.051583],[-7.9517381,8.051437],[-7.9515161,8.051571],[-7.9515731,8.052388],[-7.9513191,8.052435],[-7.9510801,8.052221],[-7.9512211,8.051752],[-7.9512451,8.051377],[-7.9510141,8.051499],[-7.9508511,8.051824],[-7.9504331,8.051732],[-7.9504141,8.051897],[-7.9502401,8.052035],[-7.9498721,8.051684],[-7.9497411,8.051799],[-7.9495931,8.051766],[-7.9492161,8.051782],[-7.9490841,8.051897],[-7.9490231,8.05185],[-7.9488471,8.051917],[-7.9487501,8.051837],[-7.9487481,8.051679],[-7.9485261,8.051113],[-7.9486301,8.050837],[-7.9483901,8.050764],[-7.9484471,8.050152],[-7.9483461,8.050207],[-7.9479691,8.05024],[-7.9473651,8.05042],[-7.9469561,8.050079],[-7.9470431,8.050086],[-7.9468711,8.049752],[-7.9462581,8.049393],[-7.9459031,8.049315],[-7.9453601,8.049108],[-7.9444771,8.04922],[-7.9440951,8.049117],[-7.9436171,8.048829],[-7.9435241,8.048513],[-7.9438221,8.048503],[-7.9440311,8.048402],[-7.9441551,8.048183],[-7.9441161,8.04797],[-7.9437201,8.047786],[-7.9438091,8.047418],[-7.9438661,8.046433],[-7.9442801,8.045098],[-7.9446551,8.044366],[-7.9450811,8.043742],[-7.9472301,8.042676],[-7.9476901,8.042184],[-7.9481001,8.041954],[-7.9485271,8.041888],[-7.9484901,8.041501],[-7.9487131,8.040949],[-7.9487681,8.040682],[-7.9489041,8.040477],[-7.9489771,8.039977],[-7.9489791,8.039614],[-7.9488431,8.03919],[-7.9490031,8.038996],[-7.9492491,8.038902],[-7.9495141,8.038371],[-7.9493551,8.038031],[-7.9495341,8.037891],[-7.9494311,8.03772],[-7.9489081,8.037656],[-7.9485391,8.037461],[-7.9485621,8.037262],[-7.9487501,8.036859],[-7.9486641,8.036709],[-7.9485181,8.036674],[-7.9480991,8.037026],[-7.9481901,8.037343],[-7.9478511,8.037242],[-7.9477911,8.036976],[-7.9473701,8.0369],[-7.9472721,8.037151],[-7.9471201,8.037204],[-7.9469701,8.037015],[-7.9468481,8.036725],[-7.9469661,8.036355],[-7.9470331,8.036393],[-7.9472981,8.035847],[-7.9476511,8.035836],[-7.9477331,8.036042],[-7.9480251,8.035897],[-7.9482001,8.035576],[-7.9477051,8.035164],[-7.9476021,8.034836],[-7.9478411,8.034789],[-7.9482121,8.034865],[-7.9484301,8.034848],[-7.9484941,8.034403],[-7.9486391,8.034329],[-7.9489881,8.034255],[-7.9488911,8.033758],[-7.9490631,8.033463],[-7.9497171,8.033437],[-7.9498851,8.033291],[-7.9500231,8.033083],[-7.9500511,8.032826],[-7.9500171,8.03267],[-7.9496551,8.032202],[-7.9489991,8.031878],[-7.9490241,8.031709],[-7.9493541,8.031731],[-7.9496851,8.031427],[-7.9494251,8.031171],[-7.9491511,8.030992],[-7.9482301,8.031249],[-7.9480581,8.031164],[-7.9480071,8.030989],[-7.9481391,8.030284],[-7.9483771,8.030003],[-7.9483901,8.029204],[-7.9481821,8.029146],[-7.9479051,8.02939],[-7.9476621,8.029282],[-7.9475551,8.028975],[-7.9475261,8.028589],[-7.9465131,8.028043],[-7.9465241,8.0275],[-7.9467731,8.025801],[-7.9473141,8.025211],[-7.9473241,8.024882],[-7.9471801,8.024703],[-7.9468661,8.024549],[-7.9464751,8.024541],[-7.9462501,8.024351],[-7.9460921,8.023679],[-7.9458761,8.023329],[-7.9446161,8.022742],[-7.9441721,8.02262],[-7.9441699,8.0221179],[-7.9446021,8.022203],[-7.9451033,8.0219069],[-7.945215,8.0212209],[-7.9449785,8.0198495],[-7.9430153,8.017109],[-7.9453732,8.0134291],[-7.9456247,8.0125362],[-7.9460573,8.0119387],[-7.9469866,8.0116529],[-7.9478019,8.0120583],[-7.9492781,8.0132609],[-7.9499692,8.0138589],[-7.9505329,8.0148091],[-7.9507946,8.0150815],[-7.9517541,8.0154536],[-7.9528009,8.0161247],[-7.953284,8.0161978],[-7.9538342,8.0160184],[-7.9548206,8.016138],[-7.9553708,8.0165632],[-7.9566256,8.0184569],[-7.9571489,8.0196529],[-7.9573234,8.0207293],[-7.957679,8.0211678],[-7.9582628,8.0212874],[-7.9587929,8.0210947],[-7.9595243,8.0200382],[-7.9603026,8.019706],[-7.9614635,8.0196994],[-7.9625773,8.0198123],[-7.964181,8.0203771],[-7.9655834,8.0210681],[-7.9666973,8.0219518],[-7.9675696,8.0227491],[-7.9682272,8.0237059],[-7.968925,8.0240249],[-7.9696161,8.0240182],[-7.9718103,8.0231345],[-7.9729711,8.0222774],[-7.9746822,8.0207492],[-7.9759437,8.0196794],[-7.9774669,8.018716],[-7.9783459,8.0183572],[-7.9789296,8.0179453],[-7.9794731,8.0173539],[-7.9802582,8.0170084],[-7.9808151,8.0170615],[-7.9812043,8.0174004],[-7.9818082,8.0187957],[-7.9819357,8.0194402],[-7.9825061,8.0201113],[-7.9826134,8.0206894],[-7.9824524,8.0217591],[-7.9818947,8.0229291],[-7.9818518,8.0231877],[-7.981932,8.0236127],[-7.9825564,8.0245764],[-7.9831335,8.024882],[-7.983979,8.0249618],[-7.9847439,8.0248488],[-7.9854552,8.0245432],[-7.9858511,8.0240382],[-7.9864081,8.023779],[-7.9869717,8.0238721],[-7.9874146,8.024005],[-7.9876226,8.0242707],[-7.9879044,8.0250216],[-7.9883809,8.0260847],[-7.9887231,8.0268621],[-7.9887566,8.0272408],[-7.9885351,8.027762],[-7.9879491,8.028236],[-7.9873181,8.028779],[-7.9868811,8.029449],[-7.9864041,8.030056],[-7.9852471,8.031062],[-7.9842671,8.032894],[-7.9842201,8.03366],[-7.9841311,8.033866],[-7.9831041,8.034507],[-7.9822711,8.034833],[-7.9822011,8.034998],[-7.9823731,8.035285],[-7.9828011,8.035726],[-7.9827351,8.036139],[-7.9828871,8.036321],[-7.9832041,8.036394],[-7.9835361,8.036567],[-7.9836891,8.036768],[-7.9838911,8.037936],[-7.9842561,8.038156],[-7.9849001,8.038318],[-7.9852571,8.038551],[-7.9862891,8.039433],[-7.9879511,8.040367],[-7.9888251,8.041342],[-7.9890881,8.041989],[-7.9899391,8.042639],[-7.9912601,8.043399],[-7.9920011,8.04326],[-7.9926181,8.042882],[-7.9938181,8.042744],[-7.9941451,8.04296],[-7.9945251,8.043403],[-7.9947501,8.044007],[-7.9947301,8.044864],[-7.9947871,8.045734],[-7.9944731,8.046783],[-7.9946231,8.047124],[-7.9950831,8.047746],[-7.9956701,8.048232],[-7.9966971,8.04856],[-7.9978231,8.048231],[-7.9982741,8.047828],[-7.9984251,8.046219],[-7.9989081,8.045116],[-7.9994151,8.044164],[-8.0006781,8.042983],[-8.0010131,8.042812],[-8.0024581,8.042607],[-8.0031691,8.042461],[-8.0035501,8.042749],[-8.0042081,8.043793],[-8.0046011,8.044108],[-8.0051451,8.04423],[-8.0057281,8.044185],[-8.0062191,8.04402],[-8.0066711,8.043692],[-8.0070671,8.043673],[-8.0075741,8.043931],[-8.0079571,8.044196],[-8.0083931,8.044205],[-8.0089731,8.044048],[-8.0097531,8.043486],[-8.0100941,8.042929],[-8.0103531,8.042105],[-8.0102291,8.041283],[-8.0098621,8.040224],[-8.0096941,8.03953],[-8.0096751,8.038931],[-8.0097881,8.037651],[-8.0094771,8.037265],[-8.0077271,8.036439],[-8.0066161,8.036408],[-8.0061201,8.036046],[-8.0061061,8.035403],[-8.0066401,8.034776],[-8.0075581,8.034214],[-8.0095891,8.033743],[-8.0117561,8.034231],[-8.0122531,8.03459],[-8.0125191,8.03516],[-8.0125351,8.035797],[-8.0128191,8.036333],[-8.0135851,8.036637],[-8.0150041,8.037105],[-8.0156171,8.037022],[-8.0163061,8.036704],[-8.0169841,8.036581],[-8.0186041,8.036471],[-8.0202821,8.036506],[-8.0209311,8.036327],[-8.0212131,8.03596],[-8.0215011,8.035479],[-8.0217831,8.035285],[-8.0222821,8.035187],[-8.0231401,8.035292],[-8.0234451,8.035232],[-8.0237711,8.035285],[-8.0240521,8.035392],[-8.0244101,8.03643],[-8.0249761,8.036874],[-8.0260161,8.037208],[-8.0266741,8.037102],[-8.0270751,8.037114],[-8.0273001,8.037416],[-8.0276251,8.038284],[-8.0282371,8.038925],[-8.0294431,8.039401],[-8.0310511,8.039689],[-8.0320181,8.039808],[-8.0328081,8.039485],[-8.0332841,8.038961],[-8.0333551,8.038319],[-8.0335001,8.037896],[-8.0337301,8.037767],[-8.0341961,8.037783],[-8.0346821,8.038175],[-8.0356851,8.039358],[-8.0371851,8.040617],[-8.0384031,8.041311],[-8.0388291,8.041321],[-8.0390861,8.04128],[-8.0392891,8.041439],[-8.0398591,8.04238],[-8.0400371,8.042925],[-8.0400181,8.043744],[-8.0402321,8.044571],[-8.0406891,8.04526],[-8.0412201,8.045613],[-8.0425871,8.045802],[-8.0437621,8.046026],[-8.0451101,8.046107],[-8.0458171,8.046047],[-8.0464661,8.04607],[-8.0469331,8.046171],[-8.0476351,8.046488],[-8.0486201,8.046533],[-8.0502241,8.046181],[-8.0508551,8.045754],[-8.0514031,8.045209],[-8.0517271,8.045005],[-8.0520231,8.044709],[-8.0519761,8.044385],[-8.0521611,8.044096],[-8.0530191,8.043697],[-8.0535131,8.043178],[-8.0538051,8.042651],[-8.0539621,8.04159],[-8.0539841,8.041157],[-8.0546401,8.040294],[-8.0557381,8.039688],[-8.0579781,8.03905],[-8.0590831,8.039022],[-8.0604321,8.039234],[-8.0607031,8.039321],[-8.0608231,8.038665],[-8.0610371,8.038169],[-8.0613851,8.037902],[-8.0618261,8.037447],[-8.0621471,8.036965],[-8.0622681,8.036496],[-8.0620941,8.035546],[-8.0618931,8.035104],[-8.0616251,8.034756],[-8.0616251,8.034301],[-8.0619871,8.033886],[-8.0621881,8.033472],[-8.0621881,8.033137],[-8.0624151,8.032709],[-8.0626561,8.032441],[-8.0628301,8.031932],[-8.0627231,8.031624],[-8.0623081,8.031236],[-8.0620811,8.030808],[-8.0621611,8.03046],[-8.0625101,8.030257],[-8.0626701,8.030364],[-8.0628571,8.030337],[-8.0629781,8.030043],[-8.0628571,8.029534],[-8.0628571,8.028972],[-8.0627771,8.028718],[-8.0629651,8.028477],[-8.0631391,8.02845],[-8.0633121,8.028664],[-8.0635541,8.028731],[-8.0639371,8.028447],[-8.0647991,8.028414],[-8.0653001,8.028744],[-8.0658551,8.028905],[-8.0661371,8.028758],[-8.0661641,8.028423],[-8.0659361,8.028048],[-8.0661101,8.027834],[-8.0662441,8.027419],[-8.0662711,8.027085],[-8.0664851,8.026924],[-8.0665921,8.02671],[-8.0665921,8.026456],[-8.0668731,8.026295],[-8.0672481,8.026201],[-8.0675551,8.026001],[-8.0675961,8.025733],[-8.0674481,8.025639],[-8.0672211,8.025586],[-8.0670871,8.025465],[-8.0672341,8.02505],[-8.0666591,8.023872],[-8.0664441,8.023658],[-8.0666071,8.023219],[-8.0672781,8.022785],[-8.0678201,8.021901],[-8.0678231,8.021423],[-8.0677681,8.02099],[-8.0679921,8.020328],[-8.0675251,8.019598],[-8.0678981,8.019419],[-8.0679421,8.018593],[-8.0678111,8.018506],[-8.0673871,8.018617],[-8.0672631,8.018551],[-8.0671461,8.018287],[-8.0673001,8.017989],[-8.0666081,8.016829],[-8.0667951,8.016306],[-8.0671691,8.016137],[-8.0668701,8.015146],[-8.0669261,8.014641],[-8.0667581,8.014117],[-8.0669641,8.013836],[-8.0670381,8.013406],[-8.0664401,8.012545],[-8.0665701,8.011909],[-8.0670381,8.011423],[-8.0671151,8.010126],[-8.0668991,8.009169],[-8.0672051,8.008002],[-8.0668961,8.007474],[-8.0670811,8.005739],[-8.0676291,8.004862],[-8.0678321,8.004013],[-8.0680131,8.003679],[-8.0679361,8.003073],[-8.0677701,8.002698],[-8.0682761,8.001806],[-8.0691541,8.001475],[-8.0695051,8.001494],[-8.0702791,8.000724],[-8.0751321,8.000393],[-8.0755421,8.000537],[-8.0756991,8.000688],[-8.0764601,8.001149],[-8.0770081,8.001119],[-8.0774231,8.000716],[-8.0780531,8.000437],[-8.0784901,7.999493],[-8.0786391,7.998842],[-8.0783631,7.998569],[-8.0786551,7.998176],[-8.0789841,7.997922],[-8.0791871,7.997624],[-8.0788821,7.997414],[-8.0789371,7.997238],[-8.0791191,7.997228],[-8.0797501,7.996982],[-8.0797747,7.9969668],[-8.0800741,7.996781],[-8.0804441,7.996689],[-8.0805521,7.996427],[-8.0805211,7.995995],[-8.0807361,7.99561],[-8.0809681,7.995425],[-8.0809831,7.995132],[-8.0808601,7.994593],[-8.0810291,7.994316],[-8.0802861,7.993415],[-8.0802061,7.992556],[-8.0806861,7.992096],[-8.0807361,7.991394],[-8.0804901,7.990771],[-8.0805361,7.98893],[-8.0812031,7.98842],[-8.0821261,7.987488],[-8.0825061,7.987305],[-8.0827351,7.986913],[-8.0828501,7.986865],[-8.0829221,7.986744],[-8.0829571,7.986387],[-8.0830621,7.986275],[-8.0830931,7.98616],[-8.0830641,7.985924],[-8.0831961,7.985862],[-8.0832191,7.985798],[-8.0833221,7.985826],[-8.0834761,7.985777],[-8.0840321,7.985471],[-8.0841421,7.985296],[-8.0840061,7.98478],[-8.0840501,7.984407],[-8.0841921,7.984164],[-8.0845791,7.983873],[-8.0851491,7.983884],[-8.0853931,7.983509],[-8.0856571,7.982945],[-8.0852991,7.982583],[-8.0852981,7.982336],[-8.0857231,7.982082],[-8.0857391,7.981346],[-8.0860971,7.980953],[-8.0864671,7.980891],[-8.0866521,7.98048],[-8.0870211,7.980028],[-8.0873091,7.979535],[-8.0877401,7.979083],[-8.0882741,7.979062],[-8.0885621,7.978939],[-8.0888091,7.978631],[-8.0892801,7.978434],[-8.0895991,7.977999],[-8.0907281,7.977499],[-8.0912841,7.976572],[-8.0917711,7.973428],[-8.0921041,7.97251],[-8.0926571,7.971442],[-8.0927491,7.970615],[-8.0926271,7.969831],[-8.0928141,7.969267],[-8.0932741,7.968468],[-8.0932881,7.96758],[-8.0938301,7.966043],[-8.0947731,7.965193],[-8.0940571,7.964025],[-8.0937351,7.963222],[-8.0934031,7.961622],[-8.0933541,7.961176],[-8.0933671,7.959777],[-8.0934321,7.959154],[-8.0930121,7.958123],[-8.0925501,7.957768],[-8.0926781,7.956983],[-8.0930941,7.955485],[-8.0937561,7.953722],[-8.0938319,7.9525562],[-8.0938521,7.952246],[-8.0944511,7.951176],[-8.0948791,7.950147],[-8.0954251,7.949521],[-8.0964171,7.948669],[-8.0972371,7.948155],[-8.0988851,7.947558],[-8.0994601,7.946103],[-8.0996351,7.945993],[-8.0999721,7.945017],[-8.1003051,7.944533],[-8.1009741,7.944158],[-8.1045601,7.9414],[-8.1047871,7.940943],[-8.1059971,7.93995],[-8.1065841,7.93769],[-8.1059771,7.935986],[-8.1059971,7.935598],[-8.1059101,7.935302],[-8.1058601,7.934793],[-8.1059631,7.934311],[-8.1063501,7.933929],[-8.1065191,7.933304],[-8.1065741,7.932894],[-8.1067831,7.932689],[-8.1070391,7.932547],[-8.1073091,7.932308],[-8.1074161,7.932331],[-8.1073881,7.932017],[-8.1075381,7.932025],[-8.1076261,7.932077],[-8.1078991,7.932037],[-8.1078691,7.931893],[-8.1080331,7.931822],[-8.1080261,7.931661],[-8.1081311,7.931656],[-8.1081071,7.931489],[-8.1083341,7.931455],[-8.1084341,7.931343],[-8.1085841,7.931315],[-8.1087301,7.931342],[-8.1087961,7.931058],[-8.1089101,7.931093],[-8.1091061,7.931029],[-8.1091641,7.930867],[-8.1093391,7.930722],[-8.1093541,7.930502],[-8.1094641,7.930327],[-8.1096001,7.930228],[-8.1097961,7.930184],[-8.1099141,7.930217],[-8.1100301,7.930128],[-8.1101531,7.930176],[-8.1102511,7.930073],[-8.1110241,7.929745],[-8.1124721,7.928408],[-8.1126251,7.928188],[-8.1131011,7.927677],[-8.1132831,7.927433],[-8.1132651,7.927187],[-8.1134621,7.927181],[-8.1134731,7.927124],[-8.1133731,7.92701],[-8.1135931,7.926902],[-8.1139901,7.926578],[-8.1142991,7.926248],[-8.1144321,7.925778],[-8.1142751,7.925444],[-8.1141701,7.925042],[-8.1140321,7.92419],[-8.1141131,7.923489],[-8.1135371,7.921851],[-8.1117711,7.9199399],[-8.1113471,7.919481],[-8.1116391,7.917623],[-8.1126311,7.91602],[-8.1143331,7.914373],[-8.1159291,7.915473],[-8.1165241,7.915327],[-8.1167911,7.915007],[-8.1169771,7.914568],[-8.1170471,7.91399],[-8.1178351,7.913185],[-8.1178351,7.912502],[-8.1173271,7.911977],[-8.1171171,7.911539],[-8.1169421,7.910349],[-8.1172751,7.910086],[-8.1177631,7.910002],[-8.1180121,7.909463],[-8.1176461,7.908501],[-8.1165601,7.907803],[-8.1161861,7.906807],[-8.1164351,7.905479],[-8.1165551,7.904269],[-8.1164591,7.904031],[-8.1151901,7.903238],[-8.1149831,7.901661],[-8.1163441,7.899746],[-8.1175141,7.898465],[-8.1182201,7.897469],[-8.1181371,7.896681],[-8.1181911,7.89549],[-8.1189381,7.894619],[-8.1201831,7.893342],[-8.1217461,7.892815],[-8.1228291,7.89216],[-8.1235131,7.891319],[-8.1238561,7.890728],[-8.1240431,7.889639],[-8.1348471,7.88311],[-8.1344731,7.860303],[-8.1257331,7.847896],[-8.1246021,7.834988],[-8.1176381,7.836729],[-8.1112921,7.837528],[-8.1112541,7.836627],[-8.1079831,7.817084],[-8.1075011,7.814731],[-8.1060323,7.8118535],[-8.1056423,7.8110893],[-8.1054431,7.810699],[-8.1049711,7.810024],[-8.1039841,7.808924],[-8.1019121,7.808267],[-8.1011371,7.807369],[-8.1002431,7.807215],[-8.0975061,7.804761],[-8.0912561,7.797761],[-8.0929951,7.797413],[-8.0942102,7.7974345],[-8.0943521,7.797437],[-8.0946711,7.7974067],[-8.0953511,7.797342],[-8.0959491,7.796731],[-8.0961171,7.795713],[-8.0960651,7.794962],[-8.0961601,7.793892],[-8.0974411,7.791576],[-8.0997601,7.792106],[-8.1002291,7.791726],[-8.1011811,7.790441],[-8.1012324,7.7903451],[-8.1020851,7.788752],[-8.1022991,7.787396],[-8.1024421,7.786039],[-8.1028231,7.784421],[-8.1035841,7.783065],[-8.1044881,7.781614],[-8.1045601,7.780043],[-8.1037031,7.777973],[-8.1024891,7.774689],[-8.1015081,7.773231],[-8.1015901,7.772652],[-8.1015951,7.772108],[-8.1018751,7.771192],[-8.1026901,7.770958],[-8.1021321,7.77042],[-8.1016441,7.770065],[-8.1009561,7.76983],[-8.1006071,7.76953],[-8.1005741,7.768588],[-8.1008771,7.767596],[-8.1009501,7.766947],[-8.1014251,7.765817],[-8.1018321,7.765502],[-8.1026601,7.765169],[-8.1033931,7.764671],[-8.1046121,7.76414],[-8.1049561,7.763565],[-8.1058451,7.763197],[-8.1060971,7.762807],[-8.1059701,7.761955],[-8.1056171,7.761208],[-8.1060421,7.760065],[-8.1056531,7.759],[-8.1055531,7.758168],[-8.1054751,7.757779],[-8.1053881,7.757643],[-8.1063921,7.756391],[-8.1066871,7.755914],[-8.1063891,7.755538],[-8.1060161,7.754933],[-8.1056591,7.754212],[-8.1051111,7.753685],[-8.1056981,7.753039],[-8.1132607,7.7390607],[-8.1155881,7.734759],[-8.1158261,7.734021],[-8.1157311,7.73326],[-8.1157491,7.731133],[-8.1161881,7.729168],[-8.1171671,7.728147],[-8.1175231,7.727241],[-8.1176111,7.726431],[-8.1179201,7.725764],[-8.1178971,7.725288],[-8.1177471,7.724992],[-8.1174101,7.724782],[-8.1171901,7.724542],[-8.1164911,7.723346],[-8.1171141,7.722787],[-8.1176451,7.722004],[-8.1181211,7.721409],[-8.1188071,7.720791],[-8.1189741,7.720322],[-8.1201311,7.71877],[-8.1219291,7.717865],[-8.1227081,7.717125],[-8.1235681,7.716698],[-8.1241151,7.715437],[-8.1253521,7.714557],[-8.1265421,7.712677],[-8.1290881,7.709777],[-8.1302971,7.708007],[-8.1310271,7.706185],[-8.1326791,7.704556],[-8.1338231,7.703207],[-8.1347461,7.70174],[-8.1359491,7.699424],[-8.1357851,7.696345],[-8.1358231,7.695563],[-8.1362001,7.695261],[-8.1367711,7.694666],[-8.1369851,7.694095],[-8.1367101,7.693705],[-8.1365811,7.692715],[-8.1367711,7.69193],[-8.1372951,7.691192],[-8.1394361,7.68955],[-8.1402211,7.688622],[-8.1403641,7.687647],[-8.1411731,7.686386],[-8.1422121,7.6867],[-8.1427951,7.686724],[-8.1437171,7.686943],[-8.1441781,7.686846],[-8.1445911,7.685729],[-8.1453681,7.683034],[-8.1456841,7.682112],[-8.1453691,7.681649],[-8.1454151,7.679768],[-8.1459501,7.678322],[-8.1463251,7.677805],[-8.1470921,7.676359],[-8.1472671,7.675711],[-8.1479421,7.674881],[-8.1480851,7.673071],[-8.1477361,7.671965],[-8.1474481,7.671512],[-8.1472994,7.6703898],[-8.1462635,7.669251],[-8.14535,7.6680558],[-8.1448067,7.6675064],[-8.1439211,7.666196],[-8.1434581,7.664948],[-8.1433608,7.6635796],[-8.143036,7.6627235],[-8.1429899,7.6618227],[-8.1436011,7.659741],[-8.1445911,7.657397],[-8.1462181,7.655771],[-8.1480871,7.655989],[-8.1502721,7.656815],[-8.1516571,7.657388],[-8.1533801,7.656665],[-8.1545391,7.655889],[-8.1555061,7.655406],[-8.1561661,7.654589],[-8.1564891,7.654105],[-8.1565471,7.653938],[-8.1567321,7.653731],[-8.1574611,7.653145],[-8.1580551,7.652794],[-8.1591341,7.651618],[-8.1607441,7.650482],[-8.1620231,7.649771],[-8.1635391,7.649487],[-8.1718151,7.640255],[-8.1706221,7.638955],[-8.1688671,7.635233],[-8.1699601,7.632284],[-8.1703701,7.630946],[-8.1703231,7.629837],[-8.1700031,7.629266],[-8.1708821,7.626544],[-8.1833211,7.610809],[-8.1849131,7.608218],[-8.1834491,7.605789],[-8.1814531,7.604289],[-8.1809151,7.603627],[-8.1791741,7.601851],[-8.1790851,7.60084],[-8.1780401,7.598964],[-8.1771801,7.597542],[-8.1759771,7.593851],[-8.1741411,7.591828],[-8.1723691,7.58861],[-8.1715331,7.586025],[-8.1711151,7.585092],[-8.1704111,7.584276],[-8.1734191,7.580547],[-8.1772071,7.575632],[-8.1796201,7.572071],[-8.1808871,7.570069],[-8.1815651,7.56855],[-8.1818071,7.56753],[-8.1818161,7.566377],[-8.1823501,7.565256],[-8.1826491,7.563559],[-8.1831951,7.561416],[-8.1848061,7.56044],[-8.1853361,7.560339],[-8.1861431,7.560234],[-8.1870201,7.560862],[-8.1875891,7.560735],[-8.1879891,7.55985],[-8.1897881,7.558366],[-8.1895171,7.557103],[-8.1903231,7.55638],[-8.1909571,7.555398],[-8.1920811,7.55429],[-8.1927551,7.553851],[-8.1931201,7.553311],[-8.1941641,7.552864],[-8.1949571,7.553095],[-8.1957301,7.552769],[-8.1967781,7.552728],[-8.1982471,7.553256],[-8.1989401,7.553165],[-8.1997211,7.552641],[-8.2001691,7.552036],[-8.2010221,7.550215],[-8.2027991,7.550262],[-8.2043591,7.549587],[-8.2050701,7.548761],[-8.2051401,7.546642],[-8.2054291,7.545162],[-8.2063341,7.542307],[-8.2072411,7.540364],[-8.2100931,7.536841],[-8.2187131,7.538724],[-8.2270071,7.549912],[-8.2292111,7.552144],[-8.2591881,7.572968],[-8.2602911,7.573656],[-8.2979811,7.58501],[-8.3079221,7.612193],[-8.3085081,7.611932],[-8.3088521,7.611677],[-8.3096311,7.611254],[-8.3100961,7.61105],[-8.3104061,7.610837],[-8.3109881,7.611184],[-8.3114021,7.611264],[-8.3114921,7.611236],[-8.3118991,7.610814],[-8.3122491,7.610693],[-8.3123391,7.610569],[-8.3122951,7.610382],[-8.3124131,7.610253],[-8.3130681,7.609906],[-8.3145211,7.608279],[-8.3149551,7.607978],[-8.3153981,7.608049],[-8.3160491,7.607768],[-8.3164671,7.60773],[-8.3182411,7.607707],[-8.3182971,7.606636],[-8.3184111,7.606489],[-8.3186281,7.606534],[-8.3188551,7.606755],[-8.3195121,7.60694],[-8.3195011,7.607059],[-8.3196441,7.607152],[-8.3197931,7.607411],[-8.3200891,7.608112],[-8.3204271,7.608246],[-8.3210041,7.607706],[-8.3216711,7.607962],[-8.3233261,7.608312],[-8.3240591,7.60864],[-8.3250621,7.608755],[-8.3257961,7.608577],[-8.3265511,7.608225],[-8.3273571,7.607688],[-8.3304681,7.607509],[-8.3305391,7.607136],[-8.3302091,7.606344],[-8.3303281,7.606139],[-8.3310581,7.606146],[-8.3312641,7.605943],[-8.3312731,7.605789],[-8.3309391,7.605218],[-8.3309811,7.604851],[-8.3308241,7.604801],[-8.3300571,7.604806],[-8.3295151,7.604654],[-8.3295091,7.604381],[-8.3292741,7.603853],[-8.3291981,7.603053],[-8.3290181,7.602368],[-8.3286091,7.601931],[-8.3289541,7.601762],[-8.3294721,7.601661],[-8.3298121,7.60138],[-8.3311781,7.599927],[-8.3315651,7.599199],[-8.3318911,7.598689],[-8.3316371,7.598078],[-8.3320501,7.597792],[-8.3327481,7.597538],[-8.3334461,7.596872],[-8.3335731,7.596269],[-8.3340171,7.595603],[-8.3345601,7.595825],[-8.3357621,7.595032],[-8.3366171,7.594074],[-8.3387311,7.592966],[-8.3392831,7.592304],[-8.3396731,7.591964],[-8.3407401,7.59148],[-8.3427601,7.590816],[-8.3435481,7.590813],[-8.3434871,7.590162],[-8.3439321,7.590063],[-8.3445821,7.590114],[-8.3454881,7.589901],[-8.3459041,7.589691],[-8.3461911,7.590035],[-8.3471571,7.590859],[-8.3478511,7.591847],[-8.3493821,7.592215],[-8.3500831,7.591037],[-8.3519111,7.591036],[-8.3524351,7.590582],[-8.3524891,7.589697],[-8.3524751,7.588935],[-8.3536121,7.587937],[-8.3546581,7.587412],[-8.3559401,7.587997],[-8.3565821,7.587514],[-8.3580391,7.588861],[-8.3586751,7.588839],[-8.3594111,7.588278],[-8.3602381,7.587915],[-8.3606731,7.588341],[-8.3615921,7.588257],[-8.3619661,7.588316],[-8.3628081,7.589576],[-8.3634801,7.590344],[-8.3647181,7.590761],[-8.3664191,7.59145],[-8.3678161,7.591728],[-8.3696051,7.592249],[-8.3702731,7.592943],[-8.3721391,7.592657],[-8.3728411,7.594104],[-8.3731981,7.593771],[-8.3733171,7.593391],[-8.3736501,7.5932],[-8.3745551,7.593093],[-8.3762201,7.593759],[-8.3776241,7.593807],[-8.3792431,7.593664],[-8.3822401,7.593105],[-8.3825491,7.593391],[-8.3824351,7.594197],[-8.3822161,7.594818],[-8.3824061,7.595413],[-8.3827391,7.595818],[-8.3835011,7.596079],[-8.3841671,7.596841],[-8.3841911,7.597293],[-8.3840041,7.598626],[-8.3840101,7.600452],[-8.3835711,7.602987],[-8.3829541,7.603789],[-8.3825961,7.604891],[-8.3816451,7.606573],[-8.3815971,7.607501],[-8.3816921,7.608215],[-8.3816451,7.608667],[-8.3814781,7.609095],[-8.3815971,7.611046],[-8.3810591,7.611907],[-8.3812671,7.613675],[-8.3807021,7.614192],[-8.3805461,7.615209],[-8.3806471,7.615824],[-8.3802241,7.616457],[-8.3801701,7.616995],[-8.3805031,7.617233],[-8.3809341,7.617806],[-8.3809321,7.618336],[-8.3807171,7.618994],[-8.3808531,7.619582],[-8.3813591,7.62016],[-8.3820741,7.620543],[-8.3830171,7.621601],[-8.3841421,7.623256],[-8.3850881,7.62399],[-8.3860201,7.624404],[-8.3875441,7.623416],[-8.3886931,7.623274],[-8.3906901,7.623755],[-8.3913001,7.624365],[-8.3923701,7.624642],[-8.3927461,7.624789],[-8.3935051,7.625409],[-8.3938701,7.626075],[-8.3945671,7.626123],[-8.3955351,7.626825],[-8.3963471,7.627697],[-8.3970631,7.628078],[-8.3981481,7.627675],[-8.3987621,7.62717],[-8.3998231,7.625875],[-8.4003851,7.625277],[-8.4022441,7.625082],[-8.4033471,7.625394],[-8.4042281,7.625342],[-8.4049271,7.625165],[-8.4051151,7.624934],[-8.4054101,7.624675],[-8.4057601,7.624094],[-8.4064541,7.623965],[-8.4072281,7.623686],[-8.4076051,7.623322],[-8.4079021,7.622887],[-8.4081451,7.62246],[-8.4087401,7.621074],[-8.4095081,7.620057],[-8.4095291,7.619706],[-8.4103931,7.618595],[-8.4109491,7.618211],[-8.4115601,7.617608],[-8.4119721,7.616699],[-8.4122181,7.615501],[-8.4129661,7.613899],[-8.4135981,7.613326],[-8.4145821,7.612754],[-8.4150111,7.612678],[-8.4157651,7.612652],[-8.4165801,7.611398],[-8.4174851,7.610708],[-8.4180411,7.610197],[-8.4186901,7.609503],[-8.4205281,7.608323],[-8.4217981,7.607024],[-8.4226261,7.605436],[-8.4227441,7.604701],[-8.4233241,7.604048],[-8.4233991,7.603837],[-8.4233091,7.603597],[-8.4234051,7.603455],[-8.4244381,7.602979],[-8.4253131,7.601975],[-8.4264251,7.60136],[-8.4269851,7.600704],[-8.4274261,7.599959],[-8.4282091,7.599766],[-8.4293451,7.598749],[-8.4297141,7.598157],[-8.4300251,7.597526],[-8.4309531,7.596645],[-8.4309191,7.59593],[-8.4322821,7.593702],[-8.4324981,7.592986],[-8.4334051,7.592641],[-8.4344081,7.592506],[-8.4348781,7.592077],[-8.4372821,7.590149],[-8.4386161,7.588652],[-8.4399711,7.587889],[-8.4409231,7.586968],[-8.4416841,7.586414],[-8.4426151,7.585943],[-8.4433651,7.585406],[-8.4440381,7.584595],[-8.4456901,7.582391],[-8.4466811,7.580822],[-8.4474181,7.579275],[-8.4491551,7.578228],[-8.4509331,7.576973],[-8.4515111,7.575468],[-8.4524391,7.573826],[-8.4538431,7.572636],[-8.4553081,7.571559],[-8.4562221,7.57103],[-8.4571681,7.570235],[-8.4579831,7.569448],[-8.4588161,7.569067],[-8.4599821,7.56783],[-8.4606721,7.566521],[-8.4616241,7.56595],[-8.4626951,7.564903],[-8.4637411,7.563499],[-8.4651221,7.562191],[-8.4668821,7.560311],[-8.4680241,7.559597],[-8.4685721,7.559121],[-8.4695971,7.5577791],[-8.4710168,7.5571723],[-8.4717173,7.5586301],[-8.489244,7.5725609],[-8.499756,7.5809269],[-8.499881,7.5813159],[-8.5037378,7.5841892],[-8.518242,7.5951559],[-8.52105,7.5973559],[-8.52179,7.5978499],[-8.558759,7.6259979],[-8.559864,7.6263699],[-8.56103,7.6269249],[-8.561466,7.6270559],[-8.561841,7.6271259],[-8.562682,7.6271559],[-8.562824,7.6272459],[-8.563047,7.6275189],[-8.563575,7.6284479],[-8.564366,7.6290929],[-8.564852,7.6293859],[-8.56541,7.6296279],[-8.565836,7.6297589],[-8.566302,7.6297879],[-8.567204,7.6299389],[-8.567863,7.6300999],[-8.568583,7.6303919],[-8.569566,7.6309569],[-8.569942,7.6315019],[-8.570094,7.6318449],[-8.570165,7.6322699],[-8.570115,7.6324509],[-8.56978,7.6327549],[-8.569791,7.6329259],[-8.569142,7.6335129],[-8.568849,7.6338459],[-8.568585,7.6339979],[-8.567826,7.6346049],[-8.56738,7.6348169],[-8.566681,7.6354639],[-8.56657,7.6356559],[-8.566225,7.6357879],[-8.566134,7.6362619],[-8.566013,7.6364339],[-8.565698,7.6365149],[-8.565101,7.6369599],[-8.564544,7.6376369],[-8.564341,7.6376579],[-8.564118,7.6375369],[-8.563814,7.6372539],[-8.563682,7.6372239],[-8.563469,7.6372849],[-8.563388,7.6373759],[-8.563267,7.6384669],[-8.563024,7.6389719],[-8.562761,7.6391939],[-8.562052,7.6396189],[-8.561849,7.6398509],[-8.561718,7.6402559],[-8.561505,7.6406189],[-8.561242,7.6407099],[-8.56109,7.6408419],[-8.560958,7.6413269],[-8.560949,7.6416499],[-8.561101,7.6423769],[-8.561355,7.6427499],[-8.561335,7.6428919],[-8.561011,7.6433469],[-8.560676,7.6433669],[-8.560413,7.6434779],[-8.560291,7.6436099],[-8.560291,7.6440639],[-8.560464,7.6445289],[-8.560393,7.6448119],[-8.56013,7.6451049],[-8.559796,7.6452359],[-8.559644,7.6454079],[-8.55938,7.6457919],[-8.559219,7.6461859],[-8.559077,7.6463379],[-8.558854,7.6464889],[-8.558631,7.6465699],[-8.558489,7.6467119],[-8.558368,7.6469849],[-8.558206,7.6471259],[-8.557922,7.6472879],[-8.557608,7.6473489],[-8.557476,7.6475109],[-8.557456,7.6479749],[-8.557629,7.6482069],[-8.557659,7.6483789],[-8.557477,7.6489649],[-8.557285,7.6492679],[-8.557042,7.6494909],[-8.556018,7.6502079],[-8.555958,7.6504709],[-8.555644,7.6511579],[-8.555625,7.6531379],[-8.555494,7.6537129],[-8.554957,7.6544809],[-8.554785,7.6549259],[-8.55437,7.6553609],[-8.554188,7.6558759],[-8.554015,7.6560879],[-8.553813,7.6565019],[-8.553762,7.6567039],[-8.553743,7.6572899],[-8.554006,7.6576229],[-8.554899,7.6579559],[-8.555243,7.6583089],[-8.555274,7.6584699],[-8.555031,7.6589759],[-8.555041,7.6591879],[-8.555143,7.6593689],[-8.555599,7.6596919],[-8.555751,7.6598739],[-8.555853,7.6600959],[-8.555934,7.6605609],[-8.556401,7.6610249],[-8.556401,7.6616709],[-8.557192,7.6627809],[-8.557264,7.6630139],[-8.557051,7.6636899],[-8.556828,7.6641849],[-8.556849,7.6644179],[-8.556971,7.6646699],[-8.557447,7.6651339],[-8.557498,7.6652859],[-8.557225,7.6655889],[-8.557103,7.6658819],[-8.55683,7.6661549],[-8.556597,7.6666199],[-8.556141,7.6672969],[-8.55603,7.6675899],[-8.55601,7.6678419],[-8.556172,7.6682859],[-8.556112,7.6685089],[-8.55596,7.6687009],[-8.555575,7.6690239],[-8.555099,7.6692269],[-8.554835,7.6694589],[-8.554815,7.6695799],[-8.554937,7.6698019],[-8.555201,7.6701149],[-8.555343,7.6703779],[-8.555383,7.6705899],[-8.555302,7.6708629],[-8.554816,7.6713779],[-8.554563,7.6717419],[-8.554239,7.6719739],[-8.554077,7.6721969],[-8.554047,7.6724999],[-8.554179,7.6727519],[-8.554067,7.6734189],[-8.55421,7.6737819],[-8.554139,7.6742369],[-8.55419,7.6747419],[-8.554393,7.6748119],[-8.555731,7.6749629],[-8.555883,7.6751639],[-8.555863,7.6754879],[-8.555407,7.6761649],[-8.555469,7.6768619],[-8.555631,7.6772049],[-8.555905,7.6775979],[-8.555845,7.6785279],[-8.556007,7.6786589],[-8.55626,7.6787799],[-8.556423,7.6790019],[-8.556494,7.6794359],[-8.556272,7.6802539],[-8.556403,7.6805169],[-8.556951,7.6810719],[-8.557539,7.6815459],[-8.557803,7.6818279],[-8.558067,7.6823739],[-8.558189,7.6829089],[-8.5582,7.6836969],[-8.558018,7.6847369],[-8.558079,7.6849789],[-8.558292,7.6852419],[-8.558424,7.6854939],[-8.558384,7.6862309],[-8.558627,7.6867159],[-8.558709,7.6869779],[-8.558719,7.6873019],[-8.558486,7.6878879],[-8.558274,7.6881199],[-8.557757,7.6886559],[-8.557028,7.6893029],[-8.555954,7.6901619],[-8.55569,7.6906269],[-8.555285,7.6909099],[-8.555123,7.6910819],[-8.555113,7.6915569],[-8.554911,7.6921119],[-8.55483,7.6923039],[-8.554506,7.6927189],[-8.553989,7.6932039],[-8.553553,7.6931939],[-8.553706,7.6942539],[-8.55392,7.6951429],[-8.55395,7.6954759],[-8.5538849,7.6957521],[-8.5817851,7.6957766]]]]}]}
