# Supplementary material
Source: ML conference proceedings conference paper supplement (https://proceedings.neurips.cc/paper_files/paper/2022/hash/9d3faa41886997cfc2128b930077fa49-Abstract.html)
Supplement: Supplementary file 1 [file 9d3faa41886997cfc2128b930077fa49-Supplemental-Conference.zip › code/ebola/map/geojson/macenta.geojson]

{"type":"GeometryCollection","geometries":[{"type":"MultiPolygon","coordinates":[[[[-9.9004868,8.4991355],[-9.8987154,8.506459],[-9.9027508,8.5149274],[-9.8958912,8.5255103],[-9.8983607,8.5331081],[-9.9079641,8.540163],[-9.9096104,8.5472178],[-9.8871109,8.5537298],[-9.882172,8.5683815],[-9.8909523,8.5789629],[-9.8934217,8.5925283],[-9.8898548,8.5998534],[-9.8909523,8.6088062],[-9.8978119,8.6185726],[-9.9109823,8.6302377],[-9.91647,8.6362057],[-9.9260734,8.6421737],[-9.9312374,8.6426083],[-9.9389694,8.6432587],[-9.9444571,8.6508542],[-9.945829,8.6706558],[-9.9343049,8.7013055],[-9.9296404,8.7297831],[-9.9140005,8.7547332],[-9.9115311,8.7680211],[-9.9013789,8.7701905],[-9.889306,8.7829355],[-9.8829952,8.8051705],[-9.8595547,8.8156605],[-9.8121573,8.8265167],[-9.7735615,8.8249778],[-9.7349339,8.8354371],[-9.6994949,8.8473844],[-9.6744791,8.8461485],[-9.6619712,8.8350251],[-9.6578019,8.787644],[-9.6529768,8.776555],[-9.6398739,8.7464382],[-9.6307014,8.7229488],[-9.6194443,8.7002822],[-9.6175752,8.6963561],[-9.6159527,8.6929476],[-9.6127735,8.6862694],[-9.5884967,8.6895419],[-9.5760836,8.6912152],[-9.5243843,8.6677223],[-9.4972222,8.6492122],[-9.4814406,8.6384573],[-9.4439169,8.6306254],[-9.3817943,8.6537084],[-9.3567785,8.6343353],[-9.2842328,8.58899],[-9.2208594,8.5720872],[-9.1337211,8.5724995],[-9.0791033,8.5848675],[-9.0318155,8.6055706],[-8.9953004,8.6215567],[-8.9200615,8.6544319],[-8.914889,8.6532287],[-8.9176274,8.6454078],[-8.9158018,8.6345786],[-8.890852,8.6309687],[-8.8904887,8.6167789],[-8.8902435,8.6072032],[-8.9002842,8.5783216],[-8.9018056,8.568694],[-8.9018056,8.5584643],[-8.8975458,8.5292781],[-8.8917648,8.4669867],[-8.885071,8.4326769],[-8.8735089,8.4182298],[-8.8738132,8.4076951],[-8.8847667,8.4007722],[-8.8938947,8.3489966],[-8.901197,8.338159],[-8.916106,8.3246116],[-8.9221913,8.3023325],[-8.9216945,8.277014],[-8.9218892,8.2766818],[-8.9227889,8.2762765],[-8.9234067,8.2756918],[-8.9240982,8.2756652],[-8.9241519,8.275426],[-8.9238699,8.2749742],[-8.9240646,8.2746686],[-8.9251725,8.2742234],[-8.9260185,8.2739576],[-8.9266899,8.2737118],[-8.9271599,8.2731603],[-8.9273345,8.2725822],[-8.9277642,8.2721968],[-8.9280865,8.2717384],[-8.9278851,8.2713729],[-8.9282073,8.2710474],[-8.9280932,8.2707882],[-8.9276568,8.2708879],[-8.9276031,8.2707085],[-8.9280462,8.2704228],[-8.9288116,8.2701637],[-8.9292548,8.2704693],[-8.9294226,8.27027],[-8.9295703,8.269466],[-8.9296241,8.2691803],[-8.9293085,8.2689278],[-8.9289593,8.2690407],[-8.9287042,8.2695258],[-8.9282409,8.269765],[-8.9280328,8.2695723],[-8.9280395,8.2692401],[-8.9284826,8.2690075],[-8.9286639,8.2686886],[-8.9290399,8.2684826],[-8.9289593,8.2682168],[-8.9285431,8.2683431],[-8.9281268,8.2686022],[-8.9277306,8.2686221],[-8.9275762,8.2684095],[-8.9280261,8.267971],[-8.9286505,8.2676653],[-8.9286841,8.2673265],[-8.9276971,8.2663896],[-8.9279119,8.2659909],[-8.927593,8.2651205],[-8.9271499,8.263639],[-8.9264988,8.2630145],[-8.9262504,8.2624432],[-8.9272506,8.2621243],[-8.9277071,8.2619051],[-8.9281569,8.2615065],[-8.928271,8.2610481],[-8.9285932,8.2605764],[-8.9292109,8.2607292],[-8.9295667,8.2612607],[-8.9294324,8.2617191],[-8.9295868,8.2619184],[-8.9300701,8.2618187],[-8.9310368,8.2618121],[-8.9315067,8.2624033],[-8.9317618,8.2625628],[-8.9321244,8.2623967],[-8.9322049,8.2619516],[-8.9319431,8.2610481],[-8.9322318,8.2607491],[-8.9327017,8.2607026],[-8.9338093,8.2613271],[-8.9340443,8.2618652],[-8.9344404,8.2618719],[-8.9350513,8.2614932],[-8.936018,8.2608355],[-8.9372196,8.2611411],[-8.9379178,8.2609551],[-8.9385354,8.2612009],[-8.9391866,8.2609418],[-8.9394618,8.2602309],[-8.9394349,8.2597194],[-8.9388442,8.2591613],[-8.9386495,8.2589421],[-8.9389516,8.2586963],[-8.9392738,8.2584704],[-8.9400324,8.2581581],[-8.9407373,8.2580452],[-8.9410192,8.2582711],[-8.9410192,8.2587826],[-8.9403949,8.2592942],[-8.9404688,8.2596662],[-8.940838,8.2598987],[-8.9412542,8.2603837],[-8.941845,8.2605432],[-8.9420396,8.2601778],[-8.9418047,8.2594271],[-8.9419927,8.2590085],[-8.9430198,8.2588291],[-8.943483,8.2586697],[-8.9438455,8.2582977],[-8.9438656,8.2576466],[-8.944161,8.2573144],[-8.9445369,8.2573543],[-8.94498,8.2582445],[-8.9453626,8.2583707],[-8.9459333,8.2582777],[-8.9462958,8.25857],[-8.9469067,8.2587561],[-8.9471013,8.258477],[-8.9465307,8.2569424],[-8.9465777,8.2563976],[-8.947343,8.2558196],[-8.9477055,8.2548032],[-8.9480747,8.254358],[-8.948162,8.2529496],[-8.9484373,8.2521922],[-8.9486521,8.2515744],[-8.9490951,8.2509034],[-8.9496792,8.2505512],[-8.9501424,8.2501061],[-8.9499544,8.2490166],[-8.9495718,8.2481462],[-8.9495583,8.2467245],[-8.9496188,8.2464056],[-8.9504512,8.2465252],[-8.9509345,8.2464587],[-8.9514514,8.2460003],[-8.9517871,8.2434425],[-8.952163,8.2424526],[-8.9520691,8.2414028],[-8.9518072,8.2405724],[-8.9518341,8.2397286],[-8.9517334,8.2386722],[-8.9522033,8.2381606],[-8.9528344,8.2373833],[-8.9535527,8.2366857],[-8.9537876,8.2362937],[-8.9536399,8.2357688],[-8.9529418,8.2349583],[-8.9529888,8.2346992],[-8.9535459,8.2344999],[-8.9540226,8.234274],[-8.9546402,8.2340481],[-8.9554323,8.2347058],[-8.9560231,8.2358021],[-8.9558083,8.2365329],[-8.9554055,8.2369581],[-8.9551638,8.2374232],[-8.9551302,8.2377886],[-8.955533,8.2381407],[-8.9559627,8.2385659],[-8.956352,8.2382337],[-8.9568757,8.2373102],[-8.9572516,8.2368119],[-8.958084,8.2363269],[-8.9593058,8.2362007],[-8.9607827,8.2358752],[-8.9618702,8.2354101],[-8.9622529,8.2347058],[-8.9621656,8.233975],[-8.9619709,8.2337225],[-8.961266,8.233789],[-8.9610781,8.2333305],[-8.9613399,8.2320217],[-8.9614204,8.2297561],[-8.9617494,8.2283808],[-8.9614339,8.2265669],[-8.9608364,8.226248],[-8.9600711,8.2262414],[-8.9593662,8.2261882],[-8.959044,8.2258627],[-8.9594266,8.2252846],[-8.9600577,8.2250787],[-8.9605679,8.2247066],[-8.9610042,8.2240621],[-8.9614607,8.2226934],[-8.9623737,8.2218164],[-8.9630987,8.2215839],[-8.9638707,8.2209261],[-8.9650858,8.2198896],[-8.9654148,8.2189993],[-8.9661801,8.2182817],[-8.9663882,8.2179296],[-8.966227,8.2176439],[-8.9662807,8.2173848],[-8.9673414,8.2171721],[-8.9675093,8.2165476],[-8.9671937,8.2157436],[-8.9672139,8.2153981],[-8.9682208,8.2150925],[-8.9694359,8.2144281],[-8.9719802,8.2131856],[-8.9735108,8.2123152],[-8.9743499,8.2113385],[-8.9755784,8.2110461],[-8.9769748,8.2104149],[-8.9775789,8.2098037],[-8.978116,8.2086409],[-8.9780019,8.2083618],[-8.9771224,8.2083153],[-8.9764981,8.2092721],[-8.9759946,8.2096708],[-8.9745715,8.2101957],[-8.9741015,8.2101824],[-8.9740948,8.2097239],[-8.9746722,8.2084083],[-8.9751824,8.2063353],[-8.9756053,8.2053652],[-8.9757328,8.2043287],[-8.9762565,8.2031061],[-8.9770016,8.2020696],[-8.9773037,8.200548],[-8.977203,8.1997241],[-8.9767499,8.1985812],[-8.9771123,8.1974452],[-8.9777969,8.1967676],[-8.9778372,8.1960568],[-8.9773741,8.195326],[-8.9775889,8.1940637],[-8.978099,8.1933994],[-8.9785487,8.1934858],[-8.9785352,8.1939176],[-8.9787836,8.1945354],[-8.9793004,8.1949739],[-8.9807233,8.1954522],[-8.9815623,8.1950802],[-8.9817637,8.1943959],[-8.9824147,8.193147],[-8.982804,8.1913665],[-8.9834081,8.1898784],[-8.9843477,8.1887158],[-8.9854351,8.1883305],[-8.9857438,8.1878787],[-8.9853143,8.1868822],[-8.9854821,8.1860916],[-8.9843276,8.1847496],[-8.9852539,8.1833678],[-8.9858915,8.1821453],[-8.9861868,8.1794281],[-8.9866634,8.1789763],[-8.9875292,8.1788169],[-8.9878715,8.1775945],[-8.9870459,8.1769633],[-8.9859922,8.1772423],[-8.9853545,8.1769434],[-8.9848176,8.1761329],[-8.9838108,8.1756744],[-8.9835289,8.1750964],[-8.9836631,8.1742593],[-8.9836833,8.1733292],[-8.9831262,8.1718742],[-8.9821127,8.1703129],[-8.9811864,8.1693097],[-8.9802333,8.1674628],[-8.9798306,8.1675358],[-8.979146,8.1677418],[-8.977864,8.167682],[-8.977072,8.167775],[-8.9755552,8.1683597],[-8.9748974,8.1684328],[-8.9743067,8.1678547],[-8.9737362,8.1670841],[-8.9732731,8.1666589],[-8.9728368,8.1656357],[-8.9731523,8.1648318],[-8.9744007,8.1631442],[-8.9747229,8.1623005],[-8.9743336,8.1615829],[-8.9737027,8.1613238],[-8.9711186,8.1607325],[-8.97083,8.1603405],[-8.971085,8.1595366],[-8.9719106,8.1583407],[-8.972716,8.157364],[-8.9725616,8.1559621],[-8.9716891,8.1545137],[-8.9715213,8.1529258],[-8.9710515,8.1514508],[-8.9706152,8.1490457],[-8.9712394,8.1484277],[-8.9715146,8.1485806],[-8.9717629,8.1492583],[-8.9721992,8.149617],[-8.9728503,8.1496768],[-8.9737631,8.1491121],[-8.9747162,8.1483414],[-8.9751994,8.1474776],[-8.9751927,8.1467268],[-8.9743403,8.1453183],[-8.9740181,8.1440027],[-8.974045,8.1429463],[-8.9744074,8.1423018],[-8.975535,8.1417437],[-8.9771794,8.1418035],[-8.9788306,8.1419762],[-8.9796293,8.1418168],[-8.9810388,8.1417238],[-8.9826832,8.1414646],[-8.984784,8.1412653],[-8.9857304,8.1410793],[-8.9867238,8.140375],[-8.987603,8.1393318],[-8.988489,8.1387405],[-8.9898784,8.1386076],[-8.9908046,8.1383883],[-8.9915765,8.1377106],[-8.9931001,8.1371259],[-8.9934424,8.1371525],[-8.9939055,8.1379963],[-8.9938652,8.1386408],[-8.9939391,8.139272],[-8.9949928,8.1412653],[-8.9954559,8.1415643],[-8.9972749,8.1410593],[-8.9977514,8.140375],[-8.9985233,8.1394514],[-8.9993421,8.1389863],[-9.0002348,8.1384481],[-9.000463,8.1378834],[-9.0002147,8.1369],[-8.998624,8.1350994],[-8.9975031,8.1343153],[-8.9966641,8.1335446],[-8.9963352,8.1330064],[-8.9971004,8.1322822],[-8.9975165,8.1314715],[-8.9982817,8.1305812],[-8.9995234,8.1305214],[-9.0007114,8.1303752],[-9.002584,8.1296377],[-9.0030605,8.1289068],[-9.00347,8.1283686],[-9.0039264,8.1276045],[-9.0039566,8.1254384],[-9.0041848,8.1233188],[-9.0031042,8.1219766],[-9.0032115,8.1212723],[-9.0049466,8.1210995],[-9.0068863,8.1213121],[-9.0080205,8.1216576],[-9.008591,8.1216709],[-9.0094636,8.1213254],[-9.0106314,8.1203952],[-9.0111214,8.1204284],[-9.0123228,8.1220962],[-9.0127859,8.1226477],[-9.0132087,8.1226676],[-9.0136584,8.1219566],[-9.0138866,8.121053],[-9.013692,8.1195115],[-9.0141886,8.1185015],[-9.0152659,8.117146],[-9.0166216,8.1157906],[-9.0167625,8.1154651],[-9.0164941,8.1151794],[-9.01538,8.1148405],[-9.0136954,8.1135981],[-9.0126619,8.1130001],[-9.0114337,8.1116247],[-9.0109438,8.1102228],[-9.0110981,8.109173],[-9.0117022,8.1086614],[-9.0131384,8.1083823],[-9.0143062,8.1087013],[-9.0153397,8.1086348],[-9.0156484,8.1083823],[-9.0156551,8.1078973],[-9.0151652,8.1076913],[-9.0147558,8.1074322],[-9.0141518,8.1058376],[-9.0140713,8.1048343],[-9.0134538,8.1035386],[-9.0126552,8.1025553],[-9.0126753,8.1020636],[-9.0140444,8.1007679],[-9.0139959,8.1002483],[-9.0116435,8.097668],[-9.0095293,8.0967133],[-9.0087701,8.0952475],[-9.0091497,8.0943831],[-9.0115034,8.0944206],[-9.012365,8.0914096],[-9.0121652,8.0907081],[-9.0117311,8.0906621],[-9.0090738,8.0926541],[-9.0073655,8.0930299],[-9.004822,8.092391],[-9.004692,8.0894116],[-9.0049873,8.0876973],[-9.0047256,8.0866077],[-9.0048866,8.0860961],[-9.0054839,8.0860961],[-9.0058865,8.0867406],[-9.0067925,8.0874515],[-9.0080877,8.0884415],[-9.0091346,8.0893452],[-9.0097117,8.0889597],[-9.0102956,8.0875379],[-9.0099399,8.0869067],[-9.009846,8.0864615],[-9.0101614,8.0837905],[-9.011262,8.0836444],[-9.0123424,8.0853719],[-9.0134229,8.086023],[-9.015624,8.0870063],[-9.0185097,8.0880428],[-9.0208183,8.087983],[-9.0223282,8.0877638],[-9.0233684,8.0871459],[-9.0247643,8.0855778],[-9.0270057,8.083166],[-9.0276969,8.0821959],[-9.0283345,8.0814318],[-9.0286566,8.0808073],[-9.0279318,8.0787344],[-9.0272674,8.0764885],[-9.0262004,8.0748673],[-9.0263749,8.0744022],[-9.0284687,8.073306],[-9.029737,8.0725949],[-9.0307437,8.0725485],[-9.0322133,8.0732196],[-9.0336226,8.0739836],[-9.0342467,8.0745882],[-9.0344883,8.0758241],[-9.0350319,8.076874],[-9.0356426,8.0788805],[-9.0364546,8.0798971],[-9.0372599,8.080907],[-9.0388907,8.0813455],[-9.0397094,8.0811262],[-9.0401255,8.0803887],[-9.0397295,8.0786812],[-9.0398839,8.0780832],[-9.0403402,8.0778042],[-9.0412328,8.0778241],[-9.0426152,8.0777178],[-9.044709,8.077153],[-9.0453466,8.0766745],[-9.046219,8.0767808],[-9.0469773,8.0771198],[-9.0487557,8.0770798],[-9.0496549,8.0763556],[-9.0502656,8.0764486],[-9.0520641,8.0763556],[-9.054234,8.0757046],[-9.0548827,8.0752261],[-9.0547485,8.0742759],[-9.0549297,8.0733192],[-9.0559565,8.0722761],[-9.0568087,8.0718707],[-9.0574865,8.071512],[-9.0582919,8.0708874],[-9.0597682,8.0703093],[-9.06054,8.0697511],[-9.060795,8.0690136],[-9.0609695,8.0686614],[-9.0614393,8.0682162],[-9.0617414,8.0677622],[-9.0620097,8.0673591],[-9.0630968,8.0658109],[-9.0645173,8.0643162],[-9.0647533,8.063971],[-9.0649169,8.0635531],[-9.064933,8.0629423],[-9.0649491,8.0627405],[-9.0650108,8.0626113],[-9.0655043,8.0619262],[-9.0660998,8.061087],[-9.0665665,8.0603753],[-9.0667221,8.0600671],[-9.0672987,8.0595217],[-9.0678298,8.0589374],[-9.0680122,8.0586718],[-9.0679478,8.0584009],[-9.0675965,8.0580806],[-9.0673041,8.0577901],[-9.0669071,8.0571846],[-9.0663439,8.0565155],[-9.0645971,8.0523283],[-9.0635719,8.0505518],[-9.0635719,8.0475063],[-9.0676729,8.0458567],[-9.0720302,8.0415423],[-9.0756186,8.0383698],[-9.0785662,8.0379891],[-9.0863838,8.0346898],[-9.089075,8.0349436],[-9.0927916,8.0338015],[-9.0935605,8.031898],[-9.092279,8.0302483],[-9.0935605,8.0275835],[-9.0974052,8.0235227],[-9.1027878,8.0221267],[-9.1039412,8.0203501],[-9.1027878,8.0187004],[-9.1007373,8.0174313],[-9.0999684,8.0161623],[-9.1007373,8.0134973],[-9.102916,8.0142587],[-9.1063762,8.0114668],[-9.106248,8.0081671],[-9.1053509,8.005756],[-9.1044538,8.0047406],[-9.1044812,8.0028642],[-9.1043009,8.0009757],[-9.1044717,7.9994724],[-9.1063977,7.9975463],[-9.1080392,7.9962403],[-9.1091872,7.9957517],[-9.1131627,7.9951786],[-9.1149655,7.9936001],[-9.1166923,7.993337],[-9.1182768,7.9925008],[-9.1192066,7.991486],[-9.1191023,7.9904055],[-9.1174703,7.9891746],[-9.1173565,7.988235],[-9.1178593,7.9876618],[-9.1199562,7.9870511],[-9.1214553,7.9860833],[-9.1227362,7.9842887],[-9.1235996,7.9838376],[-9.1242448,7.9829732],[-9.126076,7.981498],[-9.1269394,7.9802953],[-9.1270248,7.9781623],[-9.1273854,7.9768562],[-9.1274423,7.9754093],[-9.1282203,7.9746106],[-9.1299187,7.9738401],[-9.1317024,7.9722897],[-9.1331826,7.9717541],[-9.1349758,7.9715567],[-9.1363801,7.9711339],[-9.1373005,7.9704213],[-9.1376123,7.9695856],[-9.1377671,7.9689036],[-9.1377818,7.9682495],[-9.1378128,7.9675915],[-9.1377171,7.9671498],[-9.1377216,7.9660522],[-9.1376237,7.9649013],[-9.1375098,7.9641067],[-9.1370158,7.9622542],[-9.1369683,7.9608635],[-9.1374048,7.9596607],[-9.1388849,7.9589372],[-9.1395111,7.9581197],[-9.1402702,7.9564283],[-9.1415932,7.9551659],[-9.1450186,7.9519136],[-9.1481598,7.9504263],[-9.1504897,7.9464634],[-9.1515523,7.9441615],[-9.1518748,7.9415964],[-9.1522448,7.9392568],[-9.1528738,7.9380672],[-9.1536352,7.9379189],[-9.1542793,7.9388277],[-9.1557379,7.9405335],[-9.1570214,7.9422581],[-9.158074,7.9423201],[-9.1590374,7.9413051],[-9.1609347,7.9400555],[-9.1619357,7.9396298],[-9.1635056,7.9406286],[-9.1654781,7.9401352],[-9.1672771,7.9402148],[-9.1698575,7.9396644],[-9.1718311,7.9394665],[-9.1724423,7.9391613],[-9.1728598,7.9380674],[-9.1731583,7.937624],[-9.1735593,7.9373459],[-9.174858,7.9369392],[-9.1774892,7.9355925],[-9.1781153,7.9338355],[-9.1782292,7.9317496],[-9.178692,7.93064],[-9.1787591,7.9275638],[-9.1784573,7.9257234],[-9.1773034,7.9232252],[-9.1774577,7.9228133],[-9.1788799,7.9220691],[-9.1796983,7.9205742],[-9.1798861,7.9199827],[-9.1786988,7.9193848],[-9.1772297,7.9188466],[-9.1767869,7.9176639],[-9.1773303,7.9168467],[-9.1783164,7.9164879],[-9.179497,7.9168666],[-9.1802349,7.9165942],[-9.1808118,7.9154049],[-9.1800605,7.9132654],[-9.1799532,7.9114249],[-9.1810399,7.9102754],[-9.1830926,7.9069466],[-9.1840787,7.9044682],[-9.1851185,7.9035779],[-9.1859889,7.9034418],[-9.1888469,7.9033123],[-9.1907336,7.9023686],[-9.1910605,7.9004906],[-9.1938158,7.898113],[-9.1960387,7.8967531],[-9.1969914,7.8948935],[-9.1968046,7.8940701],[-9.1957772,7.8925066],[-9.1952915,7.8907766],[-9.1954783,7.8891298],[-9.1973062,7.8857806],[-9.1983451,7.8855054],[-9.1994686,7.8857806],[-9.2006283,7.8861995],[-9.2014861,7.8864268],[-9.2020659,7.8859841],[-9.2022351,7.8857418],[-9.2023468,7.8854067],[-9.2026277,7.8850507],[-9.2029025,7.8846857],[-9.2035186,7.8839079],[-9.2039596,7.8833455],[-9.2042223,7.8829386],[-9.2045304,7.8824719],[-9.2047569,7.8820112],[-9.2051012,7.881392],[-9.205373,7.8808774],[-9.2057052,7.8804137],[-9.2059982,7.879956],[-9.2063273,7.8794295],[-9.2065841,7.8789807],[-9.2069555,7.8782807],[-9.2073693,7.877443],[-9.2077951,7.8765904],[-9.2081092,7.8759831],[-9.2084263,7.87531],[-9.2085925,7.8748463],[-9.2087435,7.874574],[-9.2090364,7.874221],[-9.2093505,7.87385],[-9.2100059,7.873153],[-9.2107247,7.8725576],[-9.2115613,7.8720909],[-9.2123194,7.8715224],[-9.2175302,7.8686171],[-9.2235425,7.8636186],[-9.2256898,7.8593644],[-9.2302513,7.8568983],[-9.2306699,7.8566402],[-9.2312379,7.8564878],[-9.231712,7.8564625],[-9.2319939,7.8562509],[-9.2321861,7.8559336],[-9.2325107,7.8558193],[-9.2330532,7.8557516],[-9.2334846,7.8555486],[-9.2339074,7.8553116],[-9.2342704,7.8552016],[-9.234689,7.855282],[-9.2351717,7.8551255],[-9.2355561,7.8549689],[-9.2358337,7.854677],[-9.2358892,7.8543892],[-9.2355902,7.8542242],[-9.2353052,7.8540583],[-9.2354066,7.8537588],[-9.2356586,7.8535007],[-9.2360729,7.8530057],[-9.2364658,7.8526334],[-9.2367392,7.8522906],[-9.2370381,7.8520833],[-9.2371492,7.8519141],[-9.2373798,7.8517829],[-9.2375464,7.8514867],[-9.2378497,7.8508351],[-9.2380589,7.8504036],[-9.2382597,7.8498578],[-9.2386014,7.8493881],[-9.2389174,7.8490412],[-9.2392164,7.8486519],[-9.2394898,7.8484023],[-9.2401475,7.8483515],[-9.2407668,7.8482965],[-9.2413733,7.8483092],[-9.241715,7.8482626],[-9.2421635,7.8482203],[-9.2425009,7.8478903],[-9.2428511,7.8473149],[-9.2432825,7.8468748],[-9.2437737,7.8463544],[-9.2442563,7.8459397],[-9.2448073,7.8455378],[-9.2451063,7.8452585],[-9.2458196,7.8444546],[-9.2460716,7.8441838],[-9.2462894,7.8437141],[-9.2503408,7.8401295],[-9.2536004,7.8382999],[-9.2525304,7.8342641],[-9.254785,7.8325623],[-9.2575764,7.8316051],[-9.2605827,7.8332005],[-9.2628372,7.832775],[-9.2618709,7.8297969],[-9.2638035,7.828946],[-9.2670243,7.8257552],[-9.2715337,7.8242661],[-9.2774385,7.8219261],[-9.2802299,7.8226706],[-9.2823772,7.8201179],[-9.2864699,7.820386],[-9.2886578,7.8190485],[-9.2888989,7.8187427],[-9.2891722,7.8183281],[-9.2888989,7.8176849],[-9.2888818,7.8170248],[-9.288822,7.8162885],[-9.2889373,7.815823],[-9.2892406,7.815438],[-9.2893773,7.8148202],[-9.2897446,7.8146001],[-9.2902742,7.8144351],[-9.2906586,7.8141389],[-9.2912352,7.8136819],[-9.2919955,7.8134026],[-9.2926233,7.8129837],[-9.2928155,7.8125563],[-9.2932298,7.812294],[-9.2937594,7.8118539],[-9.2940243,7.8115154],[-9.2944428,7.8111938],[-9.2948699,7.8108003],[-9.2948827,7.8104067],[-9.2948827,7.809552],[-9.2948614,7.8091457],[-9.2945154,7.8086718],[-9.2943958,7.8081894],[-9.2936911,7.8081556],[-9.2932213,7.8080244],[-9.2928625,7.8076012],[-9.2926404,7.8072669],[-9.2925165,7.8068523],[-9.2926746,7.8063953],[-9.2928924,7.8061202],[-9.2932426,7.8059086],[-9.293825,7.8060029],[-9.2945423,7.8058226],[-9.2956844,7.8051331],[-9.2967557,7.8044471],[-9.3025115,7.8004227],[-9.3028336,7.7977635],[-9.3047661,7.7930832],[-9.3043903,7.7910089],[-9.3024041,7.7899984],[-9.3025115,7.7887219],[-9.3040146,7.7863286],[-9.3044977,7.7826055],[-9.3057861,7.7802121],[-9.3062692,7.7735104],[-9.3076649,7.7706915],[-9.3095437,7.7673406],[-9.3123352,7.7678725],[-9.3148045,7.7669151],[-9.3157708,7.7653194],[-9.3150192,7.7632982],[-9.3131941,7.7594686],[-9.3122278,7.7570218],[-9.3131941,7.7546815],[-9.3138383,7.7507453],[-9.3146972,7.7486177],[-9.3193137,7.7482986],[-9.3224273,7.7467028],[-9.3260776,7.742022],[-9.3285469,7.7413836],[-9.3361697,7.7468092],[-9.3349887,7.7508517],[-9.3358476,7.752873],[-9.3370286,7.7529794],[-9.3392832,7.7489369],[-9.3418599,7.7481922],[-9.3423967,7.7497879],[-9.3463691,7.7513836],[-9.3492241,7.7464729],[-9.352878,7.7521506],[-9.353568,7.7529206],[-9.354773,7.7535456],[-9.356418,7.7538456],[-9.357402,7.7545436],[-9.357762,7.7556026],[-9.358155,7.7572466],[-9.35895,7.7591106],[-9.360077,7.7603566],[-9.3611,7.7606896],[-9.361637,7.7628076],[-9.3617397,7.7634263],[-9.3619385,7.7651144],[-9.3608755,7.7654384],[-9.3599215,7.7659444],[-9.3592955,7.7665614],[-9.3591435,7.7676554],[-9.3593925,7.7689334],[-9.3599685,7.7706504],[-9.3606565,7.7718944],[-9.3602815,7.7735344],[-9.3602375,7.7749204],[-9.3605095,7.7785694],[-9.3614175,7.7798504],[-9.3621845,7.7801464],[-9.3631715,7.7802234],[-9.3646025,7.7795374],[-9.3663655,7.7783784],[-9.3676865,7.7778364],[-9.3682695,7.7782044],[-9.3681175,7.7792614],[-9.3674115,7.7812284],[-9.3673285,7.7829424],[-9.3673945,7.7842564],[-9.3673845,7.7860434],[-9.3670855,7.7871734],[-9.3666775,7.7881204],[-9.3666715,7.7893234],[-9.3669955,7.7901644],[-9.3679055,7.7910074],[-9.3684495,7.7919584],[-9.3684035,7.7937094],[-9.3691705,7.7939684],[-9.3695705,7.7943354],[-9.3692735,7.7952094],[-9.3695945,7.7965974],[-9.3700645,7.7977304],[-9.3706095,7.7984624],[-9.3738285,7.7986594],[-9.3751385,7.8001614],[-9.3754255,7.8010384],[-9.3754545,7.8024974],[-9.3751915,7.8037734],[-9.3758465,7.8043604],[-9.3769795,7.8047664],[-9.3781125,7.8049174],[-9.3786545,7.8061604],[-9.3785355,7.8079844],[-9.3785655,7.8090424],[-9.3791105,7.8097374],[-9.3803905,7.8100354],[-9.3817825,7.8096774],[-9.3830695,7.8086614],[-9.3855415,7.8050974],[-9.3860935,7.8044434],[-9.3886565,7.8043094],[-9.3896095,7.8040944],[-9.3915185,7.8028634],[-9.3924015,7.8020284],[-9.3936825,7.8021434],[-9.3945925,7.8030594],[-9.3958635,7.8047434],[-9.3973555,7.8063184],[-9.3978605,7.8076714],[-9.3981425,7.8096054],[-9.3986135,7.8106294],[-9.3998525,7.8115474],[-9.4008355,7.8124634],[-9.4011945,7.8136694],[-9.4011505,7.8151284],[-9.4007675,7.8181544],[-9.4008625,7.8208904],[-9.4014415,7.8221704],[-9.4023835,7.8239254],[-9.4030026,7.8243664],[-9.4049806,7.8241564],[-9.4058566,7.8245984],[-9.4069125,7.8256244],[-9.4080365,7.8275634],[-9.4091255,7.8291734],[-9.4099995,7.8300524],[-9.4110966,7.8301674],[-9.4123415,7.8299904],[-9.4132875,7.8311614],[-9.4157036,7.8310264],[-9.4164315,7.8318324],[-9.4166446,7.8329644],[-9.4166485,7.8389474],[-9.4167446,7.8414654],[-9.4172476,7.8431824],[-9.4182645,7.8446824],[-9.4194296,7.8457814],[-9.4215106,7.8468124],[-9.4222036,7.8472904],[-9.4231796,7.8494834],[-9.4237976,7.8502154],[-9.4262136,7.8502994],[-9.4267585,7.8509954],[-9.4273756,7.8519094],[-9.4282086,7.8535554],[-9.4284556,7.8553434],[-9.4288476,7.8573524],[-9.4289886,7.8583374],[-9.4300116,7.8586344],[-9.4315496,7.8584584],[-9.4321666,7.8595554],[-9.4322716,7.8603954],[-9.4321156,7.8620724],[-9.4322926,7.8633134],[-9.4329426,7.8648494],[-9.4324926,7.8668894],[-9.4324496,7.8680934],[-9.4326976,7.8695544],[-9.4331676,7.8706504],[-9.4330896,7.8715984],[-9.4322796,7.8724344],[-9.4316526,7.8733794],[-9.4312426,7.8747644],[-9.4313456,7.8760414],[-9.4319616,7.8770294],[-9.4331316,7.8773264],[-9.4351826,7.8771164],[-9.4356566,7.8775204],[-9.4364466,7.8803694],[-9.4365136,7.8814634],[-9.4372016,7.8828534],[-9.4382176,7.8845724],[-9.4383066,7.8883664],[-9.4396116,7.8908534],[-9.4397146,7.8920574],[-9.4394176,7.8928224],[-9.4383116,7.8942404],[-9.4384906,7.8951164],[-9.4386626,7.8970144],[-9.4384006,7.8982174],[-9.4378076,7.8995274],[-9.4367746,7.9009454],[-9.4367676,7.9023324],[-9.4370156,7.9039014],[-9.4369706,7.9055064],[-9.4365966,7.9069284],[-9.4350806,7.9096204],[-9.4343606,7.9143234],[-9.4352315,7.9157134],[-9.4366195,7.9162304],[-9.4377515,7.9167104],[-9.4378475,7.9193734],[-9.4394875,7.9207674],[-9.4402145,7.9216094],[-9.4407205,7.9228514],[-9.4408985,7.9238014],[-9.4409275,7.9252244],[-9.4400395,7.9269344],[-9.4394105,7.9282814],[-9.4394415,7.9292664],[-9.4398035,7.9301074],[-9.4424285,7.9320524],[-9.4431185,7.9331134],[-9.4435115,7.9349034],[-9.4436475,7.9368374],[-9.4429725,7.9398254],[-9.4424905,7.9409544],[-9.4417895,7.9420454],[-9.4408325,7.9429894],[-9.4383315,7.9450214],[-9.4378485,7.9464424],[-9.4366665,7.9484074],[-9.4364385,7.9499384],[-9.4370145,7.9516924],[-9.4377025,7.9531174],[-9.4377975,7.9559274],[-9.4384875,7.9569154],[-9.4413655,7.9596274],[-9.4421285,7.9607984],[-9.4423435,7.9615654],[-9.4421555,7.9625134],[-9.4416365,7.9636784],[-9.4416655,7.9651744],[-9.4420935,7.9672914],[-9.4421565,7.9691164],[-9.4418945,7.9701724],[-9.4413765,7.9711554],[-9.4411895,7.9719574],[-9.4425645,7.9751004],[-9.4425935,7.9764874],[-9.4422955,7.9773614],[-9.4413745,7.9784154],[-9.4404875,7.9799074],[-9.4401515,7.9812554],[-9.4389215,7.9852994],[-9.4382915,7.9866464],[-9.4375885,7.9879934],[-9.4358215,7.9898094],[-9.4347915,7.9906804],[-9.4339805,7.9916984],[-9.4333525,7.9926804],[-9.4325755,7.9942094],[-9.4318015,7.9952634],[-9.4306965,7.9964994],[-9.4298155,7.9969334],[-9.4282025,7.9972904],[-9.4257115,7.9974984],[-9.4225995,8.0001564],[-9.4217295,8.0013584],[-9.4209896,8.0026884],[-9.4207176,8.0028954],[-9.4200816,8.0035934],[-9.4187446,8.0047304],[-9.4184716,8.0050534],[-9.4184066,8.0058284],[-9.4182906,8.0063454],[-9.4180436,8.0068624],[-9.4173556,8.0081024],[-9.4168236,8.0088774],[-9.4161876,8.0095624],[-9.4158636,8.0102334],[-9.4155526,8.0121964],[-9.4151106,8.0131014],[-9.4149296,8.0133724],[-9.4146696,8.0135794],[-9.4140986,8.0137084],[-9.4129686,8.0137354],[-9.4122416,8.0140714],[-9.4111906,8.0147304],[-9.4105276,8.0150414],[-9.4100476,8.0153904],[-9.4084116,8.0167344],[-9.4068536,8.0178334],[-9.4064516,8.0180274],[-9.4060366,8.0184274],[-9.4057506,8.0187764],[-9.4053226,8.0193964],[-9.4050756,8.0199004],[-9.4047256,8.0203394],[-9.4047386,8.0210624],[-9.4053626,8.0256594],[-9.4052976,8.0261764],[-9.4056616,8.0263044],[-9.4060906,8.0265754],[-9.4082076,8.0281884],[-9.4085706,8.0284984],[-9.4087266,8.0287434],[-9.4087916,8.0291434],[-9.4087656,8.0296084],[-9.4085196,8.0306154],[-9.4084936,8.0314294],[-9.4083766,8.0319464],[-9.4081566,8.0321654],[-9.4079486,8.0324624],[-9.4079096,8.0329404],[-9.4080006,8.0335084],[-9.4081306,8.0337924],[-9.4080266,8.0341284],[-9.4081436,8.0342964],[-9.4080786,8.0345804],[-9.4077936,8.0353164],[-9.4073266,8.0359624],[-9.4068326,8.0369444],[-9.4064956,8.0379904],[-9.4062756,8.0395404],[-9.4062626,8.0407024],[-9.4063666,8.0410894],[-9.4063536,8.0418004],[-9.4064576,8.0424324],[-9.4064456,8.0438534],[-9.4061986,8.0450024],[-9.4060426,8.0454414],[-9.4059396,8.0461004],[-9.4056796,8.0471724],[-9.4055886,8.0477274],[-9.4055636,8.0484124],[-9.4057196,8.0496904],[-9.4058756,8.0501554],[-9.4061616,8.0506974],[-9.4065116,8.0511874],[-9.4072136,8.0520134],[-9.4075126,8.0525294],[-9.4077586,8.0528004],[-9.4081616,8.0529554],[-9.4085516,8.0531874],[-9.4093696,8.0539494],[-9.4100446,8.0548394],[-9.4103696,8.0553424],[-9.4111366,8.0562464],[-9.4113176,8.0565814],[-9.4115776,8.0572784],[-9.4115656,8.0582864],[-9.4114616,8.0587514],[-9.4113186,8.0590864],[-9.4103186,8.0601854],[-9.4094106,8.0609094],[-9.4100416,8.0608624],[-9.4107256,8.0609834],[-9.4117066,8.0614094],[-9.4126366,8.0622114],[-9.4136676,8.0628504],[-9.4143216,8.0630934],[-9.4157826,8.0635094],[-9.4166606,8.0635794],[-9.4173656,8.0636904],[-9.4177946,8.0638324],[-9.4191016,8.0643494],[-9.4199396,8.0648064],[-9.4201536,8.0650194],[-9.4210116,8.0649984],[-9.4221046,8.0647024],[-9.4227376,8.0644184],[-9.4245866,8.0633804],[-9.4253626,8.0630044],[-9.4267716,8.0624654],[-9.4273536,8.0623734],[-9.4279156,8.0622204],[-9.4283746,8.0619964],[-9.4290896,8.0615084],[-9.4296616,8.0609694],[-9.4300086,8.0607154],[-9.4303766,8.0605524],[-9.4312136,8.0603594],[-9.4328576,8.0592514],[-9.4333276,8.0590474],[-9.4350846,8.0588124],[-9.4356566,8.0587104],[-9.4361566,8.0585674],[-9.4370446,8.0580694],[-9.4375456,8.0576124],[-9.4382906,8.0566974],[-9.4387706,8.0562704],[-9.4391896,8.0559854],[-9.4400876,8.0556504],[-9.4426306,8.0552514],[-9.4431716,8.0550894],[-9.4436006,8.0548854],[-9.4446526,8.0541534],[-9.4454696,8.0534014],[-9.4460206,8.0530554],[-9.4462866,8.0529234],[-9.4470626,8.0526894],[-9.4479306,8.0523534],[-9.4484306,8.0520684],[-9.4488596,8.0519974],[-9.4493196,8.0517934],[-9.4505346,8.0510714],[-9.4509536,8.0509694],[-9.4517496,8.0504914],[-9.4524236,8.0501664],[-9.4530566,8.0497794],[-9.4535266,8.0494134],[-9.4539956,8.0489464],[-9.4547106,8.0479804],[-9.4548736,8.0475744],[-9.4550366,8.0458374],[-9.4559956,8.0436934],[-9.4563326,8.0433784],[-9.4572826,8.0426264],[-9.4577006,8.0424124],[-9.4582416,8.0422694],[-9.4589466,8.0422794],[-9.4593756,8.0424314],[-9.4597746,8.0427254],[-9.4601826,8.0431314],[-9.4608066,8.0443704],[-9.4613066,8.0449894],[-9.4613896,8.0455484],[-9.4612186,8.0459614],[-9.4612186,8.0463754],[-9.4617936,8.0473344],[-9.4618676,8.0477964],[-9.4618546,8.0481364],[-9.4616236,8.0489024],[-9.4616476,8.0499354],[-9.4615746,8.0502384],[-9.4610616,8.0514664],[-9.4606226,8.0521594],[-9.4603166,8.0524634],[-9.4593026,8.0531574],[-9.4587776,8.0536434],[-9.4576786,8.0544954],[-9.4572506,8.0546414],[-9.4564806,8.0553954],[-9.4555646,8.0567574],[-9.4550766,8.0581554],[-9.4546126,8.0586904],[-9.4537576,8.0594074],[-9.4533546,8.0599184],[-9.4526336,8.0612194],[-9.4525116,8.0616204],[-9.4524386,8.0621434],[-9.4516936,8.0634314],[-9.4511806,8.0640524],[-9.4499716,8.0653654],[-9.4494946,8.0661554],[-9.4492506,8.0664714],[-9.4482976,8.0674084],[-9.4475896,8.0682354],[-9.4475766,8.0684294],[-9.4476996,8.0692924],[-9.4476756,8.0695234],[-9.4472236,8.0704104],[-9.4467106,8.0710064],[-9.4454766,8.0717124],[-9.4453666,8.0718944],[-9.4452076,8.0723324],[-9.4450366,8.0733534],[-9.4444626,8.0743254],[-9.4442546,8.0745684],[-9.4438156,8.0757114],[-9.4432296,8.0775104],[-9.4428756,8.0784224],[-9.4424476,8.0790544],[-9.4418006,8.0797714],[-9.4415686,8.0801124],[-9.4413606,8.0805864],[-9.4409096,8.0821424],[-9.4408366,8.0831024],[-9.4408976,8.0835154],[-9.4410566,8.0839894],[-9.4413136,8.0842194],[-9.4416916,8.0844864],[-9.4421326,8.0847174],[-9.4436236,8.0853724],[-9.4443326,8.0857364],[-9.4451756,8.0863674],[-9.4457256,8.0870964],[-9.4459096,8.0874604],[-9.4460196,8.0878254],[-9.4464236,8.0885294],[-9.4467536,8.0889544],[-9.4476696,8.0896224],[-9.4478416,8.0899384],[-9.4479516,8.0903634],[-9.4479636,8.0908974],[-9.4478296,8.0914444],[-9.4473776,8.0926364],[-9.4470726,8.0931344],[-9.4467546,8.0940824],[-9.4467556,8.0949694],[-9.4469146,8.0953344],[-9.4472936,8.0958564],[-9.4476606,8.0963304],[-9.4480396,8.0967304],[-9.4485286,8.0970824],[-9.4500196,8.0979194],[-9.4503746,8.0982234],[-9.4505816,8.0986004],[-9.4509856,8.0997294],[-9.4511936,8.1001794],[-9.4514626,8.1006284],[-9.4519396,8.1012964],[-9.4531256,8.1031544],[-9.4535176,8.1034944],[-9.4539936,8.1040654],[-9.4541656,8.1043564],[-9.4543856,8.1050254],[-9.4545696,8.1062404],[-9.4549236,8.1073214],[-9.4551076,8.1080504],[-9.4553156,8.1085724],[-9.4560126,8.1098604],[-9.4563436,8.1109534],[-9.4565516,8.1121924],[-9.4566496,8.1124604],[-9.4566736,8.1130434],[-9.4563686,8.1135174],[-9.4556236,8.1141014],[-9.4550366,8.1141994],[-9.4545846,8.1143694],[-9.4541936,8.1145404],[-9.4536806,8.1148684],[-9.4533256,8.1151114],[-9.4528126,8.1155984],[-9.4527156,8.1159634],[-9.4529596,8.1161454],[-9.4537906,8.1165944],[-9.4541576,8.1168614],[-9.4547446,8.1174194],[-9.4549276,8.1178084],[-9.4552706,8.1189134],[-9.4556746,8.1195454],[-9.4559186,8.1201894],[-9.4559196,8.1205784],[-9.4556996,8.1223154],[-9.455656,8.1229785],[-9.4556516,8.1230454],[-9.4554316,8.1238234],[-9.4552846,8.1241634],[-9.4543566,8.1257194],[-9.4540696,8.1261303],[-9.4537706,8.1265584],[-9.4527196,8.1275804],[-9.4507396,8.1286514],[-9.4504309,8.128951],[-9.4502636,8.1291134],[-9.4499946,8.1295144],[-9.4497386,8.1300124],[-9.4495306,8.1306084],[-9.4492866,8.1313504],[-9.4490056,8.1324434],[-9.4489816,8.1328324],[-9.4490546,8.1331604],[-9.4491896,8.1335004],[-9.4493606,8.1336954],[-9.4503266,8.1342534],[-9.4508156,8.1344834],[-9.4514876,8.1342524],[-9.4534916,8.1332424],[-9.4543106,8.1332294],[-9.4548606,8.1333014],[-9.4562666,8.1336894],[-9.4568776,8.1337254],[-9.4579656,8.1345754],[-9.4583566,8.1347694],[-9.4587606,8.1348784],[-9.4602396,8.1349864],[-9.4607896,8.1352044],[-9.4612046,8.1352524],[-9.4623176,8.1355314],[-9.4626716,8.1357014],[-9.4633816,8.1363564],[-9.4637116,8.1368184],[-9.4640296,8.1376924],[-9.4640056,8.1391264],[-9.4637856,8.1397584],[-9.4633826,8.1402084],[-9.4629796,8.1404404],[-9.4624176,8.1406594],[-9.4620266,8.1407084],[-9.4613906,8.1407084],[-9.4613691,8.1412606],[-9.4594941,8.1598906],[-9.4594221,8.1616646],[-9.4622511,8.1764996],[-9.4625331,8.1770336],[-9.4629121,8.1771436],[-9.4633391,8.1770816],[-9.4645251,8.1767166],[-9.4649531,8.1765576],[-9.4655031,8.1762416],[-9.4656741,8.1761926],[-9.4659921,8.1762416],[-9.4667251,8.1764716],[-9.4671651,8.1769576],[-9.4673861,8.1776496],[-9.4673621,8.1789986],[-9.4674231,8.1793026],[-9.4675701,8.1795206],[-9.4681811,8.1799696],[-9.4689511,8.1798356],[-9.4705891,8.1797736],[-9.4713841,8.1796506],[-9.4727771,8.1793336],[-9.4731071,8.1791876],[-9.4734501,8.1791026],[-9.4737551,8.1788836],[-9.4740851,8.1787376],[-9.4750021,8.1784816],[-9.4759181,8.1784076],[-9.4761631,8.1784436],[-9.4764321,8.1785896],[-9.4770431,8.1792206],[-9.4771901,8.1795366],[-9.4774591,8.1798276],[-9.4777651,8.1800216],[-9.4782051,8.1802646],[-9.4793301,8.1807376],[-9.4797461,8.1808956],[-9.4800881,8.1809196],[-9.4803451,8.1808706],[-9.4817131,8.1800426],[-9.4822631,8.1797626],[-9.4845611,8.1788496],[-9.4850871,8.1785936],[-9.4855141,8.1782526],[-9.4858071,8.1779006],[-9.4860271,8.1774266],[-9.4861371,8.1770856],[-9.4861401,8.1762246],[-9.4861981,8.1760866],[-9.4864001,8.1759256],[-9.4867341,8.1757836],[-9.4884151,8.1758326],[-9.4894791,8.1760436],[-9.4909981,8.1760316],[-9.4921011,8.1755076],[-9.4929831,8.1754556],[-9.4934691,8.1755056],[-9.4938131,8.1756966],[-9.4939761,8.1772166],[-9.4938041,8.1788476],[-9.4934711,8.1800366],[-9.4934921,8.1811136],[-9.4934411,8.1816266],[-9.4933101,8.1819896],[-9.4933001,8.1825026],[-9.4933711,8.1830666],[-9.4936451,8.1841336],[-9.4937981,8.1856836],[-9.4939301,8.1861466],[-9.4941321,8.1864286],[-9.4947401,8.1869006],[-9.4950441,8.1869206],[-9.4964621,8.1865566],[-9.4972821,8.1862946],[-9.4987911,8.1860106],[-9.4999451,8.1855566],[-9.5006171,8.1853566],[-9.5013731,8.1851966],[-9.5015561,8.1850026],[-9.5018531,8.1848656],[-9.5028611,8.1845446],[-9.5033421,8.1844986],[-9.5036971,8.1843846],[-9.5055181,8.1844386],[-9.5065371,8.1838686],[-9.5070061,8.1837306],[-9.5077851,8.1837066],[-9.5081971,8.1837406],[-9.5095611,8.1840356],[-9.5116571,8.1849326],[-9.5125751,8.1861166],[-9.5128961,8.1863776],[-9.5130681,8.1865946],[-9.5133321,8.1872086],[-9.5139741,8.1879256],[-9.5143411,8.1881986],[-9.5147881,8.1883696],[-9.5152571,8.1886536],[-9.5154991,8.1893256],[-9.5155221,8.1898836],[-9.5154431,8.1907606],[-9.5154791,8.1919686],[-9.5156051,8.1929366],[-9.5158351,8.1937566],[-9.5158011,8.1941556],[-9.5154471,8.1947606],[-9.5147841,8.1955356],[-9.5146121,8.1956386],[-9.5144631,8.1956156],[-9.5136281,8.1969616],[-9.5131481,8.1975546],[-9.5123471,8.1989116],[-9.5116041,8.2003136],[-9.5114791,8.2006666],[-9.5115371,8.2016586],[-9.5107251,8.2027076],[-9.5105881,8.2027416],[-9.5101411,8.2031296],[-9.5094431,8.2036096],[-9.5084701,8.2036216],[-9.5083321,8.2036676],[-9.5081831,8.2038046],[-9.5079891,8.2040216],[-9.5078861,8.2043066],[-9.5075901,8.2057996],[-9.5073721,8.2060956],[-9.5070181,8.2064266],[-9.5066401,8.2067006],[-9.5059071,8.2070206],[-9.5048771,8.2077736],[-9.5043511,8.2084806],[-9.5039401,8.2093356],[-9.5037121,8.2103156],[-9.5037231,8.2105776],[-9.5038041,8.2108396],[-9.5043421,8.2112036],[-9.5052821,8.2113966],[-9.5055001,8.2115666],[-9.5056721,8.2117836],[-9.5057521,8.2124206],[-9.5056041,8.2127626],[-9.5039001,8.2154536],[-9.5029971,8.2176546],[-9.5030211,8.2182006],[-9.5033771,8.2189066],[-9.5035831,8.2191006],[-9.5044541,8.2193156],[-9.5047291,8.2194976],[-9.5052681,8.2200896],[-9.5053831,8.2204086],[-9.5054171,8.2206476],[-9.5053491,8.2210006],[-9.5052801,8.2212176],[-9.5047541,8.2221976],[-9.5045721,8.2229726],[-9.5048011,8.2232456],[-9.5054901,8.2242816],[-9.5058451,8.2249646],[-9.5061891,8.2253976],[-9.5064301,8.2256136],[-9.5066021,8.2260696],[-9.5065571,8.2267756],[-9.5063641,8.2276536],[-9.5061011,8.2284056],[-9.5053921,8.2298076],[-9.5052551,8.2299676],[-9.5043621,8.2307316],[-9.5039621,8.2312226],[-9.5030821,8.2330236],[-9.5019031,8.2347566],[-9.5016291,8.2350646],[-9.5010681,8.2355216],[-9.5001301,8.2364566],[-9.4999931,8.2367766],[-9.4998791,8.2373916],[-9.4998911,8.2379836],[-9.4999711,8.2382346],[-9.5002351,8.2385306],[-9.5004071,8.2388376],[-9.5006361,8.2391106],[-9.5008661,8.2393046],[-9.5011521,8.2394176],[-9.5017361,8.2393376],[-9.5020571,8.2392236],[-9.5025721,8.2391886],[-9.5028361,8.2392676],[-9.5034091,8.2393016],[-9.5035691,8.2394486],[-9.5039131,8.2394146],[-9.5042341,8.2396076],[-9.5044971,8.2396306],[-9.5049561,8.2398916],[-9.5067771,8.2402426],[-9.5075451,8.2404806],[-9.5085081,8.2409236],[-9.5101691,8.2415026],[-9.5112001,8.2417066],[-9.5117501,8.2417056],[-9.5122311,8.2415686],[-9.5122201,8.2417396],[-9.5113281,8.2430736],[-9.5111681,8.2434956],[-9.5108131,8.2442026],[-9.5106071,8.2443846],[-9.5104241,8.2444756],[-9.5096571,8.2446596],[-9.5091991,8.2448766],[-9.5083061,8.2458116],[-9.5079061,8.2464506],[-9.5074031,8.2468496],[-9.5071851,8.2468956],[-9.5063721,8.2469086],[-9.5056161,8.2472506],[-9.5053991,8.2474336],[-9.5050331,8.2479466],[-9.5046901,8.2486076],[-9.5046331,8.2490406],[-9.5044041,8.2495996],[-9.5043361,8.2500556],[-9.5043721,8.2509296],[-9.5042801,8.2512276],[-9.5040881,8.2515356],[-9.5036041,8.2520906],[-9.5033021,8.2523386],[-9.5018941,8.2531976],[-9.5013411,8.2535836],[-9.5008371,8.2541296],[-9.5005361,8.2542766],[-9.4998341,8.2544726],[-9.4994101,8.2550186],[-9.4986651,8.2556626],[-9.4980221,8.2560076],[-9.4976801,8.2562546],[-9.4973781,8.2565716],[-9.4966911,8.2575546],[-9.4960531,8.2587176],[-9.4958611,8.2589956],[-9.4942681,8.2606906],[-9.4932211,8.2615326],[-9.4928281,8.2619186],[-9.4924951,8.2623256],[-9.4916261,8.2636066],[-9.4909711,8.2642306],[-9.4902281,8.2645956],[-9.4898881,8.2645736],[-9.4895361,8.2648416],[-9.4893641,8.2650296],[-9.4891011,8.2655866],[-9.4889711,8.2670006],[-9.4889901,8.2673196],[-9.4890681,8.2675596],[-9.4892071,8.2677896],[-9.4894861,8.2679506],[-9.4896651,8.2681706],[-9.4897951,8.2713406],[-9.4902481,8.2726886],[-9.4905981,8.2743146],[-9.4909341,8.2749946],[-9.4911031,8.2751446],[-9.4913231,8.2752256],[-9.4915541,8.2752166],[-9.4923461,8.2750316],[-9.4940281,8.2750806],[-9.4944481,8.2751926],[-9.4947271,8.2753636],[-9.4950051,8.2757236],[-9.4955821,8.2762756],[-9.4960211,8.2765366],[-9.4967401,8.2768696],[-9.4971901,8.2770316],[-9.4977201,8.2771036],[-9.4999801,8.2775646],[-9.5006811,8.2775286],[-9.5011301,8.2778596],[-9.5016971,8.2784416],[-9.5020891,8.2798886],[-9.5023851,8.2805576],[-9.5025801,8.2814156],[-9.5023811,8.2827106],[-9.5024371,8.2833986],[-9.5023241,8.2839456],[-9.5019681,8.2848006],[-9.5014311,8.2857346],[-9.5012191,8.2860126],[-9.5011781,8.2861916],[-9.5011871,8.2864416],[-9.5013161,8.2866516],[-9.5018341,8.2869926],[-9.5020231,8.2872226],[-9.5021511,8.2875026],[-9.5021891,8.2878816],[-9.5021571,8.2882106],[-9.5020451,8.2884486],[-9.5017021,8.2888556],[-9.5013601,8.2891126],[-9.5008181,8.2894186],[-9.5004431,8.2900146],[-9.5001111,8.2903916],[-9.4994071,8.2908866],[-9.4976191,8.2933586],[-9.4972751,8.2939146],[-9.4964221,8.2957436],[-9.4962491,8.2961616],[-9.4960341,8.2969676],[-9.4956291,8.2976126],[-9.4954971,8.2979116],[-9.4954451,8.2982996],[-9.4956191,8.2992576],[-9.4956741,8.3033036],[-9.4955881,8.3042996],[-9.4957151,8.3046896],[-9.4960241,8.3049896],[-9.4967031,8.3052426],[-9.4976961,8.3049896],[-9.4984951,8.3053526],[-9.4992961,8.3054166],[-9.4999481,8.3053106],[-9.5013691,8.3053476],[-9.5022001,8.3054816],[-9.5030131,8.3058656],[-9.5032901,8.3060856],[-9.5036321,8.3062306],[-9.5070281,8.3062266],[-9.5073601,8.3062836],[-9.5083521,8.3067296],[-9.5101871,8.3069376],[-9.5104521,8.3070486],[-9.5109471,8.3074586],[-9.5114961,8.3081886],[-9.5117261,8.3085636],[-9.5121441,8.3089956],[-9.5127841,8.3091646],[-9.5144051,8.3100866],[-9.5147108,8.3103107],[-9.5147681,8.3103526],[-9.5151851,8.3108506],[-9.5153041,8.3112696],[-9.5156201,8.3120306],[-9.5158731,8.3123736],[-9.5161701,8.3126386],[-9.5164011,8.3127946],[-9.5177031,8.3133736],[-9.5182201,8.3137286],[-9.5184501,8.3141376],[-9.5185211,8.3151726],[-9.5189671,8.3164846],[-9.5191323,8.3168527],[-9.5187821,8.3183436],[-9.5185266,8.3188689],[-9.5175853,8.3198673],[-9.5160921,8.3211353],[-9.5154023,8.3215759],[-9.5146492,8.3217217],[-9.513278,8.321836],[-9.5121174,8.3218685],[-9.510023,8.3225928],[-9.5099858,8.3232517],[-9.5104128,8.3260108],[-9.5103107,8.3263458],[-9.5099347,8.3268776],[-9.508712,8.3279646],[-9.5085112,8.3283149],[-9.5079309,8.3289939],[-9.5069778,8.3296435],[-9.5059891,8.3297559],[-9.5044306,8.3303662],[-9.5036057,8.3311282],[-9.5029211,8.3314472],[-9.500361,8.3330025],[-9.4975658,8.3360814],[-9.496776,8.337113],[-9.4956869,8.3380732],[-9.4948641,8.3387353],[-9.4929586,8.3390432],[-9.4909691,8.3389414],[-9.4897093,8.3391786],[-9.4876658,8.3434634],[-9.4866497,8.3443872],[-9.4858641,8.3445644],[-9.4850619,8.344456],[-9.4812008,8.3420314],[-9.4809571,8.3408165],[-9.4807384,8.3403612],[-9.4808599,8.3397221],[-9.4806404,8.3395492],[-9.4803187,8.3395869],[-9.4798867,8.3400037],[-9.4795778,8.3404729],[-9.4792144,8.3417608],[-9.4785559,8.3442004],[-9.4784143,8.3457809],[-9.4775691,8.3485582],[-9.4777998,8.3493401],[-9.4785964,8.3511725],[-9.4789576,8.3513057],[-9.4792106,8.3517654],[-9.4793086,8.3528327],[-9.4795573,8.3538889],[-9.4801366,8.3545528],[-9.480501,8.3548143],[-9.480692,8.3555599],[-9.4810843,8.3555956],[-9.4815437,8.3552732],[-9.4819721,8.3551207],[-9.4822354,8.3551258],[-9.4824819,8.3552082],[-9.4828179,8.3555613],[-9.4827923,8.3560958],[-9.4830442,8.3563486],[-9.4837158,8.3570889],[-9.4865773,8.3598658],[-9.4871723,8.3600395],[-9.4874679,8.3602883],[-9.4876077,8.3606046],[-9.4877775,8.360988],[-9.4878986,8.3612344],[-9.4879241,8.3618519],[-9.4877374,8.3622657],[-9.4875993,8.3625453],[-9.487727,8.3626644],[-9.4877032,8.3631227],[-9.4874215,8.3634067],[-9.487519,8.3637694],[-9.4878555,8.3640412],[-9.4881687,8.3641053],[-9.4884515,8.3639727],[-9.4888366,8.3638453],[-9.4890745,8.3636629],[-9.4898754,8.3630133],[-9.4907523,8.3631689],[-9.4913332,8.3632747],[-9.4914806,8.3636343],[-9.4916908,8.3645278],[-9.4916412,8.3650618],[-9.4915701,8.3654766],[-9.4916691,8.3656996],[-9.4921131,8.3658726],[-9.4945381,8.3660716],[-9.4952561,8.3660476],[-9.4958021,8.3659786],[-9.4963461,8.3660676],[-9.4966611,8.3661976],[-9.4970331,8.3665136],[-9.4971891,8.3667576],[-9.4972441,8.3670866],[-9.4972131,8.3675146],[-9.4969781,8.3683136],[-9.4960901,8.3703646],[-9.4958701,8.3710636],[-9.4957791,8.3718346],[-9.4958341,8.3723486],[-9.4960611,8.3727646],[-9.4963741,8.3730946],[-9.4968461,8.3734396],[-9.4970901,8.3735126],[-9.4975211,8.3734436],[-9.4988721,8.3730226],[-9.5002941,8.3730016],[-9.5020321,8.3728106],[-9.5035391,8.3728616],[-9.5041121,8.3730216],[-9.5054291,8.3735436],[-9.5064031,8.3738196],[-9.5073741,8.3746536],[-9.5080601,8.3751716],[-9.5093471,8.3759356],[-9.5105621,8.3768556],[-9.5109481,8.3770576],[-9.5120941,8.3774496],[-9.5126951,8.3777676],[-9.5134091,8.3783566],[-9.5135221,8.3786576],[-9.5138501,8.3790016],[-9.5145081,8.3793626],[-9.5150961,8.3794656],[-9.5155841,8.3795106],[-9.5158711,8.3793986],[-9.5176511,8.3794506],[-9.5185701,8.3793696],[-9.5189581,8.3792716],[-9.5198231,8.3787336],[-9.5207291,8.3784246],[-9.5211181,8.3781976],[-9.5216501,8.3779726],[-9.5222681,8.3778466],[-9.5229721,8.3778226],[-9.5233301,8.3779526],[-9.5248441,8.3792316],[-9.5253301,8.3795486],[-9.5258311,8.3797796],[-9.5278111,8.3799186],[-9.5283981,8.3801366],[-9.5297481,8.3800866],[-9.5308551,8.3798206],[-9.5318771,8.3792546],[-9.5328401,8.3790036],[-9.5330991,8.3790046],[-9.5345361,8.3787546],[-9.5357401,8.3789326],[-9.5359701,8.3788916],[-9.5361871,8.3787206],[-9.5364311,8.3786796],[-9.5369901,8.3787826],[-9.5373191,8.3790696],[-9.5393331,8.3805376],[-9.5397771,8.3807396],[-9.5403791,8.3808566],[-9.5412281,8.3805046],[-9.5416321,8.3802206],[-9.5423541,8.3795676],[-9.5433611,8.3791586],[-9.5445301,8.3788986],[-9.5453291,8.3789836],[-9.5459601,8.3790016],[-9.5463031,8.3792456],[-9.5471331,8.3797076],[-9.5477631,8.3799966],[-9.5501835,8.3809961],[-9.5505411,8.3810966],[-9.5513581,8.3812576],[-9.5517301,8.3813736],[-9.5521171,8.3815616],[-9.5525171,8.3818356],[-9.5528731,8.3823516],[-9.5531131,8.3829096],[-9.5535451,8.3851116],[-9.5536861,8.3856116],[-9.5544541,8.3867726],[-9.5546371,8.3872456],[-9.5546031,8.3881446],[-9.5542381,8.3891716],[-9.5542481,8.3899426],[-9.5544181,8.3903436],[-9.5547591,8.3908736],[-9.5554301,8.3914056],[-9.5559591,8.3917506],[-9.5564601,8.3920246],[-9.5573191,8.3923866],[-9.5585541,8.3922786],[-9.5590291,8.3921526],[-9.5593891,8.3919686],[-9.5600071,8.3917436],[-9.5607251,8.3917476],[-9.5608641,8.3925056],[-9.5621431,8.3970106],[-9.5679371,8.4077526],[-9.5676751,8.4087206],[-9.5677481,8.4094176],[-9.5697961,8.4112396],[-9.5775851,8.4174086],[-9.5783691,8.4178126],[-9.5791721,8.4178426],[-9.5800701,8.4177196],[-9.5828581,8.4172156],[-9.5833951,8.4174646],[-9.5839821,8.4179606],[-9.5846811,8.4182956],[-9.5849451,8.4183656],[-9.5852751,8.4189786],[-9.5856221,8.4194226],[-9.5859541,8.4196966],[-9.5865161,8.4200396],[-9.5869921,8.4204076],[-9.5879971,8.4209316],[-9.5883791,8.4213156],[-9.5887071,8.4222776],[-9.5888681,8.4225336],[-9.5892421,8.4227996],[-9.5895651,8.4230986],[-9.5898261,8.4237626],[-9.5901301,8.4243346],[-9.5904521,8.4247776],[-9.5906821,8.4248636],[-9.5909121,8.4249246],[-9.5913911,8.4249016],[-9.5920671,8.4248036],[-9.5931811,8.4242986],[-9.5933441,8.4241046],[-9.5935001,8.4237986],[-9.5935821,8.4228986],[-9.5935411,8.4225576],[-9.5927781,8.4216106],[-9.5926941,8.4213036],[-9.5928441,8.4205056],[-9.5930271,8.4199626],[-9.5929651,8.4175056],[-9.5928741,8.4170036],[-9.5927061,8.4165526],[-9.5924941,8.4161516],[-9.5923941,8.4158196],[-9.5923881,8.4153686],[-9.5924671,8.4150036],[-9.5929751,8.4143006],[-9.5931141,8.4140376],[-9.5932781,8.4123476],[-9.5938211,8.4115086],[-9.5941381,8.4113826],[-9.5955331,8.4110156],[-9.5961321,8.4107556],[-9.5969571,8.4100536],[-9.5973761,8.4099366],[-9.5986831,8.4099266],[-9.5990781,8.4096906],[-9.5998021,8.4085806],[-9.6000011,8.4082076],[-9.6002071,8.4079966],[-9.6005411,8.4078956],[-9.6015591,8.4077656],[-9.6028231,8.4077546],[-9.6033461,8.4075446],[-9.6037741,8.4074276],[-9.6043821,8.4071426],[-9.6057771,8.4066646],[-9.6063421,8.4065146],[-9.6065831,8.4063376],[-9.6068831,8.4060326],[-9.6077611,8.4049326],[-9.6081401,8.4045516],[-9.6085351,8.4042396],[-9.6088081,8.4041466],[-9.6092871,8.4041576],[-9.6106701,8.4044116],[-9.6126171,8.4044636],[-9.6131631,8.4046286],[-9.6135981,8.4046986],[-9.6138881,8.4048106],[-9.6142801,8.4051096],[-9.6154341,8.4062976],[-9.6158771,8.4066566],[-9.6161751,8.4066926],[-9.6166281,8.4067286],[-9.6172521,8.4066556],[-9.6175611,8.4065376],[-9.6184111,8.4058286],[-9.6190441,8.4056866],[-9.6198641,8.4057596],[-9.6210241,8.4060626],[-9.6216201,8.4062866],[-9.6235941,8.4062546],[-9.6245951,8.4061486],[-9.6254341,8.4057706],[-9.6262391,8.4055536],[-9.6269311,8.4055656],[-9.6276561,8.4056966],[-9.6285261,8.4059566],[-9.6287901,8.4061106],[-9.6297381,8.4062256],[-9.6301981,8.4063896],[-9.6307021,8.4064346],[-9.6311211,8.4063436],[-9.6318171,8.4057516],[-9.6326251,8.4049316],[-9.6330621,8.4047126],[-9.6344711,8.4048046],[-9.6354301,8.4045206],[-9.6372751,8.4044956],[-9.6377541,8.4044136],[-9.6383401,8.4036086],[-9.6386491,8.4032696],[-9.6389411,8.4030246],[-9.6394891,8.4028066],[-9.6399951,8.4024866],[-9.6406211,8.4021916],[-9.6413821,8.4020516],[-9.6421441,8.4017576],[-9.6431291,8.4014476],[-9.6454121,8.4010256],[-9.6458831,8.4008586],[-9.6464421,8.4002486],[-9.6467531,8.3996636],[-9.6470021,8.3994276],[-9.6472181,8.3991306],[-9.6473741,8.3987316],[-9.6474791,8.3982736],[-9.6476511,8.3980536],[-9.6479601,8.3977746],[-9.6482021,8.3973586],[-9.6481431,8.3987356],[-9.6482421,8.3992296],[-9.6487651,8.4004056],[-9.6490961,8.4008746],[-9.6500721,8.4020186],[-9.6502231,8.4024696],[-9.6504421,8.4028786],[-9.6507561,8.4032886],[-9.6512661,8.4036986],[-9.6524421,8.4042996],[-9.6532111,8.4043296],[-9.6539971,8.4042996],[-9.6544421,8.4041566],[-9.6553481,8.4041956],[-9.6576501,8.4049126],[-9.6582211,8.4052126],[-9.6584841,8.4054526],[-9.6588401,8.4060826],[-9.6589131,8.4066696],[-9.6591621,8.4078956],[-9.6588691,8.4083696],[-9.6586511,8.4091596],[-9.6583401,8.4097356],[-9.6582771,8.4101946],[-9.6583601,8.4106376],[-9.6582981,8.4111296],[-9.6580131,8.4116126],[-9.6577031,8.4119596],[-9.6566571,8.4126776],[-9.6553281,8.4134356],[-9.6549931,8.4137656],[-9.6547581,8.4144106],[-9.6544951,8.4156336],[-9.6547541,8.4166976],[-9.6547281,8.4182446],[-9.6548531,8.4187806],[-9.6548671,8.4192476],[-9.6545401,8.4196456],[-9.6543091,8.4197556],[-9.6539061,8.4198556],[-9.6534101,8.4199206],[-9.6532041,8.4201066],[-9.6528931,8.4206746],[-9.6526931,8.4214046],[-9.6523371,8.4223636],[-9.6520361,8.4226516],[-9.6513991,8.4234046],[-9.6512011,8.4238026],[-9.6511731,8.4240576],[-9.6512891,8.4247636],[-9.6511481,8.4254266],[-9.6504751,8.4265626],[-9.6500451,8.4271206],[-9.6497281,8.4272976],[-9.6491461,8.4273716],[-9.6479441,8.4269826],[-9.6463241,8.4263116],[-9.6454451,8.4260946],[-9.6450611,8.4261016],[-9.6448211,8.4262196],[-9.6444771,8.4265406],[-9.6443051,8.4268116],[-9.6440101,8.4274816],[-9.6438121,8.4278206],[-9.6433571,8.4282016],[-9.6430551,8.4286166],[-9.6425881,8.4295236],[-9.6417391,8.4301826],[-9.6412671,8.4304606],[-9.6409661,8.4307476],[-9.6403931,8.4309486],[-9.6394161,8.4314626],[-9.6384561,8.4318406],[-9.6378561,8.4322456],[-9.6371271,8.4326076],[-9.6352041,8.4342976],[-9.6343971,8.4348976],[-9.6337021,8.4353186],[-9.6328521,8.4359856],[-9.6306351,8.4381596],[-9.6302911,8.4385316],[-9.6294041,8.4397596],[-9.6289831,8.4400806],[-9.6287001,8.4403686],[-9.6285601,8.4408526],[-9.6285111,8.4418466],[-9.6285691,8.4423056],[-9.6288711,8.4431576],[-9.6285871,8.4435726],[-9.6280511,8.4445896],[-9.6273521,8.4456656],[-9.6271771,8.4464726],[-9.6270471,8.4467616],[-9.6266241,8.4474476],[-9.6262801,8.4478286],[-9.6258141,8.4485826],[-9.6255731,8.4488446],[-9.6246041,8.4495026],[-9.6235111,8.4507556],[-9.6228581,8.4513816],[-9.6221651,8.4515396],[-9.6214391,8.4514506],[-9.6211231,8.4514576],[-9.6209511,8.4516266],[-9.6205971,8.4523646],[-9.6202531,8.4527456],[-9.6200811,8.4528296],[-9.6199911,8.4535596],[-9.6200211,8.4542486],[-9.6202581,8.4546836],[-9.6203591,8.4550326],[-9.6203541,8.4558736],[-9.6204121,8.4561976],[-9.6205301,8.4564186],[-9.6209381,8.4567616],[-9.6217841,8.4568416],[-9.6219711,8.4569876],[-9.6220291,8.4572086],[-9.6220271,8.4575576],[-9.6219391,8.4579396],[-9.6217051,8.4585416],[-9.6218641,8.4591546],[-9.6225461,8.4608416],[-9.6230721,8.4615916],[-9.6256711,8.4641806],[-9.6263191,8.4644906],[-9.6282391,8.4648826],[-9.6291821,8.4659416],[-9.6297411,8.4667096],[-9.6298591,8.4670076],[-9.6302911,8.4676126],[-9.6303561,8.4682846],[-9.6302171,8.4685226],[-9.6302051,8.4692616],[-9.6301501,8.4697716],[-9.6300271,8.4703576],[-9.6294461,8.4719186],[-9.6294501,8.4725816],[-9.6296531,8.4729316],[-9.6298911,8.4732126],[-9.6310351,8.4733636],[-9.6316921,8.4735286],[-9.6328281,8.4736866],[-9.6338021,8.4735986],[-9.6342891,8.4736606],[-9.6355271,8.4739556],[-9.636158,8.4741886],[-9.637163,8.4746356],[-9.637735,8.4747316],[-9.638599,8.4745576],[-9.639085,8.4748316],[-9.639657,8.4749026],[-9.639947,8.4750236],[-9.640229,8.4750416],[-9.64052,8.4749756],[-9.641223,8.4745796],[-9.641727,8.4745736],[-9.642351,8.4744656],[-9.64383,8.4743796],[-9.644224,8.4742376],[-9.6445931,8.4740016],[-9.6451401,8.4739356],[-9.6455521,8.4737766],[-9.6459451,8.4737696],[-9.6462341,8.4739326],[-9.6464651,8.4739596],[-9.646626,8.4741046],[-9.646831,8.4741826],[-9.647045,8.4741406],[-9.6471981,8.4743376],[-9.647617,8.4742626],[-9.647898,8.4743496],[-9.648495,8.4746496],[-9.649068,8.4745246],[-9.649437,8.4742206],[-9.6499691,8.4739006],[-9.6509191,8.4736586],[-9.6513381,8.4736356],[-9.6520381,8.4737746],[-9.6527911,8.4735996],[-9.6529871,8.4736516],[-9.653395,8.4740456],[-9.653642,8.4741396],[-9.654146,8.4741506],[-9.6544721,8.4739736],[-9.654461,8.4744156],[-9.654289,8.4746366],[-9.653868,8.4750246],[-9.653695,8.4752966],[-9.653659,8.4756866],[-9.653412,8.4770116],[-9.653383,8.4774966],[-9.653287,8.4779126],[-9.653132,8.4781416],[-9.652908,8.4783606],[-9.652591,8.4785886],[-9.652194,8.4791476],[-9.651944,8.4796656],[-9.651813,8.4801406],[-9.651622,8.4805566],[-9.651526,8.4809556],[-9.651179,8.4818296],[-9.651117,8.4821776],[-9.651005,8.4823296],[-9.650602,8.4826166],[-9.65018,8.4831336],[-9.649758,8.4837346],[-9.649464,8.4843366],[-9.6493591,8.4846596],[-9.649297,8.4851266],[-9.649302,8.4857556],[-9.649222,8.4861976],[-9.648972,8.4866636],[-9.648832,8.4871816],[-9.647545,8.4895726],[-9.647397,8.4900396],[-9.6469122,8.4908686],[-9.6470722,8.4911926],[-9.6476412,8.4917306],[-9.6480082,8.4919196],[-9.6488452,8.4919666],[-9.6494662,8.4924366],[-9.6499182,8.4926516],[-9.6501662,8.4926786],[-9.6509702,8.4924276],[-9.6517682,8.4919636],[-9.6521612,8.4918726],[-9.6525802,8.4918486],[-9.6532392,8.4916566],[-9.6550682,8.4916576],[-9.6555882,8.4919996],[-9.6558762,8.4922906],[-9.6564982,8.4927186],[-9.6568122,8.4930856],[-9.6569732,8.4933836],[-9.6571742,8.4939966],[-9.6577222,8.4953426],[-9.6582322,8.4958126],[-9.6585302,8.4959416],[-9.6594112,8.4957846],[-9.6602582,8.4957466],[-9.6606152,8.4960376],[-9.6608862,8.4963866],[-9.6616432,8.4969856],[-9.6621972,8.4972606],[-9.6623842,8.4974906],[-9.6624942,8.4977126],[-9.6625522,8.4979766],[-9.6630132,8.5011066],[-9.6632652,8.5017206],[-9.6636242,8.5017216],[-9.6644532,8.5018286],[-9.6658722,8.5017676],[-9.6664192,8.5016506],[-9.6671302,8.5013486],[-9.6675962,8.5006026],[-9.6681092,8.4990666],[-9.6683402,8.4990086],[-9.6771592,8.4947416],[-9.6787192,8.4939166],[-9.6812212,8.4927046],[-9.6819262,8.4919766],[-9.6853862,8.4892826],[-9.6869042,8.4882446],[-9.6892272,8.4870826],[-9.6932362,8.4852746],[-9.6947012,8.4847546],[-9.6953932,8.4847406],[-9.6961362,8.4848716],[-9.6968452,8.4848246],[-9.6972132,8.4847156],[-9.6977372,8.4843356],[-9.6979002,8.4841586],[-9.6979532,8.4838866],[-9.6979502,8.4828916],[-9.6982272,8.4822636],[-9.6987882,8.4813996],[-9.6990212,8.4809506],[-9.6991692,8.4804916],[-9.6991702,8.4802286],[-9.6990442,8.4799306],[-9.6990202,8.4795396],[-9.6992332,8.4781546],[-9.6993272,8.4766926],[-9.6995532,8.4760396],[-9.6993852,8.4740236],[-9.7006613,8.4720326],[-9.7007323,8.4716246],[-9.7007423,8.4713106],[-9.7006083,8.4707746],[-9.7004743,8.4704416],[-9.6999993,8.4697596],[-9.6999243,8.4694706],[-9.6998863,8.4686456],[-9.7001203,8.4679926],[-9.7010583,8.4668916],[-9.7013253,8.4664166],[-9.7015073,8.4660186],[-9.7016143,8.4652536],[-9.7016273,8.4644716],[-9.7014263,8.4637486],[-9.7014353,8.4621666],[-9.7013183,8.4617586],[-9.7012083,8.4615626],[-9.7009443,8.4613236],[-9.7003053,8.4609626],[-9.6994943,8.4593606],[-9.6989673,8.4589756],[-9.6987713,8.4587196],[-9.6984523,8.4578766],[-9.6983623,8.4571626],[-9.6984153,8.4568306],[-9.6986053,8.4564236],[-9.6988883,8.4561786],[-9.6992593,8.4557216],[-9.6995407,8.4552111],[-9.6999278,8.4553709],[-9.70036,8.4552816],[-9.7005459,8.4543933],[-9.7008585,8.4543627],[-9.7011971,8.45408],[-9.70131,8.4536518],[-9.7020723,8.4540148],[-9.7022041,8.4538426],[-9.7024676,8.4539357],[-9.7027311,8.4531863],[-9.7023942,8.4528618],[-9.7024115,8.451947],[-9.7025664,8.4519063],[-9.7027438,8.4519995],[-9.70299,8.4514176],[-9.7035586,8.4515852],[-9.7036403,8.4510913],[-9.7039812,8.4509807],[-9.7043358,8.4508776],[-9.7047118,8.450333],[-9.7050416,8.4503191],[-9.7050652,8.4507706],[-9.7052816,8.4508962],[-9.7053946,8.4506868],[-9.7055263,8.4505704],[-9.7056863,8.4506076],[-9.7057381,8.4507659],[-9.7058416,8.4510173],[-9.7059263,8.4508823],[-9.7060957,8.4507706],[-9.7063545,8.4508311],[-9.7065587,8.4506836],[-9.7063075,8.4502446],[-9.7061851,8.4501515],[-9.7061946,8.4499979],[-9.7063404,8.449942],[-9.7065663,8.4500212],[-9.7067075,8.4497465],[-9.7068251,8.4495836],[-9.7070709,8.4494964],[-9.7071263,8.4491973],[-9.7068769,8.4491275],[-9.7068204,8.4489227],[-9.7069139,8.4487825],[-9.7071013,8.448536],[-9.7073992,8.4484712],[-9.7074463,8.4486434],[-9.7075169,8.4487365],[-9.7076251,8.4486248],[-9.7076392,8.4485037],[-9.7075357,8.4484107],[-9.7076157,8.448285],[-9.7078274,8.44842],[-9.7080768,8.4484293],[-9.7082269,8.4482868],[-9.7082227,8.4480243],[-9.7083404,8.4478195],[-9.7085709,8.4474239],[-9.7087636,8.4469605],[-9.7089693,8.4460186],[-9.7091933,8.4457556],[-9.7093833,8.4453576],[-9.7097783,8.4449856],[-9.7091827,8.4449662],[-9.7090792,8.4444914],[-9.7090698,8.4440911],[-9.7094791,8.4440771],[-9.70987,8.4441332],[-9.7105533,8.4440116],[-9.7109673,8.4432668],[-9.7109431,8.4425964],[-9.7107612,8.4423986],[-9.7104674,8.4424247],[-9.7099544,8.4426574],[-9.7097333,8.4423735],[-9.7098274,8.4420104],[-9.7102038,8.4415915],[-9.7107356,8.4413588],[-9.7110631,8.4416449],[-9.7116863,8.4416796],[-9.7118841,8.4412313],[-9.7117816,8.4406287],[-9.711954,8.4405565],[-9.7119939,8.4396975],[-9.7123366,8.4392828],[-9.7130553,8.4391915],[-9.7134443,8.4390266],[-9.7141783,8.4390816],[-9.7148713,8.4389996],[-9.7154613,8.4388756],[-9.7162733,8.4387946],[-9.7167863,8.4388566],[-9.7172123,8.4389776],[-9.7177238,8.4392776],[-9.7179483,8.4402476],[-9.7178433,8.4406806],[-9.7177573,8.4408586],[-9.7177463,8.4412406],[-9.7172993,8.4433636],[-9.7172643,8.4449616],[-9.7174833,8.4454136],[-9.7175243,8.4457536],[-9.7174973,8.4460936],[-9.7169523,8.4471876],[-9.7166923,8.4478576],[-9.7166393,8.4482066],[-9.7166713,8.4485636],[-9.7169313,8.4494066],[-9.7171463,8.4506566],[-9.7170673,8.4509966],[-9.7169043,8.4512506],[-9.7163883,8.4517926],[-9.7162553,8.4525736],[-9.7160663,8.4528536],[-9.7155173,8.4531396],[-9.7153023,8.4533516],[-9.7152843,8.4536406],[-9.7153683,8.4552646],[-9.7153233,8.4557486],[-9.7154233,8.4562246],[-9.7164123,8.4580996],[-9.7166133,8.4587556],[-9.7168503,8.4591986],[-9.7170463,8.4593016],[-9.7173863,8.4597196],[-9.7176243,8.4597886],[-9.7181093,8.4602336],[-9.7182603,8.4606506],[-9.7187793,8.4610946],[-9.7188203,8.4614526],[-9.7192253,8.4623046],[-9.7195223,8.4627136],[-9.7203903,8.4633126],[-9.7206613,8.4637906],[-9.7211383,8.4641076],[-9.7213403,8.4645416],[-9.7217483,8.4649096],[-9.7218493,8.4652586],[-9.7220353,8.4655826],[-9.7223853,8.4657536],[-9.7229153,8.4657226],[-9.7232403,8.4656046],[-9.7246673,8.4640816],[-9.7253103,8.4636936],[-9.7262513,8.4635796],[-9.7266413,8.4640406],[-9.7267933,8.4643976],[-9.7268673,8.4649336],[-9.7268813,8.4655456],[-9.7270323,8.4659376],[-9.7272873,8.4662876],[-9.7282223,8.4670656],[-9.7292203,8.4674276],[-9.7303023,8.4680106],[-9.7306163,8.4683096],[-9.7311089,8.4692586],[-9.7312003,8.4694346],[-9.7315313,8.4698696],[-9.7317773,8.4701176],[-9.7321093,8.4702886],[-9.7325523,8.4706396],[-9.7333013,8.4710256],[-9.7337443,8.4714186],[-9.7341423,8.4720666],[-9.7343503,8.4729436],[-9.7345123,8.4731566],[-9.7344132,8.4740486],[-9.7347312,8.4767616],[-9.7347982,8.4769746],[-9.7354162,8.4779296],[-9.7355852,8.4782876],[-9.7357032,8.4786366],[-9.7359032,8.4795726],[-9.7364352,8.4807396],[-9.7367972,8.4817016],[-9.7368702,8.4822716],[-9.7368592,8.4828416],[-9.7367172,8.4836736],[-9.7366532,8.4844806],[-9.7366772,8.4847446],[-9.7368122,8.4850516],[-9.7369902,8.4852986],[-9.7376622,8.4857866],[-9.7380952,8.4864266],[-9.7382382,8.4868346],[-9.7382822,8.4881356],[-9.7386122,8.4886386],[-9.7386422,8.4894806],[-9.7389642,8.4899156],[-9.7392702,8.4902226],[-9.7394992,8.4905646],[-9.7398872,8.4914246],[-9.7404512,8.4929406],[-9.7406072,8.4940376],[-9.7407512,8.4944126],[-9.7412252,8.4951796],[-9.7413942,8.4955716],[-9.7415022,8.4960476],[-9.7415502,8.4966346],[-9.7414432,8.4974416],[-9.7414212,8.4982666],[-9.7416892,8.4993556],[-9.7423392,8.5007526],[-9.7427452,8.5015026],[-9.7431862,8.5021936],[-9.7435832,8.5029346],[-9.7438452,8.5035486],[-9.7438512,8.5038716],[-9.7436702,8.5041336],[-9.7435582,8.5043966],[-9.7435712,8.5050346],[-9.7438582,8.5057326],[-9.7439162,8.5060306],[-9.7438882,8.5065146],[-9.7437922,8.5069146],[-9.7435402,8.5075416],[-9.7433422,8.5079066],[-9.7432802,8.5083056],[-9.7432652,8.5093346],[-9.7435802,8.5095906],[-9.7428622,8.5096466],[-9.7426132,8.5097566],[-9.7420022,8.5105356],[-9.7408792,8.5111506],[-9.7402612,8.5116326],[-9.7399022,8.5118006],[-9.7395252,8.5118926],[-9.7380382,8.5118936],[-9.7368082,8.5118196],[-9.7362002,8.5119446],[-9.7354292,8.5122386],[-9.7346322,8.5127186],[-9.7343242,8.5128446],[-9.7324762,8.5131256],[-9.7321792,8.5127926],[-9.7319502,8.5123916],[-9.7313812,8.5117766],[-9.7307672,8.5115186],[-9.7303912,8.5115596],[-9.7301772,8.5116946],[-9.7294292,8.5124046],[-9.7291892,8.5125826],[-9.7283842,8.5129096],[-9.7277752,8.5132726],[-9.7273372,8.5135936],[-9.7268382,8.5141266],[-9.7262382,8.5145656],[-9.7260042,8.5151086],[-9.7258992,8.5154656],[-9.7258072,8.5167056],[-9.7256682,8.5170966],[-9.7256402,8.5174446],[-9.7253612,8.5184206],[-9.7250742,8.5209616],[-9.7250532,8.5230776],[-9.7248872,8.5252536],[-9.7249202,8.5255506],[-9.7250892,8.5258576],[-9.7258202,8.5265756],[-9.7262792,8.5269346],[-9.7264322,8.5272446],[-9.7268422,8.5278726],[-9.7276222,8.5283336],[-9.7281712,8.5289926],[-9.7283372,8.5295126],[-9.7288402,8.5300496],[-9.7310862,8.5317536],[-9.7364592,8.5340686],[-9.7398602,8.5351076],[-9.7422962,8.5357756],[-9.7428772,8.5362516],[-9.7461112,8.5395936],[-9.7471632,8.5407736],[-9.7482292,8.5423056],[-9.7497352,8.5446476],[-9.7502042,8.5445996],[-9.7511082,8.5447556],[-9.7515942,8.5447796],[-9.7520132,8.5448906],[-9.7525202,8.5451336],[-9.7530482,8.5457946],[-9.7533792,8.5461036],[-9.7538862,8.5465016],[-9.7543932,8.5467006],[-9.7546352,8.5468766],[-9.7547892,8.5471636],[-9.7550542,8.5473396],[-9.7554292,8.5473416],[-9.7563562,8.5471676],[-9.7566872,8.5472566],[-9.7572308,8.5475133],[-9.7575439,8.5475942],[-9.7577372,8.5476637],[-9.7580015,8.5477379],[-9.7582762,8.5478259],[-9.7585407,8.5478804],[-9.7588463,8.5480962],[-9.7593964,8.5483444],[-9.7597243,8.5485733],[-9.7599848,8.5487737],[-9.7605251,8.5489645],[-9.7609158,8.5488747],[-9.7613879,8.5489808],[-9.7618009,8.5490338],[-9.7622408,8.5492779],[-9.7625092,8.5496696],[-9.7628182,8.5497586],[-9.7634362,8.5497386],[-9.7637452,8.5497836],[-9.7642082,8.5501146],[-9.7645392,8.5502476],[-9.7647372,8.5502036],[-9.7645973,8.5504358],[-9.7647491,8.5505481],[-9.765193,8.5506859],[-9.7655389,8.5508441],[-9.7654408,8.5509513],[-9.7656266,8.5511759],[-9.7658486,8.5509411],[-9.7660975,8.551072],[-9.7663633,8.5509785],[-9.7665358,8.5509262],[-9.7665362,8.551203],[-9.7668452,8.5512514],[-9.7667936,8.5514351],[-9.7673872,8.551476],[-9.7674646,8.5516444],[-9.7681821,8.551721],[-9.768582,8.551925],[-9.7690602,8.5518656],[-9.7695232,8.5519106],[-9.7703856,8.5515047],[-9.7706584,8.5512755],[-9.7711018,8.5512984],[-9.7722632,8.5513149],[-9.7739728,8.5506303],[-9.7749463,8.550312],[-9.7756153,8.549988],[-9.7764382,8.5487852],[-9.7773958,8.5476336],[-9.7781082,8.5465585],[-9.7788954,8.5443495],[-9.7798394,8.542139],[-9.7814217,8.5408858],[-9.7822413,8.5403606],[-9.7827125,8.5398054],[-9.7833625,8.5381694],[-9.7835588,8.5374551],[-9.7838437,8.5367004],[-9.7849007,8.5354502],[-9.7855289,8.53437],[-9.7861252,8.5332058],[-9.7865657,8.5329132],[-9.7869384,8.5327872],[-9.7871005,8.5328974],[-9.787445,8.5331927],[-9.7876722,8.533384],[-9.7896181,8.5343178],[-9.7916586,8.5350197],[-9.7930271,8.5354287],[-9.7942107,8.5356294],[-9.7950762,8.5357859],[-9.7955032,8.5353989],[-9.7956777,8.5350557],[-9.7955002,8.5344649],[-9.7957049,8.533739],[-9.7968041,8.5329248],[-9.7972127,8.532644],[-9.7977379,8.5320634],[-9.7979697,8.5314459],[-9.7985785,8.5294632],[-9.7993656,8.5287555],[-9.80043,8.5271434],[-9.8009392,8.5264079],[-9.8012182,8.5254083],[-9.8011354,8.5247194],[-9.8008074,8.5243649],[-9.8004623,8.5246042],[-9.800084,8.5251509],[-9.7999201,8.5258137],[-9.7996414,8.526254],[-9.7987889,8.5259864],[-9.7976124,8.5260328],[-9.7967065,8.5258012],[-9.7965036,8.5256953],[-9.7963867,8.5251328],[-9.7965225,8.5240727],[-9.7963521,8.5230118],[-9.7963967,8.5218309],[-9.7966633,8.5214654],[-9.7968531,8.5199937],[-9.7966824,8.5191521],[-9.7964833,8.5188484],[-9.7955101,8.5186583],[-9.7949718,8.5183274],[-9.7944812,8.5178636],[-9.7932115,8.5170221],[-9.7923965,8.5167038],[-9.7915535,8.5167331],[-9.7905315,8.5164868],[-9.7900415,8.5162838],[-9.7897699,8.5160694],[-9.7895608,8.5156462],[-9.7900047,8.5146697],[-9.7903367,8.513837],[-9.7906252,8.5127791],[-9.7909991,8.5111048],[-9.7904508,8.5087359],[-9.7904517,8.508156],[-9.7907157,8.5076917],[-9.7913637,8.5073494],[-9.7920588,8.5070529],[-9.7955106,8.5066995],[-9.7985448,8.5052563],[-9.7994523,8.5043879],[-9.799951,8.5041926],[-9.8022496,8.5038865],[-9.8031243,8.5034476],[-9.8040205,8.5026705],[-9.805105,8.5017853],[-9.8059871,8.5013873],[-9.8068925,8.5015345],[-9.8078292,8.5020191],[-9.8120872,8.5027478],[-9.8129503,8.5027134],[-9.8147219,8.5025417],[-9.8157771,8.5025813],[-9.8186132,8.5029929],[-9.8193439,8.5028249],[-9.8199432,8.5026356],[-9.8211838,8.5017569],[-9.8217009,8.5014195],[-9.8227182,8.5010257],[-9.8234406,8.5009947],[-9.824074,8.5012847],[-9.8257474,8.5021064],[-9.8264713,8.5020792],[-9.828052,8.5025369],[-9.8316357,8.5015444],[-9.8324819,8.5006896],[-9.8324834,8.5002933],[-9.8323799,8.5001002],[-9.8321007,8.499702],[-9.8317922,8.4991284],[-9.8315511,8.4986664],[-9.831409,8.498295],[-9.8312894,8.4977092],[-9.8312431,8.4974088],[-9.831084,8.4971114],[-9.8309385,8.4966331],[-9.8308606,8.4961359],[-9.8305882,8.4955841],[-9.8304923,8.4951529],[-9.8305695,8.4949239],[-9.8309864,8.4945645],[-9.8314544,8.494453],[-9.8320102,8.494114],[-9.8330376,8.493776],[-9.8338407,8.4937905],[-9.8343505,8.493689],[-9.8350848,8.4937191],[-9.8355323,8.4937848],[-9.8356391,8.4937979],[-9.8371794,8.4939855],[-9.8374082,8.4937333],[-9.837661,8.4930639],[-9.8377901,8.4923712],[-9.8379006,8.4916698],[-9.8381329,8.4899607],[-9.8382463,8.4892782],[-9.8384469,8.4887445],[-9.8387544,8.4883021],[-9.8393053,8.4873665],[-9.8396769,8.486554],[-9.840016,8.4857292],[-9.8403804,8.4851009],[-9.8409356,8.4846905],[-9.8416727,8.4840805],[-9.8423562,8.4837675],[-9.8433995,8.4833949],[-9.8441676,8.4831366],[-9.8447051,8.483165],[-9.8451934,8.4832692],[-9.8456024,8.4833851],[-9.8458219,8.4835298],[-9.8459516,8.4838265],[-9.8458304,8.4841652],[-9.8450343,8.4844751],[-9.8440319,8.4849529],[-9.8435092,8.4851857],[-9.8432399,8.4854156],[-9.8429851,8.4857563],[-9.8428591,8.4862805],[-9.8428683,8.4868284],[-9.8429569,8.4874091],[-9.8435983,8.4887253],[-9.8438789,8.4891157],[-9.8444553,8.4893963],[-9.8451474,8.4893607],[-9.846137,8.4896245],[-9.8464614,8.489781],[-9.846775,8.4899551],[-9.8469333,8.4902252],[-9.8468562,8.4906395],[-9.8466883,8.491167],[-9.846862,8.4922912],[-9.8470257,8.4929549],[-9.8474123,8.4936294],[-9.8481345,8.4948191],[-9.8485862,8.495243],[-9.8489065,8.4956764],[-9.8493477,8.4961847],[-9.8517349,8.4980564],[-9.852558,8.4989738],[-9.8531987,8.4997659],[-9.8536091,8.5002659],[-9.8539295,8.500553],[-9.854315,8.5008303],[-9.8546903,8.5007461],[-9.8551747,8.5005834],[-9.8555913,8.5003698],[-9.856217,8.5002609],[-9.8570979,8.5001124],[-9.858109,8.5001025],[-9.8589449,8.5002065],[-9.8595856,8.5003401],[-9.860887,8.5004441],[-9.8611373,8.5001173],[-9.8611323,8.4997461],[-9.8613125,8.4995134],[-9.8615177,8.4992015],[-9.861783,8.4987312],[-9.8622836,8.4982708],[-9.8630494,8.4980084],[-9.8636577,8.4979047],[-9.8647664,8.4978941],[-9.8655841,8.4977757],[-9.8661928,8.4978599],[-9.8666973,8.4981389],[-9.8671889,8.4984243],[-9.8678096,8.498751],[-9.868215,8.4988208],[-9.8687934,8.4986071],[-9.8691028,8.4984631],[-9.8695948,8.4983664],[-9.8699792,8.498357],[-9.8707054,8.4985864],[-9.8724382,8.4987413],[-9.8731353,8.4984752],[-9.8742481,8.4982803],[-9.874813,8.497984],[-9.8753785,8.497882],[-9.876118,8.4977654],[-9.879071,8.4982982],[-9.8826199,8.4982922],[-9.8831793,8.4978645],[-9.8832453,8.4973382],[-9.8833932,8.4968973],[-9.8838058,8.4961719],[-9.8841279,8.4956806],[-9.8845985,8.4954393],[-9.8848327,8.4952213],[-9.884961,8.4948402],[-9.8852956,8.4941323],[-9.8858346,8.4939077],[-9.8863278,8.4937958],[-9.8866529,8.4940226],[-9.8871236,8.4941234],[-9.8875317,8.4938994],[-9.887837,8.4938987],[-9.8882193,8.4942628],[-9.88846,8.4945498],[-9.8888635,8.4947249],[-9.8891537,8.4948719],[-9.8894247,8.4951056],[-9.8895147,8.495481],[-9.8896209,8.4959851],[-9.8896138,8.4969932],[-9.8897129,8.4980224],[-9.8901191,8.4983105],[-9.8904137,8.4980504],[-9.8906898,8.4977563],[-9.891072,8.4975953],[-9.8918011,8.4977283],[-9.8930895,8.4980154],[-9.8940805,8.4982674],[-9.894845,8.4985194],[-9.8954396,8.4989255],[-9.896105,8.4991635],[-9.897627,8.4992896],[-9.8990853,8.4992407],[-9.9004868,8.4991355]]]]}]}
