# Supplementary material
Source: ML conference proceedings conference paper supplement (https://proceedings.neurips.cc/paper_files/paper/2022/hash/9d3faa41886997cfc2128b930077fa49-Abstract.html)
Supplement: Supplementary file 1 [file 9d3faa41886997cfc2128b930077fa49-Supplemental-Conference.zip › code/ebola/map/geojson/margibi.geojson]

{"type":"GeometryCollection","geometries":[{"type":"MultiPolygon","coordinates":[[[[-10.6518664,6.3412639],[-10.6413205,6.2485278],[-10.6409257,6.2481122],[-10.6391517,6.2443826],[-10.6374271,6.2399448],[-10.6373523,6.2397591],[-10.63592,6.2398449],[-10.6348361,6.2399099],[-10.6349187,6.2392168],[-10.6351493,6.2384587],[-10.6351924,6.2383173],[-10.6337279,6.2381387],[-10.6319163,6.2379177],[-10.631849,6.237932],[-10.6317736,6.2379866],[-10.6281477,6.2406914],[-10.627261,6.2405479],[-10.6268707,6.2404771],[-10.6267457,6.2404578],[-10.6248144,6.2401325],[-10.6225904,6.2397042],[-10.6232827,6.2377483],[-10.6244945,6.2347582],[-10.6246699,6.2346492],[-10.6245708,6.2345698],[-10.6248991,6.233759],[-10.6249458,6.2336446],[-10.6249289,6.2285711],[-10.6249289,6.2284856],[-10.6249245,6.2267259],[-10.6247964,6.2257547],[-10.6286822,6.2257428],[-10.6287152,6.2181141],[-10.6270758,6.2176962],[-10.626837,6.2176483],[-10.6264434,6.2175896],[-10.6262906,6.2175662],[-10.6255362,6.2173603],[-10.625048,6.2172376],[-10.6242058,6.2170257],[-10.6236386,6.2168576],[-10.6230645,6.2167203],[-10.6217502,6.2163764],[-10.6208746,6.2161483],[-10.6200269,6.2159378],[-10.6188601,6.2156311],[-10.6172562,6.215239],[-10.6166125,6.2150831],[-10.6162866,6.2149991],[-10.6159312,6.2148952],[-10.6153868,6.2147364],[-10.6145512,6.2145072],[-10.6138311,6.2143071],[-10.6130895,6.2141151],[-10.612549,6.2139832],[-10.6120366,6.2138285],[-10.6113286,6.2136485],[-10.6102141,6.2133912],[-10.6093598,6.2131446],[-10.6089146,6.2130272],[-10.6079222,6.2127433],[-10.60745,6.21261],[-10.6070762,6.212505],[-10.6068989,6.2124366],[-10.6064697,6.2122993],[-10.6059728,6.2121673],[-10.6043534,6.2116888],[-10.603585,6.211494],[-10.6027494,6.2112767],[-10.6018053,6.2110155],[-10.6010905,6.2108074],[-10.6002456,6.2105568],[-10.5989917,6.2102021],[-10.598061,6.2099208],[-10.5968446,6.2095622],[-10.5965395,6.2094856],[-10.5955383,6.2091529],[-10.5946881,6.2088822],[-10.593064,6.2084144],[-10.5928441,6.2083496],[-10.5922621,6.208149],[-10.5915808,6.2079456],[-10.5910241,6.2077611],[-10.589714,6.2073184],[-10.5893686,6.207221],[-10.5888261,6.207057],[-10.5882708,6.2068704],[-10.5872799,6.2065824],[-10.5861909,6.2062504],[-10.5853956,6.2060078],[-10.5849517,6.2058599],[-10.5846164,6.2057626],[-10.5843522,6.2056786],[-10.5840812,6.2056079],[-10.583681,6.2055019],[-10.5827892,6.2052213],[-10.582091,6.2049518],[-10.5819798,6.2049133],[-10.5812421,6.2046945],[-10.580416,6.2044533],[-10.5800151,6.2043586],[-10.5790173,6.2040547],[-10.578446,6.203904],[-10.577986,6.2037652],[-10.5772176,6.2035159],[-10.576091,6.2031734],[-10.5755519,6.2030294],[-10.5745515,6.2027066],[-10.5736917,6.2024373],[-10.5728067,6.2021574],[-10.5722353,6.2020014],[-10.5718901,6.2018948],[-10.5710512,6.2015988],[-10.5704772,6.2014175],[-10.5695169,6.2011694],[-10.5689591,6.2010228],[-10.5683997,6.2008508],[-10.5673,6.2005308],[-10.5668762,6.2004149],[-10.5661923,6.2002429],[-10.5655995,6.2000695],[-10.5649772,6.1998855],[-10.5644515,6.1997655],[-10.5635141,6.1995176],[-10.5627641,6.1993162],[-10.5622374,6.1991389],[-10.5616969,6.1989616],[-10.5608708,6.1987083],[-10.5604041,6.1985643],[-10.5597657,6.1983043],[-10.5592105,6.1981109],[-10.558214,6.197747],[-10.5568099,6.197291],[-10.5555077,6.1969257],[-10.5544294,6.196605],[-10.5524071,6.1959311],[-10.5506596,6.1953844],[-10.5494124,6.1950964],[-10.5491026,6.1950165],[-10.548766,6.1948831],[-10.5483341,6.1946991],[-10.5478191,6.1945298],[-10.5467328,6.1942645],[-10.5452818,6.1939204],[-10.5440186,6.1936005],[-10.5419854,6.1931579],[-10.5410506,6.1929512],[-10.5405624,6.1928298],[-10.539967,6.1926766],[-10.5392522,6.1924566],[-10.5385308,6.1922806],[-10.5378547,6.1921592],[-10.5375771,6.1921059],[-10.537152,6.1920006],[-10.5363902,6.1917766],[-10.5351135,6.1914218],[-10.5340192,6.1911779],[-10.5328135,6.190846],[-10.5321081,6.190634],[-10.531054,6.1903045],[-10.5297813,6.1899393],[-10.528412,6.189586],[-10.5277146,6.1893886],[-10.5264312,6.1890354],[-10.5254455,6.1887447],[-10.5242654,6.1884394],[-10.5228102,6.1880541],[-10.5219117,6.1878301],[-10.5211204,6.1876034],[-10.520234,6.1873541],[-10.5196922,6.1872207],[-10.5190927,6.1870874],[-10.5189425,6.1870474],[-10.5186836,6.1869494],[-10.5183336,6.1868461],[-10.5174217,6.1865768],[-10.5165325,6.186314],[-10.5151096,6.1858808],[-10.5140957,6.1855661],[-10.5131811,6.1853141],[-10.5127278,6.1851941],[-10.5119915,6.1849741],[-10.5111024,6.1846675],[-10.510067,6.1843355],[-10.5088077,6.1839742],[-10.5083303,6.1838742],[-10.5079179,6.1838082],[-10.5077831,6.1837988],[-10.5076712,6.1837648],[-10.5069651,6.1834955],[-10.5064836,6.1833181],[-10.506025,6.1831449],[-10.5057192,6.1830009],[-10.505282,6.1827382],[-10.504826,6.1825289],[-10.5043956,6.1823302],[-10.5040187,6.1821835],[-10.5036633,6.1820782],[-10.5021049,6.1816396],[-10.5007759,6.1812516],[-10.5003481,6.1811396],[-10.4998049,6.1810262],[-10.4990324,6.1807849],[-10.4973225,6.1802955],[-10.4961035,6.1799356],[-10.4944445,6.1793663],[-10.4925911,6.1787636],[-10.4909939,6.1782568],[-10.4902697,6.1779849],[-10.4890318,6.1775276],[-10.4886751,6.1773983],[-10.4880019,6.1771249],[-10.4876961,6.177013],[-10.4873608,6.176885],[-10.4865375,6.176593],[-10.4853371,6.1762436],[-10.4847591,6.1760836],[-10.4840202,6.1758396],[-10.4833308,6.175641],[-10.482561,6.1753716],[-10.4818785,6.1751663],[-10.4816732,6.175113],[-10.4812159,6.1749476],[-10.4804608,6.1747222],[-10.4799365,6.1745596],[-10.4792056,6.174265],[-10.478885,6.174157],[-10.4782574,6.173957],[-10.4778262,6.1737943],[-10.4772289,6.173601],[-10.476412,6.173349],[-10.4760204,6.1732483],[-10.4758354,6.1731897],[-10.4752694,6.1730183],[-10.474497,6.1728076],[-10.4722534,6.1721396],[-10.4714486,6.1718077],[-10.4709417,6.1716557],[-10.470306,6.1715037],[-10.4698634,6.1713823],[-10.4689395,6.171113],[-10.4680569,6.170865],[-10.4674566,6.170687],[-10.4667266,6.1704317],[-10.4661874,6.170229],[-10.4658455,6.1701237],[-10.4654056,6.1700317],[-10.4650757,6.1699423],[-10.4647364,6.1698583],[-10.4638808,6.1695823],[-10.4636179,6.169497],[-10.4630452,6.1692703],[-10.4625396,6.1690983],[-10.4619576,6.168909],[-10.4611396,6.168629],[-10.4603402,6.1683303],[-10.4598185,6.1681477],[-10.4594552,6.1680516],[-10.459199,6.1679637],[-10.4581663,6.1676036],[-10.4571471,6.167257],[-10.4560219,6.166893],[-10.4548229,6.1665656],[-10.4540853,6.1663576],[-10.4532143,6.1660943],[-10.4521072,6.165765],[-10.4512302,6.1654889],[-10.450864,6.1653383],[-10.4505838,6.1652396],[-10.4497148,6.1649116],[-10.4487732,6.164589],[-10.4473343,6.1640796],[-10.4465295,6.1637863],[-10.4452917,6.1633063],[-10.4446266,6.1630263],[-10.4440191,6.1627395],[-10.4435705,6.1625576],[-10.4425592,6.1621403],[-10.4415078,6.1617402],[-10.4397891,6.1611316],[-10.4392206,6.1609209],[-10.437508,6.1602355],[-10.4360824,6.1597489],[-10.4348043,6.1593129],[-10.4331923,6.1587315],[-10.4321623,6.1583395],[-10.4308373,6.1577662],[-10.429515,6.1572647],[-10.4285293,6.1569154],[-10.4274161,6.1564981],[-10.4259397,6.155982],[-10.4255051,6.1558113],[-10.4249042,6.1555728],[-10.4234801,6.1549607],[-10.4224339,6.1545207],[-10.4198135,6.1535099],[-10.4184536,6.1530193],[-10.4179225,6.1528406],[-10.4175282,6.1527087],[-10.4172118,6.1526099],[-10.4167652,6.1524592],[-10.4155944,6.1520832],[-10.4149398,6.1518593],[-10.4140816,6.1515952],[-10.4119412,6.1508592],[-10.4098652,6.1501206],[-10.4084195,6.1496218],[-10.4073117,6.1492004],[-10.4058043,6.1487471],[-10.4043988,6.1483071],[-10.4034118,6.1480645],[-10.4026058,6.1478098],[-10.401612,6.147491],[-10.4006344,6.1471845],[-10.400071,6.146959],[-10.398384,6.1462136],[-10.3976932,6.145891],[-10.3956079,6.1449403],[-10.3947911,6.1445469],[-10.3939126,6.1441029],[-10.3927111,6.1434789],[-10.3910588,6.1426601],[-10.389766,6.1419908],[-10.3889599,6.1415387],[-10.3884798,6.1412161],[-10.3879046,6.1408134],[-10.3875437,6.1405534],[-10.386892,6.140056],[-10.3866104,6.1398306],[-10.3858875,6.1392506],[-10.3856434,6.1390399],[-10.3854489,6.1388479],[-10.3848588,6.1382372],[-10.3846122,6.1380145],[-10.3844431,6.1378719],[-10.3842795,6.1377612],[-10.3838061,6.1374612],[-10.3832898,6.1371225],[-10.3829612,6.1369185],[-10.3828231,6.1368158],[-10.382583,6.1366104],[-10.382347,6.1364438],[-10.381698,6.1359691],[-10.3814578,6.1357771],[-10.3810971,6.1355264],[-10.380865,6.1353277],[-10.3806814,6.1351517],[-10.3805459,6.1350144],[-10.3804728,6.134895],[-10.3804339,6.1347697],[-10.3804273,6.1345823],[-10.3804412,6.134539],[-10.3804822,6.1345183],[-10.3806063,6.1345136],[-10.3807296,6.134513],[-10.3808154,6.1344696],[-10.3808858,6.1343676],[-10.3809415,6.1342356],[-10.380967,6.1341329],[-10.3809663,6.1340503],[-10.3809247,6.1339529],[-10.3808329,6.1338896],[-10.3807504,6.1338736],[-10.3806692,6.133869],[-10.3806016,6.133865],[-10.378706,6.1322342],[-10.3757743,6.1297354],[-10.3757306,6.1296613],[-10.3756147,6.1294499],[-10.375431,6.129216],[-10.3751655,6.128938],[-10.374849,6.1285859],[-10.3746049,6.1282926],[-10.3743635,6.1279391],[-10.3741864,6.1277125],[-10.3737519,6.1272044],[-10.3732986,6.126639],[-10.3730048,6.126255],[-10.3727112,6.125815],[-10.3722177,6.1250149],[-10.3719682,6.1245683],[-10.3712167,6.1254091],[-10.3698231,6.1270219],[-10.3693885,6.1294235],[-10.370863,6.1317711],[-10.3726884,6.1333039],[-10.3758659,6.135971],[-10.3813578,6.1398762],[-10.3821991,6.143548],[-10.3808386,6.1473725],[-10.3799136,6.1480322],[-10.3784936,6.1490442],[-10.375041,6.1496623],[-10.3742243,6.1488557],[-10.3723164,6.1500985],[-10.3629342,6.1510438],[-10.3614842,6.1516173],[-10.3579465,6.1530156],[-10.3553328,6.1550877],[-10.354038,6.1599588],[-10.353445,6.1621867],[-10.3531921,6.1631358],[-10.3535781,6.1657915],[-10.3536913,6.1665712],[-10.3552021,6.1709033],[-10.3577579,6.1750117],[-10.3577422,6.1755007],[-10.3576672,6.1778534],[-10.3559597,6.1801181],[-10.356017,6.1804469],[-10.3532486,6.185402],[-10.3506627,6.1879415],[-10.3403338,6.1981148],[-10.3403296,6.1983415],[-10.3402835,6.2008625],[-10.3402547,6.2024408],[-10.341041,6.2042639],[-10.342175,6.2068939],[-10.346102,6.211195],[-10.3483718,6.2183412],[-10.3496239,6.2200456],[-10.3510608,6.2220297],[-10.3531859,6.2248935],[-10.3544983,6.229638],[-10.3554849,6.2325747],[-10.3551698,6.2338044],[-10.3548063,6.2352218],[-10.3536047,6.2362017],[-10.3519264,6.2365823],[-10.3504844,6.2377272],[-10.3497455,6.2409666],[-10.3495108,6.2426808],[-10.3477758,6.2470313],[-10.3470011,6.2486954],[-10.3463293,6.2534691],[-10.3452152,6.2569614],[-10.3440491,6.2593024],[-10.3428354,6.2601579],[-10.3400999,6.2620867],[-10.3392609,6.2619102],[-10.3352397,6.2667192],[-10.3328999,6.2661402],[-10.330559,6.2655611],[-10.3289521,6.2651633],[-10.3285448,6.2659426],[-10.3278822,6.2658556],[-10.3276102,6.2667143],[-10.3276385,6.2670686],[-10.3278449,6.2672818],[-10.3278443,6.2675011],[-10.3286406,6.2675347],[-10.3293957,6.2679444],[-10.3309415,6.269141],[-10.3323431,6.2700062],[-10.3320858,6.2732327],[-10.3318935,6.2756468],[-10.3294527,6.275653],[-10.3279149,6.2768133],[-10.3278353,6.2717366],[-10.3271763,6.2713804],[-10.3267992,6.2713814],[-10.3263527,6.2710394],[-10.3247067,6.2708723],[-10.3233605,6.2708328],[-10.322547,6.2708088],[-10.321759,6.2710171],[-10.3210034,6.271556],[-10.3206263,6.2718961],[-10.3203839,6.2714134],[-10.3199214,6.2701049],[-10.3184789,6.272885],[-10.3135496,6.2761748],[-10.3107517,6.2819507],[-10.3093507,6.2848426],[-10.3102076,6.2899084],[-10.3087359,6.292129],[-10.305783,6.29277],[-10.3049423,6.2958849],[-10.30478,6.2964862],[-10.3031869,6.2965919],[-10.3016941,6.2983932],[-10.300848,6.3004018],[-10.2995605,6.2993322],[-10.2984427,6.2986126],[-10.2976309,6.2986998],[-10.296633,6.3005395],[-10.2967899,6.3033195],[-10.2985558,6.304687],[-10.3020014,6.3050982],[-10.3035367,6.3053114],[-10.3041439,6.306215],[-10.3036478,6.3072232],[-10.3020372,6.3088986],[-10.3005268,6.3104646],[-10.3000405,6.3110519],[-10.3005342,6.3126181],[-10.3012663,6.3127322],[-10.3023952,6.3129074],[-10.3048411,6.3120195],[-10.3056247,6.3120175],[-10.3075178,6.3113475],[-10.3096393,6.3120075],[-10.3119313,6.3125958],[-10.3131709,6.3146066],[-10.313174,6.3158196],[-10.3118062,6.3169987],[-10.3108721,6.3174895],[-10.309557,6.3181801],[-10.3056947,6.3204926],[-10.3038824,6.3226315],[-10.3029044,6.323184],[-10.3015421,6.326883],[-10.3020805,6.3301917],[-10.3029832,6.3326482],[-10.3047867,6.3336069],[-10.3051456,6.3337976],[-10.307228,6.3355864],[-10.3092618,6.3371397],[-10.3133958,6.3407366],[-10.3135054,6.3425163],[-10.3135702,6.3435725],[-10.3136887,6.3450645],[-10.3128091,6.3457524],[-10.3113397,6.3455605],[-10.3099602,6.3455346],[-10.3095071,6.3455261],[-10.3078955,6.3454957],[-10.3073899,6.3454286],[-10.3050725,6.3456741],[-10.3038949,6.3446975],[-10.3039009,6.3418164],[-10.3018632,6.3407188],[-10.3013648,6.3404504],[-10.3008376,6.3407547],[-10.2998702,6.3407882],[-10.2992709,6.3416585],[-10.2987431,6.3470025],[-10.2981451,6.3481356],[-10.2981068,6.3486348],[-10.2975898,6.3499616],[-10.292771,6.3527327],[-10.2891807,6.3543848],[-10.2874332,6.3556321],[-10.2861501,6.3565482],[-10.2871332,6.3580154],[-10.2873667,6.3588949],[-10.2876274,6.3598755],[-10.2872853,6.3613511],[-10.2868952,6.3614956],[-10.2859675,6.3618394],[-10.2841058,6.3614523],[-10.2829123,6.36021],[-10.2818904,6.3598197],[-10.280313,6.3621468],[-10.2813773,6.3657335],[-10.2807,6.3665847],[-10.2796941,6.3678494],[-10.2753705,6.3691268],[-10.2743804,6.3691677],[-10.2718881,6.3692411],[-10.2690414,6.3704097],[-10.2686289,6.3743172],[-10.2693571,6.3751921],[-10.269605,6.3754899],[-10.2716986,6.3780047],[-10.2717044,6.3803278],[-10.2687504,6.3807574],[-10.2652708,6.3820326],[-10.2667361,6.387963],[-10.2670828,6.3893663],[-10.2642401,6.3921181],[-10.2610792,6.3942377],[-10.2606659,6.3978286],[-10.2630615,6.401702],[-10.2640566,6.4033106],[-10.2676567,6.4081583],[-10.2695676,6.412588],[-10.2698966,6.4176545],[-10.2710777,6.425676],[-10.2694967,6.4266301],[-10.2650641,6.4267468],[-10.2599991,6.4271815],[-10.2581998,6.4295329],[-10.2578948,6.4299316],[-10.2579045,6.4338911],[-10.2544279,6.4365394],[-10.2519097,6.4425633],[-10.2507612,6.4428159],[-10.2477669,6.4433049],[-10.2470373,6.4434236],[-10.2455136,6.4435675],[-10.2405252,6.442686],[-10.2372907,6.4419099],[-10.2370061,6.4431649],[-10.2372524,6.4462698],[-10.2370685,6.4468728],[-10.2369138,6.4473808],[-10.2364751,6.4488193],[-10.2356693,6.4490632],[-10.2341978,6.451053],[-10.2345283,6.456754],[-10.2381252,6.4601238],[-10.2381298,6.4620157],[-10.2361241,6.4623168],[-10.2355094,6.4617841],[-10.2348411,6.4617569],[-10.2328788,6.4603898],[-10.2318011,6.4603924],[-10.2304323,6.4613753],[-10.2295547,6.4630432],[-10.2278011,6.4669664],[-10.2271647,6.4700152],[-10.2270748,6.4704467],[-10.2276159,6.4715997],[-10.2284532,6.4733827],[-10.2273616,6.4752422],[-10.2273497,6.4755701],[-10.2263097,6.4781886],[-10.2259824,6.4798134],[-10.225422,6.4825947],[-10.2254018,6.4830181],[-10.2242727,6.4865221],[-10.2218258,6.4874098],[-10.2214225,6.4876261],[-10.2203583,6.4881973],[-10.2211448,6.4892734],[-10.222518,6.4900535],[-10.2229495,6.489849],[-10.2241813,6.489266],[-10.2259474,6.4903392],[-10.2259949,6.4912932],[-10.2260501,6.4923964],[-10.2271293,6.4929817],[-10.2273574,6.4929161],[-10.2276119,6.4928426],[-10.2297803,6.492424],[-10.2307857,6.4924609],[-10.2317368,6.4932112],[-10.2325606,6.4936162],[-10.2338438,6.4929268],[-10.2352131,6.490039],[-10.2356942,6.4887424],[-10.2357363,6.4874738],[-10.2361762,6.4865318],[-10.2360561,6.4855672],[-10.2353524,6.4841642],[-10.2355565,6.4838094],[-10.2362434,6.4839125],[-10.2375617,6.4842292],[-10.2383991,6.4846139],[-10.2392181,6.4849689],[-10.2399577,6.485444],[-10.2404148,6.4862309],[-10.2408666,6.4870068],[-10.2418289,6.4880067],[-10.2422058,6.4886688],[-10.2420488,6.4893025],[-10.2408274,6.4906195],[-10.2403866,6.4912398],[-10.2404985,6.4920187],[-10.2411399,6.4933954],[-10.2413106,6.4945308],[-10.2411538,6.4951385],[-10.2408721,6.4958554],[-10.2403644,6.4961819],[-10.2389806,6.4957404],[-10.2380752,6.495791],[-10.2371243,6.4965829],[-10.2365917,6.4982078],[-10.2361593,6.4992929],[-10.2345445,6.5008513],[-10.2339608,6.5026163],[-10.2384711,6.5042711],[-10.2405099,6.5061156],[-10.2417113,6.5072024],[-10.2419175,6.5081001],[-10.2422063,6.5093565],[-10.2416236,6.5114155],[-10.2422679,6.5122494],[-10.2426064,6.5126872],[-10.2440749,6.5122913],[-10.2455407,6.510818],[-10.2471565,6.5101606],[-10.249168,6.511887],[-10.2516535,6.5167838],[-10.251875,6.5172202],[-10.2531756,6.5256884],[-10.2537438,6.529386],[-10.2537935,6.5297086],[-10.2539664,6.5308342],[-10.2507489,6.5371125],[-10.2496797,6.5379828],[-10.2475395,6.5386127],[-10.2466338,6.5389603],[-10.2451696,6.5390861],[-10.2416931,6.5396333],[-10.2375792,6.542251],[-10.2369001,6.5426828],[-10.2344539,6.5439624],[-10.2318081,6.5436749],[-10.2302417,6.5441688],[-10.2282882,6.5465251],[-10.2271305,6.546806],[-10.2264783,6.5474328],[-10.2244213,6.5474632],[-10.2233774,6.5475958],[-10.2218123,6.5477946],[-10.2214772,6.5478118],[-10.2204048,6.547867],[-10.2189307,6.546107],[-10.218448,6.5457334],[-10.2180473,6.5454234],[-10.2164439,6.5474374],[-10.213959,6.5495507],[-10.2124961,6.5489279],[-10.2122106,6.5493588],[-10.2112983,6.5507345],[-10.2119906,6.5525903],[-10.211409,6.5551393],[-10.2105288,6.5559255],[-10.2089601,6.5553414],[-10.2086297,6.5547588],[-10.2083366,6.555201],[-10.2078052,6.5533059],[-10.2068928,6.5512307],[-10.2069753,6.5504273],[-10.2066523,6.5493597],[-10.2031646,6.5481381],[-10.1989235,6.5470816],[-10.1973672,6.5466189],[-10.1968766,6.5463753],[-10.1947789,6.5453323],[-10.1927735,6.5436843],[-10.191012,6.5424618],[-10.1903623,6.5420112],[-10.1899031,6.5423701],[-10.1894822,6.5426989],[-10.1896839,6.5451483],[-10.1884617,6.5476847],[-10.1882824,6.5491944],[-10.1874542,6.5521193],[-10.1857793,6.5524132],[-10.1831171,6.5528808],[-10.1794933,6.5533234],[-10.1771907,6.5528782],[-10.176136,6.5536216],[-10.1757446,6.5539407],[-10.1752658,6.5538629],[-10.174591,6.5535078],[-10.1735865,6.5523627],[-10.1731437,6.5516523],[-10.1726385,6.5511924],[-10.1721414,6.5510281],[-10.1714954,6.5515925],[-10.1711493,6.55236],[-10.1707384,6.5527871],[-10.1703246,6.5525527],[-10.1699414,6.5520793],[-10.1698023,6.5510542],[-10.1708703,6.5487665],[-10.171493,6.5473627],[-10.1704685,6.5473215],[-10.1689774,6.5476098],[-10.1667747,6.5487807],[-10.1652527,6.5492743],[-10.1640351,6.5494447],[-10.1630986,6.5491475],[-10.1632456,6.5439999],[-10.1633985,6.5431635],[-10.1636159,6.541976],[-10.1652782,6.5405024],[-10.1673296,6.53795],[-10.1683527,6.5355469],[-10.1684462,6.532851],[-10.1658682,6.5275417],[-10.1647155,6.526203],[-10.1618598,6.5239999],[-10.1585201,6.5201864],[-10.1552843,6.5189203],[-10.1536197,6.519218],[-10.1528973,6.517326],[-10.1525354,6.5163789],[-10.1521609,6.5139932],[-10.1517898,6.5116283],[-10.14992,6.5078114],[-10.1488262,6.5078783],[-10.1482546,6.5079135],[-10.145123,6.509292],[-10.141696,6.5101815],[-10.1393442,6.5098929],[-10.1366928,6.5070578],[-10.1353074,6.5055059],[-10.1350746,6.5053995],[-10.1328677,6.5052044],[-10.1319768,6.5055037],[-10.130812,6.5058947],[-10.1292432,6.5053103],[-10.1264006,6.5040306],[-10.1258703,6.5039837],[-10.1249665,6.5030304],[-10.1224257,6.5012594],[-10.1221923,6.5001062],[-10.1221352,6.4998243],[-10.1219264,6.4993454],[-10.1214343,6.4959706],[-10.1199998,6.4949269],[-10.118883,6.4941142],[-10.1184824,6.4930394],[-10.1161999,6.4909178],[-10.1145441,6.4872958],[-10.1140674,6.4871679],[-10.1099539,6.4875693],[-10.1091699,6.4873748],[-10.1086769,6.486004],[-10.1074769,6.4848727],[-10.1064811,6.4829608],[-10.1063186,6.4826779],[-10.1055339,6.4821895],[-10.1043618,6.4837602],[-10.1031782,6.4844513],[-10.1013288,6.4855305],[-10.1005933,6.486748],[-10.0999319,6.4878427],[-10.0996692,6.4882774],[-10.0977117,6.4890657],[-10.0975203,6.4912215],[-10.0987008,6.4933749],[-10.0980167,6.4941599],[-10.0971354,6.494358],[-10.0956628,6.4928914],[-10.0933111,6.4926026],[-10.0920398,6.4936833],[-10.0909626,6.4939796],[-10.0899817,6.4932954],[-10.0902727,6.4919234],[-10.0901721,6.4907478],[-10.0887033,6.4910449],[-10.0853245,6.4914931],[-10.0843345,6.4894693],[-10.0826111,6.4868777],[-10.0824083,6.4866639],[-10.0818227,6.4861864],[-10.0805129,6.4862118],[-10.0794364,6.4868019],[-10.0804182,6.4877801],[-10.0803235,6.4893478],[-10.0795401,6.4894478],[-10.0768943,6.4890612],[-10.0759146,6.4890632],[-10.0744468,6.4898504],[-10.0732696,6.4890688],[-10.0727937,6.4873378],[-10.0718875,6.4873397],[-10.0679753,6.4827561],[-10.0653641,6.4800109],[-10.0632576,6.4797813],[-10.0597255,6.4771432],[-10.0594271,6.4749883],[-10.058255,6.4734006],[-10.055614,6.4728318],[-10.0516798,6.4709869],[-10.0504247,6.4698596],[-10.0490249,6.4692567],[-10.0475284,6.4695332],[-10.0451096,6.4704425],[-10.0425376,6.4716043],[-10.0415415,6.4714487],[-10.0419696,6.4692228],[-10.0397145,6.4704157],[-10.0397056,6.4660534],[-10.0395375,6.4631379],[-10.0387814,6.4630275],[-10.0318215,6.4607879],[-10.0313338,6.4617691],[-10.0297672,6.462164],[-10.0284916,6.4611869],[-10.0284128,6.4602272],[-10.0282952,6.4587905],[-10.0268032,6.4566928],[-10.0228977,6.4561026],[-10.0218175,6.4548311],[-10.0225404,6.4532158],[-10.0201662,6.4523161],[-10.020013,6.4520111],[-10.0172092,6.4526843],[-10.011723,6.4524997],[-10.0092734,6.4522106],[-10.0086886,6.4536815],[-10.0065846,6.4547145],[-10.0028537,6.4505081],[-10.004026,6.4495923],[-10.0004785,6.4462182],[-9.9970876,6.4445956],[-9.9945727,6.4433919],[-9.9943218,6.443272],[-9.990074,6.4412395],[-9.9888453,6.4405918],[-9.9862776,6.4390026],[-9.9860754,6.4388888],[-9.98422,6.4394718],[-9.9837883,6.4394726],[-9.9807917,6.4394784],[-9.9791285,6.4406574],[-9.9778371,6.4432699],[-9.9726325,6.4465903],[-9.9713509,6.4459149],[-9.9696851,6.4457219],[-9.969258,6.4459364],[-9.9679235,6.4466072],[-9.9665513,6.4461197],[-9.9641033,6.4467122],[-9.9626368,6.4481848],[-9.9608749,6.44907],[-9.9572501,6.4487828],[-9.9562728,6.4500589],[-9.9546073,6.450062],[-9.9517688,6.4512431],[-9.9509886,6.4532045],[-9.9511684,6.4552291],[-9.948575,6.4567936],[-9.9480571,6.4571293],[-9.9473746,6.4587965],[-9.9463495,6.460807],[-9.9461608,6.4646288],[-9.9457213,6.4675076],[-9.9442847,6.4687477],[-9.9419559,6.4687521],[-9.9409775,6.4694402],[-9.9409825,6.4721836],[-9.9417719,6.4751218],[-9.9430026,6.4785],[-9.9453561,6.4797699],[-9.9454192,6.4802259],[-9.945654,6.4819248],[-9.9446762,6.4828085],[-9.9438665,6.4830486],[-9.9430115,6.4833017],[-9.9419376,6.4852637],[-9.9411575,6.4873228],[-9.9400826,6.4886969],[-9.9376355,6.4898772],[-9.9372498,6.4933071],[-9.9375461,6.4945808],[-9.9389475,6.4951678],[-9.939409,6.4953608],[-9.9397055,6.4967323],[-9.9383437,6.4978067],[-9.9380075,6.499276],[-9.9377051,6.5005982],[-9.9368762,6.5010836],[-9.9357983,6.5030111],[-9.9322908,6.5037689],[-9.9320246,6.5039248],[-9.9306205,6.5058319],[-9.9294126,6.5042869],[-9.9290134,6.5008008],[-9.9272908,6.4985936],[-9.9237793,6.498379],[-9.920637,6.4984831],[-9.9200153,6.4980219],[-9.9183261,6.4967687],[-9.916556,6.4953965],[-9.9152803,6.4958901],[-9.9137109,6.496924],[-9.9118946,6.4972218],[-9.9104212,6.4971267],[-9.9080368,6.4953384],[-9.9063147,6.493524],[-9.9032681,6.4921546],[-9.9003672,6.4899499],[-9.89609,6.4870105],[-9.89034,6.4839758],[-9.8871213,6.4825817],[-9.8837292,6.4802795],[-9.8817611,6.4779747],[-9.8804652,6.4771855],[-9.8799916,6.4768969],[-9.8780298,6.4781773],[-9.8765092,6.4790149],[-9.8743498,6.4796077],[-9.8728785,6.4805436],[-9.8716032,6.4814299],[-9.8707214,6.4825118],[-9.8695944,6.4839869],[-9.8679515,6.4850458],[-9.8648599,6.4860828],[-9.8624541,6.4862338],[-9.8596049,6.4856004],[-9.85828,6.4860448],[-9.8569072,6.487275],[-9.8554851,6.4884069],[-9.8544056,6.4887524],[-9.8527734,6.4892004],[-9.8473872,6.5007435],[-9.8456066,6.5043203],[-9.844345,6.5130017],[-9.8443565,6.519894],[-9.8512565,6.5249879],[-9.8588379,6.5347025],[-9.8610252,6.5344904],[-9.8667383,6.5351483],[-9.8692183,6.5354339],[-9.8654651,6.5414785],[-9.865218,6.5438659],[-9.8667362,6.5501448],[-9.8653679,6.5579362],[-9.8641255,6.5659787],[-9.8649894,6.5697878],[-9.8675987,6.56944],[-9.8659055,6.5782874],[-9.8640629,6.5850901],[-9.8640331,6.5852004],[-9.8656981,6.5884571],[-9.8640643,6.5954091],[-9.8693309,6.6148354],[-9.8718152,6.6253926],[-9.8731921,6.6230339],[-9.8737626,6.6228893],[-9.881414,6.6209481],[-9.8873911,6.6090347],[-9.8906445,6.6056365],[-9.8928063,6.6067129],[-9.9009564,6.6148331],[-9.9073813,6.6204536],[-9.9205379,6.628251],[-9.922524,6.628462],[-9.9236795,6.6414692],[-9.9168131,6.6557768],[-9.9147912,6.666757],[-9.9189556,6.6782558],[-9.921138,6.6794901],[-9.9232428,6.6806213],[-9.9253478,6.6816688],[-9.9300685,6.6813739],[-9.9319625,6.6815931],[-9.9325416,6.6812194],[-9.9331089,6.6811839],[-9.9401196,6.6764915],[-9.9416556,6.6754637],[-9.9423319,6.675234],[-9.9524241,6.6727278],[-9.952817,6.6727141],[-9.9562886,6.6725915],[-9.9574118,6.6734706],[-9.9582613,6.6736103],[-9.9619498,6.6770215],[-9.963684,6.6786252],[-9.9681579,6.6827624],[-9.9745661,6.6841421],[-9.9776711,6.6851783],[-9.9783356,6.6849537],[-9.9789819,6.6850926],[-9.9905689,6.6808139],[-9.9909476,6.6806102],[-9.9990917,6.6762669],[-9.9994702,6.6760649],[-10.0056077,6.679191],[-10.0068431,6.6797453],[-10.0094321,6.6799683],[-10.0148411,6.6804343],[-10.0219884,6.6822183],[-10.0286669,6.6878991],[-10.0292627,6.6879883],[-10.0350862,6.688858],[-10.036242,6.6884966],[-10.040135,6.6872798],[-10.0419027,6.6867271],[-10.0439714,6.6853141],[-10.0443952,6.6850972],[-10.0446995,6.6848829],[-10.0477745,6.682717],[-10.0494842,6.6822],[-10.0516106,6.6810078],[-10.0538312,6.6808861],[-10.0548259,6.6805855],[-10.0557059,6.6805661],[-10.0560651,6.6796885],[-10.0560634,6.6788853],[-10.0562999,6.6782901],[-10.0634992,6.6798738],[-10.064699,6.6802906],[-10.0704112,6.681376],[-10.0706312,6.6815101],[-10.0739658,6.6810754],[-10.0741723,6.681291],[-10.0758081,6.6818815],[-10.0777844,6.6818772],[-10.0888492,6.686556],[-10.0950735,6.6904307],[-10.0983502,6.6905325],[-10.101338,6.6905258],[-10.1031331,6.6905218],[-10.1035818,6.6905208],[-10.1046146,6.6905648],[-10.1050712,6.6905842],[-10.1142629,6.6919076],[-10.1147049,6.6918479],[-10.1163902,6.6959999],[-10.1196686,6.6967364],[-10.1184932,6.6974211],[-10.1173065,6.6981125],[-10.1180431,6.699424],[-10.1183666,6.6995753],[-10.1220459,6.7012961],[-10.1230797,6.7015362],[-10.124263,6.7012108],[-10.1257394,6.7011537],[-10.1295301,6.7026249],[-10.1308064,6.7017277],[-10.133726,6.7000506],[-10.1349987,6.7000651],[-10.1354468,6.7000703],[-10.1374475,6.699497],[-10.1390004,6.7001118],[-10.1415049,6.7011032],[-10.1466797,6.7031521],[-10.1475701,6.7034711],[-10.1569816,6.6981236],[-10.1583754,6.6973318],[-10.1612017,6.695653],[-10.1635702,6.6933004],[-10.1690025,6.6947488],[-10.1748536,6.6966137],[-10.1751863,6.6972749],[-10.1758936,6.6986807],[-10.1763225,6.6995332],[-10.1758267,6.7009849],[-10.1756139,6.7016077],[-10.1752293,6.702733],[-10.1718645,6.7066769],[-10.1734637,6.7121098],[-10.1737974,6.7131027],[-10.1749059,6.7164012],[-10.1755958,6.7184537],[-10.1754412,6.7199967],[-10.175064,6.7213667],[-10.1751266,6.7233348],[-10.1747331,6.7263689],[-10.1746703,6.7268535],[-10.1746187,6.727251],[-10.1745013,6.7275882],[-10.1741621,6.7291333],[-10.172256,6.7374619],[-10.1718237,6.7392091],[-10.1709967,6.7427598],[-10.1682302,6.7464898],[-10.1680656,6.7467118],[-10.1634268,6.7504107],[-10.1619707,6.7515718],[-10.1495226,6.7523695],[-10.1456978,6.7599073],[-10.1457068,6.7637404],[-10.145717,6.7680505],[-10.1504049,6.7747966],[-10.1502053,6.7811004],[-10.1416801,6.7966597],[-10.1406497,6.7985406],[-10.1394727,6.8004172],[-10.139116,6.8010494],[-10.1344393,6.8094094],[-10.1218754,6.8271086],[-10.1217418,6.8315655],[-10.1216902,6.8332935],[-10.1156545,6.8321016],[-10.1087909,6.8329752],[-10.1063998,6.8350333],[-10.1036016,6.8394715],[-10.0970052,6.8446905],[-10.0882023,6.848313],[-10.0793935,6.849534],[-10.0724132,6.8513812],[-10.0724311,6.8516598],[-10.0730419,6.861231],[-10.0749656,6.8669564],[-10.0727512,6.8736457],[-10.0730874,6.881603],[-10.0724133,6.8989788],[-10.078767,6.8992111],[-10.112606,6.900148],[-10.1268181,6.9004527],[-10.1319704,6.9006952],[-10.144244,6.8991862],[-10.1483403,6.8964767],[-10.1591035,6.893998],[-10.1644642,6.8919398],[-10.1663655,6.89121],[-10.174003,6.8882768],[-10.1850619,6.8839473],[-10.1899664,6.8800473],[-10.1924267,6.8780905],[-10.1977909,6.8713167],[-10.2020126,6.8690236],[-10.2188237,6.8598935],[-10.2296697,6.8547515],[-10.2321822,6.8535603],[-10.2382864,6.8521637],[-10.245088,6.8506075],[-10.2564678,6.8396998],[-10.2584287,6.8378203],[-10.279183,6.8256344],[-10.2808092,6.82468],[-10.2812979,6.8243932],[-10.2865146,6.8208455],[-10.2940787,6.8200492],[-10.2985011,6.819584],[-10.3167867,6.81723],[-10.3258331,6.8157306],[-10.3309219,6.8148868],[-10.3363005,6.8129072],[-10.3405958,6.8113263],[-10.3439959,6.8063881],[-10.3447295,6.8053228],[-10.3447143,6.7998639],[-10.3447115,6.7988697],[-10.3451069,6.7981994],[-10.3525134,6.7856353],[-10.3575327,6.7839471],[-10.3581225,6.7837487],[-10.3621876,6.7823819],[-10.3667769,6.7746871],[-10.3778219,6.7719749],[-10.3777295,6.7717674],[-10.3778078,6.7701919],[-10.3744668,6.7672402],[-10.3740397,6.7668627],[-10.3723064,6.7657671],[-10.3718315,6.7654666],[-10.3717448,6.7654001],[-10.3742336,6.7616435],[-10.3779795,6.7570405],[-10.3785994,6.7547422],[-10.3782369,6.7543046],[-10.3774219,6.7533212],[-10.3759729,6.7515726],[-10.375666,6.7512021],[-10.3768971,6.7434749],[-10.3794026,6.7405677],[-10.3796027,6.7403359],[-10.3791669,6.7396866],[-10.3780566,6.7380319],[-10.3770863,6.7365855],[-10.3770997,6.7362259],[-10.3771495,6.7349211],[-10.3772088,6.7332989],[-10.3772697,6.7316579],[-10.3772805,6.7313662],[-10.3774047,6.7283126],[-10.3774127,6.7281164],[-10.3774727,6.7266416],[-10.3773706,6.7263384],[-10.3772626,6.7261058],[-10.3755852,6.722528],[-10.3783007,6.7207322],[-10.3791283,6.7201934],[-10.3796021,6.7199858],[-10.3822363,6.7188315],[-10.3827462,6.7186085],[-10.3832957,6.7173155],[-10.3830471,6.7162519],[-10.3847221,6.7158125],[-10.3851674,6.71454],[-10.3873638,6.7122159],[-10.3866901,6.7110352],[-10.3889858,6.7101104],[-10.391676,6.70783],[-10.3918833,6.7063491],[-10.3930357,6.7025402],[-10.3927129,6.7005611],[-10.3944013,6.6993644],[-10.3950311,6.6976715],[-10.3947107,6.6966149],[-10.3957514,6.6965904],[-10.3976318,6.692169],[-10.3972001,6.6871602],[-10.3986478,6.6865219],[-10.3996596,6.6860759],[-10.4003075,6.6857903],[-10.4035506,6.6843607],[-10.4038728,6.6842185],[-10.408466,6.6842054],[-10.4095012,6.6811004],[-10.4132651,6.6831482],[-10.4163,6.6799167],[-10.4168036,6.6793805],[-10.4204524,6.677909],[-10.4209744,6.6776983],[-10.422849,6.6770305],[-10.4239251,6.6766476],[-10.4245201,6.6764362],[-10.4266023,6.6745514],[-10.4318211,6.6743271],[-10.4322538,6.6722425],[-10.4325601,6.6707676],[-10.4326448,6.6703587],[-10.430703,6.6675388],[-10.4299194,6.6664005],[-10.4300421,6.6657349],[-10.4309006,6.6610813],[-10.4311524,6.6597173],[-10.4332269,6.655119],[-10.4365563,6.6513518],[-10.4344602,6.6484352],[-10.4350351,6.6474518],[-10.4351375,6.6472768],[-10.4359258,6.6445672],[-10.4362373,6.6438208],[-10.4365791,6.6438345],[-10.4366139,6.6429589],[-10.4367321,6.6399748],[-10.436143,6.6388783],[-10.435053,6.636849],[-10.4339004,6.6347029],[-10.4336623,6.6342593],[-10.433569,6.6339594],[-10.4332533,6.6332697],[-10.4325107,6.6304814],[-10.4323184,6.629759],[-10.4310214,6.6295537],[-10.4268349,6.6288914],[-10.4258438,6.6287343],[-10.4221664,6.6273838],[-10.4202016,6.6266913],[-10.4191082,6.6264396],[-10.4141438,6.6254274],[-10.4127255,6.6239234],[-10.4121682,6.6233327],[-10.4110031,6.6220965],[-10.4109438,6.6220378],[-10.4089094,6.6200151],[-10.4087091,6.6194482],[-10.4077977,6.6168672],[-10.4074364,6.6158446],[-10.4034526,6.6095932],[-10.4033683,6.6094607],[-10.4029401,6.6087881],[-10.4011257,6.605967],[-10.3999131,6.6040341],[-10.3996219,6.6035766],[-10.3969524,6.5993828],[-10.396523,6.5952093],[-10.3952008,6.5956539],[-10.3928014,6.5964609],[-10.3915068,6.5951741],[-10.3912491,6.5936522],[-10.3900628,6.5928947],[-10.3891747,6.5922398],[-10.3864787,6.5868851],[-10.3854304,6.5848029],[-10.3835313,6.5828553],[-10.3825039,6.5814977],[-10.3822464,6.5801447],[-10.3810597,6.5792176],[-10.3792592,6.5784736],[-10.3787317,6.5779325],[-10.3785662,6.5774259],[-10.3782016,6.5763095],[-10.3774518,6.5740134],[-10.3764395,6.5709136],[-10.3764547,6.570718],[-10.3768204,6.5660679],[-10.3761107,6.5636678],[-10.375305,6.5625294],[-10.3741626,6.560851],[-10.3751382,6.5603594],[-10.3752938,6.558136],[-10.375495,6.555259],[-10.3753261,6.5547909],[-10.3752877,6.5542727],[-10.3747811,6.5534731],[-10.3720624,6.5491809],[-10.3719727,6.5490393],[-10.3709775,6.54441],[-10.370493,6.5421549],[-10.3704901,6.541107],[-10.3704828,6.5384352],[-10.3704607,6.5383957],[-10.3701964,6.5361875],[-10.3707383,6.5359345],[-10.370886,6.5348789],[-10.3702669,6.5344883],[-10.3708102,6.5326775],[-10.3709093,6.5323472],[-10.3710894,6.5312037],[-10.3710845,6.5294194],[-10.3703403,6.5283345],[-10.3685717,6.5257551],[-10.3679411,6.5248355],[-10.369066,6.5237822],[-10.3720635,6.5209757],[-10.3728262,6.5202906],[-10.3767327,6.5162],[-10.3770747,6.515842],[-10.3762457,6.5085592],[-10.3766013,6.5069603],[-10.3770795,6.5048135],[-10.3775415,6.5038904],[-10.3776258,6.5037217],[-10.3777723,6.5038513],[-10.3783532,6.5037531],[-10.3797312,6.5035193],[-10.3806817,6.5031838],[-10.3822629,6.5029765],[-10.3823352,6.5029673],[-10.3811609,6.4963359],[-10.3841242,6.4895717],[-10.3841241,6.4895141],[-10.3839685,6.4875796],[-10.383926,6.48706],[-10.3849054,6.4839124],[-10.3849757,6.4837783],[-10.3854581,6.4828551],[-10.3859976,6.4835477],[-10.3877748,6.4840504],[-10.3880756,6.4839925],[-10.3893382,6.4837499],[-10.3896917,6.4834539],[-10.3907066,6.4826033],[-10.3916742,6.480697],[-10.3919715,6.4799981],[-10.3920335,6.4798521],[-10.3915511,6.4795098],[-10.3913929,6.4793972],[-10.3908211,6.4788036],[-10.3907402,6.4781713],[-10.39069,6.4777775],[-10.3906747,6.4776572],[-10.3906513,6.4771734],[-10.3912583,6.4757751],[-10.3918929,6.4743139],[-10.3907728,6.4730407],[-10.3902713,6.4723169],[-10.3891321,6.4706724],[-10.3889285,6.4692757],[-10.3887678,6.4681712],[-10.3890056,6.4664726],[-10.3891822,6.4652139],[-10.3892753,6.4651769],[-10.3902747,6.4647802],[-10.3948003,6.4629823],[-10.3961384,6.4623835],[-10.3961353,6.4622902],[-10.3961131,6.4615996],[-10.3960439,6.4594412],[-10.3956946,6.458678],[-10.3957963,6.4555978],[-10.3958195,6.4548923],[-10.3940124,6.4494107],[-10.3933109,6.4473247],[-10.3920917,6.4378984],[-10.3909355,6.4288902],[-10.3955804,6.4144978],[-10.3970829,6.41223],[-10.3987786,6.4096705],[-10.4034031,6.4026899],[-10.4048336,6.4008162],[-10.4041556,6.3998781],[-10.4036795,6.3992192],[-10.4018384,6.3959986],[-10.4013179,6.3936656],[-10.400713,6.3909536],[-10.3998224,6.3873341],[-10.3987675,6.3830458],[-10.3984486,6.382339],[-10.3983,6.3820099],[-10.3979007,6.3811253],[-10.3984448,6.3809198],[-10.3984446,6.3808565],[-10.4035666,6.3713728],[-10.4050869,6.3677179],[-10.4052426,6.3677203],[-10.4052961,6.367571],[-10.4089729,6.3677729],[-10.4131026,6.3680002],[-10.4087556,6.3844028],[-10.4082933,6.3845544],[-10.411439,6.3921322],[-10.4118848,6.391525],[-10.4119013,6.3915629],[-10.421475,6.3790283],[-10.4227813,6.378451],[-10.4371418,6.3725776],[-10.4460911,6.369635],[-10.4463499,6.36955],[-10.4470143,6.3698534],[-10.44701,6.3700365],[-10.4473206,6.3701724],[-10.4517246,6.3716273],[-10.4518083,6.3716548],[-10.4544854,6.3718908],[-10.4551904,6.3719527],[-10.4559405,6.3723994],[-10.4559572,6.372414],[-10.4580214,6.3742395],[-10.4584589,6.3746265],[-10.4645189,6.3776824],[-10.4656511,6.3782332],[-10.467005,6.3756581],[-10.4819869,6.3641201],[-10.4874195,6.3688121],[-10.5031858,6.3722198],[-10.5048664,6.3725828],[-10.5050428,6.3726095],[-10.5072541,6.3729455],[-10.5166616,6.3743756],[-10.518926,6.3752873],[-10.5262268,6.3782263],[-10.5304573,6.3810481],[-10.5326803,6.3831005],[-10.5348976,6.3851467],[-10.5362336,6.3862567],[-10.540264,6.3862446],[-10.5415052,6.3862409],[-10.5423275,6.3862384],[-10.5516696,6.3878584],[-10.5520628,6.3848369],[-10.5577859,6.3844376],[-10.5596696,6.3843064],[-10.5612797,6.3840246],[-10.5699493,6.3825061],[-10.5717095,6.3821978],[-10.577285,6.3809125],[-10.577564,6.3806184],[-10.5785787,6.3795482],[-10.5790543,6.3790466],[-10.5832479,6.3723499],[-10.5842229,6.3707791],[-10.5920323,6.3600903],[-10.5923932,6.3595964],[-10.5949425,6.3583513],[-10.6085159,6.3565714],[-10.6131487,6.3552608],[-10.6144856,6.354061],[-10.6286616,6.3509754],[-10.6292504,6.3508469],[-10.6418685,6.3458862],[-10.6423333,6.3457033],[-10.6445887,6.3457329],[-10.6457841,6.3450588],[-10.6495669,6.3429263],[-10.6518664,6.3412639]]]]}]}
