# Supplementary material
Source: ML conference proceedings conference paper supplement (https://proceedings.neurips.cc/paper_files/paper/2022/hash/9d3faa41886997cfc2128b930077fa49-Abstract.html)
Supplement: Supplementary file 1 [file 9d3faa41886997cfc2128b930077fa49-Supplemental-Conference.zip › code/ebola/map/geojson/montserrado.geojson]

{"type":"GeometryCollection","geometries":[{"type":"MultiPolygon","coordinates":[[[[-10.9590916,6.5257226],[-10.9581328,6.5253762],[-10.9576231,6.525099],[-10.9570653,6.5246541],[-10.956663,6.5243609],[-10.9564806,6.5241211],[-10.9563571,6.5238705],[-10.9561936,6.5234042],[-10.9560877,6.5231164],[-10.9559937,6.5229338],[-10.95592,6.5228326],[-10.9557697,6.5226806],[-10.955173,6.5222743],[-10.9550121,6.5221158],[-10.9549289,6.5219812],[-10.9548766,6.5218227],[-10.9548699,6.5217134],[-10.9548927,6.5214389],[-10.9548859,6.5213189],[-10.9548511,6.521211],[-10.9547103,6.5210352],[-10.9544958,6.5208512],[-10.9542328,6.5206407],[-10.9530219,6.51988],[-10.9520629,6.5193163],[-10.950915,6.5186928],[-10.9490402,6.5176268],[-10.9481148,6.5171072],[-10.9468139,6.5163556],[-10.9435067,6.5146287],[-10.9417016,6.5135549],[-10.9400761,6.5125661],[-10.9389094,6.5118919],[-10.9367851,6.5107301],[-10.9351516,6.5098239],[-10.932928,6.5084808],[-10.9316594,6.5077401],[-10.9307286,6.5072416],[-10.9299992,6.5069006],[-10.9290388,6.5064714],[-10.928591,6.5062504],[-10.9282637,6.5060211],[-10.9277326,6.5055307],[-10.9272042,6.5050697],[-10.9267134,6.5047366],[-10.9261769,6.5042196],[-10.9260374,6.5039491],[-10.9259839,6.5037773],[-10.9257935,6.5034362],[-10.9255494,6.5031723],[-10.9248279,6.502754],[-10.9238167,6.502173],[-10.9232078,6.5018825],[-10.9218532,6.5011682],[-10.9204397,6.5004433],[-10.9179425,6.4989696],[-10.9165371,6.4981142],[-10.9153032,6.4974292],[-10.9144826,6.4969257],[-10.9140051,6.4966299],[-10.9132004,6.4961394],[-10.9126479,6.4957531],[-10.9116575,6.4950644],[-10.9109634,6.4945777],[-10.9103574,6.4941275],[-10.91012,6.4938689],[-10.9099738,6.4936211],[-10.9098544,6.4933639],[-10.9098114,6.4931812],[-10.9098048,6.4929482],[-10.9098048,6.4926963],[-10.9098263,6.4924831],[-10.9098128,6.4924005],[-10.9097591,6.4922991],[-10.9096881,6.4922459],[-10.9094748,6.4921472],[-10.9092094,6.4919608],[-10.9090055,6.4917849],[-10.9085576,6.4914118],[-10.9075436,6.4907508],[-10.906967,6.4903644],[-10.9063447,6.4899086],[-10.9049125,6.4890666],[-10.9036946,6.4883149],[-10.9018654,6.4872489],[-10.8998537,6.4859484],[-10.8983518,6.4848345],[-10.897496,6.484296],[-10.896485,6.4836885],[-10.8955569,6.4831662],[-10.8945859,6.4825318],[-10.8930195,6.4815831],[-10.8916864,6.4807808],[-10.8895111,6.4795149],[-10.8881379,6.4786435],[-10.8875263,6.4782064],[-10.8855575,6.4766713],[-10.8842996,6.4756452],[-10.883369,6.4749044],[-10.8822424,6.4741529],[-10.8810246,6.473268],[-10.8792866,6.4719355],[-10.8779159,6.4709973],[-10.8752739,6.4693502],[-10.8727381,6.4676571],[-10.8717509,6.4669531],[-10.8706532,6.4661574],[-10.8700161,6.4657311],[-10.8694267,6.465332],[-10.8686972,6.4648248],[-10.8684021,6.4646184],[-10.8673225,6.4638135],[-10.8669309,6.4635017],[-10.866544,6.4632037],[-10.8660096,6.4628527],[-10.8647972,6.4619679],[-10.8635621,6.4610256],[-10.8621606,6.459877],[-10.8609028,6.4588576],[-10.8600028,6.4580879],[-10.8593471,6.4575263],[-10.8587421,6.4569705],[-10.857861,6.4561417],[-10.8571301,6.4554327],[-10.8563778,6.4546719],[-10.8560908,6.4543693],[-10.8558118,6.4540722],[-10.8554149,6.4536845],[-10.8551198,6.4534019],[-10.854625,6.4529262],[-10.8541355,6.4524397],[-10.8537425,6.452012],[-10.8535722,6.4518],[-10.8535031,6.4517315],[-10.8534783,6.4516895],[-10.85343,6.4516056],[-10.8533543,6.4515163],[-10.853245,6.4513684],[-10.853194,6.4512591],[-10.8531015,6.4510605],[-10.8529714,6.450834],[-10.8527596,6.4504289],[-10.8525234,6.4501276],[-10.8524002,6.4500158],[-10.8520527,6.4497919],[-10.851641,6.4495253],[-10.8514854,6.4493828],[-10.8513728,6.4492575],[-10.8512026,6.4489843],[-10.8510791,6.4487857],[-10.8508981,6.4485832],[-10.8507465,6.4484206],[-10.8494577,6.4472798],[-10.8490232,6.4468561],[-10.8486048,6.4463377],[-10.8482963,6.4459406],[-10.8481529,6.4458087],[-10.8478082,6.4455608],[-10.8475668,6.4453476],[-10.84719,6.4448852],[-10.8470532,6.4446733],[-10.8469538,6.4444801],[-10.8469243,6.4443334],[-10.8469124,6.4440836],[-10.8469297,6.4440283],[-10.8469632,6.443977],[-10.8469887,6.4439077],[-10.846982,6.4438617],[-10.8469082,6.4437191],[-10.8467783,6.4434366],[-10.8465917,6.4430155],[-10.8465341,6.4428982],[-10.8464576,6.4428023],[-10.846406,6.4427203],[-10.8463705,6.4426264],[-10.8462659,6.4423732],[-10.8461612,6.4421666],[-10.8460754,6.4420014],[-10.8459641,6.441848],[-10.8458367,6.4416802],[-10.8457609,6.4415509],[-10.8455873,6.4412977],[-10.8452977,6.4409419],[-10.8450602,6.4405608],[-10.8449369,6.4403662],[-10.844902,6.4402449],[-10.8449194,6.4400144],[-10.844914,6.4399343],[-10.8448792,6.4398665],[-10.8446914,6.4396785],[-10.8445936,6.439544],[-10.8443011,6.4390762],[-10.8441658,6.4388883],[-10.8439921,6.4387257],[-10.8437781,6.4385525],[-10.8435233,6.4383966],[-10.8434724,6.4383406],[-10.8434174,6.438236],[-10.8433464,6.4381374],[-10.8432659,6.4380614],[-10.8432095,6.4379848],[-10.8431558,6.4378062],[-10.843074,6.4376689],[-10.8429293,6.437517],[-10.8428755,6.4374383],[-10.8428299,6.4373251],[-10.8427401,6.4371251],[-10.8427234,6.4371072],[-10.8426966,6.4370992],[-10.8426234,6.4370919],[-10.8425471,6.4370466],[-10.8424934,6.4369813],[-10.8424049,6.4368214],[-10.8422439,6.4365895],[-10.8421487,6.4364429],[-10.8419691,6.4360831],[-10.8418617,6.4359298],[-10.8416109,6.4356979],[-10.8415238,6.435562],[-10.8414796,6.4354341],[-10.8414594,6.4353808],[-10.8414044,6.4353141],[-10.8411562,6.4351088],[-10.8410088,6.4349483],[-10.8409331,6.4348317],[-10.8408868,6.4347304],[-10.8408761,6.4346292],[-10.840872,6.4345359],[-10.8408512,6.4344626],[-10.8407432,6.4343066],[-10.840636,6.4342167],[-10.8405549,6.4341687],[-10.8404885,6.4341094],[-10.8403745,6.4339602],[-10.8399466,6.433395],[-10.8396838,6.4330753],[-10.8395846,6.432894],[-10.8394733,6.4327088],[-10.839134,6.4322797],[-10.8389998,6.4320745],[-10.8389033,6.4318199],[-10.8388443,6.4316014],[-10.8388027,6.4314148],[-10.8387517,6.4313268],[-10.8384768,6.4310896],[-10.8381723,6.4308376],[-10.8379565,6.4306099],[-10.8375997,6.430218],[-10.8373034,6.4298063],[-10.837133,6.4295597],[-10.8369372,6.4293571],[-10.8367414,6.4292012],[-10.835757,6.4282936],[-10.8350181,6.4277566],[-10.8346372,6.4274647],[-10.8343274,6.4272235],[-10.8336462,6.4267891],[-10.8325249,6.426028],[-10.8319482,6.4255817],[-10.8307172,6.4246275],[-10.8302679,6.424313],[-10.8296456,6.4238252],[-10.8287403,6.4230389],[-10.827768,6.4222632],[-10.8268145,6.4215342],[-10.8259724,6.4207693],[-10.8250027,6.4198804],[-10.8237971,6.4189222],[-10.8217023,6.4170578],[-10.8209727,6.4164208],[-10.8203558,6.4158677],[-10.8197295,6.4152546],[-10.8190067,6.4144497],[-10.8186942,6.4141018],[-10.8183079,6.4136367],[-10.8180987,6.4134328],[-10.8178587,6.4132143],[-10.8175958,6.4129104],[-10.816995,6.4122147],[-10.8163754,6.4115644],[-10.8162279,6.4113884],[-10.8160509,6.4111512],[-10.8157397,6.4106848],[-10.8154407,6.4101636],[-10.8153159,6.4099651],[-10.8151577,6.4097412],[-10.8148573,6.4093081],[-10.8145421,6.4088016],[-10.8143356,6.4084631],[-10.8142109,6.4082804],[-10.8139292,6.4079234],[-10.8135993,6.4074809],[-10.8130629,6.4066466],[-10.8126471,6.4059189],[-10.8123762,6.4053072],[-10.8120463,6.404413],[-10.8118787,6.4039452],[-10.811809,6.4037013],[-10.8117768,6.4034547],[-10.8117862,6.4032082],[-10.8118224,6.4030162],[-10.8118747,6.4028403],[-10.8119337,6.402741],[-10.8120141,6.4026697],[-10.8120926,6.4026364],[-10.8121389,6.4026351],[-10.8122187,6.4026724],[-10.8122804,6.402735],[-10.8123152,6.4027424],[-10.8123394,6.4027297],[-10.8123555,6.4026971],[-10.8123642,6.4026258],[-10.812336,6.4022772],[-10.8122381,6.4016862],[-10.8121174,6.4012317],[-10.8120839,6.4010504],[-10.8120544,6.4007679],[-10.8120571,6.4006185],[-10.8120866,6.4003474],[-10.8120846,6.4002181],[-10.8120524,6.4000882],[-10.8118613,6.3996897],[-10.8116681,6.3993245],[-10.8115501,6.3991739],[-10.8113919,6.3990393],[-10.811121,6.3988767],[-10.8108139,6.3986515],[-10.8106301,6.3984982],[-10.810441,6.3982823],[-10.8100897,6.3978625],[-10.8099757,6.3976679],[-10.8099328,6.3974614],[-10.8099381,6.3973514],[-10.8099669,6.3972513],[-10.8100072,6.3971895],[-10.8100293,6.3971748],[-10.8100588,6.3971721],[-10.810088,6.3971918],[-10.8101416,6.3972748],[-10.8101899,6.3973181],[-10.8102073,6.3973211],[-10.8102231,6.3973144],[-10.8102301,6.3972971],[-10.8102288,6.3972824],[-10.8101969,6.3972301],[-10.8101782,6.3971735],[-10.8101661,6.3970872],[-10.8101654,6.3970659],[-10.8101741,6.3970465],[-10.8102033,6.3970062],[-10.8102077,6.3969761],[-10.8102037,6.3969462],[-10.8101701,6.3968596],[-10.8101104,6.3967737],[-10.8100011,6.3966917],[-10.8099804,6.3966617],[-10.8099462,6.3965631],[-10.8098268,6.3963019],[-10.8096954,6.3960246],[-10.809568,6.3958101],[-10.8091911,6.3953369],[-10.8087874,6.3948838],[-10.8084709,6.3946173],[-10.807964,6.3942161],[-10.80761,6.3938389],[-10.8073458,6.3935177],[-10.8068588,6.3929819],[-10.8064928,6.3925288],[-10.8061119,6.3920024],[-10.8059643,6.3918317],[-10.8056492,6.3915278],[-10.8053368,6.3911321],[-10.8052133,6.3909414],[-10.8050391,6.3906163],[-10.8049559,6.3903684],[-10.8048701,6.3900552],[-10.8047749,6.389754],[-10.8047225,6.389526],[-10.8046903,6.3894194],[-10.804642,6.3893421],[-10.8045307,6.3892221],[-10.8043739,6.389021],[-10.8041149,6.3885704],[-10.8039072,6.3881467],[-10.803726,6.3877027],[-10.8036081,6.3873137],[-10.8034417,6.3869644],[-10.8032943,6.3866473],[-10.8030099,6.3861567],[-10.8028115,6.3857809],[-10.8027215,6.3855823],[-10.8026303,6.3853624],[-10.8025338,6.3850145],[-10.8024735,6.3847094],[-10.8024011,6.3840364],[-10.8023796,6.3836152],[-10.8022977,6.383002],[-10.8022375,6.3826036],[-10.8021408,6.3820451],[-10.8021302,6.3818866],[-10.8021838,6.381732],[-10.8022455,6.38166],[-10.8023393,6.3816032],[-10.8023703,6.3815687],[-10.8023809,6.381508],[-10.8023621,6.381454],[-10.8020745,6.3813741],[-10.8006081,6.3801167],[-10.8000267,6.3796075],[-10.7985749,6.3788399],[-10.7987171,6.3786839],[-10.7985884,6.3783266],[-10.7985455,6.3780735],[-10.798481,6.3776736],[-10.7983979,6.3772897],[-10.7983443,6.3769246],[-10.7982637,6.3763115],[-10.7982129,6.3758103],[-10.7981753,6.3752852],[-10.798178,6.3748907],[-10.7981458,6.3746347],[-10.7980439,6.3744109],[-10.7976308,6.3738644],[-10.7972392,6.3733286],[-10.7968288,6.3727742],[-10.796515,6.3723103],[-10.7961851,6.3717319],[-10.7959705,6.3713],[-10.7957747,6.3709163],[-10.7955467,6.3704125],[-10.7953214,6.3699299],[-10.7951471,6.3695007],[-10.7950076,6.3691702],[-10.7948078,6.3686157],[-10.794734,6.3684504],[-10.7946187,6.3682319],[-10.7945503,6.3680666],[-10.794498,6.367884],[-10.7944095,6.3675642],[-10.7943076,6.3672922],[-10.7940393,6.3666086],[-10.7938047,6.3659927],[-10.7936558,6.3655942],[-10.7935029,6.3651557],[-10.7934358,6.3649691],[-10.7933607,6.3647346],[-10.7932307,6.3642308],[-10.7931475,6.3639362],[-10.7930845,6.363659],[-10.7929839,6.3632151],[-10.7929598,6.3630445],[-10.792945,6.3628792],[-10.7929762,6.3625759],[-10.7930039,6.3624606],[-10.7930195,6.3623127],[-10.7930381,6.3619956],[-10.7930081,6.3617437],[-10.7930602,6.3615392],[-10.7930731,6.3612038],[-10.7931791,6.3609692],[-10.7931589,6.3607933],[-10.7932448,6.3606893],[-10.7933279,6.3605934],[-10.7933601,6.3605108],[-10.7932508,6.3603202],[-10.7932186,6.3597671],[-10.7931905,6.3596137],[-10.7930592,6.3593211],[-10.7930129,6.3591322],[-10.7930116,6.3589189],[-10.7930192,6.3587165],[-10.7930737,6.3586925],[-10.7932307,6.3585742],[-10.79405,6.3582528],[-10.7958525,6.3574492],[-10.7970567,6.3569333],[-10.7986929,6.3561882],[-10.8015199,6.3549207],[-10.8036804,6.353953],[-10.8055701,6.3531246],[-10.8062795,6.3527987],[-10.8076167,6.3521923],[-10.8087713,6.3517031],[-10.8095036,6.3513939],[-10.8101366,6.3510913],[-10.8109526,6.3507135],[-10.8111223,6.3506462],[-10.8111927,6.3506095],[-10.8112194,6.3505725],[-10.8112289,6.3505415],[-10.8112275,6.3505149],[-10.8112094,6.3504569],[-10.8111611,6.3503783],[-10.8111048,6.3503336],[-10.8110713,6.3503303],[-10.8110358,6.3503476],[-10.8109979,6.3503882],[-10.8109616,6.3504372],[-10.8109258,6.3504955],[-10.8108634,6.3505519],[-10.8106616,6.3506375],[-10.8100682,6.3508701],[-10.8096322,6.35109],[-10.8068883,6.3522869],[-10.8045012,6.3533479],[-10.8024707,6.3542516],[-10.7999562,6.3553925],[-10.7987184,6.3559283],[-10.7976214,6.3564055],[-10.7972284,6.3566027],[-10.7969098,6.3567476],[-10.7966488,6.356861],[-10.7966001,6.3568842],[-10.7964035,6.3569588],[-10.796261,6.3570205],[-10.7959952,6.3571359],[-10.7957412,6.3572599],[-10.7956901,6.3572598],[-10.7956473,6.3572412],[-10.7955144,6.3571359],[-10.7953442,6.3569879],[-10.7952611,6.356928],[-10.79519,6.356828],[-10.7951645,6.3567787],[-10.7951565,6.356712],[-10.7952007,6.3565814],[-10.795202,6.3565241],[-10.7951565,6.3564708],[-10.7950948,6.3564269],[-10.7950048,6.3563482],[-10.7949217,6.3562682],[-10.7947889,6.3561482],[-10.7945878,6.3559763],[-10.7944524,6.3558191],[-10.7943691,6.3557164],[-10.7943209,6.3556178],[-10.7943048,6.3554991],[-10.794282,6.3554272],[-10.7942323,6.3553792],[-10.7941452,6.3553365],[-10.794003,6.3552299],[-10.7938796,6.3551019],[-10.7937014,6.3548541],[-10.7935418,6.3546221],[-10.7934586,6.3544475],[-10.7934169,6.3542836],[-10.7933862,6.3540491],[-10.7933567,6.3538491],[-10.7933607,6.3537344],[-10.7933929,6.3536226],[-10.7934479,6.3535372],[-10.7934935,6.3534745],[-10.7935431,6.3534333],[-10.7936558,6.3534199],[-10.7937926,6.3534345],[-10.7938569,6.3534265],[-10.7939092,6.3533959],[-10.7939629,6.3533347],[-10.7940902,6.353172],[-10.7942739,6.3528934],[-10.794439,6.3525988],[-10.7944792,6.3524803],[-10.794506,6.3522736],[-10.7945314,6.3520377],[-10.7945489,6.3517738],[-10.7945603,6.3515106],[-10.7945593,6.3514212],[-10.7945707,6.3513642],[-10.7945818,6.3513419],[-10.7946019,6.3513187],[-10.7946361,6.3512914],[-10.7946696,6.3512646],[-10.7946864,6.3512293],[-10.7947012,6.3511706],[-10.7947079,6.351116],[-10.7947058,6.3510693],[-10.794699,6.3510494],[-10.7946837,6.3510287],[-10.7946361,6.3509994],[-10.7945778,6.3509674],[-10.7945382,6.3509347],[-10.7945094,6.3508835],[-10.7944819,6.3507809],[-10.7944805,6.3506702],[-10.7944752,6.3505995],[-10.7944671,6.3505622],[-10.7944484,6.3505369],[-10.7944256,6.3505229],[-10.794386,6.3505063],[-10.7943189,6.3504895],[-10.7942593,6.3504709],[-10.7942197,6.3504429],[-10.7941909,6.350409],[-10.7941775,6.350309],[-10.7941775,6.3499704],[-10.7941708,6.3496412],[-10.7941614,6.3492041],[-10.7941909,6.348619],[-10.7941909,6.348179],[-10.7942096,6.3478791],[-10.7942633,6.3474446],[-10.7943156,6.3469608],[-10.7943438,6.3467781],[-10.7943705,6.3466502],[-10.7944348,6.3465369],[-10.7944779,6.3464437],[-10.7945466,6.3462214],[-10.79458,6.3459424],[-10.7947577,6.3453076],[-10.7949368,6.3451913],[-10.7951292,6.3448507],[-10.795251,6.3447823],[-10.7954782,6.3444444],[-10.7956834,6.3439472],[-10.7958484,6.3435527],[-10.7961207,6.3428901],[-10.796393,6.3422784],[-10.7967551,6.3413453],[-10.7973156,6.3400259],[-10.7973267,6.33999],[-10.7973233,6.3399742],[-10.7973104,6.3399602],[-10.797264,6.3399357],[-10.7972151,6.3399044],[-10.7971916,6.3398711],[-10.7971913,6.3398231],[-10.7972003,6.3397894],[-10.7972137,6.3397618],[-10.7972305,6.3397236],[-10.7972626,6.3396533],[-10.79855,6.3366067],[-10.7986384,6.3364309],[-10.798883,6.3359525],[-10.7991214,6.3353905],[-10.7994485,6.3353472],[-10.7997993,6.3353746],[-10.8000918,6.3354988],[-10.8004508,6.3356643],[-10.8007619,6.3357531],[-10.8010818,6.3360028],[-10.8020835,6.3369988],[-10.8023574,6.3372692],[-10.8026758,6.3380492],[-10.8028968,6.3385105],[-10.8034346,6.3392281],[-10.803997,6.3397244],[-10.8040194,6.3397432],[-10.8040439,6.3397657],[-10.8040903,6.3398066],[-10.8053649,6.3406413],[-10.8059985,6.3409781],[-10.8063889,6.3411539],[-10.8065878,6.3413003],[-10.8079287,6.3426842],[-10.8080982,6.3428453],[-10.8081571,6.3431822],[-10.8083781,6.3436215],[-10.8084739,6.3437094],[-10.808496,6.3438778],[-10.808275,6.3441048],[-10.8081129,6.3441121],[-10.8078919,6.3440608],[-10.8075456,6.3441487],[-10.8073762,6.3442146],[-10.8071478,6.3442146],[-10.8069562,6.3442805],[-10.8067868,6.3444343],[-10.8066689,6.3446832],[-10.8066468,6.3449102],[-10.8067205,6.3450859],[-10.8069194,6.3452544],[-10.8071109,6.3453129],[-10.8074277,6.3455546],[-10.8078403,6.3459646],[-10.8079228,6.3463209],[-10.8079188,6.3467751],[-10.8081406,6.3470371],[-10.8085958,6.3471624],[-10.8095937,6.347246],[-10.8102715,6.3472533],[-10.8108757,6.3470776],[-10.8117303,6.3469019],[-10.8120029,6.3469092],[-10.8121355,6.3470044],[-10.8121883,6.3470947],[-10.8122157,6.3471414],[-10.8122343,6.3471732],[-10.812526,6.3476707],[-10.812887,6.3483736],[-10.8129274,6.3484619],[-10.8128742,6.3487187],[-10.8129615,6.3488038],[-10.8130419,6.3488253],[-10.8130836,6.3488366],[-10.8132144,6.3487325],[-10.8131644,6.3483564],[-10.8129813,6.3479984],[-10.8126071,6.3473737],[-10.8119696,6.3465103],[-10.8113158,6.3457629],[-10.8107447,6.3451221],[-10.8100505,6.3444123],[-10.8092804,6.3431508],[-10.808801,6.3421696],[-10.8085429,6.3415911],[-10.8083361,6.3411379],[-10.8080559,6.3404108],[-10.8078712,6.3394394],[-10.8077996,6.3387837],[-10.8078004,6.3382943],[-10.8074719,6.3378892],[-10.8072744,6.3373494],[-10.807009,6.336597],[-10.8066421,6.3361223],[-10.8063079,6.3359049],[-10.8059819,6.3356818],[-10.8057887,6.33545],[-10.8056975,6.3353405],[-10.805579,6.3353456],[-10.8054299,6.3354766],[-10.8053354,6.3356255],[-10.8051807,6.3358305],[-10.8050849,6.335977],[-10.8050186,6.3362772],[-10.8049523,6.3364383],[-10.804827,6.3365042],[-10.8047976,6.336614],[-10.8047239,6.3367678],[-10.8046797,6.337046],[-10.8047239,6.337273],[-10.8047828,6.3374195],[-10.8047828,6.3376758],[-10.8048565,6.3379101],[-10.804827,6.3381224],[-10.8049523,6.3383787],[-10.8051954,6.3385984],[-10.8055196,6.3389865],[-10.8055859,6.3392061],[-10.8057627,6.339499],[-10.8058658,6.3397407],[-10.8058437,6.3398632],[-10.8057867,6.3399311],[-10.8057063,6.3399698],[-10.8055936,6.3399699],[-10.8055299,6.3399332],[-10.8045791,6.3389375],[-10.8036799,6.3380318],[-10.8022227,6.3366575],[-10.8015482,6.3359531],[-10.8013685,6.3357085],[-10.8012846,6.3355605],[-10.8011807,6.3354153],[-10.8010761,6.3352627],[-10.8009936,6.335184],[-10.8009038,6.3351234],[-10.8007093,6.3350021],[-10.8004847,6.3348401],[-10.8003848,6.3347548],[-10.8000173,6.3343783],[-10.7998892,6.3342057],[-10.7996813,6.3338404],[-10.7995499,6.3335572],[-10.7995104,6.3333799],[-10.7995016,6.333234],[-10.7995197,6.3331087],[-10.799556,6.3329327],[-10.7995834,6.3327574],[-10.7995821,6.3325894],[-10.7995855,6.3325101],[-10.7996069,6.3324155],[-10.7996418,6.3322981],[-10.7996485,6.3322315],[-10.7996445,6.3321222],[-10.7996559,6.3318943],[-10.7996653,6.3318271],[-10.7997223,6.331583],[-10.7997611,6.3314838],[-10.7997873,6.3313771],[-10.7998041,6.3312651],[-10.7998215,6.3311026],[-10.7998718,6.3309019],[-10.7998986,6.3308373],[-10.7999818,6.330616],[-10.7999918,6.330602],[-10.8000123,6.3305947],[-10.800034,6.3305929],[-10.8000394,6.3305898],[-10.8001507,6.3304134],[-10.800219,6.3302979],[-10.80023,6.3302923],[-10.8002473,6.3302866],[-10.8002604,6.3302814],[-10.8002684,6.3302724],[-10.8002919,6.3302334],[-10.8003103,6.3302078],[-10.8003324,6.3301826],[-10.8003613,6.3301508],[-10.8003747,6.3301135],[-10.8003848,6.3300595],[-10.8003921,6.3300176],[-10.8004614,6.3298038],[-10.8015658,6.3299735],[-10.8026438,6.3302715],[-10.8029255,6.3305661],[-10.803183,6.3307994],[-10.8033587,6.3309352],[-10.8035692,6.3309846],[-10.8038562,6.3310033],[-10.8041231,6.3309593],[-10.8043806,6.330894],[-10.8047525,6.330754],[-10.8052188,6.3304885],[-10.8053515,6.3302914],[-10.8053997,6.3300846],[-10.8054723,6.329922],[-10.8055246,6.3298087],[-10.8055514,6.3298153],[-10.8056867,6.3296567],[-10.8057298,6.3296501],[-10.8060302,6.3292822],[-10.8061106,6.3292635],[-10.8064191,6.3291196],[-10.8064861,6.3291275],[-10.8067516,6.3291542],[-10.8067759,6.3293409],[-10.806875,6.3295034],[-10.806741,6.329714],[-10.8062796,6.329634],[-10.8060328,6.3298889],[-10.8058826,6.3301379],[-10.8057646,6.3301619],[-10.805432,6.3303511],[-10.8053864,6.3306711],[-10.8059873,6.3304391],[-10.8067597,6.3304951],[-10.8069502,6.3307111],[-10.8071379,6.3309536],[-10.8071781,6.3319283],[-10.8069904,6.332888],[-10.8066685,6.3332665],[-10.8062072,6.3336557],[-10.8056815,6.3340503],[-10.8057136,6.3342262],[-10.8058478,6.3344715],[-10.8062072,6.3346101],[-10.8064754,6.334818],[-10.8066792,6.3349567],[-10.8068348,6.3348713],[-10.8072854,6.3344768],[-10.8076073,6.3335438],[-10.8082894,6.3318572],[-10.8085878,6.330301],[-10.8086526,6.3296616],[-10.8087117,6.3289984],[-10.8087117,6.3289976],[-10.8088109,6.3282798],[-10.808889,6.3275088],[-10.8090706,6.3266691],[-10.8093369,6.3257791],[-10.8096358,6.3248829],[-10.8098996,6.3243475],[-10.8101419,6.3238218],[-10.8101476,6.3238109],[-10.8104622,6.3232245],[-10.8106453,6.3228998],[-10.8108977,6.3225396],[-10.8110583,6.3222532],[-10.8113683,6.3220833],[-10.8116264,6.3221217],[-10.811939,6.3221316],[-10.8128141,6.3222058],[-10.8136841,6.3223223],[-10.8141213,6.3225395],[-10.8143341,6.3226253],[-10.8146955,6.3226985],[-10.815081,6.3226232],[-10.8153983,6.322597],[-10.8157148,6.3225202],[-10.8160763,6.3223399],[-10.8165369,6.3219622],[-10.8168647,6.3215735],[-10.8170948,6.3211276],[-10.8171695,6.3207503],[-10.8172903,6.32003],[-10.8172903,6.3192926],[-10.8172443,6.3188524],[-10.8172558,6.318618],[-10.8174686,6.3179092],[-10.8174801,6.3174118],[-10.8174341,6.3166801],[-10.8176469,6.3158055],[-10.8177734,6.3151252],[-10.817877,6.3144392],[-10.8178482,6.3142963],[-10.8179345,6.3141191],[-10.8180668,6.3136275],[-10.8181128,6.3132159],[-10.8179862,6.3129643],[-10.8179805,6.3126271],[-10.817759,6.3124178],[-10.8174055,6.3116267],[-10.8171145,6.3115409],[-10.8165922,6.3111605],[-10.8146853,6.3099439],[-10.814467,6.3098348],[-10.8139343,6.3095688],[-10.8132932,6.3092487],[-10.8128626,6.3090336],[-10.8126252,6.3088972],[-10.8123307,6.3087278],[-10.8117928,6.3084186],[-10.8109765,6.3080325],[-10.8102726,6.3077194],[-10.8092809,6.3072241],[-10.8088746,6.3070507],[-10.8082027,6.3067526],[-10.8075256,6.3064129],[-10.8071276,6.3062397],[-10.8070569,6.306209],[-10.8067061,6.3059597],[-10.8064451,6.3058199],[-10.8058902,6.3055104],[-10.8051193,6.3050802],[-10.8049782,6.3049854],[-10.8047288,6.3048175],[-10.8046045,6.3047475],[-10.8041521,6.3045614],[-10.8035728,6.3042167],[-10.8033903,6.3041082],[-10.8029343,6.3037723],[-10.8025294,6.303535],[-10.8020599,6.3031324],[-10.8017272,6.3026482],[-10.8014805,6.302389],[-10.8013306,6.3020993],[-10.80133,6.3019391],[-10.8013358,6.3018552],[-10.8013538,6.3015887],[-10.8013671,6.3014972],[-10.8014224,6.3011713],[-10.8014387,6.3010096],[-10.8013533,6.3008843],[-10.8011662,6.3006377],[-10.8007758,6.3000879],[-10.8004504,6.299429],[-10.8002186,6.2987297],[-10.7999462,6.2982648],[-10.7995652,6.297659],[-10.7991299,6.2973535],[-10.798197,6.2966942],[-10.7975006,6.2961792],[-10.7968382,6.2958259],[-10.7967091,6.2957387],[-10.7964263,6.2954626],[-10.795755,6.2948073],[-10.7953221,6.2944893],[-10.7952615,6.2944374],[-10.7949634,6.2941252],[-10.7947074,6.2938571],[-10.7946297,6.2937428],[-10.7944921,6.2935397],[-10.7943518,6.2933414],[-10.7938589,6.2931937],[-10.7933212,6.2930259],[-10.7916375,6.2924115],[-10.790027,6.2917607],[-10.7883108,6.2911139],[-10.7858747,6.290079],[-10.7843577,6.2894363],[-10.7838487,6.2892188],[-10.7827832,6.2887377],[-10.7816038,6.2881556],[-10.7808554,6.2877433],[-10.7783584,6.2865629],[-10.7772684,6.2860212],[-10.7757809,6.2853052],[-10.7755522,6.2851966],[-10.7744385,6.284647],[-10.7740173,6.2844036],[-10.7733236,6.2840295],[-10.7729103,6.2837579],[-10.7725675,6.2835168],[-10.77194,6.2830751],[-10.771506,6.2826834],[-10.7712343,6.2824666],[-10.7709801,6.2822554],[-10.7704046,6.2817712],[-10.7699044,6.2813185],[-10.7687453,6.2802432],[-10.7681638,6.279556],[-10.7672446,6.278517],[-10.7670797,6.2783652],[-10.7668084,6.2780918],[-10.7664882,6.2777975],[-10.7658456,6.2773205],[-10.7653942,6.277086],[-10.7648208,6.2768434],[-10.7642636,6.2764837],[-10.7640074,6.2762775],[-10.7638074,6.276122],[-10.7636715,6.2759201],[-10.7636066,6.275728],[-10.7635356,6.2755175],[-10.76356,6.2751092],[-10.7635316,6.2748505],[-10.7634177,6.2747049],[-10.7630557,6.274519],[-10.7624213,6.2741915],[-10.7617543,6.27367],[-10.7610589,6.2732496],[-10.7603065,6.2728656],[-10.7594728,6.2725098],[-10.758086,6.272053],[-10.7567927,6.2716649],[-10.7561089,6.2714929],[-10.7551106,6.2712052],[-10.7546696,6.2710697],[-10.7541674,6.270913],[-10.7537126,6.2707653],[-10.753267,6.2706314],[-10.7527587,6.2705218],[-10.7525764,6.2704548],[-10.7522564,6.2702555],[-10.7521416,6.2701383],[-10.7520604,6.2700165],[-10.7520068,6.2699221],[-10.7519624,6.2699039],[-10.7518614,6.2699023],[-10.7516899,6.269811],[-10.7515628,6.2698339],[-10.7513572,6.2698659],[-10.7510867,6.2697962],[-10.7506205,6.2697607],[-10.7499057,6.2695949],[-10.749102,6.2694146],[-10.7484525,6.2692925],[-10.7478141,6.2691116],[-10.747453,6.2690456],[-10.7468478,6.2688764],[-10.7462357,6.2686896],[-10.7460154,6.2686019],[-10.7451025,6.2683629],[-10.7446618,6.268292],[-10.7442121,6.2680539],[-10.743788,6.2679166],[-10.7434378,6.2677843],[-10.7432223,6.2677438],[-10.7430137,6.2677107],[-10.7428613,6.2676556],[-10.7425945,6.2675784],[-10.7418524,6.2673776],[-10.7415167,6.2672562],[-10.7411445,6.2671225],[-10.7409446,6.2670946],[-10.7406848,6.2670526],[-10.7402899,6.2669193],[-10.7399019,6.2668149],[-10.739458,6.266621],[-10.7389984,6.2664785],[-10.7387638,6.2663988],[-10.7384583,6.2663063],[-10.7382262,6.266218],[-10.7379982,6.2661397],[-10.7377472,6.2660975],[-10.7374346,6.2660369],[-10.7372656,6.265958],[-10.7369281,6.2658171],[-10.7366178,6.2657205],[-10.7362929,6.2656316],[-10.7358974,6.2655086],[-10.7351804,6.2652179],[-10.7344742,6.2650371],[-10.734095,6.264996],[-10.7338503,6.2649292],[-10.7335278,6.2647904],[-10.733233,6.2646688],[-10.7325446,6.264406],[-10.7322675,6.2642975],[-10.7318205,6.2641259],[-10.73153,6.2640463],[-10.7311108,6.2639309],[-10.7306075,6.2637433],[-10.7304188,6.2636721],[-10.7297946,6.2634735],[-10.7290278,6.2632289],[-10.7285035,6.263002],[-10.727947,6.262768],[-10.7276879,6.2628032],[-10.7273544,6.2627413],[-10.7270564,6.2626502],[-10.7266487,6.2624311],[-10.7262912,6.2623146],[-10.7260852,6.2622397],[-10.7257251,6.2621258],[-10.7252533,6.2619587],[-10.7248149,6.2617865],[-10.7243232,6.2615838],[-10.7238453,6.2615022],[-10.7232281,6.2612683],[-10.722522,6.2609704],[-10.7219068,6.2607486],[-10.7213343,6.2605449],[-10.7207208,6.2602897],[-10.7201644,6.2600273],[-10.7196894,6.2598705],[-10.7192798,6.2597472],[-10.7185664,6.2594565],[-10.7179741,6.2591649],[-10.7176003,6.2591406],[-10.7168052,6.258768],[-10.7163123,6.258641],[-10.7155989,6.2583219],[-10.7147607,6.2579284],[-10.7142522,6.2576295],[-10.7135872,6.2573717],[-10.7127419,6.2569533],[-10.7124725,6.2568231],[-10.7121784,6.2565562],[-10.7117682,6.2560953],[-10.711226,6.2557301],[-10.7107338,6.2554749],[-10.7105149,6.2552316],[-10.7104307,6.255138],[-10.7101204,6.2547551],[-10.7099967,6.2546216],[-10.709728,6.2543367],[-10.7092358,6.2540318],[-10.7087614,6.2536879],[-10.7084545,6.2531539],[-10.7084152,6.2530723],[-10.708287,6.2527342],[-10.7081753,6.2525743],[-10.7079245,6.2521653],[-10.7078398,6.2520273],[-10.7077745,6.2516155],[-10.7077616,6.2515345],[-10.7078299,6.2513377],[-10.7077449,6.2510819],[-10.7075941,6.2509415],[-10.7073428,6.2507074],[-10.7072883,6.2506565],[-10.7071693,6.2504848],[-10.7069495,6.2501672],[-10.7069258,6.2500457],[-10.7068666,6.2497424],[-10.7068104,6.2494545],[-10.7067686,6.2493184],[-10.706657,6.2489546],[-10.7065912,6.2487853],[-10.7064751,6.2484866],[-10.7063954,6.2480935],[-10.7063788,6.2480115],[-10.706352,6.2477032],[-10.7063431,6.2476002],[-10.7064116,6.2474911],[-10.7065144,6.2473272],[-10.7065824,6.2472159],[-10.7067177,6.2469939],[-10.706735,6.2468892],[-10.7067676,6.2466925],[-10.7067612,6.2465797],[-10.7067498,6.246377],[-10.7066536,6.24619],[-10.7065821,6.2460508],[-10.7064642,6.245886],[-10.7062754,6.2456217],[-10.706156,6.2455244],[-10.7059365,6.2453452],[-10.7056833,6.2450656],[-10.7055513,6.2449197],[-10.7054015,6.2447044],[-10.7052553,6.2444942],[-10.7051267,6.2441944],[-10.7050698,6.2440617],[-10.7048618,6.243855],[-10.7047666,6.2437603],[-10.7045241,6.2432639],[-10.7043922,6.2430172],[-10.7042682,6.242785],[-10.7040603,6.2426061],[-10.7039535,6.2425142],[-10.7036402,6.2423089],[-10.7035202,6.2422192],[-10.7026865,6.2415961],[-10.7021851,6.2413087],[-10.702111,6.2412662],[-10.7014682,6.2407449],[-10.7013048,6.240668],[-10.7011595,6.2405996],[-10.7006609,6.2399352],[-10.7003046,6.2397276],[-10.6999577,6.2395346],[-10.6998903,6.2394635],[-10.6996295,6.2391497],[-10.6993199,6.2387892],[-10.6991202,6.2385243],[-10.6991031,6.2383893],[-10.6990958,6.2381767],[-10.6992044,6.2378074],[-10.6991905,6.2376778],[-10.6991775,6.2375269],[-10.6988876,6.2372885],[-10.6985695,6.2369787],[-10.6983091,6.236672],[-10.6980749,6.2364153],[-10.6978003,6.2362964],[-10.6975478,6.2360804],[-10.6973238,6.2358581],[-10.6970307,6.2356474],[-10.6967486,6.235421],[-10.6961961,6.2350641],[-10.6958353,6.2348304],[-10.6946644,6.2339655],[-10.6944491,6.2337337],[-10.6942579,6.233521],[-10.6938676,6.2333028],[-10.6936421,6.2332663],[-10.6934448,6.2332543],[-10.6931831,6.2333317],[-10.6929488,6.2333755],[-10.6920463,6.2334806],[-10.6911437,6.233521],[-10.6903356,6.2334508],[-10.6898102,6.2333917],[-10.6890541,6.2332623],[-10.6885743,6.2331977],[-10.688054,6.2330522],[-10.6876068,6.2328582],[-10.6871921,6.23264],[-10.6868668,6.2324298],[-10.6864847,6.2322358],[-10.6857384,6.2320631],[-10.6850691,6.2319284],[-10.6840861,6.2317993],[-10.6832161,6.2315811],[-10.6827189,6.2314401],[-10.6815004,6.2311204],[-10.6804597,6.2308213],[-10.6799118,6.2306437],[-10.678655,6.2302457],[-10.6776057,6.2299484],[-10.6772968,6.2298851],[-10.6768983,6.2297948],[-10.6764857,6.2296984],[-10.6760934,6.2295442],[-10.6759649,6.2293687],[-10.6757844,6.2291481],[-10.67562,6.2289677],[-10.6754266,6.2287521],[-10.6751796,6.2286691],[-10.6746623,6.2285419],[-10.6742883,6.2285096],[-10.6737516,6.2284288],[-10.6736283,6.2284139],[-10.6730524,6.2283722],[-10.6722539,6.2282644],[-10.6719791,6.2282429],[-10.6718618,6.2282147],[-10.6713286,6.2281459],[-10.6711483,6.2281204],[-10.6705237,6.2279923],[-10.67009,6.2279057],[-10.6696389,6.2278567],[-10.6692146,6.227766],[-10.6686535,6.2275073],[-10.6681653,6.2274171],[-10.6677673,6.2273456],[-10.6669054,6.2272082],[-10.6665854,6.2271074],[-10.6661004,6.2269819],[-10.6658566,6.2269087],[-10.6651318,6.226815],[-10.6648808,6.2267637],[-10.6644141,6.2266887],[-10.6640677,6.2266182],[-10.663846,6.226543],[-10.6634705,6.2264107],[-10.6630676,6.2262625],[-10.6627055,6.2261424],[-10.662287,6.2259877],[-10.6620179,6.2259237],[-10.66123,6.225729],[-10.6610861,6.2256874],[-10.6606667,6.225634],[-10.6602705,6.2255512],[-10.659677,6.2253411],[-10.6591416,6.2252317],[-10.6585305,6.2251309],[-10.658087,6.2249994],[-10.6578313,6.2249531],[-10.6574329,6.2247995],[-10.656823,6.2247106],[-10.6566054,6.2246887],[-10.6563596,6.2246298],[-10.656092,6.2245727],[-10.6553595,6.2243388],[-10.6548153,6.2242021],[-10.6545202,6.224113],[-10.6543175,6.2240541],[-10.6541398,6.2240074],[-10.6539089,6.223898],[-10.6536465,6.2237604],[-10.6533885,6.2236254],[-10.6531885,6.2235305],[-10.6528413,6.2233884],[-10.6525706,6.2232476],[-10.6522385,6.2231854],[-10.6520502,6.2231506],[-10.6517444,6.2230274],[-10.651392,6.222846],[-10.6511802,6.2227303],[-10.6509365,6.2226577],[-10.6505873,6.2225654],[-10.6502274,6.2224934],[-10.6500065,6.2224208],[-10.6493425,6.2223144],[-10.6487678,6.2222261],[-10.6483669,6.2221159],[-10.6481074,6.2220414],[-10.6476343,6.2218974],[-10.6471066,6.2217603],[-10.6469203,6.2217331],[-10.6465211,6.2217037],[-10.6459926,6.2215259],[-10.6454323,6.2213894],[-10.6450576,6.2213238],[-10.6444887,6.2211897],[-10.6440478,6.2210011],[-10.6435055,6.2209434],[-10.6432932,6.2208792],[-10.6429797,6.2207854],[-10.6425715,6.2206841],[-10.6423906,6.2206125],[-10.6420121,6.2204877],[-10.6416995,6.2203943],[-10.6412929,6.2202568],[-10.6409677,6.220176],[-10.6404229,6.2200952],[-10.6397375,6.2200631],[-10.6391626,6.2200024],[-10.638748,6.2199739],[-10.638545,6.2199347],[-10.6379593,6.2198284],[-10.6375526,6.2197847],[-10.6371787,6.2197476],[-10.6363977,6.2196081],[-10.635772,6.2195132],[-10.6355818,6.219497],[-10.6349427,6.2193677],[-10.6346157,6.2193264],[-10.6341215,6.2192141],[-10.6334628,6.2190848],[-10.6321294,6.2187776],[-10.6304788,6.2184705],[-10.6289305,6.2181549],[-10.6287152,6.2181141],[-10.6286822,6.2257428],[-10.6247964,6.2257547],[-10.6249245,6.2267259],[-10.6249289,6.2284856],[-10.6249289,6.2285711],[-10.6249458,6.2336446],[-10.6248991,6.233759],[-10.6245708,6.2345698],[-10.6246699,6.2346492],[-10.6244945,6.2347582],[-10.6232827,6.2377483],[-10.6225904,6.2397042],[-10.6248144,6.2401325],[-10.6267457,6.2404578],[-10.6268707,6.2404771],[-10.627261,6.2405479],[-10.6281477,6.2406914],[-10.6317736,6.2379866],[-10.631849,6.237932],[-10.6319163,6.2379177],[-10.6337279,6.2381387],[-10.6351924,6.2383173],[-10.6351493,6.2384587],[-10.6349187,6.2392168],[-10.6348361,6.2399099],[-10.63592,6.2398449],[-10.6373523,6.2397591],[-10.6374271,6.2399448],[-10.6392214,6.2443933],[-10.6409257,6.2481122],[-10.6413205,6.2485278],[-10.6518664,6.3412639],[-10.6495669,6.3429263],[-10.6457841,6.3450588],[-10.6445887,6.3457329],[-10.6423333,6.3457033],[-10.6418685,6.3458862],[-10.6292504,6.3508469],[-10.6286616,6.3509754],[-10.6144856,6.354061],[-10.6131487,6.3552608],[-10.6085159,6.3565714],[-10.5949425,6.3583513],[-10.5923932,6.3595964],[-10.5920323,6.3600903],[-10.5842229,6.3707791],[-10.5832479,6.3723499],[-10.5790543,6.3790466],[-10.5785787,6.3795482],[-10.577564,6.3806184],[-10.577285,6.3809125],[-10.5717095,6.3821978],[-10.5699493,6.3825061],[-10.5612797,6.3840246],[-10.5596696,6.3843064],[-10.5577859,6.3844376],[-10.5520628,6.3848369],[-10.5516696,6.3878584],[-10.5423275,6.3862384],[-10.5415052,6.3862409],[-10.540264,6.3862446],[-10.5362336,6.3862567],[-10.5348976,6.3851467],[-10.5326803,6.3831005],[-10.5304573,6.3810481],[-10.5262268,6.3782263],[-10.518926,6.3752873],[-10.5166616,6.3743756],[-10.5072541,6.3729455],[-10.5050428,6.3726095],[-10.5048664,6.3725828],[-10.5031858,6.3722198],[-10.4874195,6.3688121],[-10.4819869,6.3641201],[-10.467005,6.3756581],[-10.4656511,6.3782332],[-10.4645189,6.3776824],[-10.4584589,6.3746265],[-10.4580214,6.3742395],[-10.4559572,6.372414],[-10.4559405,6.3723994],[-10.4551904,6.3719527],[-10.4544854,6.3718908],[-10.4518083,6.3716548],[-10.4517246,6.3716273],[-10.4473206,6.3701724],[-10.44701,6.3700365],[-10.4470143,6.3698534],[-10.4463499,6.36955],[-10.4460911,6.369635],[-10.4371418,6.3725776],[-10.4227813,6.378451],[-10.421475,6.3790283],[-10.4119013,6.3915629],[-10.4118848,6.391525],[-10.411439,6.3921322],[-10.4082933,6.3845544],[-10.4087556,6.3844028],[-10.4131026,6.3680002],[-10.4089729,6.3677729],[-10.4052961,6.367571],[-10.4052426,6.3677203],[-10.4050869,6.3677179],[-10.4035666,6.3713728],[-10.3984446,6.3808565],[-10.3984448,6.3809198],[-10.3979007,6.3811253],[-10.3983,6.3820099],[-10.3984486,6.382339],[-10.3987675,6.3830458],[-10.3998224,6.3873341],[-10.400713,6.3909536],[-10.4013179,6.3936656],[-10.4018384,6.3959986],[-10.4036795,6.3992192],[-10.4041556,6.3998781],[-10.4048336,6.4008162],[-10.4034031,6.4026899],[-10.3987786,6.4096705],[-10.3970829,6.41223],[-10.3955804,6.4144978],[-10.3909355,6.4288902],[-10.3920917,6.4378984],[-10.3933109,6.4473247],[-10.3940124,6.4494107],[-10.3958195,6.4548923],[-10.3957963,6.4555978],[-10.3956946,6.458678],[-10.3960439,6.4594412],[-10.3961131,6.4615996],[-10.3961353,6.4622902],[-10.3961384,6.4623835],[-10.3948003,6.4629823],[-10.3902747,6.4647802],[-10.3892753,6.4651769],[-10.3891822,6.4652139],[-10.3890056,6.4664726],[-10.3887678,6.4681712],[-10.3889285,6.4692757],[-10.3891321,6.4706724],[-10.3902713,6.4723169],[-10.3907728,6.4730407],[-10.3918929,6.4743139],[-10.3912583,6.4757751],[-10.3906513,6.4771734],[-10.3906747,6.4776572],[-10.39069,6.4777775],[-10.3907402,6.4781713],[-10.3908211,6.4788036],[-10.3913929,6.4793972],[-10.3915511,6.4795098],[-10.3920335,6.4798521],[-10.3919715,6.4799981],[-10.3916742,6.480697],[-10.3907066,6.4826033],[-10.3896917,6.4834539],[-10.3893382,6.4837499],[-10.3880756,6.4839925],[-10.3877748,6.4840504],[-10.3859976,6.4835477],[-10.3854581,6.4828551],[-10.3849757,6.4837783],[-10.3849054,6.4839124],[-10.383926,6.48706],[-10.3839685,6.4875796],[-10.3841241,6.4895141],[-10.3841242,6.4895717],[-10.3811609,6.4963359],[-10.3823352,6.5029673],[-10.3822629,6.5029765],[-10.3806817,6.5031838],[-10.3797312,6.5035193],[-10.3783532,6.5037531],[-10.3777723,6.5038513],[-10.3776258,6.5037217],[-10.3775415,6.5038904],[-10.3770795,6.5048135],[-10.3766013,6.5069603],[-10.3762457,6.5085592],[-10.3770747,6.515842],[-10.3767327,6.5162],[-10.3728262,6.5202906],[-10.3720635,6.5209757],[-10.369066,6.5237822],[-10.3679411,6.5248355],[-10.3685717,6.5257551],[-10.3703403,6.5283345],[-10.3710845,6.5294194],[-10.3710894,6.5312037],[-10.3709093,6.5323472],[-10.3708102,6.5326775],[-10.3702669,6.5344883],[-10.370886,6.5348789],[-10.3707383,6.5359345],[-10.3701964,6.5361875],[-10.3704607,6.5383957],[-10.3704828,6.5384352],[-10.3704901,6.541107],[-10.370493,6.5421549],[-10.3709775,6.54441],[-10.3719727,6.5490393],[-10.3720624,6.5491809],[-10.3747811,6.5534731],[-10.3752877,6.5542727],[-10.3753261,6.5547909],[-10.375495,6.555259],[-10.3752938,6.558136],[-10.3751382,6.5603594],[-10.3741626,6.560851],[-10.375305,6.5625294],[-10.3761107,6.5636678],[-10.3768204,6.5660679],[-10.3764547,6.570718],[-10.3764395,6.5709136],[-10.3774518,6.5740134],[-10.3782016,6.5763095],[-10.3785662,6.5774259],[-10.3787317,6.5779325],[-10.3792592,6.5784736],[-10.3810597,6.5792176],[-10.3822464,6.5801447],[-10.3825039,6.5814977],[-10.3835313,6.5828553],[-10.3854304,6.5848029],[-10.3864787,6.5868851],[-10.3891747,6.5922398],[-10.3900628,6.5928947],[-10.3912491,6.5936522],[-10.3915068,6.5951741],[-10.3928014,6.5964609],[-10.3952008,6.5956539],[-10.396523,6.5952093],[-10.3969524,6.5993828],[-10.3996219,6.6035766],[-10.3999131,6.6040341],[-10.4011257,6.605967],[-10.4029401,6.6087881],[-10.4033683,6.6094607],[-10.4034526,6.6095932],[-10.4074364,6.6158446],[-10.4077977,6.6168672],[-10.4087091,6.6194482],[-10.4089094,6.6200151],[-10.4109438,6.6220378],[-10.4110031,6.6220965],[-10.4121682,6.6233327],[-10.4127255,6.6239234],[-10.4141438,6.6254274],[-10.4191082,6.6264396],[-10.4202016,6.6266913],[-10.4221664,6.6273838],[-10.4258438,6.6287343],[-10.4268349,6.6288914],[-10.4310214,6.6295537],[-10.4323184,6.629759],[-10.4325107,6.6304814],[-10.4332533,6.6332697],[-10.433569,6.6339594],[-10.4336623,6.6342593],[-10.4339004,6.6347029],[-10.435053,6.636849],[-10.436143,6.6388783],[-10.4367321,6.6399748],[-10.4366139,6.6429589],[-10.4365791,6.6438345],[-10.4362373,6.6438208],[-10.4359258,6.6445672],[-10.4351375,6.6472768],[-10.4350351,6.6474518],[-10.4344602,6.6484352],[-10.4365563,6.6513518],[-10.4332269,6.655119],[-10.4311524,6.6597173],[-10.4309006,6.6610813],[-10.4300421,6.6657349],[-10.4299194,6.6664005],[-10.430703,6.6675388],[-10.4326448,6.6703587],[-10.4325601,6.6707676],[-10.4322538,6.6722425],[-10.4318211,6.6743271],[-10.4266023,6.6745514],[-10.4245201,6.6764362],[-10.4239251,6.6766476],[-10.422849,6.6770305],[-10.4209744,6.6776983],[-10.4204524,6.677909],[-10.4168036,6.6793805],[-10.4163,6.6799167],[-10.4132651,6.6831482],[-10.4095012,6.6811004],[-10.408466,6.6842054],[-10.4038728,6.6842185],[-10.4035506,6.6843607],[-10.4003075,6.6857903],[-10.3996596,6.6860759],[-10.3986478,6.6865219],[-10.3972001,6.6871602],[-10.3976318,6.692169],[-10.3957514,6.6965904],[-10.3947107,6.6966149],[-10.3950311,6.6976715],[-10.3944013,6.6993644],[-10.3927129,6.7005611],[-10.3930357,6.7025402],[-10.3918833,6.7063491],[-10.391676,6.70783],[-10.3889858,6.7101104],[-10.3866901,6.7110352],[-10.3873638,6.7122159],[-10.3851674,6.71454],[-10.3847221,6.7158125],[-10.3830471,6.7162519],[-10.3832957,6.7173155],[-10.3827462,6.7186085],[-10.3822363,6.7188315],[-10.3796021,6.7199858],[-10.3791283,6.7201934],[-10.3783007,6.7207322],[-10.3755852,6.722528],[-10.3772626,6.7261058],[-10.3773706,6.7263384],[-10.3774727,6.7266416],[-10.3774127,6.7281164],[-10.3774047,6.7283126],[-10.3772805,6.7313662],[-10.3772697,6.7316579],[-10.3772088,6.7332989],[-10.3771495,6.7349211],[-10.3770997,6.7362259],[-10.3770863,6.7365855],[-10.3780566,6.7380319],[-10.3791669,6.7396866],[-10.3796027,6.7403359],[-10.3794026,6.7405677],[-10.3768971,6.7434749],[-10.375666,6.7512021],[-10.3759729,6.7515726],[-10.3774219,6.7533212],[-10.3782369,6.7543046],[-10.3785994,6.7547422],[-10.3779795,6.7570405],[-10.3742336,6.7616435],[-10.3717448,6.7654001],[-10.3718315,6.7654666],[-10.3723064,6.7657671],[-10.3740397,6.7668627],[-10.3744668,6.7672402],[-10.3778078,6.7701919],[-10.3777295,6.7717674],[-10.3778219,6.7719749],[-10.3781591,6.7721401],[-10.3945053,6.7720258],[-10.4035463,6.7719783],[-10.4125559,6.7719307],[-10.4348204,6.7718123],[-10.4347547,6.7754914],[-10.4404027,6.775976],[-10.4481222,6.7756355],[-10.4520355,6.7757295],[-10.4526142,6.7761895],[-10.4546424,6.7756441],[-10.4570798,6.7792744],[-10.4584347,6.7813063],[-10.4604126,6.783105],[-10.4652906,6.7874243],[-10.468895,6.7902682],[-10.4741922,6.793212],[-10.4791195,6.7963157],[-10.4857984,6.8014753],[-10.490468,6.8066696],[-10.4921672,6.8089614],[-10.4934032,6.8104191],[-10.4955641,6.8129682],[-10.4997542,6.8169195],[-10.5029238,6.8193641],[-10.5043127,6.8203942],[-10.5068599,6.8231347],[-10.509898,6.8308588],[-10.5200803,6.8262555],[-10.5232857,6.8244128],[-10.5262248,6.8225529],[-10.5317222,6.8217956],[-10.5371052,6.8183954],[-10.5436522,6.8150976],[-10.549987,6.8117229],[-10.5542154,6.8110464],[-10.5563232,6.808714],[-10.5564747,6.8080991],[-10.556845,6.806598],[-10.5577998,6.802499],[-10.5609951,6.7980748],[-10.5630998,6.7947912],[-10.5637273,6.7926748],[-10.5652555,6.7885293],[-10.5653289,6.7877877],[-10.5661358,6.7852673],[-10.5663407,6.783258],[-10.5660705,6.7823953],[-10.5658454,6.7816765],[-10.5657263,6.7789245],[-10.5666457,6.7771249],[-10.5671832,6.7768914],[-10.5664878,6.7764557],[-10.5717724,6.7722286],[-10.5724286,6.7714805],[-10.5725364,6.7712484],[-10.5741746,6.7677457],[-10.5743579,6.764825],[-10.5743445,6.7642559],[-10.5736857,6.7608076],[-10.573576,6.7602005],[-10.5733661,6.7590923],[-10.5741241,6.7471505],[-10.5740866,6.7467484],[-10.574035,6.7445297],[-10.5739885,6.7425325],[-10.5729862,6.7399275],[-10.5725403,6.7390919],[-10.5743155,6.7355138],[-10.5744466,6.7352494],[-10.5740409,6.7293237],[-10.5739411,6.7278337],[-10.5747873,6.7263961],[-10.57511,6.725142],[-10.5760318,6.7242811],[-10.5766306,6.723263],[-10.5778546,6.7225781],[-10.5781988,6.7223854],[-10.5786048,6.7223236],[-10.5796671,6.7215639],[-10.5876074,6.7206933],[-10.5919554,6.7187588],[-10.5933449,6.7181405],[-10.5937143,6.7177685],[-10.5939402,6.7172603],[-10.594082,6.7169703],[-10.594883,6.7151396],[-10.5972528,6.7135889],[-10.5973261,6.713353],[-10.5978181,6.7117695],[-10.5970957,6.7104793],[-10.5968805,6.7100946],[-10.5957518,6.7072233],[-10.5953827,6.7062846],[-10.5938441,6.7029297],[-10.5936445,6.7027314],[-10.5924907,6.7004558],[-10.5901283,6.6958256],[-10.5878722,6.6930292],[-10.587777,6.692439],[-10.5876857,6.6905092],[-10.5876321,6.6893768],[-10.5880741,6.6891097],[-10.589972,6.6883977],[-10.5963132,6.6875842],[-10.5966134,6.6869791],[-10.5971011,6.6859958],[-10.5973564,6.68322],[-10.5984069,6.6811023],[-10.6010505,6.681226],[-10.6019719,6.6800339],[-10.6024377,6.6780249],[-10.6024931,6.6777857],[-10.6032819,6.6764618],[-10.6039345,6.6739492],[-10.6046445,6.6687557],[-10.6073361,6.6634018],[-10.6081897,6.6617126],[-10.6096246,6.6558935],[-10.6108012,6.6519256],[-10.6108913,6.6509612],[-10.6111842,6.6478568],[-10.6105462,6.646849],[-10.6097233,6.6455863],[-10.608586,6.6412953],[-10.6084259,6.6327358],[-10.606832,6.6302018],[-10.6024588,6.6263835],[-10.5986174,6.623053],[-10.5981772,6.6228159],[-10.5932626,6.6203167],[-10.591023,6.6187165],[-10.5908556,6.6183093],[-10.592245,6.6166372],[-10.5949769,6.6121393],[-10.5968767,6.608229],[-10.6036475,6.605729],[-10.6131037,6.602498],[-10.6190426,6.6004684],[-10.6250702,6.5982458],[-10.6297361,6.5965249],[-10.6332669,6.595559],[-10.6427491,6.5930423],[-10.644013,6.5927838],[-10.6448916,6.5925413],[-10.6485046,6.591573],[-10.651227,6.5908396],[-10.6519773,6.5908427],[-10.6572435,6.5899482],[-10.6602552,6.590878],[-10.6654087,6.5924698],[-10.6664301,6.5924364],[-10.6689742,6.5923533],[-10.6711859,6.5922809],[-10.6793445,6.5924723],[-10.6799336,6.592455],[-10.6877205,6.592878],[-10.6925093,6.5924809],[-10.6965704,6.5921438],[-10.6971302,6.5918961],[-10.7004545,6.5905448],[-10.708191,6.5869948],[-10.7098914,6.5861373],[-10.7104035,6.5852771],[-10.7131453,6.5806715],[-10.7141247,6.5790264],[-10.7151595,6.5750923],[-10.7163664,6.5705027],[-10.7169763,6.5692296],[-10.7176032,6.5667488],[-10.7166731,6.5659405],[-10.7139483,6.563601],[-10.7151113,6.5626013],[-10.7235777,6.5552979],[-10.7274244,6.5517418],[-10.7295279,6.5496414],[-10.7352107,6.5441673],[-10.7398965,6.5396537],[-10.740689,6.5389343],[-10.7511253,6.5298527],[-10.751104,6.5294815],[-10.755535,6.5254594],[-10.757043,6.5253462],[-10.758215,6.5246572],[-10.7721168,6.5231889],[-10.7723887,6.5232382],[-10.7736812,6.5234643],[-10.7800684,6.5245804],[-10.7825014,6.5260626],[-10.7848311,6.5278418],[-10.7862735,6.5283606],[-10.7871796,6.5290965],[-10.7929761,6.5407512],[-10.7874077,6.5467708],[-10.7871323,6.5463152],[-10.7861693,6.5459085],[-10.785946,6.5467088],[-10.7844539,6.5471735],[-10.7813809,6.5476116],[-10.7806506,6.5477159],[-10.7773778,6.5486786],[-10.7763302,6.5513248],[-10.7770781,6.5536476],[-10.7789396,6.5569707],[-10.7805902,6.5590326],[-10.7822308,6.5610815],[-10.7822353,6.5623496],[-10.7816395,6.5672903],[-10.7813152,6.5711263],[-10.7819516,6.5753522],[-10.7819571,6.5769063],[-10.7823884,6.5801875],[-10.7826839,6.5805713],[-10.7830104,6.5819637],[-10.7832067,6.5827999],[-10.7839487,6.5834313],[-10.7845063,6.5837023],[-10.785746,6.5843042],[-10.7862275,6.5845376],[-10.78728,6.5846988],[-10.791069,6.5850011],[-10.7955843,6.5859722],[-10.8018429,6.5873183],[-10.8047789,6.5880169],[-10.8070225,6.5886203],[-10.8081137,6.5889136],[-10.8120507,6.5912998],[-10.8132343,6.5920172],[-10.8140046,6.5918742],[-10.816643,6.5913843],[-10.8225651,6.5900974],[-10.8282029,6.5891794],[-10.8285514,6.5891228],[-10.8290454,6.5878382],[-10.8292542,6.5872955],[-10.8303569,6.5844292],[-10.8305195,6.5840065],[-10.8291086,6.5761794],[-10.8291027,6.574548],[-10.8304739,6.5738027],[-10.8330075,6.572948],[-10.8335312,6.5716774],[-10.8336432,6.571338],[-10.8337678,6.5709595],[-10.8339495,6.5704078],[-10.8354283,6.5701911],[-10.8364247,6.5702428],[-10.8373313,6.5702897],[-10.8400784,6.5700683],[-10.8422446,6.5699015],[-10.8425589,6.5691607],[-10.8422198,6.5686793],[-10.84199,6.5680428],[-10.8407036,6.564507],[-10.8377645,6.5512092],[-10.8370857,6.549686],[-10.8367502,6.5489476],[-10.8360749,6.5433753],[-10.8357424,6.5375815],[-10.8357271,6.5373131],[-10.835723,6.5354149],[-10.8357114,6.5302358],[-10.8360118,6.5273804],[-10.8357058,6.5272171],[-10.8346352,6.5266457],[-10.8329495,6.5265631],[-10.8326404,6.5264897],[-10.8274637,6.5252771],[-10.8205038,6.5231792],[-10.8200308,6.5229221],[-10.8191445,6.5230818],[-10.8167591,6.5224824],[-10.8133737,6.5213779],[-10.810623,6.520708],[-10.8099292,6.5202426],[-10.8087236,6.5194343],[-10.8084396,6.5160119],[-10.8078239,6.5136943],[-10.8077294,6.5133386],[-10.8072612,6.5115766],[-10.8067318,6.5074894],[-10.8070502,6.5064682],[-10.8073927,6.5056746],[-10.8080158,6.5050133],[-10.8086448,6.5044231],[-10.8093454,6.5033508],[-10.8101745,6.5021306],[-10.8106086,6.5014916],[-10.810394,6.5002446],[-10.8099595,6.4977201],[-10.8092083,6.494552],[-10.8085666,6.4924402],[-10.8086431,6.4912289],[-10.8085126,6.4909191],[-10.8088363,6.4909858],[-10.8097245,6.491168],[-10.8102205,6.4914527],[-10.8117366,6.4923232],[-10.8123842,6.4922559],[-10.8127135,6.4920716],[-10.8133948,6.4907174],[-10.8145822,6.4900933],[-10.8157461,6.4905118],[-10.8190257,6.4915573],[-10.8198801,6.4916566],[-10.8229905,6.4920183],[-10.8242017,6.4917444],[-10.8245156,6.4916738],[-10.8248719,6.4915386],[-10.8271928,6.4898648],[-10.828365,6.4878771],[-10.829882,6.4868573],[-10.8302015,6.4865402],[-10.8324751,6.4846909],[-10.832589,6.4841689],[-10.832661,6.4838398],[-10.8327766,6.4826781],[-10.8328804,6.4816345],[-10.8329875,6.4805565],[-10.8342515,6.4791883],[-10.8368875,6.4774874],[-10.838724,6.4746915],[-10.8391662,6.4741903],[-10.8399427,6.4749397],[-10.8398443,6.4769484],[-10.840586,6.4774741],[-10.8420635,6.4769403],[-10.8428048,6.4773603],[-10.8427034,6.4785237],[-10.8424968,6.4798982],[-10.8444002,6.4798958],[-10.8445062,6.4803136],[-10.8446658,6.4815534],[-10.8447236,6.4820041],[-10.8456786,6.4830579],[-10.8471587,6.4832639],[-10.8483204,6.4830483],[-10.8500067,6.4817735],[-10.851904,6.4804985],[-10.8531199,6.4806523],[-10.8533368,6.4821315],[-10.8539773,6.4839256],[-10.8547175,6.4840291],[-10.8553479,6.4834784],[-10.8556026,6.4830648],[-10.8556777,6.482665],[-10.8555915,6.4823039],[-10.8554846,6.4814764],[-10.85583,6.4808816],[-10.8563751,6.4794989],[-10.856579,6.4791631],[-10.8562809,6.4781041],[-10.8571468,6.477286],[-10.857966,6.4765122],[-10.859767,6.4766362],[-10.8600153,6.4766533],[-10.8599518,6.4777352],[-10.8592481,6.479207],[-10.8590645,6.4803684],[-10.8604633,6.4811182],[-10.8608909,6.481328],[-10.8625306,6.4822035],[-10.8641432,6.4825638],[-10.8648573,6.4827233],[-10.8651058,6.4826941],[-10.8665944,6.481585],[-10.8675426,6.4808786],[-10.8678301,6.4806368],[-10.8694331,6.4793815],[-10.869491,6.4783726],[-10.870101,6.4774159],[-10.8704366,6.4768897],[-10.8717066,6.4774134],[-10.8726522,6.4790532],[-10.8724562,6.480053],[-10.8711906,6.4805826],[-10.8709492,6.4808355],[-10.8705951,6.4819574],[-10.8708313,6.4820447],[-10.8716201,6.4825927],[-10.8732077,6.4832209],[-10.8734431,6.4830132],[-10.8738698,6.4823601],[-10.8743515,6.4816231],[-10.8754203,6.4815214],[-10.8756342,6.4821552],[-10.876272,6.4832096],[-10.8765744,6.4830191],[-10.8769854,6.4825582],[-10.8773237,6.4818319],[-10.8776352,6.4803508],[-10.8780461,6.480173],[-10.8791124,6.4797113],[-10.879332,6.4798139],[-10.8804281,6.4800529],[-10.880671,6.4804419],[-10.8808438,6.4807187],[-10.880463,6.4811795],[-10.8797116,6.4829143],[-10.8793398,6.4840441],[-10.8798727,6.4853102],[-10.8801712,6.4868981],[-10.87967,6.4876363],[-10.8788277,6.4884848],[-10.8786191,6.4892258],[-10.8797677,6.4895273],[-10.880206,6.4896426],[-10.8816897,6.4907995],[-10.882936,6.4917278],[-10.883385,6.4920618],[-10.8817007,6.4937594],[-10.8804301,6.4971354],[-10.8803275,6.4974076],[-10.8784558,6.5009333],[-10.878365,6.5013524],[-10.8766819,6.5091269],[-10.8748414,6.514753],[-10.8747247,6.5151094],[-10.8755505,6.515737],[-10.8763349,6.5158787],[-10.8804702,6.5166267],[-10.8848513,6.517419],[-10.886291,6.5176792],[-10.8925749,6.5201325],[-10.8958456,6.5224506],[-10.8960518,6.5225967],[-10.8988789,6.5278713],[-10.899843,6.5298075],[-10.9015294,6.5331945],[-10.9021814,6.5345499],[-10.9029245,6.5359078],[-10.9031839,6.5363815],[-10.9042038,6.5382452],[-10.9046432,6.5388742],[-10.9071861,6.5420781],[-10.9081376,6.5431334],[-10.908332,6.5438899],[-10.9094836,6.5483671],[-10.9105677,6.5509918],[-10.9115004,6.5532496],[-10.9123625,6.5549195],[-10.9141185,6.5578433],[-10.9145871,6.5579585],[-10.9157866,6.5582528],[-10.9258007,6.5605126],[-10.9277865,6.5609497],[-10.928461,6.5609753],[-10.9287536,6.5610341],[-10.9295579,6.5608835],[-10.9302408,6.560756],[-10.9354726,6.5613744],[-10.9369811,6.5615431],[-10.937392,6.561589],[-10.93855,6.5617982],[-10.9396953,6.5620056],[-10.9399548,6.5619877],[-10.9424014,6.5619844],[-10.9443562,6.5602522],[-10.9441101,6.5598158],[-10.9437722,6.5592159],[-10.9475683,6.5586932],[-10.9510013,6.5534457],[-10.9590916,6.5257226]]]]}]}
