# Supplementary material
Source: ML conference proceedings conference paper supplement (https://proceedings.neurips.cc/paper_files/paper/2022/hash/9d3faa41886997cfc2128b930077fa49-Abstract.html)
Supplement: Supplementary file 1 [file 9d3faa41886997cfc2128b930077fa49-Supplemental-Conference.zip › code/ebola/map/geojson/moyamba.geojson]

{"type":"GeometryCollection","geometries":[{"type":"MultiPolygon","coordinates":[[[[-13.0094916,7.9098632],[-13.0094406,7.9099828],[-13.0094352,7.9100864],[-13.0095318,7.9102245],[-13.0096686,7.910275],[-13.0097759,7.9102564],[-13.0099368,7.9102006],[-13.0100226,7.910089],[-13.0100495,7.9100253],[-13.0100709,7.9099668],[-13.0099878,7.9098048],[-13.0098429,7.9097118],[-13.0097035,7.9097357],[-13.0096069,7.9097702],[-13.0094916,7.9098632]]],[[[-13.0006698,7.9075067],[-13.0003855,7.9075466],[-13.0001146,7.9076342],[-12.9999,7.9077565],[-12.9996693,7.9081364],[-12.9996076,7.9082639],[-12.9995969,7.9083675],[-12.9996103,7.9084259],[-12.9997069,7.9084897],[-13.0000556,7.9086119],[-13.0003721,7.9087076],[-13.0006188,7.9087076],[-13.0009407,7.9085269],[-13.0011231,7.9083834],[-13.0013108,7.9082825],[-13.0014932,7.9081762],[-13.0020565,7.9080699],[-13.002137,7.9079105],[-13.0021262,7.9077246],[-13.002035,7.9076714],[-13.001263,7.907695],[-13.0011177,7.9076103],[-13.0009916,7.9075386],[-13.0008924,7.9075014],[-13.0007851,7.9074988],[-13.0006698,7.9075067]]],[[[-12.9968768,7.9118226],[-12.9968289,7.9119461],[-12.9968101,7.9121347],[-12.996847,7.912311],[-12.9969388,7.9123525],[-12.9971588,7.91231],[-12.9973224,7.9122303],[-12.9974391,7.9121838],[-12.9975329,7.9121055],[-12.9975477,7.9119753],[-12.9975075,7.9118903],[-12.9972982,7.9117362],[-12.9971105,7.9117096],[-12.9968768,7.9118226]]],[[[-12.9903835,7.9080195],[-12.9902628,7.9080832],[-12.9900724,7.908317],[-12.9899383,7.9084605],[-12.9896835,7.9085296],[-12.9894474,7.9085455],[-12.9892677,7.9086039],[-12.9892087,7.9087049],[-12.9892328,7.9089918],[-12.9891577,7.9091592],[-12.9890263,7.9092495],[-12.9887286,7.9093319],[-12.9885542,7.9093372],[-12.987991,7.9092601],[-12.987822,7.9092522],[-12.9877147,7.9093186],[-12.9876182,7.9094621],[-12.9876047,7.9096666],[-12.9878408,7.9098074],[-12.9878542,7.9098818],[-12.9878327,7.910089],[-12.987712,7.9102856],[-12.9876021,7.9104796],[-12.9874975,7.9106124],[-12.9873714,7.9107479],[-12.9870522,7.9108488],[-12.9868108,7.9108382],[-12.9867196,7.9108302],[-12.9865909,7.9108302],[-12.9864004,7.9108063],[-12.9862154,7.9107665],[-12.9860625,7.9107373],[-12.9855502,7.9105832],[-12.9849681,7.9104743],[-12.9847723,7.9105035],[-12.9846248,7.910554],[-12.984452,7.910576],[-12.9842064,7.9106257],[-12.9839757,7.9106762],[-12.983806,7.910702],[-12.9833695,7.9107452],[-12.9831603,7.9107798],[-12.9829484,7.9107957],[-12.9828411,7.9108754],[-12.9828411,7.9110242],[-12.9829699,7.9111783],[-12.9833239,7.911343],[-12.9841179,7.9115555],[-12.9847938,7.9116884],[-12.985695,7.9117415],[-12.9860812,7.9117681],[-12.9868645,7.9117043],[-12.9871702,7.9116884],[-12.9874599,7.9117096],[-12.9882056,7.9117946],[-12.9886401,7.9118424],[-12.9888761,7.9118637],[-12.9890639,7.9118531],[-12.9893321,7.9119434],[-12.9895413,7.9120072],[-12.989611,7.9120975],[-12.9899383,7.9121772],[-12.9902548,7.9122091],[-12.9906035,7.9121984],[-12.9909307,7.9121134],[-12.9912686,7.9119859],[-12.9917193,7.9119221],[-12.9920304,7.9117681],[-12.9924703,7.9114918],[-12.9928458,7.9114014],[-12.993173,7.9112739],[-12.9933661,7.9110879],[-12.9936397,7.9108701],[-12.9940581,7.9103892],[-12.9943049,7.9100837],[-12.9944202,7.909911],[-12.994498,7.9097171],[-12.994666,7.909209],[-12.9948708,7.9088935],[-12.9948869,7.9087687],[-12.9948065,7.9086252],[-12.9947314,7.9085269],[-12.9946321,7.9084791],[-12.993762,7.909075],[-12.993632,7.909204],[-12.993502,7.909332],[-12.993373,7.90946],[-12.9932427,7.9095736],[-12.9929423,7.909648],[-12.9924059,7.9094886],[-12.9919285,7.9090742],[-12.991825,7.908938],[-12.9917166,7.9087076],[-12.9915798,7.9085482],[-12.9913947,7.9083834],[-12.9909816,7.9082134],[-12.990795,7.90816],[-12.9906008,7.9080088],[-12.9905176,7.9079876],[-12.9903835,7.9080195]]],[[[-12.9893161,8.2172829],[-12.9894556,8.2172961],[-12.9895575,8.2172537],[-12.989693,8.2171165],[-12.9899545,8.2166723],[-12.9906357,8.2154087],[-12.9913975,8.2140601],[-12.9920466,8.2127858],[-12.9923684,8.2119841],[-12.9926742,8.2111081],[-12.9927493,8.2103223],[-12.9926903,8.2091967],[-12.9921539,8.2078003],[-12.9915047,8.2068977],[-12.9903031,8.2056446],[-12.9875458,8.2031757],[-12.9839088,8.199459],[-12.9774017,8.1935653],[-12.9740114,8.1906025],[-12.9718925,8.1889379],[-12.9681159,8.1847937],[-12.9632236,8.1795688],[-12.9619682,8.1780077],[-12.9588407,8.1744129],[-12.955783,8.1708287],[-12.9549221,8.1697242],[-12.9536507,8.1680329],[-12.9534925,8.1678153],[-12.9534255,8.1675206],[-12.9534791,8.1673693],[-12.9534469,8.167202],[-12.9533799,8.16704],[-12.9528219,8.1657177],[-12.9527092,8.1651522],[-12.9526368,8.1648389],[-12.9525859,8.1646691],[-12.9524518,8.164539],[-12.952189,8.1645125],[-12.9519743,8.1645469],[-12.9517383,8.1647647],[-12.9513842,8.1652001],[-12.950896,8.1650089],[-12.9504348,8.164685],[-12.9501021,8.1643504],[-12.9497802,8.16383],[-12.9493403,8.1634424],[-12.9487665,8.1630708],[-12.9484713,8.1627946],[-12.9477365,8.1622106],[-12.9470819,8.1618016],[-12.9463954,8.1613928],[-12.9455692,8.1607342],[-12.9443944,8.1595076],[-12.9437131,8.1588545],[-12.9430104,8.1580792],[-12.9426725,8.1576862],[-12.9420019,8.1569057],[-12.9415084,8.1562525],[-12.9410202,8.1555887],[-12.9404569,8.1547391],[-12.9398024,8.1537302],[-12.9392874,8.1529125],[-12.9383004,8.1512981],[-12.9378082,8.1504255],[-12.9370237,8.1490678],[-12.9347385,8.1447135],[-12.9322386,8.139658],[-12.9317988,8.1387924],[-12.9316218,8.1382295],[-12.9315841,8.1376984],[-12.9317773,8.1373321],[-12.9323031,8.1368329],[-12.9323834,8.1365885],[-12.9322762,8.1363709],[-12.9319276,8.1363762],[-12.9314018,8.1361638],[-12.9309298,8.1359301],[-12.9303129,8.1354522],[-12.9297066,8.134868],[-12.9280652,8.1314162],[-12.9265416,8.127805],[-12.925812,8.1259783],[-12.9251616,8.1236771],[-12.9245139,8.1223033],[-12.9236878,8.1208535],[-12.9212844,8.1167271],[-12.9203779,8.1139975],[-12.9202546,8.1127494],[-12.9203081,8.1118519],[-12.920807,8.1109331],[-12.9211343,8.1105455],[-12.9216949,8.1102481],[-12.9220329,8.1101498],[-12.9223011,8.1100861],[-12.9223413,8.110041],[-12.9223091,8.1099825],[-12.9222233,8.1099772],[-12.9211558,8.1099825],[-12.9204692,8.1098763],[-12.9189671,8.1092497],[-12.9175723,8.1080919],[-12.9159951,8.1067747],[-12.9146969,8.105394],[-12.913474,8.103737],[-12.9120684,8.1014109],[-12.9115749,8.1001256],[-12.9110814,8.0987236],[-12.9111887,8.0981075],[-12.9115963,8.0972365],[-12.9120256,8.0964292],[-12.9123582,8.0960575],[-12.9129375,8.0956538],[-12.9132594,8.0952714],[-12.9133345,8.0948784],[-12.9128409,8.0939755],[-12.9124333,8.0935932],[-12.9118109,8.0931152],[-12.9109526,8.0927539],[-12.9101265,8.0925204],[-12.9091717,8.0924672],[-12.9082167,8.0923823],[-12.9071476,8.0921661],[-12.9033895,8.0899884],[-12.9033636,8.0899733],[-12.8989631,8.0874483],[-12.8985501,8.0869066],[-12.8980781,8.0863277],[-12.8975041,8.0858815],[-12.8972198,8.085446],[-12.897166,8.0846866],[-12.8974773,8.084012],[-12.8971983,8.0831463],[-12.89671,8.0825993],[-12.8959322,8.0814786],[-12.8955245,8.0805067],[-12.8952778,8.0790621],[-12.8953529,8.077883],[-12.8956747,8.0761621],[-12.8963614,8.0743351],[-12.8970909,8.0726142],[-12.8976381,8.0715945],[-12.898003,8.0707022],[-12.8985931,8.0701073],[-12.8995371,8.0693637],[-12.9000521,8.0687051],[-12.9001058,8.0680465],[-12.899902,8.0671542],[-12.8999985,8.0664744],[-12.9001595,8.0660495],[-12.9001057,8.0657414],[-12.8998483,8.0654546],[-12.899741,8.0650509],[-12.8998376,8.0646154],[-12.899977,8.0639887],[-12.8998912,8.0623103],[-12.8994513,8.0581886],[-12.8994513,8.0551823],[-12.9000521,8.0514749],[-12.9005618,8.049483],[-12.9010981,8.0478789],[-12.9016882,8.0468219],[-12.9027719,8.0456799],[-12.903952,8.0444476],[-12.9046441,8.0434225],[-12.9051269,8.042238],[-12.9052288,8.0414094],[-12.9051375,8.0405701],[-12.9047352,8.0390244],[-12.9045905,8.0381374],[-12.9045744,8.0375425],[-12.9047621,8.0372344],[-12.904966,8.0369157],[-12.904966,8.0368201],[-12.9047943,8.0366501],[-12.9040755,8.0356355],[-12.9035498,8.0345732],[-12.9031528,8.0342332],[-12.9028953,8.0339889],[-12.9027237,8.0336277],[-12.9024661,8.0332984],[-12.9018653,8.0322413],[-12.9014577,8.0309771],[-12.9009533,8.0286505],[-12.9008944,8.0274713],[-12.9011036,8.026887],[-12.901522,8.0262602],[-12.9018278,8.0255219],[-12.9019029,8.0249322],[-12.9017366,8.0232059],[-12.9015113,8.0221276],[-12.9011518,8.021692],[-12.9004813,8.0213042],[-12.9003203,8.020773],[-12.9002775,8.0200824],[-12.9000307,8.0188606],[-12.8995157,8.015461],[-12.8992582,8.0108713],[-12.8989685,8.0092034],[-12.8983785,8.0079922],[-12.8981746,8.0074928],[-12.8981531,8.0068874],[-12.8985286,8.0037319],[-12.8987111,8.0020957],[-12.8984536,8.0011183],[-12.8980673,8.000332],[-12.8965439,7.9986534],[-12.8959699,7.9980318],[-12.8957177,7.9976547],[-12.8955353,7.9972085],[-12.8955675,7.9968685],[-12.895589,7.9944674],[-12.8956962,7.9919174],[-12.8949453,7.9875613],[-12.8939797,7.9846926],[-12.8934218,7.9840233],[-12.892542,7.9831095],[-12.8923113,7.9824561],[-12.8926922,7.9806339],[-12.8927566,7.9785089],[-12.8929497,7.9765752],[-12.8932072,7.9734089],[-12.8926922,7.9708376],[-12.8917052,7.9672888],[-12.8905464,7.9644837],[-12.888744,7.9602548],[-12.8888793,7.95874],[-12.89222,7.9478229],[-12.8936793,7.9466116],[-12.8953155,7.9456498],[-12.9005134,7.9438063],[-12.9021872,7.9439976],[-12.9035898,7.9443231],[-12.903917,7.9443159],[-12.9046816,7.9441836],[-12.9050517,7.9441092],[-12.9055935,7.9438435],[-12.906484,7.9432856],[-12.907573,7.9424197],[-12.9082918,7.9416758],[-12.9090858,7.9407195],[-12.909531,7.9402838],[-12.90981,7.9401085],[-12.9101318,7.9399066],[-12.9103518,7.9396834],[-12.9106307,7.93954],[-12.910856,7.9394975],[-12.9111028,7.9394603],[-12.9113281,7.9394072],[-12.911548,7.9392319],[-12.9120094,7.9386687],[-12.9123312,7.938249],[-12.9128677,7.9376273],[-12.9132539,7.9373458],[-12.9135275,7.9372236],[-12.9137313,7.9369845],[-12.9140693,7.9365966],[-12.9144394,7.9361609],[-12.9150724,7.9355073],[-12.9153675,7.9348433],[-12.9158152,7.934364],[-12.9162312,7.9339188],[-12.9171002,7.9330316],[-12.9174596,7.9328509],[-12.9178405,7.9327287],[-12.9182589,7.932649],[-12.9188061,7.9325534],[-12.9190689,7.9326012],[-12.9193854,7.9326331],[-12.9196429,7.9326331],[-12.9199165,7.9325693],[-12.9200345,7.9324524],[-12.9200774,7.9323409],[-12.9200667,7.9321655],[-12.9200882,7.9319743],[-12.9201096,7.931767],[-12.9201955,7.9310179],[-12.9202357,7.9308452],[-12.9203108,7.930739],[-12.9204369,7.9306194],[-12.9205951,7.9305238],[-12.9207078,7.9304839],[-12.920925,7.9304441],[-12.9211128,7.9304175],[-12.9215151,7.9302316],[-12.9218826,7.929942],[-12.9221374,7.9297268],[-12.922352,7.9295249],[-12.9228616,7.9291105],[-12.9236609,7.9284437],[-12.9243609,7.9278805],[-12.9249805,7.9274103],[-12.925323,7.927162],[-12.9255411,7.9270251],[-12.925971,7.926778],[-12.9262841,7.9265655],[-12.9266542,7.9263795],[-12.9270405,7.9262095],[-12.9272711,7.9260607],[-12.9276949,7.9256835],[-12.9279363,7.9254603],[-12.9281187,7.9252638],[-12.9283786,7.9250223],[-12.9286712,7.9247643],[-12.9289717,7.924403],[-12.9294705,7.9238345],[-12.9302108,7.9230428],[-12.9307044,7.9226125],[-12.9314447,7.9219589],[-12.9319489,7.9215233],[-12.9322118,7.921332],[-12.9334134,7.9207688],[-12.9339391,7.9205775],[-12.9343522,7.9204766],[-12.9353768,7.920179],[-12.935645,7.9200727],[-12.93594,7.9200674],[-12.9362297,7.9202534],[-12.9365301,7.92045],[-12.9369834,7.9206227],[-12.9372785,7.9206625],[-12.9376942,7.9207369],[-12.9379758,7.9207661],[-12.938177,7.9207794],[-12.9383594,7.9208804],[-12.9385096,7.9210823],[-12.938574,7.9211673],[-12.9386598,7.9212098],[-12.9387671,7.9212045],[-12.938919,7.921175],[-12.9401296,7.9205137],[-12.9406875,7.9202906],[-12.941578,7.919908],[-12.9421091,7.9195574],[-12.9427368,7.9189835],[-12.9430157,7.9187551],[-12.9435307,7.9183459],[-12.9439156,7.9181134],[-12.9443318,7.9180128],[-12.9447165,7.9181277],[-12.945134,7.918501],[-12.9452634,7.9185425],[-12.9453921,7.9185266],[-12.9459112,7.9181635],[-12.9472068,7.9171158],[-12.9476331,7.9168602],[-12.9492974,7.9160187],[-12.9498339,7.9156362],[-12.9499465,7.9155618],[-12.9500644,7.9154861],[-12.9505312,7.9154077],[-12.9508826,7.9153797],[-12.9510409,7.9154236],[-12.9513681,7.9155511],[-12.9517543,7.9157743],[-12.9519904,7.9158381],[-12.9522049,7.9159443],[-12.9524088,7.91621],[-12.9527843,7.9163481],[-12.9532242,7.9164969],[-12.9535139,7.9167307],[-12.9536158,7.9168104],[-12.9537338,7.9168635],[-12.9538947,7.9168157],[-12.954447,7.916614],[-12.9546514,7.9166575],[-12.9548818,7.9169273],[-12.9550105,7.9170867],[-12.9551876,7.9172461],[-12.955347,7.91752],[-12.955474,7.917779],[-12.9559766,7.9178965],[-12.9561585,7.9178093],[-12.9566977,7.9175091],[-12.956974,7.9173895],[-12.9572345,7.9173161],[-12.9575426,7.917347],[-12.9577277,7.91744],[-12.9578243,7.9175675],[-12.9579878,7.9180936],[-12.9580307,7.9182875],[-12.9580924,7.9184017],[-12.958248,7.9184841],[-12.9583955,7.9184788],[-12.958602,7.9184203],[-12.9589292,7.918322],[-12.9592618,7.9182609],[-12.9593182,7.9183087],[-12.9593852,7.9183884],[-12.9593959,7.9184363],[-12.9593879,7.9185266],[-12.9594898,7.9185638],[-12.9596454,7.9185213],[-12.959742,7.9184017],[-12.9598305,7.9182955],[-12.9603776,7.917541],[-12.9605037,7.9174321],[-12.9607049,7.9173231],[-12.9608926,7.9171637],[-12.9610536,7.9170096],[-12.9611528,7.9168742],[-12.9612708,7.9167705],[-12.9614103,7.9166271],[-12.9614237,7.9165766],[-12.9613915,7.9164969],[-12.961311,7.9164385],[-12.9611635,7.9163774],[-12.9609731,7.9163481],[-12.9608631,7.9163694],[-12.9607719,7.9164172],[-12.9606754,7.9163933],[-12.9605547,7.9162419],[-12.9604635,7.9159656],[-12.9603481,7.9149879],[-12.9603133,7.9145735],[-12.9602999,7.9142016],[-12.9603267,7.9138775],[-12.9603454,7.9136649],[-12.9603267,7.9133567],[-12.960088,7.9129317],[-12.9597795,7.9124588],[-12.959463,7.91231],[-12.9590902,7.9122011],[-12.9589641,7.9121267],[-12.9586771,7.9116113],[-12.958146,7.9105779],[-12.9579932,7.9102458],[-12.9578465,7.9099254],[-12.9578267,7.9098864],[-12.9576954,7.9095763],[-12.9574954,7.9091332],[-12.9573172,7.9087979],[-12.9570544,7.9085189],[-12.9567647,7.9083967],[-12.9565467,7.908371],[-12.9563811,7.9084445],[-12.9560807,7.9086172],[-12.9559734,7.9086385],[-12.9559118,7.9086836],[-12.9558769,7.9087873],[-12.9558527,7.9088749],[-12.9557374,7.9089015],[-12.9553941,7.9088058],[-12.9553351,7.9088005],[-12.9551446,7.908944],[-12.9549919,7.9089466],[-12.9548282,7.9089014],[-12.9544053,7.9086322],[-12.9543549,7.9086086],[-12.9542515,7.9085694],[-12.9538599,7.9083887],[-12.9535595,7.9080939],[-12.9534119,7.907961],[-12.9532161,7.9078733],[-12.9530793,7.9078308],[-12.952913,7.9078122],[-12.9528299,7.9077963],[-12.9527494,7.9077405],[-12.9525295,7.9074722],[-12.952168,7.90707],[-12.9520494,7.9069196],[-12.9518992,7.906715],[-12.951808,7.9066194],[-12.9516766,7.9065875],[-12.9514244,7.9066114],[-12.9512769,7.9066805],[-12.9510865,7.9066592],[-12.9508907,7.9065397],[-12.9505122,7.9060365],[-12.9495925,7.9048234],[-12.9490882,7.9041911],[-12.9488039,7.903705],[-12.9486617,7.9034738],[-12.9486349,7.9034446],[-12.9485759,7.9034233],[-12.9484096,7.9034579],[-12.948357,7.903464],[-12.9482836,7.9034047],[-12.9480583,7.9031125],[-12.9477122,7.9026449],[-12.947672,7.9025998],[-12.9475915,7.9025652],[-12.9475272,7.9026024],[-12.9474145,7.9026635],[-12.9472725,7.9026795],[-12.9471034,7.9026423],[-12.9469693,7.9025705],[-12.9467145,7.9022756],[-12.9459822,7.9011571],[-12.9453385,7.9002778],[-12.9448557,7.8996694],[-12.9444936,7.8991672],[-12.9442897,7.8989148],[-12.9439518,7.8984446],[-12.9433697,7.8976662],[-12.9429406,7.8970657],[-12.9426509,7.8966938],[-12.9422647,7.896189],[-12.9415458,7.8952007],[-12.9412508,7.8950732],[-12.941004,7.8950147],[-12.9404515,7.8945152],[-12.9402088,7.8941827],[-12.9395986,7.8933462],[-12.939384,7.8930752],[-12.9390729,7.8926395],[-12.938118,7.891412],[-12.9375279,7.890498],[-12.9371095,7.8899242],[-12.9368627,7.8895416],[-12.9366267,7.8891643],[-12.9362243,7.8884948],[-12.9353982,7.8872514],[-12.9349878,7.8865394],[-12.9348081,7.8862657],[-12.9345292,7.8858353],[-12.9342797,7.8854819],[-12.9339498,7.8848656],[-12.9337057,7.8844431],[-12.9335234,7.8841137],[-12.933292,7.8836609],[-12.932885,7.8829181],[-12.9326329,7.8824266],[-12.9323754,7.8819377],[-12.9321528,7.881502],[-12.9319382,7.8810344],[-12.9316592,7.8803622],[-12.9313964,7.8798335],[-12.9311952,7.8792463],[-12.9308492,7.8782818],[-12.9307232,7.8779233],[-12.9306535,7.8777452],[-12.9305972,7.8776257],[-12.9305435,7.8775433],[-12.9305033,7.8775088],[-12.9304604,7.8774769],[-12.9304201,7.8774556],[-12.9303692,7.8774211],[-12.9303343,7.8773786],[-12.9302351,7.877275],[-12.9301492,7.877182],[-12.9301277,7.8769481],[-12.9301223,7.8767568],[-12.9301089,7.8766837],[-12.9300901,7.8766067],[-12.9300781,7.8765469],[-12.9300633,7.8764379],[-12.9300526,7.8762918],[-12.9301223,7.8762015],[-12.9301761,7.8761298],[-12.9302458,7.8760687],[-12.930337,7.875989],[-12.9303611,7.8759704],[-12.9303544,7.8759346],[-12.930333,7.8759292],[-12.9303021,7.8759346],[-12.9302445,7.8759545],[-12.9302029,7.875989],[-12.9301569,7.8760302],[-12.9301258,7.8760584],[-12.9300637,7.8761195],[-12.9300473,7.8761378],[-12.9300232,7.8761418],[-12.929987,7.876098],[-12.9299615,7.8760475],[-12.9298649,7.8758801],[-12.9297119,7.8755559],[-12.929527,7.8750432],[-12.9294196,7.8742274],[-12.9284352,7.8733772],[-12.9277916,7.872729],[-12.9271209,7.872155],[-12.9269171,7.8720009],[-12.9265577,7.8717724],[-12.9255384,7.8711772],[-12.9245219,7.8708557],[-12.9238595,7.870452],[-12.9233739,7.8701676],[-12.9229851,7.8699233],[-12.9226464,7.8697718],[-12.9223655,7.8696815],[-12.9221455,7.8696788],[-12.9220114,7.8697001],[-12.9218931,7.86976],[-12.9216465,7.8699949],[-12.921424,7.8701358],[-12.9211021,7.8702793],[-12.92074,7.870436],[-12.9203832,7.870513],[-12.9202008,7.8705369],[-12.9200479,7.8705741],[-12.919753,7.8707017],[-12.9195089,7.8708904],[-12.9193614,7.8710259],[-12.9193748,7.8711694],[-12.9193372,7.8712782],[-12.9192192,7.8713846],[-12.9189993,7.8714537],[-12.9188089,7.8715121],[-12.9184976,7.8715412],[-12.9181383,7.8715387],[-12.9171833,7.8715864],[-12.916537,7.8716317],[-12.915861,7.8716475],[-12.915136,7.8715909],[-12.914308,7.8714589],[-12.9136027,7.871281],[-12.9130367,7.8711375],[-12.9120308,7.8708664],[-12.9115883,7.8707229],[-12.9109687,7.870513],[-12.9103866,7.870234],[-12.9099762,7.8700507],[-12.9091528,7.8696203],[-12.9086083,7.8693466],[-12.9082623,7.8691845],[-12.907353,7.8687408],[-12.9068461,7.8684778],[-12.9064384,7.8682732],[-12.9055935,7.8678507],[-12.9050544,7.8675664],[-12.9047513,7.8673884],[-12.9044589,7.8672184],[-12.9036516,7.8667003],[-12.90315,7.8663921],[-12.9028738,7.8661875],[-12.9022354,7.865688],[-12.9013717,7.8650317],[-12.9006797,7.8644365],[-12.9004276,7.8642266],[-12.9001942,7.8640114],[-12.8996551,7.8635996],[-12.899285,7.8632861],[-12.8984535,7.8626192],[-12.8982658,7.8624572],[-12.8979332,7.862319],[-12.8976542,7.8621436],[-12.8972572,7.8617025],[-12.8967503,7.8610728],[-12.8966108,7.8608894],[-12.8963533,7.8605865],[-12.896069,7.8602757],[-12.8958008,7.8599196],[-12.8951115,7.8591253],[-12.8947333,7.8587266],[-12.8943042,7.8581449],[-12.8940412,7.857802],[-12.8933815,7.8569014],[-12.8930596,7.8564549],[-12.8927296,7.8559421],[-12.89248,7.8555039],[-12.8923247,7.8551583],[-12.8921692,7.8548156],[-12.8919652,7.8541619],[-12.8919277,7.8538829],[-12.8919653,7.8536173],[-12.8920243,7.8534578],[-12.8919626,7.8534047],[-12.8918527,7.8533834],[-12.8917856,7.85341],[-12.8917427,7.8535349],[-12.8917373,7.8536677],[-12.8917668,7.8537847],[-12.8917937,7.8539042],[-12.8918017,7.8540504],[-12.8917695,7.8541912],[-12.8917105,7.8542895],[-12.8916434,7.854332],[-12.8916381,7.8543347],[-12.8915764,7.8543373],[-12.8915067,7.8542815],[-12.8914235,7.8541646],[-12.8913645,7.8540636],[-12.8913109,7.8539308],[-12.8912894,7.8538458],[-12.8912894,7.8537607],[-12.8912867,7.8536943],[-12.8912036,7.8536066],[-12.8910667,7.8535428],[-12.8909755,7.8533435],[-12.8907421,7.8528758],[-12.8901547,7.8520309],[-12.8899938,7.8517121],[-12.8898704,7.8514942],[-12.8897095,7.8511966],[-12.889452,7.8510797],[-12.888921,7.8511223],[-12.8882074,7.851186],[-12.8878857,7.8509947],[-12.887725,7.8507149],[-12.8873169,7.8500806],[-12.8871292,7.8497405],[-12.8868932,7.8494084],[-12.8866545,7.849087],[-12.8861877,7.848481],[-12.8857693,7.8479603],[-12.8851068,7.8470117],[-12.8847341,7.8463209],[-12.8846884,7.8461614],[-12.8846026,7.8460074],[-12.884519,7.8459319],[-12.8840716,7.8458559],[-12.8839482,7.8458108],[-12.8837899,7.8456912],[-12.8834143,7.8453749],[-12.883104,7.8450239],[-12.8827947,7.8445326],[-12.8824782,7.8440038],[-12.882335,7.8437319],[-12.882079,7.8432149],[-12.8820035,7.8430154],[-12.8818614,7.842864],[-12.8817515,7.8428242],[-12.8815824,7.8428294],[-12.8812338,7.8429597],[-12.8809146,7.8431058],[-12.8808636,7.8431243],[-12.8808127,7.8431165],[-12.8806357,7.8430049],[-12.8804532,7.8428374],[-12.8800508,7.8423936],[-12.8796029,7.8417798],[-12.8792274,7.8412404],[-12.8788573,7.840616],[-12.8785729,7.8401457],[-12.878222,7.8395889],[-12.8779024,7.8390642],[-12.877712,7.838756],[-12.8775752,7.8385142],[-12.8774571,7.8382884],[-12.8771943,7.837818],[-12.8769127,7.8372627],[-12.8768,7.8370581],[-12.8767195,7.8369066],[-12.8764353,7.8363434],[-12.8762422,7.8359847],[-12.8759792,7.8354744],[-12.8756467,7.8348287],[-12.875298,7.8341458],[-12.8749546,7.8335533],[-12.8745925,7.8329102],[-12.8743216,7.8324107],[-12.8739515,7.8317836],[-12.8736189,7.8311724],[-12.8734875,7.83092],[-12.8733265,7.8306091],[-12.8731737,7.8303115],[-12.8729511,7.8299077],[-12.8728814,7.829804],[-12.8728063,7.8297058],[-12.8727151,7.8296074],[-12.8726534,7.8295383],[-12.872613,7.8294427],[-12.8726936,7.8284489],[-12.8727044,7.8283453],[-12.8726936,7.8281752],[-12.8726319,7.8279891],[-12.872436,7.8274444],[-12.8722724,7.8269475],[-12.872089,7.8264189],[-12.8718299,7.8260121],[-12.8718031,7.8259511],[-12.8718031,7.825882],[-12.8718647,7.8257996],[-12.8719238,7.8257518],[-12.8720767,7.8256296],[-12.8722243,7.8255419],[-12.8722779,7.8254914],[-12.8722833,7.8254516],[-12.8722578,7.8254356],[-12.8722269,7.8254383],[-12.8720968,7.8254715],[-12.8720191,7.8255406],[-12.8719641,7.825611],[-12.8718125,7.8257904],[-12.8717944,7.8258056],[-12.8717844,7.825805],[-12.8717596,7.8257904],[-12.8717495,7.8257678],[-12.8716892,7.8257092],[-12.8716451,7.8256671],[-12.8716182,7.8256413],[-12.8715,7.8255684],[-12.8713256,7.8254515],[-12.8710815,7.8252814],[-12.870639,7.8247925],[-12.8701536,7.824487],[-12.8697781,7.8243116],[-12.8693623,7.8240273],[-12.8686247,7.8233577],[-12.8675277,7.8227757],[-12.8667284,7.8225313],[-12.8661973,7.8223453],[-12.8656716,7.8221327],[-12.8654302,7.8219414],[-12.865221,7.8216278],[-12.8650172,7.8213833],[-12.8646256,7.8211335],[-12.8643037,7.8209157],[-12.8639121,7.8207456],[-12.8634132,7.820727],[-12.8627479,7.8208119],[-12.8623242,7.8208997],[-12.8621606,7.8209182],[-12.8621083,7.8209145],[-12.8620521,7.8209106],[-12.8618253,7.8207828],[-12.8611654,7.8203841],[-12.8602374,7.8198154],[-12.8597438,7.8194647],[-12.8591631,7.8189731],[-12.8586441,7.8185532],[-12.8582391,7.8182875],[-12.8574694,7.8178013],[-12.8570858,7.8175036],[-12.8566861,7.817206],[-12.8561443,7.8167782],[-12.8557178,7.8164327],[-12.8555086,7.8162627],[-12.8552753,7.8160713],[-12.8548783,7.8156621],[-12.8544411,7.8153565],[-12.8541863,7.8151705],[-12.8538403,7.8148596],[-12.8533682,7.8144052],[-12.8526977,7.8137914],[-12.8525555,7.8136559],[-12.8522337,7.8133556],[-12.8518769,7.8130101],[-12.8517696,7.8128985],[-12.8513807,7.8125026],[-12.8512359,7.8123485],[-12.850973,7.812088],[-12.8506753,7.8117798],[-12.8503507,7.8114343],[-12.8499162,7.8109507],[-12.8496319,7.8106132],[-12.8493127,7.8101269],[-12.8491438,7.8099144],[-12.8489989,7.8097762],[-12.8488837,7.8097524],[-12.8487603,7.8098002],[-12.8486717,7.8098479],[-12.8484921,7.8099118],[-12.8483258,7.8099649],[-12.8481299,7.8101004],[-12.8480066,7.810135],[-12.8478375,7.8100897],[-12.8475103,7.8097868],[-12.8473199,7.8095451],[-12.8471751,7.8094441],[-12.846888,7.8092953],[-12.8466467,7.8092129],[-12.8463999,7.8091863],[-12.8460512,7.8092314],[-12.8459574,7.8092979],[-12.8458822,7.8094227],[-12.8457804,7.8096142],[-12.8456382,7.8097603],[-12.8455389,7.8098002],[-12.8450856,7.8097364],[-12.8446806,7.8094998],[-12.8445278,7.8093378],[-12.8444258,7.8092767],[-12.8442864,7.8092581],[-12.8439564,7.809173],[-12.84364,7.8089233],[-12.8432591,7.8085459],[-12.8428486,7.8081127],[-12.8423175,7.8075121],[-12.8419286,7.8070285],[-12.8416389,7.8066618],[-12.8413814,7.8063296],[-12.8407109,7.8054155],[-12.8402925,7.8049531],[-12.8400484,7.80469],[-12.8397587,7.8044296],[-12.8394744,7.8041293],[-12.8391874,7.8038928],[-12.8386107,7.8035154],[-12.8383049,7.8034092],[-12.8379644,7.8032046],[-12.8378115,7.8031727],[-12.8375379,7.8031887],[-12.8374816,7.80321],[-12.8373609,7.8032286],[-12.8372724,7.8031887],[-12.8371919,7.8031488],[-12.8369343,7.8029787],[-12.8364972,7.8025855],[-12.8363095,7.802349],[-12.8362156,7.8022188],[-12.8360653,7.8021177],[-12.8358642,7.8020221],[-12.835604,7.8020061],[-12.8354242,7.8020326],[-12.8353251,7.8020301],[-12.8352205,7.8019743],[-12.8351213,7.8018627],[-12.8349763,7.8017191],[-12.8347966,7.8015729],[-12.8346626,7.80148],[-12.8345526,7.8014029],[-12.834456,7.801262],[-12.8342642,7.8011185],[-12.8341235,7.801084],[-12.8338848,7.8010894],[-12.8336702,7.8010973],[-12.833469,7.801084],[-12.8333403,7.8010654],[-12.8331337,7.801092],[-12.8330156,7.8010839],[-12.8327716,7.8009857],[-12.8326134,7.8008316],[-12.8324873,7.8006908],[-12.8323102,7.8005685],[-12.8321574,7.800534],[-12.8320045,7.8005047],[-12.8317846,7.8004596],[-12.8316317,7.8004224],[-12.83158,7.800413],[-12.8314708,7.8003931],[-12.8312762,7.8003359],[-12.8309383,7.8001446],[-12.8304286,7.7998217],[-12.8297782,7.7993978],[-12.8291318,7.7988836],[-12.8282359,7.7982272],[-12.828083,7.7981103],[-12.8277531,7.7978154],[-12.8273857,7.7975097],[-12.8269243,7.7971935],[-12.8264764,7.7968985],[-12.8261733,7.796686],[-12.8260097,7.7965371],[-12.8257763,7.7964016],[-12.8256154,7.7963378],[-12.8254303,7.7963086],[-12.8251863,7.7963405],[-12.8249288,7.7964149],[-12.8245828,7.7965318],[-12.8244674,7.7965398],[-12.8243709,7.7965132],[-12.8240812,7.7963724],[-12.8237915,7.7962581],[-12.8232417,7.795918],[-12.8227964,7.7955964],[-12.8226838,7.7955592],[-12.8225523,7.79553],[-12.821871,7.7953068],[-12.8216699,7.7952483],[-12.8213668,7.7952191],[-12.8210905,7.7951872],[-12.8208357,7.7951951],[-12.8206399,7.7951819],[-12.8202644,7.7951819],[-12.8200471,7.7952217],[-12.8196583,7.7953573],[-12.8192453,7.7952457],[-12.8189997,7.7951293],[-12.8186899,7.7948311],[-12.8182448,7.7945176],[-12.817623,7.7942822],[-12.8172469,7.7943368],[-12.81685,7.7941827],[-12.8164154,7.7939913],[-12.8161311,7.7939807],[-12.8158629,7.7938903],[-12.8155249,7.7936778],[-12.8153372,7.793513],[-12.8151816,7.7934226],[-12.8150153,7.7933907],[-12.8147955,7.7932791],[-12.8146023,7.7928008],[-12.8143502,7.7925616],[-12.8141731,7.7925191],[-12.81398,7.7925669],[-12.8137064,7.7926041],[-12.8134918,7.7925882],[-12.8133845,7.7925776],[-12.813009,7.7926679],[-12.8127301,7.7928008],[-12.8125155,7.7928327],[-12.8123438,7.7928167],[-12.8120598,7.792756],[-12.8117913,7.792466],[-12.8115714,7.7922853],[-12.8114856,7.79211],[-12.8115876,7.7916687],[-12.8117216,7.7912595],[-12.8116787,7.7908555],[-12.8115499,7.7905579],[-12.8114198,7.790442],[-12.8113031,7.7903028],[-12.8110564,7.7901912],[-12.810933,7.790255],[-12.8107774,7.7903347],[-12.810536,7.7903081],[-12.8103429,7.7902124],[-12.8101713,7.7901115],[-12.8099191,7.7900902],[-12.8098333,7.7900902],[-12.8096295,7.7901859],[-12.8093827,7.7903878],[-12.8092754,7.7904676],[-12.8091252,7.7905792],[-12.8087874,7.790829],[-12.8085887,7.790829],[-12.8084278,7.7907227],[-12.8081381,7.7903506],[-12.8079879,7.7900636],[-12.8078806,7.789867],[-12.8077304,7.7897288],[-12.8075963,7.7896384],[-12.8074622,7.7896491],[-12.8070385,7.7898511],[-12.8061748,7.7908715],[-12.805853,7.7913551],[-12.805751,7.7915465],[-12.8057027,7.7917059],[-12.8057725,7.7921524],[-12.8057671,7.79245],[-12.8057188,7.792753],[-12.8056008,7.7929974],[-12.8054453,7.7932048],[-12.8051234,7.7938479],[-12.8046513,7.7945016],[-12.8041954,7.7952722],[-12.8040542,7.7956766],[-12.8038037,7.7961173],[-12.803683,7.7962635],[-12.8035428,7.7963367],[-12.8031262,7.7963923],[-12.8006548,7.7960535],[-12.7982919,7.795725],[-12.7958323,7.7953785],[-12.7941156,7.7953041],[-12.7934504,7.7949321],[-12.7931286,7.7943795],[-12.7920664,7.7900213],[-12.7915513,7.7877038],[-12.7913691,7.785376],[-12.7910687,7.7819106],[-12.7911438,7.7768719],[-12.7910472,7.7706639],[-12.7904464,7.7664542],[-12.7902317,7.7651147],[-12.7894379,7.7631482],[-12.7887511,7.7615428],[-12.7879251,7.7598739],[-12.7862835,7.7583218],[-12.7849317,7.7576946],[-12.7823032,7.7568761],[-12.7796747,7.7565359],[-12.7785696,7.756217],[-12.7782583,7.7560787],[-12.7779688,7.7557918],[-12.7779794,7.7551432],[-12.7779365,7.7545266],[-12.7776361,7.7536549],[-12.7771103,7.7531553],[-12.7766062,7.7526132],[-12.7749969,7.7510079],[-12.7720679,7.7490412],[-12.7703941,7.7484564],[-12.7690101,7.7478081],[-12.7677763,7.7470213],[-12.7656198,7.7455648],[-12.7633345,7.7446931],[-12.7614141,7.7440765],[-12.7606523,7.7440978],[-12.760073,7.7442997],[-12.7595687,7.7448419],[-12.7593702,7.7451077],[-12.7591395,7.7454692],[-12.7589035,7.7458572],[-12.7583993,7.7465747],[-12.7573478,7.7468724],[-12.7552128,7.746309],[-12.7547085,7.745533],[-12.7544457,7.7450068],[-12.754333,7.7445017],[-12.7543116,7.7437045],[-12.7544618,7.7428753],[-12.7544296,7.7425776],[-12.7541936,7.7423543],[-12.7539039,7.74228],[-12.7531636,7.7422587],[-12.7525735,7.7417803],[-12.7517152,7.741153],[-12.7492851,7.7380275],[-12.7491114,7.7377853],[-12.7489954,7.7376234],[-12.748695,7.7371877],[-12.7470267,7.7356779],[-12.7453423,7.7339769],[-12.7434647,7.7311065],[-12.7410185,7.7268858],[-12.7397311,7.7253656],[-12.7380574,7.7238771],[-12.7344847,7.7213575],[-12.7315665,7.7194119],[-12.7288199,7.717562],[-12.7268887,7.7165626],[-12.726191,7.7164836],[-12.725349,7.7163882],[-12.72367,7.7163075],[-12.7218383,7.7154435],[-12.7182627,7.7119272],[-12.7154303,7.7085463],[-12.7148509,7.7071429],[-12.713542,7.7047826],[-12.7123618,7.7033686],[-12.711643,7.7024649],[-12.7108491,7.7018801],[-12.7099479,7.7015718],[-12.7092613,7.7015292],[-12.7084887,7.7016834],[-12.7071583,7.7020821],[-12.7056992,7.7023479],[-12.7044654,7.7024914],[-12.7034783,7.7025871],[-12.7021372,7.7030709],[-12.7013487,7.7034536],[-12.7005923,7.7037141],[-12.6995945,7.703863],[-12.6990957,7.7039693],[-12.6986666,7.7041341],[-12.69791,7.704614],[-12.6973951,7.7049102],[-12.6960164,7.705394],[-12.6938438,7.7061435],[-12.6930714,7.7063881],[-12.6915103,7.706909],[-12.6896918,7.7072067],[-12.6874977,7.7072546],[-12.6854272,7.7072705],[-12.6843166,7.7074991],[-12.6835925,7.7078659],[-12.6833296,7.7081476],[-12.6832491,7.7083922],[-12.6833242,7.7085889],[-12.683571,7.708759],[-12.6837963,7.7091789],[-12.6837802,7.7095776],[-12.6834422,7.7099763],[-12.6831365,7.7101464],[-12.6828307,7.7103538],[-12.6827502,7.7105185],[-12.6828039,7.7106568],[-12.6831955,7.7107524],[-12.6837695,7.7106674],[-12.6841879,7.710492],[-12.6845151,7.7104335],[-12.6847619,7.7105345],[-12.6848036,7.7106447],[-12.6847646,7.7108216],[-12.684558,7.7110342],[-12.6841718,7.7113478],[-12.6838553,7.7116668],[-12.6834691,7.7118528],[-12.6828039,7.7119538],[-12.6825196,7.7120495],[-12.6823318,7.7122409],[-12.6822031,7.7126183],[-12.6823962,7.7135327],[-12.6826054,7.7140058],[-12.6824927,7.7140961],[-12.6822674,7.7138197],[-12.6821709,7.7134582],[-12.6820475,7.7128894],[-12.6820421,7.7124695],[-12.6822513,7.7120336],[-12.6824927,7.7117837],[-12.6827235,7.711672],[-12.6829675,7.7116402],[-12.6833376,7.7117093],[-12.6835603,7.7116721],[-12.6837186,7.7115152],[-12.6838794,7.7112707],[-12.6840591,7.7110501],[-12.6845205,7.7108481],[-12.6845849,7.7107578],[-12.6845622,7.7106726],[-12.6844883,7.7106089],[-12.6841611,7.7106249],[-12.6837212,7.7109066],[-12.6833618,7.7109544],[-12.6827127,7.7108322],[-12.6824713,7.7106142],[-12.6824445,7.7104016],[-12.6825625,7.7101943],[-12.6832706,7.7098647],[-12.6835173,7.7095351],[-12.6835388,7.7091577],[-12.6832599,7.7088653],[-12.6826698,7.7085304],[-12.6822074,7.7084318],[-12.68179,7.708557],[-12.6813984,7.7088228],[-12.6810659,7.7090087],[-12.6806474,7.7090513],[-12.6796281,7.7088919],[-12.6782174,7.7084665],[-12.6766831,7.7078925],[-12.6738722,7.7069036],[-12.6715976,7.7062126],[-12.6674894,7.7046956],[-12.6649618,7.7034643],[-12.6632238,7.7025712],[-12.6605416,7.7010189],[-12.6595761,7.7007424],[-12.6584066,7.7010932],[-12.6571727,7.7020289],[-12.6568662,7.7022163],[-12.6566684,7.7023373],[-12.6560354,7.7024542],[-12.655617,7.7023904],[-12.6554239,7.7022522],[-12.6554453,7.7020183],[-12.6556063,7.7018907],[-12.6559282,7.7017737],[-12.6560784,7.7015823],[-12.6560891,7.7011678],[-12.6558745,7.7005298],[-12.6553917,7.6995198],[-12.6547695,7.6988392],[-12.6533854,7.6982652],[-12.6502848,7.6976379],[-12.6453817,7.6968192],[-12.643708,7.6965215],[-12.6430214,7.6963514],[-12.6425877,7.696265],[-12.642163,7.6961494],[-12.6410365,7.6958942],[-12.6397812,7.6955965],[-12.6385261,7.6952615],[-12.636863,7.6949479],[-12.6311016,7.6942356],[-12.6293421,7.6941505],[-12.6277436,7.6943205],[-12.6267244,7.6946182],[-12.6258768,7.695203],[-12.6250184,7.6962132],[-12.6227546,7.6993497],[-12.6212204,7.7008701],[-12.6197934,7.7019439],[-12.6186741,7.702635],[-12.6175388,7.703336],[-12.6159801,7.702037],[-12.6148003,7.7006522],[-12.6167216,7.6993073],[-12.6187421,7.6969148],[-12.6200837,7.6946964],[-12.6210166,7.6925237],[-12.6211239,7.6916731],[-12.6207377,7.6906205],[-12.6202227,7.6900889],[-12.6196326,7.6896742],[-12.6177443,7.6892596],[-12.6157272,7.689021],[-12.6138498,7.6888981],[-12.6109208,7.6885791],[-12.6080562,7.6880687],[-12.6043298,7.6872998],[-12.6002027,7.6868673],[-12.5967802,7.6867397],[-12.594849,7.6867929],[-12.5934435,7.6867822],[-12.5920917,7.6864207],[-12.5912012,7.6857509],[-12.5903214,7.6853681],[-12.5889374,7.6852299],[-12.5871242,7.6854638],[-12.5854827,7.686325],[-12.5825323,7.6886854],[-12.5784553,7.6920878],[-12.5733377,7.6970424],[-12.5697757,7.7002533],[-12.5666858,7.7023585],[-12.5628878,7.7046762],[-12.5581886,7.706994],[-12.5560213,7.7081849],[-12.5534615,7.7100013],[-12.5490837,7.7133628],[-12.5445496,7.7171933],[-12.5423099,7.7194333],[-12.5395204,7.7211342],[-12.5376965,7.7221762],[-12.534628,7.7240685],[-12.5311519,7.7262586],[-12.5267745,7.7280447],[-12.5243498,7.7291929],[-12.5230194,7.7300222],[-12.5214428,7.7315729],[-12.5199218,7.7327736],[-12.5180407,7.7348549],[-12.5163996,7.7368162],[-12.5144384,7.7391776],[-12.5123522,7.7408744],[-12.5099956,7.7421795],[-12.5082745,7.7433002],[-12.5063533,7.7443009],[-12.5050384,7.7446305],[-12.502829,7.745495],[-12.5006196,7.7465197],[-12.4988903,7.7472233],[-12.4980427,7.7475529],[-12.4974633,7.7478292],[-12.4969054,7.7482546],[-12.4961437,7.7491687],[-12.4949841,7.7508744],[-12.4935259,7.7531234],[-12.4917821,7.7556774],[-12.4905973,7.7578868],[-12.4899639,7.7595549],[-12.4889661,7.7620744],[-12.4880863,7.7643812],[-12.487389,7.7664754],[-12.4863707,7.7686456],[-12.4858583,7.76935],[-12.4849869,7.7705079],[-12.4785165,7.7752293],[-12.4787737,7.769909],[-12.4790527,7.7683145],[-12.4787308,7.7666987],[-12.4781514,7.7642536],[-12.4783875,7.7599802],[-12.479396,7.7553452],[-12.4810697,7.7520419],[-12.481649,7.7509653],[-12.4816919,7.7507528],[-12.4815525,7.7504658],[-12.4807371,7.7498598],[-12.4793632,7.7492086],[-12.4777867,7.7478612],[-12.476982,7.7468299],[-12.4760057,7.7452779],[-12.4755551,7.7446294],[-12.4743427,7.7431835],[-12.4737097,7.7418441],[-12.4734522,7.7410467],[-12.4730123,7.7389205],[-12.4727656,7.7371557],[-12.4723579,7.7344447],[-12.4720145,7.7322441],[-12.4716498,7.730256],[-12.4710275,7.728874],[-12.4704589,7.7278533],[-12.4694289,7.7263863],[-12.4678732,7.7250998],[-12.4671758,7.7247171],[-12.4660171,7.7243344],[-12.4650086,7.7240366],[-12.4640001,7.7237603],[-12.4628843,7.7237922],[-12.4620474,7.7237815],[-12.461114,7.7241218],[-12.4601163,7.7246108],[-12.4587512,7.7255091],[-12.4552561,7.7291503],[-12.4524,7.7326913],[-12.4499663,7.7366089],[-12.449254,7.7392206],[-12.4470073,7.7413083],[-12.4483868,7.7495096],[-12.4475054,7.7524712],[-12.4431371,7.7553188],[-12.4340555,7.7557365],[-12.4296105,7.7576349],[-12.4267966,7.7607329],[-12.4254721,7.762191],[-12.4182299,7.7650006],[-12.4132101,7.7650766],[-12.4042052,7.7651525],[-12.4007948,7.7640894],[-12.3988789,7.7620392],[-12.3974994,7.7584702],[-12.3969246,7.7566097],[-12.3963419,7.7560212],[-12.3947325,7.7557934],[-12.3923184,7.7580525],[-12.390824,7.759856],[-12.3898085,7.7609191],[-12.3900384,7.7618873],[-12.3905174,7.7629504],[-12.391667,7.7635958],[-12.392395,7.7644311],[-12.3919352,7.765798],[-12.3907856,7.7670319],[-12.3894828,7.7683418],[-12.3889847,7.7689872],[-12.3886206,7.7701072],[-12.3886206,7.7718537],[-12.3883332,7.7725941],[-12.3878507,7.7729507],[-12.3874694,7.7735325],[-12.3835712,7.7791931],[-12.3736872,7.7939707],[-12.3559959,7.8071032],[-12.3268052,7.8055827],[-12.3121546,7.8071955],[-12.2965273,7.7975188],[-12.2972436,7.7855195],[-12.2976911,7.7720385],[-12.298063,7.7683383],[-12.2964378,7.7645901],[-12.2945931,7.760899],[-12.2907495,7.7538452],[-12.2871405,7.7483057],[-12.28323,7.7431559],[-12.2802097,7.7392416],[-12.2777705,7.7336972],[-12.2689932,7.7251083],[-12.2675517,7.7217752],[-12.2610164,7.7177698],[-12.2531398,7.7108847],[-12.2486081,7.6994017],[-12.2473598,7.691842],[-12.2451603,7.6919794],[-12.2403188,7.6898227],[-12.2200019,7.6885766],[-12.2046569,7.6794418],[-12.1981454,7.6711371],[-12.1801806,7.6663096],[-12.1771432,7.6663568],[-12.1738816,7.6654743],[-12.1723473,7.6650172],[-12.171296,7.665081],[-12.1699011,7.6655701],[-12.1660602,7.6680901],[-12.1625734,7.6694298],[-12.1608354,7.6694191],[-12.1594727,7.6690471],[-12.1580673,7.6679199],[-12.1570182,7.6664983],[-12.1563936,7.6649427],[-12.1558894,7.6642729],[-12.1549559,7.6637306],[-12.1523595,7.6628481],[-12.1503317,7.6628268],[-12.1461691,7.6639219],[-12.1405327,7.6641689],[-12.1311555,7.6633352],[-12.1173596,7.6649866],[-12.1058718,7.6771225],[-12.1174127,7.6878767],[-12.113536,7.7014528],[-12.1091741,7.7202405],[-12.1170617,7.7328223],[-12.1298086,7.7565064],[-12.1366369,7.7654223],[-12.1330243,7.7769172],[-12.1294058,7.789389],[-12.1297981,7.7935534],[-12.1367688,7.7994267],[-12.1366383,7.8072021],[-12.1388834,7.822476],[-12.1354962,7.8427522],[-12.1441074,7.8491621],[-12.1479725,7.8561786],[-12.1363109,7.8774328],[-12.1341959,7.8999532],[-12.1346967,7.9250069],[-12.1385506,7.9450439],[-12.1370141,7.9644715],[-12.1280917,7.9762952],[-12.1192212,7.9751634],[-12.1087681,7.9779867],[-12.0956878,7.9783369],[-12.0800171,7.9781636],[-12.0517867,7.9733441],[-12.0315832,7.9912937],[-12.0172759,8.0015263],[-11.9997893,8.0015263],[-11.9751491,8.0093973],[-11.9441501,8.0078231],[-11.9242789,7.992868],[-11.9012284,7.9889323],[-11.8908954,7.9794867],[-11.8479736,7.9865709],[-11.8336664,7.9810609],[-11.8503582,8.0117586],[-11.8646654,8.026713],[-11.8829469,8.0337964],[-11.9195098,8.065277],[-11.9242789,8.0770816],[-11.9240086,8.0772761],[-11.9155356,8.0833773],[-11.9107665,8.1101327],[-11.8964593,8.1242966],[-11.8861263,8.1455415],[-11.8726139,8.1628513],[-11.8265128,8.1612777],[-11.8158131,8.153767],[-11.8112744,8.1700583],[-11.7995046,8.2033638],[-11.8161798,8.2706274],[-11.8519479,8.3107409],[-11.830487,8.3296165],[-11.8273076,8.3437725],[-11.8446399,8.358761],[-11.8548148,8.3473518],[-11.8731297,8.3413115],[-11.9002628,8.3399691],[-11.927396,8.3547343],[-11.9477458,8.3540631],[-11.9660607,8.3661433],[-11.9803056,8.3674855],[-11.9941715,8.373717],[-11.9954319,8.3743652],[-11.9963961,8.3753704],[-11.9965049,8.3759115],[-11.9964047,8.3770762],[-11.9954316,8.3804794],[-11.9952776,8.3817146],[-11.9955512,8.3886713],[-11.9956368,8.3894272],[-11.99614,8.3899649],[-11.9968057,8.3904508],[-11.9975298,8.3906418],[-11.9981356,8.3902766],[-11.9994881,8.3889546],[-12.0008532,8.3871577],[-12.0028362,8.3832252],[-12.0045555,8.3794141],[-12.0061007,8.3765986],[-12.0073865,8.3747589],[-12.0080404,8.3741638],[-12.0090447,8.3734271],[-12.0109331,8.3726362],[-12.0130531,8.372163],[-12.0160675,8.3721667],[-12.0200078,8.3722909],[-12.0227874,8.3716749],[-12.0238471,8.3709225],[-12.0243324,8.3699765],[-12.0251085,8.3668302],[-12.0259155,8.3626733],[-12.0268966,8.3595104],[-12.0274438,8.358502],[-12.0282162,8.3580137],[-12.029535,8.3578133],[-12.0311246,8.3579065],[-12.0328846,8.3582269],[-12.034082,8.3586881],[-12.0349314,8.3596846],[-12.0354348,8.3610485],[-12.0355445,8.3621156],[-12.0352471,8.3637587],[-12.0343837,8.3673066],[-12.0343105,8.3686993],[-12.0346516,8.369469],[-12.0350783,8.3697845],[-12.0357208,8.3697723],[-12.0367678,8.3693226],[-12.0385594,8.3682374],[-12.0414662,8.3661936],[-12.0429791,8.3645949],[-12.043404,8.3636614],[-12.043404,8.3608941],[-12.0438267,8.358364],[-12.0439447,8.3566126],[-12.0436204,8.353875],[-12.0437516,8.3520693],[-12.0444382,8.3504452],[-12.0463839,8.3478711],[-12.0497926,8.3437852],[-12.0511553,8.3418116],[-12.052374,8.3387931],[-12.0528738,8.33738],[-12.0547751,8.3345402],[-12.055943,8.3328832],[-12.0563873,8.3323951],[-12.0579743,8.3306512],[-12.0632177,8.325672],[-12.0645847,8.3240953],[-12.0659629,8.3224188],[-12.0670282,8.3205946],[-12.0675577,8.3192023],[-12.0677735,8.3179936],[-12.0676617,8.3166525],[-12.0672352,8.3157053],[-12.0666662,8.3151735],[-12.0653325,8.3144761],[-12.0639666,8.3134281],[-12.0628222,8.3123771],[-12.061193,8.3103611],[-12.0598634,8.3081231],[-12.0579044,8.3044448],[-12.0564683,8.3017356],[-12.0554504,8.2991393],[-12.0543529,8.2964902],[-12.0534841,8.2948601],[-12.0525484,8.2936777],[-12.05153,8.2925993],[-12.0501965,8.2917946],[-12.0490088,8.2914822],[-12.04744,8.2910939],[-12.0464553,8.2911555],[-12.0452751,8.291336],[-12.0443799,8.2918071],[-12.0439174,8.2922933],[-12.043008,8.2935776],[-12.042243,8.2945598],[-12.0406565,8.2960745],[-12.0387948,8.2977272],[-12.0381457,8.2980722],[-12.0374108,8.2982049],[-12.0366176,8.2980796],[-12.035789,8.2976053],[-12.0347505,8.2967645],[-12.0339752,8.2953693],[-12.0336343,8.2940326],[-12.0336288,8.2933743],[-12.033826,8.2918877],[-12.03411,8.2907573],[-12.034294,8.2902371],[-12.0345414,8.2899554],[-12.034911,8.2898018],[-12.0364512,8.2896528],[-12.0375932,8.2892975],[-12.0382519,8.2888706],[-12.0390093,8.2876307],[-12.0394976,8.2863249],[-12.0396212,8.2857349],[-12.0381998,8.2806584],[-12.0358913,8.2759975],[-12.0333976,8.2711729],[-12.0329482,8.2697535],[-12.0328259,8.267839],[-12.0357586,8.2552482],[-12.0357769,8.2535507],[-12.0355977,8.2528379],[-12.0347604,8.2511978],[-12.0323273,8.246715],[-12.0298363,8.2412857],[-12.0295037,8.2392975],[-12.0297129,8.2384984],[-12.0302487,8.2378053],[-12.0310894,8.2371735],[-12.0316654,8.2368367],[-12.0322785,8.2368504],[-12.033189,8.2372156],[-12.033757,8.2377435],[-12.0340526,8.2382648],[-12.0342158,8.2390875],[-12.0340171,8.2404042],[-12.0340308,8.2417965],[-12.0345702,8.2448447],[-12.0351393,8.2460311],[-12.0362747,8.2477613],[-12.0373142,8.2494402],[-12.0378345,8.2500932],[-12.0387145,8.2504447],[-12.0409792,8.2508473],[-12.043419,8.2507462],[-12.0465992,8.2499397],[-12.0490945,8.2490686],[-12.0539934,8.2479719],[-12.0546091,8.2479299],[-12.0551977,8.2480339],[-12.0563699,8.2485533],[-12.0584447,8.2500455],[-12.0555208,8.2542133],[-12.0895165,8.2788893],[-12.1010481,8.2762042],[-12.1268246,8.2943279],[-12.1431045,8.2976841],[-12.1702376,8.3325864],[-12.2387488,8.3399691],[-12.2672386,8.3607744],[-12.2787702,8.3621166],[-12.2950501,8.3547343],[-12.3106517,8.3372845],[-12.3276099,8.3379557],[-12.3655963,8.3554054],[-12.3832328,8.353392],[-12.3951672,8.3191698],[-12.415997,8.3113955],[-12.4306809,8.3155313],[-12.4423262,8.3080359],[-12.451944,8.3030189],[-12.4565952,8.2995013],[-12.4601583,8.2932219],[-12.4647225,8.2936176],[-12.4795555,8.3037251],[-12.4938004,8.2956704],[-12.5107586,8.2970129],[-12.5195769,8.288958],[-12.5240489,8.287975],[-12.533814,8.2898975],[-12.5417547,8.2938515],[-12.5469709,8.2944914],[-12.5510064,8.2965185],[-12.5534378,8.2982634],[-12.5629899,8.3037251],[-12.5721298,8.3052321],[-12.5822338,8.3068864],[-12.5932874,8.3108825],[-12.5950065,8.3170065],[-12.5984471,8.322183],[-12.5990614,8.328413],[-12.6030454,8.3326678],[-12.6041521,8.3410207],[-12.6144216,8.3410179],[-12.6194167,8.3500871],[-12.6326182,8.3547351],[-12.6410403,8.3540286],[-12.6479456,8.3579738],[-12.6477976,8.3641151],[-12.6461045,8.3670943],[-12.6466071,8.3675237],[-12.6476558,8.3673109],[-12.649081,8.3683617],[-12.6501566,8.3679892],[-12.6518775,8.3685878],[-12.6522943,8.3700909],[-12.653585,8.3709422],[-12.6538937,8.3737882],[-12.6540068,8.374138],[-12.6542258,8.3741684],[-12.6556349,8.3720814],[-12.6559325,8.3721321],[-12.6569059,8.3728178],[-12.6582839,8.372345],[-12.6591631,8.3721176],[-12.6598788,8.3726247],[-12.6601449,8.3746977],[-12.6603815,8.3748839],[-12.6662852,8.3764541],[-12.6679584,8.3756264],[-12.6694304,8.3754842],[-12.669686,8.3752718],[-12.6697495,8.3743308],[-12.6705833,8.3733578],[-12.6708633,8.3726489],[-12.6705181,8.3709219],[-12.6707917,8.3705289],[-12.6730723,8.3701526],[-12.6732979,8.3699253],[-12.6731683,8.3666722],[-12.6733774,8.3657692],[-12.674813,8.3643301],[-12.679015,8.365995],[-12.6785777,8.367735],[-12.6785515,8.3689947],[-12.6808367,8.3696208],[-12.6841266,8.3687035],[-12.6850395,8.3679513],[-12.6862197,8.367824],[-12.6875608,8.368015],[-12.6882152,8.3676222],[-12.6894061,8.3663698],[-12.6896314,8.3661893],[-12.6912622,8.3660619],[-12.6954385,8.3640417],[-12.6962311,8.3639619],[-12.6996152,8.3642341],[-12.7039671,8.3636658],[-12.7068198,8.3641555],[-12.7072936,8.3640216],[-12.708188,8.3633347],[-12.7092505,8.3634355],[-12.7101965,8.3645443],[-12.7115065,8.3651779],[-12.7140281,8.365511],[-12.7181269,8.3665549],[-12.7192973,8.3677096],[-12.7196684,8.3679107],[-12.7198599,8.3676437],[-12.7186835,8.3646452],[-12.7182229,8.3625314],[-12.7223929,8.3591121],[-12.7225697,8.3586663],[-12.7224106,8.3580718],[-12.7208744,8.3575697],[-12.7207317,8.3574774],[-12.7206457,8.3573115],[-12.7206257,8.356743],[-12.7181251,8.3540154],[-12.7179924,8.3537181],[-12.7180809,8.3534559],[-12.7195614,8.3523123],[-12.7205002,8.3513941],[-12.7215572,8.3508255],[-12.7231012,8.3506496],[-12.7252572,8.3491371],[-12.7263974,8.3493357],[-12.7271128,8.3490847],[-12.727696,8.3486563],[-12.727749,8.347887],[-12.7286415,8.3476684],[-12.7309476,8.3473362],[-12.7315221,8.3475285],[-12.7318579,8.3495393],[-12.7318137,8.3497841],[-12.7320257,8.3502125],[-12.7323704,8.3501513],[-12.7330154,8.3497142],[-12.7342348,8.3497666],[-12.7357193,8.3492594],[-12.7368415,8.3496092],[-12.7390331,8.3514098],[-12.7407233,8.3515759],[-12.7410499,8.3511653],[-12.7411548,8.3494767],[-12.7416223,8.3490497],[-12.7436601,8.3493461],[-12.7437201,8.3497257],[-12.7431087,8.3502476],[-12.7434622,8.3513052],[-12.7448229,8.3515285],[-12.7454354,8.353486],[-12.748447,8.354763],[-12.7536624,8.3518698],[-12.7533947,8.3569978],[-12.7567291,8.3575299],[-12.7601793,8.3590194],[-12.7606278,8.3590642],[-12.7610414,8.3608904],[-12.7613986,8.3625195],[-12.7620647,8.3643271],[-12.762493,8.3651368],[-12.7631971,8.3660783],[-12.7644247,8.3665867],[-12.7649671,8.3674246],[-12.7653953,8.3685732],[-12.7657284,8.3698818],[-12.7654429,8.3705691],[-12.7647768,8.3713034],[-12.7647863,8.3719813],[-12.7650908,8.3729792],[-12.7656713,8.373723],[-12.7663089,8.3737512],[-12.7670226,8.3724238],[-12.7681074,8.3721131],[-12.7700677,8.3725744],[-12.7710954,8.3732993],[-12.7713333,8.3736382],[-12.7715141,8.3752575],[-12.772009,8.375813],[-12.7758534,8.3787597],[-12.7762626,8.3790328],[-12.7773379,8.379174],[-12.7792887,8.3789669],[-12.780345,8.3793811],[-12.7808208,8.3806709],[-12.7823624,8.3842766],[-12.7827621,8.3857452],[-12.7831522,8.386809],[-12.7835995,8.3874586],[-12.7848936,8.3875715],[-12.7867302,8.3869314],[-12.7881767,8.3858487],[-12.7891092,8.3853498],[-12.7895184,8.3853404],[-12.7900228,8.385764],[-12.7902226,8.3871291],[-12.790156,8.3887107],[-12.7897373,8.3920433],[-12.7898895,8.3929564],[-12.7905747,8.3930977],[-12.7916024,8.392401],[-12.7924113,8.391855],[-12.7941527,8.3911772],[-12.7970551,8.3911678],[-12.7984254,8.3903299],[-12.7994341,8.3894073],[-12.800852,8.3884],[-12.8013087,8.3883153],[-12.8030311,8.3881458],[-12.8050676,8.3881364],[-12.8062951,8.3879575],[-12.8079033,8.3873927],[-12.8085028,8.3875998],[-12.8092451,8.3884753],[-12.8099969,8.390151],[-12.8104441,8.3931353],[-12.8107201,8.3943591],[-12.8111007,8.395037],[-12.8136986,8.3963737],[-12.8156874,8.396835],[-12.8161836,8.3967126],[-12.8169792,8.3965165],[-12.8189171,8.3948923],[-12.819738,8.394413],[-12.8206128,8.3944529],[-12.8225513,8.3948104],[-12.8246097,8.3952917],[-12.8278799,8.3962369],[-12.8293603,8.3963168],[-12.830235,8.3957177],[-12.8298582,8.3940402],[-12.828795,8.3923228],[-12.827207,8.3906719],[-12.8265745,8.3886083],[-12.8262919,8.3863849],[-12.8266687,8.383083],[-12.8268168,8.3806599],[-12.8263996,8.3791421],[-12.8248789,8.3772648],[-12.824354,8.3759734],[-12.8246097,8.3746819],[-12.8253499,8.374136],[-12.8298582,8.3732706],[-12.8326036,8.3731641],[-12.834205,8.3735635],[-12.8359814,8.3737233],[-12.8387403,8.3728978],[-12.8399918,8.3718859],[-12.8406916,8.3707009],[-12.8409473,8.3683177],[-12.8407185,8.3663471],[-12.8398169,8.3636976],[-12.8377175,8.3604355],[-12.8374618,8.3592372],[-12.8377309,8.3580388],[-12.8386057,8.3571867],[-12.8397092,8.3569204],[-12.8416067,8.356694],[-12.843114,8.3553759],[-12.845348,8.3529925],[-12.8464111,8.3521936],[-12.8477434,8.3518741],[-12.8490623,8.3518208],[-12.850731,8.3523135],[-12.8525882,8.3527395],[-12.8535841,8.3524067],[-12.8541089,8.3516877],[-12.8547145,8.3505026],[-12.855522,8.3494774],[-12.8558853,8.3485853],[-12.8556296,8.347307],[-12.8545934,8.345829],[-12.8535437,8.3446839],[-12.8525478,8.3437918],[-12.8512559,8.342913],[-12.8481068,8.3418877],[-12.8472993,8.3408624],[-12.8472859,8.339451],[-12.8475012,8.3375736],[-12.8479857,8.3343912],[-12.8486855,8.3332993],[-12.849937,8.3328199],[-12.8519422,8.332234],[-12.8540282,8.3319145],[-12.8587787,8.3316881],[-12.8607166,8.3320077],[-12.8619238,8.332618],[-12.8631659,8.333246],[-12.8638253,8.3328865],[-12.8658709,8.3292247],[-12.8683067,8.3245775],[-12.8687912,8.3219542],[-12.8688228,8.321074],[-12.868872,8.3197038],[-12.868549,8.3183589],[-12.8675666,8.3158422],[-12.8657767,8.3135518],[-12.8649154,8.3130324],[-12.8639061,8.3128993],[-12.8628698,8.3123933],[-12.8622373,8.3093571],[-12.8628698,8.3082252],[-12.8657632,8.3040439],[-12.8679299,8.3039773],[-12.8705945,8.3024991],[-12.8720614,8.3021929],[-12.8732995,8.3022994],[-12.8754259,8.3032848],[-12.8760853,8.3041637],[-12.8774041,8.3074396],[-12.878077,8.3089576],[-12.8786422,8.3099164],[-12.8825046,8.3116875],[-12.8840791,8.3113812],[-12.8845636,8.3107554],[-12.8845636,8.3089976],[-12.8858017,8.3026589],[-12.8853711,8.299423],[-12.8856268,8.2962403],[-12.8865419,8.2946556],[-12.8887759,8.2923917],[-12.8924363,8.2895419],[-12.8930958,8.2882235],[-12.8928401,8.2865056],[-12.8918577,8.2854269],[-12.8871878,8.2852937],[-12.8861382,8.2837089],[-12.8836216,8.2815782],[-12.883016,8.28006],[-12.883164,8.2786617],[-12.8837965,8.278129],[-12.8873763,8.2767173],[-12.8905119,8.2759449],[-12.8926247,8.2746265],[-12.8942262,8.2738674],[-12.898896,8.2727886],[-12.9001341,8.2732814],[-12.9022335,8.2766108],[-12.9037408,8.2769837],[-12.9053288,8.2766774],[-12.9087201,8.2732548],[-12.9118692,8.2719097],[-12.9131386,8.27061],[-12.9132414,8.2689302],[-12.9123773,8.2663943],[-12.9123475,8.26377],[-12.9137777,8.2624726],[-12.9159826,8.2625905],[-12.9197966,8.2629149],[-12.9225033,8.2619426],[-12.9238191,8.26147],[-12.9288248,8.2598187],[-12.9317449,8.2597892],[-12.9337125,8.261493],[-12.9351062,8.2633576],[-12.935988,8.2645372],[-12.9385163,8.2654963],[-12.9405389,8.2653712],[-12.9443314,8.2634113],[-12.9486295,8.2599501],[-12.9491868,8.2577444],[-12.9493037,8.2572812],[-12.9492616,8.2529442],[-12.9508207,8.2499834],[-12.9552031,8.2493995],[-12.9568654,8.2500952],[-12.9614817,8.2520268],[-12.9648528,8.2543204],[-12.9651899,8.2567808],[-12.9646,8.2622437],[-12.966749,8.2649959],[-12.971611,8.2657177],[-12.9718056,8.2657465],[-12.9750081,8.2638283],[-12.9787378,8.2558972],[-12.9792553,8.2545692],[-12.9825517,8.2461072],[-12.9839353,8.2439921],[-12.9869588,8.2393701],[-12.988534,8.236962],[-12.9862281,8.2361336],[-12.9866661,8.23509],[-12.9870201,8.2341344],[-12.9872991,8.232977],[-12.9871408,8.2313099],[-12.9862047,8.2279173],[-12.9855878,8.225284],[-12.9855288,8.224546],[-12.9854913,8.2237974],[-12.9855342,8.2232718],[-12.9857514,8.222839],[-12.9859231,8.2225683],[-12.9860304,8.2221648],[-12.9860679,8.2217506],[-12.9860384,8.2211852],[-12.9860009,8.2207127],[-12.9860492,8.2204791],[-12.9861886,8.2202295],[-12.986312,8.2201287],[-12.986489,8.21998],[-12.986591,8.2198207],[-12.9866553,8.2191517],[-12.986666,8.2187482],[-12.9868002,8.2181164],[-12.9871435,8.2174368],[-12.9879293,8.2169431],[-12.9886925,8.2171301],[-12.9893161,8.2172829]]],[[[-12.9891819,7.9147701],[-12.9891604,7.9149189],[-12.9892248,7.9150517],[-12.9896057,7.9150517],[-12.9899222,7.9149667],[-12.9899973,7.9148657],[-12.9899651,7.9147648],[-12.989713,7.9147329],[-12.9893804,7.9147595],[-12.9891819,7.9147701]]],[[[-12.9649723,7.9141325],[-12.9648865,7.9142759],[-12.9649241,7.9145734],[-12.9650903,7.9149507],[-12.9654122,7.9151579],[-12.9655194,7.9152058],[-12.9656215,7.9151738],[-12.9658803,7.9148222],[-12.9661632,7.9147913],[-12.966367,7.9148657],[-12.9664583,7.91477],[-12.9664798,7.9145893],[-12.9664835,7.9143643],[-12.9663564,7.9142068],[-12.9660882,7.9141111],[-12.9659164,7.9140156],[-12.9657931,7.9140421],[-12.9657018,7.9142016],[-12.9655785,7.9142493],[-12.9653263,7.9142388],[-12.9651387,7.9140952],[-12.9649723,7.9141325]]]]}]}
