# Supplementary material
Source: ML conference proceedings conference paper supplement (https://proceedings.neurips.cc/paper_files/paper/2022/hash/9d3faa41886997cfc2128b930077fa49-Abstract.html)
Supplement: Supplementary file 1 [file 9d3faa41886997cfc2128b930077fa49-Supplemental-Conference.zip › code/ebola/map/geojson/nimba.geojson]

{"type":"GeometryCollection","geometries":[{"type":"MultiPolygon","coordinates":[[[[-9.179203,6.6236271],[-9.1753125,6.6329786],[-9.1743322,6.6346442],[-9.1735067,6.6356948],[-9.1726038,6.6364123],[-9.1721136,6.6370529],[-9.1719072,6.6380266],[-9.1716235,6.6389235],[-9.1689147,6.642844],[-9.168373,6.6443046],[-9.167857,6.6496856],[-9.1674202,6.6533232],[-9.167388,6.6534398],[-9.1669283,6.6546566],[-9.1662576,6.6556303],[-9.1636521,6.6575777],[-9.1613045,6.6580645],[-9.1593439,6.6588076],[-9.158699,6.6591663],[-9.15857,6.6597813],[-9.15857,6.662933],[-9.1587248,6.6638042],[-9.1591633,6.6643166],[-9.1628007,6.6657771],[-9.1660254,6.6675451],[-9.1703852,6.6707992],[-9.1725522,6.6731053],[-9.1729907,6.6743608],[-9.1730423,6.6754882],[-9.172578,6.6797415],[-9.1718298,6.6804077],[-9.1676249,6.6826368],[-9.1667736,6.6824831],[-9.1661286,6.6818938],[-9.1647356,6.6793572],[-9.1648129,6.6785372],[-9.1652773,6.6775636],[-9.1652773,6.6767181],[-9.1648387,6.6759494],[-9.1639358,6.6757444],[-9.1631361,6.6760006],[-9.1625686,6.6763593],[-9.1614851,6.6776148],[-9.1593697,6.6807664],[-9.1590601,6.6817657],[-9.1591117,6.682893],[-9.1590343,6.6838154],[-9.158441,6.684661],[-9.1586426,6.6852647],[-9.1564243,6.6861093],[-9.1544647,6.6865703],[-9.1528872,6.6871579],[-9.1514313,6.6884306],[-9.1501548,6.6894077],[-9.1493823,6.6903445],[-9.1492966,6.6907194],[-9.1492035,6.6911278],[-9.1492256,6.6919313],[-9.1501377,6.6930183],[-9.1518889,6.6947575],[-9.152655,6.6955547],[-9.1559385,6.7004825],[-9.1563398,6.7018232],[-9.1565287,6.7035089],[-9.1560049,6.7054351],[-9.1541144,6.7067147],[-9.1525456,6.7074394],[-9.1517794,6.7072944],[-9.1509038,6.7066785],[-9.1502836,6.705519],[-9.1497364,6.7052291],[-9.1490432,6.7054828],[-9.1488243,6.7060263],[-9.1492986,6.7085626],[-9.1502107,6.709867],[-9.1521443,6.7113163],[-9.1537495,6.7120048],[-9.1577262,6.7125483],[-9.1587112,6.7129831],[-9.1601705,6.7146135],[-9.1605719,6.7157005],[-9.1606083,6.7167513],[-9.1598057,6.7179469],[-9.1595139,6.7190702],[-9.1597692,6.7201209],[-9.1602231,6.7212896],[-9.1595579,6.7221953],[-9.1576375,6.7231649],[-9.1564036,6.7238362],[-9.155438,6.7251041],[-9.1542686,6.7253279],[-9.1534961,6.7251361],[-9.1531957,6.7257115],[-9.1526807,6.7269688],[-9.1516937,6.7268516],[-9.1513416,6.725918],[-9.1519404,6.7248378],[-9.151007,6.7242198],[-9.1498269,6.7236018],[-9.1469637,6.7226572],[-9.1449571,6.7222586],[-9.1437896,6.722476],[-9.1427681,6.7235267],[-9.1423303,6.7254108],[-9.1425528,6.7277927],[-9.1439392,6.7317782],[-9.1446103,6.7336177],[-9.1447802,6.7348126],[-9.144377,6.7372129],[-9.1424798,6.7391693],[-9.1414583,6.7407635],[-9.1413124,6.7432272],[-9.1406557,6.7443141],[-9.1361517,6.748239],[-9.133857,6.7492073],[-9.1310776,6.748518],[-9.129385,6.7473832],[-9.1285277,6.7470856],[-9.1275774,6.7472909],[-9.1246449,6.7496498],[-9.1242896,6.7501852],[-9.1242383,6.7522848],[-9.124968,6.7536615],[-9.124692,6.756237],[-9.1250193,6.7571319],[-9.1258458,6.7579268],[-9.1281431,6.7591933],[-9.1293459,6.7608302],[-9.1307107,6.7616812],[-9.1338543,6.762071],[-9.1344457,6.7627095],[-9.1348914,6.7646028],[-9.1344536,6.767791],[-9.1348914,6.7690952],[-9.1366426,6.7704719],[-9.1379559,6.7722833],[-9.1395612,6.7723558],[-9.1405098,6.7737325],[-9.1409476,6.7782248],[-9.1403638,6.7798188],[-9.1394882,6.7802535],[-9.1381019,6.7797464],[-9.1353292,6.7785871],[-9.1337969,6.7784421],[-9.1302215,6.7801086],[-9.129127,6.7815578],[-9.1284703,6.7847458],[-9.1266462,6.7865572],[-9.1167958,6.7930056],[-9.1115422,6.7974977],[-9.1086236,6.8013377],[-9.1086236,6.804743],[-9.1091319,6.8082363],[-9.1122887,6.8138311],[-9.1127237,6.8150281],[-9.1123884,6.8168998],[-9.1113155,6.8192221],[-9.1096634,6.8214592],[-9.1077964,6.824442],[-9.1071669,6.8247506],[-9.1069888,6.8253871],[-9.1070956,6.8258644],[-9.1088694,6.828277],[-9.1110795,6.8308124],[-9.1120237,6.8307485],[-9.1131823,6.829811],[-9.1135686,6.8285114],[-9.1137188,6.8277444],[-9.1134184,6.8259334],[-9.1136973,6.8254647],[-9.1144698,6.8254434],[-9.1150139,6.825563],[-9.115829,6.8277211],[-9.1165354,6.8305806],[-9.1162509,6.8331559],[-9.1160148,6.8347539],[-9.116208,6.8361386],[-9.1165675,6.8392447],[-9.1173023,6.8403996],[-9.1176027,6.8418909],[-9.1170019,6.8427858],[-9.1157144,6.8437872],[-9.1143626,6.8445753],[-9.1138476,6.845811],[-9.1135257,6.8475016],[-9.1135053,6.8480218],[-9.1135257,6.8485242],[-9.1138262,6.8491207],[-9.1147703,6.8496746],[-9.1157788,6.8494829],[-9.1165942,6.848929],[-9.1170448,6.8487799],[-9.117431,6.8490142],[-9.1176671,6.8493977],[-9.1175812,6.8501433],[-9.1170233,6.8508038],[-9.116165,6.8511447],[-9.1144699,6.8512725],[-9.1125387,6.8508677],[-9.1110152,6.8502499],[-9.1088051,6.8492059],[-9.1078395,6.8493338],[-9.1067451,6.8500368],[-9.1054362,6.8509742],[-9.1042131,6.8517625],[-9.1036338,6.852359],[-9.1033958,6.8535345],[-9.1034135,6.8548004],[-9.103715,6.8555031],[-9.1043158,6.8560218],[-9.1055174,6.8566962],[-9.1071697,6.857577],[-9.1081782,6.8578753],[-9.1086504,6.8583606],[-9.1088567,6.8613574],[-9.1086504,6.8628173],[-9.1083924,6.8632784],[-9.1083924,6.8638931],[-9.1087278,6.8644565],[-9.1099402,6.8651993],[-9.1112817,6.865353],[-9.1120814,6.865814],[-9.1131907,6.8671971],[-9.1135003,6.8682216],[-9.114687,6.8720634],[-9.1148933,6.8733184],[-9.1145064,6.8764687],[-9.1139646,6.8772626],[-9.1124168,6.8788249],[-9.110353,6.8796957],[-9.1084698,6.8807714],[-9.1072573,6.8817703],[-9.1066382,6.8829484],[-9.1066124,6.883896],[-9.1070251,6.8846132],[-9.107799,6.8848437],[-9.1116687,6.8843827],[-9.1126748,6.8845107],[-9.1134229,6.8849717],[-9.1154093,6.8875073],[-9.1167766,6.8885572],[-9.1190725,6.8895817],[-9.1203624,6.8899146],[-9.1210589,6.8902476],[-9.1213943,6.8908878],[-9.1213943,6.8932953],[-9.1213943,6.8954722],[-9.1212395,6.8963174],[-9.1206204,6.8973418],[-9.120543,6.8980333],[-9.120801,6.8987248],[-9.1218255,6.9007023],[-9.1223434,6.9011308],[-9.1225017,6.9018378],[-9.1222715,6.9029304],[-9.1218687,6.9032589],[-9.1216457,6.9042301],[-9.1220614,6.9048836],[-9.1229117,6.9053727],[-9.1243072,6.9062439],[-9.1250769,6.9068652],[-9.125717,6.9074865],[-9.1267746,6.9079507],[-9.128242,6.9075222],[-9.1298606,6.9072651],[-9.1306086,6.9072651],[-9.1312129,6.9070509],[-9.131504,6.9068473],[-9.1316732,6.9065796],[-9.1318244,6.9061083],[-9.1317668,6.9052585],[-9.1323639,6.9037731],[-9.1323639,6.902759],[-9.1328674,6.9021663],[-9.1334213,6.9021234],[-9.1342989,6.9027947],[-9.135022,6.9037324],[-9.1358151,6.9052811],[-9.1369748,6.9070937],[-9.1385142,6.9088219],[-9.1395213,6.9093718],[-9.1402478,6.9096503],[-9.1410967,6.9099859],[-9.1416721,6.9104001],[-9.1417801,6.9110214],[-9.1419167,6.911457],[-9.1420966,6.9125139],[-9.1419383,6.9130352],[-9.1416002,6.9133708],[-9.1414922,6.9140135],[-9.1410247,6.9145063],[-9.1408953,6.9153204],[-9.1409096,6.9167986],[-9.1410391,6.9180982],[-9.1411039,6.9186624],[-9.1412837,6.9191908],[-9.1418951,6.9197264],[-9.1422476,6.9200692],[-9.1428407,6.920701],[-9.1435281,6.9212474],[-9.1442762,6.9218544],[-9.145388,6.9232358],[-9.1464738,6.925032],[-9.1470241,6.9257248],[-9.1479088,6.926646],[-9.1503402,6.929181],[-9.1521457,6.9304735],[-9.1535988,6.9310591],[-9.1551886,6.9310091],[-9.1561525,6.9313804],[-9.156807,6.931409],[-9.1571068,6.9319335],[-9.1571236,6.9323373],[-9.1569077,6.933137],[-9.1558791,6.9372359],[-9.1552389,6.9403064],[-9.154872,6.9425771],[-9.1550922,6.9433814],[-9.1552318,6.9440124],[-9.1551094,6.9444408],[-9.1539154,6.9448121],[-9.1534478,6.9464831],[-9.1539585,6.9468258],[-9.1555841,6.9472257],[-9.1574977,6.9476827],[-9.1583824,6.9483253],[-9.1598931,6.9490894],[-9.1605284,6.9498908],[-9.1614405,6.9521362],[-9.1619513,6.953114],[-9.1631917,6.9545625],[-9.1636756,6.9569323],[-9.1640137,6.9578284],[-9.163877,6.9584068],[-9.1641905,6.9590556],[-9.1644021,6.9592065],[-9.165384,6.9592065],[-9.1665314,6.9591958],[-9.1673514,6.9596992],[-9.1681534,6.9604293],[-9.1688477,6.960506],[-9.1695454,6.9604025],[-9.1701317,6.9601919],[-9.1705813,6.9595492],[-9.1717106,6.9593207],[-9.17334,6.9588995],[-9.1745592,6.9579498],[-9.1769439,6.9571822],[-9.1777927,6.9574607],[-9.1782063,6.9578677],[-9.1790264,6.9582711],[-9.1799327,6.9583889],[-9.1806306,6.9592342],[-9.1808211,6.9600348],[-9.1811049,6.9606104],[-9.1814901,6.9629695],[-9.1815117,6.9642405],[-9.1816915,6.9654043],[-9.1822634,6.966329],[-9.1835582,6.9670466],[-9.1859572,6.9686032],[-9.1868564,6.9696385],[-9.1876477,6.9706025],[-9.1879786,6.9721733],[-9.1880002,6.9741904],[-9.1882556,6.9747698],[-9.1888758,6.9750233],[-9.1918271,6.9747938],[-9.1920358,6.9749086],[-9.1925212,6.9751758],[-9.1926795,6.9757827],[-9.1933329,6.9769862],[-9.1930023,6.9777385],[-9.1923054,6.9785766],[-9.1921957,6.9798758],[-9.1919799,6.9810353],[-9.1926335,6.9823745],[-9.1925852,6.9828983],[-9.1918837,6.9836286],[-9.1904446,6.9845473],[-9.1900432,6.9851267],[-9.1893555,6.9865063],[-9.1894595,6.9869735],[-9.1888367,6.9873177],[-9.1883227,6.9869525],[-9.1878179,6.9870938],[-9.1873885,6.9876554],[-9.1872884,6.9885256],[-9.1875989,6.989798],[-9.1878954,6.9907845],[-9.1882538,6.9909086],[-9.1883285,6.9912827],[-9.1880817,6.9919059],[-9.1872791,6.9923195],[-9.1860604,6.9921815],[-9.1847968,6.991953],[-9.1834763,6.9911379],[-9.1826258,6.9908804],[-9.1817654,6.9908297],[-9.1811779,6.9911379],[-9.1800428,6.9923327],[-9.1800266,6.9930463],[-9.1794632,6.9936003],[-9.1787277,6.9944802],[-9.1780724,6.9946934],[-9.1777631,6.9944599],[-9.1768277,6.9945604],[-9.1760642,6.9941671],[-9.1755962,6.994056],[-9.1753847,6.9938264],[-9.1751181,6.9930312],[-9.174465,6.9929847],[-9.1734434,6.9932019],[-9.1727325,6.9936976],[-9.1719848,6.9945559],[-9.1710594,6.9947599],[-9.1709573,6.9956458],[-9.1709991,6.9965334],[-9.171543,6.9972108],[-9.1716745,6.998312],[-9.1717864,6.9990744],[-9.171761,7.0000084],[-9.1718611,7.0007238],[-9.1718068,7.0011998],[-9.1715098,7.0014219],[-9.1705834,7.0017285],[-9.1694608,7.0017748],[-9.1685877,7.0016549],[-9.1682208,7.0007909],[-9.1677138,7.0005555],[-9.1670622,7.0004005],[-9.1662452,7.0008856],[-9.1655476,7.0019001],[-9.1646749,7.003183],[-9.1639926,7.0040647],[-9.1635956,7.0047704],[-9.1638729,7.007491],[-9.1641241,7.0083096],[-9.1648699,7.0088089],[-9.1664752,7.0099314],[-9.1677521,7.0112712],[-9.1682162,7.0129183],[-9.1688686,7.0133705],[-9.1699266,7.0129397],[-9.1708021,7.0132486],[-9.1717236,7.0143086],[-9.1719535,7.0157576],[-9.17185,7.0171153],[-9.1715728,7.0174636],[-9.1715448,7.0178094],[-9.1717991,7.0180088],[-9.1720026,7.0184607],[-9.1722267,7.0185692],[-9.1724511,7.0196187],[-9.1713982,7.0199411],[-9.1710676,7.0208549],[-9.1709452,7.0222103],[-9.1707976,7.0230049],[-9.1709626,7.0236912],[-9.1720936,7.0260086],[-9.1731356,7.026629],[-9.1737474,7.0271233],[-9.1739542,7.0277466],[-9.1734799,7.0282973],[-9.1725679,7.0286518],[-9.1714004,7.0283984],[-9.1708955,7.0281816],[-9.1705293,7.0275942],[-9.1698722,7.0272562],[-9.1688578,7.0272976],[-9.1682751,7.0277004],[-9.16828,7.0286489],[-9.1660594,7.0289698],[-9.1653868,7.0296623],[-9.1648671,7.0296857],[-9.1646028,7.0288342],[-9.164087,7.028503],[-9.1624088,7.0299051],[-9.1608998,7.031215],[-9.1608154,7.032361],[-9.1610996,7.0341672],[-9.160801,7.0355951],[-9.1610672,7.0366695],[-9.1609769,7.0373513],[-9.1600673,7.0378761],[-9.1594343,7.0384258],[-9.1583193,7.0389398],[-9.1576467,7.0393646],[-9.1574197,7.0404787],[-9.1578832,7.0423591],[-9.1574361,7.0435453],[-9.1564175,7.0462687],[-9.1567359,7.0471629],[-9.1571157,7.0476292],[-9.157721,7.0478211],[-9.1590384,7.0486792],[-9.1607123,7.0486686],[-9.1614138,7.0494819],[-9.1615104,7.0504511],[-9.1619377,7.0511275],[-9.1628603,7.0515175],[-9.1635869,7.0519173],[-9.1643161,7.0531903],[-9.1641407,7.0566035],[-9.1654176,7.0579318],[-9.1660825,7.0579499],[-9.1668947,7.058097],[-9.1672159,7.0584423],[-9.1666369,7.0599307],[-9.1662916,7.0610587],[-9.1658891,7.061426],[-9.1646913,7.0626059],[-9.163537,7.0641447],[-9.1566758,7.0716699],[-9.1565273,7.0723249],[-9.1568646,7.0732734],[-9.1568109,7.0737989],[-9.154152,7.0753149],[-9.1526718,7.0755943],[-9.1426,7.0805806],[-9.1423173,7.0811186],[-9.1417992,7.0817891],[-9.1414588,7.0822629],[-9.1407172,7.0828729],[-9.1403921,7.08375],[-9.1395133,7.084743],[-9.1388733,7.0855597],[-9.1382727,7.0864141],[-9.137644,7.0867392],[-9.137009,7.0872786],[-9.1364401,7.0882313],[-9.1361939,7.0892074],[-9.1353886,7.0899956],[-9.1347384,7.0909886],[-9.1336666,7.0920371],[-9.1327574,7.0938014],[-9.1316479,7.0955251],[-9.131523,7.0963924],[-9.1314163,7.0972241],[-9.1311658,7.097929],[-9.1314519,7.0982574],[-9.1321229,7.0986652],[-9.1326546,7.0987339],[-9.1330125,7.0986181],[-9.1342711,7.0976778],[-9.1353886,7.0974862],[-9.1363321,7.0976425],[-9.1365911,7.0978703],[-9.1366077,7.0985851],[-9.1364292,7.0990971],[-9.1359212,7.1001771],[-9.1357143,7.1008473],[-9.1342367,7.1061946],[-9.1323301,7.1105753],[-9.1308132,7.1135501],[-9.1292248,7.1156522],[-9.1288444,7.1175538],[-9.1284077,7.121281],[-9.126226,7.1280984],[-9.1247097,7.1345515],[-9.1235339,7.136974],[-9.1214519,7.1433997],[-9.1208237,7.145339],[-9.121071,7.1466205],[-9.1204709,7.148887],[-9.1211144,7.1498509],[-9.1206535,7.1510847],[-9.1215035,7.1546708],[-9.1170968,7.160018],[-9.1130575,7.1660697],[-9.1131633,7.1666285],[-9.1141973,7.168823],[-9.1141344,7.1696511],[-9.1135759,7.1703564],[-9.1117038,7.171588],[-9.1109737,7.1724597],[-9.1104786,7.1737065],[-9.1102577,7.1740331],[-9.108356,7.1748723],[-9.1067532,7.1778507],[-9.1068165,7.1787064],[-9.1084129,7.181658],[-9.10893,7.1817416],[-9.1097069,7.1813427],[-9.1102438,7.1812063],[-9.1110595,7.1816605],[-9.1116464,7.1826358],[-9.1116934,7.1853898],[-9.1105527,7.1888798],[-9.1096804,7.189918],[-9.1086377,7.1903979],[-9.1081888,7.1906045],[-9.1077684,7.1906567],[-9.1072592,7.1908807],[-9.1068587,7.191433],[-9.1065937,7.1918797],[-9.1064375,7.1929533],[-9.106251,7.1953437],[-9.1060266,7.1971845],[-9.1058183,7.198459],[-9.1059249,7.1993909],[-9.1061702,7.2006593],[-9.10616,7.2012448],[-9.1058674,7.201593],[-9.1053928,7.2018488],[-9.1045703,7.2021127],[-9.103977,7.2025673],[-9.1033018,7.2035132],[-9.1027617,7.2042114],[-9.102463,7.2048812],[-9.1022462,7.205612],[-9.1024328,7.2059642],[-9.1028436,7.2061925],[-9.1029745,7.2064685],[-9.1027208,7.2066918],[-9.1024835,7.2067973],[-9.1021316,7.2068136],[-9.1014138,7.2067276],[-9.1008591,7.2064796],[-9.1002952,7.2068087],[-9.1000009,7.2070925],[-9.0990896,7.2073081],[-9.0987377,7.2078399],[-9.0978334,7.209009],[-9.0968105,7.2097886],[-9.0966468,7.2102067],[-9.0962417,7.2104096],[-9.095943,7.2104989],[-9.0956934,7.2104217],[-9.0953988,7.2101822],[-9.0951942,7.2099752],[-9.0949528,7.2093988],[-9.0949446,7.208867],[-9.0950387,7.2084042],[-9.0947277,7.2081119],[-9.0941467,7.2078886],[-9.0932179,7.2077262],[-9.0926818,7.2077993],[-9.0923299,7.2077465],[-9.0921049,7.2075639],[-9.0918962,7.2070848],[-9.0916671,7.2061633],[-9.0915677,7.2058414],[-9.0914666,7.2055138],[-9.0913561,7.2047304],[-9.0915811,7.2034435],[-9.0915055,7.2028694],[-9.0910246,7.2027006],[-9.0905909,7.2024773],[-9.089748,7.2024448],[-9.0882299,7.2025991],[-9.0870188,7.2026153],[-9.0867261,7.20253],[-9.0854189,7.2021485],[-9.0847314,7.2022256],[-9.084445,7.2026437],[-9.0841422,7.2031228],[-9.0838517,7.203208],[-9.0833566,7.2029847],[-9.0827878,7.2026072],[-9.0816585,7.2023027],[-9.0813598,7.2020592],[-9.0814416,7.2015192],[-9.0816912,7.2008941],[-9.0815398,7.2005247],[-9.0811265,7.200411],[-9.0807583,7.2005368],[-9.0804983,7.2007471],[-9.0799849,7.201162],[-9.0795307,7.2018927],[-9.0792758,7.2026704],[-9.0793793,7.203139],[-9.0795174,7.2037769],[-9.0796412,7.2045761],[-9.0795594,7.2049414],[-9.0793384,7.2050713],[-9.0790852,7.2050772],[-9.0789783,7.2050795],[-9.0783932,7.2047587],[-9.0769856,7.2037763],[-9.0765273,7.2031512],[-9.0759913,7.2024935],[-9.074821,7.2013975],[-9.0744855,7.2008454],[-9.0743218,7.2002324],[-9.0742482,7.1997939],[-9.0741336,7.1996275],[-9.0738922,7.1995422],[-9.0734544,7.1994854],[-9.0727301,7.199388],[-9.0719404,7.1990957],[-9.0714821,7.198905],[-9.0711875,7.1986208],[-9.0707088,7.1985599],[-9.0702177,7.1983528],[-9.0698822,7.1985111],[-9.0696858,7.1989252],[-9.0696146,7.1993683],[-9.0695426,7.1996884],[-9.0697355,7.2000088],[-9.0705962,7.2009218],[-9.0715148,7.2017588],[-9.0718626,7.2020988],[-9.0719936,7.2024367],[-9.0719527,7.2027249],[-9.0716008,7.2028548],[-9.0712243,7.2029401],[-9.0708029,7.2031228],[-9.0703282,7.2035287],[-9.0699406,7.2044092],[-9.0693953,7.2055382],[-9.0685605,7.2063907],[-9.0678895,7.2071778],[-9.067378,7.2075436],[-9.0669361,7.2077912],[-9.0653294,7.2084689],[-9.0646687,7.2085893],[-9.0639468,7.2085518],[-9.0634084,7.2084666],[-9.0630368,7.2082161],[-9.0620578,7.2075854],[-9.0614623,7.2071435],[-9.0611864,7.2072763],[-9.0610193,7.2074624],[-9.0606388,7.2077953],[-9.0602623,7.2082053],[-9.0596608,7.2088791],[-9.0586952,7.2104584],[-9.0586829,7.2107303],[-9.058376,7.2113595],[-9.058466,7.2117411],[-9.0583474,7.2123134],[-9.0582451,7.212622],[-9.05802,7.2128168],[-9.0577459,7.2130523],[-9.0572252,7.2135441],[-9.0566615,7.213925],[-9.0557791,7.2141573],[-9.0551121,7.2142616],[-9.0547506,7.2146273],[-9.0545297,7.2148506],[-9.05421,7.2151584],[-9.0536336,7.2160441],[-9.0534781,7.2165028],[-9.0534985,7.2168153],[-9.053564,7.2170751],[-9.0542678,7.2182443],[-9.0542473,7.218638],[-9.053931,7.2187559],[-9.0537278,7.2186481],[-9.05329,7.2184349],[-9.052716,7.218107],[-9.052039,7.2175322],[-9.0517747,7.2173288],[-9.0516006,7.2170431],[-9.0516083,7.2165373],[-9.0518203,7.2160673],[-9.0516218,7.2156662],[-9.0512688,7.2153031],[-9.0507333,7.2151761],[-9.050239,7.2154199],[-9.0488311,7.2163463],[-9.048185,7.2169119],[-9.0477045,7.2177234],[-9.0472009,7.2186711],[-9.0466644,7.2196045],[-9.046229,7.2200839],[-9.045808,7.2202339],[-9.0451187,7.2201221],[-9.044144,7.2202139],[-9.0434892,7.2205298],[-9.0432155,7.220935],[-9.0430647,7.22146],[-9.0428349,7.2222085],[-9.0424542,7.2227005],[-9.042054,7.2229819],[-9.040691,7.2236509],[-9.0404878,7.223858],[-9.0403247,7.2242357],[-9.0403955,7.2245576],[-9.0405417,7.2249204],[-9.0409286,7.2256332],[-9.0416804,7.226368],[-9.0426971,7.2269691],[-9.0431684,7.2271259],[-9.0436028,7.2272188],[-9.0439485,7.2276275],[-9.0441533,7.2282194],[-9.0442108,7.2286524],[-9.0440928,7.2291145],[-9.043807,7.2292369],[-9.0433591,7.2295223],[-9.0430529,7.2297466],[-9.0427907,7.230063],[-9.0422407,7.2303553],[-9.0415154,7.2305157],[-9.0411017,7.2307316],[-9.041047,7.23098],[-9.0412611,7.2312436],[-9.042155,7.2316029],[-9.042626,7.2315699],[-9.043753,7.2313209],[-9.04419,7.2313549],[-9.0445443,7.2315493],[-9.0448378,7.2320235],[-9.0448282,7.23263],[-9.0444513,7.2330866],[-9.0440019,7.2334362],[-9.043277,7.2337229],[-9.0425771,7.233882],[-9.042117,7.2339049],[-9.0414905,7.2336048],[-9.040927,7.233174],[-9.0406354,7.2330162],[-9.0394631,7.2335243],[-9.0388461,7.2337832],[-9.038183,7.2337789],[-9.0369596,7.2334896],[-9.03578,7.2334719],[-9.034519,7.2336369],[-9.0339906,7.2338709],[-9.0332263,7.2344275],[-9.0328773,7.2349622],[-9.0328564,7.2351104],[-9.0329061,7.2352774],[-9.0331189,7.23543],[-9.0335974,7.2358958],[-9.0337917,7.2360542],[-9.0339509,7.2363907],[-9.0341144,7.2372834],[-9.0342336,7.2381618],[-9.0343931,7.239068],[-9.0342204,7.2395073],[-9.0340121,7.2400129],[-9.0336234,7.2404637],[-9.0318678,7.2419285],[-9.031037,7.2424286],[-9.0308414,7.2424518],[-9.030641,7.2421776],[-9.0303472,7.2417692],[-9.0299245,7.2414864],[-9.0294392,7.2413421],[-9.0286568,7.2413753],[-9.0281894,7.241505],[-9.0277415,7.241876],[-9.0275251,7.2422552],[-9.0274083,7.2425105],[-9.0274723,7.2427529],[-9.0276287,7.2430985],[-9.0278601,7.2439862],[-9.0276695,7.2444642],[-9.0274784,7.2447987],[-9.0271409,7.2454228],[-9.0265958,7.2460147],[-9.0257563,7.2467371],[-9.0252362,7.2470001],[-9.024792,7.2471099],[-9.024588,7.2470126],[-9.0243047,7.2467712],[-9.023875,7.2459554],[-9.0235414,7.2451124],[-9.0228306,7.2440685],[-9.02262,7.2439287],[-9.0223104,7.2438991],[-9.021949,7.24384],[-9.0214668,7.2438856],[-9.0207338,7.2441985],[-9.0202216,7.2446869],[-9.0196537,7.2454472],[-9.0193757,7.2459791],[-9.0194353,7.2468221],[-9.019471,7.2472712],[-9.0197967,7.2479133],[-9.0200548,7.2483387],[-9.0199595,7.2485713],[-9.0196577,7.2487208],[-9.0193718,7.2486381],[-9.0190382,7.2484057],[-9.0187404,7.2481142],[-9.0184068,7.2477557],[-9.0179978,7.247669],[-9.017684,7.2480275],[-9.0175721,7.2482255],[-9.0171281,7.2486736],[-9.016866,7.2486893],[-9.0164689,7.2485081],[-9.0162233,7.2481946],[-9.0158317,7.2474565],[-9.0153023,7.2468711],[-9.0151664,7.2462233],[-9.0152235,7.2454954],[-9.0150488,7.2448966],[-9.0149932,7.2444081],[-9.0145921,7.2440969],[-9.0140759,7.2440024],[-9.0133134,7.2439551],[-9.0125861,7.2438409],[-9.0116792,7.2435179],[-9.0113759,7.2435568],[-9.0111204,7.2439133],[-9.0106908,7.2445345],[-9.0101011,7.2449384],[-9.0093401,7.2452977],[-9.0085033,7.2456293],[-9.0083068,7.2458548],[-9.0070095,7.2459096],[-9.0058173,7.2463044],[-9.0039179,7.2468984],[-9.0032341,7.2470657],[-9.0020096,7.2476111],[-9.0012363,7.2481641],[-8.9996694,7.2494733],[-8.9993493,7.2498939],[-8.9989534,7.2504036],[-8.9987007,7.2509607],[-8.9984339,7.2515875],[-8.9980352,7.2520805],[-8.9977151,7.2524454],[-8.9975017,7.2526153],[-8.9972124,7.2526599],[-8.9967716,7.2523479],[-8.9965189,7.2522031],[-8.9961111,7.2520205],[-8.9953854,7.2520057],[-8.9948233,7.2521147],[-8.9940506,7.2526683],[-8.9936098,7.2531919],[-8.9924248,7.2543117],[-8.991574,7.2548048],[-8.9912623,7.2548633],[-8.9907906,7.2548605],[-8.9903778,7.2547435],[-8.9900291,7.2544716],[-8.9894676,7.2537172],[-8.988578,7.2528774],[-8.9873933,7.2519132],[-8.9869704,7.2515009],[-8.9868009,7.2511842],[-8.9868283,7.2508319],[-8.9868017,7.2501274],[-8.9867734,7.2496293],[-8.9865916,7.2492359],[-8.9860026,7.2481574],[-8.9854044,7.2483517],[-8.9844703,7.2495446],[-8.9839018,7.2503711],[-8.9838177,7.2510864],[-8.9838142,7.2516344],[-8.9836536,7.2530522],[-8.9833847,7.2537209],[-8.9830223,7.2540147],[-8.9828212,7.2540324],[-8.9819428,7.2540689],[-8.9793046,7.2543824],[-8.9780683,7.2543792],[-8.9770005,7.2542942],[-8.9762329,7.2540622],[-8.9756504,7.2538301],[-8.9753816,7.2534938],[-8.9753075,7.2530222],[-8.9753231,7.2527555],[-8.9753426,7.2525121],[-8.9751994,7.2524018],[-8.9749646,7.2524269],[-8.9747892,7.2524656],[-8.9746334,7.2527092],[-8.9743577,7.2528687],[-8.9742047,7.2530068],[-8.9738696,7.2532812],[-8.9733591,7.2534629],[-8.9725525,7.2536021],[-8.9719601,7.2535364],[-8.9713405,7.2531691],[-8.9707755,7.2529913],[-8.9702845,7.2530029],[-8.9698714,7.2531382],[-8.9696532,7.2533261],[-8.9696078,7.2536292],[-8.9694013,7.2539303],[-8.968883,7.2542581],[-8.9684142,7.2544609],[-8.9680322,7.2548501],[-8.96777,7.255227],[-8.9676667,7.2555569],[-8.9678071,7.2557247],[-8.9681272,7.2559828],[-8.9683812,7.2562717],[-8.968824,7.2565073],[-8.9690833,7.2569948],[-8.968916,7.2575294],[-8.9686662,7.2579432],[-8.96828,7.2583037],[-8.9678691,7.2585249],[-8.9673116,7.2586273],[-8.9663534,7.2585413],[-8.9658909,7.2583139],[-8.9655997,7.2580621],[-8.9652363,7.2578327],[-8.9648419,7.2573368],[-8.9645879,7.2571033],[-8.9643711,7.2570419],[-8.9642348,7.2570502],[-8.9641708,7.2572016],[-8.9641543,7.2573962],[-8.9641233,7.2578654],[-8.9641728,7.2591313],[-8.9641295,7.2595942],[-8.964051,7.260094],[-8.9639189,7.2604053],[-8.9637351,7.2605917],[-8.9635265,7.2606696],[-8.9632808,7.2606839],[-8.9628224,7.2604422],[-8.962492,7.2602906],[-8.9621409,7.2604914],[-8.9617878,7.2608007],[-8.9614802,7.2611509],[-8.9612861,7.2614664],[-8.9607099,7.2620522],[-8.9605158,7.262292],[-8.9605509,7.2624476],[-8.9605365,7.2627138],[-8.9606624,7.2631051],[-8.9609581,7.2634117],[-8.9611774,7.2635249],[-8.9614836,7.2636684],[-8.9619255,7.2637645],[-8.9621114,7.2639161],[-8.9629621,7.2645388],[-8.9634123,7.2647847],[-8.9640689,7.2649894],[-8.9653161,7.2653622],[-8.9658778,7.2654607],[-8.9664519,7.2654443],[-8.9670466,7.2655302],[-8.9675587,7.2656408],[-8.9677321,7.2659727],[-8.9674224,7.2666568],[-8.9672572,7.2670747],[-8.9665675,7.267337],[-8.966043,7.2675827],[-8.9655763,7.2678653],[-8.9651096,7.2681972],[-8.9646678,7.2686314],[-8.9641185,7.2692254],[-8.9631727,7.2706389],[-8.9626524,7.2716712],[-8.9623757,7.2720521],[-8.9619792,7.2725233],[-8.9613102,7.2731337],[-8.9604842,7.2733836],[-8.9599349,7.2737359],[-8.9594682,7.2741537],[-8.9587868,7.2744692],[-8.957808,7.274674],[-8.9562676,7.2742684],[-8.9544654,7.2730758],[-8.9531351,7.2724757],[-8.9524903,7.2724772],[-8.9520236,7.2724373],[-8.9515926,7.2725355],[-8.9510639,7.2726789],[-8.9502132,7.2729206],[-8.9500284,7.273062],[-8.949827,7.2729703],[-8.9497821,7.2727578],[-8.9497336,7.2723451],[-8.9496098,7.2704711],[-8.949771,7.2700444],[-8.9499943,7.2696761],[-8.9503082,7.269377],[-8.9509648,7.2691025],[-8.9517773,7.2687383],[-8.9521625,7.2686847],[-8.952307,7.2685618],[-8.952479,7.2683446],[-8.9524956,7.267641],[-8.9523272,7.2671535],[-8.9515719,7.2672099],[-8.9507625,7.2673696],[-8.9500433,7.2673438],[-8.9496433,7.2675704],[-8.9494811,7.2682023],[-8.9491697,7.2698],[-8.9490857,7.2703956],[-8.9487925,7.2706839],[-8.9473966,7.2707208],[-8.9464426,7.2708805],[-8.9459894,7.2709004],[-8.9457901,7.2707658],[-8.9458314,7.270479],[-8.9462196,7.2692828],[-8.9465639,7.2684435],[-8.9472108,7.2670296],[-8.9474751,7.2666978],[-8.9478798,7.2664438],[-8.9484952,7.2660546],[-8.9497672,7.2651083],[-8.9505477,7.2646453],[-8.9513076,7.2643012],[-8.9517743,7.2639939],[-8.9518858,7.2637195],[-8.951894,7.2635023],[-8.9517949,7.2632975],[-8.9514893,7.2632197],[-8.9509813,7.2631418],[-8.950556,7.262982],[-8.9499819,7.2628878],[-8.9495359,7.262896],[-8.9492427,7.2630804],[-8.9487677,7.2638408],[-8.9484568,7.2644061],[-8.9479376,7.2650222],[-8.9474709,7.2654811],[-8.9469919,7.265735],[-8.9464137,7.2658375],[-8.9458314,7.2658252],[-8.9451128,7.2656408],[-8.9442992,7.2651902],[-8.9438821,7.2652393],[-8.9436095,7.2654524],[-8.9434402,7.2657637],[-8.9432456,7.2664832],[-8.9433116,7.2671367],[-8.9435341,7.2680606],[-8.9435558,7.2695941],[-8.9436188,7.2724838],[-8.9437706,7.2732115],[-8.9440018,7.2735884],[-8.9447298,7.2748148],[-8.9452501,7.276183],[-8.9456021,7.277283],[-8.9455051,7.277599],[-8.9453317,7.2777956],[-8.9451169,7.2779636],[-8.9447824,7.2779759],[-8.9446466,7.277745],[-8.9443859,7.2773368],[-8.9439027,7.2765912],[-8.9436012,7.2761693],[-8.9431991,7.2756756],[-8.942542,7.2753556],[-8.9418873,7.2752188],[-8.9414454,7.2750514],[-8.940827,7.2750893],[-8.9400909,7.275227],[-8.9392112,7.2756244],[-8.9386041,7.2761283],[-8.9379309,7.2766609],[-8.9375592,7.2770951],[-8.9374002,7.2775201],[-8.9374683,7.2780209],[-8.9374493,7.2786579],[-8.9376036,7.2789483],[-8.9385174,7.2798398],[-8.9389536,7.2804128],[-8.9394868,7.2811835],[-8.9400795,7.28177],[-8.9406383,7.2821976],[-8.9416041,7.2821921],[-8.9422551,7.2823477],[-8.9427085,7.2826081],[-8.9440968,7.2835841],[-8.9444974,7.2837807],[-8.9448072,7.2841166],[-8.9447948,7.2844034],[-8.9446378,7.2846983],[-8.9441505,7.2852964],[-8.9441381,7.285661],[-8.9442249,7.2859396],[-8.9444107,7.2866278],[-8.9444685,7.2870252],[-8.9445305,7.2875741],[-8.9444273,7.2885569],[-8.9441421,7.2888117],[-8.943885,7.2889609],[-8.942926,7.2891829],[-8.942389,7.2893939],[-8.9417521,7.2897438],[-8.9411661,7.2903243],[-8.9408553,7.2905685],[-8.940627,7.2905895],[-8.940473,7.2905009],[-8.940409,7.2902489],[-8.940503,7.2897959],[-8.9405908,7.2892809],[-8.940614,7.2885201],[-8.940491,7.2879869],[-8.940353,7.2875349],[-8.9402069,7.2871239],[-8.9397926,7.2870171],[-8.9393894,7.2870071],[-8.9387032,7.287171],[-8.9380188,7.2874112],[-8.9371693,7.2877203],[-8.9365047,7.2879477],[-8.9360191,7.2879679],[-8.935759,7.2878559],[-8.935516,7.2874249],[-8.935252,7.2870879],[-8.9349517,7.2866244],[-8.9343347,7.286275],[-8.9338218,7.2861352],[-8.9324349,7.2856881],[-8.9317911,7.2856184],[-8.9310405,7.2857713],[-8.930783,7.2860309],[-8.930646,7.2863049],[-8.930216,7.2877879],[-8.929911,7.2885569],[-8.9292998,7.2891828],[-8.928858,7.289717],[-8.9285103,7.2898573],[-8.9281806,7.2898767],[-8.927899,7.2896839],[-8.927341,7.2894429],[-8.92675,7.2893069],[-8.926234,7.2892969],[-8.925612,7.2895289],[-8.9248204,7.2898111],[-8.9244098,7.2902713],[-8.9239189,7.2910433],[-8.9236294,7.291134],[-8.9233333,7.2911342],[-8.9231289,7.2909578],[-8.922968,7.2904259],[-8.9228594,7.2901637],[-8.9226941,7.2899204],[-8.9223647,7.2899071],[-8.9221537,7.2900666],[-8.9214436,7.2908722],[-8.921104,7.2910179],[-8.920672,7.2910079],[-8.9203753,7.2908033],[-8.9200395,7.2906476],[-8.9194962,7.290611],[-8.9183313,7.290824],[-8.918206,7.2910839],[-8.91828,7.2912629],[-8.9187614,7.2918273],[-8.918713,7.2920619],[-8.918671,7.2922509],[-8.9184817,7.2923162],[-8.9179977,7.2925522],[-8.9176665,7.2931147],[-8.9176416,7.2934555],[-8.9177116,7.2936975],[-8.9179974,7.2939956],[-8.918439,7.294444],[-8.9185236,7.2946364],[-8.9184804,7.2948413],[-8.9183929,7.2951652],[-8.9180892,7.2955012],[-8.9176461,7.2956277],[-8.9172137,7.2956001],[-8.9168237,7.2955084],[-8.9165539,7.295292],[-8.9164324,7.2950644],[-8.9163473,7.2945839],[-8.9160948,7.2941855],[-8.9157834,7.2939211],[-8.9153011,7.2934971],[-8.9151019,7.2932211],[-8.9152348,7.2921884],[-8.9149625,7.2914903],[-8.9146922,7.2910605],[-8.9145732,7.2904844],[-8.9149089,7.2898072],[-8.9149874,7.2892724],[-8.9149188,7.2882808],[-8.9146493,7.2877637],[-8.914275,7.2873037],[-8.9141444,7.2866137],[-8.9142306,7.2859023],[-8.9144283,7.2851327],[-8.9142899,7.2840994],[-8.9143407,7.2834424],[-8.9144666,7.2829419],[-8.9149414,7.2821601],[-8.9152315,7.2817725],[-8.9156207,7.2814161],[-8.9164498,7.2807361],[-8.9167843,7.2803628],[-8.916805,7.2799372],[-8.9166502,7.2795081],[-8.9164746,7.2791784],[-8.916185,7.2788824],[-8.9157802,7.278695],[-8.9153182,7.27861],[-8.9148227,7.2785034],[-8.9139171,7.2783637],[-8.9132972,7.2782356],[-8.9128646,7.2781834],[-8.9124934,7.2780733],[-8.9126751,7.2778357],[-8.912942,7.2775197],[-8.9138356,7.2767911],[-8.9146079,7.2762175],[-8.9148433,7.2759553],[-8.9149259,7.2757096],[-8.9149094,7.2754842],[-8.9145558,7.2753045],[-8.9140275,7.2749097],[-8.9132327,7.2742922],[-8.9125599,7.2739483],[-8.9122037,7.2737293],[-8.9119685,7.2736669],[-8.9117459,7.2737432],[-8.9117108,7.2740555],[-8.9117722,7.2747018],[-8.9116674,7.2759472],[-8.9116427,7.2762339],[-8.9114444,7.2762831],[-8.9101508,7.2762907],[-8.9089417,7.2764838],[-8.9085742,7.276451],[-8.9083723,7.2759348],[-8.9083346,7.2755293],[-8.908489,7.2741149],[-8.9085318,7.2735301],[-8.9086572,7.2728722],[-8.9090078,7.2726862],[-8.9099122,7.2720717],[-8.9105317,7.2714246],[-8.9110459,7.2710219],[-8.911225,7.270707],[-8.911111,7.2703373],[-8.9109509,7.2698467],[-8.9107122,7.2692181],[-8.9106717,7.2687291],[-8.9106966,7.2678631],[-8.9110387,7.2673218],[-8.9112899,7.2667477],[-8.911276,7.2663147],[-8.9112561,7.2660057],[-8.9108937,7.2654489],[-8.9106965,7.2650664],[-8.9108235,7.2645273],[-8.9110884,7.2642425],[-8.9109615,7.2640317],[-8.9108014,7.2639113],[-8.910553,7.2638702],[-8.910037,7.2639687],[-8.909176,7.2643],[-8.9080115,7.2641604],[-8.9064689,7.2641576],[-8.9055592,7.2641692],[-8.9053717,7.2640639],[-8.9052733,7.2637469],[-8.9052535,7.2634154],[-8.9054415,7.2630828],[-8.9059937,7.2623245],[-8.9061734,7.2618868],[-8.9062752,7.2608423],[-8.9062481,7.2601807],[-8.9059909,7.2595683],[-8.9056498,7.2591624],[-8.9056481,7.2585453],[-8.9057674,7.2578603],[-8.9055344,7.2566823],[-8.9054748,7.2563199],[-8.9054319,7.2560776],[-8.9050853,7.2558932],[-8.9046205,7.2561216],[-8.9042231,7.2564173],[-8.9035001,7.2569374],[-8.9025949,7.2574958],[-8.902032,7.2576656],[-8.9011213,7.2580597],[-8.9006847,7.2584982],[-8.9007048,7.2587962],[-8.9008975,7.2598034],[-8.9006375,7.2604333],[-8.9002758,7.2605766],[-8.8997608,7.2606958],[-8.8993393,7.2608041],[-8.8992066,7.2609242],[-8.8987968,7.2611874],[-8.8985666,7.2613655],[-8.8982036,7.2616558],[-8.8979734,7.2618997],[-8.8976885,7.2620585],[-8.8972514,7.2622172],[-8.8971576,7.2627592],[-8.8970362,7.2633477],[-8.8966487,7.2636653],[-8.8961433,7.2640679],[-8.8959657,7.2646873],[-8.8958526,7.2650609],[-8.8956769,7.2653861],[-8.8954955,7.2653996],[-8.8952906,7.2654422],[-8.8951302,7.2653508],[-8.8948204,7.2650541],[-8.8943071,7.2649776],[-8.8940183,7.2649951],[-8.893511,7.2651518],[-8.8932863,7.265182],[-8.8929202,7.2650685],[-8.8926627,7.2647953],[-8.8923683,7.2644991],[-8.892036,7.2642516],[-8.8915129,7.2641782],[-8.8910836,7.2642421],[-8.8905021,7.2642866],[-8.8901489,7.2641589],[-8.8896138,7.2639651],[-8.8889391,7.2637679],[-8.8881969,7.2637836],[-8.887608,7.2635993],[-8.8872812,7.2634298],[-8.8870217,7.2630048],[-8.8866024,7.2627509],[-8.8861498,7.2626332],[-8.8856889,7.262625],[-8.8851701,7.2623951],[-8.8843754,7.2616724],[-8.8837904,7.2611413],[-8.8831722,7.2606158],[-8.8823554,7.2603256],[-8.8817483,7.2600628],[-8.8806831,7.2594222],[-8.8796897,7.2590773],[-8.878641,7.2589897],[-8.8775483,7.259026],[-8.8767545,7.2589975],[-8.8761089,7.2587698],[-8.8753916,7.2583714],[-8.8745691,7.2580203],[-8.8737275,7.2576883],[-8.8733688,7.2575982],[-8.8725798,7.2574132],[-8.8721255,7.2572044],[-8.8720251,7.2564549],[-8.8719342,7.2560043],[-8.871676,7.2559331],[-8.8714656,7.2560707],[-8.8713556,7.256436],[-8.871236,7.2571617],[-8.871083,7.2577689],[-8.8708296,7.2583239],[-8.8705857,7.2590972],[-8.8703562,7.2599605],[-8.8700836,7.2604301],[-8.869548,7.2606246],[-8.8688785,7.2604728],[-8.8683429,7.2600459],[-8.8676926,7.2595336],[-8.8666884,7.2587936],[-8.8661623,7.2587366],[-8.8651817,7.2586595],[-8.8644345,7.2587467],[-8.8640828,7.2589882],[-8.8633457,7.2597463],[-8.863021,7.260558],[-8.8626829,7.2614268],[-8.8624631,7.2617555],[-8.8621588,7.2620238],[-8.8613371,7.2625236],[-8.8610294,7.262745],[-8.8609821,7.2631844],[-8.8610801,7.2638251],[-8.8612796,7.2642376],[-8.8616854,7.2647542],[-8.8621858,7.2653445],[-8.8625274,7.2657537],[-8.8626322,7.2661999],[-8.8624327,7.2665487],[-8.8619289,7.2666829],[-8.8610768,7.266817],[-8.8600218,7.2671558],[-8.8589702,7.267508],[-8.8581282,7.2678535],[-8.8576988,7.2677931],[-8.8574756,7.2676153],[-8.8573403,7.2669915],[-8.8571104,7.2663508],[-8.8567756,7.2659416],[-8.8563158,7.2653378],[-8.8558255,7.2647106],[-8.8553791,7.2639961],[-8.8547941,7.2633789],[-8.8543005,7.262963],[-8.8539928,7.2627718],[-8.8534281,7.2626745],[-8.853073,7.2628959],[-8.8524069,7.2633957],[-8.8521127,7.2637412],[-8.8516393,7.2645194],[-8.8510746,7.265103],[-8.8505066,7.2654485],[-8.8501211,7.2655525],[-8.8495124,7.2655558],[-8.8482748,7.2658745],[-8.8472867,7.2663681],[-8.8468587,7.2664298],[-8.8465407,7.2666219],[-8.8463423,7.2668496],[-8.8459764,7.2672149],[-8.8456441,7.2674568],[-8.845393,7.2676157],[-8.8452974,7.2677129],[-8.8450463,7.2679857],[-8.8451109,7.2681114],[-8.8454504,7.2686],[-8.8457588,7.269136],[-8.8459382,7.2696459],[-8.8461438,7.2703527],[-8.8463303,7.2707868],[-8.8465598,7.2711496],[-8.8470333,7.2714058],[-8.8475425,7.2713607],[-8.8479657,7.2710121],[-8.8481235,7.2705543],[-8.8482407,7.270227],[-8.8484894,7.2696483],[-8.848738,7.2692688],[-8.849178,7.2691834],[-8.8494912,7.2695297],[-8.8494697,7.2699519],[-8.8493214,7.2702934],[-8.8489341,7.2708081],[-8.8485181,7.2713536],[-8.8481283,7.2718422],[-8.8475401,7.2721932],[-8.8469257,7.2722098],[-8.8461223,7.2721221],[-8.8454552,7.2719608],[-8.8447068,7.2719632],[-8.8441449,7.2720841],[-8.8433416,7.2721766],[-8.8428705,7.2723165],[-8.8422991,7.2725751],[-8.8415005,7.2732605],[-8.8409147,7.2737799],[-8.8404389,7.274361],[-8.8399535,7.2748614],[-8.8394657,7.2753595],[-8.8391358,7.2755018],[-8.83888,7.2756963],[-8.8380527,7.2758339],[-8.8376486,7.2760971],[-8.8372852,7.2764553],[-8.8371321,7.2769415],[-8.8371728,7.2774917],[-8.8372134,7.2779495],[-8.8373258,7.2782981],[-8.837448,7.2785049],[-8.8376821,7.2789195],[-8.8379331,7.2795267],[-8.8379475,7.2801623],[-8.8378375,7.280703],[-8.8377753,7.2814098],[-8.8380837,7.2823229],[-8.8381435,7.2829206],[-8.8380129,7.2835969],[-8.8378269,7.2839793],[-8.8373806,7.2847105],[-8.8370695,7.2852874],[-8.8367084,7.2861673],[-8.8363665,7.2869357],[-8.8361609,7.287384],[-8.8360533,7.2876875],[-8.8363617,7.2880978],[-8.8364885,7.2883967],[-8.8364717,7.2889611],[-8.8364287,7.289388],[-8.8365698,7.2897058],[-8.8365482,7.2898932],[-8.8367371,7.2903912],[-8.8366702,7.2909676],[-8.8365411,7.2912854],[-8.8362781,7.2916506],[-8.8363378,7.2919328],[-8.8365124,7.2921605],[-8.8369571,7.2921724],[-8.8372201,7.2921036],[-8.8377437,7.2916174],[-8.8382769,7.2911383],[-8.8387121,7.2908395],[-8.8392477,7.2907755],[-8.8396757,7.2910008],[-8.8397952,7.2914609],[-8.8398143,7.2919376],[-8.8397067,7.2925115],[-8.8394916,7.2930428],[-8.8392859,7.2935052],[-8.8389225,7.2948832],[-8.8387934,7.2955211],[-8.8387719,7.2960121],[-8.8389584,7.296382],[-8.8393098,7.2966477],[-8.8398048,7.2968872],[-8.8399674,7.2972026],[-8.8403475,7.2975607],[-8.8406153,7.2978619],[-8.840864,7.2980374],[-8.841029,7.2982746],[-8.8411653,7.2983078],[-8.8415885,7.298628],[-8.8419089,7.2990169],[-8.8423942,7.2994723],[-8.8428294,7.2999679],[-8.84298,7.3002834],[-8.843047,7.3007174],[-8.8429322,7.3012794],[-8.8428007,7.30173],[-8.8426907,7.3019079],[-8.8424827,7.3024368],[-8.8423512,7.3027404],[-8.8423727,7.302968],[-8.8425209,7.3031672],[-8.8429274,7.3034234],[-8.8433076,7.3036131],[-8.8437547,7.303568],[-8.8441946,7.3033997],[-8.8445653,7.3033617],[-8.8449478,7.303606],[-8.8451176,7.3040827],[-8.8451152,7.3043341],[-8.8450339,7.3048036],[-8.8450387,7.3052234],[-8.8452036,7.3056218],[-8.8455049,7.305712],[-8.8456412,7.3058637],[-8.8455408,7.3062171],[-8.8452562,7.306459],[-8.8448928,7.3065847],[-8.8445437,7.3065373],[-8.8442783,7.3062788],[-8.8440655,7.3059088],[-8.8439149,7.3055199],[-8.8436328,7.3051878],[-8.843243,7.3049744],[-8.8427577,7.3046945],[-8.842148,7.3042582],[-8.8416267,7.304002],[-8.8411055,7.3039997],[-8.8403834,7.3040068],[-8.8391975,7.30404],[-8.8385638,7.3043317],[-8.8384873,7.304538],[-8.8381789,7.3048606],[-8.8379541,7.3053088],[-8.8379326,7.3055863],[-8.8381132,7.3057867],[-8.838173,7.3061803],[-8.838338,7.3064483],[-8.8385599,7.3067857],[-8.838871,7.3070943],[-8.8393714,7.3071077],[-8.8397907,7.307054],[-8.8404535,7.307054],[-8.8411838,7.306893],[-8.8416366,7.3067761],[-8.8420258,7.3068998],[-8.8422118,7.3074968],[-8.8421374,7.3079529],[-8.841877,7.3086539],[-8.8414003,7.3093347],[-8.841008,7.3096164],[-8.8403858,7.3097372],[-8.8396014,7.3097908],[-8.8389745,7.3099784],[-8.8384116,7.3101981],[-8.8377429,7.3106736],[-8.837173,7.3108361],[-8.8368365,7.3110641],[-8.8365001,7.3113207],[-8.8363124,7.3117249],[-8.8362769,7.3122179],[-8.8363697,7.3127833],[-8.8366489,7.3134823],[-8.8367875,7.3136265],[-8.8369411,7.3140025],[-8.8371475,7.3145882],[-8.8372388,7.3150168],[-8.8374788,7.3153597],[-8.8376853,7.3157835],[-8.8379733,7.3161264],[-8.8382134,7.3163216],[-8.8386215,7.3165788],[-8.839217,7.3166685],[-8.8398274,7.3165192],[-8.8402821,7.3164991],[-8.8405729,7.3165762],[-8.8409956,7.3166098],[-8.8416161,7.3165511],[-8.8421233,7.3163565],[-8.8426863,7.3160782],[-8.8431952,7.3158853],[-8.8435418,7.315991],[-8.8438174,7.3162693],[-8.8441302,7.3166014],[-8.8443094,7.3169871],[-8.8445156,7.3172353],[-8.84459,7.3175673],[-8.8443973,7.3178758],[-8.8440374,7.318198],[-8.8434065,7.3184862],[-8.8429433,7.3185869],[-8.8425511,7.3187478],[-8.8425874,7.318998],[-8.8426162,7.3192313],[-8.8428419,7.3195171],[-8.8432442,7.3197674],[-8.8441741,7.3198613],[-8.8447185,7.3198144],[-8.8450296,7.3197808],[-8.8453779,7.3196299],[-8.8456957,7.3194186],[-8.846301,7.3191268],[-8.8468116,7.3188652],[-8.8474101,7.3186506],[-8.8478903,7.3186875],[-8.8481777,7.3188786],[-8.8482926,7.3190396],[-8.8483163,7.3191369],[-8.8483129,7.3192811],[-8.8483153,7.3194075],[-8.8481811,7.3195863],[-8.8479264,7.3198314],[-8.8475014,7.3200223],[-8.8468488,7.3204616],[-8.846257,7.3209748],[-8.8459426,7.3213403],[-8.8456619,7.3217696],[-8.8453204,7.3220916],[-8.8450533,7.3223968],[-8.8449208,7.3227172],[-8.8448318,7.3230408],[-8.8448152,7.3233792],[-8.8448584,7.3239697],[-8.844988,7.3247126],[-8.8450364,7.3254184],[-8.8451032,7.3259727],[-8.8452097,7.3266136],[-8.8452492,7.32721],[-8.8448595,7.3279523],[-8.8443049,7.3284252],[-8.8436033,7.328779],[-8.8429118,7.3293642],[-8.8429422,7.3304475],[-8.8431316,7.3311786],[-8.8431519,7.3320975],[-8.8433142,7.3325939],[-8.8432143,7.3330779],[-8.8431019,7.3336351],[-8.8433219,7.3343323],[-8.8433577,7.3345647],[-8.8438742,7.3345671],[-8.8443595,7.3347141],[-8.8449525,7.3346809],[-8.8456029,7.3351102],[-8.8466071,7.3353236],[-8.8473501,7.3357987],[-8.8480387,7.3360922],[-8.8484752,7.3363755],[-8.8487998,7.336892],[-8.8488539,7.3372508],[-8.8471801,7.3375728],[-8.8471158,7.3379082],[-8.8471767,7.3382737],[-8.8473965,7.3386426],[-8.8481573,7.338817],[-8.8481776,7.3391524],[-8.847853,7.3392932],[-8.847596,7.3395414],[-8.84741,7.3400176],[-8.8471429,7.3406413],[-8.8467946,7.3408862],[-8.8466965,7.3411142],[-8.8472173,7.3413154],[-8.848022,7.3412316],[-8.8483061,7.3413523],[-8.8489233,7.3414167],[-8.8492844,7.3415447],[-8.8498343,7.3423297],[-8.850138,7.342287],[-8.8504894,7.3423108],[-8.8508129,7.3424999],[-8.8509605,7.3431312],[-8.8510513,7.3436552],[-8.8509437,7.3443524],[-8.8506042,7.3450378],[-8.8504034,7.3454339],[-8.850664,7.3456426],[-8.8510728,7.3454907],[-8.8518547,7.3450781],[-8.8519789,7.3453288],[-8.852407,7.3457895],[-8.8522205,7.3463728],[-8.8519495,7.3468293],[-8.8522997,7.3469718],[-8.8532553,7.3467644],[-8.8533634,7.3472455],[-8.8535212,7.3479],[-8.8536109,7.3485721],[-8.8535972,7.3489437],[-8.8527704,7.3496359],[-8.8521273,7.3498992],[-8.8517136,7.35039],[-8.8514411,7.3508003],[-8.8509791,7.3512795],[-8.8503789,7.3518131],[-8.8500662,7.352268],[-8.8495899,7.352885],[-8.8494565,7.353193],[-8.8492289,7.3534589],[-8.8492026,7.3535822],[-8.8490758,7.3537315],[-8.848948,7.3539383],[-8.8488076,7.3540004],[-8.8483173,7.354433],[-8.8475041,7.3554222],[-8.8471547,7.3558965],[-8.846333,7.3568556],[-8.8460321,7.3570434],[-8.8457988,7.3570703],[-8.8455722,7.3570837],[-8.8452386,7.3568827],[-8.8449005,7.3566145],[-8.8444372,7.3564401],[-8.8439401,7.3563058],[-8.8435783,7.356383],[-8.8431895,7.3566077],[-8.8429866,7.3570349],[-8.8427398,7.3577613],[-8.8420567,7.3597667],[-8.8418881,7.3602967],[-8.8414779,7.3614256],[-8.8407312,7.3628787],[-8.8403188,7.3633615],[-8.8399225,7.3637067],[-8.8389649,7.3642539],[-8.8383034,7.3646762],[-8.8380092,7.364978],[-8.8378097,7.3655112],[-8.8376608,7.3664995],[-8.8375281,7.3675351],[-8.8373929,7.3680918],[-8.8371004,7.3681488],[-8.8365965,7.3684539],[-8.8361857,7.3688563],[-8.8359163,7.3693543],[-8.8353743,7.3697641],[-8.8342793,7.3703759],[-8.8333659,7.3712295],[-8.8322087,7.3727945],[-8.8318387,7.3734995],[-8.8314745,7.3743236],[-8.8312403,7.3751877],[-8.8311441,7.3757801],[-8.8309662,7.3765996],[-8.8309459,7.3772837],[-8.8308534,7.3778407],[-8.8305312,7.3782537],[-8.8302392,7.3783836],[-8.8293634,7.3785379],[-8.8287379,7.3789235],[-8.8280447,7.3793427],[-8.8279703,7.3798222],[-8.8282617,7.3805717],[-8.8285012,7.3809053],[-8.8285216,7.3814173],[-8.8282205,7.3822501],[-8.8280041,7.3823709],[-8.8278587,7.3828638],[-8.8278148,7.3833332],[-8.8275544,7.3834975],[-8.8266752,7.3836853],[-8.8259449,7.3837456],[-8.825113,7.3839804],[-8.8248527,7.3844867],[-8.8247411,7.3855866],[-8.8242846,7.3872365],[-8.8237571,7.3882525],[-8.8235103,7.3893826],[-8.8231113,7.390241],[-8.8227354,7.3908932],[-8.8222829,7.3913954],[-8.8218371,7.3917306],[-8.8214664,7.3918912],[-8.821008,7.3920954],[-8.8204839,7.3922932],[-8.8193174,7.392823],[-8.8189183,7.3933562],[-8.8181677,7.3939263],[-8.8178397,7.3943018],[-8.8176875,7.3948116],[-8.8173257,7.3953146],[-8.8172035,7.3958518],[-8.8171054,7.3965191],[-8.8169803,7.3975217],[-8.8169402,7.3984298],[-8.8168354,7.3994458],[-8.8169397,7.4003485],[-8.8168011,7.4008716],[-8.8168991,7.4012304],[-8.8168484,7.4016059],[-8.816277,7.4020486],[-8.8159422,7.4025348],[-8.8155398,7.4030813],[-8.8153065,7.4035743],[-8.8152096,7.4040356],[-8.8153538,7.4043354],[-8.8156582,7.4047043],[-8.8157934,7.4050128],[-8.8158552,7.4055914],[-8.8157457,7.4061121],[-8.8155712,7.4064024],[-8.8146491,7.4072603],[-8.8143758,7.4078647],[-8.8142039,7.4079949],[-8.8140803,7.4079581],[-8.8137994,7.4078648],[-8.8134355,7.4079655],[-8.8131141,7.4080003],[-8.812967,7.4080386],[-8.8128185,7.4080772],[-8.8125119,7.4079345],[-8.8121853,7.4079189],[-8.8118117,7.4078982],[-8.8113205,7.4074085],[-8.8110534,7.4072332],[-8.8106086,7.406941],[-8.8101423,7.4064371],[-8.8097244,7.4063827],[-8.8094404,7.4064869],[-8.809119,7.4064027],[-8.8090119,7.4061096],[-8.8091117,7.4059081],[-8.8093371,7.4056589],[-8.8097509,7.4055124],[-8.809935,7.4053724],[-8.8100753,7.4050206],[-8.8101093,7.404721],[-8.8100611,7.4044306],[-8.8098923,7.4042072],[-8.80953,7.4041814],[-8.8092367,7.4042915],[-8.8086816,7.4048368],[-8.8074323,7.4052012],[-8.80648,7.4055704],[-8.8059754,7.4059187],[-8.8057556,7.4059991],[-8.8051114,7.4061264],[-8.8045385,7.4063533],[-8.8039691,7.4066757],[-8.8034855,7.406925],[-8.8031883,7.4073684],[-8.8029657,7.4075323],[-8.8020703,7.4078245],[-8.8018247,7.4079527],[-8.8012978,7.408163],[-8.8009693,7.4081873],[-8.8007588,7.4083813],[-8.8004843,7.4090839],[-8.8004693,7.4098878],[-8.8006384,7.4108051],[-8.8005687,7.4119163],[-8.8012189,7.4126124],[-8.8015495,7.4132096],[-8.8016249,7.4135686],[-8.8019042,7.4141293],[-8.8025482,7.4149847],[-8.8027091,7.4155762],[-8.8023514,7.4160381],[-8.8018471,7.4161865],[-8.800927,7.4161425],[-8.800042,7.4158952],[-8.7987934,7.4155325],[-8.7982328,7.4152372],[-8.796958,7.4138772],[-8.796627,7.41343],[-8.7960573,7.4130208],[-8.7958978,7.4127881],[-8.7957854,7.4125416],[-8.79542,7.4125441],[-8.7949862,7.4125985],[-8.7949548,7.4130233],[-8.7947281,7.4130643],[-8.7941005,7.4134016],[-8.7929877,7.4141476],[-8.7921616,7.4146392],[-8.7915716,7.4154586],[-8.7912347,7.41614],[-8.7908482,7.4162407],[-8.790117,7.4159547],[-8.789689,7.415935],[-8.7889088,7.4157056],[-8.7885565,7.4155098],[-8.7874309,7.4153795],[-8.7872794,7.4154344],[-8.7867881,7.4153905],[-8.7865589,7.4150461],[-8.7863447,7.4144305],[-8.7857555,7.4137156],[-8.7854025,7.4137125],[-8.785118,7.413837],[-8.7847369,7.4138816],[-8.7841137,7.4148452],[-8.7836513,7.4148917],[-8.7822374,7.4140478],[-8.7816209,7.4141009],[-8.7815083,7.4138993],[-8.7815137,7.4136889],[-8.7818593,7.4133204],[-8.7821918,7.4125987],[-8.7825418,7.4121785],[-8.7824844,7.4119194],[-8.7825235,7.411593],[-8.7827222,7.4110722],[-8.7828057,7.4106836],[-8.78274,7.4104994],[-8.7823044,7.4103797],[-8.7816954,7.4108132],[-8.7811921,7.4110443],[-8.7804021,7.4113624],[-8.7799792,7.4117288],[-8.7796367,7.4121422],[-8.7795704,7.4125262],[-8.7795426,7.4128003],[-8.7796629,7.4131758],[-8.7798535,7.413707],[-8.7798509,7.4141241],[-8.7801671,7.4151214],[-8.780207,7.4162208],[-8.7801304,7.4168702],[-8.7802506,7.4172873],[-8.7802638,7.4176526],[-8.7804806,7.4180082],[-8.7808463,7.4182718],[-8.7811676,7.4183314],[-8.781373,7.4185997],[-8.7813296,7.4188858],[-8.7813662,7.4193495],[-8.7812725,7.4195964],[-8.7809508,7.4201214],[-8.7803904,7.4205908],[-8.7792219,7.4212657],[-8.7785653,7.420726],[-8.7782825,7.4206125],[-8.7778784,7.4207925],[-8.7777008,7.4212975],[-8.7777946,7.4221015],[-8.7776204,7.4232378],[-8.7780292,7.4244073],[-8.7776204,7.4258758],[-8.7777343,7.4268858],[-8.7775601,7.4280487],[-8.7773725,7.429278],[-8.7769771,7.4304142],[-8.7769168,7.432308],[-8.7775132,7.433298],[-8.77754,7.4344675],[-8.7778482,7.4353512],[-8.7783173,7.4354708],[-8.7782771,7.4360489],[-8.7778214,7.4369127],[-8.7772787,7.4376636],[-8.7764946,7.439132],[-8.7761328,7.4394975],[-8.7752683,7.4404145],[-8.7748663,7.4411852],[-8.7749802,7.4423613],[-8.7749132,7.4439693],[-8.7743503,7.4446869],[-8.7742029,7.4450989],[-8.7737186,7.4456798],[-8.7736601,7.44575],[-8.7736013,7.4457888],[-8.7729288,7.4462324],[-8.7720787,7.4467932],[-8.772072,7.4472849],[-8.773191,7.4477367],[-8.7736199,7.448255],[-8.7741279,7.4486071],[-8.7742627,7.4488105],[-8.7744142,7.4488398],[-8.7745818,7.4489827],[-8.7746747,7.4494388],[-8.7750204,7.4497367],[-8.7751562,7.4498114],[-8.7757575,7.450142],[-8.7764477,7.4500623],[-8.7767962,7.4502085],[-8.7769905,7.4505872],[-8.7769959,7.4514528],[-8.7764054,7.4519787],[-8.7763176,7.452248],[-8.7764315,7.4524268],[-8.7765491,7.4525408],[-8.7767581,7.4526289],[-8.7769279,7.45259],[-8.77721,7.4523724],[-8.7777587,7.4519683],[-8.7782734,7.4513259],[-8.7784667,7.4511445],[-8.7787462,7.4511938],[-8.7789892,7.451287],[-8.7790284,7.451559],[-8.7789552,7.4518958],[-8.7788063,7.4523362],[-8.7785947,7.4527429],[-8.7782368,7.4531573],[-8.7777206,7.453351],[-8.7770143,7.4535077],[-8.7760033,7.4538367],[-8.7756323,7.4538704],[-8.7746447,7.4538134],[-8.7743056,7.454133],[-8.7739315,7.4544947],[-8.7736729,7.4545387],[-8.7733724,7.4546035],[-8.7731007,7.4545413],[-8.7727768,7.4546864],[-8.7725678,7.4549044],[-8.7721733,7.4553159],[-8.7717082,7.4559194],[-8.7712301,7.456251],[-8.7706972,7.45658],[-8.7696051,7.4569453],[-8.7690722,7.4572432],[-8.7680768,7.4578234],[-8.7674289,7.4582457],[-8.7669795,7.4586886],[-8.7667209,7.4591342],[-8.7666869,7.4595979],[-8.766525,7.4598491],[-8.7665093,7.4608516],[-8.7664256,7.461029],[-8.766201,7.4610589],[-8.7658901,7.4608672],[-8.7656498,7.4605149],[-8.7653232,7.4600408],[-8.765109,7.4595642],[-8.7650123,7.4589036],[-8.7648268,7.4584633],[-8.7643931,7.4580462],[-8.7642886,7.4578519],[-8.7641136,7.4573157],[-8.7634709,7.4567769],[-8.7627577,7.4565282],[-8.7625016,7.4562458],[-8.7621385,7.4560775],[-8.7618354,7.4561008],[-8.761535,7.4562329],[-8.7613605,7.456408],[-8.7613919,7.4566003],[-8.7612607,7.456745],[-8.7611573,7.4574136],[-8.7610335,7.458018],[-8.7606566,7.4587636],[-8.7605994,7.4590548],[-8.760616,7.4592435],[-8.7604737,7.4595146],[-8.7603352,7.4597618],[-8.7600858,7.4600677],[-8.7595205,7.460685],[-8.7593469,7.4611484],[-8.7591529,7.4613389],[-8.7587317,7.4615606],[-8.7576436,7.4621046],[-8.7571042,7.4623793],[-8.7570284,7.4628281],[-8.7573222,7.4636597],[-8.7572501,7.4647312],[-8.7563893,7.4657167],[-8.7563264,7.4662314],[-8.7560826,7.4664036],[-8.7558461,7.4663321],[-8.7555986,7.4662149],[-8.7553732,7.465887],[-8.755327,7.4654877],[-8.7553917,7.4651544],[-8.7555062,7.4648631],[-8.7553954,7.4646488],[-8.7550666,7.4644656],[-8.754045,7.4643631],[-8.7537937,7.464484],[-8.7535868,7.4647551],[-8.753306,7.4652276],[-8.7529329,7.4655134],[-8.7525117,7.4657442],[-8.7520425,7.4661948],[-8.7519058,7.4667076],[-8.75154,7.4671436],[-8.75079,7.4675172],[-8.7503096,7.467759],[-8.7501286,7.4681583],[-8.7501027,7.468858],[-8.7499808,7.4693892],[-8.7497222,7.4703527],[-8.7496224,7.4708435],[-8.7494931,7.4713088],[-8.7494229,7.4717997],[-8.748902,7.4721843],[-8.7486433,7.4724994],[-8.7481261,7.4729646],[-8.7475312,7.4733493],[-8.7474278,7.473668],[-8.7473724,7.4741369],[-8.7472283,7.4742834],[-8.7468403,7.4744482],[-8.7463637,7.4748366],[-8.745658,7.475463],[-8.7450643,7.4755124],[-8.7448203,7.4756222],[-8.7445787,7.4758816],[-8.7443825,7.4762807],[-8.7439196,7.4775479],[-8.7437334,7.4780094],[-8.743751,7.4783187],[-8.7435699,7.4786156],[-8.7435221,7.4789423],[-8.7434013,7.4791419],[-8.7430843,7.4792965],[-8.7420604,7.4795884],[-8.741693,7.4795684],[-8.7413257,7.4794786],[-8.7408628,7.4794288],[-8.7404502,7.4794562],[-8.7404955,7.4799002],[-8.7404703,7.4803542],[-8.7403496,7.4813869],[-8.740264,7.4819756],[-8.7400401,7.4823173],[-8.7400804,7.482674],[-8.7402691,7.4837416],[-8.7401206,7.4839587],[-8.7398263,7.4840759],[-8.7394212,7.484248],[-8.7389734,7.484238],[-8.7384048,7.4840759],[-8.7376224,7.4836419],[-8.7373909,7.4831879],[-8.7371444,7.483128],[-8.736684,7.4833076],[-8.7365204,7.4836294],[-8.7363217,7.4839961],[-8.7359921,7.4845124],[-8.7357757,7.4854029],[-8.7354864,7.4864231],[-8.7355543,7.4867175],[-8.735665,7.4878724],[-8.7351644,7.4884112],[-8.7349531,7.4890872],[-8.734304,7.4900375],[-8.7339945,7.4909728],[-8.7332864,7.4914526],[-8.7329502,7.4918565],[-8.7324574,7.4924209],[-8.7317814,7.4927842],[-8.7311872,7.4934421],[-8.7306375,7.4942694],[-8.7300469,7.4958374],[-8.7296662,7.4962395],[-8.7291166,7.496565],[-8.7284672,7.4966452],[-8.7272752,7.4965729],[-8.727026,7.4968072],[-8.7269895,7.4968023],[-8.7269227,7.4973022],[-8.7270661,7.4974968],[-8.7271793,7.4981279],[-8.7272359,7.4986941],[-8.7269139,7.4991032],[-8.7266183,7.4991942],[-8.7263302,7.4989485],[-8.7260724,7.4988824],[-8.7258396,7.4991343],[-8.7256623,7.4993975],[-8.7251767,7.4997118],[-8.7246685,7.4997143],[-8.7241138,7.5000473],[-8.7239616,7.5003516],[-8.7236735,7.5005449],[-8.72351,7.5007556],[-8.7232961,7.5010537],[-8.7231024,7.5012595],[-8.7230722,7.5015289],[-8.7227024,7.5017471],[-8.7222155,7.501802],[-8.7219514,7.5020128],[-8.7219614,7.5022373],[-8.7222294,7.5024069],[-8.7222646,7.5025179],[-8.722169,7.5027586],[-8.7220281,7.5029544],[-8.7215551,7.5030043],[-8.7213325,7.5033809],[-8.7212256,7.503775],[-8.7210746,7.5041579],[-8.7208972,7.5045919],[-8.7204633,7.504905],[-8.7203261,7.5052055],[-8.7202922,7.5054213],[-8.7197337,7.5059638],[-8.7194745,7.5060099],[-8.719077,7.5061197],[-8.7188845,7.5063666],[-8.7187248,7.5065861],[-8.7186279,7.5068405],[-8.7184128,7.5070925],[-8.7182116,7.5071835],[-8.7178933,7.5072184],[-8.7175599,7.5069964],[-8.7172429,7.5073793],[-8.7171813,7.5075739],[-8.7172618,7.5077958],[-8.7173977,7.5079792],[-8.7176367,7.5082236],[-8.7176996,7.5084668],[-8.7178279,7.5086015],[-8.7183034,7.508811],[-8.71836,7.5090343],[-8.7183126,7.509283],[-8.7181416,7.50954],[-8.717931,7.5095643],[-8.7174165,7.509497],[-8.7170895,7.5095793],[-8.7169109,7.5099073],[-8.7166882,7.5099422],[-8.7163486,7.5098861],[-8.7157347,7.5097913],[-8.7153548,7.5096591],[-8.7150202,7.5097052],[-8.7149812,7.5099883],[-8.7147862,7.5102914],[-8.7145409,7.5104236],[-8.7142239,7.5104448],[-8.7140252,7.5103014],[-8.7136641,7.5102415],[-8.7132616,7.5101604],[-8.7131006,7.5103088],[-8.7129069,7.5102378],[-8.7122892,7.5103151],[-8.712103,7.5108925],[-8.7118263,7.5111918],[-8.7110996,7.511677],[-8.7108803,7.5116645],[-8.7104602,7.5115073],[-8.7102551,7.5116146],[-8.7098662,7.5114771],[-8.7097497,7.511735],[-8.7097307,7.512039],[-8.7098267,7.51221],[-8.7099165,7.5124898],[-8.7097887,7.512971],[-8.7095567,7.51348],[-8.7090087,7.514064],[-8.7084087,7.514521],[-8.7078267,7.514873],[-8.7072937,7.515083],[-8.7067407,7.515036],[-8.7063893,7.5151437],[-8.7063893,7.5155702],[-8.7066311,7.5158547],[-8.7069471,7.5163883],[-8.7070064,7.5168313],[-8.707194,7.5171593],[-8.7076927,7.5171373],[-8.7080236,7.5170761],[-8.7081421,7.5169439],[-8.7082359,7.5162366],[-8.7084013,7.5158988],[-8.7086136,7.5157519],[-8.7087988,7.5157544],[-8.7091938,7.5160065],[-8.7096283,7.5164813],[-8.7100579,7.5167799],[-8.7103591,7.5170492],[-8.7103689,7.5173502],[-8.7102159,7.5175191],[-8.7099567,7.5176709],[-8.7089839,7.5179328],[-8.7082828,7.5180209],[-8.7079223,7.5181702],[-8.7077569,7.5184198],[-8.7080218,7.5186644],[-8.7082028,7.5188544],[-8.7085395,7.5191297],[-8.7092135,7.5194943],[-8.7096777,7.5197342],[-8.7097578,7.5199924],[-8.7098406,7.5202825],[-8.7097008,7.5205534],[-8.7095221,7.5205762],[-8.7091444,7.5206716],[-8.7088555,7.5209433],[-8.7084457,7.5213741],[-8.7085198,7.5216629],[-8.7087617,7.5216311],[-8.7090037,7.5215748],[-8.7092456,7.5215063],[-8.7096357,7.5214647],[-8.7095962,7.5217926],[-8.7096357,7.5223017],[-8.7098332,7.5225685],[-8.7100949,7.5225],[-8.7105961,7.5226297],[-8.7113058,7.5236394],[-8.711675,7.5239098],[-8.7121194,7.524157],[-8.7127662,7.5244116],[-8.7129118,7.5246979],[-8.7129267,7.525092],[-8.7129464,7.5255056],[-8.7127478,7.5260034],[-8.7125668,7.5263084],[-8.7119984,7.5267784],[-8.711596,7.5271871],[-8.7115145,7.5275493],[-8.7116182,7.52775],[-8.7118527,7.5277941],[-8.7121119,7.5277574],[-8.7124181,7.5279948],[-8.7126921,7.5281808],[-8.7128738,7.5282934],[-8.7134797,7.5285333],[-8.7137784,7.5286875],[-8.713966,7.5288661],[-8.7141389,7.5290203],[-8.7144198,7.5290234],[-8.7145981,7.5289616],[-8.7149264,7.5285651],[-8.7148746,7.5281784],[-8.7153239,7.5278749],[-8.7155733,7.5277329],[-8.71583,7.5276742],[-8.7160497,7.5274686],[-8.7160568,7.5271014],[-8.7161428,7.5268454],[-8.7164201,7.5267025],[-8.716699,7.5268714],[-8.716699,7.5270353],[-8.7168916,7.5274392],[-8.7172298,7.5274424],[-8.7175557,7.5272556],[-8.7179532,7.5273437],[-8.718089,7.5275077],[-8.7180223,7.5277843],[-8.717773,7.5280217],[-8.7174743,7.5283913],[-8.7173829,7.5285969],[-8.7171657,7.5289836],[-8.7171558,7.5292039],[-8.7172101,7.5292895],[-8.7173286,7.52927],[-8.7179088,7.529128],[-8.7181186,7.5292577],[-8.7182223,7.5294535],[-8.7181952,7.5296518],[-8.7179853,7.5297766],[-8.7176989,7.5300214],[-8.7172817,7.5301805],[-8.7171286,7.5304277],[-8.7174051,7.5305109],[-8.7179705,7.5306798],[-8.7181108,7.5309854],[-8.7181298,7.5312234],[-8.7180158,7.5314414],[-8.7178638,7.5314994],[-8.717694,7.5312525],[-8.7174866,7.5311815],[-8.7172619,7.5312451],[-8.7172595,7.531999],[-8.7167336,7.5320186],[-8.7164793,7.5322364],[-8.7165509,7.532579],[-8.716388,7.5328556],[-8.7163208,7.5332304],[-8.7160695,7.53335],[-8.7158596,7.533678],[-8.715477,7.5342336],[-8.7154671,7.5347867],[-8.7154054,7.5357755],[-8.7155618,7.5369084],[-8.7154478,7.5373554],[-8.7151467,7.5375824],[-8.7147553,7.5378646],[-8.7145454,7.538115],[-8.7144743,7.5384007],[-8.7145818,7.5389714],[-8.714549,7.5392719],[-8.7141825,7.5393777],[-8.7139263,7.5394306],[-8.713567,7.5395435],[-8.7130297,7.5401185],[-8.7129016,7.540838],[-8.7126597,7.541293],[-8.7127415,7.5418009],[-8.7126028,7.542196],[-8.7122363,7.5426157],[-8.712126,7.5430601],[-8.7123288,7.5434305],[-8.7124035,7.5437373],[-8.7122221,7.5438961],[-8.7118627,7.5438008],[-8.7114536,7.5441394],[-8.7114429,7.5445204],[-8.7112721,7.5450636],[-8.7107775,7.5454022],[-8.7106085,7.5455785],[-8.7106317,7.5457902],[-8.7109021,7.5458924],[-8.7113575,7.5459383],[-8.7117133,7.5458854],[-8.7124918,7.5459774],[-8.7133252,7.5459479],[-8.7136245,7.5458082],[-8.7141126,7.5454665],[-8.7144699,7.5453219],[-8.7147995,7.545262],[-8.715051,7.5452595],[-8.7151416,7.5454067],[-8.7152221,7.5457234],[-8.7153253,7.5461973],[-8.7154098,7.5466294],[-8.7154662,7.5468732],[-8.7154611,7.5472573],[-8.7153278,7.5474094],[-8.7154259,7.5478858],[-8.7152649,7.54824],[-8.7154989,7.5484769],[-8.7153378,7.5486689],[-8.7150385,7.5495194],[-8.7147064,7.5496815],[-8.7145856,7.5498461],[-8.7144498,7.5499459],[-8.7140925,7.5497563],[-8.7137654,7.5494396],[-8.7132673,7.5490555],[-8.7128748,7.5489757],[-8.7125553,7.5490281],[-8.7124547,7.5492675],[-8.7126786,7.5495144],[-8.7128678,7.5497584],[-8.7131692,7.5502901],[-8.7131264,7.5505544],[-8.7129503,7.5507864],[-8.712666,7.5508487],[-8.712193,7.5508787],[-8.7118156,7.5511181],[-8.7115112,7.5517566],[-8.7115738,7.5519934],[-8.7116888,7.5521734],[-8.7118978,7.5523444],[-8.7126898,7.5525614],[-8.7131818,7.5525721],[-8.7137126,7.5524773],[-8.7141051,7.5524324],[-8.7141956,7.5527392],[-8.7141504,7.5529612],[-8.7141982,7.5531507],[-8.7142812,7.5533602],[-8.7143365,7.5535548],[-8.7144648,7.5537468],[-8.7145218,7.5539274],[-8.7149303,7.5540635],[-8.7151693,7.5539812],[-8.7151693,7.5537967],[-8.7152121,7.5534425],[-8.7157177,7.5532505],[-8.7161077,7.5531582],[-8.7162083,7.5528814],[-8.7163643,7.5526494],[-8.7163719,7.5524798],[-8.7165807,7.5523377],[-8.7169218,7.5521104],[-8.7170168,7.5517584],[-8.7169978,7.5515584],[-8.7168828,7.5513404],[-8.7168258,7.5506464],[-8.7166538,7.5504474],[-8.7166148,7.5500774],[-8.7167668,7.5497254],[-8.7168238,7.5490884],[-8.7169288,7.5489174],[-8.7173631,7.548619],[-8.7179317,7.5487537],[-8.7185305,7.5491403],[-8.7189984,7.5494022],[-8.7194312,7.5493698],[-8.7197356,7.5494645],[-8.7196702,7.5497863],[-8.7196475,7.5500706],[-8.7195746,7.5508462],[-8.7196073,7.5513351],[-8.7198136,7.5516044],[-8.7202111,7.5517765],[-8.7206212,7.5520309],[-8.7206488,7.552213],[-8.7208275,7.5525073],[-8.7210388,7.5528539],[-8.7214011,7.5532904],[-8.7216428,7.5538434],[-8.7217256,7.5546422],[-8.7220348,7.5548404],[-8.7221978,7.5549354],[-8.7230938,7.5553524],[-8.7232301,7.5556024],[-8.7233433,7.5561884],[-8.7235194,7.5562308],[-8.7238017,7.5562668],[-8.7239547,7.5560234],[-8.7240615,7.5552298],[-8.7244457,7.5541717],[-8.7247055,7.5537837],[-8.7251751,7.5540377],[-8.7255131,7.5544751],[-8.7255202,7.5548525],[-8.7253708,7.5550676],[-8.7255131,7.5554309],[-8.7258547,7.5560305],[-8.7257052,7.5566301],[-8.7253103,7.5574378],[-8.7250043,7.5574343],[-8.7245987,7.5580586],[-8.7243425,7.5580868],[-8.7240259,7.5578081],[-8.7237911,7.5578081],[-8.7235598,7.5577305],[-8.723478,7.557496],[-8.7232382,7.5574704],[-8.7228695,7.5584223],[-8.7227078,7.558709],[-8.7221928,7.5586126],[-8.7218758,7.5587223],[-8.7219463,7.5590864],[-8.7224646,7.559079],[-8.7228381,7.5592158],[-8.7227841,7.5594556],[-8.7226306,7.5596476],[-8.7224546,7.5597813],[-8.7225025,7.5602623],[-8.7224149,7.5604374],[-8.7222014,7.5605961],[-8.7219381,7.5603246],[-8.7217465,7.5602286],[-8.7213831,7.5602223],[-8.721344,7.5606702],[-8.7213013,7.5609524],[-8.7213747,7.561097],[-8.7218585,7.5613692],[-8.7218067,7.5620261],[-8.7220632,7.5627544],[-8.7218614,7.5632287],[-8.7212817,7.5638939],[-8.7208325,7.5643494],[-8.7205683,7.5642396],[-8.7205198,7.563944],[-8.7203911,7.5636803],[-8.7202136,7.5636482],[-8.7198428,7.5640124],[-8.7200346,7.5644829],[-8.719935,7.5647616],[-8.719682,7.5647957],[-8.7192708,7.5645644],[-8.7190793,7.5648021],[-8.7187176,7.5651876],[-8.7184803,7.5655382],[-8.7183428,7.5659061],[-8.7178993,7.566132],[-8.7178085,7.5664842],[-8.7183083,7.5664598],[-8.7183938,7.5666665],[-8.7186821,7.5668659],[-8.7190298,7.5671417],[-8.7195805,7.5673405],[-8.7198727,7.5675902],[-8.7202198,7.5676582],[-8.7202268,7.567793],[-8.7197418,7.5678224],[-8.7196368,7.5679754],[-8.7195429,7.5681521],[-8.7196073,7.5683181],[-8.7192301,7.5683078],[-8.7192497,7.5686129],[-8.7195138,7.5687354],[-8.7200988,7.5686759],[-8.7202488,7.5690384],[-8.7202868,7.5691624],[-8.7202258,7.5693692],[-8.7200146,7.5694911],[-8.7199938,7.5697539],[-8.7202488,7.5698654],[-8.7206878,7.5699784],[-8.7207448,7.5701304],[-8.7207258,7.5702544],[-8.7205838,7.5704344],[-8.7204888,7.5706444],[-8.7205268,7.5708154],[-8.720676,7.5708571],[-8.7208541,7.5708582],[-8.7211931,7.5708616],[-8.7216378,7.5708397],[-8.7217568,7.5710414],[-8.7214898,7.5713744],[-8.7214908,7.5714884],[-8.7217869,7.5716571],[-8.7217945,7.5717131],[-8.7215559,7.5718061],[-8.7214591,7.5719728],[-8.7214256,7.5722724],[-8.7215621,7.5724823],[-8.7215384,7.572676],[-8.7212964,7.5729494],[-8.7217785,7.5732386],[-8.7220774,7.573198],[-8.7222796,7.5732681],[-8.7223656,7.5734325],[-8.722437,7.5738395],[-8.7225488,7.5738858],[-8.7228604,7.5736992],[-8.7230665,7.5736124],[-8.7233244,7.5736815],[-8.723586,7.5737923],[-8.7236625,7.5738963],[-8.7236554,7.5740145],[-8.7235024,7.5741732],[-8.723047,7.5740462],[-8.7228477,7.5740762],[-8.7228335,7.5743337],[-8.7230288,7.5744984],[-8.7234703,7.5746546],[-8.7237123,7.5747975],[-8.7236312,7.5750055],[-8.7235184,7.5751162],[-8.723337,7.5750525],[-8.7232094,7.5751112],[-8.7232626,7.5754602],[-8.722875,7.5756962],[-8.7225761,7.5758846],[-8.7226673,7.5763014],[-8.7223507,7.5764244],[-8.7214464,7.57657],[-8.7213197,7.5772932],[-8.7207574,7.5774313],[-8.7203673,7.5775895],[-8.7201891,7.5783095],[-8.7205868,7.5796278],[-8.7203234,7.5798688],[-8.7200929,7.5794796],[-8.7197965,7.5793993],[-8.7196572,7.5796027],[-8.7199738,7.5802003],[-8.7198269,7.5804539],[-8.7195305,7.580474],[-8.7190492,7.5801375],[-8.7186946,7.5800295],[-8.7182919,7.5806296],[-8.7181703,7.5809912],[-8.7183172,7.5812875],[-8.7186591,7.5818299],[-8.7188973,7.5824852],[-8.7183116,7.5829225],[-8.7183977,7.5832489],[-8.7187245,7.5831032],[-8.719031,7.5831309],[-8.7191653,7.5834347],[-8.7190335,7.5838063],[-8.719107,7.5840247],[-8.7195857,7.5841352],[-8.7195072,7.5846349],[-8.7188841,7.5847152],[-8.7186181,7.5844742],[-8.7184256,7.5847579],[-8.7177797,7.5847931],[-8.7176479,7.5849488],[-8.7179519,7.5851069],[-8.7178759,7.5854183],[-8.7172148,7.5852827],[-8.7163383,7.5851597],[-8.7161256,7.5854459],[-8.7162928,7.5861665],[-8.7163738,7.5865382],[-8.7164321,7.5876882],[-8.7164093,7.588356],[-8.7161636,7.5884439],[-8.7159077,7.5887352],[-8.7160774,7.589147],[-8.7158165,7.5894483],[-8.7155126,7.5895864],[-8.7153074,7.5894006],[-8.7148565,7.5893001],[-8.71436,7.5894081],[-8.7142663,7.5896567],[-8.7143904,7.589835],[-8.7147349,7.5899254],[-8.7148666,7.5901086],[-8.7146665,7.5902919],[-8.714164,7.5905678],[-8.7140171,7.5908483],[-8.7147336,7.5909833],[-8.7146762,7.5914342],[-8.7142392,7.5918035],[-8.7142213,7.5922722],[-8.7145114,7.5925634],[-8.7146261,7.5928422],[-8.7145992,7.5929806],[-8.7143825,7.5930303],[-8.7141819,7.5930943],[-8.7141461,7.5933126],[-8.7139419,7.5935506],[-8.7135084,7.5939234],[-8.712774,7.5947437],[-8.7125842,7.5953402],[-8.7124301,7.5954467],[-8.7121579,7.5958764],[-8.7119573,7.5961835],[-8.711531,7.5962457],[-8.7106927,7.5958163],[-8.7101876,7.595905],[-8.7102234,7.5962104],[-8.7106103,7.596356],[-8.7109685,7.5970058],[-8.7121686,7.5974035],[-8.7125912,7.5970021],[-8.7128647,7.5972796],[-8.7126342,7.5975859],[-8.7128492,7.5977261],[-8.7132683,7.5973817],[-8.7134707,7.5975166],[-8.7133507,7.5979445],[-8.7134922,7.5983511],[-8.7137197,7.5986476],[-8.7138737,7.598708],[-8.7137841,7.5988482],[-8.7132715,7.5987383],[-8.7131606,7.5991919],[-8.7131328,7.5996904],[-8.7129529,7.6000848],[-8.7122489,7.60012],[-8.7121059,7.6003532],[-8.7121059,7.6008511],[-8.7121853,7.6016641],[-8.7120804,7.6019886],[-8.7122044,7.6025306],[-8.7126686,7.6026189],[-8.7131041,7.6028268],[-8.7135746,7.6026567],[-8.713813,7.6026945],[-8.7142136,7.6032743],[-8.7144393,7.6038194],[-8.7144711,7.6041409],[-8.713918,7.6045663],[-8.7129483,7.6048719],[-8.7125261,7.6052706],[-8.7117415,7.6058031],[-8.7118652,7.6059435],[-8.7124856,7.6061062],[-8.7127239,7.6064003],[-8.7129352,7.6067857],[-8.7127733,7.607062],[-8.7124631,7.6071868],[-8.712054,7.6071601],[-8.7119483,7.6072336],[-8.7120517,7.6074854],[-8.7120023,7.6079578],[-8.7115369,7.6083374],[-8.7112419,7.6087654],[-8.7112039,7.6089084],[-8.7112899,7.6093264],[-8.7113849,7.6094964],[-8.7115289,7.6096394],[-8.7119669,7.6097624],[-8.7121679,7.6098664],[-8.712027,7.6101592],[-8.7121462,7.6104689],[-8.7119955,7.6112154],[-8.7124429,7.6114627],[-8.7128369,7.6116994],[-8.7128369,7.6121174],[-8.7130189,7.6125354],[-8.7130289,7.6127254],[-8.7127519,7.6127064],[-8.7124002,7.6126837],[-8.7116741,7.6126458],[-8.7114043,7.612882],[-8.7114358,7.6131984],[-8.7115302,7.6134413],[-8.7121462,7.6133254],[-8.7123687,7.6133923],[-8.7124901,7.6136953],[-8.7118944,7.6139671],[-8.7115145,7.6146311],[-8.711166,7.6152149],[-8.7110536,7.6156026],[-8.7109143,7.6158789],[-8.7109053,7.6163334],[-8.7104872,7.6164448],[-8.7100938,7.6158031],[-8.7097004,7.6157229],[-8.7096487,7.6162198],[-8.7097363,7.6167189],[-8.7096149,7.616759],[-8.7093317,7.6165161],[-8.7088237,7.6163067],[-8.7083493,7.6162242],[-8.7082167,7.6168593],[-8.7081245,7.6170041],[-8.7078593,7.6175188],[-8.7073175,7.6181716],[-8.7066724,7.6181917],[-8.7065779,7.6186395],[-8.7064813,7.6187287],[-8.70647,7.619054],[-8.7068297,7.6193793],[-8.706569,7.6195731],[-8.706551,7.6198583],[-8.7067578,7.6199006],[-8.7072096,7.6202215],[-8.7075491,7.6207228],[-8.7080639,7.6209568],[-8.7084415,7.6210971],[-8.7090664,7.6214135],[-8.7091204,7.6217076],[-8.708682,7.6216542],[-8.7083246,7.6217433],[-8.7081358,7.6220329],[-8.7078031,7.6221288],[-8.7075378,7.6225432],[-8.7070163,7.6225031],[-8.7063959,7.6224006],[-8.7062025,7.6224942],[-8.7060047,7.622942],[-8.7052696,7.6229687],[-8.7047796,7.6233832],[-8.7047706,7.6235302],[-8.7050044,7.6237174],[-8.7052831,7.6239848],[-8.705382,7.6242343],[-8.7053348,7.6245752],[-8.7051707,7.6247111],[-8.7049684,7.6245485],[-8.7047144,7.6244326],[-8.7045256,7.6244883],[-8.704566,7.6248247],[-8.7045975,7.6251122],[-8.7050313,7.6253038],[-8.7055326,7.6255689],[-8.7061846,7.6258809],[-8.7065577,7.6261282],[-8.7070118,7.6262975],[-8.7071017,7.6266696],[-8.7072861,7.6271731],[-8.7071422,7.627289],[-8.7067668,7.6270573],[-8.7062632,7.6267587],[-8.7060339,7.6269125],[-8.706297,7.62724],[-8.7065173,7.6277101],[-8.7061954,7.6280831],[-8.706305,7.6281304],[-8.7064704,7.6283698],[-8.7064386,7.6285195],[-8.7060714,7.6285305],[-8.7059824,7.6286408],[-8.7059379,7.6290898],[-8.7062828,7.6291009],[-8.7066468,7.6291812],[-8.7066961,7.6294569],[-8.7064942,7.6295341],[-8.7064513,7.6297058],[-8.7064084,7.630147],[-8.7065292,7.6306984],[-8.7065546,7.6310529],[-8.7068662,7.6311049],[-8.7073367,7.6311884],[-8.7075131,7.6313837],[-8.707521,7.6317508],[-8.7073891,7.6321368],[-8.7070807,7.6323101],[-8.7070505,7.6325055],[-8.7071427,7.6326094],[-8.7072413,7.6330049],[-8.7072937,7.6330553],[-8.7074511,7.632997],[-8.7077038,7.6330033],[-8.7078024,7.6330726],[-8.7079375,7.6332837],[-8.7077563,7.6336051],[-8.7078183,7.6337674],[-8.7079741,7.6338793],[-8.7081171,7.6336429],[-8.7082681,7.633591],[-8.7084191,7.6336792],[-8.7084398,7.633884],[-8.7082634,7.6343582],[-8.7085272,7.6346812],[-8.7088372,7.6348954],[-8.7088833,7.6351522],[-8.7093808,7.6354831],[-8.7096002,7.6357352],[-8.7096844,7.6359683],[-8.7099101,7.6361936],[-8.7100612,7.6364047],[-8.7102519,7.6368067],[-8.7103722,7.6369159],[-8.7107476,7.6372501],[-8.7110645,7.6375721],[-8.711477,7.6378105],[-8.7116647,7.6380845],[-8.7119727,7.6384198],[-8.7123234,7.638451],[-8.7125909,7.6383118],[-8.7129157,7.6382627],[-8.7132765,7.638265],[-8.7138368,7.6381614],[-8.7143518,7.6381984],[-8.7143193,7.638416],[-8.714243,7.6389958],[-8.7141985,7.6392888],[-8.7139029,7.6400009],[-8.7138854,7.6406815],[-8.7139728,7.6410375],[-8.7141381,7.6413637],[-8.7137535,7.641496],[-8.7132639,7.6416898],[-8.7128363,7.6418788],[-8.7124468,7.641997],[-8.7124039,7.6423656],[-8.7124198,7.6429864],[-8.7117967,7.6433251],[-8.7114152,7.6436039],[-8.711331,7.6437819],[-8.7109606,7.6441443],[-8.7104694,7.6441679],[-8.7101468,7.644357],[-8.7100705,7.6446279],[-8.7097684,7.6447083],[-8.7096063,7.6446894],[-8.7093075,7.6447666],[-8.7090786,7.6448469],[-8.7087495,7.6449036],[-8.7087114,7.6450895],[-8.7084468,7.6453703],[-8.7080748,7.6453233],[-8.7076938,7.6451813],[-8.7076528,7.6450691],[-8.7071155,7.6447855],[-8.7065925,7.6446279],[-8.7063398,7.6445129],[-8.706122,7.6445303],[-8.7061459,7.6448375],[-8.7059042,7.6449698],[-8.7055959,7.6452203],[-8.7055959,7.6455385],[-8.7057199,7.6455354],[-8.7061061,7.6455779],[-8.7062841,7.6459671],[-8.7060791,7.6461939],[-8.7059281,7.6461608],[-8.705483,7.6461813],[-8.7053511,7.646342],[-8.705483,7.6465799],[-8.7057405,7.64675],[-8.7059344,7.6470793],[-8.7057707,7.6473203],[-8.705855,7.647648],[-8.7065989,7.648201],[-8.7068198,7.6485177],[-8.7070344,7.6486752],[-8.7073603,7.6486264],[-8.707516,7.6490344],[-8.7073476,7.6493967],[-8.706858,7.6492297],[-8.7064765,7.6491636],[-8.7059742,7.6491825],[-8.7056786,7.6492304],[-8.7054729,7.6494298],[-8.7052447,7.6494142],[-8.7051331,7.6495266],[-8.7051553,7.6497566],[-8.7050711,7.6499929],[-8.7048565,7.6500764],[-8.7043908,7.6499425],[-8.7041142,7.6500906],[-8.704111,7.6503442],[-8.7043923,7.6505018],[-8.7045195,7.6505475],[-8.7047548,7.6509271],[-8.7044369,7.6510311],[-8.7042795,7.6510768],[-8.7044353,7.6512895],[-8.7044829,7.6515447],[-8.7044019,7.6517999],[-8.7041793,7.651688],[-8.7039711,7.6516817],[-8.7037041,7.6519007],[-8.7037057,7.6521008],[-8.703809,7.6526364],[-8.7035721,7.6528932],[-8.7031636,7.6527703],[-8.7029204,7.6531154],[-8.7029586,7.6534651],[-8.7027678,7.6537597],[-8.7025183,7.6540165],[-8.7022608,7.6539865],[-8.7018332,7.6539834],[-8.7016567,7.6543914],[-8.7015168,7.6549617],[-8.7015884,7.6551649],[-8.7017966,7.6556832],[-8.7014231,7.6557589],[-8.7010257,7.6559337],[-8.7011195,7.6562929],[-8.7009144,7.6564032],[-8.7004391,7.6562598],[-8.7000862,7.6562189],[-8.7000767,7.6563969],[-8.7002229,7.6564741],[-8.7002961,7.6568096],[-8.7001069,7.6569183],[-8.6994918,7.6568317],[-8.6994949,7.6572476],[-8.6998588,7.6578093],[-8.6997058,7.6580463],[-8.6993918,7.6583793],[-8.6991728,7.6587603],[-8.6985628,7.6594923],[-8.6984108,7.6595783],[-8.6975338,7.6596453],[-8.6974568,7.6598163],[-8.6975058,7.6602153],[-8.6976828,7.6604913],[-8.6977542,7.6606836],[-8.6974268,7.6610459],[-8.6969785,7.661298],[-8.6964508,7.6616981],[-8.696314,7.6620132],[-8.6964571,7.6629773],[-8.6965206,7.6638658],[-8.6963426,7.664099],[-8.6961423,7.6640612],[-8.6958244,7.6634216],[-8.6953444,7.6626717],[-8.6947626,7.6622023],[-8.6945274,7.6622369],[-8.6946831,7.662678],[-8.6947422,7.6630607],[-8.694151,7.6631743],[-8.6939352,7.6633815],[-8.6940417,7.6635831],[-8.6939618,7.6639063],[-8.6938278,7.6640873],[-8.6936078,7.6640778],[-8.6933248,7.6640305],[-8.6931945,7.664229],[-8.6929608,7.6648749],[-8.6927494,7.6649679],[-8.692422,7.665075],[-8.6921962,7.6653538],[-8.6920405,7.6659036],[-8.6914378,7.6664992],[-8.6909837,7.666771],[-8.6903138,7.6670339],[-8.6898058,7.6675953],[-8.6888945,7.6684945],[-8.6880615,7.6691057],[-8.6879185,7.6698776],[-8.6880268,7.6706413],[-8.6877318,7.6707933],[-8.6868078,7.6717543],[-8.6864648,7.6718973],[-8.6857968,7.6720873],[-8.6854451,7.6722721],[-8.6847743,7.6721745],[-8.6848538,7.6715758],[-8.6853598,7.6711964],[-8.6855601,7.6711476],[-8.6858338,7.6710993],[-8.6860248,7.6709283],[-8.6861339,7.6706782],[-8.6859511,7.6703883],[-8.6856761,7.6704781],[-8.6847796,7.6705884],[-8.6843368,7.6704833],[-8.6838788,7.6705223],[-8.6833638,7.6707983],[-8.6823718,7.6706853],[-8.6817998,7.6704393],[-8.6811692,7.6708741],[-8.6813377,7.6711892],[-8.6805906,7.6719989],[-8.6803204,7.6722195],[-8.6804094,7.6727614],[-8.6799166,7.6728496],[-8.6797036,7.6730166],[-8.6795733,7.6733096],[-8.6795765,7.6736121],[-8.6800629,7.6741445],[-8.6800247,7.6743588],[-8.6795415,7.6746297],[-8.6794652,7.6748377],[-8.6796083,7.6749259],[-8.679958,7.6751149],[-8.6797068,7.6757913],[-8.6795168,7.6762093],[-8.6792878,7.6765133],[-8.6789358,7.6768463],[-8.6784498,7.6771223],[-8.6780488,7.6774933],[-8.6778018,7.6778553],[-8.6777068,7.6780833],[-8.6779548,7.6787483],[-8.6779938,7.6793463],[-8.6779965,7.6799637],[-8.6785846,7.6804394],[-8.6792924,7.6811186],[-8.6798066,7.6811333],[-8.6807182,7.6811489],[-8.681354,7.6811561],[-8.6814084,7.6814832],[-8.681119,7.6820942],[-8.6811597,7.6826734],[-8.6818717,7.6826446],[-8.6820974,7.683035],[-8.6814722,7.6832806],[-8.6814759,7.6835517],[-8.6819705,7.6836504],[-8.6820816,7.6839337],[-8.6813981,7.6841729],[-8.6811819,7.6845824],[-8.6814935,7.6850361],[-8.6811056,7.6855339],[-8.6802791,7.6862585],[-8.6797178,7.6867943],[-8.6787258,7.6874413],[-8.6785083,7.6874211],[-8.6781904,7.6876164],[-8.6774242,7.6878275],[-8.6770832,7.6886006],[-8.6769171,7.6897888],[-8.6768318,7.6906458],[-8.676569,7.6917611],[-8.6769098,7.6923653],[-8.6770908,7.6926123],[-8.6775678,7.6928773],[-8.6775498,7.6934103],[-8.6774068,7.6935333],[-8.6772058,7.6936193],[-8.6768828,7.6941053],[-8.6766344,7.6942077],[-8.6768586,7.6947341],[-8.6770828,7.695002],[-8.6770705,7.6952545],[-8.6767757,7.6954615],[-8.6764353,7.6957382],[-8.5817851,7.6957766],[-8.5538849,7.6957521],[-8.55395,7.6954759],[-8.55392,7.6951429],[-8.553706,7.6942539],[-8.553553,7.6931939],[-8.553989,7.6932039],[-8.554506,7.6927189],[-8.55483,7.6923039],[-8.554911,7.6921119],[-8.555113,7.6915569],[-8.555123,7.6910819],[-8.555285,7.6909099],[-8.55569,7.6906269],[-8.555954,7.6901619],[-8.557028,7.6893029],[-8.557757,7.6886559],[-8.558274,7.6881199],[-8.558486,7.6878879],[-8.558719,7.6873019],[-8.558709,7.6869779],[-8.558627,7.6867159],[-8.558384,7.6862309],[-8.558424,7.6854939],[-8.558292,7.6852419],[-8.558079,7.6849789],[-8.558018,7.6847369],[-8.5582,7.6836969],[-8.558189,7.6829089],[-8.558067,7.6823739],[-8.557803,7.6818279],[-8.557539,7.6815459],[-8.556951,7.6810719],[-8.556403,7.6805169],[-8.556272,7.6802539],[-8.556494,7.6794359],[-8.556423,7.6790019],[-8.55626,7.6787799],[-8.556007,7.6786589],[-8.555845,7.6785279],[-8.555905,7.6775979],[-8.555631,7.6772049],[-8.555469,7.6768619],[-8.555407,7.6761649],[-8.555863,7.6754879],[-8.555883,7.6751639],[-8.555731,7.6749629],[-8.554393,7.6748119],[-8.55419,7.6747419],[-8.554139,7.6742369],[-8.55421,7.6737819],[-8.554067,7.6734189],[-8.554179,7.6727519],[-8.554047,7.6724999],[-8.554077,7.6721969],[-8.554239,7.6719739],[-8.554563,7.6717419],[-8.554816,7.6713779],[-8.555302,7.6708629],[-8.555383,7.6705899],[-8.555343,7.6703779],[-8.555201,7.6701149],[-8.554937,7.6698019],[-8.554815,7.6695799],[-8.554835,7.6694589],[-8.555099,7.6692269],[-8.555575,7.6690239],[-8.55596,7.6687009],[-8.556112,7.6685089],[-8.556172,7.6682859],[-8.55601,7.6678419],[-8.55603,7.6675899],[-8.556141,7.6672969],[-8.556597,7.6666199],[-8.55683,7.6661549],[-8.557103,7.6658819],[-8.557225,7.6655889],[-8.557498,7.6652859],[-8.557447,7.6651339],[-8.556971,7.6646699],[-8.556849,7.6644179],[-8.556828,7.6641849],[-8.557051,7.6636899],[-8.557264,7.6630139],[-8.557192,7.6627809],[-8.556401,7.6616709],[-8.556401,7.6610249],[-8.555934,7.6605609],[-8.555853,7.6600959],[-8.555751,7.6598739],[-8.555599,7.6596919],[-8.555143,7.6593689],[-8.555041,7.6591879],[-8.555031,7.6589759],[-8.555274,7.6584699],[-8.555243,7.6583089],[-8.554899,7.6579559],[-8.554006,7.6576229],[-8.553743,7.6572899],[-8.553762,7.6567039],[-8.553813,7.6565019],[-8.554015,7.6560879],[-8.554188,7.6558759],[-8.55437,7.6553609],[-8.554785,7.6549259],[-8.554957,7.6544809],[-8.555494,7.6537129],[-8.555625,7.6531379],[-8.555644,7.6511579],[-8.555958,7.6504709],[-8.556018,7.6502079],[-8.557042,7.6494909],[-8.557285,7.6492679],[-8.557477,7.6489649],[-8.557659,7.6483789],[-8.557629,7.6482069],[-8.557456,7.6479749],[-8.557476,7.6475109],[-8.557608,7.6473489],[-8.557922,7.6472879],[-8.558206,7.6471259],[-8.558368,7.6469849],[-8.558489,7.6467119],[-8.558631,7.6465699],[-8.558854,7.6464889],[-8.559077,7.6463379],[-8.559219,7.6461859],[-8.55938,7.6457919],[-8.559644,7.6454079],[-8.559796,7.6452359],[-8.56013,7.6451049],[-8.560393,7.6448119],[-8.560464,7.6445289],[-8.560291,7.6440639],[-8.560291,7.6436099],[-8.560413,7.6434779],[-8.560676,7.6433669],[-8.561011,7.6433469],[-8.561335,7.6428919],[-8.561355,7.6427499],[-8.561101,7.6423769],[-8.560949,7.6416499],[-8.560958,7.6413269],[-8.56109,7.6408419],[-8.561242,7.6407099],[-8.561505,7.6406189],[-8.561718,7.6402559],[-8.561849,7.6398509],[-8.562052,7.6396189],[-8.562761,7.6391939],[-8.563024,7.6389719],[-8.563267,7.6384669],[-8.563388,7.6373759],[-8.563469,7.6372849],[-8.563682,7.6372239],[-8.563814,7.6372539],[-8.564118,7.6375369],[-8.564341,7.6376579],[-8.564544,7.6376369],[-8.565101,7.6369599],[-8.565698,7.6365149],[-8.566013,7.6364339],[-8.566134,7.6362619],[-8.566225,7.6357879],[-8.56657,7.6356559],[-8.566681,7.6354639],[-8.56738,7.6348169],[-8.567826,7.6346049],[-8.568585,7.6339979],[-8.568849,7.6338459],[-8.569142,7.6335129],[-8.569791,7.6329259],[-8.56978,7.6327549],[-8.570115,7.6324509],[-8.570165,7.6322699],[-8.570094,7.6318449],[-8.569942,7.6315019],[-8.569566,7.6309569],[-8.568583,7.6303919],[-8.567863,7.6300999],[-8.567204,7.6299389],[-8.566302,7.6297879],[-8.565836,7.6297589],[-8.56541,7.6296279],[-8.564852,7.6293859],[-8.564366,7.6290929],[-8.563575,7.6284479],[-8.563047,7.6275189],[-8.562824,7.6272459],[-8.562682,7.6271559],[-8.561841,7.6271259],[-8.561466,7.6270559],[-8.56103,7.6269249],[-8.559864,7.6263699],[-8.558759,7.6259979],[-8.52179,7.5978499],[-8.52105,7.5973559],[-8.518242,7.5951559],[-8.5037378,7.5841892],[-8.499881,7.5813159],[-8.499756,7.5809269],[-8.489244,7.5725609],[-8.4717173,7.5586301],[-8.4710168,7.5571723],[-8.4703491,7.554491],[-8.4701101,7.553627],[-8.4697391,7.551423],[-8.4696081,7.551008],[-8.4674281,7.548415],[-8.4670591,7.547716],[-8.4669631,7.547479],[-8.4668671,7.54678],[-8.4669261,7.545618],[-8.4668181,7.545085],[-8.4666991,7.544765],[-8.4665201,7.544481],[-8.4659841,7.543782],[-8.4655081,7.543332],[-8.4646391,7.542658],[-8.4638651,7.542173],[-8.4623311,7.541842],[-8.4617951,7.541606],[-8.4611411,7.541203],[-8.4607011,7.54105],[-8.4602371,7.540801],[-8.4599511,7.540565],[-8.4594981,7.54002],[-8.4583321,7.539594],[-8.4578801,7.539346],[-8.4574401,7.539015],[-8.4574631,7.538484],[-8.4576631,7.537728],[-8.4577021,7.537378],[-8.4576431,7.537023],[-8.4573441,7.53615],[-8.4572721,7.535723],[-8.4573101,7.534727],[-8.4572181,7.534022],[-8.4566921,7.533602],[-8.4564001,7.533467],[-8.4559061,7.533338],[-8.4551401,7.53295],[-8.4537691,7.531742],[-8.4534441,7.53129],[-8.4532171,7.531077],[-8.4527561,7.531064],[-8.4524381,7.531123],[-8.4519191,7.531071],[-8.4513671,7.53091],[-8.4509841,7.530859],[-8.4499071,7.530892],[-8.4492831,7.530854],[-8.4487581,7.530764],[-8.4480371,7.530519],[-8.4476671,7.530325],[-8.4472581,7.530267],[-8.4471531,7.530614],[-8.4471541,7.5313],[-8.4470171,7.531669],[-8.4467421,7.531975],[-8.4464251,7.532155],[-8.4461921,7.532165],[-8.4460221,7.531986],[-8.4457791,7.531849],[-8.4455561,7.531881],[-8.4441601,7.532684],[-8.4439381,7.532737],[-8.4436741,7.533033],[-8.4433351,7.533255],[-8.4427851,7.533424],[-8.4424681,7.533962],[-8.4421611,7.534057],[-8.4418011,7.533868],[-8.4415791,7.533878],[-8.4414411,7.533984],[-8.4413991,7.534111],[-8.4414731,7.534258],[-8.4417071,7.534458],[-8.4416111,7.534606],[-8.4408921,7.534501],[-8.4401831,7.53504],[-8.4398761,7.535198],[-8.4395801,7.535272],[-8.4394431,7.535389],[-8.4394111,7.535515],[-8.4394531,7.535621],[-8.4397181,7.535947],[-8.4397721,7.536243],[-8.4401321,7.53658],[-8.4401851,7.536844],[-8.4393391,7.537266],[-8.4391801,7.537266],[-8.4390531,7.537087],[-8.4388201,7.536919],[-8.4381951,7.536803],[-8.4374651,7.536814],[-8.4372421,7.536667],[-8.4368931,7.536551],[-8.4361411,7.536467],[-8.4358661,7.536362],[-8.4356971,7.536246],[-8.4354951,7.535983],[-8.4350931,7.536036],[-8.4347021,7.536395],[-8.4343631,7.536522],[-8.4334531,7.536691],[-8.4332731,7.53667],[-8.4329021,7.53628],[-8.4325951,7.536049],[-8.4317271,7.535585],[-8.4313351,7.535311],[-8.4299371,7.534817],[-8.4296831,7.534775],[-8.4293021,7.534818],[-8.4284451,7.535019],[-8.4280221,7.534998],[-8.4279051,7.53484],[-8.4279371,7.534671],[-8.4280741,7.534397],[-8.4280841,7.534165],[-8.4278621,7.533986],[-8.4274381,7.533785],[-8.4262851,7.533839],[-8.4259351,7.533734],[-8.4255331,7.533513],[-8.4246651,7.533187],[-8.4245381,7.533071],[-8.4243681,7.532628],[-8.4244951,7.532449],[-8.4250441,7.531984],[-8.4250221,7.53075],[-8.4246301,7.530276],[-8.4243971,7.529896],[-8.4242901,7.529622],[-8.4241841,7.528947],[-8.4232201,7.527809],[-8.4232621,7.527524],[-8.4236101,7.527028],[-8.4237581,7.526722],[-8.4236301,7.526005],[-8.4234821,7.525541],[-8.4234501,7.525077],[-8.4235231,7.524201],[-8.4238081,7.523484],[-8.4237541,7.523041],[-8.4236061,7.522587],[-8.4235631,7.522303],[-8.4235521,7.521533],[-8.4234771,7.52129],[-8.4231911,7.521006],[-8.4230641,7.520795],[-8.4230531,7.520563],[-8.4230951,7.520373],[-8.4232751,7.520014],[-8.4235171,7.518896],[-8.4234641,7.518495],[-8.4228811,7.517842],[-8.4227641,7.517568],[-8.4227211,7.516428],[-8.4226151,7.51608],[-8.4224131,7.515849],[-8.4220841,7.515227],[-8.4220841,7.514752],[-8.4221891,7.514383],[-8.4224111,7.514013],[-8.4227071,7.513686],[-8.4229711,7.513274],[-8.4233311,7.512557],[-8.4233831,7.512188],[-8.4233621,7.51185],[-8.4232981,7.51166],[-8.4233401,7.511407],[-8.4235511,7.511091],[-8.4236361,7.510711],[-8.4235931,7.510089],[-8.4234551,7.509762],[-8.4232321,7.509414],[-8.4226071,7.50895],[-8.4218551,7.508708],[-8.4216541,7.508445],[-8.4213361,7.508203],[-8.4208911,7.50796],[-8.4206901,7.507718],[-8.4205311,7.507254],[-8.4204671,7.506895],[-8.4197151,7.506527],[-8.4192801,7.505705],[-8.4186231,7.504882],[-8.4179251,7.504609],[-8.4177131,7.504451],[-8.4173841,7.503903],[-8.4172671,7.50328],[-8.4170971,7.502932],[-8.4172131,7.5025],[-8.4172131,7.502226],[-8.4171281,7.501983],[-8.4166201,7.501741],[-8.4163761,7.501562],[-8.4161641,7.501256],[-8.4159731,7.500961],[-8.4158141,7.50056],[-8.4158031,7.500191],[-8.4155701,7.499846],[-8.4153601,7.499394],[-8.4153421,7.499159],[-8.4154811,7.498784],[-8.4157431,7.498462],[-8.4157951,7.498218],[-8.4156631,7.49794],[-8.4154361,7.497609],[-8.4154091,7.497383],[-8.4154521,7.49707],[-8.4156181,7.496626],[-8.4161841,7.496068],[-8.4166201,7.495867],[-8.4168381,7.495684],[-8.4169691,7.495475],[-8.4169941,7.495152],[-8.4168251,7.493133],[-8.4173311,7.492523],[-8.4173041,7.492105],[-8.4171641,7.491845],[-8.4162281,7.490845],[-8.4162011,7.49061],[-8.4162351,7.490009],[-8.4163311,7.489565],[-8.4161211,7.489348],[-8.4146091,7.488375],[-8.4142681,7.487967],[-8.4139271,7.487445],[-8.4132011,7.487124],[-8.4125731,7.486933],[-8.4122411,7.486716],[-8.4120661,7.486542],[-8.4118641,7.486046],[-8.4113751,7.48562],[-8.4111741,7.485516],[-8.4109641,7.48516],[-8.4108491,7.484542],[-8.4107531,7.484272],[-8.4105431,7.484003],[-8.4104641,7.483733],[-8.4104101,7.482654],[-8.4098751,7.481645],[-8.4099001,7.480713],[-8.4104311,7.479511],[-8.4103951,7.478911],[-8.4101401,7.47818],[-8.4101301,7.477423],[-8.4102521,7.477109],[-8.4103921,7.476926],[-8.4110451,7.476307],[-8.4112541,7.476046],[-8.4113061,7.475854],[-8.4112971,7.475532],[-8.4111921,7.475297],[-8.4111741,7.475106],[-8.4112961,7.474992],[-8.4115321,7.47494],[-8.4124221,7.475069],[-8.4127281,7.475051],[-8.4130681,7.474938],[-8.4134521,7.474693],[-8.4136521,7.474397],[-8.4136261,7.474284],[-8.4128131,7.473598],[-8.4123931,7.473163],[-8.4121831,7.472806],[-8.4121131,7.47258],[-8.4120591,7.472032],[-8.4113001,7.471728],[-8.4112381,7.47158],[-8.4107153,7.4712046],[-8.4104832,7.4710726],[-8.4098656,7.4707324],[-8.409598,7.4704875],[-8.4095569,7.4703583],[-8.4096395,7.4700214],[-8.409501,7.4699663],[-8.4093648,7.4698412],[-8.4092568,7.4696832],[-8.4090559,7.4696165],[-8.4088158,7.4695555],[-8.4087748,7.4693958],[-8.4087063,7.4691168],[-8.4085689,7.4690011],[-8.4084453,7.4688139],[-8.4079101,7.4684534],[-8.4076494,7.4682221],[-8.4074641,7.4679159],[-8.4072858,7.4675417],[-8.4072206,7.4673888],[-8.4072859,7.4671869],[-8.4074302,7.4670585],[-8.4076289,7.4671133],[-8.4078383,7.4671508],[-8.4079893,7.4670487],[-8.4079617,7.4667832],[-8.4077113,7.4666368],[-8.40755,7.4665793],[-8.4076257,7.4663241],[-8.4080578,7.4659534],[-8.4082086,7.4658819],[-8.408386,7.4659134],[-8.4086499,7.4658829],[-8.4087774,7.4656923],[-8.4091661,7.4654707],[-8.4092086,7.4653453],[-8.4090905,7.4652654],[-8.4089071,7.4651742],[-8.4087133,7.4651155],[-8.4086557,7.4650085],[-8.4086645,7.4648866],[-8.408827,7.4648039],[-8.4090202,7.4648039],[-8.4092595,7.4646753],[-8.4093217,7.4644907],[-8.4093167,7.4640366],[-8.4091879,7.4638165],[-8.4089635,7.46369],[-8.4088394,7.4635831],[-8.408849,7.4634326],[-8.4088688,7.4632139],[-8.409007,7.4631015],[-8.4092705,7.4631388],[-8.4094176,7.4631172],[-8.4094781,7.4629854],[-8.4091695,7.4628533],[-8.4088929,7.4628533],[-8.4086557,7.462788],[-8.4085547,7.4627009],[-8.4085941,7.4625625],[-8.4086692,7.4624302],[-8.4085767,7.4622132],[-8.4084618,7.4621241],[-8.4084903,7.4617735],[-8.4083728,7.4615291],[-8.4082122,7.4613772],[-8.4077073,7.4608435],[-8.407568,7.4605469],[-8.4072722,7.4602809],[-8.4071626,7.4599605],[-8.4069551,7.4599612],[-8.4067494,7.4599774],[-8.4066221,7.4599228],[-8.4065175,7.4599923],[-8.4063985,7.4600353],[-8.406261,7.4600012],[-8.4063012,7.4598347],[-8.4062239,7.4597463],[-8.4062094,7.4595715],[-8.4063162,7.4594648],[-8.4063063,7.4593728],[-8.4062266,7.4592851],[-8.4060993,7.4592987],[-8.4059122,7.4590383],[-8.405772,7.4588251],[-8.4057159,7.4585584],[-8.4057749,7.4581765],[-8.406149,7.4580119],[-8.4063744,7.458053],[-8.4066435,7.4576287],[-8.4065286,7.4573912],[-8.4064338,7.4570575],[-8.4064692,7.4568724],[-8.4066408,7.4567389],[-8.4066359,7.4562856],[-8.406711,7.4559959],[-8.4068795,7.4558258],[-8.4070349,7.4557962],[-8.4071744,7.4559267],[-8.4074551,7.4558907],[-8.4076101,7.4556245],[-8.4076615,7.4552101],[-8.407571,7.4546549],[-8.4074407,7.4547322],[-8.4072908,7.4547071],[-8.4071759,7.4546844],[-8.4071312,7.4545548],[-8.4069386,7.4544791],[-8.4067803,7.4545412],[-8.4066403,7.4544456],[-8.4065318,7.4541722],[-8.4063728,7.4535509],[-8.4064399,7.4531471],[-8.4062763,7.4528862],[-8.40633,7.4525944],[-8.4062421,7.4524048],[-8.4060789,7.452271],[-8.4059323,7.4521069],[-8.4059736,7.4518448],[-8.4060993,7.4517787],[-8.4061984,7.451781],[-8.4062762,7.4516645],[-8.4062506,7.4514718],[-8.4061578,7.4513229],[-8.4060262,7.4511663],[-8.405956,7.450914],[-8.4060262,7.4505748],[-8.4062719,7.4503573],[-8.406535,7.4503486],[-8.4066315,7.4501573],[-8.4066929,7.4498876],[-8.4065789,7.4495484],[-8.4064561,7.4492874],[-8.4064649,7.4490874],[-8.4066052,7.4489743],[-8.406535,7.4488177],[-8.4064624,7.4487356],[-8.4064122,7.4486785],[-8.4067719,7.4483219],[-8.4069473,7.4482697],[-8.407193,7.4483045],[-8.4074649,7.4482871],[-8.4078421,7.4479044],[-8.4082983,7.4473912],[-8.4083773,7.4471215],[-8.4084036,7.4466953],[-8.4084825,7.4463821],[-8.4086141,7.4462256],[-8.4088334,7.4461821],[-8.4091405,7.4462343],[-8.4093598,7.4461908],[-8.4095791,7.4459559],[-8.4096054,7.4456688],[-8.4095177,7.4447642],[-8.4094387,7.4442336],[-8.4093598,7.4438161],[-8.4091668,7.443529],[-8.4089423,7.4433829],[-8.4087882,7.443064],[-8.4084531,7.4426786],[-8.408433,7.44226],[-8.4082856,7.4421404],[-8.4084598,7.4419676],[-8.4090964,7.4415623],[-8.409847,7.4412766],[-8.4102021,7.4410108],[-8.4103428,7.4406387],[-8.4109258,7.4405856],[-8.4110263,7.4403729],[-8.410966,7.44026],[-8.4106846,7.4402467],[-8.4106243,7.4400009],[-8.4111737,7.4397949],[-8.4113882,7.4394494],[-8.4119176,7.4393032],[-8.4123531,7.4386321],[-8.4130232,7.4384261],[-8.4133382,7.4375224],[-8.4139077,7.4369842],[-8.4141222,7.4367849],[-8.4143768,7.4369709],[-8.4143567,7.4374028],[-8.4149464,7.4372566],[-8.4151474,7.4366918],[-8.414933,7.4361869],[-8.4151407,7.4357417],[-8.415382,7.4349177],[-8.4149598,7.4345656],[-8.4143567,7.4347184],[-8.4139144,7.4349044],[-8.413633,7.434725],[-8.4140954,7.434034],[-8.4139547,7.4337682],[-8.4135861,7.4339609],[-8.413298,7.4336885],[-8.4134856,7.4331104],[-8.4143835,7.4323329],[-8.4143634,7.4320738],[-8.4139949,7.4319675],[-8.4140619,7.431622],[-8.414417,7.4314691],[-8.4147655,7.4316751],[-8.4146203,7.430978],[-8.4145782,7.4307076],[-8.4142892,7.4300116],[-8.4141935,7.4287987],[-8.4143845,7.4286094],[-8.4144023,7.4283988],[-8.4135203,7.4282573],[-8.4135721,7.4278325],[-8.4134212,7.4277586],[-8.4133422,7.4276106],[-8.4135512,7.4270266],[-8.4134112,7.4267306],[-8.4133582,7.4264876],[-8.4134282,7.4263396],[-8.4139512,7.4262606],[-8.4140212,7.4260686],[-8.4140032,7.4258596],[-8.4136478,7.4252586],[-8.4135116,7.4250659],[-8.4134731,7.4249062],[-8.4129318,7.424852],[-8.412661,7.4245814],[-8.412327,7.4245439],[-8.4114956,7.4250889],[-8.4109743,7.4253297],[-8.4108353,7.4252947],[-8.4108083,7.4251387],[-8.4108603,7.4249817],[-8.4113833,7.4244847],[-8.4113743,7.4242327],[-8.4106509,7.4242626],[-8.4104608,7.4238825],[-8.4103972,7.423547],[-8.410245,7.423445],[-8.4099733,7.4235539],[-8.4095769,7.4232002],[-8.4089499,7.4226694],[-8.4086612,7.4223959],[-8.4081259,7.4222763],[-8.4077495,7.4220466],[-8.4075303,7.4217917],[-8.4069443,7.4209827],[-8.4066823,7.4209227],[-8.4059753,7.4208977],[-8.4056603,7.4208027],[-8.4054163,7.4206367],[-8.4052153,7.4204287],[-8.4050403,7.4200807],[-8.4048733,7.4198717],[-8.4044893,7.4195247],[-8.4042443,7.4192287],[-8.4037533,7.4181157],[-8.4031503,7.4175677],[-8.4030103,7.4173507],[-8.4029393,7.4167847],[-8.4028263,7.4165587],[-8.4026333,7.4163067],[-8.4022053,7.4159587],[-8.4021523,7.4158287],[-8.4021703,7.4156367],[-8.4022653,7.4154107],[-8.4022743,7.4151757],[-8.4022123,7.4148357],[-8.4019493,7.4143317],[-8.4012073,7.4137757],[-8.4009411,7.4135045],[-8.4007001,7.4132991],[-8.4007002,7.4129862],[-8.4000222,7.4123737],[-8.4001146,7.4122724],[-8.4004989,7.4122821],[-8.4006983,7.4120988],[-8.4006778,7.4117455],[-8.4004989,7.4116019],[-8.4002764,7.4115309],[-8.4003856,7.4113843],[-8.4004989,7.4114331],[-8.4006448,7.4115055],[-8.4007081,7.4112498],[-8.4006318,7.4109762],[-8.4002333,7.4106697],[-8.4002063,7.4104077],[-8.4002673,7.4102427],[-8.4003983,7.4100767],[-8.4004153,7.4098597],[-8.4003273,7.4096417],[-8.3999693,7.4092687],[-8.3999073,7.4091207],[-8.3999933,7.4080147],[-8.3993533,7.4066667],[-8.3993093,7.4061447],[-8.3994203,7.4046987],[-8.3993853,7.4043687],[-8.3990953,7.4036207],[-8.3993237,7.4034122],[-8.3993351,7.4030396],[-8.3993733,7.4023227],[-8.3993983,7.4020267],[-8.3989343,7.4008087],[-8.3988283,7.4003307],[-8.3987833,7.3992767],[-8.3986953,7.3989377],[-8.3984853,7.3987027],[-8.3980223,7.3983297],[-8.3978563,7.3980337],[-8.3977683,7.3975467],[-8.3975583,7.3971637],[-8.3977143,7.3964237],[-8.3978917,7.3947626],[-8.3976777,7.3948109],[-8.3973681,7.3943832],[-8.3975703,7.3939607],[-8.3974663,7.3935743],[-8.397274,7.3933638],[-8.3969866,7.3933193],[-8.3967778,7.3931563],[-8.397107,7.3928465],[-8.3971438,7.3924024],[-8.3973053,7.3918627],[-8.3973858,7.39114],[-8.3975681,7.3911078],[-8.397702,7.3914391],[-8.3978771,7.3915983],[-8.3982558,7.3914617],[-8.3983877,7.3912233],[-8.3984694,7.390775],[-8.3982808,7.3906866],[-8.3976339,7.390648],[-8.3975058,7.3908472],[-8.3972107,7.3908216],[-8.3970256,7.3907129],[-8.3969612,7.3904611],[-8.3971023,7.3903227],[-8.3974153,7.3896437],[-8.3978167,7.3891211],[-8.3982273,7.38895],[-8.3984997,7.3887908],[-8.3986992,7.3884676],[-8.3988743,7.3881541],[-8.3988305,7.387966],[-8.3984672,7.387899],[-8.3982273,7.3880287],[-8.3982079,7.3878743],[-8.3983645,7.3876132],[-8.3987624,7.3873967],[-8.3989375,7.3871121],[-8.3987332,7.3869385],[-8.3983066,7.3868686],[-8.3979998,7.3863406],[-8.3977291,7.386393],[-8.3974392,7.3863443],[-8.397253,7.3861279],[-8.3970793,7.3858063],[-8.3969915,7.3853894],[-8.3968779,7.3849272],[-8.3968537,7.3847454],[-8.3968056,7.3844907],[-8.3974102,7.384078],[-8.3979276,7.3839951],[-8.3980471,7.38385],[-8.398058,7.3835553],[-8.3979103,7.3832447],[-8.3977883,7.3829837],[-8.3973603,7.3826187],[-8.3972113,7.3823837],[-8.3972283,7.3821667],[-8.3975323,7.3815387],[-8.3974713,7.3813827],[-8.3974623,7.3808867],[-8.3977233,7.3805557],[-8.3977133,7.3801287],[-8.3978443,7.3799197],[-8.3986813,7.3792747],[-8.3990034,7.3789167],[-8.3992203,7.3784117],[-8.3993163,7.3779677],[-8.3993753,7.3769147],[-8.3992963,7.3766007],[-8.3989383,7.3762447],[-8.3988683,7.3760887],[-8.3991024,7.3755567],[-8.3990934,7.3752697],[-8.3978614,7.3740617],[-8.3975797,7.3741617],[-8.3972853,7.3740277],[-8.3972804,7.3737796],[-8.3977463,7.3731477],[-8.3979633,7.3723897],[-8.3979793,7.3718937],[-8.3978573,7.3715457],[-8.3979083,7.3710847],[-8.3981953,7.3703357],[-8.3982473,7.3699607],[-8.3981853,7.3696307],[-8.3980363,7.3692567],[-8.3978083,7.3684467],[-8.3978253,7.3680207],[-8.3981813,7.3669847],[-8.3982503,7.3665577],[-8.3982143,7.3661577],[-8.3981003,7.3658617],[-8.3979173,7.3655137],[-8.3974274,7.3649137],[-8.3972174,7.3645487],[-8.3971034,7.3639477],[-8.3971454,7.3629467],[-8.3969524,7.3623557],[-8.3971084,7.3619287],[-8.3973842,7.3611779],[-8.3975577,7.3608479],[-8.3978125,7.3608233],[-8.3983634,7.3608217],[-8.3986594,7.3607337],[-8.3989214,7.3605597],[-8.3990954,7.3603327],[-8.3992176,7.3597247],[-8.399762,7.3593045],[-8.3999856,7.3588683],[-8.3997414,7.3586998],[-8.3985084,7.3588717],[-8.3981275,7.3587173],[-8.3978727,7.3584541],[-8.397494,7.3584014],[-8.3973205,7.3586752],[-8.3971505,7.3586312],[-8.3970374,7.3583909],[-8.3967534,7.3581247],[-8.3969595,7.3574081],[-8.3975435,7.3566604],[-8.3976314,7.3563567],[-8.397409,7.3561023],[-8.3971294,7.3559303],[-8.3968923,7.3555162],[-8.3968264,7.3549997],[-8.3968321,7.3545579],[-8.3966587,7.3543227],[-8.3964216,7.3542069],[-8.3968497,7.3539366],[-8.3970338,7.3535786],[-8.3974444,7.3535887],[-8.3977134,7.3538594],[-8.3984,7.354084],[-8.3986547,7.3537927],[-8.3981452,7.3527397],[-8.3983584,7.3522907],[-8.3986513,7.3516691],[-8.3986088,7.3510127],[-8.3989699,7.3506039],[-8.3990335,7.350258],[-8.3994231,7.349717],[-8.3992131,7.349421],[-8.3989601,7.349143],[-8.3977811,7.348509],[-8.3972741,7.34797],[-8.3974211,7.34757],[-8.3971581,7.346874],[-8.3972351,7.345829],[-8.3973131,7.345524],[-8.3975651,7.344949],[-8.3976781,7.344453],[-8.3976421,7.343887],[-8.3975371,7.343679],[-8.3961041,7.342314],[-8.3959991,7.342036],[-8.3957541,7.341784],[-8.3950551,7.341341],[-8.3947931,7.340958],[-8.3949491,7.340436],[-8.3947911,7.340088],[-8.3950091,7.339852],[-8.3956801,7.339373],[-8.3959061,7.339041],[-8.3961501,7.338432],[-8.3961931,7.338084],[-8.3961661,7.337457],[-8.3960081,7.3371],[-8.3956581,7.336726],[-8.3951781,7.336318],[-8.3951341,7.336013],[-8.3952891,7.335151],[-8.3957071,7.334376],[-8.3956101,7.33368],[-8.3956441,7.333523],[-8.3957921,7.333314],[-8.3964121,7.333026],[-8.3964641,7.332843],[-8.3964371,7.332547],[-8.3955631,7.332],[-8.3954761,7.331765],[-8.3954581,7.331565],[-8.3955361,7.331321],[-8.3955361,7.331008],[-8.3951591,7.330086],[-8.3951321,7.329555],[-8.3951841,7.329363],[-8.3955321,7.32891],[-8.3957501,7.328727],[-8.3958631,7.328309],[-8.3958011,7.328065],[-8.3955571,7.327822],[-8.3949281,7.327379],[-8.3947791,7.327222],[-8.3946571,7.327014],[-8.3944111,7.3263],[-8.3942361,7.326083],[-8.3936861,7.325962],[-8.3932321,7.325658],[-8.3926021,7.324814],[-8.3922441,7.324179],[-8.3921651,7.323884],[-8.3916311,7.323318],[-8.3914831,7.323058],[-8.3912631,7.322301],[-8.3911321,7.322118],[-8.3906261,7.321814],[-8.3902501,7.32171],[-8.3899271,7.32151],[-8.3896651,7.321241],[-8.3891491,7.320354],[-8.3888341,7.32018],[-8.3883971,7.31985],[-8.3881961,7.319537],[-8.3880821,7.319215],[-8.3878551,7.318798],[-8.3876711,7.318545],[-8.3865621,7.31799],[-8.3857061,7.317808],[-8.3858621,7.316807],[-8.3858611,7.316389],[-8.3854601,7.316285],[-8.3853111,7.316138],[-8.3853191,7.315807],[-8.3854061,7.31545],[-8.3856241,7.315101],[-8.3856581,7.314866],[-8.3844171,7.313858],[-8.3841031,7.313554],[-8.3834301,7.312763],[-8.3831491,7.311614],[-8.3828951,7.311353],[-8.3825111,7.311093],[-8.3819351,7.31092],[-8.3815941,7.310763],[-8.3805021,7.310138],[-8.3802581,7.309904],[-8.3801531,7.309651],[-8.3799421,7.308633],[-8.3798281,7.308346],[-8.3796091,7.308016],[-8.3794601,7.307685],[-8.3793541,7.307076],[-8.3789521,7.306397],[-8.3789081,7.306189],[-8.3794381,7.304926],[-8.3794031,7.304699],[-8.3792811,7.304508],[-8.3787471,7.304004],[-8.3785821,7.303926],[-8.3780321,7.303953],[-8.3777441,7.304014],[-8.3770991,7.304433],[-8.3766451,7.304512],[-8.3764971,7.304434],[-8.3762871,7.304225],[-8.3757361,7.303556],[-8.3753951,7.302773],[-8.3752711,7.30192],[-8.3750351,7.301615],[-8.3749911,7.301276],[-8.3751571,7.301015],[-8.3759761,7.300335],[-8.3761931,7.300047],[-8.3765321,7.299228],[-8.3760341,7.298733],[-8.3758591,7.298437],[-8.3757631,7.298106],[-8.3756231,7.297872],[-8.3753961,7.29768],[-8.3748191,7.297351],[-8.3746091,7.297151],[-8.3746001,7.296689],[-8.3745211,7.296446],[-8.3743461,7.296237],[-8.3740231,7.296055],[-8.3733341,7.295899],[-8.3730281,7.295778],[-8.3728271,7.295517],[-8.3726961,7.295282],[-8.3725191,7.293872],[-8.3713131,7.292759],[-8.3710161,7.292359],[-8.3707621,7.292133],[-8.3707011,7.291916],[-8.3707261,7.291333],[-8.3708481,7.29101],[-8.3708821,7.290697],[-8.3708471,7.290532],[-8.3706201,7.290367],[-8.3702621,7.29021],[-8.3698261,7.290237],[-8.3686141,7.290805],[-8.3680301,7.29098],[-8.3677331,7.290719],[-8.3673571,7.29065],[-8.3671131,7.290502],[-8.3668421,7.290206],[-8.3667101,7.289946],[-8.3663791,7.289815],[-8.3659161,7.289746],[-8.3657681,7.289616],[-8.3656631,7.28939],[-8.3656361,7.28912],[-8.3656881,7.288772],[-8.3658361,7.288484],[-8.3659221,7.28764],[-8.3661221,7.287335],[-8.3661651,7.287143],[-8.3658591,7.28677],[-8.3657191,7.286465],[-8.3657881,7.286204],[-8.3660061,7.286029],[-8.3661801,7.285751],[-8.3661981,7.285611],[-8.3660931,7.285481],[-8.3658311,7.285359],[-8.3657521,7.285246],[-8.3658651,7.285037],[-8.3659001,7.284767],[-8.3658471,7.284654],[-8.3653151,7.284786],[-8.3650361,7.284777],[-8.3650441,7.284612],[-8.3656631,7.283836],[-8.3640221,7.283839],[-8.3638211,7.283621],[-8.3636461,7.283282],[-8.3635581,7.282917],[-8.3635671,7.282516],[-8.3637141,7.282255],[-8.3638801,7.282159],[-8.3640981,7.282167],[-8.3644651,7.282341],[-8.3645871,7.282236],[-8.3646831,7.281992],[-8.3650131,7.281505],[-8.3653881,7.281217],[-8.3655271,7.280851],[-8.3654741,7.280642],[-8.3649411,7.279868],[-8.3648621,7.279555],[-8.3648881,7.279294],[-8.3651401,7.278554],[-8.3653751,7.278231],[-8.3655661,7.278074],[-8.3658111,7.278013],[-8.3663251,7.27803],[-8.3659581,7.27736],[-8.3656431,7.277021],[-8.3654431,7.277108],[-8.3652251,7.2773],[-8.3650941,7.277361],[-8.3650071,7.277265],[-8.3651721,7.276795],[-8.3651101,7.276578],[-8.3649441,7.276482],[-8.3645871,7.2765],[-8.3641941,7.276622],[-8.3633831,7.276772],[-8.3625981,7.277199],[-8.3624241,7.277173],[-8.3621711,7.277043],[-8.3619791,7.277087],[-8.3615781,7.27761],[-8.3611861,7.277976],[-8.3602351,7.277968],[-8.3597901,7.278143],[-8.3595811,7.278161],[-8.3595461,7.278074],[-8.3596761,7.277682],[-8.3601201,7.27715],[-8.3601551,7.276906],[-8.3599281,7.27682],[-8.3597271,7.276524],[-8.3595261,7.276333],[-8.3593601,7.276368],[-8.3590901,7.276612],[-8.3588201,7.276621],[-8.3586281,7.276578],[-8.3585401,7.27643],[-8.3585491,7.276247],[-8.3589141,7.275646],[-8.3589141,7.275394],[-8.3587481,7.275272],[-8.3579971,7.275212],[-8.3579011,7.275299],[-8.3577361,7.275682],[-8.3575881,7.275874],[-8.3574401,7.275796],[-8.3573791,7.275639],[-8.3573871,7.275256],[-8.3575081,7.275013],[-8.3580311,7.274594],[-8.3581271,7.274437],[-8.3580831,7.274281],[-8.3574111,7.273811],[-8.3563721,7.273325],[-8.3558831,7.273039],[-8.3557161,7.27283],[-8.3559251,7.272516],[-8.3561951,7.272264],[-8.3563781,7.27202],[-8.3571021,7.271627],[-8.3573281,7.271409],[-8.3575731,7.271374],[-8.3578691,7.271139],[-8.3578411,7.270181],[-8.3576481,7.269502],[-8.3572461,7.268911],[-8.3570621,7.268572],[-8.3569831,7.268311],[-8.3570181,7.267945],[-8.3571131,7.267606],[-8.3575651,7.266595],[-8.3575471,7.266369],[-8.3574601,7.266212],[-8.3571981,7.266004],[-8.3569971,7.266196],[-8.3568751,7.266248],[-8.3568661,7.265996],[-8.3569441,7.265656],[-8.3574321,7.264976],[-8.3575451,7.264611],[-8.3574301,7.263758],[-8.3574461,7.263079],[-8.3575501,7.262495],[-8.3577071,7.262347],[-8.3579771,7.262234],[-8.3585701,7.262111],[-8.3588141,7.262006],[-8.3592761,7.261605],[-8.3597811,7.260899],[-8.3598681,7.260525],[-8.3600251,7.260333],[-8.3605301,7.260176],[-8.3608271,7.260132],[-8.3610621,7.259879],[-8.3612621,7.259522],[-8.3615321,7.259226],[-8.3621341,7.258955],[-8.3625001,7.258876],[-8.3637301,7.258761],[-8.3639391,7.258657],[-8.3640871,7.258517],[-8.3643481,7.258038],[-8.3644441,7.257716],[-8.3644091,7.257446],[-8.3643211,7.257307],[-8.3634831,7.257064],[-8.3630981,7.256438],[-8.3628971,7.255995],[-8.3623901,7.255273],[-8.3622151,7.254916],[-8.3621351,7.254316],[-8.3624051,7.254176],[-8.3632601,7.254105],[-8.3635571,7.254035],[-8.3637841,7.253878],[-8.3641751,7.253434],[-8.3641041,7.252616],[-8.3655601,7.251961],[-8.3658311,7.251882],[-8.3663271,7.251507],[-8.3671901,7.250618],[-8.3674621,7.250141],[-8.3674801,7.249827],[-8.3677161,7.249461],[-8.3680571,7.248678],[-8.3682231,7.248469],[-8.3688781,7.24792],[-8.3690791,7.247598],[-8.3691841,7.246997],[-8.3690971,7.246788],[-8.3686441,7.246343],[-8.3684601,7.24623],[-8.3681031,7.246334],[-8.3679021,7.24656],[-8.3674991,7.247353],[-8.3673071,7.24757],[-8.3666791,7.247674],[-8.3664871,7.247787],[-8.3662251,7.248127],[-8.3659981,7.248092],[-8.3658761,7.247813],[-8.3658771,7.246959],[-8.3659821,7.246602],[-8.3662091,7.246192],[-8.3667331,7.245531],[-8.3667771,7.245287],[-8.3667781,7.244842],[-8.3666391,7.244267],[-8.3662901,7.243544],[-8.3660291,7.243352],[-8.3656541,7.243186],[-8.3655751,7.24309],[-8.3656451,7.242942],[-8.3658371,7.242715],[-8.3659681,7.242445],[-8.3659341,7.242306],[-8.3650441,7.241974],[-8.3649041,7.241826],[-8.3648871,7.24159],[-8.3651321,7.240937],[-8.3651761,7.240676],[-8.3651241,7.240449],[-8.3650281,7.240266],[-8.3644001,7.240169],[-8.3643831,7.239786],[-8.3638331,7.239873],[-8.3635891,7.239794],[-8.3634581,7.239646],[-8.3633281,7.239009],[-8.3631801,7.238809],[-8.3626821,7.238547],[-8.3624121,7.238294],[-8.3622201,7.238294],[-8.3620631,7.238355],[-8.3620891,7.238729],[-8.3621851,7.23893],[-8.3621151,7.239121],[-8.3616871,7.239016],[-8.3607201,7.237691],[-8.3605371,7.237569],[-8.3603361,7.237481],[-8.3597251,7.237559],[-8.3592631,7.237681],[-8.3586601,7.237776],[-8.3584161,7.237741],[-8.3582331,7.237584],[-8.3581201,7.237017],[-8.3580161,7.23686],[-8.3578061,7.236755],[-8.3573871,7.236755],[-8.3567941,7.237234],[-8.3565321,7.237277],[-8.3560961,7.237259],[-8.3558251,7.237189],[-8.3555811,7.237023],[-8.3554941,7.236875],[-8.3555111,7.236718],[-8.3555991,7.236605],[-8.3560531,7.236257],[-8.3561321,7.236065],[-8.3560881,7.235908],[-8.3555821,7.235638],[-8.3548931,7.23541],[-8.3543871,7.235183],[-8.3540991,7.235018],[-8.3538211,7.23473],[-8.3537511,7.23439],[-8.3538741,7.233231],[-8.3537171,7.233065],[-8.3534821,7.232926],[-8.3532201,7.232847],[-8.3529941,7.232594],[-8.3527931,7.232602],[-8.3525401,7.23289],[-8.3525391,7.233264],[-8.3523211,7.23336],[-8.3520421,7.233386],[-8.3512911,7.23369],[-8.3505931,7.233811],[-8.3504101,7.233724],[-8.3492591,7.232755],[-8.3481951,7.232127],[-8.3476541,7.231935],[-8.3470871,7.23162],[-8.3469481,7.231359],[-8.3469571,7.231158],[-8.3470881,7.230941],[-8.3474201,7.230558],[-8.3484071,7.229531],[-8.3489401,7.228738],[-8.3490631,7.228338],[-8.3490981,7.227954],[-8.3490461,7.227588],[-8.3488631,7.227196],[-8.3485231,7.226821],[-8.3482271,7.226568],[-8.3479041,7.226384],[-8.3471801,7.226166],[-8.3469711,7.226061],[-8.3466571,7.225799],[-8.3461081,7.225137],[-8.3458901,7.225084],[-8.3456891,7.225136],[-8.3454271,7.225571],[-8.3453741,7.225824],[-8.3453021,7.227671],[-8.3450751,7.227959],[-8.3449271,7.228011],[-8.3446911,7.227967],[-8.3435491,7.22753],[-8.3432171,7.227286],[-8.3429381,7.227207],[-8.3428331,7.227242],[-8.3425361,7.227511],[-8.3423711,7.227572],[-8.3422311,7.227537],[-8.3420911,7.227467],[-8.3417601,7.226996],[-8.3415341,7.226918],[-8.3410891,7.226865],[-8.340452,7.226533],[-8.3401901,7.226263],[-8.3398421,7.225522],[-8.3396071,7.224894],[-8.3395211,7.224162],[-8.3396871,7.223387],[-8.3398711,7.222934],[-8.3400381,7.222124],[-8.3401701,7.220564],[-8.3403191,7.219806],[-8.3402761,7.21944],[-8.3401711,7.219257],[-8.3396741,7.218873],[-8.3392471,7.218637],[-8.3384101,7.217687],[-8.3382191,7.217608],[-8.3374421,7.217485],[-8.3372501,7.217328],[-8.3370151,7.216997],[-8.3366841,7.216395],[-8.3365361,7.216282],[-8.3361001,7.216203],[-8.3359781,7.216089],[-8.3358471,7.215872],[-8.3359081,7.215636],[-8.3358651,7.215357],[-8.3355081,7.21493],[-8.3355341,7.214747],[-8.3359541,7.214033],[-8.3359361,7.213702],[-8.3358321,7.213406],[-8.3355621,7.213222],[-8.3351081,7.213048],[-8.3349161,7.21289],[-8.3348211,7.21269],[-8.3349341,7.212298],[-8.3350921,7.212133],[-8.3352921,7.212037],[-8.3355801,7.211994],[-8.3362781,7.211977],[-8.3365141,7.212021],[-8.3367231,7.212073],[-8.3378221,7.212545],[-8.3380491,7.212511],[-8.3381891,7.212363],[-8.3383731,7.211779],[-8.3385211,7.211622],[-8.3391411,7.211187],[-8.3392461,7.210961],[-8.3392811,7.210734],[-8.3391591,7.210586],[-8.3389061,7.210429],[-8.3380871,7.210071],[-8.3359174,7.2084147],[-8.3351401,7.207942],[-8.3348081,7.207776],[-8.3345381,7.207419],[-8.3344691,7.207044],[-8.3343641,7.206852],[-8.3341111,7.20666],[-8.3340151,7.206512],[-8.3339891,7.206311],[-8.3341991,7.205841],[-8.3341471,7.205606],[-8.3333451,7.205195],[-8.3331971,7.205056],[-8.3329441,7.204637],[-8.3327871,7.204602],[-8.3321591,7.204636],[-8.3320021,7.204514],[-8.3318971,7.204375],[-8.3318631,7.204139],[-8.3319681,7.203843],[-8.3319771,7.203625],[-8.3319071,7.20346],[-8.3314451,7.203128],[-8.3303981,7.203249],[-8.3301101,7.203336],[-8.3298741,7.203571],[-8.3297951,7.204024],[-8.3298561,7.204224],[-8.3297331,7.204477],[-8.3295591,7.204529],[-8.3293061,7.204476],[-8.3291051,7.204363],[-8.3288441,7.204284],[-8.3285121,7.204301],[-8.3281451,7.204736],[-8.3276641,7.20559],[-8.3271841,7.206121],[-8.3268781,7.206661],[-8.3266251,7.206965],[-8.3263631,7.207139],[-8.3261271,7.207174],[-8.3259351,7.207026],[-8.3257611,7.206834],[-8.3256911,7.206607],[-8.3256921,7.20618],[-8.3259371,7.205126],[-8.3258851,7.204882],[-8.3257541,7.204655],[-8.3255801,7.204498],[-8.3253621,7.204463],[-8.3250651,7.204489],[-8.3248561,7.204646],[-8.3246901,7.204907],[-8.3245931,7.205578],[-8.3245751,7.206048],[-8.3243831,7.206213],[-8.3242701,7.206144],[-8.3241391,7.205934],[-8.3240611,7.205682],[-8.3240521,7.205324],[-8.3238611,7.204862],[-8.3237211,7.204688],[-8.3233461,7.204478],[-8.3229451,7.20433],[-8.3223091,7.204015],[-8.3216631,7.203544],[-8.3212271,7.203526],[-8.3208781,7.203883],[-8.3208421,7.204336],[-8.3210341,7.204929],[-8.3209811,7.205225],[-8.3207711,7.205399],[-8.3205011,7.205468],[-8.3203441,7.20532],[-8.3196991,7.204483],[-8.3193941,7.204247],[-8.3190891,7.204099],[-8.3186271,7.203549],[-8.3185931,7.202329],[-8.3184551,7.201005],[-8.3182901,7.200761],[-8.3170871,7.199609],[-8.3169651,7.199374],[-8.3166611,7.198136],[-8.3164001,7.197561],[-8.3159291,7.197255],[-8.3153101,7.197071],[-8.3148041,7.196705],[-8.3144731,7.196225],[-8.3144741,7.195206],[-8.3144311,7.194988],[-8.3141951,7.194927],[-8.3138021,7.194961],[-8.3135401,7.195065],[-8.3132881,7.195004],[-8.3118411,7.193704],[-8.3116311,7.193651],[-8.3114301,7.193721],[-8.3112821,7.19386],[-8.3112641,7.194078],[-8.3113081,7.194287],[-8.3116391,7.19454],[-8.3120401,7.194715],[-8.3123541,7.194933],[-8.3124851,7.195264],[-8.3125101,7.195569],[-8.3123791,7.195691],[-8.3118381,7.195795],[-8.3113671,7.196178],[-8.3112181,7.196413],[-8.3110521,7.1965],[-8.3108951,7.196482],[-8.3107911,7.196413],[-8.3105731,7.195558],[-8.3104171,7.19514],[-8.3102341,7.194878],[-8.3100511,7.194765],[-8.3098061,7.194721],[-8.3095451,7.194729],[-8.3093611,7.194869],[-8.3092561,7.195104],[-8.3094051,7.1952],[-8.3097971,7.195226],[-8.3100591,7.195558],[-8.3100841,7.195854],[-8.3100141,7.196037],[-8.3098831,7.196133],[-8.3096921,7.196106],[-8.3091601,7.195879],[-8.3084011,7.19573],[-8.3081301,7.195564],[-8.3067091,7.19443],[-8.3065001,7.194168],[-8.3064051,7.193924],[-8.3063791,7.193567],[-8.3064311,7.193419],[-8.3067721,7.193262],[-8.3069371,7.19328],[-8.3071731,7.193385],[-8.3074871,7.193385],[-8.3077231,7.193264],[-8.3079061,7.193028],[-8.3079591,7.192863],[-8.3079681,7.192497],[-8.3074621,7.192078],[-8.3073491,7.191851],[-8.3074631,7.191399],[-8.3073241,7.191163],[-8.3070711,7.191102],[-8.3049591,7.19103],[-8.3018801,7.190529],[-8.3014001,7.190537],[-8.3011561,7.190711],[-8.3007101,7.191147],[-8.3004661,7.191242],[-8.3002481,7.191207],[-8.3000731,7.191085],[-8.2989921,7.190134],[-8.2987051,7.19002],[-8.2984171,7.189976],[-8.2979021,7.190002],[-8.2974481,7.189958],[-8.2968641,7.189678],[-8.2966981,7.189478],[-8.2966641,7.189216],[-8.2968301,7.18885],[-8.2969871,7.188816],[-8.2978421,7.188808],[-8.2986111,7.187929],[-8.2986991,7.187249],[-8.2986381,7.187084],[-8.2984381,7.186918],[-8.2969191,7.186968],[-8.2963261,7.186942],[-8.2958731,7.186636],[-8.2955061,7.186522],[-8.2949221,7.186095],[-8.2944521,7.185632],[-8.2941991,7.185353],[-8.2941471,7.1851],[-8.2942611,7.184891],[-8.2943921,7.184761],[-8.2951681,7.184649],[-8.2955261,7.184422],[-8.2957881,7.184135],[-8.2959191,7.183883],[-8.2959461,7.183552],[-8.2958851,7.18329],[-8.2955361,7.183037],[-8.2951091,7.182897],[-8.2946911,7.182618],[-8.2943331,7.182347],[-8.2937841,7.181763],[-8.2934001,7.181736],[-8.2928511,7.181622],[-8.2913761,7.181542],[-8.2909661,7.181759],[-8.2908961,7.181846],[-8.2908611,7.182308],[-8.2907551,7.182752],[-8.2907641,7.182979],[-8.2910421,7.183755],[-8.2911631,7.184818],[-8.2910581,7.185306],[-8.2908481,7.185611],[-8.2902281,7.186106],[-8.2897661,7.186298],[-8.2894161,7.186506],[-8.2887181,7.187124],[-8.2881501,7.187446],[-8.2879411,7.187454],[-8.2877751,7.187306],[-8.2876451,7.187044],[-8.2876011,7.186774],[-8.2873445,7.1865727],[-8.2871106,7.1851417],[-8.2863561,7.1841172],[-8.2839825,7.1829205],[-8.2814215,7.1824274],[-8.2811165,7.1821248],[-8.2810832,7.1817289],[-8.2814039,7.1812692],[-8.2829063,7.1801227],[-8.2836598,7.1787848],[-8.2833858,7.1771533],[-8.2831531,7.175845],[-8.2827603,7.1750267],[-8.2822724,7.1743564],[-8.2822724,7.1736429],[-8.2830281,7.1722559],[-8.2844359,7.1703233],[-8.28477,7.169251],[-8.284868,7.1673055],[-8.2845576,7.1668437],[-8.2837495,7.1668437],[-8.2829137,7.1667174],[-8.2826588,7.1662624],[-8.282713,7.1656895],[-8.2829533,7.1650337],[-8.2825814,7.1643777],[-8.2820345,7.1638752],[-8.2806201,7.1636097],[-8.2799779,7.1627905],[-8.279795,7.1621371],[-8.2798857,7.1614528],[-8.2804796,7.1606978],[-8.2814475,7.159953],[-8.2814263,7.1593225],[-8.2812999,7.1590091],[-8.2807609,7.1583978],[-8.2804826,7.157772],[-8.2803507,7.1568934],[-8.2803507,7.1557557],[-8.2803507,7.1545916],[-8.2805615,7.154121],[-8.2814994,7.1536462],[-8.2819028,7.1529258],[-8.2821507,7.1517528],[-8.2825233,7.1513302],[-8.2837988,7.1515035],[-8.2854262,7.1515697],[-8.2876784,7.1501185],[-8.2886329,7.1481823],[-8.2897339,7.1472015],[-8.2922757,7.1456311],[-8.295848,7.1434468],[-8.2965666,7.1426349],[-8.2966451,7.1418741],[-8.2967844,7.141477],[-8.2972158,7.1412544],[-8.2980646,7.1412544],[-8.2985997,7.1409277],[-8.2989655,7.1404237],[-8.2991741,7.139577],[-8.3001376,7.1387897],[-8.302796,7.1357474],[-8.302796,7.1351541],[-8.3025126,7.1347648],[-8.3020113,7.1346197],[-8.3002026,7.1346197],[-8.2980157,7.1341102],[-8.2972693,7.1336586],[-8.2971486,7.1331964],[-8.297279,7.1325675],[-8.2974089,7.1319415],[-8.2987458,7.1304444],[-8.2991885,7.1296059],[-8.2990569,7.1290622],[-8.297821,7.1283615],[-8.2967764,7.1274757],[-8.2958475,7.1263283],[-8.2953129,7.1250398],[-8.2947817,7.1240046],[-8.2947448,7.1231445],[-8.2956654,7.1207478],[-8.2964922,7.1196221],[-8.2968631,7.1185956],[-8.2975776,7.115702],[-8.2975776,7.1146737],[-8.2977807,7.1139594],[-8.2991278,7.1123935],[-8.2992879,7.1116389],[-8.2992879,7.1108453],[-8.2994873,7.1103417],[-8.3007542,7.1090094],[-8.3012497,7.1087363],[-8.3018286,7.1086214],[-8.3023767,7.1082789],[-8.3028082,7.1076265],[-8.3027257,7.1070333],[-8.3024621,7.1062858],[-8.3027781,7.1049395],[-8.3035436,7.1041039],[-8.3040115,7.1027495],[-8.3047844,7.0998735],[-8.304758,7.0992796],[-8.302475,7.0976348],[-8.3019244,7.0959959],[-8.3020348,7.094462],[-8.3025426,7.0935263],[-8.3041323,7.0925122],[-8.3043741,7.0916725],[-8.3040968,7.0907687],[-8.3036884,7.0903635],[-8.3036229,7.0898432],[-8.3044382,7.089218],[-8.304675,7.0879641],[-8.3041397,7.0867877],[-8.3036877,7.0851432],[-8.3033236,7.0843844],[-8.3044084,7.0814889],[-8.3043703,7.0798627],[-8.3040298,7.076596],[-8.3034118,7.075178],[-8.3021006,7.074336],[-8.2988662,7.0732909],[-8.2979652,7.0726114],[-8.2978616,7.0718235],[-8.2984285,7.0711203],[-8.2999965,7.0703992],[-8.3001558,7.0692128],[-8.2996626,7.0677065],[-8.2995171,7.0667676],[-8.3001182,7.0648027],[-8.3010217,7.0636707],[-8.3009043,7.062349],[-8.3001881,7.06152],[-8.2990519,7.0613381],[-8.2988007,7.0596998],[-8.2989133,7.0584252],[-8.2979887,7.0578899],[-8.2975751,7.0561732],[-8.2965486,7.0551167],[-8.2957968,7.0530651],[-8.2949264,7.0508118],[-8.2944026,7.0490292],[-8.2949708,7.0456833],[-8.2944309,7.0437699],[-8.2929521,7.0417754],[-8.2919374,7.0387545],[-8.2920832,7.0377836],[-8.2926235,7.0368005],[-8.2926235,7.0357912],[-8.292318,7.0345482],[-8.2914931,7.0335475],[-8.2902707,7.0326597],[-8.2893358,7.0314626],[-8.2882101,7.0311393],[-8.2879718,7.0306925],[-8.288112,7.0297465],[-8.2885138,7.0294274],[-8.2895429,7.0293107],[-8.290608,7.0289483],[-8.2913763,7.0283993],[-8.2920631,7.0274213],[-8.293025,7.0267052],[-8.293459,7.0257206],[-8.293459,7.0242741],[-8.2931555,7.022467],[-8.2926209,7.0218427],[-8.2910392,7.0211022],[-8.2905314,7.020514],[-8.2904131,7.0194584],[-8.2899207,7.0185113],[-8.2888708,7.0176225],[-8.2874768,7.0175611],[-8.2865749,7.0179932],[-8.2858777,7.0188356],[-8.2853932,7.0193732],[-8.2849767,7.0194248],[-8.2839787,7.0188421],[-8.282886,7.0185107],[-8.2797644,7.0182452],[-8.2788417,7.0176727],[-8.2781216,7.0166722],[-8.2781216,7.0161327],[-8.2785477,7.0154842],[-8.2794202,7.0147915],[-8.2805604,7.0144142],[-8.282012,7.0142641],[-8.2825029,7.0138095],[-8.2826896,7.0125121],[-8.282318,7.0116516],[-8.2807496,7.009556],[-8.2802974,7.0092997],[-8.2792207,7.00927],[-8.2778195,7.0085746],[-8.2771088,7.0078104],[-8.2760385,7.0070136],[-8.2748942,7.0054703],[-8.2747238,7.0044835],[-8.2749645,7.0040589],[-8.2756068,7.0037401],[-8.2762455,7.0031968],[-8.2782642,7.0010163],[-8.2792451,7.000644],[-8.2805241,7.000644],[-8.2814559,7.0010486],[-8.2823347,7.0016201],[-8.2829657,7.0016514],[-8.2841285,7.0014147],[-8.2854055,7.0015052],[-8.2858964,7.001083],[-8.2861484,7.0004263],[-8.2861484,6.9995051],[-8.2866767,6.9977863],[-8.2873995,6.9969194],[-8.287462,6.9960196],[-8.2872748,6.9952762],[-8.2840807,6.9915725],[-8.2837336,6.9904241],[-8.2839382,6.9892345],[-8.2844651,6.9874624],[-8.2848491,6.9872083],[-8.2850746,6.9872978],[-8.2860796,6.9893519],[-8.286557,6.9898888],[-8.2871373,6.9899528],[-8.28975,6.9896249],[-8.2911182,6.9892326],[-8.2937674,6.9868721],[-8.2946343,6.9855367],[-8.2970621,6.9830387],[-8.2979504,6.9826974],[-8.2985164,6.9827536],[-8.2994511,6.9830829],[-8.3010337,6.9828714],[-8.3018988,6.9825341],[-8.3024666,6.9818765],[-8.3027984,6.9792722],[-8.3030055,6.9765991],[-8.3032984,6.9762027],[-8.3045591,6.975999],[-8.3053913,6.9756013],[-8.3066659,6.9741889],[-8.3070982,6.9741132],[-8.3075324,6.9745711],[-8.3088159,6.9778304],[-8.3091994,6.978211],[-8.310815,6.9788464],[-8.3113998,6.9788142],[-8.3118299,6.9784529],[-8.3119939,6.9778669],[-8.3117052,6.9771347],[-8.3106588,6.9764225],[-8.3103841,6.9758227],[-8.3106936,6.9748729],[-8.3111304,6.9745477],[-8.3135598,6.974283],[-8.3175861,6.9732765],[-8.3214373,6.9730395],[-8.3237401,6.9723567],[-8.3259578,6.9719403],[-8.3266755,6.9715375],[-8.3271477,6.9707876],[-8.3271477,6.9698606],[-8.3263642,6.9675272],[-8.3255282,6.9662233],[-8.3250283,6.9648222],[-8.3249979,6.9643084],[-8.324507,6.9635473],[-8.3231854,6.9617286],[-8.3218428,6.960692],[-8.3215719,6.9603155],[-8.3216843,6.9595626],[-8.3222672,6.9583474],[-8.3233798,6.9574465],[-8.3241836,6.9570168],[-8.3243462,6.9562421],[-8.3240626,6.9555229],[-8.3225356,6.9538287],[-8.3214408,6.9520664],[-8.3210899,6.9510215],[-8.321061,6.9500151],[-8.3215347,6.9488394],[-8.3217184,6.9479276],[-8.3213879,6.9460186],[-8.3209701,6.9424046],[-8.3207286,6.9410566],[-8.3200459,6.9397305],[-8.3200459,6.9386995],[-8.3203746,6.9377803],[-8.3203439,6.9365055],[-8.3199129,6.9354051],[-8.3180937,6.9338657],[-8.3176308,6.9325735],[-8.3177743,6.9314624],[-8.3187544,6.9302536],[-8.3190917,6.9291276],[-8.3190009,6.9272959],[-8.3186063,6.9259698],[-8.3177441,6.924684],[-8.3173644,6.9241756],[-8.3163874,6.9231987],[-8.3153761,6.9215747],[-8.3115195,6.9164701],[-8.3099588,6.9150695],[-8.3084519,6.9139551],[-8.3079637,6.912843],[-8.3080756,6.9120928],[-8.3085738,6.91154],[-8.3094679,6.9096923],[-8.3106478,6.9066802],[-8.3120939,6.9043498],[-8.312748,6.9037207],[-8.3135424,6.9034376],[-8.3143795,6.9033768],[-8.3150322,6.9035794],[-8.3165806,6.9043584],[-8.3185337,6.9045461],[-8.3190389,6.9049432],[-8.3197323,6.905032],[-8.3205506,6.9048396],[-8.3232013,6.9041295],[-8.3254894,6.9040253],[-8.327553,6.9040464],[-8.3283675,6.9036748],[-8.3287376,6.9032615],[-8.3287608,6.9026402],[-8.3284603,6.9021355],[-8.3270232,6.901454],[-8.3264817,6.9011952],[-8.3261842,6.9005455],[-8.3260574,6.8990761],[-8.3252748,6.8976484],[-8.3250693,6.896465],[-8.3252288,6.895832],[-8.3260344,6.8949092],[-8.326898,6.894154],[-8.3282493,6.8939234],[-8.32929,6.8929746],[-8.3303448,6.8925638],[-8.3315898,6.8922915],[-8.3335937,6.8915084],[-8.3345717,6.8906454],[-8.3347915,6.8899908],[-8.3350645,6.8887398],[-8.3358368,6.8871857],[-8.336544,6.8862708],[-8.3365885,6.8855202],[-8.3364547,6.8849446],[-8.335426,6.8836681],[-8.3345101,6.8828011],[-8.3319695,6.8810083],[-8.3317128,6.8804986],[-8.3316716,6.8797415],[-8.331587,6.8780193],[-8.3313747,6.8767124],[-8.3310547,6.8754206],[-8.3306178,6.874618],[-8.3298888,6.8741136],[-8.3292045,6.8740005],[-8.3284951,6.8744406],[-8.3270941,6.875707],[-8.3263187,6.8758452],[-8.3257963,6.8756531],[-8.325338,6.8750003],[-8.3251977,6.8740455],[-8.3255034,6.8735524],[-8.3262668,6.8732732],[-8.3275931,6.8731477],[-8.32884,6.8727849],[-8.3296808,6.8721478],[-8.3297962,6.8715291],[-8.329595,6.8708853],[-8.3282602,6.8692866],[-8.3275429,6.8679881],[-8.3263296,6.8665087],[-8.3256553,6.8659689],[-8.3242409,6.8655497],[-8.3235073,6.8649833],[-8.3222355,6.8627889],[-8.3217506,6.8605072],[-8.3209831,6.8590467],[-8.3196357,6.8571144],[-8.3189382,6.8568463],[-8.3181947,6.8569134],[-8.3177455,6.8572925],[-8.317157,6.8580283],[-8.3164352,6.8620967],[-8.3162252,6.8646188],[-8.3157531,6.8655563],[-8.3149068,6.8664376],[-8.3140142,6.8669008],[-8.313298,6.8668218],[-8.3115308,6.8658401],[-8.3097815,6.8654059],[-8.3094083,6.8648014],[-8.3092452,6.8636474],[-8.3094398,6.8631644],[-8.3117294,6.8612248],[-8.3131193,6.8595264],[-8.3132548,6.8588537],[-8.3129223,6.8579515],[-8.3121158,6.8572589],[-8.3103536,6.8564356],[-8.3102537,6.8557492],[-8.3104431,6.855086],[-8.3104843,6.854948],[-8.31269,6.8512783],[-8.3139988,6.8480887],[-8.3154234,6.8466742],[-8.3168758,6.8447168],[-8.3183561,6.8424008],[-8.319414,6.8415309],[-8.320415,6.8411256],[-8.3233282,6.8405873],[-8.3251629,6.839827],[-8.3288707,6.8384125],[-8.3294244,6.8376986],[-8.3296366,6.8359732],[-8.3291895,6.8347935],[-8.3291737,6.8325497],[-8.3289455,6.8293559],[-8.327148,6.8264281],[-8.3241838,6.8245968],[-8.3221971,6.8233659],[-8.3214931,6.8226721],[-8.3211759,6.8216481],[-8.3212446,6.8187494],[-8.3206024,6.816932],[-8.3200897,6.8158368],[-8.3203539,6.8149159],[-8.3214866,6.8140888],[-8.3255796,6.8124318],[-8.3266617,6.8127692],[-8.3277303,6.8141419],[-8.3293786,6.8166684],[-8.3301201,6.8170109],[-8.3308408,6.8166871],[-8.3312758,6.816186],[-8.3312554,6.8154799],[-8.3312554,6.8139731],[-8.3319689,6.8127294],[-8.3320266,6.8119183],[-8.3302481,6.8083038],[-8.3295641,6.8063659],[-8.329164,6.8049026],[-8.3291427,6.8041178],[-8.3295396,6.8036252],[-8.3301708,6.8036734],[-8.3310828,6.8040522],[-8.3322346,6.8037745],[-8.3330555,6.8034729],[-8.3338644,6.8030473],[-8.3341802,6.8021034],[-8.3344919,6.8012258],[-8.338242,6.7978362],[-8.3420421,6.7979417],[-8.3435554,6.7977772],[-8.344478,6.7975322],[-8.3470324,6.7977213],[-8.3478187,6.7975872],[-8.3484823,6.7970965],[-8.3483957,6.7965284],[-8.348351,6.7960551],[-8.3491036,6.7948875],[-8.349484,6.7937592],[-8.3492363,6.792242],[-8.348214,6.7892163],[-8.347441,6.7851986],[-8.3476975,6.7823632],[-8.3483429,6.7802881],[-8.3484316,6.7793987],[-8.3480826,6.7785361],[-8.346141,6.7758588],[-8.3458078,6.7744269],[-8.3457824,6.7722295],[-8.3452912,6.770281],[-8.3442226,6.7676375],[-8.3423323,6.7652816],[-8.3421995,6.7647148],[-8.3425901,6.7626795],[-8.3429336,6.7618265],[-8.3434244,6.7614104],[-8.3447517,6.7610367],[-8.3462532,6.7602624],[-8.3477789,6.759674],[-8.3482723,6.7595923],[-8.3486032,6.7597937],[-8.3486889,6.7605491],[-8.34852,6.761358],[-8.3486809,6.762186],[-8.3490171,6.7630896],[-8.3490058,6.7634926],[-8.3483381,6.7641312],[-8.3474769,6.7654012],[-8.3469408,6.7657885],[-8.3458365,6.7661497],[-8.345633,6.7666114],[-8.3457056,6.7670724],[-8.3461501,6.767431],[-8.3471243,6.7677579],[-8.3474646,6.7677139],[-8.3478403,6.7673546],[-8.3484648,6.7659752],[-8.3491813,6.7651655],[-8.3499939,6.7647987],[-8.350815,6.7646505],[-8.3529841,6.764638],[-8.3558534,6.7662307],[-8.3565529,6.7675316],[-8.3580482,6.7683331],[-8.3590253,6.7679344],[-8.3598555,6.7672756],[-8.3608213,6.7654439],[-8.3618419,6.7640827],[-8.3631116,6.76292],[-8.3639118,6.7619715],[-8.3641704,6.7613498],[-8.3639325,6.7606087],[-8.3633463,6.7600178],[-8.3626601,6.7595461],[-8.3616756,6.7594548],[-8.3606956,6.759561],[-8.3602737,6.7591627],[-8.3598662,6.7582154],[-8.3597269,6.7562752],[-8.3592425,6.755199],[-8.3591069,6.7542988],[-8.3601002,6.7516187],[-8.3605682,6.7513205],[-8.3613767,6.751357],[-8.3624304,6.7514846],[-8.3632507,6.7513059],[-8.3642084,6.7503804],[-8.3650338,6.7492022],[-8.3656306,6.7474314],[-8.3659918,6.7459316],[-8.3664615,6.7447158],[-8.3668137,6.7437098],[-8.3673332,6.7429203],[-8.3676874,6.7425212],[-8.3681277,6.7423794],[-8.3689059,6.7422813],[-8.369439,6.7423964],[-8.3696486,6.742758],[-8.3696158,6.7433017],[-8.3690374,6.7434511],[-8.367909,6.7438376],[-8.3673728,6.7443833],[-8.367127,6.7450883],[-8.3674291,6.74582],[-8.3679494,6.7463608],[-8.368155,6.7467452],[-8.3684202,6.7477959],[-8.3682735,6.7485814],[-8.3687165,6.7495279],[-8.3696948,6.7500615],[-8.3707992,6.7497148],[-8.3718601,6.7490609],[-8.3733031,6.7487155],[-8.3747826,6.748681],[-8.3756674,6.7484097],[-8.3760606,6.7482084],[-8.3761323,6.7476684],[-8.3757178,6.7472567],[-8.3751343,6.7473106],[-8.3742404,6.7473229],[-8.3735213,6.7467557],[-8.3730474,6.7460518],[-8.3728891,6.7449387],[-8.3730353,6.7438515],[-8.3733433,6.7433244],[-8.3742585,6.7430308],[-8.3749055,6.7426636],[-8.3753922,6.7419879],[-8.3754161,6.7413256],[-8.3749978,6.7398908],[-8.3751502,6.7388183],[-8.3753179,6.7381373],[-8.3756341,6.7378506],[-8.3761135,6.7379194],[-8.3772545,6.7391392],[-8.3783288,6.7402062],[-8.3794726,6.7408145],[-8.3802421,6.7409961],[-8.3810819,6.7406867],[-8.3815938,6.739886],[-8.382297,6.7384829],[-8.3827213,6.7379772],[-8.3834473,6.7377007],[-8.3849416,6.7380119],[-8.3855098,6.7383125],[-8.3860959,6.7384095],[-8.3866887,6.7379303],[-8.3869901,6.737254],[-8.3869714,6.7352552],[-8.3873016,6.7321752],[-8.3872495,6.7309853],[-8.3865759,6.730303],[-8.3858382,6.7300695],[-8.3845214,6.730413],[-8.3838954,6.7308653],[-8.3829536,6.7319384],[-8.3821047,6.7323855],[-8.3810018,6.7324751],[-8.3797344,6.7319077],[-8.378968,6.7314046],[-8.3786766,6.7308434],[-8.3787822,6.7300092],[-8.3792233,6.7289928],[-8.3806009,6.7269093],[-8.3817894,6.7256739],[-8.3826769,6.7245286],[-8.3833571,6.7224455],[-8.3839951,6.7216418],[-8.385462,6.7206731],[-8.3862975,6.7205168],[-8.3864735,6.7205623],[-8.3866893,6.7207618],[-8.3865491,6.7214118],[-8.3858429,6.7229005],[-8.3856297,6.7238032],[-8.3856355,6.7246404],[-8.3860531,6.7252713],[-8.3875841,6.725864],[-8.3885748,6.7261009],[-8.3895576,6.7269089],[-8.3904071,6.7276173],[-8.3915667,6.7278243],[-8.3941427,6.727939],[-8.3953371,6.727964],[-8.3963157,6.727373],[-8.3967414,6.726732],[-8.3965976,6.7261749],[-8.3953742,6.7252213],[-8.3941638,6.7238916],[-8.3932268,6.7232155],[-8.3924953,6.7225712],[-8.3918527,6.7214832],[-8.3917671,6.7195246],[-8.3914943,6.7178089],[-8.3922024,6.7174966],[-8.3941896,6.7177613],[-8.3954677,6.7176039],[-8.3964594,6.7167615],[-8.3978864,6.7150102],[-8.3987173,6.7144019],[-8.3997448,6.713923],[-8.4012432,6.7135162],[-8.4028915,6.7133859],[-8.4048091,6.7139337],[-8.4058279,6.7146101],[-8.4067187,6.7154179],[-8.4072712,6.7155158],[-8.4080612,6.7151925],[-8.4095669,6.7129392],[-8.4109456,6.7104101],[-8.4116242,6.7084066],[-8.4118534,6.7068828],[-8.4117269,6.7047499],[-8.4110062,6.7034874],[-8.4091271,6.7021498],[-8.4074544,6.701847],[-8.4064966,6.7015091],[-8.4055659,6.7011307],[-8.4055484,6.7005276],[-8.4058335,6.700097],[-8.4065085,6.6999108],[-8.4074265,6.6990875],[-8.4076092,6.6985668],[-8.4074171,6.6973069],[-8.4075022,6.6965379],[-8.4085276,6.6958012],[-8.4089136,6.6951138],[-8.4090824,6.693812],[-8.4089653,6.6928038],[-8.4086337,6.692059],[-8.4074402,6.6900141],[-8.405933,6.6880433],[-8.4053992,6.6872326],[-8.4049747,6.6860795],[-8.4049404,6.6854739],[-8.4054164,6.6851078],[-8.4062584,6.6850715],[-8.4081618,6.6853332],[-8.4089677,6.685848],[-8.4091525,6.6865295],[-8.4092177,6.6870996],[-8.4095097,6.6875276],[-8.4100979,6.6878058],[-8.4107878,6.6875454],[-8.4113771,6.6868804],[-8.4115819,6.685749],[-8.4122967,6.6845861],[-8.413752,6.6839557],[-8.4148968,6.6830478],[-8.4164859,6.6803792],[-8.4188458,6.675772],[-8.4198393,6.6744927],[-8.4226384,6.6731075],[-8.4236109,6.6728397],[-8.4245981,6.6731752],[-8.4255857,6.6755245],[-8.4261645,6.676781],[-8.4272963,6.6775908],[-8.4282953,6.6776184],[-8.4295052,6.6769476],[-8.4308311,6.6764097],[-8.4315002,6.6745792],[-8.4310928,6.6728543],[-8.4306817,6.6715569],[-8.4307943,6.670861],[-8.4324705,6.6672128],[-8.4326823,6.6643819],[-8.433176,6.6631153],[-8.4336864,6.6624627],[-8.4350375,6.660714],[-8.4369148,6.6591558],[-8.4376276,6.6595947],[-8.4381222,6.6611027],[-8.4384798,6.6635357],[-8.4399073,6.6652828],[-8.4419514,6.6667084],[-8.4439045,6.6667242],[-8.4452532,6.6665351],[-8.4467164,6.6653745],[-8.4492857,6.6627128],[-8.4508371,6.6621624],[-8.4529429,6.6617427],[-8.4536247,6.661093],[-8.4538127,6.6591938],[-8.4541271,6.656838],[-8.454604,6.6547893],[-8.4549741,6.652909],[-8.4549696,6.6516132],[-8.45454,6.6494818],[-8.4517346,6.6467422],[-8.4510678,6.6440725],[-8.4514205,6.642661],[-8.4518252,6.6416843],[-8.4527596,6.6406014],[-8.4539676,6.6399881],[-8.4551271,6.6398628],[-8.4565321,6.6392192],[-8.4584704,6.6376192],[-8.4599247,6.6372754],[-8.4611891,6.637225],[-8.4624766,6.6378522],[-8.4638435,6.6387661],[-8.4650786,6.6401511],[-8.4659834,6.6400498],[-8.4664988,6.639645],[-8.4669302,6.6384062],[-8.4669525,6.6372708],[-8.4660209,6.6356351],[-8.4656308,6.6346962],[-8.4653048,6.6343331],[-8.4651563,6.6334463],[-8.4653276,6.6330435],[-8.4657105,6.6328757],[-8.4665411,6.6330142],[-8.4682582,6.6331208],[-8.4688007,6.6329607],[-8.4707321,6.6327018],[-8.4717308,6.633047],[-8.4719346,6.6332309],[-8.4714332,6.6337772],[-8.4712725,6.6345491],[-8.4716549,6.6353589],[-8.4722744,6.6363592],[-8.4732274,6.6376916],[-8.4741967,6.6380007],[-8.4750905,6.6378932],[-8.4760987,6.6371133],[-8.4775666,6.6365796],[-8.478364,6.6355145],[-8.4782833,6.6324536],[-8.4784559,6.6300783],[-8.4788866,6.628749],[-8.4792955,6.6284905],[-8.4798259,6.6286787],[-8.4807144,6.6301497],[-8.4824636,6.6318199],[-8.4845503,6.6324694],[-8.48614,6.6324257],[-8.4876501,6.6312522],[-8.4908352,6.625276],[-8.4904851,6.6241057],[-8.4895029,6.6228206],[-8.4882295,6.6215659],[-8.4865522,6.6204776],[-8.4853363,6.6193889],[-8.4852331,6.6176318],[-8.4852737,6.6168236],[-8.4864601,6.6152242],[-8.4874327,6.6134072],[-8.4880158,6.6131244],[-8.490317,6.6127466],[-8.4924192,6.612489],[-8.4946524,6.6114877],[-8.4956518,6.6113073],[-8.4968324,6.6120984],[-8.4969293,6.6129828],[-8.4965171,6.61355],[-8.4952693,6.6139043],[-8.4945548,6.6143036],[-8.4940716,6.6152294],[-8.4942129,6.6162945],[-8.4961242,6.6184695],[-8.498547,6.6205272],[-8.4996272,6.6204328],[-8.5009359,6.6190528],[-8.501733,6.6183209],[-8.5025168,6.618315],[-8.5042374,6.6188733],[-8.5056981,6.6185247],[-8.5074093,6.6174061],[-8.5089995,6.6158447],[-8.509462,6.6143907],[-8.5092679,6.6123809],[-8.507073,6.6074821],[-8.5062243,6.6044713],[-8.508942,6.601223],[-8.5102382,6.5987418],[-8.5105765,6.5968668],[-8.5108715,6.595673],[-8.5116089,6.5956369],[-8.5129585,6.5964525],[-8.5167739,6.5995118],[-8.518282,6.5998063],[-8.5209619,6.5992128],[-8.5225367,6.5983042],[-8.5252387,6.5958033],[-8.5257553,6.595842],[-8.5261237,6.5963427],[-8.5264062,6.5973029],[-8.5258518,6.5998906],[-8.524326,6.6047057],[-8.524678,6.6055633],[-8.5255969,6.6067178],[-8.526956,6.6081897],[-8.5280262,6.6101319],[-8.5296802,6.6125776],[-8.5311251,6.6131708],[-8.5327296,6.6129466],[-8.5346808,6.611812],[-8.5370263,6.6111002],[-8.538692,6.6101582],[-8.5402266,6.6089129],[-8.5402131,6.6072622],[-8.5391229,6.6062389],[-8.5368678,6.6053656],[-8.5354983,6.6040465],[-8.5347699,6.6027085],[-8.5339064,6.6000572],[-8.5339848,6.5976416],[-8.5345394,6.5947292],[-8.534381,6.5917387],[-8.5350302,6.5863177],[-8.5346679,6.5840946],[-8.5333216,6.5820883],[-8.5308925,6.5802786],[-8.5305202,6.5794859],[-8.5301361,6.5763245],[-8.5302934,6.575491],[-8.5317816,6.5743959],[-8.532391,6.5726349],[-8.5329719,6.5721626],[-8.5365053,6.5705736],[-8.5382039,6.5692125],[-8.5386602,6.5673892],[-8.5382711,6.5651173],[-8.538741,6.5638849],[-8.5399433,6.5626633],[-8.5408731,6.5603335],[-8.5417687,6.5596611],[-8.5426007,6.55959],[-8.5449624,6.5600531],[-8.5466787,6.5607225],[-8.5474864,6.5620575],[-8.5486266,6.5645787],[-8.5490761,6.5657507],[-8.5495833,6.5667866],[-8.5510431,6.5670681],[-8.5536627,6.566355],[-8.5555294,6.5661062],[-8.5573444,6.5664528],[-8.5619808,6.5701387],[-8.562813,6.5703861],[-8.5634618,6.5701505],[-8.5636458,6.5695663],[-8.5642765,6.5671406],[-8.566266,6.5647781],[-8.5670874,6.5628924],[-8.5677457,6.5605163],[-8.5685203,6.5591159],[-8.5693973,6.557407],[-8.5691112,6.5567412],[-8.5671833,6.5548182],[-8.5661144,6.554731],[-8.5641771,6.5547761],[-8.5630171,6.5553161],[-8.560868,6.5563746],[-8.5602202,6.5565986],[-8.5592145,6.556401],[-8.5576591,6.5547056],[-8.5561823,6.5525451],[-8.5565669,6.5505699],[-8.5582947,6.5480204],[-8.5591417,6.5474058],[-8.5597979,6.547265],[-8.5613273,6.5472229],[-8.5631563,6.5465117],[-8.5644074,6.5452073],[-8.5654985,6.5432807],[-8.5662027,6.5419447],[-8.5681836,6.5403254],[-8.5685885,6.5392441],[-8.5686438,6.5371351],[-8.568956,6.5335144],[-8.5688499,6.5304057],[-8.5691411,6.529843],[-8.5704261,6.5292176],[-8.5710004,6.5284906],[-8.57109,6.5273183],[-8.5711429,6.5246779],[-8.5714517,6.52305],[-8.5726566,6.5221586],[-8.5743872,6.5214417],[-8.5758768,6.5214815],[-8.5789908,6.5220642],[-8.5821823,6.5221276],[-8.5828316,6.5224694],[-8.5829904,6.5230764],[-8.5829516,6.524171],[-8.5832765,6.5255519],[-8.5843012,6.5264251],[-8.5863695,6.5277533],[-8.5871669,6.5279232],[-8.5896953,6.5281744],[-8.5913801,6.5276828],[-8.5936993,6.5266097],[-8.5957408,6.5255159],[-8.5964472,6.5242221],[-8.5977581,6.5221518],[-8.5986966,6.5202663],[-8.5980336,6.5162872],[-8.5982027,6.5147371],[-8.5989264,6.5129046],[-8.6004181,6.5106566],[-8.6006642,6.5085472],[-8.60079,6.5066307],[-8.6014675,6.5054445],[-8.6019503,6.5048077],[-8.6030044,6.5038925],[-8.6068485,6.5023256],[-8.6084974,6.50115],[-8.6100659,6.499868],[-8.6168222,6.4952858],[-8.6184978,6.4932668],[-8.62039,6.4919757],[-8.6212245,6.4912132],[-8.621668,6.4900246],[-8.6214985,6.4881034],[-8.6211362,6.4873086],[-8.619815,6.4862826],[-8.6187455,6.4852297],[-8.6181703,6.4835198],[-8.6180749,6.480902],[-8.6178084,6.4795002],[-8.61577,6.4765684],[-8.6150263,6.4739101],[-8.6146974,6.4721526],[-8.6147079,6.4708135],[-8.6151121,6.4697733],[-8.6169151,6.4680791],[-8.6173511,6.46698],[-8.6187084,6.4653046],[-8.6187084,6.4645673],[-8.6184314,6.463568],[-8.6192493,6.4622306],[-8.6202755,6.4607636],[-8.6212466,6.460293],[-8.6235149,6.4606808],[-8.6245984,6.4604482],[-8.6259431,6.4596194],[-8.6268633,6.4585457],[-8.6278751,6.4553832],[-8.6280971,6.4530343],[-8.6279146,6.4520497],[-8.6262904,6.4495218],[-8.6261724,6.4480691],[-8.6263893,6.447188],[-8.6275781,6.4452279],[-8.6284942,6.4436061],[-8.6307487,6.4413792],[-8.632415,6.4394862],[-8.6331574,6.437724],[-8.633824,6.4369411],[-8.6352995,6.436428],[-8.6361862,6.4369235],[-8.637422,6.4373606],[-8.6387236,6.4369643],[-8.6400153,6.4360603],[-8.6407895,6.434704],[-8.6410823,6.4332913],[-8.6404607,6.4311708],[-8.6401148,6.4296746],[-8.6405568,6.4288791],[-8.6423677,6.4282202],[-8.6439761,6.4263131],[-8.6466624,6.4241913],[-8.6474261,6.4228867],[-8.6479484,6.4214749],[-8.6477372,6.4206883],[-8.6460875,6.41973],[-8.644535,6.4187282],[-8.6439858,6.4174426],[-8.6437295,6.4161219],[-8.6443833,6.4154661],[-8.6464366,6.4138986],[-8.6487466,6.4126146],[-8.6504157,6.4108845],[-8.650652,6.4098386],[-8.6498089,6.4091055],[-8.6491265,6.4082079],[-8.6494443,6.407201],[-8.6518172,6.4052154],[-8.6549774,6.4001984],[-8.6551087,6.3995223],[-8.6543598,6.3982612],[-8.6527625,6.3960023],[-8.6536057,6.3910754],[-8.6531934,6.3890061],[-8.65339,6.3877966],[-8.6539378,6.3828851],[-8.6536685,6.3801714],[-8.6521812,6.3770077],[-8.6520396,6.3757608],[-8.6524827,6.3749399],[-8.6532544,6.3741108],[-8.6532606,6.3725396],[-8.6528849,6.371323],[-8.6530675,6.3704385],[-8.6562479,6.3658182],[-8.659056,6.3638416],[-8.6606309,6.3602829],[-8.6618226,6.35874],[-8.6622915,6.3572748],[-8.6625191,6.3557976],[-8.663969,6.3545913],[-8.6652428,6.3540437],[-8.6660429,6.3530119],[-8.6663801,6.3510425],[-8.6666967,6.347523],[-8.668112,6.3451816],[-8.6694233,6.3446023],[-8.6713312,6.3424244],[-8.6720426,6.3413429],[-8.673152,6.340648],[-8.6739092,6.340344],[-8.6750074,6.3400735],[-8.6759761,6.3402221],[-8.6772286,6.3425814],[-8.6786191,6.344313],[-8.6791996,6.3445213],[-8.6799669,6.3443465],[-8.6803315,6.3439514],[-8.6801904,6.3429389],[-8.6802056,6.3421823],[-8.680635,6.3396523],[-8.681808,6.336388],[-8.6823669,6.3344002],[-8.6822141,6.3338826],[-8.6824706,6.3335506],[-8.6834586,6.3336997],[-8.6845247,6.3332478],[-8.6863506,6.3316325],[-8.6864123,6.3290441],[-8.685912,6.3275243],[-8.6853738,6.3265311],[-8.6847477,6.3246186],[-8.6848072,6.3236586],[-8.6855747,6.3231272],[-8.6864612,6.3222236],[-8.687479,6.3200318],[-8.6879484,6.3191554],[-8.6881578,6.3181637],[-8.6889652,6.3168313],[-8.6899648,6.3158532],[-8.6909232,6.3142403],[-8.6961413,6.3075966],[-8.696673,6.3063402],[-8.698893,6.3030048],[-8.7013167,6.3024214],[-8.7023833,6.3020785],[-8.7026583,6.3015639],[-8.7028039,6.3004754],[-8.7037942,6.3001843],[-8.7043213,6.2996627],[-8.7058488,6.3002357],[-8.707203,6.3001242],[-8.7089728,6.2990142],[-8.7091837,6.2983663],[-8.709909,6.2979678],[-8.7108019,6.2964051],[-8.7115367,6.2945045],[-8.7121752,6.2933485],[-8.7130922,6.2930257],[-8.7135938,6.2924474],[-8.7135739,6.2915744],[-8.7128037,6.2903303],[-8.712691,6.2894342],[-8.7132039,6.2876781],[-8.7136476,6.2871869],[-8.7154652,6.2858842],[-8.7158409,6.2845697],[-8.7165505,6.2805854],[-8.7177517,6.2788986],[-8.7199222,6.2769512],[-8.7208749,6.2757916],[-8.7211691,6.2739272],[-8.7203167,6.2659874],[-8.7206206,6.2627786],[-8.722016,6.2613158],[-8.7239908,6.2606882],[-8.7255639,6.2603769],[-8.7270309,6.259617],[-8.7273825,6.2590652],[-8.7275165,6.2583186],[-8.72742,6.2569536],[-8.7272053,6.2554657],[-8.7259283,6.2534567],[-8.7253333,6.2506986],[-8.7255987,6.2488534],[-8.7256068,6.2475284],[-8.7264567,6.2452787],[-8.727278,6.2432804],[-8.7279168,6.2426567],[-8.7295202,6.2415992],[-8.7297012,6.2414798],[-8.7302169,6.2409977],[-8.7302346,6.2406135],[-8.7302541,6.2399749],[-8.7300742,6.237455],[-8.7305254,6.2362285],[-8.7326304,6.2343377],[-8.7357056,6.2315753],[-8.7413059,6.2248939],[-8.7431354,6.2218161],[-8.742861,6.2194212],[-8.744268,6.2177317],[-8.7443735,6.2174532],[-8.7444016,6.2170905],[-8.7444969,6.2168799],[-8.7446357,6.2167825],[-8.7448744,6.2160133],[-8.7447511,6.2152105],[-8.7446194,6.214539],[-8.7438605,6.2128673],[-8.7426181,6.2123699],[-8.7422311,6.2114521],[-8.7417343,6.2100959],[-8.7417401,6.2093186],[-8.7424425,6.2088565],[-8.7439504,6.2085725],[-8.7456155,6.2085226],[-8.7464863,6.2085984],[-8.7473767,6.2087317],[-8.7493428,6.2095876],[-8.7501207,6.2096677],[-8.7508823,6.2094703],[-8.7516549,6.2088731],[-8.7521645,6.2080304],[-8.75222,6.2064413],[-8.7520035,6.2045372],[-8.7516709,6.2026173],[-8.7511774,6.2015827],[-8.7506195,6.2005453],[-8.7506224,6.2000469],[-8.7506249,6.1995908],[-8.7509199,6.1990468],[-8.7516977,6.1983535],[-8.7523255,6.1980123],[-8.753012,6.1977562],[-8.7539777,6.197831],[-8.7549888,6.1980389],[-8.7567698,6.1991321],[-8.7573251,6.1991136],[-8.7577247,6.1990121],[-8.7595915,6.1983616],[-8.7626408,6.1969775],[-8.7634187,6.1967748],[-8.7645613,6.1966895],[-8.7657683,6.1971695],[-8.767206,6.1983134],[-8.7678738,6.1988174],[-8.7687348,6.1990014],[-8.7699257,6.1987774],[-8.7708913,6.1984121],[-8.7719427,6.1973882],[-8.772447,6.1967482],[-8.7727555,6.1959349],[-8.7734267,6.1949509],[-8.7742474,6.1943643],[-8.7750789,6.1941643],[-8.777945,6.1937694],[-8.7787534,6.1937929],[-8.7802081,6.192629],[-8.7807223,6.1914877],[-8.7807392,6.1914275],[-8.7815196,6.1889835],[-8.7822053,6.1884214],[-8.7830115,6.1881313],[-8.7839907,6.187712],[-8.7845165,6.1876769],[-8.7854384,6.1874919],[-8.785554,6.1873983],[-8.786349,6.1875845],[-8.7866071,6.1875421],[-8.7876329,6.1883529],[-8.7888427,6.1895436],[-8.7899988,6.1905753],[-8.7904644,6.1912461],[-8.790726,6.1916827],[-8.7908691,6.1921697],[-8.7908154,6.1930443],[-8.7904953,6.1933992],[-8.7903732,6.1936841],[-8.7910835,6.1964745],[-8.7915666,6.1965162],[-8.7919131,6.1963474],[-8.7922762,6.1952119],[-8.7934971,6.195241],[-8.7945709,6.1945004],[-8.796254,6.1938477],[-8.7992107,6.1925272],[-8.8004618,6.1913886],[-8.8011921,6.1901896],[-8.8011206,6.1885311],[-8.801138,6.1865496],[-8.8014988,6.1851147],[-8.8023284,6.1830481],[-8.8034181,6.1809906],[-8.8039706,6.1786874],[-8.8048632,6.1760718],[-8.8050043,6.1741088],[-8.8049107,6.1715046],[-8.8050493,6.1703108],[-8.8056437,6.1694471],[-8.8064175,6.1690398],[-8.8074202,6.1690398],[-8.81172,6.1717348],[-8.8124977,6.1719281],[-8.8130908,6.1715349],[-8.8136547,6.1700402],[-8.8156107,6.1679103],[-8.8170518,6.166801],[-8.8192399,6.1660142],[-8.8210088,6.1656902],[-8.8225345,6.1657362],[-8.8234943,6.166327],[-8.8256379,6.1703577],[-8.8266682,6.1743627],[-8.8275221,6.1754473],[-8.8292222,6.1765742],[-8.8303764,6.1767654],[-8.8314398,6.1759965],[-8.8316769,6.1742988],[-8.8320041,6.1685367],[-8.8324636,6.1674862],[-8.8333389,6.1667991],[-8.8348401,6.1660529],[-8.835742,6.1650618],[-8.8361247,6.1640154],[-8.8357917,6.1625963],[-8.8351726,6.1616968],[-8.8321925,6.1604809],[-8.8308193,6.1595636],[-8.8294814,6.1586983],[-8.8226779,6.1549478],[-8.8223168,6.1543196],[-8.8222269,6.1535153],[-8.8234362,6.1522667],[-8.8241377,6.1497092],[-8.8247703,6.1491252],[-8.8256334,6.1490349],[-8.8306349,6.1504291],[-8.8320971,6.1506167],[-8.83399,6.1502403],[-8.8359667,6.1485091],[-8.8376113,6.1468739],[-8.8380392,6.1460229],[-8.8389771,6.140894],[-8.8391643,6.1272132],[-8.8394444,6.1243819],[-8.8399554,6.1226725],[-8.8408353,6.1214294],[-8.8417557,6.120743],[-8.8427106,6.1205622],[-8.8435274,6.1209682],[-8.8442149,6.1218797],[-8.8445416,6.1238753],[-8.8453899,6.1256558],[-8.8466194,6.1270664],[-8.8476705,6.1274465],[-8.8494218,6.1273523],[-8.8521135,6.1260847],[-8.8525471,6.1252225],[-8.8525954,6.1241667],[-8.8521018,6.1236759],[-8.8500844,6.1232094],[-8.8488827,6.1224281],[-8.8480031,6.1212313],[-8.8463635,6.1168063],[-8.8453235,6.1158663],[-8.8438657,6.1147441],[-8.8425593,6.1142338],[-8.8419622,6.1135944],[-8.8410327,6.1120694],[-8.8396292,6.1066269],[-8.838502,6.1045252],[-8.8352539,6.0999074],[-8.8347321,6.0989996],[-8.8347321,6.0981301],[-8.8357415,6.0978791],[-8.8396349,6.0987978],[-8.8415649,6.0991948],[-8.8431822,6.0988598],[-8.8444185,6.0978137],[-8.8458446,6.0945768],[-8.8451644,6.0905539],[-8.8440574,6.0882561],[-8.844207,6.0819101],[-8.8434263,6.0797423],[-8.843996,6.0763437],[-8.8441158,6.0735355],[-8.8458144,6.0717812],[-8.8470114,6.0691319],[-8.8476887,6.0668049],[-8.8470673,6.0646998],[-8.8481583,6.0633765],[-8.848685,6.0620494],[-8.8494668,6.0605778],[-8.8498981,6.0581147],[-8.8500751,6.0566008],[-8.8505933,6.0541863],[-8.8507452,6.0517133],[-8.8528625,6.0471734],[-8.8535262,6.0442032],[-8.8539221,6.0393454],[-8.8553626,6.0375873],[-8.8610546,6.0342964],[-8.8621169,6.0329099],[-8.8629667,6.0321299],[-8.8644014,6.0316111],[-8.8661732,6.031872],[-8.8690249,6.0325976],[-8.8715576,6.0323324],[-8.8748671,6.0306868],[-8.877315,6.0303579],[-8.8836385,6.0282517],[-8.8860956,6.0275928],[-8.888092,6.0274661],[-8.8910132,6.0278749],[-8.8930489,6.0269959],[-8.8948885,6.0263939],[-8.8960428,6.0250124],[-8.8966172,6.0237702],[-8.8976858,6.0230114],[-8.8990362,6.0225726],[-8.9034155,6.0223741],[-8.9069532,6.0232475],[-8.9079143,6.0230142],[-8.9085276,6.0222049],[-8.9087191,6.0203474],[-8.9092698,6.019284],[-8.9099768,6.0188213],[-8.9112901,6.0187092],[-8.9131569,6.0186913],[-8.9167379,6.019378],[-8.9187157,6.0206459],[-8.9212663,6.0188859],[-8.9228219,6.018691],[-8.9247508,6.0188475],[-8.9260265,6.0196919],[-8.9281747,6.0206593],[-8.9293079,6.0206344],[-8.9308223,6.0201869],[-8.9316693,6.0197612],[-8.9318971,6.0191302],[-8.931621,6.018548],[-8.929412,6.0171495],[-8.9286265,6.015725],[-8.9284407,6.0136003],[-8.9286424,6.0106841],[-8.9292689,6.0097352],[-8.9304941,6.0094277],[-8.9324547,6.0093156],[-8.9336465,6.0099636],[-8.9361654,6.0136284],[-8.9373011,6.0150402],[-8.9385514,6.0152793],[-8.9394038,6.0148365],[-8.9397848,6.0144348],[-8.9446546,6.0122452],[-8.9466638,6.0108046],[-8.9488042,6.0099081],[-8.9500807,6.0089519],[-8.9504982,6.0077281],[-8.9503322,6.0068206],[-8.9477023,6.0048668],[-8.9462421,6.004469],[-8.9426428,6.0054889],[-8.9405197,6.0054007],[-8.9399782,6.0050093],[-8.9400233,6.0031886],[-8.9383409,5.9995083],[-8.9370704,5.9964229],[-8.936621,5.9955503],[-8.9296361,5.9905052],[-8.9261126,5.9884173],[-8.9256406,5.9876064],[-8.926413,5.986582],[-8.9260822,5.9856747],[-8.9253916,5.9844849],[-8.9230471,5.9815153],[-8.9224005,5.980756],[-8.9217245,5.9811375],[-8.9201903,5.9819938],[-8.9176369,5.9817377],[-8.9156537,5.9803938],[-8.9152765,5.9800304],[-8.9139891,5.9783231],[-8.9134027,5.9765688],[-8.9136057,5.9759996],[-8.9136672,5.9757622],[-8.9140427,5.9749913],[-8.9149976,5.9747805],[-8.916285,5.9753781],[-8.9183879,5.9769146],[-8.9204049,5.9768719],[-8.9217996,5.9758476],[-8.9231426,5.9744579],[-8.924292,5.9718146],[-8.9252408,5.9697658],[-8.928014,5.9657512],[-8.9279997,5.9641072],[-8.9274744,5.9623487],[-8.9262208,5.9604135],[-8.9263731,5.9599765],[-8.928444,5.9584603],[-8.9318782,5.9550495],[-8.9329356,5.9530601],[-8.934626,5.9490701],[-8.9361023,5.9484163],[-8.9375446,5.9471192],[-8.941182,5.9445712],[-8.9461665,5.9408444],[-8.9474314,5.939678],[-8.9483961,5.9385256],[-8.9487408,5.9373284],[-8.9479918,5.9362008],[-8.9476238,5.9363101],[-8.9449827,5.938538],[-8.9442513,5.938681],[-8.9436519,5.9380729],[-8.9439157,5.9373695],[-8.945714,5.9358669],[-8.9470496,5.9335518],[-8.9473972,5.9321773],[-8.9474734,5.9308114],[-8.9469314,5.9296715],[-8.9467409,5.9288282],[-8.9450742,5.9279411],[-8.9436584,5.9279889],[-8.9414292,5.9290237],[-8.9387984,5.9281682],[-8.9373064,5.9267364],[-8.9373984,5.9259043],[-8.937333,5.9251886],[-8.9371007,5.9219457],[-8.9383086,5.9195043],[-8.9407789,5.9144005],[-8.9414415,5.9117566],[-8.9411726,5.9105754],[-8.9384374,5.9068049],[-8.93798,5.9048301],[-8.9373001,5.9046705],[-8.9364633,5.9045424],[-8.9340815,5.9044998],[-8.9330301,5.9048413],[-8.9313349,5.9067622],[-8.9296612,5.9085124],[-8.9291488,5.9096196],[-8.9291391,5.9142169],[-8.9289557,5.9181783],[-8.9279545,5.9217748],[-8.9251122,5.9247334],[-8.9232239,5.9262059],[-8.9211425,5.9266541],[-8.9191915,5.9267448],[-8.9177093,5.925715],[-8.9168397,5.9253947],[-8.9154235,5.9247803],[-8.909727,5.9228765],[-8.908107,5.9223033],[-8.9072889,5.9217752],[-8.90679,5.9208973],[-8.9064816,5.9202518],[-8.9062965,5.9196088],[-8.9064199,5.9186377],[-8.9069483,5.9178854],[-8.9078468,5.9171249],[-8.9088848,5.9165781],[-8.9096707,5.916402],[-8.9108455,5.9162019],[-8.9121705,5.9162392],[-8.9133078,5.9167088],[-8.9140588,5.917125],[-8.9153034,5.9181602],[-8.9157915,5.9186723],[-8.9160866,5.9188591],[-8.916328,5.9189285],[-8.9167893,5.9188858],[-8.9170522,5.9186937],[-8.9175832,5.9168902],[-8.9178944,5.9158337],[-8.9182591,5.9147398],[-8.9181197,5.9139341],[-8.9175832,5.9135285],[-8.9155877,5.9129843],[-8.9143002,5.9126642],[-8.9116019,5.9129096],[-8.9094722,5.9130751],[-8.9063609,5.9128936],[-8.9051217,5.9129469],[-8.9042474,5.9132084],[-8.9036466,5.9134432],[-8.9029653,5.913822],[-8.9011038,5.9151773],[-8.8995427,5.9160257],[-8.8977153,5.9168125],[-8.8963208,5.9159887],[-8.8957338,5.9142484],[-8.8959189,5.9133334],[-8.8987581,5.9063194],[-8.899355,5.9035077],[-8.8998271,5.9026859],[-8.9003946,5.9020638],[-8.9013721,5.9015547],[-8.9028634,5.9011812],[-8.9050628,5.9008184],[-8.9061357,5.9002634],[-8.9069738,5.8994638],[-8.9073822,5.8976216],[-8.907473,5.8960016],[-8.9076004,5.8925515],[-8.9081664,5.8905492],[-8.9087901,5.8879274],[-8.9086954,5.8863722],[-8.9076941,5.8855544],[-8.9063509,5.8847124],[-8.9045017,5.8838952],[-8.900366,5.8834307],[-8.8966148,5.8824898],[-8.8920421,5.8813914],[-8.8909591,5.8801663],[-8.89149,5.8790326],[-8.8920917,5.878075],[-8.8934436,5.8771738],[-8.8966785,5.875681],[-8.8986887,5.874477],[-8.9001186,5.8725547],[-8.9023341,5.8690059],[-8.9033472,5.8672869],[-8.9048761,5.8666321],[-8.9070423,5.8653401],[-8.9083304,5.8635198],[-8.9085642,5.8619271],[-8.9079198,5.8608159],[-8.9063413,5.8590275],[-8.9052725,5.8571544],[-8.9056052,5.8558799],[-8.9067023,5.855387],[-8.9087092,5.8541886],[-8.9097885,5.8539998],[-8.9105884,5.8543026],[-8.9118879,5.8555715],[-8.9125137,5.8570417],[-8.9142904,5.8580275],[-8.9162228,5.8574994],[-8.9167485,5.8557552],[-8.9169868,5.8543804],[-8.9162936,5.849782],[-8.917235,5.8489018],[-8.918594,5.848261],[-8.9200026,5.8470498],[-8.9199801,5.8455024],[-8.9196275,5.8443811],[-8.9190683,5.8432615],[-8.9192523,5.8421418],[-8.919769,5.8416067],[-8.9203495,5.8416137],[-8.9208888,5.841982],[-8.9211635,5.8420362],[-8.9225933,5.8423813],[-8.9239736,5.8420925],[-8.9251345,5.8414377],[-8.9255309,5.8403744],[-8.9262529,5.8381351],[-8.926813,5.8352078],[-8.9265289,5.8339805],[-8.9254534,5.8306226],[-8.9261578,5.8293809],[-8.9267342,5.8283049],[-8.9298699,5.828333],[-8.9333737,5.8277345],[-8.9354831,5.8257346],[-8.936743,5.8250515],[-8.9387958,5.8245375],[-8.9409759,5.8231573],[-8.9418466,5.8229601],[-8.9424411,5.8230446],[-8.9427634,5.8230974],[-8.9425402,5.8268613],[-8.9416767,5.8285232],[-8.9394541,5.8314173],[-8.9382507,5.8332412],[-8.9382861,5.8337834],[-8.9383357,5.8353678],[-8.945683,5.8351847],[-8.9477075,5.8345861],[-8.9487834,5.833727],[-8.9499018,5.8329172],[-8.9509635,5.8329524],[-8.9525703,5.8329172],[-8.9538444,5.8335228],[-8.955161,5.8340862],[-8.9565201,5.8349875],[-8.9587144,5.8350298],[-8.9604981,5.8344171],[-8.9613688,5.8344242],[-8.9623243,5.8345368],[-8.9640989,5.8358083],[-8.9665738,5.8366492],[-8.9680301,5.8370999],[-8.9692907,5.8371456],[-8.9734981,5.8365268],[-8.9760789,5.8368191],[-8.9774608,5.8369264],[-8.9786622,5.8366986],[-8.9793676,5.8360926],[-8.9798749,5.8333591],[-8.9821819,5.8307622],[-8.9838311,5.8293238],[-8.9839836,5.828295],[-8.9835767,5.8272661],[-8.9844085,5.8260581],[-8.9858271,5.8245335],[-8.9876754,5.8240234],[-8.9894261,5.8240277],[-8.9906976,5.8235891],[-8.9913309,5.822644],[-8.9925483,5.8221758],[-8.9944953,5.8222938],[-8.9955254,5.8229996],[-8.9966808,5.8241839],[-8.9978864,5.8270131],[-8.9988167,5.8284113],[-9.0005246,5.8294663],[-9.0033842,5.8310053],[-9.0047315,5.8322069],[-9.0062837,5.834738],[-9.0080846,5.8361314],[-9.0097575,5.836664],[-9.0116959,5.8364645],[-9.0135753,5.8355297],[-9.0148381,5.8318273],[-9.0164212,5.8288084],[-9.01787,5.8273016],[-9.0195755,5.8259313],[-9.0211606,5.8258656],[-9.0233492,5.8244801],[-9.0251267,5.8240216],[-9.0276463,5.8235599],[-9.0299747,5.8224349],[-9.0322283,5.8204566],[-9.0332746,5.8196758],[-9.0351017,5.8194811],[-9.0370844,5.8202702],[-9.0387597,5.8202702],[-9.0424029,5.8185567],[-9.0437064,5.8183622],[-9.0452755,5.8189475],[-9.0486384,5.8215717],[-9.0493573,5.8226118],[-9.0501507,5.8255719],[-9.0512831,5.8276263],[-9.0528895,5.828958],[-9.0552317,5.8292909],[-9.057497,5.8284956],[-9.0599401,5.8271817],[-9.0613063,5.8270523],[-9.062399,5.8275639],[-9.063386,5.8307712],[-9.0651085,5.8348577],[-9.0689489,5.8418399],[-9.069559,5.842784],[-9.0705951,5.8428527],[-9.071939,5.8418499],[-9.0733288,5.8400065],[-9.0758374,5.838102],[-9.079417,5.8355961],[-9.0804845,5.8341358],[-9.0821398,5.8298545],[-9.0835715,5.8291562],[-9.0848504,5.8288033],[-9.0854794,5.8288591],[-9.087341,5.8297849],[-9.0891381,5.8302944],[-9.0923683,5.8290248],[-9.0936115,5.8289076],[-9.0946699,5.8294467],[-9.0960678,5.829785],[-9.0959545,5.8314012],[-9.097428,5.8318147],[-9.0976547,5.8346337],[-9.0973524,5.8360244],[-9.0956144,5.8373399],[-9.0936498,5.8386179],[-9.0931208,5.8404972],[-9.0918362,5.8423765],[-9.090136,5.8431282],[-9.0895315,5.8446692],[-9.0885491,5.8455337],[-9.0873401,5.8446692],[-9.08632,5.845872],[-9.0834485,5.8468116],[-9.0820506,5.8488037],[-9.0820884,5.8510964],[-9.0827685,5.8528629],[-9.0815216,5.8566214],[-9.0815594,5.8592524],[-9.0824662,5.863086],[-9.0830329,5.8641384],[-9.0846198,5.8630484],[-9.0861311,5.8644391],[-9.085451,5.8662431],[-9.0800481,5.8685358],[-9.0784991,5.8714298],[-9.0743808,5.8743613],[-9.074343,5.8761277],[-9.0748342,5.8782324],[-9.0738141,5.8795854],[-9.0722272,5.880525],[-9.0712071,5.8819908],[-9.071396,5.8840955],[-9.0729829,5.8873275],[-9.0769122,5.8909355],[-9.0797459,5.8930777],[-9.0836752,5.9009324],[-9.0846546,5.9024702],[-9.0856483,5.903239],[-9.0874702,5.9029644],[-9.0882431,5.904502],[-9.0879671,5.9054905],[-9.0900097,5.9067535],[-9.0913347,5.907083],[-9.0931013,5.9056003],[-9.0947024,5.9065339],[-9.0944815,5.9077969],[-9.0931013,5.9093345],[-9.0926597,5.9129039],[-9.0918868,5.914716],[-9.092218,5.916638],[-9.092218,5.9180108],[-9.095144,5.9207565],[-9.096745,5.9241062],[-9.0966898,5.9253692],[-9.0958065,5.9271264],[-9.0956961,5.9287188],[-9.0929909,5.9306957],[-9.0902306,5.9315742],[-9.0896233,5.9327274],[-9.0921076,5.9355279],[-9.0917764,5.9376145],[-9.0865317,5.9351435],[-9.0845442,5.9349239],[-9.0785818,5.9371203],[-9.0765943,5.9393168],[-9.0756558,5.9416779],[-9.0762631,5.9432153],[-9.0759319,5.9444234],[-9.0764839,5.9454118],[-9.0773672,5.9449725],[-9.0788026,5.9437095],[-9.0811766,5.9444234],[-9.0837713,5.9457961],[-9.0847098,5.9478827],[-9.0880789,5.9496058],[-9.0893606,5.94968],[-9.0903962,5.9500242],[-9.0917764,5.9530443],[-9.0909483,5.9554054],[-9.0915426,5.9574923],[-9.0949232,5.9591941],[-9.0962482,5.9611708],[-9.096745,5.9633123],[-9.0979596,5.9644105],[-9.0995606,5.964685],[-9.1013824,5.9655635],[-9.103922,5.9649046],[-9.1057901,5.9680202],[-9.1057288,5.9681366],[-9.1045695,5.9685759],[-9.103907,5.9711017],[-9.104459,5.9730235],[-9.1031893,5.9733529],[-9.102582,5.9743961],[-9.1015883,5.9740118],[-9.1014778,5.9730784],[-9.1006497,5.9728038],[-9.0996008,5.9751649],[-9.0998216,5.9764826],[-9.1016435,5.9766474],[-9.1029132,5.9776357],[-9.1003185,5.979228],[-9.0997341,5.9814792],[-9.099932,5.9848834],[-9.0999518,5.988094],[-9.0975336,5.9910614],[-9.0959357,5.9907213],[-9.0935052,5.9880736],[-9.0896146,5.987468],[-9.0872343,5.9860913],[-9.0871072,5.9851955],[-9.0849463,5.9850292],[-9.082523,5.9854913],[-9.0811352,5.9858259],[-9.0807275,5.9884686],[-9.0795957,5.9881633],[-9.0777514,5.9867725],[-9.0765148,5.9869342],[-9.0754459,5.9878359],[-9.0751991,5.9916918],[-9.0725492,5.9935586],[-9.0712794,5.9939978],[-9.0717211,5.9960293],[-9.0690711,5.9974019],[-9.0681878,5.9988295],[-9.0680774,6.0003668],[-9.0690159,6.0010257],[-9.0690711,6.0027277],[-9.0721627,6.0037709],[-9.0753096,6.0036062],[-9.0763585,6.0045945],[-9.0777939,6.0098104],[-9.0798918,6.0112379],[-9.0845292,6.0132144],[-9.085436,6.0143247],[-9.0870655,6.0157828],[-9.0873886,6.0161172],[-9.087968,6.0170562],[-9.0887891,6.0182808],[-9.090878,6.0207362],[-9.095129,6.0233166],[-9.0958859,6.0239488],[-9.0959445,6.0249148],[-9.0944287,6.0265082],[-9.0930307,6.0275578],[-9.0913163,6.0280758],[-9.0902612,6.0291864],[-9.0904268,6.0306139],[-9.0892674,6.0323159],[-9.0867831,6.0331943],[-9.0847124,6.0334903],[-9.0841484,6.0341914],[-9.0837622,6.035173],[-9.0831946,6.0371472],[-9.0809311,6.0367629],[-9.0800715,6.0373495],[-9.0796184,6.0379342],[-9.0794622,6.0404779],[-9.0791645,6.0424725],[-9.0791093,6.0444489],[-9.0779499,6.0462606],[-9.0756864,6.04659],[-9.0748031,6.0477978],[-9.0718219,6.0463704],[-9.0708834,6.0475782],[-9.071325,6.0491154],[-9.0728708,6.0505977],[-9.0717115,6.0532329],[-9.0716563,6.0546603],[-9.0727604,6.0565269],[-9.0730917,6.059162],[-9.0766249,6.0606992],[-9.0789879,6.0661239],[-9.0792275,6.0674257],[-9.0796531,6.0678736],[-9.0801788,6.0678629],[-9.0808655,6.0678949],[-9.0816633,6.0683663],[-9.0818839,6.0691041],[-9.0820077,6.069925],[-9.0813728,6.0708005],[-9.0815936,6.0731062],[-9.0832813,6.0749822],[-9.0845776,6.0755398],[-9.0886697,6.0761722],[-9.0896752,6.0771044],[-9.0935324,6.0781789],[-9.094711,6.0787225],[-9.0955563,6.0795398],[-9.0956365,6.0803571],[-9.0956632,6.0819783],[-9.0958637,6.0826893],[-9.0957434,6.0834733],[-9.0962913,6.0848222],[-9.096719,6.086377],[-9.0968994,6.0872673],[-9.0966054,6.0879849],[-9.0953558,6.0899384],[-9.0945573,6.0909483],[-9.0940294,6.0919982],[-9.0935884,6.0938652],[-9.0937822,6.0947489],[-9.0926796,6.0972804],[-9.0906883,6.0991275],[-9.0888774,6.1000976],[-9.0886369,6.1013335],[-9.0883963,6.102164],[-9.0885166,6.1025893],[-9.0890244,6.103081],[-9.0921717,6.1048484],[-9.0926328,6.1059047],[-9.0925927,6.1065828],[-9.0928766,6.1072394],[-9.0914197,6.1089276],[-9.0913396,6.1103157],[-9.0906313,6.1134983],[-9.0905242,6.1150274],[-9.0908183,6.1160231],[-9.0917739,6.1167683],[-9.0917339,6.1173719],[-9.0899829,6.118343],[-9.0892815,6.1180962],[-9.0889337,6.118157],[-9.0887469,6.1185413],[-9.0893414,6.1192201],[-9.0888201,6.1199111],[-9.0877913,6.1205744],[-9.0877977,6.1210474],[-9.0882791,6.1224879],[-9.0898927,6.1234128],[-9.0921882,6.1249876],[-9.0946541,6.1260906],[-9.0963649,6.1275191],[-9.0981692,6.128755],[-9.0990981,6.1302367],[-9.1007286,6.1315124],[-9.1023659,6.1326951],[-9.1042504,6.1338313],[-9.1054265,6.1342699],[-9.1064557,6.1342233],[-9.1070771,6.1348612],[-9.1073645,6.1361635],[-9.1089951,6.1355589],[-9.1100442,6.1348678],[-9.1130113,6.1341901],[-9.1141741,6.1341303],[-9.1142677,6.1344891],[-9.1136996,6.1351934],[-9.1138868,6.1358911],[-9.1150429,6.136808],[-9.1163126,6.1372067],[-9.1178563,6.1372665],[-9.1185446,6.1389741],[-9.1198811,6.14019],[-9.1204558,6.141552],[-9.1209035,6.1428942],[-9.1229217,6.1450802],[-9.1237169,6.1456316],[-9.1241513,6.1466548],[-9.1251604,6.1477711],[-9.1248129,6.1485817],[-9.1242983,6.1491331],[-9.1237303,6.1491132],[-9.1230888,6.148482],[-9.1223203,6.147605],[-9.1210238,6.1473791],[-9.1197608,6.1479505],[-9.1190591,6.1486747],[-9.1168071,6.1485019],[-9.115103,6.1474189],[-9.1140271,6.1462097],[-9.112303,6.1462429],[-9.1121092,6.1466083],[-9.1122428,6.1478242],[-9.11247,6.1482229],[-9.1127708,6.1493989],[-9.1125168,6.1513324],[-9.1122161,6.1527143],[-9.1121426,6.1549069],[-9.1125302,6.1568603],[-9.1131784,6.1588269],[-9.1124433,6.1593784],[-9.1108662,6.1598701],[-9.1094829,6.1596109],[-9.108427,6.1592322],[-9.1076919,6.1587339],[-9.1059478,6.1586409],[-9.1050055,6.1592721],[-9.1039296,6.1597239],[-9.1027267,6.1592721],[-9.1022255,6.1596508],[-9.1021788,6.1601159],[-9.1024661,6.1605079],[-9.1021988,6.161345],[-9.1032212,6.1625077],[-9.1036155,6.1634911],[-9.1045845,6.1639362],[-9.1053998,6.1637967],[-9.1061883,6.1634512],[-9.1069769,6.1648132],[-9.1073444,6.1664211],[-9.1074246,6.1678495],[-9.1076184,6.1687664],[-9.1076385,6.1696832],[-9.107859,6.1704757],[-9.10826,6.1713195],[-9.1082199,6.1716649],[-9.1071841,6.1721234],[-9.1071106,6.1726682],[-9.1073712,6.173977],[-9.106616,6.1744022],[-9.1054933,6.1745019],[-9.1042571,6.1734322],[-9.1039229,6.1733924],[-9.1036423,6.1739106],[-9.1034418,6.1750135],[-9.1040298,6.1761296],[-9.1048251,6.1769269],[-9.1055134,6.1780497],[-9.1061082,6.178734],[-9.1058542,6.1792124],[-9.1047449,6.1797505],[-9.1035821,6.1805478],[-9.1022723,6.1815709],[-9.1019315,6.1815842],[-9.1014771,6.1813118],[-9.1004413,6.180282],[-9.0999868,6.179724],[-9.0983429,6.1790197],[-9.0975811,6.1783952],[-9.0968326,6.1772923],[-9.0957768,6.1763356],[-9.0953424,6.1754254],[-9.0950417,6.1746016],[-9.0939123,6.1740102],[-9.0927094,6.1740634],[-9.0924956,6.1736448],[-9.0928431,6.1728941],[-9.0935247,6.1727811],[-9.0941462,6.1724755],[-9.0943935,6.1712663],[-9.0943266,6.1706152],[-9.0937185,6.1704092],[-9.0928565,6.1705953],[-9.0912459,6.17312],[-9.0906044,6.1739372],[-9.0905376,6.1746016],[-9.0913595,6.1752859],[-9.090865,6.176402],[-9.0906378,6.1781427],[-9.0902703,6.1797505],[-9.0883924,6.1810195],[-9.0878378,6.1811125],[-9.0868087,6.1801292],[-9.0858998,6.1798435],[-9.0853585,6.1801292],[-9.0850444,6.1816839],[-9.0840554,6.1838431],[-9.0831265,6.1856236],[-9.0840755,6.1887329],[-9.0846234,6.1889389],[-9.0853786,6.1884007],[-9.086127,6.1885004],[-9.0865347,6.1888326],[-9.0866616,6.1906729],[-9.0870025,6.1918089],[-9.0875838,6.1924201],[-9.0882254,6.1929649],[-9.088212,6.193709],[-9.0877576,6.1950643],[-9.0877041,6.1958948],[-9.0871361,6.1970042],[-9.0864612,6.1965126],[-9.0858798,6.1954629],[-9.0851046,6.1949115],[-9.0843361,6.1944132],[-9.0835475,6.1945461],[-9.0837213,6.1955294],[-9.0844029,6.196413],[-9.0846836,6.1968448],[-9.0838883,6.1989575],[-9.0838282,6.2002995],[-9.0835008,6.2010967],[-9.0823714,6.2013425],[-9.0815895,6.2010037],[-9.0812086,6.1997879],[-9.0808945,6.1990438],[-9.0800258,6.1986718],[-9.0793976,6.1989707],[-9.0792105,6.2003991],[-9.0785289,6.2014222],[-9.0767379,6.2024453],[-9.0757088,6.203309],[-9.0742921,6.2047706],[-9.0728887,6.2059199],[-9.0714787,6.2061989],[-9.0693335,6.2063982],[-9.068398,6.2062521],[-9.0671884,6.2072353],[-9.0663664,6.207521],[-9.0652772,6.2062255],[-9.0631989,6.205302],[-9.0626776,6.2069098],[-9.0620895,6.2084909],[-9.0614747,6.2094741],[-9.0622031,6.2115668],[-9.0627511,6.2129819],[-9.0625239,6.2142574],[-9.0617354,6.215048],[-9.0614413,6.2166357],[-9.0620829,6.2173399],[-9.0637669,6.2194724],[-9.0646557,6.2196983],[-9.0655445,6.2201833],[-9.0658987,6.2212395],[-9.065912,6.2221165],[-9.0668877,6.2228738],[-9.0676696,6.2230731],[-9.067723,6.2235979],[-9.0671884,6.224229],[-9.0648829,6.224787],[-9.063406,6.2245745],[-9.0630318,6.2248269],[-9.0633058,6.2266671],[-9.0639072,6.227152],[-9.0650032,6.2275108],[-9.0662462,6.2269793],[-9.0675626,6.227245],[-9.0675894,6.2278363],[-9.0673488,6.2286268],[-9.0667073,6.2294904],[-9.0669946,6.2305268],[-9.0680638,6.231211],[-9.0687187,6.2312243],[-9.0688457,6.2316362],[-9.0681507,6.2332704],[-9.0680037,6.2335494],[-9.0674022,6.2345459],[-9.0672018,6.235642],[-9.0675292,6.2371234],[-9.0682977,6.2377545],[-9.0680037,6.2382195],[-9.0668142,6.2385783],[-9.0662729,6.2396146],[-9.0656046,6.2396478],[-9.0654242,6.2401261],[-9.0654509,6.2409565],[-9.0651636,6.2416739],[-9.0650366,6.2424246],[-9.0646289,6.2427169],[-9.0635664,6.2428232],[-9.0623769,6.2424844],[-9.0619626,6.2420924],[-9.0622165,6.2414148],[-9.0623435,6.2409764],[-9.0620829,6.2408236],[-9.0616619,6.2411956],[-9.0610805,6.2414215],[-9.0603186,6.2420991],[-9.059911,6.2429294],[-9.0589487,6.2429427],[-9.0586948,6.2426704],[-9.0586881,6.2423449],[-9.0588084,6.2416341],[-9.0583072,6.2412753],[-9.0574451,6.2415012],[-9.0566231,6.2416274],[-9.0563224,6.2420858],[-9.0561687,6.2430689],[-9.0566031,6.2445902],[-9.0571978,6.2457527],[-9.0566031,6.248111],[-9.0568838,6.2500175],[-9.0568437,6.2528407],[-9.0555606,6.2542557],[-9.0562957,6.2552255],[-9.0569172,6.255757],[-9.0574117,6.2559363],[-9.0574384,6.25678],[-9.0572446,6.257318],[-9.0569974,6.2583809],[-9.0572112,6.258826],[-9.0578327,6.2598224],[-9.0579463,6.260759],[-9.0576055,6.2613037],[-9.0578594,6.2619016],[-9.0592093,6.2630508],[-9.0601315,6.263622],[-9.0604857,6.2642996],[-9.0606595,6.2652694],[-9.0610671,6.2671095],[-9.0615549,6.2673885],[-9.0626442,6.2668039],[-9.063112,6.2663456],[-9.0638738,6.2663389],[-9.0654242,6.2669368],[-9.0662462,6.2677472],[-9.0666538,6.2693746],[-9.0673287,6.2695008],[-9.0680171,6.2693348],[-9.0686319,6.2683849],[-9.0697412,6.267694],[-9.0701087,6.2682653],[-9.0699818,6.2689894],[-9.0691798,6.2707231],[-9.0684447,6.2719719],[-9.0684782,6.2731012],[-9.0677431,6.2743832],[-9.0670481,6.2749412],[-9.0657516,6.275446],[-9.0649564,6.2753929],[-9.0637535,6.2748017],[-9.0634127,6.2742437],[-9.063406,6.2734798],[-9.0628647,6.2735529],[-9.06227,6.2749478],[-9.0628046,6.2760704],[-9.062858,6.276821],[-9.0614547,6.2777444],[-9.0609535,6.2774919],[-9.0605191,6.2767413],[-9.059891,6.2766749],[-9.0596571,6.2776049],[-9.0600246,6.2795511],[-9.0610871,6.2813446],[-9.0610871,6.2818096],[-9.0614146,6.2821683],[-9.0630452,6.2823676],[-9.0634662,6.283065],[-9.0644285,6.2832975],[-9.0657516,6.2830517],[-9.0659722,6.2832311],[-9.0660323,6.2840348],[-9.0666337,6.284998],[-9.0666271,6.2858416],[-9.0672552,6.2863663],[-9.0684381,6.2864394],[-9.0689192,6.2868845],[-9.0695674,6.2880867],[-9.0705164,6.2892027],[-9.0713784,6.2897208],[-9.0713517,6.2906574],[-9.0900221,6.3311084],[-9.1665055,6.499229],[-9.1664134,6.4996843],[-9.1652108,6.5076577],[-9.1651423,6.5081129],[-9.159854,6.5170323],[-9.158436,6.5260289],[-9.1583223,6.5276954],[-9.1633254,6.5585158],[-9.1649648,6.5686062],[-9.1654396,6.5715274],[-9.1645166,6.5791157],[-9.1632395,6.5896174],[-9.1620421,6.5994639],[-9.1696921,6.6102228],[-9.1722235,6.6137827],[-9.179203,6.6236271]]]]}]}
