# Supplementary material
Source: ML conference proceedings conference paper supplement (https://proceedings.neurips.cc/paper_files/paper/2022/hash/9d3faa41886997cfc2128b930077fa49-Abstract.html)
Supplement: Supplementary file 1 [file 9d3faa41886997cfc2128b930077fa49-Supplemental-Conference.zip › code/ebola/map/geojson/nzerekore.geojson]

{"type":"GeometryCollection","geometries":[{"type":"MultiPolygon","coordinates":[[[[-10.6854088,8.2865024],[-10.6864161,8.2865403],[-10.6873863,8.2865366],[-10.6888725,8.2862086],[-10.6902494,8.2855596],[-10.6925599,8.2841561],[-10.6953253,8.2830728],[-10.7006355,8.2801129],[-10.7013199,8.2803268],[-10.7017313,8.2811139],[-10.7018579,8.2825943],[-10.7007953,8.2881798],[-10.7010569,8.2904561],[-10.7007921,8.2917637],[-10.7002603,8.2923276],[-10.6989394,8.2923103],[-10.6980224,8.2917907],[-10.6978865,8.2908699],[-10.6972983,8.2904564],[-10.6965632,8.2909382],[-10.6958598,8.2916847],[-10.6956041,8.2937974],[-10.6961286,8.2953973],[-10.6970137,8.2960651],[-10.6987562,8.2973578],[-10.6997102,8.2985019],[-10.7000357,8.2997905],[-10.6994625,8.3011844],[-10.6977352,8.3026553],[-10.6965248,8.3039721],[-10.695364,8.3063044],[-10.6944013,8.3078173],[-10.6941748,8.308896],[-10.6949169,8.3104714],[-10.6965178,8.3117484],[-10.6983087,8.312932],[-10.6982096,8.3137165],[-10.696624,8.3158667],[-10.6965639,8.3159698],[-10.6948615,8.3188854],[-10.6918854,8.3208559],[-10.6906474,8.321688],[-10.689855,8.3228784],[-10.6894158,8.3245382],[-10.6902965,8.3251628],[-10.691579,8.3256327],[-10.6920884,8.3263424],[-10.6919367,8.3274315],[-10.6902567,8.3284891],[-10.6887132,8.3293369],[-10.6883061,8.329981],[-10.6880573,8.3306805],[-10.6878329,8.3324509],[-10.6873649,8.3332214],[-10.6865944,8.3335129],[-10.6860593,8.3342872],[-10.6854725,8.3356933],[-10.6850732,8.3377103],[-10.6836555,8.3402347],[-10.6832371,8.3424215],[-10.6826041,8.3438758],[-10.6808869,8.3460507],[-10.6790313,8.3481113],[-10.6786237,8.3503299],[-10.6785351,8.3512574],[-10.6786102,8.3517988],[-10.6785994,8.352924],[-10.6782776,8.3534547],[-10.6784628,8.3538116],[-10.6792459,8.3557966],[-10.6785852,8.3593428],[-10.6783258,8.3607359],[-10.6786002,8.3608775],[-10.6787223,8.3617469],[-10.6788666,8.3621597],[-10.6791128,8.3624554],[-10.6784467,8.3637574],[-10.6784008,8.3653615],[-10.6786368,8.366086],[-10.6783404,8.3666487],[-10.6780062,8.3685212],[-10.6775971,8.3695619],[-10.6769389,8.3709835],[-10.6765637,8.3739668],[-10.6760681,8.3755774],[-10.6737657,8.3783315],[-10.673342,8.378365],[-10.6694565,8.3784944],[-10.665949,8.3817919],[-10.6649345,8.3832325],[-10.6642194,8.3836702],[-10.6630021,8.3833653],[-10.6619351,8.3824454],[-10.6586325,8.3813395],[-10.6535516,8.3813395],[-10.6492836,8.3825962],[-10.6478304,8.3844859],[-10.6473776,8.3860949],[-10.6473471,8.386831],[-10.647583,8.387053],[-10.6473891,8.3888967],[-10.6451435,8.3891761],[-10.6426816,8.389978],[-10.6411683,8.3914302],[-10.6397123,8.3919001],[-10.6393783,8.3923048],[-10.6393554,8.3926539],[-10.6388735,8.394087],[-10.6391138,8.3953803],[-10.6397314,8.3981282],[-10.6406615,8.3994215],[-10.6408456,8.3998655],[-10.6413404,8.4009298],[-10.6420179,8.4027022],[-10.6426522,8.404806],[-10.6430196,8.4069461],[-10.6447107,8.409538],[-10.6453815,8.4111635],[-10.644914,8.4125538],[-10.6439486,8.4144135],[-10.6442027,8.4181329],[-10.6445055,8.4199437],[-10.6443551,8.4217517],[-10.6479671,8.4233193],[-10.6502605,8.4226122],[-10.6509469,8.4232917],[-10.6507567,8.4245146],[-10.6494162,8.4255259],[-10.646771,8.4258531],[-10.6464383,8.4279338],[-10.6450889,8.4312008],[-10.6446716,8.4338695],[-10.6440877,8.4355625],[-10.6439755,8.4366114],[-10.6444438,8.4379824],[-10.6443841,8.4387091],[-10.6427667,8.4396914],[-10.6411451,8.4412169],[-10.6407476,8.443263],[-10.641539,8.4455091],[-10.6419162,8.4465801],[-10.6421304,8.4480598],[-10.6417226,8.449779],[-10.6408289,8.4505279],[-10.6408214,8.4513602],[-10.6415453,8.4520336],[-10.6417638,8.4529628],[-10.6419381,8.453267],[-10.6419756,8.453939],[-10.6417102,8.4547298],[-10.640589,8.4559538],[-10.6400628,8.4568993],[-10.6406985,8.458621],[-10.6409452,8.4590083],[-10.6413154,8.4593214],[-10.6415246,8.4597193],[-10.6415191,8.4602539],[-10.6414173,8.4605803],[-10.6409506,8.4611427],[-10.6408379,8.4614916],[-10.640795,8.461603],[-10.6408271,8.4617516],[-10.6408969,8.4618895],[-10.6410471,8.4619903],[-10.6413315,8.4620646],[-10.6415031,8.4621654],[-10.6418089,8.4624785],[-10.6419698,8.4627809],[-10.6420287,8.4630515],[-10.6419591,8.4634123],[-10.6417444,8.4637678],[-10.6403538,8.4655277],[-10.6397329,8.4658186],[-10.6390193,8.4660361],[-10.6386922,8.4662059],[-10.6385795,8.4663757],[-10.6385795,8.4667047],[-10.6386599,8.4670337],[-10.6389014,8.4674581],[-10.6392232,8.4678508],[-10.6397274,8.4686944],[-10.6403551,8.4695805],[-10.6407789,8.4699625],[-10.6409559,8.4701323],[-10.6412026,8.4706443],[-10.6416068,8.4730938],[-10.6416069,8.4734891],[-10.6415076,8.4738684],[-10.6411427,8.4745688],[-10.6408934,8.4747598],[-10.6406144,8.4748819],[-10.6400109,8.4750676],[-10.6387368,8.475301],[-10.6366609,8.475232],[-10.6356389,8.4753329],[-10.6346598,8.4755477],[-10.6339304,8.4759735],[-10.6333725,8.4764617],[-10.6325468,8.4777901],[-10.6321553,8.47857],[-10.6319676,8.4788937],[-10.6317423,8.479159],[-10.6316082,8.479419],[-10.6315035,8.4801737],[-10.6315492,8.4804748],[-10.6317477,8.4807932],[-10.6322734,8.4813184],[-10.6336358,8.4821833],[-10.6339363,8.4824273],[-10.6340597,8.4825547],[-10.6341241,8.4826847],[-10.6342528,8.4830799],[-10.6342636,8.4835442],[-10.633931,8.4852102],[-10.6339416,8.488245],[-10.6338895,8.4899933],[-10.633597,8.4905075],[-10.6331414,8.4908085],[-10.6325682,8.490945],[-10.6318787,8.4908229],[-10.6309236,8.4903169],[-10.6284904,8.4886012],[-10.6268736,8.4879534],[-10.6257623,8.4871902],[-10.6249702,8.487002],[-10.6242295,8.4870172],[-10.6231697,8.4875667],[-10.6224856,8.4879381],[-10.622537,8.4884571],[-10.6226913,8.4888641],[-10.6225113,8.4891846],[-10.6220412,8.4895431],[-10.6212407,8.4900139],[-10.6204176,8.4906041],[-10.6201038,8.4911282],[-10.6199328,8.4916886],[-10.6198826,8.4921305],[-10.6199328,8.4924806],[-10.6201491,8.4929958],[-10.6203291,8.4931459],[-10.6205194,8.4931484],[-10.6207947,8.4930391],[-10.6216715,8.4922873],[-10.621978,8.4921894],[-10.622546,8.4927656],[-10.6225257,8.4934003],[-10.622166,8.4937871],[-10.6216016,8.494039],[-10.6207086,8.4944374],[-10.6202737,8.4948492],[-10.6202156,8.4954474],[-10.6203509,8.4958211],[-10.6206151,8.4962966],[-10.6236777,8.4988247],[-10.6251374,8.5001598],[-10.6264507,8.5003906],[-10.626944,8.501389],[-10.6270845,8.50193],[-10.6269706,8.5024808],[-10.6276604,8.504321],[-10.6276385,8.5050267],[-10.6274034,8.5060203],[-10.6272072,8.5073884],[-10.626051,8.5080266],[-10.6260055,8.509898],[-10.6257532,8.5111549],[-10.62518,8.5121184],[-10.623713,8.5131725],[-10.6229041,8.5153093],[-10.6224077,8.5168513],[-10.6219992,8.5199621],[-10.6211529,8.5256707],[-10.6205318,8.5276551],[-10.6200593,8.5284096],[-10.6195949,8.5286815],[-10.6186337,8.5294242],[-10.6169868,8.5304109],[-10.6152434,8.5316682],[-10.6146747,8.5323314],[-10.6140794,8.5331165],[-10.6139934,8.5340873],[-10.6139147,8.5353393],[-10.6135493,8.5359282],[-10.6136287,8.5363207],[-10.6137413,8.5365329],[-10.6139237,8.5368088],[-10.6144548,8.5371908],[-10.6146962,8.5374984],[-10.6147949,8.5375996],[-10.6149805,8.5377902],[-10.6153506,8.5380236],[-10.6160046,8.5382839],[-10.6161699,8.5383866],[-10.6162465,8.538616],[-10.6160866,8.5389768],[-10.6158704,8.5393688],[-10.6158208,8.5397652],[-10.6158501,8.5403844],[-10.6159366,8.5407407],[-10.6160393,8.541164],[-10.616028,8.5416651],[-10.6158132,8.5422015],[-10.6153254,8.5428165],[-10.6149785,8.5431127],[-10.614188,8.5440325],[-10.6133637,8.5452708],[-10.6126815,8.5460968],[-10.6124363,8.5461642],[-10.6121179,8.5461959],[-10.6118362,8.5459988],[-10.6116117,8.5456817],[-10.6114852,8.5453223],[-10.611539,8.543577],[-10.6111811,8.5433103],[-10.6106337,8.5430656],[-10.6101119,8.5431155],[-10.608948,8.5434656],[-10.6067326,8.5447219],[-10.605323,8.5457911],[-10.6044649,8.5462414],[-10.6039971,8.5463915],[-10.6035215,8.5464785],[-10.6028602,8.5464773],[-10.6024079,8.5463517],[-10.6013918,8.5461403],[-10.5998891,8.5462108],[-10.5990414,8.5465878],[-10.5982753,8.5470224],[-10.5968675,8.5480415],[-10.5961053,8.5485645],[-10.5954131,8.5488991],[-10.5947287,8.5490606],[-10.594122,8.5490913],[-10.5938459,8.5491375],[-10.5935724,8.5492498],[-10.5932626,8.5495951],[-10.5931148,8.5499335],[-10.5928698,8.5506373],[-10.5926676,8.5520486],[-10.5927026,8.5546713],[-10.5924968,8.5560119],[-10.5925355,8.5569209],[-10.5922661,8.557815],[-10.5912525,8.5592462],[-10.5905443,8.5602073],[-10.5902573,8.5611877],[-10.5904769,8.562592],[-10.5902366,8.5633833],[-10.5867512,8.5682196],[-10.5849814,8.5699559],[-10.5831985,8.5720912],[-10.5814267,8.5730245],[-10.5795482,8.573849],[-10.5785889,8.5735592],[-10.5783948,8.5735005],[-10.5775619,8.5725501],[-10.5763444,8.5726451],[-10.5744222,8.5733896],[-10.5743261,8.574245],[-10.5744702,8.5750686],[-10.5749188,8.5771753],[-10.5749964,8.5794249],[-10.57431,8.581753],[-10.5730285,8.5831468],[-10.5741453,8.5845249],[-10.5742831,8.5850972],[-10.5742139,8.5859187],[-10.5735572,8.5874868],[-10.5733832,8.5888867],[-10.5739294,8.5900296],[-10.5757998,8.5932523],[-10.5760504,8.5938518],[-10.5764057,8.5951011],[-10.5763627,8.5953943],[-10.5763268,8.5961162],[-10.5747711,8.5987313],[-10.5732528,8.5993819],[-10.570556,8.6000046],[-10.568367,8.6023438],[-10.5677214,8.6023633],[-10.567532,8.6023691],[-10.5642662,8.6011559],[-10.5620938,8.6000085],[-10.5610464,8.5988276],[-10.5605338,8.5979089],[-10.5596528,8.5983049],[-10.5582752,8.5997779],[-10.558179,8.6005065],[-10.5587237,8.6018845],[-10.5594125,8.6026447],[-10.5594606,8.6033891],[-10.5591722,8.6040068],[-10.5582591,8.6041177],[-10.5570898,8.6037376],[-10.554739,8.6027217],[-10.5543085,8.6029105],[-10.5526506,8.6051912],[-10.5501796,8.60763],[-10.5492626,8.6075353],[-10.5479069,8.6071081],[-10.5464593,8.6076462],[-10.5453576,8.6083858],[-10.542617,8.609729],[-10.5423184,8.61041],[-10.5421182,8.61197],[-10.5420813,8.61354],[-10.5418511,8.6144768],[-10.5414802,8.6147459],[-10.539565,8.6157416],[-10.5384509,8.6159914],[-10.5372866,8.6163933],[-10.53555,8.6168925],[-10.5351941,8.6169488],[-10.53478,8.6170242],[-10.5341447,8.6165509],[-10.5336554,8.6162469],[-10.5322046,8.61605],[-10.5308865,8.6143348],[-10.5302127,8.6148012],[-10.5290076,8.6155904],[-10.5281298,8.615814],[-10.5259918,8.6166868],[-10.523854,8.6178559],[-10.5202931,8.6203175],[-10.5197275,8.6201645],[-10.5176009,8.6191983],[-10.5176478,8.6175559],[-10.5171401,8.6167013],[-10.5152296,8.6153552],[-10.5143885,8.6148416],[-10.5134509,8.6144867],[-10.5113547,8.6154095],[-10.5111147,8.615664],[-10.5108374,8.6157521],[-10.5104205,8.6179389],[-10.5098658,8.6206048],[-10.5070607,8.6212548],[-10.5054986,8.6210617],[-10.5032981,8.6219876],[-10.5023463,8.6227043],[-10.5002019,8.6241096],[-10.4988472,8.6245333],[-10.4967147,8.6246134],[-10.4955918,8.6251145],[-10.4947998,8.6253682],[-10.4931024,8.6254609],[-10.492699,8.6256861],[-10.4911199,8.6275094],[-10.4933093,8.6295205],[-10.4935732,8.6304876],[-10.4933526,8.6315419],[-10.4924272,8.6323415],[-10.491481,8.6329317],[-10.4905582,8.6336085],[-10.4896354,8.634658],[-10.4884502,8.6357642],[-10.4874464,8.63626],[-10.4834183,8.6383937],[-10.4825484,8.6389067],[-10.4813059,8.6391959],[-10.4800141,8.6397231],[-10.4789656,8.640642],[-10.478062,8.6419684],[-10.4778709,8.643057],[-10.4782449,8.6447505],[-10.4782195,8.6450487],[-10.4773118,8.645612],[-10.4754998,8.6456349],[-10.4745308,8.6460019],[-10.4702617,8.6514029],[-10.4705065,8.6516734],[-10.4710674,8.6518255],[-10.4719751,8.6520312],[-10.4724896,8.6524177],[-10.4719963,8.653984],[-10.4720083,8.6544163],[-10.4721275,8.6546153],[-10.4732749,8.6549947],[-10.474249,8.6554121],[-10.4746016,8.6557204],[-10.476918,8.6557639],[-10.4772872,8.6559695],[-10.4769412,8.6566655],[-10.475103,8.6579979],[-10.4740297,8.6592465],[-10.4735328,8.6606357],[-10.4723223,8.6616576],[-10.4718791,8.6622322],[-10.4718042,8.6630816],[-10.473172,8.6666576],[-10.4726453,8.6674174],[-10.4727248,8.6678595],[-10.4722611,8.6681264],[-10.4718254,8.6689443],[-10.471462,8.669118],[-10.4709307,8.6692424],[-10.4707235,8.669374],[-10.4698491,8.6702444],[-10.4697332,8.6706751],[-10.469286,8.671497],[-10.4686138,8.6716456],[-10.4679802,8.6714773],[-10.4672893,8.6709882],[-10.4672125,8.6702546],[-10.4670185,8.66997],[-10.4665869,8.6698246],[-10.4658627,8.6701682],[-10.4652398,8.6709405],[-10.4646877,8.6717303],[-10.4643593,8.6729199],[-10.4650006,8.6734841],[-10.4653626,8.6735905],[-10.4662098,8.6741158],[-10.466462,8.674571],[-10.4664449,8.6749321],[-10.4661513,8.6753726],[-10.4660796,8.675916],[-10.4654718,8.6763531],[-10.4649785,8.6764104],[-10.4647241,8.676775],[-10.4644032,8.6775108],[-10.4645525,8.6783549],[-10.4647119,8.6792332],[-10.4655424,8.6798585],[-10.4661194,8.6805124],[-10.4669451,8.6805458],[-10.4677828,8.6810685],[-10.4686012,8.6810733],[-10.4692024,8.6810041],[-10.4694535,8.6811663],[-10.4690455,8.6819563],[-10.4697963,8.6829515],[-10.4701319,8.6836913],[-10.4701917,8.6839467],[-10.4702351,8.6850803],[-10.4708532,8.6858392],[-10.4721207,8.6872449],[-10.4729536,8.686634],[-10.4739193,8.6854646],[-10.4744818,8.6843262],[-10.4746984,8.6837126],[-10.4755696,8.6829697],[-10.4767129,8.6825353],[-10.4771389,8.6828109],[-10.4772462,8.6834596],[-10.4771664,8.6844216],[-10.4767789,8.6849458],[-10.4758,8.6857891],[-10.4755272,8.6864717],[-10.4754934,8.6872903],[-10.475602,8.6886172],[-10.4759641,8.6903307],[-10.4760704,8.6909154],[-10.4759448,8.6913569],[-10.4753606,8.6921349],[-10.4750829,8.6926647],[-10.4755416,8.6931993],[-10.4760969,8.693185],[-10.4770251,8.6932576],[-10.4770991,8.6934744],[-10.4768064,8.6939207],[-10.474642,8.6941525],[-10.4739529,8.6942948],[-10.4733884,8.6946669],[-10.4736884,8.6953825],[-10.474061,8.695738],[-10.4761884,8.695561],[-10.4769293,8.6952303],[-10.4776355,8.6951594],[-10.4782886,8.6946952],[-10.478868,8.6944713],[-10.4792218,8.6944723],[-10.4795247,8.6946765],[-10.4798053,8.69528],[-10.4800558,8.6961275],[-10.4801546,8.6972565],[-10.4804499,8.6985352],[-10.4803789,8.6992386],[-10.4808569,8.6997381],[-10.4813861,8.6999051],[-10.4826443,8.6998427],[-10.4831854,8.6992268],[-10.4838067,8.6988801],[-10.4840433,8.6992572],[-10.4840377,8.6999086],[-10.4837509,8.7007085],[-10.4837526,8.7015353],[-10.4835649,8.7018493],[-10.4833702,8.7020871],[-10.4834351,8.7025293],[-10.4837185,8.7024364],[-10.4839063,8.7022019],[-10.4844186,8.7024508],[-10.4851288,8.7029769],[-10.4853806,8.7042558],[-10.4861398,8.7042399],[-10.4861192,8.7049667],[-10.486248,8.705395],[-10.4872574,8.7055465],[-10.4874537,8.7062349],[-10.4879804,8.7071035],[-10.4880423,8.7076456],[-10.4883109,8.707866],[-10.4902153,8.7072375],[-10.4914127,8.7068342],[-10.491791,8.7064985],[-10.4921856,8.7063276],[-10.4932698,8.7063481],[-10.494712,8.7065928],[-10.4962775,8.7064009],[-10.4963912,8.7068419],[-10.4956626,8.7074958],[-10.493417,8.7099279],[-10.4927652,8.7118427],[-10.4930615,8.7131512],[-10.4944135,8.7123547],[-10.4973635,8.7117068],[-10.4979485,8.7127162],[-10.4999856,8.7134347],[-10.4994907,8.7151216],[-10.4994343,8.716129],[-10.4991202,8.716723],[-10.4976747,8.7171213],[-10.4965545,8.7169423],[-10.4959232,8.7173492],[-10.4957714,8.7180454],[-10.4951986,8.7190366],[-10.4963455,8.7211759],[-10.495797,8.7227431],[-10.4952779,8.7232407],[-10.4950614,8.7238023],[-10.4952441,8.7242799],[-10.4965369,8.7249326],[-10.4979131,8.7255864],[-10.4998976,8.7260255],[-10.50025,8.7266937],[-10.5008295,8.7274549],[-10.5005373,8.7282233],[-10.5009478,8.7286218],[-10.5023601,8.7296169],[-10.5033717,8.7301633],[-10.5041355,8.7305459],[-10.5041483,8.7313746],[-10.5038956,8.7315045],[-10.5035591,8.7316761],[-10.503249,8.7319652],[-10.5031765,8.7323279],[-10.5035435,8.7326262],[-10.5038276,8.7327898],[-10.5040635,8.7329002],[-10.5041985,8.7330185],[-10.5043144,8.7333121],[-10.5046935,8.7332137],[-10.5050254,8.7333096],[-10.5056244,8.7336815],[-10.5061342,8.7341119],[-10.5061069,8.735104],[-10.5058065,8.7363864],[-10.5050212,8.7373313],[-10.5039951,8.7384075],[-10.5026914,8.7397915],[-10.5021252,8.7403093],[-10.5016991,8.7409059],[-10.50091,8.7416087],[-10.5004421,8.7413562],[-10.4999128,8.7412069],[-10.4988441,8.7406822],[-10.4985215,8.7399668],[-10.4979411,8.7396715],[-10.4976709,8.7396377],[-10.4962613,8.7401001],[-10.4953752,8.7406552],[-10.4948017,8.7411951],[-10.4949253,8.7414091],[-10.4953513,8.7418059],[-10.4978266,8.7430646],[-10.5000236,8.7437231],[-10.5010714,8.7438377],[-10.5016982,8.7436098],[-10.5023469,8.7422447],[-10.5029768,8.7415732],[-10.5036989,8.7408021],[-10.5041122,8.7404953],[-10.504573,8.7405153],[-10.505507,8.7408885],[-10.5060208,8.7408193],[-10.50655,8.7411568],[-10.5073592,8.7413812],[-10.5077399,8.741398],[-10.5080642,8.7420662],[-10.5081803,8.7426922],[-10.5084256,8.7427693],[-10.5089724,8.7428272],[-10.5095392,8.7426466],[-10.509686,8.7427496],[-10.5100566,8.7426917],[-10.5103367,8.7422431],[-10.510129,8.741155],[-10.510665,8.7406253],[-10.5112015,8.7406784],[-10.5114134,8.741303],[-10.5111189,8.7423767],[-10.511172,8.7434124],[-10.5113965,8.7447104],[-10.5112637,8.7450636],[-10.5106095,8.7456578],[-10.5096462,8.7460252],[-10.5093661,8.7464929],[-10.5090475,8.7472493],[-10.509651,8.7480225],[-10.5105443,8.749101],[-10.5118394,8.7509994],[-10.5123212,8.7527709],[-10.5123646,8.7539687],[-10.5129972,8.7562069],[-10.5130696,8.7569514],[-10.5124505,8.757871],[-10.5124048,8.7581322],[-10.5127364,8.7599483],[-10.5136152,8.7621769],[-10.5143685,8.7637803],[-10.5152859,8.7659182],[-10.5162482,8.7680033],[-10.5163991,8.7689495],[-10.5168206,8.7707853],[-10.5171432,8.7721892],[-10.5173253,8.77298],[-10.517351,8.7739727],[-10.51757,8.7746163],[-10.5178293,8.7751526],[-10.5182929,8.7758525],[-10.5186498,8.7763471],[-10.5187491,8.7767743],[-10.519095,8.7783596],[-10.5195585,8.7795304],[-10.5196763,8.7814139],[-10.5198161,8.7826356],[-10.5203532,8.7830356],[-10.5212586,8.7838532],[-10.5218856,8.7847119],[-10.5223616,8.7851335],[-10.5231057,8.7855089],[-10.523985,8.784771],[-10.5242088,8.7848122],[-10.5244507,8.7851901],[-10.5244299,8.7860874],[-10.524612,8.7866273],[-10.5251739,8.7876686],[-10.5259648,8.7883936],[-10.5268545,8.7891726],[-10.5277651,8.7891135],[-10.5273945,8.7884116],[-10.5278507,8.7882007],[-10.5288441,8.7886952],[-10.5304482,8.7903459],[-10.5329868,8.792033],[-10.5332002,8.7935091],[-10.5347307,8.7954725],[-10.5360552,8.7957634],[-10.5370339,8.7954362],[-10.537674,8.7955743],[-10.5379316,8.7960034],[-10.5376225,8.7968251],[-10.5369235,8.7978431],[-10.5361996,8.7979715],[-10.5362517,8.7985679],[-10.536413,8.7987531],[-10.5372246,8.7990924],[-10.5378854,8.7991336],[-10.5391186,8.8000642],[-10.5396285,8.8001876],[-10.5399979,8.8004087],[-10.5402633,8.8011492],[-10.5402268,8.8016685],[-10.5393787,8.802846],[-10.5394828,8.8035247],[-10.5407888,8.8042446],[-10.5430105,8.805279],[-10.5436141,8.8051649],[-10.5438742,8.8048976],[-10.5441968,8.8035196],[-10.5445679,8.8030797],[-10.5452687,8.8027174],[-10.5467984,8.8024603],[-10.5480679,8.8025015],[-10.5487756,8.8018742],[-10.5494144,8.8003848],[-10.5493776,8.799374],[-10.5496903,8.7986578],[-10.5500472,8.7984978],[-10.5503047,8.7987923],[-10.5505623,8.7993413],[-10.5507241,8.8002248],[-10.550766,8.8013181],[-10.5515188,8.80253],[-10.5519125,8.8035189],[-10.5518904,8.803857],[-10.5520302,8.8040534],[-10.5524349,8.8041479],[-10.5538441,8.8051696],[-10.5546866,8.8057077],[-10.5556395,8.8060894],[-10.5563091,8.8060385],[-10.5570155,8.8056713],[-10.5573994,8.8053195],[-10.5581295,8.8049801],[-10.5586674,8.8049623],[-10.5592156,8.8051587],[-10.5598558,8.8049478],[-10.5604886,8.8046024],[-10.5608455,8.8047005],[-10.5610479,8.8053659],[-10.5610612,8.8059776],[-10.5608529,8.8066457],[-10.5604408,8.8070093],[-10.5597491,8.8073838],[-10.5596093,8.8075946],[-10.5597234,8.8086163],[-10.559705,8.8096416],[-10.5595872,8.8099942],[-10.5594842,8.8101433],[-10.5589986,8.8105323],[-10.5589949,8.8108523],[-10.5594401,8.8113722],[-10.5607683,8.8123357],[-10.5613201,8.8131246],[-10.5617951,8.8145594],[-10.5623622,8.8161739],[-10.5622868,8.8170788],[-10.5619044,8.8176444],[-10.5618653,8.8178655],[-10.5613034,8.8180943],[-10.5608351,8.8182717],[-10.5605151,8.8183925],[-10.5603278,8.8186933],[-10.5601215,8.8187461],[-10.5597347,8.8188347],[-10.5594641,8.8194311],[-10.5597831,8.8200549],[-10.558981,8.8203167],[-10.5586793,8.820433],[-10.5583555,8.8203385],[-10.5581422,8.8202149],[-10.5582231,8.8198368],[-10.5581937,8.8194151],[-10.557811,8.8194732],[-10.5573842,8.819815],[-10.5573695,8.8202004],[-10.5577701,8.8205929],[-10.5577002,8.8209056],[-10.55745,8.8214],[-10.5572955,8.8221526],[-10.5574022,8.8230542],[-10.5573175,8.8233305],[-10.5568577,8.8238359],[-10.5570232,8.8243522],[-10.5578253,8.8244285],[-10.5580755,8.8246066],[-10.5580313,8.8250829],[-10.5580975,8.825341],[-10.5583919,8.8259155],[-10.558138,8.8262754],[-10.5577517,8.8265444],[-10.5576928,8.826908],[-10.5578473,8.8271298],[-10.5583992,8.8274788],[-10.5589585,8.8276642],[-10.559319,8.8277478],[-10.5594551,8.828195],[-10.5593521,8.8284095],[-10.5591534,8.8285222],[-10.558929,8.8286821],[-10.5587524,8.8286967],[-10.5586715,8.8284313],[-10.5583955,8.8283004],[-10.5580865,8.8282822],[-10.5579393,8.828624],[-10.5580239,8.828853],[-10.5587892,8.8290057],[-10.5592013,8.8293075],[-10.5596148,8.8300257],[-10.559646,8.8303959],[-10.5598684,8.8312301],[-10.5594678,8.8316979],[-10.5593546,8.8320386],[-10.5593832,8.8325463],[-10.5592245,8.8331655],[-10.5588824,8.8337653],[-10.5593239,8.8342925],[-10.559942,8.8348923],[-10.5602768,8.836452],[-10.5602437,8.8368519],[-10.5592319,8.8378989],[-10.5590995,8.8385169],[-10.5590884,8.840022],[-10.5594563,8.8411854],[-10.5595851,8.8418615],[-10.5601995,8.8429813],[-10.559747,8.8437811],[-10.5590479,8.8447372],[-10.5590663,8.8451116],[-10.5593312,8.8454424],[-10.5594858,8.8451843],[-10.5597617,8.8450353],[-10.5599125,8.845228],[-10.5600928,8.8463949],[-10.5611414,8.8461732],[-10.561616,8.8465876],[-10.5621237,8.8475183],[-10.5613143,8.8484344],[-10.5612775,8.8502884],[-10.5616123,8.8520588],[-10.5621716,8.8546508],[-10.5621384,8.8556396],[-10.563886,8.8552688],[-10.5638971,8.8563012],[-10.5630398,8.856832],[-10.5625947,8.8573597],[-10.5630325,8.8580135],[-10.5630656,8.8584897],[-10.5634482,8.859104],[-10.5635292,8.8597663],[-10.5644416,8.8602898],[-10.5653401,8.860168],[-10.5659379,8.8604243],[-10.566166,8.8610913],[-10.5661955,8.8615203],[-10.5665376,8.8615348],[-10.5667198,8.861613],[-10.5671668,8.8631034],[-10.5668908,8.8634342],[-10.5668412,8.8641395],[-10.5673047,8.864134],[-10.5673783,8.8643431],[-10.5671355,8.8647466],[-10.567187,8.8651682],[-10.5675678,8.8655481],[-10.5671741,8.865779],[-10.5668669,8.8660534],[-10.5667179,8.8663097],[-10.5667271,8.8666296],[-10.566889,8.8667368],[-10.5671318,8.8665078],[-10.5674519,8.8665078],[-10.5678529,8.8665514],[-10.5680737,8.8667768],[-10.5680332,8.8669368],[-10.567772,8.8670277],[-10.5676396,8.8671912],[-10.5672459,8.8671476],[-10.5671429,8.8673366],[-10.5672128,8.8677401],[-10.5672385,8.8684599],[-10.5672606,8.8691324],[-10.5674924,8.8693178],[-10.5682209,8.8693614],[-10.5683938,8.8694959],[-10.5683643,8.869754],[-10.5676874,8.8707319],[-10.5677554,8.8708991],[-10.5679633,8.8710372],[-10.5683846,8.8708555],[-10.5687488,8.8709391],[-10.5690064,8.8711027],[-10.5694699,8.8715389],[-10.5696613,8.872146],[-10.5697488,8.8728254],[-10.5697438,8.8734448],[-10.5698118,8.87419],[-10.5698424,8.874635],[-10.5701255,8.8750483],[-10.5704663,8.8754519],[-10.571023,8.8757089],[-10.5712285,8.8759814],[-10.5709684,8.8767242],[-10.5713066,8.877336],[-10.5709189,8.8775056],[-10.5704507,8.8775159],[-10.5702555,8.8776547],[-10.5703154,8.8778963],[-10.5705495,8.8782022],[-10.5706172,8.8785646],[-10.5704897,8.8788422],[-10.5700604,8.8790453],[-10.5696364,8.8795003],[-10.5695739,8.8800066],[-10.5697664,8.8803125],[-10.5698003,8.8805284],[-10.5695063,8.8809911],[-10.5694829,8.8812121],[-10.5698263,8.8813432],[-10.570024,8.8815463],[-10.5701229,8.8819858],[-10.5703128,8.8820963],[-10.5709007,8.8822017],[-10.5710074,8.8823868],[-10.5709632,8.8827929],[-10.5706614,8.8831476],[-10.5706172,8.8834047],[-10.5707602,8.8836488],[-10.5714601,8.8840627],[-10.5715433,8.8843557],[-10.5714419,8.8846847],[-10.570612,8.8851782],[-10.5704975,8.8854455],[-10.5707889,8.8860315],[-10.5710178,8.8863297],[-10.5713716,8.8863451],[-10.5718035,8.8860213],[-10.5722978,8.8861858],[-10.5728701,8.885939],[-10.5730158,8.8851576],[-10.5733462,8.8849254],[-10.5736167,8.885109],[-10.5733039,8.8860141],[-10.5738411,8.8866956],[-10.573823,8.8870328],[-10.5739583,8.8872641],[-10.5745306,8.8872436],[-10.5747648,8.8877011],[-10.5746607,8.8880095],[-10.5742965,8.8882203],[-10.5741352,8.8885184],[-10.574156,8.8888063],[-10.5743355,8.8889425],[-10.574675,8.8890711],[-10.5747232,8.8891893],[-10.5743954,8.8895131],[-10.5741287,8.8897483],[-10.5738321,8.889828],[-10.5734094,8.8898987],[-10.5732142,8.8902752],[-10.5730621,8.8908626],[-10.5731807,8.8912093],[-10.573183,8.8914293],[-10.5734068,8.8914473],[-10.5734861,8.8913316],[-10.5733886,8.8910708],[-10.573611,8.8907071],[-10.574047,8.8906875],[-10.5742915,8.8908932],[-10.5744268,8.8911039],[-10.5745231,8.8921732],[-10.5747,8.8923814],[-10.5749862,8.8924739],[-10.575327,8.8920421],[-10.5758004,8.8917825],[-10.5762427,8.891947],[-10.5762973,8.8922734],[-10.5759825,8.8924765],[-10.5758707,8.8928826],[-10.5764196,8.8944736],[-10.5761074,8.8950699],[-10.5759097,8.8958872],[-10.575764,8.8965581],[-10.5755117,8.8970207],[-10.5751579,8.8975039],[-10.5750538,8.8981156],[-10.5751214,8.8987402],[-10.5753426,8.8991463],[-10.5760216,8.8996861],[-10.5760398,8.8999945],[-10.5758941,8.9004494],[-10.5749862,8.9020121],[-10.5746792,8.9033589],[-10.5749237,8.9043819],[-10.5746323,8.9049961],[-10.5742577,8.9054639],[-10.5745855,8.9059471],[-10.5745517,8.90697],[-10.5748144,8.9078362],[-10.5745803,8.9080264],[-10.5739559,8.9080906],[-10.5735969,8.9082603],[-10.5733029,8.9085044],[-10.5729934,8.9088488],[-10.573022,8.9090262],[-10.5732223,8.9091958],[-10.5737426,8.9092601],[-10.5742733,8.9095454],[-10.5744112,8.9098666],[-10.5743358,8.909972],[-10.5738024,8.9100388],[-10.5736359,8.9102881],[-10.5738519,8.9108664],[-10.5735943,8.911108],[-10.5735553,8.9113522],[-10.5738415,8.9117223],[-10.5738415,8.9123443],[-10.5740808,8.9132541],[-10.5746141,8.9133312],[-10.5749003,8.9129637],[-10.5751188,8.9124239],[-10.5755897,8.9121875],[-10.5758213,8.9123391],[-10.5755845,8.9130202],[-10.5754961,8.9134083],[-10.5757562,8.9135394],[-10.5761048,8.9137193],[-10.5763572,8.9140354],[-10.5765055,8.9145289],[-10.5764612,8.9148887],[-10.5757276,8.9153539],[-10.5753712,8.9155569],[-10.5753165,8.9157291],[-10.5757146,8.9159425],[-10.5759097,8.9162817],[-10.5760684,8.9168831],[-10.5759279,8.9170682],[-10.5754362,8.917171],[-10.5750174,8.9172866],[-10.5749211,8.9176773],[-10.5752151,8.9185049],[-10.5757588,8.9197231],[-10.5752957,8.9198413],[-10.5751266,8.9200546],[-10.5752151,8.9209285],[-10.5749497,8.9212831],[-10.5749393,8.9215993],[-10.5751917,8.9220388],[-10.5753244,8.9223754],[-10.5754752,8.9226941],[-10.5756808,8.9227764],[-10.5757406,8.9223909],[-10.5760892,8.9221107],[-10.5765393,8.9225014],[-10.5765003,8.9227789],[-10.5766746,8.9232261],[-10.577096,8.9233855],[-10.5775877,8.9232955],[-10.5776606,8.923478],[-10.5774212,8.9236605],[-10.5775305,8.9239946],[-10.5777646,8.9241565],[-10.578043,8.9242002],[-10.5783422,8.9243698],[-10.5785529,8.9246242],[-10.578415,8.9248864],[-10.5780222,8.9252591],[-10.5779545,8.9257628],[-10.5780638,8.9260352],[-10.5780612,8.9262768],[-10.5779701,8.9264438],[-10.5776814,8.9265492],[-10.5773666,8.9267188],[-10.5772391,8.9269681],[-10.5772911,8.9271737],[-10.5774368,8.9272817],[-10.5777022,8.9273639],[-10.5779727,8.9275156],[-10.5779233,8.9276672],[-10.5776892,8.9276723],[-10.5774498,8.927567],[-10.5771506,8.9275413],[-10.5770024,8.9277032],[-10.5770674,8.9279499],[-10.5772833,8.9282172],[-10.5774212,8.9285847],[-10.5773354,8.9287774],[-10.577083,8.9292169],[-10.5768203,8.9293686],[-10.5767032,8.9300034],[-10.576789,8.9301396],[-10.5769607,8.9301833],[-10.5772053,8.9294945],[-10.577364,8.9295742],[-10.5775721,8.929109],[-10.5778635,8.9292272],[-10.5782017,8.9297386],[-10.5781054,8.9302141],[-10.5779675,8.9308849],[-10.5780352,8.9310519],[-10.5782121,8.9310134],[-10.578337,8.9308617],[-10.5785867,8.9307101],[-10.5788495,8.9306793],[-10.5790316,8.9308746],[-10.5792319,8.9313603],[-10.580015,8.9315865],[-10.580335,8.9318615],[-10.580655,8.9330334],[-10.5807694,8.9332544],[-10.5811336,8.9333007],[-10.5813105,8.9334061],[-10.5814094,8.9335782],[-10.5813522,8.934046],[-10.5814458,8.9342644],[-10.581654,8.934488],[-10.5818621,8.9343929],[-10.5821014,8.9342002],[-10.5823121,8.9342079],[-10.5825957,8.9343749],[-10.5828585,8.9348144],[-10.5828689,8.9351871],[-10.5825489,8.9355212],[-10.5825983,8.9357319],[-10.5826347,8.9361919],[-10.5827752,8.9363847],[-10.5830042,8.9366982],[-10.5831186,8.9371737],[-10.5826503,8.9373818],[-10.5825437,8.9375849],[-10.5825619,8.9378855],[-10.5832409,8.9381682],[-10.583782,8.9384484],[-10.5837716,8.9386976],[-10.5832513,8.9390215],[-10.5827102,8.9391602],[-10.5821404,8.9395226],[-10.5824422,8.9399569],[-10.5824136,8.9406174],[-10.5826582,8.9408898],[-10.5829105,8.940823],[-10.5830588,8.9402679],[-10.5833996,8.9397359],[-10.5837924,8.9395586],[-10.5839954,8.9396228],[-10.584011,8.9401111],[-10.5841645,8.9404401],[-10.5842061,8.9407922],[-10.5838393,8.9408256],[-10.5834828,8.9409746],[-10.5831603,8.9412316],[-10.5831446,8.9414141],[-10.5834828,8.9417533],[-10.5839043,8.9421954],[-10.5838705,8.9423521],[-10.5833372,8.9423958],[-10.5831733,8.9425988],[-10.5832799,8.9428944],[-10.584141,8.9437604],[-10.5842321,8.9440817],[-10.5840838,8.9444286],[-10.5835271,8.9442436],[-10.5832435,8.9445623],[-10.5832851,8.9449734],[-10.5840812,8.945215],[-10.5845651,8.9457393],[-10.5842581,8.9469626],[-10.5845443,8.9479802],[-10.5850802,8.9488489],[-10.5849605,8.9499745],[-10.5851218,8.9503959],[-10.5850698,8.9515215],[-10.5854184,8.9521435],[-10.585382,8.952493],[-10.5857722,8.953341],[-10.5858659,8.9550011],[-10.5869898,8.9559263],[-10.5876974,8.9567281],[-10.5878639,8.9576841],[-10.5880252,8.958306],[-10.5886235,8.9578999],[-10.5889461,8.9572215],[-10.5892323,8.9569388],[-10.5895081,8.9571701],[-10.5892271,8.9575247],[-10.5889357,8.9594932],[-10.5878743,8.9598992],[-10.5872915,8.9593133],[-10.5867504,8.9592825],[-10.5866568,8.9595857],[-10.5861,8.9597142],[-10.5855329,8.9593544],[-10.5848513,8.9597245],[-10.5845651,8.9605006],[-10.5851687,8.9617958],[-10.5852519,8.9627723],[-10.5850334,8.9633428],[-10.5844871,8.9638002],[-10.5845911,8.9642782],[-10.5850802,8.9647048],[-10.585434,8.964417],[-10.587073,8.9628905],[-10.5880096,8.9632708],[-10.5885507,8.9649104],[-10.5890866,8.9674698],[-10.5886652,8.9687239],[-10.5878327,8.9694023],[-10.5876453,8.9701732],[-10.5887224,8.9713553],[-10.5892271,8.9732209],[-10.5889357,8.9741974],[-10.5898098,8.9756879],[-10.5905383,8.9776974],[-10.5894664,8.978643],[-10.5896069,8.9801642],[-10.5898723,8.9813514],[-10.589149,8.9830885],[-10.5897838,8.9842397],[-10.5904758,8.9852188],[-10.5904342,8.9859357],[-10.5912017,8.9869044],[-10.5911496,8.9873413],[-10.5908635,8.9872333],[-10.5906684,8.9874106],[-10.5907673,8.9875391],[-10.5911087,8.9877749],[-10.5913257,8.9918604],[-10.5910425,8.993502],[-10.5901448,8.9948756],[-10.5905936,8.9956823],[-10.5903784,8.996317],[-10.5893378,8.9981465],[-10.5890672,9.0000891],[-10.5875167,9.0004694],[-10.586601,9.0017027],[-10.5867564,9.0035609],[-10.5878593,9.0034767],[-10.5891139,9.0042289],[-10.5894855,9.0050465],[-10.5902434,9.0051265],[-10.5904224,9.0056652],[-10.5899789,9.0067603],[-10.5896515,9.0088642],[-10.5897802,9.0094238],[-10.5889193,9.0107247],[-10.5890407,9.0120983],[-10.5890186,9.0120438],[-10.5874329,9.0132865],[-10.585801,9.0128906],[-10.5845256,9.0143735],[-10.5838519,9.0146587],[-10.5834235,9.0144924],[-10.5831252,9.01473],[-10.5833562,9.0155951],[-10.5843572,9.0161132],[-10.5838182,9.0166123],[-10.5825065,9.0164079],[-10.5811084,9.015216],[-10.5809562,9.0151388],[-10.5805649,9.0157337],[-10.5799933,9.0166546],[-10.5799966,9.0171587],[-10.5803862,9.0179243],[-10.5808141,9.0181266],[-10.5811116,9.0193212],[-10.5808261,9.0209117],[-10.5813652,9.0216817],[-10.5816636,9.0226608],[-10.5815895,9.0232749],[-10.5808261,9.0240297],[-10.5809223,9.0244345],[-10.5809608,9.0249613],[-10.5805855,9.0254936],[-10.5809031,9.026159],[-10.5801908,9.026929],[-10.5806817,9.0276134],[-10.580624,9.0281743],[-10.5799695,9.0286876],[-10.5800753,9.0291819],[-10.5807298,9.0293625],[-10.5814325,9.0293054],[-10.5816635,9.0295241],[-10.5818078,9.0300564],[-10.5816057,9.0306933],[-10.5814806,9.0311686],[-10.5812459,9.0314301],[-10.5810795,9.0314671],[-10.5808609,9.0315157],[-10.5802834,9.0311735],[-10.5798984,9.0307362],[-10.5797602,9.0307122],[-10.5795459,9.0308839],[-10.5793882,9.031455],[-10.5795783,9.0318344],[-10.580108,9.0318544],[-10.5802643,9.0318137],[-10.5804679,9.0319583],[-10.5804153,9.0323536],[-10.5800959,9.0323297],[-10.5797521,9.0325174],[-10.5794488,9.0332203],[-10.5787533,9.0335478],[-10.5782883,9.034051],[-10.5784581,9.0343545],[-10.5789959,9.0344623],[-10.5791577,9.0348816],[-10.5787816,9.0358841],[-10.5784136,9.0361357],[-10.5782721,9.0367467],[-10.578082,9.0379807],[-10.5777262,9.0381764],[-10.5770994,9.0382843],[-10.5770953,9.0386836],[-10.5768365,9.0388354],[-10.5765939,9.0387435],[-10.5765049,9.0384879],[-10.5763715,9.0382603],[-10.5761491,9.0382483],[-10.5760277,9.038424],[-10.5762744,9.0386597],[-10.5763755,9.039071],[-10.5760156,9.0398378],[-10.5760439,9.0411677],[-10.5758417,9.0417308],[-10.5759514,9.0426673],[-10.5756926,9.0432164],[-10.5754095,9.04344],[-10.574991,9.0436637],[-10.5747099,9.043484],[-10.5743399,9.0434041],[-10.5742691,9.0435818],[-10.5741195,9.0438733],[-10.5738546,9.0439532],[-10.573798,9.044081],[-10.5738102,9.0443965],[-10.574069,9.0447459],[-10.574348,9.0451233],[-10.5743925,9.0454668],[-10.5745745,9.0462256],[-10.5745522,9.0466669],[-10.5745785,9.0471002],[-10.5744066,9.0472719],[-10.574073,9.04718],[-10.5738627,9.0470123],[-10.5737131,9.0470203],[-10.5735857,9.0472839],[-10.5737252,9.0475794],[-10.5739193,9.0477032],[-10.574168,9.0478709],[-10.5741236,9.0481005],[-10.5740245,9.0483262],[-10.5737475,9.0485318],[-10.573612,9.0487555],[-10.5735675,9.0489711],[-10.5735797,9.0491508],[-10.5735938,9.0493685],[-10.5735145,9.0494016],[-10.5732577,9.0494962],[-10.5359763,9.0632323],[-10.5133245,9.062461],[-10.4836428,9.0848294],[-10.4625531,9.067089],[-10.4602099,9.0362342],[-10.4953592,9.0069197],[-10.4933454,8.9994607],[-10.4891105,8.9837751],[-10.4484934,8.9860896],[-10.4039708,9.0015194],[-10.3828812,9.0400912],[-10.3610105,9.0632323],[-10.3282044,9.0601469],[-10.3071147,9.0362342],[-10.3102391,8.980689],[-10.2883684,8.9490552],[-10.26103,8.9459689],[-10.2523371,8.9371614],[-10.2495801,8.9343681],[-10.2305672,8.9151037],[-10.2071343,8.8865511],[-10.180577,8.9104737],[-10.1423032,8.9089304],[-10.1173081,8.8742034],[-10.0915319,8.8742034],[-10.0470093,8.9004419],[-10.0142032,8.8811491],[-10.0165465,8.8340704],[-9.996238,8.8024239],[-9.9454666,8.8093709],[-9.8829952,8.8051705],[-9.8595547,8.8156605],[-9.8121573,8.8265167],[-9.7735615,8.8249778],[-9.7349339,8.8354371],[-9.6994949,8.8473844],[-9.6744791,8.8461485],[-9.6619712,8.8350251],[-9.6578019,8.787644],[-9.6529768,8.776555],[-9.6398739,8.7464382],[-9.6307014,8.7229488],[-9.6194443,8.7002822],[-9.6175752,8.6963561],[-9.6159527,8.6929476],[-9.6127735,8.6862694],[-9.5884967,8.6895419],[-9.5760836,8.6912152],[-9.5243843,8.6677223],[-9.4972222,8.6492122],[-9.4814406,8.6384573],[-9.4439169,8.6306254],[-9.3817943,8.6537084],[-9.3567785,8.6343353],[-9.2842328,8.58899],[-9.2208594,8.5720872],[-9.1337211,8.5724995],[-9.0791033,8.5848675],[-9.0318155,8.6055706],[-8.9953004,8.6215567],[-8.9200615,8.6544319],[-8.9209743,8.6592447],[-8.9188444,8.6640575],[-8.9173231,8.6793976],[-8.9227999,8.6866163],[-8.9176274,8.6941356],[-8.9308898,8.6974131],[-8.9322321,8.6977448],[-8.9316236,8.7175948],[-8.9413601,8.7163918],[-8.9416643,8.7248128],[-8.944707,8.7320306],[-8.9520093,8.7368423],[-8.955052,8.7572917],[-8.9528355,8.7715161],[-8.9224094,8.788355],[-8.8855938,8.8112067],[-8.8353908,8.8511937],[-8.8174394,8.8863666],[-8.7961411,8.9137209],[-8.7219014,8.9383682],[-8.7059928,8.9540833],[-8.7002989,8.9597077],[-8.7018202,8.9837508],[-8.7228142,9.0129009],[-8.7243827,9.0183043],[-8.7238084,9.0192413],[-8.7235286,9.0208452],[-8.7228519,9.0230203],[-8.7225903,9.0237357],[-8.7219237,9.02431],[-8.7216072,9.0247519],[-8.721431,9.0252695],[-8.7218295,9.0263902],[-8.7219471,9.0273158],[-8.7221253,9.0278297],[-8.72219,9.0286811],[-8.7219714,9.0296388],[-8.721457,9.0306458],[-8.7213271,9.0312386],[-8.7213868,9.0319127],[-8.7212072,9.0330633],[-8.7205021,9.0339808],[-8.7201922,9.0345465],[-8.7200297,9.0357196],[-8.7201279,9.0365995],[-8.7200542,9.0372834],[-8.7201572,9.0381723],[-8.7200278,9.03914],[-8.7193461,9.0399126],[-8.7188729,9.0408541],[-8.7184995,9.0409335],[-8.7179054,9.0405951],[-8.7168713,9.0402512],[-8.7155494,9.0400684],[-8.713467,9.040071],[-8.7128846,9.0399409],[-8.7122195,9.0401073],[-8.7114319,9.0405528],[-8.7108592,9.0413069],[-8.7104505,9.0424945],[-8.7101608,9.0427341],[-8.7095036,9.0437434],[-8.7093712,9.0442356],[-8.7094946,9.0445853],[-8.7109245,9.0459803],[-8.7115425,9.0470071],[-8.7123953,9.0482772],[-8.7138146,9.0497208],[-8.7150735,9.0504844],[-8.7162465,9.0507638],[-8.7165625,9.0510169],[-8.7165981,9.0514832],[-8.7169089,9.0530496],[-8.7169886,9.053804],[-8.716755,9.0544279],[-8.7162891,9.0550051],[-8.7159767,9.0550722],[-8.7153024,9.0544725],[-8.7141163,9.053911],[-8.7132276,9.0538174],[-8.7126141,9.0538852],[-8.7120493,9.0540888],[-8.7113491,9.054794],[-8.7110532,9.0552869],[-8.7111753,9.0556186],[-8.7114108,9.0558573],[-8.7116262,9.0562394],[-8.7118286,9.0571057],[-8.7120099,9.0574792],[-8.7126132,9.0579122],[-8.7146277,9.0587953],[-8.7156346,9.0590324],[-8.7163466,9.0588445],[-8.7167652,9.05849],[-8.7170279,9.0576085],[-8.7181952,9.0569286],[-8.7186383,9.0563042],[-8.719362,9.0557212],[-8.7200227,9.0556775],[-8.7202876,9.0558677],[-8.7203468,9.0565147],[-8.7194028,9.0574261],[-8.7189272,9.0582884],[-8.7188431,9.0591344],[-8.7189476,9.0595926],[-8.7192425,9.0597454],[-8.7197272,9.0598394],[-8.7214634,9.0607913],[-8.7217281,9.061173],[-8.7215707,9.0615481],[-8.7206435,9.0622757],[-8.7198036,9.063975],[-8.7192678,9.065767],[-8.7187577,9.0685869],[-8.7188626,9.0688856],[-8.7191696,9.0693075],[-8.7195137,9.0695882],[-8.7195255,9.0698643],[-8.7190726,9.0708797],[-8.7190842,9.0711264],[-8.7196882,9.071371],[-8.7201019,9.0716716],[-8.7213243,9.0719256],[-8.7221084,9.0715092],[-8.7227086,9.071499],[-8.7233402,9.071822],[-8.7234901,9.0727268],[-8.7235284,9.0735294],[-8.7229655,9.0738951],[-8.7217877,9.0753141],[-8.7216891,9.075759],[-8.7219858,9.0768728],[-8.7220567,9.0787297],[-8.7216991,9.0790536],[-8.7210602,9.0792155],[-8.7207954,9.0790335],[-8.7200387,9.0767155],[-8.7194496,9.0754423],[-8.7190166,9.0749569],[-8.7182339,9.074384],[-8.7179027,9.0744863],[-8.7177691,9.0747657],[-8.7182382,9.0757022],[-8.7184516,9.0765656],[-8.7180887,9.0782614],[-8.717822,9.0790035],[-8.7179134,9.0794452],[-8.7189305,9.0814641],[-8.7196852,9.0835042],[-8.7196427,9.0839596],[-8.719502,9.0842362],[-8.7178662,9.0850115],[-8.7169916,9.0851795],[-8.7165027,9.0855368],[-8.7163694,9.08593],[-8.7165601,9.0862167],[-8.7182115,9.0873197],[-8.7184871,9.0877094],[-8.7186311,9.0882105],[-8.7184768,9.0899718],[-8.7185332,9.0912617],[-8.718412,9.0928909],[-8.7186176,9.0937813],[-8.7185628,9.0944948],[-8.7182048,9.0950845],[-8.717206,9.0956614],[-8.7158558,9.0959406],[-8.7147206,9.0967802],[-8.7147055,9.0971487],[-8.7155139,9.0977151],[-8.7156853,9.0982197],[-8.7157276,9.0989536],[-8.7155741,9.0997235],[-8.7154851,9.1007015],[-8.7151655,9.1013173],[-8.7136891,9.1013683],[-8.7093949,9.1026783],[-8.7082899,9.1042122],[-8.707912,9.1044793],[-8.7072903,9.1046587],[-8.7070165,9.1050969],[-8.7068914,9.105535],[-8.7072712,9.1062732],[-8.7088674,9.1063092],[-8.7092296,9.1061055],[-8.709923,9.105214],[-8.7104703,9.1047496],[-8.7113697,9.103794],[-8.7118907,9.1036199],[-8.7124681,9.1039368],[-8.7128047,9.1044491],[-8.7134821,9.1049813],[-8.7135669,9.1055266],[-8.7129336,9.1066792],[-8.7127438,9.1088283],[-8.7126056,9.1097927],[-8.7131814,9.1116191],[-8.7132041,9.1120783],[-8.7130332,9.1128561],[-8.7126676,9.1138697],[-8.7126507,9.1145859],[-8.7131471,9.1155755],[-8.7132237,9.1193601],[-8.7128298,9.1228995],[-8.7127322,9.1236086],[-8.7128422,9.1243845],[-8.7126008,9.1262072],[-8.7112167,9.1262601],[-8.7107026,9.1270222],[-8.7099427,9.1300955],[-8.7090087,9.1355397],[-8.7083538,9.1377713],[-8.7078603,9.1400063],[-8.7074685,9.140763],[-8.7076446,9.1419797],[-8.7077088,9.1424236],[-8.707399,9.1444552],[-8.7053176,9.1445823],[-8.7046587,9.1459547],[-8.7040059,9.1468573],[-8.7021589,9.147999],[-8.701406,9.149463],[-8.7010909,9.1509019],[-8.6995546,9.1522242],[-8.6980577,9.1545187],[-8.6974668,9.1580578],[-8.6953003,9.1603134],[-8.694867,9.1615967],[-8.6944336,9.1623356],[-8.692661,9.1629967],[-8.6920307,9.1647857],[-8.6916762,9.1675857],[-8.6923459,9.1696079],[-8.6921489,9.1706579],[-8.6907308,9.1719412],[-8.6873431,9.1722134],[-8.6861613,9.1725245],[-8.682813,9.1729912],[-8.6807646,9.1722912],[-8.6798192,9.1712801],[-8.6772981,9.1719023],[-8.676786,9.1728745],[-8.6775344,9.1736134],[-8.6795828,9.1737301],[-8.6810797,9.1747023],[-8.6809616,9.1777355],[-8.6795434,9.1781244],[-8.6775738,9.1761411],[-8.6748952,9.1765689],[-8.6731619,9.1760245],[-8.6715074,9.17618],[-8.6693803,9.1773855],[-8.6679622,9.1767633],[-8.6677258,9.1772689],[-8.6682379,9.17828],[-8.670562,9.1801466],[-8.6711529,9.1812743],[-8.6708378,9.1822465],[-8.6693015,9.1811965],[-8.6674501,9.1811965],[-8.6671743,9.1831798],[-8.6665834,9.1852797],[-8.6651653,9.1869129],[-8.6653229,9.1882351],[-8.6648896,9.1897905],[-8.6641805,9.1906849],[-8.6624867,9.1910349],[-8.6605564,9.191346],[-8.6598868,9.1927848],[-8.6572475,9.1944958],[-8.6567354,9.1957012],[-8.6575233,9.1962068],[-8.6597686,9.1949235],[-8.6615019,9.1949235],[-8.6624867,9.1963623],[-8.660911,9.1983455],[-8.6581141,9.1998231],[-8.6575233,9.200873],[-8.6579566,9.2019229],[-8.6579566,9.2035172],[-8.6573263,9.2073668],[-8.6579172,9.2090777],[-8.6589808,9.2097387],[-8.6601231,9.2109053],[-8.6609898,9.2102054],[-8.6621715,9.2104387],[-8.6622897,9.2120329],[-8.6635896,9.2119163],[-8.6648108,9.2107497],[-8.6669774,9.2117218],[-8.6673713,9.2125384],[-8.6666622,9.2140938],[-8.6657562,9.2154547],[-8.6643775,9.2158435],[-8.6626442,9.2164657],[-8.6607928,9.2184487],[-8.6595323,9.2209761],[-8.659611,9.2230369],[-8.6588626,9.2238535],[-8.6577202,9.2245922],[-8.6551203,9.2232702],[-8.6547658,9.2236979],[-8.6554749,9.2251755],[-8.6552779,9.2266141],[-8.6542537,9.2287138],[-8.6529538,9.2295692],[-8.6509448,9.2282472],[-8.6498024,9.2280528],[-8.6482267,9.2292192],[-8.6484631,9.2309689],[-8.6477934,9.2321354],[-8.6479116,9.2340795],[-8.6498812,9.2366068],[-8.6499994,9.238162],[-8.6485813,9.2419724],[-8.6453377,9.2442],[-8.6437893,9.2437327],[-8.642865,9.2438468],[-8.6420693,9.2443676],[-8.6411712,9.2465656],[-8.6405769,9.2469655],[-8.6402324,9.2474485],[-8.6403028,9.2477381],[-8.6420903,9.2488894],[-8.6425098,9.2494246],[-8.6425013,9.2500827],[-8.6429527,9.252004],[-8.6442152,9.2541415],[-8.6451799,9.255024],[-8.6457713,9.2558455],[-8.6464061,9.2563607],[-8.6469618,9.257127],[-8.6470096,9.2577292],[-8.6467747,9.2581361],[-8.6456815,9.2588343],[-8.6454249,9.2592033],[-8.6453446,9.2597006],[-8.6466401,9.2603295],[-8.6480616,9.2602187],[-8.648669,9.2605934],[-8.6496759,9.2613977],[-8.6499197,9.261951],[-8.6498985,9.2630576],[-8.6499968,9.2639486],[-8.6498634,9.2643709],[-8.6492953,9.2649626],[-8.648321,9.2655605],[-8.6478386,9.2655504],[-8.6473584,9.2648781],[-8.6455441,9.2638878],[-8.6440291,9.2634191],[-8.6431134,9.2639101],[-8.6424692,9.2645603],[-8.6412483,9.2657239],[-8.6404573,9.2662655],[-8.6384224,9.2670166],[-8.6373489,9.2671507],[-8.6360425,9.2671057],[-8.6349285,9.2673621],[-8.633174,9.2683734],[-8.6328444,9.2694669],[-8.6327511,9.2707256],[-8.6331227,9.2712289],[-8.6334941,9.271365],[-8.6349801,9.2713033],[-8.6365995,9.2721641],[-8.6367745,9.2725975],[-8.6358226,9.2746339],[-8.6348366,9.2759935],[-8.6330466,9.2759524],[-8.6323287,9.2769664],[-8.631949,9.277824],[-8.6320081,9.2790346],[-8.6328693,9.2803425],[-8.6331872,9.2813751],[-8.6358401,9.2837287],[-8.6375076,9.2858647],[-8.6374343,9.2866491],[-8.6367344,9.2880968],[-8.6344809,9.2902135],[-8.6341165,9.2908769],[-8.6338108,9.2919933],[-8.6328102,9.2928235],[-8.6317441,9.2929185],[-8.6309165,9.2927495],[-8.6299191,9.2919596],[-8.6297525,9.2912832],[-8.6301163,9.2885343],[-8.6306341,9.2879688],[-8.6312145,9.2871435],[-8.6315755,9.2861958],[-8.6313613,9.2854571],[-8.6308211,9.2849397],[-8.6303417,9.2849977],[-8.6294947,9.2857309],[-8.6282877,9.2858842],[-8.6273826,9.2868131],[-8.6262178,9.2874863],[-8.6254352,9.2876109],[-8.6249659,9.2878405],[-8.6246164,9.2884842],[-8.6242782,9.2895708],[-8.6236645,9.2909107],[-8.6226841,9.2924603],[-8.6214892,9.2946524],[-8.6212476,9.2957856],[-8.6212153,9.2964513],[-8.6215527,9.2977287],[-8.6222716,9.2990072],[-8.6231818,9.3008412],[-8.6234844,9.3018469],[-8.6233507,9.3022266],[-8.6229196,9.3024755],[-8.622476,9.3024893],[-8.6217973,9.3022407],[-8.6209619,9.3016148],[-8.6203681,9.3006217],[-8.6198244,9.2999066],[-8.6189248,9.2996878],[-8.6183226,9.2998389],[-8.6177827,9.3011016],[-8.6170169,9.3018527],[-8.6146039,9.3033454],[-8.6140242,9.3040316],[-8.6131528,9.3046994],[-8.6108422,9.3058302],[-8.61078,9.3065344],[-8.6113313,9.3081884],[-8.6113521,9.3093748],[-8.6117549,9.3126128],[-8.6121506,9.3135877],[-8.6123458,9.3148343],[-8.6122361,9.3157438],[-8.6118133,9.3167088],[-8.6107711,9.3179218],[-8.6105509,9.3185162],[-8.6104308,9.3212102],[-8.6114943,9.3228225],[-8.6114352,9.324344],[-8.6117755,9.3246824],[-8.6123864,9.3244674],[-8.6135314,9.3232372],[-8.6141191,9.322699],[-8.6147019,9.3226514],[-8.6153536,9.3229125],[-8.6158105,9.3234922],[-8.616092,9.3242447],[-8.6170934,9.3252059],[-8.617226,9.3256535],[-8.6171894,9.3260269],[-8.6161393,9.3275769],[-8.6150407,9.3288888],[-8.6149662,9.3293484],[-8.6151574,9.3295358],[-8.6160062,9.3295191],[-8.6177092,9.329125],[-8.6202232,9.3290649],[-8.6220165,9.3284812],[-8.6225259,9.3285646],[-8.622619,9.3288929],[-8.6223393,9.3300915],[-8.6216273,9.33116],[-8.6207657,9.3318314],[-8.6203737,9.3327252],[-8.620141,9.3338699],[-8.6202198,9.3350877],[-8.6205593,9.336098],[-8.6217193,9.3385728],[-8.6217471,9.3394373],[-8.6214868,9.3398134],[-8.6207719,9.3399532],[-8.6198816,9.3404203],[-8.6191493,9.3413143],[-8.6188115,9.3421339],[-8.6186997,9.3429966],[-8.6189887,9.3437725],[-8.6194497,9.3442117],[-8.6203491,9.3444962],[-8.621549,9.3443878],[-8.6225419,9.3434945],[-8.6229686,9.3433299],[-8.6235267,9.3435853],[-8.6244316,9.3449716],[-8.6248936,9.3460557],[-8.6248921,9.3472757],[-8.6251271,9.3480346],[-8.6262788,9.3493675],[-8.6262412,9.349918],[-8.6260471,9.3502333],[-8.6257125,9.3502012],[-8.6247734,9.3497664],[-8.6228065,9.3495917],[-8.6224054,9.3497168],[-8.6219793,9.3502496],[-8.6217157,9.3507838],[-8.6217968,9.3537993],[-8.6220784,9.3562153],[-8.6220305,9.3572647],[-8.6215949,9.3588434],[-8.6213722,9.3602119],[-8.6215762,9.3612631],[-8.6216989,9.3627653],[-8.621301,9.364404],[-8.6206839,9.3659974],[-8.6192714,9.3679676],[-8.6193982,9.3688353],[-8.6197754,9.3700055],[-8.6209776,9.371356],[-8.6212184,9.3720635],[-8.6212463,9.3728574],[-8.6209263,9.3743091],[-8.619695,9.3758783],[-8.6196377,9.3766303],[-8.6198958,9.3772323],[-8.6205923,9.3777908],[-8.6216479,9.377819],[-8.6226472,9.3773156],[-8.6233879,9.3759217],[-8.6239535,9.3756527],[-8.6245184,9.3756855],[-8.6252086,9.3760394],[-8.6264496,9.3774834],[-8.6267638,9.3781424],[-8.6275762,9.3791962],[-8.627994,9.380046],[-8.6279787,9.3809515],[-8.6272996,9.3826972],[-8.6267681,9.3833217],[-8.6260683,9.3835571],[-8.624932,9.3834636],[-8.624184,9.3835861],[-8.6225925,9.3841764],[-8.6215162,9.384249],[-8.6203961,9.3844697],[-8.6195541,9.3849684],[-8.6183801,9.3862022],[-8.6180867,9.3868327],[-8.6181441,9.3872962],[-8.6184988,9.3875645],[-8.6195862,9.3875546],[-8.620496,9.3882514],[-8.6213752,9.3893948],[-8.6220074,9.3912467],[-8.6232749,9.3924331],[-8.6243311,9.3935126],[-8.6247172,9.3946167],[-8.6252265,9.3952555],[-8.6259818,9.3956186],[-8.6273268,9.3954546],[-8.6290162,9.395519],[-8.6303115,9.3961266],[-8.6307174,9.3959308],[-8.6307518,9.3948641],[-8.6310805,9.3944089],[-8.631525,9.3943513],[-8.6319987,9.3950677],[-8.6332951,9.3964203],[-8.6342596,9.3977171],[-8.63565,9.3993346],[-8.6364768,9.4006047],[-8.6363164,9.4011912],[-8.6351392,9.4011464],[-8.6333795,9.4012374],[-8.6322339,9.4007184],[-8.6314264,9.3999337],[-8.6310639,9.3987225],[-8.6306792,9.398262],[-8.6298164,9.3980099],[-8.6291415,9.3981655],[-8.6288939,9.3984519],[-8.6292158,9.3988884],[-8.6294374,9.3998252],[-8.629324,9.4006877],[-8.6286016,9.4018608],[-8.6282425,9.4026692],[-8.6278801,9.4049338],[-8.6279749,9.4060799],[-8.627939,9.4076431],[-8.6277495,9.4094534],[-8.6272569,9.4098103],[-8.6268271,9.4096647],[-8.6263358,9.4089436],[-8.6247672,9.407654],[-8.6240977,9.4075089],[-8.6238469,9.4076811],[-8.6237088,9.4080261],[-8.6238543,9.4083769],[-8.6243334,9.4085946],[-8.6249431,9.4090552],[-8.625243,9.4097987],[-8.6245886,9.4108939],[-8.6245188,9.4118698],[-8.624846,9.4123698],[-8.6253959,9.4131221],[-8.6255433,9.4160921],[-8.6258467,9.4168582],[-8.6265102,9.4175649],[-8.6281145,9.4190358],[-8.6299499,9.4213779],[-8.630784,9.4229134],[-8.6309019,9.4236721],[-8.6305313,9.424968],[-8.6302833,9.4266754],[-8.630397,9.4282288],[-8.6307521,9.4292789],[-8.6316474,9.4303978],[-8.6319853,9.4312117],[-8.6318764,9.4319066],[-8.6311886,9.4330798],[-8.6306639,9.4333854],[-8.6297882,9.4331047],[-8.6289338,9.4331316],[-8.628394,9.4334564],[-8.626889,9.4352791],[-8.6260151,9.4368919],[-8.6249339,9.4379208],[-8.6244255,9.4387809],[-8.6248156,9.4404475],[-8.6256391,9.4413489],[-8.6270205,9.443496],[-8.6289725,9.4454945],[-8.6301707,9.4478435],[-8.6303874,9.4491832],[-8.6308342,9.4499573],[-8.6344651,9.4534944],[-8.6365183,9.4551058],[-8.6365716,9.4556188],[-8.6363692,9.4561722],[-8.6350747,9.4584043],[-8.6340365,9.4582869],[-8.6323389,9.458519],[-8.6304135,9.459126],[-8.6284668,9.4600964],[-8.6279733,9.4610761],[-8.6269267,9.4637134],[-8.6268615,9.4643575],[-8.6271997,9.4649189],[-8.6280702,9.4671602],[-8.6282021,9.4687173],[-8.6278773,9.469339],[-8.6267402,9.4699203],[-8.6243809,9.4704847],[-8.619979,9.469177],[-8.6191559,9.4692103],[-8.6185419,9.4693691],[-8.6182937,9.4697382],[-8.6182637,9.4702417],[-8.6188665,9.472466],[-8.6196204,9.4744075],[-8.6208017,9.4761783],[-8.6223836,9.4768919],[-8.6227291,9.4774707],[-8.6225674,9.4781212],[-8.621823,9.4792204],[-8.6215241,9.4800413],[-8.6215735,9.4812641],[-8.6218502,9.4829801],[-8.6217852,9.4850308],[-8.6212818,9.4862582],[-8.6204692,9.4877544],[-8.6190542,9.4893179],[-8.6185283,9.4905953],[-8.6185298,9.4917829],[-8.6183145,9.4923106],[-8.6169407,9.4932083],[-8.6158942,9.4933255],[-8.6151242,9.4935934],[-8.6053695,9.4624711],[-8.5910692,9.4543678],[-8.5843755,9.4339584],[-8.577986,9.4399613],[-8.5576005,9.4432628],[-8.5539494,9.4759763],[-8.5414747,9.483779],[-8.5329554,9.4726751],[-8.522002,9.4870802],[-8.5140912,9.4951827],[-8.4970526,9.489781],[-8.4833609,9.5110873],[-8.4937057,9.531492],[-8.4845779,9.5413939],[-8.4593243,9.5401936],[-8.4365047,9.5296916],[-8.3917783,9.563897],[-8.3537457,9.5785982],[-8.2426905,9.5854986],[-8.1436061,9.5846699],[-8.1431412,9.5842614],[-8.1427554,9.5843363],[-8.1425046,9.5849603],[-8.1421222,9.5851275],[-8.1408283,9.5850385],[-8.1401924,9.5852037],[-8.139477,9.5850859],[-8.1389599,9.5846151],[-8.1385621,9.5837204],[-8.1386988,9.5831404],[-8.1386328,9.5823923],[-8.1384081,9.5819149],[-8.1377229,9.5797787],[-8.1367544,9.5791751],[-8.1365475,9.5788332],[-8.1367837,9.5777795],[-8.1363247,9.5770589],[-8.1351171,9.5765809],[-8.1348595,9.5752153],[-8.1351877,9.5748544],[-8.1364753,9.5742032],[-8.136798,9.5737434],[-8.1363867,9.5735002],[-8.1362305,9.5732724],[-8.1363441,9.572981],[-8.1366457,9.5728349],[-8.1371895,9.5723177],[-8.1372459,9.5719138],[-8.1369055,9.5716015],[-8.1371593,9.5706621],[-8.1371233,9.5703867],[-8.1368221,9.5699798],[-8.1363243,9.569954],[-8.1355759,9.5703772],[-8.1353693,9.5704057],[-8.1351583,9.5700455],[-8.1348799,9.569104],[-8.1348801,9.5680799],[-8.1346695,9.5673271],[-8.1348267,9.5664503],[-8.1346109,9.5653431],[-8.1347723,9.5651319],[-8.1355244,9.5650975],[-8.1360044,9.5648695],[-8.1364567,9.564077],[-8.1367564,9.5632135],[-8.1370992,9.5624222],[-8.1374382,9.5623088],[-8.1378707,9.5625073],[-8.1380492,9.5631177],[-8.1383727,9.5631713],[-8.1390194,9.5622731],[-8.1403907,9.5627059],[-8.1415547,9.5623911],[-8.1426152,9.5624874],[-8.1430363,9.5621636],[-8.143016,9.5613493],[-8.1432263,9.5605872],[-8.1431134,9.5600695],[-8.1422744,9.5597116],[-8.1418936,9.5591823],[-8.1421393,9.5584924],[-8.142059,9.557904],[-8.1414995,9.5574874],[-8.140317,9.5575514],[-8.139672,9.5570718],[-8.1395464,9.5563354],[-8.1397452,9.5552345],[-8.1403614,9.5545455],[-8.1415121,9.5548576],[-8.1418773,9.5547683],[-8.1420385,9.5543483],[-8.1423869,9.5539377],[-8.1425417,9.55294],[-8.1420545,9.5525684],[-8.1419399,9.5521521],[-8.1425351,9.5517045],[-8.1435785,9.5501735],[-8.1437533,9.5496013],[-8.143412,9.5489903],[-8.1422911,9.5481199],[-8.1401591,9.5470011],[-8.1399081,9.546392],[-8.1400461,9.5458039],[-8.1407349,9.5453409],[-8.1407553,9.5449584],[-8.1404897,9.5447311],[-8.1399625,9.5447623],[-8.1397057,9.5454054],[-8.1390753,9.5458647],[-8.1385269,9.5458012],[-8.1376467,9.545195],[-8.1375541,9.5444429],[-8.1368011,9.5430494],[-8.1371339,9.5425881],[-8.1377115,9.5422409],[-8.1384057,9.5420146],[-8.1393411,9.5419709],[-8.1396053,9.5414553],[-8.1396537,9.5411003],[-8.1392135,9.5407283],[-8.1387157,9.5406534],[-8.1384691,9.5412078],[-8.1381367,9.5415422],[-8.1377069,9.5415836],[-8.1374879,9.5413666],[-8.1376143,9.5405857],[-8.1372743,9.5401992],[-8.1365813,9.5401749],[-8.1364223,9.5398153],[-8.1377207,9.5392431],[-8.1385725,9.5388605],[-8.1392299,9.5384737],[-8.1395297,9.5378346],[-8.139237,9.5375152],[-8.1387931,9.5374775],[-8.1385869,9.5372542],[-8.1388368,9.5369525],[-8.1389903,9.5364987],[-8.1388539,9.5348832],[-8.1386268,9.5343925],[-8.1379965,9.5339992],[-8.1378429,9.533657],[-8.1380083,9.5333327],[-8.1382091,9.5332485],[-8.1383917,9.5334996],[-8.1386875,9.5337906],[-8.1389575,9.5345638],[-8.1392316,9.5346796],[-8.1397619,9.5343445],[-8.1395743,9.5335469],[-8.1392999,9.5335988],[-8.1390781,9.5334659],[-8.1392275,9.5329508],[-8.1402811,9.53233],[-8.1404859,9.5317402],[-8.1403511,9.5307649],[-8.1401573,9.5299827],[-8.1395431,9.5294629],[-8.1389708,9.5288821],[-8.1387723,9.5281854],[-8.1383849,9.5279122],[-8.137487,9.5278535],[-8.1369363,9.5280639],[-8.1368605,9.5285392],[-8.1370513,9.5299002],[-8.1366751,9.5303513],[-8.1360832,9.5304172],[-8.135361,9.5301996],[-8.1344984,9.5296021],[-8.1334034,9.5278058],[-8.1330568,9.5270132],[-8.1320268,9.5260984],[-8.1314242,9.5257951],[-8.1302069,9.5262977],[-8.1294567,9.5262965],[-8.1284724,9.5258834],[-8.127822,9.5251034],[-8.1272269,9.524857],[-8.1253769,9.5243905],[-8.124261,9.523974],[-8.1241833,9.5238013],[-8.1243314,9.5235954],[-8.1244846,9.523206],[-8.12427,9.522918],[-8.1233321,9.5226659],[-8.1232546,9.5222751],[-8.1239191,9.5208491],[-8.1238951,9.520449],[-8.1240872,9.5203936],[-8.1246763,9.5206001],[-8.1263295,9.5210643],[-8.126737,9.5207935],[-8.126363,9.520124],[-8.1257538,9.519718],[-8.1256809,9.5193034],[-8.1260207,9.5183874],[-8.1264704,9.5185389],[-8.1270845,9.5185438],[-8.1276013,9.5180947],[-8.127615,9.517754],[-8.1270383,9.5173136],[-8.1265352,9.5175081],[-8.1261611,9.5170106],[-8.1257298,9.5169928],[-8.1255735,9.5166999],[-8.1255687,9.5163651],[-8.1262267,9.5160803],[-8.1266202,9.5150614],[-8.1271202,9.5145493],[-8.1275949,9.5142682],[-8.1277949,9.5146147],[-8.1280031,9.51487],[-8.1283901,9.5146509],[-8.1284179,9.514189],[-8.1273149,9.5137228],[-8.1271274,9.5131589],[-8.1273378,9.5127315],[-8.1278495,9.5119971],[-8.1283731,9.511658],[-8.1292862,9.5113793],[-8.1293883,9.5107873],[-8.1292699,9.5103822],[-8.1286189,9.5102034],[-8.1280344,9.5104974],[-8.1276489,9.5104838],[-8.1275082,9.5102195],[-8.1277782,9.5097045],[-8.1277186,9.5091065],[-8.1281845,9.5083122],[-8.1285977,9.5081017],[-8.128742,9.5079582],[-8.1287763,9.5076485],[-8.1284741,9.5071475],[-8.1279602,9.5067963],[-8.1274396,9.506779],[-8.126102,9.5071579],[-8.125289,9.50764],[-8.1245926,9.5076135],[-8.1242089,9.5073147],[-8.1240851,9.5068584],[-8.124443,9.5063787],[-8.1241101,9.5053529],[-8.1243289,9.5045252],[-8.1241147,9.5039351],[-8.1244751,9.5038274],[-8.1240581,9.5025699],[-8.1240791,9.5021389],[-8.1243991,9.5019349],[-8.1241841,9.5015319],[-8.1231581,9.5014679],[-8.1216801,9.5000839],[-8.1216721,9.4994819],[-8.1222121,9.4992779],[-8.1224671,9.4986509],[-8.1226871,9.4971029],[-8.121292,9.4962719],[-8.120098,9.4957049],[-8.118591,9.4946629],[-8.1186251,9.4935579],[-8.117864,9.4932219],[-8.1177091,9.4920989],[-8.1170571,9.4911679],[-8.1180511,9.4909229],[-8.1184271,9.4898959],[-8.1181057,9.4882479],[-8.1180971,9.488204],[-8.1177731,9.4873779],[-8.1168751,9.4871059],[-8.1165581,9.4871399],[-8.1160942,9.4873007],[-8.1161181,9.4876229],[-8.116869,9.4884869],[-8.1164221,9.4885409],[-8.1158901,9.4882839],[-8.1148511,9.4876849],[-8.1146971,9.4872849],[-8.1147721,9.4867089],[-8.1147381,9.4865939],[-8.1142961,9.486163],[-8.1143631,9.4855809],[-8.1156601,9.4843869],[-8.1152401,9.4842549],[-8.1148841,9.4839539],[-8.1148021,9.4840109],[-8.1148661,9.4842649],[-8.1145031,9.4843919],[-8.1143221,9.4843209],[-8.1141071,9.4839209],[-8.1139284,9.483267],[-8.1139571,9.4825849],[-8.1137611,9.4819809],[-8.1131121,9.4811489],[-8.1125291,9.4820859],[-8.1117761,9.4814579],[-8.1114091,9.4810279],[-8.1112391,9.4804229],[-8.110709,9.4805569],[-8.1101151,9.4813259],[-8.1091641,9.4808539],[-8.1087771,9.4803559],[-8.1085155,9.4798122],[-8.1086831,9.4794589],[-8.1079371,9.4783851],[-8.1076711,9.4782219],[-8.1076131,9.4780389],[-8.1077901,9.4778059],[-8.1077231,9.4775649],[-8.1070301,9.4778959],[-8.106699,9.4776909],[-8.1059791,9.4768859],[-8.1050851,9.4762939],[-8.1049681,9.47524],[-8.1046141,9.4742599],[-8.1049361,9.4735909],[-8.105843,9.4728769],[-8.1060191,9.4724829],[-8.1059681,9.4721639],[-8.1057121,9.4718779],[-8.1049601,9.4714289],[-8.103727,9.4699739],[-8.102299,9.4695019],[-8.1017981,9.4691409],[-8.1012161,9.4680089],[-8.1017161,9.4676239],[-8.1015951,9.4665539],[-8.1021071,9.4662859],[-8.1028201,9.4654999],[-8.102967,9.4644309],[-8.1026871,9.4629519],[-8.102079,9.4616649],[-8.1009671,9.4611989],[-8.100185,9.4617409],[-8.1001711,9.4630629],[-8.097874,9.4626509],[-8.0977441,9.4619829],[-8.0977031,9.4610469],[-8.0974441,9.4602659],[-8.0957641,9.4583349],[-8.0958371,9.4577959],[-8.0963831,9.4578289],[-8.0967471,9.4563379],[-8.0965091,9.4560359],[-8.095226,9.4563159],[-8.09507,9.4559909],[-8.095105,9.4556239],[-8.0949501,9.4554629],[-8.094633,9.4558069],[-8.094177,9.4556169],[-8.093907,9.4554349],[-8.0936521,9.4554139],[-8.091896,9.4545683],[-8.0920614,9.4529979],[-8.090302,9.4514549],[-8.0901271,9.4507179],[-8.089957,9.4494249],[-8.089696,9.4485799],[-8.0895911,9.4478449],[-8.089172,9.4465239],[-8.088319,9.4455719],[-8.087664,9.4446089],[-8.08732,9.4434579],[-8.0870081,9.4427479],[-8.086214,9.4424389],[-8.0856941,9.440939],[-8.0847131,9.43985],[-8.0838571,9.439588],[-8.0831051,9.439166],[-8.0822251,9.438942],[-8.0816391,9.439295],[-8.0808771,9.439204],[-8.0802991,9.438768],[-8.0798591,9.438066],[-8.0784561,9.4377],[-8.0777331,9.437372],[-8.0772011,9.435882],[-8.0773051,9.435236],[-8.0771371,9.434942],[-8.0763151,9.434594],[-8.0758071,9.434252],[-8.0753961,9.433553],[-8.0747371,9.433697],[-8.0743011,9.433923],[-8.0739291,9.433855],[-8.0735321,9.433463],[-8.0734801,9.432372],[-8.0727691,9.431831],[-8.0726511,9.431412],[-8.0728621,9.430221],[-8.0714991,9.428138],[-8.0708311,9.427587],[-8.0703891,9.427134],[-8.0699021,9.426399],[-8.0693771,9.425971],[-8.0683601,9.425472],[-8.0680531,9.425204],[-8.0676961,9.424762],[-8.0671941,9.424478],[-8.0665231,9.424281],[-8.0658901,9.424558],[-8.0655171,9.425057],[-8.0654681,9.425757],[-8.0653401,9.426095],[-8.0647611,9.426289],[-8.0638081,9.425993],[-8.0633551,9.425319],[-8.0623291,9.424103],[-8.0619561,9.423849],[-8.0607671,9.424115],[-8.0599031,9.422499],[-8.0589021,9.421564],[-8.0582451,9.421062],[-8.0576301,9.420756],[-8.0570971,9.421039],[-8.0567471,9.421115],[-8.0565071,9.420041],[-8.0551681,9.420309],[-8.0549341,9.420042],[-8.0553141,9.418906],[-8.0553491,9.417801],[-8.0547631,9.416908],[-8.0538071,9.416022],[-8.0527561,9.415567],[-8.0515031,9.415454],[-8.0505041,9.416338],[-8.0494621,9.416434],[-8.0489191,9.415916],[-8.0487041,9.415087],[-8.0477161,9.414251],[-8.0466721,9.414177],[-8.0464581,9.413995],[-8.0467651,9.413392],[-8.0465941,9.412986],[-8.0459171,9.412549],[-8.0451041,9.411385],[-8.0449661,9.410836],[-8.0454021,9.410237],[-8.0455321,9.409832],[-8.0450691,9.409308],[-8.0439561,9.408863],[-8.0433231,9.408392],[-8.0434851,9.407934],[-8.0428531,9.407689],[-8.0422911,9.407632],[-8.0419331,9.407525],[-8.0416481,9.407159],[-8.0409911,9.407287],[-8.0406761,9.40697],[-8.0398271,9.40747],[-8.0389971,9.407553],[-8.0386221,9.407154],[-8.0386181,9.406656],[-8.0381181,9.406253],[-8.0378111,9.406125],[-8.0376801,9.405947],[-8.0382021,9.405359],[-8.0378901,9.404097],[-8.0378791,9.403377],[-8.0378151,9.402711],[-8.0376481,9.402112],[-8.0368911,9.401124],[-8.0360141,9.399761],[-8.0351921,9.399103],[-8.0354061,9.398615],[-8.0360781,9.39837],[-8.0359261,9.396462],[-8.0350851,9.395482],[-8.0340071,9.395057],[-8.0331441,9.395008],[-8.0319131,9.395354],[-8.0301521,9.396306],[-8.0287251,9.396354],[-8.0275291,9.396264],[-8.0259651,9.396711],[-8.0239321,9.397384],[-8.0221381,9.397908],[-8.0211561,9.397217],[-8.0202391,9.396796],[-8.0188991,9.395941],[-8.0177711,9.395369],[-8.0164681,9.395199],[-8.0152051,9.395541],[-8.0132531,9.395963],[-8.0126521,9.396642],[-8.0125021,9.396982],[-8.0119311,9.397715],[-8.0105521,9.398777],[-8.0096791,9.39963],[-8.0089741,9.400153],[-8.0082841,9.400865],[-8.0073031,9.401583],[-8.0057781,9.403104],[-8.0050311,9.403091],[-8.0034311,9.402754],[-8.0018791,9.402295],[-8.0002901,9.401565],[-7.9987911,9.400137],[-7.9966731,9.39821],[-7.9958081,9.398248],[-7.9949351,9.398465],[-7.9943541,9.398774],[-7.9936691,9.399007],[-7.9931191,9.399458],[-7.9921871,9.399587],[-7.9915731,9.3992],[-7.9901341,9.399469],[-7.9893681,9.399518],[-7.9879861,9.399271],[-7.9875311,9.399395],[-7.9866291,9.398726],[-7.9859101,9.398427],[-7.9854661,9.398186],[-7.9848861,9.398068],[-7.9843721,9.398069],[-7.9838961,9.398162],[-7.9826941,9.398686],[-7.9817421,9.398876],[-7.9811471,9.398733],[-7.9799581,9.398757],[-7.9792911,9.399138],[-7.9781731,9.399542],[-7.9774351,9.399518],[-7.9767451,9.399114],[-7.9754131,9.398543],[-7.9748601,9.398513],[-7.9681361,9.400767],[-7.9650081,9.402765],[-7.9577151,9.408501],[-7.9548451,9.410089],[-7.9510501,9.410787],[-7.9491781,9.411202],[-7.9467361,9.411983],[-7.9437251,9.412686],[-7.9419431,9.413001],[-7.9386771,9.413915],[-7.9369651,9.414198],[-7.9340311,9.414427],[-7.9275971,9.413496],[-7.9259521,9.413196],[-7.9250191,9.413193],[-7.9239871,9.413504],[-7.9231681,9.414274],[-7.9224401,9.41513],[-7.9221091,9.41571],[-7.9210661,9.416845],[-7.9205711,9.417994],[-7.9205151,9.419181],[-7.9188601,9.420348],[-7.9178841,9.421205],[-7.9170041,9.421681],[-7.9163381,9.421968],[-7.9151631,9.421732],[-7.9143261,9.421079],[-7.9126501,9.42051],[-7.9106491,9.42021],[-7.9090591,9.420321],[-7.9084081,9.420255],[-7.9076741,9.420333],[-7.9070741,9.420614],[-7.9067711,9.421187],[-7.9048491,9.420945],[-7.9041231,9.42102],[-7.9037181,9.420583],[-7.9035061,9.420891],[-7.9018381,9.420425],[-7.9013281,9.420526],[-7.9011801,9.420705],[-7.8997371,9.4205],[-7.8994691,9.420718],[-7.8993211,9.421042],[-7.8988621,9.42094],[-7.8978731,9.421014],[-7.8973501,9.420943],[-7.8967071,9.421324],[-7.8960331,9.421854],[-7.8946371,9.421157],[-7.8928501,9.420612],[-7.8927211,9.420247],[-7.8921861,9.419872],[-7.8909761,9.419886],[-7.8899261,9.419444],[-7.8880221,9.419515],[-7.8870901,9.419183],[-7.8860341,9.419299],[-7.8855101,9.419448],[-7.8849751,9.420079],[-7.8845761,9.420334],[-7.8832241,9.420319],[-7.8828111,9.4208],[-7.8824301,9.421395],[-7.8813931,9.420863],[-7.8809921,9.421338],[-7.8799771,9.421177],[-7.8789071,9.42147],[-7.8775931,9.42122],[-7.8772501,9.421804],[-7.8762731,9.421559],[-7.8740271,9.421821],[-7.8730031,9.421638],[-7.8722701,9.421823],[-7.8718021,9.422105],[-7.8710681,9.422309],[-7.8704171,9.42227],[-7.8701501,9.422516],[-7.8693741,9.42191],[-7.8690251,9.421885],[-7.8677491,9.422252],[-7.8675161,9.422051],[-7.8675001,9.421903],[-7.8676171,9.42173],[-7.8675891,9.421477],[-7.8673401,9.421155],[-7.8659841,9.421642],[-7.8647141,9.421012],[-7.8647951,9.420742],[-7.8647901,9.420336],[-7.8642431,9.420308],[-7.8625601,9.421013],[-7.8615021,9.421177],[-7.8607841,9.421458],[-7.8596051,9.422019],[-7.8586261,9.421692],[-7.8584891,9.421365],[-7.8566901,9.421282],[-7.8557951,9.421517],[-7.8555561,9.421735],[-7.8555351,9.421893],[-7.8556621,9.422313],[-7.8554911,9.422826],[-7.8548401,9.422899],[-7.8542041,9.422806],[-7.8532731,9.422984],[-7.8530941,9.422913],[-7.8530409,9.4227934],[-7.8533871,9.4220743],[-7.853343,9.4214271],[-7.8532085,9.4211804],[-7.852874,9.4210089],[-7.8526357,9.4213407],[-7.8523439,9.4214655],[-7.8519767,9.421444],[-7.8509159,9.4218791],[-7.8506181,9.422035],[-7.850429,9.4216976],[-7.8501675,9.4214528],[-7.8498084,9.421426],[-7.8496409,9.4215109],[-7.8495252,9.4217065],[-7.8491248,9.4215296],[-7.8489582,9.4212893],[-7.8489365,9.4210854],[-7.8493245,9.4207942],[-7.8497746,9.4206155],[-7.8499945,9.4203755],[-7.8502543,9.4197744],[-7.8501242,9.4194959],[-7.8498444,9.4192333],[-7.8498323,9.4189303],[-7.8500849,9.418475],[-7.8503516,9.4178448],[-7.8514675,9.4177085],[-7.8521053,9.4174287],[-7.8531744,9.4165504],[-7.8542821,9.4158273],[-7.8547532,9.4156359],[-7.8549698,9.4152441],[-7.8548503,9.415024],[-7.8535495,9.4148302],[-7.8530218,9.4148532],[-7.852683,9.4147085],[-7.8518533,9.4136735],[-7.8514086,9.4125554],[-7.8511963,9.4122573],[-7.8511487,9.4119104],[-7.8523511,9.411622],[-7.8524361,9.411225],[-7.8526981,9.411034],[-7.8536371,9.411097],[-7.8541631,9.411044],[-7.8543011,9.410765],[-7.8551641,9.409784],[-7.8556041,9.408316],[-7.8556511,9.40752],[-7.8554471,9.407518],[-7.8551231,9.407633],[-7.8549971,9.407634],[-7.8548901,9.407546],[-7.8551341,9.406902],[-7.8550051,9.406762],[-7.8541766,9.4063076],[-7.8538721,9.406061],[-7.8535991,9.405268],[-7.8536211,9.404633],[-7.8537191,9.403886],[-7.8538461,9.403326],[-7.8541801,9.402806],[-7.8548881,9.401932],[-7.8549571,9.401519],[-7.8541181,9.400443],[-7.8536631,9.399593],[-7.8538641,9.398982],[-7.8542841,9.398731],[-7.8548131,9.39883],[-7.8551601,9.399515],[-7.8554151,9.399508],[-7.8559021,9.398508],[-7.8560861,9.397876],[-7.8559501,9.396924],[-7.8561331,9.396549],[-7.8570771,9.395933],[-7.8578541,9.395058],[-7.8579861,9.394853],[-7.8578041,9.394623],[-7.8566271,9.394304],[-7.8560181,9.393469],[-7.8556931,9.39231],[-7.8560021,9.391784],[-7.8560398,9.3917691],[-7.8566821,9.391515],[-7.8565951,9.390682],[-7.8573141,9.389459],[-7.8574341,9.388913],[-7.8567311,9.38855],[-7.8567081,9.388141],[-7.8571361,9.387937],[-7.8581501,9.387794],[-7.8585391,9.38746],[-7.8588211,9.386848],[-7.8585741,9.386737],[-7.8584291,9.386836],[-7.8583141,9.386849],[-7.8582461,9.386778],[-7.8581961,9.386529],[-7.8583741,9.386148],[-7.8588611,9.386218],[-7.8594111,9.386193],[-7.8596121,9.386085],[-7.8605231,9.385073],[-7.8603121,9.384986],[-7.8599211,9.38503],[-7.8597361,9.384845],[-7.8597511,9.384288],[-7.8607361,9.382002],[-7.8609201,9.381868],[-7.8611121,9.381838],[-7.8622991,9.382138],[-7.8644621,9.38183],[-7.8647071,9.381446],[-7.8641781,9.380741],[-7.8640451,9.379839],[-7.8641999,9.3792555],[-7.8640647,9.3789466],[-7.8638408,9.3787471],[-7.8634488,9.3786538],[-7.8632653,9.3784673],[-7.863133,9.3779455],[-7.8628345,9.3778521],[-7.8622235,9.3782535],[-7.8618142,9.3780054],[-7.861133,9.3769245],[-7.8608953,9.3761141],[-7.8607283,9.3760299],[-7.8602571,9.375952],[-7.860044,9.3756822],[-7.8600421,9.37534],[-7.8599961,9.375067],[-7.8600801,9.374833],[-7.8603031,9.374557],[-7.8611081,9.374644],[-7.8609501,9.373996],[-7.8614681,9.373677],[-7.8622011,9.373592],[-7.8628011,9.374366],[-7.8631761,9.374319],[-7.8633911,9.373853],[-7.8631211,9.373133],[-7.8631331,9.372797],[-7.863712,9.3715686],[-7.8643687,9.370888],[-7.8650131,9.371214],[-7.8658841,9.371127],[-7.8660871,9.371029],[-7.8664551,9.370494],[-7.8671911,9.370026],[-7.8670411,9.369664],[-7.8672771,9.369529],[-7.8676091,9.369528],[-7.8678441,9.36933],[-7.8678671,9.368901],[-7.8680561,9.368557],[-7.8687331,9.368609],[-7.8691041,9.368581],[-7.8695621,9.368419],[-7.8694931,9.368173],[-7.8701911,9.367355],[-7.8706431,9.367418],[-7.8714181,9.367406],[-7.8719761,9.367669],[-7.8723901,9.367501],[-7.8728501,9.36716],[-7.8726021,9.366774],[-7.8729991,9.366558],[-7.8729591,9.366417],[-7.8723911,9.366126],[-7.8722041,9.365934],[-7.8723485,9.3656475],[-7.8726537,9.3653142],[-7.8726761,9.365111],[-7.8724781,9.364871],[-7.8723601,9.364836],[-7.871862,9.3652698],[-7.8701971,9.365572],[-7.8700001,9.365463],[-7.8698321,9.365253],[-7.8695631,9.363112],[-7.8692271,9.362741],[-7.8690461,9.362699],[-7.8687341,9.362761],[-7.8685011,9.362337],[-7.8686761,9.362057],[-7.8690991,9.361868],[-7.8691901,9.361726],[-7.8692023,9.3610908],[-7.86938,9.3607224],[-7.8698006,9.360416],[-7.8701838,9.3604589],[-7.8703763,9.360672],[-7.8704749,9.3612903],[-7.8717587,9.3622704],[-7.8723479,9.3622477],[-7.8732273,9.3618062],[-7.8738908,9.3611254],[-7.874643,9.3602992],[-7.8744601,9.359635],[-7.8736341,9.359238],[-7.8735871,9.35888],[-7.8737031,9.358455],[-7.8736011,9.358326],[-7.8733711,9.358211],[-7.8729701,9.357242],[-7.8732331,9.35691],[-7.8734461,9.356807],[-7.8751771,9.356922],[-7.8754791,9.356729],[-7.8760311,9.356499],[-7.8771841,9.355613],[-7.8772111,9.355386],[-7.8774381,9.354856],[-7.8775441,9.354475],[-7.8774881,9.354314],[-7.8772741,9.354086],[-7.8768191,9.354223],[-7.8764981,9.354165],[-7.8763051,9.353994],[-7.8757641,9.354042],[-7.8755671,9.353982],[-7.8755271,9.353656],[-7.8756871,9.353465],[-7.8766151,9.352861],[-7.8758371,9.352265],[-7.8758851,9.351896],[-7.8763711,9.351669],[-7.8764391,9.351103],[-7.8768691,9.350737],[-7.8771011,9.350341],[-7.8760811,9.348513],[-7.8759501,9.347908],[-7.8760201,9.347539],[-7.8765901,9.347323],[-7.8769041,9.347152],[-7.8770611,9.346825],[-7.8773111,9.346676],[-7.8780811,9.347037],[-7.8787211,9.346788],[-7.8790491,9.345461],[-7.8785971,9.34509],[-7.8781231,9.344825],[-7.8779781,9.344847],[-7.8778901,9.344724],[-7.8780091,9.344515],[-7.8786151,9.344302],[-7.8792591,9.344393],[-7.8800351,9.343401],[-7.8802701,9.342835],[-7.8803391,9.342254],[-7.8797801,9.342038],[-7.8794971,9.341818],[-7.8791121,9.341315],[-7.8785061,9.340725],[-7.8787971,9.340481],[-7.8794341,9.340255],[-7.8811481,9.340072],[-7.8817811,9.339915],[-7.8819891,9.339614],[-7.8806041,9.338445],[-7.8795961,9.337986],[-7.8793631,9.337719],[-7.8795551,9.336776],[-7.8797241,9.336288],[-7.8801301,9.336198],[-7.8809761,9.336412],[-7.8820601,9.335956],[-7.8820541,9.334891],[-7.8818371,9.334051],[-7.8818031,9.333759],[-7.8823101,9.332549],[-7.8824051,9.332209],[-7.8824261,9.331284],[-7.8818521,9.33068],[-7.8817001,9.330258],[-7.8816691,9.32931],[-7.8811611,9.328539],[-7.8802711,9.326532],[-7.8801531,9.32634],[-7.8801031,9.326069],[-7.8805761,9.325885],[-7.8810861,9.32556],[-7.8810011,9.325327],[-7.8806561,9.324851],[-7.8800161,9.324295],[-7.8799281,9.324151],[-7.8799101,9.322593],[-7.8795591,9.321619],[-7.8791161,9.321419],[-7.8789021,9.321053],[-7.8786941,9.32091],[-7.8784651,9.320865],[-7.8777031,9.321142],[-7.8775241,9.32114],[-7.8774601,9.321039],[-7.8775011,9.320862],[-7.8777591,9.320597],[-7.8778081,9.320496],[-7.8777721,9.32036],[-7.8775511,9.320226],[-7.8772501,9.319843],[-7.8770751,9.319312],[-7.8766891,9.318644],[-7.8768451,9.318342],[-7.8777731,9.317501],[-7.8781051,9.316071],[-7.8775501,9.31595],[-7.8774761,9.31561],[-7.8777411,9.314736],[-7.8779351,9.31375],[-7.8783131,9.31356],[-7.8785331,9.313118],[-7.8796131,9.312608],[-7.8805861,9.311909],[-7.8800151,9.311628],[-7.8797411,9.311398],[-7.8798591,9.310977],[-7.8798811,9.310627],[-7.8797401,9.310454],[-7.8794701,9.310317],[-7.8791421,9.310334],[-7.8788691,9.310509],[-7.8787021,9.310484],[-7.8786591,9.309933],[-7.8787141,9.309244],[-7.8777121,9.307831],[-7.8776031,9.307431],[-7.8779961,9.305712],[-7.8782241,9.305009],[-7.8783271,9.304498],[-7.8781501,9.304221],[-7.8773651,9.303765],[-7.8769571,9.303445],[-7.8772361,9.301104],[-7.8770131,9.300534],[-7.8761071,9.300407],[-7.8748551,9.300802],[-7.8744321,9.300514],[-7.8739341,9.298997],[-7.8744291,9.298283],[-7.8751271,9.297991],[-7.8759741,9.297983],[-7.8771851,9.29815],[-7.8774761,9.297914],[-7.8775871,9.297145],[-7.8774741,9.295998],[-7.8765661,9.294807],[-7.8763601,9.294167],[-7.8764191,9.293348],[-7.8766961,9.292913],[-7.8771121,9.292541],[-7.8780581,9.292668],[-7.8779181,9.293288],[-7.8787161,9.293592],[-7.8792251,9.293572],[-7.8797521,9.293199],[-7.8803751,9.292089],[-7.8808921,9.291849],[-7.8813131,9.292217],[-7.8809781,9.292758],[-7.8812631,9.292948],[-7.8827401,9.291664],[-7.8826011,9.29124],[-7.8826251,9.291042],[-7.8829301,9.290647],[-7.8832481,9.290688],[-7.8836491,9.29045],[-7.8837781,9.29018],[-7.8836961,9.289947],[-7.8836391,9.289552],[-7.8839501,9.288312],[-7.8846141,9.287593],[-7.8851611,9.287204],[-7.8868541,9.286547],[-7.8880711,9.285952],[-7.8886831,9.2851],[-7.8889351,9.284524],[-7.8876451,9.28436],[-7.8872461,9.28394],[-7.8863091,9.283505],[-7.8856381,9.283816],[-7.8846431,9.283628],[-7.8834351,9.283027],[-7.8837431,9.282026],[-7.8841391,9.281417],[-7.8848241,9.281257],[-7.8888001,9.281895],[-7.8890541,9.281564],[-7.8888091,9.28103],[-7.8890051,9.280266],[-7.8897251,9.280201],[-7.8899791,9.279808],[-7.8902781,9.27838],[-7.8913041,9.277672],[-7.8914401,9.276456],[-7.8918081,9.275601],[-7.8918141,9.275216],[-7.8912151,9.274375],[-7.8912251,9.274021],[-7.8911371,9.273484],[-7.8907371,9.273147],[-7.8905931,9.272765],[-7.8907961,9.272272],[-7.8911811,9.272046],[-7.8913831,9.272087],[-7.8917421,9.272365],[-7.8936771,9.272151],[-7.8938671,9.271916],[-7.8946881,9.271748],[-7.8949171,9.271393],[-7.8952061,9.270657],[-7.8945411,9.270058],[-7.8946971,9.269258],[-7.8953231,9.267967],[-7.8954121,9.267488],[-7.8956461,9.266968],[-7.8961491,9.266579],[-7.8963941,9.266192],[-7.8964071,9.265853],[-7.8965611,9.265555],[-7.8967091,9.265024],[-7.8967221,9.264373],[-7.8970231,9.263747],[-7.8973781,9.263149],[-7.8976301,9.262595],[-7.8979941,9.262078],[-7.8990331,9.262292],[-7.8990971,9.262017],[-7.8987601,9.261825],[-7.8985671,9.261475],[-7.8985351,9.261007],[-7.8987181,9.260798],[-7.8992061,9.26069],[-7.8995841,9.261017],[-7.8999751,9.260792],[-7.9000621,9.260558],[-7.9000011,9.26017],[-7.8997471,9.259917],[-7.8994371,9.259681],[-7.8985591,9.25945],[-7.8984971,9.259213],[-7.8986491,9.258984],[-7.8990631,9.258594],[-7.8991101,9.258394],[-7.8986261,9.258389],[-7.8981171,9.258476],[-7.8978921,9.258272],[-7.8978851,9.25792],[-7.8980751,9.257477],[-7.8985721,9.256952],[-7.8997901,9.256866],[-7.9001441,9.256593],[-7.9004201,9.256166],[-7.9004661,9.255828],[-7.9004161,9.255494],[-7.8995481,9.25533],[-7.8996141,9.255063],[-7.8998071,9.254839],[-7.8999401,9.254498],[-7.8998341,9.253841],[-7.9000511,9.253246],[-7.9000141,9.253014],[-7.9002051,9.252817],[-7.9009411,9.252252],[-7.9007891,9.251651],[-7.9009511,9.251155],[-7.9012611,9.250905],[-7.9015121,9.250508],[-7.9020881,9.250206],[-7.9026081,9.250143],[-7.902936,9.2499788],[-7.9031281,9.249747],[-7.9036992,9.2490585],[-7.9041831,9.2484765],[-7.9041321,9.248033],[-7.9038281,9.248036],[-7.9037891,9.247887],[-7.9038091,9.247423],[-7.9045831,9.246165],[-7.9047341,9.245684],[-7.9044271,9.24524],[-7.9043152,9.2446775],[-7.9047407,9.2442896],[-7.9047372,9.2436052],[-7.9053091,9.243182],[-7.9060221,9.242957],[-7.9062061,9.242479],[-7.9060201,9.242029],[-7.9057358,9.241502],[-7.9059022,9.2408479],[-7.9055162,9.2396668],[-7.9058533,9.2393009],[-7.9068191,9.239124],[-7.9084001,9.239293],[-7.9097551,9.238692],[-7.9098581,9.238366],[-7.9097761,9.238218],[-7.9095051,9.238281],[-7.9092861,9.238159],[-7.9088281,9.237094],[-7.9092881,9.237006],[-7.9098062,9.2365685],[-7.9110902,9.2361797],[-7.9113671,9.23566],[-7.9117019,9.2341747],[-7.9110725,9.2332397],[-7.9108821,9.232522],[-7.9110876,9.2323346],[-7.911535,9.2325941],[-7.9117617,9.2324191],[-7.9118647,9.2320959],[-7.9116732,9.2319422],[-7.910947,9.2316839],[-7.9110321,9.230182],[-7.9112481,9.229825],[-7.9137715,9.229052],[-7.9146217,9.2276245],[-7.9145198,9.2273051],[-7.9141826,9.2272338],[-7.9140357,9.226757],[-7.9142281,9.225927],[-7.9145641,9.225307],[-7.9147921,9.224986],[-7.9159324,9.223963],[-7.9160743,9.2233675],[-7.9164011,9.223266],[-7.9167471,9.223002],[-7.9176041,9.222544],[-7.9180447,9.2225338],[-7.918065,9.2228779],[-7.918252,9.2230368],[-7.918576,9.2228556],[-7.9188961,9.222336],[-7.9189784,9.2217763],[-7.919337,9.2212496],[-7.9192638,9.2209549],[-7.9186861,9.220884],[-7.9188185,9.2201432],[-7.9187194,9.2196681],[-7.9193613,9.2193078],[-7.9194061,9.218746],[-7.91908,9.2179689],[-7.9188114,9.2175122],[-7.9188062,9.2170607],[-7.918492,9.2164174],[-7.9187225,9.2155244],[-7.9203174,9.2146427],[-7.9208354,9.2149707],[-7.921439,9.2151347],[-7.9217245,9.2149411],[-7.9217887,9.2139572],[-7.92253,9.2140939],[-7.9229003,9.2137684],[-7.9230578,9.2132044],[-7.9224979,9.2129836],[-7.9213605,9.2128561],[-7.9209323,9.2122869],[-7.9205267,9.2125529],[-7.9200956,9.212361],[-7.9201381,9.210776],[-7.9200401,9.209789],[-7.9197611,9.208766],[-7.9195351,9.208625],[-7.9189841,9.209095],[-7.9182781,9.209122],[-7.9178821,9.208671],[-7.9174211,9.206962],[-7.9171531,9.206683],[-7.9167121,9.206342],[-7.9165161,9.205812],[-7.9165721,9.205368],[-7.9165721,9.204458],[-7.9169271,9.204261],[-7.9165281,9.202449],[-7.9166871,9.2019993],[-7.9168321,9.20159],[-7.9164571,9.201391],[-7.9160579,9.200275],[-7.9161537,9.1994929],[-7.9161162,9.1990851],[-7.9157855,9.1988031],[-7.9158587,9.1984391],[-7.9158314,9.1981128],[-7.9160089,9.1977189],[-7.9159974,9.1972895],[-7.9159016,9.1969246],[-7.9161721,9.1963317],[-7.916128,9.1959753],[-7.915966,9.1957543],[-7.9161216,9.1954472],[-7.9161645,9.1952301],[-7.915966,9.1951347],[-7.9156763,9.1952936],[-7.9154456,9.1952565],[-7.9152091,9.195056],[-7.9152948,9.194516],[-7.9144532,9.1942205],[-7.9146455,9.193153],[-7.9138449,9.1925304],[-7.9140613,9.1922353],[-7.9139331,9.1918705],[-7.9143837,9.1913268],[-7.9143484,9.1908442],[-7.9141451,9.190414],[-7.9144781,9.189934],[-7.9144151,9.189365],[-7.9139171,9.188852],[-7.9130855,9.188741],[-7.9123071,9.188377],[-7.9119461,9.187071],[-7.9112854,9.1867539],[-7.9111992,9.1862885],[-7.9108331,9.1860222],[-7.9100802,9.186299],[-7.9096455,9.1858213],[-7.9085441,9.185455],[-7.9085021,9.185126],[-7.9084151,9.184917],[-7.9081741,9.18473],[-7.908091,9.18439],[-7.9086619,9.1843554],[-7.9087611,9.1840854],[-7.9084646,9.183877],[-7.9083661,9.183138],[-7.9078801,9.182479],[-7.9076691,9.181633],[-7.9069781,9.180916],[-7.9060311,9.180782],[-7.9056381,9.180597],[-7.9054871,9.179505],[-7.9053081,9.17877],[-7.9039231,9.178325],[-7.9036291,9.177639],[-7.9026291,9.177305],[-7.9014071,9.177716],[-7.9006481,9.177894],[-7.9004531,9.177812],[-7.9003181,9.177544],[-7.9003891,9.177081],[-7.9002271,9.176069],[-7.8996751,9.175841],[-7.8992741,9.175436],[-7.8991561,9.174903],[-7.8983631,9.174575],[-7.8980731,9.174096],[-7.8981221,9.173677],[-7.8980281,9.173506],[-7.8979131,9.173454],[-7.8973751,9.173777],[-7.8969021,9.173718],[-7.8961181,9.172742],[-7.8959381,9.172686],[-7.8955971,9.172735],[-7.8952751,9.172646],[-7.8950631,9.172264],[-7.8949051,9.171819],[-7.8947041,9.171502],[-7.8944961,9.170865],[-7.8945781,9.170708],[-7.8945281,9.170537],[-7.8942961,9.170449],[-7.8939141,9.170549],[-7.8937761,9.170502],[-7.8936631,9.17],[-7.8920701,9.1692],[-7.8912041,9.168685],[-7.8910591,9.168523],[-7.8909721,9.167978],[-7.8906571,9.16733],[-7.8901661,9.167115],[-7.8899191,9.167201],[-7.8894961,9.166938],[-7.8891541,9.166523],[-7.8889501,9.166426],[-7.8882941,9.166818],[-7.8878031,9.166565],[-7.8870681,9.165266],[-7.8863851,9.164953],[-7.8844691,9.164441],[-7.8840731,9.163922],[-7.8835351,9.1631783],[-7.8833241,9.1626876],[-7.8826849,9.1626483],[-7.8829014,9.1621636],[-7.8826401,9.161609],[-7.8814781,9.161385],[-7.8810261,9.161417],[-7.8790193,9.1612105],[-7.8782761,9.1607191],[-7.8772547,9.1604982],[-7.8769527,9.160763],[-7.8755661,9.160091],[-7.8746041,9.160735],[-7.8730251,9.160363],[-7.8721201,9.1599],[-7.8707741,9.15936],[-7.8701761,9.159018],[-7.8696171,9.159224],[-7.8694191,9.159384],[-7.8685091,9.160376],[-7.8677371,9.161349],[-7.8673211,9.161633],[-7.8667751,9.162279],[-7.8663911,9.162637],[-7.8660471,9.162785],[-7.8653841,9.163202],[-7.8642681,9.163062],[-7.8634821,9.164173],[-7.8626641,9.16371],[-7.8621021,9.163921],[-7.8619861,9.164165],[-7.8619661,9.164493],[-7.8621541,9.164974],[-7.8621154,9.1652887],[-7.8611553,9.1651139],[-7.8601832,9.1651365],[-7.8598571,9.1656277],[-7.8599559,9.1667061],[-7.8592771,9.167245],[-7.8582504,9.1674647],[-7.8567711,9.167484],[-7.8559581,9.168179],[-7.8550711,9.168669],[-7.8550421,9.16949],[-7.8547801,9.170346],[-7.8545171,9.171454],[-7.8542631,9.172178],[-7.8535381,9.172377],[-7.8533411,9.173392],[-7.8526021,9.174319],[-7.8524321,9.175485],[-7.8521461,9.176601],[-7.8501841,9.179103],[-7.8487951,9.179695],[-7.8480711,9.179028],[-7.8473741,9.178573],[-7.8468591,9.178467],[-7.8460711,9.178531],[-7.8444851,9.178449],[-7.8438631,9.178835],[-7.8402561,9.178135],[-7.8398161,9.178156],[-7.8384131,9.178344],[-7.8354811,9.178972],[-7.8338691,9.178093],[-7.8329171,9.178097],[-7.8310191,9.177826],[-7.8300811,9.177776],[-7.8288431,9.177423],[-7.8280111,9.177408],[-7.8271471,9.177067],[-7.8240281,9.176465],[-7.8233571,9.17602],[-7.8224891,9.175299],[-7.8217441,9.174847],[-7.8203621,9.173235],[-7.8212421,9.171475],[-7.8225191,9.169926],[-7.8234401,9.168895],[-7.8235621,9.166656],[-7.8232311,9.16423],[-7.8238401,9.162989],[-7.8239801,9.161325],[-7.8237981,9.159346],[-7.8237691,9.15855],[-7.8235931,9.157919],[-7.8231111,9.156685],[-7.8227401,9.15637],[-7.8226591,9.156239],[-7.8224591,9.155826],[-7.8223861,9.155508],[-7.8221291,9.155038],[-7.8213601,9.153919],[-7.8212201,9.153533],[-7.8209791,9.153213],[-7.8208161,9.1526],[-7.8208161,9.152082],[-7.8203251,9.151362],[-7.8198151,9.150912],[-7.8182941,9.149982],[-7.8172231,9.149252],[-7.8139741,9.147376],[-7.8131521,9.146484],[-7.8125541,9.146082],[-7.8119781,9.145845],[-7.8111371,9.145575],[-7.8102661,9.145103],[-7.8088931,9.144018],[-7.8084021,9.143875],[-7.8078181,9.143476],[-7.8074861,9.143323],[-7.8076151,9.142636],[-7.8076151,9.141994],[-7.8072441,9.141354],[-7.8066331,9.14115],[-7.8064781,9.140754],[-7.8065621,9.140122],[-7.8066871,9.139686],[-7.8069061,9.139317],[-7.8065811,9.138971],[-7.8068541,9.138686],[-7.8070921,9.138115],[-7.8073961,9.137546],[-7.8071941,9.136688],[-7.8072341,9.136287],[-7.8071771,9.135748],[-7.8069251,9.135308],[-7.8066401,9.134308],[-7.8067351,9.132952],[-7.8065921,9.132381],[-7.8056491,9.132563],[-7.8055331,9.131102],[-7.8052271,9.130883],[-7.8044981,9.130834],[-7.8039771,9.130716],[-7.8035961,9.130181],[-7.8031851,9.130194],[-7.8024371,9.130016],[-7.8019161,9.129568],[-7.8012391,9.129708],[-7.8007381,9.128669],[-7.7995541,9.128157],[-7.7983521,9.126685],[-7.7976781,9.126348],[-7.7972851,9.125867],[-7.7972271,9.124887],[-7.7967221,9.124224],[-7.7965301,9.123788],[-7.7957701,9.123667],[-7.7952911,9.123263],[-7.7946251,9.122412],[-7.7937061,9.121715],[-7.7929691,9.121534],[-7.7927911,9.120936],[-7.7928621,9.120388],[-7.7921721,9.120141],[-7.7918191,9.119752],[-7.7918391,9.119413],[-7.7916661,9.119069],[-7.7912881,9.118728],[-7.7908971,9.118505],[-7.7905401,9.118367],[-7.7901241,9.117999],[-7.7896161,9.117296],[-7.7891481,9.116411],[-7.7889841,9.115487],[-7.7883751,9.115148],[-7.7878951,9.114769],[-7.7874701,9.114651],[-7.7871711,9.11438],[-7.7868401,9.114342],[-7.7865631,9.114052],[-7.7861891,9.113173],[-7.7859811,9.112496],[-7.7855251,9.112053],[-7.7850671,9.111871],[-7.7852011,9.111346],[-7.7849941,9.110874],[-7.7847431,9.110579],[-7.7838381,9.110041],[-7.7839161,9.109538],[-7.7839161,9.109038],[-7.7833731,9.108837],[-7.7825441,9.108137],[-7.7826551,9.107587],[-7.7828011,9.107286],[-7.7823871,9.107203],[-7.7820861,9.106935],[-7.7822971,9.106207],[-7.7815661,9.106166],[-7.7807021,9.105787],[-7.7802871,9.104996],[-7.7790671,9.104705],[-7.7784191,9.104636],[-7.7779201,9.105255],[-7.7770991,9.105499],[-7.7764331,9.10529],[-7.7757521,9.105242],[-7.7750441,9.104774],[-7.7752541,9.103899],[-7.7750651,9.103217],[-7.7749891,9.102671],[-7.7747401,9.102396],[-7.7743171,9.102407],[-7.7739891,9.102019],[-7.7738381,9.101521],[-7.7739261,9.101343],[-7.7736071,9.101057],[-7.7735411,9.100924],[-7.7734941,9.100615],[-7.7732021,9.100649],[-7.7726151,9.100891],[-7.7722661,9.100718],[-7.7720531,9.100491],[-7.7715611,9.100561],[-7.7709291,9.100484],[-7.7706531,9.100282],[-7.7704811,9.100095],[-7.7704911,9.099976],[-7.7706141,9.099758],[-7.7706141,9.099568],[-7.7708291,9.099378],[-7.7707881,9.099209],[-7.7706101,9.099066],[-7.7704011,9.099107],[-7.7703761,9.099354],[-7.7701211,9.099703],[-7.7699671,9.099394],[-7.7697281,9.0992],[-7.7695611,9.099169],[-7.7694481,9.099211],[-7.7692131,9.09962],[-7.7687051,9.099385],[-7.7683151,9.099324],[-7.7681081,9.099395],[-7.7679041,9.099742],[-7.7675161,9.099848],[-7.7673411,9.099446],[-7.7669161,9.09923],[-7.7666621,9.098314],[-7.7668061,9.097548],[-7.7671641,9.096974],[-7.7669771,9.096794],[-7.7651111,9.095903],[-7.7643471,9.095418],[-7.7637141,9.095],[-7.7635771,9.094709],[-7.7633951,9.094544],[-7.7629651,9.094399],[-7.7622601,9.094473],[-7.7615541,9.094425],[-7.7612201,9.094532],[-7.7606701,9.094289],[-7.7604901,9.094292],[-7.7602461,9.094688],[-7.7599021,9.094592],[-7.7596481,9.094435],[-7.7589671,9.094408],[-7.7585591,9.09416],[-7.7580921,9.093975],[-7.7578371,9.094],[-7.7577891,9.094214],[-7.7575981,9.094558],[-7.7574341,9.094536],[-7.7571871,9.094252],[-7.7566881,9.094762],[-7.7546531,9.095083],[-7.7541701,9.095055],[-7.7544171,9.093922],[-7.7536431,9.09299],[-7.7533981,9.092873],[-7.7531011,9.092906],[-7.7527771,9.093034],[-7.7521741,9.092787],[-7.7519601,9.092549],[-7.7516261,9.092382],[-7.7509391,9.092542],[-7.7505241,9.092445],[-7.7503411,9.091692],[-7.7500061,9.091921],[-7.7494461,9.092001],[-7.7489231,9.091994],[-7.7484221,9.09093],[-7.7476241,9.090568],[-7.7467381,9.089683],[-7.7462731,9.088979],[-7.7452611,9.088453],[-7.7449371,9.088227],[-7.7448051,9.087982],[-7.7440771,9.087447],[-7.7441151,9.087095],[-7.7433491,9.086761],[-7.7425491,9.086286],[-7.7425281,9.0858],[-7.7421051,9.085925],[-7.7418611,9.085695],[-7.7411741,9.085631],[-7.7409671,9.085328],[-7.7405791,9.085204],[-7.7403691,9.085058],[-7.7402081,9.084812],[-7.7397211,9.084704],[-7.7395641,9.084329],[-7.7392791,9.084111],[-7.7387051,9.084501],[-7.7385021,9.084745],[-7.7379061,9.084413],[-7.7375121,9.084379],[-7.7373141,9.084099],[-7.7368881,9.083697],[-7.7364351,9.083421],[-7.7362171,9.082685],[-7.7358611,9.082441],[-7.7354631,9.082319],[-7.7351401,9.082302],[-7.7347821,9.082617],[-7.7343871,9.082881],[-7.7327421,9.081741],[-7.7323751,9.081795],[-7.7320001,9.082126],[-7.7311521,9.082017],[-7.7309371,9.081744],[-7.7305341,9.08177],[-7.7304411,9.081473],[-7.7301271,9.081269],[-7.7301991,9.08117],[-7.7305681,9.081084],[-7.7307241,9.080814],[-7.7306291,9.080618],[-7.7306031,9.080365],[-7.7305331,9.080214],[-7.7303411,9.080297],[-7.7301481,9.080465],[-7.7298981,9.080338],[-7.7297461,9.079834],[-7.7299611,9.079402],[-7.7298121,9.079139],[-7.7291361,9.078842],[-7.7289571,9.078584],[-7.7291291,9.078284],[-7.7294381,9.077959],[-7.7290791,9.077678],[-7.7289021,9.077434],[-7.7290691,9.076975],[-7.7287041,9.076727],[-7.7287551,9.07648],[-7.7285661,9.076038],[-7.7282071,9.075625],[-7.7274681,9.074628],[-7.7267671,9.073397],[-7.7265641,9.072818],[-7.7265664,9.072677],[-7.7272441,9.072249],[-7.7278201,9.071648],[-7.7281341,9.071202],[-7.7282391,9.070861],[-7.7286811,9.070516],[-7.7289881,9.070151],[-7.7295591,9.068956],[-7.7304161,9.067884],[-7.7303351,9.067646],[-7.7310561,9.066839],[-7.7317211,9.066374],[-7.7335201,9.065649],[-7.7335781,9.064959],[-7.7340301,9.064721],[-7.7347921,9.06453],[-7.7373341,9.064234],[-7.7379121,9.064508],[-7.7390061,9.064761],[-7.7407401,9.06434],[-7.7415731,9.064649],[-7.7423261,9.065147],[-7.7439291,9.06572],[-7.7453091,9.065839],[-7.7477401,9.065692],[-7.7488351,9.065817],[-7.7494981,9.065326],[-7.7500501,9.065239],[-7.7506521,9.065224],[-7.7508531,9.065276],[-7.7511021,9.065665],[-7.7512031,9.066023],[-7.7519481,9.066143],[-7.7530261,9.066664],[-7.7540341,9.067255],[-7.7545771,9.066638],[-7.7551791,9.066789],[-7.7568001,9.067406],[-7.7572581,9.06782],[-7.7579621,9.068075],[-7.7580661,9.068475],[-7.7578731,9.069011],[-7.7581051,9.069288],[-7.7594221,9.069498],[-7.7603971,9.069879],[-7.7613631,9.070024],[-7.7620111,9.070255],[-7.7624321,9.070765],[-7.7635381,9.070997],[-7.7644431,9.071307],[-7.7654261,9.072163],[-7.7661211,9.072406],[-7.7664961,9.072848],[-7.7679041,9.072976],[-7.7689511,9.07264],[-7.7704431,9.072934],[-7.7735991,9.073293],[-7.7741571,9.07366],[-7.7746471,9.073367],[-7.7755991,9.073778],[-7.7762481,9.073792],[-7.7773301,9.074448],[-7.7787731,9.074169],[-7.7799321,9.074435],[-7.7807091,9.074146],[-7.7816761,9.073687],[-7.7834071,9.073639],[-7.7854771,9.073305],[-7.7868811,9.073329],[-7.7878801,9.072901],[-7.7887151,9.073097],[-7.7902481,9.073705],[-7.7913131,9.074366],[-7.7925641,9.074688],[-7.7948761,9.074233],[-7.7957091,9.074519],[-7.7964221,9.074638],[-7.7968501,9.074329],[-7.7970171,9.073853],[-7.7972311,9.073615],[-7.7979211,9.07352],[-7.7984451,9.073353],[-7.7985451,9.072975],[-7.7988341,9.072689],[-7.7991501,9.072654],[-7.7995111,9.072531],[-7.8000691,9.072511],[-7.8010801,9.072729],[-7.8023511,9.073346],[-7.8031711,9.07348],[-7.8039941,9.07338],[-7.8044191,9.073528],[-7.8050981,9.073852],[-7.8058041,9.073929],[-7.8066271,9.073449],[-7.8072491,9.072592],[-7.8074681,9.072207],[-7.8080381,9.071645],[-7.8089381,9.070865],[-7.8090251,9.070331],[-7.8096191,9.070501],[-7.8098571,9.070298],[-7.8113421,9.070165],[-7.8121271,9.069641],[-7.8133401,9.069593],[-7.8150611,9.068732],[-7.8158141,9.068573],[-7.8162021,9.067957],[-7.8164531,9.067683],[-7.8165431,9.067148],[-7.8190041,9.065823],[-7.8208501,9.064402],[-7.8209861,9.064094],[-7.8212261,9.063798],[-7.8221471,9.063604],[-7.8240611,9.064467],[-7.8252071,9.064644],[-7.8259101,9.064867],[-7.8267641,9.064994],[-7.8278551,9.065409],[-7.8291241,9.065365],[-7.8309041,9.065914],[-7.8328631,9.067073],[-7.8367101,9.066416],[-7.8402621,9.066225],[-7.8414261,9.065429],[-7.8425231,9.063148],[-7.8429041,9.062218],[-7.8433191,9.061441],[-7.8446771,9.060933],[-7.8456821,9.060447],[-7.8475111,9.059247],[-7.8478861,9.058644],[-7.8486861,9.058022],[-7.8491441,9.056996],[-7.8492541,9.056278],[-7.8491851,9.055711],[-7.8488161,9.0549],[-7.8480601,9.054322],[-7.8479431,9.053854],[-7.8480861,9.052612],[-7.8485901,9.05079],[-7.8487651,9.050452],[-7.8489431,9.049949],[-7.8490551,9.04938],[-7.8494301,9.048937],[-7.8497301,9.048481],[-7.8499581,9.047922],[-7.8502131,9.047107],[-7.8501971,9.046949],[-7.8503531,9.046572],[-7.8501641,9.046275],[-7.8501341,9.045911],[-7.8495761,9.04502],[-7.8484021,9.044115],[-7.8485111,9.043533],[-7.8488351,9.042975],[-7.8491451,9.042912],[-7.8495281,9.042596],[-7.8496871,9.042316],[-7.8497501,9.042041],[-7.8497151,9.041856],[-7.8498391,9.041788],[-7.8499431,9.041494],[-7.8507721,9.041285],[-7.8511981,9.041106],[-7.8518291,9.040672],[-7.8524921,9.040012],[-7.8531841,9.03909],[-7.8541171,9.038939],[-7.8538811,9.037942],[-7.8540001,9.0373],[-7.8537081,9.036016],[-7.8537241,9.035615],[-7.8544031,9.035855],[-7.8547541,9.035696],[-7.8550631,9.035485],[-7.8553821,9.035496],[-7.8559231,9.034991],[-7.8561521,9.034038],[-7.8561721,9.033422],[-7.8567401,9.032525],[-7.8581281,9.032292],[-7.8617671,9.031501],[-7.8638461,9.030976],[-7.8653711,9.030177],[-7.8661821,9.030286],[-7.8687641,9.029756],[-7.8704341,9.030611],[-7.8732391,9.030102],[-7.8737801,9.0301],[-7.8753871,9.030432],[-7.8759011,9.030145],[-7.8767231,9.029778],[-7.8781831,9.030059],[-7.8797801,9.03118],[-7.8809321,9.031431],[-7.8818281,9.031421],[-7.8819111,9.031351],[-7.8837661,9.030742],[-7.8869751,9.029113],[-7.8885361,9.02824],[-7.8916221,9.028013],[-7.8943321,9.027383],[-7.8969921,9.026426],[-7.8986781,9.025193],[-7.8994031,9.018622],[-7.8987511,9.012029],[-7.9015521,9.01073],[-7.9064391,9.008212],[-7.9078511,9.007202],[-7.9125041,9.002985],[-7.9196271,9.000037],[-7.9271191,8.995655],[-7.9286581,8.993423],[-7.9297781,8.989399],[-7.9310651,8.989409],[-7.9340011,8.987946],[-7.9344491,8.983832],[-7.9344781,8.982553],[-7.9347171,8.981848],[-7.9345161,8.980992],[-7.9337681,8.979736],[-7.9324751,8.977707],[-7.9316611,8.977577],[-7.9301391,8.975305],[-7.9294981,8.973236],[-7.9287071,8.969795],[-7.9281541,8.968265],[-7.9272201,8.967728],[-7.9271061,8.967487],[-7.9270081,8.966435],[-7.9270221,8.965806],[-7.9272091,8.964308],[-7.9281191,8.962194],[-7.9294831,8.960054],[-7.9299651,8.958181],[-7.9299151,8.957371],[-7.9292791,8.956838],[-7.9295631,8.955846],[-7.9294871,8.955277],[-7.9290561,8.953911],[-7.9277541,8.951518],[-7.9270711,8.950574],[-7.9267041,8.949741],[-7.9267081,8.948655],[-7.9262021,8.947119],[-7.9259441,8.945577],[-7.9261081,8.944522],[-7.9250611,8.943499],[-7.9238581,8.943034],[-7.9237191,8.94262],[-7.9235181,8.94224],[-7.9233951,8.941215],[-7.9220991,8.940494],[-7.9221571,8.940038],[-7.9218591,8.939875],[-7.9203001,8.938661],[-7.9186211,8.936601],[-7.9175381,8.936899],[-7.9164431,8.936633],[-7.9166981,8.935632],[-7.9185591,8.93215],[-7.9191391,8.930978],[-7.9200741,8.929861],[-7.9210421,8.928335],[-7.9219271,8.927207],[-7.9238091,8.925904],[-7.9259931,8.924725],[-7.9313821,8.915431],[-7.9324981,8.913572],[-7.9336701,8.912644],[-7.9338701,8.912067],[-7.9344281,8.911237],[-7.9365131,8.907627],[-7.9390131,8.904615],[-7.9397371,8.902507],[-7.9403891,8.901964],[-7.9423661,8.900458],[-7.9425761,8.899587],[-7.9427781,8.898127],[-7.9426241,8.89732],[-7.9426731,8.896213],[-7.9432131,8.894452],[-7.9435051,8.893147],[-7.9430991,8.892343],[-7.9428121,8.891412],[-7.9422081,8.890502],[-7.9411961,8.890153],[-7.9379201,8.889988],[-7.9343841,8.888504],[-7.9284271,8.887452],[-7.9268061,8.886265],[-7.9250871,8.884126],[-7.9253091,8.883793],[-7.9265881,8.882485],[-7.9269561,8.881752],[-7.9287371,8.881338],[-7.9292501,8.879302],[-7.9303461,8.87876],[-7.9321191,8.87731],[-7.9331171,8.876018],[-7.9376391,8.849049],[-7.9378821,8.849035],[-7.9388971,8.849458],[-7.9398321,8.849538],[-7.9407551,8.849335],[-7.9419601,8.849369],[-7.9426221,8.849463],[-7.9448091,8.849092],[-7.9454171,8.84918],[-7.9473501,8.849627],[-7.9482791,8.849711],[-7.9493201,8.849513],[-7.9498751,8.849511],[-7.9516591,8.849106],[-7.9525871,8.848583],[-7.9535081,8.847265],[-7.9539881,8.847086],[-7.9546001,8.846643],[-7.9547591,8.846324],[-7.9552951,8.845816],[-7.9557001,8.845308],[-7.9558471,8.844918],[-7.9556391,8.843927],[-7.9551351,8.842845],[-7.9549791,8.842374],[-7.9550711,8.841976],[-7.9561481,8.841723],[-7.9570621,8.841788],[-7.9599571,8.841475],[-7.9606761,8.841829],[-7.9615821,8.842087],[-7.9621531,8.842063],[-7.9633581,8.842101],[-7.9647801,8.841884],[-7.9659391,8.841563],[-7.9660791,8.841492],[-7.9663411,8.841206],[-7.9671261,8.840968],[-7.9674511,8.840734],[-7.9685191,8.840261],[-7.9689341,8.840034],[-7.9701481,8.838565],[-7.9707901,8.838018],[-7.9715521,8.837137],[-7.9719091,8.836399],[-7.9720751,8.835733],[-7.9723881,8.835031],[-7.9729801,8.83421],[-7.9732411,8.833187],[-7.9735501,8.832545],[-7.9740261,8.83195],[-7.9741451,8.831427],[-7.9745501,8.831022],[-7.9747401,8.830403],[-7.9747081,8.829746],[-7.9743751,8.829389],[-7.9738751,8.828699],[-7.9730421,8.828318],[-7.9721381,8.828389],[-7.9714721,8.827914],[-7.9714001,8.827509],[-7.9715911,8.826105],[-7.9713531,8.825582],[-7.9706871,8.825391],[-7.9694731,8.825534],[-7.9687351,8.825891],[-7.9673311,8.82582],[-7.9667601,8.825249],[-7.9666431,8.824453],[-7.9665301,8.824107],[-7.9662311,8.823602],[-7.9656851,8.822936],[-7.9653091,8.821656],[-7.9648431,8.82138],[-7.9645731,8.820761],[-7.9642081,8.819393],[-7.9632671,8.818713],[-7.9623901,8.817287],[-7.9616491,8.816207],[-7.9614311,8.815802],[-7.9612821,8.815357],[-7.9610021,8.814922],[-7.9605261,8.814589],[-7.9596691,8.814636],[-7.9587421,8.814446],[-7.9573741,8.813848],[-7.9563971,8.812582],[-7.9550291,8.812038],[-7.9542211,8.811472],[-7.9535701,8.81072],[-7.9530821,8.809865],[-7.9518931,8.809368],[-7.9511271,8.808997],[-7.9512221,8.808188],[-7.9514131,8.807545],[-7.9512461,8.806689],[-7.9507941,8.806094],[-7.9501521,8.805547],[-7.9498191,8.804595],[-7.9493851,8.803718],[-7.9489921,8.802676],[-7.9494531,8.801567],[-7.9493881,8.800163],[-7.9492831,8.799549],[-7.9488691,8.799186],[-7.9485141,8.798927],[-7.9482301,8.798779],[-7.9487141,8.797876],[-7.9489821,8.795742],[-7.9491511,8.794873],[-7.9496031,8.794139],[-7.9503221,8.793824],[-7.9497571,8.7923],[-7.9494781,8.791719],[-7.9490241,8.790978],[-7.9495691,8.790247],[-7.9490401,8.789391],[-7.9487471,8.789114],[-7.9486141,8.788675],[-7.9478441,8.788235],[-7.9464001,8.788098],[-7.9458571,8.787561],[-7.9448281,8.786845],[-7.9448521,8.786392],[-7.9448041,8.785917],[-7.9443761,8.785702],[-7.9437101,8.785512],[-7.9430671,8.785417],[-7.9418301,8.785774],[-7.9413541,8.785679],[-7.9407121,8.78575],[-7.9401171,8.786202],[-7.9397831,8.786678],[-7.9392361,8.786726],[-7.9386421,8.786131],[-7.9386181,8.785226],[-7.9376901,8.784227],[-7.9364851,8.782048],[-7.9354321,8.780682],[-7.9352631,8.780943],[-7.9338741,8.779868],[-7.9328961,8.778439],[-7.9328591,8.777636],[-7.9320932,8.776952],[-7.9316041,8.7765152],[-7.9306981,8.7764237],[-7.9303072,8.7767023],[-7.9299142,8.7770665],[-7.9292276,8.7773762],[-7.9279249,8.7771082],[-7.9279331,8.777532],[-7.9274316,8.7774479],[-7.9271889,8.7774071],[-7.9254689,8.7752828],[-7.9250234,8.7755982],[-7.9244521,8.7753809],[-7.9239051,8.7756313],[-7.9236905,8.7751846],[-7.9231731,8.774996],[-7.9224387,8.7753781],[-7.9213792,8.7752569],[-7.9209852,8.7750813],[-7.9202925,8.7742813],[-7.919799,8.7742658],[-7.9192658,8.774547],[-7.9184295,8.7751813],[-7.9180575,8.7751796],[-7.9178456,8.7747878],[-7.9178296,8.7743253],[-7.9174858,8.7741729],[-7.9170253,8.77427],[-7.9172394,8.7747863],[-7.9169877,8.7751714],[-7.9151765,8.7749607],[-7.9140301,8.77483],[-7.9126551,8.774835],[-7.9120001,8.774753],[-7.9110371,8.774523],[-7.9098221,8.775058],[-7.9085581,8.77515],[-7.9076261,8.775636],[-7.9075281,8.776383],[-7.9072471,8.776865],[-7.9060091,8.77682],[-7.9052571,8.777814],[-7.9044611,8.778267],[-7.9034387,8.7782441],[-7.9022191,8.7774377],[-7.9008661,8.7776905],[-7.9003611,8.7778888],[-7.8997452,8.7788812],[-7.8994761,8.779386],[-7.8988391,8.779881],[-7.8980401,8.780111],[-7.8975205,8.7803405],[-7.8974087,8.7814051],[-7.8969646,8.7822732],[-7.8969353,8.7834493],[-7.8970985,8.7837516],[-7.8969938,8.784077],[-7.8967319,8.7844173],[-7.8962039,8.7846129],[-7.8962545,8.7855277],[-7.8961655,8.7864202],[-7.8955425,8.7876788],[-7.8955585,8.7889835],[-7.8954492,8.7894969],[-7.8951238,8.7896486],[-7.8946414,8.7894667],[-7.8939865,8.7898791],[-7.8936538,8.7896113],[-7.8935652,8.7890949],[-7.8930735,8.7888289],[-7.8923089,8.7887678],[-7.8915927,8.7885322],[-7.8908351,8.7879169],[-7.8900858,8.787544],[-7.8895666,8.7876774],[-7.8892954,8.7884061],[-7.8888961,8.7884392],[-7.8883425,8.7883084],[-7.88784,8.7889969],[-7.8869404,8.7885621],[-7.8861772,8.7883631],[-7.8858491,8.7889894],[-7.8853718,8.7891351],[-7.8842532,8.7890839],[-7.8833117,8.7887449],[-7.8824913,8.7888072],[-7.8820377,8.7886925],[-7.8817673,8.7897059],[-7.8811516,8.7898914],[-7.8806151,8.7897339],[-7.8803507,8.7902583],[-7.8801418,8.7902718],[-7.8799307,8.7900425],[-7.879711,8.7900829],[-7.8794111,8.790612],[-7.8788131,8.790718],[-7.8783482,8.7906296],[-7.8781547,8.7903923],[-7.8777451,8.790424],[-7.8775131,8.791297],[-7.8772951,8.791417],[-7.8760361,8.790998],[-7.8758601,8.790562],[-7.8754291,8.790107],[-7.8750496,8.7896421],[-7.8743901,8.789244],[-7.8737095,8.789084],[-7.8729759,8.7895157],[-7.8716156,8.7898708],[-7.8710861,8.789789],[-7.8700539,8.7891893],[-7.8694341,8.789041],[-7.8692453,8.7889393],[-7.8689941,8.788153],[-7.8688003,8.7874481],[-7.8688996,8.7866458],[-7.8687421,8.7860675],[-7.8683237,8.7852038],[-7.8680562,8.7838366],[-7.8667464,8.7834729],[-7.8656495,8.7831092],[-7.8650956,8.7828499],[-7.8646422,8.7820347],[-7.8635909,8.7816405],[-7.8634015,8.7813322],[-7.862409,8.7808015],[-7.8614677,8.780431],[-7.8613937,8.7800594],[-7.8622307,8.7792917],[-7.8633617,8.7799297],[-7.8640355,8.7798224],[-7.8645814,8.779525],[-7.8645301,8.779118],[-7.8640525,8.7783665],[-7.8636264,8.7771722],[-7.8635485,8.7762814],[-7.8637901,8.7758279],[-7.8634388,8.7748475],[-7.8632396,8.7745728],[-7.8622289,8.7745189],[-7.8613105,8.7743212],[-7.8610508,8.7741023],[-7.8598793,8.773736],[-7.8585739,8.7738715],[-7.8583308,8.7744604],[-7.8580171,8.7746275],[-7.8563384,8.7747693],[-7.8556204,8.7743833],[-7.8544037,8.7741969],[-7.853121,8.7746195],[-7.8529376,8.7751173],[-7.851575,8.7758716],[-7.8510601,8.7765439],[-7.8508011,8.77655],[-7.8502336,8.7767881],[-7.8499221,8.77706],[-7.8493829,8.7773681],[-7.8484482,8.7771363],[-7.8480736,8.7769368],[-7.8480061,8.776611],[-7.8480641,8.775952],[-7.8479551,8.775619],[-7.8473868,8.7752362],[-7.8466494,8.7746399],[-7.8461925,8.7743385],[-7.8456496,8.774042],[-7.845464,8.7737044],[-7.8450418,8.7734296],[-7.8444612,8.7732096],[-7.8442902,8.7733861],[-7.8443841,8.7740288],[-7.8440147,8.7740829],[-7.8435091,8.774347],[-7.8429874,8.7746577],[-7.8424506,8.774771],[-7.842182,8.7744937],[-7.8421268,8.774061],[-7.8417777,8.7731591],[-7.8413689,8.7729533],[-7.8410522,8.7730793],[-7.8408223,8.773093],[-7.8392148,8.7723281],[-7.8388225,8.7722828],[-7.8375517,8.7723803],[-7.8359673,8.7720829],[-7.8355193,8.7720614],[-7.8351193,8.771922],[-7.8342155,8.770886],[-7.8339355,8.7698162],[-7.833755,8.7694835],[-7.8329276,8.7692604],[-7.8323629,8.769507],[-7.8315549,8.768794],[-7.8307331,8.768576],[-7.8306394,8.7679813],[-7.8308161,8.767568],[-7.8306381,8.766762],[-7.8306742,8.7663141],[-7.8312772,8.7654585],[-7.8316136,8.7638713],[-7.8318824,8.7630765],[-7.8324297,8.7625425],[-7.8331411,8.761417],[-7.833015,8.7596343],[-7.8328184,8.7593827],[-7.8321948,8.7598314],[-7.8314746,8.7599267],[-7.8315261,8.759033],[-7.8313268,8.7580834],[-7.8313199,8.7576306],[-7.8311751,8.7574784],[-7.8308574,8.7574725],[-7.8305661,8.758077],[-7.8299781,8.758579],[-7.8296341,8.7592351],[-7.8289844,8.7595766],[-7.8283146,8.7593967],[-7.8276049,8.7594508],[-7.8262406,8.7593061],[-7.8256936,8.7593674],[-7.825347,8.7595354],[-7.8250984,8.7597629],[-7.8248555,8.7603281],[-7.8246424,8.7605505],[-7.8242563,8.7605089],[-7.823896,8.7599363],[-7.8232459,8.7596505],[-7.8227411,8.7595298],[-7.821989,8.7595924],[-7.8217085,8.7597101],[-7.820683,8.7614105],[-7.8201465,8.7621336],[-7.8190207,8.7630468],[-7.8179611,8.7637151],[-7.8176357,8.7640637],[-7.8174236,8.7651118],[-7.8169899,8.7661236],[-7.8163677,8.7664728],[-7.8157902,8.7663887],[-7.8147435,8.7663523],[-7.8139394,8.7665241],[-7.812969,8.7663282],[-7.8124244,8.7660985],[-7.8122326,8.7661243],[-7.812153,8.7663094],[-7.8122565,8.7666098],[-7.8116008,8.7672363],[-7.8109961,8.767451],[-7.8107998,8.7676097],[-7.810079,8.7677875],[-7.8095506,8.7681276],[-7.8087868,8.7684985],[-7.8084966,8.7684103],[-7.8084364,8.7680708],[-7.8075299,8.7675632],[-7.8060506,8.767066],[-7.8052593,8.7670973],[-7.8041075,8.7667854],[-7.8035018,8.7663843],[-7.8033518,8.7663377],[-7.8032033,8.7664219],[-7.803176,8.7666237],[-7.8033681,8.7668727],[-7.8033231,8.7671075],[-7.8031958,8.7671624],[-7.8029326,8.7671438],[-7.8026671,8.7668555],[-7.8018574,8.7668256],[-7.8009182,8.7664646],[-7.8006114,8.7664596],[-7.8004242,8.7665495],[-7.7998296,8.7671054],[-7.7994532,8.7670764],[-7.7991681,8.7666846],[-7.799032,8.7665147],[-7.7986169,8.766542],[-7.7985088,8.7669742],[-7.7981347,8.7672035],[-7.7975814,8.7672894],[-7.7973031,8.7672032],[-7.7971358,8.7670332],[-7.7970611,8.7665617],[-7.795793,8.7664234],[-7.7955868,8.7664625],[-7.7951629,8.7663534],[-7.7946664,8.7660665],[-7.7939262,8.7657421],[-7.793155,8.7653013],[-7.7927948,8.76536],[-7.7902951,8.7660728],[-7.789658,8.7663884],[-7.7889117,8.7669998],[-7.7885813,8.7671858],[-7.7882315,8.7675261],[-7.7875455,8.7675286],[-7.7876401,8.766111],[-7.7877221,8.76487],[-7.7872921,8.762876],[-7.7866561,8.759415],[-7.7888595,8.7486459],[-7.7897801,8.744146],[-7.7904231,8.743093],[-7.7913011,8.741906],[-7.7764271,8.731537],[-7.7614741,8.730895],[-7.7597901,8.727831],[-7.7529011,8.715606],[-7.7519061,8.71384],[-7.7519501,8.712916],[-7.7544901,8.699449],[-7.7550001,8.69573],[-7.7334201,8.659901],[-7.7326881,8.658844],[-7.6920551,8.64935],[-7.6917951,8.648972],[-7.6889831,8.64713],[-7.6716421,8.618032],[-7.6726721,8.615159],[-7.6780681,8.603416],[-7.6773611,8.598785],[-7.6806371,8.587665],[-7.6814211,8.586678],[-7.6849671,8.583956],[-7.6863391,8.583399],[-7.6872401,8.582456],[-7.6878401,8.58104],[-7.6890841,8.579325],[-7.6921141,8.576802],[-7.6930791,8.575186],[-7.6948431,8.571544],[-7.6963011,8.567776],[-7.6966881,8.56632],[-7.6967041,8.562772],[-7.6963741,8.559728],[-7.6955951,8.556842],[-7.6591791,8.49871],[-7.6589281,8.496617],[-7.6599281,8.495247],[-7.6608091,8.494673],[-7.6612991,8.493727],[-7.6619941,8.491579],[-7.6619921,8.490788],[-7.6621911,8.48947],[-7.6625511,8.488842],[-7.6629981,8.488299],[-7.6637121,8.485944],[-7.6646951,8.484724],[-7.6640211,8.484064],[-7.6638261,8.482888],[-7.6638081,8.481257],[-7.6630521,8.47876],[-7.6631461,8.477979],[-7.6628351,8.477496],[-7.6627071,8.477085],[-7.6634581,8.476454],[-7.6642591,8.475974],[-7.6642921,8.475621],[-7.6640451,8.475236],[-7.6638931,8.475181],[-7.6637511,8.474635],[-7.6638061,8.474109],[-7.6642111,8.473332],[-7.6640691,8.472761],[-7.6639151,8.472554],[-7.6645001,8.472278],[-7.6646621,8.471829],[-7.6651911,8.470893],[-7.6656911,8.470586],[-7.6657421,8.470438],[-7.6661041,8.47049],[-7.6666231,8.470402],[-7.6670581,8.47041],[-7.6674741,8.469881],[-7.6679371,8.469647],[-7.6682611,8.469612],[-7.6686051,8.469792],[-7.6687031,8.470337],[-7.6692771,8.470148],[-7.6699471,8.47011],[-7.6705221,8.470025],[-7.6711481,8.469793],[-7.6713571,8.469501],[-7.6717151,8.468074],[-7.6722121,8.467811],[-7.6732781,8.467683],[-7.6738761,8.46703],[-7.6744041,8.466289],[-7.6744591,8.465821],[-7.6734281,8.464671],[-7.6731341,8.463993],[-7.6728231,8.461744],[-7.6726431,8.460912],[-7.6727811,8.460219],[-7.6727521,8.460028],[-7.6728001,8.458942],[-7.6729801,8.458259],[-7.6730151,8.457713],[-7.6731161,8.457275],[-7.6732141,8.456224],[-7.6727531,8.455326],[-7.6717501,8.454127],[-7.6715481,8.453036],[-7.6707451,8.451457],[-7.6707131,8.451044],[-7.6705861,8.450377],[-7.6710221,8.449234],[-7.6715868,8.4487919],[-7.6715323,8.4477909],[-7.6716301,8.446931],[-7.6721511,8.446225],[-7.6723491,8.445715],[-7.6725291,8.44538],[-7.6725951,8.445116],[-7.6730331,8.444534],[-7.6734041,8.443613],[-7.6738081,8.443198],[-7.6745261,8.442758],[-7.6749841,8.442599],[-7.6752131,8.442377],[-7.6754431,8.442251],[-7.6757211,8.442006],[-7.6759181,8.441513],[-7.6764841,8.441609],[-7.6766741,8.441493],[-7.6771707,8.4413608],[-7.6780944,8.4412612],[-7.6767961,8.439523],[-7.6766041,8.438992],[-7.6765601,8.438195],[-7.6764331,8.437279],[-7.6756911,8.436764],[-7.6756061,8.436133],[-7.6753391,8.435532],[-7.6753311,8.435071],[-7.6757871,8.434202],[-7.6754511,8.433881],[-7.6751591,8.433024],[-7.6754411,8.431735],[-7.6749761,8.43112],[-7.6746251,8.430751],[-7.6743301,8.429918],[-7.6736161,8.428345],[-7.6735321,8.427536],[-7.6736781,8.427202],[-7.6734971,8.426515],[-7.6728161,8.425602],[-7.6722681,8.425217],[-7.6716011,8.424931],[-7.6709331,8.424887],[-7.6705801,8.424774],[-7.6702731,8.424456],[-7.6693761,8.423984],[-7.6689091,8.423876],[-7.6688491,8.423654],[-7.6690591,8.423183],[-7.6694461,8.42322],[-7.6701301,8.422352],[-7.6690431,8.42084],[-7.6685801,8.420099],[-7.6683541,8.419357],[-7.6678881,8.418743],[-7.6675481,8.419044],[-7.6670181,8.418914],[-7.6664531,8.417664],[-7.6666601,8.417441],[-7.6660821,8.417159],[-7.6651711,8.41633],[-7.6653851,8.41537],[-7.6652671,8.414648],[-7.6649401,8.414241],[-7.6643171,8.413884],[-7.6640031,8.413404],[-7.6638171,8.412726],[-7.6632191,8.411621],[-7.6629781,8.410219],[-7.6627181,8.409335],[-7.6619501,8.407978],[-7.6612591,8.407541],[-7.6601261,8.407681],[-7.6598861,8.408241],[-7.6589661,8.40847],[-7.6583871,8.408717],[-7.6570781,8.408979],[-7.6557781,8.409337],[-7.6553381,8.409217],[-7.6549101,8.408981],[-7.6547701,8.40836],[-7.6552301,8.407771],[-7.6551871,8.406983],[-7.6552854,8.406297],[-7.6553671,8.405728],[-7.6550711,8.404725],[-7.6548101,8.404148],[-7.6540741,8.403761],[-7.6532861,8.403953],[-7.6526091,8.4031],[-7.6521381,8.403177],[-7.6517001,8.402711],[-7.6509821,8.402693],[-7.6500911,8.401766],[-7.6497991,8.401648],[-7.6493541,8.400875],[-7.6498671,8.400245],[-7.6495591,8.399199],[-7.6490121,8.398676],[-7.6492971,8.398217],[-7.6492001,8.397821],[-7.6493691,8.397245],[-7.6496611,8.396669],[-7.6491571,8.39576],[-7.6493521,8.394704],[-7.6487451,8.393552],[-7.6489011,8.392936],[-7.6482881,8.391317],[-7.6484401,8.390595],[-7.6479401,8.389782],[-7.6479051,8.38925],[-7.6482192,8.3884951],[-7.6479011,8.3873222],[-7.6476122,8.3870642],[-7.6469809,8.3867785],[-7.6467458,8.3864662],[-7.646907,8.3857353],[-7.6468197,8.3853101],[-7.6464771,8.3850642],[-7.6463697,8.3843998],[-7.6460137,8.384134],[-7.6456107,8.3841606],[-7.645107,8.3844662],[-7.6447578,8.3842403],[-7.644563,8.3838416],[-7.6438578,8.3832769],[-7.6434481,8.3824131],[-7.642978,8.3821074],[-7.642387,8.3820941],[-7.6419437,8.3817619],[-7.6414131,8.3810377],[-7.6410974,8.3807054],[-7.6406072,8.3807387],[-7.6402512,8.3805061],[-7.6395661,8.3805526],[-7.6386997,8.3804862],[-7.6381994,8.3803201],[-7.6379436,8.3779922],[-7.6379223,8.3772324],[-7.6384094,8.3761094],[-7.6406984,8.3751698],[-7.6435224,8.3748105],[-7.6448749,8.3748628],[-7.6455667,8.3752722],[-7.648648,8.3776183],[-7.6500154,8.3778296],[-7.6509522,8.3775041],[-7.6519655,8.3764982],[-7.653402,8.3758728],[-7.6547495,8.3740389],[-7.6558192,8.3737438],[-7.6571622,8.3739658],[-7.6583076,8.3736409],[-7.6592051,8.3738557],[-7.6610031,8.3778821],[-7.6650945,8.3825099],[-7.6661443,8.3825157],[-7.667514,8.3820375],[-7.6704654,8.3816529],[-7.6719973,8.3779226],[-7.6771314,8.3761363],[-7.678567,8.3759942],[-7.6814422,8.3752758],[-7.6822541,8.3755969],[-7.682885,8.3765022],[-7.6831358,8.377206],[-7.6855545,8.3796062],[-7.6867064,8.3797509],[-7.6876251,8.379608],[-7.6891695,8.3785129],[-7.6905537,8.3778031],[-7.6910988,8.3766063],[-7.6936332,8.3765623],[-7.6952346,8.3758572],[-7.6963059,8.3756765],[-7.6974769,8.3747968],[-7.6993745,8.375848],[-7.7015574,8.3766813],[-7.7029155,8.3777696],[-7.704775,8.3780722],[-7.7048491,8.3780843],[-7.7067248,8.3787462],[-7.7085054,8.3795321],[-7.7102551,8.3795553],[-7.7134079,8.3800086],[-7.7144943,8.3802884],[-7.716147,8.3803919],[-7.7170256,8.3817194],[-7.7186236,8.3810878],[-7.7199918,8.3799669],[-7.7223467,8.380477],[-7.7232453,8.381025],[-7.7237652,8.3818476],[-7.7243813,8.3819046],[-7.7252559,8.3813811],[-7.7259754,8.3803082],[-7.7285429,8.3806777],[-7.7292941,8.3804479],[-7.729755,8.3801556],[-7.734866,8.3798534],[-7.735969,8.3785815],[-7.7370008,8.3785704],[-7.738498,8.3782698],[-7.739817,8.3783921],[-7.7401376,8.3777841],[-7.740498,8.3775311],[-7.7419182,8.3783815],[-7.74276,8.3795803],[-7.7430717,8.3805459],[-7.7442584,8.3818441],[-7.7459104,8.3828924],[-7.7466755,8.3842247],[-7.7478169,8.3854378],[-7.7482929,8.3864488],[-7.7491094,8.3888432],[-7.7496338,8.3908416],[-7.7500367,8.3922159],[-7.7526514,8.3937353],[-7.7535383,8.3945732],[-7.7543428,8.3958409],[-7.7560105,8.3975515],[-7.756358,8.3983011],[-7.75653,8.3993357],[-7.7565493,8.4012068],[-7.7573566,8.4040114],[-7.7572428,8.404865],[-7.756616,8.4061862],[-7.7555663,8.408001],[-7.755703,8.4090245],[-7.7560602,8.4097798],[-7.7570685,8.4112866],[-7.7581313,8.4133327],[-7.7583977,8.4145074],[-7.7590479,8.4163239],[-7.759902,8.4177947],[-7.7609779,8.4185393],[-7.7628088,8.41896],[-7.7633245,8.4198285],[-7.7639516,8.4205659],[-7.764492,8.4223747],[-7.7644324,8.4230774],[-7.7632323,8.4252829],[-7.7632734,8.426056],[-7.7644727,8.4284467],[-7.7650405,8.4302543],[-7.7665589,8.4315934],[-7.7674311,8.4319241],[-7.7684312,8.4328804],[-7.7688128,8.4335272],[-7.7688609,8.4341952],[-7.768474,8.4352431],[-7.7680894,8.4359252],[-7.7681079,8.4363557],[-7.7685103,8.4373671],[-7.7691174,8.4379],[-7.7698076,8.43821],[-7.7712513,8.439686],[-7.771992,8.4408555],[-7.772111,8.4420395],[-7.7724335,8.4426279],[-7.7736072,8.4433728],[-7.7740811,8.444291],[-7.7757877,8.448885],[-7.7762354,8.4492313],[-7.7771859,8.4497698],[-7.777722,8.4501853],[-7.7779214,8.4509927],[-7.7783144,8.4543365],[-7.7782984,8.4550468],[-7.778025,8.4562436],[-7.7786034,8.4572249],[-7.779513,8.4594574],[-7.7793173,8.4615745],[-7.7799047,8.4627324],[-7.7804141,8.4631504],[-7.7804578,8.4644297],[-7.7810943,8.4653981],[-7.7822482,8.4660163],[-7.7832063,8.4668952],[-7.7834058,8.4678615],[-7.7843835,8.4699935],[-7.7856829,8.4731279],[-7.7863964,8.4749716],[-7.7878997,8.4766296],[-7.7892495,8.4768882],[-7.7905679,8.4766128],[-7.7919034,8.4757811],[-7.7928468,8.4758264],[-7.7943584,8.4765409],[-7.7954719,8.4775989],[-7.796885,8.4798611],[-7.7976829,8.4816679],[-7.7980744,8.4857062],[-7.7990237,8.486666],[-7.801378,8.4877817],[-7.802597,8.4874977],[-7.807138,8.4844585],[-7.8100699,8.4841124],[-7.812252,8.4841525],[-7.8138075,8.4853315],[-7.8137283,8.4886625],[-7.8144551,8.4902251],[-7.8174715,8.4932688],[-7.8185256,8.4941016],[-7.8204993,8.4947042],[-7.8218134,8.4946474],[-7.8238014,8.4950635],[-7.8244339,8.4950666],[-7.8259545,8.4956234],[-7.826517,8.495363],[-7.8269179,8.4948162],[-7.8276663,8.4906607],[-7.8281785,8.489147],[-7.8276006,8.4876048],[-7.8276251,8.4871707],[-7.828776,8.4860234],[-7.8299021,8.4843375],[-7.8297976,8.4836007],[-7.8290001,8.4825946],[-7.8281229,8.4821002],[-7.8271853,8.4811604],[-7.827216,8.4799418],[-7.8281683,8.4776271],[-7.8286102,8.4755965],[-7.8295661,8.475295],[-7.8307613,8.4753224],[-7.8324072,8.4748773],[-7.8335713,8.4746842],[-7.8353018,8.4734194],[-7.8352902,8.4726676],[-7.8348815,8.4715787],[-7.8341391,8.4706146],[-7.8320265,8.468273],[-7.8315417,8.4673897],[-7.8310569,8.4652629],[-7.8303609,8.4625149],[-7.8292169,8.461193],[-7.8283456,8.4596519],[-7.827643,8.4592848],[-7.8267323,8.4592926],[-7.8260872,8.4597466],[-7.8255813,8.4596091],[-7.8254391,8.4593173],[-7.8256661,8.4582951],[-7.8264624,8.457016],[-7.827929,8.4553917],[-7.8280525,8.4546243],[-7.827777,8.4524271],[-7.8277778,8.4515229],[-7.8279197,8.4505401],[-7.8285585,8.448634],[-7.8286121,8.4480168],[-7.828255,8.447321],[-7.8276548,8.4467794],[-7.8271288,8.4465012],[-7.8263539,8.4463472],[-7.8250412,8.4465398],[-7.8235788,8.4472809],[-7.8229176,8.4471914],[-7.8223358,8.4468231],[-7.8229589,8.4431968],[-7.8256187,8.441967],[-7.8273795,8.4406011],[-7.8283827,8.4399705],[-7.8285172,8.438853],[-7.8292109,8.4377255],[-7.8301349,8.4370746],[-7.8307282,8.4361357],[-7.8319029,8.434982],[-7.8338498,8.4336851],[-7.8350408,8.4322944],[-7.8356192,8.4301841],[-7.8374814,8.4281883],[-7.8379906,8.42657],[-7.8400875,8.427115],[-7.8408955,8.4282741],[-7.8418678,8.4282482],[-7.8439934,8.4265161],[-7.8460316,8.42686],[-7.8470168,8.427613],[-7.8488383,8.4279671],[-7.8497545,8.4290523],[-7.8498738,8.4304761],[-7.8505615,8.4306241],[-7.8526175,8.4299977],[-7.8544004,8.4279657],[-7.8555184,8.4271627],[-7.8560791,8.4260678],[-7.856501,8.4256728],[-7.8574977,8.4256612],[-7.8587041,8.4264596],[-7.8605269,8.4265862],[-7.864957,8.4242112],[-7.8712457,8.4250956],[-7.872392,8.4254312],[-7.8737587,8.4261616],[-7.8742277,8.4270926],[-7.8752411,8.4275869],[-7.8759986,8.4276431],[-7.8767346,8.4272033],[-7.877257,8.4262386],[-7.8775093,8.4247774],[-7.8777745,8.4222525],[-7.8783319,8.4212765],[-7.8800392,8.4206166],[-7.8809604,8.4206113],[-7.8814789,8.4212007],[-7.8818141,8.4243872],[-7.8815543,8.4253725],[-7.8808317,8.4256538],[-7.8801575,8.4255532],[-7.8797938,8.4260542],[-7.8799124,8.42697],[-7.8802146,8.4276738],[-7.8809569,8.4286811],[-7.8810257,8.4298826],[-7.8803829,8.4319969],[-7.8797443,8.4335311],[-7.8798165,8.4348042],[-7.8816004,8.4386618],[-7.8817246,8.4398837],[-7.8813995,8.4406011],[-7.8803778,8.4409502],[-7.8795485,8.4408749],[-7.8791455,8.4411201],[-7.8790724,8.4416104],[-7.8793355,8.4419501],[-7.879964,8.4421406],[-7.8807096,8.4420492],[-7.8813737,8.4416144],[-7.8837686,8.4392535],[-7.8847826,8.437815],[-7.8857501,8.4369601],[-7.8874788,8.4358819],[-7.8903242,8.4365185],[-7.8926836,8.4377875],[-7.8953256,8.4397226],[-7.8960474,8.4404003],[-7.8971372,8.4417848],[-7.8988835,8.4425789],[-7.8998206,8.4410266],[-7.9049704,8.4394984],[-7.9073737,8.4405172],[-7.9064244,8.4446347],[-7.9063449,8.4460202],[-7.9059852,8.4477748],[-7.9060604,8.4501365],[-7.9059763,8.450795],[-7.9044687,8.4535363],[-7.9045041,8.4539369],[-7.9053317,8.4545504],[-7.9055626,8.4551302],[-7.9062646,8.4557123],[-7.9072934,8.4557297],[-7.9093864,8.4548012],[-7.9115224,8.4544792],[-7.9135643,8.453433],[-7.914821,8.4530185],[-7.9154209,8.4529063],[-7.916857,8.4531761],[-7.9187696,8.453401],[-7.9199532,8.4528252],[-7.9203721,8.4523605],[-7.9211126,8.4527202],[-7.921671,8.4531701],[-7.9218479,8.4535513],[-7.9216297,8.4540361],[-7.9198478,8.4549679],[-7.9194042,8.4556331],[-7.9193752,8.45651],[-7.9196023,8.4575092],[-7.9195114,8.4590751],[-7.9188537,8.4609903],[-7.9182339,8.4623799],[-7.9181642,8.463184],[-7.9183106,8.4638728],[-7.9180141,8.4645972],[-7.9162567,8.4660563],[-7.9154867,8.4656316],[-7.9149342,8.4654076],[-7.9131166,8.4666851],[-7.9129892,8.4674259],[-7.9135092,8.4689413],[-7.9133488,8.4698992],[-7.9134243,8.4707478],[-7.9130835,8.4712799],[-7.9122935,8.4715459],[-7.9113154,8.4714145],[-7.910802,8.4708081],[-7.9099865,8.4682339],[-7.9099,8.4668492],[-7.9108608,8.464526],[-7.9106781,8.4632642],[-7.910373,8.4624417],[-7.9098988,8.462092],[-7.9090962,8.4618828],[-7.9074026,8.4618104],[-7.9066733,8.4621874],[-7.9065697,8.4627051],[-7.9066941,8.4632222],[-7.9070957,8.4638681],[-7.9076017,8.4648948],[-7.9076614,8.4657203],[-7.9074666,8.4678757],[-7.9075995,8.4691788],[-7.9071166,8.4700675],[-7.9056256,8.470797],[-7.9056329,8.4713152],[-7.9061,8.4718713],[-7.9079913,8.4722913],[-7.9090674,8.4727854],[-7.9099805,8.4736215],[-7.9109017,8.4746813],[-7.9115097,8.4766705],[-7.9117033,8.4779508],[-7.9115064,8.4795333],[-7.9116298,8.4798727],[-7.9119883,8.4800765],[-7.9133123,8.4799522],[-7.9139418,8.4802063],[-7.9144734,8.4810735],[-7.91462,8.4820826],[-7.9147014,8.4837243],[-7.9142239,8.4862737],[-7.9152701,8.4869341],[-7.9166272,8.4871517],[-7.9174882,8.4869952],[-7.9180796,8.4865986],[-7.9186811,8.4852861],[-7.9192983,8.4851073],[-7.920538,8.4853848],[-7.9208436,8.4858571],[-7.9201275,8.4869952],[-7.9185424,8.4881968],[-7.9180756,8.4889132],[-7.9164046,8.488762],[-7.9141636,8.488315],[-7.9121375,8.4870949],[-7.9112875,8.486886],[-7.9107778,8.486497],[-7.9102114,8.4865953],[-7.9096658,8.4869594],[-7.9089762,8.4880317],[-7.9078887,8.490266],[-7.9089628,8.4913912],[-7.9138994,8.4941291],[-7.9151431,8.4942501],[-7.918354,8.4934153],[-7.9188814,8.4940087],[-7.9189067,8.4945442],[-7.9191247,8.495102],[-7.9195774,8.4953571],[-7.9208009,8.4953035],[-7.9214219,8.4955396],[-7.92171,8.4959457],[-7.9222359,8.4973702],[-7.9235221,8.4984977],[-7.9239964,8.498746],[-7.925959,8.4983436],[-7.9263881,8.4979396],[-7.9269373,8.4979652],[-7.9271534,8.4983256],[-7.9271275,8.4989031],[-7.9265289,8.4996966],[-7.9265642,8.5002506],[-7.9269679,8.5009204],[-7.9284376,8.501427],[-7.9291878,8.5021322],[-7.9292154,8.5027645],[-7.9287689,8.5031616],[-7.9284982,8.5035257],[-7.9284115,8.504436],[-7.9287936,8.5051972],[-7.9292342,8.5053465],[-7.9299566,8.5057726],[-7.9301939,8.5062068],[-7.9302499,8.5068271],[-7.9305462,8.5078028],[-7.9307454,8.5088108],[-7.9310685,8.5097345],[-7.9316979,8.5099762],[-7.9332628,8.5096056],[-7.9338432,8.5091045],[-7.9345658,8.5069071],[-7.935651,8.5057734],[-7.9367791,8.5048929],[-7.9386451,8.5041525],[-7.9417634,8.5033829],[-7.9430436,8.5027887],[-7.9450636,8.4993871],[-7.9457003,8.4987217],[-7.9463294,8.4986654],[-7.9485521,8.499796],[-7.9503389,8.4996146],[-7.9517208,8.4997642],[-7.9525061,8.5005135],[-7.9535441,8.5006767],[-7.9555412,8.5006927],[-7.9562427,8.4997169],[-7.9565983,8.4990141],[-7.9564903,8.4973125],[-7.9567425,8.4960792],[-7.9570724,8.4960077],[-7.9576202,8.4962546],[-7.9586402,8.4972732],[-7.959576,8.498469],[-7.9605714,8.4991183],[-7.9612731,8.4999549],[-7.9623973,8.5020241],[-7.963348,8.5031054],[-7.9641124,8.5047331],[-7.9639545,8.5056968],[-7.963705,8.5063286],[-7.963855,8.5066164],[-7.9642894,8.5067729],[-7.9650427,8.5061933],[-7.9659098,8.5051732],[-7.9667912,8.503639],[-7.9679275,8.5031484],[-7.9690069,8.5026109],[-7.9692897,8.501967],[-7.9688131,8.5010165],[-7.9689022,8.5004276],[-7.9693645,8.5002805],[-7.9713377,8.5006996],[-7.9743406,8.5018733],[-7.9754043,8.5026212],[-7.9761423,8.5027046],[-7.9766106,8.502271],[-7.9774607,8.5004104],[-7.9767774,8.4972568],[-7.9761358,8.4942172],[-7.9762377,8.4923209],[-7.9758758,8.491197],[-7.9750283,8.4900198],[-7.9750918,8.4895727],[-7.9754882,8.4892798],[-7.9767733,8.4891195],[-7.9783205,8.489178],[-7.9797204,8.489514],[-7.9807771,8.4898511],[-7.9817823,8.4907271],[-7.9824251,8.490416],[-7.9832445,8.4894837],[-7.9836781,8.4891825],[-7.9860221,8.4886842],[-7.9871635,8.4881987],[-7.9877506,8.488386],[-7.9885001,8.4905684],[-7.9895812,8.4912539],[-7.9912144,8.4917244],[-7.9924809,8.492679],[-7.994713,8.4938776],[-7.9968956,8.4945111],[-7.9979825,8.4946775],[-7.9987228,8.4950702],[-7.999152,8.495675],[-7.9998171,8.496439],[-8.0004287,8.4969059],[-8.0012763,8.4970544],[-8.0016303,8.4967043],[-8.0018449,8.496057],[-8.0019522,8.4951869],[-8.0019307,8.4942637],[-8.0016303,8.4934573],[-8.0013621,8.4928524],[-8.0013943,8.4922051],[-8.0017805,8.4917489],[-8.0028749,8.4912395],[-8.0038297,8.4903588],[-8.0046129,8.4898388],[-8.0052567,8.4898919],[-8.0057287,8.4901466],[-8.0061793,8.4909106],[-8.006984,8.491717],[-8.0084968,8.4919929],[-8.0098057,8.4927994],[-8.011533,8.4927994],[-8.0127702,8.4932986],[-8.01427,8.4945321],[-8.015466,8.4959429],[-8.0168438,8.4982429],[-8.017273,8.5005773],[-8.0177733,8.5009409],[-8.018539,8.5009805],[-8.0234099,8.4986249],[-8.0246827,8.4984791],[-8.0256916,8.4990055],[-8.0266342,8.4997306],[-8.027795,8.499982],[-8.0288456,8.4996956],[-8.0298086,8.4989326],[-8.0309149,8.4973006],[-8.0317626,8.4969258],[-8.0329407,8.4973162],[-8.0352673,8.4973954],[-8.0369992,8.4975533],[-8.0380218,8.4979451],[-8.0389731,8.4987871],[-8.0407722,8.4993309],[-8.0414294,8.5002869],[-8.0421524,8.5008687],[-8.0437985,8.5013621],[-8.0447958,8.5008144],[-8.0456524,8.5011094],[-8.0475498,8.5013354],[-8.0480556,8.5023828],[-8.0478418,8.5036288],[-8.0479831,8.5044822],[-8.0484181,8.5054296],[-8.0491216,8.50613],[-8.0503676,8.5073702],[-8.0510674,8.5073996],[-8.0518007,8.507247],[-8.0527651,8.5072066],[-8.0538071,8.5074568],[-8.0544556,8.5073177],[-8.0553384,8.5068164],[-8.0575098,8.5051815],[-8.0581798,8.5052609],[-8.0589251,8.505688],[-8.0591923,8.5062643],[-8.0591584,8.5071353],[-8.0589489,8.5090327],[-8.0590485,8.5101461],[-8.0593843,8.5104898],[-8.0603452,8.5107677],[-8.0617738,8.5107303],[-8.062801,8.5111056],[-8.063482,8.5106975],[-8.06346,8.5097267],[-8.063802,8.5075467],[-8.0647142,8.5058177],[-8.0652842,8.5049532],[-8.0650942,8.5039007],[-8.0656263,8.5036376],[-8.0671085,8.5040511],[-8.0682815,8.5039776],[-8.0690629,8.503646],[-8.0695243,8.5031638],[-8.0698422,8.5021394],[-8.0698176,8.5013954],[-8.0696103,8.5007419],[-8.0698034,8.5003364],[-8.0703435,8.5002554],[-8.0712751,8.5006069],[-8.072042,8.5010001],[-8.0734666,8.501297],[-8.0745917,8.5016888],[-8.0772571,8.5021774],[-8.0792912,8.5027549],[-8.0820279,8.5029487],[-8.0831133,8.5031361],[-8.0841767,8.5035583],[-8.0855885,8.5046928],[-8.0862106,8.5057627],[-8.0861449,8.5063982],[-8.0854804,8.5090745],[-8.0856985,8.5094618],[-8.0871874,8.5097867],[-8.0876126,8.5100407],[-8.0877736,8.5103271],[-8.0877192,8.5106199],[-8.0878977,8.5109344],[-8.0883939,8.5109906],[-8.0901481,8.5087701],[-8.0903792,8.5082514],[-8.0905295,8.5073326],[-8.0904256,8.5064999],[-8.0905324,8.5056434],[-8.0910827,8.5042979],[-8.0914532,8.5037304],[-8.0915201,8.5031022],[-8.0914392,8.502421],[-8.0913257,8.5018091],[-8.0913859,8.5012308],[-8.0918979,8.500836],[-8.092607,8.4999662],[-8.0928503,8.4993223],[-8.0928,8.496947],[-8.0934616,8.4950668],[-8.0941103,8.4930059],[-8.0941735,8.4921636],[-8.0943609,8.4915601],[-8.0948941,8.4910699],[-8.0960735,8.4910316],[-8.0971027,8.4913581],[-8.0979108,8.4920135],[-8.0989018,8.4919765],[-8.0990966,8.4917329],[-8.0991601,8.4912846],[-8.0987188,8.4898421],[-8.0988591,8.4877181],[-8.0988636,8.4876358],[-8.0989351,8.4863653],[-8.1005308,8.4857641],[-8.1025444,8.4855386],[-8.1044441,8.4864029],[-8.1056978,8.486478],[-8.1063057,8.4846368],[-8.1073432,8.4840503],[-8.1073695,8.4840355],[-8.1086181,8.484076],[-8.109171,8.483785],[-8.1097659,8.4828366],[-8.1098091,8.4823544],[-8.1092262,8.4804135],[-8.1095351,8.4799772],[-8.1103021,8.4802421],[-8.1104624,8.4805973],[-8.1107951,8.4837129],[-8.1106244,8.4857408],[-8.1103236,8.4871442],[-8.1103135,8.4877503],[-8.1098935,8.4885385],[-8.1098189,8.4892625],[-8.1100559,8.4895946],[-8.1104459,8.4896997],[-8.1111082,8.4893928],[-8.1117049,8.4892322],[-8.1125104,8.4892231],[-8.1131792,8.4894469],[-8.114142,8.4902152],[-8.1144951,8.4903249],[-8.1153952,8.4902399],[-8.1159703,8.4899943],[-8.1177035,8.4895593],[-8.1181322,8.4889951],[-8.1183114,8.4865908],[-8.1188072,8.4857568],[-8.1200892,8.4856186],[-8.1208749,8.4859349],[-8.1213082,8.4863358],[-8.1218727,8.4867153],[-8.1230215,8.4869341],[-8.1238642,8.4872884],[-8.1243002,8.487622],[-8.1252423,8.488109],[-8.1262586,8.4881681],[-8.12731,8.4883591],[-8.1281004,8.4885897],[-8.1285714,8.4887271],[-8.1294563,8.4892791],[-8.1301174,8.4901362],[-8.1307155,8.4912501],[-8.1310858,8.4928603],[-8.1312738,8.4947551],[-8.1315179,8.4952819],[-8.1320776,8.4957256],[-8.1334697,8.4958459],[-8.1364116,8.4964656],[-8.1372464,8.4964846],[-8.1376818,8.4959103],[-8.1376265,8.4941771],[-8.1372243,8.4927257],[-8.1368129,8.4920197],[-8.1366927,8.4911531],[-8.1368827,8.4904357],[-8.1373265,8.4897307],[-8.1377857,8.4895402],[-8.138907,8.4895819],[-8.1396939,8.489783],[-8.1404329,8.489669],[-8.1420885,8.4874664],[-8.1424642,8.4873613],[-8.1438096,8.4876231],[-8.1453408,8.4877503],[-8.145959,8.4875291],[-8.1464423,8.4875302],[-8.147337,8.4877815],[-8.1477058,8.4875904],[-8.1477781,8.4871373],[-8.1474457,8.4866863],[-8.1467401,8.4861298],[-8.1451878,8.4855704],[-8.1442738,8.4850734],[-8.1442579,8.4846754],[-8.1446346,8.484455],[-8.1468927,8.4844285],[-8.1475184,8.4846235],[-8.1481895,8.4850926],[-8.1494443,8.4852881],[-8.1503472,8.4849522],[-8.1507538,8.4852935],[-8.1509611,8.4873809],[-8.1499113,8.4907367],[-8.1498899,8.4908053],[-8.1492183,8.4932232],[-8.1485198,8.4941265],[-8.1481974,8.4948705],[-8.1485467,8.4954551],[-8.149487,8.4957208],[-8.1527913,8.4955613],[-8.1558808,8.4956942],[-8.1572709,8.4961968],[-8.1580008,8.4956449],[-8.1593197,8.4938725],[-8.1598557,8.49282],[-8.1602723,8.4925462],[-8.1616971,8.4928025],[-8.1624277,8.4930937],[-8.1633715,8.4938841],[-8.1637022,8.4946804],[-8.1641532,8.4953715],[-8.1646282,8.4963397],[-8.165893,8.4977749],[-8.166688,8.4988982],[-8.1669141,8.4995225],[-8.1672728,8.5025507],[-8.1675869,8.5031293],[-8.1683173,8.5032105],[-8.1702748,8.5040271],[-8.1711048,8.5038911],[-8.1734724,8.5017329],[-8.1745441,8.5007166],[-8.1751828,8.5007667],[-8.1756767,8.5021714],[-8.175653,8.5033176],[-8.1760147,8.5037402],[-8.1772637,8.5045932],[-8.1784563,8.5053121],[-8.17947,8.5053809],[-8.1802808,8.5053352],[-8.1815449,8.5047279],[-8.1821086,8.5046873],[-8.1831118,8.5050958],[-8.1837754,8.5051009],[-8.1843607,8.5047859],[-8.1847577,8.504796],[-8.185695,8.5051548],[-8.1876418,8.5061062],[-8.1884704,8.5068201],[-8.1887768,8.5066506],[-8.1893793,8.5053217],[-8.1896726,8.503692],[-8.1901266,8.5028182],[-8.190281,8.5016722],[-8.1902519,8.5010618],[-8.1899304,8.5008532],[-8.1885398,8.5006125],[-8.1875817,8.4999446],[-8.1875215,8.499669],[-8.1879203,8.4988823],[-8.1881456,8.4982183],[-8.1889784,8.4975275],[-8.1899993,8.4952691],[-8.192444,8.493728],[-8.1930887,8.4925855],[-8.1947812,8.490513],[-8.1941902,8.4888656],[-8.1948887,8.4868728],[-8.1965812,8.4859428],[-8.1975787,8.4852542],[-8.1974594,8.4840767],[-8.1976202,8.4835969],[-8.1986718,8.4830126],[-8.1997523,8.482763],[-8.2010461,8.4817089],[-8.2012048,8.4803348],[-8.2018797,8.4802907],[-8.2024406,8.4810277],[-8.202895,8.480902],[-8.2032061,8.4806326],[-8.203338,8.4798234],[-8.2031542,8.4787171],[-8.2034866,8.4781933],[-8.2041657,8.4779415],[-8.205045,8.4778481],[-8.2058355,8.4761757],[-8.206585,8.475481],[-8.2084757,8.4754398],[-8.2092755,8.4747862],[-8.2108178,8.473427],[-8.2122499,8.4732786],[-8.2129263,8.4746723],[-8.214037,8.4746378],[-8.2156293,8.4743389],[-8.2163034,8.4736312],[-8.2168344,8.472664],[-8.2173519,8.4711876],[-8.2180167,8.4698433],[-8.2179361,8.4693905],[-8.2168873,8.4687018],[-8.2166483,8.4683367],[-8.2166408,8.4678401],[-8.2162993,8.4675136],[-8.2157404,8.4672775],[-8.2151708,8.4667078],[-8.2147905,8.4659094],[-8.2147531,8.464628],[-8.2145113,8.4637511],[-8.2155053,8.4633791],[-8.2172808,8.4637373],[-8.2200186,8.4650532],[-8.2213185,8.4651677],[-8.2224677,8.4646962],[-8.2246407,8.4641279],[-8.2248404,8.4637204],[-8.2247388,8.461986],[-8.2251746,8.4619134],[-8.2258713,8.4625846],[-8.2269123,8.4638937],[-8.2275032,8.4651],[-8.2275132,8.4655723],[-8.227283,8.4662251],[-8.2273483,8.4665947],[-8.2275779,8.466812],[-8.2283107,8.4666832],[-8.2284668,8.4670758],[-8.2278369,8.4678131],[-8.2277031,8.4681956],[-8.2278777,8.4685588],[-8.2275886,8.468817],[-8.227123,8.4688417],[-8.2268485,8.4686165],[-8.2267091,8.4678467],[-8.2262663,8.4675972],[-8.2259167,8.467714],[-8.2257653,8.4679618],[-8.2253773,8.4690854],[-8.2255528,8.4693273],[-8.2261365,8.4694274],[-8.2264849,8.4695829],[-8.2267285,8.4706394],[-8.2270223,8.47086],[-8.2276629,8.4703272],[-8.2283001,8.4694821],[-8.2283853,8.4686496],[-8.2287079,8.4683563],[-8.2296175,8.467945],[-8.2305555,8.4674311],[-8.2314341,8.4660988],[-8.2321312,8.4657835],[-8.2326563,8.4658994],[-8.233643,8.4659905],[-8.2343988,8.4657331],[-8.2354221,8.4651392],[-8.2358548,8.4645075],[-8.2368318,8.4617619],[-8.2380524,8.4596482],[-8.238103,8.4590422],[-8.2376971,8.4583103],[-8.237138,8.4571026],[-8.2361257,8.456336],[-8.23584,8.4560666],[-8.2347798,8.4557331],[-8.234539,8.4555198],[-8.2345466,8.4551877],[-8.234844,8.4541962],[-8.2352125,8.4536809],[-8.2355119,8.4528666],[-8.2359111,8.4524482],[-8.2363748,8.4516879],[-8.2377066,8.4511477],[-8.238062,8.4501738],[-8.2379863,8.4496909],[-8.2374323,8.4491049],[-8.2368795,8.4483872],[-8.2364767,8.4479924],[-8.2361294,8.4473424],[-8.2363263,8.4470837],[-8.2375175,8.4465854],[-8.2383295,8.4458647],[-8.2388154,8.4452901],[-8.2391157,8.4452041],[-8.239766,8.4443999],[-8.2397155,8.4443289],[-8.2396841,8.444193],[-8.2396371,8.443807],[-8.2393891,8.443525],[-8.2393841,8.443151],[-8.2399441,8.442674],[-8.2399501,8.442409],[-8.2397931,8.442044],[-8.2400231,8.441791],[-8.2398721,8.441512],[-8.2399491,8.441048],[-8.2393981,8.439867],[-8.2394761,8.439482],[-8.2396391,8.43914],[-8.2394151,8.438528],[-8.2394551,8.438241],[-8.2397051,8.43783],[-8.2396341,8.437277],[-8.2393661,8.43667],[-8.2393121,8.436135],[-8.2393701,8.435621],[-8.2399541,8.435033],[-8.2399611,8.434849],[-8.2397341,8.434803],[-8.2399261,8.434512],[-8.2400431,8.433928],[-8.2399411,8.433841],[-8.2399651,8.433661],[-8.2400321,8.433599],[-8.2400701,8.433473],[-8.2400251,8.433253],[-8.2402181,8.433098],[-8.2401951,8.432965],[-8.2400631,8.432761],[-8.2401091,8.432576],[-8.2404041,8.432282],[-8.2407201,8.431134],[-8.2408981,8.431148],[-8.2409431,8.431094],[-8.2409631,8.430809],[-8.2405951,8.429964],[-8.2404721,8.429548],[-8.2405651,8.429335],[-8.2405281,8.428799],[-8.2404131,8.428572],[-8.2400211,8.428301],[-8.2400371,8.427753],[-8.2399661,8.427339],[-8.2392021,8.426805],[-8.2389331,8.426361],[-8.2385671,8.425987],[-8.2382401,8.425887],[-8.2381371,8.425593],[-8.2375771,8.425253],[-8.2369431,8.425091],[-8.2367701,8.424807],[-8.2365931,8.424672],[-8.2364901,8.424444],[-8.2358371,8.424051],[-8.2356401,8.423876],[-8.2356541,8.423679],[-8.2346071,8.423453],[-8.2344791,8.423301],[-8.2345631,8.422857],[-8.2341731,8.422584],[-8.2345341,8.421056],[-8.2344981,8.419971],[-8.2347931,8.419025],[-8.2353971,8.417998],[-8.2380121,8.415615],[-8.2360521,8.413698],[-8.2345601,8.412386],[-8.2334681,8.411729],[-8.2323361,8.410943],[-8.2313441,8.410033],[-8.2305791,8.408999],[-8.2299441,8.408231],[-8.2287431,8.406566],[-8.2268091,8.404543],[-8.2260201,8.403404],[-8.2262991,8.401415],[-8.2273401,8.400821],[-8.2274751,8.400669],[-8.2278051,8.400648],[-8.2285581,8.400486],[-8.2293691,8.400095],[-8.2302991,8.399506],[-8.2306241,8.398813],[-8.2305081,8.398232],[-8.2305661,8.398046],[-8.2307961,8.397637],[-8.2305711,8.396054],[-8.2307391,8.395393],[-8.2310171,8.395037],[-8.2309711,8.394699],[-8.2305861,8.394719],[-8.2305011,8.39456],[-8.2305661,8.393301],[-8.2304621,8.393218],[-8.2305121,8.39291],[-8.2304471,8.392535],[-8.2302271,8.392414],[-8.2301301,8.392469],[-8.2300981,8.392604],[-8.2299131,8.392579],[-8.2299051,8.392301],[-8.2296331,8.392145],[-8.2293871,8.391666],[-8.2298741,8.391514],[-8.2297681,8.391243],[-8.2301631,8.390279],[-8.2303021,8.38949],[-8.2296381,8.389185],[-8.2302591,8.387622],[-8.2302581,8.387042],[-8.2301281,8.385569],[-8.2298311,8.385513],[-8.2298051,8.385243],[-8.2290831,8.384345],[-8.2291671,8.384002],[-8.2287181,8.383294],[-8.2289381,8.382844],[-8.2271041,8.38074],[-8.2271801,8.380526],[-8.2267521,8.380369],[-8.2258701,8.380175],[-8.2255731,8.380524],[-8.2252791,8.380493],[-8.2249741,8.380303],[-8.2250421,8.380196],[-8.2250881,8.379794],[-8.2250371,8.379721],[-8.2244081,8.379272],[-8.2241381,8.379165],[-8.2240701,8.378794],[-8.2238991,8.378399],[-8.2229611,8.377302],[-8.2224351,8.376867],[-8.2221301,8.376314],[-8.2216771,8.376181],[-8.2211321,8.375157],[-8.2204801,8.374286],[-8.2195591,8.373974],[-8.2195261,8.373433],[-8.2196731,8.372665],[-8.2200641,8.372135],[-8.2198501,8.371183],[-8.2198071,8.370561],[-8.2198741,8.369929],[-8.2195301,8.36983],[-8.2193431,8.369026],[-8.2189931,8.368399],[-8.2192651,8.367987],[-8.2189061,8.3677],[-8.2186301,8.367551],[-8.2185651,8.367352],[-8.2188971,8.367318],[-8.2190891,8.367062],[-8.2191471,8.366293],[-8.2188271,8.365925],[-8.2187221,8.365377],[-8.2190001,8.36495],[-8.2187651,8.364851],[-8.2185651,8.36464],[-8.2182931,8.364677],[-8.2180691,8.364552],[-8.2181781,8.364254],[-8.2181641,8.364077],[-8.2183491,8.363842],[-8.2183451,8.363685],[-8.2181961,8.363443],[-8.2181131,8.363137],[-8.2169221,8.362391],[-8.2162951,8.361098],[-8.2157231,8.360207],[-8.2150071,8.35958],[-8.2152921,8.358752],[-8.2157501,8.35863],[-8.2158741,8.358444],[-8.2158241,8.358276],[-8.2155351,8.358164],[-8.2151631,8.358304],[-8.2150191,8.35826],[-8.2149651,8.358161],[-8.2149651,8.357937],[-8.2151051,8.357678],[-8.2154781,8.357445],[-8.2154201,8.356996],[-8.2166281,8.355356],[-8.2170331,8.353787],[-8.2173261,8.353275],[-8.2177381,8.353077],[-8.2178541,8.352752],[-8.2178311,8.352729],[-8.2177541,8.352723],[-8.2176221,8.352789],[-8.2175591,8.352899],[-8.2173551,8.352717],[-8.2174321,8.352468],[-8.2178141,8.352513],[-8.2177651,8.352266],[-8.2177991,8.351986],[-8.2177191,8.351941],[-8.2174761,8.352077],[-8.2173991,8.352013],[-8.2173191,8.351826],[-8.2173451,8.351752],[-8.2174561,8.35168],[-8.2176461,8.351655],[-8.2175781,8.351479],[-8.2176171,8.351286],[-8.2178431,8.351393],[-8.2180921,8.351227],[-8.2181391,8.351047],[-8.2177821,8.350856],[-8.2178041,8.350719],[-8.2182271,8.350651],[-8.2186091,8.350434],[-8.2186341,8.350068],[-8.2194601,8.349761],[-8.2197731,8.349715],[-8.2197661,8.350148],[-8.2201541,8.350126],[-8.2202271,8.349739],[-8.2199211,8.349094],[-8.2206101,8.348187],[-8.2209971,8.346908],[-8.2212521,8.346258],[-8.2212971,8.345011],[-8.2214981,8.344177],[-8.2218301,8.343501],[-8.2220151,8.341702],[-8.2213771,8.339009],[-8.2216701,8.33854],[-8.2221811,8.338561],[-8.2225861,8.337704],[-8.2225251,8.336688],[-8.2227221,8.336204],[-8.2225011,8.335508],[-8.2227991,8.335132],[-8.2232811,8.334694],[-8.2242771,8.334129],[-8.2254421,8.33334],[-8.2253341,8.332668],[-8.2255131,8.332232],[-8.2260651,8.331617],[-8.2264651,8.331397],[-8.2266981,8.330722],[-8.2264971,8.329998],[-8.2266311,8.329186],[-8.2269051,8.329013],[-8.2274981,8.328274],[-8.2274401,8.327472],[-8.2270041,8.327123],[-8.2269941,8.326832],[-8.2270601,8.326592],[-8.2272271,8.326411],[-8.2274181,8.326059],[-8.2275931,8.325837],[-8.2277731,8.326283],[-8.2279241,8.326138],[-8.2281061,8.325687],[-8.2281411,8.325288],[-8.2280591,8.325117],[-8.2274531,8.324404],[-8.2276931,8.32382],[-8.2276551,8.323313],[-8.2284271,8.323664],[-8.2286891,8.323551],[-8.2287901,8.323119],[-8.2286851,8.322272],[-8.2280421,8.321348],[-8.2278281,8.320905],[-8.2274401,8.320881],[-8.2272051,8.32066],[-8.2272111,8.32045],[-8.2273951,8.320371],[-8.2273451,8.320191],[-8.2273311,8.319766],[-8.2272101,8.319472],[-8.2268951,8.319432],[-8.2267131,8.319258],[-8.2264411,8.318859],[-8.2262981,8.317955],[-8.2255841,8.317383],[-8.2254181,8.316622],[-8.2249651,8.315789],[-8.2247521,8.314933],[-8.2248531,8.31424],[-8.2245141,8.313648],[-8.2243711,8.31272],[-8.2240381,8.311887],[-8.2242101,8.310868],[-8.2242041,8.310031],[-8.2243891,8.308065],[-8.2237281,8.307271],[-8.2231231,8.30765],[-8.2228801,8.306342],[-8.2224321,8.306099],[-8.2224251,8.305935],[-8.2225981,8.30561],[-8.2230951,8.305738],[-8.2231721,8.304891],[-8.2226221,8.303835],[-8.2218681,8.303733],[-8.2212891,8.303514],[-8.2209101,8.30269],[-8.2211971,8.302357],[-8.2211501,8.302204],[-8.2208791,8.30226],[-8.2206571,8.30222],[-8.2208471,8.301725],[-8.2208581,8.301598],[-8.2201591,8.3016],[-8.2198511,8.301696],[-8.2196251,8.301647],[-8.2195551,8.301181],[-8.2197121,8.300344],[-8.2191921,8.299778],[-8.2185241,8.299221],[-8.2187281,8.297804],[-8.2185861,8.297081],[-8.2184921,8.296858],[-8.2183751,8.296723],[-8.2179301,8.296778],[-8.2178411,8.296669],[-8.2178611,8.296531],[-8.2178151,8.296445],[-8.2176641,8.296395],[-8.2178331,8.295827],[-8.2183611,8.294581],[-8.2184191,8.293896],[-8.2190881,8.293522],[-8.2192431,8.292817],[-8.2190861,8.292495],[-8.2196831,8.290441],[-8.2196001,8.289882],[-8.2193041,8.289825],[-8.2192621,8.289658],[-8.2192891,8.289359],[-8.2194091,8.289145],[-8.2196051,8.289045],[-8.2196131,8.288929],[-8.2194921,8.288876],[-8.2194841,8.288655],[-8.2195911,8.28857],[-8.2195741,8.288441],[-8.2197671,8.288279],[-8.2200781,8.28822],[-8.2204951,8.287666],[-8.2205271,8.287343],[-8.2206351,8.287047],[-8.2206551,8.286565],[-8.2209151,8.286289],[-8.2209901,8.286042],[-8.2211691,8.285717],[-8.2220761,8.284428],[-8.2228951,8.283548],[-8.2231081,8.282817],[-8.2233731,8.282286],[-8.2233201,8.28185],[-8.2233551,8.281734],[-8.2235661,8.281504],[-8.2235111,8.281047],[-8.2238671,8.279862],[-8.2237911,8.279258],[-8.2231601,8.278865],[-8.2231441,8.278562],[-8.2228981,8.278404],[-8.2228671,8.27827],[-8.2228921,8.278159],[-8.2230841,8.278035],[-8.2229431,8.27795],[-8.2226791,8.277996],[-8.2226891,8.277882],[-8.2228101,8.277822],[-8.2228371,8.277745],[-8.2227521,8.277692],[-8.2226701,8.277547],[-8.2226891,8.277447],[-8.2228721,8.277336],[-8.2229101,8.277233],[-8.2228971,8.277088],[-8.2226571,8.276885],[-8.2224271,8.27617],[-8.2226651,8.275848],[-8.2236701,8.27532],[-8.2240491,8.275291],[-8.2241701,8.275364],[-8.2241621,8.275715],[-8.2242571,8.27575],[-8.2245171,8.275599],[-8.2246491,8.27557],[-8.2246871,8.275611],[-8.2246141,8.275723],[-8.2246591,8.275812],[-8.2248641,8.275753],[-8.2252801,8.275499],[-8.2254231,8.275203],[-8.2254711,8.27491],[-8.2269131,8.274004],[-8.2285951,8.273574],[-8.2285881,8.273008],[-8.2284311,8.272696],[-8.2286891,8.272411],[-8.2293011,8.272321],[-8.2298241,8.272392],[-8.2302561,8.272509],[-8.2304361,8.27251],[-8.2304261,8.272243],[-8.2304791,8.272022],[-8.2308451,8.271603],[-8.2310621,8.271584],[-8.2311791,8.271481],[-8.2314851,8.271418],[-8.2317391,8.271454],[-8.2317151,8.271773],[-8.2317951,8.27184],[-8.2319041,8.271824],[-8.2320151,8.271736],[-8.2322271,8.271755],[-8.2323101,8.27149],[-8.2325851,8.271528],[-8.2326211,8.271367],[-8.2328211,8.271229],[-8.2329841,8.271246],[-8.2331541,8.271333],[-8.2332361,8.271267],[-8.2333431,8.271266],[-8.2334331,8.271092],[-8.2337071,8.271015],[-8.2339711,8.270724],[-8.2339811,8.270528],[-8.2339451,8.270467],[-8.2342131,8.270288],[-8.2345471,8.269898],[-8.2344111,8.269723],[-8.2348341,8.26948],[-8.2350671,8.269418],[-8.2351391,8.269177],[-8.2352251,8.269119],[-8.2355331,8.269278],[-8.2356161,8.269275],[-8.2357721,8.26866],[-8.2361211,8.268],[-8.2361841,8.267989],[-8.2362431,8.268064],[-8.2363991,8.268363],[-8.2365581,8.26837],[-8.2366841,8.268304],[-8.2365211,8.26797],[-8.2365691,8.267895],[-8.2367361,8.26794],[-8.2369901,8.26781],[-8.2370391,8.267962],[-8.2371371,8.267983],[-8.2372311,8.267809],[-8.2371931,8.267605],[-8.2372291,8.267477],[-8.2372821,8.267443],[-8.2375341,8.26748],[-8.2375861,8.267741],[-8.2379371,8.26761],[-8.2378791,8.267468],[-8.2379821,8.267176],[-8.2380681,8.267146],[-8.2382741,8.267221],[-8.2384281,8.267161],[-8.2384611,8.266976],[-8.2381861,8.266619],[-8.2382911,8.266466],[-8.2384751,8.266517],[-8.2385201,8.266116],[-8.2383471,8.265786],[-8.2387371,8.265518],[-8.2387241,8.265077],[-8.2386401,8.264747],[-8.2385381,8.263638],[-8.2391991,8.263297],[-8.2392031,8.261927],[-8.2391371,8.2614],[-8.2387311,8.260874],[-8.2389561,8.259108],[-8.2395011,8.258478],[-8.2401411,8.258721],[-8.2405921,8.25725],[-8.2414391,8.257058],[-8.2417601,8.256689],[-8.2414891,8.256172],[-8.2410991,8.255712],[-8.2417411,8.254804],[-8.2423251,8.253637],[-8.2429651,8.253105],[-8.2428551,8.252353],[-8.2424471,8.251893],[-8.2433101,8.250998],[-8.2435741,8.250789],[-8.2437531,8.250386],[-8.2436681,8.249944],[-8.2434371,8.24968],[-8.2430831,8.249636],[-8.2424821,8.249721],[-8.2420261,8.249285],[-8.2420761,8.248664],[-8.2424521,8.24832],[-8.2424821,8.247642],[-8.2417521,8.246896],[-8.2414991,8.246231],[-8.2407761,8.245868],[-8.2404311,8.245403],[-8.2404761,8.245098],[-8.2408121,8.244927],[-8.2413231,8.244842],[-8.2416081,8.244506],[-8.2417361,8.244074],[-8.2417201,8.243268],[-8.2418891,8.242767],[-8.2419211,8.24239],[-8.2418061,8.241237],[-8.2429731,8.24043],[-8.2431541,8.240015],[-8.2432091,8.239632],[-8.2429871,8.239214],[-8.2425111,8.238935],[-8.2426771,8.238674],[-8.2432591,8.238243],[-8.2431771,8.237456],[-8.2427331,8.237075],[-8.2427461,8.236802],[-8.2435501,8.236008],[-8.2434491,8.235372],[-8.2424611,8.233701],[-8.2416811,8.234133],[-8.2412721,8.233563],[-8.2403571,8.233743],[-8.2401801,8.23436],[-8.2398971,8.234467],[-8.2390191,8.234113],[-8.2371601,8.23313],[-8.2357201,8.232729],[-8.2343671,8.232506],[-8.2339741,8.232322],[-8.2338201,8.232197],[-8.2322811,8.233021],[-8.2314931,8.233269],[-8.2313211,8.232774],[-8.2308651,8.232515],[-8.2306701,8.232481],[-8.2304401,8.232235],[-8.2300791,8.231981],[-8.2292051,8.231469],[-8.2290491,8.231433],[-8.2284951,8.230948],[-8.2277191,8.231029],[-8.2273041,8.230742],[-8.2267281,8.230261],[-8.2266781,8.229889],[-8.2266031,8.229708],[-8.2267371,8.229616],[-8.2269741,8.229559],[-8.2268961,8.22911],[-8.2266231,8.22892],[-8.2261771,8.228323],[-8.2256061,8.228891],[-8.2248871,8.229007],[-8.2244861,8.229494],[-8.2238001,8.229677],[-8.2231171,8.230691],[-8.2221341,8.230866],[-8.2214821,8.230685],[-8.2212461,8.230103],[-8.2205281,8.229697],[-8.2192021,8.22909],[-8.2174021,8.2288],[-8.2171781,8.228861],[-8.2165041,8.228407],[-8.2159731,8.228309],[-8.2154461,8.228336],[-8.2141991,8.227159],[-8.2132611,8.226716],[-8.2117471,8.226865],[-8.2114821,8.226519],[-8.2107211,8.22608],[-8.2101001,8.225655],[-8.2091481,8.225512],[-8.2079491,8.224732],[-8.2068851,8.225043],[-8.2066991,8.224272],[-8.2065791,8.224057],[-8.2062641,8.223966],[-8.2058141,8.223645],[-8.2059861,8.222465],[-8.2062271,8.221501],[-8.2062461,8.220833],[-8.2061371,8.219776],[-8.2062211,8.219249],[-8.2065411,8.218038],[-8.2063271,8.217129],[-8.2054341,8.217028],[-8.2054751,8.215948],[-8.2051651,8.215258],[-8.2046521,8.214585],[-8.2045791,8.213585],[-8.2041351,8.21231],[-8.2014711,8.213216],[-8.2008121,8.213131],[-8.1993231,8.214232],[-8.1986991,8.214635],[-8.1980811,8.214928],[-8.1976741,8.215218],[-8.1973811,8.215055],[-8.1971681,8.215015],[-8.1966611,8.215715],[-8.1958061,8.215903],[-8.1948681,8.215194],[-8.1939901,8.21473],[-8.1934601,8.214314],[-8.1937651,8.213501],[-8.1937841,8.213295],[-8.1937401,8.211832],[-8.1935711,8.210978],[-8.1924591,8.209799],[-8.1919631,8.207726],[-8.1893511,8.206642],[-8.1883471,8.206735],[-8.1847311,8.207568],[-8.1851271,8.205154],[-8.1850491,8.20391],[-8.1844141,8.202715],[-8.1835771,8.20186],[-8.1822341,8.201487],[-8.1821711,8.200754],[-8.1818411,8.200258],[-8.1813651,8.199725],[-8.1805731,8.198392],[-8.1802301,8.196659],[-8.1791471,8.195113],[-8.1781641,8.194203],[-8.1770811,8.193284],[-8.1764121,8.191229],[-8.1762721,8.190453],[-8.1762981,8.189726],[-8.1758971,8.188059],[-8.1756281,8.187338],[-8.1749001,8.18628],[-8.1736071,8.184833],[-8.1721931,8.184563],[-8.1705811,8.184158],[-8.1666181,8.183816],[-8.1652501,8.183916],[-8.1648571,8.183788],[-8.1642451,8.185383],[-8.1634451,8.187653],[-8.1602791,8.18737],[-8.1594261,8.18769],[-8.1590361,8.187749],[-8.1578361,8.187634],[-8.1568261,8.187121],[-8.1557911,8.187133],[-8.1554261,8.184843],[-8.1552951,8.184387],[-8.1530581,8.184506],[-8.1528851,8.184653],[-8.1528171,8.184543],[-8.1524591,8.184721],[-8.1520841,8.184665],[-8.1515371,8.185019],[-8.1515441,8.184701],[-8.1508891,8.184862],[-8.1506741,8.185043],[-8.1502781,8.185269],[-8.1498751,8.18543],[-8.1496561,8.185839],[-8.1481921,8.186561],[-8.1477261,8.187195],[-8.1470821,8.187226],[-8.1463971,8.187923],[-8.1442931,8.189268],[-8.1437021,8.189242],[-8.1430621,8.189765],[-8.1417501,8.190404],[-8.1410951,8.190419],[-8.1305141,8.187255],[-8.1249341,8.184956],[-8.1164771,8.182134],[-8.1159581,8.181504],[-8.1146511,8.179688],[-8.1141371,8.179665],[-8.1137961,8.179956],[-8.1138301,8.18028],[-8.1140181,8.180634],[-8.1138171,8.180911],[-8.1131171,8.180831],[-8.1124611,8.181374],[-8.1116741,8.181867],[-8.1103961,8.183327],[-8.1100671,8.183548],[-8.1098991,8.183749],[-8.1092241,8.183882],[-8.1087331,8.183729],[-8.1085261,8.183498],[-8.1078201,8.18343],[-8.1067851,8.183201],[-8.1063651,8.18291],[-8.1056071,8.182788],[-8.1053701,8.182884],[-8.1049081,8.182877],[-8.1043741,8.182653],[-8.1037361,8.182115],[-8.1033471,8.182026],[-8.1026091,8.181527],[-8.1014431,8.181384],[-8.1002911,8.181936],[-8.0999191,8.181849],[-8.0992501,8.181118],[-8.0995591,8.180915],[-8.0995371,8.180643],[-8.0991531,8.180297],[-8.0985591,8.179941],[-8.0983721,8.179751],[-8.0986161,8.179464],[-8.0988771,8.179334],[-8.0988761,8.179148],[-8.0983291,8.179],[-8.0981931,8.178439],[-8.0979271,8.178301],[-8.0975621,8.178025],[-8.0969941,8.177748],[-8.0963541,8.177608],[-8.0960881,8.177466],[-8.0955501,8.177301],[-8.0954911,8.177585],[-8.0953671,8.17767],[-8.0954791,8.178305],[-8.0953681,8.178527],[-8.0951451,8.178612],[-8.0941741,8.178661],[-8.0935831,8.178741],[-8.0935151,8.178587],[-8.0937261,8.178471],[-8.0936791,8.178332],[-8.0936911,8.178205],[-8.0933561,8.178057],[-8.0930211,8.178123],[-8.0929131,8.177932],[-8.0929531,8.177673],[-8.0926841,8.177668],[-8.0925791,8.177491],[-8.0923551,8.17734],[-8.0921131,8.177296],[-8.0915981,8.17755],[-8.0911271,8.177292],[-8.0909311,8.177285],[-8.0906391,8.177435],[-8.0904011,8.177434],[-8.0900101,8.177271],[-8.0898831,8.177145],[-8.0894931,8.177279],[-8.0891851,8.177226],[-8.0889001,8.17688],[-8.0885841,8.176595],[-8.0884341,8.176046],[-8.0885781,8.175664],[-8.0886451,8.17533],[-8.0886251,8.174915],[-8.0885011,8.17474],[-8.0881581,8.174364],[-8.0879351,8.174443],[-8.0875741,8.174496],[-8.0870861,8.174398],[-8.0869231,8.174068],[-8.0865701,8.173833],[-8.0866091,8.173672],[-8.0870681,8.17339],[-8.0872151,8.173176],[-8.0873921,8.172614],[-8.0872771,8.172445],[-8.0872371,8.172255],[-8.0870341,8.172082],[-8.0865121,8.172026],[-8.0863861,8.172136],[-8.0861691,8.172187],[-8.0859971,8.172337],[-8.0855691,8.172397],[-8.0853161,8.172324],[-8.0851951,8.172098],[-8.0850571,8.172024],[-8.0848881,8.172025],[-8.0848031,8.171981],[-8.0846441,8.172028],[-8.0844821,8.172007],[-8.0837721,8.171429],[-8.0829001,8.171274],[-8.0820491,8.171018],[-8.0815891,8.170274],[-8.0812391,8.170047],[-8.0808651,8.169893],[-8.0806971,8.169702],[-8.0804691,8.169608],[-8.0802551,8.169715],[-8.0800261,8.169715],[-8.0798391,8.16985],[-8.0796641,8.169903],[-8.0792011,8.16975],[-8.0791511,8.169129],[-8.0792701,8.16853],[-8.0794211,8.168269],[-8.0794161,8.168138],[-8.0791991,8.167956],[-8.0790321,8.167403],[-8.0786741,8.167167],[-8.0785171,8.167602],[-8.0781121,8.167502],[-8.0775551,8.167174],[-8.0775131,8.166785],[-8.0773101,8.166669],[-8.0775691,8.166284],[-8.0775911,8.16607],[-8.0774021,8.16585],[-8.0773151,8.165889],[-8.0771891,8.165776],[-8.0770781,8.165433],[-8.0771721,8.165168],[-8.0773591,8.164958],[-8.0771451,8.164532],[-8.0767811,8.164431],[-8.0764891,8.163386],[-8.0761511,8.1627],[-8.0761411,8.162362],[-8.0762771,8.162334],[-8.0763851,8.162001],[-8.0763821,8.161886],[-8.0757541,8.161124],[-8.0755201,8.161319],[-8.0753031,8.161612],[-8.0746231,8.161285],[-8.0739231,8.161383],[-8.0733141,8.161243],[-8.0727051,8.161017],[-8.0716901,8.160865],[-8.0711881,8.160457],[-8.0710341,8.16009],[-8.0707471,8.159857],[-8.0703921,8.15981],[-8.0702701,8.159632],[-8.0702631,8.159292],[-8.0701981,8.159131],[-8.0697181,8.158694],[-8.0694171,8.158543],[-8.0692271,8.158628],[-8.0690551,8.158567],[-8.0686211,8.158543],[-8.0680261,8.158119],[-8.0679611,8.157846],[-8.0679911,8.157688],[-8.0678661,8.157473],[-8.0674451,8.157465],[-8.0667321,8.157572],[-8.0664631,8.157725],[-8.0662921,8.157526],[-8.0656821,8.15782],[-8.0654951,8.158203],[-8.0656251,8.158511],[-8.0655901,8.158578],[-8.0653921,8.158545],[-8.0652321,8.158743],[-8.0648821,8.158879],[-8.0645811,8.158749],[-8.0643701,8.158556],[-8.0640621,8.158585],[-8.0636761,8.158506],[-8.0634971,8.158316],[-8.0634481,8.158059],[-8.0629171,8.15817],[-8.0629371,8.157742],[-8.0630841,8.15751],[-8.0626461,8.157612],[-8.0626131,8.157452],[-8.0626381,8.157288],[-8.0625241,8.157136],[-8.0617781,8.157187],[-8.0607431,8.157656],[-8.0603611,8.15792],[-8.0601551,8.157715],[-8.0599001,8.157864],[-8.0599191,8.158325],[-8.0598171,8.158469],[-8.0596501,8.158383],[-8.0594491,8.158464],[-8.0591211,8.158819],[-8.0589941,8.158838],[-8.0585131,8.158769],[-8.0579941,8.158579],[-8.0574061,8.158605],[-8.0566031,8.158023],[-8.0562111,8.15796],[-8.0558691,8.157694],[-8.0556541,8.157416],[-8.0552471,8.157384],[-8.0549591,8.157154],[-8.0547221,8.157051],[-8.0544961,8.156844],[-8.0542301,8.156722],[-8.0539991,8.156549],[-8.0535271,8.156152],[-8.0533591,8.155472],[-8.0532191,8.155182],[-8.0526921,8.154895],[-8.0524711,8.154901],[-8.0523951,8.154956],[-8.0522001,8.154939],[-8.0518641,8.154799],[-8.0514971,8.154888],[-8.0516331,8.155265],[-8.0515141,8.155624],[-8.0519031,8.155586],[-8.0521441,8.15579],[-8.0521881,8.156789],[-8.0525211,8.157972],[-8.0525601,8.160641],[-8.0518951,8.161253],[-8.0468541,8.163789],[-8.0467631,8.164555],[-8.0464211,8.164775],[-8.0456941,8.164475],[-8.0454521,8.164653],[-8.0446431,8.166216],[-8.0446421,8.166737],[-8.0441781,8.16807],[-8.0436991,8.168604],[-8.0431981,8.169057],[-8.0430661,8.169724],[-8.0433191,8.170008],[-8.0435611,8.170397],[-8.0436291,8.17071],[-8.0445141,8.171277],[-8.0445851,8.171348],[-8.0446841,8.17159],[-8.0450641,8.171522],[-8.0451951,8.171594],[-8.0448001,8.172287],[-8.0449341,8.172587],[-8.0448551,8.172855],[-8.0448391,8.173337],[-8.0450491,8.174346],[-8.0441061,8.175514],[-8.0437411,8.176117],[-8.0436561,8.176836],[-8.0435011,8.177097],[-8.0426571,8.178121],[-8.0423751,8.178594],[-8.0420451,8.180446],[-8.0417521,8.180921],[-8.0413891,8.181822],[-8.0407291,8.182353],[-8.0398311,8.183331],[-8.0390671,8.18338],[-8.0366901,8.181907],[-8.0352761,8.18116],[-8.0335231,8.180477],[-8.0327981,8.181444],[-8.0334231,8.18245],[-8.0335431,8.182999],[-8.0333001,8.183831],[-8.0343101,8.185121],[-8.0336781,8.186111],[-8.0338761,8.186969],[-8.0339981,8.188255],[-8.0344111,8.19021],[-8.0346651,8.190258],[-8.0349881,8.192098],[-8.0354641,8.192998],[-8.0346911,8.19463],[-8.0304111,8.194231],[-8.0279111,8.194128],[-8.0247521,8.193317],[-8.0254221,8.19192],[-8.0256221,8.191614],[-8.0257921,8.191496],[-8.0258651,8.191393],[-8.0258921,8.191254],[-8.0260591,8.190977],[-8.0258521,8.190833],[-8.0253021,8.190863],[-8.0250271,8.190822],[-8.0250021,8.190343],[-8.0248971,8.189885],[-8.0248961,8.189631],[-8.0247631,8.189456],[-8.0246191,8.189359],[-8.0243851,8.189285],[-8.0242411,8.189047],[-8.0242281,8.188823],[-8.0237011,8.187822],[-8.0222781,8.186188],[-8.0213821,8.184581],[-8.0209741,8.183527],[-8.0204071,8.18304],[-8.0201701,8.182328],[-8.0198671,8.181959],[-8.0198801,8.181195],[-8.0195641,8.179825],[-8.0185001,8.180265],[-8.0175031,8.180564],[-8.0165721,8.181116],[-8.0140751,8.185039],[-8.0134771,8.186285],[-8.0131471,8.187179],[-8.0128131,8.187608],[-8.0121001,8.18756],[-8.0108861,8.187322],[-8.0104821,8.187036],[-8.0098871,8.186989],[-8.0092851,8.187474],[-8.0087761,8.188205],[-8.0085571,8.188291],[-8.0081921,8.188553],[-8.0081871,8.188768],[-8.0079251,8.188976],[-8.0075611,8.189686],[-8.0071131,8.18986],[-8.0069921,8.189991],[-8.0067511,8.189937],[-8.0061481,8.190483],[-8.0059491,8.190742],[-8.0057171,8.190816],[-8.0057001,8.191054],[-8.0055781,8.191104],[-8.0051521,8.190852],[-8.0044301,8.190603],[-8.0042221,8.190757],[-8.0037711,8.190838],[-8.0031151,8.190941],[-8.0027601,8.190886],[-8.0023381,8.191211],[-8.0025051,8.191466],[-8.0020221,8.191739],[-8.0018201,8.191671],[-8.0013341,8.191782],[-8.0010891,8.192004],[-8.0009141,8.19227],[-8.0006531,8.19298],[-8.0002251,8.193786],[-7.9995881,8.193817],[-7.9993331,8.194364],[-7.9992091,8.195221],[-7.9982101,8.196048],[-7.9975891,8.197073],[-7.9973431,8.197805],[-7.9968321,8.197903],[-7.9966391,8.197991],[-7.9964131,8.198269],[-7.9961711,8.19836],[-7.9957991,8.198254],[-7.9956264,8.1982909],[-7.9945691,8.198517],[-7.9940521,8.198397],[-7.9928131,8.197679],[-7.9920501,8.197299],[-7.9917971,8.196845],[-7.9912451,8.196874],[-7.9904161,8.197019],[-7.9889591,8.196876],[-7.9872451,8.197315],[-7.9868841,8.196881],[-7.9865031,8.196],[-7.9859151,8.195441],[-7.9851881,8.195373],[-7.9848171,8.195393],[-7.9846971,8.195046],[-7.9840451,8.194455],[-7.9837811,8.194049],[-7.9836941,8.193524],[-7.9832511,8.193148],[-7.9810261,8.19283],[-7.9821101,8.191138],[-7.9823741,8.190587],[-7.9825181,8.189265],[-7.9826731,8.188673],[-7.9835121,8.18803],[-7.9839511,8.187144],[-7.9836081,8.185987],[-7.9835061,8.185432],[-7.9851911,8.184579],[-7.9872031,8.184988],[-7.9876091,8.184364],[-7.9877151,8.183917],[-7.9876981,8.183101],[-7.9878891,8.183013],[-7.9883511,8.182491],[-7.9893001,8.181998],[-7.9907351,8.180565],[-7.9904901,8.180064],[-7.9904961,8.179615],[-7.9909251,8.179611],[-7.9911711,8.179493],[-7.9913111,8.179359],[-7.9913091,8.179135],[-7.9912401,8.179089],[-7.9907011,8.179149],[-7.9906671,8.178772],[-7.9903971,8.17829],[-7.9902571,8.177632],[-7.9902401,8.177014],[-7.9903491,8.176443],[-7.9914681,8.177167],[-7.9922181,8.177121],[-7.9922711,8.176896],[-7.9922271,8.176735],[-7.9922981,8.176519],[-7.9925621,8.176368],[-7.9927731,8.176328],[-7.9928341,8.176189],[-7.9931981,8.175926],[-7.9932431,8.175778],[-7.9931581,8.174784],[-7.9936481,8.173708],[-7.9937641,8.173167],[-7.9937481,8.172962],[-7.9936751,8.17267],[-7.9935481,8.172601],[-7.9930341,8.171825],[-7.9928651,8.171485],[-7.9926071,8.170434],[-7.9925591,8.169735],[-7.9926801,8.169267],[-7.9937621,8.168591],[-7.9941991,8.167753],[-7.9943401,8.167651],[-7.9944251,8.167269],[-7.9944731,8.166194],[-7.9950711,8.165576],[-7.9942321,8.164799],[-7.9942851,8.164444],[-7.9947261,8.163988],[-7.9951021,8.163319],[-7.9951331,8.162901],[-7.9953111,8.162691],[-7.9957051,8.162565],[-7.9959561,8.162367],[-7.9960191,8.162201],[-7.9959641,8.162005],[-7.9953671,8.161179],[-7.9954831,8.160793],[-7.9961661,8.16008],[-7.9962661,8.15986],[-7.9963951,8.159488],[-7.9962481,8.15896],[-7.9963501,8.158914],[-7.9966891,8.159094],[-7.9968591,8.158929],[-7.9969891,8.158668],[-7.9969851,8.158501],[-7.9972471,8.158184],[-7.9972931,8.1579],[-7.9971821,8.157655],[-7.9972971,8.157517],[-7.9972801,8.157437],[-7.9971681,8.157352],[-7.9971741,8.157229],[-7.9973141,8.157028],[-7.9973211,8.156694],[-7.9976331,8.156284],[-7.9976591,8.156027],[-7.9975721,8.155535],[-7.9972241,8.155358],[-7.9965801,8.154768],[-7.9962871,8.154759],[-7.9959941,8.154645],[-7.9959001,8.15425],[-7.9955021,8.15418],[-7.9951041,8.153985],[-7.9946571,8.153931],[-7.9946021,8.153376],[-7.9942461,8.152867],[-7.9943221,8.152031],[-7.9944391,8.151686],[-7.9946291,8.151434],[-7.9948251,8.151233],[-7.9953561,8.151301],[-7.9960951,8.150526],[-7.9965281,8.150185],[-7.9965651,8.150051],[-7.9966481,8.150021],[-7.9965901,8.149952],[-7.9966011,8.149786],[-7.9970571,8.149348],[-7.9970971,8.14916],[-7.9970771,8.148634],[-7.9969131,8.148392],[-7.9961721,8.148209],[-7.9958931,8.147605],[-7.9963171,8.147307],[-7.9963501,8.146935],[-7.9964651,8.146637],[-7.9962961,8.146548],[-7.9965841,8.146115],[-7.9972611,8.14479],[-7.9971501,8.144597],[-7.9966271,8.144174],[-7.9960101,8.143752],[-7.9959151,8.143571],[-7.9961011,8.14312],[-7.9963921,8.142701],[-7.9959791,8.142407],[-7.9958481,8.142143],[-7.9958191,8.141887],[-7.9961991,8.141427],[-7.9963151,8.140545],[-7.9959891,8.139884],[-7.9965141,8.138677],[-7.9966221,8.138309],[-7.9966751,8.137974],[-7.9965541,8.13775],[-7.9965411,8.137386],[-7.9967171,8.136732],[-7.9967111,8.13595],[-7.9965411,8.13542],[-7.9962091,8.135175],[-7.9959071,8.135087],[-7.9952761,8.134801],[-7.9951811,8.134467],[-7.9953431,8.133801],[-7.9950771,8.133733],[-7.9947981,8.133563],[-7.9946981,8.133113],[-7.9944721,8.132422],[-7.9940411,8.131821],[-7.9935971,8.131358],[-7.9930641,8.131062],[-7.9927411,8.130818],[-7.9929841,8.130009],[-7.9932591,8.129708],[-7.9934901,8.129608],[-7.9937511,8.129348],[-7.9938141,8.128765],[-7.9936371,8.128391],[-7.9926841,8.128068],[-7.9926541,8.127782],[-7.9930321,8.127554],[-7.9932741,8.127231],[-7.9933021,8.126706],[-7.9933831,8.126388],[-7.9936771,8.125997],[-7.9937971,8.125913],[-7.9938861,8.125695],[-7.9939111,8.125491],[-7.9940651,8.125339],[-7.9940551,8.12516],[-7.9943031,8.125111],[-7.9951501,8.124225],[-7.9953621,8.124083],[-7.9958681,8.123892],[-7.9961451,8.123912],[-7.9964321,8.124219],[-7.9968091,8.124298],[-7.9972321,8.124242],[-7.9976351,8.123842],[-7.9977461,8.123678],[-7.9977371,8.1235],[-7.9975021,8.123304],[-7.9975431,8.123055],[-7.9977561,8.122824],[-7.9979361,8.122705],[-7.9981331,8.122428],[-7.9982431,8.122123],[-7.9985171,8.121724],[-7.9987841,8.121581],[-7.9994181,8.121568],[-7.9995501,8.12125],[-7.9999191,8.121051],[-8.0003561,8.120974],[-8.0006991,8.121321],[-8.0010761,8.12138],[-8.0013331,8.121185],[-8.0020331,8.121225],[-8.0027921,8.12117],[-8.0029301,8.121212],[-8.0031951,8.122169],[-8.0038431,8.122216],[-8.0043051,8.122334],[-8.0048201,8.122163],[-8.0057191,8.121212],[-8.0067881,8.120987],[-8.0076211,8.120313],[-8.0081761,8.119587],[-8.0082551,8.118966],[-8.0082681,8.118411],[-8.0084921,8.117936],[-8.0089811,8.117157],[-8.0093241,8.116398],[-8.0097901,8.115556],[-8.0101521,8.114577],[-8.0100291,8.113749],[-8.0102841,8.112024],[-8.0106961,8.111494],[-8.0108831,8.110899],[-8.0119481,8.109991],[-8.0125741,8.109365],[-8.0129501,8.108301],[-8.0128251,8.107706],[-8.0122611,8.106641],[-8.0120731,8.10589],[-8.0121051,8.10445],[-8.0129501,8.103135],[-8.0129811,8.102008],[-8.0123861,8.101037],[-8.0119811,8.10145],[-8.0110711,8.101162],[-8.0096541,8.101268],[-8.0077541,8.099265],[-8.0073341,8.098895],[-8.0072571,8.097768],[-8.0071571,8.097033],[-8.0067771,8.096057],[-8.0060621,8.096215],[-8.0045591,8.096434],[-8.0034161,8.096685],[-8.0024621,8.095811],[-8.0017431,8.095274],[-8.0015371,8.09485],[-8.0011901,8.095009],[-7.9978741,8.097943],[-7.9978401,8.098253],[-7.9975021,8.098629],[-7.9968351,8.098847],[-7.9965411,8.098628],[-7.9961551,8.098123],[-7.9960041,8.097821],[-7.9953461,8.098071],[-7.9952231,8.098584],[-7.9949851,8.098731],[-7.9947581,8.09852],[-7.9946831,8.098317],[-7.9945011,8.09809],[-7.9942061,8.097899],[-7.9938511,8.098135],[-7.9934051,8.098127],[-7.9930321,8.096565],[-7.9929041,8.096444],[-7.9928061,8.096137],[-7.9923101,8.095872],[-7.9924611,8.095458],[-7.9923991,8.095308],[-7.9915981,8.094891],[-7.9909101,8.09478],[-7.9903681,8.094866],[-7.9892231,8.094889],[-7.9885901,8.094993],[-7.9878951,8.094841],[-7.9876331,8.094441],[-7.9877601,8.093935],[-7.9878011,8.093436],[-7.9878321,8.092747],[-7.9877471,8.092302],[-7.9870951,8.091329],[-7.9855251,8.090446],[-7.9846301,8.090415],[-7.9839511,8.090207],[-7.9835761,8.090146],[-7.9830411,8.090388],[-7.9827601,8.090851],[-7.9820521,8.090971],[-7.9816621,8.09027],[-7.9809631,8.089917],[-7.9803821,8.089935],[-7.9799611,8.090175],[-7.9795621,8.090168],[-7.9792281,8.089997],[-7.9789051,8.089751],[-7.9788511,8.089502],[-7.9786381,8.089402],[-7.9783691,8.08954],[-7.9779091,8.089937],[-7.9774631,8.090008],[-7.9772861,8.089773],[-7.9766651,8.090011],[-7.9756621,8.090208],[-7.9754791,8.089495],[-7.9755671,8.088985],[-7.9756901,8.088648],[-7.9759241,8.08835],[-7.9758301,8.088041],[-7.9751351,8.087775],[-7.9740811,8.087926],[-7.9740061,8.087792],[-7.9743661,8.087267],[-7.9743801,8.087071],[-7.9746121,8.086641],[-7.9745591,8.086064],[-7.9744831,8.085962],[-7.9739331,8.085976],[-7.9739551,8.084962],[-7.9740041,8.084732],[-7.9752981,8.084326],[-7.9754281,8.084198],[-7.9752681,8.083881],[-7.9752641,8.083713],[-7.9753811,8.083487],[-7.9752561,8.083339],[-7.9736461,8.084044],[-7.9731031,8.083773],[-7.9732301,8.083678],[-7.9734851,8.083592],[-7.9734871,8.082534],[-7.9733671,8.082282],[-7.9729871,8.081761],[-7.9727761,8.081742],[-7.9719851,8.0818],[-7.9716151,8.081571],[-7.9715971,8.081233],[-7.9718331,8.080821],[-7.9717321,8.079941],[-7.9715551,8.079762],[-7.9709681,8.079502],[-7.9703241,8.078824],[-7.9705691,8.07717],[-7.9726461,8.077228],[-7.9726851,8.076623],[-7.9727541,8.075269],[-7.9722451,8.074654],[-7.9722961,8.073583],[-7.9718781,8.073145],[-7.9710461,8.072575],[-7.9708221,8.072614],[-7.9706781,8.072705],[-7.9705891,8.072418],[-7.9706481,8.07221],[-7.9705991,8.071972],[-7.9706681,8.071754],[-7.9710341,8.071279],[-7.9710201,8.071029],[-7.9711781,8.070725],[-7.9709671,8.070607],[-7.9707951,8.070593],[-7.9707551,8.070356],[-7.9708741,8.070197],[-7.9708351,8.069946],[-7.9706631,8.06984],[-7.9705041,8.069986],[-7.9702931,8.069893],[-7.9695061,8.069892],[-7.9692491,8.069665],[-7.9689051,8.069552],[-7.9680231,8.069474],[-7.9678871,8.069074],[-7.9684291,8.068586],[-7.9686331,8.068153],[-7.9686531,8.067978],[-7.9684781,8.067664],[-7.9679271,8.06695],[-7.9677851,8.066673],[-7.9673131,8.066208],[-7.9669801,8.065943],[-7.9667901,8.065989],[-7.9646941,8.069086],[-7.9644621,8.068485],[-7.9637071,8.067511],[-7.9642301,8.067164],[-7.9652731,8.064897],[-7.9651161,8.064315],[-7.9647531,8.063539],[-7.9640531,8.063172],[-7.9646551,8.062069],[-7.9645651,8.06157],[-7.9646141,8.061263],[-7.9648431,8.061042],[-7.9649191,8.060787],[-7.9647511,8.060404],[-7.9647771,8.0599],[-7.9647251,8.059593],[-7.9643941,8.059451],[-7.9634831,8.058551],[-7.9625651,8.058417],[-7.9622401,8.057622],[-7.9624541,8.05734],[-7.9623631,8.057205],[-7.9621381,8.057143],[-7.9618201,8.057173],[-7.9615681,8.057148],[-7.9615591,8.056865],[-7.9616251,8.0565],[-7.9619771,8.056199],[-7.9619881,8.055837],[-7.9619751,8.055344],[-7.9617811,8.054874],[-7.9615671,8.054518],[-7.9617001,8.054314],[-7.9622061,8.053761],[-7.9622571,8.053604],[-7.9620681,8.053279],[-7.9616431,8.053457],[-7.9612011,8.053399],[-7.9609491,8.053242],[-7.9607791,8.053207],[-7.9604551,8.052856],[-7.9603711,8.052954],[-7.9602151,8.05293],[-7.9598301,8.052556],[-7.9595041,8.052412],[-7.9593591,8.052195],[-7.9595181,8.051978],[-7.9595051,8.051786],[-7.9593491,8.051582],[-7.9593851,8.051401],[-7.9592771,8.051173],[-7.9589881,8.050968],[-7.9583871,8.050884],[-7.9580511,8.051004],[-7.9579051,8.050967],[-7.9578221,8.051233],[-7.9576781,8.051149],[-7.9571581,8.051208],[-7.9571831,8.051413],[-7.9569551,8.05175],[-7.9567051,8.052075],[-7.9559461,8.052808],[-7.9559951,8.053217],[-7.9558621,8.053361],[-7.9557421,8.053998],[-7.9555141,8.054143],[-7.9548521,8.054431],[-7.9545831,8.054458],[-7.9543461,8.054419],[-7.9541531,8.054312],[-7.9541401,8.053684],[-7.9545281,8.053746],[-7.9546481,8.05371],[-7.9546831,8.053565],[-7.9546231,8.053434],[-7.9545401,8.053435],[-7.9542871,8.053265],[-7.9540951,8.053373],[-7.9539751,8.053337],[-7.9538421,8.053193],[-7.9535281,8.053521],[-7.9533481,8.053375],[-7.9533121,8.05317],[-7.9528011,8.052917],[-7.9527791,8.05276],[-7.9531201,8.052653],[-7.9530841,8.052546],[-7.9528691,8.052305],[-7.9524001,8.052208],[-7.9522181,8.052125],[-7.9519771,8.052199],[-7.9517341,8.051945],[-7.9518081,8.051583],[-7.9517381,8.051437],[-7.9515161,8.051571],[-7.9515731,8.052388],[-7.9513191,8.052435],[-7.9510801,8.052221],[-7.9512211,8.051752],[-7.9512451,8.051377],[-7.9510141,8.051499],[-7.9508511,8.051824],[-7.9504331,8.051732],[-7.9504141,8.051897],[-7.9502401,8.052035],[-7.9498721,8.051684],[-7.9497411,8.051799],[-7.9495931,8.051766],[-7.9492161,8.051782],[-7.9490841,8.051897],[-7.9490231,8.05185],[-7.9488471,8.051917],[-7.9487501,8.051837],[-7.9487481,8.051679],[-7.9485261,8.051113],[-7.9486301,8.050837],[-7.9483901,8.050764],[-7.9484471,8.050152],[-7.9483461,8.050207],[-7.9479691,8.05024],[-7.9473651,8.05042],[-7.9469561,8.050079],[-7.9470431,8.050086],[-7.9468711,8.049752],[-7.9462581,8.049393],[-7.9459031,8.049315],[-7.9453601,8.049108],[-7.9444771,8.04922],[-7.9440951,8.049117],[-7.9436171,8.048829],[-7.9435241,8.048513],[-7.9438221,8.048503],[-7.9440311,8.048402],[-7.9441551,8.048183],[-7.9441161,8.04797],[-7.9437201,8.047786],[-7.9438091,8.047418],[-7.9438661,8.046433],[-7.9442801,8.045098],[-7.9446551,8.044366],[-7.9450811,8.043742],[-7.9472301,8.042676],[-7.9476901,8.042184],[-7.9481001,8.041954],[-7.9485271,8.041888],[-7.9484901,8.041501],[-7.9487131,8.040949],[-7.9487681,8.040682],[-7.9489041,8.040477],[-7.9489771,8.039977],[-7.9489791,8.039614],[-7.9488431,8.03919],[-7.9490031,8.038996],[-7.9492491,8.038902],[-7.9495141,8.038371],[-7.9493551,8.038031],[-7.9495341,8.037891],[-7.9494311,8.03772],[-7.9489081,8.037656],[-7.9485391,8.037461],[-7.9485621,8.037262],[-7.9487501,8.036859],[-7.9486641,8.036709],[-7.9485181,8.036674],[-7.9480991,8.037026],[-7.9481901,8.037343],[-7.9478511,8.037242],[-7.9477911,8.036976],[-7.9473701,8.0369],[-7.9472721,8.037151],[-7.9471201,8.037204],[-7.9469701,8.037015],[-7.9468481,8.036725],[-7.9469661,8.036355],[-7.9470331,8.036393],[-7.9472981,8.035847],[-7.9476511,8.035836],[-7.9477331,8.036042],[-7.9480251,8.035897],[-7.9482001,8.035576],[-7.9477051,8.035164],[-7.9476021,8.034836],[-7.9478411,8.034789],[-7.9482121,8.034865],[-7.9484301,8.034848],[-7.9484941,8.034403],[-7.9486391,8.034329],[-7.9489881,8.034255],[-7.9488911,8.033758],[-7.9490631,8.033463],[-7.9497171,8.033437],[-7.9498851,8.033291],[-7.9500231,8.033083],[-7.9500511,8.032826],[-7.9500171,8.03267],[-7.9496551,8.032202],[-7.9489991,8.031878],[-7.9490241,8.031709],[-7.9493541,8.031731],[-7.9496851,8.031427],[-7.9494251,8.031171],[-7.9491511,8.030992],[-7.9482301,8.031249],[-7.9480581,8.031164],[-7.9480071,8.030989],[-7.9481391,8.030284],[-7.9483771,8.030003],[-7.9483901,8.029204],[-7.9481821,8.029146],[-7.9479051,8.02939],[-7.9476621,8.029282],[-7.9475551,8.028975],[-7.9475261,8.028589],[-7.9465131,8.028043],[-7.9465241,8.0275],[-7.9467731,8.025801],[-7.9473141,8.025211],[-7.9473241,8.024882],[-7.9471801,8.024703],[-7.9468661,8.024549],[-7.9464751,8.024541],[-7.9462501,8.024351],[-7.9460921,8.023679],[-7.9458761,8.023329],[-7.9446161,8.022742],[-7.9441721,8.02262],[-7.9441699,8.0221179],[-7.9446021,8.022203],[-7.9451033,8.0219069],[-7.945215,8.0212209],[-7.9449785,8.0198495],[-7.9430153,8.017109],[-7.9453732,8.0134291],[-7.9456247,8.0125362],[-7.9460573,8.0119387],[-7.9469866,8.0116529],[-7.9478019,8.0120583],[-7.9492781,8.0132609],[-7.9499692,8.0138589],[-7.9505329,8.0148091],[-7.9507946,8.0150815],[-7.9517541,8.0154536],[-7.9528009,8.0161247],[-7.953284,8.0161978],[-7.9538342,8.0160184],[-7.9548206,8.016138],[-7.9553708,8.0165632],[-7.9566256,8.0184569],[-7.9571489,8.0196529],[-7.9573234,8.0207293],[-7.957679,8.0211678],[-7.9582628,8.0212874],[-7.9587929,8.0210947],[-7.9595243,8.0200382],[-7.9603026,8.019706],[-7.9614635,8.0196994],[-7.9625773,8.0198123],[-7.964181,8.0203771],[-7.9655834,8.0210681],[-7.9666973,8.0219518],[-7.9675696,8.0227491],[-7.9682272,8.0237059],[-7.968925,8.0240249],[-7.9696161,8.0240182],[-7.9718103,8.0231345],[-7.9729711,8.0222774],[-7.9746822,8.0207492],[-7.9759437,8.0196794],[-7.9774669,8.018716],[-7.9783459,8.0183572],[-7.9789296,8.0179453],[-7.9794731,8.0173539],[-7.9802582,8.0170084],[-7.9808151,8.0170615],[-7.9812043,8.0174004],[-7.9818082,8.0187957],[-7.9819357,8.0194402],[-7.9825061,8.0201113],[-7.9826134,8.0206894],[-7.9824524,8.0217591],[-7.9818947,8.0229291],[-7.9818518,8.0231877],[-7.981932,8.0236127],[-7.9825564,8.0245764],[-7.9831335,8.024882],[-7.983979,8.0249618],[-7.9847439,8.0248488],[-7.9854552,8.0245432],[-7.9858511,8.0240382],[-7.9864081,8.023779],[-7.9869717,8.0238721],[-7.9874146,8.024005],[-7.9876226,8.0242707],[-7.9879044,8.0250216],[-7.9883809,8.0260847],[-7.9887231,8.0268621],[-7.9887566,8.0272408],[-7.9885351,8.027762],[-7.9879491,8.028236],[-7.9873181,8.028779],[-7.9868811,8.029449],[-7.9864041,8.030056],[-7.9852471,8.031062],[-7.9842671,8.032894],[-7.9842201,8.03366],[-7.9841311,8.033866],[-7.9831041,8.034507],[-7.9822711,8.034833],[-7.9822011,8.034998],[-7.9823731,8.035285],[-7.9828011,8.035726],[-7.9827351,8.036139],[-7.9828871,8.036321],[-7.9832041,8.036394],[-7.9835361,8.036567],[-7.9836891,8.036768],[-7.9838911,8.037936],[-7.9842561,8.038156],[-7.9849001,8.038318],[-7.9852571,8.038551],[-7.9862891,8.039433],[-7.9879511,8.040367],[-7.9888251,8.041342],[-7.9890881,8.041989],[-7.9899391,8.042639],[-7.9912601,8.043399],[-7.9920011,8.04326],[-7.9926181,8.042882],[-7.9938181,8.042744],[-7.9941451,8.04296],[-7.9945251,8.043403],[-7.9947501,8.044007],[-7.9947301,8.044864],[-7.9947871,8.045734],[-7.9944731,8.046783],[-7.9946231,8.047124],[-7.9950831,8.047746],[-7.9956701,8.048232],[-7.9966971,8.04856],[-7.9978231,8.048231],[-7.9982741,8.047828],[-7.9984251,8.046219],[-7.9989081,8.045116],[-7.9994151,8.044164],[-8.0006781,8.042983],[-8.0010131,8.042812],[-8.0024581,8.042607],[-8.0031691,8.042461],[-8.0035501,8.042749],[-8.0042081,8.043793],[-8.0046011,8.044108],[-8.0051451,8.04423],[-8.0057281,8.044185],[-8.0062191,8.04402],[-8.0066711,8.043692],[-8.0070671,8.043673],[-8.0075741,8.043931],[-8.0079571,8.044196],[-8.0083931,8.044205],[-8.0089731,8.044048],[-8.0097531,8.043486],[-8.0100941,8.042929],[-8.0103531,8.042105],[-8.0102291,8.041283],[-8.0098621,8.040224],[-8.0096941,8.03953],[-8.0096751,8.038931],[-8.0097881,8.037651],[-8.0094771,8.037265],[-8.0077271,8.036439],[-8.0066161,8.036408],[-8.0061201,8.036046],[-8.0061061,8.035403],[-8.0066401,8.034776],[-8.0075581,8.034214],[-8.0095891,8.033743],[-8.0117561,8.034231],[-8.0122531,8.03459],[-8.0125191,8.03516],[-8.0125351,8.035797],[-8.0128191,8.036333],[-8.0135851,8.036637],[-8.0150041,8.037105],[-8.0156171,8.037022],[-8.0163061,8.036704],[-8.0169841,8.036581],[-8.0186041,8.036471],[-8.0202821,8.036506],[-8.0209311,8.036327],[-8.0212131,8.03596],[-8.0215011,8.035479],[-8.0217831,8.035285],[-8.0222821,8.035187],[-8.0231401,8.035292],[-8.0234451,8.035232],[-8.0237711,8.035285],[-8.0240521,8.035392],[-8.0244101,8.03643],[-8.0249761,8.036874],[-8.0260161,8.037208],[-8.0266741,8.037102],[-8.0270751,8.037114],[-8.0273001,8.037416],[-8.0276251,8.038284],[-8.0282371,8.038925],[-8.0294431,8.039401],[-8.0310511,8.039689],[-8.0320181,8.039808],[-8.0328081,8.039485],[-8.0332841,8.038961],[-8.0333551,8.038319],[-8.0335001,8.037896],[-8.0337301,8.037767],[-8.0341961,8.037783],[-8.0346821,8.038175],[-8.0356851,8.039358],[-8.0371851,8.040617],[-8.0384031,8.041311],[-8.0388291,8.041321],[-8.0390861,8.04128],[-8.0392891,8.041439],[-8.0398591,8.04238],[-8.0400371,8.042925],[-8.0400181,8.043744],[-8.0402321,8.044571],[-8.0406891,8.04526],[-8.0412201,8.045613],[-8.0425871,8.045802],[-8.0437621,8.046026],[-8.0451101,8.046107],[-8.0458171,8.046047],[-8.0464661,8.04607],[-8.0469331,8.046171],[-8.0476351,8.046488],[-8.0486201,8.046533],[-8.0502241,8.046181],[-8.0508551,8.045754],[-8.0514031,8.045209],[-8.0517271,8.045005],[-8.0520231,8.044709],[-8.0519761,8.044385],[-8.0521611,8.044096],[-8.0530191,8.043697],[-8.0535131,8.043178],[-8.0538051,8.042651],[-8.0539621,8.04159],[-8.0539841,8.041157],[-8.0546401,8.040294],[-8.0557381,8.039688],[-8.0579781,8.03905],[-8.0590831,8.039022],[-8.0604321,8.039234],[-8.0607031,8.039321],[-8.0608231,8.038665],[-8.0610371,8.038169],[-8.0613851,8.037902],[-8.0618261,8.037447],[-8.0621471,8.036965],[-8.0622681,8.036496],[-8.0620941,8.035546],[-8.0618931,8.035104],[-8.0616251,8.034756],[-8.0616251,8.034301],[-8.0619871,8.033886],[-8.0621881,8.033472],[-8.0621881,8.033137],[-8.0624151,8.032709],[-8.0626561,8.032441],[-8.0628301,8.031932],[-8.0627231,8.031624],[-8.0623081,8.031236],[-8.0620811,8.030808],[-8.0621611,8.03046],[-8.0625101,8.030257],[-8.0626701,8.030364],[-8.0628571,8.030337],[-8.0629781,8.030043],[-8.0628571,8.029534],[-8.0628571,8.028972],[-8.0627771,8.028718],[-8.0629651,8.028477],[-8.0631391,8.02845],[-8.0633121,8.028664],[-8.0635541,8.028731],[-8.0639371,8.028447],[-8.0647991,8.028414],[-8.0653001,8.028744],[-8.0658551,8.028905],[-8.0661371,8.028758],[-8.0661641,8.028423],[-8.0659361,8.028048],[-8.0661101,8.027834],[-8.0662441,8.027419],[-8.0662711,8.027085],[-8.0664851,8.026924],[-8.0665921,8.02671],[-8.0665921,8.026456],[-8.0668731,8.026295],[-8.0672481,8.026201],[-8.0675551,8.026001],[-8.0675961,8.025733],[-8.0674481,8.025639],[-8.0672211,8.025586],[-8.0670871,8.025465],[-8.0672341,8.02505],[-8.0666591,8.023872],[-8.0664441,8.023658],[-8.0666071,8.023219],[-8.0672781,8.022785],[-8.0678201,8.021901],[-8.0678231,8.021423],[-8.0677681,8.02099],[-8.0679921,8.020328],[-8.0675251,8.019598],[-8.0678981,8.019419],[-8.0679421,8.018593],[-8.0678111,8.018506],[-8.0673871,8.018617],[-8.0672631,8.018551],[-8.0671461,8.018287],[-8.0673001,8.017989],[-8.0666081,8.016829],[-8.0667951,8.016306],[-8.0671691,8.016137],[-8.0668701,8.015146],[-8.0669261,8.014641],[-8.0667581,8.014117],[-8.0669641,8.013836],[-8.0670381,8.013406],[-8.0664401,8.012545],[-8.0665701,8.011909],[-8.0670381,8.011423],[-8.0671151,8.010126],[-8.0668991,8.009169],[-8.0672051,8.008002],[-8.0668961,8.007474],[-8.0670811,8.005739],[-8.0676291,8.004862],[-8.0678321,8.004013],[-8.0680131,8.003679],[-8.0679361,8.003073],[-8.0677701,8.002698],[-8.0682761,8.001806],[-8.0691541,8.001475],[-8.0695051,8.001494],[-8.0702791,8.000724],[-8.0751321,8.000393],[-8.0755421,8.000537],[-8.0756991,8.000688],[-8.0764601,8.001149],[-8.0770081,8.001119],[-8.0774231,8.000716],[-8.0780531,8.000437],[-8.0784901,7.999493],[-8.0786391,7.998842],[-8.0783631,7.998569],[-8.0786551,7.998176],[-8.0789841,7.997922],[-8.0791871,7.997624],[-8.0788821,7.997414],[-8.0789371,7.997238],[-8.0791191,7.997228],[-8.0797501,7.996982],[-8.0797747,7.9969668],[-8.0800741,7.996781],[-8.0804441,7.996689],[-8.0805521,7.996427],[-8.0805211,7.995995],[-8.0807361,7.99561],[-8.0809681,7.995425],[-8.0809831,7.995132],[-8.0808601,7.994593],[-8.0810291,7.994316],[-8.0802861,7.993415],[-8.0802061,7.992556],[-8.0806861,7.992096],[-8.0807361,7.991394],[-8.0804901,7.990771],[-8.0805361,7.98893],[-8.0812031,7.98842],[-8.0821261,7.987488],[-8.0825061,7.987305],[-8.0827351,7.986913],[-8.0828501,7.986865],[-8.0829221,7.986744],[-8.0829571,7.986387],[-8.0830621,7.986275],[-8.0830931,7.98616],[-8.0830641,7.985924],[-8.0831961,7.985862],[-8.0832191,7.985798],[-8.0833221,7.985826],[-8.0834761,7.985777],[-8.0840321,7.985471],[-8.0841421,7.985296],[-8.0840061,7.98478],[-8.0840501,7.984407],[-8.0841921,7.984164],[-8.0845791,7.983873],[-8.0851491,7.983884],[-8.0853931,7.983509],[-8.0856571,7.982945],[-8.0852991,7.982583],[-8.0852981,7.982336],[-8.0857231,7.982082],[-8.0857391,7.981346],[-8.0860971,7.980953],[-8.0864671,7.980891],[-8.0866521,7.98048],[-8.0870211,7.980028],[-8.0873091,7.979535],[-8.0877401,7.979083],[-8.0882741,7.979062],[-8.0885621,7.978939],[-8.0888091,7.978631],[-8.0892801,7.978434],[-8.0895991,7.977999],[-8.0907281,7.977499],[-8.0912841,7.976572],[-8.0917711,7.973428],[-8.0921041,7.97251],[-8.0926571,7.971442],[-8.0927491,7.970615],[-8.0926271,7.969831],[-8.0928141,7.969267],[-8.0932741,7.968468],[-8.0932881,7.96758],[-8.0938301,7.966043],[-8.0947731,7.965193],[-8.0940571,7.964025],[-8.0937351,7.963222],[-8.0934031,7.961622],[-8.0933541,7.961176],[-8.0933671,7.959777],[-8.0934321,7.959154],[-8.0930121,7.958123],[-8.0925501,7.957768],[-8.0926781,7.956983],[-8.0930941,7.955485],[-8.0937561,7.953722],[-8.0938319,7.9525562],[-8.0938521,7.952246],[-8.0944511,7.951176],[-8.0948791,7.950147],[-8.0954251,7.949521],[-8.0964171,7.948669],[-8.0972371,7.948155],[-8.0988851,7.947558],[-8.0994601,7.946103],[-8.0996351,7.945993],[-8.0999721,7.945017],[-8.1003051,7.944533],[-8.1009741,7.944158],[-8.1045601,7.9414],[-8.1047871,7.940943],[-8.1059971,7.93995],[-8.1065841,7.93769],[-8.1059771,7.935986],[-8.1059971,7.935598],[-8.1059101,7.935302],[-8.1058601,7.934793],[-8.1059631,7.934311],[-8.1063501,7.933929],[-8.1065191,7.933304],[-8.1065741,7.932894],[-8.1067831,7.932689],[-8.1070391,7.932547],[-8.1073091,7.932308],[-8.1074161,7.932331],[-8.1073881,7.932017],[-8.1075381,7.932025],[-8.1076261,7.932077],[-8.1078991,7.932037],[-8.1078691,7.931893],[-8.1080331,7.931822],[-8.1080261,7.931661],[-8.1081311,7.931656],[-8.1081071,7.931489],[-8.1083341,7.931455],[-8.1084341,7.931343],[-8.1085841,7.931315],[-8.1087301,7.931342],[-8.1087961,7.931058],[-8.1089101,7.931093],[-8.1091061,7.931029],[-8.1091641,7.930867],[-8.1093391,7.930722],[-8.1093541,7.930502],[-8.1094641,7.930327],[-8.1096001,7.930228],[-8.1097961,7.930184],[-8.1099141,7.930217],[-8.1100301,7.930128],[-8.1101531,7.930176],[-8.1102511,7.930073],[-8.1110241,7.929745],[-8.1124721,7.928408],[-8.1126251,7.928188],[-8.1131011,7.927677],[-8.1132831,7.927433],[-8.1132651,7.927187],[-8.1134621,7.927181],[-8.1134731,7.927124],[-8.1133731,7.92701],[-8.1135931,7.926902],[-8.1139901,7.926578],[-8.1142991,7.926248],[-8.1144321,7.925778],[-8.1142751,7.925444],[-8.1141701,7.925042],[-8.1140321,7.92419],[-8.1141131,7.923489],[-8.1135371,7.921851],[-8.1117711,7.9199399],[-8.1113471,7.919481],[-8.1116391,7.917623],[-8.1126311,7.91602],[-8.1143331,7.914373],[-8.1159291,7.915473],[-8.1165241,7.915327],[-8.1167911,7.915007],[-8.1169771,7.914568],[-8.1170471,7.91399],[-8.1178351,7.913185],[-8.1178351,7.912502],[-8.1173271,7.911977],[-8.1171171,7.911539],[-8.1169421,7.910349],[-8.1172751,7.910086],[-8.1177631,7.910002],[-8.1180121,7.909463],[-8.1176461,7.908501],[-8.1165601,7.907803],[-8.1161861,7.906807],[-8.1164351,7.905479],[-8.1165551,7.904269],[-8.1164591,7.904031],[-8.1151901,7.903238],[-8.1149831,7.901661],[-8.1163441,7.899746],[-8.1175141,7.898465],[-8.1182201,7.897469],[-8.1181371,7.896681],[-8.1181911,7.89549],[-8.1189381,7.894619],[-8.1201831,7.893342],[-8.1217461,7.892815],[-8.1228291,7.89216],[-8.1235131,7.891319],[-8.1238561,7.890728],[-8.1240431,7.889639],[-8.1348471,7.88311],[-8.1344731,7.860303],[-8.1257331,7.847896],[-8.1246021,7.834988],[-8.1176381,7.836729],[-8.1112921,7.837528],[-8.1112541,7.836627],[-8.1079831,7.817084],[-8.1075011,7.814731],[-8.1060323,7.8118535],[-8.1056423,7.8110893],[-8.1054431,7.810699],[-8.1049711,7.810024],[-8.1039841,7.808924],[-8.1019121,7.808267],[-8.1011371,7.807369],[-8.1002431,7.807215],[-8.0975061,7.804761],[-8.0912561,7.797761],[-8.0929951,7.797413],[-8.0942102,7.7974345],[-8.0943521,7.797437],[-8.0946711,7.7974067],[-8.0953511,7.797342],[-8.0959491,7.796731],[-8.0961171,7.795713],[-8.0960651,7.794962],[-8.0961601,7.793892],[-8.0974411,7.791576],[-8.0997601,7.792106],[-8.1002291,7.791726],[-8.1011811,7.790441],[-8.1012324,7.7903451],[-8.1020851,7.788752],[-8.1022991,7.787396],[-8.1024421,7.786039],[-8.1028231,7.784421],[-8.1035841,7.783065],[-8.1044881,7.781614],[-8.1045601,7.780043],[-8.1037031,7.777973],[-8.1024891,7.774689],[-8.1015081,7.773231],[-8.1015901,7.772652],[-8.1015951,7.772108],[-8.1018751,7.771192],[-8.1026901,7.770958],[-8.1021321,7.77042],[-8.1016441,7.770065],[-8.1009561,7.76983],[-8.1006071,7.76953],[-8.1005741,7.768588],[-8.1008771,7.767596],[-8.1009501,7.766947],[-8.1014251,7.765817],[-8.1018321,7.765502],[-8.1026601,7.765169],[-8.1033931,7.764671],[-8.1046121,7.76414],[-8.1049561,7.763565],[-8.1058451,7.763197],[-8.1060971,7.762807],[-8.1059701,7.761955],[-8.1056171,7.761208],[-8.1060421,7.760065],[-8.1056531,7.759],[-8.1055531,7.758168],[-8.1054751,7.757779],[-8.1053881,7.757643],[-8.1063921,7.756391],[-8.1066871,7.755914],[-8.1063891,7.755538],[-8.1060161,7.754933],[-8.1056591,7.754212],[-8.1051111,7.753685],[-8.1056981,7.753039],[-8.1132607,7.7390607],[-8.1155881,7.734759],[-8.1158261,7.734021],[-8.1157311,7.73326],[-8.1157491,7.731133],[-8.1161881,7.729168],[-8.1171671,7.728147],[-8.1175231,7.727241],[-8.1176111,7.726431],[-8.1179201,7.725764],[-8.1178971,7.725288],[-8.1177471,7.724992],[-8.1174101,7.724782],[-8.1171901,7.724542],[-8.1164911,7.723346],[-8.1171141,7.722787],[-8.1176451,7.722004],[-8.1181211,7.721409],[-8.1188071,7.720791],[-8.1189741,7.720322],[-8.1201311,7.71877],[-8.1219291,7.717865],[-8.1227081,7.717125],[-8.1235681,7.716698],[-8.1241151,7.715437],[-8.1253521,7.714557],[-8.1265421,7.712677],[-8.1290881,7.709777],[-8.1302971,7.708007],[-8.1310271,7.706185],[-8.1326791,7.704556],[-8.1338231,7.703207],[-8.1347461,7.70174],[-8.1359491,7.699424],[-8.1357851,7.696345],[-8.1358231,7.695563],[-8.1362001,7.695261],[-8.1367711,7.694666],[-8.1369851,7.694095],[-8.1367101,7.693705],[-8.1365811,7.692715],[-8.1367711,7.69193],[-8.1372951,7.691192],[-8.1394361,7.68955],[-8.1402211,7.688622],[-8.1403641,7.687647],[-8.1411731,7.686386],[-8.1422121,7.6867],[-8.1427951,7.686724],[-8.1437171,7.686943],[-8.1441781,7.686846],[-8.1445911,7.685729],[-8.1453681,7.683034],[-8.1456841,7.682112],[-8.1453691,7.681649],[-8.1454151,7.679768],[-8.1459501,7.678322],[-8.1463251,7.677805],[-8.1470921,7.676359],[-8.1472671,7.675711],[-8.1479421,7.674881],[-8.1480851,7.673071],[-8.1477361,7.671965],[-8.1474481,7.671512],[-8.1472994,7.6703898],[-8.1462635,7.669251],[-8.14535,7.6680558],[-8.1448067,7.6675064],[-8.1439211,7.666196],[-8.1434581,7.664948],[-8.1433608,7.6635796],[-8.143036,7.6627235],[-8.1429899,7.6618227],[-8.1436011,7.659741],[-8.1445911,7.657397],[-8.1462181,7.655771],[-8.1480871,7.655989],[-8.1502721,7.656815],[-8.1516571,7.657388],[-8.1533801,7.656665],[-8.1545391,7.655889],[-8.1555061,7.655406],[-8.1561661,7.654589],[-8.1564891,7.654105],[-8.1565471,7.653938],[-8.1567321,7.653731],[-8.1574611,7.653145],[-8.1580551,7.652794],[-8.1591341,7.651618],[-8.1607441,7.650482],[-8.1620231,7.649771],[-8.1635391,7.649487],[-8.1718151,7.640255],[-8.1706221,7.638955],[-8.1688671,7.635233],[-8.1699601,7.632284],[-8.1703701,7.630946],[-8.1703231,7.629837],[-8.1700031,7.629266],[-8.1708821,7.626544],[-8.1833211,7.610809],[-8.1849131,7.608218],[-8.1834491,7.605789],[-8.1814531,7.604289],[-8.1809151,7.603627],[-8.1791741,7.601851],[-8.1790851,7.60084],[-8.1780401,7.598964],[-8.1771801,7.597542],[-8.1759771,7.593851],[-8.1741411,7.591828],[-8.1723691,7.58861],[-8.1715331,7.586025],[-8.1711151,7.585092],[-8.1704111,7.584276],[-8.1734191,7.580547],[-8.1772071,7.575632],[-8.1796201,7.572071],[-8.1808871,7.570069],[-8.1815651,7.56855],[-8.1818071,7.56753],[-8.1818161,7.566377],[-8.1823501,7.565256],[-8.1826491,7.563559],[-8.1831951,7.561416],[-8.1848061,7.56044],[-8.1853361,7.560339],[-8.1861431,7.560234],[-8.1870201,7.560862],[-8.1875891,7.560735],[-8.1879891,7.55985],[-8.1897881,7.558366],[-8.1895171,7.557103],[-8.1903231,7.55638],[-8.1909571,7.555398],[-8.1920811,7.55429],[-8.1927551,7.553851],[-8.1931201,7.553311],[-8.1941641,7.552864],[-8.1949571,7.553095],[-8.1957301,7.552769],[-8.1967781,7.552728],[-8.1982471,7.553256],[-8.1989401,7.553165],[-8.1997211,7.552641],[-8.2001691,7.552036],[-8.2010221,7.550215],[-8.2027991,7.550262],[-8.2043591,7.549587],[-8.2050701,7.548761],[-8.2051401,7.546642],[-8.2054291,7.545162],[-8.2063341,7.542307],[-8.2072411,7.540364],[-8.2100931,7.536841],[-8.2187131,7.538724],[-8.2270071,7.549912],[-8.2292111,7.552144],[-8.2591881,7.572968],[-8.2602911,7.573656],[-8.2979811,7.58501],[-8.3079221,7.612193],[-8.3085081,7.611932],[-8.3088521,7.611677],[-8.3096311,7.611254],[-8.3100961,7.61105],[-8.3104061,7.610837],[-8.3109881,7.611184],[-8.3114021,7.611264],[-8.3114921,7.611236],[-8.3118991,7.610814],[-8.3122491,7.610693],[-8.3123391,7.610569],[-8.3122951,7.610382],[-8.3124131,7.610253],[-8.3130681,7.609906],[-8.3145211,7.608279],[-8.3149551,7.607978],[-8.3153981,7.608049],[-8.3160491,7.607768],[-8.3164671,7.60773],[-8.3182411,7.607707],[-8.3182971,7.606636],[-8.3184111,7.606489],[-8.3186281,7.606534],[-8.3188551,7.606755],[-8.3195121,7.60694],[-8.3195011,7.607059],[-8.3196441,7.607152],[-8.3197931,7.607411],[-8.3200891,7.608112],[-8.3204271,7.608246],[-8.3210041,7.607706],[-8.3216711,7.607962],[-8.3233261,7.608312],[-8.3240591,7.60864],[-8.3250621,7.608755],[-8.3257961,7.608577],[-8.3265511,7.608225],[-8.3273571,7.607688],[-8.3304681,7.607509],[-8.3305391,7.607136],[-8.3302091,7.606344],[-8.3303281,7.606139],[-8.3310581,7.606146],[-8.3312641,7.605943],[-8.3312731,7.605789],[-8.3309391,7.605218],[-8.3309811,7.604851],[-8.3308241,7.604801],[-8.3300571,7.604806],[-8.3295151,7.604654],[-8.3295091,7.604381],[-8.3292741,7.603853],[-8.3291981,7.603053],[-8.3290181,7.602368],[-8.3286091,7.601931],[-8.3289541,7.601762],[-8.3294721,7.601661],[-8.3298121,7.60138],[-8.3311781,7.599927],[-8.3315651,7.599199],[-8.3318911,7.598689],[-8.3316371,7.598078],[-8.3320501,7.597792],[-8.3327481,7.597538],[-8.3334461,7.596872],[-8.3335731,7.596269],[-8.3340171,7.595603],[-8.3345601,7.595825],[-8.3357621,7.595032],[-8.3366171,7.594074],[-8.3387311,7.592966],[-8.3392831,7.592304],[-8.3396731,7.591964],[-8.3407401,7.59148],[-8.3427601,7.590816],[-8.3435481,7.590813],[-8.3434871,7.590162],[-8.3439321,7.590063],[-8.3445821,7.590114],[-8.3454881,7.589901],[-8.3459041,7.589691],[-8.3461911,7.590035],[-8.3471571,7.590859],[-8.3478511,7.591847],[-8.3493821,7.592215],[-8.3500831,7.591037],[-8.3519111,7.591036],[-8.3524351,7.590582],[-8.3524891,7.589697],[-8.3524751,7.588935],[-8.3536121,7.587937],[-8.3546581,7.587412],[-8.3559401,7.587997],[-8.3565821,7.587514],[-8.3580391,7.588861],[-8.3586751,7.588839],[-8.3594111,7.588278],[-8.3602381,7.587915],[-8.3606731,7.588341],[-8.3615921,7.588257],[-8.3619661,7.588316],[-8.3628081,7.589576],[-8.3634801,7.590344],[-8.3647181,7.590761],[-8.3664191,7.59145],[-8.3678161,7.591728],[-8.3696051,7.592249],[-8.3702731,7.592943],[-8.3721391,7.592657],[-8.3728411,7.594104],[-8.3731981,7.593771],[-8.3733171,7.593391],[-8.3736501,7.5932],[-8.3745551,7.593093],[-8.3762201,7.593759],[-8.3776241,7.593807],[-8.3792431,7.593664],[-8.3822401,7.593105],[-8.3825491,7.593391],[-8.3824351,7.594197],[-8.3822161,7.594818],[-8.3824061,7.595413],[-8.3827391,7.595818],[-8.3835011,7.596079],[-8.3841671,7.596841],[-8.3841911,7.597293],[-8.3840041,7.598626],[-8.3840101,7.600452],[-8.3835711,7.602987],[-8.3829541,7.603789],[-8.3825961,7.604891],[-8.3816451,7.606573],[-8.3815971,7.607501],[-8.3816921,7.608215],[-8.3816451,7.608667],[-8.3814781,7.609095],[-8.3815971,7.611046],[-8.3810591,7.611907],[-8.3812671,7.613675],[-8.3807021,7.614192],[-8.3805461,7.615209],[-8.3806471,7.615824],[-8.3802241,7.616457],[-8.3801701,7.616995],[-8.3805031,7.617233],[-8.3809341,7.617806],[-8.3809321,7.618336],[-8.3807171,7.618994],[-8.3808531,7.619582],[-8.3813591,7.62016],[-8.3820741,7.620543],[-8.3830171,7.621601],[-8.3841421,7.623256],[-8.3850881,7.62399],[-8.3860201,7.624404],[-8.3875441,7.623416],[-8.3886931,7.623274],[-8.3906901,7.623755],[-8.3913001,7.624365],[-8.3923701,7.624642],[-8.3927461,7.624789],[-8.3935051,7.625409],[-8.3938701,7.626075],[-8.3945671,7.626123],[-8.3955351,7.626825],[-8.3963471,7.627697],[-8.3970631,7.628078],[-8.3981481,7.627675],[-8.3987621,7.62717],[-8.3998231,7.625875],[-8.4003851,7.625277],[-8.4022441,7.625082],[-8.4033471,7.625394],[-8.4042281,7.625342],[-8.4049271,7.625165],[-8.4051151,7.624934],[-8.4054101,7.624675],[-8.4057601,7.624094],[-8.4064541,7.623965],[-8.4072281,7.623686],[-8.4076051,7.623322],[-8.4079021,7.622887],[-8.4081451,7.62246],[-8.4087401,7.621074],[-8.4095081,7.620057],[-8.4095291,7.619706],[-8.4103931,7.618595],[-8.4109491,7.618211],[-8.4115601,7.617608],[-8.4119721,7.616699],[-8.4122181,7.615501],[-8.4129661,7.613899],[-8.4135981,7.613326],[-8.4145821,7.612754],[-8.4150111,7.612678],[-8.4157651,7.612652],[-8.4165801,7.611398],[-8.4174851,7.610708],[-8.4180411,7.610197],[-8.4186901,7.609503],[-8.4205281,7.608323],[-8.4217981,7.607024],[-8.4226261,7.605436],[-8.4227441,7.604701],[-8.4233241,7.604048],[-8.4233991,7.603837],[-8.4233091,7.603597],[-8.4234051,7.603455],[-8.4244381,7.602979],[-8.4253131,7.601975],[-8.4264251,7.60136],[-8.4269851,7.600704],[-8.4274261,7.599959],[-8.4282091,7.599766],[-8.4293451,7.598749],[-8.4297141,7.598157],[-8.4300251,7.597526],[-8.4309531,7.596645],[-8.4309191,7.59593],[-8.4322821,7.593702],[-8.4324981,7.592986],[-8.4334051,7.592641],[-8.4344081,7.592506],[-8.4348781,7.592077],[-8.4372821,7.590149],[-8.4386161,7.588652],[-8.4399711,7.587889],[-8.4409231,7.586968],[-8.4416841,7.586414],[-8.4426151,7.585943],[-8.4433651,7.585406],[-8.4440381,7.584595],[-8.4456901,7.582391],[-8.4466811,7.580822],[-8.4474181,7.579275],[-8.4491551,7.578228],[-8.4509331,7.576973],[-8.4515111,7.575468],[-8.4524391,7.573826],[-8.4538431,7.572636],[-8.4553081,7.571559],[-8.4562221,7.57103],[-8.4571681,7.570235],[-8.4579831,7.569448],[-8.4588161,7.569067],[-8.4599821,7.56783],[-8.4606721,7.566521],[-8.4616241,7.56595],[-8.4626951,7.564903],[-8.4637411,7.563499],[-8.4651221,7.562191],[-8.4668821,7.560311],[-8.4680241,7.559597],[-8.4685721,7.559121],[-8.4695971,7.5577791],[-8.4710168,7.5571723],[-8.4717173,7.5586301],[-8.489244,7.5725609],[-8.499756,7.5809269],[-8.499881,7.5813159],[-8.5037378,7.5841892],[-8.518242,7.5951559],[-8.52105,7.5973559],[-8.52179,7.5978499],[-8.558759,7.6259979],[-8.559864,7.6263699],[-8.56103,7.6269249],[-8.561466,7.6270559],[-8.561841,7.6271259],[-8.562682,7.6271559],[-8.562824,7.6272459],[-8.563047,7.6275189],[-8.563575,7.6284479],[-8.564366,7.6290929],[-8.564852,7.6293859],[-8.56541,7.6296279],[-8.565836,7.6297589],[-8.566302,7.6297879],[-8.567204,7.6299389],[-8.567863,7.6300999],[-8.568583,7.6303919],[-8.569566,7.6309569],[-8.569942,7.6315019],[-8.570094,7.6318449],[-8.570165,7.6322699],[-8.570115,7.6324509],[-8.56978,7.6327549],[-8.569791,7.6329259],[-8.569142,7.6335129],[-8.568849,7.6338459],[-8.568585,7.6339979],[-8.567826,7.6346049],[-8.56738,7.6348169],[-8.566681,7.6354639],[-8.56657,7.6356559],[-8.566225,7.6357879],[-8.566134,7.6362619],[-8.566013,7.6364339],[-8.565698,7.6365149],[-8.565101,7.6369599],[-8.564544,7.6376369],[-8.564341,7.6376579],[-8.564118,7.6375369],[-8.563814,7.6372539],[-8.563682,7.6372239],[-8.563469,7.6372849],[-8.563388,7.6373759],[-8.563267,7.6384669],[-8.563024,7.6389719],[-8.562761,7.6391939],[-8.562052,7.6396189],[-8.561849,7.6398509],[-8.561718,7.6402559],[-8.561505,7.6406189],[-8.561242,7.6407099],[-8.56109,7.6408419],[-8.560958,7.6413269],[-8.560949,7.6416499],[-8.561101,7.6423769],[-8.561355,7.6427499],[-8.561335,7.6428919],[-8.561011,7.6433469],[-8.560676,7.6433669],[-8.560413,7.6434779],[-8.560291,7.6436099],[-8.560291,7.6440639],[-8.560464,7.6445289],[-8.560393,7.6448119],[-8.56013,7.6451049],[-8.559796,7.6452359],[-8.559644,7.6454079],[-8.55938,7.6457919],[-8.559219,7.6461859],[-8.559077,7.6463379],[-8.558854,7.6464889],[-8.558631,7.6465699],[-8.558489,7.6467119],[-8.558368,7.6469849],[-8.558206,7.6471259],[-8.557922,7.6472879],[-8.557608,7.6473489],[-8.557476,7.6475109],[-8.557456,7.6479749],[-8.557629,7.6482069],[-8.557659,7.6483789],[-8.557477,7.6489649],[-8.557285,7.6492679],[-8.557042,7.6494909],[-8.556018,7.6502079],[-8.555958,7.6504709],[-8.555644,7.6511579],[-8.555625,7.6531379],[-8.555494,7.6537129],[-8.554957,7.6544809],[-8.554785,7.6549259],[-8.55437,7.6553609],[-8.554188,7.6558759],[-8.554015,7.6560879],[-8.553813,7.6565019],[-8.553762,7.6567039],[-8.553743,7.6572899],[-8.554006,7.6576229],[-8.554899,7.6579559],[-8.555243,7.6583089],[-8.555274,7.6584699],[-8.555031,7.6589759],[-8.555041,7.6591879],[-8.555143,7.6593689],[-8.555599,7.6596919],[-8.555751,7.6598739],[-8.555853,7.6600959],[-8.555934,7.6605609],[-8.556401,7.6610249],[-8.556401,7.6616709],[-8.557192,7.6627809],[-8.557264,7.6630139],[-8.557051,7.6636899],[-8.556828,7.6641849],[-8.556849,7.6644179],[-8.556971,7.6646699],[-8.557447,7.6651339],[-8.557498,7.6652859],[-8.557225,7.6655889],[-8.557103,7.6658819],[-8.55683,7.6661549],[-8.556597,7.6666199],[-8.556141,7.6672969],[-8.55603,7.6675899],[-8.55601,7.6678419],[-8.556172,7.6682859],[-8.556112,7.6685089],[-8.55596,7.6687009],[-8.555575,7.6690239],[-8.555099,7.6692269],[-8.554835,7.6694589],[-8.554815,7.6695799],[-8.554937,7.6698019],[-8.555201,7.6701149],[-8.555343,7.6703779],[-8.555383,7.6705899],[-8.555302,7.6708629],[-8.554816,7.6713779],[-8.554563,7.6717419],[-8.554239,7.6719739],[-8.554077,7.6721969],[-8.554047,7.6724999],[-8.554179,7.6727519],[-8.554067,7.6734189],[-8.55421,7.6737819],[-8.554139,7.6742369],[-8.55419,7.6747419],[-8.554393,7.6748119],[-8.555731,7.6749629],[-8.555883,7.6751639],[-8.555863,7.6754879],[-8.555407,7.6761649],[-8.555469,7.6768619],[-8.555631,7.6772049],[-8.555905,7.6775979],[-8.555845,7.6785279],[-8.556007,7.6786589],[-8.55626,7.6787799],[-8.556423,7.6790019],[-8.556494,7.6794359],[-8.556272,7.6802539],[-8.556403,7.6805169],[-8.556951,7.6810719],[-8.557539,7.6815459],[-8.557803,7.6818279],[-8.558067,7.6823739],[-8.558189,7.6829089],[-8.5582,7.6836969],[-8.558018,7.6847369],[-8.558079,7.6849789],[-8.558292,7.6852419],[-8.558424,7.6854939],[-8.558384,7.6862309],[-8.558627,7.6867159],[-8.558709,7.6869779],[-8.558719,7.6873019],[-8.558486,7.6878879],[-8.558274,7.6881199],[-8.557757,7.6886559],[-8.557028,7.6893029],[-8.555954,7.6901619],[-8.55569,7.6906269],[-8.555285,7.6909099],[-8.555123,7.6910819],[-8.555113,7.6915569],[-8.554911,7.6921119],[-8.55483,7.6923039],[-8.554506,7.6927189],[-8.553989,7.6932039],[-8.553553,7.6931939],[-8.553706,7.6942539],[-8.55392,7.6951429],[-8.55395,7.6954759],[-8.5538849,7.6957521],[-8.5817851,7.6957766],[-8.6764353,7.6957382],[-8.6767757,7.6954615],[-8.6770705,7.6952545],[-8.6770828,7.695002],[-8.6768586,7.6947341],[-8.6766344,7.6942077],[-8.6768828,7.6941053],[-8.6772058,7.6936193],[-8.6774068,7.6935333],[-8.6775498,7.6934103],[-8.6775678,7.6928773],[-8.6770908,7.6926123],[-8.6769098,7.6923653],[-8.676569,7.6917611],[-8.6768318,7.6906458],[-8.6769171,7.6897888],[-8.6770832,7.6886006],[-8.6774242,7.6878275],[-8.6781904,7.6876164],[-8.6785083,7.6874211],[-8.6787258,7.6874413],[-8.6797178,7.6867943],[-8.6802791,7.6862585],[-8.6811056,7.6855339],[-8.6814935,7.6850361],[-8.6811819,7.6845824],[-8.6813981,7.6841729],[-8.6820816,7.6839337],[-8.6819705,7.6836504],[-8.6814759,7.6835517],[-8.6814722,7.6832806],[-8.6820974,7.683035],[-8.6818717,7.6826446],[-8.6811597,7.6826734],[-8.681119,7.6820942],[-8.6814084,7.6814832],[-8.681354,7.6811561],[-8.6807182,7.6811489],[-8.6798066,7.6811333],[-8.6792924,7.6811186],[-8.6785846,7.6804394],[-8.6779965,7.6799637],[-8.6779938,7.6793463],[-8.6779548,7.6787483],[-8.6777068,7.6780833],[-8.6778018,7.6778553],[-8.6780488,7.6774933],[-8.6784498,7.6771223],[-8.6789358,7.6768463],[-8.6792878,7.6765133],[-8.6795168,7.6762093],[-8.6797068,7.6757913],[-8.679958,7.6751149],[-8.6796083,7.6749259],[-8.6794652,7.6748377],[-8.6795415,7.6746297],[-8.6800247,7.6743588],[-8.6800629,7.6741445],[-8.6795765,7.6736121],[-8.6795733,7.6733096],[-8.6797036,7.6730166],[-8.6799166,7.6728496],[-8.6804094,7.6727614],[-8.6803204,7.6722195],[-8.6805906,7.6719989],[-8.6813377,7.6711892],[-8.6811692,7.6708741],[-8.6817998,7.6704393],[-8.6823718,7.6706853],[-8.6833638,7.6707983],[-8.6838788,7.6705223],[-8.6843368,7.6704833],[-8.6847796,7.6705884],[-8.6856761,7.6704781],[-8.6859511,7.6703883],[-8.6861339,7.6706782],[-8.6860248,7.6709283],[-8.6858338,7.6710993],[-8.6855601,7.6711476],[-8.6853598,7.6711964],[-8.6848538,7.6715758],[-8.6847743,7.6721745],[-8.6854451,7.6722721],[-8.6857968,7.6720873],[-8.6864648,7.6718973],[-8.6868078,7.6717543],[-8.6877318,7.6707933],[-8.6880268,7.6706413],[-8.6879185,7.6698776],[-8.6880615,7.6691057],[-8.6888945,7.6684945],[-8.6898058,7.6675953],[-8.6903138,7.6670339],[-8.6909837,7.666771],[-8.6914378,7.6664992],[-8.6920405,7.6659036],[-8.6921962,7.6653538],[-8.692422,7.665075],[-8.6927494,7.6649679],[-8.6929608,7.6648749],[-8.6931945,7.664229],[-8.6933248,7.6640305],[-8.6936078,7.6640778],[-8.6938278,7.6640873],[-8.6939618,7.6639063],[-8.6940417,7.6635831],[-8.6939352,7.6633815],[-8.694151,7.6631743],[-8.6947422,7.6630607],[-8.6946831,7.662678],[-8.6945274,7.6622369],[-8.6947626,7.6622023],[-8.6953444,7.6626717],[-8.6958244,7.6634216],[-8.6961423,7.6640612],[-8.6963426,7.664099],[-8.6965206,7.6638658],[-8.6964571,7.6629773],[-8.696314,7.6620132],[-8.6964508,7.6616981],[-8.6969785,7.661298],[-8.6974268,7.6610459],[-8.6977542,7.6606836],[-8.6976828,7.6604913],[-8.6975058,7.6602153],[-8.6974568,7.6598163],[-8.6975338,7.6596453],[-8.6984108,7.6595783],[-8.6985628,7.6594923],[-8.6991728,7.6587603],[-8.6993918,7.6583793],[-8.6997058,7.6580463],[-8.6998588,7.6578093],[-8.6994949,7.6572476],[-8.6994918,7.6568317],[-8.7001069,7.6569183],[-8.7002961,7.6568096],[-8.7002229,7.6564741],[-8.7000767,7.6563969],[-8.7000862,7.6562189],[-8.7004391,7.6562598],[-8.7009144,7.6564032],[-8.7011195,7.6562929],[-8.7010257,7.6559337],[-8.7014231,7.6557589],[-8.7017966,7.6556832],[-8.7015884,7.6551649],[-8.7015168,7.6549617],[-8.7016567,7.6543914],[-8.7018332,7.6539834],[-8.7022608,7.6539865],[-8.7025183,7.6540165],[-8.7027678,7.6537597],[-8.7029586,7.6534651],[-8.7029204,7.6531154],[-8.7031636,7.6527703],[-8.7035721,7.6528932],[-8.703809,7.6526364],[-8.7037057,7.6521008],[-8.7037041,7.6519007],[-8.7039711,7.6516817],[-8.7041793,7.651688],[-8.7044019,7.6517999],[-8.7044829,7.6515447],[-8.7044353,7.6512895],[-8.7042795,7.6510768],[-8.7044369,7.6510311],[-8.7047548,7.6509271],[-8.7045195,7.6505475],[-8.7043923,7.6505018],[-8.704111,7.6503442],[-8.7041142,7.6500906],[-8.7043908,7.6499425],[-8.7048565,7.6500764],[-8.7050711,7.6499929],[-8.7051553,7.6497566],[-8.7051331,7.6495266],[-8.7052447,7.6494142],[-8.7054729,7.6494298],[-8.7056786,7.6492304],[-8.7059742,7.6491825],[-8.7064765,7.6491636],[-8.706858,7.6492297],[-8.7073476,7.6493967],[-8.707516,7.6490344],[-8.7073603,7.6486264],[-8.7070344,7.6486752],[-8.7068198,7.6485177],[-8.7065989,7.648201],[-8.705855,7.647648],[-8.7057707,7.6473203],[-8.7059344,7.6470793],[-8.7057405,7.64675],[-8.705483,7.6465799],[-8.7053511,7.646342],[-8.705483,7.6461813],[-8.7059281,7.6461608],[-8.7060791,7.6461939],[-8.7062841,7.6459671],[-8.7061061,7.6455779],[-8.7057199,7.6455354],[-8.7055959,7.6455385],[-8.7055959,7.6452203],[-8.7059042,7.6449698],[-8.7061459,7.6448375],[-8.706122,7.6445303],[-8.7063398,7.6445129],[-8.7065925,7.6446279],[-8.7071155,7.6447855],[-8.7076528,7.6450691],[-8.7076938,7.6451813],[-8.7080748,7.6453233],[-8.7084468,7.6453703],[-8.7087114,7.6450895],[-8.7087495,7.6449036],[-8.7090786,7.6448469],[-8.7093075,7.6447666],[-8.7096063,7.6446894],[-8.7097684,7.6447083],[-8.7100705,7.6446279],[-8.7101468,7.644357],[-8.7104694,7.6441679],[-8.7109606,7.6441443],[-8.711331,7.6437819],[-8.7114152,7.6436039],[-8.7117967,7.6433251],[-8.7124198,7.6429864],[-8.7124039,7.6423656],[-8.7124468,7.641997],[-8.7128363,7.6418788],[-8.7132639,7.6416898],[-8.7137535,7.641496],[-8.7141381,7.6413637],[-8.7139728,7.6410375],[-8.7138854,7.6406815],[-8.7139029,7.6400009],[-8.7141985,7.6392888],[-8.714243,7.6389958],[-8.7143193,7.638416],[-8.7143518,7.6381984],[-8.7138368,7.6381614],[-8.7132765,7.638265],[-8.7129157,7.6382627],[-8.7125909,7.6383118],[-8.7123234,7.638451],[-8.7119727,7.6384198],[-8.7116647,7.6380845],[-8.711477,7.6378105],[-8.7110645,7.6375721],[-8.7107476,7.6372501],[-8.7103722,7.6369159],[-8.7102519,7.6368067],[-8.7100612,7.6364047],[-8.7099101,7.6361936],[-8.7096844,7.6359683],[-8.7096002,7.6357352],[-8.7093808,7.6354831],[-8.7088833,7.6351522],[-8.7088372,7.6348954],[-8.7085272,7.6346812],[-8.7082634,7.6343582],[-8.7084398,7.633884],[-8.7084191,7.6336792],[-8.7082681,7.633591],[-8.7081171,7.6336429],[-8.7079741,7.6338793],[-8.7078183,7.6337674],[-8.7077563,7.6336051],[-8.7079375,7.6332837],[-8.7078024,7.6330726],[-8.7077038,7.6330033],[-8.7074511,7.632997],[-8.7072937,7.6330553],[-8.7072413,7.6330049],[-8.7071427,7.6326094],[-8.7070505,7.6325055],[-8.7070807,7.6323101],[-8.7073891,7.6321368],[-8.707521,7.6317508],[-8.7075131,7.6313837],[-8.7073367,7.6311884],[-8.7068662,7.6311049],[-8.7065546,7.6310529],[-8.7065292,7.6306984],[-8.7064084,7.630147],[-8.7064513,7.6297058],[-8.7064942,7.6295341],[-8.7066961,7.6294569],[-8.7066468,7.6291812],[-8.7062828,7.6291009],[-8.7059379,7.6290898],[-8.7059824,7.6286408],[-8.7060714,7.6285305],[-8.7064386,7.6285195],[-8.7064704,7.6283698],[-8.706305,7.6281304],[-8.7061954,7.6280831],[-8.7065173,7.6277101],[-8.706297,7.62724],[-8.7060339,7.6269125],[-8.7062632,7.6267587],[-8.7067668,7.6270573],[-8.7071422,7.627289],[-8.7072861,7.6271731],[-8.7071017,7.6266696],[-8.7070118,7.6262975],[-8.7065577,7.6261282],[-8.7061846,7.6258809],[-8.7055326,7.6255689],[-8.7050313,7.6253038],[-8.7045975,7.6251122],[-8.704566,7.6248247],[-8.7045256,7.6244883],[-8.7047144,7.6244326],[-8.7049684,7.6245485],[-8.7051707,7.6247111],[-8.7053348,7.6245752],[-8.705382,7.6242343],[-8.7052831,7.6239848],[-8.7050044,7.6237174],[-8.7047706,7.6235302],[-8.7047796,7.6233832],[-8.7052696,7.6229687],[-8.7060047,7.622942],[-8.7062025,7.6224942],[-8.7063959,7.6224006],[-8.7070163,7.6225031],[-8.7075378,7.6225432],[-8.7078031,7.6221288],[-8.7081358,7.6220329],[-8.7083246,7.6217433],[-8.708682,7.6216542],[-8.7091204,7.6217076],[-8.7090664,7.6214135],[-8.7084415,7.6210971],[-8.7080639,7.6209568],[-8.7075491,7.6207228],[-8.7072096,7.6202215],[-8.7067578,7.6199006],[-8.706551,7.6198583],[-8.706569,7.6195731],[-8.7068297,7.6193793],[-8.70647,7.619054],[-8.7064813,7.6187287],[-8.7065779,7.6186395],[-8.7066724,7.6181917],[-8.7073175,7.6181716],[-8.7078593,7.6175188],[-8.7081245,7.6170041],[-8.7082167,7.6168593],[-8.7083493,7.6162242],[-8.7088237,7.6163067],[-8.7093317,7.6165161],[-8.7096149,7.616759],[-8.7097363,7.6167189],[-8.7096487,7.6162198],[-8.7097004,7.6157229],[-8.7100938,7.6158031],[-8.7104872,7.6164448],[-8.7109053,7.6163334],[-8.7109143,7.6158789],[-8.7110536,7.6156026],[-8.711166,7.6152149],[-8.7115145,7.6146311],[-8.7118944,7.6139671],[-8.7124901,7.6136953],[-8.7123687,7.6133923],[-8.7121462,7.6133254],[-8.7115302,7.6134413],[-8.7114358,7.6131984],[-8.7114043,7.612882],[-8.7116741,7.6126458],[-8.7124002,7.6126837],[-8.7127519,7.6127064],[-8.7130289,7.6127254],[-8.7130189,7.6125354],[-8.7128369,7.6121174],[-8.7128369,7.6116994],[-8.7124429,7.6114627],[-8.7119955,7.6112154],[-8.7121462,7.6104689],[-8.712027,7.6101592],[-8.7121679,7.6098664],[-8.7119669,7.6097624],[-8.7115289,7.6096394],[-8.7113849,7.6094964],[-8.7112899,7.6093264],[-8.7112039,7.6089084],[-8.7112419,7.6087654],[-8.7115369,7.6083374],[-8.7120023,7.6079578],[-8.7120517,7.6074854],[-8.7119483,7.6072336],[-8.712054,7.6071601],[-8.7124631,7.6071868],[-8.7127733,7.607062],[-8.7129352,7.6067857],[-8.7127239,7.6064003],[-8.7124856,7.6061062],[-8.7118652,7.6059435],[-8.7117415,7.6058031],[-8.7125261,7.6052706],[-8.7129483,7.6048719],[-8.713918,7.6045663],[-8.7144711,7.6041409],[-8.7144393,7.6038194],[-8.7142136,7.6032743],[-8.713813,7.6026945],[-8.7135746,7.6026567],[-8.7131041,7.6028268],[-8.7126686,7.6026189],[-8.7122044,7.6025306],[-8.7120804,7.6019886],[-8.7121853,7.6016641],[-8.7121059,7.6008511],[-8.7121059,7.6003532],[-8.7122489,7.60012],[-8.7129529,7.6000848],[-8.7131328,7.5996904],[-8.7131606,7.5991919],[-8.7132715,7.5987383],[-8.7137841,7.5988482],[-8.7138737,7.598708],[-8.7137197,7.5986476],[-8.7134922,7.5983511],[-8.7133507,7.5979445],[-8.7134707,7.5975166],[-8.7132683,7.5973817],[-8.7128492,7.5977261],[-8.7126342,7.5975859],[-8.7128647,7.5972796],[-8.7125912,7.5970021],[-8.7121686,7.5974035],[-8.7109685,7.5970058],[-8.7106103,7.596356],[-8.7102234,7.5962104],[-8.7101876,7.595905],[-8.7106927,7.5958163],[-8.711531,7.5962457],[-8.7119573,7.5961835],[-8.7121579,7.5958764],[-8.7124301,7.5954467],[-8.7125842,7.5953402],[-8.712774,7.5947437],[-8.7135084,7.5939234],[-8.7139419,7.5935506],[-8.7141461,7.5933126],[-8.7141819,7.5930943],[-8.7143825,7.5930303],[-8.7145992,7.5929806],[-8.7146261,7.5928422],[-8.7145114,7.5925634],[-8.7142213,7.5922722],[-8.7142392,7.5918035],[-8.7146762,7.5914342],[-8.7147336,7.5909833],[-8.7140171,7.5908483],[-8.714164,7.5905678],[-8.7146665,7.5902919],[-8.7148666,7.5901086],[-8.7147349,7.5899254],[-8.7143904,7.589835],[-8.7142663,7.5896567],[-8.71436,7.5894081],[-8.7148565,7.5893001],[-8.7153074,7.5894006],[-8.7155126,7.5895864],[-8.7158165,7.5894483],[-8.7160774,7.589147],[-8.7159077,7.5887352],[-8.7161636,7.5884439],[-8.7164093,7.588356],[-8.7164321,7.5876882],[-8.7163738,7.5865382],[-8.7162928,7.5861665],[-8.7161256,7.5854459],[-8.7163383,7.5851597],[-8.7172148,7.5852827],[-8.7178759,7.5854183],[-8.7179519,7.5851069],[-8.7176479,7.5849488],[-8.7177797,7.5847931],[-8.7184256,7.5847579],[-8.7186181,7.5844742],[-8.7188841,7.5847152],[-8.7195072,7.5846349],[-8.7195857,7.5841352],[-8.719107,7.5840247],[-8.7190335,7.5838063],[-8.7191653,7.5834347],[-8.719031,7.5831309],[-8.7187245,7.5831032],[-8.7183977,7.5832489],[-8.7183116,7.5829225],[-8.7188973,7.5824852],[-8.7186591,7.5818299],[-8.7183172,7.5812875],[-8.7181703,7.5809912],[-8.7182919,7.5806296],[-8.7186946,7.5800295],[-8.7190492,7.5801375],[-8.7195305,7.580474],[-8.7198269,7.5804539],[-8.7199738,7.5802003],[-8.7196572,7.5796027],[-8.7197965,7.5793993],[-8.7200929,7.5794796],[-8.7203234,7.5798688],[-8.7205868,7.5796278],[-8.7201891,7.5783095],[-8.7203673,7.5775895],[-8.7207574,7.5774313],[-8.7213197,7.5772932],[-8.7214464,7.57657],[-8.7223507,7.5764244],[-8.7226673,7.5763014],[-8.7225761,7.5758846],[-8.722875,7.5756962],[-8.7232626,7.5754602],[-8.7232094,7.5751112],[-8.723337,7.5750525],[-8.7235184,7.5751162],[-8.7236312,7.5750055],[-8.7237123,7.5747975],[-8.7234703,7.5746546],[-8.7230288,7.5744984],[-8.7228335,7.5743337],[-8.7228477,7.5740762],[-8.723047,7.5740462],[-8.7235024,7.5741732],[-8.7236554,7.5740145],[-8.7236625,7.5738963],[-8.723586,7.5737923],[-8.7233244,7.5736815],[-8.7230665,7.5736124],[-8.7228604,7.5736992],[-8.7225488,7.5738858],[-8.722437,7.5738395],[-8.7223656,7.5734325],[-8.7222796,7.5732681],[-8.7220774,7.573198],[-8.7217785,7.5732386],[-8.7212964,7.5729494],[-8.7215384,7.572676],[-8.7215621,7.5724823],[-8.7214256,7.5722724],[-8.7214591,7.5719728],[-8.7215559,7.5718061],[-8.7217945,7.5717131],[-8.7217869,7.5716571],[-8.7214908,7.5714884],[-8.7214898,7.5713744],[-8.7217568,7.5710414],[-8.7216378,7.5708397],[-8.7211931,7.5708616],[-8.7208541,7.5708582],[-8.720676,7.5708571],[-8.7205268,7.5708154],[-8.7204888,7.5706444],[-8.7205838,7.5704344],[-8.7207258,7.5702544],[-8.7207448,7.5701304],[-8.7206878,7.5699784],[-8.7202488,7.5698654],[-8.7199938,7.5697539],[-8.7200146,7.5694911],[-8.7202258,7.5693692],[-8.7202868,7.5691624],[-8.7202488,7.5690384],[-8.7200988,7.5686759],[-8.7195138,7.5687354],[-8.7192497,7.5686129],[-8.7192301,7.5683078],[-8.7196073,7.5683181],[-8.7195429,7.5681521],[-8.7196368,7.5679754],[-8.7197418,7.5678224],[-8.7202268,7.567793],[-8.7202198,7.5676582],[-8.7198727,7.5675902],[-8.7195805,7.5673405],[-8.7190298,7.5671417],[-8.7186821,7.5668659],[-8.7183938,7.5666665],[-8.7183083,7.5664598],[-8.7178085,7.5664842],[-8.7178993,7.566132],[-8.7183428,7.5659061],[-8.7184803,7.5655382],[-8.7187176,7.5651876],[-8.7190793,7.5648021],[-8.7192708,7.5645644],[-8.719682,7.5647957],[-8.719935,7.5647616],[-8.7200346,7.5644829],[-8.7198428,7.5640124],[-8.7202136,7.5636482],[-8.7203911,7.5636803],[-8.7205198,7.563944],[-8.7205683,7.5642396],[-8.7208325,7.5643494],[-8.7212817,7.5638939],[-8.7218614,7.5632287],[-8.7220632,7.5627544],[-8.7218067,7.5620261],[-8.7218585,7.5613692],[-8.7213747,7.561097],[-8.7213013,7.5609524],[-8.721344,7.5606702],[-8.7213831,7.5602223],[-8.7217465,7.5602286],[-8.7219381,7.5603246],[-8.7222014,7.5605961],[-8.7224149,7.5604374],[-8.7225025,7.5602623],[-8.7224546,7.5597813],[-8.7226306,7.5596476],[-8.7227841,7.5594556],[-8.7228381,7.5592158],[-8.7224646,7.559079],[-8.7219463,7.5590864],[-8.7218758,7.5587223],[-8.7221928,7.5586126],[-8.7227078,7.558709],[-8.7228695,7.5584223],[-8.7232382,7.5574704],[-8.723478,7.557496],[-8.7235598,7.5577305],[-8.7237911,7.5578081],[-8.7240259,7.5578081],[-8.7243425,7.5580868],[-8.7245987,7.5580586],[-8.7250043,7.5574343],[-8.7253103,7.5574378],[-8.7257052,7.5566301],[-8.7258547,7.5560305],[-8.7255131,7.5554309],[-8.7253708,7.5550676],[-8.7255202,7.5548525],[-8.7255131,7.5544751],[-8.7251751,7.5540377],[-8.7247055,7.5537837],[-8.7244457,7.5541717],[-8.7240615,7.5552298],[-8.7239547,7.5560234],[-8.7238017,7.5562668],[-8.7235194,7.5562308],[-8.7233433,7.5561884],[-8.7232301,7.5556024],[-8.7230938,7.5553524],[-8.7221978,7.5549354],[-8.7220348,7.5548404],[-8.7217256,7.5546422],[-8.7216428,7.5538434],[-8.7214011,7.5532904],[-8.7210388,7.5528539],[-8.7208275,7.5525073],[-8.7206488,7.552213],[-8.7206212,7.5520309],[-8.7202111,7.5517765],[-8.7198136,7.5516044],[-8.7196073,7.5513351],[-8.7195746,7.5508462],[-8.7196475,7.5500706],[-8.7196702,7.5497863],[-8.7197356,7.5494645],[-8.7194312,7.5493698],[-8.7189984,7.5494022],[-8.7185305,7.5491403],[-8.7179317,7.5487537],[-8.7173631,7.548619],[-8.7169288,7.5489174],[-8.7168238,7.5490884],[-8.7167668,7.5497254],[-8.7166148,7.5500774],[-8.7166538,7.5504474],[-8.7168258,7.5506464],[-8.7168828,7.5513404],[-8.7169978,7.5515584],[-8.7170168,7.5517584],[-8.7169218,7.5521104],[-8.7165807,7.5523377],[-8.7163719,7.5524798],[-8.7163643,7.5526494],[-8.7162083,7.5528814],[-8.7161077,7.5531582],[-8.7157177,7.5532505],[-8.7152121,7.5534425],[-8.7151693,7.5537967],[-8.7151693,7.5539812],[-8.7149303,7.5540635],[-8.7145218,7.5539274],[-8.7144648,7.5537468],[-8.7143365,7.5535548],[-8.7142812,7.5533602],[-8.7141982,7.5531507],[-8.7141504,7.5529612],[-8.7141956,7.5527392],[-8.7141051,7.5524324],[-8.7137126,7.5524773],[-8.7131818,7.5525721],[-8.7126898,7.5525614],[-8.7118978,7.5523444],[-8.7116888,7.5521734],[-8.7115738,7.5519934],[-8.7115112,7.5517566],[-8.7118156,7.5511181],[-8.712193,7.5508787],[-8.712666,7.5508487],[-8.7129503,7.5507864],[-8.7131264,7.5505544],[-8.7131692,7.5502901],[-8.7128678,7.5497584],[-8.7126786,7.5495144],[-8.7124547,7.5492675],[-8.7125553,7.5490281],[-8.7128748,7.5489757],[-8.7132673,7.5490555],[-8.7137654,7.5494396],[-8.7140925,7.5497563],[-8.7144498,7.5499459],[-8.7145856,7.5498461],[-8.7147064,7.5496815],[-8.7150385,7.5495194],[-8.7153378,7.5486689],[-8.7154989,7.5484769],[-8.7152649,7.54824],[-8.7154259,7.5478858],[-8.7153278,7.5474094],[-8.7154611,7.5472573],[-8.7154662,7.5468732],[-8.7154098,7.5466294],[-8.7153253,7.5461973],[-8.7152221,7.5457234],[-8.7151416,7.5454067],[-8.715051,7.5452595],[-8.7147995,7.545262],[-8.7144699,7.5453219],[-8.7141126,7.5454665],[-8.7136245,7.5458082],[-8.7133252,7.5459479],[-8.7124918,7.5459774],[-8.7117133,7.5458854],[-8.7113575,7.5459383],[-8.7109021,7.5458924],[-8.7106317,7.5457902],[-8.7106085,7.5455785],[-8.7107775,7.5454022],[-8.7112721,7.5450636],[-8.7114429,7.5445204],[-8.7114536,7.5441394],[-8.7118627,7.5438008],[-8.7122221,7.5438961],[-8.7124035,7.5437373],[-8.7123288,7.5434305],[-8.712126,7.5430601],[-8.7122363,7.5426157],[-8.7126028,7.542196],[-8.7127415,7.5418009],[-8.7126597,7.541293],[-8.7129016,7.540838],[-8.7130297,7.5401185],[-8.713567,7.5395435],[-8.7139263,7.5394306],[-8.7141825,7.5393777],[-8.714549,7.5392719],[-8.7145818,7.5389714],[-8.7144743,7.5384007],[-8.7145454,7.538115],[-8.7147553,7.5378646],[-8.7151467,7.5375824],[-8.7154478,7.5373554],[-8.7155618,7.5369084],[-8.7154054,7.5357755],[-8.7154671,7.5347867],[-8.715477,7.5342336],[-8.7158596,7.533678],[-8.7160695,7.53335],[-8.7163208,7.5332304],[-8.716388,7.5328556],[-8.7165509,7.532579],[-8.7164793,7.5322364],[-8.7167336,7.5320186],[-8.7172595,7.531999],[-8.7172619,7.5312451],[-8.7174866,7.5311815],[-8.717694,7.5312525],[-8.7178638,7.5314994],[-8.7180158,7.5314414],[-8.7181298,7.5312234],[-8.7181108,7.5309854],[-8.7179705,7.5306798],[-8.7174051,7.5305109],[-8.7171286,7.5304277],[-8.7172817,7.5301805],[-8.7176989,7.5300214],[-8.7179853,7.5297766],[-8.7181952,7.5296518],[-8.7182223,7.5294535],[-8.7181186,7.5292577],[-8.7179088,7.529128],[-8.7173286,7.52927],[-8.7172101,7.5292895],[-8.7171558,7.5292039],[-8.7171657,7.5289836],[-8.7173829,7.5285969],[-8.7174743,7.5283913],[-8.717773,7.5280217],[-8.7180223,7.5277843],[-8.718089,7.5275077],[-8.7179532,7.5273437],[-8.7175557,7.5272556],[-8.7172298,7.5274424],[-8.7168916,7.5274392],[-8.716699,7.5270353],[-8.716699,7.5268714],[-8.7164201,7.5267025],[-8.7161428,7.5268454],[-8.7160568,7.5271014],[-8.7160497,7.5274686],[-8.71583,7.5276742],[-8.7155733,7.5277329],[-8.7153239,7.5278749],[-8.7148746,7.5281784],[-8.7149264,7.5285651],[-8.7145981,7.5289616],[-8.7144198,7.5290234],[-8.7141389,7.5290203],[-8.713966,7.5288661],[-8.7137784,7.5286875],[-8.7134797,7.5285333],[-8.7128738,7.5282934],[-8.7126921,7.5281808],[-8.7124181,7.5279948],[-8.7121119,7.5277574],[-8.7118527,7.5277941],[-8.7116182,7.52775],[-8.7115145,7.5275493],[-8.711596,7.5271871],[-8.7119984,7.5267784],[-8.7125668,7.5263084],[-8.7127478,7.5260034],[-8.7129464,7.5255056],[-8.7129267,7.525092],[-8.7129118,7.5246979],[-8.7127662,7.5244116],[-8.7121194,7.524157],[-8.711675,7.5239098],[-8.7113058,7.5236394],[-8.7105961,7.5226297],[-8.7100949,7.5225],[-8.7098332,7.5225685],[-8.7096357,7.5223017],[-8.7095962,7.5217926],[-8.7096357,7.5214647],[-8.7092456,7.5215063],[-8.7090037,7.5215748],[-8.7087617,7.5216311],[-8.7085198,7.5216629],[-8.7084457,7.5213741],[-8.7088555,7.5209433],[-8.7091444,7.5206716],[-8.7095221,7.5205762],[-8.7097008,7.5205534],[-8.7098406,7.5202825],[-8.7097578,7.5199924],[-8.7096777,7.5197342],[-8.7092135,7.5194943],[-8.7085395,7.5191297],[-8.7082028,7.5188544],[-8.7080218,7.5186644],[-8.7077569,7.5184198],[-8.7079223,7.5181702],[-8.7082828,7.5180209],[-8.7089839,7.5179328],[-8.7099567,7.5176709],[-8.7102159,7.5175191],[-8.7103689,7.5173502],[-8.7103591,7.5170492],[-8.7100579,7.5167799],[-8.7096283,7.5164813],[-8.7091938,7.5160065],[-8.7087988,7.5157544],[-8.7086136,7.5157519],[-8.7084013,7.5158988],[-8.7082359,7.5162366],[-8.7081421,7.5169439],[-8.7080236,7.5170761],[-8.7076927,7.5171373],[-8.707194,7.5171593],[-8.7070064,7.5168313],[-8.7069471,7.5163883],[-8.7066311,7.5158547],[-8.7063893,7.5155702],[-8.7063893,7.5151437],[-8.7067407,7.515036],[-8.7072937,7.515083],[-8.7078267,7.514873],[-8.7084087,7.514521],[-8.7090087,7.514064],[-8.7095567,7.51348],[-8.7097887,7.512971],[-8.7099165,7.5124898],[-8.7098267,7.51221],[-8.7097307,7.512039],[-8.7097497,7.511735],[-8.7098662,7.5114771],[-8.7102551,7.5116146],[-8.7104602,7.5115073],[-8.7108803,7.5116645],[-8.7110996,7.511677],[-8.7118263,7.5111918],[-8.712103,7.5108925],[-8.7122892,7.5103151],[-8.7129069,7.5102378],[-8.7131006,7.5103088],[-8.7132616,7.5101604],[-8.7136641,7.5102415],[-8.7140252,7.5103014],[-8.7142239,7.5104448],[-8.7145409,7.5104236],[-8.7147862,7.5102914],[-8.7149812,7.5099883],[-8.7150202,7.5097052],[-8.7153548,7.5096591],[-8.7157347,7.5097913],[-8.7163486,7.5098861],[-8.7166882,7.5099422],[-8.7169109,7.5099073],[-8.7170895,7.5095793],[-8.7174165,7.509497],[-8.717931,7.5095643],[-8.7181416,7.50954],[-8.7183126,7.509283],[-8.71836,7.5090343],[-8.7183034,7.508811],[-8.7178279,7.5086015],[-8.7176996,7.5084668],[-8.7176367,7.5082236],[-8.7173977,7.5079792],[-8.7172618,7.5077958],[-8.7171813,7.5075739],[-8.7172429,7.5073793],[-8.7175599,7.5069964],[-8.7178933,7.5072184],[-8.7182116,7.5071835],[-8.7184128,7.5070925],[-8.7186279,7.5068405],[-8.7187248,7.5065861],[-8.7188845,7.5063666],[-8.719077,7.5061197],[-8.7194745,7.5060099],[-8.7197337,7.5059638],[-8.7202922,7.5054213],[-8.7203261,7.5052055],[-8.7204633,7.504905],[-8.7208972,7.5045919],[-8.7210746,7.5041579],[-8.7212256,7.503775],[-8.7213325,7.5033809],[-8.7215551,7.5030043],[-8.7220281,7.5029544],[-8.722169,7.5027586],[-8.7222646,7.5025179],[-8.7222294,7.5024069],[-8.7219614,7.5022373],[-8.7219514,7.5020128],[-8.7222155,7.501802],[-8.7227024,7.5017471],[-8.7230722,7.5015289],[-8.7231024,7.5012595],[-8.7232961,7.5010537],[-8.72351,7.5007556],[-8.7236735,7.5005449],[-8.7239616,7.5003516],[-8.7241138,7.5000473],[-8.7246685,7.4997143],[-8.7251767,7.4997118],[-8.7256623,7.4993975],[-8.7258396,7.4991343],[-8.7260724,7.4988824],[-8.7263302,7.4989485],[-8.7266183,7.4991942],[-8.7269139,7.4991032],[-8.7272359,7.4986941],[-8.7271793,7.4981279],[-8.7270661,7.4974968],[-8.7269227,7.4973022],[-8.7269895,7.4968023],[-8.727026,7.4968072],[-8.7272752,7.4965729],[-8.7284672,7.4966452],[-8.7291166,7.496565],[-8.7296662,7.4962395],[-8.7300469,7.4958374],[-8.7306375,7.4942694],[-8.7311872,7.4934421],[-8.7317814,7.4927842],[-8.7324574,7.4924209],[-8.7329502,7.4918565],[-8.7332864,7.4914526],[-8.7339945,7.4909728],[-8.734304,7.4900375],[-8.7349531,7.4890872],[-8.7351644,7.4884112],[-8.735665,7.4878724],[-8.7355543,7.4867175],[-8.7354864,7.4864231],[-8.7357757,7.4854029],[-8.7359921,7.4845124],[-8.7363217,7.4839961],[-8.7365204,7.4836294],[-8.736684,7.4833076],[-8.7371444,7.483128],[-8.7373909,7.4831879],[-8.7376224,7.4836419],[-8.7384048,7.4840759],[-8.7389734,7.484238],[-8.7394212,7.484248],[-8.7398263,7.4840759],[-8.7401206,7.4839587],[-8.7402691,7.4837416],[-8.7400804,7.482674],[-8.7400401,7.4823173],[-8.740264,7.4819756],[-8.7403496,7.4813869],[-8.7404703,7.4803542],[-8.7404955,7.4799002],[-8.7404502,7.4794562],[-8.7408628,7.4794288],[-8.7413257,7.4794786],[-8.741693,7.4795684],[-8.7420604,7.4795884],[-8.7430843,7.4792965],[-8.7434013,7.4791419],[-8.7435221,7.4789423],[-8.7435699,7.4786156],[-8.743751,7.4783187],[-8.7437334,7.4780094],[-8.7439196,7.4775479],[-8.7443825,7.4762807],[-8.7445787,7.4758816],[-8.7448203,7.4756222],[-8.7450643,7.4755124],[-8.745658,7.475463],[-8.7463637,7.4748366],[-8.7468403,7.4744482],[-8.7472283,7.4742834],[-8.7473724,7.4741369],[-8.7474278,7.473668],[-8.7475312,7.4733493],[-8.7481261,7.4729646],[-8.7486433,7.4724994],[-8.748902,7.4721843],[-8.7494229,7.4717997],[-8.7494931,7.4713088],[-8.7496224,7.4708435],[-8.7497222,7.4703527],[-8.7499808,7.4693892],[-8.7501027,7.468858],[-8.7501286,7.4681583],[-8.7503096,7.467759],[-8.75079,7.4675172],[-8.75154,7.4671436],[-8.7519058,7.4667076],[-8.7520425,7.4661948],[-8.7525117,7.4657442],[-8.7529329,7.4655134],[-8.753306,7.4652276],[-8.7535868,7.4647551],[-8.7537937,7.464484],[-8.754045,7.4643631],[-8.7550666,7.4644656],[-8.7553954,7.4646488],[-8.7555062,7.4648631],[-8.7553917,7.4651544],[-8.755327,7.4654877],[-8.7553732,7.465887],[-8.7555986,7.4662149],[-8.7558461,7.4663321],[-8.7560826,7.4664036],[-8.7563264,7.4662314],[-8.7563893,7.4657167],[-8.7572501,7.4647312],[-8.7573222,7.4636597],[-8.7570284,7.4628281],[-8.7571042,7.4623793],[-8.7576436,7.4621046],[-8.7587317,7.4615606],[-8.7591529,7.4613389],[-8.7593469,7.4611484],[-8.7595205,7.460685],[-8.7600858,7.4600677],[-8.7603352,7.4597618],[-8.7604737,7.4595146],[-8.760616,7.4592435],[-8.7605994,7.4590548],[-8.7606566,7.4587636],[-8.7610335,7.458018],[-8.7611573,7.4574136],[-8.7612607,7.456745],[-8.7613919,7.4566003],[-8.7613605,7.456408],[-8.761535,7.4562329],[-8.7618354,7.4561008],[-8.7621385,7.4560775],[-8.7625016,7.4562458],[-8.7627577,7.4565282],[-8.7634709,7.4567769],[-8.7641136,7.4573157],[-8.7642886,7.4578519],[-8.7643931,7.4580462],[-8.7648268,7.4584633],[-8.7650123,7.4589036],[-8.765109,7.4595642],[-8.7653232,7.4600408],[-8.7656498,7.4605149],[-8.7658901,7.4608672],[-8.766201,7.4610589],[-8.7664256,7.461029],[-8.7665093,7.4608516],[-8.766525,7.4598491],[-8.7666869,7.4595979],[-8.7667209,7.4591342],[-8.7669795,7.4586886],[-8.7674289,7.4582457],[-8.7680768,7.4578234],[-8.7690722,7.4572432],[-8.7696051,7.4569453],[-8.7706972,7.45658],[-8.7712301,7.456251],[-8.7717082,7.4559194],[-8.7721733,7.4553159],[-8.7725678,7.4549044],[-8.7727768,7.4546864],[-8.7731007,7.4545413],[-8.7733724,7.4546035],[-8.7736729,7.4545387],[-8.7739315,7.4544947],[-8.7743056,7.454133],[-8.7746447,7.4538134],[-8.7756323,7.4538704],[-8.7760033,7.4538367],[-8.7770143,7.4535077],[-8.7777206,7.453351],[-8.7782368,7.4531573],[-8.7785947,7.4527429],[-8.7788063,7.4523362],[-8.7789552,7.4518958],[-8.7790284,7.451559],[-8.7789892,7.451287],[-8.7787462,7.4511938],[-8.7784667,7.4511445],[-8.7782734,7.4513259],[-8.7777587,7.4519683],[-8.77721,7.4523724],[-8.7769279,7.45259],[-8.7767581,7.4526289],[-8.7765491,7.4525408],[-8.7764315,7.4524268],[-8.7763176,7.452248],[-8.7764054,7.4519787],[-8.7769959,7.4514528],[-8.7769905,7.4505872],[-8.7767962,7.4502085],[-8.7764477,7.4500623],[-8.7757575,7.450142],[-8.7751562,7.4498114],[-8.7750204,7.4497367],[-8.7746747,7.4494388],[-8.7745818,7.4489827],[-8.7744142,7.4488398],[-8.7742627,7.4488105],[-8.7741279,7.4486071],[-8.7736199,7.448255],[-8.773191,7.4477367],[-8.772072,7.4472849],[-8.7720787,7.4467932],[-8.7729288,7.4462324],[-8.7736013,7.4457888],[-8.7736601,7.44575],[-8.7737186,7.4456798],[-8.7742029,7.4450989],[-8.7743503,7.4446869],[-8.7749132,7.4439693],[-8.7749802,7.4423613],[-8.7748663,7.4411852],[-8.7752683,7.4404145],[-8.7761328,7.4394975],[-8.7764946,7.439132],[-8.7772787,7.4376636],[-8.7778214,7.4369127],[-8.7782771,7.4360489],[-8.7783173,7.4354708],[-8.7778482,7.4353512],[-8.77754,7.4344675],[-8.7775132,7.433298],[-8.7769168,7.432308],[-8.7769771,7.4304142],[-8.7773725,7.429278],[-8.7775601,7.4280487],[-8.7777343,7.4268858],[-8.7776204,7.4258758],[-8.7780292,7.4244073],[-8.7776204,7.4232378],[-8.7777946,7.4221015],[-8.7777008,7.4212975],[-8.7778784,7.4207925],[-8.7782825,7.4206125],[-8.7785653,7.420726],[-8.7792219,7.4212657],[-8.7803904,7.4205908],[-8.7809508,7.4201214],[-8.7812725,7.4195964],[-8.7813662,7.4193495],[-8.7813296,7.4188858],[-8.781373,7.4185997],[-8.7811676,7.4183314],[-8.7808463,7.4182718],[-8.7804806,7.4180082],[-8.7802638,7.4176526],[-8.7802506,7.4172873],[-8.7801304,7.4168702],[-8.780207,7.4162208],[-8.7801671,7.4151214],[-8.7798509,7.4141241],[-8.7798535,7.413707],[-8.7796629,7.4131758],[-8.7795426,7.4128003],[-8.7795704,7.4125262],[-8.7796367,7.4121422],[-8.7799792,7.4117288],[-8.7804021,7.4113624],[-8.7811921,7.4110443],[-8.7816954,7.4108132],[-8.7823044,7.4103797],[-8.78274,7.4104994],[-8.7828057,7.4106836],[-8.7827222,7.4110722],[-8.7825235,7.411593],[-8.7824844,7.4119194],[-8.7825418,7.4121785],[-8.7821918,7.4125987],[-8.7818593,7.4133204],[-8.7815137,7.4136889],[-8.7815083,7.4138993],[-8.7816209,7.4141009],[-8.7822374,7.4140478],[-8.7836513,7.4148917],[-8.7841137,7.4148452],[-8.7847369,7.4138816],[-8.785118,7.413837],[-8.7854025,7.4137125],[-8.7857555,7.4137156],[-8.7863447,7.4144305],[-8.7865589,7.4150461],[-8.7867881,7.4153905],[-8.7872794,7.4154344],[-8.7874309,7.4153795],[-8.7885565,7.4155098],[-8.7889088,7.4157056],[-8.789689,7.415935],[-8.790117,7.4159547],[-8.7908482,7.4162407],[-8.7912347,7.41614],[-8.7915716,7.4154586],[-8.7921616,7.4146392],[-8.7929877,7.4141476],[-8.7941005,7.4134016],[-8.7947281,7.4130643],[-8.7949548,7.4130233],[-8.7949862,7.4125985],[-8.79542,7.4125441],[-8.7957854,7.4125416],[-8.7958978,7.4127881],[-8.7960573,7.4130208],[-8.796627,7.41343],[-8.796958,7.4138772],[-8.7982328,7.4152372],[-8.7987934,7.4155325],[-8.800042,7.4158952],[-8.800927,7.4161425],[-8.8018471,7.4161865],[-8.8023514,7.4160381],[-8.8027091,7.4155762],[-8.8025482,7.4149847],[-8.8019042,7.4141293],[-8.8016249,7.4135686],[-8.8015495,7.4132096],[-8.8012189,7.4126124],[-8.8005687,7.4119163],[-8.8006384,7.4108051],[-8.8004693,7.4098878],[-8.8004843,7.4090839],[-8.8007588,7.4083813],[-8.8009693,7.4081873],[-8.8012978,7.408163],[-8.8018247,7.4079527],[-8.8020703,7.4078245],[-8.8029657,7.4075323],[-8.8031883,7.4073684],[-8.8034855,7.406925],[-8.8039691,7.4066757],[-8.8045385,7.4063533],[-8.8051114,7.4061264],[-8.8057556,7.4059991],[-8.8059754,7.4059187],[-8.80648,7.4055704],[-8.8074323,7.4052012],[-8.8086816,7.4048368],[-8.8092367,7.4042915],[-8.80953,7.4041814],[-8.8098923,7.4042072],[-8.8100611,7.4044306],[-8.8101093,7.404721],[-8.8100753,7.4050206],[-8.809935,7.4053724],[-8.8097509,7.4055124],[-8.8093371,7.4056589],[-8.8091117,7.4059081],[-8.8090119,7.4061096],[-8.809119,7.4064027],[-8.8094404,7.4064869],[-8.8097244,7.4063827],[-8.8101423,7.4064371],[-8.8106086,7.406941],[-8.8110534,7.4072332],[-8.8113205,7.4074085],[-8.8118117,7.4078982],[-8.8121853,7.4079189],[-8.8125119,7.4079345],[-8.8128185,7.4080772],[-8.812967,7.4080386],[-8.8131141,7.4080003],[-8.8134355,7.4079655],[-8.8137994,7.4078648],[-8.8140803,7.4079581],[-8.8142039,7.4079949],[-8.8143758,7.4078647],[-8.8146491,7.4072603],[-8.8155712,7.4064024],[-8.8157457,7.4061121],[-8.8158552,7.4055914],[-8.8157934,7.4050128],[-8.8156582,7.4047043],[-8.8153538,7.4043354],[-8.8152096,7.4040356],[-8.8153065,7.4035743],[-8.8155398,7.4030813],[-8.8159422,7.4025348],[-8.816277,7.4020486],[-8.8168484,7.4016059],[-8.8168991,7.4012304],[-8.8168011,7.4008716],[-8.8169397,7.4003485],[-8.8168354,7.3994458],[-8.8169402,7.3984298],[-8.8169803,7.3975217],[-8.8171054,7.3965191],[-8.8172035,7.3958518],[-8.8173257,7.3953146],[-8.8176875,7.3948116],[-8.8178397,7.3943018],[-8.8181677,7.3939263],[-8.8189183,7.3933562],[-8.8193174,7.392823],[-8.8204839,7.3922932],[-8.821008,7.3920954],[-8.8214664,7.3918912],[-8.8218371,7.3917306],[-8.8222829,7.3913954],[-8.8227354,7.3908932],[-8.8231113,7.390241],[-8.8235103,7.3893826],[-8.8237571,7.3882525],[-8.8242846,7.3872365],[-8.8247411,7.3855866],[-8.8248527,7.3844867],[-8.825113,7.3839804],[-8.8259449,7.3837456],[-8.8266752,7.3836853],[-8.8275544,7.3834975],[-8.8278148,7.3833332],[-8.8278587,7.3828638],[-8.8280041,7.3823709],[-8.8282205,7.3822501],[-8.8285216,7.3814173],[-8.8285012,7.3809053],[-8.8282617,7.3805717],[-8.8279703,7.3798222],[-8.8280447,7.3793427],[-8.8287379,7.3789235],[-8.8293634,7.3785379],[-8.8302392,7.3783836],[-8.8305312,7.3782537],[-8.8308534,7.3778407],[-8.8309459,7.3772837],[-8.8309662,7.3765996],[-8.8311441,7.3757801],[-8.8312403,7.3751877],[-8.8314745,7.3743236],[-8.8318387,7.3734995],[-8.8322087,7.3727945],[-8.8333659,7.3712295],[-8.8342793,7.3703759],[-8.8353743,7.3697641],[-8.8359163,7.3693543],[-8.8361857,7.3688563],[-8.8365965,7.3684539],[-8.8371004,7.3681488],[-8.8373929,7.3680918],[-8.8375281,7.3675351],[-8.8376608,7.3664995],[-8.8378097,7.3655112],[-8.8380092,7.364978],[-8.8383034,7.3646762],[-8.8389649,7.3642539],[-8.8399225,7.3637067],[-8.8403188,7.3633615],[-8.8407312,7.3628787],[-8.8414779,7.3614256],[-8.8418881,7.3602967],[-8.8420567,7.3597667],[-8.8427398,7.3577613],[-8.8429866,7.3570349],[-8.8431895,7.3566077],[-8.8435783,7.356383],[-8.8439401,7.3563058],[-8.8444372,7.3564401],[-8.8449005,7.3566145],[-8.8452386,7.3568827],[-8.8455722,7.3570837],[-8.8457988,7.3570703],[-8.8460321,7.3570434],[-8.846333,7.3568556],[-8.8471547,7.3558965],[-8.8475041,7.3554222],[-8.8483173,7.354433],[-8.8488076,7.3540004],[-8.848948,7.3539383],[-8.8490758,7.3537315],[-8.8492026,7.3535822],[-8.8492289,7.3534589],[-8.8494565,7.353193],[-8.8495899,7.352885],[-8.8500662,7.352268],[-8.8503789,7.3518131],[-8.8509791,7.3512795],[-8.8514411,7.3508003],[-8.8517136,7.35039],[-8.8521273,7.3498992],[-8.8527704,7.3496359],[-8.8535972,7.3489437],[-8.8536109,7.3485721],[-8.8535212,7.3479],[-8.8533634,7.3472455],[-8.8532553,7.3467644],[-8.8522997,7.3469718],[-8.8519495,7.3468293],[-8.8522205,7.3463728],[-8.852407,7.3457895],[-8.8519789,7.3453288],[-8.8518547,7.3450781],[-8.8510728,7.3454907],[-8.850664,7.3456426],[-8.8504034,7.3454339],[-8.8506042,7.3450378],[-8.8509437,7.3443524],[-8.8510513,7.3436552],[-8.8509605,7.3431312],[-8.8508129,7.3424999],[-8.8504894,7.3423108],[-8.850138,7.342287],[-8.8498343,7.3423297],[-8.8492844,7.3415447],[-8.8489233,7.3414167],[-8.8483061,7.3413523],[-8.848022,7.3412316],[-8.8472173,7.3413154],[-8.8466965,7.3411142],[-8.8467946,7.3408862],[-8.8471429,7.3406413],[-8.84741,7.3400176],[-8.847596,7.3395414],[-8.847853,7.3392932],[-8.8481776,7.3391524],[-8.8481573,7.338817],[-8.8473965,7.3386426],[-8.8471767,7.3382737],[-8.8471158,7.3379082],[-8.8471801,7.3375728],[-8.8488539,7.3372508],[-8.8487998,7.336892],[-8.8484752,7.3363755],[-8.8480387,7.3360922],[-8.8473501,7.3357987],[-8.8466071,7.3353236],[-8.8456029,7.3351102],[-8.8449525,7.3346809],[-8.8443595,7.3347141],[-8.8438742,7.3345671],[-8.8433577,7.3345647],[-8.8433219,7.3343323],[-8.8431019,7.3336351],[-8.8432143,7.3330779],[-8.8433142,7.3325939],[-8.8431519,7.3320975],[-8.8431316,7.3311786],[-8.8429422,7.3304475],[-8.8429118,7.3293642],[-8.8436033,7.328779],[-8.8443049,7.3284252],[-8.8448595,7.3279523],[-8.8452492,7.32721],[-8.8452097,7.3266136],[-8.8451032,7.3259727],[-8.8450364,7.3254184],[-8.844988,7.3247126],[-8.8448584,7.3239697],[-8.8448152,7.3233792],[-8.8448318,7.3230408],[-8.8449208,7.3227172],[-8.8450533,7.3223968],[-8.8453204,7.3220916],[-8.8456619,7.3217696],[-8.8459426,7.3213403],[-8.846257,7.3209748],[-8.8468488,7.3204616],[-8.8475014,7.3200223],[-8.8479264,7.3198314],[-8.8481811,7.3195863],[-8.8483153,7.3194075],[-8.8483129,7.3192811],[-8.8483163,7.3191369],[-8.8482926,7.3190396],[-8.8481777,7.3188786],[-8.8478903,7.3186875],[-8.8474101,7.3186506],[-8.8468116,7.3188652],[-8.846301,7.3191268],[-8.8456957,7.3194186],[-8.8453779,7.3196299],[-8.8450296,7.3197808],[-8.8447185,7.3198144],[-8.8441741,7.3198613],[-8.8432442,7.3197674],[-8.8428419,7.3195171],[-8.8426162,7.3192313],[-8.8425874,7.318998],[-8.8425511,7.3187478],[-8.8429433,7.3185869],[-8.8434065,7.3184862],[-8.8440374,7.318198],[-8.8443973,7.3178758],[-8.84459,7.3175673],[-8.8445156,7.3172353],[-8.8443094,7.3169871],[-8.8441302,7.3166014],[-8.8438174,7.3162693],[-8.8435418,7.315991],[-8.8431952,7.3158853],[-8.8426863,7.3160782],[-8.8421233,7.3163565],[-8.8416161,7.3165511],[-8.8409956,7.3166098],[-8.8405729,7.3165762],[-8.8402821,7.3164991],[-8.8398274,7.3165192],[-8.839217,7.3166685],[-8.8386215,7.3165788],[-8.8382134,7.3163216],[-8.8379733,7.3161264],[-8.8376853,7.3157835],[-8.8374788,7.3153597],[-8.8372388,7.3150168],[-8.8371475,7.3145882],[-8.8369411,7.3140025],[-8.8367875,7.3136265],[-8.8366489,7.3134823],[-8.8363697,7.3127833],[-8.8362769,7.3122179],[-8.8363124,7.3117249],[-8.8365001,7.3113207],[-8.8368365,7.3110641],[-8.837173,7.3108361],[-8.8377429,7.3106736],[-8.8384116,7.3101981],[-8.8389745,7.3099784],[-8.8396014,7.3097908],[-8.8403858,7.3097372],[-8.841008,7.3096164],[-8.8414003,7.3093347],[-8.841877,7.3086539],[-8.8421374,7.3079529],[-8.8422118,7.3074968],[-8.8420258,7.3068998],[-8.8416366,7.3067761],[-8.8411838,7.306893],[-8.8404535,7.307054],[-8.8397907,7.307054],[-8.8393714,7.3071077],[-8.838871,7.3070943],[-8.8385599,7.3067857],[-8.838338,7.3064483],[-8.838173,7.3061803],[-8.8381132,7.3057867],[-8.8379326,7.3055863],[-8.8379541,7.3053088],[-8.8381789,7.3048606],[-8.8384873,7.304538],[-8.8385638,7.3043317],[-8.8391975,7.30404],[-8.8403834,7.3040068],[-8.8411055,7.3039997],[-8.8416267,7.304002],[-8.842148,7.3042582],[-8.8427577,7.3046945],[-8.843243,7.3049744],[-8.8436328,7.3051878],[-8.8439149,7.3055199],[-8.8440655,7.3059088],[-8.8442783,7.3062788],[-8.8445437,7.3065373],[-8.8448928,7.3065847],[-8.8452562,7.306459],[-8.8455408,7.3062171],[-8.8456412,7.3058637],[-8.8455049,7.305712],[-8.8452036,7.3056218],[-8.8450387,7.3052234],[-8.8450339,7.3048036],[-8.8451152,7.3043341],[-8.8451176,7.3040827],[-8.8449478,7.303606],[-8.8445653,7.3033617],[-8.8441946,7.3033997],[-8.8437547,7.303568],[-8.8433076,7.3036131],[-8.8429274,7.3034234],[-8.8425209,7.3031672],[-8.8423727,7.302968],[-8.8423512,7.3027404],[-8.8424827,7.3024368],[-8.8426907,7.3019079],[-8.8428007,7.30173],[-8.8429322,7.3012794],[-8.843047,7.3007174],[-8.84298,7.3002834],[-8.8428294,7.2999679],[-8.8423942,7.2994723],[-8.8419089,7.2990169],[-8.8415885,7.298628],[-8.8411653,7.2983078],[-8.841029,7.2982746],[-8.840864,7.2980374],[-8.8406153,7.2978619],[-8.8403475,7.2975607],[-8.8399674,7.2972026],[-8.8398048,7.2968872],[-8.8393098,7.2966477],[-8.8389584,7.296382],[-8.8387719,7.2960121],[-8.8387934,7.2955211],[-8.8389225,7.2948832],[-8.8392859,7.2935052],[-8.8394916,7.2930428],[-8.8397067,7.2925115],[-8.8398143,7.2919376],[-8.8397952,7.2914609],[-8.8396757,7.2910008],[-8.8392477,7.2907755],[-8.8387121,7.2908395],[-8.8382769,7.2911383],[-8.8377437,7.2916174],[-8.8372201,7.2921036],[-8.8369571,7.2921724],[-8.8365124,7.2921605],[-8.8363378,7.2919328],[-8.8362781,7.2916506],[-8.8365411,7.2912854],[-8.8366702,7.2909676],[-8.8367371,7.2903912],[-8.8365482,7.2898932],[-8.8365698,7.2897058],[-8.8364287,7.289388],[-8.8364717,7.2889611],[-8.8364885,7.2883967],[-8.8363617,7.2880978],[-8.8360533,7.2876875],[-8.8361609,7.287384],[-8.8363665,7.2869357],[-8.8367084,7.2861673],[-8.8370695,7.2852874],[-8.8373806,7.2847105],[-8.8378269,7.2839793],[-8.8380129,7.2835969],[-8.8381435,7.2829206],[-8.8380837,7.2823229],[-8.8377753,7.2814098],[-8.8378375,7.280703],[-8.8379475,7.2801623],[-8.8379331,7.2795267],[-8.8376821,7.2789195],[-8.837448,7.2785049],[-8.8373258,7.2782981],[-8.8372134,7.2779495],[-8.8371728,7.2774917],[-8.8371321,7.2769415],[-8.8372852,7.2764553],[-8.8376486,7.2760971],[-8.8380527,7.2758339],[-8.83888,7.2756963],[-8.8391358,7.2755018],[-8.8394657,7.2753595],[-8.8399535,7.2748614],[-8.8404389,7.274361],[-8.8409147,7.2737799],[-8.8415005,7.2732605],[-8.8422991,7.2725751],[-8.8428705,7.2723165],[-8.8433416,7.2721766],[-8.8441449,7.2720841],[-8.8447068,7.2719632],[-8.8454552,7.2719608],[-8.8461223,7.2721221],[-8.8469257,7.2722098],[-8.8475401,7.2721932],[-8.8481283,7.2718422],[-8.8485181,7.2713536],[-8.8489341,7.2708081],[-8.8493214,7.2702934],[-8.8494697,7.2699519],[-8.8494912,7.2695297],[-8.849178,7.2691834],[-8.848738,7.2692688],[-8.8484894,7.2696483],[-8.8482407,7.270227],[-8.8481235,7.2705543],[-8.8479657,7.2710121],[-8.8475425,7.2713607],[-8.8470333,7.2714058],[-8.8465598,7.2711496],[-8.8463303,7.2707868],[-8.8461438,7.2703527],[-8.8459382,7.2696459],[-8.8457588,7.269136],[-8.8454504,7.2686],[-8.8451109,7.2681114],[-8.8450463,7.2679857],[-8.8452974,7.2677129],[-8.845393,7.2676157],[-8.8456441,7.2674568],[-8.8459764,7.2672149],[-8.8463423,7.2668496],[-8.8465407,7.2666219],[-8.8468587,7.2664298],[-8.8472867,7.2663681],[-8.8482748,7.2658745],[-8.8495124,7.2655558],[-8.8501211,7.2655525],[-8.8505066,7.2654485],[-8.8510746,7.265103],[-8.8516393,7.2645194],[-8.8521127,7.2637412],[-8.8524069,7.2633957],[-8.853073,7.2628959],[-8.8534281,7.2626745],[-8.8539928,7.2627718],[-8.8543005,7.262963],[-8.8547941,7.2633789],[-8.8553791,7.2639961],[-8.8558255,7.2647106],[-8.8563158,7.2653378],[-8.8567756,7.2659416],[-8.8571104,7.2663508],[-8.8573403,7.2669915],[-8.8574756,7.2676153],[-8.8576988,7.2677931],[-8.8581282,7.2678535],[-8.8589702,7.267508],[-8.8600218,7.2671558],[-8.8610768,7.266817],[-8.8619289,7.2666829],[-8.8624327,7.2665487],[-8.8626322,7.2661999],[-8.8625274,7.2657537],[-8.8621858,7.2653445],[-8.8616854,7.2647542],[-8.8612796,7.2642376],[-8.8610801,7.2638251],[-8.8609821,7.2631844],[-8.8610294,7.262745],[-8.8613371,7.2625236],[-8.8621588,7.2620238],[-8.8624631,7.2617555],[-8.8626829,7.2614268],[-8.863021,7.260558],[-8.8633457,7.2597463],[-8.8640828,7.2589882],[-8.8644345,7.2587467],[-8.8651817,7.2586595],[-8.8661623,7.2587366],[-8.8666884,7.2587936],[-8.8676926,7.2595336],[-8.8683429,7.2600459],[-8.8688785,7.2604728],[-8.869548,7.2606246],[-8.8700836,7.2604301],[-8.8703562,7.2599605],[-8.8705857,7.2590972],[-8.8708296,7.2583239],[-8.871083,7.2577689],[-8.871236,7.2571617],[-8.8713556,7.256436],[-8.8714656,7.2560707],[-8.871676,7.2559331],[-8.8719342,7.2560043],[-8.8720251,7.2564549],[-8.8721255,7.2572044],[-8.8725798,7.2574132],[-8.8733688,7.2575982],[-8.8737275,7.2576883],[-8.8745691,7.2580203],[-8.8753916,7.2583714],[-8.8761089,7.2587698],[-8.8767545,7.2589975],[-8.8775483,7.259026],[-8.878641,7.2589897],[-8.8796897,7.2590773],[-8.8806831,7.2594222],[-8.8817483,7.2600628],[-8.8823554,7.2603256],[-8.8831722,7.2606158],[-8.8837904,7.2611413],[-8.8843754,7.2616724],[-8.8851701,7.2623951],[-8.8856889,7.262625],[-8.8861498,7.2626332],[-8.8866024,7.2627509],[-8.8870217,7.2630048],[-8.8872812,7.2634298],[-8.887608,7.2635993],[-8.8881969,7.2637836],[-8.8889391,7.2637679],[-8.8896138,7.2639651],[-8.8901489,7.2641589],[-8.8905021,7.2642866],[-8.8910836,7.2642421],[-8.8915129,7.2641782],[-8.892036,7.2642516],[-8.8923683,7.2644991],[-8.8926627,7.2647953],[-8.8929202,7.2650685],[-8.8932863,7.265182],[-8.893511,7.2651518],[-8.8940183,7.2649951],[-8.8943071,7.2649776],[-8.8948204,7.2650541],[-8.8951302,7.2653508],[-8.8952906,7.2654422],[-8.8954955,7.2653996],[-8.8956769,7.2653861],[-8.8958526,7.2650609],[-8.8959657,7.2646873],[-8.8961433,7.2640679],[-8.8966487,7.2636653],[-8.8970362,7.2633477],[-8.8971576,7.2627592],[-8.8972514,7.2622172],[-8.8976885,7.2620585],[-8.8979734,7.2618997],[-8.8982036,7.2616558],[-8.8985666,7.2613655],[-8.8987968,7.2611874],[-8.8992066,7.2609242],[-8.8993393,7.2608041],[-8.8997608,7.2606958],[-8.9002758,7.2605766],[-8.9006375,7.2604333],[-8.9008975,7.2598034],[-8.9007048,7.2587962],[-8.9006847,7.2584982],[-8.9011213,7.2580597],[-8.902032,7.2576656],[-8.9025949,7.2574958],[-8.9035001,7.2569374],[-8.9042231,7.2564173],[-8.9046205,7.2561216],[-8.9050853,7.2558932],[-8.9054319,7.2560776],[-8.9054748,7.2563199],[-8.9055344,7.2566823],[-8.9057674,7.2578603],[-8.9056481,7.2585453],[-8.9056498,7.2591624],[-8.9059909,7.2595683],[-8.9062481,7.2601807],[-8.9062752,7.2608423],[-8.9061734,7.2618868],[-8.9059937,7.2623245],[-8.9054415,7.2630828],[-8.9052535,7.2634154],[-8.9052733,7.2637469],[-8.9053717,7.2640639],[-8.9055592,7.2641692],[-8.9064689,7.2641576],[-8.9080115,7.2641604],[-8.909176,7.2643],[-8.910037,7.2639687],[-8.910553,7.2638702],[-8.9108014,7.2639113],[-8.9109615,7.2640317],[-8.9110884,7.2642425],[-8.9108235,7.2645273],[-8.9106965,7.2650664],[-8.9108937,7.2654489],[-8.9112561,7.2660057],[-8.911276,7.2663147],[-8.9112899,7.2667477],[-8.9110387,7.2673218],[-8.9106966,7.2678631],[-8.9106717,7.2687291],[-8.9107122,7.2692181],[-8.9109509,7.2698467],[-8.911111,7.2703373],[-8.911225,7.270707],[-8.9110459,7.2710219],[-8.9105317,7.2714246],[-8.9099122,7.2720717],[-8.9090078,7.2726862],[-8.9086572,7.2728722],[-8.9085318,7.2735301],[-8.908489,7.2741149],[-8.9083346,7.2755293],[-8.9083723,7.2759348],[-8.9085742,7.276451],[-8.9089417,7.2764838],[-8.9101508,7.2762907],[-8.9114444,7.2762831],[-8.9116427,7.2762339],[-8.9116674,7.2759472],[-8.9117722,7.2747018],[-8.9117108,7.2740555],[-8.9117459,7.2737432],[-8.9119685,7.2736669],[-8.9122037,7.2737293],[-8.9125599,7.2739483],[-8.9132327,7.2742922],[-8.9140275,7.2749097],[-8.9145558,7.2753045],[-8.9149094,7.2754842],[-8.9149259,7.2757096],[-8.9148433,7.2759553],[-8.9146079,7.2762175],[-8.9138356,7.2767911],[-8.912942,7.2775197],[-8.9126751,7.2778357],[-8.9124934,7.2780733],[-8.9128646,7.2781834],[-8.9132972,7.2782356],[-8.9139171,7.2783637],[-8.9148227,7.2785034],[-8.9153182,7.27861],[-8.9157802,7.278695],[-8.916185,7.2788824],[-8.9164746,7.2791784],[-8.9166502,7.2795081],[-8.916805,7.2799372],[-8.9167843,7.2803628],[-8.9164498,7.2807361],[-8.9156207,7.2814161],[-8.9152315,7.2817725],[-8.9149414,7.2821601],[-8.9144666,7.2829419],[-8.9143407,7.2834424],[-8.9142899,7.2840994],[-8.9144283,7.2851327],[-8.9142306,7.2859023],[-8.9141444,7.2866137],[-8.914275,7.2873037],[-8.9146493,7.2877637],[-8.9149188,7.2882808],[-8.9149874,7.2892724],[-8.9149089,7.2898072],[-8.9145732,7.2904844],[-8.9146922,7.2910605],[-8.9149625,7.2914903],[-8.9152348,7.2921884],[-8.9151019,7.2932211],[-8.9153011,7.2934971],[-8.9157834,7.2939211],[-8.9160948,7.2941855],[-8.9163473,7.2945839],[-8.9164324,7.2950644],[-8.9165539,7.295292],[-8.9168237,7.2955084],[-8.9172137,7.2956001],[-8.9176461,7.2956277],[-8.9180892,7.2955012],[-8.9183929,7.2951652],[-8.9184804,7.2948413],[-8.9185236,7.2946364],[-8.918439,7.294444],[-8.9179974,7.2939956],[-8.9177116,7.2936975],[-8.9176416,7.2934555],[-8.9176665,7.2931147],[-8.9179977,7.2925522],[-8.9184817,7.2923162],[-8.918671,7.2922509],[-8.918713,7.2920619],[-8.9187614,7.2918273],[-8.91828,7.2912629],[-8.918206,7.2910839],[-8.9183313,7.290824],[-8.9194962,7.290611],[-8.9200395,7.2906476],[-8.9203753,7.2908033],[-8.920672,7.2910079],[-8.921104,7.2910179],[-8.9214436,7.2908722],[-8.9221537,7.2900666],[-8.9223647,7.2899071],[-8.9226941,7.2899204],[-8.9228594,7.2901637],[-8.922968,7.2904259],[-8.9231289,7.2909578],[-8.9233333,7.2911342],[-8.9236294,7.291134],[-8.9239189,7.2910433],[-8.9244098,7.2902713],[-8.9248204,7.2898111],[-8.925612,7.2895289],[-8.926234,7.2892969],[-8.92675,7.2893069],[-8.927341,7.2894429],[-8.927899,7.2896839],[-8.9281806,7.2898767],[-8.9285103,7.2898573],[-8.928858,7.289717],[-8.9292998,7.2891828],[-8.929911,7.2885569],[-8.930216,7.2877879],[-8.930646,7.2863049],[-8.930783,7.2860309],[-8.9310405,7.2857713],[-8.9317911,7.2856184],[-8.9324349,7.2856881],[-8.9338218,7.2861352],[-8.9343347,7.286275],[-8.9349517,7.2866244],[-8.935252,7.2870879],[-8.935516,7.2874249],[-8.935759,7.2878559],[-8.9360191,7.2879679],[-8.9365047,7.2879477],[-8.9371693,7.2877203],[-8.9380188,7.2874112],[-8.9387032,7.287171],[-8.9393894,7.2870071],[-8.9397926,7.2870171],[-8.9402069,7.2871239],[-8.940353,7.2875349],[-8.940491,7.2879869],[-8.940614,7.2885201],[-8.9405908,7.2892809],[-8.940503,7.2897959],[-8.940409,7.2902489],[-8.940473,7.2905009],[-8.940627,7.2905895],[-8.9408553,7.2905685],[-8.9411661,7.2903243],[-8.9417521,7.2897438],[-8.942389,7.2893939],[-8.942926,7.2891829],[-8.943885,7.2889609],[-8.9441421,7.2888117],[-8.9444273,7.2885569],[-8.9445305,7.2875741],[-8.9444685,7.2870252],[-8.9444107,7.2866278],[-8.9442249,7.2859396],[-8.9441381,7.285661],[-8.9441505,7.2852964],[-8.9446378,7.2846983],[-8.9447948,7.2844034],[-8.9448072,7.2841166],[-8.9444974,7.2837807],[-8.9440968,7.2835841],[-8.9427085,7.2826081],[-8.9422551,7.2823477],[-8.9416041,7.2821921],[-8.9406383,7.2821976],[-8.9400795,7.28177],[-8.9394868,7.2811835],[-8.9389536,7.2804128],[-8.9385174,7.2798398],[-8.9376036,7.2789483],[-8.9374493,7.2786579],[-8.9374683,7.2780209],[-8.9374002,7.2775201],[-8.9375592,7.2770951],[-8.9379309,7.2766609],[-8.9386041,7.2761283],[-8.9392112,7.2756244],[-8.9400909,7.275227],[-8.940827,7.2750893],[-8.9414454,7.2750514],[-8.9418873,7.2752188],[-8.942542,7.2753556],[-8.9431991,7.2756756],[-8.9436012,7.2761693],[-8.9439027,7.2765912],[-8.9443859,7.2773368],[-8.9446466,7.277745],[-8.9447824,7.2779759],[-8.9451169,7.2779636],[-8.9453317,7.2777956],[-8.9455051,7.277599],[-8.9456021,7.277283],[-8.9452501,7.276183],[-8.9447298,7.2748148],[-8.9440018,7.2735884],[-8.9437706,7.2732115],[-8.9436188,7.2724838],[-8.9435558,7.2695941],[-8.9435341,7.2680606],[-8.9433116,7.2671367],[-8.9432456,7.2664832],[-8.9434402,7.2657637],[-8.9436095,7.2654524],[-8.9438821,7.2652393],[-8.9442992,7.2651902],[-8.9451128,7.2656408],[-8.9458314,7.2658252],[-8.9464137,7.2658375],[-8.9469919,7.265735],[-8.9474709,7.2654811],[-8.9479376,7.2650222],[-8.9484568,7.2644061],[-8.9487677,7.2638408],[-8.9492427,7.2630804],[-8.9495359,7.262896],[-8.9499819,7.2628878],[-8.950556,7.262982],[-8.9509813,7.2631418],[-8.9514893,7.2632197],[-8.9517949,7.2632975],[-8.951894,7.2635023],[-8.9518858,7.2637195],[-8.9517743,7.2639939],[-8.9513076,7.2643012],[-8.9505477,7.2646453],[-8.9497672,7.2651083],[-8.9484952,7.2660546],[-8.9478798,7.2664438],[-8.9474751,7.2666978],[-8.9472108,7.2670296],[-8.9465639,7.2684435],[-8.9462196,7.2692828],[-8.9458314,7.270479],[-8.9457901,7.2707658],[-8.9459894,7.2709004],[-8.9464426,7.2708805],[-8.9473966,7.2707208],[-8.9487925,7.2706839],[-8.9490857,7.2703956],[-8.9491697,7.2698],[-8.9494811,7.2682023],[-8.9496433,7.2675704],[-8.9500433,7.2673438],[-8.9507625,7.2673696],[-8.9515719,7.2672099],[-8.9523272,7.2671535],[-8.9524956,7.267641],[-8.952479,7.2683446],[-8.952307,7.2685618],[-8.9521625,7.2686847],[-8.9517773,7.2687383],[-8.9509648,7.2691025],[-8.9503082,7.269377],[-8.9499943,7.2696761],[-8.949771,7.2700444],[-8.9496098,7.2704711],[-8.9497336,7.2723451],[-8.9497821,7.2727578],[-8.949827,7.2729703],[-8.9500284,7.273062],[-8.9502132,7.2729206],[-8.9510639,7.2726789],[-8.9515926,7.2725355],[-8.9520236,7.2724373],[-8.9524903,7.2724772],[-8.9531351,7.2724757],[-8.9544654,7.2730758],[-8.9562676,7.2742684],[-8.957808,7.274674],[-8.9587868,7.2744692],[-8.9594682,7.2741537],[-8.9599349,7.2737359],[-8.9604842,7.2733836],[-8.9613102,7.2731337],[-8.9619792,7.2725233],[-8.9623757,7.2720521],[-8.9626524,7.2716712],[-8.9631727,7.2706389],[-8.9641185,7.2692254],[-8.9646678,7.2686314],[-8.9651096,7.2681972],[-8.9655763,7.2678653],[-8.966043,7.2675827],[-8.9665675,7.267337],[-8.9672572,7.2670747],[-8.9674224,7.2666568],[-8.9677321,7.2659727],[-8.9675587,7.2656408],[-8.9670466,7.2655302],[-8.9664519,7.2654443],[-8.9658778,7.2654607],[-8.9653161,7.2653622],[-8.9640689,7.2649894],[-8.9634123,7.2647847],[-8.9629621,7.2645388],[-8.9621114,7.2639161],[-8.9619255,7.2637645],[-8.9614836,7.2636684],[-8.9611774,7.2635249],[-8.9609581,7.2634117],[-8.9606624,7.2631051],[-8.9605365,7.2627138],[-8.9605509,7.2624476],[-8.9605158,7.262292],[-8.9607099,7.2620522],[-8.9612861,7.2614664],[-8.9614802,7.2611509],[-8.9617878,7.2608007],[-8.9621409,7.2604914],[-8.962492,7.2602906],[-8.9628224,7.2604422],[-8.9632808,7.2606839],[-8.9635265,7.2606696],[-8.9637351,7.2605917],[-8.9639189,7.2604053],[-8.964051,7.260094],[-8.9641295,7.2595942],[-8.9641728,7.2591313],[-8.9641233,7.2578654],[-8.9641543,7.2573962],[-8.9641708,7.2572016],[-8.9642348,7.2570502],[-8.9643711,7.2570419],[-8.9645879,7.2571033],[-8.9648419,7.2573368],[-8.9652363,7.2578327],[-8.9655997,7.2580621],[-8.9658909,7.2583139],[-8.9663534,7.2585413],[-8.9673116,7.2586273],[-8.9678691,7.2585249],[-8.96828,7.2583037],[-8.9686662,7.2579432],[-8.968916,7.2575294],[-8.9690833,7.2569948],[-8.968824,7.2565073],[-8.9683812,7.2562717],[-8.9681272,7.2559828],[-8.9678071,7.2557247],[-8.9676667,7.2555569],[-8.96777,7.255227],[-8.9680322,7.2548501],[-8.9684142,7.2544609],[-8.968883,7.2542581],[-8.9694013,7.2539303],[-8.9696078,7.2536292],[-8.9696532,7.2533261],[-8.9698714,7.2531382],[-8.9702845,7.2530029],[-8.9707755,7.2529913],[-8.9713405,7.2531691],[-8.9719601,7.2535364],[-8.9725525,7.2536021],[-8.9733591,7.2534629],[-8.9738696,7.2532812],[-8.9742047,7.2530068],[-8.9743577,7.2528687],[-8.9746334,7.2527092],[-8.9747892,7.2524656],[-8.9749646,7.2524269],[-8.9751994,7.2524018],[-8.9753426,7.2525121],[-8.9753231,7.2527555],[-8.9753075,7.2530222],[-8.9753816,7.2534938],[-8.9756504,7.2538301],[-8.9762329,7.2540622],[-8.9770005,7.2542942],[-8.9780683,7.2543792],[-8.9793046,7.2543824],[-8.9819428,7.2540689],[-8.9828212,7.2540324],[-8.9830223,7.2540147],[-8.9833847,7.2537209],[-8.9836536,7.2530522],[-8.9838142,7.2516344],[-8.9838177,7.2510864],[-8.9839018,7.2503711],[-8.9844703,7.2495446],[-8.9854044,7.2483517],[-8.9860026,7.2481574],[-8.9865916,7.2492359],[-8.9867734,7.2496293],[-8.9868017,7.2501274],[-8.9868283,7.2508319],[-8.9868009,7.2511842],[-8.9869704,7.2515009],[-8.9873933,7.2519132],[-8.988578,7.2528774],[-8.9894676,7.2537172],[-8.9900291,7.2544716],[-8.9903778,7.2547435],[-8.9907906,7.2548605],[-8.9912623,7.2548633],[-8.991574,7.2548048],[-8.9924248,7.2543117],[-8.9936098,7.2531919],[-8.9940506,7.2526683],[-8.9948233,7.2521147],[-8.9953854,7.2520057],[-8.9961111,7.2520205],[-8.9965189,7.2522031],[-8.9967716,7.2523479],[-8.9972124,7.2526599],[-8.9975017,7.2526153],[-8.9977151,7.2524454],[-8.9980352,7.2520805],[-8.9984339,7.2515875],[-8.9987007,7.2509607],[-8.9989534,7.2504036],[-8.9993493,7.2498939],[-8.9996694,7.2494733],[-9.0012363,7.2481641],[-9.0020096,7.2476111],[-9.0032341,7.2470657],[-9.0039179,7.2468984],[-9.0058173,7.2463044],[-9.0070095,7.2459096],[-9.0083068,7.2458548],[-9.0085033,7.2456293],[-9.0093401,7.2452977],[-9.0101011,7.2449384],[-9.0106908,7.2445345],[-9.0111204,7.2439133],[-9.0113759,7.2435568],[-9.0116792,7.2435179],[-9.0125861,7.2438409],[-9.0133134,7.2439551],[-9.0140759,7.2440024],[-9.0145921,7.2440969],[-9.0149932,7.2444081],[-9.0150488,7.2448966],[-9.0152235,7.2454954],[-9.0151664,7.2462233],[-9.0153023,7.2468711],[-9.0158317,7.2474565],[-9.0162233,7.2481946],[-9.0164689,7.2485081],[-9.016866,7.2486893],[-9.0171281,7.2486736],[-9.0175721,7.2482255],[-9.017684,7.2480275],[-9.0179978,7.247669],[-9.0184068,7.2477557],[-9.0187404,7.2481142],[-9.0190382,7.2484057],[-9.0193718,7.2486381],[-9.0196577,7.2487208],[-9.0199595,7.2485713],[-9.0200548,7.2483387],[-9.0197967,7.2479133],[-9.019471,7.2472712],[-9.0194353,7.2468221],[-9.0193757,7.2459791],[-9.0196537,7.2454472],[-9.0202216,7.2446869],[-9.0207338,7.2441985],[-9.0214668,7.2438856],[-9.021949,7.24384],[-9.0223104,7.2438991],[-9.02262,7.2439287],[-9.0228306,7.2440685],[-9.0235414,7.2451124],[-9.023875,7.2459554],[-9.0243047,7.2467712],[-9.024588,7.2470126],[-9.024792,7.2471099],[-9.0252362,7.2470001],[-9.0257563,7.2467371],[-9.0265958,7.2460147],[-9.0271409,7.2454228],[-9.0274784,7.2447987],[-9.0276695,7.2444642],[-9.0278601,7.2439862],[-9.0276287,7.2430985],[-9.0274723,7.2427529],[-9.0274083,7.2425105],[-9.0275251,7.2422552],[-9.0277415,7.241876],[-9.0281894,7.241505],[-9.0286568,7.2413753],[-9.0294392,7.2413421],[-9.0299245,7.2414864],[-9.0303472,7.2417692],[-9.030641,7.2421776],[-9.0308414,7.2424518],[-9.031037,7.2424286],[-9.0318678,7.2419285],[-9.0336234,7.2404637],[-9.0340121,7.2400129],[-9.0342204,7.2395073],[-9.0343931,7.239068],[-9.0342336,7.2381618],[-9.0341144,7.2372834],[-9.0339509,7.2363907],[-9.0337917,7.2360542],[-9.0335974,7.2358958],[-9.0331189,7.23543],[-9.0329061,7.2352774],[-9.0328564,7.2351104],[-9.0328773,7.2349622],[-9.0332263,7.2344275],[-9.0339906,7.2338709],[-9.034519,7.2336369],[-9.03578,7.2334719],[-9.0369596,7.2334896],[-9.038183,7.2337789],[-9.0388461,7.2337832],[-9.0394631,7.2335243],[-9.0406354,7.2330162],[-9.040927,7.233174],[-9.0414905,7.2336048],[-9.042117,7.2339049],[-9.0425771,7.233882],[-9.043277,7.2337229],[-9.0440019,7.2334362],[-9.0444513,7.2330866],[-9.0448282,7.23263],[-9.0448378,7.2320235],[-9.0445443,7.2315493],[-9.04419,7.2313549],[-9.043753,7.2313209],[-9.042626,7.2315699],[-9.042155,7.2316029],[-9.0412611,7.2312436],[-9.041047,7.23098],[-9.0411017,7.2307316],[-9.0415154,7.2305157],[-9.0422407,7.2303553],[-9.0427907,7.230063],[-9.0430529,7.2297466],[-9.0433591,7.2295223],[-9.043807,7.2292369],[-9.0440928,7.2291145],[-9.0442108,7.2286524],[-9.0441533,7.2282194],[-9.0439485,7.2276275],[-9.0436028,7.2272188],[-9.0431684,7.2271259],[-9.0426971,7.2269691],[-9.0416804,7.226368],[-9.0409286,7.2256332],[-9.0405417,7.2249204],[-9.0403955,7.2245576],[-9.0403247,7.2242357],[-9.0404878,7.223858],[-9.040691,7.2236509],[-9.042054,7.2229819],[-9.0424542,7.2227005],[-9.0428349,7.2222085],[-9.0430647,7.22146],[-9.0432155,7.220935],[-9.0434892,7.2205298],[-9.044144,7.2202139],[-9.0451187,7.2201221],[-9.045808,7.2202339],[-9.046229,7.2200839],[-9.0466644,7.2196045],[-9.0472009,7.2186711],[-9.0477045,7.2177234],[-9.048185,7.2169119],[-9.0488311,7.2163463],[-9.050239,7.2154199],[-9.0507333,7.2151761],[-9.0512688,7.2153031],[-9.0516218,7.2156662],[-9.0518203,7.2160673],[-9.0516083,7.2165373],[-9.0516006,7.2170431],[-9.0517747,7.2173288],[-9.052039,7.2175322],[-9.052716,7.218107],[-9.05329,7.2184349],[-9.0537278,7.2186481],[-9.053931,7.2187559],[-9.0542473,7.218638],[-9.0542678,7.2182443],[-9.053564,7.2170751],[-9.0534985,7.2168153],[-9.0534781,7.2165028],[-9.0536336,7.2160441],[-9.05421,7.2151584],[-9.0545297,7.2148506],[-9.0547506,7.2146273],[-9.0551121,7.2142616],[-9.0557791,7.2141573],[-9.0566615,7.213925],[-9.0572252,7.2135441],[-9.0577459,7.2130523],[-9.05802,7.2128168],[-9.0582451,7.212622],[-9.0583474,7.2123134],[-9.058466,7.2117411],[-9.058376,7.2113595],[-9.0586829,7.2107303],[-9.0586952,7.2104584],[-9.0596608,7.2088791],[-9.0602623,7.2082053],[-9.0606388,7.2077953],[-9.0610193,7.2074624],[-9.0611864,7.2072763],[-9.0614623,7.2071435],[-9.0620578,7.2075854],[-9.0630368,7.2082161],[-9.0634084,7.2084666],[-9.0639468,7.2085518],[-9.0646687,7.2085893],[-9.0653294,7.2084689],[-9.0669361,7.2077912],[-9.067378,7.2075436],[-9.0678895,7.2071778],[-9.0685605,7.2063907],[-9.0693953,7.2055382],[-9.0699406,7.2044092],[-9.0703282,7.2035287],[-9.0708029,7.2031228],[-9.0712243,7.2029401],[-9.0716008,7.2028548],[-9.0719527,7.2027249],[-9.0719936,7.2024367],[-9.0718626,7.2020988],[-9.0715148,7.2017588],[-9.0705962,7.2009218],[-9.0697355,7.2000088],[-9.0695426,7.1996884],[-9.0696146,7.1993683],[-9.0696858,7.1989252],[-9.0698822,7.1985111],[-9.0702177,7.1983528],[-9.0707088,7.1985599],[-9.0711875,7.1986208],[-9.0714821,7.198905],[-9.0719404,7.1990957],[-9.0727301,7.199388],[-9.0734544,7.1994854],[-9.0738922,7.1995422],[-9.0741336,7.1996275],[-9.0742482,7.1997939],[-9.0743218,7.2002324],[-9.0744855,7.2008454],[-9.074821,7.2013975],[-9.0759913,7.2024935],[-9.0765273,7.2031512],[-9.0769856,7.2037763],[-9.0783932,7.2047587],[-9.0789783,7.2050795],[-9.0790852,7.2050772],[-9.0793384,7.2050713],[-9.0795594,7.2049414],[-9.0796412,7.2045761],[-9.0795174,7.2037769],[-9.0793793,7.203139],[-9.0792758,7.2026704],[-9.0795307,7.2018927],[-9.0799849,7.201162],[-9.0804983,7.2007471],[-9.0807583,7.2005368],[-9.0811265,7.200411],[-9.0815398,7.2005247],[-9.0816912,7.2008941],[-9.0814416,7.2015192],[-9.0813598,7.2020592],[-9.0816585,7.2023027],[-9.0827878,7.2026072],[-9.0833566,7.2029847],[-9.0838517,7.203208],[-9.0841422,7.2031228],[-9.084445,7.2026437],[-9.0847314,7.2022256],[-9.0854189,7.2021485],[-9.0867261,7.20253],[-9.0870188,7.2026153],[-9.0882299,7.2025991],[-9.089748,7.2024448],[-9.0905909,7.2024773],[-9.0910246,7.2027006],[-9.0915055,7.2028694],[-9.0915811,7.2034435],[-9.0913561,7.2047304],[-9.0914666,7.2055138],[-9.0915677,7.2058414],[-9.0916671,7.2061633],[-9.0918962,7.2070848],[-9.0921049,7.2075639],[-9.0923299,7.2077465],[-9.0926818,7.2077993],[-9.0932179,7.2077262],[-9.0941467,7.2078886],[-9.0947277,7.2081119],[-9.0950387,7.2084042],[-9.0949446,7.208867],[-9.0949528,7.2093988],[-9.0951942,7.2099752],[-9.0953988,7.2101822],[-9.0956934,7.2104217],[-9.095943,7.2104989],[-9.0962417,7.2104096],[-9.0966468,7.2102067],[-9.0968105,7.2097886],[-9.0978334,7.209009],[-9.0987377,7.2078399],[-9.0990896,7.2073081],[-9.1000009,7.2070925],[-9.1002952,7.2068087],[-9.1008591,7.2064796],[-9.1014138,7.2067276],[-9.1021316,7.2068136],[-9.1024835,7.2067973],[-9.1027208,7.2066918],[-9.1029745,7.2064685],[-9.1028436,7.2061925],[-9.1024328,7.2059642],[-9.1022462,7.205612],[-9.102463,7.2048812],[-9.1027617,7.2042114],[-9.1033018,7.2035132],[-9.103977,7.2025673],[-9.1045703,7.2021127],[-9.1053928,7.2018488],[-9.1058674,7.201593],[-9.10616,7.2012448],[-9.1061702,7.2006593],[-9.1059249,7.1993909],[-9.1058183,7.198459],[-9.1060266,7.1971845],[-9.106251,7.1953437],[-9.1064375,7.1929533],[-9.1065937,7.1918797],[-9.1068587,7.191433],[-9.1072592,7.1908807],[-9.1077684,7.1906567],[-9.1081888,7.1906045],[-9.108399,7.1915599],[-9.108725,7.1921859],[-9.108849,7.1931189],[-9.1089636,7.1935702],[-9.1089521,7.1938074],[-9.10876,7.1945719],[-9.108489,7.1952349],[-9.1077498,7.1960711],[-9.107676,7.1965003],[-9.1078671,7.1970094],[-9.1082429,7.1975502],[-9.1087605,7.1980041],[-9.1093372,7.1987826],[-9.109752,7.1997409],[-9.1104869,7.201484],[-9.1111065,7.2022586],[-9.1114245,7.2029398],[-9.1113686,7.2034735],[-9.1111734,7.2040966],[-9.1108342,7.2048974],[-9.1103956,7.2061299],[-9.1102874,7.2068919],[-9.1100745,7.2083206],[-9.1091182,7.2101058],[-9.1082501,7.2113321],[-9.1081586,7.212293],[-9.1077534,7.2127359],[-9.107124,7.2129568],[-9.1062092,7.2132996],[-9.104865,7.2137229],[-9.1045169,7.2139366],[-9.1041133,7.2143651],[-9.1040846,7.2149711],[-9.10413,7.2157319],[-9.1042054,7.2162447],[-9.1043958,7.2166688],[-9.1046232,7.2173988],[-9.1044892,7.217848],[-9.104068,7.2181279],[-9.103403,7.2184919],[-9.1024189,7.2189385],[-9.1017475,7.2194194],[-9.1014967,7.2196865],[-9.1014449,7.2200642],[-9.1014608,7.2203957],[-9.1014671,7.2206421],[-9.101632,7.2211159],[-9.102183,7.2224739],[-9.1022454,7.2229061],[-9.1028331,7.2237353],[-9.1037128,7.2245903],[-9.10396,7.2248829],[-9.1040932,7.2254735],[-9.1042014,7.2257589],[-9.10513,7.2273389],[-9.10511,7.2278009],[-9.1048793,7.2288664],[-9.104705,7.2296341],[-9.1047586,7.2300929],[-9.104643,7.2306289],[-9.1047,7.2310229],[-9.104728,7.2317562],[-9.1054179,7.2322921],[-9.1056996,7.2324616],[-9.1057919,7.2326447],[-9.1058486,7.2329363],[-9.1055907,7.233457],[-9.1056428,7.2343358],[-9.1055512,7.2346942],[-9.1048316,7.2348067],[-9.1045475,7.2350327],[-9.1044005,7.2352519],[-9.1042132,7.2358839],[-9.1041806,7.236354],[-9.1042421,7.2374193],[-9.1043525,7.2380773],[-9.1046595,7.2383547],[-9.1049463,7.2386967],[-9.1053805,7.2387257],[-9.1056641,7.2387437],[-9.1060259,7.2387158],[-9.1062679,7.2386305],[-9.1065116,7.2383355],[-9.1065115,7.2374683],[-9.1066955,7.2374776],[-9.1069031,7.2376185],[-9.1069595,7.23824],[-9.107067,7.238369],[-9.1073458,7.2384674],[-9.1076453,7.2383709],[-9.1077881,7.2380124],[-9.1082048,7.237822],[-9.1088639,7.238052],[-9.1092664,7.2381165],[-9.1097813,7.2376919],[-9.1099657,7.2373828],[-9.1104801,7.2372496],[-9.1112144,7.2369661],[-9.1115442,7.23658],[-9.1115614,7.2361931],[-9.1114583,7.2357447],[-9.1113512,7.235466],[-9.1111332,7.2351344],[-9.1107203,7.2349372],[-9.1099716,7.234883],[-9.1098618,7.234652],[-9.1099365,7.2344213],[-9.1102534,7.2343058],[-9.110579,7.2344311],[-9.1110481,7.234425],[-9.1118529,7.2346651],[-9.1119789,7.2350658],[-9.1120633,7.2353651],[-9.1124653,7.2355314],[-9.1127709,7.236483],[-9.1127686,7.2368826],[-9.112493,7.2373472],[-9.1123477,7.2375457],[-9.112325,7.2376034],[-9.1122096,7.2378733],[-9.1119166,7.2382805],[-9.1110452,7.2390049],[-9.1108409,7.239246],[-9.1108254,7.2395283],[-9.1109199,7.2397595],[-9.1110776,7.2399308],[-9.112041,7.2404681],[-9.1131832,7.2411627],[-9.113628,7.2415784],[-9.1137297,7.2418263],[-9.1137902,7.2425119],[-9.1136052,7.2428362],[-9.112996,7.2437753],[-9.1128058,7.2448372],[-9.1122469,7.2470667],[-9.1120737,7.2475201],[-9.1113433,7.2480335],[-9.1110065,7.2485047],[-9.1113286,7.2491858],[-9.1117782,7.2493696],[-9.1118495,7.2500296],[-9.1125849,7.2501996],[-9.1130147,7.2498445],[-9.1137064,7.2498761],[-9.1141375,7.2496409],[-9.1152066,7.2488694],[-9.1153929,7.249008],[-9.1151142,7.2493073],[-9.1151823,7.2496531],[-9.1157138,7.2498307],[-9.1160237,7.2495588],[-9.1169828,7.2496859],[-9.1173288,7.249898],[-9.1175007,7.2506189],[-9.1178299,7.2508802],[-9.1182797,7.2508257],[-9.1184971,7.2502672],[-9.1190351,7.2500227],[-9.1196028,7.2498622],[-9.1198544,7.2498974],[-9.1201146,7.2500437],[-9.120152,7.2503857],[-9.120405,7.2510744],[-9.1205406,7.2512076],[-9.1212328,7.2509237],[-9.1215323,7.2510804],[-9.1216577,7.251407],[-9.1218086,7.2518592],[-9.1220164,7.2520901],[-9.122387,7.2524039],[-9.1224795,7.2531958],[-9.1222883,7.2533648],[-9.1218221,7.2534348],[-9.1218139,7.2538947],[-9.1226337,7.2545191],[-9.1227768,7.2548356],[-9.1228918,7.2549476],[-9.1235217,7.2548833],[-9.123947,7.2547707],[-9.1252846,7.2546244],[-9.1257941,7.2549252],[-9.1261041,7.2554499],[-9.1265241,7.2559438],[-9.1264258,7.2565324],[-9.126259,7.2569366],[-9.126115,7.2572049],[-9.1266161,7.257693],[-9.1265304,7.2582018],[-9.1262585,7.2583102],[-9.1259732,7.2585639],[-9.1256755,7.2590024],[-9.1257751,7.2597531],[-9.1252467,7.2609216],[-9.1246427,7.2624881],[-9.1244512,7.2629564],[-9.1240864,7.2635985],[-9.1235026,7.2641169],[-9.1229958,7.2644064],[-9.1227864,7.2647725],[-9.122773,7.2653716],[-9.1230737,7.2668444],[-9.1232192,7.2672438],[-9.1232371,7.2677881],[-9.1232132,7.2685349],[-9.1231679,7.2690119],[-9.1227675,7.2703737],[-9.1229942,7.2707541],[-9.1228572,7.2715781],[-9.1233112,7.2730492],[-9.1236199,7.2735768],[-9.1241096,7.2739401],[-9.124559,7.2746089],[-9.124832,7.2748279],[-9.125182,7.2749489],[-9.125729,7.2750259],[-9.126189,7.2750269],[-9.126868,7.2747429],[-9.127876,7.2741749],[-9.128204,7.2741649],[-9.129123,7.2744839],[-9.129802,7.2745279],[-9.131235,7.2744539],[-9.132539,7.2737109],[-9.133098,7.2734269],[-9.133459,7.2733079],[-9.134313,7.2733419],[-9.135111,7.2734739],[-9.135604,7.2734859],[-9.135921,7.2734199],[-9.136513,7.2731589],[-9.137816,7.2723179],[-9.138419,7.2720119],[-9.138835,7.2718919],[-9.139284,7.2718379],[-9.141812,7.2719399],[-9.142239,7.2718969],[-9.143114,7.2716789],[-9.144319,7.2715059],[-9.144734,7.2716479],[-9.145215,7.2721089],[-9.145434,7.2722399],[-9.145762,7.2722299],[-9.148303,7.2712919],[-9.148587,7.2711499],[-9.149003,7.2711729],[-9.150097,7.2718959],[-9.150337,7.2719079],[-9.150589,7.2718419],[-9.151115,7.2715149],[-9.151476,7.2713509],[-9.151816,7.2713519],[-9.152122,7.2714609],[-9.15257,7.2718779],[-9.152811,7.2720089],[-9.153095,7.2720429],[-9.153489,7.2719559],[-9.154015,7.2716499],[-9.154902,7.2710159],[-9.155132,7.2709289],[-9.155351,7.2710389],[-9.155504,7.2712689],[-9.155492,7.2720459],[-9.155721,7.2723739],[-9.156126,7.2726699],[-9.156683,7.2732399],[-9.156846,7.2735799],[-9.156999,7.2737769],[-9.15713,7.2738869],[-9.157721,7.2740409],[-9.157885,7.2742159],[-9.15794,7.2744349],[-9.15795,7.2747629],[-9.158037,7.2749929],[-9.158168,7.2751249],[-9.158551,7.2751359],[-9.15888,7.2749179],[-9.159275,7.2745459],[-9.159647,7.2742949],[-9.160227,7.2741309],[-9.160566,7.2742849],[-9.160818,7.2745589],[-9.16085,7.2747999],[-9.160751,7.2752259],[-9.160849,7.2753909],[-9.161046,7.2755659],[-9.161757,7.2757529],[-9.163059,7.2758199],[-9.163322,7.2759409],[-9.163442,7.2761599],[-9.163507,7.2764119],[-9.163419,7.2766639],[-9.163572,7.2771559],[-9.163823,7.2773209],[-9.164731,7.2773439],[-9.165092,7.2774539],[-9.165431,7.2776619],[-9.165573,7.2778369],[-9.165573,7.2782529],[-9.165627,7.2784939],[-9.165791,7.2786909],[-9.166075,7.2787349],[-9.166568,7.2786809],[-9.167039,7.2785619],[-9.167706,7.2784639],[-9.167925,7.2785079],[-9.1681,7.2786509],[-9.168274,7.2792089],[-9.168624,7.2794279],[-9.168788,7.2797569],[-9.168809,7.2800409],[-9.168776,7.2804569],[-9.168523,7.2808839],[-9.16837,7.2812449],[-9.168282,7.2816379],[-9.16862,7.2824049],[-9.16828,7.2827879],[-9.168159,7.2829949],[-9.168202,7.2837829],[-9.168594,7.2848449],[-9.1688181,7.2851913],[-9.16914,7.2856889],[-9.169543,7.2866629],[-9.169707,7.2869589],[-9.169849,7.2871559],[-9.170745,7.2877809],[-9.170844,7.2880109],[-9.170886,7.2888319],[-9.171071,7.2892369],[-9.171377,7.2895769],[-9.171618,7.2897629],[-9.172461,7.2896979],[-9.172658,7.2897209],[-9.172833,7.2898519],[-9.173049,7.2914499],[-9.173497,7.2920309],[-9.173781,7.2921079],[-9.174307,7.2921189],[-9.174854,7.2922729],[-9.175116,7.2922849],[-9.175828,7.2920989],[-9.176069,7.2920779],[-9.176276,7.2922419],[-9.176297,7.2931939],[-9.176351,7.2935009],[-9.17646,7.2937199],[-9.176624,7.2937969],[-9.176832,7.2937859],[-9.17737,7.2931629],[-9.177578,7.2930539],[-9.177753,7.2930209],[-9.177884,7.2930979],[-9.177927,7.2932949],[-9.177729,7.2940059],[-9.177762,7.2942029],[-9.177915,7.2943569],[-9.178199,7.2944989],[-9.178385,7.2947399],[-9.178406,7.2949919],[-9.17834,7.2951669],[-9.178165,7.2953749],[-9.177694,7.2956589],[-9.177628,7.2958449],[-9.177627,7.2965999],[-9.177703,7.2968399],[-9.177878,7.2970599],[-9.178184,7.2971479],[-9.178381,7.2972789],[-9.178523,7.2974429],[-9.178599,7.2978049],[-9.178608,7.2990089],[-9.178542,7.2992709],[-9.178618,7.2999059],[-9.178782,7.3001139],[-9.178967,7.3002349],[-9.179449,7.3003879],[-9.179667,7.3005309],[-9.179733,7.3006839],[-9.179733,7.3009029],[-9.179568,7.3013629],[-9.179523,7.3019859],[-9.179752,7.3022269],[-9.180037,7.3023149],[-9.18054,7.3022829],[-9.180891,7.3021409],[-9.181756,7.3019889],[-9.181854,7.3020329],[-9.181909,7.3021429],[-9.181821,7.3022739],[-9.181482,7.3023719],[-9.181416,7.3024589],[-9.181405,7.3026019],[-9.181514,7.3027219],[-9.181754,7.3028539],[-9.182083,7.3028649],[-9.182685,7.3026689],[-9.183058,7.3023409],[-9.183343,7.3020019],[-9.183584,7.3018379],[-9.183847,7.3017729],[-9.184131,7.3018279],[-9.18435,7.3019269],[-9.184787,7.3024419],[-9.184984,7.3026059],[-9.185717,7.3025849],[-9.186034,7.3026399],[-9.186275,7.3027609],[-9.186395,7.3029469],[-9.186438,7.3036149],[-9.187551,7.3055309],[-9.188054,7.3062209],[-9.188392,7.3064739],[-9.188677,7.3065719],[-9.189235,7.3065729],[-9.189695,7.3066279],[-9.190023,7.3067379],[-9.190384,7.3070119],[-9.191106,7.3070129],[-9.191325,7.3070899],[-9.191718,7.3075609],[-9.191904,7.3077039],[-9.192265,7.3077259],[-9.192659,7.3081639],[-9.193095,7.3092919],[-9.193072,7.3100359],[-9.193137,7.3102659],[-9.193279,7.3103969],[-9.193531,7.3104419],[-9.194056,7.3102999],[-9.194209,7.3103329],[-9.19445,7.3104759],[-9.196417,7.3124259],[-9.197358,7.3129299],[-9.197511,7.3131169],[-9.19799,7.3145509],[-9.198044,7.3151089],[-9.19801,7.3160609],[-9.198217,7.3164229],[-9.198436,7.3166089],[-9.198523,7.3167839],[-9.198424,7.3171229],[-9.197919,7.3180419],[-9.197886,7.3184029],[-9.198104,7.3186439],[-9.198257,7.3187759],[-9.19852,7.3187869],[-9.198783,7.3187109],[-9.199101,7.3185799],[-9.199846,7.3180879],[-9.200108,7.3180339],[-9.200316,7.3181539],[-9.200644,7.3184389],[-9.200917,7.3185709],[-9.20129,7.3186149],[-9.201673,7.3185279],[-9.202198,7.3183319],[-9.202472,7.3183869],[-9.202713,7.3183759],[-9.20303,7.3186059],[-9.203205,7.3189459],[-9.203466,7.3197669],[-9.203848,7.3207519],[-9.203902,7.3211789],[-9.203759,7.3214629],[-9.203178,7.3219659],[-9.203079,7.3221849],[-9.203035,7.3226549],[-9.202914,7.3229619],[-9.202508,7.3235519],[-9.202507,7.3240229],[-9.202594,7.3244169],[-9.202812,7.3250519],[-9.202834,7.3253259],[-9.202779,7.3256979],[-9.202647,7.3260369],[-9.202602,7.3263759],[-9.202689,7.3268029],[-9.202711,7.3271749],[-9.202666,7.3276129],[-9.202084,7.329133],[-9.202007,7.32956],[-9.202082,7.33014],[-9.202638,7.331541],[-9.202999,7.3322529],[-9.203053,7.3328],[-9.202832,7.3336539],[-9.202393,7.334945],[-9.201679,7.3366839],[-9.201569,7.337045],[-9.201491,7.337789],[-9.201523,7.338446],[-9.201566,7.338675],[-9.201839,7.339332],[-9.201871,7.339989],[-9.201969,7.340197],[-9.202395,7.3406459],[-9.202778,7.3408769],[-9.203193,7.3413589],[-9.203706,7.3425409],[-9.204198,7.3429689],[-9.2047,7.3438009],[-9.20471,7.3440959],[-9.204655,7.3442929],[-9.204524,7.3445229],[-9.203976,7.3451019],[-9.203614,7.3456709],[-9.203591,7.3461849],[-9.203842,7.3469409],[-9.204082,7.3474659],[-9.204464,7.3481339],[-9.205108,7.3490649],[-9.205906,7.3499089],[-9.206617,7.3503689],[-9.206737,7.3505339],[-9.20701,7.3511359],[-9.207194,7.3521869],[-9.207259,7.3528539],[-9.207225,7.3532699],[-9.207116,7.3534229],[-9.206897,7.3535219],[-9.206207,7.3534989],[-9.205977,7.3535749],[-9.205769,7.3537059],[-9.205648,7.3539359],[-9.205516,7.3544609],[-9.205197,7.3553909],[-9.205053,7.3564299],[-9.204933,7.3567039],[-9.204505,7.3569549],[-9.203662,7.3570199],[-9.203191,7.3572049],[-9.202939,7.3574349],[-9.202687,7.3578059],[-9.202522,7.3584409],[-9.201985,7.3590199],[-9.201984,7.3593489],[-9.202071,7.3595789],[-9.202246,7.3597979],[-9.202531,7.3599179],[-9.203844,7.3600509],[-9.204205,7.3603579],[-9.204215,7.3605769],[-9.20416,7.3609159],[-9.203711,7.3613749],[-9.203524,7.3617689],[-9.203392,7.3624579],[-9.203171,7.3632349],[-9.203193,7.3635419],[-9.20328,7.3638919],[-9.203301,7.3642089],[-9.203268,7.3644169],[-9.203169,7.3645919],[-9.202665,7.3651389],[-9.202643,7.3654889],[-9.202828,7.3660359],[-9.202839,7.3663209],[-9.202991,7.3666169],[-9.203199,7.3668029],[-9.203451,7.3669449],[-9.203932,7.3669459],[-9.204929,7.3667609],[-9.205356,7.3667729],[-9.205563,7.3668169],[-9.205717,7.3669369],[-9.20588,7.3672109],[-9.205792,7.3674519],[-9.205562,7.3677579],[-9.20543,7.3680419],[-9.205408,7.3683919],[-9.205342,7.3685349],[-9.205133,7.3689059],[-9.204793,7.3693769],[-9.204255,7.3710719],[-9.204243,7.3716849],[-9.204395,7.3726149],[-9.204547,7.3731739],[-9.204864,7.3737319],[-9.204896,7.3740169],[-9.204786,7.3742139],[-9.204468,7.3744209],[-9.204403,7.3745739],[-9.204554,7.3758989],[-9.204488,7.3762599],[-9.204312,7.3765219],[-9.204092,7.3770139],[-9.204003,7.3783279],[-9.203904,7.3785349],[-9.203696,7.3787539],[-9.202995,7.3790599],[-9.202545,7.3794529],[-9.202205,7.3801199],[-9.2016,7.3818379],[-9.201589,7.3822859],[-9.20173,7.3827019],[-9.201894,7.3830199],[-9.202113,7.3832829],[-9.202167,7.3835669],[-9.202165,7.3849459],[-9.202241,7.3853189],[-9.202361,7.3856029],[-9.202525,7.3857679],[-9.203608,7.3862179],[-9.204144,7.3865569],[-9.205391,7.3869639],[-9.205665,7.3871719],[-9.205894,7.3876099],[-9.206046,7.3881029],[-9.20621,7.3883879],[-9.206812,7.3889569],[-9.206986,7.3892969],[-9.207435,7.3892649],[-9.208049,7.3887289],[-9.208356,7.3885539],[-9.20864,7.3884669],[-9.211619,7.3878909],[-9.211849,7.3877599],[-9.212046,7.3875189],[-9.212595,7.3865129],[-9.213022,7.3863159],[-9.213471,7.3861749],[-9.215125,7.3859249],[-9.215683,7.3859039],[-9.216176,7.3859809],[-9.216362,7.3859589],[-9.217085,7.3855549],[-9.217391,7.3855009],[-9.218442,7.3856549],[-9.219033,7.3856889],[-9.221342,7.3861949],[-9.222349,7.3862619],[-9.224517,7.3862309],[-9.22537,7.3864179],[-9.225742,7.3865499],[-9.226038,7.3867689],[-9.226202,7.3870319],[-9.226322,7.3873279],[-9.226626,7.3887949],[-9.226822,7.3891449],[-9.227501,7.3893209],[-9.228541,7.3893769],[-9.231311,7.3893469],[-9.231628,7.3894459],[-9.231934,7.3895999],[-9.232973,7.3903339],[-9.233564,7.3906409],[-9.235107,7.3906429],[-9.235425,7.3905009],[-9.236443,7.3901849],[-9.237067,7.3901749],[-9.237834,7.3902299],[-9.238863,7.3901109],[-9.239334,7.3900239],[-9.240769,7.3893359],[-9.24125,7.3893909],[-9.241786,7.3895999],[-9.241984,7.3895449],[-9.242181,7.3894029],[-9.242477,7.3890859],[-9.243091,7.3882879],[-9.243343,7.3881349],[-9.244986,7.3875569],[-9.246005,7.3870219],[-9.246322,7.3867809],[-9.246608,7.3864319],[-9.246882,7.3859609],[-9.24753,7.3845939],[-9.247661,7.3843969],[-9.247848,7.3842329],[-9.248428,7.3842779],[-9.24869,7.3843439],[-9.249632,7.3843769],[-9.250115,7.3844499],[-9.251172,7.3848449],[-9.251524,7.3848849],[-9.252007,7.3851609],[-9.252268,7.3852009],[-9.25253,7.3851229],[-9.252778,7.3849539],[-9.253133,7.3844329],[-9.253656,7.3842899],[-9.253774,7.3841209],[-9.254009,7.3840039],[-9.254245,7.3839789],[-9.254987,7.3845939],[-9.255431,7.3848309],[-9.255744,7.3848969],[-9.256542,7.3846249],[-9.257732,7.3841449],[-9.258714,7.3835079],[-9.259054,7.3834689],[-9.259446,7.3835229],[-9.25972,7.3836539],[-9.260059,7.3836809],[-9.260282,7.3834989],[-9.260609,7.3834079],[-9.260792,7.3832779],[-9.260936,7.3830959],[-9.261043,7.3823259],[-9.261435,7.3823269],[-9.261697,7.3821709],[-9.261854,7.3819229],[-9.261895,7.3812959],[-9.262485,7.3806449],[-9.262942,7.3806459],[-9.263571,7.3803079],[-9.265048,7.3799199],[-9.265795,7.3792689],[-9.265914,7.3787469],[-9.266228,7.3785129],[-9.266542,7.3784489],[-9.267273,7.3784509],[-9.267574,7.3783209],[-9.268661,7.3773699],[-9.269119,7.3771099],[-9.269472,7.3770069],[-9.269851,7.3769689],[-9.271105,7.3769719],[-9.27185,7.3771309],[-9.272907,7.3775519],[-9.273363,7.3776839],[-9.273873,7.3776589],[-9.274317,7.3775689],[-9.274671,7.3774389],[-9.275037,7.3772049],[-9.275365,7.3768789],[-9.275548,7.3767619],[-9.276671,7.3768169],[-9.277142,7.3767139],[-9.277809,7.3764029],[-9.279013,7.3757009],[-9.279615,7.3754279],[-9.280582,7.3751819],[-9.281562,7.3751589],[-9.28198,7.3752649],[-9.282345,7.3754479],[-9.282814,7.3758019],[-9.283283,7.3762349],[-9.283622,7.3764439],[-9.283988,7.3765499],[-9.284354,7.3764719],[-9.284955,7.3764479],[-9.285373,7.3765669],[-9.285829,7.3767639],[-9.28622,7.3770519],[-9.286741,7.3777459],[-9.287338,7.3791839],[-9.287749,7.3812879],[-9.287944,7.3819019],[-9.288021,7.3823599],[-9.288267,7.3828699],[-9.288379,7.3848419],[-9.288443,7.3852859],[-9.288559,7.3856909],[-9.288571,7.3861619],[-9.288437,7.3871929],[-9.288541,7.3875719],[-9.288801,7.3878989],[-9.289179,7.3880569],[-9.289532,7.3880579],[-9.289899,7.3878109],[-9.290632,7.3871339],[-9.290921,7.3865989],[-9.291053,7.3861809],[-9.291263,7.3859209],[-9.291433,7.3858039],[-9.291904,7.3857919],[-9.292243,7.3858709],[-9.292713,7.3860159],[-9.293026,7.3861869],[-9.293247,7.3864879],[-9.293702,7.3874159],[-9.293727,7.3876249],[-9.29357,7.3878069],[-9.29268,7.3883139],[-9.292561,7.3886409],[-9.292572,7.3895679],[-9.292466,7.3898289],[-9.292218,7.3900759],[-9.292204,7.3902979],[-9.292268,7.3906119],[-9.292411,7.3908999],[-9.292423,7.3912129],[-9.291558,7.3920599],[-9.291349,7.3923599],[-9.291204,7.3927639],[-9.290953,7.3935209],[-9.290725,7.395545],[-9.290318,7.396393],[-9.290264,7.39668],[-9.290195,7.398142],[-9.290154,7.398534],[-9.290062,7.39886],[-9.289392,7.400125],[-9.289036,7.401208],[-9.288564,7.401939],[-9.288498,7.402173],[-9.288482,7.402931],[-9.288139,7.404079],[-9.288006,7.40481],[-9.2878301,7.4070299],[-9.2879331,7.4073699],[-9.2881291,7.4076709],[-9.2880891,7.4079059],[-9.2878521,7.4083879],[-9.2878121,7.4087539],[-9.2880981,7.4092146],[-9.2901871,7.4095726],[-9.2906831,7.4098226],[-9.2910741,7.4100716],[-9.2915431,7.4104646],[-9.2917391,7.4107257],[-9.2920111,7.4114057],[-9.2923201,7.4127916],[-9.2924231,7.4136276],[-9.2925911,7.4142546],[-9.2926411,7.4149866],[-9.2926141,7.4152737],[-9.2922321,7.4160697],[-9.2921661,7.4163827],[-9.2921641,7.4171397],[-9.2923961,7.4181467],[-9.2924731,7.4187867],[-9.2921841,7.4192557],[-9.2918431,7.4196727],[-9.2917771,7.4198427],[-9.2917901,7.4200127],[-9.2918671,7.4202867],[-9.2923221,7.4212017],[-9.2925171,7.4214767],[-9.2930891,7.4225497],[-9.2932051,7.4230327],[-9.2934757,7.4240659],[-9.2940952,7.4241174],[-9.2942948,7.4245255],[-9.2939432,7.425349],[-9.294049,7.4261361],[-9.2945057,7.4265988],[-9.2955253,7.4272577],[-9.2972939,7.4275776],[-9.2997672,7.4273942],[-9.3004486,7.4269142],[-9.3014876,7.4258302],[-9.3022413,7.4247388],[-9.3034471,7.4241557],[-9.3037323,7.4240731],[-9.3046102,7.4234997],[-9.3059591,7.4233439],[-9.3065744,7.4236555],[-9.3072185,7.4242673],[-9.3077485,7.4248377],[-9.3082453,7.4260382],[-9.3081841,7.42645],[-9.3080748,7.4267929],[-9.3080346,7.4273499],[-9.3080518,7.4279749],[-9.3084161,7.4288257],[-9.3101523,7.4312254],[-9.3106462,7.4326494],[-9.3109159,7.4337031],[-9.3111891,7.4345326],[-9.3117117,7.4348826],[-9.3121717,7.4349458],[-9.313548,7.434858],[-9.316113,7.434865],[-9.3171921,7.4347958],[-9.3177918,7.4348826],[-9.32047,7.4358135],[-9.3212623,7.4360419],[-9.3220607,7.4360442],[-9.3227422,7.4355056],[-9.3232853,7.4349101],[-9.3246292,7.433213],[-9.3258749,7.4321527],[-9.3264378,7.4318811],[-9.3270685,7.4317251],[-9.3280577,7.4315482],[-9.3295121,7.4313864],[-9.330141,7.4311519],[-9.3305403,7.4308448],[-9.3305611,7.4304295],[-9.3300508,7.430079],[-9.329205,7.4295496],[-9.3287532,7.4290882],[-9.3286581,7.4286289],[-9.32866,7.4277155],[-9.3287354,7.427333],[-9.3290824,7.4270981],[-9.3296118,7.427099],[-9.3299887,7.4272416],[-9.3307386,7.4278559],[-9.3315583,7.4286797],[-9.3321698,7.4290289],[-9.3326459,7.4291287],[-9.3333972,7.4292236],[-9.3344268,7.4296174],[-9.3351559,7.4299996],[-9.3356482,7.4301051],[-9.3362251,7.4299619],[-9.3375975,7.4292472],[-9.3382036,7.4289357],[-9.3392752,7.4289424],[-9.3422874,7.4290228],[-9.343689,7.4291699],[-9.344667,7.4293861],[-9.3452432,7.4295967],[-9.3460604,7.4300258],[-9.346567,7.4303601],[-9.3471538,7.4308943],[-9.3476347,7.4311558],[-9.3487535,7.4313605],[-9.3491062,7.4315061],[-9.3494267,7.4317971],[-9.3495307,7.4321428],[-9.3495288,7.4325763],[-9.3494786,7.4329419],[-9.3492993,7.4333763],[-9.3493884,7.433714],[-9.3495258,7.4341108],[-9.3497544,7.4344161],[-9.3501179,7.4350377],[-9.3505236,7.4355436],[-9.3508787,7.4357816],[-9.3512382,7.4357268],[-9.3514783,7.4355145],[-9.3517663,7.4346609],[-9.3523177,7.433494],[-9.3525161,7.432762],[-9.3529194,7.4321599],[-9.353461,7.4317735],[-9.3542355,7.4314239],[-9.3551737,7.4311439],[-9.3558889,7.4310585],[-9.3562058,7.4310736],[-9.3564596,7.431315],[-9.3569941,7.4323899],[-9.3573477,7.432904],[-9.3580134,7.4333359],[-9.3587804,7.4336143],[-9.3595018,7.4335403],[-9.3600968,7.4335597],[-9.360501,7.4334598],[-9.3622737,7.4326718],[-9.3638291,7.431744],[-9.3649678,7.4307317],[-9.3657214,7.4297903],[-9.3657769,7.4291314],[-9.3656919,7.4287318],[-9.3653137,7.4283569],[-9.3645193,7.4281229],[-9.3641408,7.4276733],[-9.363417,7.4267942],[-9.3634016,7.4264126],[-9.3635316,7.4260071],[-9.3645956,7.4254903],[-9.3650027,7.4251112],[-9.3656233,7.4248291],[-9.3661047,7.4245681],[-9.3666659,7.4240591],[-9.3670429,7.423631],[-9.3674248,7.4230719],[-9.3676702,7.4225993],[-9.3677499,7.4220053],[-9.3676882,7.4213498],[-9.3671774,7.4206615],[-9.3670673,7.4198484],[-9.3668205,7.4193143],[-9.3657184,7.4180348],[-9.3637949,7.4160374],[-9.3635339,7.4159069],[-9.3631275,7.4158175],[-9.3630002,7.4157323],[-9.3629694,7.4155765],[-9.3630807,7.4152159],[-9.3633412,7.4141828],[-9.3639819,7.4135118],[-9.3645291,7.4130826],[-9.3650537,7.4130177],[-9.3654538,7.4132006],[-9.3657628,7.4132974],[-9.3659313,7.413585],[-9.3659952,7.4137555],[-9.3660466,7.4142308],[-9.3667394,7.4144239],[-9.3671501,7.4142948],[-9.3676077,7.4140487],[-9.3680565,7.4135678],[-9.3684193,7.413327],[-9.368873,7.4131742],[-9.3700348,7.4133431],[-9.3708282,7.4136237],[-9.3718623,7.4141894],[-9.3722125,7.4142661],[-9.372506,7.4141956],[-9.3729371,7.4138675],[-9.3734269,7.4133957],[-9.3748995,7.4123542],[-9.3755968,7.4118692],[-9.3758417,7.4114884],[-9.3760739,7.410867],[-9.3762178,7.4104392],[-9.3771412,7.4097648],[-9.3778641,7.4093668],[-9.3783019,7.4090817],[-9.3788538,7.4089023],[-9.3801314,7.4092039],[-9.38082,7.4092634],[-9.3811231,7.408907],[-9.3817164,7.4081946],[-9.3817958,7.407854],[-9.3816847,7.4072325],[-9.3815309,7.4064973],[-9.3817154,7.405928],[-9.3820443,7.4058689],[-9.3824664,7.4061415],[-9.3826765,7.4061254],[-9.3828353,7.405663],[-9.3829228,7.4048836],[-9.382973,7.4042697],[-9.3830907,7.4035662],[-9.3830441,7.4023393],[-9.3833742,7.4014367],[-9.3834216,7.4004474],[-9.3834074,7.3997876],[-9.3835533,7.3992266],[-9.3834359,7.3984293],[-9.3836244,7.3981788],[-9.3836694,7.3973986],[-9.3839262,7.3969736],[-9.383863,7.3964275],[-9.3838935,7.3956628],[-9.3839876,7.3951278],[-9.3842036,7.3948176],[-9.3845869,7.3942141],[-9.3850183,7.394064],[-9.3861844,7.3939865],[-9.3861881,7.3945657],[-9.3865794,7.3947692],[-9.3878758,7.3949452],[-9.388763,7.3951367],[-9.3894816,7.3957162],[-9.3905976,7.3960282],[-9.3912743,7.3956352],[-9.3918801,7.3950256],[-9.3926022,7.3944839],[-9.3932742,7.3944299],[-9.393637,7.3945262],[-9.3940917,7.394972],[-9.3943414,7.3955127],[-9.3949423,7.395579],[-9.3957847,7.3955491],[-9.3962711,7.3955984],[-9.39683,7.3954321],[-9.3971326,7.3950273],[-9.3974261,7.3945475],[-9.3984252,7.3943365],[-9.3992611,7.3940376],[-9.3992975,7.3937219],[-9.3991836,7.3933042],[-9.3990341,7.3925659],[-9.3989719,7.3920465],[-9.398798,7.3915711],[-9.3989032,7.3911533],[-9.3998372,7.3899618],[-9.4007076,7.3888538],[-9.4035429,7.3883492],[-9.4038004,7.3887031],[-9.4038566,7.3892345],[-9.4040415,7.3897433],[-9.4043319,7.3899414],[-9.4048158,7.3898639],[-9.4054988,7.3896185],[-9.4062836,7.3895336],[-9.4066729,7.3895815],[-9.4068974,7.3898554],[-9.4070274,7.3901496],[-9.4072326,7.3906171],[-9.4074908,7.3912665],[-9.4071228,7.3919109],[-9.4067682,7.3925379],[-9.4058015,7.393861],[-9.4057523,7.3943727],[-9.4054693,7.3950255],[-9.4051721,7.3956059],[-9.4049601,7.3959039],[-9.4046137,7.396417],[-9.4041996,7.3970364],[-9.4035756,7.3979186],[-9.4026369,7.3990941],[-9.4023995,7.3996924],[-9.4022609,7.4005046],[-9.4021209,7.402054],[-9.4022588,7.4025209],[-9.4028721,7.4031021],[-9.4045299,7.4043745],[-9.4054751,7.4050995],[-9.4057105,7.4055203],[-9.405754,7.4058784],[-9.4056501,7.4061543],[-9.4049182,7.4068828],[-9.4044266,7.4076337],[-9.4041163,7.4080232],[-9.4040862,7.4084459],[-9.4039342,7.40888],[-9.4038624,7.4091279],[-9.403361,7.4099147],[-9.4029386,7.4104889],[-9.4028859,7.4108435],[-9.4029122,7.4114172],[-9.4031723,7.4120641],[-9.4035015,7.4124771],[-9.4039187,7.4128713],[-9.404146,7.4130857],[-9.4047448,7.4135712],[-9.4051305,7.4135554],[-9.4054489,7.4129262],[-9.405758,7.4124529],[-9.4063772,7.4121657],[-9.4069735,7.4119713],[-9.4074382,7.4121018],[-9.4077336,7.4122962],[-9.408244,7.4129248],[-9.4088215,7.4137612],[-9.4095251,7.4147495],[-9.4099066,7.4153968],[-9.4101081,7.415799],[-9.4100329,7.4161665],[-9.409681,7.4170828],[-9.4096703,7.4174531],[-9.4097831,7.4179884],[-9.4098905,7.4183693],[-9.4101081,7.4186597],[-9.410468,7.4187982],[-9.4108897,7.418649],[-9.411298,7.418324],[-9.4119722,7.418095],[-9.4123966,7.4182148],[-9.4126008,7.4188648],[-9.4126142,7.419187],[-9.4126867,7.4197118],[-9.4125766,7.4201086],[-9.41212,7.4205348],[-9.4120189,7.4207611],[-9.4121152,7.4212199],[-9.4122334,7.4214714],[-9.4129778,7.4214731],[-9.4132224,7.4219883],[-9.4131487,7.4225298],[-9.4130451,7.4234559],[-9.413044,7.4244582],[-9.4131658,7.4248804],[-9.4131916,7.4249696],[-9.4133178,7.4252008],[-9.4132465,7.4254072],[-9.4130213,7.4257143],[-9.41297,7.4260688],[-9.4129528,7.4262413],[-9.4133699,7.4270304],[-9.4138211,7.4280109],[-9.4140651,7.4283186],[-9.4144754,7.4278214],[-9.4148514,7.4273167],[-9.4150451,7.4271246],[-9.4154701,7.4272452],[-9.4159293,7.4271959],[-9.4161563,7.4273184],[-9.416304,7.4273011],[-9.4164263,7.427136],[-9.417391,7.4275885],[-9.4178968,7.4274516],[-9.419082,7.4263517],[-9.419534,7.425911],[-9.4199177,7.4257264],[-9.4203658,7.4257905],[-9.4205482,7.426034],[-9.4206659,7.4263743],[-9.4210383,7.4261446],[-9.4214675,7.425685],[-9.4219537,7.4251388],[-9.4226602,7.4250333],[-9.4231427,7.4243629],[-9.4233745,7.4237489],[-9.423758,7.4228787],[-9.4239566,7.4198283],[-9.4243275,7.4189816],[-9.4248593,7.4181718],[-9.424948,7.4178149],[-9.4254181,7.416928],[-9.426026,7.4161765],[-9.4264844,7.4156894],[-9.4281336,7.4149276],[-9.4294982,7.4143308],[-9.429928,7.4142243],[-9.4304598,7.4143149],[-9.4314564,7.4148955],[-9.4317196,7.4152898],[-9.4316631,7.4157213],[-9.4317626,7.4161342],[-9.4320124,7.4166829],[-9.4322783,7.4171943],[-9.4328424,7.4175113],[-9.4332533,7.4179774],[-9.4338201,7.4180333],[-9.4350127,7.416555],[-9.436063,7.4158918],[-9.4361387,7.4153971],[-9.4361328,7.4145732],[-9.4360602,7.4141099],[-9.4360379,7.413413],[-9.4361489,7.4127859],[-9.4363208,7.4123731],[-9.4368876,7.4120243],[-9.4376209,7.4117179],[-9.4380721,7.4111612],[-9.4385875,7.4104102],[-9.43968,7.409573],[-9.4407045,7.4090329],[-9.4418756,7.408343],[-9.4432912,7.4077437],[-9.4447592,7.4068888],[-9.4455556,7.4065658],[-9.4462699,7.4063054],[-9.4467749,7.4053731],[-9.447852,7.405501],[-9.4484135,7.4056448],[-9.4490796,7.4056875],[-9.4495478,7.4055462],[-9.4504868,7.4049932],[-9.4511639,7.4044435],[-9.4512257,7.4036844],[-9.4510753,7.4027228],[-9.4511747,7.401969],[-9.4514916,7.4013323],[-9.452213,7.4008643],[-9.4526627,7.4002988],[-9.4532107,7.3998034],[-9.4537694,7.3996169],[-9.4541857,7.399838],[-9.4541454,7.4002509],[-9.4541374,7.4005892],[-9.4543684,7.4008129],[-9.4548683,7.4008827],[-9.4554545,7.4007627],[-9.4560101,7.4005652],[-9.4566712,7.3999635],[-9.4576443,7.3995177],[-9.4583033,7.399022],[-9.4589661,7.3987662],[-9.4600365,7.3983292],[-9.4601492,7.3983529],[-9.4612482,7.3985843],[-9.4630946,7.3980669],[-9.4634436,7.3979158],[-9.4637125,7.3975364],[-9.4638797,7.3968042],[-9.4641019,7.3964493],[-9.4645584,7.3962991],[-9.46532,7.396301],[-9.4662529,7.3962097],[-9.4673999,7.3959061],[-9.468016,7.3953729],[-9.4684567,7.3946954],[-9.4685184,7.3939281],[-9.4684652,7.3931247],[-9.4685037,7.3922276],[-9.4685585,7.3914088],[-9.4684925,7.3910217],[-9.4683018,7.3906968],[-9.4681543,7.3903004],[-9.4681283,7.3900899],[-9.4682204,7.3893517],[-9.4681037,7.388838],[-9.4677079,7.3885969],[-9.467424,7.387908],[-9.4673207,7.3871095],[-9.4673923,7.3864291],[-9.46756,7.3857009],[-9.4681401,7.3850534],[-9.4687151,7.3841773],[-9.4686963,7.3837331],[-9.4686184,7.3832957],[-9.4684949,7.3823634],[-9.4685251,7.3819938],[-9.4690863,7.3818058],[-9.4696962,7.3818305],[-9.4699274,7.3816124],[-9.4703681,7.3802923],[-9.4704852,7.3798231],[-9.4703978,7.3772845],[-9.4704818,7.3767538],[-9.4709243,7.3760983],[-9.4714671,7.3754746],[-9.4719217,7.3751327],[-9.4725992,7.3748655],[-9.4731212,7.3747017],[-9.4736794,7.3739966],[-9.4737541,7.3734923],[-9.4739408,7.3730954],[-9.4740247,7.3726068],[-9.4740321,7.3720037],[-9.4741331,7.3715528],[-9.4744107,7.3707827],[-9.4745154,7.3698625],[-9.4750234,7.3683667],[-9.4750707,7.3675258],[-9.475253,7.3670067],[-9.4755233,7.3667272],[-9.4763091,7.3666372],[-9.47685,7.3667911],[-9.4774198,7.3671879],[-9.4776276,7.3673503],[-9.4781741,7.3676152],[-9.4790832,7.3670243],[-9.47984,7.3664096],[-9.4803349,7.36579],[-9.4809892,7.3658751],[-9.4809772,7.3661272],[-9.4817229,7.3669383],[-9.4821389,7.3670154],[-9.4823192,7.3670423],[-9.4821032,7.3685109],[-9.4821735,7.3692851],[-9.4821104,7.3697402],[-9.4820244,7.3705542],[-9.4813761,7.3719518],[-9.4808459,7.3728039],[-9.480836,7.3736069],[-9.4814106,7.3745658],[-9.4821598,7.3752017],[-9.4827861,7.3754195],[-9.4837712,7.3756007],[-9.4841374,7.3757998],[-9.4843338,7.376135],[-9.4844362,7.3765486],[-9.48436,7.3772027],[-9.4843266,7.37758],[-9.484128,7.3779709],[-9.4835147,7.3784904],[-9.4820633,7.3791784],[-9.4796492,7.3802821],[-9.4787298,7.3814189],[-9.4782321,7.3823446],[-9.4775236,7.3841776],[-9.4768579,7.385564],[-9.4768849,7.3866465],[-9.4767125,7.3874809],[-9.4764949,7.3880284],[-9.476081,7.3885156],[-9.4758069,7.3901506],[-9.4760669,7.3910108],[-9.476134,7.3916974],[-9.4759351,7.3929381],[-9.4757116,7.393757],[-9.4750813,7.3944173],[-9.4744895,7.3948209],[-9.4739809,7.3952398],[-9.4735648,7.396851],[-9.4737364,7.3984109],[-9.4735083,7.3994156],[-9.4729308,7.4007898],[-9.4721965,7.4023099],[-9.4718572,7.4033373],[-9.4713136,7.4044081],[-9.4707181,7.404926],[-9.4703417,7.4053201],[-9.4698785,7.4058031],[-9.4701391,7.4067749],[-9.4700734,7.4079023],[-9.470355,7.4087322],[-9.4702901,7.409194],[-9.4707181,7.4103908],[-9.4706829,7.4108127],[-9.4708244,7.4114664],[-9.4714088,7.4121297],[-9.4718047,7.4127345],[-9.4719249,7.4131294],[-9.4717989,7.4135212],[-9.4715569,7.4140693],[-9.4710549,7.4146403],[-9.4707184,7.415191],[-9.4705116,7.4163198],[-9.4702486,7.4171194],[-9.4698427,7.4178647],[-9.4693879,7.4183571],[-9.4687537,7.4185316],[-9.4676988,7.4185472],[-9.466527,7.4184471],[-9.466116,7.418622],[-9.4658334,7.4189099],[-9.4656821,7.4193134],[-9.4657217,7.4197562],[-9.4660893,7.4202208],[-9.4668482,7.4209804],[-9.4681297,7.4216509],[-9.4687568,7.4221081],[-9.468893,7.422574],[-9.468898,7.4230931],[-9.4688363,7.4239632],[-9.468536,7.425298],[-9.4681522,7.4289229],[-9.4680571,7.4297827],[-9.467676,7.4304644],[-9.4667247,7.4312243],[-9.4660289,7.4318616],[-9.4651654,7.4327872],[-9.4645916,7.4331606],[-9.4640745,7.4336445],[-9.4641111,7.4339025],[-9.4642351,7.4347762],[-9.463869,7.4353573],[-9.4637406,7.4362953],[-9.4635979,7.4369589],[-9.4630816,7.4375535],[-9.4625195,7.4379814],[-9.4621217,7.4383418],[-9.4617082,7.4387355],[-9.4611339,7.439254],[-9.4601855,7.4401103],[-9.459568,7.4408253],[-9.4593998,7.4411229],[-9.4594793,7.4415651],[-9.459754,7.4420125],[-9.4598392,7.4428072],[-9.459842,7.4434252],[-9.4597894,7.4436826],[-9.4597489,7.4440431],[-9.4594563,7.4446415],[-9.4592517,7.4450581],[-9.4586001,7.4455529],[-9.4578862,7.4462071],[-9.4579789,7.4472706],[-9.4576773,7.4480511],[-9.4569847,7.4488237],[-9.4564479,7.4501205],[-9.4564596,7.4505763],[-9.4563088,7.4507869],[-9.4560483,7.4508146],[-9.4558046,7.4507481],[-9.455616,7.4506966],[-9.4553299,7.4506583],[-9.4549408,7.4506575],[-9.4545739,7.4506307],[-9.4542645,7.4505276],[-9.4538882,7.4503914],[-9.4534372,7.4502362],[-9.453045,7.4504445],[-9.4526613,7.4509405],[-9.4518995,7.4520063],[-9.4514328,7.4521563],[-9.4508445,7.4520609],[-9.4492273,7.4515448],[-9.449031,7.451373],[-9.4488766,7.4510328],[-9.448786,7.450538],[-9.4485749,7.4504284],[-9.4479124,7.4503687],[-9.4474284,7.4504966],[-9.4472114,7.4507255],[-9.4470765,7.4509734],[-9.4467867,7.452009],[-9.4467654,7.4531329],[-9.4467975,7.4537504],[-9.4467983,7.4540453],[-9.4467398,7.454467],[-9.446216,7.4546313],[-9.4457676,7.4547142],[-9.4452691,7.4547531],[-9.4447709,7.4547516],[-9.4439978,7.4546588],[-9.4430717,7.4548166],[-9.4422493,7.4551111],[-9.4415177,7.4556461],[-9.4411981,7.4562199],[-9.4410959,7.4568261],[-9.4412909,7.4579779],[-9.441329,7.4582927],[-9.4411364,7.4586234],[-9.4402262,7.4590817],[-9.4400083,7.4591914],[-9.4396659,7.4598894],[-9.4391444,7.4608315],[-9.43882,7.4616108],[-9.4383026,7.46181],[-9.4379739,7.4618197],[-9.4377771,7.4618022],[-9.4376648,7.4616496],[-9.4373063,7.4614216],[-9.4368549,7.462306],[-9.4365457,7.4629207],[-9.4362589,7.4631614],[-9.4359024,7.4635248],[-9.4355692,7.4638502],[-9.4354989,7.4640781],[-9.4354077,7.4647197],[-9.4352725,7.4653031],[-9.4350073,7.4659057],[-9.4344909,7.4659206],[-9.4341084,7.4664842],[-9.4335434,7.4666665],[-9.4331751,7.4672718],[-9.4322902,7.4671949],[-9.4313421,7.4666765],[-9.4306227,7.4666392],[-9.430199,7.4668912],[-9.4297444,7.4673945],[-9.4288136,7.4687602],[-9.4285396,7.4694923],[-9.4278927,7.4700477],[-9.4256072,7.471902],[-9.4248967,7.4728941],[-9.4247691,7.4734219],[-9.4248718,7.4739198],[-9.4252416,7.4746634],[-9.4256699,7.4756879],[-9.4258188,7.4761721],[-9.4257696,7.4766672],[-9.4255516,7.4770996],[-9.4251314,7.477727],[-9.4242657,7.4785335],[-9.4234462,7.4794234],[-9.42231,7.4813349],[-9.4218302,7.4819353],[-9.4213102,7.4824706],[-9.4204731,7.4838943],[-9.4196451,7.4856489],[-9.4189601,7.4872634],[-9.4184176,7.489465],[-9.4184521,7.4902968],[-9.4183432,7.4915173],[-9.4181506,7.4920542],[-9.4179778,7.4924659],[-9.4178186,7.4926813],[-9.417432,7.4928483],[-9.416759,7.4932682],[-9.4165126,7.493554],[-9.416298,7.493903],[-9.4161173,7.494303],[-9.4159816,7.4956406],[-9.4150411,7.4970846],[-9.4156241,7.4975255],[-9.4163333,7.496989],[-9.4167781,7.4971636],[-9.4168136,7.497078],[-9.4168337,7.4973251],[-9.4171255,7.4974376],[-9.4171579,7.4975686],[-9.4171428,7.4977868],[-9.4170752,7.4979619],[-9.4167609,7.4982743],[-9.4164149,7.4990517],[-9.4160855,7.4996069],[-9.4160402,7.4997684],[-9.4159869,7.4999586],[-9.4151982,7.5021418],[-9.4146319,7.5039145],[-9.4138696,7.5059381],[-9.4134081,7.5075428],[-9.4130312,7.5078875],[-9.4124254,7.5091245],[-9.4105747,7.5089953],[-9.4096372,7.5089298],[-9.4085905,7.5111917],[-9.4086173,7.5137995],[-9.4068458,7.5162742],[-9.4063358,7.5192545],[-9.4049213,7.5241993],[-9.4041575,7.5263631],[-9.4037433,7.5281851],[-9.403276,7.5298984],[-9.4033565,7.5325859],[-9.400914,7.536524],[-9.4008067,7.5402492],[-9.4002999,7.5407952],[-9.399786,7.5420221],[-9.3993559,7.5424844],[-9.3988805,7.5424306],[-9.3982919,7.5415509],[-9.3974453,7.5415957],[-9.3959908,7.5420952],[-9.3952506,7.5430165],[-9.3944723,7.5448525],[-9.3946065,7.546582],[-9.3912245,7.5529945],[-9.3903656,7.5553892],[-9.3871716,7.5574114],[-9.3845949,7.5637706],[-9.3834294,7.5648605],[-9.3836286,7.5662716],[-9.3849438,7.569358],[-9.3846323,7.5705828],[-9.3845843,7.5717348],[-9.3845144,7.5745729],[-9.3837365,7.5771726],[-9.3817298,7.5793841],[-9.3791556,7.5807378],[-9.3777237,7.5819162],[-9.376999,7.5835626],[-9.3776842,7.5858719],[-9.3787369,7.5866466],[-9.3785612,7.5884487],[-9.3778326,7.5894062],[-9.3769542,7.590407],[-9.3762206,7.5919732],[-9.3741539,7.592931],[-9.3719529,7.5932768],[-9.3708327,7.5955222],[-9.3702083,7.5963174],[-9.3690642,7.5973721],[-9.3682569,7.5981843],[-9.3679042,7.5992813],[-9.3682841,7.5999435],[-9.3683224,7.6005288],[-9.3680622,7.600859],[-9.3671386,7.6009308],[-9.3664335,7.6012837],[-9.3661324,7.601761],[-9.3662073,7.6029304],[-9.3673095,7.6053555],[-9.3666385,7.6075104],[-9.3659943,7.6084416],[-9.3660748,7.6101709],[-9.3654307,7.610703],[-9.3645838,7.611144],[-9.3643497,7.6124192],[-9.3639803,7.613648],[-9.3629377,7.6139233],[-9.35918,7.6130719],[-9.3589653,7.6177542],[-9.3585358,7.6197761],[-9.3599315,7.6220108],[-9.3583211,7.625416],[-9.3589653,7.6277571],[-9.3647629,7.62797],[-9.3672697,7.626557],[-9.3688265,7.626557],[-9.369578,7.6275679],[-9.3694706,7.6285256],[-9.3686117,7.6300154],[-9.3689874,7.6307337],[-9.3711884,7.6298824],[-9.372101,7.6304676],[-9.3713225,7.6326225],[-9.3714836,7.6338728],[-9.3724498,7.6341122],[-9.3733087,7.634192],[-9.3739261,7.6359744],[-9.375456,7.6377568],[-9.3762075,7.6389805],[-9.3758854,7.6409757],[-9.3760196,7.643423],[-9.3773348,7.6453917],[-9.3787307,7.6469079],[-9.3782207,7.6483976],[-9.3766102,7.6514568],[-9.3765296,7.6527603],[-9.3783279,7.6564047],[-9.3796968,7.6575219],[-9.379831,7.6585594],[-9.3796163,7.659384],[-9.3783011,7.6600756],[-9.3772543,7.6612727],[-9.3758586,7.6615121],[-9.374946,7.6626826],[-9.3746449,7.6632795],[-9.3740066,7.6645446],[-9.3735771,7.6657683],[-9.372262,7.6667791],[-9.3722351,7.6677899],[-9.3728793,7.6683485],[-9.3751339,7.6681623],[-9.3757781,7.6689869],[-9.3758586,7.6755306],[-9.3739798,7.6802122],[-9.3750534,7.6818614],[-9.3753486,7.6840958],[-9.3745166,7.6865962],[-9.3747313,7.691251],[-9.3737919,7.6927406],[-9.3736845,7.6948685],[-9.3723962,7.6982732],[-9.3716983,7.6992307],[-9.3704636,7.7012522],[-9.3687727,7.7029811],[-9.3676185,7.7033801],[-9.3670549,7.7071571],[-9.3657934,7.7093647],[-9.3641829,7.7107212],[-9.3626883,7.7142548],[-9.362903,7.7174465],[-9.356998,7.7214893],[-9.3562465,7.7236171],[-9.356998,7.726064],[-9.3562465,7.7293621],[-9.3550655,7.7309579],[-9.3547434,7.7324473],[-9.356676,7.7353197],[-9.3492241,7.7464729],[-9.352878,7.7521506],[-9.353568,7.7529206],[-9.354773,7.7535456],[-9.356418,7.7538456],[-9.357402,7.7545436],[-9.357762,7.7556026],[-9.358155,7.7572466],[-9.35895,7.7591106],[-9.360077,7.7603566],[-9.3611,7.7606896],[-9.361637,7.7628076],[-9.3617397,7.7634263],[-9.3619385,7.7651144],[-9.3608755,7.7654384],[-9.3599215,7.7659444],[-9.3592955,7.7665614],[-9.3591435,7.7676554],[-9.3593925,7.7689334],[-9.3599685,7.7706504],[-9.3606565,7.7718944],[-9.3602815,7.7735344],[-9.3602375,7.7749204],[-9.3605095,7.7785694],[-9.3614175,7.7798504],[-9.3621845,7.7801464],[-9.3631715,7.7802234],[-9.3646025,7.7795374],[-9.3663655,7.7783784],[-9.3676865,7.7778364],[-9.3682695,7.7782044],[-9.3681175,7.7792614],[-9.3674115,7.7812284],[-9.3673285,7.7829424],[-9.3673945,7.7842564],[-9.3673845,7.7860434],[-9.3670855,7.7871734],[-9.3666775,7.7881204],[-9.3666715,7.7893234],[-9.3669955,7.7901644],[-9.3679055,7.7910074],[-9.3684495,7.7919584],[-9.3684035,7.7937094],[-9.3691705,7.7939684],[-9.3695705,7.7943354],[-9.3692735,7.7952094],[-9.3695945,7.7965974],[-9.3700645,7.7977304],[-9.3706095,7.7984624],[-9.3738285,7.7986594],[-9.3751385,7.8001614],[-9.3754255,7.8010384],[-9.3754545,7.8024974],[-9.3751915,7.8037734],[-9.3758465,7.8043604],[-9.3769795,7.8047664],[-9.3781125,7.8049174],[-9.3786545,7.8061604],[-9.3785355,7.8079844],[-9.3785655,7.8090424],[-9.3791105,7.8097374],[-9.3803905,7.8100354],[-9.3817825,7.8096774],[-9.3830695,7.8086614],[-9.3855415,7.8050974],[-9.3860935,7.8044434],[-9.3886565,7.8043094],[-9.3896095,7.8040944],[-9.3915185,7.8028634],[-9.3924015,7.8020284],[-9.3936825,7.8021434],[-9.3945925,7.8030594],[-9.3958635,7.8047434],[-9.3973555,7.8063184],[-9.3978605,7.8076714],[-9.3981425,7.8096054],[-9.3986135,7.8106294],[-9.3998525,7.8115474],[-9.4008355,7.8124634],[-9.4011945,7.8136694],[-9.4011505,7.8151284],[-9.4007675,7.8181544],[-9.4008625,7.8208904],[-9.4014415,7.8221704],[-9.4023835,7.8239254],[-9.4030026,7.8243664],[-9.4049806,7.8241564],[-9.4058566,7.8245984],[-9.4069125,7.8256244],[-9.4080365,7.8275634],[-9.4091255,7.8291734],[-9.4099995,7.8300524],[-9.4110966,7.8301674],[-9.4123415,7.8299904],[-9.4132875,7.8311614],[-9.4157036,7.8310264],[-9.4164315,7.8318324],[-9.4166446,7.8329644],[-9.4166485,7.8389474],[-9.4167446,7.8414654],[-9.4172476,7.8431824],[-9.4182645,7.8446824],[-9.4194296,7.8457814],[-9.4215106,7.8468124],[-9.4222036,7.8472904],[-9.4231796,7.8494834],[-9.4237976,7.8502154],[-9.4262136,7.8502994],[-9.4267585,7.8509954],[-9.4273756,7.8519094],[-9.4282086,7.8535554],[-9.4284556,7.8553434],[-9.4288476,7.8573524],[-9.4289886,7.8583374],[-9.4300116,7.8586344],[-9.4315496,7.8584584],[-9.4321666,7.8595554],[-9.4322716,7.8603954],[-9.4321156,7.8620724],[-9.4322926,7.8633134],[-9.4329426,7.8648494],[-9.4324926,7.8668894],[-9.4324496,7.8680934],[-9.4326976,7.8695544],[-9.4331676,7.8706504],[-9.4330896,7.8715984],[-9.4322796,7.8724344],[-9.4316526,7.8733794],[-9.4312426,7.8747644],[-9.4313456,7.8760414],[-9.4319616,7.8770294],[-9.4331316,7.8773264],[-9.4351826,7.8771164],[-9.4356566,7.8775204],[-9.4364466,7.8803694],[-9.4365136,7.8814634],[-9.4372016,7.8828534],[-9.4382176,7.8845724],[-9.4383066,7.8883664],[-9.4396116,7.8908534],[-9.4397146,7.8920574],[-9.4394176,7.8928224],[-9.4383116,7.8942404],[-9.4384906,7.8951164],[-9.4386626,7.8970144],[-9.4384006,7.8982174],[-9.4378076,7.8995274],[-9.4367746,7.9009454],[-9.4367676,7.9023324],[-9.4370156,7.9039014],[-9.4369706,7.9055064],[-9.4365966,7.9069284],[-9.4350806,7.9096204],[-9.4343606,7.9143234],[-9.4352315,7.9157134],[-9.4366195,7.9162304],[-9.4377515,7.9167104],[-9.4378475,7.9193734],[-9.4394875,7.9207674],[-9.4402145,7.9216094],[-9.4407205,7.9228514],[-9.4408985,7.9238014],[-9.4409275,7.9252244],[-9.4400395,7.9269344],[-9.4394105,7.9282814],[-9.4394415,7.9292664],[-9.4398035,7.9301074],[-9.4424285,7.9320524],[-9.4431185,7.9331134],[-9.4435115,7.9349034],[-9.4436475,7.9368374],[-9.4429725,7.9398254],[-9.4424905,7.9409544],[-9.4417895,7.9420454],[-9.4408325,7.9429894],[-9.4383315,7.9450214],[-9.4378485,7.9464424],[-9.4366665,7.9484074],[-9.4364385,7.9499384],[-9.4370145,7.9516924],[-9.4377025,7.9531174],[-9.4377975,7.9559274],[-9.4384875,7.9569154],[-9.4413655,7.9596274],[-9.4421285,7.9607984],[-9.4423435,7.9615654],[-9.4421555,7.9625134],[-9.4416365,7.9636784],[-9.4416655,7.9651744],[-9.4420935,7.9672914],[-9.4421565,7.9691164],[-9.4418945,7.9701724],[-9.4413765,7.9711554],[-9.4411895,7.9719574],[-9.4425645,7.9751004],[-9.4425935,7.9764874],[-9.4422955,7.9773614],[-9.4413745,7.9784154],[-9.4404875,7.9799074],[-9.4401515,7.9812554],[-9.4389215,7.9852994],[-9.4382915,7.9866464],[-9.4375885,7.9879934],[-9.4358215,7.9898094],[-9.4347915,7.9906804],[-9.4339805,7.9916984],[-9.4333525,7.9926804],[-9.4325755,7.9942094],[-9.4318015,7.9952634],[-9.4306965,7.9964994],[-9.4298155,7.9969334],[-9.4282025,7.9972904],[-9.4257115,7.9974984],[-9.4225995,8.0001564],[-9.4217295,8.0013584],[-9.4209896,8.0026884],[-9.4207176,8.0028954],[-9.4200816,8.0035934],[-9.4187446,8.0047304],[-9.4184716,8.0050534],[-9.4184066,8.0058284],[-9.4182906,8.0063454],[-9.4180436,8.0068624],[-9.4173556,8.0081024],[-9.4168236,8.0088774],[-9.4161876,8.0095624],[-9.4158636,8.0102334],[-9.4155526,8.0121964],[-9.4151106,8.0131014],[-9.4149296,8.0133724],[-9.4146696,8.0135794],[-9.4140986,8.0137084],[-9.4129686,8.0137354],[-9.4122416,8.0140714],[-9.4111906,8.0147304],[-9.4105276,8.0150414],[-9.4100476,8.0153904],[-9.4084116,8.0167344],[-9.4068536,8.0178334],[-9.4064516,8.0180274],[-9.4060366,8.0184274],[-9.4057506,8.0187764],[-9.4053226,8.0193964],[-9.4050756,8.0199004],[-9.4047256,8.0203394],[-9.4047386,8.0210624],[-9.4053626,8.0256594],[-9.4052976,8.0261764],[-9.4056616,8.0263044],[-9.4060906,8.0265754],[-9.4082076,8.0281884],[-9.4085706,8.0284984],[-9.4087266,8.0287434],[-9.4087916,8.0291434],[-9.4087656,8.0296084],[-9.4085196,8.0306154],[-9.4084936,8.0314294],[-9.4083766,8.0319464],[-9.4081566,8.0321654],[-9.4079486,8.0324624],[-9.4079096,8.0329404],[-9.4080006,8.0335084],[-9.4081306,8.0337924],[-9.4080266,8.0341284],[-9.4081436,8.0342964],[-9.4080786,8.0345804],[-9.4077936,8.0353164],[-9.4073266,8.0359624],[-9.4068326,8.0369444],[-9.4064956,8.0379904],[-9.4062756,8.0395404],[-9.4062626,8.0407024],[-9.4063666,8.0410894],[-9.4063536,8.0418004],[-9.4064576,8.0424324],[-9.4064456,8.0438534],[-9.4061986,8.0450024],[-9.4060426,8.0454414],[-9.4059396,8.0461004],[-9.4056796,8.0471724],[-9.4055886,8.0477274],[-9.4055636,8.0484124],[-9.4057196,8.0496904],[-9.4058756,8.0501554],[-9.4061616,8.0506974],[-9.4065116,8.0511874],[-9.4072136,8.0520134],[-9.4075126,8.0525294],[-9.4077586,8.0528004],[-9.4081616,8.0529554],[-9.4085516,8.0531874],[-9.4093696,8.0539494],[-9.4100446,8.0548394],[-9.4103696,8.0553424],[-9.4111366,8.0562464],[-9.4113176,8.0565814],[-9.4115776,8.0572784],[-9.4115656,8.0582864],[-9.4114616,8.0587514],[-9.4113186,8.0590864],[-9.4103186,8.0601854],[-9.4094106,8.0609094],[-9.4100416,8.0608624],[-9.4107256,8.0609834],[-9.4117066,8.0614094],[-9.4126366,8.0622114],[-9.4136676,8.0628504],[-9.4143216,8.0630934],[-9.4157826,8.0635094],[-9.4166606,8.0635794],[-9.4173656,8.0636904],[-9.4177946,8.0638324],[-9.4191016,8.0643494],[-9.4199396,8.0648064],[-9.4201536,8.0650194],[-9.4210116,8.0649984],[-9.4221046,8.0647024],[-9.4227376,8.0644184],[-9.4245866,8.0633804],[-9.4253626,8.0630044],[-9.4267716,8.0624654],[-9.4273536,8.0623734],[-9.4279156,8.0622204],[-9.4283746,8.0619964],[-9.4290896,8.0615084],[-9.4296616,8.0609694],[-9.4300086,8.0607154],[-9.4303766,8.0605524],[-9.4312136,8.0603594],[-9.4328576,8.0592514],[-9.4333276,8.0590474],[-9.4350846,8.0588124],[-9.4356566,8.0587104],[-9.4361566,8.0585674],[-9.4370446,8.0580694],[-9.4375456,8.0576124],[-9.4382906,8.0566974],[-9.4387706,8.0562704],[-9.4391896,8.0559854],[-9.4400876,8.0556504],[-9.4426306,8.0552514],[-9.4431716,8.0550894],[-9.4436006,8.0548854],[-9.4446526,8.0541534],[-9.4454696,8.0534014],[-9.4460206,8.0530554],[-9.4462866,8.0529234],[-9.4470626,8.0526894],[-9.4479306,8.0523534],[-9.4484306,8.0520684],[-9.4488596,8.0519974],[-9.4493196,8.0517934],[-9.4505346,8.0510714],[-9.4509536,8.0509694],[-9.4517496,8.0504914],[-9.4524236,8.0501664],[-9.4530566,8.0497794],[-9.4535266,8.0494134],[-9.4539956,8.0489464],[-9.4547106,8.0479804],[-9.4548736,8.0475744],[-9.4550366,8.0458374],[-9.4559956,8.0436934],[-9.4563326,8.0433784],[-9.4572826,8.0426264],[-9.4577006,8.0424124],[-9.4582416,8.0422694],[-9.4589466,8.0422794],[-9.4593756,8.0424314],[-9.4597746,8.0427254],[-9.4601826,8.0431314],[-9.4608066,8.0443704],[-9.4613066,8.0449894],[-9.4613896,8.0455484],[-9.4612186,8.0459614],[-9.4612186,8.0463754],[-9.4617936,8.0473344],[-9.4618676,8.0477964],[-9.4618546,8.0481364],[-9.4616236,8.0489024],[-9.4616476,8.0499354],[-9.4615746,8.0502384],[-9.4610616,8.0514664],[-9.4606226,8.0521594],[-9.4603166,8.0524634],[-9.4593026,8.0531574],[-9.4587776,8.0536434],[-9.4576786,8.0544954],[-9.4572506,8.0546414],[-9.4564806,8.0553954],[-9.4555646,8.0567574],[-9.4550766,8.0581554],[-9.4546126,8.0586904],[-9.4537576,8.0594074],[-9.4533546,8.0599184],[-9.4526336,8.0612194],[-9.4525116,8.0616204],[-9.4524386,8.0621434],[-9.4516936,8.0634314],[-9.4511806,8.0640524],[-9.4499716,8.0653654],[-9.4494946,8.0661554],[-9.4492506,8.0664714],[-9.4482976,8.0674084],[-9.4475896,8.0682354],[-9.4475766,8.0684294],[-9.4476996,8.0692924],[-9.4476756,8.0695234],[-9.4472236,8.0704104],[-9.4467106,8.0710064],[-9.4454766,8.0717124],[-9.4453666,8.0718944],[-9.4452076,8.0723324],[-9.4450366,8.0733534],[-9.4444626,8.0743254],[-9.4442546,8.0745684],[-9.4438156,8.0757114],[-9.4432296,8.0775104],[-9.4428756,8.0784224],[-9.4424476,8.0790544],[-9.4418006,8.0797714],[-9.4415686,8.0801124],[-9.4413606,8.0805864],[-9.4409096,8.0821424],[-9.4408366,8.0831024],[-9.4408976,8.0835154],[-9.4410566,8.0839894],[-9.4413136,8.0842194],[-9.4416916,8.0844864],[-9.4421326,8.0847174],[-9.4436236,8.0853724],[-9.4443326,8.0857364],[-9.4451756,8.0863674],[-9.4457256,8.0870964],[-9.4459096,8.0874604],[-9.4460196,8.0878254],[-9.4464236,8.0885294],[-9.4467536,8.0889544],[-9.4476696,8.0896224],[-9.4478416,8.0899384],[-9.4479516,8.0903634],[-9.4479636,8.0908974],[-9.4478296,8.0914444],[-9.4473776,8.0926364],[-9.4470726,8.0931344],[-9.4467546,8.0940824],[-9.4467556,8.0949694],[-9.4469146,8.0953344],[-9.4472936,8.0958564],[-9.4476606,8.0963304],[-9.4480396,8.0967304],[-9.4485286,8.0970824],[-9.4500196,8.0979194],[-9.4503746,8.0982234],[-9.4505816,8.0986004],[-9.4509856,8.0997294],[-9.4511936,8.1001794],[-9.4514626,8.1006284],[-9.4519396,8.1012964],[-9.4531256,8.1031544],[-9.4535176,8.1034944],[-9.4539936,8.1040654],[-9.4541656,8.1043564],[-9.4543856,8.1050254],[-9.4545696,8.1062404],[-9.4549236,8.1073214],[-9.4551076,8.1080504],[-9.4553156,8.1085724],[-9.4560126,8.1098604],[-9.4563436,8.1109534],[-9.4565516,8.1121924],[-9.4566496,8.1124604],[-9.4566736,8.1130434],[-9.4563686,8.1135174],[-9.4556236,8.1141014],[-9.4550366,8.1141994],[-9.4545846,8.1143694],[-9.4541936,8.1145404],[-9.4536806,8.1148684],[-9.4533256,8.1151114],[-9.4528126,8.1155984],[-9.4527156,8.1159634],[-9.4529596,8.1161454],[-9.4537906,8.1165944],[-9.4541576,8.1168614],[-9.4547446,8.1174194],[-9.4549276,8.1178084],[-9.4552706,8.1189134],[-9.4556746,8.1195454],[-9.4559186,8.1201894],[-9.4559196,8.1205784],[-9.4556996,8.1223154],[-9.455656,8.1229785],[-9.4556516,8.1230454],[-9.4554316,8.1238234],[-9.4552846,8.1241634],[-9.4543566,8.1257194],[-9.4540696,8.1261303],[-9.4537706,8.1265584],[-9.4527196,8.1275804],[-9.4507396,8.1286514],[-9.4504309,8.128951],[-9.4502636,8.1291134],[-9.4499946,8.1295144],[-9.4497386,8.1300124],[-9.4495306,8.1306084],[-9.4492866,8.1313504],[-9.4490056,8.1324434],[-9.4489816,8.1328324],[-9.4490546,8.1331604],[-9.4491896,8.1335004],[-9.4493606,8.1336954],[-9.4503266,8.1342534],[-9.4508156,8.1344834],[-9.4514876,8.1342524],[-9.4534916,8.1332424],[-9.4543106,8.1332294],[-9.4548606,8.1333014],[-9.4562666,8.1336894],[-9.4568776,8.1337254],[-9.4579656,8.1345754],[-9.4583566,8.1347694],[-9.4587606,8.1348784],[-9.4602396,8.1349864],[-9.4607896,8.1352044],[-9.4612046,8.1352524],[-9.4623176,8.1355314],[-9.4626716,8.1357014],[-9.4633816,8.1363564],[-9.4637116,8.1368184],[-9.4640296,8.1376924],[-9.4640056,8.1391264],[-9.4637856,8.1397584],[-9.4633826,8.1402084],[-9.4629796,8.1404404],[-9.4624176,8.1406594],[-9.4620266,8.1407084],[-9.4613906,8.1407084],[-9.4613691,8.1412606],[-9.4594941,8.1598906],[-9.4594221,8.1616646],[-9.4622511,8.1764996],[-9.4625331,8.1770336],[-9.4629121,8.1771436],[-9.4633391,8.1770816],[-9.4645251,8.1767166],[-9.4649531,8.1765576],[-9.4655031,8.1762416],[-9.4656741,8.1761926],[-9.4659921,8.1762416],[-9.4667251,8.1764716],[-9.4671651,8.1769576],[-9.4673861,8.1776496],[-9.4673621,8.1789986],[-9.4674231,8.1793026],[-9.4675701,8.1795206],[-9.4681811,8.1799696],[-9.4689511,8.1798356],[-9.4705891,8.1797736],[-9.4713841,8.1796506],[-9.4727771,8.1793336],[-9.4731071,8.1791876],[-9.4734501,8.1791026],[-9.4737551,8.1788836],[-9.4740851,8.1787376],[-9.4750021,8.1784816],[-9.4759181,8.1784076],[-9.4761631,8.1784436],[-9.4764321,8.1785896],[-9.4770431,8.1792206],[-9.4771901,8.1795366],[-9.4774591,8.1798276],[-9.4777651,8.1800216],[-9.4782051,8.1802646],[-9.4793301,8.1807376],[-9.4797461,8.1808956],[-9.4800881,8.1809196],[-9.4803451,8.1808706],[-9.4817131,8.1800426],[-9.4822631,8.1797626],[-9.4845611,8.1788496],[-9.4850871,8.1785936],[-9.4855141,8.1782526],[-9.4858071,8.1779006],[-9.4860271,8.1774266],[-9.4861371,8.1770856],[-9.4861401,8.1762246],[-9.4861981,8.1760866],[-9.4864001,8.1759256],[-9.4867341,8.1757836],[-9.4884151,8.1758326],[-9.4894791,8.1760436],[-9.4909981,8.1760316],[-9.4921011,8.1755076],[-9.4929831,8.1754556],[-9.4934691,8.1755056],[-9.4938131,8.1756966],[-9.4939761,8.1772166],[-9.4938041,8.1788476],[-9.4934711,8.1800366],[-9.4934921,8.1811136],[-9.4934411,8.1816266],[-9.4933101,8.1819896],[-9.4933001,8.1825026],[-9.4933711,8.1830666],[-9.4936451,8.1841336],[-9.4937981,8.1856836],[-9.4939301,8.1861466],[-9.4941321,8.1864286],[-9.4947401,8.1869006],[-9.4950441,8.1869206],[-9.4964621,8.1865566],[-9.4972821,8.1862946],[-9.4987911,8.1860106],[-9.4999451,8.1855566],[-9.5006171,8.1853566],[-9.5013731,8.1851966],[-9.5015561,8.1850026],[-9.5018531,8.1848656],[-9.5028611,8.1845446],[-9.5033421,8.1844986],[-9.5036971,8.1843846],[-9.5055181,8.1844386],[-9.5065371,8.1838686],[-9.5070061,8.1837306],[-9.5077851,8.1837066],[-9.5081971,8.1837406],[-9.5095611,8.1840356],[-9.5116571,8.1849326],[-9.5125751,8.1861166],[-9.5128961,8.1863776],[-9.5130681,8.1865946],[-9.5133321,8.1872086],[-9.5139741,8.1879256],[-9.5143411,8.1881986],[-9.5147881,8.1883696],[-9.5152571,8.1886536],[-9.5154991,8.1893256],[-9.5155221,8.1898836],[-9.5154431,8.1907606],[-9.5154791,8.1919686],[-9.5156051,8.1929366],[-9.5158351,8.1937566],[-9.5158011,8.1941556],[-9.5154471,8.1947606],[-9.5147841,8.1955356],[-9.5146121,8.1956386],[-9.5144631,8.1956156],[-9.5136281,8.1969616],[-9.5131481,8.1975546],[-9.5123471,8.1989116],[-9.5116041,8.2003136],[-9.5114791,8.2006666],[-9.5115371,8.2016586],[-9.5107251,8.2027076],[-9.5105881,8.2027416],[-9.5101411,8.2031296],[-9.5094431,8.2036096],[-9.5084701,8.2036216],[-9.5083321,8.2036676],[-9.5081831,8.2038046],[-9.5079891,8.2040216],[-9.5078861,8.2043066],[-9.5075901,8.2057996],[-9.5073721,8.2060956],[-9.5070181,8.2064266],[-9.5066401,8.2067006],[-9.5059071,8.2070206],[-9.5048771,8.2077736],[-9.5043511,8.2084806],[-9.5039401,8.2093356],[-9.5037121,8.2103156],[-9.5037231,8.2105776],[-9.5038041,8.2108396],[-9.5043421,8.2112036],[-9.5052821,8.2113966],[-9.5055001,8.2115666],[-9.5056721,8.2117836],[-9.5057521,8.2124206],[-9.5056041,8.2127626],[-9.5039001,8.2154536],[-9.5029971,8.2176546],[-9.5030211,8.2182006],[-9.5033771,8.2189066],[-9.5035831,8.2191006],[-9.5044541,8.2193156],[-9.5047291,8.2194976],[-9.5052681,8.2200896],[-9.5053831,8.2204086],[-9.5054171,8.2206476],[-9.5053491,8.2210006],[-9.5052801,8.2212176],[-9.5047541,8.2221976],[-9.5045721,8.2229726],[-9.5048011,8.2232456],[-9.5054901,8.2242816],[-9.5058451,8.2249646],[-9.5061891,8.2253976],[-9.5064301,8.2256136],[-9.5066021,8.2260696],[-9.5065571,8.2267756],[-9.5063641,8.2276536],[-9.5061011,8.2284056],[-9.5053921,8.2298076],[-9.5052551,8.2299676],[-9.5043621,8.2307316],[-9.5039621,8.2312226],[-9.5030821,8.2330236],[-9.5019031,8.2347566],[-9.5016291,8.2350646],[-9.5010681,8.2355216],[-9.5001301,8.2364566],[-9.4999931,8.2367766],[-9.4998791,8.2373916],[-9.4998911,8.2379836],[-9.4999711,8.2382346],[-9.5002351,8.2385306],[-9.5004071,8.2388376],[-9.5006361,8.2391106],[-9.5008661,8.2393046],[-9.5011521,8.2394176],[-9.5017361,8.2393376],[-9.5020571,8.2392236],[-9.5025721,8.2391886],[-9.5028361,8.2392676],[-9.5034091,8.2393016],[-9.5035691,8.2394486],[-9.5039131,8.2394146],[-9.5042341,8.2396076],[-9.5044971,8.2396306],[-9.5049561,8.2398916],[-9.5067771,8.2402426],[-9.5075451,8.2404806],[-9.5085081,8.2409236],[-9.5101691,8.2415026],[-9.5112001,8.2417066],[-9.5117501,8.2417056],[-9.5122311,8.2415686],[-9.5122201,8.2417396],[-9.5113281,8.2430736],[-9.5111681,8.2434956],[-9.5108131,8.2442026],[-9.5106071,8.2443846],[-9.5104241,8.2444756],[-9.5096571,8.2446596],[-9.5091991,8.2448766],[-9.5083061,8.2458116],[-9.5079061,8.2464506],[-9.5074031,8.2468496],[-9.5071851,8.2468956],[-9.5063721,8.2469086],[-9.5056161,8.2472506],[-9.5053991,8.2474336],[-9.5050331,8.2479466],[-9.5046901,8.2486076],[-9.5046331,8.2490406],[-9.5044041,8.2495996],[-9.5043361,8.2500556],[-9.5043721,8.2509296],[-9.5042801,8.2512276],[-9.5040881,8.2515356],[-9.5036041,8.2520906],[-9.5033021,8.2523386],[-9.5018941,8.2531976],[-9.5013411,8.2535836],[-9.5008371,8.2541296],[-9.5005361,8.2542766],[-9.4998341,8.2544726],[-9.4994101,8.2550186],[-9.4986651,8.2556626],[-9.4980221,8.2560076],[-9.4976801,8.2562546],[-9.4973781,8.2565716],[-9.4966911,8.2575546],[-9.4960531,8.2587176],[-9.4958611,8.2589956],[-9.4942681,8.2606906],[-9.4932211,8.2615326],[-9.4928281,8.2619186],[-9.4924951,8.2623256],[-9.4916261,8.2636066],[-9.4909711,8.2642306],[-9.4902281,8.2645956],[-9.4898881,8.2645736],[-9.4895361,8.2648416],[-9.4893641,8.2650296],[-9.4891011,8.2655866],[-9.4889711,8.2670006],[-9.4889901,8.2673196],[-9.4890681,8.2675596],[-9.4892071,8.2677896],[-9.4894861,8.2679506],[-9.4896651,8.2681706],[-9.4897951,8.2713406],[-9.4902481,8.2726886],[-9.4905981,8.2743146],[-9.4909341,8.2749946],[-9.4911031,8.2751446],[-9.4913231,8.2752256],[-9.4915541,8.2752166],[-9.4923461,8.2750316],[-9.4940281,8.2750806],[-9.4944481,8.2751926],[-9.4947271,8.2753636],[-9.4950051,8.2757236],[-9.4955821,8.2762756],[-9.4960211,8.2765366],[-9.4967401,8.2768696],[-9.4971901,8.2770316],[-9.4977201,8.2771036],[-9.4999801,8.2775646],[-9.5006811,8.2775286],[-9.5011301,8.2778596],[-9.5016971,8.2784416],[-9.5020891,8.2798886],[-9.5023851,8.2805576],[-9.5025801,8.2814156],[-9.5023811,8.2827106],[-9.5024371,8.2833986],[-9.5023241,8.2839456],[-9.5019681,8.2848006],[-9.5014311,8.2857346],[-9.5012191,8.2860126],[-9.5011781,8.2861916],[-9.5011871,8.2864416],[-9.5013161,8.2866516],[-9.5018341,8.2869926],[-9.5020231,8.2872226],[-9.5021511,8.2875026],[-9.5021891,8.2878816],[-9.5021571,8.2882106],[-9.5020451,8.2884486],[-9.5017021,8.2888556],[-9.5013601,8.2891126],[-9.5008181,8.2894186],[-9.5004431,8.2900146],[-9.5001111,8.2903916],[-9.4994071,8.2908866],[-9.4976191,8.2933586],[-9.4972751,8.2939146],[-9.4964221,8.2957436],[-9.4962491,8.2961616],[-9.4960341,8.2969676],[-9.4956291,8.2976126],[-9.4954971,8.2979116],[-9.4954451,8.2982996],[-9.4956191,8.2992576],[-9.4956741,8.3033036],[-9.4955881,8.3042996],[-9.4957151,8.3046896],[-9.4960241,8.3049896],[-9.4967031,8.3052426],[-9.4976961,8.3049896],[-9.4984951,8.3053526],[-9.4992961,8.3054166],[-9.4999481,8.3053106],[-9.5013691,8.3053476],[-9.5022001,8.3054816],[-9.5030131,8.3058656],[-9.5032901,8.3060856],[-9.5036321,8.3062306],[-9.5070281,8.3062266],[-9.5073601,8.3062836],[-9.5083521,8.3067296],[-9.5101871,8.3069376],[-9.5104521,8.3070486],[-9.5109471,8.3074586],[-9.5114961,8.3081886],[-9.5117261,8.3085636],[-9.5121441,8.3089956],[-9.5127841,8.3091646],[-9.5144051,8.3100866],[-9.5147108,8.3103107],[-9.5147681,8.3103526],[-9.5151851,8.3108506],[-9.5153041,8.3112696],[-9.5156201,8.3120306],[-9.5158731,8.3123736],[-9.5161701,8.3126386],[-9.5164011,8.3127946],[-9.5177031,8.3133736],[-9.5182201,8.3137286],[-9.5184501,8.3141376],[-9.5185211,8.3151726],[-9.5189671,8.3164846],[-9.5191323,8.3168527],[-9.5187821,8.3183436],[-9.5185266,8.3188689],[-9.5175853,8.3198673],[-9.5160921,8.3211353],[-9.5154023,8.3215759],[-9.5146492,8.3217217],[-9.513278,8.321836],[-9.5121174,8.3218685],[-9.510023,8.3225928],[-9.5099858,8.3232517],[-9.5104128,8.3260108],[-9.5103107,8.3263458],[-9.5099347,8.3268776],[-9.508712,8.3279646],[-9.5085112,8.3283149],[-9.5079309,8.3289939],[-9.5069778,8.3296435],[-9.5059891,8.3297559],[-9.5044306,8.3303662],[-9.5036057,8.3311282],[-9.5029211,8.3314472],[-9.500361,8.3330025],[-9.4975658,8.3360814],[-9.496776,8.337113],[-9.4956869,8.3380732],[-9.4948641,8.3387353],[-9.4929586,8.3390432],[-9.4909691,8.3389414],[-9.4897093,8.3391786],[-9.4876658,8.3434634],[-9.4866497,8.3443872],[-9.4858641,8.3445644],[-9.4850619,8.344456],[-9.4812008,8.3420314],[-9.4809571,8.3408165],[-9.4807384,8.3403612],[-9.4808599,8.3397221],[-9.4806404,8.3395492],[-9.4803187,8.3395869],[-9.4798867,8.3400037],[-9.4795778,8.3404729],[-9.4792144,8.3417608],[-9.4785559,8.3442004],[-9.4784143,8.3457809],[-9.4775691,8.3485582],[-9.4777998,8.3493401],[-9.4785964,8.3511725],[-9.4789576,8.3513057],[-9.4792106,8.3517654],[-9.4793086,8.3528327],[-9.4795573,8.3538889],[-9.4801366,8.3545528],[-9.480501,8.3548143],[-9.480692,8.3555599],[-9.4810843,8.3555956],[-9.4815437,8.3552732],[-9.4819721,8.3551207],[-9.4822354,8.3551258],[-9.4824819,8.3552082],[-9.4828179,8.3555613],[-9.4827923,8.3560958],[-9.4830442,8.3563486],[-9.4837158,8.3570889],[-9.4865773,8.3598658],[-9.4871723,8.3600395],[-9.4874679,8.3602883],[-9.4876077,8.3606046],[-9.4877775,8.360988],[-9.4878986,8.3612344],[-9.4879241,8.3618519],[-9.4877374,8.3622657],[-9.4875993,8.3625453],[-9.487727,8.3626644],[-9.4877032,8.3631227],[-9.4874215,8.3634067],[-9.487519,8.3637694],[-9.4878555,8.3640412],[-9.4881687,8.3641053],[-9.4884515,8.3639727],[-9.4888366,8.3638453],[-9.4890745,8.3636629],[-9.4898754,8.3630133],[-9.4907523,8.3631689],[-9.4913332,8.3632747],[-9.4914806,8.3636343],[-9.4916908,8.3645278],[-9.4916412,8.3650618],[-9.4915701,8.3654766],[-9.4916691,8.3656996],[-9.4921131,8.3658726],[-9.4945381,8.3660716],[-9.4952561,8.3660476],[-9.4958021,8.3659786],[-9.4963461,8.3660676],[-9.4966611,8.3661976],[-9.4970331,8.3665136],[-9.4971891,8.3667576],[-9.4972441,8.3670866],[-9.4972131,8.3675146],[-9.4969781,8.3683136],[-9.4960901,8.3703646],[-9.4958701,8.3710636],[-9.4957791,8.3718346],[-9.4958341,8.3723486],[-9.4960611,8.3727646],[-9.4963741,8.3730946],[-9.4968461,8.3734396],[-9.4970901,8.3735126],[-9.4975211,8.3734436],[-9.4988721,8.3730226],[-9.5002941,8.3730016],[-9.5020321,8.3728106],[-9.5035391,8.3728616],[-9.5041121,8.3730216],[-9.5054291,8.3735436],[-9.5064031,8.3738196],[-9.5073741,8.3746536],[-9.5080601,8.3751716],[-9.5093471,8.3759356],[-9.5105621,8.3768556],[-9.5109481,8.3770576],[-9.5120941,8.3774496],[-9.5126951,8.3777676],[-9.5134091,8.3783566],[-9.5135221,8.3786576],[-9.5138501,8.3790016],[-9.5145081,8.3793626],[-9.5150961,8.3794656],[-9.5155841,8.3795106],[-9.5158711,8.3793986],[-9.5176511,8.3794506],[-9.5185701,8.3793696],[-9.5189581,8.3792716],[-9.5198231,8.3787336],[-9.5207291,8.3784246],[-9.5211181,8.3781976],[-9.5216501,8.3779726],[-9.5222681,8.3778466],[-9.5229721,8.3778226],[-9.5233301,8.3779526],[-9.5248441,8.3792316],[-9.5253301,8.3795486],[-9.5258311,8.3797796],[-9.5278111,8.3799186],[-9.5283981,8.3801366],[-9.5297481,8.3800866],[-9.5308551,8.3798206],[-9.5318771,8.3792546],[-9.5328401,8.3790036],[-9.5330991,8.3790046],[-9.5345361,8.3787546],[-9.5357401,8.3789326],[-9.5359701,8.3788916],[-9.5361871,8.3787206],[-9.5364311,8.3786796],[-9.5369901,8.3787826],[-9.5373191,8.3790696],[-9.5393331,8.3805376],[-9.5397771,8.3807396],[-9.5403791,8.3808566],[-9.5412281,8.3805046],[-9.5416321,8.3802206],[-9.5423541,8.3795676],[-9.5433611,8.3791586],[-9.5445301,8.3788986],[-9.5453291,8.3789836],[-9.5459601,8.3790016],[-9.5463031,8.3792456],[-9.5471331,8.3797076],[-9.5477631,8.3799966],[-9.5501835,8.3809961],[-9.5505411,8.3810966],[-9.5513581,8.3812576],[-9.5517301,8.3813736],[-9.5521171,8.3815616],[-9.5525171,8.3818356],[-9.5528731,8.3823516],[-9.5531131,8.3829096],[-9.5535451,8.3851116],[-9.5536861,8.3856116],[-9.5544541,8.3867726],[-9.5546371,8.3872456],[-9.5546031,8.3881446],[-9.5542381,8.3891716],[-9.5542481,8.3899426],[-9.5544181,8.3903436],[-9.5547591,8.3908736],[-9.5554301,8.3914056],[-9.5559591,8.3917506],[-9.5564601,8.3920246],[-9.5573191,8.3923866],[-9.5585541,8.3922786],[-9.5590291,8.3921526],[-9.5593891,8.3919686],[-9.5600071,8.3917436],[-9.5607251,8.3917476],[-9.5608641,8.3925056],[-9.5621431,8.3970106],[-9.5679371,8.4077526],[-9.5676751,8.4087206],[-9.5677481,8.4094176],[-9.5697961,8.4112396],[-9.5775851,8.4174086],[-9.5783691,8.4178126],[-9.5791721,8.4178426],[-9.5800701,8.4177196],[-9.5828581,8.4172156],[-9.5833951,8.4174646],[-9.5839821,8.4179606],[-9.5846811,8.4182956],[-9.5849451,8.4183656],[-9.5852751,8.4189786],[-9.5856221,8.4194226],[-9.5859541,8.4196966],[-9.5865161,8.4200396],[-9.5869921,8.4204076],[-9.5879971,8.4209316],[-9.5883791,8.4213156],[-9.5887071,8.4222776],[-9.5888681,8.4225336],[-9.5892421,8.4227996],[-9.5895651,8.4230986],[-9.5898261,8.4237626],[-9.5901301,8.4243346],[-9.5904521,8.4247776],[-9.5906821,8.4248636],[-9.5909121,8.4249246],[-9.5913911,8.4249016],[-9.5920671,8.4248036],[-9.5931811,8.4242986],[-9.5933441,8.4241046],[-9.5935001,8.4237986],[-9.5935821,8.4228986],[-9.5935411,8.4225576],[-9.5927781,8.4216106],[-9.5926941,8.4213036],[-9.5928441,8.4205056],[-9.5930271,8.4199626],[-9.5929651,8.4175056],[-9.5928741,8.4170036],[-9.5927061,8.4165526],[-9.5924941,8.4161516],[-9.5923941,8.4158196],[-9.5923881,8.4153686],[-9.5924671,8.4150036],[-9.5929751,8.4143006],[-9.5931141,8.4140376],[-9.5932781,8.4123476],[-9.5938211,8.4115086],[-9.5941381,8.4113826],[-9.5955331,8.4110156],[-9.5961321,8.4107556],[-9.5969571,8.4100536],[-9.5973761,8.4099366],[-9.5986831,8.4099266],[-9.5990781,8.4096906],[-9.5998021,8.4085806],[-9.6000011,8.4082076],[-9.6002071,8.4079966],[-9.6005411,8.4078956],[-9.6015591,8.4077656],[-9.6028231,8.4077546],[-9.6033461,8.4075446],[-9.6037741,8.4074276],[-9.6043821,8.4071426],[-9.6057771,8.4066646],[-9.6063421,8.4065146],[-9.6065831,8.4063376],[-9.6068831,8.4060326],[-9.6077611,8.4049326],[-9.6081401,8.4045516],[-9.6085351,8.4042396],[-9.6088081,8.4041466],[-9.6092871,8.4041576],[-9.6106701,8.4044116],[-9.6126171,8.4044636],[-9.6131631,8.4046286],[-9.6135981,8.4046986],[-9.6138881,8.4048106],[-9.6142801,8.4051096],[-9.6154341,8.4062976],[-9.6158771,8.4066566],[-9.6161751,8.4066926],[-9.6166281,8.4067286],[-9.6172521,8.4066556],[-9.6175611,8.4065376],[-9.6184111,8.4058286],[-9.6190441,8.4056866],[-9.6198641,8.4057596],[-9.6210241,8.4060626],[-9.6216201,8.4062866],[-9.6235941,8.4062546],[-9.6245951,8.4061486],[-9.6254341,8.4057706],[-9.6262391,8.4055536],[-9.6269311,8.4055656],[-9.6276561,8.4056966],[-9.6285261,8.4059566],[-9.6287901,8.4061106],[-9.6297381,8.4062256],[-9.6301981,8.4063896],[-9.6307021,8.4064346],[-9.6311211,8.4063436],[-9.6318171,8.4057516],[-9.6326251,8.4049316],[-9.6330621,8.4047126],[-9.6344711,8.4048046],[-9.6354301,8.4045206],[-9.6372751,8.4044956],[-9.6377541,8.4044136],[-9.6383401,8.4036086],[-9.6386491,8.4032696],[-9.6389411,8.4030246],[-9.6394891,8.4028066],[-9.6399951,8.4024866],[-9.6406211,8.4021916],[-9.6413821,8.4020516],[-9.6421441,8.4017576],[-9.6431291,8.4014476],[-9.6454121,8.4010256],[-9.6458831,8.4008586],[-9.6464421,8.4002486],[-9.6467531,8.3996636],[-9.6470021,8.3994276],[-9.6472181,8.3991306],[-9.6473741,8.3987316],[-9.6474791,8.3982736],[-9.6476511,8.3980536],[-9.6479601,8.3977746],[-9.6482021,8.3973586],[-9.6481431,8.3987356],[-9.6482421,8.3992296],[-9.6487651,8.4004056],[-9.6490961,8.4008746],[-9.6500721,8.4020186],[-9.6502231,8.4024696],[-9.6504421,8.4028786],[-9.6507561,8.4032886],[-9.6512661,8.4036986],[-9.6524421,8.4042996],[-9.6532111,8.4043296],[-9.6539971,8.4042996],[-9.6544421,8.4041566],[-9.6553481,8.4041956],[-9.6576501,8.4049126],[-9.6582211,8.4052126],[-9.6584841,8.4054526],[-9.6588401,8.4060826],[-9.6589131,8.4066696],[-9.6591621,8.4078956],[-9.6588691,8.4083696],[-9.6586511,8.4091596],[-9.6583401,8.4097356],[-9.6582771,8.4101946],[-9.6583601,8.4106376],[-9.6582981,8.4111296],[-9.6580131,8.4116126],[-9.6577031,8.4119596],[-9.6566571,8.4126776],[-9.6553281,8.4134356],[-9.6549931,8.4137656],[-9.6547581,8.4144106],[-9.6544951,8.4156336],[-9.6547541,8.4166976],[-9.6547281,8.4182446],[-9.6548531,8.4187806],[-9.6548671,8.4192476],[-9.6545401,8.4196456],[-9.6543091,8.4197556],[-9.6539061,8.4198556],[-9.6534101,8.4199206],[-9.6532041,8.4201066],[-9.6528931,8.4206746],[-9.6526931,8.4214046],[-9.6523371,8.4223636],[-9.6520361,8.4226516],[-9.6513991,8.4234046],[-9.6512011,8.4238026],[-9.6511731,8.4240576],[-9.6512891,8.4247636],[-9.6511481,8.4254266],[-9.6504751,8.4265626],[-9.6500451,8.4271206],[-9.6497281,8.4272976],[-9.6491461,8.4273716],[-9.6479441,8.4269826],[-9.6463241,8.4263116],[-9.6454451,8.4260946],[-9.6450611,8.4261016],[-9.6448211,8.4262196],[-9.6444771,8.4265406],[-9.6443051,8.4268116],[-9.6440101,8.4274816],[-9.6438121,8.4278206],[-9.6433571,8.4282016],[-9.6430551,8.4286166],[-9.6425881,8.4295236],[-9.6417391,8.4301826],[-9.6412671,8.4304606],[-9.6409661,8.4307476],[-9.6403931,8.4309486],[-9.6394161,8.4314626],[-9.6384561,8.4318406],[-9.6378561,8.4322456],[-9.6371271,8.4326076],[-9.6352041,8.4342976],[-9.6343971,8.4348976],[-9.6337021,8.4353186],[-9.6328521,8.4359856],[-9.6306351,8.4381596],[-9.6302911,8.4385316],[-9.6294041,8.4397596],[-9.6289831,8.4400806],[-9.6287001,8.4403686],[-9.6285601,8.4408526],[-9.6285111,8.4418466],[-9.6285691,8.4423056],[-9.6288711,8.4431576],[-9.6285871,8.4435726],[-9.6280511,8.4445896],[-9.6273521,8.4456656],[-9.6271771,8.4464726],[-9.6270471,8.4467616],[-9.6266241,8.4474476],[-9.6262801,8.4478286],[-9.6258141,8.4485826],[-9.6255731,8.4488446],[-9.6246041,8.4495026],[-9.6235111,8.4507556],[-9.6228581,8.4513816],[-9.6221651,8.4515396],[-9.6214391,8.4514506],[-9.6211231,8.4514576],[-9.6209511,8.4516266],[-9.6205971,8.4523646],[-9.6202531,8.4527456],[-9.6200811,8.4528296],[-9.6199911,8.4535596],[-9.6200211,8.4542486],[-9.6202581,8.4546836],[-9.6203591,8.4550326],[-9.6203541,8.4558736],[-9.6204121,8.4561976],[-9.6205301,8.4564186],[-9.6209381,8.4567616],[-9.6217841,8.4568416],[-9.6219711,8.4569876],[-9.6220291,8.4572086],[-9.6220271,8.4575576],[-9.6219391,8.4579396],[-9.6217051,8.4585416],[-9.6218641,8.4591546],[-9.6225461,8.4608416],[-9.6230721,8.4615916],[-9.6256711,8.4641806],[-9.6263191,8.4644906],[-9.6282391,8.4648826],[-9.6291821,8.4659416],[-9.6297411,8.4667096],[-9.6298591,8.4670076],[-9.6302911,8.4676126],[-9.6303561,8.4682846],[-9.6302171,8.4685226],[-9.6302051,8.4692616],[-9.6301501,8.4697716],[-9.6300271,8.4703576],[-9.6294461,8.4719186],[-9.6294501,8.4725816],[-9.6296531,8.4729316],[-9.6298911,8.4732126],[-9.6310351,8.4733636],[-9.6316921,8.4735286],[-9.6328281,8.4736866],[-9.6338021,8.4735986],[-9.6342891,8.4736606],[-9.6355271,8.4739556],[-9.636158,8.4741886],[-9.637163,8.4746356],[-9.637735,8.4747316],[-9.638599,8.4745576],[-9.639085,8.4748316],[-9.639657,8.4749026],[-9.639947,8.4750236],[-9.640229,8.4750416],[-9.64052,8.4749756],[-9.641223,8.4745796],[-9.641727,8.4745736],[-9.642351,8.4744656],[-9.64383,8.4743796],[-9.644224,8.4742376],[-9.6445931,8.4740016],[-9.6451401,8.4739356],[-9.6455521,8.4737766],[-9.6459451,8.4737696],[-9.6462341,8.4739326],[-9.6464651,8.4739596],[-9.646626,8.4741046],[-9.646831,8.4741826],[-9.647045,8.4741406],[-9.6471981,8.4743376],[-9.647617,8.4742626],[-9.647898,8.4743496],[-9.648495,8.4746496],[-9.649068,8.4745246],[-9.649437,8.4742206],[-9.6499691,8.4739006],[-9.6509191,8.4736586],[-9.6513381,8.4736356],[-9.6520381,8.4737746],[-9.6527911,8.4735996],[-9.6529871,8.4736516],[-9.653395,8.4740456],[-9.653642,8.4741396],[-9.654146,8.4741506],[-9.6544721,8.4739736],[-9.654461,8.4744156],[-9.654289,8.4746366],[-9.653868,8.4750246],[-9.653695,8.4752966],[-9.653659,8.4756866],[-9.653412,8.4770116],[-9.653383,8.4774966],[-9.653287,8.4779126],[-9.653132,8.4781416],[-9.652908,8.4783606],[-9.652591,8.4785886],[-9.652194,8.4791476],[-9.651944,8.4796656],[-9.651813,8.4801406],[-9.651622,8.4805566],[-9.651526,8.4809556],[-9.651179,8.4818296],[-9.651117,8.4821776],[-9.651005,8.4823296],[-9.650602,8.4826166],[-9.65018,8.4831336],[-9.649758,8.4837346],[-9.649464,8.4843366],[-9.6493591,8.4846596],[-9.649297,8.4851266],[-9.649302,8.4857556],[-9.649222,8.4861976],[-9.648972,8.4866636],[-9.648832,8.4871816],[-9.647545,8.4895726],[-9.647397,8.4900396],[-9.6469122,8.4908686],[-9.6470722,8.4911926],[-9.6476412,8.4917306],[-9.6480082,8.4919196],[-9.6488452,8.4919666],[-9.6494662,8.4924366],[-9.6499182,8.4926516],[-9.6501662,8.4926786],[-9.6509702,8.4924276],[-9.6517682,8.4919636],[-9.6521612,8.4918726],[-9.6525802,8.4918486],[-9.6532392,8.4916566],[-9.6550682,8.4916576],[-9.6555882,8.4919996],[-9.6558762,8.4922906],[-9.6564982,8.4927186],[-9.6568122,8.4930856],[-9.6569732,8.4933836],[-9.6571742,8.4939966],[-9.6577222,8.4953426],[-9.6582322,8.4958126],[-9.6585302,8.4959416],[-9.6594112,8.4957846],[-9.6602582,8.4957466],[-9.6606152,8.4960376],[-9.6608862,8.4963866],[-9.6616432,8.4969856],[-9.6621972,8.4972606],[-9.6623842,8.4974906],[-9.6624942,8.4977126],[-9.6625522,8.4979766],[-9.6630132,8.5011066],[-9.6632652,8.5017206],[-9.6636242,8.5017216],[-9.6644532,8.5018286],[-9.6658722,8.5017676],[-9.6664192,8.5016506],[-9.6671302,8.5013486],[-9.6675962,8.5006026],[-9.6681092,8.4990666],[-9.6683402,8.4990086],[-9.6771592,8.4947416],[-9.6787192,8.4939166],[-9.6812212,8.4927046],[-9.6819262,8.4919766],[-9.6853862,8.4892826],[-9.6869042,8.4882446],[-9.6892272,8.4870826],[-9.6932362,8.4852746],[-9.6947012,8.4847546],[-9.6953932,8.4847406],[-9.6961362,8.4848716],[-9.6968452,8.4848246],[-9.6972132,8.4847156],[-9.6977372,8.4843356],[-9.6979002,8.4841586],[-9.6979532,8.4838866],[-9.6979502,8.4828916],[-9.6982272,8.4822636],[-9.6987882,8.4813996],[-9.6990212,8.4809506],[-9.6991692,8.4804916],[-9.6991702,8.4802286],[-9.6990442,8.4799306],[-9.6990202,8.4795396],[-9.6992332,8.4781546],[-9.6993272,8.4766926],[-9.6995532,8.4760396],[-9.6993852,8.4740236],[-9.7006613,8.4720326],[-9.7007323,8.4716246],[-9.7007423,8.4713106],[-9.7006083,8.4707746],[-9.7004743,8.4704416],[-9.6999993,8.4697596],[-9.6999243,8.4694706],[-9.6998863,8.4686456],[-9.7001203,8.4679926],[-9.7010583,8.4668916],[-9.7013253,8.4664166],[-9.7015073,8.4660186],[-9.7016143,8.4652536],[-9.7016273,8.4644716],[-9.7014263,8.4637486],[-9.7014353,8.4621666],[-9.7013183,8.4617586],[-9.7012083,8.4615626],[-9.7009443,8.4613236],[-9.7003053,8.4609626],[-9.6994943,8.4593606],[-9.6989673,8.4589756],[-9.6987713,8.4587196],[-9.6984523,8.4578766],[-9.6983623,8.4571626],[-9.6984153,8.4568306],[-9.6986053,8.4564236],[-9.6988883,8.4561786],[-9.6992593,8.4557216],[-9.6995407,8.4552111],[-9.6999278,8.4553709],[-9.70036,8.4552816],[-9.7005459,8.4543933],[-9.7008585,8.4543627],[-9.7011971,8.45408],[-9.70131,8.4536518],[-9.7020723,8.4540148],[-9.7022041,8.4538426],[-9.7024676,8.4539357],[-9.7027311,8.4531863],[-9.7023942,8.4528618],[-9.7024115,8.451947],[-9.7025664,8.4519063],[-9.7027438,8.4519995],[-9.70299,8.4514176],[-9.7035586,8.4515852],[-9.7036403,8.4510913],[-9.7039812,8.4509807],[-9.7043358,8.4508776],[-9.7047118,8.450333],[-9.7050416,8.4503191],[-9.7050652,8.4507706],[-9.7052816,8.4508962],[-9.7053946,8.4506868],[-9.7055263,8.4505704],[-9.7056863,8.4506076],[-9.7057381,8.4507659],[-9.7058416,8.4510173],[-9.7059263,8.4508823],[-9.7060957,8.4507706],[-9.7063545,8.4508311],[-9.7065587,8.4506836],[-9.7063075,8.4502446],[-9.7061851,8.4501515],[-9.7061946,8.4499979],[-9.7063404,8.449942],[-9.7065663,8.4500212],[-9.7067075,8.4497465],[-9.7068251,8.4495836],[-9.7070709,8.4494964],[-9.7071263,8.4491973],[-9.7068769,8.4491275],[-9.7068204,8.4489227],[-9.7069139,8.4487825],[-9.7071013,8.448536],[-9.7073992,8.4484712],[-9.7074463,8.4486434],[-9.7075169,8.4487365],[-9.7076251,8.4486248],[-9.7076392,8.4485037],[-9.7075357,8.4484107],[-9.7076157,8.448285],[-9.7078274,8.44842],[-9.7080768,8.4484293],[-9.7082269,8.4482868],[-9.7082227,8.4480243],[-9.7083404,8.4478195],[-9.7085709,8.4474239],[-9.7087636,8.4469605],[-9.7089693,8.4460186],[-9.7091933,8.4457556],[-9.7093833,8.4453576],[-9.7097783,8.4449856],[-9.7091827,8.4449662],[-9.7090792,8.4444914],[-9.7090698,8.4440911],[-9.7094791,8.4440771],[-9.70987,8.4441332],[-9.7105533,8.4440116],[-9.7109673,8.4432668],[-9.7109431,8.4425964],[-9.7107612,8.4423986],[-9.7104674,8.4424247],[-9.7099544,8.4426574],[-9.7097333,8.4423735],[-9.7098274,8.4420104],[-9.7102038,8.4415915],[-9.7107356,8.4413588],[-9.7110631,8.4416449],[-9.7116863,8.4416796],[-9.7118841,8.4412313],[-9.7117816,8.4406287],[-9.711954,8.4405565],[-9.7119939,8.4396975],[-9.7123366,8.4392828],[-9.7130553,8.4391915],[-9.7134443,8.4390266],[-9.7141783,8.4390816],[-9.7148713,8.4389996],[-9.7154613,8.4388756],[-9.7162733,8.4387946],[-9.7167863,8.4388566],[-9.7172123,8.4389776],[-9.7177238,8.4392776],[-9.7179483,8.4402476],[-9.7178433,8.4406806],[-9.7177573,8.4408586],[-9.7177463,8.4412406],[-9.7172993,8.4433636],[-9.7172643,8.4449616],[-9.7174833,8.4454136],[-9.7175243,8.4457536],[-9.7174973,8.4460936],[-9.7169523,8.4471876],[-9.7166923,8.4478576],[-9.7166393,8.4482066],[-9.7166713,8.4485636],[-9.7169313,8.4494066],[-9.7171463,8.4506566],[-9.7170673,8.4509966],[-9.7169043,8.4512506],[-9.7163883,8.4517926],[-9.7162553,8.4525736],[-9.7160663,8.4528536],[-9.7155173,8.4531396],[-9.7153023,8.4533516],[-9.7152843,8.4536406],[-9.7153683,8.4552646],[-9.7153233,8.4557486],[-9.7154233,8.4562246],[-9.7164123,8.4580996],[-9.7166133,8.4587556],[-9.7168503,8.4591986],[-9.7170463,8.4593016],[-9.7173863,8.4597196],[-9.7176243,8.4597886],[-9.7181093,8.4602336],[-9.7182603,8.4606506],[-9.7187793,8.4610946],[-9.7188203,8.4614526],[-9.7192253,8.4623046],[-9.7195223,8.4627136],[-9.7203903,8.4633126],[-9.7206613,8.4637906],[-9.7211383,8.4641076],[-9.7213403,8.4645416],[-9.7217483,8.4649096],[-9.7218493,8.4652586],[-9.7220353,8.4655826],[-9.7223853,8.4657536],[-9.7229153,8.4657226],[-9.7232403,8.4656046],[-9.7246673,8.4640816],[-9.7253103,8.4636936],[-9.7262513,8.4635796],[-9.7266413,8.4640406],[-9.7267933,8.4643976],[-9.7268673,8.4649336],[-9.7268813,8.4655456],[-9.7270323,8.4659376],[-9.7272873,8.4662876],[-9.7282223,8.4670656],[-9.7292203,8.4674276],[-9.7303023,8.4680106],[-9.7306163,8.4683096],[-9.7311089,8.4692586],[-9.7312003,8.4694346],[-9.7315313,8.4698696],[-9.7317773,8.4701176],[-9.7321093,8.4702886],[-9.7325523,8.4706396],[-9.7333013,8.4710256],[-9.7337443,8.4714186],[-9.7341423,8.4720666],[-9.7343503,8.4729436],[-9.7345123,8.4731566],[-9.7344132,8.4740486],[-9.7347312,8.4767616],[-9.7347982,8.4769746],[-9.7354162,8.4779296],[-9.7355852,8.4782876],[-9.7357032,8.4786366],[-9.7359032,8.4795726],[-9.7364352,8.4807396],[-9.7367972,8.4817016],[-9.7368702,8.4822716],[-9.7368592,8.4828416],[-9.7367172,8.4836736],[-9.7366532,8.4844806],[-9.7366772,8.4847446],[-9.7368122,8.4850516],[-9.7369902,8.4852986],[-9.7376622,8.4857866],[-9.7380952,8.4864266],[-9.7382382,8.4868346],[-9.7382822,8.4881356],[-9.7386122,8.4886386],[-9.7386422,8.4894806],[-9.7389642,8.4899156],[-9.7392702,8.4902226],[-9.7394992,8.4905646],[-9.7398872,8.4914246],[-9.7404512,8.4929406],[-9.7406072,8.4940376],[-9.7407512,8.4944126],[-9.7412252,8.4951796],[-9.7413942,8.4955716],[-9.7415022,8.4960476],[-9.7415502,8.4966346],[-9.7414432,8.4974416],[-9.7414212,8.4982666],[-9.7416892,8.4993556],[-9.7423392,8.5007526],[-9.7427452,8.5015026],[-9.7431862,8.5021936],[-9.7435832,8.5029346],[-9.7438452,8.5035486],[-9.7438512,8.5038716],[-9.7436702,8.5041336],[-9.7435582,8.5043966],[-9.7435712,8.5050346],[-9.7438582,8.5057326],[-9.7439162,8.5060306],[-9.7438882,8.5065146],[-9.7437922,8.5069146],[-9.7435402,8.5075416],[-9.7433422,8.5079066],[-9.7432802,8.5083056],[-9.7432652,8.5093346],[-9.7435802,8.5095906],[-9.7428622,8.5096466],[-9.7426132,8.5097566],[-9.7420022,8.5105356],[-9.7408792,8.5111506],[-9.7402612,8.5116326],[-9.7399022,8.5118006],[-9.7395252,8.5118926],[-9.7380382,8.5118936],[-9.7368082,8.5118196],[-9.7362002,8.5119446],[-9.7354292,8.5122386],[-9.7346322,8.5127186],[-9.7343242,8.5128446],[-9.7324762,8.5131256],[-9.7321792,8.5127926],[-9.7319502,8.5123916],[-9.7313812,8.5117766],[-9.7307672,8.5115186],[-9.7303912,8.5115596],[-9.7301772,8.5116946],[-9.7294292,8.5124046],[-9.7291892,8.5125826],[-9.7283842,8.5129096],[-9.7277752,8.5132726],[-9.7273372,8.5135936],[-9.7268382,8.5141266],[-9.7262382,8.5145656],[-9.7260042,8.5151086],[-9.7258992,8.5154656],[-9.7258072,8.5167056],[-9.7256682,8.5170966],[-9.7256402,8.5174446],[-9.7253612,8.5184206],[-9.7250742,8.5209616],[-9.7250532,8.5230776],[-9.7248872,8.5252536],[-9.7249202,8.5255506],[-9.7250892,8.5258576],[-9.7258202,8.5265756],[-9.7262792,8.5269346],[-9.7264322,8.5272446],[-9.7268422,8.5278726],[-9.7276222,8.5283336],[-9.7281712,8.5289926],[-9.7283372,8.5295126],[-9.7288402,8.5300496],[-9.7310862,8.5317536],[-9.7364592,8.5340686],[-9.7398602,8.5351076],[-9.7422962,8.5357756],[-9.7428772,8.5362516],[-9.7461112,8.5395936],[-9.7471632,8.5407736],[-9.7482292,8.5423056],[-9.7497352,8.5446476],[-9.7502042,8.5445996],[-9.7511082,8.5447556],[-9.7515942,8.5447796],[-9.7520132,8.5448906],[-9.7525202,8.5451336],[-9.7530482,8.5457946],[-9.7533792,8.5461036],[-9.7538862,8.5465016],[-9.7543932,8.5467006],[-9.7546352,8.5468766],[-9.7547892,8.5471636],[-9.7550542,8.5473396],[-9.7554292,8.5473416],[-9.7563562,8.5471676],[-9.7566872,8.5472566],[-9.7572308,8.5475133],[-9.7575439,8.5475942],[-9.7577372,8.5476637],[-9.7580015,8.5477379],[-9.7582762,8.5478259],[-9.7585407,8.5478804],[-9.7588463,8.5480962],[-9.7593964,8.5483444],[-9.7597243,8.5485733],[-9.7599848,8.5487737],[-9.7605251,8.5489645],[-9.7609158,8.5488747],[-9.7613879,8.5489808],[-9.7618009,8.5490338],[-9.7622408,8.5492779],[-9.7625092,8.5496696],[-9.7628182,8.5497586],[-9.7634362,8.5497386],[-9.7637452,8.5497836],[-9.7642082,8.5501146],[-9.7645392,8.5502476],[-9.7647372,8.5502036],[-9.7645973,8.5504358],[-9.7647491,8.5505481],[-9.765193,8.5506859],[-9.7655389,8.5508441],[-9.7654408,8.5509513],[-9.7656266,8.5511759],[-9.7658486,8.5509411],[-9.7660975,8.551072],[-9.7663633,8.5509785],[-9.7665358,8.5509262],[-9.7665362,8.551203],[-9.7668452,8.5512514],[-9.7667936,8.5514351],[-9.7673872,8.551476],[-9.7674646,8.5516444],[-9.7681821,8.551721],[-9.768582,8.551925],[-9.7690602,8.5518656],[-9.7695232,8.5519106],[-9.7703856,8.5515047],[-9.7706584,8.5512755],[-9.7711018,8.5512984],[-9.7722632,8.5513149],[-9.7739728,8.5506303],[-9.7749463,8.550312],[-9.7756153,8.549988],[-9.7764382,8.5487852],[-9.7773958,8.5476336],[-9.7781082,8.5465585],[-9.7788954,8.5443495],[-9.7798394,8.542139],[-9.7814217,8.5408858],[-9.7822413,8.5403606],[-9.7827125,8.5398054],[-9.7833625,8.5381694],[-9.7835588,8.5374551],[-9.7838437,8.5367004],[-9.7849007,8.5354502],[-9.7855289,8.53437],[-9.7861252,8.5332058],[-9.7865657,8.5329132],[-9.7869384,8.5327872],[-9.7871005,8.5328974],[-9.787445,8.5331927],[-9.7876722,8.533384],[-9.7896181,8.5343178],[-9.7916586,8.5350197],[-9.7930271,8.5354287],[-9.7942107,8.5356294],[-9.7950762,8.5357859],[-9.7955032,8.5353989],[-9.7956777,8.5350557],[-9.7955002,8.5344649],[-9.7957049,8.533739],[-9.7968041,8.5329248],[-9.7972127,8.532644],[-9.7977379,8.5320634],[-9.7979697,8.5314459],[-9.7985785,8.5294632],[-9.7993656,8.5287555],[-9.80043,8.5271434],[-9.8009392,8.5264079],[-9.8012182,8.5254083],[-9.8011354,8.5247194],[-9.8008074,8.5243649],[-9.8004623,8.5246042],[-9.800084,8.5251509],[-9.7999201,8.5258137],[-9.7996414,8.526254],[-9.7987889,8.5259864],[-9.7976124,8.5260328],[-9.7967065,8.5258012],[-9.7965036,8.5256953],[-9.7963867,8.5251328],[-9.7965225,8.5240727],[-9.7963521,8.5230118],[-9.7963967,8.5218309],[-9.7966633,8.5214654],[-9.7968531,8.5199937],[-9.7966824,8.5191521],[-9.7964833,8.5188484],[-9.7955101,8.5186583],[-9.7949718,8.5183274],[-9.7944812,8.5178636],[-9.7932115,8.5170221],[-9.7923965,8.5167038],[-9.7915535,8.5167331],[-9.7905315,8.5164868],[-9.7900415,8.5162838],[-9.7897699,8.5160694],[-9.7895608,8.5156462],[-9.7900047,8.5146697],[-9.7903367,8.513837],[-9.7906252,8.5127791],[-9.7909991,8.5111048],[-9.7904508,8.5087359],[-9.7904517,8.508156],[-9.7907157,8.5076917],[-9.7913637,8.5073494],[-9.7920588,8.5070529],[-9.7955106,8.5066995],[-9.7985448,8.5052563],[-9.7994523,8.5043879],[-9.799951,8.5041926],[-9.8022496,8.5038865],[-9.8031243,8.5034476],[-9.8040205,8.5026705],[-9.805105,8.5017853],[-9.8059871,8.5013873],[-9.8068925,8.5015345],[-9.8078292,8.5020191],[-9.8120872,8.5027478],[-9.8129503,8.5027134],[-9.8147219,8.5025417],[-9.8157771,8.5025813],[-9.8186132,8.5029929],[-9.8193439,8.5028249],[-9.8199432,8.5026356],[-9.8211838,8.5017569],[-9.8217009,8.5014195],[-9.8227182,8.5010257],[-9.8234406,8.5009947],[-9.824074,8.5012847],[-9.8257474,8.5021064],[-9.8264713,8.5020792],[-9.828052,8.5025369],[-9.8316357,8.5015444],[-9.8324819,8.5006896],[-9.8324834,8.5002933],[-9.8323799,8.5001002],[-9.8321007,8.499702],[-9.8317922,8.4991284],[-9.8315511,8.4986664],[-9.831409,8.498295],[-9.8312894,8.4977092],[-9.8312431,8.4974088],[-9.831084,8.4971114],[-9.8309385,8.4966331],[-9.8308606,8.4961359],[-9.8305882,8.4955841],[-9.8304923,8.4951529],[-9.8305695,8.4949239],[-9.8309864,8.4945645],[-9.8314544,8.494453],[-9.8320102,8.494114],[-9.8330376,8.493776],[-9.8338407,8.4937905],[-9.8343505,8.493689],[-9.8350848,8.4937191],[-9.8355323,8.4937848],[-9.8356391,8.4937979],[-9.8371794,8.4939855],[-9.8374082,8.4937333],[-9.837661,8.4930639],[-9.8377901,8.4923712],[-9.8379006,8.4916698],[-9.8381329,8.4899607],[-9.8382463,8.4892782],[-9.8384469,8.4887445],[-9.8387544,8.4883021],[-9.8393053,8.4873665],[-9.8396769,8.486554],[-9.840016,8.4857292],[-9.8403804,8.4851009],[-9.8409356,8.4846905],[-9.8416727,8.4840805],[-9.8423562,8.4837675],[-9.8433995,8.4833949],[-9.8441676,8.4831366],[-9.8447051,8.483165],[-9.8451934,8.4832692],[-9.8456024,8.4833851],[-9.8458219,8.4835298],[-9.8459516,8.4838265],[-9.8458304,8.4841652],[-9.8450343,8.4844751],[-9.8440319,8.4849529],[-9.8435092,8.4851857],[-9.8432399,8.4854156],[-9.8429851,8.4857563],[-9.8428591,8.4862805],[-9.8428683,8.4868284],[-9.8429569,8.4874091],[-9.8435983,8.4887253],[-9.8438789,8.4891157],[-9.8444553,8.4893963],[-9.8451474,8.4893607],[-9.846137,8.4896245],[-9.8464614,8.489781],[-9.846775,8.4899551],[-9.8469333,8.4902252],[-9.8468562,8.4906395],[-9.8466883,8.491167],[-9.846862,8.4922912],[-9.8470257,8.4929549],[-9.8474123,8.4936294],[-9.8481345,8.4948191],[-9.8485862,8.495243],[-9.8489065,8.4956764],[-9.8493477,8.4961847],[-9.8517349,8.4980564],[-9.852558,8.4989738],[-9.8531987,8.4997659],[-9.8536091,8.5002659],[-9.8539295,8.500553],[-9.854315,8.5008303],[-9.8546903,8.5007461],[-9.8551747,8.5005834],[-9.8555913,8.5003698],[-9.856217,8.5002609],[-9.8570979,8.5001124],[-9.858109,8.5001025],[-9.8589449,8.5002065],[-9.8595856,8.5003401],[-9.860887,8.5004441],[-9.8611373,8.5001173],[-9.8611323,8.4997461],[-9.8613125,8.4995134],[-9.8615177,8.4992015],[-9.861783,8.4987312],[-9.8622836,8.4982708],[-9.8630494,8.4980084],[-9.8636577,8.4979047],[-9.8647664,8.4978941],[-9.8655841,8.4977757],[-9.8661928,8.4978599],[-9.8666973,8.4981389],[-9.8671889,8.4984243],[-9.8678096,8.498751],[-9.868215,8.4988208],[-9.8687934,8.4986071],[-9.8691028,8.4984631],[-9.8695948,8.4983664],[-9.8699792,8.498357],[-9.8707054,8.4985864],[-9.8724382,8.4987413],[-9.8731353,8.4984752],[-9.8742481,8.4982803],[-9.874813,8.497984],[-9.8753785,8.497882],[-9.876118,8.4977654],[-9.879071,8.4982982],[-9.8826199,8.4982922],[-9.8831793,8.4978645],[-9.8832453,8.4973382],[-9.8833932,8.4968973],[-9.8838058,8.4961719],[-9.8841279,8.4956806],[-9.8845985,8.4954393],[-9.8848327,8.4952213],[-9.884961,8.4948402],[-9.8852956,8.4941323],[-9.8858346,8.4939077],[-9.8863278,8.4937958],[-9.8866529,8.4940226],[-9.8871236,8.4941234],[-9.8875317,8.4938994],[-9.887837,8.4938987],[-9.8882193,8.4942628],[-9.88846,8.4945498],[-9.8888635,8.4947249],[-9.8891537,8.4948719],[-9.8894247,8.4951056],[-9.8895147,8.495481],[-9.8896209,8.4959851],[-9.8896138,8.4969932],[-9.8897129,8.4980224],[-9.8901191,8.4983105],[-9.8904137,8.4980504],[-9.8906898,8.4977563],[-9.891072,8.4975953],[-9.8918011,8.4977283],[-9.8930895,8.4980154],[-9.8940805,8.4982674],[-9.894845,8.4985194],[-9.8954396,8.4989255],[-9.896105,8.4991635],[-9.897627,8.4992896],[-9.8990853,8.4992407],[-9.9004868,8.4991355],[-9.9009115,8.4992266],[-9.9014353,8.4993736],[-9.9019506,8.4997371],[-9.9024611,8.5000155],[-9.9037784,8.5001787],[-9.9046066,8.5002907],[-9.9052296,8.5003467],[-9.9058738,8.5004411],[-9.906943,8.5005963],[-9.9081706,8.5004273],[-9.9100124,8.500307],[-9.9117897,8.4998514],[-9.9135658,8.499477],[-9.9144691,8.4991841],[-9.9152219,8.4988738],[-9.9157843,8.498683],[-9.9161816,8.4982486],[-9.9164954,8.4977927],[-9.9169817,8.49715],[-9.9177298,8.4964016],[-9.918268,8.4960051],[-9.9188844,8.4957373],[-9.9200641,8.4957305],[-9.9209275,8.4959171],[-9.9218976,8.4959555],[-9.922473,8.4959797],[-9.9233757,8.4959349],[-9.9242351,8.4957473],[-9.9248386,8.4953517],[-9.9252277,8.4945917],[-9.9254758,8.4938671],[-9.9259604,8.4933163],[-9.926422,8.4929676],[-9.9268289,8.4927906],[-9.9274425,8.4926762],[-9.9280315,8.4924877],[-9.9286603,8.4921698],[-9.9292686,8.491634],[-9.9298951,8.4911478],[-9.9304059,8.4907555],[-9.9311583,8.490513],[-9.9318302,8.4907518],[-9.9325794,8.4906782],[-9.932992,8.4906822],[-9.933449,8.4904457],[-9.9342003,8.4900639],[-9.9345734,8.4896236],[-9.9349973,8.4892296],[-9.9350512,8.4890364],[-9.9350681,8.4884429],[-9.9350632,8.4880651],[-9.9348458,8.4873613],[-9.9345961,8.4860151],[-9.9348161,8.4850807],[-9.9352365,8.4847859],[-9.9356967,8.4847712],[-9.936187,8.4846036],[-9.9364394,8.484558],[-9.936589,8.4849891],[-9.9368236,8.4854144],[-9.9369406,8.4858579],[-9.9371393,8.4860731],[-9.9374247,8.4859209],[-9.9379304,8.4860357],[-9.9387848,8.4862915],[-9.9397538,8.4865521],[-9.9411195,8.4865713],[-9.9415572,8.4862032],[-9.9418383,8.4859444],[-9.9419563,8.4856144],[-9.9420308,8.4854184],[-9.9422182,8.4851523],[-9.9423103,8.4847952],[-9.9429827,8.4842981],[-9.9437826,8.483654],[-9.9444834,8.4831079],[-9.9448586,8.4828699],[-9.9455028,8.4824498],[-9.9458992,8.4820787],[-9.9464513,8.4817357],[-9.9471663,8.4812596],[-9.9478954,8.4806364],[-9.9485679,8.4801323],[-9.9489077,8.4798313],[-9.9494386,8.4795442],[-9.950012,8.4792222],[-9.9511304,8.4786621],[-9.9521214,8.4780459],[-9.9528534,8.4775359],[-9.9537527,8.4766386],[-9.9547031,8.4757244],[-9.9552624,8.4754238],[-9.9556475,8.4752754],[-9.9560555,8.4753879],[-9.9564332,8.4753799],[-9.9568458,8.475212],[-9.9572729,8.4745967],[-9.9576589,8.4742609],[-9.9581685,8.4740176],[-9.9588791,8.4734698],[-9.9597049,8.4729944],[-9.9604531,8.4725774],[-9.961305,8.4720041],[-9.9620147,8.4710363],[-9.9625692,8.4701886],[-9.9628778,8.4696067],[-9.9632081,8.4687056],[-9.9632249,8.4686258],[-9.9633182,8.4681808],[-9.9635185,8.4677352],[-9.9637187,8.4672995],[-9.9641191,8.4661509],[-9.9646897,8.4648934],[-9.9655077,8.4639816],[-9.9664016,8.4633982],[-9.9675228,8.4627447],[-9.9687707,8.4621802],[-9.9697606,8.4618979],[-9.970448,8.4620101],[-9.9713953,8.4622626],[-9.9722054,8.4628501],[-9.9731283,8.4632537],[-9.9735199,8.4630246],[-9.973632,8.4628943],[-9.9738106,8.4626446],[-9.9747722,8.46186],[-9.9753601,8.4614077],[-9.9763245,8.4606564],[-9.9768434,8.4602611],[-9.977741,8.4593957],[-9.9783385,8.4588767],[-9.9787768,8.4583905],[-9.979472,8.4576975],[-9.9798129,8.4571611],[-9.9801966,8.456824],[-9.980821,8.4564958],[-9.9813643,8.4562059],[-9.9818968,8.4561727],[-9.982981,8.4558447],[-9.983493,8.4556109],[-9.9841149,8.4551205],[-9.9842695,8.4544658],[-9.984609,8.4540301],[-9.9859078,8.4531103],[-9.986596,8.4527715],[-9.9870628,8.4523142],[-9.987313,8.451782],[-9.9876729,8.451117],[-9.9880502,8.4502988],[-9.9882746,8.4496536],[-9.9887206,8.4478747],[-9.9885932,8.4470629],[-9.9879641,8.4463073],[-9.9879351,8.4459231],[-9.9879534,8.4454797],[-9.9884658,8.4451024],[-9.988671,8.4450743],[-9.9896764,8.4455705],[-9.9901788,8.4456065],[-9.9904903,8.4455856],[-9.9907593,8.4455436],[-9.9913043,8.4454104],[-9.994596,8.4451444],[-9.9963444,8.4449763],[-9.9973284,8.4446192],[-9.9979442,8.4441291],[-9.9984397,8.443793],[-9.999091,8.4435759],[-9.9995865,8.443485],[-10.0000116,8.4432238],[-10.000712,8.4426798],[-10.0016705,8.4422156],[-10.004393,8.4413564],[-10.0052358,8.4416486],[-10.0060197,8.4419456],[-10.0072711,8.4418366],[-10.0091678,8.4415075],[-10.0103754,8.4412326],[-10.0130388,8.4407311],[-10.0145601,8.4385363],[-10.0161526,8.437682],[-10.0181239,8.4362023],[-10.0210584,8.4346209],[-10.0235596,8.4330668],[-10.0249117,8.4327946],[-10.0253068,8.4330577],[-10.0259054,8.4337147],[-10.0271307,8.4342537],[-10.0292679,8.4354678],[-10.0315736,8.4348701],[-10.0329861,8.4345812],[-10.0344959,8.433958],[-10.0352344,8.4331299],[-10.0358183,8.4309925],[-10.0364688,8.429984],[-10.0373403,8.4295014],[-10.0380389,8.4286928],[-10.0394645,8.4283894],[-10.0404208,8.4282378],[-10.0415377,8.4282341],[-10.0429794,8.4281619],[-10.0445544,8.4279567],[-10.0454248,8.4280067],[-10.0456072,8.4281367],[-10.0457058,8.4283569],[-10.0470708,8.4281619],[-10.0474431,8.4281475],[-10.0481052,8.4280403],[-10.0499171,8.4275092],[-10.0505747,8.4273857],[-10.0510309,8.4274037],[-10.0520352,8.4270749],[-10.0552647,8.4270247],[-10.0560641,8.4275337],[-10.0571379,8.4272804],[-10.0580094,8.4274579],[-10.0585095,8.4279242],[-10.0585292,8.4287006],[-10.0580094,8.4296711],[-10.0573606,8.4318186],[-10.0576736,8.432953],[-10.0586136,8.4351022],[-10.0586482,8.4378233],[-10.0588779,8.4394791],[-10.0588927,8.4442677],[-10.0592577,8.4458671],[-10.0594723,8.4480578],[-10.0593015,8.4488239],[-10.0587576,8.4496687],[-10.0570214,8.4519759],[-10.0568664,8.4537487],[-10.0563816,8.4549612],[-10.0559655,8.4560587],[-10.0553677,8.4578536],[-10.0548856,8.4593411],[-10.0548778,8.4609365],[-10.054581,8.4622487],[-10.0544778,8.4634127],[-10.0554017,8.463765],[-10.0560823,8.4643155],[-10.056305,8.4648371],[-10.0560933,8.465608],[-10.0555129,8.466034],[-10.0548304,8.4664383],[-10.0543081,8.4675156],[-10.0541601,8.4681686],[-10.0538316,8.4687534],[-10.0529374,8.4696631],[-10.0521819,8.4705006],[-10.0512155,8.4721131],[-10.0500922,8.4746325],[-10.0495139,8.4752803],[-10.0482328,8.4760925],[-10.0471198,8.4771576],[-10.0468239,8.478208],[-10.046886,8.4798758],[-10.0470233,8.4805897],[-10.0466195,8.4817133],[-10.0459699,8.4831608],[-10.0454585,8.485025],[-10.0430244,8.4885973],[-10.0427544,8.4891385],[-10.0450519,8.4957104],[-10.0455319,8.496687],[-10.0456669,8.4977789],[-10.045973,8.4986958],[-10.0466589,8.4994558],[-10.0472671,8.5000369],[-10.0484139,8.500903],[-10.0501689,8.5017301],[-10.0518955,8.5027223],[-10.0532478,8.5031569],[-10.054228,8.5031979],[-10.0550699,8.5037567],[-10.0561031,8.5047278],[-10.0579449,8.5060646],[-10.0600561,8.5088039],[-10.0620634,8.5107367],[-10.0634571,8.5113465],[-10.065914,8.5113567],[-10.0671089,8.5110975],[-10.0682884,8.5106114],[-10.0704222,8.5091843],[-10.071246,8.5090391],[-10.0719132,8.5093033],[-10.0726809,8.5115507],[-10.0731087,8.5134445],[-10.0732505,8.516887],[-10.0742449,8.5177734],[-10.074924,8.5181962],[-10.0753908,8.5174059],[-10.0762371,8.5169546],[-10.0784328,8.5159506],[-10.0790678,8.5159756],[-10.079035,8.5170043],[-10.0813376,8.5188881],[-10.0821924,8.5194962],[-10.0826617,8.5195845],[-10.0832603,8.5195629],[-10.0850852,8.519007],[-10.0902242,8.5178664],[-10.0927654,8.5169656],[-10.0936113,8.5164009],[-10.0941369,8.5156284],[-10.0943705,8.5148993],[-10.0947442,8.5144752],[-10.0953924,8.5145022],[-10.0958652,8.5148863],[-10.0963516,8.5148558],[-10.0972898,8.5145239],[-10.0978782,8.5140695],[-10.1001803,8.5132732],[-10.1016221,8.5129964],[-10.102016,8.5147493],[-10.1006374,8.5158206],[-10.1013723,8.5171422],[-10.1023606,8.5177195],[-10.103493,8.5188394],[-10.1048981,8.519552],[-10.1073819,8.5209464],[-10.1082847,8.5218615],[-10.1089186,8.5226809],[-10.1092834,8.52336],[-10.1094355,8.524175],[-10.1094249,8.5246966],[-10.1094128,8.5252907],[-10.1102478,8.5272025],[-10.1104422,8.5274662],[-10.1109679,8.5277527],[-10.1117403,8.5279437],[-10.1130171,8.5280604],[-10.1137037,8.5282089],[-10.1143688,8.5285378],[-10.1159118,8.5295159],[-10.1178073,8.5314202],[-10.1178675,8.532112],[-10.1177472,8.5329378],[-10.1178299,8.5336816],[-10.1181991,8.5342461],[-10.1186198,8.5346933],[-10.1192891,8.5350057],[-10.119626,8.5350843],[-10.1198609,8.5349537],[-10.1202143,8.534537],[-10.1208613,8.5318741],[-10.1218466,8.5298878],[-10.1230577,8.5291887],[-10.1245474,8.52782],[-10.1255261,8.5274308],[-10.1261536,8.526789],[-10.1260633,8.5253478],[-10.1262126,8.5235638],[-10.1265529,8.5230167],[-10.1273668,8.5227275],[-10.1283241,8.5225801],[-10.1308054,8.5232963],[-10.1320393,8.5234661],[-10.1326078,8.5234236],[-10.1339727,8.5228748],[-10.1362758,8.5222751],[-10.1377703,8.5222329],[-10.1398552,8.5225117],[-10.1441209,8.523974],[-10.1459347,8.5242634],[-10.1480676,8.5242476],[-10.1494982,8.5247525],[-10.149993,8.5244927],[-10.1508792,8.5240625],[-10.1518501,8.5242678],[-10.1525599,8.5247553],[-10.1527406,8.5250771],[-10.1530158,8.525567],[-10.154168,8.5258506],[-10.1558633,8.5268197],[-10.157475,8.5272827],[-10.1586769,8.5274615],[-10.1600094,8.5270843],[-10.160879,8.5267357],[-10.1616187,8.526437],[-10.1622513,8.5260361],[-10.162713,8.5256519],[-10.1630437,8.5252154],[-10.163448,8.5243424],[-10.1634855,8.5238906],[-10.1633953,8.5235175],[-10.1633895,8.5234413],[-10.1629905,8.5228326],[-10.1610012,8.5212681],[-10.1605244,8.5211849],[-10.1601167,8.5211743],[-10.159363,8.5209811],[-10.1588525,8.5206182],[-10.1585652,8.520129],[-10.1585706,8.5193243],[-10.1589004,8.5183459],[-10.1600434,8.516866],[-10.1613304,8.5156982],[-10.1625963,8.5150775],[-10.1663726,8.514846],[-10.1668866,8.5147443],[-10.1673693,8.5145214],[-10.1684044,8.5138496],[-10.1693618,8.5134468],[-10.1714893,8.5131974],[-10.1731275,8.512482],[-10.1759007,8.5095922],[-10.1780102,8.5078845],[-10.1791484,8.5075584],[-10.1795739,8.5076531],[-10.1802336,8.5080654],[-10.1807376,8.5080729],[-10.1825205,8.5071661],[-10.1854903,8.5046886],[-10.1867134,8.5035639],[-10.1884031,8.5022635],[-10.1903498,8.5013617],[-10.1919986,8.4998573],[-10.1931156,8.4986579],[-10.1942645,8.4980056],[-10.1952637,8.4962575],[-10.1984395,8.4950691],[-10.2002419,8.4923526],[-10.2012139,8.4897719],[-10.2014096,8.4891288],[-10.2019,8.4875537],[-10.2011002,8.4843729],[-10.2029748,8.4825696],[-10.2050168,8.4823913],[-10.2074891,8.4790124],[-10.2098951,8.4792577],[-10.2119149,8.4814866],[-10.2131165,8.4825053],[-10.2157773,8.4813168],[-10.2186097,8.4802132],[-10.2228154,8.4804679],[-10.2265603,8.4806486],[-10.2286525,8.4819436],[-10.2293497,8.4829007],[-10.229559,8.4834525],[-10.2295214,8.4837231],[-10.2292813,8.4839885],[-10.228985,8.484121],[-10.22825,8.4840945],[-10.2268285,8.4839353],[-10.2262813,8.483983],[-10.2258092,8.4841263],[-10.225069,8.4845614],[-10.22455,8.491122],[-10.2269352,8.4938789],[-10.2317798,8.4907583],[-10.2353912,8.4863463],[-10.238065,8.4866296],[-10.2393064,8.4917298],[-10.2451315,8.4923909],[-10.2547763,8.4897464],[-10.258405,8.4871019],[-10.2636351,8.486651],[-10.2650636,8.4873623],[-10.2660392,8.4907975],[-10.2678079,8.4910312],[-10.2704716,8.4919826],[-10.2737238,8.4915999],[-10.2771304,8.4909376],[-10.2765267,8.4879659],[-10.2772935,8.4866117],[-10.2799137,8.4849993],[-10.2830846,8.4862027],[-10.2862055,8.4869828],[-10.2884076,8.4885844],[-10.2892059,8.4906611],[-10.2901369,8.4914144],[-10.2910423,8.4908707],[-10.2921009,8.4905655],[-10.2935321,8.4916702],[-10.294763,8.4934463],[-10.2968472,8.4930305],[-10.298654,8.4914152],[-10.2993783,8.4914884],[-10.3008297,8.4914998],[-10.3012537,8.4916262],[-10.3015411,8.4920253],[-10.3018516,8.4940007],[-10.3025087,8.4953839],[-10.3025248,8.4965595],[-10.3038951,8.4968238],[-10.304678,8.4968558],[-10.3070124,8.4969511],[-10.3081206,8.4973043],[-10.3084901,8.4978322],[-10.3086379,8.4983032],[-10.3095944,8.4988229],[-10.3106331,8.4992451],[-10.3127363,8.4997682],[-10.314955,8.5007426],[-10.3176811,8.5025699],[-10.3197004,8.5041997],[-10.3222133,8.5061519],[-10.3230862,8.5063953],[-10.3239121,8.5063606],[-10.3247145,8.5058564],[-10.3251473,8.5053482],[-10.3263371,8.5039504],[-10.3272627,8.5025601],[-10.3281707,8.5019229],[-10.3294769,8.501158],[-10.33182,8.5006656],[-10.3334485,8.5004166],[-10.3347958,8.4998778],[-10.3358442,8.499084],[-10.3369697,8.4974867],[-10.3382036,8.4949052],[-10.3392273,8.4940506],[-10.3403126,8.4936842],[-10.3419072,8.4936487],[-10.343171,8.494466],[-10.3443968,8.4939896],[-10.3453894,8.4935977],[-10.3481833,8.4912403],[-10.3505256,8.4899237],[-10.3524096,8.4894201],[-10.353799,8.4888948],[-10.3546938,8.4878877],[-10.3550357,8.4862544],[-10.3559268,8.4837436],[-10.3565269,8.483078],[-10.3572943,8.482837],[-10.3579272,8.4828191],[-10.3582945,8.4829557],[-10.3584328,8.4832327],[-10.3581236,8.4841285],[-10.3582218,8.4847113],[-10.3588765,8.4854486],[-10.3614149,8.4865962],[-10.3622842,8.4865963],[-10.3632225,8.4864092],[-10.3645392,8.4867366],[-10.3664159,8.4868337],[-10.3678599,8.4864918],[-10.3685146,8.4860925],[-10.3712119,8.4835261],[-10.3749375,8.479882],[-10.3751158,8.4798749],[-10.3751994,8.480026],[-10.3751776,8.4804145],[-10.3752904,8.4808192],[-10.376716,8.4830927],[-10.3782945,8.4861036],[-10.3793276,8.4888665],[-10.3796295,8.4896434],[-10.380353,8.4901728],[-10.382053,8.490906],[-10.3826472,8.4909976],[-10.3832362,8.4907204],[-10.3836759,8.4903794],[-10.3840253,8.4891984],[-10.3845637,8.4888135],[-10.3857931,8.4881839],[-10.3866841,8.4872198],[-10.3871861,8.4861478],[-10.3877534,8.4836368],[-10.3883173,8.4826512],[-10.3892884,8.4816584],[-10.3895356,8.4809963],[-10.3893102,8.4802734],[-10.3889574,8.4796474],[-10.3889974,8.4790071],[-10.3896121,8.4781545],[-10.3899394,8.4773595],[-10.3900479,8.4765406],[-10.3906092,8.4742139],[-10.3930851,8.4709843],[-10.393735,8.4688409],[-10.3940503,8.4676735],[-10.3939966,8.4665881],[-10.3943695,8.4647763],[-10.394001,8.4631763],[-10.3936959,8.4606995],[-10.3943001,8.4576305],[-10.3994479,8.4496777],[-10.4030132,8.4457884],[-10.4069303,8.4425241],[-10.4093096,8.4411243],[-10.4127403,8.441233],[-10.4162727,8.436817],[-10.4194506,8.4335535],[-10.4229972,8.4283949],[-10.4249247,8.4245399],[-10.4265369,8.4203481],[-10.4286806,8.4181346],[-10.4292496,8.4155424],[-10.4311495,8.4116386],[-10.4339959,8.4100681],[-10.4371017,8.4062051],[-10.4382996,8.4046159],[-10.4407711,8.403512],[-10.4443382,8.4003301],[-10.4463476,8.3989767],[-10.4474266,8.3971183],[-10.4497925,8.3942004],[-10.454726,8.3908689],[-10.4568252,8.3904267],[-10.4615377,8.390413],[-10.4629548,8.3899021],[-10.4634643,8.3855756],[-10.4655371,8.3840042],[-10.4678744,8.3819323],[-10.4692274,8.3809935],[-10.4710687,8.3803346],[-10.4750379,8.3792583],[-10.4782165,8.3767155],[-10.4812269,8.3719565],[-10.4823213,8.3696851],[-10.482053,8.3664157],[-10.4790133,8.3645246],[-10.4797637,8.3629047],[-10.4834021,8.3604096],[-10.4868169,8.35793],[-10.4891657,8.3531915],[-10.4907614,8.3500564],[-10.4932964,8.347315],[-10.496332,8.3446318],[-10.4982326,8.3421748],[-10.5034113,8.3405368],[-10.5068145,8.3368852],[-10.5085963,8.3345254],[-10.511183,8.3337497],[-10.5175531,8.328042],[-10.5201763,8.3260432],[-10.5242655,8.3232446],[-10.5289369,8.3192237],[-10.5366277,8.3141573],[-10.5405431,8.3118034],[-10.5424925,8.3092041],[-10.5485688,8.3097299],[-10.55253,8.3083754],[-10.5562283,8.3056151],[-10.5571789,8.3086261],[-10.5588075,8.3092284],[-10.5603245,8.311813],[-10.5615881,8.3117726],[-10.5658931,8.3088847],[-10.5671014,8.3075126],[-10.5677347,8.3074485],[-10.5703406,8.3086854],[-10.5724262,8.3089217],[-10.5723755,8.3118645],[-10.5723139,8.3145628],[-10.5734199,8.3172864],[-10.5743933,8.323879],[-10.5760256,8.3290134],[-10.5769546,8.3335325],[-10.5772851,8.3340512],[-10.5814301,8.3337155],[-10.5858027,8.3374209],[-10.5874582,8.3374463],[-10.5922483,8.337641],[-10.5959567,8.3377059],[-10.6001494,8.3395559],[-10.6039822,8.3398952],[-10.6046351,8.3408789],[-10.6059269,8.3409047],[-10.6094803,8.3389068],[-10.6125443,8.3377403],[-10.6166669,8.3380884],[-10.6192294,8.339899],[-10.6224762,8.3431458],[-10.6231402,8.3441048],[-10.6243138,8.3462824],[-10.6233313,8.3493773],[-10.6234119,8.3507435],[-10.6238543,8.3512209],[-10.6246029,8.3515192],[-10.6275683,8.3501773],[-10.6297647,8.3475787],[-10.6306203,8.3468941],[-10.6318578,8.3467503],[-10.6335857,8.3430729],[-10.6347752,8.3423298],[-10.6353971,8.3420469],[-10.6358184,8.3420099],[-10.6366779,8.3421797],[-10.6372537,8.3427868],[-10.6381022,8.3445333],[-10.6385196,8.34757],[-10.6386857,8.3488792],[-10.6380786,8.3508722],[-10.6384869,8.3524816],[-10.6392606,8.3536926],[-10.6408767,8.3537443],[-10.6426503,8.3544491],[-10.6446893,8.3532351],[-10.6486728,8.3526848],[-10.651665,8.3511556],[-10.6574834,8.3505092],[-10.6590222,8.3502889],[-10.6629065,8.3489037],[-10.6631152,8.3477735],[-10.6631955,8.3468097],[-10.6635679,8.3459328],[-10.6646005,8.3458875],[-10.6649903,8.3456904],[-10.665458,8.3447989],[-10.6655648,8.3442534],[-10.6655484,8.3438676],[-10.6659722,8.3418837],[-10.6659036,8.3403569],[-10.6661453,8.3398038],[-10.6670389,8.3393176],[-10.6693338,8.337437],[-10.6725102,8.3339291],[-10.6734193,8.332204],[-10.6732091,8.32894],[-10.6730914,8.3270706],[-10.6755631,8.3231643],[-10.6760944,8.3181448],[-10.6770489,8.3152334],[-10.6791222,8.3153875],[-10.6803411,8.3159121],[-10.6829669,8.31541],[-10.6847831,8.3096608],[-10.685096,8.3041783],[-10.6866148,8.2974293],[-10.6857501,8.2925901],[-10.6854088,8.2865024]]]]}]}
