# Supplementary material
Source: ML conference proceedings conference paper supplement (https://proceedings.neurips.cc/paper_files/paper/2022/hash/9d3faa41886997cfc2128b930077fa49-Abstract.html)
Supplement: Supplementary file 1 [file 9d3faa41886997cfc2128b930077fa49-Supplemental-Conference.zip › code/ebola/map/geojson/port_loko.geojson]

{"type":"GeometryCollection","geometries":[{"type":"MultiPolygon","coordinates":[[[[-13.4842703,8.574],[-13.1916462,8.5132246],[-13.138918,8.4808337],[-13.1378318,8.4652558],[-13.1370522,8.453459],[-13.1374439,8.4529922],[-13.1376944,8.4526934],[-13.1377925,8.4520184],[-13.1378139,8.451639],[-13.1378032,8.451448],[-13.1377871,8.4513286],[-13.1377415,8.451058],[-13.1377093,8.4508643],[-13.1376074,8.4505406],[-13.1375376,8.4503364],[-13.1374545,8.4501108],[-13.1373417,8.4499012],[-13.137256,8.4497102],[-13.1371626,8.4495377],[-13.1371315,8.4494443],[-13.1370914,8.4491913],[-13.1370556,8.4489654],[-13.1370205,8.4487444],[-13.1369821,8.4485025],[-13.1369466,8.4482791],[-13.1369096,8.4480455],[-13.1367356,8.4474392],[-13.1365871,8.4471201],[-13.1365184,8.4469722],[-13.1363761,8.4468978],[-13.136242,8.4468846],[-13.1361106,8.4468793],[-13.1360409,8.4468448],[-13.1360489,8.4467625],[-13.1361455,8.4467015],[-13.1362233,8.4466511],[-13.1362769,8.4466166],[-13.136336,8.4464708],[-13.1362931,8.4463302],[-13.1361589,8.4462399],[-13.1359255,8.4461762],[-13.1357914,8.4461735],[-13.1356198,8.4461629],[-13.1354803,8.4461417],[-13.1354022,8.4461256],[-13.135403,8.4460781],[-13.135404,8.4460225],[-13.1354319,8.4459785],[-13.1356385,8.4458976],[-13.135896,8.445818],[-13.1359899,8.4457597],[-13.1361027,8.4456271],[-13.1361,8.445521],[-13.1360758,8.4454201],[-13.1358988,8.4450487],[-13.1358505,8.4449267],[-13.135813,8.4448338],[-13.1357727,8.4447436],[-13.1357182,8.4445701],[-13.1355921,8.4442952],[-13.1354927,8.4440782],[-13.1352672,8.4435865],[-13.1352089,8.4434595],[-13.1349955,8.4431927],[-13.1346324,8.4427388],[-13.1344101,8.4424409],[-13.1342277,8.4421966],[-13.1339541,8.4417425],[-13.1337856,8.441463],[-13.1336566,8.4412489],[-13.1334767,8.4409602],[-13.1334044,8.4408037],[-13.1333453,8.4405596],[-13.133289,8.4404535],[-13.1332702,8.4403341],[-13.1332515,8.4402306],[-13.1332273,8.4400237],[-13.1332082,8.4399479],[-13.1331999,8.4397912],[-13.1331929,8.4396604],[-13.1331817,8.43945],[-13.133134,8.4391863],[-13.1330901,8.4389441],[-13.1330285,8.4386034],[-13.1329771,8.4383197],[-13.1328571,8.4380736],[-13.1323421,8.4376967],[-13.1316177,8.4371953],[-13.1293541,8.4359616],[-13.1277413,8.4351791],[-13.1275696,8.4350955],[-13.1259602,8.4343224],[-13.1251484,8.4339319],[-13.123295,8.4330856],[-13.1228122,8.432868],[-13.1198671,8.4317139],[-13.1195346,8.4315971],[-13.1177763,8.4308154],[-13.1172482,8.4306314],[-13.1166513,8.4304237],[-13.116324,8.4305543],[-13.1162181,8.4306197],[-13.1161121,8.4307002],[-13.1155236,8.4307037],[-13.1149394,8.430747],[-13.1139421,8.4305228],[-13.1121915,8.430049],[-13.111496,8.4299547],[-13.1109274,8.4296787],[-13.1102381,8.4292551],[-13.1095111,8.4288509],[-13.1088781,8.4282778],[-13.107573,8.4274181],[-13.1055727,8.426084],[-13.1046457,8.4254814],[-13.1032509,8.4246986],[-13.1030712,8.4246004],[-13.1029478,8.4245687],[-13.1015933,8.4244997],[-13.1000861,8.424164],[-13.0985259,8.4239308],[-13.0961592,8.4230181],[-13.0953247,8.4225842],[-13.0946137,8.4223736],[-13.0941069,8.4222641],[-13.093251,8.42242],[-13.0927539,8.4223145],[-13.0925168,8.4213369],[-13.0923406,8.4210185],[-13.0912508,8.4202013],[-13.090328,8.4195752],[-13.0887724,8.4192036],[-13.0872059,8.4189596],[-13.0855107,8.4190233],[-13.0845666,8.4189384],[-13.0825818,8.4192036],[-13.080436,8.4200103],[-13.0792988,8.4204666],[-13.0777001,8.4210397],[-13.0759299,8.4222284],[-13.0754042,8.4228333],[-13.0745152,8.4223417],[-13.0730975,8.4211777],[-13.0730009,8.4203499],[-13.0720461,8.4190551],[-13.0712307,8.4181742],[-13.0703724,8.4177072],[-13.0694282,8.4173782],[-13.0683231,8.4171447],[-13.0672288,8.4172614],[-13.0664003,8.4176116],[-13.0656088,8.4183227],[-13.0650187,8.4188322],[-13.0644286,8.4192143],[-13.0637419,8.4194796],[-13.0632262,8.4199072],[-13.0624103,8.420763],[-13.0618966,8.4201483],[-13.0617976,8.4200157],[-13.0617226,8.4198774],[-13.0616381,8.4196737],[-13.0615721,8.4194504],[-13.0621152,8.4191738],[-13.0622177,8.4190722],[-13.0624063,8.4188852],[-13.0624075,8.4188838],[-13.0628596,8.4183387],[-13.0631318,8.4179221],[-13.0632968,8.4175851],[-13.0633905,8.4173534],[-13.0635328,8.4170015],[-13.0637581,8.4166193],[-13.0639537,8.4161231],[-13.0639545,8.4161208],[-13.0642379,8.4156107],[-13.0643158,8.4155258],[-13.0648614,8.4149305],[-13.0655177,8.4140721],[-13.0659683,8.4135892],[-13.0663867,8.41317],[-13.0665315,8.4128304],[-13.066553,8.4121671],[-13.0665852,8.4119495],[-13.0666066,8.4117107],[-13.06673,8.411525],[-13.0671162,8.4114189],[-13.0675347,8.4114242],[-13.0677975,8.411525],[-13.0679263,8.4117479],[-13.0679155,8.4120132],[-13.0679531,8.4122786],[-13.0680389,8.4124961],[-13.068232,8.4127454],[-13.0683071,8.4127773],[-13.0685378,8.4127667],[-13.0687765,8.4125021],[-13.0691661,8.4125361],[-13.0697852,8.4125905],[-13.0704046,8.4125969],[-13.0707834,8.4126126],[-13.0713059,8.412634],[-13.072361,8.4131944],[-13.0728615,8.4135043],[-13.0733779,8.4138343],[-13.0741268,8.4143309],[-13.0747864,8.4144824],[-13.0749537,8.4144649],[-13.075238,8.4144384],[-13.0756618,8.4142473],[-13.0760802,8.414088],[-13.0771102,8.4136847],[-13.0777139,8.4133501],[-13.0784459,8.4128675],[-13.079331,8.4123952],[-13.0797709,8.412167],[-13.0801518,8.4119322],[-13.0802577,8.411866],[-13.0803288,8.4117917],[-13.0804522,8.4115383],[-13.0804388,8.4113047],[-13.080361,8.4106627],[-13.0802993,8.4104477],[-13.0799989,8.4099913],[-13.0795885,8.4095083],[-13.0794356,8.4092829],[-13.0793619,8.409129],[-13.0791875,8.4088437],[-13.0791379,8.4087483],[-13.0790584,8.4086321],[-13.0789729,8.4084868],[-13.0789019,8.4083476],[-13.0788402,8.4082746],[-13.0786618,8.4079588],[-13.0785236,8.4074228],[-13.0783925,8.4070871],[-13.0783586,8.4070004],[-13.0783361,8.4069428],[-13.0783201,8.4069019],[-13.0782863,8.4068153],[-13.078285,8.4066269],[-13.07823,8.4064836],[-13.078065,8.4061996],[-13.0779684,8.4059342],[-13.0779215,8.4058189],[-13.0778047,8.4056875],[-13.0776545,8.4055813],[-13.0774105,8.4056185],[-13.0773435,8.4056451],[-13.0772254,8.4056318],[-13.0771128,8.4055708],[-13.0765818,8.4052418],[-13.0764002,8.4051246],[-13.0763221,8.4050742],[-13.0762653,8.4050374],[-13.0761661,8.4048794],[-13.0760855,8.4047508],[-13.0760269,8.4046147],[-13.0759993,8.4045578],[-13.075914,8.4044226],[-13.0757279,8.4041272],[-13.075651,8.4040052],[-13.0755223,8.4038037],[-13.0754955,8.4037108],[-13.0754901,8.4036232],[-13.0754821,8.4035091],[-13.0754355,8.4033998],[-13.0753506,8.4033075],[-13.0752728,8.4031853],[-13.075136,8.402843],[-13.0750717,8.4025698],[-13.0750131,8.4021995],[-13.0749966,8.4020948],[-13.0749349,8.4011688],[-13.0749851,8.4007143],[-13.0750062,8.400523],[-13.0751064,8.4000649],[-13.0751077,8.4000619],[-13.075203,8.3998155],[-13.0752459,8.3996748],[-13.0752804,8.3994477],[-13.0753131,8.3992636],[-13.075356,8.3989585],[-13.0753601,8.3987626],[-13.075364,8.3985738],[-13.0752675,8.3981784],[-13.0751651,8.3978515],[-13.0749483,8.3972444],[-13.0747874,8.3967429],[-13.0747069,8.3965518],[-13.0746291,8.396459],[-13.0745728,8.3964138],[-13.0744038,8.3963847],[-13.0739451,8.3963608],[-13.0736823,8.3963422],[-13.0735643,8.3962201],[-13.0735199,8.3960038],[-13.0737252,8.395838],[-13.0738996,8.3957399],[-13.073921,8.395578],[-13.0739022,8.3954347],[-13.0737467,8.3949677],[-13.0735696,8.3945936],[-13.0733604,8.3940284],[-13.0732961,8.3938214],[-13.0732156,8.3936463],[-13.0730949,8.3935269],[-13.0730143,8.3934578],[-13.0725719,8.3933226],[-13.0723331,8.3932721],[-13.072199,8.3932801],[-13.0718933,8.3932827],[-13.0716814,8.3932536],[-13.0715741,8.393174],[-13.0713971,8.393089],[-13.0712656,8.3931262],[-13.0711798,8.3932191],[-13.0710269,8.3933332],[-13.0709786,8.3935003],[-13.0709786,8.3935534],[-13.0708392,8.3936728],[-13.0705066,8.3936887],[-13.0703993,8.3936728],[-13.0697394,8.3934499],[-13.0691333,8.3930836],[-13.0688758,8.3927494],[-13.0688007,8.3923248],[-13.0687202,8.391948],[-13.0687631,8.3913643],[-13.0687578,8.3909502],[-13.068629,8.3905629],[-13.0683071,8.3897828],[-13.0682213,8.3888116],[-13.0680604,8.3878404],[-13.0679531,8.3870284],[-13.0679477,8.3862695],[-13.0679476,8.3859511],[-13.0678618,8.385622],[-13.067422,8.3848207],[-13.0671376,8.3843325],[-13.0669499,8.3839397],[-13.0667086,8.3835258],[-13.0664939,8.3832074],[-13.0662064,8.382845],[-13.06592,8.382459],[-13.0654103,8.3817796],[-13.064831,8.3813869],[-13.0644019,8.3812171],[-13.063903,8.3810685],[-13.0634148,8.3808774],[-13.0627282,8.3805749],[-13.0620522,8.3802618],[-13.0614997,8.3800495],[-13.0610866,8.3798532],[-13.0607835,8.3797178],[-13.0603838,8.3795879],[-13.0601103,8.3795029],[-13.0591559,8.3793842],[-13.0577248,8.379273],[-13.0565197,8.3791794],[-13.0553319,8.3790871],[-13.0543484,8.3790107],[-13.0531098,8.378797],[-13.0527234,8.3787016],[-13.0516613,8.3787015],[-13.0501486,8.378606],[-13.0494083,8.3785635],[-13.0481638,8.3782557],[-13.0471338,8.3779797],[-13.0464364,8.377916],[-13.0459964,8.3780966],[-13.0457337,8.3782733],[-13.0452291,8.3781205],[-13.0451543,8.3778606],[-13.044377,8.3777426],[-13.0431651,8.3779608],[-13.042596,8.3779905],[-13.0423017,8.3777955],[-13.0420946,8.3774098],[-13.0415571,8.3771995],[-13.0422898,8.3768299],[-13.0406285,8.3744833],[-13.0395155,8.3721475],[-13.0383259,8.3712016],[-13.0373078,8.3709525],[-13.0366655,8.371216],[-13.0359941,8.3723569],[-13.0359649,8.3734725],[-13.0360342,8.3743858],[-13.0354868,8.3753678],[-13.0345891,8.3756169],[-13.033987,8.3751729],[-13.0331623,8.3741006],[-13.0322537,8.3734436],[-13.0307648,8.3734327],[-13.0289402,8.3736674],[-13.0274258,8.3738335],[-13.0261632,8.3739129],[-13.025375,8.3740068],[-13.0248714,8.3747577],[-13.0242985,8.3757253],[-13.0239117,8.3767542],[-13.0238022,8.3777975],[-13.0239044,8.3790033],[-13.0235066,8.3798084],[-13.0231928,8.3801803],[-13.0229629,8.3811081],[-13.0229702,8.381924],[-13.0228096,8.3825774],[-13.0222841,8.3828121],[-13.0216163,8.3828771],[-13.0208099,8.3825883],[-13.0201311,8.3820467],[-13.0195692,8.3814836],[-13.0190875,8.3808012],[-13.0186423,8.3803572],[-13.0181533,8.3797832],[-13.0180438,8.3792236],[-13.0183248,8.3788048],[-13.0186496,8.3781513],[-13.0185036,8.3775917],[-13.0179818,8.3771441],[-13.0175074,8.3771694],[-13.017106,8.3776279],[-13.0167046,8.3780358],[-13.0161097,8.3781802],[-13.0155806,8.3781297],[-13.0151464,8.3778048],[-13.0151391,8.3772632],[-13.0156463,8.3767542],[-13.015712,8.3762668],[-13.0154821,8.3758624],[-13.0149821,8.3757722],[-13.0138692,8.3758985],[-13.0131941,8.3759996],[-13.0127264,8.3760103],[-13.0125591,8.3760141],[-13.011822,8.3765015],[-13.0112965,8.3769058],[-13.0110593,8.377274],[-13.0103586,8.3775845],[-13.0095628,8.3780955],[-13.0069722,8.3786104],[-13.005655,8.3806296],[-13.0037154,8.3806009],[-13.0022245,8.3814315],[-13.0012895,8.3812625],[-13.000591,8.3817579],[-12.9943296,8.3861173],[-12.9895289,8.3813679],[-12.9865268,8.3811321],[-12.9811276,8.3807083],[-12.9716595,8.3888878],[-12.9645918,8.3906028],[-12.9623248,8.3845342],[-12.9427219,8.38493],[-12.9301603,8.3765676],[-12.9284531,8.3754311],[-12.9359648,8.3655504],[-12.9401882,8.3599949],[-12.9313869,8.351287],[-12.9309868,8.3416553],[-12.926968,8.336421],[-12.9259283,8.3324692],[-12.9259378,8.3294844],[-12.9247479,8.3279089],[-12.9213983,8.3257433],[-12.9211404,8.321775],[-12.9198888,8.3185126],[-12.9195928,8.3147441],[-12.9183681,8.3139318],[-12.9183143,8.3120276],[-12.9170762,8.3103497],[-12.9161341,8.3081126],[-12.915946,8.3023681],[-12.9136851,8.3012761],[-12.9138466,8.2958429],[-12.9159503,8.2945614],[-12.9181009,8.2907007],[-12.9216028,8.2850884],[-12.9251427,8.2814912],[-12.9268175,8.2790993],[-12.9273218,8.2790949],[-12.9273218,8.2787064],[-12.9269946,8.277897],[-12.9272236,8.2775409],[-12.9278616,8.2778646],[-12.928107,8.2775247],[-12.9271255,8.2768286],[-12.9274036,8.2765211],[-12.9280742,8.2766182],[-12.9281397,8.2761811],[-12.9277962,8.2751613],[-12.9279925,8.2744329],[-12.9276162,8.2737854],[-12.9281233,8.2731541],[-12.9279761,8.2724418],[-12.9289903,8.2713734],[-12.9298736,8.2716],[-12.9295792,8.270564],[-12.9298082,8.2700136],[-12.931035,8.2697546],[-12.9324909,8.2686377],[-12.9331288,8.2685405],[-12.9338159,8.2675369],[-12.9341757,8.2668246],[-12.9326381,8.2668246],[-12.9322455,8.2656591],[-12.9334233,8.2641374],[-12.9340326,8.2638523],[-12.9351062,8.2633576],[-12.9337125,8.261493],[-12.9317449,8.2597892],[-12.9288248,8.2598187],[-12.9238191,8.26147],[-12.9225033,8.2619426],[-12.9197966,8.2629149],[-12.9159826,8.2625905],[-12.9137777,8.2624726],[-12.9123475,8.26377],[-12.9123773,8.2663943],[-12.9132414,8.2689302],[-12.9131386,8.27061],[-12.9118692,8.2719097],[-12.9087201,8.2732548],[-12.9053288,8.2766774],[-12.9037408,8.2769837],[-12.9022335,8.2766108],[-12.9001341,8.2732814],[-12.898896,8.2727886],[-12.8942262,8.2738674],[-12.8926247,8.2746265],[-12.8905119,8.2759449],[-12.8873763,8.2767173],[-12.8837965,8.278129],[-12.883164,8.2786617],[-12.883016,8.28006],[-12.8836216,8.2815782],[-12.8861382,8.2837089],[-12.8871878,8.2852937],[-12.8918577,8.2854269],[-12.8928401,8.2865056],[-12.8930958,8.2882235],[-12.8924363,8.2895419],[-12.8887759,8.2923917],[-12.8865419,8.2946556],[-12.8856268,8.2962403],[-12.8853711,8.299423],[-12.8858017,8.3026589],[-12.8845636,8.3089976],[-12.8845636,8.3107554],[-12.8840791,8.3113812],[-12.8825046,8.3116875],[-12.8786422,8.3099164],[-12.878077,8.3089576],[-12.8774041,8.3074396],[-12.8760853,8.3041637],[-12.8754259,8.3032848],[-12.8732995,8.3022994],[-12.8720614,8.3021929],[-12.8705945,8.3024991],[-12.8679299,8.3039773],[-12.8657632,8.3040439],[-12.8628698,8.3082252],[-12.8622373,8.3093571],[-12.8628698,8.3123933],[-12.8639061,8.3128993],[-12.8649154,8.3130324],[-12.8657767,8.3135518],[-12.8675666,8.3158422],[-12.868549,8.3183589],[-12.868872,8.3197038],[-12.8688228,8.321074],[-12.8687912,8.3219542],[-12.8683067,8.3245775],[-12.8658709,8.3292247],[-12.8638253,8.3328865],[-12.8631659,8.333246],[-12.8619238,8.332618],[-12.8607166,8.3320077],[-12.8587787,8.3316881],[-12.8540282,8.3319145],[-12.8519422,8.332234],[-12.849937,8.3328199],[-12.8486855,8.3332993],[-12.8479857,8.3343912],[-12.8475012,8.3375736],[-12.8472859,8.339451],[-12.8472993,8.3408624],[-12.8481068,8.3418877],[-12.8512559,8.342913],[-12.8525478,8.3437918],[-12.8535437,8.3446839],[-12.8545934,8.345829],[-12.8556296,8.347307],[-12.8558853,8.3485853],[-12.855522,8.3494774],[-12.8547145,8.3505026],[-12.8541089,8.3516877],[-12.8535841,8.3524067],[-12.8525882,8.3527395],[-12.850731,8.3523135],[-12.8490623,8.3518208],[-12.8477434,8.3518741],[-12.8464111,8.3521936],[-12.845348,8.3529925],[-12.843114,8.3553759],[-12.8416067,8.356694],[-12.8397092,8.3569204],[-12.8386057,8.3571867],[-12.8377309,8.3580388],[-12.8374618,8.3592372],[-12.8377175,8.3604355],[-12.8398169,8.3636976],[-12.8407185,8.3663471],[-12.8409473,8.3683177],[-12.8406916,8.3707009],[-12.8399918,8.3718859],[-12.8387403,8.3728978],[-12.8359814,8.3737233],[-12.834205,8.3735635],[-12.8326036,8.3731641],[-12.8298582,8.3732706],[-12.8253499,8.374136],[-12.8246097,8.3746819],[-12.824354,8.3759734],[-12.8248789,8.3772648],[-12.8263996,8.3791421],[-12.8268168,8.3806599],[-12.8266687,8.383083],[-12.8262919,8.3863849],[-12.8265745,8.3886083],[-12.827207,8.3906719],[-12.828795,8.3923228],[-12.8298582,8.3940402],[-12.830235,8.3957177],[-12.8293603,8.3963168],[-12.8278799,8.3962369],[-12.8246097,8.3952917],[-12.8225513,8.3948104],[-12.8206128,8.3944529],[-12.819738,8.394413],[-12.8189171,8.3948923],[-12.8169792,8.3965165],[-12.8161836,8.3967126],[-12.8156874,8.396835],[-12.8136986,8.3963737],[-12.8111007,8.395037],[-12.8107201,8.3943591],[-12.8104441,8.3931353],[-12.8099969,8.390151],[-12.8092451,8.3884753],[-12.8085028,8.3875998],[-12.8079033,8.3873927],[-12.8062951,8.3879575],[-12.8050676,8.3881364],[-12.8030311,8.3881458],[-12.8013087,8.3883153],[-12.800852,8.3884],[-12.7994341,8.3894073],[-12.7984254,8.3903299],[-12.7970551,8.3911678],[-12.7941527,8.3911772],[-12.7924113,8.391855],[-12.7916024,8.392401],[-12.7905747,8.3930977],[-12.7898895,8.3929564],[-12.7897373,8.3920433],[-12.790156,8.3887107],[-12.7902226,8.3871291],[-12.7900228,8.385764],[-12.7895184,8.3853404],[-12.7891092,8.3853498],[-12.7881767,8.3858487],[-12.7867302,8.3869314],[-12.7848936,8.3875715],[-12.7835995,8.3874586],[-12.7831522,8.386809],[-12.7827621,8.3857452],[-12.7823624,8.3842766],[-12.7808208,8.3806709],[-12.780345,8.3793811],[-12.7792887,8.3789669],[-12.7773379,8.379174],[-12.7762626,8.3790328],[-12.7758534,8.3787597],[-12.772009,8.375813],[-12.7715141,8.3752575],[-12.7713333,8.3736382],[-12.7710954,8.3732993],[-12.7700677,8.3725744],[-12.7681074,8.3721131],[-12.7670226,8.3724238],[-12.7663089,8.3737512],[-12.7656713,8.373723],[-12.7650908,8.3729792],[-12.7647863,8.3719813],[-12.7647768,8.3713034],[-12.7654429,8.3705691],[-12.7657284,8.3698818],[-12.7653953,8.3685732],[-12.7649671,8.3674246],[-12.7644247,8.3665867],[-12.7631971,8.3660783],[-12.762493,8.3651368],[-12.7620647,8.3643271],[-12.7613986,8.3625195],[-12.7610414,8.3608904],[-12.7606278,8.3590642],[-12.7601793,8.3590194],[-12.7567291,8.3575299],[-12.7533947,8.3569978],[-12.7536624,8.3518698],[-12.748447,8.354763],[-12.7454354,8.353486],[-12.7448229,8.3515285],[-12.7434622,8.3513052],[-12.7431087,8.3502476],[-12.7437201,8.3497257],[-12.7436601,8.3493461],[-12.7416223,8.3490497],[-12.7411548,8.3494767],[-12.7410499,8.3511653],[-12.7407233,8.3515759],[-12.7390331,8.3514098],[-12.7368415,8.3496092],[-12.7357193,8.3492594],[-12.7342348,8.3497666],[-12.7330154,8.3497142],[-12.7323704,8.3501513],[-12.7320257,8.3502125],[-12.7318137,8.3497841],[-12.7318579,8.3495393],[-12.7315221,8.3475285],[-12.7309476,8.3473362],[-12.7286415,8.3476684],[-12.727749,8.347887],[-12.727696,8.3486563],[-12.7271128,8.3490847],[-12.7263974,8.3493357],[-12.7252572,8.3491371],[-12.7231012,8.3506496],[-12.7215572,8.3508255],[-12.7205002,8.3513941],[-12.7195614,8.3523123],[-12.7180809,8.3534559],[-12.7179924,8.3537181],[-12.7181251,8.3540154],[-12.7206257,8.356743],[-12.7206457,8.3573115],[-12.7207317,8.3574774],[-12.7208744,8.3575697],[-12.7224106,8.3580718],[-12.7225697,8.3586663],[-12.7223929,8.3591121],[-12.7182229,8.3625314],[-12.7186835,8.3646452],[-12.7198599,8.3676437],[-12.7196684,8.3679107],[-12.7192973,8.3677096],[-12.7181269,8.3665549],[-12.7140281,8.365511],[-12.7115065,8.3651779],[-12.7101965,8.3645443],[-12.7092505,8.3634355],[-12.708188,8.3633347],[-12.7072936,8.3640216],[-12.7068198,8.3641555],[-12.7039671,8.3636658],[-12.6996152,8.3642341],[-12.6962311,8.3639619],[-12.6954385,8.3640417],[-12.6912622,8.3660619],[-12.6896314,8.3661893],[-12.6894061,8.3663698],[-12.6882152,8.3676222],[-12.6875608,8.368015],[-12.6862197,8.367824],[-12.6850395,8.3679513],[-12.6841266,8.3687035],[-12.6808367,8.3696208],[-12.6785515,8.3689947],[-12.6785777,8.367735],[-12.679015,8.365995],[-12.674813,8.3643301],[-12.6733774,8.3657692],[-12.6731683,8.3666722],[-12.6732979,8.3699253],[-12.6730723,8.3701526],[-12.6707917,8.3705289],[-12.6705181,8.3709219],[-12.6708633,8.3726489],[-12.6705833,8.3733578],[-12.6697495,8.3743308],[-12.669686,8.3752718],[-12.6694304,8.3754842],[-12.6679584,8.3756264],[-12.6662852,8.3764541],[-12.6603815,8.3748839],[-12.6601449,8.3746977],[-12.6598788,8.3726247],[-12.6591631,8.3721176],[-12.6582839,8.372345],[-12.6569059,8.3728178],[-12.6559325,8.3721321],[-12.6556349,8.3720814],[-12.6542258,8.3741684],[-12.6540068,8.374138],[-12.6538937,8.3737882],[-12.653585,8.3709422],[-12.6522943,8.3700909],[-12.6518775,8.3685878],[-12.6501566,8.3679892],[-12.649081,8.3683617],[-12.6476558,8.3673109],[-12.6466071,8.3675237],[-12.6461045,8.3670943],[-12.6425128,8.3699227],[-12.635643,8.3721692],[-12.6331669,8.3783341],[-12.6325176,8.3799505],[-12.6314938,8.3898305],[-12.6279979,8.406063],[-12.6218558,8.4263062],[-12.6217304,8.4267902],[-12.6193281,8.4367297],[-12.6180842,8.4470942],[-12.608931,8.485658],[-12.6079108,8.4878355],[-12.6050113,8.4940244],[-12.6016387,8.496925],[-12.5975386,8.4923459],[-12.5926369,8.4888498],[-12.5891492,8.488943],[-12.5828336,8.4831161],[-12.5823479,8.4821018],[-12.5820066,8.4810395],[-12.5817568,8.4797961],[-12.5813293,8.479222],[-12.5808995,8.4787096],[-12.5808877,8.4784243],[-12.5811526,8.4781099],[-12.5810526,8.477516],[-12.5812998,8.4771724],[-12.5815139,8.4763567],[-12.5815471,8.4756818],[-12.5812292,8.4751578],[-12.5812998,8.474593],[-12.5811939,8.4739408],[-12.5805051,8.4736264],[-12.5804992,8.4729102],[-12.5804815,8.4722406],[-12.5801401,8.4717573],[-12.5794749,8.4711051],[-12.5791864,8.4705345],[-12.5792217,8.4702317],[-12.5795985,8.4699347],[-12.579728,8.4695679],[-12.5795985,8.4690438],[-12.5792335,8.4686071],[-12.5793041,8.4680423],[-12.5793865,8.4675066],[-12.579157,8.4668253],[-12.5701116,8.4630165],[-12.568112,8.4545116],[-12.5661123,8.4461055],[-12.5613132,8.4434023],[-12.5602134,8.4404024],[-12.5553144,8.4404353],[-12.5512486,8.4362931],[-12.5462106,8.4330183],[-12.5403673,8.4359485],[-12.5361681,8.4464317],[-12.5339959,8.4506513],[-12.532609,8.4524756],[-12.5310772,8.4534196],[-12.5179421,8.4567254],[-12.5007029,8.4620783],[-12.4912381,8.4664693],[-12.4804953,8.4717712],[-12.4656468,8.4786873],[-12.4593057,8.4816941],[-12.4462522,8.4878838],[-12.4115957,8.4935578],[-12.3928318,8.5059697],[-12.3770875,8.5161535],[-12.358157,8.529183],[-12.3375364,8.541286],[-12.3144786,8.5490168],[-12.2847174,8.5724404],[-12.2954898,8.5798424],[-12.3057002,8.5868585],[-12.3176141,8.5907266],[-12.3256356,8.6089942],[-12.3297685,8.6244743],[-12.3295634,8.6343873],[-12.3478859,8.630227],[-12.3576268,8.6396963],[-12.3812492,8.6450099],[-12.3998487,8.6537404],[-12.3986451,8.6684978],[-12.3972264,8.6687002],[-12.393292,8.6686424],[-12.3916686,8.6682231],[-12.3907033,8.6681653],[-12.3897526,8.6684689],[-12.3891529,8.6691195],[-12.3886556,8.6701461],[-12.3885386,8.6710136],[-12.3886995,8.6724161],[-12.3893723,8.6749898],[-12.3903376,8.6770284],[-12.3912298,8.6787345],[-12.3913468,8.6798333],[-12.3912737,8.680831],[-12.3904985,8.6820599],[-12.3889189,8.6840118],[-12.3868567,8.6862817],[-12.3853794,8.6886384],[-12.3845458,8.6905902],[-12.3840605,8.6918023],[-12.3841362,8.6948264],[-12.3845311,8.6970239],[-12.3855111,8.6995107],[-12.3855111,8.7003492],[-12.384575,8.7018962],[-12.3831709,8.7032552],[-12.3799651,8.7056402],[-12.3794354,8.7059402],[-12.3787082,8.706432],[-12.3781546,8.7061681],[-12.3777009,8.7060454],[-12.3776277,8.7051202],[-12.3775491,8.7041274],[-12.3778681,8.702988],[-12.3778746,8.7016233],[-12.3776597,8.7006512],[-12.3774383,8.6997113],[-12.3761944,8.6981661],[-12.3747026,8.696836],[-12.3725683,8.6955254],[-12.3704903,8.6948119],[-12.3663219,8.693077],[-12.3652835,8.6928601],[-12.3635869,8.6929035],[-12.360925,8.6938722],[-12.3569175,8.6955203],[-12.3534219,8.6967493],[-12.3498386,8.697848],[-12.348493,8.6987878],[-12.3454654,8.701766],[-12.342745,8.7041949],[-12.339776,8.7061466],[-12.3375675,8.7077948],[-12.336529,8.7089803],[-12.3358709,8.7101658],[-12.3353882,8.7139535],[-12.3355345,8.7164112],[-12.335593,8.7178135],[-12.3353151,8.7184641],[-12.3345838,8.7190279],[-12.3336916,8.7191291],[-12.3330697,8.7188177],[-12.3321705,8.7182473],[-12.3304593,8.7157607],[-12.327929,8.7128693],[-12.3251062,8.7102381],[-12.3224297,8.7083586],[-12.3211719,8.7074912],[-12.320543,8.7073177],[-12.3194753,8.7074044],[-12.3185977,8.7079104],[-12.3175154,8.7090092],[-12.3161844,8.7108886],[-12.3147365,8.7125512],[-12.3141953,8.7135198],[-12.3138298,8.7147487],[-12.3140929,8.7159197],[-12.3147365,8.7167293],[-12.3162137,8.7175244],[-12.3177348,8.7177702],[-12.3196654,8.7181027],[-12.3212742,8.7189123],[-12.3229124,8.7200544],[-12.3237021,8.720994],[-12.3241263,8.7220349],[-12.3242726,8.7237842],[-12.3239215,8.7250564],[-12.3231317,8.7267189],[-12.3221664,8.7277742],[-12.3209086,8.728497],[-12.3214706,8.7317507],[-12.3311687,8.7322226],[-12.3373474,8.7351284],[-12.3442736,8.7445845],[-12.3522077,8.7563826],[-12.363573,8.7609241],[-12.3642639,8.7622987],[-12.3709017,8.7727638],[-12.3720556,8.7841439],[-12.3700615,8.7912056],[-12.3659071,8.7918625],[-12.3592696,8.7977265],[-12.3520042,8.7979557],[-12.3504639,8.7968372],[-12.3500081,8.796476],[-12.3495955,8.7958043],[-12.3490729,8.7949772],[-12.3484927,8.7946315],[-12.3474619,8.7945888],[-12.3466289,8.7944685],[-12.3457683,8.7945345],[-12.3446131,8.7946432],[-12.3430728,8.7944801],[-12.3414573,8.7940687],[-12.3399602,8.7938513],[-12.3387776,8.7939445],[-12.3378934,8.7942823],[-12.3370958,8.7947755],[-12.3363924,8.7951444],[-12.3360152,8.7951444],[-12.3357952,8.7953735],[-12.3358227,8.7955987],[-12.3356891,8.7958317],[-12.3352333,8.796053],[-12.3345692,8.7964064],[-12.3344749,8.7969694],[-12.3344099,8.7972653],[-12.3341654,8.7972557],[-12.3339584,8.7973106],[-12.3339167,8.7974712],[-12.3340417,8.7977389],[-12.3340459,8.7978899],[-12.3338181,8.797975],[-12.3335722,8.7979572],[-12.3332613,8.7978083],[-12.3331189,8.7978743],[-12.3329776,8.7980894],[-12.3327081,8.7982789],[-12.3325886,8.7986825],[-12.3324441,8.7990202],[-12.3320663,8.7993717],[-12.3317106,8.7997945],[-12.3251771,8.8037575],[-12.3228563,8.8094286],[-12.3208668,8.8151091],[-12.3208246,8.8152295],[-12.3208866,8.8161423],[-12.320869,8.8169383],[-12.3206056,8.8175945],[-12.3200909,8.8184953],[-12.3192972,8.8194621],[-12.3189946,8.8201416],[-12.3188375,8.8207395],[-12.3189435,8.821357],[-12.3191951,8.8218889],[-12.3194622,8.8224053],[-12.3194111,8.8228557],[-12.3191989,8.8234576],[-12.3191173,8.8240025],[-12.3190653,8.824836],[-12.3188257,8.8257601],[-12.3186725,8.8264046],[-12.3187824,8.8269598],[-12.3189985,8.8275617],[-12.3193836,8.8280936],[-12.3198316,8.8291419],[-12.3200595,8.8298214],[-12.3201538,8.8304815],[-12.3203856,8.8312347],[-12.3205232,8.8324578],[-12.3207078,8.8334789],[-12.3206213,8.8342011],[-12.320421,8.8345855],[-12.3204917,8.8349155],[-12.3208964,8.835529],[-12.3211047,8.8358707],[-12.3211283,8.8366123],[-12.3212107,8.8370627],[-12.321474,8.837447],[-12.321808,8.8375325],[-12.3222402,8.8378664],[-12.3228846,8.8387011],[-12.3234859,8.8394582],[-12.3242913,8.8399242],[-12.3256862,8.8409531],[-12.3259305,8.8419829],[-12.328953,8.8471796],[-12.3293137,8.8481501],[-12.3294304,8.8488584],[-12.329786,8.8493636],[-12.3298416,8.8497314],[-12.3298899,8.850006],[-12.3292857,8.8508901],[-12.3292394,8.8514684],[-12.3296856,8.8518425],[-12.3298585,8.8526159],[-12.3300103,8.853941],[-12.3301008,8.854234],[-12.3300192,8.8544904],[-12.3297523,8.85456],[-12.3295559,8.8546552],[-12.3296708,8.8548603],[-12.3300009,8.8549458],[-12.3305455,8.8549665],[-12.3309106,8.8557567],[-12.3311095,8.8559449],[-12.333717,8.8571847],[-12.3345931,8.8572811],[-12.3348674,8.8576254],[-12.3350601,8.8586765],[-12.3352105,8.8609011],[-12.3357097,8.8612819],[-12.3366606,8.861326],[-12.3371469,8.8616612],[-12.3386629,8.8635693],[-12.3393305,8.8639858],[-12.340468,8.8642322],[-12.3410091,8.8643164],[-12.3415761,8.8648867],[-12.3417652,8.8654737],[-12.341743,8.8659974],[-12.3414984,8.866609],[-12.3411796,8.8678049],[-12.3412502,8.8687831],[-12.3418189,8.8707198],[-12.3424139,8.8726553],[-12.3426363,8.8737466],[-12.3428276,8.8747292],[-12.3440003,8.8769107],[-12.3450202,8.8776782],[-12.3453275,8.8784485],[-12.3443711,8.8812706],[-12.3443005,8.8817594],[-12.3445748,8.8825467],[-12.3447008,8.8834037],[-12.344657,8.8838651],[-12.344434,8.8842752],[-12.3440744,8.8848648],[-12.3449739,8.8861537],[-12.3460608,8.8887078],[-12.3459929,8.890741],[-12.346011,8.8912187],[-12.3467071,8.8916212],[-12.3472828,8.8919641],[-12.3474386,8.8931268],[-12.3477187,8.8939459],[-12.3482799,8.8947066],[-12.348716,8.8953596],[-12.3494013,8.8951118],[-12.3498932,8.8952097],[-12.3502255,8.8958567],[-12.3509922,8.8964311],[-12.3523532,8.8976248],[-12.3526648,8.8983223],[-12.352387,8.8993478],[-12.3526411,8.9004039],[-12.3534145,8.9016837],[-12.3535823,8.9028283],[-12.3540456,8.9035856],[-12.3546255,8.9042112],[-12.3553333,8.9045841],[-12.3562821,8.9053558],[-12.3564608,8.9056766],[-12.3566902,8.9058898],[-12.3577436,8.906282],[-12.3590156,8.9063244],[-12.3632164,8.9074853],[-12.369356,8.9087623],[-12.3711701,8.9086833],[-12.3729399,8.9077755],[-12.3736913,8.9076869],[-12.3745202,8.9080049],[-12.3753276,8.9081825],[-12.3761241,8.9079281],[-12.3768644,8.9073054],[-12.377405,8.9062374],[-12.3793053,8.9053604],[-12.3806141,8.9048887],[-12.381864,8.9045044],[-12.3825426,8.9044779],[-12.3834279,8.9043614],[-12.3839642,8.9041308],[-12.3843183,8.9037466],[-12.3846482,8.9030523],[-12.3849245,8.9026919],[-12.3875646,8.902108],[-12.3897958,8.9034308],[-12.39037,8.9035453],[-12.3912908,8.9048927],[-12.3917843,8.905261],[-12.3921196,8.9056399],[-12.3926077,8.9061831],[-12.393985,8.9080809],[-12.3938189,8.9117747],[-12.3942343,8.9140731],[-12.3964777,8.9162894],[-12.3987017,8.9195252],[-12.3989081,8.9212323],[-12.3980738,8.9229701],[-12.3993344,8.9268282],[-12.3994643,8.9270276],[-12.3997688,8.9272194],[-12.4003819,8.9274242],[-12.4014011,8.9275976],[-12.4017703,8.9275639],[-12.4024461,8.9273719],[-12.4034117,8.9269539],[-12.4037293,8.9267971],[-12.404016,8.9264441],[-12.4040778,8.9262001],[-12.4041219,8.9258036],[-12.4042807,8.9255378],[-12.4046793,8.9253094],[-12.405229,8.925272],[-12.4057494,8.9254245],[-12.4064242,8.9262328],[-12.4068806,8.9266137],[-12.4082936,8.9277924],[-12.4091037,8.9291057],[-12.41008,8.9307268],[-12.4114094,8.9319169],[-12.412635,8.9327377],[-12.4136113,8.9341741],[-12.4153769,8.9346461],[-12.417101,8.9332712],[-12.4190535,8.931527],[-12.4212761,8.9305831],[-12.424018,8.9307473],[-12.4268846,8.9302958],[-12.4295075,8.932066],[-12.4312467,8.9346871],[-12.434634,8.9363189],[-12.4350686,8.9339766],[-12.4353637,8.9330174],[-12.4362542,8.9321854],[-12.4365492,8.931682],[-12.4366145,8.9313424],[-12.4362488,8.9302458],[-12.4356641,8.9292813],[-12.4356641,8.9289369],[-12.4361093,8.9280731],[-12.4362113,8.9274742],[-12.4362381,8.9267005],[-12.4364634,8.9264038],[-12.4378635,8.9254128],[-12.4383195,8.9250524],[-12.4383409,8.9234943],[-12.4398964,8.9191532],[-12.4447571,8.9167728],[-12.44879,8.9127384],[-12.4544202,8.9205257],[-12.465019,8.9365696],[-12.4727027,8.9366275],[-12.490812,8.9507572],[-12.4985795,8.9751709],[-12.5039543,8.9964482],[-12.5056937,9.0077424],[-12.5112182,9.0250805],[-12.5152083,9.0262825],[-12.5226081,9.0241805],[-12.5391679,9.0022304],[-12.5462175,9.0108177],[-12.5451985,9.0245454],[-12.5455621,9.0271194],[-12.550738,9.0279753],[-12.5699904,9.0214808],[-12.583323,9.0183796],[-12.5915558,9.0228078],[-12.5934767,9.0223736],[-12.5978347,9.0223529],[-12.600106,9.0213347],[-12.6033457,9.0211181],[-12.6050055,9.0206836],[-12.6064681,9.0194034],[-12.6080664,9.0168059],[-12.6088453,9.0162143],[-12.6108137,9.0155455],[-12.6124793,9.0160911],[-12.6145879,9.0157761],[-12.6154592,9.0127626],[-12.617647,9.0111088],[-12.6188008,9.0108019],[-12.6206008,9.0104945],[-12.622252,9.0096154],[-12.6242057,9.0093044],[-12.6267272,9.0109727],[-12.627597,9.012862],[-12.6291758,9.013991],[-12.6320602,9.0162053],[-12.633997,9.0172508],[-12.6359354,9.0173371],[-12.6375387,9.016874],[-12.6424118,9.0145003],[-12.6461979,9.0122874],[-12.65007,9.0094686],[-12.6514859,9.0085471],[-12.6526985,9.0072536],[-12.6538921,9.0060212],[-12.6547111,9.0047384],[-12.6556307,9.0035201],[-12.6569837,9.0023415],[-12.6581755,9.0016723],[-12.6594972,9.0014937],[-12.66067,9.0014981],[-12.6616154,9.0020242],[-12.6623834,9.0035823],[-12.6632753,9.0046654],[-12.6651368,9.006073],[-12.6661755,9.007085],[-12.6667936,9.0081823],[-12.6669188,9.0098536],[-12.6665527,9.0121595],[-12.6675337,9.0140597],[-12.6684885,9.0145459],[-12.672823,9.0145371],[-12.6768785,9.0139101],[-12.6794273,9.0130072],[-12.6816585,9.0120038],[-12.6872023,9.0081938],[-12.6885051,9.0062496],[-12.6893788,9.0039023],[-12.6898986,9.0014782],[-12.6911122,8.9993292],[-12.6927315,8.9990748],[-12.6945335,8.9996315],[-12.6961772,9.0013429],[-12.6967847,9.0040548],[-12.6966444,9.0056617],[-12.6953918,9.0077514],[-12.6943618,9.0102946],[-12.6940764,9.0120154],[-12.6950618,9.0131741],[-12.6971084,9.0143636],[-12.7007133,9.016059],[-12.7032234,9.0175168],[-12.7048372,9.0190082],[-12.705171,9.0206427],[-12.7038851,9.0242361],[-12.7029449,9.0260617],[-12.7033636,9.0283472],[-12.7047197,9.029558],[-12.7061651,9.030256],[-12.7093953,9.0305857],[-12.7115279,9.0292829],[-12.7141029,9.0279266],[-12.7153426,9.0269239],[-12.7159732,9.025074],[-12.7156283,9.0232395],[-12.7158664,9.0192408],[-12.7165061,9.0180935],[-12.7177077,9.0169067],[-12.7197677,9.0143636],[-12.7228576,9.0111423],[-12.7256585,9.0088223],[-12.7267362,9.007795],[-12.7281791,9.0070732],[-12.7291125,9.0069393],[-12.7300036,9.0075994],[-12.7308993,9.0088909],[-12.7325531,9.0101908],[-12.7342362,9.0104353],[-12.7354104,9.0113379],[-12.7360432,9.0124888],[-12.7358328,9.0133235],[-12.734855,9.0144446],[-12.7333289,9.0152113],[-12.7310973,9.0158894],[-12.7287667,9.0166441],[-12.7276641,9.0177544],[-12.7277511,9.0196272],[-12.7290374,9.0201279],[-12.7321273,9.0189412],[-12.7352915,9.0193966],[-12.7366648,9.0197357],[-12.7378043,9.0199714],[-12.7394414,9.0200918],[-12.7562268,9.0111256],[-12.75829,9.0078664],[-12.7587996,9.0068812],[-12.7590724,9.0028667],[-12.7530409,8.9957766],[-12.7462949,8.992748],[-12.7440319,8.987781],[-12.7432776,8.9792128],[-12.777954,8.9991347],[-12.8105084,9.0323132],[-12.8326429,9.0281509],[-12.8427726,9.0137],[-12.8471298,9.0144793],[-12.8609969,8.9844344],[-12.8766659,8.951339],[-12.9280297,8.9161207],[-12.9305981,8.9143596],[-12.9133553,8.8960886],[-12.9128016,8.8478719],[-12.9127997,8.8477072],[-12.9127954,8.8473322],[-12.912794,8.847219],[-12.9136139,8.8451751],[-12.9178189,8.8445167],[-12.9218532,8.8438721],[-12.9277883,8.8424992],[-12.9321909,8.8410473],[-12.9379127,8.839678],[-12.9431739,8.8386382],[-12.9535133,8.8359719],[-12.9558995,8.8355062],[-12.9631184,8.8358579],[-12.9651152,8.8366144],[-12.9733044,8.8427772],[-12.9787679,8.8459764],[-12.9858908,8.8489356],[-12.9902009,8.8511749],[-12.9938433,8.8531944],[-12.9971821,8.8553138],[-13.0005571,8.8558961],[-13.0018161,8.8561135],[-13.0087163,8.8558736],[-13.0108623,8.8553919],[-13.0126891,8.8549819],[-13.014083,8.854669],[-13.0160213,8.8542341],[-13.0192353,8.8539171],[-13.0239644,8.853451],[-13.0249594,8.8532671],[-13.0336084,8.8516696],[-13.0419933,8.8500295],[-13.0499275,8.8484321],[-13.0564736,8.8460707],[-13.0639148,8.8451658],[-13.0742448,8.8459011],[-13.0818085,8.8478593],[-13.0895123,8.8471945],[-13.0947207,8.8457524],[-13.1030769,8.8467986],[-13.1067832,8.8473218],[-13.1126923,8.8481559],[-13.1196749,8.8480428],[-13.1222114,8.8480409],[-13.1244459,8.8479922],[-13.1283405,8.8486163],[-13.129845,8.8489216],[-13.1344271,8.8498516],[-13.1372875,8.8504321],[-13.1473686,8.8540798],[-13.1531191,8.8564357],[-13.1585042,8.8588457],[-13.1633807,8.8609239],[-13.165188,8.861837],[-13.179927,8.8702303],[-13.1871631,8.8743509],[-13.4739868,8.874],[-13.4724452,8.871],[-13.4703136,8.867],[-13.4680973,8.863],[-13.4657588,8.859],[-13.463293,8.855],[-13.4606945,8.851],[-13.4579569,8.847],[-13.4550733,8.843],[-13.4520359,8.839],[-13.4496515,8.836],[-13.4494782,8.834],[-13.4504477,8.824],[-13.4507511,8.82],[-13.450993,8.816],[-13.4511539,8.812],[-13.4512338,8.808],[-13.4512532,8.802],[-13.4511913,8.798],[-13.4509466,8.792],[-13.4505189,8.786],[-13.4499071,8.78],[-13.4491094,8.774],[-13.4489848,8.768],[-13.448842,8.764],[-13.4483758,8.756],[-13.4481002,8.75],[-13.447642,8.744],[-13.4469994,8.738],[-13.4468505,8.736],[-13.4470317,8.732],[-13.4471318,8.728],[-13.4471509,8.724],[-13.4470892,8.72],[-13.4469463,8.716],[-13.4467224,8.712],[-13.4464169,8.708],[-13.4458529,8.702],[-13.4458348,8.7],[-13.446351,8.694],[-13.4466838,8.688],[-13.4468339,8.682],[-13.446845,8.678],[-13.4467832,8.674],[-13.4466405,8.67],[-13.4460915,8.66],[-13.4457657,8.656],[-13.445358,8.652],[-13.4446983,8.644],[-13.444025,8.638],[-13.444146,8.636],[-13.4469398,8.633],[-13.4504928,8.629],[-13.4538612,8.625],[-13.4570569,8.621],[-13.4600898,8.617],[-13.4629689,8.613],[-13.4657022,8.609],[-13.4682964,8.605],[-13.468924,8.604],[-13.4719407,8.599],[-13.4747627,8.594],[-13.4773991,8.589],[-13.4798579,8.584],[-13.4817019,8.58],[-13.4842703,8.574]]]]}]}
