# Supplementary material
Source: ML conference proceedings conference paper supplement (https://proceedings.neurips.cc/paper_files/paper/2022/hash/9d3faa41886997cfc2128b930077fa49-Abstract.html)
Supplement: Supplementary file 1 [file 9d3faa41886997cfc2128b930077fa49-Supplemental-Conference.zip › code/ebola/map/geojson/pujehun.geojson]

{"type":"GeometryCollection","geometries":[{"type":"MultiPolygon","coordinates":[[[[-11.960198,7.1917972],[-11.9590795,7.1913368],[-11.9543642,7.1893516],[-11.9476855,7.1863978],[-11.9407064,7.1835663],[-11.9300553,7.1792525],[-11.9214468,7.1756213],[-11.9173872,7.1738556],[-11.9138119,7.1723068],[-11.9108909,7.1709948],[-11.906814,7.1691],[-11.9028926,7.1672052],[-11.8982363,7.1650017],[-11.8952537,7.1636498],[-11.8923515,7.1623617],[-11.8892723,7.1609885],[-11.8859464,7.159421],[-11.881046,7.1569939],[-11.8767867,7.1550059],[-11.8745847,7.153968],[-11.8719615,7.1527225],[-11.8666774,7.1502208],[-11.8557757,7.1448978],[-11.8533307,7.1437377],[-11.8517752,7.1429127],[-11.8506163,7.1423751],[-11.8484814,7.1415447],[-11.8449408,7.1401182],[-11.8394638,7.1376111],[-11.830312,7.1333156],[-11.8231431,7.1297711],[-11.8174267,7.1267205],[-11.8056148,7.1209957],[-11.7942418,7.1153185],[-11.7908138,7.1135512],[-11.7874719,7.1117999],[-11.7810116,7.1083199],[-11.7735717,7.1044381],[-11.7626345,7.0989071],[-11.7579782,7.0964317],[-11.7552907,7.0949306],[-11.7516966,7.0929822],[-11.7463481,7.0900277],[-11.7419441,7.0876109],[-11.7382251,7.0855304],[-11.7305876,7.0811376],[-11.7252553,7.078034],[-11.7167742,7.0730298],[-11.7116886,7.0699474],[-11.7051786,7.0660872],[-11.6985003,7.0620791],[-11.6964108,7.0608546],[-11.6896436,7.0568777],[-11.685505,7.0544713],[-11.6809935,7.0518174],[-11.6805939,7.0515805],[-11.680272,7.0514101],[-11.6798804,7.0511971],[-11.6793896,7.0509097],[-11.6791938,7.0507952],[-11.679006,7.050686],[-11.6789014,7.0505902],[-11.6787968,7.0504997],[-11.6786305,7.0503986],[-11.6783757,7.0502947],[-11.6780485,7.050151],[-11.6758034,7.0488361],[-11.6752214,7.0484713],[-11.6750229,7.0483462],[-11.674811,7.0482184],[-11.6744248,7.0480427],[-11.6742692,7.0479656],[-11.6741432,7.0478857],[-11.6740359,7.0477792],[-11.6739501,7.0476967],[-11.6737623,7.0476408],[-11.6736416,7.0475902],[-11.6734968,7.0474837],[-11.67325,7.0472814],[-11.6730381,7.0471537],[-11.6727994,7.0470552],[-11.6726009,7.046962],[-11.6723434,7.0468183],[-11.6722066,7.0467224],[-11.6720376,7.046608],[-11.671748,7.0464429],[-11.6715441,7.0463498],[-11.6713134,7.0462539],[-11.6711659,7.0461608],[-11.6709862,7.0460543],[-11.6705141,7.0457641],[-11.6699992,7.0455112],[-11.6694143,7.0451759],[-11.6691435,7.0449948],[-11.6689156,7.0447952],[-11.6686473,7.0446008],[-11.6683791,7.0444465],[-11.6680546,7.0443107],[-11.6677434,7.0441616],[-11.6670541,7.0437543],[-11.666582,7.0434482],[-11.6662628,7.0432299],[-11.6660697,7.0431101],[-11.665831,7.0429904],[-11.6656138,7.0429078],[-11.6653509,7.0427668],[-11.6648896,7.0424793],[-11.6637603,7.041843],[-11.6635243,7.0416887],[-11.6632561,7.0414358],[-11.6630898,7.0413107],[-11.6628082,7.0411483],[-11.6624192,7.040906],[-11.6621296,7.0407756],[-11.6619391,7.0406877],[-11.6618104,7.0405972],[-11.6616334,7.0404588],[-11.6613834,7.040338],[-11.6611371,7.0402272],[-11.6610379,7.0401633],[-11.6609145,7.0400435],[-11.6607724,7.0399051],[-11.6606034,7.0398066],[-11.6604693,7.0397294],[-11.6602359,7.0396389],[-11.6599623,7.0394925],[-11.6598121,7.039394],[-11.6596137,7.0392556],[-11.6593374,7.0390746],[-11.6590423,7.0388669],[-11.6588573,7.0387578],[-11.6587258,7.0386646],[-11.6586212,7.0385395],[-11.6584657,7.0383931],[-11.6582618,7.0382494],[-11.657846,7.0380205],[-11.6573686,7.0377196],[-11.6569045,7.0373817],[-11.656792,7.037299],[-11.6566176,7.0372059],[-11.6564245,7.037118],[-11.6560383,7.0368944],[-11.655373,7.0364446],[-11.6546703,7.0359707],[-11.6536966,7.0351828],[-11.6516824,7.0335003],[-11.6503572,7.0323584],[-11.6492066,7.0313948],[-11.6478628,7.0301303],[-11.6469294,7.0292146],[-11.6459745,7.0282722],[-11.6449392,7.02725],[-11.6434157,7.0259615],[-11.6420318,7.024838],[-11.6407603,7.0237786],[-11.6395802,7.0227456],[-11.6382659,7.0216277],[-11.637059,7.0205361],[-11.6359538,7.0196577],[-11.6346556,7.0185556],[-11.6331697,7.0173736],[-11.6317965,7.0163992],[-11.6300556,7.0152333],[-11.6286421,7.0143281],[-11.6282371,7.01403],[-11.6279662,7.0138117],[-11.6277651,7.0135933],[-11.6276819,7.0134443],[-11.627529,7.0131355],[-11.6273761,7.0128267],[-11.6272128,7.0125346],[-11.6261852,7.010697],[-11.6255307,7.0095576],[-11.625166,7.0089932],[-11.6249192,7.008546],[-11.6247636,7.0082691],[-11.6246456,7.0079975],[-11.6245812,7.0077367],[-11.6245437,7.0074811],[-11.6245437,7.0072308],[-11.6245705,7.0069806],[-11.624608,7.0067357],[-11.6246563,7.0064482],[-11.6246992,7.0061074],[-11.6246992,7.005921],[-11.6246885,7.0057081],[-11.6246724,7.0055031],[-11.6246563,7.0053513],[-11.6246349,7.0051517],[-11.624608,7.004952],[-11.6245893,7.0047896],[-11.6245732,7.0046485],[-11.6245544,7.0045553],[-11.624545,7.0044156],[-11.6245356,7.0043237],[-11.6245329,7.0042226],[-11.6245276,7.0041321],[-11.6245222,7.0040562],[-11.6245222,7.0039883],[-11.6245236,7.0039244],[-11.6245236,7.0038153],[-11.6245169,7.0036103],[-11.6245169,7.0034292],[-11.6245115,7.0032056],[-11.6245008,7.0029607],[-11.6244793,7.0026865],[-11.6244632,7.0024549],[-11.624431,7.0021993],[-11.6244069,7.0019144],[-11.6243398,7.0016456],[-11.6242647,7.0013394],[-11.6242004,7.0011131],[-11.624136,7.0008442],[-11.6240823,7.0006579],[-11.6240287,7.0004689],[-11.6239697,7.0003038],[-11.6239214,7.0001494],[-11.6238785,7.0000003],[-11.6238195,6.9997927],[-11.6237739,6.9996462],[-11.6237336,6.9995211],[-11.62368,6.999372],[-11.6235352,6.9991005],[-11.6234306,6.9988982],[-11.6233796,6.9987757],[-11.623334,6.9986719],[-11.6232938,6.9985254],[-11.6232455,6.9983604],[-11.6232079,6.9982166],[-11.6231436,6.9980516],[-11.6230524,6.9978865],[-11.6229612,6.9977587],[-11.6228619,6.9976469],[-11.6227707,6.9975537],[-11.6226876,6.9974872],[-11.6225857,6.997402],[-11.6224945,6.9973381],[-11.6223872,6.9972582],[-11.6223228,6.9972103],[-11.6222236,6.9971411],[-11.6221565,6.9970878],[-11.6220385,6.9969814],[-11.6219795,6.9969175],[-11.6219339,6.9968536],[-11.6219037,6.996807],[-11.6218802,6.9967677],[-11.6218387,6.9967078],[-11.6217957,6.9966486],[-11.6217434,6.9965953],[-11.6217087,6.9965526],[-11.6216603,6.9965021],[-11.6216093,6.9964489],[-11.6215503,6.9963957],[-11.6214994,6.9963504],[-11.6214538,6.9963051],[-11.6213733,6.9962279],[-11.6212848,6.9961481],[-11.6211534,6.9959937],[-11.6211011,6.9959218],[-11.621038,6.9958419],[-11.6210032,6.9957993],[-11.6209555,6.9957361],[-11.6209187,6.9956842],[-11.6208878,6.9956369],[-11.6208489,6.995583],[-11.6208087,6.9955331],[-11.6207624,6.9954845],[-11.6207188,6.9954372],[-11.6206759,6.9953933],[-11.6206276,6.9953414],[-11.6205847,6.9952948],[-11.6205432,6.9952536],[-11.6205083,6.9952196],[-11.6204567,6.9951744],[-11.6204191,6.9951411],[-11.6203889,6.9951131],[-11.6203527,6.9950739],[-11.6203098,6.9950286],[-11.6202722,6.994986],[-11.6202488,6.9949474],[-11.6202334,6.9948995],[-11.6202213,6.9948555],[-11.6202119,6.9948076],[-11.6201945,6.9947491],[-11.6201904,6.9946852],[-11.6201878,6.9946146],[-11.6201958,6.9945507],[-11.6202065,6.9944762],[-11.6202146,6.9944269],[-11.6202293,6.9943284],[-11.6202441,6.9942645],[-11.6202642,6.994194],[-11.6202783,6.9941361],[-11.6202984,6.9940755],[-11.6203138,6.9940243],[-11.6203413,6.9939517],[-11.6203748,6.9938718],[-11.6203997,6.993808],[-11.6204184,6.99376],[-11.6204325,6.9937141],[-11.6204499,6.9936549],[-11.6204654,6.9935956],[-11.6204801,6.9935391],[-11.6204949,6.9934778],[-11.6205029,6.9934086],[-11.6205016,6.9933434],[-11.6204989,6.9932822],[-11.6204949,6.9932209],[-11.6204949,6.9931644],[-11.6204935,6.9931351],[-11.6204908,6.9931124],[-11.6204888,6.9930931],[-11.6204862,6.9930685],[-11.6204841,6.9930392],[-11.6204821,6.9930066],[-11.6204788,6.9929534],[-11.6204748,6.9928802],[-11.620464,6.9928149],[-11.6204426,6.9927058],[-11.6203943,6.992602],[-11.6203299,6.9925114],[-11.6202495,6.9924076],[-11.6201529,6.9923277],[-11.6200268,6.9922399],[-11.6198927,6.9921733],[-11.6197827,6.9921174],[-11.619654,6.9920322],[-11.6194689,6.9918991],[-11.6192758,6.9917793],[-11.6188869,6.9915051],[-11.6182995,6.9910712],[-11.6175538,6.9906079],[-11.6171676,6.990331],[-11.6166633,6.989985],[-11.6162288,6.9896708],[-11.6157246,6.9892502],[-11.6153705,6.9889307],[-11.6149843,6.9884089],[-11.6146302,6.9878338],[-11.6141957,6.9874025],[-11.6136432,6.9869712],[-11.6130638,6.9865559],[-11.6125596,6.9861193],[-11.6120231,6.985704],[-11.6117872,6.9853418],[-11.6117228,6.9849531],[-11.6117604,6.9843621],[-11.6117228,6.9840905],[-11.6115242,6.9838777],[-11.61102,6.9836966],[-11.6101456,6.9833665],[-11.6095877,6.9831588],[-11.6087079,6.9826317],[-11.6075814,6.9819821],[-11.6068626,6.9816147],[-11.6057414,6.981242],[-11.6044834,6.9809544],[-11.6036385,6.9806962],[-11.6027642,6.9805604],[-11.6022277,6.9805497],[-11.6018736,6.9803952],[-11.6016162,6.980012],[-11.6014124,6.9798735],[-11.6011925,6.9798416],[-11.6009081,6.9798096],[-11.6006185,6.9796552],[-11.6002456,6.9794076],[-11.5999479,6.9791866],[-11.5997065,6.9791547],[-11.5995751,6.97916],[-11.5994007,6.9791467],[-11.5992237,6.9791467],[-11.5990413,6.9791494],[-11.5988563,6.9791281],[-11.5986846,6.9790242],[-11.5984673,6.9788219],[-11.5982286,6.9787127],[-11.5979094,6.9786196],[-11.5976841,6.9785211],[-11.5974266,6.9784172],[-11.5972255,6.97838],[-11.597035,6.9783773],[-11.5968768,6.9784013],[-11.5967493,6.9785131],[-11.5966394,6.9786595],[-11.5965777,6.9787806],[-11.5965509,6.9788964],[-11.5965522,6.9790921],[-11.5966609,6.9793224],[-11.5967494,6.9794422],[-11.5968486,6.9794901],[-11.5969559,6.9795035],[-11.5971155,6.9794875],[-11.597318,6.9794462],[-11.5974588,6.9794249],[-11.5976332,6.9794276],[-11.5977914,6.9794715],[-11.5980355,6.9795381],[-11.5982615,6.9796571],[-11.5987034,6.9798709],[-11.5988697,6.9799774],[-11.5989957,6.9802383],[-11.5991191,6.9807574],[-11.5991003,6.9809598],[-11.5989394,6.9811408],[-11.5986551,6.9812473],[-11.5982742,6.981242],[-11.5981079,6.9811621],[-11.5980328,6.9810343],[-11.5979416,6.9808479],[-11.5978236,6.9807095],[-11.5977485,6.9805205],[-11.5977592,6.9803474],[-11.5978424,6.9802649],[-11.5979068,6.9801531],[-11.5978907,6.9800546],[-11.5977351,6.9798735],[-11.5975688,6.9797457],[-11.5974535,6.9796792],[-11.5973703,6.9797191],[-11.597373,6.9797937],[-11.5974642,6.9798549],[-11.5974481,6.9799108],[-11.5973596,6.9799561],[-11.5970799,6.9800716],[-11.5967801,6.980225],[-11.5963779,6.9806216],[-11.5960291,6.9810396],[-11.5958816,6.9812446],[-11.5958039,6.9814656],[-11.5957073,6.9816626],[-11.5953988,6.982046],[-11.5951332,6.9823175],[-11.5948061,6.9825598],[-11.5946128,6.9826634],[-11.5941704,6.9827808],[-11.5937386,6.9829485],[-11.5934248,6.9830869],[-11.5926443,6.9836673],[-11.5922928,6.984064],[-11.5921373,6.9842637],[-11.5920783,6.9844101],[-11.5919844,6.9845219],[-11.5917752,6.9846311],[-11.5913166,6.9848201],[-11.5912173,6.9849692],[-11.5912039,6.9850544],[-11.5911825,6.9851422],[-11.5911342,6.9851742],[-11.5910349,6.9851609],[-11.5909518,6.9851103],[-11.5908847,6.9850943],[-11.5907662,6.985107],[-11.5906862,6.9852061],[-11.5906111,6.9853499],[-11.5905039,6.9854591],[-11.5903161,6.9856055],[-11.5899594,6.9859436],[-11.5893166,6.9866734],[-11.5890635,6.9870511],[-11.5888167,6.987541],[-11.5886478,6.9877167],[-11.5883848,6.9878312],[-11.5871215,6.9880149],[-11.5861988,6.9881693],[-11.5853673,6.9884728],[-11.5848363,6.9886219],[-11.584395,6.9886459],[-11.5840238,6.9885948],[-11.5830928,6.9888189],[-11.5825832,6.9889946],[-11.582256,6.9892448],[-11.5818322,6.9896761],[-11.5814781,6.9900701],[-11.5813547,6.9903417],[-11.5813386,6.9904855],[-11.5814567,6.9907304],[-11.5814943,6.9910126],[-11.5814138,6.9913853],[-11.5811563,6.9917367],[-11.5805072,6.9921733],[-11.5799332,6.9924928],[-11.5789622,6.993185],[-11.5778089,6.993776],[-11.5763658,6.994383],[-11.575942,6.994596],[-11.5753895,6.9949155],[-11.5752179,6.9950699],[-11.5750785,6.9951764],[-11.5749444,6.9951977],[-11.574499,6.9951817],[-11.5738881,6.9951514],[-11.5721249,6.9954606],[-11.5712211,6.9955907],[-11.5704965,6.9957429],[-11.5697515,6.9957833],[-11.569178,6.9958409],[-11.5682908,6.9959785],[-11.5672969,6.9961723],[-11.566565,6.996401],[-11.5657979,6.9966512],[-11.5649965,6.9968976],[-11.5641659,6.9972466],[-11.5635258,6.997574],[-11.56306,6.997893],[-11.5604829,6.9966405],[-11.557349,6.9949153],[-11.5577626,6.9945869],[-11.558143,6.994314],[-11.5586891,6.9939005],[-11.5599,6.9932897],[-11.5605982,6.9929416],[-11.5611507,6.9926657],[-11.561657,6.9924916],[-11.5625999,6.9923439],[-11.5632914,6.9921041],[-11.5638605,6.9919136],[-11.5645421,6.9916017],[-11.5650252,6.9913094],[-11.56572,6.9910138],[-11.5662494,6.990577],[-11.5669376,6.9902519],[-11.5674108,6.9898447],[-11.5674825,6.9895217],[-11.5675789,6.9893034],[-11.5677614,6.9892076],[-11.5681455,6.9890625],[-11.5687913,6.9888295],[-11.5690542,6.9886858],[-11.569242,6.9884515],[-11.5693485,6.9879661],[-11.5695312,6.9871483],[-11.5700412,6.9856082],[-11.5702746,6.9847882],[-11.5703578,6.9845379],[-11.5704463,6.9843835],[-11.5705855,6.9842595],[-11.5708065,6.983908],[-11.5709023,6.9835182],[-11.5709237,6.9831402],[-11.5709344,6.9822989],[-11.5709425,6.9819847],[-11.5709747,6.9818064],[-11.5709988,6.9814869],[-11.5710202,6.9811781],[-11.5710525,6.9809651],[-11.5714037,6.9803022],[-11.5715513,6.9799188],[-11.5716694,6.9794742],[-11.5717069,6.9790908],[-11.571706,6.9788536],[-11.5716944,6.9782272],[-11.5717176,6.9780418],[-11.572097,6.976853],[-11.5722513,6.9763512],[-11.5723533,6.976069],[-11.5724793,6.9758587],[-11.572702,6.9756164],[-11.572938,6.9752597],[-11.573233,6.9748603],[-11.5734268,6.9746007],[-11.5735498,6.974386],[-11.5736863,6.9741042],[-11.5739357,6.9735771],[-11.5742442,6.9729807],[-11.5746332,6.9724988],[-11.5749928,6.9721448],[-11.5753572,6.9717873],[-11.5756819,6.9715031],[-11.5761539,6.9710851],[-11.5764436,6.9707896],[-11.5767252,6.9705152],[-11.5778115,6.9695675],[-11.5780141,6.9694252],[-11.5784338,6.9690963],[-11.5792361,6.9685476],[-11.579397,6.968442],[-11.5797696,6.9682869],[-11.5802544,6.9681005],[-11.58043,6.9679814],[-11.5806386,6.9678303],[-11.5808679,6.9677464],[-11.5809673,6.9677624],[-11.5810154,6.9677984],[-11.5810678,6.967841],[-11.5811188,6.9678756],[-11.5811631,6.9678889],[-11.5812355,6.9679062],[-11.5812905,6.9679142],[-11.5813656,6.9679275],[-11.5815305,6.9679941],[-11.581682,6.9680912],[-11.5818564,6.968203],[-11.5820053,6.9683069],[-11.582079,6.9683375],[-11.5822266,6.9683641],[-11.5823499,6.9684041],[-11.5825872,6.9684813],[-11.5828649,6.9685971],[-11.5832564,6.9686916],[-11.5835378,6.9687851],[-11.5839879,6.9689641],[-11.5845663,6.9692219],[-11.5853941,6.9696527],[-11.5858528,6.969903],[-11.5862499,6.970124],[-11.586587,6.9703089],[-11.5871561,6.970547],[-11.5881623,6.970944],[-11.5891815,6.971338],[-11.589447,6.9714605],[-11.5902543,6.9719504],[-11.5911333,6.9724579],[-11.5919013,6.9728103],[-11.5928356,6.9731751],[-11.5943259,6.9737927],[-11.5959729,6.974445],[-11.5964851,6.974634],[-11.5971638,6.9749588],[-11.5975151,6.9749668],[-11.5976787,6.9749667],[-11.5980194,6.975068],[-11.5983735,6.9752091],[-11.5989903,6.975414],[-11.5993806,6.9755752],[-11.5996903,6.975671],[-11.5999626,6.9757296],[-11.6001316,6.9757482],[-11.600361,6.9757961],[-11.6005997,6.9758214],[-11.6009269,6.975888],[-11.6012621,6.9759679],[-11.6017905,6.9761942],[-11.602276,6.9764816],[-11.6027374,6.9767373],[-11.6031236,6.9769955],[-11.6033999,6.9772911],[-11.6035662,6.9774508],[-11.6038666,6.9776931],[-11.6041027,6.9778714],[-11.6044192,6.9780764],[-11.60458,6.9781483],[-11.6047169,6.9780738],[-11.6047652,6.9778713],[-11.6047652,6.9776318],[-11.6043736,6.9772431],[-11.6035367,6.9766095],[-11.6024637,6.9761248],[-11.6016591,6.9757682],[-11.6011173,6.9755552],[-11.6005379,6.9753049],[-11.5998459,6.9749695],[-11.5991539,6.9746394],[-11.5986496,6.974437],[-11.5980005,6.9741388],[-11.5968633,6.973633],[-11.5958172,6.973223],[-11.5944654,6.9726479],[-11.5925288,6.9718385],[-11.5909249,6.9711783],[-11.5899111,6.9707736],[-11.5889026,6.9704222],[-11.5876901,6.9699376],[-11.5867299,6.9695276],[-11.585523,6.9690164],[-11.5845841,6.9686011],[-11.5832216,6.9680313],[-11.5816498,6.9672859],[-11.5796918,6.9664019],[-11.5772134,6.9653636],[-11.5743167,6.9640058],[-11.5719885,6.9629514],[-11.568373,6.9612368],[-11.566388,6.9602464],[-11.5631318,6.9587022],[-11.5601493,6.9572698],[-11.5583683,6.9564072],[-11.5567052,6.9556084],[-11.5539212,6.9541334],[-11.5512282,6.9527862],[-11.5493989,6.9518277],[-11.5467811,6.9504805],[-11.5452468,6.9497083],[-11.5437716,6.9489841],[-11.5418673,6.9481108],[-11.5392602,6.9467902],[-11.5357466,6.9450969],[-11.5336007,6.944133],[-11.5318681,6.943313],[-11.5299529,6.9423545],[-11.5290999,6.9417634],[-11.5272869,6.9403043],[-11.5251973,6.9383899],[-11.5250793,6.9383047],[-11.5249828,6.9382009],[-11.5248755,6.938109],[-11.5247655,6.9380118],[-11.5246328,6.9379027],[-11.5244209,6.9377096],[-11.5242707,6.9375712],[-11.5239179,6.9372796],[-11.5235211,6.9369708],[-11.5229309,6.9365661],[-11.5221477,6.9360548],[-11.5207529,6.9351389],[-11.5195084,6.9344466],[-11.5177059,6.9334668],[-11.5159249,6.9325083],[-11.5135968,6.9313633],[-11.5120894,6.9306285],[-11.5097934,6.9295315],[-11.5081949,6.9287593],[-11.5067465,6.9283732],[-11.5062101,6.9292226],[-11.5059227,6.9291453],[-11.5057165,6.9290629],[-11.5049173,6.9287858],[-11.50459,6.9285144],[-11.5040213,6.928035],[-11.5036082,6.9275664],[-11.5032703,6.9272575],[-11.5023744,6.9267569],[-11.5015483,6.9262404],[-11.5011446,6.9259568],[-11.5010695,6.9258956],[-11.5009756,6.9258383],[-11.5009099,6.9258223],[-11.5008576,6.9258316],[-11.5008241,6.9258676],[-11.5007503,6.9259142],[-11.5007021,6.9259208],[-11.5006498,6.9259182],[-11.5005465,6.9258556],[-11.4993462,6.9251167],[-11.4986596,6.924752],[-11.4981151,6.9244963],[-11.4978737,6.9243845],[-11.497415,6.9241715],[-11.4969617,6.9239532],[-11.496377,6.9236896],[-11.4959291,6.9234872],[-11.4952612,6.923157],[-11.4947222,6.9228722],[-11.4942232,6.9226005],[-11.4938745,6.9224328],[-11.4934199,6.9221479],[-11.493106,6.9219455],[-11.4930578,6.9218803],[-11.4930229,6.921823],[-11.4929773,6.9217778],[-11.4929304,6.9217578],[-11.4928566,6.9217458],[-11.4927734,6.9217112],[-11.4926502,6.9216487],[-11.492384,6.9215891],[-11.491765,6.9217398],[-11.491156,6.921936],[-11.490224,6.9222999],[-11.4895428,6.9225709],[-11.4885148,6.9230258],[-11.4877393,6.9233068],[-11.4869042,6.9235969],[-11.4862292,6.9236985],[-11.4851032,6.9240631],[-11.4846523,6.9241122],[-11.4839597,6.9240437],[-11.4830524,6.9240086],[-11.4810813,6.9240376],[-11.4804729,6.9240142],[-11.4801426,6.9239383],[-11.479922,6.9238989],[-11.479664,6.9239009],[-11.4791349,6.9237903],[-11.478586,6.9237853],[-11.4778089,6.9238668],[-11.477087,6.9239139],[-11.476057,6.9241769],[-11.475026,6.924183],[-11.474254,6.924444],[-11.473224,6.924707],[-11.4722473,6.9253007],[-11.4711924,6.9255981],[-11.4701256,6.925848],[-11.469623,6.926014],[-11.468497,6.9262137],[-11.4676579,6.9263327],[-11.4666749,6.9264041],[-11.4658598,6.9263446],[-11.4651166,6.9261304],[-11.4646131,6.9257734],[-11.4642477,6.9256434],[-11.4640117,6.9253052],[-11.463689,6.925014],[-11.4634166,6.9246819],[-11.4630587,6.9242959],[-11.4626611,6.9240635],[-11.462394,6.923862],[-11.461878,6.923736],[-11.4613912,6.9234482],[-11.4602414,6.9235205],[-11.4596454,6.9235524],[-11.4589467,6.9236896],[-11.4585828,6.9238992],[-11.458271,6.924012],[-11.457757,6.924272],[-11.4573828,6.9244536],[-11.4569631,6.9246553],[-11.4560504,6.9252037],[-11.4557302,6.9254204],[-11.4552426,6.9256444],[-11.4548492,6.9259887],[-11.454545,6.926221],[-11.4542539,6.92677],[-11.4540815,6.9271954],[-11.4538253,6.9272349],[-11.4539225,6.9274498],[-11.454039,6.928027],[-11.453995,6.9284744],[-11.4541916,6.9295363],[-11.4541654,6.9300289],[-11.4542006,6.9305596],[-11.4540831,6.9312005],[-11.4539083,6.9317495],[-11.4536463,6.9321107],[-11.453417,6.932409],[-11.4531936,6.9328618],[-11.4530499,6.9330879],[-11.452846,6.933314],[-11.4525823,6.9336234],[-11.4522706,6.9338971],[-11.4519829,6.9343016],[-11.4517072,6.9345515],[-11.451367,6.934866],[-11.4502906,6.9357827],[-11.449919,6.9361753],[-11.4497152,6.9363776],[-11.4494515,6.9366275],[-11.449058,6.936939],[-11.448544,6.937199],[-11.447771,6.937203],[-11.4469222,6.9373653],[-11.445453,6.93773],[-11.4450762,6.9378175],[-11.4440693,6.938115],[-11.4425469,6.9387694],[-11.442109,6.939035],[-11.441081,6.939555],[-11.4407608,6.9397095],[-11.440567,6.939816],[-11.4401614,6.9401141],[-11.439925,6.940206],[-11.43954,6.940594],[-11.4387231,6.9410779],[-11.4379798,6.9413754],[-11.4374165,6.9416134],[-11.436865,6.9416372],[-11.4362657,6.9417562],[-11.435163,6.941646],[-11.4345394,6.9415777],[-11.433614,6.941139],[-11.4329452,6.9408875],[-11.431294,6.941151],[-11.429749,6.941417],[-11.4285699,6.9415658],[-11.427429,6.941429],[-11.4268677,6.9413635],[-11.4261364,6.9410898],[-11.425622,6.940923],[-11.425362,6.940667],[-11.424638,6.9403639],[-11.424071,6.940158],[-11.423942,6.94003],[-11.4235713,6.9396976],[-11.4232835,6.9393525],[-11.4231037,6.9390788],[-11.4229119,6.9387932],[-11.4225763,6.9383886],[-11.4221687,6.9380912],[-11.421054,6.9381269],[-11.4206823,6.9382339],[-11.4201069,6.9381388],[-11.4197233,6.937996],[-11.4189561,6.937996],[-11.4183807,6.9380317],[-11.4180931,6.9381626],[-11.4180571,6.9384719],[-11.41775,6.939031],[-11.4175236,6.9393378],[-11.4174938,6.9409351],[-11.4174458,6.9416729],[-11.417637,6.942123],[-11.4178413,6.9424225],[-11.418033,6.943924],[-11.418297,6.945211],[-11.418558,6.945725],[-11.418817,6.945981],[-11.41908,6.94701],[-11.4191239,6.9474321],[-11.4193996,6.9482412],[-11.419605,6.94881],[-11.4196394,6.9490504],[-11.4199272,6.9495264],[-11.420107,6.9497881],[-11.4202387,6.9501808],[-11.420646,6.950866],[-11.4206822,6.9511089],[-11.421167,6.951893],[-11.421427,6.952407],[-11.421821,6.9530723],[-11.422207,6.953691],[-11.422468,6.954205],[-11.422792,6.9551903],[-11.4230557,6.9555116],[-11.4231037,6.9558447],[-11.4233194,6.9562969],[-11.423512,6.956775],[-11.423739,6.9569513],[-11.4240267,6.9572488],[-11.424291,6.957802],[-11.4249497,6.9586767],[-11.4257528,6.9596286],[-11.4266159,6.9607709],[-11.4280654,6.9622678],[-11.4285359,6.9626284],[-11.4288323,6.9630167],[-11.42908,6.9632654],[-11.4292651,6.9634957],[-11.4304112,6.9647523],[-11.4308311,6.9654707],[-11.4310707,6.9660151],[-11.43145,6.9666088],[-11.4316223,6.9670532],[-11.432076,6.967807],[-11.4322343,6.9686135],[-11.432173,6.9693731],[-11.431627,6.9706529],[-11.4313771,6.971023],[-11.4311298,6.9712389],[-11.4307953,6.9714374],[-11.430419,6.971551],[-11.429388,6.971556],[-11.428871,6.971301],[-11.427839,6.971049],[-11.4265621,6.9705103],[-11.4254023,6.9700344],[-11.4247013,6.9696861],[-11.424018,6.969438],[-11.4234276,6.9694551],[-11.422962,6.9693874],[-11.4207935,6.9696707],[-11.420098,6.9698],[-11.419069,6.970063],[-11.418554,6.970324],[-11.4177577,6.9704607],[-11.416495,6.970849],[-11.4155262,6.9713828],[-11.415285,6.9717025],[-11.4152747,6.971939],[-11.4149152,6.9722713],[-11.4146604,6.9723831],[-11.4144739,6.972943],[-11.4143923,6.9737279],[-11.4144444,6.9743587],[-11.4146014,6.9751712],[-11.4147953,6.9757685],[-11.4148387,6.9764763],[-11.414954,6.9770986],[-11.4153329,6.9785939],[-11.4155309,6.9792093],[-11.4155248,6.9796622],[-11.415642,6.980514],[-11.415904,6.981285],[-11.415917,6.983861],[-11.4154952,6.985274],[-11.415328,6.9856875],[-11.4148597,6.9864241],[-11.413875,6.987735],[-11.41362,6.988252],[-11.412722,6.989157],[-11.411949,6.989419],[-11.411693,6.989678],[-11.411178,6.98981],[-11.408859,6.98995],[-11.4086,6.989823],[-11.4081671,6.9896311],[-11.4068148,6.9893722],[-11.4048525,6.988723],[-11.4035443,6.9879539],[-11.401884,6.9870051],[-11.4009683,6.9864557],[-11.3999217,6.9864957],[-11.3982714,6.9871149],[-11.3973758,6.9881936],[-11.3966513,6.99125],[-11.3959268,6.9974924],[-11.3960475,7.001128],[-11.3928073,7.006042],[-11.3876954,7.009238],[-11.3841533,7.0109359],[-11.3822816,7.0103367],[-11.3807722,7.0094378],[-11.3790414,7.0094578],[-11.3762841,7.0127936],[-11.3737233,7.0169709],[-11.3716979,7.0195667],[-11.3705966,7.0207377],[-11.3699084,7.0212061],[-11.3692201,7.0223771],[-11.3699084,7.0303596],[-11.3698691,7.0338531],[-11.3688072,7.0404106],[-11.3685319,7.0441382],[-11.3685319,7.045719],[-11.367057,7.0472023],[-11.3659951,7.0478268],[-11.3647366,7.0479829],[-11.363714,7.0482757],[-11.3632617,7.0491344],[-11.3633601,7.0521593],[-11.3635764,7.0530961],[-11.3646579,7.0544427],[-11.373153,7.0627954],[-11.3736053,7.0630881],[-11.3747262,7.0633028],[-11.3754145,7.0635955],[-11.3758471,7.0645322],[-11.3754145,7.0675571],[-11.3745886,7.0714211],[-11.3727008,7.0742703],[-11.3709309,7.076456],[-11.367116,7.080437],[-11.3654248,7.0814322],[-11.3627505,7.0809834],[-11.3594075,7.0802613],[-11.3557105,7.0797149],[-11.3530951,7.0795198],[-11.3488869,7.0803199],[-11.3470974,7.0801052],[-11.3452293,7.0795393],[-11.3419256,7.0778025],[-11.3397035,7.0772951],[-11.3372257,7.0768072],[-11.3350036,7.0767097],[-11.3341974,7.0768658],[-11.3336664,7.0779001],[-11.3335091,7.0784074],[-11.3327225,7.0787002],[-11.3326439,7.0799491],[-11.3328799,7.0820567],[-11.3334305,7.0860962],[-11.3332338,7.0883208],[-11.3340204,7.0910528],[-11.3348856,7.0922432],[-11.3350823,7.0928481],[-11.3349446,7.093336],[-11.3341974,7.0935507],[-11.3336271,7.0938824],[-11.3329388,7.0949557],[-11.3331355,7.0965363],[-11.3336468,7.0972583],[-11.3338238,7.0978633],[-11.3338238,7.0986048],[-11.3336861,7.0989365],[-11.3331748,7.0991121],[-11.3330962,7.0999122],[-11.3342171,7.1012392],[-11.334807,7.1028588],[-11.3349446,7.1036198],[-11.3365375,7.1053761],[-11.3366751,7.1070152],[-11.3357706,7.1088885],[-11.334769,7.110392],[-11.3334501,7.1113667],[-11.3330572,7.1120159],[-11.3329687,7.113333],[-11.3335291,7.1148941],[-11.3344828,7.1160746],[-11.3357709,7.1164844],[-11.3361937,7.1167088],[-11.3362428,7.1169429],[-11.3369803,7.1170991],[-11.3373637,7.1172747],[-11.3373342,7.1184552],[-11.3378652,7.1191577],[-11.3384256,7.1198114],[-11.3388843,7.119886],[-11.3394875,7.1200748],[-11.3404904,7.1206016],[-11.3404806,7.1207382],[-11.3405494,7.121187],[-11.3408739,7.1216944],[-11.3408739,7.1221919],[-11.3407264,7.1229432],[-11.3404019,7.123031],[-11.3402839,7.1238993],[-11.3405887,7.1243286],[-11.340805,7.1245823],[-11.3415031,7.126836],[-11.3422897,7.1282214],[-11.3433123,7.1296263],[-11.3439317,7.13028],[-11.3444233,7.1303385],[-11.3449149,7.1302995],[-11.3459277,7.1311971],[-11.3470387,7.1321239],[-11.3478056,7.1329922],[-11.3480514,7.1330215],[-11.3486021,7.1337727],[-11.3493395,7.1348361],[-11.3495755,7.1354898],[-11.3491625,7.1362313],[-11.3492805,7.1367581],[-11.3494181,7.1371191],[-11.349428,7.1376069],[-11.349428,7.1379874],[-11.3492903,7.1380166],[-11.3491527,7.1377825],[-11.3489855,7.1376459],[-11.349133,7.1382215],[-11.3497524,7.1391386],[-11.350893,7.1396557],[-11.3521515,7.1398215],[-11.3524858,7.1405142],[-11.3521614,7.1418996],[-11.3514534,7.1423971],[-11.3506373,7.1429239],[-11.3496443,7.1443483],[-11.3482481,7.1465824],[-11.3467437,7.1477336],[-11.3451706,7.147919],[-11.343971,7.1477141],[-11.3428207,7.1468946],[-11.3424864,7.1463873],[-11.3416604,7.1457629],[-11.3404511,7.1449825],[-11.3393498,7.1442898],[-11.3358987,7.1435581],[-11.3338142,7.1438215],[-11.3328998,7.1445337],[-11.3315331,7.1455581],[-11.3301861,7.1463971],[-11.3296355,7.147041],[-11.3291242,7.1474702],[-11.328495,7.1479483],[-11.3282688,7.148397],[-11.3280033,7.1485629],[-11.3280328,7.1493434],[-11.3287604,7.1504165],[-11.3292717,7.1508263],[-11.3299698,7.1519092],[-11.3299895,7.152436],[-11.3302943,7.1526311],[-11.3303631,7.1528652],[-11.3299993,7.1533628],[-11.3301959,7.1537432],[-11.3304713,7.1543676],[-11.3303336,7.1551383],[-11.3306876,7.1562797],[-11.3312677,7.1569334],[-11.33172,7.1573431],[-11.3323984,7.1575285],[-11.3333226,7.157548],[-11.3338831,7.1573138],[-11.3342567,7.1571578],[-11.3352006,7.1573138],[-11.3355447,7.1581431],[-11.3350531,7.1586406],[-11.3332735,7.1597528],[-11.3321231,7.1606503],[-11.3309432,7.161499],[-11.3308056,7.161899],[-11.3305008,7.1631965],[-11.3297338,7.1640745],[-11.3281902,7.1651086],[-11.3261155,7.1658598],[-11.3256632,7.166328],[-11.3254568,7.1667963],[-11.3250536,7.1669719],[-11.3239819,7.1669329],[-11.3232347,7.1671572],[-11.3223694,7.1677231],[-11.3216025,7.1682011],[-11.3210814,7.168445],[-11.3205701,7.1686303],[-11.320108,7.1691766],[-11.3199605,7.1695864],[-11.320285,7.1705619],[-11.3206389,7.1712643],[-11.3207569,7.1718301],[-11.3213174,7.172113],[-11.3220548,7.1726203],[-11.3223891,7.1729325],[-11.3221334,7.173508],[-11.3215828,7.1741909],[-11.3209142,7.1754884],[-11.3202653,7.1760639],[-11.319577,7.1776638],[-11.3189379,7.1782881],[-11.3182595,7.1785027],[-11.3178367,7.1788052],[-11.3168142,7.1798685],[-11.3158408,7.180288],[-11.3149165,7.1816244],[-11.3142381,7.1826585],[-11.313776,7.1829023],[-11.3127829,7.1835462],[-11.312016,7.1851655],[-11.3118193,7.1866776],[-11.3117407,7.1877799],[-11.3113081,7.1886579],[-11.3114457,7.1892334],[-11.3126846,7.191838],[-11.313422,7.1932817],[-11.3126354,7.1942377],[-11.3120946,7.1955351],[-11.311485,7.1962277],[-11.3099905,7.1976812],[-11.3094989,7.1994273],[-11.3095382,7.2003442],[-11.3087517,7.201349],[-11.3090171,7.202344],[-11.3092826,7.2030073],[-11.3098824,7.2034853],[-11.3105706,7.2040608],[-11.3108656,7.2052704],[-11.3113179,7.2078358],[-11.3111606,7.2088698],[-11.3104035,7.210294],[-11.3091843,7.211328],[-11.3081027,7.2120693],[-11.3063919,7.2127814],[-11.3049465,7.2136008],[-11.3042583,7.2138934],[-11.3035209,7.2136886],[-11.3026458,7.2132009],[-11.3024,7.2125278],[-11.3024295,7.211806],[-11.3027736,7.2098746],[-11.3032161,7.2083724],[-11.3033635,7.2077188],[-11.3037175,7.2073579],[-11.303629,7.206636],[-11.3027539,7.2055728],[-11.3020263,7.2049192],[-11.3010234,7.2045973],[-11.2995879,7.2045193],[-11.2974248,7.2050265],[-11.2951142,7.2059142],[-11.2936492,7.2060507],[-11.2930494,7.2057874],[-11.2926955,7.2054557],[-11.2925873,7.2048607],[-11.2920957,7.2044315],[-11.2912796,7.2041193],[-11.2904242,7.2041681],[-11.2897949,7.2040705],[-11.2897359,7.2038755],[-11.2899031,7.2032121],[-11.2908568,7.2022854],[-11.2918204,7.2015733],[-11.2935017,7.200832],[-11.2958713,7.1996614],[-11.2968054,7.1995053],[-11.2970119,7.1991932],[-11.2975035,7.1989688],[-11.2975821,7.1985591],[-11.2970905,7.1975251],[-11.2964613,7.1964325],[-11.295891,7.1960228],[-11.2954092,7.1959253],[-11.294131,7.1963935],[-11.2916336,7.1974471],[-11.2901292,7.1981982],[-11.2878875,7.1991249],[-11.2869534,7.1997882],[-11.2863143,7.2011441],[-11.2867469,7.2038852],[-11.2868157,7.20449],[-11.286393,7.2080407],[-11.2861275,7.2110158],[-11.2865011,7.2127326],[-11.2865503,7.2136788],[-11.2859505,7.2146445],[-11.2852524,7.2149664],[-11.2845051,7.2150445],[-11.2836006,7.2148494],[-11.2824404,7.21522],[-11.2811818,7.2160004],[-11.2806214,7.2171222],[-11.2806115,7.2183024],[-11.2808672,7.2191413],[-11.2809852,7.2199802],[-11.2798446,7.2209946],[-11.2796775,7.2218238],[-11.2792918,7.2221962],[-11.2774167,7.2225301],[-11.2767756,7.2232376],[-11.2763669,7.2242234],[-11.2760464,7.224756],[-11.2753091,7.2251933],[-11.2753652,7.2258134],[-11.2757995,7.226235],[-11.2761265,7.2265527],[-11.2767836,7.2264732],[-11.2771923,7.2268627],[-11.2765672,7.2275623],[-11.2762147,7.2279995],[-11.2752931,7.2277054],[-11.2748283,7.2282539],[-11.2730093,7.2286196],[-11.2723522,7.2292635],[-11.2721759,7.2302255],[-11.2718874,7.2307819],[-11.2723522,7.2311953],[-11.2737866,7.2310522],[-11.2737385,7.2317757],[-11.2735943,7.232356],[-11.2737545,7.2329602],[-11.2737225,7.2338187],[-11.2735462,7.2346057],[-11.2741151,7.2356551],[-11.2745238,7.2366806],[-11.2741873,7.2376345],[-11.2736023,7.2382228],[-11.2725525,7.2388747],[-11.2706854,7.238986],[-11.2697238,7.2385805],[-11.2683615,7.2374994],[-11.2676442,7.2365766],[-11.2677915,7.2354748],[-11.2681651,7.2336521],[-11.2680846,7.2335738],[-11.2677382,7.2325505],[-11.2672868,7.2320869],[-11.2667953,7.2317511],[-11.2653044,7.2311995],[-11.2637516,7.2309722],[-11.2629426,7.2307716],[-11.2621873,7.230587],[-11.2600293,7.2310603],[-11.2597077,7.2310771],[-11.2582269,7.2309092],[-11.2573977,7.2310855],[-11.2566192,7.2310099],[-11.2557646,7.2309176],[-11.2545545,7.2307833],[-11.2539707,7.2304727],[-11.2528368,7.2304475],[-11.2517368,7.2304727],[-11.2506114,7.231161],[-11.2495452,7.2322439],[-11.2484198,7.234141],[-11.245301,7.237005],[-11.2443256,7.2374172],[-11.2422895,7.2401134],[-11.2425048,7.2408074],[-11.2407467,7.245043],[-11.2388171,7.2462286],[-11.2343392,7.2506078],[-11.2296879,7.2495176],[-11.2283873,7.2486011],[-11.226849,7.2476223],[-11.2257457,7.2469104],[-11.2243643,7.2446325],[-11.2235929,7.2443655],[-11.2228864,7.2437831],[-11.221954,7.2439027],[-11.2207934,7.2448402],[-11.218177,7.2472939],[-11.2164265,7.2492444],[-11.2149296,7.2502385],[-11.2141178,7.2510187],[-11.2115173,7.2504399],[-11.2100048,7.2506117],[-11.2098167,7.2506704],[-11.2092035,7.2508621],[-11.2082178,7.251498],[-11.2048475,7.2532327],[-11.2035309,7.2530989],[-11.2019544,7.2537618],[-11.1997149,7.2553523],[-11.1979444,7.2568663],[-11.1963421,7.2589115],[-11.19304,7.2604803],[-11.1903217,7.2602003],[-11.1891623,7.2602689],[-11.1884376,7.2605128],[-11.1871497,7.2613528],[-11.1869327,7.2613281],[-11.1860966,7.261861],[-11.1852997,7.2626304],[-11.1848087,7.262821],[-11.1834979,7.2638392],[-11.1819412,7.2649526],[-11.1805351,7.2667849],[-11.1802571,7.2671408],[-11.1794837,7.2681313],[-11.1795998,7.2701184],[-11.1798611,7.271544],[-11.1807901,7.2723936],[-11.1826918,7.2734448],[-11.1836166,7.2746077],[-11.18361,7.2755945],[-11.1835705,7.2764897],[-11.1828788,7.2771758],[-11.182332,7.2773784],[-11.1817391,7.2771824],[-11.1808564,7.277104],[-11.1798946,7.2774242],[-11.1794137,7.2780449],[-11.1784848,7.2786853],[-11.1778063,7.2792016],[-11.1777404,7.2796002],[-11.1775494,7.280319],[-11.1772727,7.2809528],[-11.1772134,7.2818219],[-11.1772793,7.2824362],[-11.1770948,7.2831027],[-11.1762582,7.2833837],[-11.1754413,7.2836777],[-11.175382,7.2844815],[-11.1752569,7.2853375],[-11.1753688,7.2865007],[-11.1758827,7.2872194],[-11.1767259,7.2879317],[-11.1777141,7.2885982],[-11.1785112,7.2885133],[-11.179361,7.2886048],[-11.179888,7.2894673],[-11.1798551,7.2904801],[-11.1795323,7.2909637],[-11.1793149,7.2912773],[-11.1788406,7.2917543],[-11.1786759,7.2921529],[-11.1786561,7.2928456],[-11.1778985,7.2938258],[-11.1770092,7.2942636],[-11.1756455,7.2946687],[-11.174328,7.2947994],[-11.1734782,7.2949105],[-11.1728853,7.2956227],[-11.172378,7.2967597],[-11.172187,7.2976614],[-11.1721277,7.2984913],[-11.1717917,7.2995041],[-11.171436,7.3003274],[-11.1712186,7.3010854],[-11.1713965,7.3020329],[-11.1712252,7.3025425],[-11.1708826,7.3029346],[-11.1709287,7.3035031],[-11.1712977,7.3038559],[-11.1719169,7.30415],[-11.172187,7.3044048],[-11.1720157,7.3049733],[-11.1716666,7.305104],[-11.171212,7.3055025],[-11.1705137,7.3059011],[-11.1691501,7.306156],[-11.1676217,7.3065676],[-11.1666533,7.3067571],[-11.1655598,7.3064173],[-11.164565,7.3060253],[-11.1636559,7.3059338],[-11.1624899,7.3059077],[-11.1613437,7.3059403],[-11.1608146,7.3061148],[-11.1601821,7.3064354],[-11.1592545,7.3070488],[-11.1588328,7.3077041],[-11.1583831,7.3083175],[-11.1576241,7.3091678],[-11.1569213,7.3102552],[-11.1569916,7.3111753],[-11.1565981,7.3120675],[-11.1557267,7.3125694],[-11.1546866,7.3125415],[-11.1525924,7.3126112],[-11.1521989,7.3129458],[-11.1513837,7.3140331],[-11.1508496,7.3150369],[-11.1508215,7.3158872],[-11.1506669,7.3163751],[-11.1498517,7.3176856],[-11.1486492,7.3189799],[-11.1482889,7.3193957],[-11.1480989,7.3197662],[-11.147339,7.3201885],[-11.1467625,7.32026],[-11.1462646,7.3203575],[-11.145983,7.3205654],[-11.1458126,7.3209877],[-11.1453868,7.3210527],[-11.1450855,7.3212239],[-11.1443256,7.3215845],[-11.1435068,7.3219062],[-11.1429729,7.3225527],[-11.1427264,7.3230869],[-11.1424911,7.3232946],[-11.1420325,7.3234895],[-11.1419277,7.3236844],[-11.1420194,7.3239248],[-11.1421832,7.3241912],[-11.1421635,7.3245031],[-11.1420456,7.3247825],[-11.1418819,7.3248994],[-11.1417967,7.3252308],[-11.1419015,7.3253542],[-11.1421766,7.3252373],[-11.1423142,7.3253802],[-11.1422094,7.3258416],[-11.142157,7.3261144],[-11.1422815,7.3263029],[-11.1428776,7.3265758],[-11.1431789,7.3268032],[-11.1433886,7.327141],[-11.1433755,7.3275114],[-11.1430676,7.3291227],[-11.1424125,7.3304547],[-11.1418098,7.3307666],[-11.1413119,7.331059],[-11.1411875,7.3312409],[-11.1415347,7.3314163],[-11.1416853,7.3311044],[-11.1418622,7.3311044],[-11.1419539,7.3314488],[-11.1422029,7.3316307],[-11.1423011,7.3317477],[-11.1424059,7.3336644],[-11.1424053,7.3346397],[-11.1434608,7.3354364],[-11.1439278,7.3360107],[-11.1447403,7.3375762],[-11.1449365,7.3381413],[-11.1448398,7.338713],[-11.2111224,7.3463481],[-11.2360488,7.3629972],[-11.2500205,7.3711689],[-11.2558881,7.3746007],[-11.2869189,7.3806545],[-11.3011442,7.3968547],[-11.3396979,7.4261632],[-11.3474263,7.4404546],[-11.3524754,7.4680817],[-11.3551795,7.4728249],[-11.3557257,7.4737827],[-11.3543528,7.4767686],[-11.3542009,7.4784766],[-11.3530754,7.4807587],[-11.3527733,7.4827226],[-11.3541652,7.4843028],[-11.355261,7.4859277],[-11.355726,7.4864663],[-11.3555463,7.4867005],[-11.355685,7.4873368],[-11.3555309,7.4885585],[-11.3556028,7.489149],[-11.3568915,7.4899685],[-11.3597051,7.4911902],[-11.3602596,7.4933486],[-11.3610577,7.493896],[-11.3613275,7.4957356],[-11.3597051,7.4982401],[-11.3585755,7.4987796],[-11.3582675,7.5002253],[-11.3600337,7.5036562],[-11.3615123,7.5042874],[-11.3627548,7.5048982],[-11.3643772,7.5047251],[-11.3646442,7.5050814],[-11.3624131,7.5099528],[-11.3606073,7.5151699],[-11.35785,7.5176813],[-11.3566759,7.5213896],[-11.3532795,7.5248578],[-11.3489397,7.525952],[-11.3464587,7.525157],[-11.3462636,7.5239252],[-11.3452677,7.5222941],[-11.3415476,7.5227047],[-11.3384527,7.524736],[-11.3369912,7.5279056],[-11.335266,7.52929],[-11.3340671,7.532041],[-11.3340544,7.5339116],[-11.3360597,7.5371141],[-11.3345781,7.5395005],[-11.333286,7.5413707],[-11.3327652,7.5470468],[-11.3338407,7.5513005],[-11.3369654,7.5539491],[-11.3436339,7.5520226],[-11.3432601,7.5545552],[-11.341109,7.5581241],[-11.3380368,7.5629402],[-11.3367938,7.5634934],[-11.3376872,7.5644299],[-11.3398846,7.5651933],[-11.3413633,7.5659262],[-11.3423388,7.5660687],[-11.3433964,7.5668933],[-11.343725,7.5674735],[-11.3437148,7.5689392],[-11.3425236,7.5706188],[-11.3407197,7.5720783],[-11.3411542,7.5788038],[-11.3342402,7.5874936],[-11.3302276,7.5880069],[-11.3255514,7.587708],[-11.3228887,7.5871351],[-11.3176889,7.5914686],[-11.3161137,7.5928935],[-11.3147731,7.5938365],[-11.3147875,7.5969943],[-11.3111341,7.5997671],[-11.3439233,7.5953128],[-11.3672486,7.6065726],[-11.3705819,7.6570904],[-11.3944481,7.6324917],[-11.4089621,7.6156486],[-11.426258,7.6020346],[-11.44508,7.5768223],[-11.4583062,7.5475742],[-11.4725499,7.5390011],[-11.4873022,7.5440441],[-11.5025633,7.5435398],[-11.5073874,7.5494059],[-11.4892034,7.6209535],[-11.5039507,7.6396146],[-11.5152808,7.6469088],[-11.5366463,7.6680837],[-11.5729896,7.6664973],[-11.5847401,7.6322233],[-11.5956047,7.6306009],[-11.6095708,7.6371402],[-11.6229919,7.6360463],[-11.6454178,7.6345865],[-11.6592821,7.6321093],[-11.6726001,7.6308593],[-11.6964982,7.5813999],[-11.7109256,7.5625667],[-11.7114725,7.5619752],[-11.7123361,7.561637],[-11.7143307,7.5607351],[-11.7152222,7.5597386],[-11.7155506,7.5573179],[-11.7161889,7.5561974],[-11.7178508,7.5557566],[-11.7182547,7.5552678],[-11.7174313,7.5543952],[-11.7159823,7.5515494],[-11.7149487,7.5490603],[-11.7153671,7.5484658],[-11.716058,7.5481935],[-11.7180975,7.5487955],[-11.7197627,7.5492422],[-11.7217259,7.5489268],[-11.7218698,7.5501033],[-11.7227136,7.5526724],[-11.7235224,7.5527888],[-11.7448531,7.5871324],[-11.7370723,7.6428382],[-11.7344427,7.6541887],[-11.7555558,7.6714207],[-11.7803948,7.6603431],[-11.7779109,7.6320323],[-11.7952982,7.6184916],[-11.7890884,7.5852538],[-11.8027499,7.5852538],[-11.8251049,7.5951023],[-11.8499439,7.5827916],[-11.8487019,7.5618626],[-11.8424922,7.5507821],[-11.8449761,7.5347765],[-11.8524278,7.5187703],[-11.8648472,7.5138452],[-11.869815,7.4990696],[-11.8787831,7.5099942],[-11.8998623,7.4908393],[-11.8957278,7.4857153],[-11.893465,7.4833474],[-11.8899237,7.4831139],[-11.8903212,7.4778058],[-11.888413,7.476308],[-11.8900267,7.4713251],[-11.8872427,7.464309],[-11.89138,7.4620087],[-11.8943961,7.4570629],[-11.8943961,7.4545324],[-11.8933983,7.4530437],[-11.8934277,7.4528105],[-11.8935048,7.452439],[-11.8935526,7.4521512],[-11.8936996,7.4519544],[-11.8940045,7.4517905],[-11.8940743,7.4515282],[-11.8939604,7.4513752],[-11.8938649,7.4513206],[-11.8937583,7.4511457],[-11.8937694,7.4508834],[-11.8939972,7.45053],[-11.8941698,7.4502859],[-11.8941772,7.4499981],[-11.8939935,7.4497395],[-11.8939825,7.4495245],[-11.8941515,7.4491712],[-11.8941404,7.4487522],[-11.8940118,7.4483806],[-11.8939825,7.4478888],[-11.8940743,7.4472768],[-11.8941515,7.4467959],[-11.8943131,7.4460673],[-11.8945225,7.4453787],[-11.8948054,7.444927],[-11.8953125,7.4443623],[-11.8953896,7.4437576],[-11.8953492,7.4433969],[-11.8952133,7.4427339],[-11.8950847,7.4421619],[-11.894923,7.44163],[-11.8947577,7.4413058],[-11.8949487,7.4408431],[-11.8952427,7.4405516],[-11.8957056,7.4404023],[-11.8961648,7.4401181],[-11.8968556,7.4397283],[-11.8975206,7.4394806],[-11.8978365,7.4390434],[-11.8978733,7.4387119],[-11.8976859,7.438435],[-11.8973809,7.4384605],[-11.8971238,7.4385953],[-11.8964661,7.4385151],[-11.8961024,7.4383476],[-11.8956578,7.4378812],[-11.8953419,7.4371417],[-11.8949561,7.4365806],[-11.8944307,7.4359722],[-11.8938612,7.4356152],[-11.893435,7.4354112],[-11.8930052,7.4349048],[-11.8927627,7.4343838],[-11.8926341,7.4340632],[-11.8926378,7.4334876],[-11.892612,7.432657],[-11.8927553,7.4319648],[-11.892421,7.4313491],[-11.8919654,7.4307479],[-11.891249,7.4304383],[-11.8903782,7.4302087],[-11.8895332,7.4298845],[-11.8889086,7.4296149],[-11.8882289,7.429134],[-11.8875529,7.4281685],[-11.8869614,7.4273998],[-11.886278,7.4267331],[-11.8857232,7.4260992],[-11.8851611,7.4256329],[-11.8842609,7.4249989],[-11.8837319,7.4244707],[-11.8834931,7.4240663],[-11.8835739,7.4236109],[-11.883978,7.4232392],[-11.8846136,7.4227802],[-11.8853264,7.4222446],[-11.8855799,7.4217564],[-11.885444,7.4211444],[-11.8852346,7.4204631],[-11.8849039,7.4198874],[-11.8845365,7.4191952],[-11.8839156,7.4187835],[-11.8833424,7.4185285],[-11.882953,7.418605],[-11.8825305,7.4189001],[-11.8818948,7.4190094],[-11.8811086,7.4189293],[-11.8805024,7.4185431],[-11.8800835,7.418033],[-11.8800101,7.4174974],[-11.8802746,7.41694],[-11.8806163,7.4164263],[-11.8810755,7.4159964],[-11.8816597,7.4158725],[-11.8826113,7.4158215],[-11.8833534,7.4156248],[-11.8841103,7.4152495],[-11.8846026,7.4147285],[-11.8849957,7.4139489],[-11.8853374,7.4130016],[-11.8855689,7.4122256],[-11.8857489,7.4116572],[-11.8856938,7.4110451],[-11.8854807,7.4106771],[-11.8851317,7.4106298],[-11.8846981,7.4107172],[-11.8838384,7.4106443],[-11.8829971,7.4105715],[-11.8820969,7.4105022],[-11.8814576,7.4101707],[-11.8810866,7.4096971],[-11.8808735,7.4091323],[-11.8808294,7.408462],[-11.88116,7.4080248],[-11.881634,7.4078098],[-11.8820638,7.4078608],[-11.8825047,7.4081049],[-11.8832579,7.4081887],[-11.8838825,7.4081596],[-11.8845989,7.408043],[-11.8856901,7.4076641],[-11.8861751,7.4073179],[-11.8865388,7.4068224],[-11.8865352,7.4061448],[-11.8864066,7.4054853],[-11.8862523,7.4047676],[-11.8862155,7.4041336],[-11.8862559,7.4037146],[-11.8865425,7.4032519],[-11.8869246,7.4028183],[-11.8875125,7.402199],[-11.8881995,7.401667],[-11.8888535,7.4013172],[-11.8891805,7.400993],[-11.8894781,7.400727],[-11.8894854,7.4004027],[-11.8894156,7.3999582],[-11.889287,7.3996813],[-11.8890629,7.3995392],[-11.8886845,7.3994919],[-11.8883207,7.3994154],[-11.8879864,7.3993899],[-11.8875933,7.3994955],[-11.8873618,7.3995793],[-11.8868879,7.3998416],[-11.8864433,7.3999546],[-11.8859179,7.400042],[-11.8854329,7.4000311],[-11.8849076,7.3998672],[-11.8845659,7.399634],[-11.8845365,7.3993607],[-11.8846247,7.3990875],[-11.8846173,7.3987778],[-11.8845108,7.3985191],[-11.8844667,7.3982167],[-11.8843234,7.3979106],[-11.8843711,7.3975353],[-11.8844814,7.3971091],[-11.8845438,7.3965808],[-11.8845953,7.3962492],[-11.8847569,7.3959504],[-11.8848782,7.3957646],[-11.8849149,7.3955569],[-11.8848157,7.3952363],[-11.8847055,7.3947809],[-11.8845438,7.3946242],[-11.8843858,7.3946206],[-11.8842389,7.3946789],[-11.8840919,7.3946242],[-11.8839744,7.3946497],[-11.8838715,7.3947554],[-11.8838825,7.3948938],[-11.88382,7.3949594],[-11.8835996,7.3950068],[-11.8834857,7.3950614],[-11.8834144,7.3950818],[-11.8832585,7.3950354],[-11.8831078,7.3950354],[-11.8829571,7.3951694],[-11.8829156,7.3953188],[-11.8827441,7.3954115],[-11.8825467,7.3955661],[-11.8823232,7.3956743],[-11.8821518,7.3955146],[-11.8819284,7.3953549],[-11.8817309,7.3950096],[-11.8815387,7.3948293],[-11.8811334,7.3946799],[-11.88091,7.3946489],[-11.8808684,7.3944377],[-11.8807333,7.3943243],[-11.8805722,7.3943192],[-11.8804371,7.3942316],[-11.8799227,7.3942264],[-11.8795746,7.3941801],[-11.8793876,7.3939946],[-11.8792473,7.3938091],[-11.8792577,7.3936339],[-11.87932,7.393201],[-11.8792369,7.3928919],[-11.8790083,7.3924951],[-11.8790914,7.3919747],[-11.8789719,7.3913821],[-11.8790031,7.3910524],[-11.8791434,7.3904392],[-11.8791589,7.3897848],[-11.8792888,7.3890995],[-11.8794032,7.3884708],[-11.8796681,7.3879195],[-11.8801773,7.3867447],[-11.8802916,7.3857863],[-11.8800942,7.3850752],[-11.879637,7.3846011],[-11.8794707,7.3838179],[-11.8792421,7.3831686],[-11.8791486,7.3823442],[-11.8792693,7.3815716],[-11.8810755,7.3782583],[-11.8832984,7.3764323],[-11.8845627,7.3749138],[-11.8851244,7.3729391],[-11.886871,7.3711131],[-11.8888558,7.3670641],[-11.8907612,7.3616655],[-11.8917139,7.3565051],[-11.8911582,7.3515829],[-11.8895413,7.3492079],[-11.8955175,7.3418897],[-11.9042965,7.3353753],[-11.8966689,7.3295523],[-11.8991341,7.3245923],[-11.9008431,7.2991605],[-11.9007489,7.2944113],[-11.893922,7.287915],[-11.879889,7.2806548],[-11.8820409,7.2694888],[-11.8854807,7.2548812],[-11.8888995,7.2499814],[-11.8915191,7.2423319],[-11.8912948,7.2360627],[-11.8930442,7.2245501],[-11.8948731,7.2140979],[-11.8977706,7.2113102],[-11.9068305,7.2122373],[-11.9130721,7.218233],[-11.922751,7.2128486],[-11.9270108,7.2226297],[-11.9350068,7.2288971],[-11.9393082,7.2280393],[-11.9485349,7.2188859],[-11.9600344,7.1921192],[-11.960198,7.1917972]]],[[[-11.5807728,6.9866997],[-11.5807031,6.9866038],[-11.5804696,6.9866064],[-11.5795791,6.9868861],[-11.5784392,6.9874264],[-11.5778009,6.9878525],[-11.577487,6.9882385],[-11.5774521,6.9883076],[-11.5774736,6.9884062],[-11.5776238,6.9884487],[-11.5779242,6.9883422],[-11.5783413,6.9881061],[-11.5793567,6.9875653],[-11.5807191,6.9868087],[-11.5807728,6.9866997]]],[[[-11.5777692,6.9853927],[-11.5780315,6.9852487],[-11.5785653,6.9851036],[-11.5793806,6.9848041],[-11.5800163,6.9846471],[-11.5803623,6.9845085],[-11.5812269,6.984105],[-11.58257,6.983106],[-11.5834221,6.9821112],[-11.5840684,6.9815001],[-11.5851757,6.9807296],[-11.5856646,6.980263],[-11.5859288,6.9796885],[-11.586536,6.977547],[-11.5873358,6.9766856],[-11.5875749,6.9763859],[-11.5876848,6.9760663],[-11.5876366,6.9755925],[-11.5874487,6.9751612],[-11.587261,6.9748683],[-11.5865321,6.9744168],[-11.5861103,6.974256],[-11.5855658,6.9741016],[-11.5850294,6.9739418],[-11.5845197,6.9738832],[-11.5842193,6.9738752],[-11.5837902,6.9738753],[-11.5833235,6.974003],[-11.5824813,6.9743225],[-11.5819609,6.9745169],[-11.581454,6.9747831],[-11.5806145,6.9753875],[-11.5802658,6.9756777],[-11.5797535,6.9763033],[-11.5787825,6.9770195],[-11.5780234,6.9777303],[-11.5772215,6.9783879],[-11.5762639,6.9793144],[-11.5757918,6.9800386],[-11.5755343,6.980571],[-11.5753981,6.9809619],[-11.5753332,6.981407],[-11.5752179,6.9817877],[-11.5749739,6.9824906],[-11.5747272,6.9831765],[-11.5741423,6.9845885],[-11.5738746,6.9853934],[-11.5737132,6.9858557],[-11.5736917,6.9861139],[-11.5737292,6.9865772],[-11.5737668,6.9869685],[-11.5737158,6.9872348],[-11.5737292,6.9873811],[-11.5738286,6.9874771],[-11.5739743,6.9874856],[-11.5744927,6.9872266],[-11.5749083,6.9869395],[-11.5753129,6.9865774],[-11.5757831,6.9863055],[-11.5770035,6.9858975],[-11.5777692,6.9853927]]]]}]}
