# Supplementary material
Source: ML conference proceedings conference paper supplement (https://proceedings.neurips.cc/paper_files/paper/2022/hash/9d3faa41886997cfc2128b930077fa49-Abstract.html)
Supplement: Supplementary file 1 [file 9d3faa41886997cfc2128b930077fa49-Supplemental-Conference.zip › code/ebola/map/geojson/rivercess.geojson]

{"type":"GeometryCollection","geometries":[{"type":"MultiPolygon","coordinates":[[[[-9.5594144,5.6846386],[-9.5601626,5.6916921],[-9.5609712,5.7040628],[-9.5597266,5.7097698],[-9.5574016,5.7204288],[-9.5589995,5.7248168],[-9.562192,5.7300021],[-9.5684,5.7293859],[-9.5558297,5.73625],[-9.5528408,5.7378818],[-9.5526374,5.7379928],[-9.5509754,5.7383585],[-9.5314757,5.7426506],[-9.5248302,5.7444479],[-9.5215664,5.7452056],[-9.5194557,5.7481877],[-9.5130292,5.7572672],[-9.5023382,5.7723712],[-9.4913217,5.7879338],[-9.4877539,5.8094875],[-9.4878426,5.8147776],[-9.4881742,5.8346295],[-9.4874685,5.8388925],[-9.4842098,5.8585778],[-9.4770457,5.8693589],[-9.4762871,5.8709901],[-9.4685103,5.887715],[-9.4659067,5.8933133],[-9.4551547,5.9040977],[-9.4467176,5.909483],[-9.4463856,5.9094923],[-9.4388185,5.9096979],[-9.4320379,5.9029187],[-9.4284541,5.9073111],[-9.429892,5.920532],[-9.4300598,5.9220764],[-9.4252797,5.9256714],[-9.4189028,5.9256763],[-9.4081419,5.9264826],[-9.4021303,5.926487],[-9.4001704,5.9264885],[-9.3945904,5.9264925],[-9.3890122,5.9288908],[-9.3810422,5.9312907],[-9.3666973,5.9368881],[-9.3575296,5.936495],[-9.3471643,5.9329097],[-9.3320149,5.9273318],[-9.3296292,5.9373101],[-9.3148871,5.9468969],[-9.3168172,5.9542232],[-9.3168845,5.9544787],[-9.3288445,5.9580636],[-9.3384107,5.9580578],[-9.3420009,5.9624453],[-9.337221,5.9680354],[-9.3318401,5.9701554],[-9.3260628,5.9724323],[-9.3226615,5.9741373],[-9.3093259,5.9808227],[-9.2993633,5.9856171],[-9.3001636,5.991603],[-9.3008537,6.0018796],[-9.3009676,6.0035752],[-9.2882173,6.0151555],[-9.2706863,6.0335226],[-9.2667054,6.0454973],[-9.2660761,6.0469342],[-9.2595373,6.0618636],[-9.2523666,6.0734405],[-9.2507349,6.0821743],[-9.2499805,6.0862126],[-9.2432015,6.0838213],[-9.2217801,6.074816],[-9.0944287,6.0265082],[-9.0959445,6.0249148],[-9.0958859,6.0239488],[-9.095129,6.0233166],[-9.090878,6.0207362],[-9.0887891,6.0182808],[-9.087968,6.0170562],[-9.0873886,6.0161172],[-9.0870655,6.0157828],[-9.085436,6.0143247],[-9.0845292,6.0132144],[-9.0798918,6.0112379],[-9.0777939,6.0098104],[-9.0763585,6.0045945],[-9.0753096,6.0036062],[-9.0721627,6.0037709],[-9.0690711,6.0027277],[-9.0690159,6.0010257],[-9.0680774,6.0003668],[-9.0681878,5.9988295],[-9.0690711,5.9974019],[-9.0717211,5.9960293],[-9.0712794,5.9939978],[-9.0725492,5.9935586],[-9.0751991,5.9916918],[-9.0754459,5.9878359],[-9.0765148,5.9869342],[-9.0777514,5.9867725],[-9.0795957,5.9881633],[-9.0807275,5.9884686],[-9.0811352,5.9858259],[-9.082523,5.9854913],[-9.0849463,5.9850292],[-9.0871072,5.9851955],[-9.0872343,5.9860913],[-9.0896146,5.987468],[-9.0935052,5.9880736],[-9.0959357,5.9907213],[-9.0975336,5.9910614],[-9.0999518,5.988094],[-9.099932,5.9848834],[-9.0997341,5.9814792],[-9.1003185,5.979228],[-9.1029132,5.9776357],[-9.1016435,5.9766474],[-9.0998216,5.9764826],[-9.0996008,5.9751649],[-9.1006497,5.9728038],[-9.1014778,5.9730784],[-9.1015883,5.9740118],[-9.102582,5.9743961],[-9.1031893,5.9733529],[-9.104459,5.9730235],[-9.103907,5.9711017],[-9.1045695,5.9685759],[-9.1057288,5.9681366],[-9.1057901,5.9680202],[-9.103922,5.9649046],[-9.1013824,5.9655635],[-9.0995606,5.964685],[-9.0979596,5.9644105],[-9.096745,5.9633123],[-9.0962482,5.9611708],[-9.0949232,5.9591941],[-9.0915426,5.9574923],[-9.0909483,5.9554054],[-9.0917764,5.9530443],[-9.0903962,5.9500242],[-9.0893606,5.94968],[-9.0880789,5.9496058],[-9.0847098,5.9478827],[-9.0837713,5.9457961],[-9.0811766,5.9444234],[-9.0788026,5.9437095],[-9.0773672,5.9449725],[-9.0764839,5.9454118],[-9.0759319,5.9444234],[-9.0762631,5.9432153],[-9.0756558,5.9416779],[-9.0765943,5.9393168],[-9.0785818,5.9371203],[-9.0845442,5.9349239],[-9.0865317,5.9351435],[-9.0917764,5.9376145],[-9.0921076,5.9355279],[-9.0896233,5.9327274],[-9.0902306,5.9315742],[-9.0929909,5.9306957],[-9.0956961,5.9287188],[-9.0958065,5.9271264],[-9.0966898,5.9253692],[-9.096745,5.9241062],[-9.095144,5.9207565],[-9.092218,5.9180108],[-9.092218,5.916638],[-9.0918868,5.914716],[-9.0926597,5.9129039],[-9.0931013,5.9093345],[-9.0944815,5.9077969],[-9.0947024,5.9065339],[-9.0931013,5.9056003],[-9.0913347,5.907083],[-9.0900097,5.9067535],[-9.0879671,5.9054905],[-9.0882431,5.904502],[-9.0874702,5.9029644],[-9.0856483,5.903239],[-9.0846546,5.9024702],[-9.0836752,5.9009324],[-9.0797459,5.8930777],[-9.0769122,5.8909355],[-9.0729829,5.8873275],[-9.071396,5.8840955],[-9.0712071,5.8819908],[-9.0722272,5.880525],[-9.0738141,5.8795854],[-9.0748342,5.8782324],[-9.074343,5.8761277],[-9.0743808,5.8743613],[-9.0784991,5.8714298],[-9.0800481,5.8685358],[-9.085451,5.8662431],[-9.0861311,5.8644391],[-9.0846198,5.8630484],[-9.0830329,5.8641384],[-9.0824662,5.863086],[-9.0815594,5.8592524],[-9.0815216,5.8566214],[-9.0827685,5.8528629],[-9.0820884,5.8510964],[-9.0820506,5.8488037],[-9.0834485,5.8468116],[-9.08632,5.845872],[-9.0873401,5.8446692],[-9.0885491,5.8455337],[-9.0895315,5.8446692],[-9.090136,5.8431282],[-9.0918362,5.8423765],[-9.0931208,5.8404972],[-9.0936498,5.8386179],[-9.0956144,5.8373399],[-9.0973524,5.8360244],[-9.0976547,5.8346337],[-9.097428,5.8318147],[-9.0959545,5.8314012],[-9.0960678,5.829785],[-9.0946699,5.8294467],[-9.0936115,5.8289076],[-9.0919554,5.8207761],[-9.0919445,5.8193206],[-9.092499,5.8187564],[-9.0936742,5.8185553],[-9.0955817,5.8189849],[-9.0975536,5.8195001],[-9.0982923,5.8202742],[-9.0990025,5.8212939],[-9.1005657,5.8222724],[-9.102898,5.8229236],[-9.1052873,5.8225713],[-9.107786,5.8205767],[-9.1089953,5.8199379],[-9.1098915,5.8198115],[-9.1116683,5.8204422],[-9.114239,5.8210303],[-9.1155447,5.8204361],[-9.1162085,5.8197369],[-9.1181974,5.8178222],[-9.1189549,5.8166059],[-9.1191544,5.8150483],[-9.1199485,5.8107689],[-9.1194853,5.8085963],[-9.1194191,5.8066211],[-9.1200809,5.805041],[-9.1219339,5.8026708],[-9.1243824,5.7996422],[-9.1259045,5.798523],[-9.1283531,5.7981938],[-9.1298752,5.7976671],[-9.1306693,5.7967453],[-9.1306693,5.793585],[-9.1301399,5.7923341],[-9.129081,5.7916757],[-9.1282207,5.7903589],[-9.1281546,5.7887787],[-9.128684,5.786606],[-9.1294119,5.7855525],[-9.1306693,5.7852892],[-9.1325223,5.7859476],[-9.133912,5.7861451],[-9.1356988,5.7852892],[-9.1394709,5.7825238],[-9.1401989,5.7812729],[-9.1405298,5.7785075],[-9.1414563,5.7773224],[-9.1478093,5.7725159],[-9.1491329,5.7717258],[-9.1515815,5.7710016],[-9.1552212,5.7699481],[-9.1569419,5.7689605],[-9.1578683,5.7677094],[-9.1582654,5.7658],[-9.1578683,5.7641539],[-9.1567433,5.7623762],[-9.1565448,5.7607959],[-9.1565448,5.759084],[-9.1587287,5.7563185],[-9.1648832,5.7507218],[-9.1660082,5.7485489],[-9.1664714,5.7463102],[-9.1656773,5.7438739],[-9.1656773,5.742557],[-9.1668685,5.7393964],[-9.1671332,5.7378161],[-9.16667,5.7361041],[-9.1647508,5.733141],[-9.1603831,5.7272806],[-9.1595228,5.7257661],[-9.1587287,5.7235273],[-9.1576036,5.7218811],[-9.1515815,5.71714],[-9.1486035,5.7135842],[-9.1472799,5.7122672],[-9.1449637,5.7104234],[-9.1440372,5.7093698],[-9.1437725,5.7077236],[-9.143971,5.70667],[-9.1448975,5.7062091],[-9.1460225,5.7064066],[-9.1474123,5.7083821],[-9.1499932,5.7110819],[-9.1512506,5.7118063],[-9.1536991,5.7123989],[-9.1560154,5.7122014],[-9.156611,5.7112795],[-9.156611,5.7104234],[-9.1557507,5.7089747],[-9.155883,5.7076578],[-9.1568757,5.7048921],[-9.1581992,5.7035092],[-9.1598537,5.7028507],[-9.1624346,5.7030483],[-9.1634934,5.7038385],[-9.1643538,5.7038385],[-9.1647508,5.7026532],[-9.1645523,5.700546],[-9.1628317,5.6976485],[-9.162567,5.6958706],[-9.162567,5.6939609],[-9.1633611,5.6931707],[-9.1646185,5.6931048],[-9.1662067,5.6934341],[-9.1671994,5.695212],[-9.167795,5.6958706],[-9.1693171,5.6958706],[-9.1735525,5.6942901],[-9.1754054,5.6923804],[-9.1791776,5.6906025],[-9.181394,5.6904882],[-9.1830786,5.6916057],[-9.1842016,5.6937477],[-9.1838273,5.6959827],[-9.1835465,5.6971003],[-9.1842952,5.6983109],[-9.1908465,5.7034329],[-9.1924375,5.7051091],[-9.1936542,5.7059473],[-9.1949644,5.7059473],[-9.1959003,5.7043641],[-9.1958067,5.7021291],[-9.1949644,5.7006391],[-9.1953388,5.6990559],[-9.1969298,5.6981247],[-9.1996439,5.6985903],[-9.2026387,5.6982178],[-9.2059144,5.6967278],[-9.2066631,5.6944927],[-9.2087221,5.691792],[-9.2134015,5.6875081],[-9.2187361,5.686018],[-9.2224797,5.6837829],[-9.2294989,5.6754944],[-9.2385771,5.6693477],[-9.2464386,5.6665538],[-9.260477,5.664598],[-9.2661523,5.6644222],[-9.2694128,5.6618098],[-9.2705847,5.6593825],[-9.2712948,5.6575632],[-9.2729026,5.656436],[-9.2734046,5.656084],[-9.2781275,5.6534835],[-9.2834379,5.6515271],[-9.2856795,5.649869],[-9.2854877,5.6463858],[-9.2859072,5.6455746],[-9.2916491,5.642139],[-9.2986496,5.6375821],[-9.2999322,5.6373077],[-9.3014786,5.6369975],[-9.3027492,5.6347668],[-9.3042596,5.6332637],[-9.3034345,5.6276232],[-9.3043704,5.6252016],[-9.306078,5.6235764],[-9.3066849,5.6233434],[-9.3082018,5.6227609],[-9.3108707,5.6216495],[-9.3117054,5.6199724],[-9.3116136,5.6177432],[-9.3125504,5.6167555],[-9.3139758,5.6163302],[-9.3176813,5.6167811],[-9.3182463,5.617028],[-9.3189736,5.6176195],[-9.3197307,5.6182527],[-9.3210017,5.6186816],[-9.3224347,5.6191211],[-9.3240137,5.6194208],[-9.3251,5.6193886],[-9.3261214,5.6189745],[-9.3267233,5.6184788],[-9.3272602,5.617445],[-9.3273814,5.6161063],[-9.3273608,5.6145809],[-9.3278324,5.612496],[-9.3280867,5.6115863],[-9.3283735,5.6111612],[-9.3287876,5.6109457],[-9.3292882,5.6108487],[-9.330138,5.6108255],[-9.3309392,5.6110069],[-9.3323299,5.6118819],[-9.333342,5.6121328],[-9.3342541,5.6119926],[-9.3353718,5.6114006],[-9.3366288,5.6097083],[-9.3372244,5.6079959],[-9.3386755,5.6054477],[-9.3402891,5.6043788],[-9.3419688,5.6041916],[-9.3450201,5.6050792],[-9.3465252,5.6047198],[-9.3486854,5.6038773],[-9.3515983,5.6032847],[-9.3537182,5.6019012],[-9.3543832,5.6018798],[-9.3551817,5.6017258],[-9.3575506,5.6002995],[-9.3581183,5.5996801],[-9.3584975,5.5988966],[-9.3585336,5.5983143],[-9.3576654,5.5956288],[-9.3576172,5.5950309],[-9.3576733,5.5940991],[-9.3572148,5.5924735],[-9.3561956,5.5903326],[-9.3561512,5.5877762],[-9.3570777,5.581124],[-9.3569453,5.5783577],[-9.3576328,5.5772332],[-9.35834,5.5771275],[-9.3591265,5.577394],[-9.3596118,5.5779603],[-9.3607845,5.5800454],[-9.3615614,5.5818327],[-9.3624986,5.5826488],[-9.3636449,5.5830818],[-9.3646239,5.5828403],[-9.3660715,5.5820159],[-9.3672596,5.5802754],[-9.3687521,5.5764283],[-9.3694976,5.5754743],[-9.3704679,5.5747088],[-9.3723775,5.5737574],[-9.3764333,5.572236],[-9.3782372,5.5724537],[-9.3793919,5.5720873],[-9.381371,5.5714837],[-9.38218,5.5714778],[-9.3828413,5.5715897],[-9.3836922,5.5720025],[-9.3844692,5.5725771],[-9.3854173,5.5734176],[-9.3864,5.5742113],[-9.3874344,5.5748655],[-9.388099,5.5752277],[-9.3888523,5.5755458],[-9.3898711,5.5756968],[-9.3906919,5.5755953],[-9.3913796,5.575369],[-9.392288,5.5745749],[-9.3931742,5.5736707],[-9.3941882,5.5723688],[-9.3963402,5.5700372],[-9.3970528,5.5691253],[-9.3975593,5.5681658],[-9.3977777,5.5671257],[-9.3978067,5.5661306],[-9.3976879,5.5639662],[-9.3978505,5.5619911],[-9.3977988,5.5605899],[-9.3973792,5.5592302],[-9.3969265,5.5575695],[-9.3970059,5.5565932],[-9.3972979,5.5558573],[-9.397649,5.5554305],[-9.3984185,5.5552385],[-9.3993897,5.5555176],[-9.4010156,5.5563267],[-9.4055049,5.5574657],[-9.4077734,5.5579346],[-9.4097545,5.5586309],[-9.4116528,5.5598236],[-9.4121687,5.5599508],[-9.4126128,5.5598025],[-9.4127269,5.5592884],[-9.4126516,5.5588199],[-9.412836,5.5583106],[-9.4127969,5.5567557],[-9.413016,5.5551369],[-9.4135851,5.5524818],[-9.4143759,5.5503463],[-9.4168765,5.5463447],[-9.4183356,5.5447094],[-9.4193684,5.5439636],[-9.4202297,5.5436673],[-9.4211478,5.5437971],[-9.421979,5.544636],[-9.422514,5.5462655],[-9.4231924,5.5483652],[-9.4249477,5.5521053],[-9.4275194,5.5560347],[-9.429637,5.5582146],[-9.4305638,5.5587313],[-9.4314355,5.5589878],[-9.4323928,5.5588819],[-9.4333636,5.5581189],[-9.4336642,5.5574113],[-9.4337995,5.5567038],[-9.4337377,5.5558124],[-9.4336757,5.5553591],[-9.4330053,5.553147],[-9.432705,5.5497061],[-9.4330715,5.5462968],[-9.4331377,5.5439255],[-9.4344234,5.5425851],[-9.4355714,5.5418483],[-9.4375992,5.5417949],[-9.4385862,5.5414317],[-9.4396591,5.5411221],[-9.4404164,5.5406191],[-9.440726,5.5397597],[-9.4409719,5.5393018],[-9.4413689,5.5391731],[-9.4423329,5.5392916],[-9.4436415,5.5393437],[-9.4452155,5.5391489],[-9.4461724,5.5386201],[-9.4472095,5.5386532],[-9.4476668,5.5388346],[-9.4484399,5.5394644],[-9.450785,5.540817],[-9.4517049,5.54212],[-9.4520341,5.5423511],[-9.4525852,5.5423775],[-9.453222,5.5421418],[-9.4567291,5.5404829],[-9.4601429,5.5394272],[-9.4611143,5.5394179],[-9.4632811,5.5405986],[-9.4636511,5.5412175],[-9.4642492,5.5413936],[-9.4648341,5.5413598],[-9.4653624,5.5409432],[-9.4669857,5.5403309],[-9.4691186,5.5402825],[-9.4750211,5.5406099],[-9.4756554,5.5407232],[-9.4761722,5.5405993],[-9.4768425,5.5403105],[-9.4770975,5.5398652],[-9.4772425,5.5371818],[-9.47781,5.535053],[-9.4789307,5.5325995],[-9.4788003,5.531147],[-9.478212,5.5298942],[-9.4785065,5.5288854],[-9.4795375,5.5280593],[-9.4797194,5.5274266],[-9.4802244,5.526822],[-9.4817987,5.5269016],[-9.4825436,5.5268915],[-9.4832681,5.5267018],[-9.4836396,5.526358],[-9.4833791,5.5251565],[-9.4838298,5.5239671],[-9.4834374,5.5222229],[-9.4842199,5.5194384],[-9.4840947,5.5184483],[-9.4842278,5.5178259],[-9.4845938,5.5175453],[-9.4854188,5.5175558],[-9.4864929,5.5181177],[-9.4876341,5.5193114],[-9.4885769,5.5205105],[-9.4889597,5.5217682],[-9.4895523,5.5220471],[-9.4900167,5.5220595],[-9.4907834,5.5214611],[-9.4913172,5.5212912],[-9.4921724,5.5212434],[-9.4919006,5.5297264],[-9.4907134,5.539305],[-9.4931116,5.5492803],[-9.5026924,5.5748134],[-9.5030526,5.5759529],[-9.5074854,5.5899745],[-9.519063,5.619497],[-9.5286347,5.6318595],[-9.5378912,5.6413963],[-9.541793,5.6454165],[-9.556924,5.6599856],[-9.553766,5.6685518],[-9.5537721,5.6749371],[-9.5593583,5.6841106],[-9.5594144,5.6846386]]]]}]}
