# Supplementary material
Source: ML conference proceedings conference paper supplement (https://proceedings.neurips.cc/paper_files/paper/2022/hash/9d3faa41886997cfc2128b930077fa49-Abstract.html)
Supplement: Supplementary file 1 [file 9d3faa41886997cfc2128b930077fa49-Supplemental-Conference.zip › code/ebola/map/geojson/siguiri.geojson]

{"type":"GeometryCollection","geometries":[{"type":"MultiPolygon","coordinates":[[[[-9.2162097,11.4047329],[-9.2167756,11.4045909],[-9.2172074,11.4043464],[-9.2178887,11.4042254],[-9.2197502,11.403555],[-9.2205146,11.4033893],[-9.2211288,11.4031606],[-9.2224163,11.4028898],[-9.2229474,11.4026689],[-9.2234838,11.4023928],[-9.2240605,11.4017986],[-9.2248839,11.4006575],[-9.2258442,11.3988328],[-9.2261607,11.3984174],[-9.2266595,11.3980703],[-9.2280489,11.3975181],[-9.2281455,11.3973893],[-9.2277995,11.3971684],[-9.2271718,11.3969528],[-9.2235026,11.3954436],[-9.2205951,11.3943498],[-9.2195597,11.3937766],[-9.2177546,11.3929852],[-9.2158181,11.3923068],[-9.213801,11.3914181],[-9.211387,11.3906398],[-9.2045045,11.3879525],[-9.2025143,11.3869376],[-9.1987377,11.3855229],[-9.1941297,11.3830145],[-9.1886473,11.3805217],[-9.1836155,11.3780921],[-9.1795439,11.3766275],[-9.177146,11.3763251],[-9.1768295,11.377766],[-9.1763574,11.3791071],[-9.1753435,11.3807584],[-9.175601,11.3809674],[-9.1757579,11.381371],[-9.1762179,11.3855755],[-9.1763386,11.3860041],[-9.1768751,11.3869165],[-9.1784173,11.3895275],[-9.1793025,11.39095],[-9.1796002,11.3916363],[-9.1799837,11.393093],[-9.1800186,11.3936031],[-9.1793937,11.399966],[-9.17864,11.4038757],[-9.1775805,11.4093498],[-9.1771996,11.4100439],[-9.1751772,11.4130149],[-9.174968,11.4132752],[-9.1747776,11.4134145],[-9.174571,11.4134619],[-9.1718996,11.4138694],[-9.1724494,11.4166037],[-9.1753609,11.4160371],[-9.1794688,11.4152878],[-9.1808085,11.4149145],[-9.1813155,11.4148014],[-9.1818345,11.4147633],[-9.1818546,11.4144649],[-9.1832989,11.4142821],[-9.1833392,11.4143952],[-9.1918418,11.4127046],[-9.1935208,11.4130964],[-9.1944087,11.4133803],[-9.1944408,11.4135749],[-9.1960046,11.4131621],[-9.1962647,11.4132673],[-9.2011893,11.4125311],[-9.2020208,11.4122209],[-9.202466,11.4118528],[-9.2060548,11.4100702],[-9.2074013,11.4092183],[-9.2132431,11.406058],[-9.2143053,11.4051115],[-9.2162097,11.4047329]]]]}]}
