# Supplementary material
Source: ML conference proceedings conference paper supplement (https://proceedings.neurips.cc/paper_files/paper/2022/hash/9d3faa41886997cfc2128b930077fa49-Abstract.html)
Supplement: Supplementary file 1 [file 9d3faa41886997cfc2128b930077fa49-Supplemental-Conference.zip › code/ebola/map/geojson/sinoe.geojson]

{"type":"GeometryCollection","geometries":[{"type":"MultiPolygon","coordinates":[[[[-9.431221,5.277327],[-9.4300676,5.2766752],[-9.4289143,5.2760236],[-9.427541,5.2752543],[-9.4266559,5.2746668],[-9.4252558,5.2737052],[-9.4243116,5.2730216],[-9.4229705,5.2719638],[-9.4213129,5.270698],[-9.419945,5.2696455],[-9.418282,5.2682675],[-9.4172628,5.267418],[-9.4162649,5.266793],[-9.4156454,5.2663978],[-9.4153744,5.2662173],[-9.4150595,5.265998],[-9.4148533,5.2658461],[-9.4146541,5.2657043],[-9.4144093,5.2654959],[-9.414227,5.2653731],[-9.4139641,5.2651461],[-9.4135188,5.2648122],[-9.4131513,5.2645236],[-9.4126042,5.2641417],[-9.4122286,5.2638292],[-9.4119416,5.2635941],[-9.4115607,5.2633191],[-9.4111129,5.26298],[-9.4107159,5.2627422],[-9.410429,5.26255],[-9.4100695,5.2623282],[-9.4095786,5.262005],[-9.4090503,5.2616018],[-9.408334,5.2610087],[-9.4079265,5.2605708],[-9.4076742,5.2603383],[-9.407398,5.26013],[-9.4071244,5.2599163],[-9.406918,5.2597161],[-9.4066792,5.2595263],[-9.4065478,5.2593929],[-9.4063011,5.2591686],[-9.4061267,5.2589496],[-9.4058477,5.258565],[-9.4057351,5.2582551],[-9.405711,5.2580628],[-9.4057432,5.25798],[-9.4058022,5.2578785],[-9.4059013,5.2578784],[-9.4059791,5.2577075],[-9.4059523,5.2575072],[-9.4057404,5.2573069],[-9.4055687,5.2571252],[-9.4053917,5.2570104],[-9.4049787,5.2567407],[-9.4043666,5.256343],[-9.4042533,5.2562796],[-9.4039065,5.2560893],[-9.4035384,5.255906],[-9.4032411,5.2557721],[-9.4030571,5.2556241],[-9.4028093,5.2553774],[-9.4026721,5.255258],[-9.4025825,5.2551544],[-9.4024301,5.2551003],[-9.4022268,5.255094],[-9.4020568,5.2551029],[-9.4016481,5.2549352],[-9.4011141,5.2546818],[-9.4007342,5.2544961],[-9.4000216,5.2542326],[-9.3993631,5.2538642],[-9.3989025,5.2537061],[-9.3981225,5.2531767],[-9.3976289,5.252971],[-9.3971462,5.2526238],[-9.3968645,5.2523033],[-9.3964782,5.2519],[-9.3962878,5.2514246],[-9.3962047,5.2510506],[-9.396009,5.2507969],[-9.3959017,5.2505859],[-9.3959504,5.2504504],[-9.3958078,5.2501692],[-9.3955958,5.2498994],[-9.3951747,5.2495869],[-9.394716,5.24944],[-9.3943566,5.2491462],[-9.3937907,5.2488257],[-9.3934045,5.2488097],[-9.39297,5.2487082],[-9.3926802,5.2485266],[-9.3924201,5.2481526],[-9.3921036,5.2478802],[-9.3915859,5.2476238],[-9.3912157,5.2474849],[-9.3908268,5.24733],[-9.3903735,5.2471457],[-9.3898693,5.2469374],[-9.389526,5.2467985],[-9.3891907,5.2467263],[-9.3889546,5.2466916],[-9.3887803,5.2466649],[-9.388614,5.2466248],[-9.3883538,5.2465127],[-9.3880212,5.2463871],[-9.3876269,5.2462055],[-9.3873212,5.2459491],[-9.3870503,5.245666],[-9.3867901,5.2455431],[-9.3862751,5.2455057],[-9.3858486,5.2454843],[-9.3856448,5.2454817],[-9.3854544,5.2454363],[-9.385154,5.2453615],[-9.3847073,5.2452366],[-9.3840516,5.2450303],[-9.3835339,5.2448994],[-9.3831477,5.2447952],[-9.3829384,5.2447017],[-9.38274,5.2446083],[-9.3817883,5.2441486],[-9.3806365,5.2435582],[-9.37939,5.2430484],[-9.3786764,5.242605],[-9.3775017,5.2418999],[-9.3769491,5.241542],[-9.3763644,5.2410452],[-9.3759907,5.2407348],[-9.3757153,5.2404736],[-9.3755865,5.240308],[-9.375477,5.2401628],[-9.3752996,5.239828],[-9.375379,5.2396698],[-9.3751735,5.2394372],[-9.3747979,5.2389885],[-9.3743956,5.2382727],[-9.374224,5.2379361],[-9.3741328,5.2377331],[-9.3740791,5.2375194],[-9.3739933,5.2373859],[-9.37402,5.2372376],[-9.3739593,5.2371353],[-9.3739173,5.237047],[-9.373656,5.2367739],[-9.373581,5.2365261],[-9.3732915,5.2356658],[-9.3731747,5.2348147],[-9.3732027,5.2340241],[-9.3732448,5.2335219],[-9.3733802,5.2329685],[-9.3735063,5.232615],[-9.3737491,5.2323313],[-9.3739665,5.2320973],[-9.3741703,5.2318729],[-9.3743795,5.2315524],[-9.3745995,5.2314883],[-9.3749267,5.2311571],[-9.3753558,5.2309915],[-9.3756455,5.2307885],[-9.3759996,5.2308419],[-9.3765838,5.2312152],[-9.3769995,5.2313036],[-9.3771368,5.2311945],[-9.3771676,5.2307501],[-9.3771069,5.2302246],[-9.3771956,5.2299782],[-9.3772388,5.2298215],[-9.3770564,5.2295865],[-9.3769808,5.229341],[-9.3770462,5.2292899],[-9.3766492,5.2287969],[-9.3761589,5.2279505],[-9.3757099,5.227487],[-9.3753398,5.2269902],[-9.3748784,5.226878],[-9.3737627,5.2265629],[-9.3726361,5.2262156],[-9.3713164,5.2257829],[-9.3702114,5.2253716],[-9.3699945,5.2251369],[-9.369852,5.225051],[-9.3695301,5.2249282],[-9.3694603,5.2249656],[-9.3692458,5.2249068],[-9.3689776,5.2248053],[-9.3685484,5.2246183],[-9.3682694,5.2244367],[-9.3677759,5.224239],[-9.3674916,5.2239345],[-9.3672395,5.2237315],[-9.3668962,5.2235125],[-9.3663544,5.2231813],[-9.366011,5.2228821],[-9.3656088,5.2222946],[-9.365539,5.2219793],[-9.3653942,5.2217123],[-9.3651475,5.2214986],[-9.3650402,5.2212903],[-9.364965,5.2209643],[-9.3649061,5.2206706],[-9.3649439,5.2203725],[-9.3648153,5.2200734],[-9.364547,5.2199986],[-9.3642788,5.2199132],[-9.3641579,5.2198421],[-9.364075,5.2197315],[-9.3638922,5.2196289],[-9.3636721,5.2193937],[-9.3633449,5.2189236],[-9.3631948,5.2186833],[-9.3630714,5.218507],[-9.3628728,5.2183466],[-9.3626851,5.2181383],[-9.3625081,5.2180314],[-9.3622452,5.2179246],[-9.3619771,5.2179461],[-9.3615962,5.2179194],[-9.361328,5.2178553],[-9.3610008,5.2178018],[-9.3605877,5.2177377],[-9.3602176,5.2176523],[-9.3595147,5.2173797],[-9.3588951,5.2168455],[-9.3587718,5.216684],[-9.3586726,5.2165237],[-9.3586364,5.2164275],[-9.3586163,5.2163167],[-9.3586002,5.2162165],[-9.358576,5.2160963],[-9.3585338,5.2159902],[-9.3584795,5.215916],[-9.358403,5.2158239],[-9.3582998,5.2157611],[-9.3582139,5.2157344],[-9.3581388,5.2157277],[-9.3580718,5.2157357],[-9.3579657,5.2157303],[-9.3578619,5.2157023],[-9.3577472,5.2156436],[-9.3576708,5.2155741],[-9.3575648,5.2154646],[-9.3574857,5.2153311],[-9.3574092,5.2151867],[-9.357367,5.2151354],[-9.3573154,5.2150933],[-9.3572316,5.2150486],[-9.3570095,5.2149437],[-9.3566502,5.2148089],[-9.3564263,5.2147207],[-9.3560976,5.2146124],[-9.3556309,5.2144655],[-9.3541825,5.2139447],[-9.3535241,5.2136602],[-9.3529783,5.2134064],[-9.3526456,5.2131941],[-9.3524499,5.2130872],[-9.3521696,5.2129831],[-9.3519228,5.2129069],[-9.3516573,5.2128615],[-9.3515097,5.2128402],[-9.351275,5.2127774],[-9.3509572,5.2126665],[-9.3506461,5.2125303],[-9.3496013,5.2119841],[-9.3492674,5.2117824],[-9.3488261,5.2114311],[-9.3486425,5.2112576],[-9.3484614,5.2110438],[-9.3482817,5.2107767],[-9.3478686,5.2100555],[-9.3476003,5.2096014],[-9.3474985,5.209381],[-9.3474073,5.20917],[-9.3473187,5.2088682],[-9.3472625,5.2087254],[-9.3471873,5.2085838],[-9.3471257,5.2084729],[-9.3470801,5.2083847],[-9.3469539,5.2081777],[-9.3467125,5.2076835],[-9.3463853,5.2070819],[-9.3463432,5.2070052],[-9.3463043,5.2069538],[-9.3462579,5.2068997],[-9.3460904,5.2067854],[-9.3458864,5.2066426],[-9.3457577,5.2065411],[-9.3455243,5.2063],[-9.3452857,5.2060596],[-9.345122,5.2059487],[-9.3448928,5.2058458],[-9.3446869,5.2057663],[-9.3442395,5.2055453],[-9.3432941,5.2049256],[-9.3430742,5.2048269],[-9.342747,5.2047212],[-9.3420669,5.2045049],[-9.3414863,5.2043654],[-9.3410049,5.2042405],[-9.3407607,5.2041843],[-9.3404993,5.2041002],[-9.3400822,5.2039466],[-9.3395297,5.2036768],[-9.3388858,5.2033777],[-9.337817,5.2028515],[-9.3366758,5.2023586],[-9.3353494,5.2018885],[-9.3348572,5.2017309],[-9.334184,5.2014918],[-9.3334101,5.2012715],[-9.3329448,5.2011058],[-9.3319578,5.2007346],[-9.3310753,5.2004113],[-9.3302143,5.2000494],[-9.3295028,5.1997329],[-9.3287686,5.1993869],[-9.3269433,5.1985296],[-9.3257538,5.1979552],[-9.3243925,5.1973288],[-9.3241967,5.1972233],[-9.3239298,5.1970577],[-9.3236697,5.1968653],[-9.3233505,5.1966917],[-9.3229307,5.1965181],[-9.3225163,5.1963364],[-9.3220711,5.1961428],[-9.3214501,5.1958823],[-9.3211082,5.1957515],[-9.320789,5.1956406],[-9.3206067,5.1955712],[-9.3204658,5.1955084],[-9.3203424,5.1954469],[-9.3198744,5.1951719],[-9.3193768,5.194906],[-9.3188041,5.1946616],[-9.3180223,5.194309],[-9.3169025,5.1938215],[-9.3162775,5.1934996],[-9.3158081,5.1932672],[-9.3148398,5.1928505],[-9.3138917,5.1924565],[-9.3133365,5.1922762],[-9.3129757,5.1921707],[-9.3126337,5.1920772],[-9.312399,5.1919837],[-9.3120612,5.1918008],[-9.3110713,5.1913173],[-9.3097195,5.1906643],[-9.3091321,5.1903664],[-9.308542,5.1900993],[-9.3081551,5.1899063],[-9.3076837,5.1896185],[-9.3072411,5.1893753],[-9.307044,5.1892631],[-9.3066417,5.1890816],[-9.3062769,5.188948],[-9.30587,5.1888143],[-9.3055554,5.1887023],[-9.3051919,5.1885607],[-9.3049882,5.1884657],[-9.3047173,5.1883268],[-9.3043578,5.188164],[-9.3039997,5.1879996],[-9.3034136,5.1876778],[-9.30267,5.1872817],[-9.3015294,5.1867001],[-9.3009916,5.1864103],[-9.3004102,5.1861097],[-9.2997028,5.1856903],[-9.2990255,5.1852723],[-9.2980237,5.1846099],[-9.297148,5.1840115],[-9.2968906,5.1838459],[-9.296755,5.1837403],[-9.2965298,5.1835534],[-9.2960537,5.183154],[-9.2950988,5.1823393],[-9.2937107,5.1812093],[-9.2928913,5.1805308],[-9.29243,5.1800874],[-9.2918614,5.1796012],[-9.2905846,5.1784633],[-9.289839,5.1776726],[-9.2892596,5.1769969],[-9.2885555,5.1761954],[-9.2876342,5.1750522],[-9.2869569,5.1741358],[-9.2863642,5.1732077],[-9.2856815,5.1720068],[-9.2849547,5.1705925],[-9.2844531,5.1693609],[-9.2840239,5.1681509],[-9.2837477,5.1671798],[-9.2835478,5.166269],[-9.2833842,5.1652658],[-9.2833078,5.1648051],[-9.2832541,5.1642161],[-9.2832193,5.1634106],[-9.2832904,5.1621618],[-9.2833292,5.1618292],[-9.283407,5.1614152],[-9.2835411,5.1609102],[-9.2836511,5.1606325],[-9.2838013,5.1603814],[-9.2840441,5.1600901],[-9.2843565,5.1597055],[-9.2845564,5.1594117],[-9.284728,5.1591485],[-9.2848957,5.158852],[-9.2851438,5.1583685],[-9.2853597,5.1580533],[-9.2855072,5.1578543],[-9.2856038,5.1577487],[-9.2856614,5.1576713],[-9.2857151,5.1575537],[-9.2857419,5.1574028],[-9.285754,5.1571637],[-9.2857513,5.1569153],[-9.2857553,5.156735],[-9.2857741,5.1565854],[-9.2858318,5.1564144],[-9.2860208,5.1560231],[-9.2861415,5.1557452],[-9.2861677,5.1557078],[-9.2861959,5.1556838],[-9.286222,5.1556677],[-9.2868456,5.1559757],[-9.2872439,5.1561672],[-9.2872728,5.1561847],[-9.287313,5.1562034],[-9.2873948,5.1562314],[-9.2874464,5.1562414],[-9.2874746,5.1562354],[-9.2874961,5.1562154],[-9.2875404,5.156166],[-9.2877188,5.155876],[-9.287893,5.1556651],[-9.2880541,5.1554566],[-9.2883183,5.1551294],[-9.2887139,5.1546138],[-9.2891551,5.1540355],[-9.2894998,5.1536361],[-9.2896674,5.1534491],[-9.2900617,5.1531018],[-9.2903138,5.1529148],[-9.290755,5.152625],[-9.2912741,5.1523098],[-9.2916615,5.1520975],[-9.2921216,5.151901],[-9.2926554,5.1517555],[-9.2930563,5.1516955],[-9.2934252,5.151674],[-9.2938745,5.1516673],[-9.2942767,5.1517142],[-9.2946134,5.1517929],[-9.294903,5.1518865],[-9.2951189,5.1519906],[-9.295343,5.1521308],[-9.2954622,5.1522337],[-9.2955601,5.152358],[-9.2956607,5.1525276],[-9.2957486,5.1527278],[-9.2957895,5.1528695],[-9.2958069,5.1530111],[-9.2957854,5.15315],[-9.29577,5.1532929],[-9.29577,5.1533624],[-9.2957895,5.1534171],[-9.2958243,5.1534586],[-9.2958967,5.153508],[-9.2959718,5.1535467],[-9.296051,5.1535521],[-9.2962401,5.1535347],[-9.2963971,5.1535212],[-9.2965768,5.1535159],[-9.2966203,5.1535026],[-9.2966665,5.1534739],[-9.2967148,5.1534345],[-9.2968395,5.1533449],[-9.2969656,5.1533182],[-9.2970622,5.1533183],[-9.2972218,5.153345],[-9.29726,5.1533402],[-9.2972956,5.1533262],[-9.2973344,5.1532995],[-9.2973438,5.1532608],[-9.2973371,5.1532087],[-9.2973062,5.1531619],[-9.297215,5.1530898],[-9.2971869,5.1530257],[-9.2971762,5.1529469],[-9.2971976,5.1528467],[-9.2972432,5.152748],[-9.2972928,5.1526932],[-9.2974283,5.1525823],[-9.2976549,5.1525049],[-9.2977019,5.1524835],[-9.297732,5.1524661],[-9.2977595,5.1524368],[-9.2978038,5.1522685],[-9.2978333,5.1520601],[-9.297848,5.1519065],[-9.2978541,5.1518437],[-9.2978735,5.1518117],[-9.2979117,5.1517843],[-9.2979896,5.1517388],[-9.2980358,5.1517128],[-9.2980982,5.1516701],[-9.2981364,5.1516173],[-9.2981806,5.1515218],[-9.2981967,5.1514337],[-9.2981947,5.1513936],[-9.2981847,5.1513695],[-9.2981525,5.1513468],[-9.2980837,5.1513261],[-9.2980036,5.1513201],[-9.2979218,5.1513148],[-9.2978522,5.1513147],[-9.2977221,5.1513467],[-9.2976081,5.1514055],[-9.2975148,5.151425],[-9.2974625,5.151429],[-9.297378,5.1514169],[-9.2973022,5.1513962],[-9.2971976,5.1513468],[-9.2969656,5.1512373],[-9.2965687,5.1510275],[-9.2959921,5.1507243],[-9.2953832,5.150361],[-9.2952208,5.1502289],[-9.2951122,5.1500726],[-9.2950901,5.149957],[-9.2950921,5.1498955],[-9.2950954,5.1498581],[-9.2951082,5.1498321],[-9.2951337,5.149808],[-9.2951839,5.1497887],[-9.2952128,5.1497626],[-9.2952316,5.149738],[-9.2952396,5.1497172],[-9.2952366,5.1496995],[-9.2952262,5.1496911],[-9.2951987,5.1496841],[-9.2951182,5.1496841],[-9.2949311,5.1497319],[-9.2948346,5.1497506],[-9.2947742,5.1497466],[-9.2946897,5.1497173],[-9.2945127,5.1496438],[-9.2943075,5.1495624],[-9.2941171,5.1494822],[-9.2938919,5.1493913],[-9.2935204,5.1491789],[-9.293295,5.1490481],[-9.2931783,5.1489259],[-9.2931555,5.1488744],[-9.2931495,5.1487957],[-9.2931609,5.1487108],[-9.2931864,5.1486607],[-9.2932414,5.148618],[-9.293354,5.1485873],[-9.2933855,5.1485738],[-9.2933983,5.1485458],[-9.2934023,5.1485104],[-9.2934009,5.1484817],[-9.2933849,5.1484573],[-9.293352,5.1484366],[-9.2933238,5.1484286],[-9.2932286,5.1484176],[-9.2930891,5.1484229],[-9.2929275,5.1484284],[-9.2927827,5.1484336],[-9.2926432,5.148411],[-9.2925413,5.1483815],[-9.2923106,5.1482774],[-9.2919606,5.1481492],[-9.2915931,5.1480009],[-9.2908717,5.1477991],[-9.2906275,5.1477084],[-9.2904384,5.1476203],[-9.2903124,5.1475066],[-9.2901998,5.1473677],[-9.2901059,5.1472369],[-9.2900361,5.1471473],[-9.2899892,5.1471139],[-9.2899181,5.1470779],[-9.2896821,5.1469938],[-9.2893724,5.1468989],[-9.2884469,5.1465704],[-9.2871327,5.146012],[-9.2855997,5.1453723],[-9.2846745,5.1450236],[-9.2839529,5.1447618],[-9.2830826,5.1443824],[-9.2814907,5.1437493],[-9.2796534,5.1429746],[-9.278437,5.1424697],[-9.2778603,5.1422493],[-9.2774431,5.142069],[-9.2772071,5.1419488],[-9.2769536,5.1418366],[-9.2766197,5.141719],[-9.2763341,5.1416429],[-9.2758513,5.141536],[-9.2754449,5.1414318],[-9.2752558,5.1413651],[-9.2746886,5.141138],[-9.274368,5.1410138],[-9.2742151,5.140935],[-9.2741105,5.1408628],[-9.2739818,5.1407587],[-9.2738503,5.1406758],[-9.2737256,5.1406157],[-9.273499,5.1405516],[-9.2729197,5.1403833],[-9.2720479,5.1400828],[-9.2715464,5.1399078],[-9.2706706,5.139666],[-9.2701717,5.1395285],[-9.2700751,5.1394937],[-9.2699652,5.1394416],[-9.2698646,5.1393508],[-9.2697532,5.139276],[-9.2696124,5.1392186],[-9.2694139,5.1391692],[-9.268765,5.1389768],[-9.2680971,5.1388179],[-9.2676504,5.1386843],[-9.2665012,5.138321],[-9.2658548,5.1380979],[-9.2656079,5.137987],[-9.2652404,5.1378015],[-9.2646035,5.1375463],[-9.2639383,5.1372764],[-9.2635211,5.1370788],[-9.2633159,5.1369732],[-9.2630049,5.1367943],[-9.2621773,5.1364043],[-9.2616102,5.1361491],[-9.2612171,5.1359154],[-9.2610213,5.1357657],[-9.2608337,5.1356108],[-9.2601745,5.1350718],[-9.2596052,5.1345462],[-9.2593248,5.1342618],[-9.2590767,5.1339533],[-9.2589694,5.1338049],[-9.2588541,5.1336247],[-9.2587844,5.133487],[-9.2586007,5.1331905],[-9.2584009,5.132942],[-9.2583163,5.1328565],[-9.2582104,5.132751],[-9.2580387,5.1325468],[-9.2579328,5.1323784],[-9.2578591,5.1322421],[-9.25767,5.1319055],[-9.2574366,5.1315262],[-9.2573453,5.1313458],[-9.2572234,5.1310894],[-9.2571509,5.1309292],[-9.2571147,5.1308771],[-9.2570463,5.1307876],[-9.2568841,5.1306539],[-9.2566118,5.1305271],[-9.2563918,5.1304522],[-9.2562,5.1304123],[-9.2560124,5.1303734],[-9.2558245,5.1303521],[-9.255724,5.1303173],[-9.2556328,5.1302759],[-9.2555389,5.1302065],[-9.2554745,5.1301103],[-9.2554168,5.1299607],[-9.2553739,5.1298592],[-9.2553471,5.1298071],[-9.2553109,5.1297697],[-9.2552653,5.1297496],[-9.2552224,5.1297416],[-9.2551728,5.129755],[-9.2551104,5.1297844],[-9.2550514,5.1298264],[-9.2550159,5.1298745],[-9.2549535,5.1300215],[-9.2549273,5.1300642],[-9.2548871,5.1301049],[-9.2548321,5.1301403],[-9.2547993,5.1301463],[-9.2547563,5.1301437],[-9.2546726,5.1301156],[-9.2543466,5.1299901],[-9.2537552,5.1297791],[-9.2535125,5.1296869],[-9.2532872,5.1296014],[-9.2531343,5.1295653],[-9.2528715,5.1295159],[-9.2526113,5.1294558],[-9.2522867,5.1293343],[-9.2518401,5.1290672],[-9.2513306,5.1287866],[-9.2509403,5.128653],[-9.2506895,5.1285074],[-9.2505647,5.1284227],[-9.2504656,5.1283444],[-9.2503033,5.1281561],[-9.2502509,5.128056],[-9.2501986,5.1279518],[-9.2501577,5.1279017],[-9.2501282,5.1278797],[-9.2500786,5.127869],[-9.2499726,5.1278637],[-9.2498245,5.1278536],[-9.2497379,5.1278423],[-9.2496246,5.1278056],[-9.2493954,5.1277367],[-9.2491137,5.1276433],[-9.2486953,5.1275483],[-9.2483895,5.1274776],[-9.2482761,5.1274456],[-9.2481011,5.1273922],[-9.2476761,5.1272518],[-9.2472401,5.1271357],[-9.2467615,5.1270314],[-9.2459809,5.1268818],[-9.2451562,5.1267589],[-9.2445686,5.1266762],[-9.2440404,5.1266093],[-9.2435173,5.1265505],[-9.243021,5.1264758],[-9.2427421,5.1264064],[-9.2424443,5.1263182],[-9.2419429,5.1261338],[-9.2411114,5.1258319],[-9.2401216,5.1254285],[-9.2397219,5.1252844],[-9.2393492,5.1251186],[-9.2392109,5.1250413],[-9.2390433,5.124913],[-9.2387068,5.1247126],[-9.2382441,5.1244561],[-9.2379583,5.1242999],[-9.2376808,5.1241542],[-9.2374099,5.124026],[-9.2371417,5.1238924],[-9.2368841,5.123775],[-9.2366857,5.1236587],[-9.2365489,5.1235478],[-9.2363222,5.1233355],[-9.2361613,5.1231352],[-9.2359937,5.1228439],[-9.2358797,5.1226448],[-9.2358194,5.1225874],[-9.2357522,5.1225661],[-9.2356933,5.1225687],[-9.2354761,5.1226114],[-9.2351837,5.1227049],[-9.2349878,5.1227331],[-9.2347866,5.1227451],[-9.2346418,5.1227344],[-9.2344836,5.1226956],[-9.2343239,5.1226115],[-9.2341992,5.1225007],[-9.2341121,5.1224419],[-9.2340007,5.1223978],[-9.2339095,5.1223738],[-9.2337701,5.1223537],[-9.2336185,5.1223043],[-9.2334455,5.1222322],[-9.2332725,5.1221066],[-9.2331412,5.122005],[-9.2329507,5.1218969],[-9.2327053,5.1218193],[-9.232433,5.1217406],[-9.232327,5.1216925],[-9.2321393,5.1215777],[-9.2318563,5.1213933],[-9.2315493,5.1212102],[-9.2313079,5.121066],[-9.2306025,5.1207387],[-9.2295041,5.1202952],[-9.2284353,5.1199092],[-9.2280047,5.1197464],[-9.2277941,5.1196969],[-9.227711,5.1196889],[-9.2275956,5.1196956],[-9.2274535,5.1197036],[-9.2273381,5.1197116],[-9.2272536,5.1197156],[-9.2271853,5.1197036],[-9.2270538,5.1196649],[-9.226284,5.1193617],[-9.2258603,5.1191986],[-9.2255102,5.1190371],[-9.2252474,5.1189102],[-9.2249739,5.1187899],[-9.2245352,5.1185976],[-9.2241476,5.1183785],[-9.2236878,5.1181393],[-9.2234302,5.1179858],[-9.223225,5.1178937],[-9.2230774,5.1178255],[-9.2225532,5.1176197],[-9.2218424,5.1173739],[-9.2208446,5.1170734],[-9.2206608,5.1170134],[-9.2204663,5.1169613],[-9.220245,5.1169172],[-9.2199956,5.1168665],[-9.2198053,5.1168343],[-9.2197213,5.1168003],[-9.2196415,5.1167556],[-9.2195061,5.1166587],[-9.2194069,5.1165952],[-9.2192633,5.1165205],[-9.2191132,5.116463],[-9.2189817,5.1164404],[-9.2188584,5.1164322],[-9.2187135,5.116419],[-9.2185271,5.116403],[-9.2182925,5.1163681],[-9.2180766,5.116324],[-9.2176984,5.1162532],[-9.2173509,5.1161959],[-9.2171605,5.1161558],[-9.2169608,5.1160996],[-9.2166751,5.1160128],[-9.2164604,5.1159394],[-9.2163572,5.1159087],[-9.2162941,5.1158767],[-9.2162801,5.1158653],[-9.2162633,5.1158459],[-9.2162191,5.1157911],[-9.2160755,5.1156162],[-9.2159522,5.1154906],[-9.2158074,5.1154077],[-9.2156531,5.1153343],[-9.2153581,5.1152342],[-9.2150658,5.1151512],[-9.2148095,5.1150645],[-9.2144234,5.1148881],[-9.2138762,5.1146543],[-9.2130796,5.1143591],[-9.2127033,5.114223],[-9.212283,5.1140826],[-9.2119315,5.1139585],[-9.2115078,5.1137941],[-9.211084,5.1135645],[-9.210754,5.1133828],[-9.2103518,5.113185],[-9.2099038,5.1129647],[-9.2094546,5.1127936],[-9.2091018,5.1126495],[-9.2088872,5.1125559],[-9.2086338,5.1124464],[-9.2081926,5.1122419],[-9.2075784,5.1119721],[-9.2072337,5.1118265],[-9.2068596,5.1116435],[-9.2066128,5.1115126],[-9.2063124,5.1113523],[-9.2059924,5.1111734],[-9.2053227,5.1107045],[-9.2051671,5.1105362],[-9.2050021,5.1103785],[-9.2048546,5.1102236],[-9.2046855,5.11003],[-9.204404,5.1096879],[-9.2042095,5.1093113],[-9.2040298,5.108984],[-9.2037764,5.1084777],[-9.2036758,5.1083281],[-9.2035926,5.1082253],[-9.2035014,5.1081652],[-9.2033927,5.1081131],[-9.2032681,5.108065],[-9.2031098,5.1080236],[-9.2029838,5.1079969],[-9.2028403,5.1079434],[-9.202733,5.1078913],[-9.2025062,5.1077712],[-9.2021094,5.1074639],[-9.2018961,5.1072168],[-9.2016574,5.1069309],[-9.2015247,5.1066985],[-9.2013999,5.1064781],[-9.2012456,5.1061977],[-9.201129,5.1057988],[-9.201349,5.1055712],[-9.2016199,5.1053747],[-9.202024,5.1051853],[-9.2021473,5.1048599],[-9.2021528,5.1045169],[-9.2021583,5.1042555],[-9.2018995,5.1040515],[-9.2016399,5.1037144],[-9.2015541,5.1035755],[-9.2015702,5.1034045],[-9.2016882,5.1033244],[-9.2019242,5.1032175],[-9.2019029,5.102977],[-9.2016185,5.1028701],[-9.2012967,5.1024213],[-9.2009963,5.1020099],[-9.2007333,5.1017375],[-9.2005563,5.1016253],[-9.2004544,5.101497],[-9.2003793,5.1013154],[-9.2003578,5.1011978],[-9.2004008,5.1008878],[-9.2001541,5.1007649],[-9.1998858,5.1004871],[-9.1994299,5.1001558],[-9.199049,5.1001344],[-9.1985715,5.1000008],[-9.198035,5.0997284],[-9.1972787,5.0992261],[-9.1963506,5.0988575],[-9.1955728,5.0983712],[-9.1946822,5.0979171],[-9.1936577,5.0974682],[-9.1932929,5.0972064],[-9.1930139,5.0970087],[-9.1927511,5.0968271],[-9.1921825,5.0964369],[-9.1916622,5.0960736],[-9.1913295,5.0959989],[-9.1910666,5.0958653],[-9.1909593,5.0956836],[-9.1909057,5.0954325],[-9.190954,5.0952508],[-9.1908306,5.0950692],[-9.1906911,5.0950798],[-9.190305,5.0952988],[-9.1898973,5.0952454],[-9.189291,5.0950905],[-9.1885723,5.0947645],[-9.1876389,5.0942462],[-9.18692,5.0938294],[-9.1856862,5.0931455],[-9.18449,5.0924242],[-9.183122,5.0916547],[-9.1817219,5.0909281],[-9.1804827,5.0901853],[-9.1792595,5.0893572],[-9.1785568,5.0886519],[-9.1777791,5.0881389],[-9.1769421,5.0876955],[-9.1760088,5.0873213],[-9.1754348,5.0870114],[-9.1750271,5.0865947],[-9.174555,5.0861298],[-9.1741044,5.085729],[-9.1732837,5.0852375],[-9.1730154,5.084965],[-9.1726078,5.0844947],[-9.1724199,5.0842758],[-9.1722751,5.0841208],[-9.1721517,5.0838857],[-9.172039,5.0837895],[-9.1715993,5.0833726],[-9.1714705,5.0829291],[-9.1712987,5.0828438],[-9.1711915,5.0826995],[-9.1711432,5.0825659],[-9.1711164,5.0823148],[-9.1711326,5.0819567],[-9.1712101,5.0816499],[-9.1713631,5.0816148],[-9.1714704,5.0813904],[-9.1712101,5.0811339],[-9.1709716,5.0810055],[-9.1707034,5.0809628],[-9.1703386,5.0808987],[-9.1700811,5.0808078],[-9.1693998,5.0804979],[-9.1690351,5.0803537],[-9.1688419,5.0802682],[-9.1684342,5.0801987],[-9.1680372,5.0801561],[-9.1678011,5.0800973],[-9.1676831,5.0800706],[-9.1675545,5.0797499],[-9.1672999,5.0795309],[-9.1669483,5.0793919],[-9.1666907,5.0794721],[-9.1663903,5.0794668],[-9.1663152,5.0794026],[-9.1659182,5.079221],[-9.1657788,5.0786706],[-9.1655321,5.0785369],[-9.1652049,5.0784461],[-9.1650117,5.078414],[-9.1647686,5.0784083],[-9.1646028,5.0783121],[-9.1643839,5.078264],[-9.1641742,5.0781289],[-9.1635855,5.0777544],[-9.1631019,5.0778477],[-9.1627586,5.0777515],[-9.1623884,5.0776073],[-9.1621417,5.0774203],[-9.161895,5.0770354],[-9.1616375,5.0765812],[-9.1613638,5.0762607],[-9.160983,5.0762928],[-9.1605915,5.0761645],[-9.1600818,5.0759347],[-9.1595132,5.0758545],[-9.1589123,5.0756623],[-9.1582365,5.0753683],[-9.1574961,5.0750959],[-9.1569007,5.0749195],[-9.1560424,5.0745187],[-9.15527,5.0743477],[-9.1546852,5.0740378],[-9.1540737,5.0738187],[-9.1537035,5.0736425],[-9.1533655,5.0735837],[-9.1532797,5.0735784],[-9.1524966,5.0733645],[-9.1517509,5.0731187],[-9.1510267,5.0730012],[-9.1505225,5.0727554],[-9.1499324,5.0724027],[-9.1497821,5.0722105],[-9.149648,5.0720448],[-9.1495299,5.0719166],[-9.1491063,5.0718203],[-9.1488755,5.0717937],[-9.1485965,5.0717028],[-9.148264,5.0715211],[-9.1474808,5.071334],[-9.1468961,5.071147],[-9.1463382,5.0709066],[-9.1458608,5.0707516],[-9.1453672,5.0705914],[-9.1453296,5.0704044],[-9.1453941,5.0700249],[-9.144981,5.0699928],[-9.1442568,5.069918],[-9.1429694,5.069544],[-9.1420413,5.0692127],[-9.1414351,5.0690738],[-9.1405446,5.0687264],[-9.1398741,5.0685234],[-9.1388119,5.0682242],[-9.1375567,5.06777],[-9.1364999,5.067428],[-9.1354002,5.0670486],[-9.1340537,5.0666372],[-9.1323264,5.0661349],[-9.1311194,5.0656753],[-9.1296441,5.0650662],[-9.128346,5.0644624],[-9.1272086,5.0638533],[-9.1265596,5.063415],[-9.1258998,5.0629074],[-9.125417,5.0624906],[-9.1247893,5.0620418],[-9.1243226,5.0617158],[-9.124033,5.0614914],[-9.1235502,5.0611815],[-9.1232766,5.0609089],[-9.1230674,5.0606792],[-9.1227455,5.0604815],[-9.1224129,5.0601608],[-9.1220642,5.0597815],[-9.1218121,5.0594234],[-9.1216351,5.0589532],[-9.1213776,5.0584776],[-9.1211737,5.0578685],[-9.1209848,5.0572776],[-9.1206748,5.0564418],[-9.1209538,5.0559074],[-9.1211538,5.0557113],[-9.121297,5.0555708],[-9.1216886,5.0553089],[-9.121989,5.0551167],[-9.122166,5.0549884],[-9.1223055,5.0548121],[-9.1223484,5.0546999],[-9.1223431,5.0545609],[-9.1221553,5.0541013],[-9.1221499,5.0537379],[-9.1220641,5.0533478],[-9.1222519,5.0528723],[-9.1223913,5.0524182],[-9.1224665,5.052151],[-9.1226542,5.0520067],[-9.1227722,5.0518838],[-9.1229117,5.0512638],[-9.1232765,5.0505157],[-9.1240275,5.0499333],[-9.1242635,5.0500082],[-9.1243011,5.0501258],[-9.1244245,5.0502968],[-9.1245747,5.0503021],[-9.1246873,5.0500777],[-9.1248804,5.0498586],[-9.1249663,5.0495861],[-9.1248965,5.0492387],[-9.1248107,5.0490143],[-9.1246229,5.0488379],[-9.1243279,5.0486349],[-9.1239631,5.0484959],[-9.1234428,5.0484585],[-9.1232926,5.0482928],[-9.1231424,5.0480791],[-9.1230112,5.0479401],[-9.1228301,5.0478239],[-9.1225945,5.0477165],[-9.1222683,5.0475867],[-9.1218289,5.0474356],[-9.1213882,5.0473097],[-9.1212596,5.0471921],[-9.1211254,5.0469997],[-9.121045,5.0468929],[-9.1208518,5.0464172],[-9.1205515,5.0461875],[-9.120412,5.0460486],[-9.1200686,5.0457279],[-9.1194409,5.0453378],[-9.118824,5.0449263],[-9.1178745,5.0446004],[-9.1173917,5.0443706],[-9.1168124,5.0439217],[-9.1164315,5.0436973],[-9.1161847,5.0430828],[-9.1163939,5.0425217],[-9.1162062,5.0423453],[-9.1154981,5.0420995],[-9.115026,5.0420782],[-9.1145968,5.0418965],[-9.1140121,5.0418003],[-9.1132772,5.0415491],[-9.1124189,5.041314],[-9.1111851,5.0408812],[-9.1094685,5.0402506],[-9.1027717,5.0380439],[-9.099921,5.0370393],[-9.0969455,5.0357717],[-9.0926783,5.0342182],[-9.0904969,5.033389],[-9.0882868,5.0322549],[-9.0858183,5.0309491],[-9.0834455,5.029672],[-9.0810815,5.0284269],[-9.0781677,5.0272053],[-9.0763343,5.0264707],[-9.0742912,5.0256418],[-9.0724916,5.0249139],[-9.0716256,5.0246309],[-9.0701914,5.0239839],[-9.0674311,5.0230134],[-9.0660916,5.0225349],[-9.0641973,5.0216723],[-9.0622759,5.020621],[-9.0611123,5.0200212],[-9.0595089,5.0190642],[-9.0567892,5.0176556],[-9.0548814,5.0166043],[-9.0532712,5.0156742],[-9.051837,5.0148655],[-9.0511905,5.0144497],[-9.0506531,5.0141039],[-9.0491444,5.0132211],[-9.0480281,5.0127358],[-9.0469592,5.0119271],[-9.0455791,5.0111723],[-9.0441313,5.0101748],[-9.0426091,5.0090696],[-9.0409854,5.0079104],[-9.0405254,5.0074521],[-9.0397406,5.0065018],[-9.0391387,5.0055268],[-9.0388998,5.0050851],[-9.038799,5.0044069],[-9.0388875,5.0042759],[-9.0390532,5.004269],[-9.0391321,5.0041547],[-9.0391007,5.003789],[-9.0390048,5.0035796],[-9.038936,5.0034112],[-9.038979,5.0032063],[-9.0388609,5.003102],[-9.0387577,5.0026941],[-9.0385738,5.0024433],[-9.0382592,5.0014526],[-9.0377006,4.9993863],[-9.0373869,4.9981409],[-9.0373008,4.9973784],[-9.0373857,4.996552],[-9.037499,4.9960729],[-9.0376932,4.9954007],[-9.0380091,4.994592],[-9.0380438,4.9943134],[-9.0388958,4.9937166],[-9.0400221,4.9929275],[-9.0400812,4.9935417],[-9.0396939,4.9936879],[-9.039587,4.9938605],[-9.0396202,4.9940038],[-9.0397824,4.9940332],[-9.0399005,4.9941434],[-9.0401586,4.9941618],[-9.0403357,4.9942316],[-9.0404463,4.9942022],[-9.0405053,4.9942904],[-9.040745,4.9942757],[-9.0411507,4.9940736],[-9.0411729,4.9939855],[-9.040911,4.9938458],[-9.0407377,4.993618],[-9.040745,4.9934711],[-9.040863,4.9933139],[-9.0413352,4.9934235],[-9.0414901,4.9932947],[-9.0415859,4.9931294],[-9.0416302,4.9927158],[-9.0417286,4.9924866],[-9.0419622,4.9925394],[-9.0421252,4.9923997],[-9.042112,4.9923032],[-9.0420359,4.9922035],[-9.0417335,4.9920235],[-9.0415417,4.9919794],[-9.0408491,4.9915881],[-9.0406149,4.991107],[-9.0404353,4.9904742],[-9.0405176,4.9896791],[-9.040491,4.9893674],[-9.0406762,4.9888419],[-9.0410487,4.9884453],[-9.0413501,4.9881232],[-9.0415764,4.9882073],[-9.0417091,4.9881261],[-9.041706,4.9876858],[-9.0423609,4.9873686],[-9.042999,4.9871004],[-9.0435374,4.9869938],[-9.0437587,4.987071],[-9.0442114,4.9873608],[-9.0442723,4.9873474],[-9.0443277,4.9873657],[-9.0446375,4.9879279],[-9.0448071,4.9895372],[-9.0449251,4.9895335],[-9.0449473,4.9897503],[-9.0450505,4.9898458],[-9.0451759,4.9898495],[-9.0452755,4.9897576],[-9.0451759,4.9889567],[-9.0449583,4.9875972],[-9.0447776,4.987307],[-9.0442539,4.9868036],[-9.0438666,4.9864913],[-9.0437973,4.9861966],[-9.0437895,4.9859361],[-9.0439183,4.9856756],[-9.0439198,4.9853833],[-9.0438165,4.9851925],[-9.0435757,4.9849741],[-9.0430617,4.9848451],[-9.0429167,4.9847934],[-9.0425244,4.9846532],[-9.042291,4.9846809],[-9.0421826,4.9846936],[-9.0419799,4.9846054],[-9.0418937,4.9844283],[-9.041561,4.9843613],[-9.040942,4.9842364],[-9.0396768,4.9838645],[-9.0389368,4.9836773],[-9.038027,4.9832099],[-9.0378205,4.9829649],[-9.0377724,4.9829078],[-9.0377205,4.982563],[-9.0377806,4.9823777],[-9.0377797,4.9814486],[-9.0380302,4.9810906],[-9.0380574,4.9808954],[-9.0376063,4.9807409],[-9.0374462,4.98073],[-9.0370923,4.9808934],[-9.0366056,4.9809913],[-9.0362361,4.9810935],[-9.0353349,4.9809473],[-9.0344267,4.9808001],[-9.0335003,4.9806499],[-9.0321055,4.9803934],[-9.0314163,4.9802624],[-9.0296727,4.9799498],[-9.0276236,4.9795998],[-9.0273178,4.9795436],[-9.0247335,4.9790734],[-9.0235172,4.9788556],[-9.0228814,4.9787246],[-9.0214177,4.9784335],[-9.0195836,4.9781087],[-9.0191156,4.9780179],[-9.0181352,4.9778442],[-9.0158674,4.9774193],[-9.0149708,4.9772607],[-9.0137377,4.97704],[-9.0137003,4.9770306],[-9.0136493,4.9770012],[-9.013601,4.9769532],[-9.013587,4.9769013],[-9.0135191,4.9767713],[-9.013524,4.9767374],[-9.0135889,4.9767152],[-9.013605,4.9766898],[-9.0136077,4.9766591],[-9.0135808,4.9766324],[-9.0135272,4.9766204],[-9.013471,4.9765911],[-9.0134065,4.9765415],[-9.0133663,4.9765176],[-9.0133033,4.9764962],[-9.0132026,4.9764681],[-9.0130122,4.9764307],[-9.0128955,4.9764093],[-9.0128405,4.9764013],[-9.0128177,4.9763919],[-9.0127963,4.9763693],[-9.0127937,4.9763546],[-9.0127937,4.9763252],[-9.0128124,4.9762825],[-9.0128058,4.9761662],[-9.0127736,4.9761153],[-9.0127334,4.9760966],[-9.0126878,4.9760833],[-9.0126368,4.9760806],[-9.0126086,4.9760913],[-9.0125963,4.976106],[-9.0125924,4.9761635],[-9.0125858,4.9761942],[-9.0125603,4.9762169],[-9.0125121,4.9762222],[-9.0123846,4.9761996],[-9.0123565,4.9761715],[-9.0123283,4.9761221],[-9.0123136,4.9760793],[-9.0122881,4.9760485],[-9.0122505,4.9760246],[-9.0121821,4.9759978],[-9.0121513,4.9759938],[-9.0121285,4.9760138],[-9.0120574,4.976106],[-9.012032,4.9761354],[-9.0120078,4.9761501],[-9.0119699,4.976155],[-9.0112468,4.9761978],[-9.0108464,4.9761716],[-9.0105702,4.9761474],[-9.0104092,4.976102],[-9.0103099,4.9760486],[-9.0102215,4.9759791],[-9.0101221,4.9758989],[-9.0099773,4.9756986],[-9.009921,4.9756318],[-9.0098861,4.9755757],[-9.0098432,4.9755222],[-9.0098083,4.975418],[-9.0097936,4.9753579],[-9.0097547,4.9753245],[-9.0097037,4.9753057],[-9.0096152,4.9752711],[-9.0095562,4.9752497],[-9.0095218,4.97521],[-9.0095106,4.9751761],[-9.0094931,4.9751455],[-9.0094529,4.9751321],[-9.009237,4.975092],[-9.0090734,4.975092],[-9.0088306,4.9751107],[-9.0087461,4.9751214],[-9.0087006,4.9751147],[-9.0086824,4.9751087],[-9.0086751,4.9750887],[-9.0086778,4.9750453],[-9.0086779,4.9750105],[-9.0086576,4.9749718],[-9.0085852,4.974929],[-9.0085332,4.9749105],[-9.0084618,4.974905],[-9.0084162,4.9749142],[-9.0083626,4.9749611],[-9.0083157,4.9749785],[-9.0082533,4.9749799],[-9.0081722,4.9749491],[-9.0081011,4.9749317],[-9.007979,4.9749023],[-9.0079267,4.9748729],[-9.0078878,4.9748222],[-9.0078972,4.9747807],[-9.0079334,4.9747407],[-9.0079147,4.9747139],[-9.0078637,4.9746658],[-9.0078141,4.9746391],[-9.0077573,4.9746306],[-9.0077055,4.9746404],[-9.0076625,4.9746351],[-9.0076451,4.974603],[-9.0076612,4.9745643],[-9.0076827,4.9745336],[-9.0076987,4.9744947],[-9.0076934,4.9744547],[-9.0076714,4.974398],[-9.007635,4.9743702],[-9.0076035,4.9743706],[-9.0075646,4.9743892],[-9.0075459,4.9743839],[-9.0075257,4.9743611],[-9.0074936,4.974317],[-9.0074506,4.9743038],[-9.007393,4.9743011],[-9.0072897,4.9742916],[-9.0070617,4.9742757],[-9.0069249,4.9742743],[-9.0066473,4.9743024],[-9.0064837,4.9743251],[-9.0062879,4.9743424],[-9.006245,4.9743437],[-9.0061873,4.974317],[-9.0061565,4.9742823],[-9.006075,4.9742414],[-9.0060157,4.9742115],[-9.0059258,4.9741981],[-9.0058204,4.974193],[-9.005679,4.9742036],[-9.0056187,4.9742198],[-9.005561,4.9742168],[-9.0055265,4.9742038],[-9.0054765,4.9741701],[-9.0054041,4.9741154],[-9.0053853,4.9740959],[-9.0053719,4.9740552],[-9.0053612,4.9740411],[-9.0053471,4.9740371],[-9.0053344,4.9740418],[-9.0052982,4.9740765],[-9.0052821,4.9740979],[-9.0052673,4.9741053],[-9.0052385,4.9741066],[-9.0052184,4.9741019],[-9.0052143,4.9740919],[-9.0052143,4.9740638],[-9.0052123,4.9740197],[-9.0052063,4.9739997],[-9.0051969,4.9739817],[-9.0051815,4.9739643],[-9.0051654,4.973955],[-9.0051433,4.9739469],[-9.0051158,4.9739516],[-9.0050816,4.9739503],[-9.0050652,4.973959],[-9.0050541,4.9739723],[-9.005041,4.9740101],[-9.0050145,4.9740585],[-9.0049931,4.9740899],[-9.0049837,4.9741012],[-9.0049709,4.9741086],[-9.0049629,4.9741116],[-9.0049595,4.9741069],[-9.0049582,4.9740999],[-9.0049612,4.9740896],[-9.0049847,4.9740445],[-9.00499,4.9740181],[-9.0049807,4.9740034],[-9.0049696,4.973996],[-9.0049441,4.9739977],[-9.0048932,4.9740044],[-9.0048006,4.9740552],[-9.004759,4.9740712],[-9.0047175,4.9740739],[-9.0046611,4.9740645],[-9.0046142,4.9740391],[-9.0044868,4.9739791],[-9.0043151,4.9739282],[-9.004093,4.9739075],[-9.0031055,4.9736598],[-9.00181,4.9733471],[-9.0010321,4.9731653],[-8.9974809,4.9724252],[-8.9953566,4.9719442],[-8.9927012,4.9712789],[-8.9894664,4.9703918],[-8.9875674,4.969892],[-8.9820206,4.9683315],[-8.9802128,4.9677917],[-8.9790729,4.9674978],[-8.9766696,4.9666802],[-8.9743629,4.9659506],[-8.9719725,4.9652641],[-8.9670915,4.9639317],[-8.9643288,4.9631422],[-8.9580612,4.9610847],[-8.9528757,4.9595134],[-8.9505422,4.9588828],[-8.9489168,4.9583964],[-8.9473343,4.9580009],[-8.9462292,4.9576268],[-8.9435631,4.9568198],[-8.9415729,4.9562373],[-8.9396283,4.9557617],[-8.9367101,4.9549707],[-8.9357391,4.9547168],[-8.9337409,4.9541904],[-8.9329737,4.9540222],[-8.9327431,4.9539554],[-8.9325178,4.953851],[-8.932381,4.9537924],[-8.9322388,4.9537603],[-8.9321235,4.9537389],[-8.9319384,4.9537389],[-8.9317426,4.9537255],[-8.9316246,4.9537042],[-8.9314207,4.9536373],[-8.9305249,4.9532659],[-8.9295512,4.9529478],[-8.9292428,4.9528491],[-8.9288539,4.9527288],[-8.9283764,4.9525658],[-8.927502,4.9522237],[-8.9266008,4.9518362],[-8.9255494,4.9514087],[-8.9250398,4.9511922],[-8.9239964,4.9508475],[-8.9229476,4.9505081],[-8.9222449,4.9502676],[-8.9213598,4.9500031],[-8.9204773,4.9497866],[-8.920185,4.9497305],[-8.9197987,4.9496904],[-8.9196016,4.9496851],[-8.9194517,4.9496653],[-8.9193184,4.9496369],[-8.9189618,4.9495035],[-8.9188359,4.9494206],[-8.9187473,4.9493351],[-8.918514,4.949124],[-8.9182377,4.9489557],[-8.9179883,4.9488114],[-8.9175671,4.9486083],[-8.9167786,4.9482663],[-8.9162261,4.9480097],[-8.9155098,4.9477265],[-8.9148903,4.9474966],[-8.9141956,4.9471814],[-8.91323,4.9468019],[-8.9119774,4.946254],[-8.9109931,4.9458479],[-8.9098021,4.9453215],[-8.9089036,4.9449179],[-8.9079541,4.9444984],[-8.9071012,4.9441002],[-8.9060444,4.9435658],[-8.9052209,4.9431944],[-8.9042312,4.9428363],[-8.902241,4.9421949],[-8.9008731,4.9416899],[-8.8997465,4.9412222],[-8.8987085,4.9407412],[-8.8978851,4.9403564],[-8.8968015,4.939806],[-8.8959003,4.9393784],[-8.8949857,4.9390523],[-8.8940281,4.9387518],[-8.8919534,4.93822],[-8.8908041,4.9379621],[-8.8899779,4.937743],[-8.8888112,4.9374143],[-8.8871643,4.9368264],[-8.8861129,4.9364683],[-8.8852304,4.9361503],[-8.8841146,4.9357121],[-8.8830391,4.9352685],[-8.8814217,4.9346405],[-8.8802952,4.9341728],[-8.879182,4.9337319],[-8.8775164,4.9328848],[-8.8750903,4.9315025],[-8.8736969,4.9306909],[-8.8729325,4.9303622],[-8.8723987,4.9300976],[-8.8711636,4.9293494],[-8.8702449,4.9287508],[-8.8696656,4.9283847],[-8.8691024,4.9279697],[-8.8684532,4.927587],[-8.8676379,4.9271553],[-8.8667741,4.9267252],[-8.8655027,4.9259475],[-8.864548,4.9253142],[-8.8635528,4.9247103],[-8.8627991,4.9242506],[-8.8624155,4.9239407],[-8.8621634,4.9235879],[-8.8619676,4.9231951],[-8.8618818,4.9228343],[-8.8618778,4.9225751],[-8.8618965,4.9223827],[-8.8619408,4.922217],[-8.8620052,4.9221041],[-8.8620575,4.9220513],[-8.8621272,4.9220366],[-8.862213,4.9220393],[-8.8623492,4.922068],[-8.8624115,4.9220714],[-8.8624712,4.9220532],[-8.8625047,4.9220152],[-8.8625403,4.9219083],[-8.862594,4.9218174],[-8.8626435,4.9217133],[-8.8626489,4.9216343],[-8.8626207,4.9215756],[-8.8625108,4.9214834],[-8.8623941,4.92142],[-8.8622278,4.9212884],[-8.8621943,4.9212415],[-8.8621788,4.9211981],[-8.8621742,4.9211146],[-8.8622057,4.9210394],[-8.8622084,4.9209913],[-8.8621902,4.9209653],[-8.8621537,4.9209619],[-8.8621225,4.9209796],[-8.8620823,4.921013],[-8.8620608,4.9210204],[-8.8620404,4.921023],[-8.8620186,4.921016],[-8.8619807,4.9209953],[-8.8619539,4.920993],[-8.8619277,4.9209987],[-8.8618979,4.9210121],[-8.8618577,4.9210214],[-8.8618127,4.9210164],[-8.8613963,4.9207766],[-8.8609377,4.9205174],[-8.8601733,4.9201139],[-8.8589931,4.9195393],[-8.8575098,4.9188312],[-8.8566327,4.9184009],[-8.8551763,4.9174496],[-8.8541356,4.9166719],[-8.8527382,4.9156938],[-8.8516036,4.9149082],[-8.8510887,4.9145608],[-8.8506514,4.9142],[-8.8498575,4.9136361],[-8.8495866,4.9133662],[-8.8493292,4.9131257],[-8.8491359,4.9128852],[-8.849018,4.9127088],[-8.8489294,4.9125351],[-8.8488893,4.9123534],[-8.8488878,4.9122224],[-8.8488758,4.9121756],[-8.8488342,4.9121435],[-8.8486586,4.9120715],[-8.8485552,4.9120139],[-8.8484715,4.9119318],[-8.8483099,4.9117468],[-8.8481542,4.9115223],[-8.8479559,4.9111508],[-8.8478002,4.9108034],[-8.8476205,4.9101861],[-8.8475509,4.909888],[-8.8474952,4.9096328],[-8.8475011,4.9095361],[-8.847514,4.9094358],[-8.8475167,4.909385],[-8.847516,4.9093509],[-8.8474964,4.9093216],[-8.8474302,4.9092874],[-8.8473618,4.9092393],[-8.8472679,4.9091538],[-8.847182,4.9090396],[-8.8470372,4.9088245],[-8.8467622,4.908425],[-8.8464135,4.9079039],[-8.8460514,4.9073908],[-8.8457403,4.9068483],[-8.8455015,4.9062845],[-8.84533,4.9058034],[-8.8452172,4.9053438],[-8.8451448,4.9048093],[-8.8451394,4.9041465],[-8.845185,4.9034036],[-8.8452427,4.902972],[-8.845287,4.9027302],[-8.8453689,4.902499],[-8.8454895,4.9023066],[-8.8457295,4.9019659],[-8.846103,4.9015403],[-8.8462257,4.9014534],[-8.8463847,4.9013873],[-8.8465798,4.9013566],[-8.8466865,4.9013506],[-8.8470157,4.9013806],[-8.8474146,4.9014314],[-8.8475569,4.9014701],[-8.8476064,4.9014761],[-8.8476694,4.9014687],[-8.8477654,4.901422],[-8.8478332,4.9013733],[-8.8479678,4.9013506],[-8.8480645,4.9013606],[-8.8481757,4.9013793],[-8.8482952,4.9013833],[-8.8483552,4.9013672],[-8.848397,4.9013379],[-8.8484533,4.901259],[-8.8484868,4.9011414],[-8.848495,4.9010372],[-8.8485029,4.9009443],[-8.8485291,4.9008582],[-8.8485841,4.9007446],[-8.8486411,4.9006931],[-8.8487852,4.9006297],[-8.848853,4.9005562],[-8.8488717,4.9004653],[-8.8488825,4.9003892],[-8.8488731,4.9003183],[-8.8488477,4.9002635],[-8.8488033,4.9002181],[-8.8486987,4.9001633],[-8.8486304,4.9001231],[-8.8484855,4.9000057],[-8.8483232,4.8997972],[-8.8481744,4.8995914],[-8.8480149,4.8993401],[-8.8479102,4.899073],[-8.8478458,4.8987536],[-8.8478377,4.898618],[-8.8478502,4.8985701],[-8.8478746,4.8985551],[-8.8479414,4.8985114],[-8.847994,4.898489],[-8.8480014,4.8984673],[-8.848001,4.8984475],[-8.8479809,4.8984288],[-8.8479531,4.8984215],[-8.8478793,4.8984285],[-8.8478431,4.8984141],[-8.8478251,4.8983787],[-8.8478278,4.8983046],[-8.8478392,4.8982424],[-8.8478465,4.8981811],[-8.8478298,4.8981015],[-8.8478137,4.8980373],[-8.8477797,4.8979603],[-8.8477554,4.8979478],[-8.8477232,4.8979441],[-8.84763,4.8979719],[-8.8475971,4.8979742],[-8.8475616,4.8979638],[-8.8475106,4.8979358],[-8.8474908,4.8979328],[-8.8474704,4.8979378],[-8.8474529,4.8979495],[-8.8474472,4.8979638],[-8.8474461,4.8979867],[-8.8474496,4.898054],[-8.8474421,4.8981109],[-8.8474348,4.8981329],[-8.847402,4.8981623],[-8.8473638,4.8981743],[-8.8472772,4.8981991],[-8.8471243,4.8982332],[-8.8470546,4.8982271],[-8.8470116,4.8981797],[-8.8469634,4.8980667],[-8.8469205,4.8980246],[-8.8468708,4.8979907],[-8.8467749,4.8979452],[-8.8467404,4.8979358],[-8.8467213,4.8979445],[-8.8467196,4.8979709],[-8.8467052,4.8979815],[-8.8466861,4.8979789],[-8.8466599,4.8979665],[-8.8465952,4.8979117],[-8.8463947,4.8978076],[-8.8462405,4.8977715],[-8.8461226,4.8977193],[-8.8459549,4.8976191],[-8.8457295,4.8974415],[-8.8453674,4.8971288],[-8.8450724,4.896891],[-8.8448645,4.8967587],[-8.8445602,4.8966036],[-8.8442303,4.8964098],[-8.8440908,4.8963377],[-8.8439499,4.8962776],[-8.8437528,4.8962094],[-8.8433906,4.8960786],[-8.8428676,4.8958554],[-8.8423231,4.8955895],[-8.8419369,4.8953797],[-8.8411738,4.8949775],[-8.8407072,4.8947609],[-8.8402189,4.8945526],[-8.839893,4.8944163],[-8.8397161,4.8943427],[-8.8396181,4.8942894],[-8.8395014,4.8941945],[-8.8394062,4.8940502],[-8.8393781,4.893946],[-8.8393794,4.8938751],[-8.8394129,4.8937856],[-8.8394565,4.8937482],[-8.8395363,4.8937181],[-8.839602,4.8937114],[-8.8396543,4.8936934],[-8.8396718,4.8936627],[-8.8396731,4.8936199],[-8.8396382,4.8935451],[-8.8395859,4.8934916],[-8.8394143,4.89337],[-8.839303,4.8933406],[-8.8391756,4.89333],[-8.839024,4.8933393],[-8.8388738,4.8933714],[-8.8387035,4.8934128],[-8.8385023,4.8934382],[-8.8383494,4.8934275],[-8.8382019,4.8933941],[-8.8372162,4.8929411],[-8.8367388,4.8927086],[-8.8360575,4.892249],[-8.8352744,4.8916636],[-8.8348694,4.8914097],[-8.8344924,4.8912227],[-8.8341115,4.8910036],[-8.8336328,4.8907444],[-8.8332493,4.8905866],[-8.8329045,4.8904785],[-8.8321724,4.8901216],[-8.8317123,4.8898357],[-8.8312617,4.8895204],[-8.830889,4.8892958],[-8.8306181,4.8891782],[-8.8303685,4.8890955],[-8.8298696,4.8889672],[-8.8295317,4.888891],[-8.8287754,4.8886437],[-8.8282281,4.88843],[-8.8275763,4.8881067],[-8.8271151,4.8878019],[-8.8266483,4.8874813],[-8.8258008,4.8869815],[-8.8250577,4.88657],[-8.8240412,4.8860409],[-8.8228422,4.8854396],[-8.8219035,4.8849986],[-8.8208521,4.8845442],[-8.8197899,4.8840659],[-8.8188538,4.8836356],[-8.8171774,4.8828392],[-8.8168985,4.882711],[-8.8164452,4.8824491],[-8.8160267,4.8821578],[-8.8159195,4.882115],[-8.8158095,4.8820883],[-8.8154367,4.8820268],[-8.8150075,4.8819172],[-8.81475,4.881805],[-8.8144791,4.8816527],[-8.8137844,4.8812946],[-8.8134331,4.8810647],[-8.813087,4.8808429],[-8.8123937,4.8804287],[-8.8116413,4.8800759],[-8.8110808,4.8798274],[-8.8103566,4.8794292],[-8.8100964,4.8792661],[-8.8099262,4.8790963],[-8.8098202,4.8789534],[-8.8097222,4.8787811],[-8.809662,4.8786006],[-8.8096512,4.8785278],[-8.8096526,4.8784603],[-8.8096659,4.8783976],[-8.8096968,4.8783253],[-8.8097418,4.8782759],[-8.8098182,4.8782358],[-8.8098973,4.8781843],[-8.8099356,4.8781362],[-8.8099483,4.8781035],[-8.809947,4.8780701],[-8.8099342,4.878048],[-8.8098945,4.8780334],[-8.8097813,4.8780427],[-8.8096673,4.878038],[-8.809438,4.8780113],[-8.8092709,4.8779633],[-8.8091832,4.8779178],[-8.8091376,4.8778944],[-8.8090732,4.8778777],[-8.809031,4.8778783],[-8.8089981,4.8778864],[-8.808921,4.8779271],[-8.8088412,4.8779746],[-8.8087923,4.8779913],[-8.8087487,4.8779826],[-8.8086815,4.8779513],[-8.8085998,4.8779111],[-8.8084254,4.8778163],[-8.8081357,4.8776199],[-8.8078702,4.877366],[-8.8074759,4.876917],[-8.8066846,4.8759603],[-8.8064098,4.8756207],[-8.806183,4.8752761],[-8.8059953,4.874934],[-8.805778,4.8744049],[-8.80566,4.8740735],[-8.8055769,4.8737501],[-8.8055461,4.8735161],[-8.8055219,4.8732904],[-8.8055219,4.8731007],[-8.8055434,4.8730151],[-8.8056023,4.8729136],[-8.8056439,4.8728754],[-8.8057056,4.8728527],[-8.8057817,4.8728378],[-8.8058166,4.872817],[-8.8058404,4.8727832],[-8.8058424,4.8727485],[-8.8058217,4.872701],[-8.8057982,4.8726462],[-8.8057547,4.8725587],[-8.8057103,4.8724513],[-8.805662,4.8723283],[-8.805369,4.8716722],[-8.8052121,4.8712486],[-8.8051036,4.8708917],[-8.804948,4.8703292],[-8.8049158,4.8701194],[-8.8049184,4.8699792],[-8.8049426,4.8698174],[-8.8049881,4.8696785],[-8.8050673,4.8695501],[-8.8051276,4.8694701],[-8.8051953,4.8694219],[-8.8052514,4.8694108],[-8.8053114,4.8693965],[-8.8053647,4.8693757],[-8.8054003,4.8693487],[-8.8054123,4.8693186],[-8.8054097,4.8692952],[-8.8053973,4.8692729],[-8.8053473,4.8692461],[-8.8053329,4.8692227],[-8.8053222,4.869172],[-8.8052925,4.8691367],[-8.8052477,4.8691226],[-8.805176,4.8691105],[-8.8050868,4.8690898],[-8.8050479,4.8690751],[-8.8050291,4.869051],[-8.8050217,4.8690256],[-8.8050243,4.8690059],[-8.8050288,4.8689988],[-8.805035,4.8689926],[-8.8050499,4.8689891],[-8.8050881,4.8689882],[-8.8051123,4.8689782],[-8.8051304,4.8689501],[-8.8051364,4.8689114],[-8.8051176,4.8688219],[-8.8051025,4.8687804],[-8.8050653,4.868749],[-8.8049983,4.868744],[-8.8049549,4.8687495],[-8.804842,4.8687758],[-8.8047508,4.8688072],[-8.8045549,4.8688714],[-8.8044893,4.8688847],[-8.8044129,4.8688793],[-8.8040909,4.8687658],[-8.803812,4.8686483],[-8.8035412,4.8685454],[-8.8033386,4.8684064],[-8.8031375,4.8682287],[-8.8030852,4.8682006],[-8.8030289,4.8681925],[-8.8028036,4.86821],[-8.8027218,4.8681966],[-8.8026815,4.8681846],[-8.8025353,4.8681325],[-8.8023797,4.8680643],[-8.8022214,4.8679788],[-8.8018003,4.867785],[-8.8011218,4.8674296],[-8.8007838,4.8672318],[-8.8004003,4.8670127],[-8.7998718,4.8666278],[-8.7995768,4.8663338],[-8.7992496,4.8659356],[-8.7989143,4.8655267],[-8.7984611,4.8650296],[-8.7982143,4.8647624],[-8.7978575,4.8643775],[-8.7977074,4.8642065],[-8.797596,4.8640288],[-8.7975478,4.8638831],[-8.7975196,4.8638243],[-8.7974807,4.8637869],[-8.7974311,4.8637709],[-8.7973091,4.8637522],[-8.7971816,4.863692],[-8.7970033,4.8635704],[-8.7967847,4.8634315],[-8.7962643,4.8631001],[-8.7957224,4.8626697],[-8.7949231,4.8618653],[-8.7944109,4.8613522],[-8.7939119,4.8608123],[-8.7935753,4.8603754],[-8.7932132,4.8599705],[-8.7930336,4.8596965],[-8.7928459,4.8593999],[-8.7926862,4.8590698],[-8.7922329,4.8579487],[-8.7921646,4.8576908],[-8.7920773,4.857183],[-8.7919995,4.8564106],[-8.7919968,4.8560258],[-8.7920251,4.8556877],[-8.7920653,4.8555233],[-8.7921095,4.855387],[-8.7921686,4.8552895],[-8.7922892,4.8550877],[-8.7924743,4.8546748],[-8.792583,4.854481],[-8.7926889,4.8543594],[-8.7927908,4.8542472],[-8.7929249,4.8541336],[-8.7930752,4.8539906],[-8.793236,4.8538503],[-8.7933863,4.8537314],[-8.7935042,4.8536311],[-8.7935506,4.853579],[-8.7935761,4.8535322],[-8.7935929,4.8534694],[-8.7935741,4.8534173],[-8.7935331,4.8533993],[-8.7934553,4.8534066],[-8.7933379,4.8534173],[-8.793228,4.8534387],[-8.7928821,4.8534815],[-8.7925574,4.8535135],[-8.7923938,4.8535242],[-8.7922142,4.8535216],[-8.792021,4.8534708],[-8.7918414,4.8533505],[-8.7913343,4.8530378],[-8.7904707,4.8526129],[-8.7897197,4.852252],[-8.7890276,4.8519634],[-8.7885396,4.8517495],[-8.7878528,4.8514102],[-8.7871797,4.851044],[-8.7867343,4.8508009],[-8.7855716,4.8501033],[-8.7848461,4.8495955],[-8.7845458,4.8493896],[-8.7843633,4.8492908],[-8.7839046,4.8491011],[-8.7833574,4.8488819],[-8.7826279,4.8486574],[-8.7823838,4.8485639],[-8.7821558,4.8484623],[-8.7816314,4.8481563],[-8.7814611,4.8480427],[-8.7813243,4.8479091],[-8.7811828,4.8477467],[-8.7811419,4.8477026],[-8.7811078,4.8476779],[-8.7810474,4.8476659],[-8.7809528,4.8476779],[-8.7808509,4.847698],[-8.7805103,4.8477046],[-8.7801415,4.8476819],[-8.7797928,4.8476098],[-8.7792456,4.8474106],[-8.7781835,4.8469095],[-8.7774004,4.8465219],[-8.776373,4.8460436],[-8.7756488,4.8456801],[-8.7746939,4.8452552],[-8.7741333,4.84502],[-8.7736827,4.8447982],[-8.7732161,4.8444854],[-8.7727828,4.8442276],[-8.7724423,4.8440658],[-8.7720922,4.8439015],[-8.7708879,4.8434565],[-8.7701368,4.8431866],[-8.7692572,4.8428016],[-8.7687099,4.8425852],[-8.7681533,4.8424088],[-8.767232,4.8420534],[-8.7667949,4.8418984],[-8.7662088,4.8417474],[-8.7654698,4.8416044],[-8.7648342,4.8414306],[-8.7642682,4.8412409],[-8.7634125,4.8409255],[-8.761484,4.8403295],[-8.7607196,4.8401157],[-8.7595206,4.8398217],[-8.7589709,4.839688],[-8.7582413,4.8394743],[-8.7576377,4.8392551],[-8.7569512,4.8389825],[-8.7561787,4.8387927],[-8.755484,4.8386431],[-8.7550548,4.8385549],[-8.7546578,4.8384947],[-8.7533408,4.8382448],[-8.7527668,4.8381192],[-8.7526235,4.8380337],[-8.7523591,4.8379175],[-8.7519408,4.837777],[-8.7515625,4.8376756],[-8.7507874,4.8375366],[-8.7496931,4.8373121],[-8.7487838,4.8370902],[-8.7480341,4.8368564],[-8.74722,4.8366305],[-8.7463081,4.8363927],[-8.7455409,4.8362163],[-8.7442455,4.8359277],[-8.7432423,4.8356658],[-8.742097,4.8354332],[-8.7414721,4.8352942],[-8.7404877,4.8349762],[-8.740021,4.8348238],[-8.7369633,4.8338644],[-8.7361988,4.8336853],[-8.7350455,4.8333218],[-8.7345037,4.8331107],[-8.7333021,4.8326563],[-8.7327281,4.832504],[-8.7321863,4.8323276],[-8.7301016,4.8315694],[-8.7291983,4.8312612],[-8.7284553,4.8309324],[-8.7278947,4.8306518],[-8.7274629,4.830422],[-8.7269506,4.8300798],[-8.7262237,4.8295132],[-8.7257195,4.8291177],[-8.7251508,4.82865],[-8.7247512,4.8281956],[-8.7243488,4.8275836],[-8.7240484,4.8270731],[-8.7237158,4.8263808],[-8.7236542,4.826175],[-8.7235817,4.8257447],[-8.7235656,4.8254935],[-8.7235093,4.825122],[-8.7234503,4.8248922],[-8.7234101,4.8247452],[-8.7232786,4.8245661],[-8.7231016,4.8244244],[-8.7228334,4.8243068],[-8.7226108,4.8241839],[-8.7224445,4.8240502],[-8.7222782,4.8238872],[-8.7221038,4.8236574],[-8.7217766,4.823219],[-8.7213555,4.8227112],[-8.7209719,4.822166],[-8.7206447,4.8216368],[-8.7204945,4.8213268],[-8.7203228,4.8208831],[-8.7202236,4.8204982],[-8.7200171,4.819798],[-8.7198749,4.8192607],[-8.7197837,4.8187396],[-8.7197542,4.8182986],[-8.7197757,4.8178789],[-8.7198186,4.8175903],[-8.7200063,4.8169488],[-8.7201674,4.8165665],[-8.720461,4.8159638],[-8.7205161,4.8158836],[-8.7206259,4.8157554],[-8.7207238,4.8156873],[-8.7209223,4.8156111],[-8.7215406,4.8153666],[-8.7216559,4.8152971],[-8.7218196,4.815182],[-8.7219711,4.815114],[-8.7220609,4.8150913],[-8.7222138,4.8150806],[-8.7223788,4.8151086],[-8.7224512,4.81513],[-8.7225491,4.8152089],[-8.722588,4.8152957],[-8.7225974,4.8153786],[-8.722584,4.8154815],[-8.7225947,4.8155121],[-8.7226148,4.815539],[-8.7226886,4.8155523],[-8.722761,4.8155269],[-8.7228508,4.8154387],[-8.722993,4.8153318],[-8.7232518,4.8152169],[-8.7236112,4.8151019],[-8.7239197,4.8150325],[-8.7242349,4.8149429],[-8.7245406,4.8148093],[-8.7247264,4.814717],[-8.7247894,4.8146836],[-8.7248357,4.8146368],[-8.7248685,4.8145927],[-8.7248749,4.81457],[-8.7248719,4.8145489],[-8.7248534,4.8145292],[-8.7248216,4.8145309],[-8.7246895,4.8145526],[-8.7245574,4.8145567],[-8.7243374,4.8145875],[-8.7242759,4.8146094],[-8.7242376,4.8146094],[-8.7242068,4.814588],[-8.7242021,4.8145613],[-8.7242087,4.8145366],[-8.7242376,4.8144637],[-8.7242496,4.8144016],[-8.7242375,4.8143682],[-8.7241981,4.8143375],[-8.7241584,4.8143402],[-8.7241082,4.8143635],[-8.7240541,4.8143949],[-8.7240348,4.8144083],[-8.7240127,4.814414],[-8.7239949,4.814413],[-8.7239768,4.8143989],[-8.7239661,4.8143608],[-8.7239452,4.8143441],[-8.7239158,4.8143375],[-8.7238849,4.8143415],[-8.7238352,4.8143588],[-8.7237742,4.8143842],[-8.7237414,4.8143916],[-8.7236864,4.8143849],[-8.7235911,4.8143522],[-8.7235067,4.8143094],[-8.7234209,4.8142666],[-8.7232372,4.8142212],[-8.722942,4.814157],[-8.7226711,4.8140902],[-8.7221803,4.8139821],[-8.7219886,4.8139259],[-8.7214306,4.8137134],[-8.7211436,4.8135757],[-8.7205347,4.8133059],[-8.7196255,4.8129503],[-8.7187028,4.8125521],[-8.718566,4.8124839],[-8.7185071,4.8124305],[-8.7184225,4.8123009],[-8.7183152,4.8120964],[-8.7181945,4.8119066],[-8.7180431,4.8116981],[-8.7178996,4.8115511],[-8.7176956,4.8113922],[-8.7174287,4.8112505],[-8.7172718,4.8111368],[-8.7171806,4.8110568],[-8.7170037,4.8108535],[-8.716883,4.8106905],[-8.7167864,4.8105274],[-8.7167194,4.8103457],[-8.7166871,4.8102067],[-8.7166764,4.8100044],[-8.7166885,4.8098846],[-8.7167052,4.8097443],[-8.7167019,4.8096896],[-8.7166851,4.8096441],[-8.7166624,4.8096281],[-8.7166261,4.8096154],[-8.7164819,4.8095846],[-8.7163579,4.8095325],[-8.7162378,4.8094705],[-8.7160675,4.8093073],[-8.7159441,4.8091483],[-8.7158584,4.8089879],[-8.7158315,4.8087942],[-8.7158315,4.8086485],[-8.7158516,4.808551],[-8.7158812,4.808452],[-8.7159818,4.8083291],[-8.7160462,4.8082436],[-8.7161119,4.8081246],[-8.7161333,4.8080471],[-8.7161307,4.8079175],[-8.7160649,4.8078373],[-8.7159087,4.807707],[-8.7158469,4.807675],[-8.7158088,4.8076676],[-8.7157444,4.807681],[-8.7156519,4.8077271],[-8.7155533,4.8077571],[-8.7154816,4.8077732],[-8.7151972,4.8078119],[-8.714992,4.8078093],[-8.7146392,4.807796],[-8.7145066,4.8077892],[-8.7142772,4.8078039],[-8.7141123,4.8078266],[-8.7139245,4.807868],[-8.7137046,4.8078961],[-8.7135342,4.8079042],[-8.7131078,4.8078908],[-8.7127323,4.8078721],[-8.7122468,4.8078306],[-8.7116338,4.8077773],[-8.7113174,4.8077264],[-8.7109512,4.8076664],[-8.7098355,4.8074671],[-8.7094533,4.8073682],[-8.7090267,4.8072227],[-8.7059911,4.8104708],[-8.7050585,4.8112868],[-8.7014222,4.8144685],[-8.6967398,4.8188088],[-8.6939986,4.8218924],[-8.6938842,4.825433],[-8.6939984,4.8297731],[-8.6820631,4.8381108],[-8.6811333,4.8389918],[-8.6777227,4.8422226],[-8.6691566,4.8494178],[-8.6610477,4.856271],[-8.6490551,4.8658649],[-8.6385476,4.8753446],[-8.6288393,4.8844819],[-8.6271549,4.8856683],[-8.6166756,4.8930477],[-8.6125637,4.8984161],[-8.6049114,4.9051546],[-8.6030119,4.907596],[-8.6017133,4.909266],[-8.598173,4.9142915],[-8.5952269,4.9199872],[-8.5947466,4.9209159],[-8.5916625,4.9265126],[-8.5883505,4.9331371],[-8.5829821,4.9429592],[-8.576301,4.9548374],[-8.5750447,4.9588351],[-8.5724174,4.9643172],[-8.5721871,4.9647858],[-8.5628235,4.9838483],[-8.5600825,4.9871603],[-8.5583456,4.9878426],[-8.5568845,4.9884167],[-8.5525445,4.9893302],[-8.5462627,4.9895589],[-8.5410087,4.9891018],[-8.5321,4.988188],[-8.52479,4.9883027],[-8.5167951,4.9883025],[-8.5065158,4.9884164],[-8.5008054,4.9883024],[-8.4888698,4.989787],[-8.4815605,4.9891017],[-8.4754462,4.9893167],[-8.4750499,4.9893306],[-8.4662557,4.9899013],[-8.4608877,4.9910435],[-8.4601559,4.9910604],[-8.455976,4.9911576],[-8.4460398,4.9909294],[-8.4372452,4.9913861],[-8.4326315,4.9917672],[-8.4247957,4.9924139],[-8.414859,4.9940131],[-8.4080063,4.9941274],[-8.4014963,4.9943555],[-8.399212,4.9948126],[-8.3970418,4.9957265],[-8.393844,4.9965258],[-8.3913879,4.9998378],[-8.3880759,5.0039496],[-8.3856777,5.0087469],[-8.3823654,5.0142291],[-8.3801953,5.0197112],[-8.3788245,5.0247367],[-8.3767688,5.0278206],[-8.3756262,5.0281722],[-8.373799,5.0287342],[-8.370944,5.0291911],[-8.3676313,5.0307902],[-8.3638627,5.033303],[-8.3598651,5.0365009],[-8.3548967,5.0407267],[-8.3520414,5.0432392],[-8.3496426,5.0447243],[-8.3482721,5.045208],[-8.3438181,5.0467798],[-8.3429367,5.0469173],[-8.3401629,5.0473511],[-8.3346809,5.0458665],[-8.3288561,5.0459804],[-8.3233739,5.0463229],[-8.3193763,5.0475795],[-8.3151503,5.050549],[-8.3129119,5.0522275],[-8.3114951,5.0532905],[-8.3069267,5.0568311],[-8.3044141,5.0608284],[-8.3030435,5.0660821],[-8.3014443,5.0720213],[-8.3008468,5.0739553],[-8.299503,5.0783033],[-8.2989262,5.0793926],[-8.2964193,5.0841283],[-8.2934497,5.0882398],[-8.2901372,5.0901816],[-8.2853404,5.0924655],[-8.2810004,5.0946357],[-8.2795155,5.096463],[-8.2771414,5.0987421],[-8.2766599,5.0992046],[-8.2737479,5.1035445],[-8.2718057,5.1067423],[-8.2705496,5.1121107],[-8.26758,5.1188493],[-8.2646102,5.1242174],[-8.2620979,5.1318696],[-8.2599279,5.1383795],[-8.2571868,5.1453467],[-8.2555876,5.1496868],[-8.2549,5.1533134],[-8.254788,5.1579102],[-8.2512473,5.1656769],[-8.2527332,5.2060227],[-8.2519803,5.2132347],[-8.2494367,5.2322671],[-8.2479909,5.251408],[-8.2478895,5.2524236],[-8.2449065,5.2595017],[-8.2350822,5.2828113],[-8.236084,5.2841061],[-8.2367851,5.2850121],[-8.2441687,5.294552],[-8.2433138,5.3013737],[-8.2430296,5.3036416],[-8.2417077,5.306283],[-8.2350369,5.3196161],[-8.2234656,5.3381211],[-8.2229695,5.3379214],[-8.2165282,5.3333661],[-8.206519,5.3331277],[-8.2059031,5.3331127],[-8.2026788,5.3337073],[-8.197428,5.3320247],[-8.1958392,5.3323766],[-8.1931288,5.3329768],[-8.1887089,5.334766],[-8.1824991,5.3358348],[-8.1801997,5.3347937],[-8.1800489,5.3344916],[-8.1782077,5.3308031],[-8.1754652,5.3284057],[-8.17242,5.3283655],[-8.1693444,5.3287836],[-8.1623231,5.3355685],[-8.1570668,5.3375954],[-8.1550376,5.3374728],[-8.1518781,5.3360375],[-8.1513387,5.3357925],[-8.1504672,5.3366637],[-8.1496934,5.3374371],[-8.1451217,5.3420067],[-8.1375923,5.3476202],[-8.1298333,5.3512093],[-8.1281834,5.3512772],[-8.1272762,5.3513145],[-8.1244542,5.3514307],[-8.1218678,5.3492402],[-8.117414,5.3489076],[-8.1144207,5.3468794],[-8.1019527,5.3386525],[-8.097071,5.3351668],[-8.0958258,5.3342774],[-8.0949508,5.334777],[-8.0933166,5.3357097],[-8.0929553,5.3378631],[-8.0904462,5.3391755],[-8.0884135,5.3414463],[-8.0887638,5.3467118],[-8.0875689,5.3473087],[-8.0854203,5.3470658],[-8.0829136,5.3481625],[-8.0836239,5.3507728],[-8.08135,5.3543593],[-8.0828931,5.3604644],[-8.0845607,5.3629798],[-8.0834842,5.3642943],[-8.0801423,5.363811],[-8.0742864,5.3675114],[-8.0724218,5.3707649],[-8.0713983,5.3824652],[-8.0726886,5.3975446],[-8.0746948,5.4133431],[-8.0765955,5.4194487],[-8.0776779,5.4210203],[-8.0778845,5.4213203],[-8.0787401,5.422563],[-8.0818431,5.4237646],[-8.089687,5.4245441],[-8.0998621,5.4308516],[-8.1057713,5.4338583],[-8.1120346,5.4355365],[-8.1140397,5.4369358],[-8.1163441,5.4384984],[-8.120504,5.4416517],[-8.1314445,5.4426128],[-8.1343534,5.4428686],[-8.1392767,5.4439922],[-8.1443805,5.4451567],[-8.1575359,5.4429783],[-8.1589265,5.4429803],[-8.1615794,5.442309],[-8.1644103,5.4430597],[-8.1706514,5.4447146],[-8.1724865,5.4443485],[-8.1761234,5.4436225],[-8.1951147,5.4567146],[-8.2142058,5.4679881],[-8.2284052,5.4769815],[-8.2355627,5.4829744],[-8.2450374,5.4937946],[-8.250031,5.4952308],[-8.2596044,5.5006691],[-8.2716841,5.5006839],[-8.2779251,5.5065351],[-8.2821697,5.5112095],[-8.2875526,5.517137],[-8.2884564,5.5181326],[-8.2896741,5.5171526],[-8.2908932,5.5158961],[-8.293411,5.5133007],[-8.2943473,5.5106525],[-8.2943084,5.5092153],[-8.3080883,5.5112046],[-8.3114499,5.5116896],[-8.3252925,5.5112583],[-8.3319607,5.5110504],[-8.3447629,5.5106508],[-8.3609584,5.5101448],[-8.3657172,5.5170271],[-8.3933398,5.5569712],[-8.4008252,5.567795],[-8.4118568,5.5906952],[-8.4247342,5.6174697],[-8.413529,5.6414621],[-8.4098872,5.6453306],[-8.409127,5.6448431],[-8.4087219,5.6447036],[-8.4076624,5.6443384],[-8.404632,5.6457516],[-8.4033746,5.6463377],[-8.4006442,5.6464129],[-8.3887911,5.6467398],[-8.381706,5.6484024],[-8.3807424,5.6554866],[-8.3796793,5.6633062],[-8.3796064,5.6638438],[-8.3791949,5.6660986],[-8.3787992,5.6682647],[-8.37793,5.6730247],[-8.3737551,5.6805334],[-8.3702087,5.6849123],[-8.3677141,5.6864988],[-8.3610354,5.6907458],[-8.3568357,5.6969014],[-8.3547751,5.6999215],[-8.3555006,5.7022561],[-8.3535103,5.712816],[-8.3526598,5.7278413],[-8.3509841,5.7357698],[-8.3506944,5.7408939],[-8.350559,5.7432824],[-8.350969,5.7491265],[-8.354101,5.7517839],[-8.3537635,5.7567017],[-8.3584452,5.7713002],[-8.360307,5.7831981],[-8.360712,5.7940508],[-8.3627289,5.8011523],[-8.3632024,5.802819],[-8.36369,5.8033832],[-8.3654992,5.8054782],[-8.3678672,5.8082212],[-8.3686137,5.8090859],[-8.3722335,5.8109901],[-8.3773609,5.8136869],[-8.3898577,5.8195442],[-8.4011266,5.8286921],[-8.4123963,5.834923],[-8.4134001,5.8354781],[-8.426512,5.8412872],[-8.4360717,5.8480124],[-8.4444774,5.8520869],[-8.4540057,5.8567583],[-8.4659975,5.8591694],[-8.4731749,5.8613681],[-8.4775556,5.85699],[-8.4799271,5.8548347],[-8.4821443,5.85282],[-8.4838433,5.8525598],[-8.4875638,5.85199],[-8.4871512,5.8469809],[-8.4862819,5.8443607],[-8.4859046,5.8432229],[-8.487144,5.8399222],[-8.4884112,5.8365469],[-8.4883686,5.8336165],[-8.4875839,5.829868],[-8.488839,5.8248599],[-8.4917808,5.8230629],[-8.49619,5.82037],[-8.5013488,5.8177756],[-8.5017639,5.8177759],[-8.5067667,5.8177803],[-8.5094977,5.8180863],[-8.5105027,5.8180069],[-8.5130215,5.8148639],[-8.5201047,5.8169568],[-8.5237098,5.8169598],[-8.5246893,5.8169606],[-8.5267792,5.8102841],[-8.5290769,5.8068384],[-8.5309516,5.804026],[-8.5367934,5.795683],[-8.5422147,5.7919304],[-8.5476336,5.7911003],[-8.5526984,5.7846284],[-8.5546756,5.7821021],[-8.555143,5.781506],[-8.5561183,5.7801753],[-8.5597322,5.775248],[-8.5735405,5.770615],[-8.5983417,5.7675709],[-8.6039662,5.7668806],[-8.6281396,5.7643922],[-8.6498172,5.7646971],[-8.6524629,5.7648248],[-8.6703671,5.7648355],[-8.6715023,5.7649113],[-8.6756497,5.7648385],[-8.6956561,5.7606753],[-8.7005522,5.7600987],[-8.7223299,5.7577675],[-8.7369178,5.7536001],[-8.7395302,5.7526401],[-8.7414311,5.7519416],[-8.755366,5.7468213],[-8.7533095,5.7447596],[-8.7518167,5.741392],[-8.7501383,5.7367149],[-8.7535019,5.7318522],[-8.7568653,5.7271773],[-8.7574274,5.7232492],[-8.7538813,5.7183841],[-8.7517349,5.7152967],[-8.7510231,5.7143792],[-8.7507057,5.71397],[-8.7491218,5.7119281],[-8.7466938,5.7126756],[-8.7438916,5.7143575],[-8.7364219,5.7137933],[-8.7366113,5.7081813],[-8.7399759,5.7008875],[-8.736615,5.7001374],[-8.733629,5.6954596],[-8.7340042,5.6920923],[-8.7369943,5.686295],[-8.742039,5.6803108],[-8.7423505,5.6795612],[-8.7776112,5.682664],[-8.7892861,5.6819375],[-8.8067967,5.6855982],[-8.8264957,5.6929137],[-8.8589125,5.6990114],[-8.8615187,5.6995015],[-8.8892449,5.7097405],[-8.9162435,5.7119378],[-8.9486409,5.7286068],[-8.9865866,5.7332868],[-9.0041002,5.7397191],[-9.0122735,5.7560918],[-9.0198637,5.7736338],[-9.0266422,5.7816747],[-9.0362118,5.7894209],[-9.0659899,5.8063757],[-9.0864263,5.815144],[-9.0898133,5.8220642],[-9.0936115,5.8289076],[-9.0919554,5.8207761],[-9.0919445,5.8193206],[-9.092499,5.8187564],[-9.0936742,5.8185553],[-9.0955817,5.8189849],[-9.0975536,5.8195001],[-9.0982923,5.8202742],[-9.0990025,5.8212939],[-9.1005657,5.8222724],[-9.102898,5.8229236],[-9.1052873,5.8225713],[-9.107786,5.8205767],[-9.1089953,5.8199379],[-9.1098915,5.8198115],[-9.1116683,5.8204422],[-9.114239,5.8210303],[-9.1155447,5.8204361],[-9.1162085,5.8197369],[-9.1181974,5.8178222],[-9.1189549,5.8166059],[-9.1191544,5.8150483],[-9.1199485,5.8107689],[-9.1194853,5.8085963],[-9.1194191,5.8066211],[-9.1200809,5.805041],[-9.1219339,5.8026708],[-9.1243824,5.7996422],[-9.1259045,5.798523],[-9.1283531,5.7981938],[-9.1298752,5.7976671],[-9.1306693,5.7967453],[-9.1306693,5.793585],[-9.1301399,5.7923341],[-9.129081,5.7916757],[-9.1282207,5.7903589],[-9.1281546,5.7887787],[-9.128684,5.786606],[-9.1294119,5.7855525],[-9.1306693,5.7852892],[-9.1325223,5.7859476],[-9.133912,5.7861451],[-9.1356988,5.7852892],[-9.1394709,5.7825238],[-9.1401989,5.7812729],[-9.1405298,5.7785075],[-9.1414563,5.7773224],[-9.1478093,5.7725159],[-9.1491329,5.7717258],[-9.1515815,5.7710016],[-9.1552212,5.7699481],[-9.1569419,5.7689605],[-9.1578683,5.7677094],[-9.1582654,5.7658],[-9.1578683,5.7641539],[-9.1567433,5.7623762],[-9.1316058,5.7537749],[-9.1168132,5.73008],[-9.1162361,5.7291557],[-9.1021114,5.7181557],[-9.0920354,5.6999097],[-9.0917694,5.6935382],[-9.0915895,5.689231],[-9.0957819,5.6778517],[-9.0958572,5.677647],[-9.1101727,5.6599655],[-9.1131023,5.6563464],[-9.1160125,5.6513883],[-9.1164026,5.6504559],[-9.1163983,5.6502422],[-9.1160595,5.6461798],[-9.1149008,5.6433954],[-9.1126276,5.6398547],[-9.1109023,5.6371671],[-9.106053,5.6330044],[-9.1025346,5.6296483],[-9.0998541,5.6263768],[-9.0984299,5.6229371],[-9.0982278,5.6227008],[-9.0969083,5.6189258],[-9.0966746,5.6185414],[-9.0937984,5.6138094],[-9.0923795,5.609935],[-9.0920639,5.6090728],[-9.0922724,5.6067043],[-9.0951191,5.6040193],[-9.095428,5.6018492],[-9.0955737,5.600827],[-9.0957045,5.5999082],[-9.0961908,5.5990594],[-9.0973774,5.5992905],[-9.101622,5.6001164],[-9.1086627,5.6014868],[-9.1114222,5.601947],[-9.125574,5.604307],[-9.129504,5.6063902],[-9.1324195,5.6079359],[-9.133768,5.6077462],[-9.1479812,5.6042317],[-9.1531158,5.604552],[-9.1537674,5.6051286],[-9.1590393,5.6052199],[-9.1755012,5.6055047],[-9.1899913,5.5909779],[-9.1914542,5.5897827],[-9.1944771,5.5873137],[-9.2027384,5.581515],[-9.204316,5.5810237],[-9.2063798,5.5803813],[-9.2125337,5.5784652],[-9.2159232,5.5781728],[-9.2266249,5.57725],[-9.2362251,5.5772462],[-9.2370604,5.5766986],[-9.2381072,5.5760123],[-9.2399047,5.5748339],[-9.2470029,5.5572549],[-9.2536138,5.552889],[-9.2572121,5.5510176],[-9.261523,5.5470031],[-9.2671354,5.5445112],[-9.2774946,5.5414685],[-9.2793503,5.5409232],[-9.2841733,5.5405341],[-9.2919791,5.5327052],[-9.2941127,5.5212719],[-9.2947138,5.5129857],[-9.2934205,5.4997713],[-9.2939425,5.4952721],[-9.2960259,5.4934234],[-9.3038805,5.4864543],[-9.3078967,5.4683002],[-9.3004883,5.4519894],[-9.2956157,5.4481787],[-9.2942448,5.4471063],[-9.2939732,5.444397],[-9.2933907,5.4385884],[-9.29339,5.4372467],[-9.2948474,5.4328585],[-9.296678,5.4295286],[-9.299371,5.4281567],[-9.3014255,5.4288127],[-9.3099972,5.4275204],[-9.3185086,5.4252781],[-9.32189,5.4241919],[-9.3224076,5.4219967],[-9.3224059,5.4187909],[-9.3238687,5.4127794],[-9.3249592,5.4117198],[-9.3243466,5.4102897],[-9.3199515,5.4032229],[-9.3198987,5.4031471],[-9.318139,5.3964424],[-9.3184807,5.386887],[-9.3189729,5.385899],[-9.3248965,5.3740095],[-9.3251177,5.3735655],[-9.3259515,5.3718921],[-9.3298038,5.3691518],[-9.3405229,5.3615272],[-9.3448205,5.358734],[-9.3468054,5.3574437],[-9.3472909,5.3565773],[-9.3481819,5.3570042],[-9.3521351,5.3549694],[-9.3583345,5.3566003],[-9.3608854,5.3523832],[-9.3639258,5.3512297],[-9.3650371,5.3512279],[-9.3667021,5.3493182],[-9.3717008,5.3488379],[-9.3754958,5.3488356],[-9.3750968,5.3434821],[-9.3750294,5.3425781],[-9.3749902,5.3420518],[-9.3823064,5.3278089],[-9.3825292,5.3277415],[-9.3885454,5.3259137],[-9.3918488,5.3249103],[-9.3976467,5.3209426],[-9.3977172,5.3209562],[-9.3982835,5.3205069],[-9.4013755,5.3183903],[-9.4016106,5.3182296],[-9.4048309,5.3164838],[-9.4101073,5.3136234],[-9.4127044,5.3122155],[-9.4136252,5.3121018],[-9.4140032,5.3118935],[-9.4228013,5.3108291],[-9.4254219,5.3102947],[-9.427124,5.3013043],[-9.4266404,5.2929479],[-9.4265032,5.2927168],[-9.4262845,5.2923683],[-9.4227382,5.2903153],[-9.4221555,5.2899995],[-9.422093,5.2898196],[-9.4219986,5.2895481],[-9.4225587,5.2891341],[-9.4226358,5.2888641],[-9.4225156,5.2886125],[-9.4220533,5.2880603],[-9.4217299,5.2878118],[-9.4212031,5.2876338],[-9.4204944,5.2873363],[-9.4200477,5.2867564],[-9.4197334,5.2862471],[-9.4193051,5.2858115],[-9.418427,5.2851549],[-9.4180388,5.2847224],[-9.4178693,5.2842468],[-9.4173302,5.2825318],[-9.4173179,5.2819121],[-9.4172932,5.2814795],[-9.4173764,5.2812955],[-9.4175177,5.2809933],[-9.4177148,5.2806835],[-9.4181654,5.2802455],[-9.4182566,5.2797594],[-9.4180635,5.2793908],[-9.4176021,5.2791398],[-9.4157783,5.2794408],[-9.4145083,5.279605],[-9.4133415,5.279808],[-9.4130357,5.279792],[-9.4118475,5.2798988],[-9.4114935,5.2796798],[-9.4113486,5.2792845],[-9.4113592,5.2785046],[-9.4108014,5.2775057],[-9.4102275,5.2762237],[-9.4103026,5.2751661],[-9.4105599,5.2745144],[-9.410796,5.2745197],[-9.4112842,5.2750058],[-9.4118689,5.275946],[-9.4124751,5.276619],[-9.4128936,5.2768701],[-9.4131993,5.2766724],[-9.414004,5.2761703],[-9.4150983,5.2755453],[-9.4159352,5.2748616],[-9.4166942,5.2737345],[-9.4166607,5.2732084],[-9.4157568,5.2718676],[-9.4153974,5.2708393],[-9.4151332,5.269807],[-9.4151426,5.2690552],[-9.4152931,5.2683231],[-9.4158323,5.2678671],[-9.4162348,5.2678297],[-9.4167122,5.2680701],[-9.4170494,5.2685376],[-9.4173665,5.2692623],[-9.4177893,5.2699748],[-9.4184275,5.2707075],[-9.4195456,5.2721163],[-9.420063,5.2744879],[-9.4207611,5.2758245],[-9.4220743,5.2767151],[-9.4230419,5.276869],[-9.4239728,5.2766261],[-9.4263278,5.2758727],[-9.4267346,5.2760077],[-9.4274679,5.2764617],[-9.4305618,5.2773923],[-9.431221,5.277327]]]]}]}
