# Supplementary material
Source: ML conference proceedings conference paper supplement (https://proceedings.neurips.cc/paper_files/paper/2022/hash/9d3faa41886997cfc2128b930077fa49-Abstract.html)
Supplement: Supplementary file 1 [file 9d3faa41886997cfc2128b930077fa49-Supplemental-Conference.zip › code/ebola/map/geojson/tonkolili.geojson]

{"type":"GeometryCollection","geometries":[{"type":"MultiPolygon","coordinates":[[[[-12.6461045,8.3670943],[-12.6425128,8.3699227],[-12.635643,8.3721692],[-12.6331669,8.3783341],[-12.6325176,8.3799505],[-12.6314938,8.3898305],[-12.6279979,8.406063],[-12.6218558,8.4263062],[-12.6217304,8.4267902],[-12.6193281,8.4367297],[-12.6180842,8.4470942],[-12.608931,8.485658],[-12.6079108,8.4878355],[-12.6050113,8.4940244],[-12.6016387,8.496925],[-12.5975386,8.4923459],[-12.5926369,8.4888498],[-12.5891492,8.488943],[-12.5828336,8.4831161],[-12.5823479,8.4821018],[-12.5820066,8.4810395],[-12.5817568,8.4797961],[-12.5813293,8.479222],[-12.5808995,8.4787096],[-12.5808877,8.4784243],[-12.5811526,8.4781099],[-12.5810526,8.477516],[-12.5812998,8.4771724],[-12.5815139,8.4763567],[-12.5815471,8.4756818],[-12.5812292,8.4751578],[-12.5812998,8.474593],[-12.5811939,8.4739408],[-12.5805051,8.4736264],[-12.5804992,8.4729102],[-12.5804815,8.4722406],[-12.5801401,8.4717573],[-12.5794749,8.4711051],[-12.5791864,8.4705345],[-12.5792217,8.4702317],[-12.5795985,8.4699347],[-12.579728,8.4695679],[-12.5795985,8.4690438],[-12.5792335,8.4686071],[-12.5793041,8.4680423],[-12.5793865,8.4675066],[-12.579157,8.4668253],[-12.5701116,8.4630165],[-12.568112,8.4545116],[-12.5661123,8.4461055],[-12.5613132,8.4434023],[-12.5602134,8.4404024],[-12.5553144,8.4404353],[-12.5512486,8.4362931],[-12.5462106,8.4330183],[-12.5403673,8.4359485],[-12.5361681,8.4464317],[-12.5339959,8.4506513],[-12.532609,8.4524756],[-12.5310772,8.4534196],[-12.5179421,8.4567254],[-12.5007029,8.4620783],[-12.4912381,8.4664693],[-12.4804953,8.4717712],[-12.4656468,8.4786873],[-12.4593057,8.4816941],[-12.4462522,8.4878838],[-12.4115957,8.4935578],[-12.3928318,8.5059697],[-12.3770875,8.5161535],[-12.358157,8.529183],[-12.3375364,8.541286],[-12.3144786,8.5490168],[-12.2847174,8.5724404],[-12.2954898,8.5798424],[-12.3057002,8.5868585],[-12.3176141,8.5907266],[-12.3256356,8.6089942],[-12.3297685,8.6244743],[-12.3295634,8.6343873],[-12.3478859,8.630227],[-12.3576268,8.6396963],[-12.3812492,8.6450099],[-12.3998487,8.6537404],[-12.3986451,8.6684978],[-12.3972264,8.6687002],[-12.393292,8.6686424],[-12.3916686,8.6682231],[-12.3907033,8.6681653],[-12.3897526,8.6684689],[-12.3891529,8.6691195],[-12.3886556,8.6701461],[-12.3885386,8.6710136],[-12.3886995,8.6724161],[-12.3893723,8.6749898],[-12.3903376,8.6770284],[-12.3912298,8.6787345],[-12.3913468,8.6798333],[-12.3912737,8.680831],[-12.3904985,8.6820599],[-12.3889189,8.6840118],[-12.3868567,8.6862817],[-12.3853794,8.6886384],[-12.3845458,8.6905902],[-12.3840605,8.6918023],[-12.3841362,8.6948264],[-12.3845311,8.6970239],[-12.3855111,8.6995107],[-12.3855111,8.7003492],[-12.384575,8.7018962],[-12.3831709,8.7032552],[-12.3799651,8.7056402],[-12.3794354,8.7059402],[-12.3787082,8.706432],[-12.3781546,8.7061681],[-12.3777009,8.7060454],[-12.3776277,8.7051202],[-12.3775491,8.7041274],[-12.3778681,8.702988],[-12.3778746,8.7016233],[-12.3776597,8.7006512],[-12.3774383,8.6997113],[-12.3761944,8.6981661],[-12.3747026,8.696836],[-12.3725683,8.6955254],[-12.3704903,8.6948119],[-12.3663219,8.693077],[-12.3652835,8.6928601],[-12.3635869,8.6929035],[-12.360925,8.6938722],[-12.3569175,8.6955203],[-12.3534219,8.6967493],[-12.3498386,8.697848],[-12.348493,8.6987878],[-12.3454654,8.701766],[-12.342745,8.7041949],[-12.339776,8.7061466],[-12.3375675,8.7077948],[-12.336529,8.7089803],[-12.3358709,8.7101658],[-12.3353882,8.7139535],[-12.3355345,8.7164112],[-12.335593,8.7178135],[-12.3353151,8.7184641],[-12.3345838,8.7190279],[-12.3336916,8.7191291],[-12.3330697,8.7188177],[-12.3321705,8.7182473],[-12.3304593,8.7157607],[-12.327929,8.7128693],[-12.3251062,8.7102381],[-12.3224297,8.7083586],[-12.3211719,8.7074912],[-12.320543,8.7073177],[-12.3194753,8.7074044],[-12.3185977,8.7079104],[-12.3175154,8.7090092],[-12.3161844,8.7108886],[-12.3147365,8.7125512],[-12.3141953,8.7135198],[-12.3138298,8.7147487],[-12.3140929,8.7159197],[-12.3147365,8.7167293],[-12.3162137,8.7175244],[-12.3177348,8.7177702],[-12.3196654,8.7181027],[-12.3212742,8.7189123],[-12.3229124,8.7200544],[-12.3237021,8.720994],[-12.3241263,8.7220349],[-12.3242726,8.7237842],[-12.3239215,8.7250564],[-12.3231317,8.7267189],[-12.3221664,8.7277742],[-12.3209086,8.728497],[-12.3182174,8.7299138],[-12.3162283,8.7310558],[-12.3142685,8.7328918],[-12.3127475,8.7347132],[-12.3112409,8.7373443],[-12.3101818,8.7395314],[-12.3095696,8.7422788],[-12.3094819,8.7488996],[-12.3089407,8.7525424],[-12.3076244,8.7558816],[-12.3068492,8.7569224],[-12.3056353,8.7595099],[-12.3052111,8.7603628],[-12.3043921,8.7611433],[-12.3033829,8.7615336],[-12.3023445,8.7616782],[-12.3011159,8.7614469],[-12.299039,8.7607675],[-12.2979128,8.7602038],[-12.297123,8.7594665],[-12.2959676,8.7570236],[-12.2950023,8.7540891],[-12.2939346,8.7494778],[-12.2934666,8.7477865],[-12.2927646,8.7467745],[-12.290907,8.7451122],[-12.2893713,8.7442159],[-12.2880842,8.7438111],[-12.2868849,8.743869],[-12.2856856,8.7442593],[-12.2842961,8.7457193],[-12.2830383,8.7472083],[-12.2810638,8.7493477],[-12.2787383,8.7511691],[-12.276559,8.7528026],[-12.2746138,8.7532941],[-12.2734876,8.7532941],[-12.2721713,8.7530194],[-12.2707526,8.7520654],[-12.2694216,8.7508655],[-12.2690609,8.7506513],[-12.2679883,8.7499404],[-12.2669498,8.7491019],[-12.2665842,8.748119],[-12.2665549,8.7469914],[-12.2672716,8.7453001],[-12.2688512,8.7431462],[-12.2709866,8.7388383],[-12.2715716,8.7370168],[-12.2717618,8.7342412],[-12.2712206,8.7294562],[-12.2708111,8.7264637],[-12.2709427,8.7249746],[-12.2713084,8.7234856],[-12.2720982,8.7227628],[-12.2746431,8.7220544],[-12.2776267,8.7208978],[-12.2790747,8.7198714],[-12.2798645,8.7188739],[-12.2802009,8.7172981],[-12.2801863,8.7157801],[-12.2799961,8.7137561],[-12.280157,8.7118622],[-12.2799961,8.7111105],[-12.2790016,8.7103587],[-12.2778754,8.7101418],[-12.2763689,8.7103009],[-12.2738971,8.7107346],[-12.2707087,8.7119056],[-12.2690267,8.7125996],[-12.2673301,8.7138862],[-12.2659845,8.7151295],[-12.2647413,8.7171824],[-12.2637175,8.7192787],[-12.2631471,8.7212014],[-12.2625913,8.7240494],[-12.2622403,8.7271142],[-12.2627522,8.7309885],[-12.2630155,8.7381877],[-12.2626352,8.7403128],[-12.2616992,8.7432618],[-12.2612019,8.7442882],[-12.2602805,8.7451266],[-12.2593151,8.7454013],[-12.2582475,8.7453724],[-12.2572383,8.7448664],[-12.2564192,8.7442014],[-12.2550298,8.7424234],[-12.2530586,8.7399308],[-12.2515487,8.737457],[-12.2505352,8.7351673],[-12.2494555,8.7308887],[-12.2481321,8.7300276],[-12.2417534,8.7210586],[-12.2376285,8.7207485],[-12.2345852,8.7196914],[-12.2344782,8.7196543],[-12.231662,8.7186758],[-12.2298146,8.7155913],[-12.2276428,8.7152458],[-12.2247219,8.7135432],[-12.2231536,8.7137323],[-12.2208853,8.7135578],[-12.2202178,8.7140014],[-12.2201086,8.7149362],[-12.2197761,8.7156987],[-12.2203863,8.7166314],[-12.2208068,8.7181973],[-12.2204008,8.7210239],[-12.2190063,8.7236063],[-12.217327,8.7251762],[-12.2144343,8.7273752],[-12.211504,8.7287187],[-12.209474,8.7280033],[-12.2070132,8.7249621],[-12.2062241,8.723239],[-12.2040018,8.7217742],[-12.1945577,8.7234144],[-12.1857626,8.7210657],[-12.1634148,8.735522],[-12.1449009,8.7080618],[-12.1304987,8.7030157],[-12.1181698,8.662138],[-12.1162565,8.6627719],[-12.1146949,8.6630786],[-12.1132367,8.66314],[-12.1119749,8.6628946],[-12.1105787,8.6627208],[-12.1095032,8.6627821],[-12.108469,8.6633751],[-12.1075795,8.6644486],[-12.1067625,8.6656244],[-12.10608,8.6668717],[-12.1055835,8.6687018],[-12.1050457,8.6714316],[-12.1040943,8.6730163],[-12.1031532,8.6741307],[-12.102174,8.6744774],[-12.1009503,8.6746623],[-12.0991247,8.6746395],[-12.0984579,8.6746418],[-12.0965239,8.6749486],[-12.0947451,8.6756642],[-12.0906703,8.6773205],[-12.0876711,8.6786802],[-12.0851476,8.6802853],[-12.083255,8.6813792],[-12.0815279,8.6818904],[-12.0808189,8.6823109],[-12.0801879,8.6826906],[-12.0795984,8.6827587],[-12.0788099,8.6825922],[-12.0782358,8.6822819],[-12.077642,8.681834],[-12.0770912,8.6813895],[-12.0758398,8.6806022],[-12.0748469,8.6800297],[-12.0739886,8.6800502],[-12.0730991,8.6803058],[-12.0724579,8.6806227],[-12.0719098,8.6813383],[-12.0716823,8.6822482],[-12.071703,8.6832706],[-12.0719201,8.6842112],[-12.0726544,8.6855198],[-12.0738541,8.6873089],[-12.0744643,8.6889548],[-12.0749193,8.6903554],[-12.0749297,8.6925432],[-12.0746401,8.6956817],[-12.0739265,8.6988202],[-12.0731302,8.701284],[-12.0724269,8.7022961],[-12.0714237,8.7031037],[-12.0701723,8.7036864],[-12.0689841,8.7040664],[-12.0684556,8.7042078],[-12.0642877,8.7042998],[-12.0618366,8.7042895],[-12.0611851,8.7040749],[-12.060699,8.7037477],[-12.060306,8.7031037],[-12.0602957,8.7022245],[-12.0609576,8.7007115],[-12.0617849,8.6992292],[-12.0623951,8.6974912],[-12.0628812,8.6956102],[-12.0630777,8.6939745],[-12.0629432,8.6928295],[-12.0622917,8.6893944],[-12.0619005,8.6882783],[-12.0615988,8.6871657],[-12.0611127,8.6863683],[-12.0605025,8.685806],[-12.059944,8.6855811],[-12.0590339,8.6856424],[-12.0582583,8.6859491],[-12.0576689,8.6864807],[-12.0568931,8.6878405],[-12.0561071,8.6890059],[-12.0552694,8.6899465],[-12.0538319,8.6909279],[-12.0527873,8.6914391],[-12.0502913,8.6919351],[-12.0490776,8.6921551],[-12.0470345,8.692245],[-12.0451633,8.6921251],[-12.0438888,8.6920351],[-12.0423413,8.6916951],[-12.0412793,8.6912552],[-12.0406623,8.6907453],[-12.0398936,8.6896955],[-12.0397014,8.6889656],[-12.0398531,8.6874458],[-12.0403083,8.6853761],[-12.0405409,8.6832964],[-12.0409253,8.6819766],[-12.0407938,8.6810967],[-12.0404196,8.6804068],[-12.0394276,8.6795195],[-12.0386799,8.679137],[-12.037628,8.6786971],[-12.0361917,8.6787171],[-12.0351196,8.678937],[-12.034189,8.679497],[-12.03251,8.6809968],[-12.0313671,8.6826465],[-12.0305276,8.6843463],[-12.0294858,8.6872958],[-12.0288991,8.6881256],[-12.0280799,8.6886456],[-12.0275236,8.6887356],[-12.0268054,8.6886756],[-12.0261379,8.6882857],[-12.0258749,8.6878658],[-12.0257434,8.6870159],[-12.0259963,8.6854761],[-12.026781,8.6833202],[-12.0268155,8.6828165],[-12.0265121,8.6825365],[-12.0259558,8.6825165],[-12.0245701,8.6827265],[-12.0228304,8.6831865],[-12.0215054,8.6836764],[-12.0209934,8.6836581],[-12.0203321,8.6833764],[-12.0193915,8.6824265],[-12.0177631,8.6808567],[-12.0159526,8.6800769],[-12.0149334,8.6797694],[-12.0132722,8.679437],[-12.0113812,8.6794544],[-12.0100659,8.679527],[-12.0085184,8.6799569],[-12.0064753,8.6808568],[-12.0043007,8.6821466],[-12.0015495,8.6837964],[-12.0009224,8.6845563],[-12.0004976,8.6852262],[-12.0002129,8.6862603],[-11.9995886,8.6898518],[-11.9995367,8.6930349],[-11.999051,8.6957232],[-11.9978839,8.6996077],[-11.9969483,8.7015418],[-11.9948282,8.7043373],[-11.992934,8.7057761],[-11.9894955,8.7082886],[-11.981917,8.7107485],[-11.9735917,8.7150733],[-11.9712169,8.7178024],[-11.9670115,8.7202451],[-11.9630533,8.7222179],[-11.9596305,8.7234809],[-11.9561916,8.7244906],[-11.9516409,8.7264394],[-11.9503863,8.7274532],[-11.9494204,8.728463],[-11.9488337,8.7295276],[-11.9473779,8.7314151],[-11.946649,8.7319521],[-11.9460569,8.7328985],[-11.9454602,8.7333885],[-11.9439582,8.733848],[-11.9429356,8.7340248],[-11.9392177,8.7361272],[-11.9347405,8.7388276],[-11.9270956,8.7430275],[-11.9242859,8.7449761],[-11.9227328,8.7462553],[-11.9215098,8.7477115],[-11.9215069,8.7488479],[-11.9210504,8.7502485],[-11.9202737,8.7502485],[-11.918558,8.7495568],[-11.9179435,8.7490499],[-11.9174403,8.7483901],[-11.9161315,8.7471177],[-11.9147368,8.7468844],[-11.913049,8.7475065],[-11.9117115,8.7483618],[-11.9114469,8.7497685],[-11.9105744,8.7518043],[-11.9103956,8.753112],[-11.9100165,8.7549358],[-11.9095945,8.7552963],[-11.9087291,8.7552963],[-11.9081498,8.7549852],[-11.9075133,8.7541935],[-11.9071199,8.7530908],[-11.9065764,8.7525395],[-11.9056109,8.7524405],[-11.904252,8.7524688],[-11.9028859,8.7528505],[-11.901806,8.7535291],[-11.9013411,8.7543491],[-11.9012839,8.7554801],[-11.9009192,8.7569892],[-11.8992336,8.7600029],[-11.8974231,8.7619322],[-11.8960576,8.7635616],[-11.8935897,8.7647012],[-11.8919256,8.7666925],[-11.889929,8.7682312],[-11.8892954,8.76893],[-11.8883092,8.7693378],[-11.8877718,8.7695924],[-11.8871702,8.7707123],[-11.8869744,8.7735466],[-11.8870723,8.7753854],[-11.887436,8.776132],[-11.8883873,8.7764776],[-11.8893063,8.7773369],[-11.8893106,8.7785929],[-11.8891048,8.7802333],[-11.889005,8.7808942],[-11.8886692,8.7815992],[-11.8882845,8.7817997],[-11.8879138,8.7817928],[-11.8870899,8.7814099],[-11.886263,8.7803411],[-11.8854231,8.7794549],[-11.8846403,8.7792351],[-11.8834931,8.7795669],[-11.8829196,8.7804517],[-11.8817025,8.7821937],[-11.8807093,8.7839772],[-11.8804994,8.7855395],[-11.8802896,8.7888575],[-11.8805694,8.7911801],[-11.8813808,8.7925626],[-11.8822621,8.7930603],[-11.8841506,8.7935165],[-11.88506,8.7945949],[-11.8851159,8.7964059],[-11.8851373,8.7983572],[-11.8850048,8.7989357],[-11.8838709,8.7998897],[-11.8833533,8.8011478],[-11.8828296,8.8029495],[-11.8826538,8.8046039],[-11.8825366,8.8056264],[-11.8825845,8.8064297],[-11.8830279,8.807359],[-11.883594,8.8082506],[-11.8841908,8.8095957],[-11.8845563,8.8113226],[-11.8851019,8.8146265],[-11.8848579,8.8169225],[-11.8847926,8.8178567],[-11.8853537,8.8201853],[-11.8856335,8.8223072],[-11.8862071,8.8232956],[-11.8864799,8.8260327],[-11.8857874,8.8282722],[-11.8853607,8.8291569],[-11.8842643,8.8300584],[-11.8830467,8.8324784],[-11.8826773,8.8341277],[-11.8826773,8.8361421],[-11.8831835,8.8370614],[-11.8836635,8.8378546],[-11.883977,8.8383727],[-11.8847021,8.8391704],[-11.8847432,8.839995],[-11.8841001,8.841739],[-11.8830728,8.8434762],[-11.882918,8.8440976],[-11.8830824,8.8452829],[-11.8831889,8.8464492],[-11.8829663,8.847233],[-11.8825407,8.8481794],[-11.8820183,8.8492691],[-11.8819796,8.8499861],[-11.8823472,8.851114],[-11.8825987,8.8520699],[-11.8824246,8.8527678],[-11.8817087,8.853609],[-11.8807219,8.8542494],[-11.8804735,8.85472],[-11.8805117,8.8554479],[-11.8805995,8.8561795],[-11.8817667,8.8572796],[-11.8833823,8.8585987],[-11.8844078,8.8597936],[-11.8846207,8.8604149],[-11.8842724,8.860912],[-11.8835275,8.8615142],[-11.8823375,8.8621738],[-11.880896,8.8625943],[-11.8792417,8.8631105],[-11.8779454,8.8638561],[-11.8773262,8.8646208],[-11.8760686,8.8667428],[-11.8751205,8.8684347],[-11.8739499,8.8694002],[-11.8725471,8.8708817],[-11.8720924,8.872153],[-11.8718506,8.8742846],[-11.8719473,8.875986],[-11.8716184,8.8770183],[-11.8709025,8.8774006],[-11.8697222,8.8778308],[-11.8691321,8.8777256],[-11.8684065,8.8774293],[-11.8679808,8.8777065],[-11.8675358,8.8785668],[-11.8674391,8.8794175],[-11.8673617,8.8805358],[-11.8676519,8.8817784],[-11.8683098,8.883929],[-11.8685806,8.8892051],[-11.8687838,8.8909638],[-11.8690547,8.8925122],[-11.8684839,8.8941657],[-11.868155,8.8956855],[-11.8683872,8.8966317],[-11.8693256,8.8983999],[-11.8709122,8.902223],[-11.8714055,8.9028443],[-11.8724794,8.9032553],[-11.8730695,8.9037332],[-11.8732533,8.9043926],[-11.8732146,8.9054918],[-11.872847,8.9086458],[-11.8725761,8.9111527],[-11.8727779,8.9124195],[-11.8732863,8.9139463],[-11.8737814,8.9158564],[-11.8739687,8.9176872],[-11.8737948,8.919604],[-11.8733595,8.9211623],[-11.8734536,8.9226839],[-11.8738818,8.9243032],[-11.8738149,8.9251492],[-11.8732462,8.926471],[-11.8725838,8.9280176],[-11.8721624,8.9292403],[-11.8720486,8.9303837],[-11.8723296,8.9315138],[-11.8725036,8.9328819],[-11.8721757,8.9342302],[-11.871781,8.9357767],[-11.8715402,8.9371514],[-11.8716405,8.9386516],[-11.8713328,8.9397289],[-11.870637,8.9409714],[-11.8702699,8.942069],[-11.8702366,8.9429825],[-11.8705078,8.9438509],[-11.8710518,8.9445336],[-11.8718078,8.9447187],[-11.8724902,8.9444477],[-11.873487,8.9442759],[-11.8744036,8.9444675],[-11.8749254,8.944983],[-11.8751663,8.9462784],[-11.8750057,8.94723],[-11.8741761,8.9483734],[-11.8728381,8.9497348],[-11.8721222,8.9502437],[-11.8718479,8.9507525],[-11.8720018,8.9514795],[-11.8721502,8.9519663],[-11.873186,8.9528806],[-11.8746846,8.9537331],[-11.8773741,8.9546253],[-11.8792072,8.9549755],[-11.8802576,8.9553721],[-11.880716,8.9557996],[-11.8808853,8.9571263],[-11.8804862,8.9579794],[-11.8801852,8.9588003],[-11.8797534,8.959479],[-11.8796356,8.9600542],[-11.8800478,8.9609655],[-11.8808003,8.961935],[-11.8817032,8.9628269],[-11.8829202,8.9638351],[-11.8839344,8.964126],[-11.8848373,8.9643587],[-11.8854066,8.9649597],[-11.8856199,8.9659899],[-11.88593,8.9679457],[-11.8864666,8.9691672],[-11.8865385,8.9698975],[-11.8861787,8.9706473],[-11.8854655,8.9711772],[-11.8845429,8.9720433],[-11.8837839,8.9729352],[-11.8830511,8.9732777],[-11.8820611,8.9734212],[-11.880833,8.9735491],[-11.8790075,8.9733487],[-11.8767632,8.9732001],[-11.8757621,8.9728964],[-11.8745124,8.9721984],[-11.8734982,8.9720691],[-11.8722877,8.9725086],[-11.8708286,8.9735297],[-11.869435,8.9738464],[-11.86865,8.9743132],[-11.8681591,8.9749581],[-11.8677861,8.97585],[-11.8672823,8.9773364],[-11.8667196,8.9784933],[-11.8666541,8.9802253],[-11.8659148,8.9811237],[-11.8657577,8.9822741],[-11.8662943,8.983418],[-11.8669551,8.9842646],[-11.8678074,8.9848412],[-11.8689966,8.9848527],[-11.8698668,8.9851371],[-11.8701874,8.9860225],[-11.8701285,8.9874314],[-11.8698603,8.9886981],[-11.8686694,8.9903267],[-11.8677963,8.99156],[-11.8670729,8.9922138],[-11.865568,8.9930474],[-11.8608766,8.9950638],[-11.8558973,8.9974614],[-11.8540941,8.9988459],[-11.8533339,8.999637],[-11.8525255,9.0001146],[-11.8515388,9.0003539],[-11.8480592,9.0005148],[-11.8467967,9.0006085],[-11.8459732,9.0004075],[-11.8449778,9.0000232],[-11.84448,8.9993841],[-11.8439189,8.9983875],[-11.843833,8.9974355],[-11.8433443,8.9962155],[-11.8424981,8.9961037],[-11.8418058,8.9961529],[-11.8410321,8.9965596],[-11.8396656,8.9975875],[-11.8369688,9.000412],[-11.8349778,9.0027091],[-11.8344825,9.0039143],[-11.834268,9.0042056],[-11.8338466,9.0047648],[-11.8331153,9.0050529],[-11.8323679,9.0050391],[-11.8318178,9.0053283],[-11.8313056,9.0061973],[-11.8307748,9.0070866],[-11.8301493,9.0075921],[-11.8295616,9.0083878],[-11.8292678,9.0090899],[-11.8292678,9.0096703],[-11.8298081,9.0105689],[-11.830244,9.0111961],[-11.8305473,9.0120012],[-11.8308412,9.0130964],[-11.8309644,9.014641],[-11.8313151,9.0158486],[-11.8318648,9.016766],[-11.8323292,9.0177769],[-11.8328505,9.0185539],[-11.8333149,9.0190407],[-11.8334192,9.0194993],[-11.8332676,9.020164],[-11.8325662,9.0212405],[-11.8319501,9.0219144],[-11.8314762,9.0222982],[-11.8309265,9.0225135],[-11.8299407,9.0225884],[-11.8290688,9.0226352],[-11.8280925,9.022317],[-11.8266139,9.0216711],[-11.8253913,9.0207163],[-11.8244529,9.0197427],[-11.8235999,9.0189471],[-11.8232303,9.0183199],[-11.8226521,9.0176178],[-11.8218749,9.0174493],[-11.8213631,9.0179173],[-11.8210313,9.0184041],[-11.8206427,9.0190407],[-11.8205764,9.0202389],[-11.8206807,9.0215868],[-11.8211356,9.0224106],[-11.8216095,9.0231875],[-11.822491,9.0238896],[-11.8231544,9.0244606],[-11.8235525,9.025743],[-11.8237231,9.0273343],[-11.8236757,9.0285699],[-11.823363,9.0292439],[-11.8229271,9.029637],[-11.8221877,9.0295154],[-11.8211356,9.0290099],[-11.820093,9.0278024],[-11.8191357,9.0267446],[-11.8184249,9.025612],[-11.8182164,9.0246197],[-11.8181216,9.0227476],[-11.8175813,9.0213996],[-11.8172117,9.0207163],[-11.8172117,9.0198738],[-11.8175624,9.0189845],[-11.8173728,9.0183199],[-11.8165578,9.0179548],[-11.8156857,9.0178425],[-11.8144441,9.018142],[-11.8132119,9.0179735],[-11.8121693,9.0174493],[-11.8112879,9.0165507],[-11.8107287,9.0159515],[-11.8096482,9.0155116],[-11.8091363,9.0154648],[-11.8083117,9.0151559],[-11.80798,9.0145474],[-11.8066341,9.0136768],[-11.8054399,9.0134615],[-11.8044636,9.0131245],[-11.8030988,9.0129092],[-11.8016013,9.0132743],[-11.7995919,9.0137517],[-11.7985778,9.0138921],[-11.7983029,9.0143976],[-11.7981986,9.0147908],[-11.7982555,9.0151465],[-11.7984071,9.0156146],[-11.7990232,9.0168221],[-11.7994876,9.0174025],[-11.7995147,9.0180191],[-11.7993455,9.0186475],[-11.7991275,9.0197146],[-11.7985778,9.0203886],[-11.7974025,9.0209035],[-11.7963504,9.0213154],[-11.7949382,9.0214745],[-11.7934311,9.0214464],[-11.7922843,9.021746],[-11.7909195,9.0225042],[-11.7896968,9.0234215],[-11.7883225,9.0242453],[-11.7879812,9.0251065],[-11.7878012,9.0277649],[-11.7879339,9.028935],[-11.7876306,9.029974],[-11.7874126,9.0303672],[-11.7871756,9.0307603],[-11.7863416,9.0312563],[-11.7858676,9.0315841],[-11.7849577,9.0316964],[-11.7838678,9.0315747],[-11.7829485,9.0315372],[-11.7817731,9.0317993],[-11.7811003,9.0318835],[-11.7806926,9.0324546],[-11.7805695,9.0334093],[-11.7806452,9.0344858],[-11.7808537,9.0348509],[-11.7814129,9.03545],[-11.7816879,9.0359179],[-11.7820954,9.0371068],[-11.7820964,9.0377912],[-11.7819532,9.038567],[-11.7815362,9.039868],[-11.7808348,9.0408509],[-11.7786833,9.0417868],[-11.7772615,9.0423579],[-11.7751101,9.0429756],[-11.7734987,9.0431723],[-11.7727785,9.0430598],[-11.7717549,9.0425263],[-11.7706837,9.0419273],[-11.7699161,9.0417868],[-11.7691578,9.0424983],[-11.7685134,9.0434155],[-11.7678215,9.0445107],[-11.7679256,9.046439],[-11.7681247,9.0481145],[-11.7683048,9.0496962],[-11.7687124,9.0513735],[-11.7696697,9.053721],[-11.7696696,9.0543015],[-11.7687312,9.0551064],[-11.7670442,9.0559206],[-11.7651485,9.0564262],[-11.7627696,9.0563699],[-11.7687438,9.0693303],[-11.777438,9.0773741],[-11.796558,9.0786655],[-11.8258618,9.0909902],[-11.8312885,9.1365342],[-11.8307458,9.1697509],[-11.8096572,9.2086265],[-11.7740918,9.2036367],[-11.7534706,9.2079221],[-11.738276,9.2229205],[-11.7355627,9.2689832],[-11.7171079,9.2918667],[-11.7169416,9.2912457],[-11.716241,9.2888197],[-11.7158728,9.2873898],[-11.714994,9.2857256],[-11.7146615,9.2846827],[-11.714329,9.2832294],[-11.7137234,9.282034],[-11.7134384,9.2810729],[-11.713379,9.2801822],[-11.7135452,9.2791509],[-11.7133077,9.2781781],[-11.713189,9.2771116],[-11.7132602,9.2755763],[-11.7129634,9.2744863],[-11.712916,9.2733143],[-11.7127377,9.2714977],[-11.7126546,9.2706304],[-11.7129634,9.2702318],[-11.713474,9.2697748],[-11.7138184,9.2691771],[-11.7137709,9.2685793],[-11.713664,9.2681926],[-11.713379,9.2674424],[-11.7137353,9.2667627],[-11.7138184,9.2656727],[-11.7136878,9.2652039],[-11.7135215,9.2640201],[-11.713747,9.2628124],[-11.7137471,9.2611955],[-11.7136046,9.2571752],[-11.712999,9.2533895],[-11.7125596,9.2524166],[-11.7121202,9.2509633],[-11.7115621,9.2486307],[-11.7113483,9.2464038],[-11.7108258,9.2421841],[-11.7105052,9.2396173],[-11.7100301,9.2366517],[-11.7097808,9.2345536],[-11.7094364,9.2315411],[-11.709092,9.229068],[-11.7092464,9.2255162],[-11.7094958,9.2227733],[-11.7094364,9.2206283],[-11.709947,9.2182721],[-11.7094839,9.2139466],[-11.7102201,9.2107466],[-11.7095433,9.2098908],[-11.7094839,9.2080621],[-11.7093176,9.2055418],[-11.7086289,9.2039593],[-11.7080588,9.2021305],[-11.7076551,9.2005949],[-11.7087357,9.1993406],[-11.7091458,9.1979815],[-11.7092582,9.1972658],[-11.7088307,9.1952025],[-11.7073819,9.1946516],[-11.7061944,9.1930572],[-11.7073226,9.1907361],[-11.7071207,9.1890012],[-11.7072632,9.1877468],[-11.7072751,9.1853435],[-11.7073107,9.1828349],[-11.7079757,9.180584],[-11.7079876,9.1774422],[-11.7083201,9.1754843],[-11.7082948,9.1748476],[-11.7081538,9.1724245],[-11.7073819,9.1711466],[-11.7074888,9.1697633],[-11.7082132,9.1689661],[-11.7084863,9.1678874],[-11.7087001,9.1661876],[-11.7081301,9.1652731],[-11.7082875,9.1637501],[-11.7091632,9.1625062],[-11.7090326,9.1605367],[-11.7081182,9.1588015],[-11.7084388,9.1568671],[-11.7084745,9.1543347],[-11.7092107,9.1524588],[-11.7090682,9.1492932],[-11.7079638,9.1480974],[-11.7077331,9.1475817],[-11.7077382,9.1471477],[-11.7093532,9.1460925],[-11.710042,9.1448498],[-11.7102795,9.1432084],[-11.7101489,9.142282],[-11.7112414,9.1389523],[-11.7120252,9.1371233],[-11.7120965,9.1356694],[-11.712999,9.1345087],[-11.714139,9.1338287],[-11.7142934,9.133219],[-11.7138184,9.1320699],[-11.7127733,9.1306982],[-11.7128802,9.1288925],[-11.7128565,9.1276496],[-11.7135096,9.1260433],[-11.7135571,9.1240618],[-11.7142578,9.1215292],[-11.7148872,9.1198408],[-11.7158134,9.1175309],[-11.7159322,9.1163818],[-11.7161839,9.1152783],[-11.7168941,9.1144471],[-11.7171928,9.1138336],[-11.717381,9.1131924],[-11.6885952,9.0999787],[-11.6710513,9.085421],[-11.6477412,9.057464],[-11.6275134,9.0726682],[-11.5845371,9.1297655],[-11.5717131,9.1389692],[-11.5538325,9.1430095],[-11.5209715,9.167868],[-11.4986615,9.1821136],[-11.4833298,9.1829613],[-11.4537841,9.1699619],[-11.4532359,9.1689367],[-11.4439517,9.151573],[-11.4445948,9.1337398],[-11.4422331,9.1022337],[-11.4450681,9.0716482],[-11.4459703,9.0563049],[-11.4455047,9.0486963],[-11.4465597,9.0407253],[-11.4422522,9.027278],[-11.4423644,9.0268031],[-11.4423444,9.0264391],[-11.442136,9.0261779],[-11.4415951,9.026071],[-11.44095,9.0259286],[-11.4400604,9.0257109],[-11.4394514,9.0254656],[-11.4391789,9.0252004],[-11.4393191,9.0249036],[-11.4396637,9.0244802],[-11.439816,9.0240766],[-11.439844,9.0236175],[-11.4397599,9.022921],[-11.43982,9.0225015],[-11.4399482,9.0218525],[-11.4400764,9.0213104],[-11.4401926,9.0206891],[-11.4400083,9.0202379],[-11.4400564,9.0199134],[-11.4402327,9.0197512],[-11.4405573,9.0195691],[-11.4408097,9.0194544],[-11.4408818,9.019114],[-11.4408177,9.0186392],[-11.4408097,9.0181801],[-11.4408297,9.0177369],[-11.4404852,9.0173372],[-11.4399843,9.0171156],[-11.4398681,9.0168029],[-11.4396237,9.0164784],[-11.4391869,9.0160787],[-11.4386099,9.0158452],[-11.4382052,9.0157859],[-11.4377284,9.0157384],[-11.43748,9.0158769],[-11.4372676,9.0159283],[-11.4371274,9.0157977],[-11.4371033,9.0153941],[-11.4371875,9.0150617],[-11.4370031,9.0147965],[-11.4368469,9.0143493],[-11.4367988,9.0140842],[-11.4367828,9.0137913],[-11.4368108,9.0135381],[-11.4369711,9.0131898],[-11.4372395,9.0129405],[-11.437528,9.0127743],[-11.437488,9.0124814],[-11.4372476,9.0122084],[-11.4372115,9.0118245],[-11.4373758,9.0113733],[-11.4375761,9.0109341],[-11.4377204,9.0105937],[-11.4378606,9.0103602],[-11.438077,9.0101663],[-11.4383334,9.010103],[-11.4386981,9.0103048],[-11.4389585,9.0102771],[-11.4390306,9.0100951],[-11.4388784,9.0098655],[-11.4385819,9.0096716],[-11.4384176,9.0093629],[-11.4384016,9.0090266],[-11.438634,9.0086704],[-11.4390226,9.0084606],[-11.4395075,9.0085635],[-11.4397719,9.0088089],[-11.4399562,9.0086941],[-11.4400845,9.0083696],[-11.4399643,9.0081005],[-11.4397359,9.0078868],[-11.4395515,9.0076137],[-11.4396036,9.0073209],[-11.439808,9.0070359],[-11.4401462,9.0070066],[-11.4405549,9.0072678],[-11.4409396,9.007244],[-11.4413884,9.006785],[-11.4415406,9.0060647],[-11.4415086,9.0052574],[-11.4413804,9.0045134],[-11.4410518,9.0040859],[-11.4409236,9.003801],[-11.4410518,9.0032707],[-11.441196,9.0025583],[-11.4410037,9.0022892],[-11.4406431,9.0019805],[-11.4407473,9.0016243],[-11.4410919,9.0012444],[-11.4412361,9.0004291],[-11.4415246,9.0000809],[-11.4416608,8.9997089],[-11.4415647,8.9992656],[-11.4410999,8.999234],[-11.4406351,8.9995585],[-11.4404267,8.9991548],[-11.4406751,8.9987116],[-11.4414124,8.9982287],[-11.4419093,8.9978805],[-11.4420776,8.9975005],[-11.4416608,8.9969465],[-11.4418371,8.9965586],[-11.4422218,8.9966378],[-11.4428549,8.9970177],[-11.4431113,8.9968198],[-11.4433277,8.9961629],[-11.4431915,8.9957196],[-11.4427106,8.9951655],[-11.4420134,8.9949043],[-11.4419493,8.9946035],[-11.4420615,8.9940099],[-11.4424255,8.9936327],[-11.4425498,8.9928194],[-11.4427285,8.9921289],[-11.443078,8.9917069],[-11.4432062,8.9911008],[-11.4433654,8.9904486],[-11.4432062,8.9896929],[-11.443113,8.9892747],[-11.4432062,8.9889179],[-11.443245,8.9883233],[-11.4432411,8.9877517],[-11.4435091,8.9871762],[-11.444049,8.9864473],[-11.4445617,8.9858297],[-11.4453812,8.9855842],[-11.4462163,8.9858642],[-11.4475796,8.9861788],[-11.4487021,8.9861404],[-11.4497624,8.9862824],[-11.45031,8.9865241],[-11.450613,8.9869346],[-11.4508965,8.9873143],[-11.4512344,8.9876289],[-11.451918,8.9879282],[-11.452555,8.9882849],[-11.4531648,8.9884883],[-11.4536658,8.9884269],[-11.4535299,8.9878668],[-11.4534911,8.9872338],[-11.45386,8.9869154],[-11.4545397,8.9869499],[-11.4550951,8.9868617],[-11.455736,8.98662],[-11.4564856,8.9862709],[-11.4575382,8.9858565],[-11.4583033,8.9852581],[-11.4587966,8.9848668],[-11.458952,8.9843834],[-11.4585791,8.9841302],[-11.4580276,8.9842031],[-11.457511,8.9841801],[-11.4570138,8.9842453],[-11.4562526,8.9843412],[-11.4556739,8.9844141],[-11.4552233,8.9843565],[-11.4551418,8.9841532],[-11.4552932,8.9836123],[-11.4556622,8.9825688],[-11.4557326,8.9823943],[-11.4559846,8.9817708],[-11.456171,8.9809498],[-11.4563808,8.9802976],[-11.4564196,8.9796033],[-11.456474,8.9789511],[-11.4564817,8.9785636],[-11.4565517,8.977827],[-11.4565089,8.9772515],[-11.4565089,8.9766224],[-11.4566293,8.9760392],[-11.4567342,8.9753909],[-11.456909,8.9748691],[-11.4572585,8.9745737],[-11.4578334,8.974167],[-11.4580703,8.9738601],[-11.4582839,8.9734726],[-11.4582917,8.9730276],[-11.4581402,8.9727053],[-11.4576702,8.9722066],[-11.4572119,8.9717846],[-11.4567653,8.9715812],[-11.4563575,8.9716465],[-11.4564468,8.9711707],[-11.4567109,8.9708331],[-11.4573207,8.9703574],[-11.457612,8.9699584],[-11.4579732,8.9691911],[-11.4581519,8.9685466],[-11.457981,8.967856],[-11.457814,8.9671846],[-11.4575461,8.9663378],[-11.4571726,8.965627],[-11.4571762,8.9651773],[-11.4573959,8.9649033],[-11.4579781,8.964727],[-11.4581731,8.9645127],[-11.458489,8.9640515],[-11.458629,8.9637639],[-11.4587004,8.9633299],[-11.4589668,8.9630369],[-11.4594172,8.962676],[-11.4598704,8.9625567],[-11.4600572,8.9622067],[-11.4600681,8.9617564],[-11.460005,8.961344],[-11.4596836,8.9606794],[-11.4598297,8.9604065],[-11.4602492,8.9604449],[-11.4606414,8.9604027],[-11.4608279,8.960207],[-11.4608007,8.9597658],[-11.4604744,8.9595433],[-11.4601831,8.9594704],[-11.4598608,8.9594934],[-11.4596704,8.9592939],[-11.4599345,8.9590254],[-11.4605288,8.9588987],[-11.4615076,8.9586839],[-11.4619018,8.9584349],[-11.4622369,8.9578381],[-11.4629015,8.9579792],[-11.463632,8.9582342],[-11.4647526,8.9581582],[-11.465203,8.9580443],[-11.4658676,8.9574203],[-11.4665707,8.9566119],[-11.4666256,8.9559933],[-11.4663729,8.9549136],[-11.4661477,8.9538881],[-11.4664608,8.9532804],[-11.4668014,8.9523037],[-11.4669662,8.9516146],[-11.4670321,8.950817],[-11.4674715,8.9502039],[-11.4678505,8.9497752],[-11.467867,8.9491838],[-11.467499,8.9480823],[-11.4671694,8.9471219],[-11.4669222,8.9460422],[-11.4669167,8.9455593],[-11.4674825,8.9447562],[-11.4677846,8.9441051],[-11.4681032,8.9432206],[-11.4684382,8.9424122],[-11.4689106,8.9414463],[-11.4691029,8.9405293],[-11.4692677,8.9397045],[-11.4694434,8.9386139],[-11.4695862,8.9377023],[-11.4697395,8.93717],[-11.4701323,8.9363748],[-11.4704911,8.9352873],[-11.4711118,8.9353831],[-11.4714949,8.9356418],[-11.4719459,8.9359772],[-11.4721059,8.9356801],[-11.4721544,8.9350526],[-11.4723484,8.9345688],[-11.4726442,8.9339125],[-11.4731873,8.9335149],[-11.4738565,8.9330167],[-11.4742978,8.9324514],[-11.4745451,8.9318047],[-11.4746373,8.9311627],[-11.4744384,8.9307364],[-11.474099,8.930837],[-11.4735365,8.9311963],[-11.4725472,8.9312969],[-11.4723241,8.9311005],[-11.4722514,8.9306358],[-11.4724163,8.9296968],[-11.4723193,8.9290118],[-11.472169,8.9282836],[-11.4717228,8.9281447],[-11.4713252,8.9279627],[-11.4710439,8.9273447],[-11.4713252,8.9268225],[-11.471718,8.9263483],[-11.4720817,8.9265734],[-11.4724648,8.9263003],[-11.4726297,8.9256824],[-11.4731218,8.9247243],[-11.4733611,8.9246127],[-11.4739261,8.9238049],[-11.4745776,8.9228855],[-11.4750629,8.9225309],[-11.4758938,8.9220777],[-11.4764987,8.9216837],[-11.4770039,8.9218282],[-11.4774028,8.9224521],[-11.4778083,8.9229052],[-11.4783002,8.9233321],[-11.4793638,8.9236013],[-11.4799023,8.9242909],[-11.4804009,8.9252497],[-11.4808396,8.9261231],[-11.4811321,8.9271738],[-11.4814578,8.9286448],[-11.481737,8.929446],[-11.4819099,8.9300305],[-11.482435,8.9303063],[-11.4835784,8.9306281],[-11.4842166,8.9311469],[-11.484775,8.9311994],[-11.4849877,8.9309499],[-11.4849877,8.9300436],[-11.4855195,8.9296365],[-11.4866629,8.9290783],[-11.4870817,8.9284807],[-11.487095,8.9275022],[-11.4872944,8.9257619],[-11.4876002,8.9242186],[-11.4879724,8.9223798],[-11.4885175,8.9208103],[-11.4887103,8.9196807],[-11.4888965,8.9187942],[-11.4895147,8.9182951],[-11.490113,8.9176515],[-11.4902393,8.9169094],[-11.4902459,8.9156485],[-11.4899667,8.9149326],[-11.4893751,8.9144992],[-11.4894083,8.9140198],[-11.4900066,8.9133762],[-11.4901529,8.9129033],[-11.4900531,8.9119839],[-11.4901927,8.9114191],[-11.4907777,8.9109397],[-11.4913494,8.9104997],[-11.4910303,8.9099218],[-11.4907578,8.909114],[-11.4906381,8.9084835],[-11.4905584,8.90761],[-11.4908774,8.9068088],[-11.4907844,8.9060273],[-11.4910835,8.9048977],[-11.4914824,8.9040374],[-11.4917882,8.9035448],[-11.4924396,8.9034397],[-11.4930578,8.9038009],[-11.4935498,8.9040965],[-11.4934501,8.9046284],[-11.4936504,8.9051129],[-11.4941017,8.9054101],[-11.4947033,8.9054287],[-11.495237,8.9060387],[-11.4958752,8.9067348],[-11.4964601,8.9066823],[-11.497085,8.9057234],[-11.4975503,8.9052506],[-11.4980556,8.9054607],[-11.4981752,8.9063408],[-11.4987203,8.9078119],[-11.4994781,8.9092173],[-11.4998238,8.9098083],[-11.5008741,8.9110693],[-11.5015123,8.9120018],[-11.5019244,8.9120675],[-11.5028817,8.911437],[-11.5039187,8.9112794],[-11.5050488,8.9105833],[-11.5060991,8.9106621],[-11.5071362,8.9098609],[-11.5082264,8.9091122],[-11.5087582,8.9099791],[-11.5091703,8.9105964],[-11.5100079,8.9111875],[-11.5103137,8.9116997],[-11.5106062,8.9123827],[-11.5115103,8.9128162],[-11.511816,8.913381],[-11.5114039,8.9138538],[-11.5101807,8.914655],[-11.5096223,8.9159028],[-11.5092102,8.9172425],[-11.5089842,8.9191733],[-11.5089443,8.920513],[-11.5094229,8.9212748],[-11.5097287,8.9205918],[-11.5100345,8.9197118],[-11.5096356,8.9190419],[-11.509742,8.9183984],[-11.5107258,8.9177416],[-11.5119357,8.9168354],[-11.5136907,8.9159816],[-11.5152595,8.9148258],[-11.5168416,8.9137487],[-11.5181047,8.912895],[-11.5194475,8.912212],[-11.5199793,8.9121595],[-11.5201521,8.9131051],[-11.5197665,8.9140377],[-11.5194342,8.9152592],[-11.5193677,8.9162443],[-11.5199527,8.9169536],[-11.5205908,8.9174789],[-11.5207504,8.9165333],[-11.5206307,8.9157452],[-11.5217076,8.9149965],[-11.5225585,8.913775],[-11.5231582,8.9127109],[-11.5233462,8.9110763],[-11.5235718,8.9106119],[-11.5240607,8.9106305],[-11.5243427,8.9112435],[-11.5248128,8.9119493],[-11.5256024,8.9121165],[-11.5268434,8.9113178],[-11.5282536,8.9104633],[-11.528968,8.909516],[-11.5296073,8.9079185],[-11.5299269,8.9057452],[-11.5301714,8.9036275],[-11.530679,8.9019743],[-11.5315439,8.9008412],[-11.5328037,8.9002096],[-11.5338942,8.9003211],[-11.5342138,8.8992901],[-11.5349377,8.8980177],[-11.535859,8.8962065],[-11.5358778,8.8950827],[-11.535248,8.8938659],[-11.5353326,8.8931507],[-11.535906,8.8930857],[-11.5364513,8.8934108],[-11.5373256,8.8939031],[-11.5384819,8.8941446],[-11.5399485,8.8942189],[-11.5406442,8.8938938],[-11.5407852,8.8933922],[-11.5400425,8.8931322],[-11.5391682,8.892417],[-11.5382375,8.8917482],[-11.5379649,8.8911817],[-11.5379273,8.8901135],[-11.5382375,8.8896863],[-11.5387546,8.8897884],[-11.5395349,8.8901228],[-11.540569,8.8901971],[-11.5411989,8.8898256],[-11.5413117,8.8890825],[-11.5409732,8.8882652],[-11.5407006,8.887132],[-11.5408416,8.8865933],[-11.5418381,8.8858038],[-11.54275,8.8857388],[-11.5435491,8.8855809],[-11.5438218,8.8851815],[-11.5435773,8.884104],[-11.5437936,8.8833145],[-11.544461,8.8822649],[-11.5447283,8.8816864],[-11.5449875,8.8807138],[-11.5444201,8.8794362],[-11.5435981,8.8791316],[-11.5437865,8.878421],[-11.544403,8.8770674],[-11.5456359,8.8770167],[-11.547845,8.8767967],[-11.5487355,8.875054],[-11.548941,8.8733282],[-11.5497801,8.8719747],[-11.5504822,8.8705872],[-11.5515782,8.8675417],[-11.5524173,8.8660189],[-11.5525885,8.8646822],[-11.5521262,8.8637008],[-11.5508247,8.8629225],[-11.5503794,8.862398],[-11.5508418,8.8613659],[-11.5513555,8.8603337],[-11.5520919,8.8596908],[-11.5524858,8.860283],[-11.5535817,8.8607567],[-11.554301,8.8610444],[-11.554712,8.8608413],[-11.5553113,8.8602322],[-11.5560477,8.8599446],[-11.5580341,8.8605875],[-11.5594726,8.8605706],[-11.559935,8.8599953],[-11.5597808,8.8588109],[-11.5588219,8.8581504],[-11.5428599,8.853035],[-11.4862758,8.846316],[-11.479631,8.8618042],[-11.4624226,8.8666862],[-11.438888,8.8529553],[-11.4222899,8.8186063],[-11.4114425,8.7938589],[-11.4010923,8.775392],[-11.3964761,8.7657799],[-11.3942343,8.7587117],[-11.3947672,8.7571121],[-11.3949116,8.7566785],[-11.3959239,8.7536396],[-11.395972,8.7534957],[-11.3958209,8.7531421],[-11.3934237,8.7475306],[-11.3819291,8.7278002],[-11.3814427,8.7142602],[-11.3780417,8.7015919],[-11.3754352,8.686064],[-11.3721912,8.6839934],[-11.3662961,8.6708523],[-11.3582031,8.6610311],[-11.357487,8.6619235],[-11.3544244,8.6607309],[-11.3488848,8.6602907],[-11.3443275,8.6344523],[-11.3424634,8.62488],[-11.3409164,8.615039],[-11.344455,8.6002747],[-11.3448976,8.5984282],[-11.3397271,8.5837596],[-11.3387494,8.5809858],[-11.3398191,8.5675659],[-11.3414445,8.550534],[-11.3504349,8.5511302],[-11.3612882,8.5494129],[-11.3609935,8.5374676],[-11.3608541,8.531811],[-11.3752365,8.539251],[-11.3857945,8.530172],[-11.3908381,8.5258346],[-11.4362862,8.542605],[-11.450531,8.5419342],[-11.4586709,8.5358969],[-11.4878392,8.5365678],[-11.4980141,8.5291887],[-11.5217556,8.5412634],[-11.557707,8.5419342],[-11.5855185,8.5057091],[-11.6024767,8.4963168],[-11.6445331,8.4983295],[-11.6791278,8.4909497],[-11.7218625,8.4963168],[-11.7408557,8.4768607],[-11.749674,8.4607583],[-11.7489957,8.4459972],[-11.7578139,8.4392874],[-11.7700238,8.4251965],[-11.7713804,8.4117761],[-11.7856253,8.3976842],[-11.8195417,8.3896315],[-11.8382081,8.3666725],[-11.8446399,8.358761],[-11.8548148,8.3473518],[-11.8731297,8.3413115],[-11.9002628,8.3399691],[-11.927396,8.3547343],[-11.9477458,8.3540631],[-11.9660607,8.3661433],[-11.9803056,8.3674855],[-11.9941715,8.373717],[-11.9954319,8.3743652],[-11.9963961,8.3753704],[-11.9965049,8.3759115],[-11.9964047,8.3770762],[-11.9954316,8.3804794],[-11.9952776,8.3817146],[-11.9955512,8.3886713],[-11.9956368,8.3894272],[-11.99614,8.3899649],[-11.9968057,8.3904508],[-11.9975298,8.3906418],[-11.9981356,8.3902766],[-11.9994881,8.3889546],[-12.0008532,8.3871577],[-12.0028362,8.3832252],[-12.0045555,8.3794141],[-12.0061007,8.3765986],[-12.0073865,8.3747589],[-12.0080404,8.3741638],[-12.0090447,8.3734271],[-12.0109331,8.3726362],[-12.0130531,8.372163],[-12.0160675,8.3721667],[-12.0200078,8.3722909],[-12.0227874,8.3716749],[-12.0238471,8.3709225],[-12.0243324,8.3699765],[-12.0251085,8.3668302],[-12.0259155,8.3626733],[-12.0268966,8.3595104],[-12.0274438,8.358502],[-12.0282162,8.3580137],[-12.029535,8.3578133],[-12.0311246,8.3579065],[-12.0328846,8.3582269],[-12.034082,8.3586881],[-12.0349314,8.3596846],[-12.0354348,8.3610485],[-12.0355445,8.3621156],[-12.0352471,8.3637587],[-12.0343837,8.3673066],[-12.0343105,8.3686993],[-12.0346516,8.369469],[-12.0350783,8.3697845],[-12.0357208,8.3697723],[-12.0367678,8.3693226],[-12.0385594,8.3682374],[-12.0414662,8.3661936],[-12.0429791,8.3645949],[-12.043404,8.3636614],[-12.043404,8.3608941],[-12.0438267,8.358364],[-12.0439447,8.3566126],[-12.0436204,8.353875],[-12.0437516,8.3520693],[-12.0444382,8.3504452],[-12.0463839,8.3478711],[-12.0497926,8.3437852],[-12.0511553,8.3418116],[-12.052374,8.3387931],[-12.0528738,8.33738],[-12.0547751,8.3345402],[-12.055943,8.3328832],[-12.0563873,8.3323951],[-12.0579743,8.3306512],[-12.0632177,8.325672],[-12.0645847,8.3240953],[-12.0659629,8.3224188],[-12.0670282,8.3205946],[-12.0675577,8.3192023],[-12.0677735,8.3179936],[-12.0676617,8.3166525],[-12.0672352,8.3157053],[-12.0666662,8.3151735],[-12.0653325,8.3144761],[-12.0639666,8.3134281],[-12.0628222,8.3123771],[-12.061193,8.3103611],[-12.0598634,8.3081231],[-12.0579044,8.3044448],[-12.0564683,8.3017356],[-12.0554504,8.2991393],[-12.0543529,8.2964902],[-12.0534841,8.2948601],[-12.0525484,8.2936777],[-12.05153,8.2925993],[-12.0501965,8.2917946],[-12.0490088,8.2914822],[-12.04744,8.2910939],[-12.0464553,8.2911555],[-12.0452751,8.291336],[-12.0443799,8.2918071],[-12.0439174,8.2922933],[-12.043008,8.2935776],[-12.042243,8.2945598],[-12.0406565,8.2960745],[-12.0387948,8.2977272],[-12.0381457,8.2980722],[-12.0374108,8.2982049],[-12.0366176,8.2980796],[-12.035789,8.2976053],[-12.0347505,8.2967645],[-12.0339752,8.2953693],[-12.0336343,8.2940326],[-12.0336288,8.2933743],[-12.033826,8.2918877],[-12.03411,8.2907573],[-12.034294,8.2902371],[-12.0345414,8.2899554],[-12.034911,8.2898018],[-12.0364512,8.2896528],[-12.0375932,8.2892975],[-12.0382519,8.2888706],[-12.0390093,8.2876307],[-12.0394976,8.2863249],[-12.0396212,8.2857349],[-12.0381998,8.2806584],[-12.0358913,8.2759975],[-12.0333976,8.2711729],[-12.0329482,8.2697535],[-12.0328259,8.267839],[-12.0357586,8.2552482],[-12.0357769,8.2535507],[-12.0355977,8.2528379],[-12.0347604,8.2511978],[-12.0323273,8.246715],[-12.0298363,8.2412857],[-12.0295037,8.2392975],[-12.0297129,8.2384984],[-12.0302487,8.2378053],[-12.0310894,8.2371735],[-12.0316654,8.2368367],[-12.0322785,8.2368504],[-12.033189,8.2372156],[-12.033757,8.2377435],[-12.0340526,8.2382648],[-12.0342158,8.2390875],[-12.0340171,8.2404042],[-12.0340308,8.2417965],[-12.0345702,8.2448447],[-12.0351393,8.2460311],[-12.0362747,8.2477613],[-12.0373142,8.2494402],[-12.0378345,8.2500932],[-12.0387145,8.2504447],[-12.0409792,8.2508473],[-12.043419,8.2507462],[-12.0465992,8.2499397],[-12.0490945,8.2490686],[-12.0539934,8.2479719],[-12.0546091,8.2479299],[-12.0551977,8.2480339],[-12.0563699,8.2485533],[-12.0584447,8.2500455],[-12.0555208,8.2542133],[-12.0895165,8.2788893],[-12.1010481,8.2762042],[-12.1268246,8.2943279],[-12.1431045,8.2976841],[-12.1702376,8.3325864],[-12.2387488,8.3399691],[-12.2672386,8.3607744],[-12.2787702,8.3621166],[-12.2950501,8.3547343],[-12.3106517,8.3372845],[-12.3276099,8.3379557],[-12.3655963,8.3554054],[-12.3832328,8.353392],[-12.3951672,8.3191698],[-12.415997,8.3113955],[-12.4306809,8.3155313],[-12.4423262,8.3080359],[-12.451944,8.3030189],[-12.4565952,8.2995013],[-12.4601583,8.2932219],[-12.4647225,8.2936176],[-12.4795555,8.3037251],[-12.4938004,8.2956704],[-12.5107586,8.2970129],[-12.5195769,8.288958],[-12.5240489,8.287975],[-12.533814,8.2898975],[-12.5417547,8.2938515],[-12.5469709,8.2944914],[-12.5510064,8.2965185],[-12.5534378,8.2982634],[-12.5629899,8.3037251],[-12.5721298,8.3052321],[-12.5822338,8.3068864],[-12.5932874,8.3108825],[-12.5950065,8.3170065],[-12.5984471,8.322183],[-12.5990614,8.328413],[-12.6030454,8.3326678],[-12.6041521,8.3410207],[-12.6144216,8.3410179],[-12.6194167,8.3500871],[-12.6326182,8.3547351],[-12.6410403,8.3540286],[-12.6479456,8.3579738],[-12.6477976,8.3641151],[-12.6461045,8.3670943]]]]}]}
