# Supplementary material
Source: ML conference proceedings conference paper supplement (https://proceedings.neurips.cc/paper_files/paper/2022/hash/9d3faa41886997cfc2128b930077fa49-Abstract.html)
Supplement: Supplementary file 1 [file 9d3faa41886997cfc2128b930077fa49-Supplemental-Conference.zip › code/ebola/map/geojson/tougue.geojson]

{"type":"GeometryCollection","geometries":[{"type":"MultiPolygon","coordinates":[[[[-11.9991195,11.3287703],[-11.9975744,11.3548258],[-12.0012825,11.3678527],[-11.9960294,11.3742144],[-11.9941754,11.3839083],[-11.9963384,11.3936018],[-11.9923213,11.4060211],[-11.97718,11.4181369],[-11.9818151,11.4302523],[-11.9777981,11.433281],[-11.9660558,11.4251033],[-11.9561676,11.4372184],[-11.9472065,11.4411557],[-11.9444254,11.4326753],[-11.9370093,11.4311609],[-11.9329922,11.4375212],[-11.9413354,11.4466072],[-11.9376273,11.4575099],[-11.9261941,11.4638697],[-11.9193959,11.4741661],[-11.9172329,11.4868847],[-11.9156879,11.4971803],[-11.9082717,11.5044475],[-11.8897314,11.5105034],[-11.873354,11.5050531],[-11.8557407,11.5065671],[-11.8439985,11.5198898],[-11.8390544,11.5313952],[-11.8263851,11.5410836],[-11.818351,11.5547074],[-11.8078448,11.5595513],[-11.8029007,11.5583403],[-11.7973386,11.5625787],[-11.7846693,11.559854],[-11.764275,11.5665142],[-11.7460436,11.5837693],[-11.7336834,11.5946667],[-11.7259582,11.6125255],[-11.7182331,11.6306858],[-11.7080359,11.6412787],[-11.6817704,11.6440025],[-11.6678651,11.651266],[-11.6666291,11.6606476],[-11.6746632,11.6818308],[-11.6691011,11.6999865],[-11.6524148,11.7184436],[-11.6026648,11.7308485],[-11.5930857,11.7381097],[-11.5529149,11.772295],[-11.5485888,11.7816726],[-11.5374646,11.7934697],[-11.5263404,11.8200869],[-11.5139801,11.8324872],[-11.4932767,11.8391408],[-11.4756634,11.8557741],[-11.4580501,11.8875257],[-11.4484709,11.9008301],[-11.4376557,11.9065749],[-11.4095361,11.9047608],[-11.3851247,11.9189713],[-11.3730734,11.9247158],[-11.3604042,11.9346928],[-11.3369197,11.9824561],[-11.3319756,11.9894083],[-11.3165253,12.0018009],[-11.3096374,12.0055684],[-11.3042558,12.0133207],[-11.2921671,12.020057],[-11.2904571,12.01906],[-11.2873931,12.01792],[-11.2789151,12.010938],[-11.2757801,12.008729],[-11.2729301,12.007589],[-11.2700091,12.007946],[-11.2665891,12.008302],[-11.2635261,12.008444],[-11.2604621,12.009086],[-11.2589661,12.008943],[-11.2552611,12.008159],[-11.2519841,12.007874],[-11.2497761,12.007376],[-11.2439331,12.003243],[-11.2393021,12.000394],[-11.2373431,11.99904],[-11.2353481,11.998755],[-11.2299331,11.99904],[-11.2280811,11.998612],[-11.2250891,11.998042],[-11.2223811,11.998327],[-11.2208141,11.999182],[-11.2206001,12.000322],[-11.2215971,12.002032],[-11.2216691,12.003386],[-11.2220961,12.004526],[-11.2243761,12.007162],[-11.2250891,12.008302],[-11.2250891,12.009584],[-11.2246611,12.010012],[-11.2240911,12.009941],[-11.2225241,12.009157],[-11.2213131,12.008658],[-11.2204581,12.008658],[-11.2193891,12.008943],[-11.2157551,12.012862],[-11.2146151,12.013859],[-11.2144731,12.01621],[-11.2139741,12.01735],[-11.2131901,12.018561],[-11.2124071,12.019488],[-11.2116941,12.019844],[-11.2104121,12.019559],[-11.2087731,12.019701],[-11.2071351,12.0202],[-11.2057101,12.020342],[-11.2046411,12.021269],[-11.2032871,12.02077],[-11.2013641,12.019488],[-11.1995111,12.017778],[-11.1985141,12.01678],[-11.1981581,12.016495],[-11.1974451,12.016638],[-11.1965901,12.017991],[-11.1955931,12.018918],[-11.1945241,12.019416],[-11.1933841,12.019488],[-11.1919591,12.018205],[-11.1908191,12.016566],[-11.1899641,12.015569],[-11.1893941,12.014999],[-11.1886111,12.014785],[-11.1873281,12.015498],[-11.1863311,12.016851],[-11.1853331,12.017991],[-11.1838371,12.018704],[-11.1817001,12.018989],[-11.1804171,12.018918],[-11.1797761,12.019559],[-11.1792061,12.020699],[-11.1782091,12.02191],[-11.1771401,12.023335],[-11.1757151,12.023834],[-11.1751451,12.024617],[-11.1747891,12.025615],[-11.1740761,12.026826],[-11.1735061,12.027467],[-11.1732931,12.02818],[-11.1736491,12.028678],[-11.1741481,12.029035],[-11.1742191,12.029605],[-11.1734351,12.031457],[-11.1720101,12.033167],[-11.1705141,12.033309],[-11.1645681,12.0259612],[-11.1537692,12.0102353],[-11.1520894,11.9874663],[-11.1537692,11.9585915],[-11.1612085,11.9376965],[-11.1470499,11.9245482],[-11.1292918,11.9144518],[-11.1204127,11.917739],[-11.1028946,11.9182086],[-11.0824967,11.8923792],[-11.0766841,11.8912602],[-11.0752177,11.8909779],[-11.0737276,11.8906911],[-11.0732691,11.8906028],[-11.0726334,11.8904804],[-11.0532198,11.8867434],[-11.05082,11.8792287],[-11.0726577,11.867017],[-11.0767373,11.8522213],[-11.0714578,11.8090039],[-11.0764973,11.7857482],[-11.0709779,11.7498037],[-11.079137,11.7279528],[-11.0870562,11.70845],[-11.0997749,11.6915308],[-11.1204127,11.6917658],[-11.1352912,11.6880059],[-11.1451301,11.6811908],[-11.1648081,11.6541639],[-11.1633682,11.6457028],[-11.1494497,11.6386517],[-11.1441702,11.6283097],[-11.1571289,11.6177322],[-11.1684077,11.6012777],[-11.1893499,11.5890449],[-11.2073368,11.5814814],[-11.2078989,11.5761394],[-11.2082784,11.5750648],[-11.2082716,11.5740835],[-11.2084383,11.5734505],[-11.2082474,11.5727846],[-11.207634,11.5724551],[-11.207634,11.5722377],[-11.2080111,11.5718097],[-11.2091386,11.5714931],[-11.2090796,11.5710766],[-11.207855,11.5708617],[-11.2073674,11.5704539],[-11.2073978,11.570111],[-11.2080055,11.5697644],[-11.2071261,11.5688293],[-11.2068357,11.5682661],[-11.207017,11.5677034],[-11.2074574,11.5672511],[-11.2074006,11.5668534],[-11.2071952,11.5662999],[-11.2074653,11.5656984],[-11.2081142,11.5651168],[-11.2081683,11.5647986],[-11.2074359,11.5636265],[-11.2072835,11.5630506],[-11.2062083,11.5626211],[-11.2058664,11.5618675],[-11.2061248,11.561203],[-11.20625,11.5604892],[-11.2061496,11.5603405],[-11.2058606,11.5603138],[-11.2055257,11.55971],[-11.2041059,11.5594304],[-11.2030069,11.55994],[-11.2027012,11.5605465],[-11.2027084,11.5614973],[-11.2029969,11.5620773],[-11.2046119,11.5630108],[-11.2047392,11.56334],[-11.2046792,11.5634194],[-11.2034637,11.5636054],[-11.2022674,11.5631997],[-11.2014101,11.5628052],[-11.1999381,11.5607971],[-11.1982708,11.5591772],[-11.1976943,11.5590277],[-11.197193,11.5596045],[-11.1968513,11.5608899],[-11.196207,11.561905],[-11.1953776,11.5619468],[-11.1947763,11.5617642],[-11.1941552,11.5605408],[-11.1940724,11.5595671],[-11.194282,11.559178],[-11.1954283,11.5589674],[-11.1961255,11.5586569],[-11.1972452,11.5578891],[-11.1980589,11.5564887],[-11.1980338,11.5559642],[-11.1975467,11.5556083],[-11.1962886,11.5556352],[-11.195057,11.5551199],[-11.1947229,11.5544845],[-11.1938738,11.5536862],[-11.1933111,11.5529489],[-11.1929273,11.5517107],[-11.1926673,11.550035],[-11.1917457,11.5484512],[-11.1902246,11.5480651],[-11.1891853,11.5473053],[-11.1891008,11.5461647],[-11.1889314,11.5454743],[-11.1888908,11.5448445],[-11.1886271,11.5436521],[-11.1886206,11.5426376],[-11.1893671,11.5404698],[-11.189332,11.5394309],[-11.1891791,11.538749],[-11.1886413,11.5385244],[-11.1882109,11.5387677],[-11.187283,11.5398485],[-11.1866911,11.5396673],[-11.184784,11.5398371],[-11.1838143,11.5401604],[-11.1830588,11.5401478],[-11.18203,11.5399024],[-11.1813608,11.5398709],[-11.1810503,11.5395861],[-11.1797441,11.5393247],[-11.1790634,11.5388738],[-11.1778099,11.5376928],[-11.1760677,11.5373334],[-11.1752109,11.5375415],[-11.1748509,11.5382789],[-11.1736554,11.5381674],[-11.1731506,11.5381674],[-11.1719015,11.5377148],[-11.1710077,11.5367455],[-11.1703401,11.5365838],[-11.1693495,11.5367151],[-11.1689933,11.5372993],[-11.1688309,11.5380554],[-11.1682,11.5390419],[-11.1677608,11.5391549],[-11.1674239,11.5389672],[-11.165124,11.5392387],[-11.1643662,11.5393832],[-11.1636697,11.5393769],[-11.1625702,11.5391075],[-11.1616587,11.5392959],[-11.1600194,11.5400032],[-11.1595073,11.5400374],[-11.1593557,11.5398842],[-11.1589558,11.538589],[-11.1584122,11.5380302],[-11.1581607,11.5366447],[-11.1578157,11.5363228],[-11.1557719,11.5359507],[-11.1535499,11.5354625],[-11.1525606,11.5350196],[-11.1520645,11.5345275],[-11.1520249,11.5336082],[-11.1518501,11.5332404],[-11.1519662,11.5327643],[-11.1511712,11.5320595],[-11.150443,11.5318793],[-11.1492619,11.5320314],[-11.1483168,11.5317137],[-11.1465805,11.5323618],[-11.1454068,11.5324566],[-11.1446763,11.5320381],[-11.1442241,11.5311717],[-11.1434257,11.5306431],[-11.1418126,11.5301827],[-11.1398548,11.5306264],[-11.1394545,11.5302523],[-11.1381867,11.5295288],[-11.1357217,11.5290835],[-11.1345935,11.5291244],[-11.1337937,11.5293334],[-11.1320949,11.529037],[-11.1316737,11.5282878],[-11.1300425,11.5268483],[-11.1292089,11.5269995],[-11.1279706,11.5280697],[-11.1272216,11.5288172],[-11.1265973,11.5299523],[-11.1262093,11.5310452],[-11.125971,11.532973],[-11.1256888,11.534204],[-11.1251967,11.535755],[-11.1248405,11.5361641],[-11.1245992,11.5362697],[-11.1243878,11.5361915],[-11.1238669,11.5353598],[-11.1233977,11.5343221],[-11.123174,11.533714],[-11.1225752,11.5333304],[-11.1212246,11.5333168],[-11.1195912,11.5330411],[-11.1184612,11.5333565],[-11.1173553,11.5343242],[-11.1164323,11.5353077],[-11.1158957,11.5356622],[-11.1154429,11.5355164],[-11.1148019,11.5355098],[-11.1142684,11.5352484],[-11.1137258,11.5346618],[-11.1137154,11.5345261],[-11.1151677,11.5337825],[-11.1157249,11.5331106],[-11.1160208,11.5324672],[-11.1161103,11.53006],[-11.1160244,11.5292885],[-11.1155625,11.5285989],[-11.1144765,11.5279759],[-11.1137803,11.5279438],[-11.1131818,11.5291376],[-11.1123188,11.5299896],[-11.1104254,11.5311915],[-11.1088798,11.5315124],[-11.1078954,11.5312605],[-11.1075721,11.530771],[-11.1075783,11.530071],[-11.1080583,11.5289213],[-11.1097579,11.5241251],[-11.1099533,11.5231612],[-11.1098214,11.5216577],[-11.1093976,11.52048],[-11.108805,11.5195149],[-11.110077,11.5186487],[-11.1150958,11.5127115],[-11.1149242,11.5073292],[-11.1193668,11.5021387],[-11.1207681,11.4990489],[-11.119741,11.4958617],[-11.1207051,11.4942871],[-11.1227458,11.4941205],[-11.1253842,11.4915349],[-11.1264259,11.48609],[-11.1252234,11.4786824],[-11.1262487,11.4684667],[-11.1318379,11.4595031],[-11.1362204,11.4613203],[-11.1402468,11.4613203],[-11.1438999,11.4580811],[-11.1466383,11.4543908],[-11.1553261,11.4493821],[-11.1625729,11.4507349],[-11.1682753,11.442436],[-11.1707754,11.4404757],[-11.1762478,11.4424871],[-11.179929,11.4409408],[-11.1827196,11.4378637],[-11.1835908,11.4334238],[-11.1812014,11.4250598],[-11.184187,11.4224585],[-11.1908454,11.4229605],[-11.1977148,11.4214455],[-11.2028695,11.4216139],[-11.2120352,11.4189017],[-11.2139225,11.4160426],[-11.2169145,11.415228],[-11.2210167,11.4172385],[-11.2243581,11.4172385],[-11.2297062,11.4128417],[-11.2341945,11.4104727],[-11.2364345,11.4060812],[-11.2400343,11.4027204],[-11.2412335,11.4008731],[-11.2453589,11.3975032],[-11.24672,11.3948347],[-11.2533857,11.3926565],[-11.2552734,11.3911425],[-11.2606112,11.3894545],[-11.2627087,11.3867128],[-11.2676733,11.3729512],[-11.2699276,11.3721012],[-11.2704504,11.3635566],[-11.2656439,11.3569929],[-11.2658085,11.3542494],[-11.2688131,11.3526128],[-11.2784242,11.3512667],[-11.2827487,11.3490619],[-11.2878984,11.3448544],[-11.2925356,11.3424969],[-11.294315,11.3409267],[-11.2932836,11.3309835],[-11.2952914,11.3285227],[-11.2990647,11.3266728],[-11.3018429,11.3236083],[-11.3042359,11.3180773],[-11.309163,11.3155783],[-11.3136504,11.3140552],[-11.3161033,11.3113064],[-11.3178219,11.2988351],[-11.3196948,11.2954959],[-11.3305169,11.2803347],[-11.3317331,11.2765863],[-11.3308764,11.2683533],[-11.332398,11.2658617],[-11.3331708,11.2652682],[-11.3347078,11.2651288],[-11.3408338,11.2678019],[-11.3451141,11.2693863],[-11.3469216,11.2686248],[-11.3475238,11.2669996],[-11.3475238,11.2640883],[-11.3461338,11.2608505],[-11.3430606,11.2568318],[-11.3430606,11.2544713],[-11.3453118,11.2543136],[-11.3499374,11.2559938],[-11.3523847,11.2561653],[-11.3578708,11.2544839],[-11.3626001,11.2553121],[-11.3667173,11.259855],[-11.3718675,11.2610335],[-11.3763167,11.2659005],[-11.3825456,11.269464],[-11.3860484,11.269464],[-11.3901683,11.2672754],[-11.3939719,11.2672754],[-11.3972453,11.2635582],[-11.4050519,11.2617274],[-11.4100124,11.2642437],[-11.4141115,11.2644112],[-11.4182614,11.2683116],[-11.4223119,11.2664118],[-11.4258412,11.2630968],[-11.4254632,11.2572865],[-11.4295726,11.2550785],[-11.4300929,11.25268],[-11.4300929,11.2454585],[-11.4322749,11.241343],[-11.4376636,11.2410126],[-11.4433648,11.2432155],[-11.4478524,11.2403377],[-11.4543595,11.2403377],[-11.4595729,11.2384627],[-11.4624868,11.2340917],[-11.467978,11.2327452],[-11.469566,11.2304952],[-11.4704339,11.2267496],[-11.4702638,11.2225762],[-11.4719042,11.2208062],[-11.4765377,11.2208062],[-11.4793579,11.2178671],[-11.4795323,11.2130761],[-11.4773146,11.2075539],[-11.4798933,11.2033379],[-11.4774385,11.1985217],[-11.4748835,11.1971851],[-11.4740414,11.1923934],[-11.4752414,11.1881894],[-11.4747293,11.1819933],[-11.4777651,11.1788497],[-11.4822478,11.1763125],[-11.4834796,11.1737229],[-11.4834796,11.167217],[-11.4796878,11.1651879],[-11.4788571,11.1612762],[-11.4820308,11.1583264],[-11.488358,11.157823],[-11.4941723,11.1553064],[-11.4992674,11.1566394],[-11.5097019,11.1610755],[-11.5107574,11.1569333],[-11.514292,11.1546214],[-11.5177182,11.1542853],[-11.5206921,11.1527406],[-11.5227506,11.1493747],[-11.5263523,11.147692],[-11.5301645,11.1420816],[-11.5308458,11.1384048],[-11.5352255,11.1355951],[-11.539273,11.1357605],[-11.5428069,11.1375767],[-11.544187,11.1411311],[-11.5477434,11.1420035],[-11.5560131,11.1367633],[-11.5581456,11.1362402],[-11.5583269,11.1335721],[-11.5561128,11.1305639],[-11.557059,11.1285521],[-11.5612237,11.1300232],[-11.564693,11.1320655],[-11.568247,11.1311938],[-11.5720315,11.1214043],[-11.5764712,11.1188911],[-11.5785877,11.1166411],[-11.5764263,11.1082834],[-11.5785974,11.1076671],[-11.5810608,11.1077964],[-11.5892118,11.1152177],[-11.5912634,11.1150348],[-11.5917865,11.1121255],[-11.5929121,11.1113366],[-11.5965348,11.1111673],[-11.5988301,11.1085685],[-11.5996877,11.1018357],[-11.6013297,11.1002245],[-11.6039475,11.1003851],[-11.6072118,11.1056114],[-11.6086927,11.1056114],[-11.6113137,11.1042398],[-11.6183372,11.0975157],[-11.6226495,11.0966695],[-11.6234165,11.0953522],[-11.6203153,11.092309],[-11.621299,11.0897349],[-11.6246897,11.0877385],[-11.6269692,11.086534],[-11.6276574,11.0840018],[-11.6294692,11.0828703],[-11.6334384,11.0828703],[-11.6361918,11.0798304],[-11.638664,11.0795069],[-11.6407484,11.0810411],[-11.6431593,11.0797672],[-11.6417389,11.0762823],[-11.6398972,11.0729962],[-11.6416685,11.071416],[-11.6482768,11.0731628],[-11.6544359,11.0657964],[-11.6558384,11.0621831],[-11.6544629,11.0591456],[-11.6554576,11.0558914],[-11.663475,11.053715],[-11.6689626,11.0501806],[-11.6729774,11.0494953],[-11.6740157,11.0430407],[-11.6768803,11.0400638],[-11.6849424,11.0378752],[-11.6880393,11.0351733],[-11.691638,11.0336595],[-11.6966527,11.0300952],[-11.6990527,11.0257205],[-11.7032118,11.0233392],[-11.7028144,11.0192753],[-11.7013927,11.0179201],[-11.7007097,11.0170838],[-11.701032,11.0161202],[-11.7017632,11.0154394],[-11.7030895,11.0152444],[-11.7049687,11.0144687],[-11.7066745,11.015322],[-11.7086697,11.0159674],[-11.7117676,11.01715],[-11.7124735,11.0148338],[-11.7359723,10.9891771],[-11.7511536,10.9972611],[-11.7723915,10.998112],[-11.8207186,11.0085357],[-11.8432568,11.0187464],[-11.8576084,11.0291872],[-11.8616774,11.0321473],[-11.8766306,11.0551189],[-11.8902836,11.0861703],[-11.8887666,11.1106263],[-11.8770641,11.1433727],[-11.8688289,11.1486884],[-11.865795,11.1599572],[-11.8742468,11.1793046],[-11.8900669,11.1969499],[-11.9091376,11.2077917],[-11.9546474,11.2173577],[-11.9674335,11.2350008],[-11.9750185,11.2560435],[-11.9904051,11.2617821],[-11.9949561,11.2789974],[-11.9990308,11.287502],[-11.9986578,11.2904119],[-11.9984341,11.2921721],[-11.9984051,11.2923983],[-11.9969065,11.3040746],[-11.997733,11.3132992],[-11.9991195,11.3287703]]]]}]}
