# Supplementary material
Source: ML conference proceedings conference paper supplement (https://proceedings.neurips.cc/paper_files/paper/2022/hash/9d3faa41886997cfc2128b930077fa49-Abstract.html)
Supplement: Supplementary file 1 [file 9d3faa41886997cfc2128b930077fa49-Supplemental-Conference.zip › code/ebola/map/geojson/western.geojson]

{"type":"GeometryCollection","geometries":[{"type":"MultiPolygon","coordinates":[[[[-13.297809,8.4960959],[-13.2979008,8.4954773],[-13.2978794,8.4953681],[-13.2977557,8.4949371],[-13.2977192,8.4947139],[-13.2977165,8.4946563],[-13.2977322,8.4946293],[-13.2977688,8.4946086],[-13.2978276,8.4946435],[-13.2979736,8.4948023],[-13.298119,8.4948914],[-13.2982476,8.4948394],[-13.2984542,8.4946018],[-13.2985056,8.4944963],[-13.2984721,8.4943297],[-13.2981707,8.4939159],[-13.2978178,8.4936914],[-13.29741,8.4933865],[-13.2973369,8.4933564],[-13.2972793,8.4933325],[-13.297218,8.4933005],[-13.297117,8.493225],[-13.2969909,8.4931614],[-13.2969198,8.4930711],[-13.2969002,8.4929231],[-13.2967924,8.492847],[-13.296708,8.4927913],[-13.2966476,8.4927329],[-13.2965042,8.492614],[-13.2962265,8.492522],[-13.2960297,8.4924323],[-13.2959181,8.4924106],[-13.2957474,8.4924348],[-13.2956438,8.4924743],[-13.2955184,8.4925154],[-13.2954958,8.4925121],[-13.2954768,8.4925114],[-13.295391,8.4924995],[-13.2953004,8.4924823],[-13.2952298,8.4924394],[-13.2951637,8.4924139],[-13.2950917,8.4924133],[-13.2950079,8.4925006],[-13.2949788,8.4926227],[-13.2950235,8.4926985],[-13.2950624,8.4927157],[-13.2951,8.4927317],[-13.2951099,8.4927593],[-13.2950596,8.4928439],[-13.2950222,8.4929385],[-13.2950014,8.4929856],[-13.2949436,8.4930383],[-13.2944629,8.4931256],[-13.2940418,8.4930221],[-13.2933472,8.4926295],[-13.2926926,8.4920936],[-13.2915929,8.4908919],[-13.2908098,8.4896637],[-13.2903619,8.4888811],[-13.2898495,8.487995],[-13.2891683,8.4866872],[-13.2883823,8.485305],[-13.288208,8.4849523],[-13.2879692,8.4844402],[-13.2873551,8.4831695],[-13.2868882,8.4821014],[-13.2865236,8.4812277],[-13.2862043,8.480461],[-13.2861663,8.4803554],[-13.2856867,8.4790867],[-13.2851556,8.4778584],[-13.2847318,8.4767999],[-13.2843965,8.4759457],[-13.2841069,8.475232],[-13.2836697,8.4742453],[-13.283557,8.4739772],[-13.2832513,8.4732291],[-13.2831895,8.4730779],[-13.2825512,8.4715339],[-13.282291,8.4708069],[-13.2820174,8.46973],[-13.2818357,8.468988],[-13.2817733,8.4688014],[-13.2816231,8.468337],[-13.281245,8.4674377],[-13.280915,8.466679],[-13.2808211,8.4664614],[-13.2806791,8.466013],[-13.2804912,8.4654267],[-13.2803598,8.4649067],[-13.2802499,8.4643126],[-13.2801399,8.4638244],[-13.2801154,8.4636767],[-13.2799365,8.4627604],[-13.2797216,8.4618691],[-13.2796062,8.4614367],[-13.2793004,8.4605241],[-13.2791957,8.4602588],[-13.2790482,8.4597759],[-13.2788659,8.4589668],[-13.278772,8.4582544],[-13.2787291,8.4575877],[-13.2787291,8.4573483],[-13.2786969,8.4564728],[-13.2787372,8.4557936],[-13.2787961,8.4554063],[-13.2788708,8.4550352],[-13.2789034,8.4549361],[-13.2789156,8.454887],[-13.2789307,8.4548257],[-13.2789421,8.454563],[-13.2789678,8.4539605],[-13.279075,8.4536588],[-13.2791682,8.4533965],[-13.2792842,8.45326],[-13.2793837,8.4531514],[-13.2796839,8.4530027],[-13.2797712,8.45298],[-13.2798449,8.4530173],[-13.2798972,8.4530544],[-13.2799536,8.4531367],[-13.2800045,8.4532096],[-13.2800836,8.4532348],[-13.28014,8.453248],[-13.2801735,8.4532149],[-13.2802177,8.4531473],[-13.2802713,8.4530901],[-13.280372,8.4530345],[-13.2803814,8.4530252],[-13.2804028,8.4530266],[-13.2805423,8.4531327],[-13.2805946,8.4531221],[-13.2806241,8.4530823],[-13.2806094,8.4530505],[-13.2805624,8.4530053],[-13.2805262,8.4529151],[-13.2805195,8.4528063],[-13.2805221,8.4526842],[-13.2805328,8.4524879],[-13.2805543,8.452212],[-13.2805624,8.4521152],[-13.2805182,8.4520065],[-13.2804148,8.4518684],[-13.2803317,8.4517239],[-13.2802029,8.4514625],[-13.2801292,8.4513114],[-13.2800783,8.4512052],[-13.2800071,8.450969],[-13.2799683,8.450664],[-13.2799227,8.4501042],[-13.279853,8.4495272],[-13.2798261,8.4489726],[-13.2798168,8.4487617],[-13.2797497,8.448247],[-13.2796773,8.4476328],[-13.2796222,8.4466007],[-13.2795715,8.4459906],[-13.2795417,8.4456031],[-13.2795311,8.445054],[-13.2795216,8.4440908],[-13.279566,8.4433016],[-13.2796437,8.4423212],[-13.2797685,8.4416341],[-13.2799682,8.440724],[-13.2802083,8.4400275],[-13.2803652,8.439623],[-13.2804564,8.4393259],[-13.2806817,8.4388907],[-13.2808721,8.4385167],[-13.2811832,8.4380762],[-13.2814032,8.4378003],[-13.2815346,8.4376755],[-13.2818832,8.4372922],[-13.2819713,8.4372597],[-13.2820595,8.4372272],[-13.2821047,8.4372299],[-13.2821884,8.4372429],[-13.2822354,8.4372451],[-13.2822897,8.4372803],[-13.2823957,8.4373851],[-13.2825191,8.4374672],[-13.2826586,8.4375045],[-13.2827833,8.4375176],[-13.2828839,8.4374726],[-13.282987,8.4373571],[-13.2830506,8.4371767],[-13.2831147,8.4369944],[-13.2832004,8.4368412],[-13.2833049,8.4366898],[-13.2834926,8.4364803],[-13.2836008,8.4363531],[-13.2838092,8.4361076],[-13.2840478,8.4358859],[-13.2841619,8.4357956],[-13.2841996,8.4357666],[-13.2843576,8.4356406],[-13.284441,8.4355898],[-13.2844824,8.4355849],[-13.2845629,8.4356114],[-13.2850336,8.4357984],[-13.2853876,8.4359642],[-13.2854937,8.4360041],[-13.2857203,8.4360731],[-13.285833,8.4361235],[-13.2859496,8.4361341],[-13.2860207,8.4361248],[-13.2860877,8.4361009],[-13.286128,8.4360014],[-13.2861803,8.4359205],[-13.2862272,8.4358635],[-13.2862661,8.4358356],[-13.286305,8.435817],[-13.2863988,8.4357918],[-13.2864284,8.4357852],[-13.2864632,8.4357759],[-13.28649,8.4357546],[-13.2865102,8.4357149],[-13.2866308,8.4355225],[-13.2867824,8.4353526],[-13.2869151,8.4352599],[-13.2872222,8.4350211],[-13.2874623,8.4348579],[-13.2877139,8.4347748],[-13.2877548,8.4348062],[-13.2877882,8.4348923],[-13.287878,8.4350277],[-13.2880377,8.4351312],[-13.2882898,8.4352532],[-13.288605,8.4353541],[-13.28879,8.4353488],[-13.288892,8.4353249],[-13.2890972,8.4352678],[-13.2894177,8.4353328],[-13.2896121,8.4353725],[-13.2897034,8.4354045],[-13.2897918,8.4354536],[-13.2898536,8.4354841],[-13.2900895,8.4356578],[-13.2901728,8.4357998],[-13.2902142,8.4359403],[-13.2904623,8.4362627],[-13.2906702,8.4363688],[-13.2908338,8.4363887],[-13.2909359,8.4364087],[-13.2910779,8.4364457],[-13.2913421,8.4365931],[-13.2915902,8.4367562],[-13.2920127,8.4369672],[-13.2923623,8.4370393],[-13.29245,8.4370548],[-13.2926096,8.4370534],[-13.2927476,8.4370241],[-13.2927745,8.4370163],[-13.2928147,8.4369911],[-13.2928334,8.4369154],[-13.2928764,8.436873],[-13.2929515,8.4368398],[-13.2930374,8.4367921],[-13.2930696,8.4367483],[-13.2930776,8.4367019],[-13.2930548,8.4365719],[-13.2930292,8.4364749],[-13.2930038,8.4363928],[-13.2929623,8.4362707],[-13.2929073,8.4362283],[-13.292863,8.4361858],[-13.2928334,8.4361592],[-13.2928146,8.4361341],[-13.2928054,8.4360996],[-13.2927818,8.4360578],[-13.2927289,8.4360174],[-13.2926243,8.4359656],[-13.2925653,8.4359298],[-13.292529,8.4358859],[-13.2925358,8.435829],[-13.2925707,8.4357998],[-13.2926511,8.4358303],[-13.2927088,8.435833],[-13.2927276,8.4358237],[-13.2927315,8.4357958],[-13.2926953,8.4357453],[-13.29258,8.4356896],[-13.2925143,8.435634],[-13.2925036,8.4355557],[-13.2925103,8.4354376],[-13.292517,8.4353501],[-13.2924874,8.4352478],[-13.2924043,8.4351576],[-13.2922433,8.4350131],[-13.2920341,8.4348127],[-13.2918304,8.4346258],[-13.2913823,8.4343205],[-13.2912549,8.4342343],[-13.2910216,8.4340778],[-13.2903899,8.4337461],[-13.2902907,8.4336189],[-13.290223,8.4334019],[-13.2901868,8.4332846],[-13.2901272,8.4330378],[-13.2900748,8.4328294],[-13.2899488,8.432405],[-13.2898804,8.432072],[-13.2898509,8.4319314],[-13.2897771,8.4316237],[-13.2897463,8.4314724],[-13.28971,8.4313318],[-13.289655,8.4311527],[-13.2896108,8.4310055],[-13.2895785,8.4308821],[-13.2895477,8.4307508],[-13.2895263,8.4306765],[-13.289482,8.4304946],[-13.2894511,8.4303647],[-13.2894109,8.4302254],[-13.2893587,8.4300874],[-13.2892943,8.4299044],[-13.289171,8.4295701],[-13.2891226,8.4294003],[-13.2890597,8.4291535],[-13.2889777,8.4287741],[-13.2889027,8.4283681],[-13.2888491,8.4280231],[-13.2888088,8.4276596],[-13.2887874,8.4270733],[-13.2888302,8.4267151],[-13.2888597,8.4264207],[-13.2889376,8.4261235],[-13.2890314,8.4258927],[-13.2891655,8.4256644],[-13.2892702,8.4255131],[-13.2894633,8.425301],[-13.2896268,8.425147],[-13.2897141,8.4250396],[-13.2897745,8.4250065],[-13.2898549,8.4249984],[-13.2899193,8.424976],[-13.2899636,8.4249468],[-13.2901016,8.4249029],[-13.2901795,8.4248871],[-13.2902385,8.4248976],[-13.2903109,8.4249666],[-13.2903914,8.425009],[-13.2904933,8.4250064],[-13.2905764,8.4249905],[-13.2907401,8.4249002],[-13.2907937,8.4248445],[-13.2908177,8.4247623],[-13.2908124,8.4246296],[-13.2908286,8.4245023],[-13.2908929,8.4244493],[-13.2909868,8.4244306],[-13.2910968,8.424412],[-13.2911612,8.4244359],[-13.2912792,8.4246032],[-13.2913409,8.4246429],[-13.2914066,8.4246363],[-13.2914455,8.4245899],[-13.2914562,8.4245341],[-13.2915179,8.424428],[-13.2916707,8.4243218],[-13.2917593,8.4242635],[-13.2918076,8.4242025],[-13.2918317,8.424099],[-13.2918693,8.4240221],[-13.2919149,8.4239636],[-13.2919872,8.4238761],[-13.2921508,8.423754],[-13.2922719,8.4236897],[-13.2927007,8.4235922],[-13.2929475,8.4236001],[-13.2931165,8.4235497],[-13.2932612,8.4234887],[-13.2933632,8.4233905],[-13.2934115,8.4232686],[-13.2934464,8.4231545],[-13.2934518,8.42299],[-13.2933751,8.4227322],[-13.29328,8.422499],[-13.2931728,8.4223665],[-13.2930468,8.4222391],[-13.2929072,8.4220799],[-13.2927811,8.4220029],[-13.2926444,8.4218729],[-13.2924485,8.4217057],[-13.2922822,8.421581],[-13.2921723,8.4214829],[-13.2920355,8.4213715],[-13.291963,8.4212653],[-13.2918933,8.4211062],[-13.2917941,8.421],[-13.2916144,8.4208699],[-13.2914856,8.42074],[-13.2913515,8.4206312],[-13.2911477,8.4204906],[-13.2909492,8.4204295],[-13.2907078,8.4202996],[-13.2903779,8.4202146],[-13.2901982,8.420196],[-13.2901016,8.4202225],[-13.2900211,8.4203181],[-13.2899621,8.4203897],[-13.289887,8.4204136],[-13.2897663,8.4203685],[-13.2896939,8.4203074],[-13.2896243,8.4202412],[-13.2895035,8.4202253],[-13.2894177,8.4201802],[-13.289313,8.4200952],[-13.2892245,8.4200634],[-13.2891344,8.4200678],[-13.2890636,8.4200289],[-13.289018,8.4200528],[-13.2889965,8.4201404],[-13.2889349,8.4201961],[-13.288841,8.420212],[-13.2887418,8.4201961],[-13.2886237,8.4201164],[-13.2885433,8.420005],[-13.2884896,8.4199147],[-13.2884682,8.4197609],[-13.2884038,8.4196309],[-13.288275,8.4194902],[-13.2880926,8.4193709],[-13.2878594,8.4192568],[-13.2876019,8.4191533],[-13.2873657,8.4191479],[-13.2871833,8.4191718],[-13.2869903,8.4191719],[-13.2867731,8.4192329],[-13.2866094,8.419331],[-13.2864753,8.4194001],[-13.286293,8.4194399],[-13.2861025,8.4194611],[-13.2859121,8.4195062],[-13.2857913,8.4195698],[-13.2856975,8.4197371],[-13.2856653,8.4198644],[-13.2855795,8.4200263],[-13.2854453,8.4201801],[-13.2853004,8.4203844],[-13.2851477,8.4205808],[-13.2850457,8.4207188],[-13.2848793,8.4208566],[-13.2847292,8.4210106],[-13.2846005,8.4211884],[-13.284453,8.4213264],[-13.2841873,8.4214935],[-13.2837448,8.421605],[-13.2833693,8.4216395],[-13.2829751,8.4216978],[-13.2826987,8.4216766],[-13.2823716,8.4215466],[-13.2821113,8.4214219],[-13.2817144,8.4211937],[-13.2812959,8.4208858],[-13.2808856,8.4204853],[-13.2807527,8.4203352],[-13.2806093,8.4201735],[-13.2805114,8.4200369],[-13.2804269,8.4198459],[-13.2803733,8.4196919],[-13.2803598,8.4195327],[-13.2803438,8.419408],[-13.2802526,8.4192515],[-13.280093,8.419026],[-13.2799964,8.4189079],[-13.279967,8.4188442],[-13.2799789,8.4187115],[-13.2799709,8.4186174],[-13.2798851,8.418429],[-13.27981,8.4182578],[-13.2797496,8.4181291],[-13.2796691,8.4179831],[-13.2794614,8.4178293],[-13.2793245,8.417682],[-13.2791288,8.4174526],[-13.278847,8.4170784],[-13.2785386,8.4167176],[-13.2781028,8.4161352],[-13.2778198,8.4156893],[-13.2777207,8.4155278],[-13.2776011,8.4153152],[-13.2770406,8.4144278],[-13.2765993,8.4138812],[-13.2760468,8.4132085],[-13.2757853,8.4128941],[-13.275497,8.4124988],[-13.2753213,8.4122507],[-13.2748614,8.4115727],[-13.2742995,8.4107568],[-13.2735095,8.4096609],[-13.2728618,8.4086513],[-13.2726714,8.4083502],[-13.272501,8.408065],[-13.2723978,8.407846],[-13.2722301,8.4074281],[-13.2721027,8.4070886],[-13.2720384,8.4068988],[-13.2719753,8.4067143],[-13.2719284,8.4065446],[-13.2718921,8.4064226],[-13.2718627,8.4063005],[-13.2718545,8.4061718],[-13.2718855,8.4059954],[-13.2719284,8.4058998],[-13.2719847,8.4058627],[-13.2720705,8.4058481],[-13.2721389,8.4058229],[-13.272155,8.4057751],[-13.2721309,8.4057393],[-13.2720799,8.4057088],[-13.2720343,8.4056783],[-13.2719887,8.4056425],[-13.271919,8.4055881],[-13.2718358,8.4055017],[-13.2717071,8.4052934],[-13.2715663,8.4050229],[-13.2713598,8.4046633],[-13.2709829,8.403773],[-13.2706475,8.4029558],[-13.2706262,8.4028617],[-13.2706007,8.4028259],[-13.2705618,8.4028232],[-13.2705149,8.4028139],[-13.2704813,8.4027834],[-13.2704558,8.402729],[-13.2704371,8.402672],[-13.2704009,8.4025579],[-13.2703754,8.4023841],[-13.2703137,8.4018521],[-13.2702909,8.4014526],[-13.270248,8.4009459],[-13.270189,8.40054],[-13.2700897,8.4001339],[-13.2700173,8.3996271],[-13.2698778,8.3993247],[-13.2698269,8.3990938],[-13.269792,8.3988099],[-13.2697276,8.3983668],[-13.2697007,8.3980789],[-13.2696968,8.3979356],[-13.2697129,8.3978082],[-13.2697719,8.397722],[-13.2698308,8.3976834],[-13.2699381,8.3976636],[-13.2700361,8.3976874],[-13.270079,8.3977087],[-13.2701326,8.3976981],[-13.270189,8.3976477],[-13.2702319,8.3975097],[-13.2703471,8.3973479],[-13.270425,8.3972018],[-13.2704411,8.3970905],[-13.2703848,8.3970188],[-13.2702989,8.3969817],[-13.2702077,8.3969605],[-13.2701139,8.3969525],[-13.270028,8.3969551],[-13.2699207,8.3970109],[-13.2698001,8.3971568],[-13.2697223,8.397316],[-13.2696901,8.3974167],[-13.2696954,8.3974991],[-13.2696894,8.3975641],[-13.2696727,8.3976325],[-13.2696405,8.397659],[-13.2695426,8.3976955],[-13.2694097,8.397714],[-13.2692656,8.3977061],[-13.2690946,8.3976928],[-13.2689458,8.397649],[-13.2687553,8.3975787],[-13.2685354,8.3974606],[-13.2683812,8.3973677],[-13.268239,8.3972722],[-13.2680875,8.3971701],[-13.2679238,8.3970439],[-13.2677401,8.3969047],[-13.2676181,8.396792],[-13.2674947,8.3966739],[-13.2673136,8.3964722],[-13.2670696,8.3962188],[-13.2668711,8.3959852],[-13.2666257,8.3957412],[-13.2662944,8.3953537],[-13.26588,8.3948296],[-13.2656748,8.3945564],[-13.2654817,8.3941769],[-13.2651263,8.3935667],[-13.2646435,8.3926883],[-13.2640923,8.3917025],[-13.263816,8.3911227],[-13.2633413,8.3900056],[-13.2631589,8.3896183],[-13.2629711,8.3890211],[-13.2628022,8.3884374],[-13.2626251,8.3878776],[-13.2625554,8.3875353],[-13.2625071,8.3871955],[-13.2624964,8.3868453],[-13.2625125,8.3865534],[-13.2625635,8.3862165],[-13.2626466,8.3859404],[-13.2628183,8.3856644],[-13.2630758,8.3853672],[-13.2631911,8.3854284],[-13.2632984,8.3854521],[-13.2634029,8.3854151],[-13.263478,8.3854231],[-13.263545,8.3854841],[-13.2636081,8.3855026],[-13.26369,8.3854735],[-13.2637569,8.3854682],[-13.2638454,8.3854231],[-13.2638803,8.38537],[-13.2639528,8.3852637],[-13.263946,8.3852147],[-13.2638428,8.385102],[-13.2638213,8.3850648],[-13.2638402,8.3849905],[-13.2639528,8.3848524],[-13.2639649,8.3847398],[-13.2639393,8.3846217],[-13.2638026,8.384481],[-13.2636337,8.3843377],[-13.2634887,8.3842343],[-13.2634243,8.3841361],[-13.2634136,8.3839689],[-13.2633948,8.3838389],[-13.2633492,8.3837089],[-13.2633331,8.3836266],[-13.2633305,8.3834674],[-13.2633493,8.383316],[-13.2633224,8.3832233],[-13.2631883,8.3830853],[-13.2630395,8.3829022],[-13.2629134,8.382743],[-13.262782,8.3825983],[-13.2625823,8.3823846],[-13.2623086,8.3822069],[-13.2620082,8.3820026],[-13.2617695,8.381862],[-13.2616299,8.3818089],[-13.2615039,8.381801],[-13.2614127,8.3817797],[-13.2613134,8.3817214],[-13.2612116,8.381586],[-13.261107,8.3813684],[-13.2610452,8.381241],[-13.2609674,8.3811693],[-13.2608736,8.3811269],[-13.2607877,8.3811216],[-13.2606831,8.3810872],[-13.260541,8.3810129],[-13.2604605,8.3809225],[-13.2603908,8.3808165],[-13.26036,8.380721],[-13.2603774,8.3806361],[-13.2604256,8.3805829],[-13.2604927,8.3805431],[-13.260533,8.3804861],[-13.260541,8.3803999],[-13.2605195,8.3802513],[-13.2605196,8.3801611],[-13.2604873,8.3801066],[-13.2604283,8.3800974],[-13.2603586,8.3801397],[-13.2602835,8.3801239],[-13.2602111,8.3800257],[-13.2601601,8.3799168],[-13.2601748,8.3798173],[-13.2601976,8.3797391],[-13.2601924,8.3796622],[-13.2601708,8.3795851],[-13.260136,8.3795162],[-13.2600863,8.3794816],[-13.2599884,8.3794791],[-13.2598919,8.3794684],[-13.2598288,8.3794392],[-13.2597792,8.3793914],[-13.2597685,8.3793172],[-13.2597819,8.3792297],[-13.2597927,8.3791421],[-13.2597336,8.3790572],[-13.2596746,8.3789907],[-13.2596049,8.3789377],[-13.2595351,8.3788927],[-13.2594962,8.3788892],[-13.2594674,8.3789059],[-13.2594413,8.3789563],[-13.2594171,8.3789722],[-13.2593843,8.3789688],[-13.2593501,8.3789537],[-13.2592965,8.3788449],[-13.2592428,8.3787785],[-13.2591301,8.3787042],[-13.2590389,8.3786751],[-13.2589531,8.378659],[-13.2589263,8.3786736],[-13.2589155,8.3787228],[-13.2588821,8.378752],[-13.2588498,8.3787652],[-13.2588076,8.3788044],[-13.2587466,8.3788275],[-13.2586983,8.3788395],[-13.258654,8.3788514],[-13.2585897,8.3788501],[-13.2584783,8.3788156],[-13.2582825,8.3787109],[-13.2580143,8.3784773],[-13.2578319,8.3783008],[-13.2577167,8.3781231],[-13.2576525,8.3781338],[-13.257663,8.3779784],[-13.2575972,8.3778351],[-13.2575035,8.3777025],[-13.2574524,8.3776122],[-13.2573813,8.3775193],[-13.2572123,8.377384],[-13.257026,8.3772526],[-13.2568181,8.3770709],[-13.2567081,8.3769461],[-13.2565888,8.3768534],[-13.256456,8.3767869],[-13.2563769,8.3767937],[-13.2563084,8.3768161],[-13.2562333,8.376799],[-13.2561502,8.3767471],[-13.2560858,8.3766609],[-13.2560416,8.3765932],[-13.2560147,8.3765189],[-13.2559919,8.3764633],[-13.2559867,8.3763771],[-13.2559866,8.3763159],[-13.2559825,8.3762589],[-13.2559584,8.3761885],[-13.2559437,8.3761369],[-13.2558887,8.3760851],[-13.2557881,8.3760426],[-13.2556218,8.3759948],[-13.2555065,8.375959],[-13.2554367,8.3759404],[-13.2553496,8.3759021],[-13.2552771,8.3758635],[-13.2552142,8.3757959],[-13.2551685,8.3757083],[-13.2551283,8.3755982],[-13.2550961,8.3754987],[-13.2550948,8.3753488],[-13.2551014,8.3753036],[-13.2550974,8.3752518],[-13.255076,8.3752067],[-13.2550412,8.3751829],[-13.2549995,8.3751881],[-13.2549767,8.3752213],[-13.254962,8.3753089],[-13.2549365,8.3753898],[-13.2548708,8.3754694],[-13.2548091,8.3755318],[-13.2547447,8.3755597],[-13.2546173,8.3755558],[-13.2544617,8.3755332],[-13.2541747,8.3754854],[-13.2540165,8.3754522],[-13.2539065,8.3754177],[-13.25381,8.375358],[-13.2535377,8.3751616],[-13.2532897,8.3749891],[-13.2530751,8.3748233],[-13.2528564,8.3745818],[-13.2526258,8.3743536],[-13.2523535,8.3740325],[-13.2521296,8.3737473],[-13.2519016,8.3734381],[-13.2515329,8.3729166],[-13.2513423,8.372634],[-13.2510312,8.3720237],[-13.2505444,8.3711759],[-13.2502627,8.3706053],[-13.2500335,8.3701503],[-13.2498819,8.369849],[-13.2497223,8.3695678],[-13.2494232,8.3690636],[-13.2489404,8.3683073],[-13.2485637,8.3677248],[-13.2477872,8.3666249],[-13.2469448,8.3655793],[-13.2462824,8.364632],[-13.2455073,8.3635546],[-13.2447241,8.362448],[-13.2440106,8.3614953],[-13.2427983,8.3599906],[-13.2421411,8.3591627],[-13.2415698,8.3584462],[-13.2403514,8.3569617],[-13.2402648,8.3568719],[-13.2400066,8.3565404],[-13.2398977,8.356413],[-13.2398645,8.3563726],[-13.2361222,8.3517588],[-13.2349608,8.3500603],[-13.2345183,8.3488555],[-13.2343412,8.3481629],[-13.2342929,8.3479401],[-13.2342607,8.3478551],[-13.2342474,8.3477834],[-13.2342204,8.3477012],[-13.2342044,8.3476296],[-13.2341695,8.3475447],[-13.2341453,8.3474703],[-13.2341802,8.3474039],[-13.2342312,8.3473641],[-13.2343358,8.347319],[-13.2344243,8.3472925],[-13.2344995,8.3471783],[-13.2345369,8.3470059],[-13.2345022,8.346836],[-13.2342205,8.3465122],[-13.2340246,8.3463505],[-13.2339817,8.3462309],[-13.2340166,8.3461488],[-13.234089,8.3460903],[-13.234132,8.3460479],[-13.2341401,8.3459815],[-13.234065,8.3458462],[-13.2339951,8.3457772],[-13.2339336,8.3456232],[-13.2339656,8.3454879],[-13.233979,8.3453684],[-13.2339536,8.3452756],[-13.233837,8.3451853],[-13.2337269,8.3451269],[-13.2335848,8.3450527],[-13.2334212,8.3449677],[-13.2333031,8.3448801],[-13.2332549,8.3447156],[-13.2331906,8.3446174],[-13.2330994,8.3445378],[-13.2330269,8.3445484],[-13.2328901,8.3444608],[-13.2327747,8.344437],[-13.2326997,8.3444768],[-13.2326246,8.3445299],[-13.2324797,8.3446121],[-13.2323429,8.3446864],[-13.2321927,8.3446839],[-13.23208,8.3446068],[-13.2319352,8.3445298],[-13.2317528,8.344498],[-13.231592,8.3444769],[-13.231474,8.34451],[-13.2313693,8.3445378],[-13.2312365,8.3446122],[-13.2311332,8.3446851],[-13.2309964,8.3447275],[-13.2308262,8.3447369],[-13.2306947,8.3447209],[-13.2305405,8.3446665],[-13.2303153,8.3445671],[-13.2302079,8.3444967],[-13.2301395,8.3444078],[-13.2301261,8.3443348],[-13.2301354,8.3442698],[-13.2301703,8.3441596],[-13.2301798,8.3440813],[-13.2301676,8.3440097],[-13.2301234,8.3439606],[-13.2300282,8.3439327],[-13.2299504,8.3438956],[-13.229827,8.3438345],[-13.2296929,8.3437058],[-13.2295896,8.3435678],[-13.2295132,8.3435148],[-13.2294301,8.3435041],[-13.2293388,8.3435041],[-13.2289445,8.34354],[-13.2288561,8.3435414],[-13.2287326,8.3435201],[-13.2278676,8.3435081],[-13.2277147,8.3435202],[-13.2276115,8.3435678],[-13.2272145,8.3437005],[-13.2271019,8.3437523],[-13.227043,8.3438014],[-13.2269208,8.3439115],[-13.226835,8.3439473],[-13.2267399,8.3439619],[-13.2265292,8.3440283],[-13.2264502,8.3440443],[-13.2259731,8.3438564],[-13.2259566,8.3437988],[-13.2259311,8.3437244],[-13.2258923,8.3435639],[-13.2257728,8.3433369],[-13.2256817,8.3432693],[-13.2255931,8.3432547],[-13.2255288,8.3432707],[-13.2254725,8.3433356],[-13.2253867,8.3435454],[-13.2253679,8.3435658],[-13.2253351,8.3435757],[-13.225282,8.3436051],[-13.2251734,8.343625],[-13.2250674,8.3436396],[-13.2249387,8.3436276],[-13.2248394,8.3436038],[-13.2247362,8.3435666],[-13.2246748,8.3435141],[-13.2242508,8.3433768],[-13.2239303,8.3432892],[-13.2237438,8.3431989],[-13.223595,8.3431791],[-13.2233026,8.3431419],[-13.2230626,8.3430782],[-13.2227219,8.342992],[-13.2224698,8.342923],[-13.2221761,8.3428009],[-13.2220044,8.3427107],[-13.2218918,8.3426324],[-13.2217885,8.3425899],[-13.2216464,8.3425634],[-13.2214868,8.3425635],[-13.2213594,8.3425833],[-13.2212454,8.3425567],[-13.2210724,8.3424731],[-13.2208618,8.3423577],[-13.2206553,8.3422476],[-13.2205748,8.3421812],[-13.2205158,8.3420911],[-13.2204809,8.3420007],[-13.220442,8.341876],[-13.2204099,8.3418044],[-13.2203589,8.3417088],[-13.2202503,8.3415217],[-13.2201041,8.3413068],[-13.2200531,8.3412484],[-13.2200048,8.3412298],[-13.219911,8.3412046],[-13.2198104,8.3412139],[-13.2197219,8.3412258],[-13.2196696,8.3412364],[-13.2196374,8.341251],[-13.2196293,8.3412935],[-13.2196494,8.3413346],[-13.2198734,8.341539],[-13.2198774,8.3415789],[-13.2198721,8.3416305],[-13.2198292,8.3417075],[-13.219742,8.3418044],[-13.2195355,8.3420578],[-13.2193517,8.3422303],[-13.219286,8.3422621],[-13.219164,8.3422821],[-13.2190017,8.3423059],[-13.2188984,8.3423006],[-13.218771,8.3422754],[-13.2187281,8.3422502],[-13.2187093,8.3422024],[-13.2187227,8.3421268],[-13.2187375,8.3420512],[-13.2187402,8.3419808],[-13.218712,8.3419264],[-13.2186691,8.3418813],[-13.2185283,8.3418482],[-13.2184237,8.3418402],[-13.2183513,8.3418853],[-13.2183016,8.3419344],[-13.218244,8.3419928],[-13.2181648,8.3420193],[-13.21802,8.3420193],[-13.2179623,8.3420206],[-13.2178913,8.3419941],[-13.2177303,8.3418946],[-13.2176973,8.3418747],[-13.2175841,8.3418057],[-13.2174782,8.3417314],[-13.2174111,8.341673],[-13.217206,8.3413864],[-13.2170289,8.3411502],[-13.2167808,8.3408861],[-13.2164241,8.3406499],[-13.2160969,8.3404138],[-13.2157187,8.3401988],[-13.2154022,8.3399772],[-13.2151648,8.3397622],[-13.2147692,8.3394438],[-13.2144473,8.3391067],[-13.2141965,8.338844],[-13.2139632,8.3385879],[-13.2138465,8.3384048],[-13.2136534,8.3380545],[-13.2135232,8.337825],[-13.2134441,8.3376857],[-13.213377,8.3375742],[-13.2133141,8.3374534],[-13.2132322,8.3373566],[-13.2131277,8.3372318],[-13.2130619,8.337123],[-13.2129815,8.3370208],[-13.2129305,8.3369584],[-13.2128742,8.3369532],[-13.2128326,8.3369903],[-13.2128513,8.3370846],[-13.2128621,8.3371455],[-13.2128366,8.3371814],[-13.2127735,8.3371868],[-13.2127119,8.3371628],[-13.2126663,8.3371814],[-13.2126422,8.3372359],[-13.2126086,8.3374003],[-13.2125711,8.3374574],[-13.2124786,8.3375091],[-13.2124114,8.337553],[-13.2123404,8.3376126],[-13.2123001,8.3376804],[-13.2122371,8.3377281],[-13.2121485,8.3377785],[-13.2120709,8.3377931],[-13.2120198,8.3377679],[-13.2117717,8.3375954],[-13.211706,8.3375967],[-13.2116403,8.337622],[-13.2115115,8.3376962],[-13.211474,8.3377028],[-13.2114218,8.3376776],[-13.2111522,8.3374773],[-13.2110904,8.3374627],[-13.2110113,8.3374561],[-13.2109456,8.3374069],[-13.2108799,8.3373593],[-13.2108209,8.337326],[-13.2107592,8.337346],[-13.2106506,8.3372531],[-13.210544,8.3373253],[-13.2104789,8.33735],[-13.2103837,8.3373739],[-13.2102844,8.3373472],[-13.2101999,8.3373207],[-13.2100283,8.3372716],[-13.2098781,8.3372185],[-13.2096984,8.3371721],[-13.2095362,8.3371508],[-13.2094006,8.3371548],[-13.2093054,8.3371642],[-13.2091901,8.3371588],[-13.2091002,8.3371151],[-13.2090426,8.3370235],[-13.208942,8.3369598],[-13.2088602,8.336908],[-13.2087113,8.3368178],[-13.2085785,8.3367514],[-13.2084727,8.3367196],[-13.2083304,8.3366824],[-13.2082044,8.3366785],[-13.2080233,8.3367222],[-13.2079587,8.3367417],[-13.2078275,8.3367514],[-13.20768,8.3367461],[-13.2075003,8.3367116],[-13.2072508,8.3366347],[-13.2069531,8.3365099],[-13.2066957,8.3363772],[-13.2064006,8.3362021],[-13.2061325,8.3359898],[-13.2057006,8.335597],[-13.205301,8.3352334],[-13.2049228,8.3348513],[-13.2045044,8.334355],[-13.2042335,8.3340551],[-13.2040536,8.3339146],[-13.2038767,8.3335005],[-13.2037426,8.3332617],[-13.2036137,8.3329936],[-13.2036352,8.3327787],[-13.2036353,8.3325238],[-13.20363,8.3322611],[-13.2035494,8.332017],[-13.2033375,8.331648],[-13.203064,8.3312207],[-13.2027609,8.3307908],[-13.2026429,8.3306156],[-13.2023505,8.3302548],[-13.2021923,8.3300371],[-13.2020796,8.3298911],[-13.2017524,8.3294904],[-13.2016049,8.3292968],[-13.2014949,8.3291772],[-13.201393,8.329026],[-13.2013072,8.3288826],[-13.2012186,8.3287446],[-13.2010979,8.3285854],[-13.2009799,8.3284182],[-13.2008646,8.328243],[-13.2002021,8.3273699],[-13.1999607,8.3270143],[-13.1997273,8.3266242],[-13.1993572,8.3259819],[-13.1991265,8.3255626],[-13.1986223,8.3245992],[-13.1984479,8.3242489],[-13.198236,8.3237499],[-13.1976218,8.3221921],[-13.1974448,8.3216613],[-13.1971015,8.3206315],[-13.1968145,8.3196336],[-13.1966106,8.3188215],[-13.1964336,8.3180518],[-13.1963129,8.3172556],[-13.196184,8.3161304],[-13.1961438,8.3154615],[-13.1961278,8.314453],[-13.1961895,8.3137524],[-13.196215,8.3134526],[-13.196235,8.3131817],[-13.1962002,8.3130066],[-13.1960821,8.3127306],[-13.195814,8.31229],[-13.1955726,8.311807],[-13.1954143,8.3114779],[-13.1952801,8.3111833],[-13.1951488,8.3108595],[-13.1949718,8.3105861],[-13.194784,8.3102822],[-13.1946097,8.3100487],[-13.1942637,8.309559],[-13.1937755,8.308914],[-13.1933236,8.308358],[-13.1929869,8.3079161],[-13.1926892,8.3075074],[-13.1924974,8.3072473],[-13.1923271,8.3069832],[-13.192099,8.3065958],[-13.1918618,8.3061538],[-13.1915371,8.3056004],[-13.191336,8.3051373],[-13.1911563,8.3046901],[-13.1909752,8.3041845],[-13.1908667,8.303732],[-13.1908196,8.3033352],[-13.190805,8.3028349],[-13.190833,8.3024713],[-13.1908787,8.3022072],[-13.1910744,8.301634],[-13.1913991,8.3013101],[-13.1918953,8.3010845],[-13.1921313,8.3009651],[-13.1924022,8.3007342],[-13.1926543,8.3005139],[-13.1928447,8.3004422],[-13.1930083,8.3004396],[-13.1931639,8.300551],[-13.193306,8.3007023],[-13.1934348,8.3008217],[-13.1935474,8.3008695],[-13.193652,8.3008563],[-13.1937675,8.3007846],[-13.1938747,8.3006545],[-13.1939256,8.3004874],[-13.1939229,8.3003652],[-13.1938693,8.3002432],[-13.1937486,8.3001504],[-13.1936065,8.3000467],[-13.1934188,8.2999008],[-13.1931774,8.2997495],[-13.1929655,8.2996672],[-13.1928232,8.2996062],[-13.1926248,8.2996168],[-13.192555,8.2995743],[-13.1925658,8.2994867],[-13.1926113,8.299431],[-13.1930191,8.2991178],[-13.1932579,8.2989426],[-13.193577,8.2986666],[-13.193652,8.29851],[-13.1936951,8.2983906],[-13.1936735,8.2982764],[-13.1934965,8.2981039],[-13.193357,8.2979633],[-13.193129,8.2977589],[-13.1928635,8.297597],[-13.1927375,8.2975651],[-13.1926194,8.2975227],[-13.1925657,8.2974059],[-13.192555,8.29726],[-13.1925631,8.2970848],[-13.1926113,8.2967928],[-13.1926301,8.2966256],[-13.1926114,8.2964982],[-13.1925738,8.2963416],[-13.1925095,8.2962037],[-13.1924155,8.2961293],[-13.192268,8.2960204],[-13.1921662,8.2959727],[-13.1920937,8.295901],[-13.1920078,8.2958373],[-13.1919167,8.2958639],[-13.1918415,8.2959382],[-13.1917611,8.2960125],[-13.1916485,8.2960205],[-13.1915411,8.2959461],[-13.1914151,8.2958983],[-13.1913428,8.2959329],[-13.1912971,8.2959886],[-13.1913079,8.2960709],[-13.191407,8.2961558],[-13.1914553,8.2962354],[-13.1914419,8.2963098],[-13.19134,8.2963761],[-13.1912407,8.2963973],[-13.1911254,8.2963788],[-13.1909725,8.2963018],[-13.1908813,8.2962142],[-13.1908411,8.2961239],[-13.1907901,8.2960417],[-13.1907392,8.2960231],[-13.1907043,8.2961055],[-13.1906882,8.2961904],[-13.1906399,8.2962407],[-13.1905299,8.2962699],[-13.1903852,8.2962753],[-13.1902135,8.2962381],[-13.1900875,8.2961426],[-13.1900017,8.2960204],[-13.1899935,8.2958851],[-13.1899586,8.2958162],[-13.1898809,8.2957789],[-13.1897282,8.295696],[-13.1893847,8.2953968],[-13.189138,8.2951207],[-13.1889394,8.2948846],[-13.1888939,8.2947889],[-13.1889207,8.2946245],[-13.1889797,8.2945422],[-13.1889636,8.2945024],[-13.1888993,8.2944838],[-13.188792,8.2945183],[-13.1886899,8.2945183],[-13.1884755,8.2944227],[-13.1882207,8.294197],[-13.1880705,8.2939583],[-13.1878988,8.2935813],[-13.1877969,8.2932284],[-13.1877486,8.2929204],[-13.1877486,8.2927002],[-13.1877969,8.2924905],[-13.1879203,8.2922968],[-13.1880141,8.2922331],[-13.1881214,8.292241],[-13.1882528,8.2923313],[-13.1883065,8.2923365],[-13.1883119,8.2922888],[-13.1882502,8.2921322],[-13.1881858,8.2920738],[-13.1879927,8.2919517],[-13.1878049,8.2917658],[-13.187711,8.2917075],[-13.187585,8.2916332],[-13.1875421,8.2916438],[-13.1874696,8.2916996],[-13.1873811,8.2917978],[-13.1872926,8.2918136],[-13.1871907,8.2917925],[-13.1868769,8.2916703],[-13.186386,8.2912934],[-13.1861232,8.2910598],[-13.1858737,8.290728],[-13.1856618,8.2903113],[-13.1854902,8.289953],[-13.1852917,8.2896743],[-13.1852434,8.289563],[-13.1852461,8.2894541],[-13.1853613,8.2892604],[-13.1854042,8.2891383],[-13.1854097,8.2890401],[-13.1854097,8.2888914],[-13.1853373,8.2886976],[-13.1852112,8.2885783],[-13.18512,8.2885464],[-13.1848438,8.2885358],[-13.1847606,8.2885144],[-13.1847123,8.2884137],[-13.1847392,8.2883208],[-13.1847848,8.2881881],[-13.1847767,8.2879917],[-13.1846909,8.287774],[-13.184656,8.2875431],[-13.1846855,8.2872935],[-13.1846426,8.2870786],[-13.1845299,8.2868583],[-13.1844334,8.2866884],[-13.1842698,8.2865478],[-13.1841008,8.2865052],[-13.1840418,8.2864337],[-13.1839935,8.2863381],[-13.1839827,8.2862557],[-13.1839694,8.2861842],[-13.1838727,8.2860354],[-13.1838204,8.2859617],[-13.1836072,8.2857859],[-13.1835441,8.2857156],[-13.1834892,8.2856228],[-13.1834704,8.2853732],[-13.1835027,8.2849977],[-13.1835858,8.2846978],[-13.1836769,8.284557],[-13.1837601,8.2845173],[-13.1838674,8.28452],[-13.1839479,8.2846102],[-13.1840606,8.2846394],[-13.184157,8.2845703],[-13.1842081,8.2843899],[-13.1841973,8.2842041],[-13.184259,8.2840794],[-13.1843502,8.284013],[-13.1844441,8.2839971],[-13.1845165,8.2839732],[-13.184538,8.2838936],[-13.1845004,8.2838431],[-13.1844279,8.2838085],[-13.1843556,8.2837688],[-13.1843476,8.283668],[-13.1843073,8.2835936],[-13.1842563,8.2835776],[-13.1841544,8.2836228],[-13.1840445,8.2836839],[-13.1839613,8.2837556],[-13.1838754,8.2837979],[-13.1837736,8.2837741],[-13.1836985,8.2836839],[-13.1836636,8.2835618],[-13.1836931,8.2834716],[-13.1836797,8.2834105],[-13.1836207,8.283376],[-13.1835134,8.283376],[-13.1834276,8.283384],[-13.1833524,8.2834024],[-13.1831727,8.2834901],[-13.1830172,8.2835804],[-13.1828643,8.2837104],[-13.1828025,8.2838245],[-13.1828106,8.2839971],[-13.1827489,8.2840766],[-13.1826041,8.2840926],[-13.1823948,8.2840766],[-13.1822876,8.2839679],[-13.1822017,8.2838059],[-13.1821132,8.2836493],[-13.1819993,8.2834543],[-13.1819147,8.2833946],[-13.1818397,8.283315],[-13.1817351,8.2832221],[-13.1816305,8.2832035],[-13.1813703,8.2832061],[-13.1809008,8.2832644],[-13.1806863,8.2832486],[-13.1805683,8.2831796],[-13.180461,8.2830655],[-13.1803402,8.2830255],[-13.179777,8.28306],[-13.179474,8.2830018],[-13.1793157,8.282946],[-13.1791736,8.2829513],[-13.1790475,8.2830575],[-13.1788946,8.2831212],[-13.1786774,8.2830734],[-13.1784521,8.283092],[-13.1782616,8.283169],[-13.1780363,8.2832672],[-13.1777921,8.2832618],[-13.1773819,8.2830787],[-13.1771914,8.2829885],[-13.1769955,8.2829618],[-13.1768615,8.2829274],[-13.1767194,8.2828133],[-13.1765074,8.2826009],[-13.1763197,8.282386],[-13.1760567,8.282208],[-13.1758637,8.282094],[-13.1757833,8.2819825],[-13.1757511,8.2818525],[-13.1758128,8.2816162],[-13.1759468,8.2815259],[-13.1759817,8.281449],[-13.1759147,8.2813508],[-13.1757966,8.2812419],[-13.1757377,8.2811863],[-13.1756438,8.2812048],[-13.1756062,8.2812792],[-13.1756626,8.2814172],[-13.1756277,8.2815021],[-13.1755526,8.2815605],[-13.1754211,8.2816135],[-13.1753434,8.2816746],[-13.1752789,8.2819347],[-13.1751958,8.2821815],[-13.1750777,8.2823965],[-13.174992,8.2827018],[-13.1749035,8.2831398],[-13.1748283,8.2833467],[-13.1747238,8.2833972],[-13.1731251,8.2830866],[-13.1727791,8.2830521],[-13.1725538,8.2830999],[-13.1723553,8.2832565],[-13.1722266,8.2834449],[-13.1721917,8.2841907],[-13.1721005,8.2844137],[-13.1719261,8.2845411],[-13.171666,8.2847641],[-13.1712073,8.285194],[-13.1709042,8.2853905],[-13.1704938,8.2855179],[-13.1703061,8.2855285],[-13.1701961,8.2853905],[-13.1701934,8.285194],[-13.1702283,8.2849074],[-13.170062,8.2846128],[-13.1697857,8.2843792],[-13.1693834,8.284273],[-13.1690455,8.2842757],[-13.1679377,8.2844562],[-13.1670365,8.2847986],[-13.16672,8.285064],[-13.1664839,8.2854329],[-13.1662425,8.2859956],[-13.1661406,8.2867309],[-13.1660199,8.2868476],[-13.1658,8.286845],[-13.1657061,8.2867574],[-13.1655023,8.2862983],[-13.1653842,8.2861973],[-13.1649336,8.2860062],[-13.1643409,8.285977],[-13.1637427,8.2861841],[-13.1633189,8.286346],[-13.1626001,8.2862876],[-13.1621066,8.2862398],[-13.1615326,8.2861602],[-13.1610455,8.2859976],[-13.1606931,8.2858815],[-13.1597677,8.2857753],[-13.159285,8.2858312],[-13.1591213,8.2857674],[-13.1589764,8.2856453],[-13.1591079,8.2854701],[-13.1594297,8.2854037],[-13.1597596,8.2851595],[-13.1603658,8.284772],[-13.1612402,8.2843712],[-13.1619778,8.2840156],[-13.1623265,8.2839466],[-13.1626269,8.2837581],[-13.1629407,8.2835856],[-13.1632547,8.2833865],[-13.163826,8.2828371],[-13.1643544,8.2824045],[-13.1649176,8.2821443],[-13.165564,8.2818046],[-13.1660147,8.2815498],[-13.1668166,8.2813693],[-13.1674443,8.2809951],[-13.1680987,8.2807535],[-13.1688068,8.2805969],[-13.1697644,8.2803235],[-13.1707005,8.2799864],[-13.1711055,8.2797555],[-13.1712289,8.2795034],[-13.1712503,8.2791583],[-13.1711028,8.2788212],[-13.17062,8.2783992],[-13.1699548,8.2779002],[-13.1696571,8.2774808],[-13.1694264,8.2769234],[-13.1694103,8.2764934],[-13.1693084,8.2761749],[-13.1691314,8.2759413],[-13.1688739,8.2756441],[-13.1687264,8.2753866],[-13.1686575,8.2752457],[-13.1685681,8.2750628],[-13.1684125,8.2746567],[-13.1682543,8.2743355],[-13.168037,8.2737145],[-13.1677527,8.2728544],[-13.1674175,8.2715459],[-13.1673075,8.2707681],[-13.1672672,8.2701617],[-13.1672806,8.2699215],[-13.1675811,8.2690747],[-13.1678064,8.2686102],[-13.1681443,8.2681589],[-13.1682623,8.2679812],[-13.1683777,8.2679148],[-13.1685332,8.267875],[-13.1686459,8.26792],[-13.1687693,8.2681298],[-13.1689356,8.2685067],[-13.1690187,8.2686368],[-13.1690965,8.2686925],[-13.1691716,8.2686687],[-13.1692226,8.2686315],[-13.1692199,8.2685332],[-13.1691072,8.2683368],[-13.1689597,8.2681324],[-13.1688497,8.2678246],[-13.1688444,8.2676122],[-13.168898,8.2674555],[-13.1690134,8.2672644],[-13.169346,8.2670654],[-13.1695337,8.2670469],[-13.1697148,8.2670907],[-13.1698422,8.2670522],[-13.1699897,8.267007],[-13.170156,8.2670123],[-13.1702606,8.2669858],[-13.1702874,8.2668902],[-13.1702311,8.2667867],[-13.1701318,8.2667602],[-13.1700138,8.266808],[-13.1699307,8.2668531],[-13.1697349,8.2669009],[-13.1696437,8.2668956],[-13.1695283,8.2668291],[-13.1694479,8.2667043],[-13.1694023,8.2664973],[-13.1693889,8.2663196],[-13.1694278,8.2662572],[-13.1694935,8.266228],[-13.1695297,8.2661736],[-13.169527,8.2661125],[-13.1694948,8.266086],[-13.1694465,8.2660316],[-13.16946,8.2659041],[-13.1694787,8.265786],[-13.1695243,8.2656547],[-13.1695954,8.2655444],[-13.1697188,8.2654197],[-13.1699065,8.2653374],[-13.1701453,8.2652684],[-13.1703491,8.2652976],[-13.1704671,8.2653347],[-13.1705798,8.2652976],[-13.1706415,8.2651941],[-13.1706334,8.2650773],[-13.1705342,8.264979],[-13.1705127,8.2648676],[-13.1705583,8.2647641],[-13.1707568,8.2645888],[-13.1708748,8.2643951],[-13.170899,8.2643102],[-13.170966,8.2642359],[-13.1710948,8.2642014],[-13.1711967,8.2642094],[-13.1713147,8.2642278],[-13.1716688,8.264188],[-13.1717331,8.2642173],[-13.1717626,8.2642837],[-13.1717895,8.2644164],[-13.1718243,8.2646234],[-13.1718538,8.2647243],[-13.1719504,8.2647668],[-13.1720577,8.264764],[-13.1722079,8.2647587],[-13.1723929,8.2645916],[-13.1725002,8.2644615],[-13.1725566,8.2642359],[-13.1725244,8.2640394],[-13.1725351,8.2638748],[-13.1725914,8.2637527],[-13.1726639,8.2636732],[-13.1727041,8.263567],[-13.1726478,8.26349],[-13.1725163,8.2634794],[-13.1724198,8.2634104],[-13.1723715,8.2633121],[-13.1723581,8.2630997],[-13.1724064,8.2628608],[-13.1724171,8.2626698],[-13.172468,8.2624786],[-13.1725834,8.2623034],[-13.1726907,8.2621389],[-13.1728167,8.2619133],[-13.1729535,8.2618072],[-13.1730152,8.2616824],[-13.1730501,8.2615178],[-13.173034,8.2612735],[-13.1730179,8.2611275],[-13.1729321,8.2610586],[-13.1728248,8.2610507],[-13.1726558,8.2610162],[-13.172511,8.2609657],[-13.1723903,8.2608967],[-13.17235,8.2607852],[-13.1723769,8.260687],[-13.1724788,8.2606499],[-13.1728516,8.2606313],[-13.1731171,8.2605755],[-13.1732808,8.2605543],[-13.1734336,8.2604986],[-13.1736159,8.2604839],[-13.1736764,8.2605038],[-13.1737327,8.2605915],[-13.1737957,8.260586],[-13.1738333,8.2605384],[-13.1737984,8.2603738],[-13.1738145,8.2602012],[-13.173903,8.2601243],[-13.1739835,8.2601296],[-13.1740506,8.2601747],[-13.1741203,8.2603419],[-13.1741873,8.2603446],[-13.1742544,8.2603074],[-13.1743241,8.2600738],[-13.1743483,8.2599172],[-13.1743161,8.2596279],[-13.1742571,8.2594394],[-13.1740827,8.2591421],[-13.174005,8.2590785],[-13.1737019,8.2590943],[-13.1735302,8.2591023],[-13.1734149,8.2590226],[-13.1733746,8.2589244],[-13.1734283,8.2587944],[-13.1738762,8.2586697],[-13.1742571,8.2585846],[-13.1744502,8.2585263],[-13.1744985,8.2584466],[-13.1745092,8.2583431],[-13.1743966,8.2581493],[-13.1743107,8.2578918],[-13.1742624,8.2577379],[-13.1741364,8.2575786],[-13.1737528,8.2573319],[-13.1734068,8.2571035],[-13.1731735,8.2570107],[-13.1728114,8.2568248],[-13.1724198,8.2567876],[-13.1720684,8.256708],[-13.1718994,8.2567426],[-13.1717734,8.256716],[-13.1715856,8.2566178],[-13.1714703,8.2565966],[-13.1713764,8.2566789],[-13.1712342,8.2567187],[-13.1710358,8.2566975],[-13.1706978,8.2565992],[-13.1705825,8.2564267],[-13.1704779,8.2561824],[-13.1700862,8.255986],[-13.1698797,8.2558665],[-13.1696115,8.2558081],[-13.1693191,8.2557179],[-13.1691072,8.2557021],[-13.1689731,8.2556382],[-13.1688149,8.2556224],[-13.1686513,8.2556755],[-13.1685225,8.2556276],[-13.1682838,8.2554578],[-13.1679995,8.2553437],[-13.1677098,8.2553039],[-13.167506,8.2552826],[-13.1673477,8.2551712],[-13.1670929,8.2547385],[-13.1668542,8.2543349],[-13.1664787,8.2534749],[-13.1661568,8.2526547],[-13.1658484,8.2517415],[-13.1656982,8.2511204],[-13.1656365,8.2506055],[-13.1656115,8.2504142],[-13.1655828,8.250194],[-13.165527,8.2499247],[-13.1654246,8.2495065],[-13.165092,8.2487448],[-13.164754,8.2478156],[-13.1644214,8.2467644],[-13.1642283,8.2458168],[-13.163995,8.2446302],[-13.1635229,8.2430004],[-13.1633137,8.242297],[-13.1631018,8.2413758],[-13.1630562,8.2408371],[-13.1630884,8.2406804],[-13.1631434,8.2405172],[-13.163193,8.2404017],[-13.1632064,8.2401522],[-13.1631661,8.239823],[-13.1631154,8.2396069],[-13.1630428,8.2392974],[-13.1630535,8.2389815],[-13.1630562,8.2387652],[-13.1630387,8.2386046],[-13.1629999,8.2384254],[-13.1630106,8.2382701],[-13.1630776,8.238144],[-13.1631782,8.2380379],[-13.1633351,8.2379117],[-13.1633968,8.2376887],[-13.1633646,8.2375161],[-13.1630803,8.2371073],[-13.1628657,8.236895],[-13.162627,8.2367437],[-13.162391,8.2365924],[-13.1619109,8.2363615],[-13.1616829,8.2362181],[-13.1614871,8.2360323],[-13.1611599,8.2356022],[-13.1608863,8.2351456],[-13.1606476,8.2346492],[-13.1605123,8.2343396],[-13.1604169,8.234121],[-13.160315,8.2338608],[-13.1601353,8.2334202],[-13.1600092,8.2330751],[-13.1598214,8.2325468],[-13.1596846,8.2321513],[-13.1595425,8.2316416],[-13.1593333,8.2309674],[-13.1591053,8.2300913],[-13.1588666,8.2291277],[-13.1586064,8.2281455],[-13.1584938,8.2276841],[-13.1584294,8.2273545],[-13.1581987,8.2263961],[-13.1580807,8.225905],[-13.1579412,8.2252732],[-13.1578592,8.2249625],[-13.1577937,8.2246335],[-13.157673,8.2241372],[-13.1575442,8.2235929],[-13.1574477,8.223115],[-13.1573779,8.2228018],[-13.1573055,8.2225045],[-13.157107,8.2216364],[-13.1570078,8.2211719],[-13.1569032,8.220694],[-13.1568147,8.2202773],[-13.1567315,8.2198047],[-13.1566001,8.2192287],[-13.1563855,8.218273],[-13.1563295,8.2180192],[-13.156246,8.2176411],[-13.1561388,8.2170598],[-13.1560637,8.2166881],[-13.1559483,8.2161572],[-13.1558223,8.2155493],[-13.1555782,8.2148325],[-13.1554736,8.2132662],[-13.1553609,8.211607],[-13.1553045,8.2107628],[-13.1553314,8.2102319],[-13.1556453,8.2093168],[-13.1563644,8.2085479],[-13.1563128,8.208479],[-13.1564006,8.2082534],[-13.1569639,8.207316],[-13.1569814,8.207044],[-13.1571322,8.2068213],[-13.1574477,8.2069055],[-13.1575576,8.2068843],[-13.1576781,8.2067939],[-13.1578393,8.2065816],[-13.1580592,8.2056764],[-13.1580779,8.2053578],[-13.1581263,8.2049596],[-13.1583114,8.2043968],[-13.1585152,8.2039295],[-13.1587861,8.203372],[-13.1591643,8.2027853],[-13.1594674,8.202196],[-13.1600897,8.2017925],[-13.1606761,8.2015249],[-13.1609215,8.2013384],[-13.1611437,8.2010491],[-13.1612457,8.2008766],[-13.1613395,8.2003828],[-13.1613556,8.1998359],[-13.1612993,8.1987235],[-13.1612778,8.1983704],[-13.1612027,8.1981846],[-13.160956,8.1978979],[-13.1608701,8.1977917],[-13.1608379,8.1976536],[-13.1607789,8.1972342],[-13.1608165,8.1966342],[-13.1609614,8.1962519],[-13.1611009,8.1958855],[-13.1613583,8.1953758],[-13.1616373,8.1949935],[-13.1619591,8.1947918],[-13.1621951,8.1947599],[-13.1624472,8.194744],[-13.1627905,8.1946273],[-13.1630481,8.1942714],[-13.1633003,8.1938626],[-13.1635416,8.1933211],[-13.1636676,8.1928537],[-13.1636488,8.1925246],[-13.1635684,8.1923095],[-13.1633967,8.192129],[-13.1631071,8.1917334],[-13.1628443,8.1911201],[-13.162686,8.1902175],[-13.1625599,8.1890387],[-13.1626378,8.1886192],[-13.1626914,8.1883936],[-13.1627987,8.1880909],[-13.1628711,8.1879237],[-13.1629112,8.1877751],[-13.1629033,8.187475],[-13.1626725,8.1869095],[-13.1624983,8.1865883],[-13.1624338,8.1863307],[-13.1624258,8.1860785],[-13.1623185,8.1853537],[-13.1623041,8.1849139],[-13.162458,8.1847617],[-13.162576,8.1846608],[-13.1626297,8.1844803],[-13.1625733,8.1843529],[-13.1623454,8.184236],[-13.1620501,8.1840099],[-13.1619221,8.1838809],[-13.1616292,8.1833891],[-13.1614602,8.1828369],[-13.1613314,8.1820431],[-13.1613154,8.1811564],[-13.1616185,8.1794997],[-13.1617095,8.1791589],[-13.1618967,8.1784579],[-13.1621147,8.1777501],[-13.1624125,8.1771674],[-13.1626914,8.1766217],[-13.1628898,8.1763616],[-13.163107,8.1761571],[-13.1632815,8.1761014],[-13.1635363,8.176027],[-13.163968,8.1756766],[-13.16407,8.1756819],[-13.1641665,8.1757297],[-13.1641933,8.1757828],[-13.16416,8.1758405],[-13.1640972,8.1759968],[-13.1641021,8.1760801],[-13.1641515,8.1761509],[-13.1642121,8.1761704],[-13.1642604,8.1761385],[-13.1643839,8.1760031],[-13.1645958,8.1757191],[-13.1648157,8.1755465],[-13.1650382,8.1752518],[-13.1649954,8.1751668],[-13.1649229,8.1751084],[-13.1648558,8.1750739],[-13.1647834,8.1750845],[-13.1647056,8.1751111],[-13.1645099,8.1752651],[-13.164416,8.175212],[-13.1646172,8.1749093],[-13.1648005,8.1746986],[-13.1648773,8.1743703],[-13.1648505,8.1739509],[-13.1647754,8.1737876],[-13.1646376,8.1735532],[-13.1645769,8.1733588],[-13.1644562,8.1731809],[-13.1642899,8.1730402],[-13.1642433,8.1729614],[-13.1641264,8.1727881],[-13.1640578,8.1726145],[-13.1639172,8.1725305],[-13.1637616,8.1724828],[-13.1636302,8.1724536],[-13.1633915,8.1722995],[-13.1633109,8.1722703],[-13.1632733,8.1722331],[-13.1632626,8.1721641],[-13.1632733,8.1720313],[-13.163268,8.1719118],[-13.1632438,8.1717924],[-13.1631392,8.1717074],[-13.1629649,8.1716198],[-13.1627101,8.1715056],[-13.1623451,8.1712838],[-13.1620772,8.1711313],[-13.1617924,8.1709775],[-13.1616239,8.1708153],[-13.1613074,8.1704544],[-13.1608897,8.1701647],[-13.1607195,8.1699551],[-13.1607119,8.1697268],[-13.1607038,8.1696312],[-13.1606556,8.169557],[-13.1605537,8.1695225],[-13.1604839,8.169557],[-13.1604704,8.1695994],[-13.1604785,8.1697427],[-13.160449,8.1698064],[-13.1602667,8.1699658],[-13.1599363,8.1700487],[-13.1594807,8.1700693],[-13.1593252,8.17008],[-13.1589898,8.1701622],[-13.1588948,8.1702372],[-13.1588504,8.1703215],[-13.1587377,8.1705537],[-13.1586358,8.1706242],[-13.1585501,8.1706482],[-13.1583622,8.1705976],[-13.1582617,8.1705978],[-13.1577937,8.1708526],[-13.1574852,8.1711924],[-13.1573483,8.1714685],[-13.1572062,8.1716171],[-13.1571607,8.1716332],[-13.1568924,8.1717658],[-13.1566155,8.1719521],[-13.1565708,8.1719685],[-13.1564029,8.17186],[-13.1562796,8.1720394],[-13.1562863,8.172058],[-13.1562741,8.1721203],[-13.1562045,8.1720978],[-13.1560985,8.1721429],[-13.1559886,8.1721774],[-13.1559295,8.1722226],[-13.1558892,8.1723234],[-13.1558882,8.1724485],[-13.1558597,8.172488],[-13.1556774,8.1725146],[-13.1555031,8.1725093],[-13.1553045,8.1725517],[-13.1551368,8.1726515],[-13.1550953,8.1727136],[-13.1550953,8.1728198],[-13.1550846,8.1728836],[-13.1550229,8.172942],[-13.1549263,8.1729606],[-13.154921,8.1730323],[-13.1549692,8.1730641],[-13.1553448,8.1731306],[-13.1554548,8.1731903],[-13.1554575,8.1734345],[-13.1554095,8.1735141],[-13.155314,8.1736456],[-13.1552241,8.1737465],[-13.1550337,8.1739403],[-13.1547834,8.1740764],[-13.1546609,8.1740917],[-13.1544838,8.1741076],[-13.1542022,8.174174],[-13.1539312,8.1743279],[-13.153714,8.1744156],[-13.153307,8.174836],[-13.1530079,8.1752824],[-13.152971,8.1753593],[-13.1529174,8.1754563],[-13.1528744,8.17565],[-13.152912,8.1757934],[-13.1528851,8.1759129],[-13.1528208,8.1759713],[-13.1527081,8.1759978],[-13.152534,8.1759765],[-13.1524399,8.1759792],[-13.1523675,8.1760483],[-13.1521556,8.1762792],[-13.1519573,8.1764382],[-13.1517425,8.1765527],[-13.1515306,8.1766536],[-13.151426,8.1766775],[-13.1512598,8.176667],[-13.1509647,8.1767093],[-13.1507663,8.1767732],[-13.1502056,8.1771713],[-13.1497846,8.1774767],[-13.1494715,8.1777343],[-13.1492133,8.1779626],[-13.1489718,8.178212],[-13.1488573,8.1783715],[-13.1486535,8.1786342],[-13.1483495,8.1789023],[-13.1480895,8.179006],[-13.1475127,8.1789899],[-13.1474215,8.1790191],[-13.1473222,8.1790855],[-13.146943,8.1794329],[-13.1467456,8.1795262],[-13.1463701,8.1797386],[-13.1461287,8.1798873],[-13.1456029,8.1800519],[-13.1449914,8.180259],[-13.1447339,8.1804661],[-13.144348,8.1812239],[-13.1443155,8.1815599],[-13.1439373,8.181836],[-13.1436121,8.1819807],[-13.1434927,8.1820325],[-13.1431192,8.1824307],[-13.1428349,8.1827281],[-13.1427437,8.1829059],[-13.1427303,8.1830095],[-13.142733,8.1830493],[-13.1427598,8.1830785],[-13.1428725,8.1831343],[-13.1429797,8.1832643],[-13.1430066,8.1833891],[-13.1430012,8.1835511],[-13.1429637,8.1836732],[-13.1428725,8.1837582],[-13.1427062,8.1838139],[-13.1425265,8.1838405],[-13.1423333,8.1839281],[-13.1421107,8.1840635],[-13.14199,8.1841776],[-13.1417245,8.1843502],[-13.1415072,8.1845228],[-13.1413919,8.1845865],[-13.1412953,8.1846316],[-13.1412041,8.1846529],[-13.14096,8.1846927],[-13.1407669,8.1847989],[-13.1406838,8.1849051],[-13.1406274,8.1850299],[-13.1405631,8.1851387],[-13.1404719,8.1852821],[-13.1403968,8.1853909],[-13.1402493,8.1856537],[-13.1401876,8.1858476],[-13.14015,8.1860546],[-13.1400776,8.1861582],[-13.1399596,8.1862405],[-13.1398121,8.1863281],[-13.1395009,8.1864343],[-13.1392998,8.1865803],[-13.1390718,8.186806],[-13.1387606,8.1870529],[-13.1384146,8.1874166],[-13.1380498,8.1878679],[-13.1378514,8.1882396],[-13.1376502,8.1884599],[-13.1375349,8.1885529],[-13.1372398,8.1886591],[-13.1364325,8.1888874],[-13.1358746,8.1890334],[-13.1354803,8.1891024],[-13.1351343,8.1890971],[-13.1349707,8.1890918],[-13.1347937,8.189125],[-13.134606,8.1891635],[-13.1344383,8.1893082],[-13.1342921,8.1895909],[-13.1341767,8.1899068],[-13.1341311,8.190406],[-13.1340856,8.1908069],[-13.1339756,8.1910405],[-13.1337932,8.1912768],[-13.1337342,8.1913591],[-13.1337261,8.1914201],[-13.1337288,8.1915422],[-13.1337288,8.1917413],[-13.1337878,8.191959],[-13.1338173,8.1921051],[-13.1337959,8.192198],[-13.1336752,8.1923626],[-13.1335519,8.192498],[-13.1334875,8.1925723],[-13.1333694,8.1926732],[-13.13312,8.1927635],[-13.1328921,8.1928776],[-13.1326747,8.1930555],[-13.1324151,8.1933316],[-13.132006,8.1936639],[-13.131685,8.1939157],[-13.1313363,8.1941838],[-13.1310842,8.194351],[-13.130977,8.1944679],[-13.1308964,8.194651],[-13.1309287,8.1949935],[-13.1309634,8.1952962],[-13.1309259,8.1954448],[-13.130604,8.1956227],[-13.1303224,8.1957289],[-13.1300408,8.1958404],[-13.1296948,8.1959227],[-13.1295741,8.1959944],[-13.1295231,8.1960661],[-13.1296116,8.1960913],[-13.1297672,8.196074],[-13.1298959,8.1960541],[-13.1300434,8.1960209],[-13.1301387,8.1960103],[-13.1303827,8.1959957],[-13.1305678,8.1960236],[-13.1306107,8.1961192],[-13.1306577,8.1962413],[-13.1306268,8.1963037],[-13.130537,8.1963886],[-13.1304297,8.1965121],[-13.1302768,8.1966554],[-13.130215,8.1966885],[-13.1301427,8.1966899],[-13.1300247,8.196674],[-13.1299523,8.196666],[-13.1299037,8.1966556],[-13.1298664,8.1966475],[-13.1298243,8.196617],[-13.1297988,8.1965838],[-13.1298168,8.1965506],[-13.1300086,8.1965413],[-13.1300784,8.1965002],[-13.1300864,8.1964377],[-13.1300461,8.1963634],[-13.1298208,8.1963501],[-13.1296304,8.1963369],[-13.1293729,8.1963873],[-13.1287688,8.1967297],[-13.1283966,8.196905],[-13.1280372,8.1970165],[-13.1268543,8.1971519],[-13.1255159,8.1971864],[-13.1240272,8.1970802],[-13.1233273,8.1969608],[-13.122949,8.1968758],[-13.1225923,8.1967404],[-13.1219056,8.196536],[-13.1211745,8.196369],[-13.1207925,8.1966607],[-13.1207711,8.1967351],[-13.1207787,8.1969289],[-13.1200254,8.1975899],[-13.1191349,8.198105],[-13.1180835,8.198535],[-13.1179816,8.19862],[-13.1179226,8.1987368],[-13.1179628,8.1994031],[-13.1177992,8.1995385],[-13.117429,8.1997031],[-13.1168979,8.1997828],[-13.1162167,8.1997403],[-13.1155542,8.1996713],[-13.1150821,8.1995253],[-13.114935,8.1994432],[-13.114838,8.199366],[-13.1148333,8.1993633],[-13.1147589,8.1993523],[-13.1146543,8.1993885],[-13.1145511,8.1994669],[-13.1145617,8.1996421],[-13.1145483,8.1997615],[-13.114441,8.1998412],[-13.1143311,8.1998916],[-13.1141862,8.1998571],[-13.1141353,8.1998651],[-13.1141111,8.1999076],[-13.1141031,8.1999819],[-13.1140682,8.2000668],[-13.1139502,8.2001598],[-13.1138644,8.2002022],[-13.1138268,8.2002155],[-13.1137008,8.2002102],[-13.1136283,8.2001757],[-13.1135961,8.2001571],[-13.1135479,8.200181],[-13.1135237,8.2002368],[-13.1134433,8.2003058],[-13.1133387,8.2003589],[-13.1128424,8.2006084],[-13.1122711,8.200935],[-13.1120163,8.2010358],[-13.1118286,8.2011288],[-13.1117106,8.2012588],[-13.1116033,8.2015137],[-13.1114155,8.2016756],[-13.1111607,8.2017102],[-13.110694,8.2017022],[-13.1104231,8.2016863],[-13.1102246,8.2017394],[-13.1098196,8.2018695],[-13.1096479,8.2018748],[-13.1094709,8.2018376],[-13.1088835,8.2017632],[-13.1084141,8.2017155],[-13.1081137,8.2016517],[-13.1078053,8.2015801],[-13.1076416,8.2014952],[-13.107419,8.2014792],[-13.1073707,8.2015004],[-13.1070435,8.2018084],[-13.1069738,8.2021535],[-13.1069979,8.2025597],[-13.1069818,8.2027508],[-13.1069148,8.2028836],[-13.1067351,8.2030482],[-13.1066948,8.2031093],[-13.1066734,8.203149],[-13.1067029,8.2032154],[-13.1067941,8.2032393],[-13.1068558,8.2032765],[-13.1069362,8.2037012],[-13.1070462,8.2038738],[-13.1070569,8.2040012],[-13.1069335,8.2041818],[-13.1067619,8.2043039],[-13.1065848,8.2043649],[-13.1064186,8.2043941],[-13.1062764,8.2044817],[-13.1062335,8.2046092],[-13.1062174,8.2047314],[-13.1059639,8.2051745],[-13.105831,8.2052967],[-13.1054991,8.2056011],[-13.1051177,8.2058516],[-13.1043506,8.2062286],[-13.1037363,8.206494],[-13.1033662,8.2067701],[-13.1030417,8.2070834],[-13.1029183,8.2072135],[-13.1026769,8.2074365],[-13.1023687,8.2079605],[-13.1020197,8.2083656],[-13.1018776,8.2085408],[-13.1018293,8.2087107],[-13.1019366,8.2088913],[-13.102044,8.2093347],[-13.1020385,8.2096213],[-13.101958,8.2098204],[-13.1018373,8.2103009],[-13.1016603,8.2105876],[-13.1014216,8.2109938],[-13.1012499,8.2113681],[-13.1012499,8.211469],[-13.1012633,8.2115619],[-13.1012258,8.2116548],[-13.101148,8.2117451],[-13.1010649,8.2118035],[-13.1009924,8.2118592],[-13.1008248,8.2120981],[-13.1006312,8.2124169],[-13.1005177,8.2127273],[-13.1004748,8.2128839],[-13.1001127,8.2130671],[-13.099823,8.2132158],[-13.0991444,8.2135768],[-13.0986589,8.2137361],[-13.098458,8.2137618],[-13.0979744,8.2137885],[-13.0967225,8.2138291],[-13.0961001,8.2137467],[-13.095751,8.21368],[-13.0955341,8.2136458],[-13.095477,8.2136569],[-13.0953679,8.2136963],[-13.0948073,8.2139459],[-13.0947107,8.2139697],[-13.094333,8.2139488],[-13.0940815,8.2141213],[-13.0939902,8.214341],[-13.0933428,8.2145856],[-13.0931228,8.214575],[-13.0918459,8.2145867],[-13.0918179,8.214587],[-13.091786,8.2145873],[-13.0917539,8.2145876],[-13.0916637,8.2145883],[-13.0913955,8.2145776],[-13.0912077,8.2145378],[-13.0911782,8.2145591],[-13.0911836,8.214652],[-13.091315,8.2149679],[-13.0913231,8.2154245],[-13.0912695,8.2160856],[-13.0912641,8.2161811],[-13.0913232,8.2164095],[-13.09135,8.2165289],[-13.0913259,8.2166351],[-13.0913017,8.2167015],[-13.0912666,8.2167521],[-13.0912252,8.2168117],[-13.0911085,8.216884],[-13.0909677,8.2168859],[-13.090886,8.216882],[-13.0907894,8.2168767],[-13.0906794,8.2168381],[-13.090564,8.2167571],[-13.0904971,8.216647],[-13.0904461,8.216562],[-13.0903857,8.2164917],[-13.0903147,8.216428],[-13.0902543,8.2163855],[-13.0901886,8.2163616],[-13.0901055,8.2163364],[-13.0897219,8.2163058],[-13.0895878,8.2163111],[-13.0894255,8.2163443],[-13.089286,8.2163788],[-13.089109,8.2164107],[-13.088948,8.2164439],[-13.0885604,8.2165182],[-13.0882734,8.2164996],[-13.0881259,8.2164412],[-13.0879757,8.2163483],[-13.0878228,8.2162634],[-13.0877071,8.2162403],[-13.087635,8.2162527],[-13.0874581,8.2163253],[-13.0873239,8.2163749],[-13.0872944,8.2164068],[-13.087289,8.2164598],[-13.0873266,8.2164943],[-13.0874473,8.2165634],[-13.0875465,8.2166776],[-13.0875573,8.2167704],[-13.0875938,8.217022],[-13.0875303,8.2171314],[-13.0874552,8.217191],[-13.0872879,8.2173235],[-13.0871565,8.2174274],[-13.0870963,8.2174399],[-13.0866955,8.2175219],[-13.0860104,8.2175261],[-13.0858567,8.2175748],[-13.085786,8.2176411],[-13.085732,8.2178631],[-13.0857012,8.2180181],[-13.0856422,8.2180871],[-13.0855671,8.2181349],[-13.0853956,8.2182166],[-13.0850977,8.2183526],[-13.0849314,8.2187933],[-13.0848482,8.2188649],[-13.0843118,8.2188676],[-13.0835476,8.2188084],[-13.0830492,8.2186769],[-13.0828748,8.2187016],[-13.0828151,8.218857],[-13.0828001,8.2189523],[-13.0828661,8.21921],[-13.0830056,8.2193959],[-13.0831021,8.2195578],[-13.0832309,8.2197728],[-13.083263,8.2198684],[-13.0832443,8.2199534],[-13.0831558,8.2201206],[-13.083019,8.2202799],[-13.0830029,8.2203303],[-13.0830056,8.2203967],[-13.0830324,8.2204737],[-13.0830672,8.2206568],[-13.0830377,8.220848],[-13.0831397,8.2213656],[-13.0831987,8.2218116],[-13.0831128,8.2224593],[-13.0829948,8.2228549],[-13.0829331,8.2232717],[-13.0828956,8.2236327],[-13.0828688,8.2241026],[-13.0828044,8.2245326],[-13.0826464,8.2252163],[-13.0823618,8.2259369],[-13.082276,8.2263457],[-13.082017,8.2266475],[-13.0818989,8.226733],[-13.0815625,8.2269669],[-13.0813341,8.2271194],[-13.0810422,8.2273014],[-13.0807817,8.2275016],[-13.0802875,8.2276825],[-13.0800882,8.2278633],[-13.0797643,8.2281551],[-13.0796106,8.2283894],[-13.0796072,8.2285809],[-13.0796501,8.2286101],[-13.0796903,8.2286234],[-13.0797064,8.2286711],[-13.0796742,8.2290799],[-13.0796447,8.2293135],[-13.0796823,8.2294914],[-13.0796635,8.2295843],[-13.0796474,8.2296401],[-13.0796555,8.2296719],[-13.0797333,8.2297781],[-13.0798164,8.229863],[-13.0797708,8.2299294],[-13.0796903,8.2299905],[-13.0796501,8.2300675],[-13.0796313,8.230163],[-13.0796447,8.2302533],[-13.0796072,8.2303488],[-13.0795267,8.2304099],[-13.0794838,8.2304683],[-13.0794597,8.2305532],[-13.0794168,8.2306886],[-13.0792505,8.2308399],[-13.0791163,8.230893],[-13.0790225,8.2309063],[-13.0788642,8.2310151],[-13.0787382,8.2311638],[-13.0786872,8.2312116],[-13.0784163,8.2312753],[-13.077955,8.2313496],[-13.0777189,8.2314001],[-13.0775097,8.2314664],[-13.0774346,8.2315062],[-13.0773219,8.2315699],[-13.0772227,8.2316416],[-13.0771047,8.2317159],[-13.0769625,8.231777],[-13.076697,8.2318513],[-13.0764905,8.2319549],[-13.0763376,8.2320425],[-13.0762357,8.232069],[-13.075956,8.2320064],[-13.075769,8.2320079],[-13.0756053,8.2320212],[-13.0754578,8.2320186],[-13.0753532,8.2320929],[-13.0753344,8.2323053],[-13.0753183,8.2325309],[-13.0753452,8.2327592],[-13.0754203,8.2328654],[-13.0754149,8.2330034],[-13.0753693,8.2330777],[-13.0753022,8.2331414],[-13.0752298,8.2332317],[-13.0751038,8.2332423],[-13.0750635,8.2331149],[-13.0750662,8.2329742],[-13.075034,8.2328866],[-13.0750045,8.2328043],[-13.0749857,8.2327552],[-13.0749644,8.2327633],[-13.0749603,8.2327764],[-13.0749871,8.2329317],[-13.0749857,8.2330008],[-13.0749455,8.233014],[-13.0748892,8.2329981],[-13.0747122,8.232953],[-13.0744252,8.2329291],[-13.0741462,8.2329344],[-13.0738512,8.232937],[-13.0737144,8.2329716],[-13.0735883,8.2330512],[-13.0734596,8.2331255],[-13.0732825,8.2332476],[-13.0730787,8.2334388],[-13.0729607,8.2336644],[-13.072663,8.2339431],[-13.072071,8.2343489],[-13.0717456,8.2345165],[-13.071293,8.2347319],[-13.0708498,8.2349412],[-13.070485,8.2351908],[-13.06997,8.2354297],[-13.0695784,8.2355359],[-13.0680174,8.2359287],[-13.0672342,8.2361623],[-13.0666434,8.2364281],[-13.0664456,8.2365021],[-13.0662203,8.2365977],[-13.0658984,8.2367782],[-13.065598,8.2369162],[-13.0652064,8.2370596],[-13.0648041,8.2372613],[-13.064096,8.2376436],[-13.0638546,8.2378135],[-13.0637151,8.2378612],[-13.0635595,8.2379249],[-13.0633986,8.2379409],[-13.0631089,8.2380205],[-13.0629104,8.2380736],[-13.0627656,8.238201],[-13.0626154,8.2383656],[-13.0624276,8.2384877],[-13.0622708,8.2385448],[-13.0620866,8.2385863],[-13.0603919,8.2386597],[-13.058403,8.2386788],[-13.0579551,8.2386841],[-13.0569237,8.2386496],[-13.0552072,8.2384745],[-13.0546613,8.2384373],[-13.0542013,8.2384267],[-13.054094,8.2384505],[-13.0540404,8.2384751],[-13.0538392,8.2385594],[-13.0537306,8.2385886],[-13.053327,8.2385993],[-13.0531714,8.2386232],[-13.0530373,8.2387347],[-13.0529353,8.2388461],[-13.0527745,8.2389285],[-13.0526403,8.2389708],[-13.0522192,8.2390053],[-13.0518651,8.2390106],[-13.051849,8.2390823],[-13.0518919,8.2391487],[-13.0529112,8.2390717],[-13.0531178,8.2391302],[-13.0532197,8.2392417],[-13.0532734,8.2394726],[-13.0532062,8.2395814],[-13.0521789,8.2397672],[-13.0517444,8.2398044],[-13.0512214,8.2398097],[-13.0507144,8.2398654],[-13.0498508,8.2400167],[-13.0494754,8.2400646],[-13.0491481,8.2400088],[-13.0485526,8.2398362],[-13.0478124,8.2395522],[-13.0471907,8.239416],[-13.0468135,8.2393666],[-13.046701,8.2393789],[-13.046442,8.2393779],[-13.045666,8.2393739],[-13.0454144,8.2393451],[-13.0451247,8.239215],[-13.0449156,8.239024],[-13.0447064,8.2389285],[-13.0443416,8.2389497],[-13.0440384,8.239016],[-13.0437917,8.2390717],[-13.0435073,8.2391142],[-13.0431989,8.239085],[-13.0428073,8.2390982],[-13.0424023,8.2390558],[-13.0420321,8.2390027],[-13.041603,8.2389098],[-13.041324,8.2388063],[-13.0410853,8.2387678],[-13.0408815,8.2387518],[-13.04075,8.2387386],[-13.0406266,8.2387253],[-13.0405462,8.2387133],[-13.0404228,8.2386895],[-13.0403075,8.2386682],[-13.0401599,8.2386364],[-13.0399963,8.2385647],[-13.0397469,8.2384373],[-13.039476,8.2382913],[-13.0387223,8.2378188],[-13.038277,8.2376515],[-13.0379069,8.2376117],[-13.0373758,8.2376276],[-13.0370271,8.2376728],[-13.0366999,8.2377471],[-13.0363646,8.2377975],[-13.0360213,8.2377444],[-13.0356967,8.2375958],[-13.0348009,8.2371286],[-13.0342859,8.2368366],[-13.0340124,8.2367677],[-13.0336369,8.2368579],[-13.0332345,8.236964],[-13.0327034,8.237049],[-13.0321723,8.2371604],[-13.0315661,8.2372985],[-13.0309037,8.2375241],[-13.0297021,8.2377975],[-13.028986,8.2380099],[-13.028479,8.2382196],[-13.0279372,8.2384134],[-13.0271191,8.238854],[-13.026454,8.239085],[-13.0260141,8.2392628],[-13.0256466,8.2394141],[-13.0251745,8.2396398],[-13.0247454,8.2397645],[-13.024335,8.239807],[-13.0233426,8.2397114],[-13.0221839,8.239677],[-13.0216313,8.2397937],[-13.0207972,8.2400884],[-13.0190967,8.2405265],[-13.0187265,8.2405238],[-13.0184073,8.2404999],[-13.0182008,8.2403751],[-13.0178409,8.2400092],[-13.0174202,8.2395815],[-13.0168945,8.2386577],[-13.0162991,8.2376224],[-13.0158619,8.2372349],[-13.0153763,8.2369747],[-13.012265,8.2358704],[-13.0084938,8.2348883],[-13.0062783,8.2342512],[-13.005286,8.2339857],[-13.0046637,8.2339963],[-13.0041218,8.234145],[-13.0033119,8.234575],[-13.0028021,8.2349891],[-13.0015576,8.2363111],[-13.0003935,8.2374127],[-12.9998947,8.2376038],[-12.9990471,8.2377445],[-12.9981914,8.2378267],[-12.9974511,8.2378885],[-12.9966599,8.2379082],[-12.9959417,8.2379261],[-12.994465,8.237963],[-12.9931033,8.2377605],[-12.9925347,8.2377127],[-12.9919393,8.2377206],[-12.9913331,8.2378374],[-12.9907859,8.237872],[-12.9903192,8.2378321],[-12.988534,8.236962],[-12.9869588,8.2393701],[-12.9839353,8.2439921],[-12.9825517,8.2461072],[-12.9792553,8.2545692],[-12.9787378,8.2558972],[-12.9750081,8.2638283],[-12.9718056,8.2657465],[-12.971611,8.2657177],[-12.966749,8.2649959],[-12.9646,8.2622437],[-12.9651899,8.2567808],[-12.9648528,8.2543204],[-12.9614817,8.2520268],[-12.9568654,8.2500952],[-12.9552031,8.2493995],[-12.9508207,8.2499834],[-12.9492616,8.2529442],[-12.9493037,8.2572812],[-12.9491868,8.2577444],[-12.9486295,8.2599501],[-12.9443314,8.2634113],[-12.9405389,8.2653712],[-12.9385163,8.2654963],[-12.935988,8.2645372],[-12.9351062,8.2633576],[-12.9340326,8.2638523],[-12.9334233,8.2641374],[-12.9322455,8.2656591],[-12.9326381,8.2668246],[-12.9341757,8.2668246],[-12.9338159,8.2675369],[-12.9331288,8.2685405],[-12.9324909,8.2686377],[-12.931035,8.2697546],[-12.9298082,8.2700136],[-12.9295792,8.270564],[-12.9298736,8.2716],[-12.9289903,8.2713734],[-12.9279761,8.2724418],[-12.9281233,8.2731541],[-12.9276162,8.2737854],[-12.9279925,8.2744329],[-12.9277962,8.2751613],[-12.9281397,8.2761811],[-12.9280742,8.2766182],[-12.9274036,8.2765211],[-12.9271255,8.2768286],[-12.928107,8.2775247],[-12.9278616,8.2778646],[-12.9272236,8.2775409],[-12.9269946,8.277897],[-12.9273218,8.2787064],[-12.9273218,8.2790949],[-12.9268175,8.2790993],[-12.9251427,8.2814912],[-12.9216028,8.2850884],[-12.9181009,8.2907007],[-12.9159503,8.2945614],[-12.9138466,8.2958429],[-12.9136851,8.3012761],[-12.915946,8.3023681],[-12.9161341,8.3081126],[-12.9170762,8.3103497],[-12.9183143,8.3120276],[-12.9183681,8.3139318],[-12.9195928,8.3147441],[-12.9198888,8.3185126],[-12.9211404,8.321775],[-12.9213983,8.3257433],[-12.9247479,8.3279089],[-12.9259378,8.3294844],[-12.9259283,8.3324692],[-12.926968,8.336421],[-12.9309868,8.3416553],[-12.9313869,8.351287],[-12.9401882,8.3599949],[-12.9359648,8.3655504],[-12.9284531,8.3754311],[-12.9301603,8.3765676],[-12.9427219,8.38493],[-12.9623248,8.3845342],[-12.9645918,8.3906028],[-12.9716595,8.3888878],[-12.9811276,8.3807083],[-12.9865268,8.3811321],[-12.9895289,8.3813679],[-12.9943296,8.3861173],[-13.000591,8.3817579],[-13.0012895,8.3812625],[-13.0022245,8.3814315],[-13.0037154,8.3806009],[-13.005655,8.3806296],[-13.0069722,8.3786104],[-13.0095628,8.3780955],[-13.0103586,8.3775845],[-13.0110593,8.377274],[-13.0112965,8.3769058],[-13.011822,8.3765015],[-13.0125591,8.3760141],[-13.0127264,8.3760103],[-13.0131941,8.3759996],[-13.0138692,8.3758985],[-13.0149821,8.3757722],[-13.0154821,8.3758624],[-13.015712,8.3762668],[-13.0156463,8.3767542],[-13.0151391,8.3772632],[-13.0151464,8.3778048],[-13.0155806,8.3781297],[-13.0161097,8.3781802],[-13.0167046,8.3780358],[-13.017106,8.3776279],[-13.0175074,8.3771694],[-13.0179818,8.3771441],[-13.0185036,8.3775917],[-13.0186496,8.3781513],[-13.0183248,8.3788048],[-13.0180438,8.3792236],[-13.0181533,8.3797832],[-13.0186423,8.3803572],[-13.0190875,8.3808012],[-13.0195692,8.3814836],[-13.0201311,8.3820467],[-13.0208099,8.3825883],[-13.0216163,8.3828771],[-13.0222841,8.3828121],[-13.0228096,8.3825774],[-13.0229702,8.381924],[-13.0229629,8.3811081],[-13.0231928,8.3801803],[-13.0235066,8.3798084],[-13.0239044,8.3790033],[-13.0238022,8.3777975],[-13.0239117,8.3767542],[-13.0242985,8.3757253],[-13.0248714,8.3747577],[-13.025375,8.3740068],[-13.0261632,8.3739129],[-13.0274258,8.3738335],[-13.0289402,8.3736674],[-13.0307648,8.3734327],[-13.0322537,8.3734436],[-13.0331623,8.3741006],[-13.033987,8.3751729],[-13.0345891,8.3756169],[-13.0354868,8.3753678],[-13.0360342,8.3743858],[-13.0359649,8.3734725],[-13.0359941,8.3723569],[-13.0366655,8.371216],[-13.0373078,8.3709525],[-13.0383259,8.3712016],[-13.0395155,8.3721475],[-13.0406285,8.3744833],[-13.0422898,8.3768299],[-13.0430997,8.3764831],[-13.0434967,8.3766105],[-13.0446768,8.37643],[-13.0458033,8.3763663],[-13.0466187,8.3762497],[-13.0475843,8.3761541],[-13.0482924,8.3760905],[-13.0493546,8.3761648],[-13.0524874,8.3756659],[-13.0592895,8.3752518],[-13.0607808,8.3751775],[-13.0623472,8.3750289],[-13.0633557,8.3749652],[-13.0641389,8.3749334],[-13.0646539,8.3749547],[-13.0655658,8.3750502],[-13.0688596,8.3755014],[-13.0695248,8.3758569],[-13.0701309,8.3762762],[-13.0711824,8.3768335],[-13.0716491,8.3771731],[-13.0719012,8.3774013],[-13.0720729,8.3776242],[-13.0722821,8.3779586],[-13.0728346,8.3783726],[-13.0739075,8.3789351],[-13.0743957,8.3791686],[-13.0747873,8.3792535],[-13.0753827,8.3793968],[-13.076579,8.3801717],[-13.0776089,8.3812702],[-13.0786926,8.3825333],[-13.0789286,8.3826766],[-13.0792129,8.3827508],[-13.0801607,8.3835096],[-13.0803073,8.3846826],[-13.0805595,8.385638],[-13.0806962,8.3866117],[-13.0808921,8.3871266],[-13.0811977,8.3878032],[-13.0813614,8.3880447],[-13.0816242,8.3884693],[-13.0821215,8.3898726],[-13.0822321,8.3901692],[-13.0822787,8.3902842],[-13.0823243,8.3904593],[-13.0824503,8.3906902],[-13.0825174,8.3908574],[-13.0825308,8.391059],[-13.0826005,8.3913934],[-13.0826917,8.3916587],[-13.0827321,8.3917517],[-13.0827988,8.3919301],[-13.0828503,8.3920251],[-13.0829989,8.3922994],[-13.0831438,8.392567],[-13.0832346,8.3927347],[-13.0836432,8.3932128],[-13.0844843,8.3941973],[-13.0847329,8.394636],[-13.0848831,8.3949571],[-13.0849153,8.3950845],[-13.084926,8.3952463],[-13.0849475,8.3954639],[-13.0850869,8.3957849],[-13.0857495,8.3972204],[-13.0859292,8.3976052],[-13.0861438,8.3979316],[-13.0864522,8.3982446],[-13.086632,8.3983562],[-13.0867044,8.3984384],[-13.0867688,8.3985021],[-13.0868305,8.3985844],[-13.0869029,8.3987064],[-13.0869834,8.3988736],[-13.0870504,8.3990806],[-13.0870826,8.3992159],[-13.0872247,8.3993989],[-13.087778,8.4002638],[-13.0884076,8.4011715],[-13.0886436,8.4015535],[-13.0893444,8.4029365],[-13.0898774,8.4046845],[-13.0904138,8.4061067],[-13.0911434,8.4083143],[-13.0917549,8.4102672],[-13.0925918,8.4123581],[-13.0932891,8.41343],[-13.09389,8.4140668],[-13.0943513,8.4144384],[-13.0948679,8.4144866],[-13.0954564,8.414311],[-13.0959239,8.4139279],[-13.0964321,8.4134027],[-13.0973188,8.4124082],[-13.0975164,8.4121353],[-13.097806,8.4118592],[-13.0981387,8.4116788],[-13.0985355,8.4115621],[-13.0992391,8.4115871],[-13.0998552,8.4115834],[-13.100338,8.4113922],[-13.1008209,8.4111482],[-13.1015504,8.410904],[-13.1020968,8.4106932],[-13.1023229,8.4106494],[-13.1026558,8.4106428],[-13.1041016,8.4104584],[-13.1046189,8.4103735],[-13.1051916,8.4102964],[-13.1060501,8.4102183],[-13.1063201,8.4099126],[-13.106432,8.4093279],[-13.1077529,8.4093313],[-13.1079219,8.4096856],[-13.1084302,8.4102331],[-13.1090514,8.4106465],[-13.1102826,8.4112276],[-13.1147039,8.4121776],[-13.1160022,8.412666],[-13.1163932,8.4131382],[-13.1173421,8.4137752],[-13.1176792,8.4138441],[-13.1181822,8.4148459],[-13.1190169,8.4165079],[-13.1188238,8.4174631],[-13.1187379,8.4182485],[-13.1188131,8.418498],[-13.1191135,8.4192779],[-13.1193817,8.4201058],[-13.1199342,8.4209548],[-13.1205028,8.4214908],[-13.1235015,8.422897],[-13.1251752,8.4236028],[-13.1261301,8.4239106],[-13.1270635,8.4242343],[-13.1275732,8.4243352],[-13.1277395,8.424383],[-13.1280399,8.4244042],[-13.1286728,8.4244041],[-13.1289948,8.4244679],[-13.1291557,8.4245899],[-13.1293595,8.4247702],[-13.1296223,8.4251045],[-13.1302286,8.4261978],[-13.1303305,8.4263517],[-13.1305451,8.426548],[-13.1308186,8.4268663],[-13.131044,8.4269991],[-13.1311298,8.4269672],[-13.1312531,8.4269406],[-13.1313712,8.4267974],[-13.1315107,8.4266064],[-13.1316769,8.4263781],[-13.1318326,8.4261076],[-13.1319023,8.4259378],[-13.1320792,8.4253274],[-13.1325674,8.4248339],[-13.1334043,8.4244465],[-13.1341875,8.4242555],[-13.134665,8.4242025],[-13.134783,8.4242238],[-13.1350834,8.4243246],[-13.1354857,8.4245898],[-13.1370199,8.4251152],[-13.1376904,8.4254229],[-13.138597,8.4257042],[-13.1394661,8.4257838],[-13.1396807,8.425821],[-13.1399649,8.425959],[-13.1401743,8.4262721],[-13.140437,8.4265426],[-13.1405766,8.4266541],[-13.1410378,8.4267868],[-13.1414885,8.426824],[-13.1418748,8.4268664],[-13.1422931,8.426999],[-13.1424166,8.4271052],[-13.1424686,8.4272512],[-13.1425131,8.4273758],[-13.1424821,8.4277003],[-13.142379,8.4279171],[-13.1421576,8.4282018],[-13.1420464,8.4284106],[-13.1419981,8.4286228],[-13.142379,8.4294772],[-13.1425131,8.4296629],[-13.1427276,8.4298539],[-13.1432481,8.4301984],[-13.143485,8.4303551],[-13.1440526,8.430756],[-13.1450772,8.4314511],[-13.1459785,8.4319499],[-13.1468582,8.4324807],[-13.1472874,8.4331173],[-13.1479526,8.433977],[-13.1486231,8.4348367],[-13.14906,8.4353991],[-13.1494385,8.436195],[-13.1497014,8.4368742],[-13.1498809,8.4370922],[-13.1502432,8.4375322],[-13.1503953,8.4378233],[-13.1505651,8.4381479],[-13.1509781,8.4389119],[-13.1512727,8.4393823],[-13.1514198,8.4396172],[-13.1516853,8.4401777],[-13.1520135,8.4407904],[-13.1524427,8.4413794],[-13.1531427,8.442414],[-13.1532636,8.4428188],[-13.1533037,8.4429526],[-13.1533841,8.44321],[-13.1534217,8.4435522],[-13.1537301,8.4448365],[-13.1538347,8.4449585],[-13.1539768,8.4450937],[-13.1542209,8.4452794],[-13.1543605,8.4455421],[-13.1544517,8.4457703],[-13.1545697,8.4460276],[-13.1547868,8.4466325],[-13.1549907,8.4470571],[-13.1552616,8.4477176],[-13.1557792,8.4487047],[-13.1561923,8.449466],[-13.1565215,8.449874],[-13.157233,8.4507554],[-13.1580001,8.4517584],[-13.1583086,8.4521669],[-13.1584632,8.4523455],[-13.1584852,8.4523733],[-13.1584999,8.4523989],[-13.1585191,8.4524321],[-13.1586772,8.4527063],[-13.158779,8.452883],[-13.1589098,8.45311],[-13.1590086,8.4532812],[-13.1597328,8.4539179],[-13.1598465,8.4539464],[-13.1599966,8.4539839],[-13.1604543,8.4540983],[-13.1606936,8.4541582],[-13.1613314,8.4543636],[-13.1619054,8.4546395],[-13.1627422,8.4550587],[-13.1636717,8.4553492],[-13.1651402,8.4556319],[-13.1660736,8.4556106],[-13.1662613,8.4556],[-13.1664544,8.4557115],[-13.1666046,8.4559024],[-13.1668112,8.4563799],[-13.1670727,8.4567012],[-13.16742,8.457091],[-13.1676775,8.4573987],[-13.1678323,8.4576456],[-13.1679999,8.4580025],[-13.1681389,8.4584334],[-13.1684634,8.4590728],[-13.1686029,8.4591471],[-13.1687745,8.459187],[-13.1688765,8.45924],[-13.1689301,8.4593089],[-13.1689972,8.4595636],[-13.1690295,8.4598077],[-13.1690548,8.4602083],[-13.1690992,8.4604033],[-13.1691636,8.4605545],[-13.1692078,8.4606712],[-13.169252,8.4608569],[-13.1692627,8.4611978],[-13.1692936,8.4614672],[-13.1692949,8.4616012],[-13.1693056,8.4617551],[-13.1693097,8.4617842],[-13.1692963,8.461816],[-13.1692655,8.4618372],[-13.1692521,8.4618744],[-13.1692561,8.461889],[-13.1692655,8.4619473],[-13.1692789,8.4619858],[-13.1693017,8.4620468],[-13.1693258,8.4620614],[-13.1693646,8.4620482],[-13.1694276,8.4620324],[-13.1694585,8.4620536],[-13.169484,8.4621995],[-13.1695256,8.4622724],[-13.169606,8.4623838],[-13.1697415,8.462547],[-13.1698287,8.4626611],[-13.1699239,8.4627791],[-13.1700231,8.4629012],[-13.1700982,8.4629801],[-13.1701398,8.4630166],[-13.1702075,8.4630696],[-13.1703141,8.4631592],[-13.1703912,8.4632282],[-13.1704482,8.4633051],[-13.1704684,8.4633383],[-13.1704979,8.4633834],[-13.1705302,8.4634124],[-13.1706487,8.4634974],[-13.1706997,8.4635287],[-13.170805,8.4636268],[-13.1708589,8.4637214],[-13.1708922,8.4637727],[-13.1709109,8.4638231],[-13.170927,8.4638709],[-13.1709418,8.4639438],[-13.1709364,8.4640194],[-13.1709069,8.4641441],[-13.1708667,8.464225],[-13.1708238,8.4643643],[-13.1708224,8.4644492],[-13.170864,8.4645646],[-13.1709143,8.4646727],[-13.170923,8.4647125],[-13.1709284,8.4647576],[-13.1709324,8.4648273],[-13.1709251,8.4649048],[-13.1709043,8.4650315],[-13.1708927,8.4651281],[-13.1708987,8.4651943],[-13.1709042,8.4652737],[-13.1709049,8.4653559],[-13.1709056,8.4654215],[-13.1709069,8.465464],[-13.1709109,8.4655164],[-13.1709237,8.4655674],[-13.1709659,8.4656988],[-13.1709807,8.4657585],[-13.1709966,8.4658245],[-13.1710053,8.4658402],[-13.1710194,8.4658565],[-13.1710316,8.4658845],[-13.1710678,8.4659415],[-13.1710866,8.4659813],[-13.1711094,8.4660145],[-13.1711939,8.4661537],[-13.1712167,8.4662095],[-13.1712489,8.4662692],[-13.1712717,8.4663196],[-13.1713173,8.4663925],[-13.1714246,8.4665835],[-13.1714621,8.4666339],[-13.1715184,8.4667533],[-13.1715801,8.466886],[-13.1716177,8.4669629],[-13.1717445,8.4671076],[-13.1720227,8.4675836],[-13.1722513,8.4678139],[-13.1727577,8.4680516],[-13.1730366,8.4684194],[-13.1730674,8.4685029],[-13.1731077,8.468731],[-13.17316,8.4688465],[-13.1732418,8.4689313],[-13.1734336,8.4691396],[-13.17338,8.4692059],[-13.1733585,8.4692284],[-13.1733545,8.4692603],[-13.1733934,8.4693054],[-13.1734524,8.4693491],[-13.1734994,8.469377],[-13.1735436,8.4693518],[-13.1736098,8.4693238],[-13.1737756,8.4693611],[-13.1738615,8.4693757],[-13.1739513,8.4694234],[-13.1740358,8.4695004],[-13.1740707,8.4695561],[-13.1740975,8.4696091],[-13.1741752,8.4697193],[-13.1744019,8.4698625],[-13.1746057,8.469966],[-13.1749169,8.4700853],[-13.1755646,8.4703758],[-13.1758543,8.4705403],[-13.176101,8.4706663],[-13.1762298,8.4707539],[-13.1763826,8.4709422],[-13.1765194,8.4710895],[-13.1767769,8.4713375],[-13.1769111,8.4714383],[-13.1770332,8.4715153],[-13.1771136,8.4715816],[-13.1771753,8.471628],[-13.177202,8.4716652],[-13.1774153,8.471949],[-13.1776607,8.4721865],[-13.177937,8.4725473],[-13.1780443,8.4728603],[-13.1781274,8.4729931],[-13.1782776,8.4731044],[-13.1784117,8.4732185],[-13.178723,8.4732662],[-13.1789483,8.4733007],[-13.1791494,8.4733365],[-13.1793559,8.473444],[-13.1797609,8.4737491],[-13.1800666,8.4740966],[-13.1804567,8.4744017],[-13.1806713,8.4746055],[-13.180879,8.4748749],[-13.1809586,8.4751869],[-13.1811005,8.4758958],[-13.1811812,8.4760903],[-13.1813394,8.4763648],[-13.1815258,8.4766739],[-13.1816922,8.4768569],[-13.1817658,8.4769657],[-13.1818973,8.4772071],[-13.1819737,8.4774711],[-13.1819939,8.4775693],[-13.18203,8.4777149],[-13.1821529,8.4778169],[-13.182453,8.4779731],[-13.1829876,8.4781476],[-13.1834838,8.4781715],[-13.1836073,8.4782139],[-13.1836877,8.4782312],[-13.1838513,8.4782285],[-13.1839466,8.4781821],[-13.1839961,8.478137],[-13.1841248,8.4780097],[-13.1842892,8.4779292],[-13.1843797,8.4779194],[-13.1844772,8.4779457],[-13.1846862,8.4780461],[-13.1847901,8.4782935],[-13.1849992,8.4785588],[-13.1852593,8.4787603],[-13.1853292,8.4788692],[-13.18534,8.4791796],[-13.1852862,8.4794529],[-13.1852326,8.4797526],[-13.1851092,8.4802779],[-13.1851307,8.4804822],[-13.1852095,8.4807097],[-13.1852931,8.4808204],[-13.1855557,8.4811573],[-13.1857966,8.4813498],[-13.1858546,8.4813971],[-13.1858975,8.4814145],[-13.185989,8.4814823],[-13.1863111,8.4816959],[-13.1866045,8.4819012],[-13.1870592,8.4822814],[-13.1873945,8.4823338],[-13.1875661,8.4823339],[-13.1877332,8.4822851],[-13.1881648,8.4819726],[-13.1885384,8.4817254],[-13.1888817,8.4814707],[-13.1892251,8.4811821],[-13.1894437,8.4810498],[-13.189594,8.4810313],[-13.189889,8.4810392],[-13.1902465,8.4809868],[-13.1905917,8.4809226],[-13.1908761,8.4809544],[-13.1910879,8.4810048],[-13.1912541,8.4810128],[-13.1914179,8.4810155],[-13.1915766,8.4809518],[-13.1917772,8.4809014],[-13.1918669,8.4809021],[-13.1919327,8.4809253],[-13.1924009,8.4811215],[-13.192754,8.4812429],[-13.1928783,8.4813271],[-13.1930056,8.4814438],[-13.1932202,8.4816547],[-13.1932941,8.4817622],[-13.1934402,8.4819664],[-13.1935904,8.4821111],[-13.1937432,8.4822649],[-13.1937916,8.4823259],[-13.1938573,8.4823657],[-13.1938976,8.4823922],[-13.1939364,8.482387],[-13.1940179,8.4830229],[-13.194084,8.4830184],[-13.1940156,8.4823671],[-13.194033,8.4823511],[-13.1940826,8.4823458],[-13.1941698,8.4823338],[-13.1944823,8.482253],[-13.1945279,8.4822436],[-13.194556,8.4822529],[-13.1945748,8.4822795],[-13.1945748,8.4823101],[-13.1946109,8.4823511],[-13.1946915,8.4823392],[-13.1947129,8.4823179],[-13.1947398,8.4823179],[-13.1947813,8.4823232],[-13.1948229,8.4822995],[-13.1948497,8.4821972],[-13.1948591,8.482168],[-13.1948927,8.4821387],[-13.1949114,8.4820898],[-13.1949611,8.4820579],[-13.1950602,8.4820115],[-13.1952802,8.481932],[-13.195405,8.4819094],[-13.195476,8.4818895],[-13.1955752,8.4818458],[-13.1956181,8.481798],[-13.1955887,8.4817369],[-13.1955619,8.4816826],[-13.1955485,8.4816401],[-13.1955604,8.4815658],[-13.1956101,8.4815275],[-13.1956343,8.4815008],[-13.1956303,8.4814584],[-13.1956115,8.481432],[-13.1955458,8.4813816],[-13.195472,8.4813616],[-13.1954331,8.4813178],[-13.195421,8.4812674],[-13.1954398,8.4812236],[-13.1955672,8.4811706],[-13.1957215,8.4811494],[-13.1958287,8.481103],[-13.195924,8.4810685],[-13.1961411,8.4810021],[-13.1962029,8.4809597],[-13.1963062,8.480896],[-13.1963906,8.4807939],[-13.1964955,8.4807541],[-13.1966212,8.4806998],[-13.1967098,8.48066],[-13.196734,8.480628],[-13.1967339,8.4805777],[-13.1967984,8.480514],[-13.1968681,8.4805087],[-13.1969404,8.480522],[-13.1970316,8.4805459],[-13.197438,8.4806679],[-13.1975801,8.4807382],[-13.19778,8.4808205],[-13.1979208,8.480912],[-13.1980509,8.4809558],[-13.1981595,8.4809783],[-13.1983138,8.4810631],[-13.1984291,8.4811334],[-13.1985029,8.4812276],[-13.1985552,8.4813019],[-13.1985901,8.4813443],[-13.1986236,8.4813722],[-13.1987926,8.481469],[-13.1989716,8.4815579],[-13.1993646,8.4817018],[-13.199596,8.4817309],[-13.1998151,8.4817147],[-13.2000361,8.4815877],[-13.2002378,8.4814482],[-13.2003187,8.4814068],[-13.2004072,8.4813802],[-13.2005736,8.4813496],[-13.2006568,8.481345],[-13.2007318,8.4813284],[-13.2008339,8.4812745],[-13.2009424,8.4811454],[-13.201189,8.4809437],[-13.2013058,8.4808862],[-13.2014386,8.4808456],[-13.2016195,8.4808483],[-13.2017362,8.4808841],[-13.2021949,8.4811388],[-13.2023613,8.4812236],[-13.2024833,8.4813005],[-13.2026094,8.4814372],[-13.2026549,8.4815023],[-13.2027735,8.4818068],[-13.2028199,8.481912],[-13.2028937,8.4820288],[-13.202966,8.4821283],[-13.2032518,8.4824479],[-13.2032758,8.4824852],[-13.203288,8.4825209],[-13.203253,8.4826271],[-13.2032263,8.4826774],[-13.2032129,8.4827649],[-13.2032021,8.4828458],[-13.2032062,8.4829254],[-13.2032384,8.4830302],[-13.2032611,8.4830952],[-13.2032947,8.483208],[-13.2033255,8.483395],[-13.2033281,8.4834959],[-13.2033335,8.483594],[-13.2033108,8.4838128],[-13.2033094,8.4840184],[-13.2033214,8.4841312],[-13.2033259,8.4841879],[-13.2033021,8.4843548],[-13.2032913,8.4844236],[-13.2032813,8.4844548],[-13.2032397,8.4844787],[-13.2031686,8.4844986],[-13.2031471,8.4845106],[-13.2031337,8.4845437],[-13.203115,8.4846339],[-13.2031083,8.4846657],[-13.2030974,8.4846791],[-13.2030747,8.4846962],[-13.2029782,8.4847347],[-13.2029433,8.4847519],[-13.202933,8.4847713],[-13.2028803,8.4849429],[-13.2028525,8.4852303],[-13.2028824,8.4853742],[-13.2026512,8.4854657],[-13.2026193,8.4854922],[-13.2026133,8.4855227],[-13.2026146,8.4855572],[-13.2026274,8.4855824],[-13.2026523,8.4855962],[-13.2026656,8.4856056],[-13.202669,8.4856155],[-13.2026589,8.4856228],[-13.2026388,8.4856394],[-13.2025979,8.4856719],[-13.2025409,8.4857143],[-13.202502,8.4857435],[-13.2025181,8.4857661],[-13.2025342,8.4857588],[-13.202569,8.4857369],[-13.2026455,8.4856871],[-13.2026998,8.4856533],[-13.2027474,8.4856361],[-13.2027776,8.4856334],[-13.2028125,8.4856313],[-13.2029499,8.4856062],[-13.2030778,8.4855998],[-13.2033246,8.4855522],[-13.203518,8.485515],[-13.2036145,8.4855073],[-13.2039022,8.4854616],[-13.2042066,8.4854271],[-13.2043005,8.4854311],[-13.2043984,8.4854894],[-13.2045218,8.4855889],[-13.2046224,8.4856804],[-13.2047779,8.4857096],[-13.2049013,8.4857706],[-13.2049965,8.4858542],[-13.2049952,8.4859298],[-13.2049952,8.4859669],[-13.2050032,8.4859762],[-13.2050126,8.4859855],[-13.2050475,8.4859842],[-13.2051293,8.4859921],[-13.2052259,8.4860042],[-13.2053023,8.486008],[-13.2053425,8.4859974],[-13.2053492,8.4859364],[-13.2053479,8.4859086],[-13.2053653,8.4858926],[-13.2054109,8.4858834],[-13.2055035,8.4858807],[-13.2056282,8.4858807],[-13.2057427,8.4858675],[-13.2058319,8.4858423],[-13.2058904,8.4858579],[-13.2059231,8.485902],[-13.2059219,8.4859564],[-13.2058562,8.486235],[-13.2058924,8.4864472],[-13.2059769,8.4866395],[-13.2060345,8.4867483],[-13.2060452,8.486808],[-13.2060318,8.4868849],[-13.2060063,8.4869167],[-13.2059996,8.4869406],[-13.206009,8.4869671],[-13.2060331,8.4869791],[-13.2061203,8.487003],[-13.2062115,8.4869963],[-13.2062839,8.4869937],[-13.2064007,8.4869844],[-13.2065241,8.4870242],[-13.20674,8.4870507],[-13.2068969,8.4871157],[-13.2069115,8.4871303],[-13.2068941,8.4871648],[-13.2068753,8.48719],[-13.2068486,8.4872019],[-13.2067252,8.4871329],[-13.2066689,8.4872178],[-13.206744,8.487255],[-13.2066769,8.4874088],[-13.2066367,8.4874619],[-13.2066099,8.4874871],[-13.206575,8.4874964],[-13.2065522,8.4874976],[-13.2065395,8.4875109],[-13.2065375,8.4875282],[-13.2065361,8.4875428],[-13.2065159,8.4876423],[-13.2064852,8.4876874],[-13.2064315,8.4877192],[-13.2063899,8.4877497],[-13.2063658,8.48782],[-13.2063283,8.4878466],[-13.2062371,8.4878678],[-13.2062115,8.4878731],[-13.2061928,8.4878784],[-13.2061794,8.487897],[-13.20617,8.4879407],[-13.2061553,8.4879779],[-13.2061405,8.4879938],[-13.2060788,8.4879858],[-13.206048,8.487946],[-13.2060224,8.4878983],[-13.2059635,8.4879036],[-13.2059298,8.4879248],[-13.2058964,8.4879315],[-13.2058656,8.4879381],[-13.2058011,8.4878996],[-13.2057904,8.4878519],[-13.2057704,8.4878174],[-13.2057449,8.4878015],[-13.205718,8.4877829],[-13.2057139,8.487771],[-13.2057194,8.4877444],[-13.2058133,8.4875282],[-13.2058106,8.487499],[-13.2057891,8.4874844],[-13.2057301,8.4874805],[-13.2056657,8.4874646],[-13.2056294,8.4874659],[-13.2055074,8.4874221],[-13.2054551,8.4873863],[-13.2053974,8.4873319],[-13.205368,8.487243],[-13.2053318,8.4872072],[-13.2052848,8.4871794],[-13.2052272,8.4871727],[-13.2051843,8.4871847],[-13.2051238,8.4871926],[-13.2050596,8.4872032],[-13.2049456,8.4872231],[-13.2047807,8.4872604],[-13.2046031,8.487305],[-13.2045002,8.4873744],[-13.2044279,8.4874646],[-13.2043407,8.4875733],[-13.2043153,8.487613],[-13.2042593,8.4876467],[-13.2041341,8.4877179],[-13.2041114,8.4876834],[-13.2040873,8.4876264],[-13.2040697,8.4876105],[-13.2040417,8.4876105],[-13.2039062,8.4876701],[-13.2037533,8.487767],[-13.203642,8.4878558],[-13.2035467,8.4879779],[-13.2035012,8.4881052],[-13.2034851,8.4882405],[-13.2034784,8.488336],[-13.2034663,8.4884182],[-13.2034622,8.4884917],[-13.2034583,8.4885389],[-13.2032021,8.4887722],[-13.2031519,8.4888209],[-13.2029223,8.4890293],[-13.2028786,8.4890718],[-13.2028373,8.489112],[-13.2028413,8.4891411],[-13.2029325,8.4892552],[-13.2029472,8.4892963],[-13.2029378,8.4893812],[-13.2028842,8.4896452],[-13.2028708,8.489685],[-13.202844,8.4897022],[-13.2028333,8.4897301],[-13.2028426,8.4897606],[-13.2028976,8.4899701],[-13.2029822,8.490193],[-13.2030935,8.4903681],[-13.2031307,8.490471],[-13.2031699,8.4905524],[-13.2032574,8.4906459],[-13.2033369,8.4906887],[-13.2033871,8.490719],[-13.2035386,8.4907411],[-13.2038499,8.4907766],[-13.2039777,8.4907603],[-13.2041392,8.4907177],[-13.2043065,8.4906646],[-13.2043973,8.4906358],[-13.2044724,8.4906166],[-13.2045711,8.4905913],[-13.2046564,8.4905695],[-13.2047959,8.4905695],[-13.2049428,8.4906241],[-13.2050247,8.490656],[-13.2051024,8.4906985],[-13.2052003,8.4907328],[-13.2053304,8.4907648],[-13.2053961,8.4907859],[-13.2055128,8.4908058],[-13.2056066,8.4908217],[-13.2057427,8.490856],[-13.2058078,8.4908868],[-13.2058816,8.4909277],[-13.2060019,8.491011],[-13.2064703,8.4914358],[-13.2066469,8.4915828],[-13.2066833,8.4916124],[-13.2068231,8.4917263],[-13.2069639,8.4918046],[-13.2070793,8.4918841],[-13.2076345,8.4923059],[-13.2081508,8.4926893],[-13.2085102,8.4929532],[-13.2099465,8.4940116],[-13.2100136,8.4940515],[-13.210086,8.4940674],[-13.2107593,8.4940488],[-13.2167803,8.4940011],[-13.2164575,8.493989],[-13.2189223,8.4939713],[-13.2188984,8.4922621],[-13.2177064,8.4922686],[-13.2171013,8.4922861],[-13.2169127,8.4922851],[-13.2167754,8.4922782],[-13.2166727,8.4922673],[-13.2167512,8.4921652],[-13.2169713,8.4919213],[-13.217095,8.4918203],[-13.2172589,8.4917491],[-13.2175577,8.4916331],[-13.2176096,8.491587],[-13.217666,8.4915472],[-13.2177236,8.4915247],[-13.2177598,8.4915247],[-13.2179074,8.4914703],[-13.2179623,8.4914531],[-13.218012,8.491457],[-13.2180656,8.4914677],[-13.2182248,8.4914836],[-13.2182502,8.4914817],[-13.218283,8.4914715],[-13.2183405,8.4914106],[-13.2183821,8.491396],[-13.2184839,8.4913973],[-13.2185927,8.4913642],[-13.2186771,8.4913204],[-13.218775,8.4912687],[-13.21883,8.4912369],[-13.2189427,8.4911944],[-13.2190755,8.4911374],[-13.2192887,8.4910618],[-13.2193851,8.4910338],[-13.2195179,8.4910167],[-13.2195984,8.4910087],[-13.219648,8.4910074],[-13.2197057,8.49101],[-13.2197607,8.49101],[-13.2198211,8.4910021],[-13.2199149,8.4909928],[-13.2199699,8.4909874],[-13.2200383,8.4909822],[-13.2201013,8.4909742],[-13.2202475,8.4909545],[-13.2203008,8.4909426],[-13.2203646,8.4909279],[-13.2206914,8.490823],[-13.2207961,8.4907673],[-13.2208791,8.4907289],[-13.220947,8.4906831],[-13.2209939,8.4906692],[-13.2210749,8.4906387],[-13.2211554,8.4906081],[-13.221222,8.4906013],[-13.2213499,8.4905949],[-13.2213955,8.4906121],[-13.2214546,8.4906453],[-13.2214974,8.4906505],[-13.221587,8.4906585],[-13.2218003,8.4906459],[-13.221928,8.490632],[-13.222117,8.4905985],[-13.2221922,8.4906147],[-13.2222566,8.4906652],[-13.2223129,8.4907434],[-13.2223424,8.4907541],[-13.2223907,8.490762],[-13.2226661,8.490789],[-13.2228712,8.4907554],[-13.2232409,8.4906254],[-13.2234675,8.4905643],[-13.2236525,8.490547],[-13.2237854,8.4905868],[-13.2238686,8.49062],[-13.2239531,8.490673],[-13.2240214,8.4907341],[-13.2240697,8.4907818],[-13.2241005,8.4908283],[-13.2241247,8.4908561],[-13.2241434,8.4908813],[-13.2241649,8.4908907],[-13.2244518,8.4909053],[-13.224527,8.4909012],[-13.2245619,8.4909013],[-13.2246012,8.4909116],[-13.2246596,8.4909411],[-13.2247188,8.4909822],[-13.2247925,8.4910034],[-13.2249816,8.491018],[-13.2250769,8.490994],[-13.2251586,8.4909782],[-13.2252687,8.4909847],[-13.2253675,8.491012],[-13.225384,8.4910431],[-13.2253907,8.4910711],[-13.2254014,8.4910936],[-13.2254269,8.4911188],[-13.2254645,8.4911452],[-13.2255463,8.4912178],[-13.225606,8.4912981],[-13.2256621,8.4913346],[-13.2257152,8.491339],[-13.2257977,8.4913183],[-13.2258645,8.4912784],[-13.2259223,8.4911797],[-13.2259432,8.4911598],[-13.2259678,8.4911524],[-13.2260033,8.4911686],[-13.2260274,8.4911992],[-13.2260183,8.4912422],[-13.2259928,8.491278],[-13.2260048,8.4913138],[-13.2261068,8.4913867],[-13.226149,8.4914321],[-13.2264735,8.4916869],[-13.2266902,8.4918322],[-13.2269544,8.4919146],[-13.2270549,8.4919292],[-13.2271706,8.4918983],[-13.2272547,8.4918775],[-13.227334,8.4918443],[-13.2273513,8.4918245],[-13.2273728,8.4918005],[-13.2274385,8.4917993],[-13.2274841,8.4918298],[-13.2275257,8.4918298],[-13.2275472,8.4918735],[-13.2275766,8.4918762],[-13.2275914,8.4918708],[-13.2275834,8.4917409],[-13.2275793,8.4916945],[-13.2275726,8.4916746],[-13.2275619,8.4916666],[-13.2275123,8.4916719],[-13.2274627,8.4916812],[-13.2274279,8.4916971],[-13.2273702,8.4917091],[-13.2273459,8.4916918],[-13.2273246,8.491664],[-13.2272863,8.4915772],[-13.2273181,8.4915372],[-13.2274208,8.4914953],[-13.2275637,8.4914544],[-13.2276085,8.4914507],[-13.227649,8.4914573],[-13.2277241,8.4914822],[-13.2277953,8.4915007],[-13.2278707,8.4914723],[-13.2280153,8.4914173],[-13.2280782,8.4913814],[-13.2281775,8.4912911],[-13.2281963,8.4912408],[-13.2281896,8.491205],[-13.2281841,8.491148],[-13.2281842,8.4910525],[-13.2281882,8.4909663],[-13.2281923,8.490888],[-13.228203,8.4908575],[-13.228219,8.4908297],[-13.2282325,8.4908018],[-13.2282513,8.4907779],[-13.2283464,8.4906904],[-13.2284685,8.4905551],[-13.2285557,8.4904543],[-13.2285852,8.4903986],[-13.2285919,8.4903283],[-13.2285905,8.4902567],[-13.2286053,8.4901385],[-13.2286268,8.4901054],[-13.2286589,8.4900802],[-13.2287675,8.4900073],[-13.2289191,8.4899821],[-13.2290895,8.4899012],[-13.2291779,8.4898216],[-13.2292705,8.489718],[-13.2293148,8.4896889],[-13.2293576,8.4896823],[-13.2294596,8.48973],[-13.2295602,8.4897645],[-13.2296513,8.4898188],[-13.2297211,8.489872],[-13.2298193,8.490031],[-13.2300375,8.4903162],[-13.2302172,8.4905709],[-13.2303581,8.4906904],[-13.2305351,8.4908335],[-13.2307431,8.490933],[-13.2310999,8.4910366],[-13.2312459,8.4911148],[-13.2313828,8.4912501],[-13.2314257,8.4912859],[-13.2314632,8.4913218],[-13.2315155,8.4913615],[-13.231561,8.4914251],[-13.2316013,8.4914941],[-13.2316081,8.4915723],[-13.231592,8.4916003],[-13.2315812,8.4916267],[-13.2315865,8.491648],[-13.2317045,8.4918151],[-13.2317678,8.4919416],[-13.2318059,8.4919834],[-13.231825,8.4920045],[-13.2318514,8.4920334],[-13.2319071,8.4920751],[-13.2319218,8.4921004],[-13.2319386,8.4921308],[-13.2319534,8.49215],[-13.231966,8.4921679],[-13.2319748,8.4921971],[-13.2319687,8.4922568],[-13.2319553,8.492302],[-13.2319634,8.4924186],[-13.2320023,8.4925632],[-13.232021,8.4926335],[-13.2320519,8.4926985],[-13.232076,8.4927409],[-13.2320948,8.4927926],[-13.2321176,8.4928351],[-13.2321455,8.4928904],[-13.2321634,8.4929567],[-13.2322264,8.4930795],[-13.2322688,8.4931496],[-13.2323262,8.4931834],[-13.2323842,8.4931978],[-13.2324508,8.4932126],[-13.2325341,8.4932027],[-13.2326406,8.4931622],[-13.2326827,8.4931365],[-13.2327254,8.493118],[-13.2327872,8.4930962],[-13.2329665,8.4930075],[-13.2330792,8.4929293],[-13.2331637,8.4928775],[-13.2334383,8.4926682],[-13.2335843,8.4925643],[-13.2336143,8.4925431],[-13.2338393,8.4924222],[-13.2339064,8.492369],[-13.2339551,8.4923463],[-13.2340188,8.4923308],[-13.2340659,8.4923215],[-13.2340842,8.4923099],[-13.2341661,8.4922775],[-13.2342621,8.4922197],[-13.2343184,8.4921707],[-13.2343828,8.492107],[-13.2344284,8.4920539],[-13.2345567,8.4919708],[-13.2346961,8.491898],[-13.2348105,8.4918351],[-13.2348762,8.4918018],[-13.2349232,8.4917926],[-13.2349702,8.4918112],[-13.2350239,8.4918497],[-13.2351097,8.4918774],[-13.2351587,8.4918895],[-13.2355146,8.491904],[-13.2355962,8.4918964],[-13.2356211,8.4918728],[-13.2356492,8.4918492],[-13.2357587,8.4917369],[-13.2357922,8.4917237],[-13.2358177,8.4917303],[-13.2359532,8.4918974],[-13.23598,8.4918774],[-13.2358472,8.4916945],[-13.2359505,8.4915975],[-13.2360034,8.4916513],[-13.2361194,8.4917568],[-13.2361302,8.4917568],[-13.2361469,8.4917548],[-13.2362194,8.4918351],[-13.2362616,8.4917979],[-13.2361905,8.4917144],[-13.2361865,8.4916971],[-13.2361972,8.4916852],[-13.236247,8.4916427],[-13.2361725,8.4915519],[-13.2361819,8.4915439],[-13.2362268,8.4914756],[-13.2362684,8.4914292],[-13.2363261,8.4913854],[-13.2363622,8.4913827],[-13.236418,8.4914284],[-13.23668,8.4912421],[-13.2368329,8.4911147],[-13.2374471,8.4905444],[-13.2374901,8.4904834],[-13.2374347,8.490397],[-13.2373695,8.4903162],[-13.2373534,8.4902658],[-13.2373898,8.4902063],[-13.2374633,8.4900828],[-13.2374857,8.4899963],[-13.2374809,8.4898381],[-13.2375281,8.4897433],[-13.2375859,8.4897149],[-13.2376595,8.4896706],[-13.2378154,8.4895785],[-13.237909,8.4895367],[-13.2379337,8.4895249],[-13.2380104,8.4894779],[-13.2383014,8.4893427],[-13.238386,8.4893427],[-13.238445,8.4893533],[-13.2385884,8.4893201],[-13.2387051,8.4892724],[-13.2389197,8.4891835],[-13.2389909,8.4891385],[-13.2390632,8.4890336],[-13.2391638,8.4888532],[-13.2392254,8.4885879],[-13.2392737,8.488511],[-13.2393127,8.4884792],[-13.239373,8.4884672],[-13.2399201,8.4885839],[-13.240183,8.4887033],[-13.2404298,8.488889],[-13.2407544,8.4889183],[-13.2408413,8.4889204],[-13.2409199,8.4889158],[-13.2410642,8.4889073],[-13.2413179,8.4887343],[-13.2415134,8.488507],[-13.2419064,8.4881913],[-13.2419927,8.4881604],[-13.2420652,8.4881995],[-13.242178,8.488296],[-13.2424509,8.4886454],[-13.242707,8.4889301],[-13.2428719,8.4891331],[-13.2430168,8.4893228],[-13.2431871,8.4895151],[-13.2433951,8.4898502],[-13.2434472,8.4899807],[-13.2434825,8.4901476],[-13.2434862,8.4902832],[-13.2434918,8.4904198],[-13.2435565,8.4906246],[-13.2436231,8.4907951],[-13.2436713,8.4908748],[-13.2437643,8.4909599],[-13.2439674,8.4911299],[-13.2441757,8.4913198],[-13.2445054,8.4915979],[-13.2447836,8.4918472],[-13.2450545,8.4920809],[-13.245134,8.4921541],[-13.2451668,8.4921844],[-13.2452116,8.4922256],[-13.2453154,8.4923524],[-13.2455588,8.4926308],[-13.2456976,8.4927383],[-13.2459256,8.4928762],[-13.2463669,8.4930888],[-13.2465793,8.4931524],[-13.2467535,8.4931921],[-13.2468371,8.4932338],[-13.2470495,8.4934201],[-13.2472023,8.4935818],[-13.2474008,8.4936429],[-13.2476288,8.4936614],[-13.2478273,8.4936217],[-13.2479614,8.4935395],[-13.248117,8.4933909],[-13.2482511,8.493322],[-13.2484142,8.4933095],[-13.2487714,8.4933617],[-13.2490057,8.4933899],[-13.2492274,8.4933749],[-13.2497585,8.4933298],[-13.2502118,8.4931494],[-13.2508655,8.4928033],[-13.251195,8.4925889],[-13.2515521,8.4922345],[-13.251973,8.4917688],[-13.2521671,8.4914782],[-13.252387,8.4910086],[-13.2524595,8.4909185],[-13.252548,8.4907647],[-13.2525802,8.4906956],[-13.2526284,8.4905684],[-13.2526928,8.4903747],[-13.2527411,8.4902686],[-13.2528041,8.4902314],[-13.2528578,8.4902048],[-13.2529758,8.4901731],[-13.2530308,8.4902089],[-13.253067,8.4902062],[-13.2530978,8.4901704],[-13.253134,8.4901227],[-13.2531595,8.4900577],[-13.2532078,8.4899727],[-13.2532628,8.489807],[-13.2532936,8.4897327],[-13.2533231,8.4896093],[-13.2533312,8.4892725],[-13.2533124,8.4892552],[-13.2532789,8.4892433],[-13.2532601,8.4892274],[-13.2532547,8.4891875],[-13.2532293,8.4883757],[-13.2531823,8.4883718],[-13.2531434,8.4883624],[-13.2531354,8.4883267],[-13.2530791,8.4879473],[-13.25313,8.4879076],[-13.2531837,8.4879023],[-13.2531944,8.4878519],[-13.253189,8.4877511],[-13.2531595,8.4876661],[-13.2530469,8.4874591],[-13.2528216,8.4871143],[-13.2527357,8.4870055],[-13.2526043,8.4868729],[-13.2525842,8.486792],[-13.2525882,8.4867443],[-13.2526177,8.4866767],[-13.2527223,8.486491],[-13.2527143,8.4863928],[-13.252674,8.4863477],[-13.2522234,8.4859948],[-13.2521087,8.4859094],[-13.2521463,8.4858681],[-13.2521766,8.4858347],[-13.2522425,8.4857507],[-13.2523803,8.4856115],[-13.2523924,8.4855896],[-13.2523885,8.4855678],[-13.2523696,8.4855532],[-13.2522503,8.4854543],[-13.252242,8.4854321],[-13.2522626,8.4853984],[-13.2522699,8.4853942],[-13.2522771,8.4853953],[-13.2522948,8.4854418],[-13.2523052,8.4854476],[-13.2523415,8.4854484],[-13.2524219,8.4854682],[-13.2524708,8.4854802],[-13.2525384,8.4854946],[-13.2525929,8.4854857],[-13.2526982,8.4854696],[-13.2527685,8.4854133],[-13.2528098,8.4853181],[-13.2528408,8.4852353],[-13.2528793,8.4851566],[-13.2529202,8.485103],[-13.2530139,8.4850527],[-13.2533907,8.4848755],[-13.2536557,8.4847162],[-13.2539311,8.4846302],[-13.2543117,8.4845027],[-13.2547279,8.4843441],[-13.2549029,8.4843325],[-13.2550699,8.4843125],[-13.2551547,8.4843149],[-13.2552386,8.4843249],[-13.2553263,8.4843278],[-13.2554071,8.4843324],[-13.2555017,8.4843403],[-13.2555451,8.4843333],[-13.2555595,8.484305],[-13.2555757,8.484294],[-13.2556419,8.4843033],[-13.2556581,8.4843143],[-13.255671,8.4843777],[-13.2556868,8.4843886],[-13.2557798,8.4843875],[-13.2557921,8.4843806],[-13.2558337,8.4842971],[-13.2558766,8.4842891],[-13.255945,8.4842918],[-13.2559826,8.4843156],[-13.2560013,8.4843528],[-13.2560198,8.4844397],[-13.2560898,8.4844845],[-13.2561878,8.4845359],[-13.2562425,8.4845717],[-13.2563288,8.484611],[-13.2564132,8.4846652],[-13.2564974,8.4847602],[-13.2565443,8.4848412],[-13.2565817,8.4849655],[-13.2565829,8.4854374],[-13.256637,8.4855121],[-13.2567412,8.4855503],[-13.2569352,8.4855619],[-13.2570861,8.4856191],[-13.2571698,8.4856659],[-13.2574062,8.4857767],[-13.2575251,8.4858376],[-13.2576474,8.4859474],[-13.2578954,8.4861967],[-13.257932,8.4862663],[-13.2579784,8.4863539],[-13.257966,8.4864074],[-13.257782,8.4865354],[-13.2577883,8.4865963],[-13.2578896,8.4867629],[-13.2579053,8.4867968],[-13.2579017,8.4868252],[-13.2577874,8.4869442],[-13.2577783,8.4869764],[-13.257806,8.487143],[-13.2578342,8.4872063],[-13.2578349,8.4872833],[-13.2577421,8.4873465],[-13.2577228,8.4873674],[-13.2577179,8.4874075],[-13.2577381,8.4874553],[-13.2577313,8.4874844],[-13.2577139,8.4875043],[-13.2574758,8.4875905],[-13.2574544,8.4876078],[-13.2574604,8.4876449],[-13.2578046,8.4881342],[-13.2578299,8.4881437],[-13.2578588,8.488141],[-13.2581403,8.4879965],[-13.2586141,8.4877225],[-13.2588493,8.4875399],[-13.2589839,8.4874274],[-13.2590021,8.4873956],[-13.2590021,8.4873957],[-13.2589947,8.4873664],[-13.2589129,8.4872483],[-13.2589114,8.4871907],[-13.2589155,8.4871648],[-13.2589357,8.4871091],[-13.2589535,8.4870729],[-13.2589826,8.4870454],[-13.2592609,8.4869336],[-13.2593353,8.4869167],[-13.2594037,8.4869459],[-13.2595755,8.4871396],[-13.2594439,8.4873014],[-13.259403,8.4873346],[-13.259399,8.4873475],[-13.2594081,8.4873611],[-13.2594243,8.4873786],[-13.2594793,8.4874223],[-13.2594976,8.4874195],[-13.2595224,8.4874219],[-13.2595695,8.4874458],[-13.2596033,8.4874932],[-13.2596296,8.4875574],[-13.2596833,8.4876064],[-13.259711,8.487623],[-13.2597866,8.4876277],[-13.2598381,8.4876923],[-13.2598931,8.4877653],[-13.2599144,8.4877901],[-13.2599267,8.4877942],[-13.2599629,8.4877855],[-13.2601126,8.4879625],[-13.2601614,8.4879911],[-13.2602317,8.4879942],[-13.2602955,8.4880725],[-13.2602975,8.4881199],[-13.2602492,8.4881706],[-13.260199,8.4882193],[-13.2601652,8.4882683],[-13.2601587,8.4884661],[-13.260146,8.4885831],[-13.2600699,8.4889067],[-13.2598221,8.4893194],[-13.2593343,8.4896238],[-13.2592615,8.4897433],[-13.2592101,8.4898718],[-13.2591985,8.4900126],[-13.259226,8.4901565],[-13.2592601,8.4901953],[-13.2593519,8.4902924],[-13.2595621,8.4906658],[-13.2597204,8.4908365],[-13.2599483,8.4911029],[-13.2600371,8.4912369],[-13.2601236,8.4913448],[-13.2602862,8.4915013],[-13.2604312,8.4917426],[-13.2604526,8.4917957],[-13.2605018,8.4919642],[-13.26054,8.4920326],[-13.2605423,8.4920844],[-13.2604497,8.4921825],[-13.2604525,8.4922555],[-13.2605705,8.4924359],[-13.2606873,8.4925848],[-13.2608822,8.4927222],[-13.2611501,8.4930932],[-13.2611623,8.4931321],[-13.261219,8.4932121],[-13.2612863,8.4932707],[-13.2614505,8.4935089],[-13.2616043,8.4940086],[-13.2616675,8.4940555],[-13.2617518,8.4940608],[-13.2619818,8.4940048],[-13.2622797,8.4939994],[-13.2624825,8.4940309],[-13.2626385,8.4940886],[-13.2626769,8.4941226],[-13.2627068,8.4941722],[-13.2629123,8.4945277],[-13.262959,8.4945568],[-13.2632197,8.4946078],[-13.263253,8.4946203],[-13.2637223,8.4952832],[-13.2638855,8.4954477],[-13.2641723,8.4956487],[-13.2646671,8.4958632],[-13.2649608,8.4958819],[-13.2651124,8.495937],[-13.2652573,8.496043],[-13.2657367,8.4962598],[-13.2660701,8.4965055],[-13.2663633,8.4965588],[-13.266609,8.4964986],[-13.2667791,8.4964576],[-13.2669281,8.4964659],[-13.2670943,8.4964664],[-13.2672178,8.4965013],[-13.267324,8.4965584],[-13.267481,8.4966488],[-13.2675712,8.4967609],[-13.2676552,8.4968401],[-13.2680755,8.4971638],[-13.2681571,8.4972003],[-13.2682425,8.4971824],[-13.2683381,8.4971247],[-13.2684497,8.4969884],[-13.2685407,8.4969284],[-13.2687095,8.4968388],[-13.2690047,8.4966098],[-13.2692885,8.4962889],[-13.2693244,8.4962609],[-13.2695081,8.4960971],[-13.2697177,8.4959389],[-13.2700134,8.4955911],[-13.2701502,8.4954878],[-13.270314,8.4954543],[-13.2705372,8.4953581],[-13.2706552,8.4952901],[-13.2708038,8.4951361],[-13.2708765,8.4948951],[-13.2709413,8.4948252],[-13.2710487,8.4947688],[-13.2712066,8.4946861],[-13.2712787,8.4944661],[-13.2713132,8.4942622],[-13.2712595,8.4941128],[-13.2711707,8.494034],[-13.2710932,8.4939571],[-13.2710746,8.4936227],[-13.271231,8.4933946],[-13.2713315,8.4933212],[-13.2714427,8.4932475],[-13.2715588,8.4931715],[-13.2716416,8.4930756],[-13.2717492,8.4929523],[-13.2719328,8.4926792],[-13.2720532,8.4925205],[-13.2721214,8.4924731],[-13.2722149,8.4924601],[-13.2723951,8.4925539],[-13.2727195,8.4925864],[-13.2727977,8.4925554],[-13.2728899,8.4924996],[-13.2728862,8.4924218],[-13.2728496,8.4924014],[-13.2725197,8.4923617],[-13.2724649,8.4923034],[-13.2724386,8.4920565],[-13.2724512,8.4919466],[-13.272555,8.4917595],[-13.2725596,8.4916313],[-13.2721884,8.4912517],[-13.2720369,8.49064],[-13.2720383,8.490553],[-13.2724765,8.4899026],[-13.272643,8.4897279],[-13.2728709,8.4895662],[-13.2730391,8.4892985],[-13.2730752,8.4892051],[-13.273091,8.4891093],[-13.2732548,8.4889214],[-13.2734783,8.4888193],[-13.2736033,8.4886676],[-13.273673,8.4885466],[-13.2736902,8.4884198],[-13.2737323,8.4883305],[-13.2737992,8.4882954],[-13.2738896,8.4883823],[-13.2739656,8.4883356],[-13.2739433,8.4879665],[-13.273877,8.487717],[-13.2736331,8.4872659],[-13.2736265,8.487067],[-13.2736737,8.4868496],[-13.2737815,8.4866602],[-13.2737978,8.4865918],[-13.2737905,8.4865196],[-13.2738037,8.4864756],[-13.2738617,8.486433],[-13.274101,8.4863975],[-13.2742607,8.4863841],[-13.2744615,8.4864067],[-13.2746176,8.4863873],[-13.2747511,8.4862966],[-13.2748089,8.4861979],[-13.2748164,8.4860983],[-13.2748063,8.4859825],[-13.2747973,8.4856358],[-13.2748147,8.4855458],[-13.2748355,8.485461],[-13.2748873,8.4853356],[-13.2748968,8.4851382],[-13.2748642,8.484845],[-13.2748319,8.4843925],[-13.2748563,8.484232],[-13.2748802,8.4840663],[-13.274852,8.4839972],[-13.2747447,8.483988],[-13.2746475,8.4839761],[-13.2745904,8.4839787],[-13.2743732,8.4839574],[-13.2742659,8.4839429],[-13.2742458,8.4838169],[-13.2743075,8.4836577],[-13.2743786,8.4836576],[-13.2745771,8.4836656],[-13.2750625,8.4837239],[-13.2751349,8.4836498],[-13.2751672,8.4835223],[-13.2751537,8.4829626],[-13.2751188,8.4828539],[-13.2750651,8.4827664],[-13.2749498,8.4825674],[-13.274923,8.4825011],[-13.2749176,8.4824586],[-13.2749444,8.4824321],[-13.27499,8.4824294],[-13.2750754,8.4824684],[-13.2753173,8.4826443],[-13.2753928,8.4826909],[-13.2757545,8.4828406],[-13.2759851,8.4827982],[-13.2762533,8.4826894],[-13.2763955,8.4825356],[-13.2764733,8.4824188],[-13.27667,8.4821455],[-13.2767871,8.4820793],[-13.2769239,8.4821084],[-13.276955,8.4821021],[-13.276999,8.4820501],[-13.2770205,8.4819599],[-13.2770446,8.4818219],[-13.2769669,8.4816194],[-13.2769159,8.4813497],[-13.27694,8.4813285],[-13.2770392,8.4812675],[-13.2770902,8.4812012],[-13.2771036,8.4811852],[-13.2771666,8.4811428],[-13.2772028,8.4811295],[-13.2772377,8.4810977],[-13.2772739,8.4810194],[-13.2772699,8.4809823],[-13.2772619,8.4809345],[-13.2772458,8.4808894],[-13.2772659,8.4807648],[-13.2773004,8.4805555],[-13.2772972,8.4804765],[-13.2771636,8.4802799],[-13.2770527,8.4801278],[-13.2768796,8.4799278],[-13.2769829,8.4797301],[-13.2769319,8.4794556],[-13.276885,8.4793733],[-13.276771,8.4792699],[-13.2766745,8.4791956],[-13.2766289,8.4791014],[-13.2766262,8.4789807],[-13.2766718,8.478856],[-13.276771,8.4787181],[-13.2769051,8.4785018],[-13.2769252,8.478405],[-13.2768998,8.4783161],[-13.2767282,8.4781318],[-13.2766476,8.4780694],[-13.2766329,8.4780203],[-13.2766436,8.4779726],[-13.2766664,8.4779408],[-13.2767335,8.4778705],[-13.2769451,8.477647],[-13.2773721,8.4773029],[-13.2774204,8.4772682],[-13.2775483,8.4773785],[-13.2775877,8.4773744],[-13.2778194,8.4770528],[-13.2778901,8.4769318],[-13.2779502,8.4767272],[-13.2780772,8.4764817],[-13.2781007,8.47638],[-13.2780746,8.476296],[-13.278037,8.4762031],[-13.2780598,8.4761633],[-13.2781148,8.4761169],[-13.2782073,8.47604],[-13.278275,8.4759574],[-13.2782831,8.4759192],[-13.2782798,8.4758848],[-13.2781859,8.4757597],[-13.2783243,8.4754367],[-13.2786419,8.474978],[-13.2791003,8.474369],[-13.2792711,8.4741027],[-13.2793439,8.4738825],[-13.2793551,8.4736464],[-13.2793888,8.4733023],[-13.2793137,8.4731085],[-13.279237,8.4728646],[-13.2792841,8.4725791],[-13.2793062,8.472388],[-13.2793366,8.4722499],[-13.2793555,8.4720375],[-13.2794204,8.4714779],[-13.2794021,8.4712999],[-13.2793083,8.4709597],[-13.2792714,8.4708316],[-13.2791418,8.4704454],[-13.2790764,8.4701942],[-13.2790399,8.470016],[-13.2790396,8.469912],[-13.2789995,8.4698564],[-13.2789265,8.4697661],[-13.2786115,8.4695455],[-13.2783642,8.4694328],[-13.2781765,8.4692604],[-13.278051,8.4690916],[-13.2778734,8.468808],[-13.2778452,8.4687457],[-13.2778486,8.4687271],[-13.277868,8.4687033],[-13.2778801,8.4686774],[-13.2778087,8.4685486],[-13.2777312,8.4684088],[-13.2776709,8.4683106],[-13.2775896,8.4681535],[-13.2776749,8.468048],[-13.2778252,8.4679842],[-13.278029,8.4681222],[-13.278383,8.4683875],[-13.2789624,8.4689658],[-13.2796061,8.469576],[-13.2801745,8.4702458],[-13.2806629,8.4712367],[-13.2810439,8.4716506],[-13.2814791,8.4724361],[-13.2814944,8.4727543],[-13.2813174,8.4731628],[-13.2811672,8.4734229],[-13.2808024,8.4737835],[-13.2803483,8.4742715],[-13.2802123,8.4746432],[-13.280211,8.4751119],[-13.2802606,8.4757256],[-13.280282,8.4760439],[-13.2803679,8.476219],[-13.2805395,8.4764259],[-13.2805985,8.4766647],[-13.2805717,8.476808],[-13.2805449,8.4769512],[-13.2805288,8.4770944],[-13.2803839,8.4778531],[-13.2802445,8.4782565],[-13.2800835,8.4785536],[-13.2799012,8.478771],[-13.27959,8.4788772],[-13.2791072,8.4790152],[-13.27878,8.4791584],[-13.2787068,8.4793294],[-13.2786888,8.4794609],[-13.2788014,8.4796466],[-13.2791448,8.4800762],[-13.2793505,8.4807726],[-13.2794988,8.4811428],[-13.2796938,8.4818167],[-13.2797563,8.4820448],[-13.2798582,8.4826921],[-13.2798851,8.4828087],[-13.279987,8.4828725],[-13.2802445,8.4829043],[-13.2803625,8.4829201],[-13.2804215,8.4830476],[-13.2803732,8.4832598],[-13.2802603,8.483557],[-13.2798483,8.4845757],[-13.2799119,8.4852866],[-13.2800674,8.4857322],[-13.2803357,8.4866925],[-13.2806575,8.4870268],[-13.2807916,8.4871223],[-13.281194,8.4872391],[-13.2816875,8.4873611],[-13.2820822,8.4874043],[-13.2823956,8.4873399],[-13.2826799,8.4871754],[-13.282873,8.4870003],[-13.2831198,8.4866767],[-13.2832824,8.4865775],[-13.2833666,8.4866714],[-13.283388,8.4868677],[-13.2833451,8.487133],[-13.2831895,8.487446],[-13.2828784,8.4878438],[-13.2826799,8.4882842],[-13.2818699,8.4890004],[-13.2816715,8.4894567],[-13.281414,8.4901677],[-13.2813227,8.4905072],[-13.2808775,8.4908098],[-13.2805047,8.4911731],[-13.2802967,8.4913617],[-13.2801533,8.4915738],[-13.2801211,8.491908],[-13.280054,8.4920301],[-13.2799253,8.4921493],[-13.2797152,8.4921807],[-13.2794554,8.4921894],[-13.2792467,8.4921813],[-13.2789758,8.4921228],[-13.278632,8.4921959],[-13.2782074,8.4922697],[-13.278037,8.4923138],[-13.2777473,8.4923403],[-13.2775542,8.4923272],[-13.277404,8.4923218],[-13.2770674,8.492214],[-13.2764308,8.4920441],[-13.2761192,8.4919001],[-13.2760441,8.4918868],[-13.2758062,8.4919028],[-13.2757464,8.4918974],[-13.275454,8.4919531],[-13.2753307,8.4920009],[-13.275262,8.4920407],[-13.2752395,8.4921229],[-13.2751779,8.4923219],[-13.2750544,8.4924545],[-13.274923,8.492587],[-13.2748586,8.4926614],[-13.2747728,8.4927409],[-13.2746179,8.4928192],[-13.2744912,8.4928739],[-13.2743966,8.4929111],[-13.2743,8.4929685],[-13.2741955,8.4930301],[-13.2741572,8.4930559],[-13.2741163,8.4930833],[-13.2740937,8.4930972],[-13.2740766,8.4931075],[-13.2740639,8.4931146],[-13.2740645,8.493149],[-13.274064,8.49323],[-13.2740687,8.4932668],[-13.2740757,8.4932824],[-13.2740908,8.4932996],[-13.2741082,8.4933119],[-13.2741354,8.4933245],[-13.2741904,8.4933315],[-13.2742528,8.4933265],[-13.2743664,8.4933099],[-13.2744906,8.4932874],[-13.2745682,8.4932802],[-13.2747191,8.4932848],[-13.2748747,8.4933378],[-13.2749794,8.4934069],[-13.2750643,8.4935344],[-13.2751697,8.4937251],[-13.2752287,8.4938552],[-13.2752985,8.4938922],[-13.2753816,8.4939162],[-13.275505,8.4939003],[-13.275623,8.4939188],[-13.2757518,8.4939426],[-13.2759529,8.4939374],[-13.2760012,8.4938645],[-13.2760173,8.4937902],[-13.27602,8.4937371],[-13.276024,8.4936894],[-13.2760374,8.4936483],[-13.2760589,8.4935634],[-13.2760777,8.4935196],[-13.2761354,8.4934772],[-13.2762655,8.4934493],[-13.2763794,8.493444],[-13.2764573,8.4934692],[-13.2765457,8.493509],[-13.2766584,8.4936297],[-13.2767388,8.4937119],[-13.2768112,8.4937278],[-13.2769266,8.4937464],[-13.2771841,8.4938392],[-13.2772914,8.4939372],[-13.2773691,8.4939453],[-13.2775141,8.4939082],[-13.2776722,8.4938047],[-13.2778493,8.4937305],[-13.2779606,8.493627],[-13.2780197,8.4935461],[-13.2780759,8.4934306],[-13.2781685,8.4933047],[-13.2783186,8.493249],[-13.2784529,8.4932994],[-13.2784957,8.4933644],[-13.2785132,8.4934042],[-13.2785411,8.4934373],[-13.2785615,8.4934612],[-13.2785977,8.4934957],[-13.2786781,8.4936668],[-13.2786889,8.4937597],[-13.2787129,8.4938353],[-13.2787814,8.4938698],[-13.2788551,8.4938724],[-13.2789852,8.4938697],[-13.2791059,8.4938617],[-13.2791823,8.4938021],[-13.2792199,8.4937345],[-13.2792802,8.4936614],[-13.2794109,8.4935218],[-13.2794935,8.4934825],[-13.2796049,8.4934944],[-13.2797013,8.4935077],[-13.2800702,8.4936867],[-13.2801413,8.4937504],[-13.2801788,8.4938405],[-13.2804796,8.4940531],[-13.280498,8.4940807],[-13.280498,8.4941178],[-13.2803076,8.4945078],[-13.2802109,8.4947504],[-13.2802191,8.4948314],[-13.2802392,8.49498],[-13.280266,8.4950224],[-13.2803062,8.4950821],[-13.2806535,8.4952916],[-13.2807555,8.4953805],[-13.280832,8.49548],[-13.2808454,8.4955039],[-13.2808588,8.4956087],[-13.2809418,8.4959329],[-13.2810592,8.4960928],[-13.2811712,8.4962293],[-13.2812665,8.4962599],[-13.2814663,8.4962865],[-13.2817009,8.4962081],[-13.2820818,8.4959614],[-13.2825526,8.4954601],[-13.2826719,8.4953115],[-13.2828316,8.4950821],[-13.2828301,8.4950476],[-13.2828128,8.4950317],[-13.282739,8.4949455],[-13.2827202,8.4949004],[-13.2827363,8.4948685],[-13.2828021,8.4948009],[-13.2829345,8.494715],[-13.283132,8.4946935],[-13.2833519,8.4947113],[-13.2833988,8.4947226],[-13.2834874,8.494781],[-13.2837153,8.4949495],[-13.2837395,8.4949747],[-13.283793,8.4950847],[-13.2838453,8.4951935],[-13.2839137,8.4952756],[-13.2840706,8.4954508],[-13.2843013,8.4956523],[-13.2844907,8.4958599],[-13.2844513,8.4959068],[-13.2845168,8.495971],[-13.2845382,8.495949],[-13.2845732,8.4959925],[-13.284554,8.4960091],[-13.284439,8.496135],[-13.2844148,8.4961531],[-13.2843991,8.4961379],[-13.2843847,8.496119],[-13.2843841,8.4960869],[-13.28435,8.4960869],[-13.2843551,8.4962007],[-13.2843617,8.4962216],[-13.2843882,8.4962331],[-13.2844115,8.4962169],[-13.284598,8.4960343],[-13.2846128,8.4960199],[-13.2846299,8.4960027],[-13.2846795,8.4960467],[-13.2848203,8.4961696],[-13.2849143,8.4963024],[-13.2850349,8.4965238],[-13.2851704,8.4966658],[-13.2852818,8.4967653],[-13.2853631,8.4968461],[-13.2853783,8.4969032],[-13.2854025,8.497],[-13.2854212,8.4970611],[-13.2854573,8.4971021],[-13.2855138,8.4971035],[-13.285554,8.4970916],[-13.2856117,8.4970756],[-13.2857256,8.4971075],[-13.2857377,8.497134],[-13.2857283,8.4972202],[-13.2857013,8.4974505],[-13.2857257,8.4975717],[-13.2857833,8.4977959],[-13.2859281,8.4980756],[-13.2860368,8.4982747],[-13.2860851,8.498341],[-13.2861293,8.4983821],[-13.2861776,8.4984339],[-13.2862313,8.4985121],[-13.2862514,8.4985519],[-13.2862581,8.498597],[-13.2862326,8.4986169],[-13.2862124,8.4986327],[-13.2864686,8.4990294],[-13.2865249,8.4991089],[-13.2865598,8.499105],[-13.286584,8.4990917],[-13.2866175,8.4991116],[-13.2866564,8.4991528],[-13.28682,8.4992217],[-13.287233,8.4993702],[-13.2872377,8.4993727],[-13.2873404,8.499426],[-13.2877319,8.499536],[-13.2878299,8.4995639],[-13.2878781,8.4995905],[-13.2879224,8.499609],[-13.2880492,8.4996238],[-13.2881262,8.499617],[-13.2881692,8.4995984],[-13.2882429,8.4995321],[-13.2884039,8.4994963],[-13.2886022,8.499463],[-13.288967,8.4994365],[-13.2892299,8.4993755],[-13.2896242,8.499333],[-13.2901512,8.4991302],[-13.2902853,8.499028],[-13.290461,8.4987919],[-13.2905214,8.4985944],[-13.2905389,8.4985453],[-13.2905321,8.4984975],[-13.2904933,8.4984153],[-13.2904866,8.4983729],[-13.2904972,8.4983012],[-13.290579,8.4981844],[-13.2905817,8.498081],[-13.2905751,8.4979842],[-13.2905871,8.4979166],[-13.2906823,8.4976394],[-13.2907158,8.4974828],[-13.2907037,8.4972241],[-13.2907038,8.4971048],[-13.2907126,8.4970464],[-13.2907173,8.4970292],[-13.2907897,8.4969722],[-13.290841,8.4969456],[-13.2908742,8.496939],[-13.2909814,8.4969787],[-13.2911598,8.4969417],[-13.2913193,8.4969369],[-13.2915165,8.4969562],[-13.2916921,8.4969336],[-13.2918343,8.4967918],[-13.2920557,8.496496],[-13.2920919,8.496427],[-13.2921213,8.4963593],[-13.2921293,8.495931],[-13.2921387,8.4957465],[-13.2920086,8.4955317],[-13.2919886,8.4955105],[-13.2918424,8.4954031],[-13.2916573,8.4951536],[-13.2915124,8.4950608],[-13.2914387,8.4949985],[-13.2914062,8.4949299],[-13.2913676,8.4948485],[-13.2913502,8.49472],[-13.2913756,8.4945965],[-13.2914145,8.4945396],[-13.2916225,8.494334],[-13.2918437,8.4941549],[-13.2920355,8.4940965],[-13.2922648,8.4940289],[-13.2926349,8.4940342],[-13.2929723,8.4940439],[-13.2931003,8.4940474],[-13.2934503,8.4941085],[-13.2936716,8.4941987],[-13.2940283,8.4943923],[-13.2941356,8.4944905],[-13.2943675,8.4946696],[-13.2944682,8.4947837],[-13.2945353,8.494891],[-13.2946064,8.4950343],[-13.2946695,8.4952333],[-13.2946614,8.4952983],[-13.2946507,8.4953354],[-13.2944644,8.4954084],[-13.2944241,8.4954429],[-13.2944067,8.4954894],[-13.2944334,8.4956193],[-13.2944442,8.4956803],[-13.294416,8.4957161],[-13.2943812,8.495728],[-13.2943261,8.4957161],[-13.294251,8.4957267],[-13.2941276,8.4958274],[-13.2940647,8.495988],[-13.2940646,8.4960928],[-13.2940718,8.4962311],[-13.2941398,8.4964072],[-13.2941416,8.4964315],[-13.2940765,8.4964687],[-13.2939948,8.4965211],[-13.2939721,8.4965424],[-13.2940097,8.4966511],[-13.2941347,8.4966462],[-13.2941386,8.4966495],[-13.2941769,8.4966813],[-13.2942247,8.4967422],[-13.2942457,8.4967832],[-13.2942618,8.4968223],[-13.2942715,8.4968701],[-13.2943039,8.4969635],[-13.2943423,8.4970438],[-13.2944992,8.4971924],[-13.2945817,8.4972674],[-13.2946212,8.4972786],[-13.2947272,8.4972786],[-13.2948438,8.4972852],[-13.2950798,8.4973475],[-13.2951777,8.4973953],[-13.2953145,8.4974988],[-13.2954365,8.4975942],[-13.295497,8.4976765],[-13.2955519,8.4977786],[-13.2956363,8.4978846],[-13.2957655,8.4980548],[-13.2958306,8.4981803],[-13.2958558,8.4982287],[-13.2959114,8.4983516],[-13.2959007,8.4984192],[-13.2958684,8.4984286],[-13.2957611,8.4984391],[-13.2956726,8.4985241],[-13.2956538,8.4985638],[-13.2956646,8.4986063],[-13.2957343,8.4986832],[-13.2958767,8.4988677],[-13.2961124,8.4990306],[-13.2962735,8.4990732],[-13.2964593,8.4990458],[-13.2965792,8.4990122],[-13.2967588,8.4989484],[-13.2968447,8.4988981],[-13.2968795,8.4988238],[-13.2968956,8.4986699],[-13.2968849,8.498601],[-13.2968554,8.4984577],[-13.2968661,8.4983091],[-13.2968795,8.4982004],[-13.2969198,8.4981129],[-13.2969278,8.4980651],[-13.2969412,8.4980227],[-13.29696,8.4979696],[-13.2969868,8.4979297],[-13.2970002,8.4978794],[-13.2970003,8.4977441],[-13.2970244,8.4975929],[-13.297062,8.4974789],[-13.2971183,8.4973754],[-13.297137,8.4971286],[-13.2971348,8.4967805],[-13.2971586,8.4967069],[-13.2972335,8.4966308],[-13.2975608,8.496537],[-13.2976494,8.4964947],[-13.2977326,8.4964178],[-13.297809,8.4960959]]],[[[-13.2453168,8.0930301],[-13.2449038,8.0930408],[-13.2440294,8.0932585],[-13.2435788,8.0934551],[-13.2426722,8.0940392],[-13.242125,8.0944959],[-13.2416798,8.0949474],[-13.2416261,8.0950483],[-13.2417012,8.0951651],[-13.2417978,8.0952396],[-13.2419104,8.0952501],[-13.2420392,8.0953511],[-13.2421357,8.0954839],[-13.2421411,8.0955794],[-13.2420767,8.0956485],[-13.2419587,8.095744],[-13.2414384,8.0958768],[-13.2411702,8.0961689],[-13.2410307,8.0966628],[-13.240918,8.0968646],[-13.2408881,8.0971175],[-13.2409236,8.0972652],[-13.2410315,8.0974192],[-13.2410378,8.0976831],[-13.2411594,8.0979481],[-13.2414545,8.0981924],[-13.2417269,8.0987904],[-13.2424482,8.0996571],[-13.2428999,8.099934],[-13.2433766,8.1001131],[-13.2437319,8.1004067],[-13.2440177,8.1004855],[-13.2442704,8.1004418],[-13.2448072,8.1000087],[-13.2449521,8.0998494],[-13.2449896,8.099706],[-13.2450325,8.0996104],[-13.2450433,8.0995254],[-13.2450808,8.0993768],[-13.2451023,8.0992334],[-13.2450594,8.0990263],[-13.2449574,8.098819],[-13.2449252,8.0985802],[-13.2449199,8.0984526],[-13.2448877,8.0983198],[-13.2447965,8.0980703],[-13.2446517,8.097895],[-13.2445605,8.0977729],[-13.2444961,8.0976294],[-13.2443513,8.0974171],[-13.2440884,8.0970027],[-13.243906,8.0966895],[-13.2438524,8.0965514],[-13.2439328,8.096153],[-13.2442332,8.0958396],[-13.2445766,8.0956272],[-13.2448072,8.0955953],[-13.2450003,8.0955901],[-13.2458479,8.0954254],[-13.2463951,8.0954095],[-13.246983,8.0953737],[-13.2471944,8.0952821],[-13.2475538,8.0952873],[-13.247822,8.0954147],[-13.248101,8.0955156],[-13.2484079,8.0954426],[-13.2485463,8.0954303],[-13.2487715,8.0954361],[-13.2491631,8.0955458],[-13.2493455,8.0955264],[-13.2495708,8.0954733],[-13.2498122,8.0952051],[-13.2499732,8.0950537],[-13.2503272,8.094642],[-13.2504533,8.0939861],[-13.2503782,8.093686],[-13.2502655,8.093471],[-13.2500912,8.0933356],[-13.2497988,8.0932586],[-13.2494957,8.0931549],[-13.2492168,8.0930621],[-13.2485328,8.0930647],[-13.24794,8.0932904],[-13.2475431,8.0932745],[-13.2470066,8.0931205],[-13.2466526,8.0931046],[-13.2462985,8.0931788],[-13.2460732,8.0932161],[-13.2457085,8.0931469],[-13.2453168,8.0930301]]],[[[-13.2393522,8.0978181],[-13.2389956,8.0979245],[-13.2384719,8.0980968],[-13.2379837,8.0981021],[-13.2373453,8.0982455],[-13.2369108,8.098442],[-13.236766,8.0984951],[-13.2365889,8.0985323],[-13.2364058,8.0986043],[-13.236088,8.0987207],[-13.2358916,8.0988084],[-13.2357092,8.09892],[-13.2353229,8.0991324],[-13.2348133,8.0994032],[-13.2345022,8.0993979],[-13.233558,8.0992227],[-13.2332362,8.0991696],[-13.2326944,8.0991165],[-13.2319863,8.0989996],[-13.2315379,8.0988376],[-13.2311441,8.0990155],[-13.2309456,8.0990209],[-13.2308168,8.0988084],[-13.230672,8.0986916],[-13.2303984,8.0987181],[-13.2302267,8.0988615],[-13.2300229,8.0991271],[-13.2296419,8.0992653],[-13.2291913,8.0992014],[-13.2289767,8.0992175],[-13.2287568,8.099313],[-13.2285101,8.0995042],[-13.2278128,8.0997219],[-13.2272602,8.0998547],[-13.2269598,8.0998972],[-13.22608,8.0999662],[-13.2255366,8.100088],[-13.2252325,8.1002264],[-13.2250125,8.100407],[-13.2248031,8.1006028],[-13.2245673,8.1007363],[-13.2239661,8.1010579],[-13.2238163,8.1011452],[-13.2236714,8.1012621],[-13.2235159,8.1013895],[-13.2234043,8.1014862],[-13.2230574,8.1017094],[-13.2227326,8.1020746],[-13.2225985,8.1022233],[-13.2224913,8.1023508],[-13.2223786,8.1024995],[-13.222282,8.1026535],[-13.2222498,8.1028288],[-13.2221104,8.1030518],[-13.2219547,8.1029987],[-13.2217724,8.1028872],[-13.2215536,8.1027208],[-13.2213915,8.1027172],[-13.2211341,8.1026004],[-13.2208605,8.1024358],[-13.2205278,8.1022925],[-13.2201041,8.102149],[-13.2195676,8.1018834],[-13.2190688,8.1015807],[-13.218956,8.1015913],[-13.2188648,8.1016658],[-13.2189077,8.1018463],[-13.2190847,8.1021066],[-13.2191974,8.1023456],[-13.2195033,8.102611],[-13.2197983,8.1030306],[-13.2197982,8.1034024],[-13.2199271,8.1036679],[-13.2199752,8.1037741],[-13.2199806,8.1039175],[-13.2199002,8.1040874],[-13.219548,8.1042998],[-13.2193169,8.1044728],[-13.2192031,8.1045928],[-13.2191226,8.1047779],[-13.2190705,8.1049632],[-13.2190862,8.1055269],[-13.2191063,8.1060524],[-13.2191601,8.1063199],[-13.2194094,8.1069314],[-13.2194817,8.1070084],[-13.2196132,8.1069951],[-13.2197982,8.1070615],[-13.2199028,8.1071146],[-13.2200074,8.1072022],[-13.2200611,8.1072792],[-13.2200719,8.1073722],[-13.2200369,8.1074651],[-13.2199565,8.1075315],[-13.2199082,8.1077254],[-13.2198847,8.1077931],[-13.219935,8.1078475],[-13.2201201,8.1079803],[-13.2202703,8.1081503],[-13.2203025,8.1082644],[-13.2202596,8.1083892],[-13.2201308,8.1084663],[-13.2200397,8.1085735],[-13.2198894,8.1089522],[-13.2199271,8.1091699],[-13.2199565,8.1092628],[-13.2198975,8.1093611],[-13.2198519,8.1094248],[-13.2197633,8.109446],[-13.2196838,8.1094782],[-13.219589,8.1097037],[-13.2195435,8.1098948],[-13.2193093,8.1104184],[-13.2191322,8.1115419],[-13.2192833,8.1117084],[-13.2194872,8.1114748],[-13.219589,8.1113526],[-13.2197393,8.1113314],[-13.2200772,8.1115385],[-13.2204152,8.1118146],[-13.2206888,8.1120483],[-13.2211072,8.1120749],[-13.2213701,8.1119262],[-13.2216007,8.1117509],[-13.221928,8.111496],[-13.222164,8.1110658],[-13.2222283,8.1109596],[-13.2223464,8.1108906],[-13.2226897,8.1109543],[-13.2232423,8.1108056],[-13.2235748,8.1108322],[-13.2238215,8.1108375],[-13.2241596,8.1108056],[-13.2243794,8.1107897],[-13.224696,8.1107259],[-13.2259835,8.110864],[-13.2262624,8.1108375],[-13.2268525,8.1106994],[-13.2272334,8.1105454],[-13.2277323,8.1102427],[-13.2283224,8.1099081],[-13.2290627,8.1096691],[-13.229642,8.1094514],[-13.2300336,8.1092973],[-13.2303555,8.1092761],[-13.2307793,8.1092177],[-13.2311711,8.1090769],[-13.2314311,8.1088209],[-13.2318169,8.108509],[-13.2319501,8.1083069],[-13.232123,8.1078036],[-13.2323121,8.1075995],[-13.2323421,8.1074079],[-13.2325038,8.107028],[-13.2327748,8.1067747],[-13.2332333,8.1065482],[-13.2333811,8.1063809],[-13.2336411,8.1061249],[-13.2338714,8.1059176],[-13.2340677,8.1058028],[-13.2343734,8.1057498],[-13.2348348,8.1058029],[-13.2352639,8.1058931],[-13.2356555,8.1058453],[-13.2358486,8.1057658],[-13.2359625,8.1055998],[-13.2360954,8.1054576],[-13.2362027,8.1051868],[-13.2363367,8.1049426],[-13.2364172,8.1045496],[-13.2365621,8.1040396],[-13.2364935,8.1034815],[-13.2364437,8.1033655],[-13.2363078,8.1032548],[-13.2362368,8.1030927],[-13.2362073,8.1028141],[-13.236326,8.1024942],[-13.2363617,8.1021583],[-13.2365284,8.1017663],[-13.2367769,8.1014889],[-13.2370877,8.1013152],[-13.2375499,8.1013377],[-13.2377423,8.101379],[-13.2382812,8.1014796],[-13.2385362,8.1017241],[-13.2394589,8.1018781],[-13.2399094,8.1017242],[-13.2402421,8.101517],[-13.2403318,8.1013131],[-13.2403923,8.1011081],[-13.2404781,8.1008106],[-13.2405565,8.100619],[-13.2406766,8.1002317],[-13.2406796,8.0998888],[-13.2406176,8.0996104],[-13.240344,8.0993023],[-13.2401938,8.0991165],[-13.2401669,8.0988669],[-13.2401937,8.0985642],[-13.2399256,8.098118],[-13.2397164,8.0979799],[-13.2393522,8.0978181]]],[[[-13.2369953,8.1019154],[-13.2370328,8.1019486],[-13.2371294,8.1019619],[-13.2372716,8.1018888],[-13.2373681,8.1018317],[-13.237458,8.1018117],[-13.2374767,8.101768],[-13.2374486,8.1016618],[-13.2373601,8.1015634],[-13.2371938,8.101533],[-13.2370382,8.1015901],[-13.2369537,8.1016552],[-13.2369524,8.1017468],[-13.2369685,8.1018145],[-13.2369953,8.1019154]]],[[[-13.2189119,8.1117233],[-13.2186515,8.1117261],[-13.218189,8.1117244],[-13.2177062,8.1117669],[-13.2171066,8.1118763],[-13.2166387,8.111958],[-13.2162739,8.1119315],[-13.2159734,8.1118147],[-13.2156784,8.1116925],[-13.2155335,8.1114641],[-13.2153618,8.1112517],[-13.2152171,8.1112623],[-13.2142836,8.1114057],[-13.2136184,8.1114801],[-13.2132483,8.1115597],[-13.2131732,8.1115491],[-13.213007,8.1114588],[-13.2128031,8.1113159],[-13.2127118,8.111172],[-13.2125954,8.1111416],[-13.212449,8.1111774],[-13.2122851,8.1113139],[-13.2118107,8.1115597],[-13.2114781,8.111565],[-13.2112313,8.1114004],[-13.2108128,8.1113368],[-13.2103784,8.1115332],[-13.2101476,8.1116713],[-13.2099171,8.1117562],[-13.2097668,8.1117031],[-13.2096327,8.1115119],[-13.2093377,8.1113579],[-13.2089997,8.1111349],[-13.2087262,8.1107578],[-13.2081162,8.1106527],[-13.2074591,8.1108525],[-13.2072027,8.111018],[-13.2069291,8.1111561],[-13.2065961,8.1114179],[-13.2063336,8.1120005],[-13.2062828,8.1131088],[-13.2064581,8.1134789],[-13.2067161,8.1137379],[-13.2069721,8.1142539],[-13.2069719,8.114555],[-13.206929,8.1152454],[-13.2069504,8.1157499],[-13.2070203,8.1165412],[-13.2071705,8.1173643],[-13.2072723,8.1177892],[-13.2073849,8.1183946],[-13.2075083,8.1189894],[-13.2075019,8.119479],[-13.2073367,8.1197754],[-13.2071829,8.1198587],[-13.2065581,8.1200499],[-13.2058179,8.1205329],[-13.2056772,8.120993],[-13.2057459,8.1215185],[-13.2057225,8.1218487],[-13.2057757,8.1222076],[-13.2058669,8.1227706],[-13.2058024,8.1229405],[-13.2056201,8.1230839],[-13.2055181,8.1231105],[-13.2050836,8.1230202],[-13.2049388,8.1230309],[-13.2048905,8.123052],[-13.2048529,8.1231795],[-13.2047296,8.1232698],[-13.2045472,8.1232911],[-13.2041915,8.1232551],[-13.2036674,8.1230627],[-13.2035135,8.1229977],[-13.2031793,8.1227175],[-13.2029594,8.1224094],[-13.2026106,8.1223564],[-13.2018651,8.12259],[-13.2015915,8.1227546],[-13.2014627,8.1229724],[-13.2013446,8.1232007],[-13.2013822,8.1234982],[-13.2015537,8.1237305],[-13.2016289,8.1242576],[-13.2018061,8.1244806],[-13.2022138,8.1245496],[-13.2023853,8.1246133],[-13.2024444,8.1247408],[-13.2022996,8.1252241],[-13.2021064,8.1256384],[-13.2020474,8.1260845],[-13.2021332,8.1264296],[-13.2022406,8.1265995],[-13.2021816,8.1268491],[-13.2018721,8.1272439],[-13.2015378,8.1274492],[-13.201071,8.1274918],[-13.2005776,8.1275766],[-13.2002556,8.1276563],[-13.2001162,8.1276722],[-13.199923,8.1276244],[-13.1997514,8.1275289],[-13.1995207,8.1274811],[-13.1986786,8.1275873],[-13.1984693,8.1275661],[-13.1981903,8.1276723],[-13.1979382,8.1278103],[-13.1978847,8.1279006],[-13.197847,8.1279855],[-13.1978793,8.1281555],[-13.1978363,8.1282404],[-13.1977023,8.1282564],[-13.1973239,8.1282895],[-13.19708,8.128336],[-13.1969541,8.1282529],[-13.1968546,8.1280441],[-13.196581,8.1279644],[-13.1964685,8.1280546],[-13.1962967,8.1282246],[-13.1961143,8.1282245],[-13.195932,8.1281449],[-13.195535,8.1278315],[-13.1952882,8.1280387],[-13.1951274,8.1282936],[-13.194843,8.1288246],[-13.1950736,8.1293769],[-13.1950308,8.1294672],[-13.1949288,8.1294778],[-13.1948161,8.1293875],[-13.1945963,8.1293716],[-13.194253,8.1294141],[-13.1939686,8.1294194],[-13.1936735,8.1293186],[-13.193416,8.1294778],[-13.1933281,8.1296539],[-13.1933463,8.1298496],[-13.1935395,8.1303647],[-13.1935877,8.1305611],[-13.1936575,8.1306461],[-13.1937057,8.130662],[-13.1939417,8.1306515],[-13.1940597,8.1307682],[-13.1941188,8.1310338],[-13.1939793,8.1313152],[-13.1939793,8.1315064],[-13.194033,8.1318516],[-13.1938934,8.1321702],[-13.1937557,8.1323466],[-13.1935665,8.1324095],[-13.1933338,8.1324801],[-13.1930561,8.1326159],[-13.1929261,8.1327449],[-13.1926793,8.1329659],[-13.1924825,8.1333348],[-13.192472,8.1334129],[-13.1924987,8.1336571],[-13.1924289,8.1338643],[-13.1922251,8.1340475],[-13.1920257,8.1343455],[-13.1919113,8.1347272],[-13.1918657,8.1349476],[-13.1919166,8.135083],[-13.1919649,8.1352795],[-13.1920723,8.1353698],[-13.1922761,8.1354494],[-13.1923351,8.1354813],[-13.1923941,8.1355609],[-13.1923538,8.1356273],[-13.1922976,8.1356618],[-13.1921795,8.1356592],[-13.1920081,8.1357029],[-13.1918604,8.1358079],[-13.1917183,8.1359008],[-13.191552,8.1360468],[-13.1914231,8.1361849],[-13.1913802,8.1363655],[-13.191407,8.1364504],[-13.1913722,8.1365142],[-13.1912918,8.1365301],[-13.1908626,8.1368169],[-13.1905086,8.1372842],[-13.190235,8.1376718],[-13.1900793,8.1380807],[-13.1900365,8.1382507],[-13.1899881,8.1383303],[-13.1899023,8.1383834],[-13.1897065,8.138394],[-13.1894812,8.1383967],[-13.1893365,8.1384047],[-13.1891702,8.1387074],[-13.1891942,8.138787],[-13.1892989,8.1388799],[-13.1893982,8.138933],[-13.1895886,8.1390472],[-13.1895795,8.1393149],[-13.1894447,8.1395445],[-13.1894491,8.139634],[-13.1895508,8.1397355],[-13.1895813,8.1397697],[-13.1897003,8.1399025],[-13.1897038,8.140019],[-13.1896556,8.1401836],[-13.1894357,8.1403881],[-13.1894625,8.1405607],[-13.1895537,8.1406164],[-13.1897522,8.1405155],[-13.1901492,8.1402872],[-13.1904441,8.1401146],[-13.1906534,8.1401093],[-13.1907901,8.1401544],[-13.1908653,8.1402023],[-13.1909082,8.1403191],[-13.1908867,8.1404306],[-13.1909216,8.1405501],[-13.191147,8.1408634],[-13.1911737,8.1409271],[-13.1911577,8.1410227],[-13.1910504,8.1412616],[-13.1911121,8.141482],[-13.1914044,8.1416042],[-13.1915332,8.1416387],[-13.1916887,8.1415404],[-13.1917343,8.1415165],[-13.1917853,8.1415245],[-13.191788,8.141721],[-13.1918604,8.1418458],[-13.1919838,8.1418591],[-13.1921033,8.1417549],[-13.1921678,8.1415009],[-13.1921742,8.1413386],[-13.1921179,8.1410758],[-13.1920911,8.1408315],[-13.1919032,8.1406616],[-13.191812,8.1405129],[-13.1917907,8.1404279],[-13.1918335,8.1403642],[-13.1921233,8.140189],[-13.1923808,8.1402314],[-13.1928046,8.1404757],[-13.1931157,8.1404332],[-13.1934805,8.1402633],[-13.1937809,8.140035],[-13.1940062,8.1398013],[-13.1941886,8.1394827],[-13.1942959,8.1391853],[-13.1944139,8.138872],[-13.1945158,8.1384738],[-13.1946258,8.1381206],[-13.1948913,8.1377382],[-13.1951837,8.1376081],[-13.1957067,8.1375975],[-13.1962914,8.1374435],[-13.1965865,8.1374807],[-13.1968976,8.1375391],[-13.1971282,8.1376293],[-13.1972141,8.1376665],[-13.1972301,8.1378046],[-13.1971765,8.1380223],[-13.1972034,8.1382188],[-13.1974271,8.1381759],[-13.1977053,8.1380312],[-13.1978302,8.1378155],[-13.1979329,8.1376293],[-13.1979169,8.1371673],[-13.197906,8.1369337],[-13.1978042,8.1368169],[-13.1974609,8.1368753],[-13.1973267,8.136785],[-13.1972999,8.1366416],[-13.197359,8.1361743],[-13.1974233,8.1359141],[-13.1974126,8.1356326],[-13.197316,8.1351945],[-13.1979579,8.1340759],[-13.1984104,8.1338058],[-13.1991453,8.1334341],[-13.1994296,8.133312],[-13.1996978,8.1330677],[-13.1999339,8.1325897],[-13.2000196,8.1324092],[-13.2000626,8.1323189],[-13.2001966,8.1322764],[-13.200363,8.132303],[-13.2006688,8.1324145],[-13.2011194,8.1324092],[-13.2013125,8.1323083],[-13.2015003,8.1321861],[-13.2018259,8.1318561],[-13.2018167,8.1317162],[-13.2017657,8.1315861],[-13.2015806,8.1314693],[-13.2012776,8.1314108],[-13.2012266,8.1313684],[-13.2012212,8.1313126],[-13.2012749,8.1312516],[-13.2014037,8.1311851],[-13.201586,8.1310471],[-13.2016289,8.1309435],[-13.2016343,8.1308002],[-13.201645,8.1306727],[-13.2016718,8.1306169],[-13.2017094,8.1306328],[-13.201755,8.1306727],[-13.2019186,8.130848],[-13.2021869,8.1309116],[-13.202498,8.1307471],[-13.2027662,8.1305772],[-13.2030506,8.1303965],[-13.2031472,8.1302],[-13.2032275,8.1300195],[-13.2031886,8.1298507],[-13.2029916,8.129584],[-13.2026965,8.1291857],[-13.2022674,8.1286759],[-13.2022566,8.1286175],[-13.2023425,8.1285485],[-13.2030345,8.1284051],[-13.2033135,8.1283626],[-13.2036085,8.1282882],[-13.2039572,8.128182],[-13.2046867,8.1279749],[-13.2051642,8.12772],[-13.2054539,8.127497],[-13.2057501,8.1272609],[-13.205942,8.1269925],[-13.2061351,8.1265729],[-13.2061888,8.1263871],[-13.2061781,8.1258879],[-13.2064041,8.1255889],[-13.2065374,8.1254471],[-13.2065106,8.1252719],[-13.2062961,8.1249585],[-13.2061244,8.1246983],[-13.2061672,8.124608],[-13.2062853,8.1245602],[-13.2065643,8.1247249],[-13.2068218,8.1249267],[-13.2070235,8.1250584],[-13.2070792,8.1250488],[-13.2071489,8.1249585],[-13.2071007,8.1247727],[-13.2069666,8.1244965],[-13.2069054,8.1241426],[-13.2069767,8.1240773],[-13.2070802,8.124066],[-13.2074011,8.1245071],[-13.2075512,8.1245549],[-13.2077659,8.1245549],[-13.208032,8.1243572],[-13.2083775,8.1242469],[-13.2086081,8.1241809],[-13.2088549,8.1241301],[-13.2092948,8.1239867],[-13.2096058,8.1239283],[-13.2096756,8.1238486],[-13.2097077,8.1237105],[-13.2096596,8.1235618],[-13.2095951,8.1234238],[-13.2095897,8.12336],[-13.2096541,8.1232857],[-13.2097883,8.123222],[-13.2099653,8.1231051],[-13.210373,8.1227865],[-13.2108934,8.1225528],[-13.2112021,8.1223889],[-13.2114513,8.122197],[-13.2115747,8.122043],[-13.2118053,8.1217987],[-13.2119931,8.121581],[-13.2122291,8.1213314],[-13.2126475,8.1210074],[-13.212948,8.1207578],[-13.2132859,8.1205189],[-13.2136291,8.1203171],[-13.2139994,8.1200993],[-13.2144661,8.1200622],[-13.214965,8.1200887],[-13.2152815,8.1201259],[-13.2155765,8.1201418],[-13.2160218,8.1200568],[-13.2164134,8.1199878],[-13.2169766,8.1198816],[-13.21732,8.1196957],[-13.2175667,8.1195523],[-13.2178725,8.1192656],[-13.2181111,8.1190321],[-13.2185216,8.1186442],[-13.2188756,8.1183999],[-13.2191385,8.1182034],[-13.2193369,8.1180122],[-13.2194656,8.1177573],[-13.2194549,8.1175078],[-13.219219,8.1169395],[-13.2188917,8.1167271],[-13.2187414,8.1165253],[-13.218677,8.1162703],[-13.2187146,8.1158455],[-13.2188542,8.1155162],[-13.2190366,8.1153197],[-13.2195408,8.1146346],[-13.2196748,8.1142363],[-13.2197715,8.1137106],[-13.21975,8.1133282],[-13.219337,8.1129618],[-13.2191331,8.1125039],[-13.2191331,8.1122076],[-13.2191707,8.1120377],[-13.2191814,8.1118996],[-13.2189119,8.1117233]]],[[[-13.1847713,8.2819984],[-13.1848545,8.2824735],[-13.184833,8.2825584],[-13.1847204,8.2826194],[-13.1846453,8.2827336],[-13.1846292,8.2828371],[-13.1846667,8.2830096],[-13.1847284,8.2831265],[-13.184892,8.2831928],[-13.1850852,8.2831874],[-13.1854043,8.2831477],[-13.1856833,8.2830839],[-13.1858013,8.2829593],[-13.1858764,8.2827496],[-13.1859836,8.2825797],[-13.1860721,8.2824231],[-13.1861178,8.2823196],[-13.1860964,8.2821657],[-13.1859997,8.2819985],[-13.1858362,8.2818019],[-13.1857182,8.2816269],[-13.1856564,8.2815578],[-13.1855653,8.281534],[-13.1854982,8.2815738],[-13.1854312,8.2816481],[-13.1853855,8.2816614],[-13.1852836,8.2815949],[-13.1852084,8.2815313],[-13.1851173,8.2815101],[-13.1850342,8.2815446],[-13.184892,8.2816481],[-13.1848062,8.2817966],[-13.1847713,8.2819984]]],[[[-13.1630776,8.2020393],[-13.1630133,8.2021243],[-13.1630535,8.2022862],[-13.1631742,8.2026499],[-13.1633324,8.2028783],[-13.163724,8.2032181],[-13.1640003,8.2033614],[-13.1645233,8.2035207],[-13.1650641,8.2034789],[-13.165261,8.2034304],[-13.1653682,8.2032128],[-13.1653226,8.2027827],[-13.1651456,8.2025597],[-13.1648506,8.2023845],[-13.1644697,8.2022597],[-13.1640405,8.20218],[-13.1634504,8.2020421],[-13.1630776,8.2020393]]]]}]}
