# Supplementary material
Source: ML conference proceedings conference paper supplement (https://proceedings.neurips.cc/paper_files/paper/2022/hash/9d3faa41886997cfc2128b930077fa49-Abstract.html)
Supplement: Supplementary file 1 [file 9d3faa41886997cfc2128b930077fa49-Supplemental-Conference.zip › code/ebola/map/geojson/yomou.geojson]

{"type":"GeometryCollection","geometries":[{"type":"MultiPolygon","coordinates":[[[[-9.4809892,7.3658751],[-9.4809772,7.3661272],[-9.4817229,7.3669383],[-9.4821389,7.3670154],[-9.4823192,7.3670423],[-9.4821032,7.3685109],[-9.4821735,7.3692851],[-9.4821104,7.3697402],[-9.4820244,7.3705542],[-9.4813761,7.3719518],[-9.4808459,7.3728039],[-9.480836,7.3736069],[-9.4814106,7.3745658],[-9.4821598,7.3752017],[-9.4827861,7.3754195],[-9.4837712,7.3756007],[-9.4841374,7.3757998],[-9.4843338,7.376135],[-9.4844362,7.3765486],[-9.48436,7.3772027],[-9.4843266,7.37758],[-9.484128,7.3779709],[-9.4835147,7.3784904],[-9.4820633,7.3791784],[-9.4796492,7.3802821],[-9.4787298,7.3814189],[-9.4782321,7.3823446],[-9.4775236,7.3841776],[-9.4768579,7.385564],[-9.4768849,7.3866465],[-9.4767125,7.3874809],[-9.4764949,7.3880284],[-9.476081,7.3885156],[-9.4758069,7.3901506],[-9.4760669,7.3910108],[-9.476134,7.3916974],[-9.4759351,7.3929381],[-9.4757116,7.393757],[-9.4750813,7.3944173],[-9.4744895,7.3948209],[-9.4739809,7.3952398],[-9.4735648,7.396851],[-9.4737364,7.3984109],[-9.4735083,7.3994156],[-9.4729308,7.4007898],[-9.4721965,7.4023099],[-9.4718572,7.4033373],[-9.4713136,7.4044081],[-9.4707181,7.404926],[-9.4703417,7.4053201],[-9.4698785,7.4058031],[-9.4701391,7.4067749],[-9.4700734,7.4079023],[-9.470355,7.4087322],[-9.4702901,7.409194],[-9.4707181,7.4103908],[-9.4706829,7.4108127],[-9.4708244,7.4114664],[-9.4714088,7.4121297],[-9.4718047,7.4127345],[-9.4719249,7.4131294],[-9.4717989,7.4135212],[-9.4715569,7.4140693],[-9.4710549,7.4146403],[-9.4707184,7.415191],[-9.4705116,7.4163198],[-9.4702486,7.4171194],[-9.4698427,7.4178647],[-9.4693879,7.4183571],[-9.4687537,7.4185316],[-9.4676988,7.4185472],[-9.466527,7.4184471],[-9.466116,7.418622],[-9.4658334,7.4189099],[-9.4656821,7.4193134],[-9.4657217,7.4197562],[-9.4660893,7.4202208],[-9.4668482,7.4209804],[-9.4681297,7.4216509],[-9.4687568,7.4221081],[-9.468893,7.422574],[-9.468898,7.4230931],[-9.4688363,7.4239632],[-9.468536,7.425298],[-9.4681522,7.4289229],[-9.4680571,7.4297827],[-9.467676,7.4304644],[-9.4667247,7.4312243],[-9.4660289,7.4318616],[-9.4651654,7.4327872],[-9.4645916,7.4331606],[-9.4640745,7.4336445],[-9.4641111,7.4339025],[-9.4642351,7.4347762],[-9.463869,7.4353573],[-9.4637406,7.4362953],[-9.4635979,7.4369589],[-9.4630816,7.4375535],[-9.4625195,7.4379814],[-9.4621217,7.4383418],[-9.4617082,7.4387355],[-9.4611339,7.439254],[-9.4601855,7.4401103],[-9.459568,7.4408253],[-9.4593998,7.4411229],[-9.4594793,7.4415651],[-9.459754,7.4420125],[-9.4598392,7.4428072],[-9.459842,7.4434252],[-9.4597894,7.4436826],[-9.4597489,7.4440431],[-9.4594563,7.4446415],[-9.4592517,7.4450581],[-9.4586001,7.4455529],[-9.4578862,7.4462071],[-9.4579789,7.4472706],[-9.4576773,7.4480511],[-9.4569847,7.4488237],[-9.4564479,7.4501205],[-9.4564596,7.4505763],[-9.4563088,7.4507869],[-9.4560483,7.4508146],[-9.4558046,7.4507481],[-9.455616,7.4506966],[-9.4553299,7.4506583],[-9.4549408,7.4506575],[-9.4545739,7.4506307],[-9.4542645,7.4505276],[-9.4538882,7.4503914],[-9.4534372,7.4502362],[-9.453045,7.4504445],[-9.4526613,7.4509405],[-9.4518995,7.4520063],[-9.4514328,7.4521563],[-9.4508445,7.4520609],[-9.4492273,7.4515448],[-9.449031,7.451373],[-9.4488766,7.4510328],[-9.448786,7.450538],[-9.4485749,7.4504284],[-9.4479124,7.4503687],[-9.4474284,7.4504966],[-9.4472114,7.4507255],[-9.4470765,7.4509734],[-9.4467867,7.452009],[-9.4467654,7.4531329],[-9.4467975,7.4537504],[-9.4467983,7.4540453],[-9.4467398,7.454467],[-9.446216,7.4546313],[-9.4457676,7.4547142],[-9.4452691,7.4547531],[-9.4447709,7.4547516],[-9.4439978,7.4546588],[-9.4430717,7.4548166],[-9.4422493,7.4551111],[-9.4415177,7.4556461],[-9.4411981,7.4562199],[-9.4410959,7.4568261],[-9.4412909,7.4579779],[-9.441329,7.4582927],[-9.4411364,7.4586234],[-9.4402262,7.4590817],[-9.4400083,7.4591914],[-9.4396659,7.4598894],[-9.4391444,7.4608315],[-9.43882,7.4616108],[-9.4383026,7.46181],[-9.4379739,7.4618197],[-9.4377771,7.4618022],[-9.4376648,7.4616496],[-9.4373063,7.4614216],[-9.4368549,7.462306],[-9.4365457,7.4629207],[-9.4362589,7.4631614],[-9.4359024,7.4635248],[-9.4355692,7.4638502],[-9.4354989,7.4640781],[-9.4354077,7.4647197],[-9.4352725,7.4653031],[-9.4350073,7.4659057],[-9.4344909,7.4659206],[-9.4341084,7.4664842],[-9.4335434,7.4666665],[-9.4331751,7.4672718],[-9.4322902,7.4671949],[-9.4313421,7.4666765],[-9.4306227,7.4666392],[-9.430199,7.4668912],[-9.4297444,7.4673945],[-9.4288136,7.4687602],[-9.4285396,7.4694923],[-9.4278927,7.4700477],[-9.4256072,7.471902],[-9.4248967,7.4728941],[-9.4247691,7.4734219],[-9.4248718,7.4739198],[-9.4252416,7.4746634],[-9.4256699,7.4756879],[-9.4258188,7.4761721],[-9.4257696,7.4766672],[-9.4255516,7.4770996],[-9.4251314,7.477727],[-9.4242657,7.4785335],[-9.4234462,7.4794234],[-9.42231,7.4813349],[-9.4218302,7.4819353],[-9.4213102,7.4824706],[-9.4204731,7.4838943],[-9.4196451,7.4856489],[-9.4189601,7.4872634],[-9.4184176,7.489465],[-9.4184521,7.4902968],[-9.4183432,7.4915173],[-9.4181506,7.4920542],[-9.4179778,7.4924659],[-9.4178186,7.4926813],[-9.417432,7.4928483],[-9.416759,7.4932682],[-9.4165126,7.493554],[-9.416298,7.493903],[-9.4161173,7.494303],[-9.4159816,7.4956406],[-9.4150411,7.4970846],[-9.4156241,7.4975255],[-9.4163333,7.496989],[-9.4167781,7.4971636],[-9.4168136,7.497078],[-9.4168337,7.4973251],[-9.4171255,7.4974376],[-9.4171579,7.4975686],[-9.4171428,7.4977868],[-9.4170752,7.4979619],[-9.4167609,7.4982743],[-9.4164149,7.4990517],[-9.4160855,7.4996069],[-9.4160402,7.4997684],[-9.4159869,7.4999586],[-9.4151982,7.5021418],[-9.4146319,7.5039145],[-9.4138696,7.5059381],[-9.4134081,7.5075428],[-9.4130312,7.5078875],[-9.4124254,7.5091245],[-9.4105747,7.5089953],[-9.4096372,7.5089298],[-9.4085905,7.5111917],[-9.4086173,7.5137995],[-9.4068458,7.5162742],[-9.4063358,7.5192545],[-9.4049213,7.5241993],[-9.4041575,7.5263631],[-9.4037433,7.5281851],[-9.403276,7.5298984],[-9.4033565,7.5325859],[-9.400914,7.536524],[-9.4008067,7.5402492],[-9.4002999,7.5407952],[-9.399786,7.5420221],[-9.3993559,7.5424844],[-9.3988805,7.5424306],[-9.3982919,7.5415509],[-9.3974453,7.5415957],[-9.3959908,7.5420952],[-9.3952506,7.5430165],[-9.3944723,7.5448525],[-9.3946065,7.546582],[-9.3912245,7.5529945],[-9.3903656,7.5553892],[-9.3871716,7.5574114],[-9.3845949,7.5637706],[-9.3834294,7.5648605],[-9.3836286,7.5662716],[-9.3849438,7.569358],[-9.3846323,7.5705828],[-9.3845843,7.5717348],[-9.3845144,7.5745729],[-9.3837365,7.5771726],[-9.3817298,7.5793841],[-9.3791556,7.5807378],[-9.3777237,7.5819162],[-9.376999,7.5835626],[-9.3776842,7.5858719],[-9.3787369,7.5866466],[-9.3785612,7.5884487],[-9.3778326,7.5894062],[-9.3769542,7.590407],[-9.3762206,7.5919732],[-9.3741539,7.592931],[-9.3719529,7.5932768],[-9.3708327,7.5955222],[-9.3702083,7.5963174],[-9.3690642,7.5973721],[-9.3682569,7.5981843],[-9.3679042,7.5992813],[-9.3682841,7.5999435],[-9.3683224,7.6005288],[-9.3680622,7.600859],[-9.3671386,7.6009308],[-9.3664335,7.6012837],[-9.3661324,7.601761],[-9.3662073,7.6029304],[-9.3673095,7.6053555],[-9.3666385,7.6075104],[-9.3659943,7.6084416],[-9.3660748,7.6101709],[-9.3654307,7.610703],[-9.3645838,7.611144],[-9.3643497,7.6124192],[-9.3639803,7.613648],[-9.3629377,7.6139233],[-9.35918,7.6130719],[-9.3589653,7.6177542],[-9.3585358,7.6197761],[-9.3599315,7.6220108],[-9.3583211,7.625416],[-9.3589653,7.6277571],[-9.3647629,7.62797],[-9.3672697,7.626557],[-9.3688265,7.626557],[-9.369578,7.6275679],[-9.3694706,7.6285256],[-9.3686117,7.6300154],[-9.3689874,7.6307337],[-9.3711884,7.6298824],[-9.372101,7.6304676],[-9.3713225,7.6326225],[-9.3714836,7.6338728],[-9.3724498,7.6341122],[-9.3733087,7.634192],[-9.3739261,7.6359744],[-9.375456,7.6377568],[-9.3762075,7.6389805],[-9.3758854,7.6409757],[-9.3760196,7.643423],[-9.3773348,7.6453917],[-9.3787307,7.6469079],[-9.3782207,7.6483976],[-9.3766102,7.6514568],[-9.3765296,7.6527603],[-9.3783279,7.6564047],[-9.3796968,7.6575219],[-9.379831,7.6585594],[-9.3796163,7.659384],[-9.3783011,7.6600756],[-9.3772543,7.6612727],[-9.3758586,7.6615121],[-9.374946,7.6626826],[-9.3746449,7.6632795],[-9.3740066,7.6645446],[-9.3735771,7.6657683],[-9.372262,7.6667791],[-9.3722351,7.6677899],[-9.3728793,7.6683485],[-9.3751339,7.6681623],[-9.3757781,7.6689869],[-9.3758586,7.6755306],[-9.3739798,7.6802122],[-9.3750534,7.6818614],[-9.3753486,7.6840958],[-9.3745166,7.6865962],[-9.3747313,7.691251],[-9.3737919,7.6927406],[-9.3736845,7.6948685],[-9.3723962,7.6982732],[-9.3716983,7.6992307],[-9.3704636,7.7012522],[-9.3687727,7.7029811],[-9.3676185,7.7033801],[-9.3670549,7.7071571],[-9.3657934,7.7093647],[-9.3641829,7.7107212],[-9.3626883,7.7142548],[-9.362903,7.7174465],[-9.356998,7.7214893],[-9.3562465,7.7236171],[-9.356998,7.726064],[-9.3562465,7.7293621],[-9.3550655,7.7309579],[-9.3547434,7.7324473],[-9.356676,7.7353197],[-9.3492241,7.7464729],[-9.3463691,7.7513836],[-9.3423967,7.7497879],[-9.3418599,7.7481922],[-9.3392832,7.7489369],[-9.3370286,7.7529794],[-9.3358476,7.752873],[-9.3349887,7.7508517],[-9.3361697,7.7468092],[-9.3285469,7.7413836],[-9.3260776,7.742022],[-9.3224273,7.7467028],[-9.3193137,7.7482986],[-9.3146972,7.7486177],[-9.3138383,7.7507453],[-9.3131941,7.7546815],[-9.3122278,7.7570218],[-9.3131941,7.7594686],[-9.3150192,7.7632982],[-9.3157708,7.7653194],[-9.3148045,7.7669151],[-9.3123352,7.7678725],[-9.3095437,7.7673406],[-9.3076649,7.7706915],[-9.3062692,7.7735104],[-9.3057861,7.7802121],[-9.3044977,7.7826055],[-9.3040146,7.7863286],[-9.3025115,7.7887219],[-9.3024041,7.7899984],[-9.3043903,7.7910089],[-9.3047661,7.7930832],[-9.3028336,7.7977635],[-9.3025115,7.8004227],[-9.2967557,7.8044471],[-9.2956844,7.8051331],[-9.2945423,7.8058226],[-9.293825,7.8060029],[-9.2932426,7.8059086],[-9.2928924,7.8061202],[-9.2926746,7.8063953],[-9.2925165,7.8068523],[-9.2926404,7.8072669],[-9.2928625,7.8076012],[-9.2932213,7.8080244],[-9.2936911,7.8081556],[-9.2943958,7.8081894],[-9.2945154,7.8086718],[-9.2948614,7.8091457],[-9.2948827,7.809552],[-9.2948827,7.8104067],[-9.2948699,7.8108003],[-9.2944428,7.8111938],[-9.2940243,7.8115154],[-9.2937594,7.8118539],[-9.2932298,7.812294],[-9.2928155,7.8125563],[-9.2926233,7.8129837],[-9.2919955,7.8134026],[-9.2912352,7.8136819],[-9.2906586,7.8141389],[-9.2902742,7.8144351],[-9.2897446,7.8146001],[-9.2893773,7.8148202],[-9.2892406,7.815438],[-9.2889373,7.815823],[-9.288822,7.8162885],[-9.2888818,7.8170248],[-9.2888989,7.8176849],[-9.2891722,7.8183281],[-9.2888989,7.8187427],[-9.2886578,7.8190485],[-9.2864699,7.820386],[-9.2823772,7.8201179],[-9.2802299,7.8226706],[-9.2774385,7.8219261],[-9.2715337,7.8242661],[-9.2670243,7.8257552],[-9.2638035,7.828946],[-9.2618709,7.8297969],[-9.2628372,7.832775],[-9.2605827,7.8332005],[-9.2575764,7.8316051],[-9.254785,7.8325623],[-9.2525304,7.8342641],[-9.2536004,7.8382999],[-9.2503408,7.8401295],[-9.2462894,7.8437141],[-9.2460716,7.8441838],[-9.2458196,7.8444546],[-9.2451063,7.8452585],[-9.2448073,7.8455378],[-9.2442563,7.8459397],[-9.2437737,7.8463544],[-9.2432825,7.8468748],[-9.2428511,7.8473149],[-9.2425009,7.8478903],[-9.2421635,7.8482203],[-9.241715,7.8482626],[-9.2413733,7.8483092],[-9.2407668,7.8482965],[-9.2401475,7.8483515],[-9.2394898,7.8484023],[-9.2392164,7.8486519],[-9.2389174,7.8490412],[-9.2386014,7.8493881],[-9.2382597,7.8498578],[-9.2380589,7.8504036],[-9.2378497,7.8508351],[-9.2375464,7.8514867],[-9.2373798,7.8517829],[-9.2371492,7.8519141],[-9.2370381,7.8520833],[-9.2367392,7.8522906],[-9.2364658,7.8526334],[-9.2360729,7.8530057],[-9.2356586,7.8535007],[-9.2354066,7.8537588],[-9.2353052,7.8540583],[-9.2355902,7.8542242],[-9.2358892,7.8543892],[-9.2358337,7.854677],[-9.2355561,7.8549689],[-9.2351717,7.8551255],[-9.234689,7.855282],[-9.2342704,7.8552016],[-9.2339074,7.8553116],[-9.2334846,7.8555486],[-9.2330532,7.8557516],[-9.2325107,7.8558193],[-9.2321861,7.8559336],[-9.2319939,7.8562509],[-9.231712,7.8564625],[-9.2312379,7.8564878],[-9.2306699,7.8566402],[-9.2302513,7.8568983],[-9.2256898,7.8593644],[-9.2235425,7.8636186],[-9.2175302,7.8686171],[-9.2123194,7.8715224],[-9.1939831,7.8669522],[-9.1787336,7.8690798],[-9.1460869,7.8784411],[-9.1220315,7.8812068],[-9.093036,7.8767391],[-9.080364,7.872484],[-9.0567381,7.8486545],[-9.0498651,7.8318454],[-9.0539459,7.809716],[-9.0608993,7.7983586],[-9.0618928,7.7967357],[-9.0619673,7.7945941],[-9.0623224,7.7843934],[-9.0346156,7.7865214],[-9.0112045,7.7852446],[-9.008122,7.7842265],[-8.9802761,7.77503],[-8.9683532,7.7701206],[-8.963738,7.7682202],[-8.9579389,7.7569411],[-8.956865,7.7473643],[-8.9523546,7.7301255],[-8.9532478,7.6954593],[-8.9533247,7.6924725],[-8.9536433,7.6801077],[-8.9510659,7.6688263],[-8.9338834,7.6513714],[-8.9078949,7.6130533],[-8.8838395,7.5817577],[-8.8705231,7.5642993],[-8.8539849,7.541943],[-8.8404537,7.5255476],[-8.807807,7.4989304],[-8.7994306,7.4863666],[-8.7959941,7.4759319],[-8.7992158,7.4648581],[-8.8035114,7.4510154],[-8.8133913,7.4375983],[-8.8110287,7.4275884],[-8.8140803,7.4079581],[-8.8142039,7.4079949],[-8.8143758,7.4078647],[-8.8146491,7.4072603],[-8.8155712,7.4064024],[-8.8157457,7.4061121],[-8.8158552,7.4055914],[-8.8157934,7.4050128],[-8.8156582,7.4047043],[-8.8153538,7.4043354],[-8.8152096,7.4040356],[-8.8153065,7.4035743],[-8.8155398,7.4030813],[-8.8159422,7.4025348],[-8.816277,7.4020486],[-8.8168484,7.4016059],[-8.8168991,7.4012304],[-8.8168011,7.4008716],[-8.8169397,7.4003485],[-8.8168354,7.3994458],[-8.8169402,7.3984298],[-8.8169803,7.3975217],[-8.8171054,7.3965191],[-8.8172035,7.3958518],[-8.8173257,7.3953146],[-8.8176875,7.3948116],[-8.8178397,7.3943018],[-8.8181677,7.3939263],[-8.8189183,7.3933562],[-8.8193174,7.392823],[-8.8204839,7.3922932],[-8.821008,7.3920954],[-8.8214664,7.3918912],[-8.8218371,7.3917306],[-8.8222829,7.3913954],[-8.8227354,7.3908932],[-8.8231113,7.390241],[-8.8235103,7.3893826],[-8.8237571,7.3882525],[-8.8242846,7.3872365],[-8.8247411,7.3855866],[-8.8248527,7.3844867],[-8.825113,7.3839804],[-8.8259449,7.3837456],[-8.8266752,7.3836853],[-8.8275544,7.3834975],[-8.8278148,7.3833332],[-8.8278587,7.3828638],[-8.8280041,7.3823709],[-8.8282205,7.3822501],[-8.8285216,7.3814173],[-8.8285012,7.3809053],[-8.8282617,7.3805717],[-8.8279703,7.3798222],[-8.8280447,7.3793427],[-8.8287379,7.3789235],[-8.8293634,7.3785379],[-8.8302392,7.3783836],[-8.8305312,7.3782537],[-8.8308534,7.3778407],[-8.8309459,7.3772837],[-8.8309662,7.3765996],[-8.8311441,7.3757801],[-8.8312403,7.3751877],[-8.8314745,7.3743236],[-8.8318387,7.3734995],[-8.8322087,7.3727945],[-8.8333659,7.3712295],[-8.8342793,7.3703759],[-8.8353743,7.3697641],[-8.8359163,7.3693543],[-8.8361857,7.3688563],[-8.8365965,7.3684539],[-8.8371004,7.3681488],[-8.8373929,7.3680918],[-8.8375281,7.3675351],[-8.8376608,7.3664995],[-8.8378097,7.3655112],[-8.8380092,7.364978],[-8.8383034,7.3646762],[-8.8389649,7.3642539],[-8.8399225,7.3637067],[-8.8403188,7.3633615],[-8.8407312,7.3628787],[-8.8414779,7.3614256],[-8.8418881,7.3602967],[-8.8420567,7.3597667],[-8.8427398,7.3577613],[-8.8429866,7.3570349],[-8.8431895,7.3566077],[-8.8435783,7.356383],[-8.8439401,7.3563058],[-8.8444372,7.3564401],[-8.8449005,7.3566145],[-8.8452386,7.3568827],[-8.8455722,7.3570837],[-8.8457988,7.3570703],[-8.8460321,7.3570434],[-8.846333,7.3568556],[-8.8471547,7.3558965],[-8.8475041,7.3554222],[-8.8483173,7.354433],[-8.8488076,7.3540004],[-8.848948,7.3539383],[-8.8490758,7.3537315],[-8.8492026,7.3535822],[-8.8492289,7.3534589],[-8.8494565,7.353193],[-8.8495899,7.352885],[-8.8500662,7.352268],[-8.8503789,7.3518131],[-8.8509791,7.3512795],[-8.8514411,7.3508003],[-8.8517136,7.35039],[-8.8521273,7.3498992],[-8.8527704,7.3496359],[-8.8535972,7.3489437],[-8.8536109,7.3485721],[-8.8535212,7.3479],[-8.8533634,7.3472455],[-8.8532553,7.3467644],[-8.8522997,7.3469718],[-8.8519495,7.3468293],[-8.8522205,7.3463728],[-8.852407,7.3457895],[-8.8519789,7.3453288],[-8.8518547,7.3450781],[-8.8510728,7.3454907],[-8.850664,7.3456426],[-8.8504034,7.3454339],[-8.8506042,7.3450378],[-8.8509437,7.3443524],[-8.8510513,7.3436552],[-8.8509605,7.3431312],[-8.8508129,7.3424999],[-8.8504894,7.3423108],[-8.850138,7.342287],[-8.8498343,7.3423297],[-8.8492844,7.3415447],[-8.8489233,7.3414167],[-8.8483061,7.3413523],[-8.848022,7.3412316],[-8.8472173,7.3413154],[-8.8466965,7.3411142],[-8.8467946,7.3408862],[-8.8471429,7.3406413],[-8.84741,7.3400176],[-8.847596,7.3395414],[-8.847853,7.3392932],[-8.8481776,7.3391524],[-8.8481573,7.338817],[-8.8473965,7.3386426],[-8.8471767,7.3382737],[-8.8471158,7.3379082],[-8.8471801,7.3375728],[-8.8488539,7.3372508],[-8.8487998,7.336892],[-8.8484752,7.3363755],[-8.8480387,7.3360922],[-8.8473501,7.3357987],[-8.8466071,7.3353236],[-8.8456029,7.3351102],[-8.8449525,7.3346809],[-8.8443595,7.3347141],[-8.8438742,7.3345671],[-8.8433577,7.3345647],[-8.8433219,7.3343323],[-8.8431019,7.3336351],[-8.8432143,7.3330779],[-8.8433142,7.3325939],[-8.8431519,7.3320975],[-8.8431316,7.3311786],[-8.8429422,7.3304475],[-8.8429118,7.3293642],[-8.8436033,7.328779],[-8.8443049,7.3284252],[-8.8448595,7.3279523],[-8.8452492,7.32721],[-8.8452097,7.3266136],[-8.8451032,7.3259727],[-8.8450364,7.3254184],[-8.844988,7.3247126],[-8.8448584,7.3239697],[-8.8448152,7.3233792],[-8.8448318,7.3230408],[-8.8449208,7.3227172],[-8.8450533,7.3223968],[-8.8453204,7.3220916],[-8.8456619,7.3217696],[-8.8459426,7.3213403],[-8.846257,7.3209748],[-8.8468488,7.3204616],[-8.8475014,7.3200223],[-8.8479264,7.3198314],[-8.8481811,7.3195863],[-8.8483153,7.3194075],[-8.8483129,7.3192811],[-8.8483163,7.3191369],[-8.8482926,7.3190396],[-8.8481777,7.3188786],[-8.8478903,7.3186875],[-8.8474101,7.3186506],[-8.8468116,7.3188652],[-8.846301,7.3191268],[-8.8456957,7.3194186],[-8.8453779,7.3196299],[-8.8450296,7.3197808],[-8.8447185,7.3198144],[-8.8441741,7.3198613],[-8.8432442,7.3197674],[-8.8428419,7.3195171],[-8.8426162,7.3192313],[-8.8425874,7.318998],[-8.8425511,7.3187478],[-8.8429433,7.3185869],[-8.8434065,7.3184862],[-8.8440374,7.318198],[-8.8443973,7.3178758],[-8.84459,7.3175673],[-8.8445156,7.3172353],[-8.8443094,7.3169871],[-8.8441302,7.3166014],[-8.8438174,7.3162693],[-8.8435418,7.315991],[-8.8431952,7.3158853],[-8.8426863,7.3160782],[-8.8421233,7.3163565],[-8.8416161,7.3165511],[-8.8409956,7.3166098],[-8.8405729,7.3165762],[-8.8402821,7.3164991],[-8.8398274,7.3165192],[-8.839217,7.3166685],[-8.8386215,7.3165788],[-8.8382134,7.3163216],[-8.8379733,7.3161264],[-8.8376853,7.3157835],[-8.8374788,7.3153597],[-8.8372388,7.3150168],[-8.8371475,7.3145882],[-8.8369411,7.3140025],[-8.8367875,7.3136265],[-8.8366489,7.3134823],[-8.8363697,7.3127833],[-8.8362769,7.3122179],[-8.8363124,7.3117249],[-8.8365001,7.3113207],[-8.8368365,7.3110641],[-8.837173,7.3108361],[-8.8377429,7.3106736],[-8.8384116,7.3101981],[-8.8389745,7.3099784],[-8.8396014,7.3097908],[-8.8403858,7.3097372],[-8.841008,7.3096164],[-8.8414003,7.3093347],[-8.841877,7.3086539],[-8.8421374,7.3079529],[-8.8422118,7.3074968],[-8.8420258,7.3068998],[-8.8416366,7.3067761],[-8.8411838,7.306893],[-8.8404535,7.307054],[-8.8397907,7.307054],[-8.8393714,7.3071077],[-8.838871,7.3070943],[-8.8385599,7.3067857],[-8.838338,7.3064483],[-8.838173,7.3061803],[-8.8381132,7.3057867],[-8.8379326,7.3055863],[-8.8379541,7.3053088],[-8.8381789,7.3048606],[-8.8384873,7.304538],[-8.8385638,7.3043317],[-8.8391975,7.30404],[-8.8403834,7.3040068],[-8.8411055,7.3039997],[-8.8416267,7.304002],[-8.842148,7.3042582],[-8.8427577,7.3046945],[-8.843243,7.3049744],[-8.8436328,7.3051878],[-8.8439149,7.3055199],[-8.8440655,7.3059088],[-8.8442783,7.3062788],[-8.8445437,7.3065373],[-8.8448928,7.3065847],[-8.8452562,7.306459],[-8.8455408,7.3062171],[-8.8456412,7.3058637],[-8.8455049,7.305712],[-8.8452036,7.3056218],[-8.8450387,7.3052234],[-8.8450339,7.3048036],[-8.8451152,7.3043341],[-8.8451176,7.3040827],[-8.8449478,7.303606],[-8.8445653,7.3033617],[-8.8441946,7.3033997],[-8.8437547,7.303568],[-8.8433076,7.3036131],[-8.8429274,7.3034234],[-8.8425209,7.3031672],[-8.8423727,7.302968],[-8.8423512,7.3027404],[-8.8424827,7.3024368],[-8.8426907,7.3019079],[-8.8428007,7.30173],[-8.8429322,7.3012794],[-8.843047,7.3007174],[-8.84298,7.3002834],[-8.8428294,7.2999679],[-8.8423942,7.2994723],[-8.8419089,7.2990169],[-8.8415885,7.298628],[-8.8411653,7.2983078],[-8.841029,7.2982746],[-8.840864,7.2980374],[-8.8406153,7.2978619],[-8.8403475,7.2975607],[-8.8399674,7.2972026],[-8.8398048,7.2968872],[-8.8393098,7.2966477],[-8.8389584,7.296382],[-8.8387719,7.2960121],[-8.8387934,7.2955211],[-8.8389225,7.2948832],[-8.8392859,7.2935052],[-8.8394916,7.2930428],[-8.8397067,7.2925115],[-8.8398143,7.2919376],[-8.8397952,7.2914609],[-8.8396757,7.2910008],[-8.8392477,7.2907755],[-8.8387121,7.2908395],[-8.8382769,7.2911383],[-8.8377437,7.2916174],[-8.8372201,7.2921036],[-8.8369571,7.2921724],[-8.8365124,7.2921605],[-8.8363378,7.2919328],[-8.8362781,7.2916506],[-8.8365411,7.2912854],[-8.8366702,7.2909676],[-8.8367371,7.2903912],[-8.8365482,7.2898932],[-8.8365698,7.2897058],[-8.8364287,7.289388],[-8.8364717,7.2889611],[-8.8364885,7.2883967],[-8.8363617,7.2880978],[-8.8360533,7.2876875],[-8.8361609,7.287384],[-8.8363665,7.2869357],[-8.8367084,7.2861673],[-8.8370695,7.2852874],[-8.8373806,7.2847105],[-8.8378269,7.2839793],[-8.8380129,7.2835969],[-8.8381435,7.2829206],[-8.8380837,7.2823229],[-8.8377753,7.2814098],[-8.8378375,7.280703],[-8.8379475,7.2801623],[-8.8379331,7.2795267],[-8.8376821,7.2789195],[-8.837448,7.2785049],[-8.8373258,7.2782981],[-8.8372134,7.2779495],[-8.8371728,7.2774917],[-8.8371321,7.2769415],[-8.8372852,7.2764553],[-8.8376486,7.2760971],[-8.8380527,7.2758339],[-8.83888,7.2756963],[-8.8391358,7.2755018],[-8.8394657,7.2753595],[-8.8399535,7.2748614],[-8.8404389,7.274361],[-8.8409147,7.2737799],[-8.8415005,7.2732605],[-8.8422991,7.2725751],[-8.8428705,7.2723165],[-8.8433416,7.2721766],[-8.8441449,7.2720841],[-8.8447068,7.2719632],[-8.8454552,7.2719608],[-8.8461223,7.2721221],[-8.8469257,7.2722098],[-8.8475401,7.2721932],[-8.8481283,7.2718422],[-8.8485181,7.2713536],[-8.8489341,7.2708081],[-8.8493214,7.2702934],[-8.8494697,7.2699519],[-8.8494912,7.2695297],[-8.849178,7.2691834],[-8.848738,7.2692688],[-8.8484894,7.2696483],[-8.8482407,7.270227],[-8.8481235,7.2705543],[-8.8479657,7.2710121],[-8.8475425,7.2713607],[-8.8470333,7.2714058],[-8.8465598,7.2711496],[-8.8463303,7.2707868],[-8.8461438,7.2703527],[-8.8459382,7.2696459],[-8.8457588,7.269136],[-8.8454504,7.2686],[-8.8451109,7.2681114],[-8.8450463,7.2679857],[-8.8452974,7.2677129],[-8.845393,7.2676157],[-8.8456441,7.2674568],[-8.8459764,7.2672149],[-8.8463423,7.2668496],[-8.8465407,7.2666219],[-8.8468587,7.2664298],[-8.8472867,7.2663681],[-8.8482748,7.2658745],[-8.8495124,7.2655558],[-8.8501211,7.2655525],[-8.8505066,7.2654485],[-8.8510746,7.265103],[-8.8516393,7.2645194],[-8.8521127,7.2637412],[-8.8524069,7.2633957],[-8.853073,7.2628959],[-8.8534281,7.2626745],[-8.8539928,7.2627718],[-8.8543005,7.262963],[-8.8547941,7.2633789],[-8.8553791,7.2639961],[-8.8558255,7.2647106],[-8.8563158,7.2653378],[-8.8567756,7.2659416],[-8.8571104,7.2663508],[-8.8573403,7.2669915],[-8.8574756,7.2676153],[-8.8576988,7.2677931],[-8.8581282,7.2678535],[-8.8589702,7.267508],[-8.8600218,7.2671558],[-8.8610768,7.266817],[-8.8619289,7.2666829],[-8.8624327,7.2665487],[-8.8626322,7.2661999],[-8.8625274,7.2657537],[-8.8621858,7.2653445],[-8.8616854,7.2647542],[-8.8612796,7.2642376],[-8.8610801,7.2638251],[-8.8609821,7.2631844],[-8.8610294,7.262745],[-8.8613371,7.2625236],[-8.8621588,7.2620238],[-8.8624631,7.2617555],[-8.8626829,7.2614268],[-8.863021,7.260558],[-8.8633457,7.2597463],[-8.8640828,7.2589882],[-8.8644345,7.2587467],[-8.8651817,7.2586595],[-8.8661623,7.2587366],[-8.8666884,7.2587936],[-8.8676926,7.2595336],[-8.8683429,7.2600459],[-8.8688785,7.2604728],[-8.869548,7.2606246],[-8.8700836,7.2604301],[-8.8703562,7.2599605],[-8.8705857,7.2590972],[-8.8708296,7.2583239],[-8.871083,7.2577689],[-8.871236,7.2571617],[-8.8713556,7.256436],[-8.8714656,7.2560707],[-8.871676,7.2559331],[-8.8719342,7.2560043],[-8.8720251,7.2564549],[-8.8721255,7.2572044],[-8.8725798,7.2574132],[-8.8733688,7.2575982],[-8.8737275,7.2576883],[-8.8745691,7.2580203],[-8.8753916,7.2583714],[-8.8761089,7.2587698],[-8.8767545,7.2589975],[-8.8775483,7.259026],[-8.878641,7.2589897],[-8.8796897,7.2590773],[-8.8806831,7.2594222],[-8.8817483,7.2600628],[-8.8823554,7.2603256],[-8.8831722,7.2606158],[-8.8837904,7.2611413],[-8.8843754,7.2616724],[-8.8851701,7.2623951],[-8.8856889,7.262625],[-8.8861498,7.2626332],[-8.8866024,7.2627509],[-8.8870217,7.2630048],[-8.8872812,7.2634298],[-8.887608,7.2635993],[-8.8881969,7.2637836],[-8.8889391,7.2637679],[-8.8896138,7.2639651],[-8.8901489,7.2641589],[-8.8905021,7.2642866],[-8.8910836,7.2642421],[-8.8915129,7.2641782],[-8.892036,7.2642516],[-8.8923683,7.2644991],[-8.8926627,7.2647953],[-8.8929202,7.2650685],[-8.8932863,7.265182],[-8.893511,7.2651518],[-8.8940183,7.2649951],[-8.8943071,7.2649776],[-8.8948204,7.2650541],[-8.8951302,7.2653508],[-8.8952906,7.2654422],[-8.8954955,7.2653996],[-8.8956769,7.2653861],[-8.8958526,7.2650609],[-8.8959657,7.2646873],[-8.8961433,7.2640679],[-8.8966487,7.2636653],[-8.8970362,7.2633477],[-8.8971576,7.2627592],[-8.8972514,7.2622172],[-8.8976885,7.2620585],[-8.8979734,7.2618997],[-8.8982036,7.2616558],[-8.8985666,7.2613655],[-8.8987968,7.2611874],[-8.8992066,7.2609242],[-8.8993393,7.2608041],[-8.8997608,7.2606958],[-8.9002758,7.2605766],[-8.9006375,7.2604333],[-8.9008975,7.2598034],[-8.9007048,7.2587962],[-8.9006847,7.2584982],[-8.9011213,7.2580597],[-8.902032,7.2576656],[-8.9025949,7.2574958],[-8.9035001,7.2569374],[-8.9042231,7.2564173],[-8.9046205,7.2561216],[-8.9050853,7.2558932],[-8.9054319,7.2560776],[-8.9054748,7.2563199],[-8.9055344,7.2566823],[-8.9057674,7.2578603],[-8.9056481,7.2585453],[-8.9056498,7.2591624],[-8.9059909,7.2595683],[-8.9062481,7.2601807],[-8.9062752,7.2608423],[-8.9061734,7.2618868],[-8.9059937,7.2623245],[-8.9054415,7.2630828],[-8.9052535,7.2634154],[-8.9052733,7.2637469],[-8.9053717,7.2640639],[-8.9055592,7.2641692],[-8.9064689,7.2641576],[-8.9080115,7.2641604],[-8.909176,7.2643],[-8.910037,7.2639687],[-8.910553,7.2638702],[-8.9108014,7.2639113],[-8.9109615,7.2640317],[-8.9110884,7.2642425],[-8.9108235,7.2645273],[-8.9106965,7.2650664],[-8.9108937,7.2654489],[-8.9112561,7.2660057],[-8.911276,7.2663147],[-8.9112899,7.2667477],[-8.9110387,7.2673218],[-8.9106966,7.2678631],[-8.9106717,7.2687291],[-8.9107122,7.2692181],[-8.9109509,7.2698467],[-8.911111,7.2703373],[-8.911225,7.270707],[-8.9110459,7.2710219],[-8.9105317,7.2714246],[-8.9099122,7.2720717],[-8.9090078,7.2726862],[-8.9086572,7.2728722],[-8.9085318,7.2735301],[-8.908489,7.2741149],[-8.9083346,7.2755293],[-8.9083723,7.2759348],[-8.9085742,7.276451],[-8.9089417,7.2764838],[-8.9101508,7.2762907],[-8.9114444,7.2762831],[-8.9116427,7.2762339],[-8.9116674,7.2759472],[-8.9117722,7.2747018],[-8.9117108,7.2740555],[-8.9117459,7.2737432],[-8.9119685,7.2736669],[-8.9122037,7.2737293],[-8.9125599,7.2739483],[-8.9132327,7.2742922],[-8.9140275,7.2749097],[-8.9145558,7.2753045],[-8.9149094,7.2754842],[-8.9149259,7.2757096],[-8.9148433,7.2759553],[-8.9146079,7.2762175],[-8.9138356,7.2767911],[-8.912942,7.2775197],[-8.9126751,7.2778357],[-8.9124934,7.2780733],[-8.9128646,7.2781834],[-8.9132972,7.2782356],[-8.9139171,7.2783637],[-8.9148227,7.2785034],[-8.9153182,7.27861],[-8.9157802,7.278695],[-8.916185,7.2788824],[-8.9164746,7.2791784],[-8.9166502,7.2795081],[-8.916805,7.2799372],[-8.9167843,7.2803628],[-8.9164498,7.2807361],[-8.9156207,7.2814161],[-8.9152315,7.2817725],[-8.9149414,7.2821601],[-8.9144666,7.2829419],[-8.9143407,7.2834424],[-8.9142899,7.2840994],[-8.9144283,7.2851327],[-8.9142306,7.2859023],[-8.9141444,7.2866137],[-8.914275,7.2873037],[-8.9146493,7.2877637],[-8.9149188,7.2882808],[-8.9149874,7.2892724],[-8.9149089,7.2898072],[-8.9145732,7.2904844],[-8.9146922,7.2910605],[-8.9149625,7.2914903],[-8.9152348,7.2921884],[-8.9151019,7.2932211],[-8.9153011,7.2934971],[-8.9157834,7.2939211],[-8.9160948,7.2941855],[-8.9163473,7.2945839],[-8.9164324,7.2950644],[-8.9165539,7.295292],[-8.9168237,7.2955084],[-8.9172137,7.2956001],[-8.9176461,7.2956277],[-8.9180892,7.2955012],[-8.9183929,7.2951652],[-8.9184804,7.2948413],[-8.9185236,7.2946364],[-8.918439,7.294444],[-8.9179974,7.2939956],[-8.9177116,7.2936975],[-8.9176416,7.2934555],[-8.9176665,7.2931147],[-8.9179977,7.2925522],[-8.9184817,7.2923162],[-8.918671,7.2922509],[-8.918713,7.2920619],[-8.9187614,7.2918273],[-8.91828,7.2912629],[-8.918206,7.2910839],[-8.9183313,7.290824],[-8.9194962,7.290611],[-8.9200395,7.2906476],[-8.9203753,7.2908033],[-8.920672,7.2910079],[-8.921104,7.2910179],[-8.9214436,7.2908722],[-8.9221537,7.2900666],[-8.9223647,7.2899071],[-8.9226941,7.2899204],[-8.9228594,7.2901637],[-8.922968,7.2904259],[-8.9231289,7.2909578],[-8.9233333,7.2911342],[-8.9236294,7.291134],[-8.9239189,7.2910433],[-8.9244098,7.2902713],[-8.9248204,7.2898111],[-8.925612,7.2895289],[-8.926234,7.2892969],[-8.92675,7.2893069],[-8.927341,7.2894429],[-8.927899,7.2896839],[-8.9281806,7.2898767],[-8.9285103,7.2898573],[-8.928858,7.289717],[-8.9292998,7.2891828],[-8.929911,7.2885569],[-8.930216,7.2877879],[-8.930646,7.2863049],[-8.930783,7.2860309],[-8.9310405,7.2857713],[-8.9317911,7.2856184],[-8.9324349,7.2856881],[-8.9338218,7.2861352],[-8.9343347,7.286275],[-8.9349517,7.2866244],[-8.935252,7.2870879],[-8.935516,7.2874249],[-8.935759,7.2878559],[-8.9360191,7.2879679],[-8.9365047,7.2879477],[-8.9371693,7.2877203],[-8.9380188,7.2874112],[-8.9387032,7.287171],[-8.9393894,7.2870071],[-8.9397926,7.2870171],[-8.9402069,7.2871239],[-8.940353,7.2875349],[-8.940491,7.2879869],[-8.940614,7.2885201],[-8.9405908,7.2892809],[-8.940503,7.2897959],[-8.940409,7.2902489],[-8.940473,7.2905009],[-8.940627,7.2905895],[-8.9408553,7.2905685],[-8.9411661,7.2903243],[-8.9417521,7.2897438],[-8.942389,7.2893939],[-8.942926,7.2891829],[-8.943885,7.2889609],[-8.9441421,7.2888117],[-8.9444273,7.2885569],[-8.9445305,7.2875741],[-8.9444685,7.2870252],[-8.9444107,7.2866278],[-8.9442249,7.2859396],[-8.9441381,7.285661],[-8.9441505,7.2852964],[-8.9446378,7.2846983],[-8.9447948,7.2844034],[-8.9448072,7.2841166],[-8.9444974,7.2837807],[-8.9440968,7.2835841],[-8.9427085,7.2826081],[-8.9422551,7.2823477],[-8.9416041,7.2821921],[-8.9406383,7.2821976],[-8.9400795,7.28177],[-8.9394868,7.2811835],[-8.9389536,7.2804128],[-8.9385174,7.2798398],[-8.9376036,7.2789483],[-8.9374493,7.2786579],[-8.9374683,7.2780209],[-8.9374002,7.2775201],[-8.9375592,7.2770951],[-8.9379309,7.2766609],[-8.9386041,7.2761283],[-8.9392112,7.2756244],[-8.9400909,7.275227],[-8.940827,7.2750893],[-8.9414454,7.2750514],[-8.9418873,7.2752188],[-8.942542,7.2753556],[-8.9431991,7.2756756],[-8.9436012,7.2761693],[-8.9439027,7.2765912],[-8.9443859,7.2773368],[-8.9446466,7.277745],[-8.9447824,7.2779759],[-8.9451169,7.2779636],[-8.9453317,7.2777956],[-8.9455051,7.277599],[-8.9456021,7.277283],[-8.9452501,7.276183],[-8.9447298,7.2748148],[-8.9440018,7.2735884],[-8.9437706,7.2732115],[-8.9436188,7.2724838],[-8.9435558,7.2695941],[-8.9435341,7.2680606],[-8.9433116,7.2671367],[-8.9432456,7.2664832],[-8.9434402,7.2657637],[-8.9436095,7.2654524],[-8.9438821,7.2652393],[-8.9442992,7.2651902],[-8.9451128,7.2656408],[-8.9458314,7.2658252],[-8.9464137,7.2658375],[-8.9469919,7.265735],[-8.9474709,7.2654811],[-8.9479376,7.2650222],[-8.9484568,7.2644061],[-8.9487677,7.2638408],[-8.9492427,7.2630804],[-8.9495359,7.262896],[-8.9499819,7.2628878],[-8.950556,7.262982],[-8.9509813,7.2631418],[-8.9514893,7.2632197],[-8.9517949,7.2632975],[-8.951894,7.2635023],[-8.9518858,7.2637195],[-8.9517743,7.2639939],[-8.9513076,7.2643012],[-8.9505477,7.2646453],[-8.9497672,7.2651083],[-8.9484952,7.2660546],[-8.9478798,7.2664438],[-8.9474751,7.2666978],[-8.9472108,7.2670296],[-8.9465639,7.2684435],[-8.9462196,7.2692828],[-8.9458314,7.270479],[-8.9457901,7.2707658],[-8.9459894,7.2709004],[-8.9464426,7.2708805],[-8.9473966,7.2707208],[-8.9487925,7.2706839],[-8.9490857,7.2703956],[-8.9491697,7.2698],[-8.9494811,7.2682023],[-8.9496433,7.2675704],[-8.9500433,7.2673438],[-8.9507625,7.2673696],[-8.9515719,7.2672099],[-8.9523272,7.2671535],[-8.9524956,7.267641],[-8.952479,7.2683446],[-8.952307,7.2685618],[-8.9521625,7.2686847],[-8.9517773,7.2687383],[-8.9509648,7.2691025],[-8.9503082,7.269377],[-8.9499943,7.2696761],[-8.949771,7.2700444],[-8.9496098,7.2704711],[-8.9497336,7.2723451],[-8.9497821,7.2727578],[-8.949827,7.2729703],[-8.9500284,7.273062],[-8.9502132,7.2729206],[-8.9510639,7.2726789],[-8.9515926,7.2725355],[-8.9520236,7.2724373],[-8.9524903,7.2724772],[-8.9531351,7.2724757],[-8.9544654,7.2730758],[-8.9562676,7.2742684],[-8.957808,7.274674],[-8.9587868,7.2744692],[-8.9594682,7.2741537],[-8.9599349,7.2737359],[-8.9604842,7.2733836],[-8.9613102,7.2731337],[-8.9619792,7.2725233],[-8.9623757,7.2720521],[-8.9626524,7.2716712],[-8.9631727,7.2706389],[-8.9641185,7.2692254],[-8.9646678,7.2686314],[-8.9651096,7.2681972],[-8.9655763,7.2678653],[-8.966043,7.2675827],[-8.9665675,7.267337],[-8.9672572,7.2670747],[-8.9674224,7.2666568],[-8.9677321,7.2659727],[-8.9675587,7.2656408],[-8.9670466,7.2655302],[-8.9664519,7.2654443],[-8.9658778,7.2654607],[-8.9653161,7.2653622],[-8.9640689,7.2649894],[-8.9634123,7.2647847],[-8.9629621,7.2645388],[-8.9621114,7.2639161],[-8.9619255,7.2637645],[-8.9614836,7.2636684],[-8.9611774,7.2635249],[-8.9609581,7.2634117],[-8.9606624,7.2631051],[-8.9605365,7.2627138],[-8.9605509,7.2624476],[-8.9605158,7.262292],[-8.9607099,7.2620522],[-8.9612861,7.2614664],[-8.9614802,7.2611509],[-8.9617878,7.2608007],[-8.9621409,7.2604914],[-8.962492,7.2602906],[-8.9628224,7.2604422],[-8.9632808,7.2606839],[-8.9635265,7.2606696],[-8.9637351,7.2605917],[-8.9639189,7.2604053],[-8.964051,7.260094],[-8.9641295,7.2595942],[-8.9641728,7.2591313],[-8.9641233,7.2578654],[-8.9641543,7.2573962],[-8.9641708,7.2572016],[-8.9642348,7.2570502],[-8.9643711,7.2570419],[-8.9645879,7.2571033],[-8.9648419,7.2573368],[-8.9652363,7.2578327],[-8.9655997,7.2580621],[-8.9658909,7.2583139],[-8.9663534,7.2585413],[-8.9673116,7.2586273],[-8.9678691,7.2585249],[-8.96828,7.2583037],[-8.9686662,7.2579432],[-8.968916,7.2575294],[-8.9690833,7.2569948],[-8.968824,7.2565073],[-8.9683812,7.2562717],[-8.9681272,7.2559828],[-8.9678071,7.2557247],[-8.9676667,7.2555569],[-8.96777,7.255227],[-8.9680322,7.2548501],[-8.9684142,7.2544609],[-8.968883,7.2542581],[-8.9694013,7.2539303],[-8.9696078,7.2536292],[-8.9696532,7.2533261],[-8.9698714,7.2531382],[-8.9702845,7.2530029],[-8.9707755,7.2529913],[-8.9713405,7.2531691],[-8.9719601,7.2535364],[-8.9725525,7.2536021],[-8.9733591,7.2534629],[-8.9738696,7.2532812],[-8.9742047,7.2530068],[-8.9743577,7.2528687],[-8.9746334,7.2527092],[-8.9747892,7.2524656],[-8.9749646,7.2524269],[-8.9751994,7.2524018],[-8.9753426,7.2525121],[-8.9753231,7.2527555],[-8.9753075,7.2530222],[-8.9753816,7.2534938],[-8.9756504,7.2538301],[-8.9762329,7.2540622],[-8.9770005,7.2542942],[-8.9780683,7.2543792],[-8.9793046,7.2543824],[-8.9819428,7.2540689],[-8.9828212,7.2540324],[-8.9830223,7.2540147],[-8.9833847,7.2537209],[-8.9836536,7.2530522],[-8.9838142,7.2516344],[-8.9838177,7.2510864],[-8.9839018,7.2503711],[-8.9844703,7.2495446],[-8.9854044,7.2483517],[-8.9860026,7.2481574],[-8.9865916,7.2492359],[-8.9867734,7.2496293],[-8.9868017,7.2501274],[-8.9868283,7.2508319],[-8.9868009,7.2511842],[-8.9869704,7.2515009],[-8.9873933,7.2519132],[-8.988578,7.2528774],[-8.9894676,7.2537172],[-8.9900291,7.2544716],[-8.9903778,7.2547435],[-8.9907906,7.2548605],[-8.9912623,7.2548633],[-8.991574,7.2548048],[-8.9924248,7.2543117],[-8.9936098,7.2531919],[-8.9940506,7.2526683],[-8.9948233,7.2521147],[-8.9953854,7.2520057],[-8.9961111,7.2520205],[-8.9965189,7.2522031],[-8.9967716,7.2523479],[-8.9972124,7.2526599],[-8.9975017,7.2526153],[-8.9977151,7.2524454],[-8.9980352,7.2520805],[-8.9984339,7.2515875],[-8.9987007,7.2509607],[-8.9989534,7.2504036],[-8.9993493,7.2498939],[-8.9996694,7.2494733],[-9.0012363,7.2481641],[-9.0020096,7.2476111],[-9.0032341,7.2470657],[-9.0039179,7.2468984],[-9.0058173,7.2463044],[-9.0070095,7.2459096],[-9.0083068,7.2458548],[-9.0085033,7.2456293],[-9.0093401,7.2452977],[-9.0101011,7.2449384],[-9.0106908,7.2445345],[-9.0111204,7.2439133],[-9.0113759,7.2435568],[-9.0116792,7.2435179],[-9.0125861,7.2438409],[-9.0133134,7.2439551],[-9.0140759,7.2440024],[-9.0145921,7.2440969],[-9.0149932,7.2444081],[-9.0150488,7.2448966],[-9.0152235,7.2454954],[-9.0151664,7.2462233],[-9.0153023,7.2468711],[-9.0158317,7.2474565],[-9.0162233,7.2481946],[-9.0164689,7.2485081],[-9.016866,7.2486893],[-9.0171281,7.2486736],[-9.0175721,7.2482255],[-9.017684,7.2480275],[-9.0179978,7.247669],[-9.0184068,7.2477557],[-9.0187404,7.2481142],[-9.0190382,7.2484057],[-9.0193718,7.2486381],[-9.0196577,7.2487208],[-9.0199595,7.2485713],[-9.0200548,7.2483387],[-9.0197967,7.2479133],[-9.019471,7.2472712],[-9.0194353,7.2468221],[-9.0193757,7.2459791],[-9.0196537,7.2454472],[-9.0202216,7.2446869],[-9.0207338,7.2441985],[-9.0214668,7.2438856],[-9.021949,7.24384],[-9.0223104,7.2438991],[-9.02262,7.2439287],[-9.0228306,7.2440685],[-9.0235414,7.2451124],[-9.023875,7.2459554],[-9.0243047,7.2467712],[-9.024588,7.2470126],[-9.024792,7.2471099],[-9.0252362,7.2470001],[-9.0257563,7.2467371],[-9.0265958,7.2460147],[-9.0271409,7.2454228],[-9.0274784,7.2447987],[-9.0276695,7.2444642],[-9.0278601,7.2439862],[-9.0276287,7.2430985],[-9.0274723,7.2427529],[-9.0274083,7.2425105],[-9.0275251,7.2422552],[-9.0277415,7.241876],[-9.0281894,7.241505],[-9.0286568,7.2413753],[-9.0294392,7.2413421],[-9.0299245,7.2414864],[-9.0303472,7.2417692],[-9.030641,7.2421776],[-9.0308414,7.2424518],[-9.031037,7.2424286],[-9.0318678,7.2419285],[-9.0336234,7.2404637],[-9.0340121,7.2400129],[-9.0342204,7.2395073],[-9.0343931,7.239068],[-9.0342336,7.2381618],[-9.0341144,7.2372834],[-9.0339509,7.2363907],[-9.0337917,7.2360542],[-9.0335974,7.2358958],[-9.0331189,7.23543],[-9.0329061,7.2352774],[-9.0328564,7.2351104],[-9.0328773,7.2349622],[-9.0332263,7.2344275],[-9.0339906,7.2338709],[-9.034519,7.2336369],[-9.03578,7.2334719],[-9.0369596,7.2334896],[-9.038183,7.2337789],[-9.0388461,7.2337832],[-9.0394631,7.2335243],[-9.0406354,7.2330162],[-9.040927,7.233174],[-9.0414905,7.2336048],[-9.042117,7.2339049],[-9.0425771,7.233882],[-9.043277,7.2337229],[-9.0440019,7.2334362],[-9.0444513,7.2330866],[-9.0448282,7.23263],[-9.0448378,7.2320235],[-9.0445443,7.2315493],[-9.04419,7.2313549],[-9.043753,7.2313209],[-9.042626,7.2315699],[-9.042155,7.2316029],[-9.0412611,7.2312436],[-9.041047,7.23098],[-9.0411017,7.2307316],[-9.0415154,7.2305157],[-9.0422407,7.2303553],[-9.0427907,7.230063],[-9.0430529,7.2297466],[-9.0433591,7.2295223],[-9.043807,7.2292369],[-9.0440928,7.2291145],[-9.0442108,7.2286524],[-9.0441533,7.2282194],[-9.0439485,7.2276275],[-9.0436028,7.2272188],[-9.0431684,7.2271259],[-9.0426971,7.2269691],[-9.0416804,7.226368],[-9.0409286,7.2256332],[-9.0405417,7.2249204],[-9.0403955,7.2245576],[-9.0403247,7.2242357],[-9.0404878,7.223858],[-9.040691,7.2236509],[-9.042054,7.2229819],[-9.0424542,7.2227005],[-9.0428349,7.2222085],[-9.0430647,7.22146],[-9.0432155,7.220935],[-9.0434892,7.2205298],[-9.044144,7.2202139],[-9.0451187,7.2201221],[-9.045808,7.2202339],[-9.046229,7.2200839],[-9.0466644,7.2196045],[-9.0472009,7.2186711],[-9.0477045,7.2177234],[-9.048185,7.2169119],[-9.0488311,7.2163463],[-9.050239,7.2154199],[-9.0507333,7.2151761],[-9.0512688,7.2153031],[-9.0516218,7.2156662],[-9.0518203,7.2160673],[-9.0516083,7.2165373],[-9.0516006,7.2170431],[-9.0517747,7.2173288],[-9.052039,7.2175322],[-9.052716,7.218107],[-9.05329,7.2184349],[-9.0537278,7.2186481],[-9.053931,7.2187559],[-9.0542473,7.218638],[-9.0542678,7.2182443],[-9.053564,7.2170751],[-9.0534985,7.2168153],[-9.0534781,7.2165028],[-9.0536336,7.2160441],[-9.05421,7.2151584],[-9.0545297,7.2148506],[-9.0547506,7.2146273],[-9.0551121,7.2142616],[-9.0557791,7.2141573],[-9.0566615,7.213925],[-9.0572252,7.2135441],[-9.0577459,7.2130523],[-9.05802,7.2128168],[-9.0582451,7.212622],[-9.0583474,7.2123134],[-9.058466,7.2117411],[-9.058376,7.2113595],[-9.0586829,7.2107303],[-9.0586952,7.2104584],[-9.0596608,7.2088791],[-9.0602623,7.2082053],[-9.0606388,7.2077953],[-9.0610193,7.2074624],[-9.0611864,7.2072763],[-9.0614623,7.2071435],[-9.0620578,7.2075854],[-9.0630368,7.2082161],[-9.0634084,7.2084666],[-9.0639468,7.2085518],[-9.0646687,7.2085893],[-9.0653294,7.2084689],[-9.0669361,7.2077912],[-9.067378,7.2075436],[-9.0678895,7.2071778],[-9.0685605,7.2063907],[-9.0693953,7.2055382],[-9.0699406,7.2044092],[-9.0703282,7.2035287],[-9.0708029,7.2031228],[-9.0712243,7.2029401],[-9.0716008,7.2028548],[-9.0719527,7.2027249],[-9.0719936,7.2024367],[-9.0718626,7.2020988],[-9.0715148,7.2017588],[-9.0705962,7.2009218],[-9.0697355,7.2000088],[-9.0695426,7.1996884],[-9.0696146,7.1993683],[-9.0696858,7.1989252],[-9.0698822,7.1985111],[-9.0702177,7.1983528],[-9.0707088,7.1985599],[-9.0711875,7.1986208],[-9.0714821,7.198905],[-9.0719404,7.1990957],[-9.0727301,7.199388],[-9.0734544,7.1994854],[-9.0738922,7.1995422],[-9.0741336,7.1996275],[-9.0742482,7.1997939],[-9.0743218,7.2002324],[-9.0744855,7.2008454],[-9.074821,7.2013975],[-9.0759913,7.2024935],[-9.0765273,7.2031512],[-9.0769856,7.2037763],[-9.0783932,7.2047587],[-9.0789783,7.2050795],[-9.0790852,7.2050772],[-9.0793384,7.2050713],[-9.0795594,7.2049414],[-9.0796412,7.2045761],[-9.0795174,7.2037769],[-9.0793793,7.203139],[-9.0792758,7.2026704],[-9.0795307,7.2018927],[-9.0799849,7.201162],[-9.0804983,7.2007471],[-9.0807583,7.2005368],[-9.0811265,7.200411],[-9.0815398,7.2005247],[-9.0816912,7.2008941],[-9.0814416,7.2015192],[-9.0813598,7.2020592],[-9.0816585,7.2023027],[-9.0827878,7.2026072],[-9.0833566,7.2029847],[-9.0838517,7.203208],[-9.0841422,7.2031228],[-9.084445,7.2026437],[-9.0847314,7.2022256],[-9.0854189,7.2021485],[-9.0867261,7.20253],[-9.0870188,7.2026153],[-9.0882299,7.2025991],[-9.089748,7.2024448],[-9.0905909,7.2024773],[-9.0910246,7.2027006],[-9.0915055,7.2028694],[-9.0915811,7.2034435],[-9.0913561,7.2047304],[-9.0914666,7.2055138],[-9.0915677,7.2058414],[-9.0916671,7.2061633],[-9.0918962,7.2070848],[-9.0921049,7.2075639],[-9.0923299,7.2077465],[-9.0926818,7.2077993],[-9.0932179,7.2077262],[-9.0941467,7.2078886],[-9.0947277,7.2081119],[-9.0950387,7.2084042],[-9.0949446,7.208867],[-9.0949528,7.2093988],[-9.0951942,7.2099752],[-9.0953988,7.2101822],[-9.0956934,7.2104217],[-9.095943,7.2104989],[-9.0962417,7.2104096],[-9.0966468,7.2102067],[-9.0968105,7.2097886],[-9.0978334,7.209009],[-9.0987377,7.2078399],[-9.0990896,7.2073081],[-9.1000009,7.2070925],[-9.1002952,7.2068087],[-9.1008591,7.2064796],[-9.1014138,7.2067276],[-9.1021316,7.2068136],[-9.1024835,7.2067973],[-9.1027208,7.2066918],[-9.1029745,7.2064685],[-9.1028436,7.2061925],[-9.1024328,7.2059642],[-9.1022462,7.205612],[-9.102463,7.2048812],[-9.1027617,7.2042114],[-9.1033018,7.2035132],[-9.103977,7.2025673],[-9.1045703,7.2021127],[-9.1053928,7.2018488],[-9.1058674,7.201593],[-9.10616,7.2012448],[-9.1061702,7.2006593],[-9.1059249,7.1993909],[-9.1058183,7.198459],[-9.1060266,7.1971845],[-9.106251,7.1953437],[-9.1064375,7.1929533],[-9.1065937,7.1918797],[-9.1068587,7.191433],[-9.1072592,7.1908807],[-9.1077684,7.1906567],[-9.1081888,7.1906045],[-9.108399,7.1915599],[-9.108725,7.1921859],[-9.108849,7.1931189],[-9.1089636,7.1935702],[-9.1089521,7.1938074],[-9.10876,7.1945719],[-9.108489,7.1952349],[-9.1077498,7.1960711],[-9.107676,7.1965003],[-9.1078671,7.1970094],[-9.1082429,7.1975502],[-9.1087605,7.1980041],[-9.1093372,7.1987826],[-9.109752,7.1997409],[-9.1104869,7.201484],[-9.1111065,7.2022586],[-9.1114245,7.2029398],[-9.1113686,7.2034735],[-9.1111734,7.2040966],[-9.1108342,7.2048974],[-9.1103956,7.2061299],[-9.1102874,7.2068919],[-9.1100745,7.2083206],[-9.1091182,7.2101058],[-9.1082501,7.2113321],[-9.1081586,7.212293],[-9.1077534,7.2127359],[-9.107124,7.2129568],[-9.1062092,7.2132996],[-9.104865,7.2137229],[-9.1045169,7.2139366],[-9.1041133,7.2143651],[-9.1040846,7.2149711],[-9.10413,7.2157319],[-9.1042054,7.2162447],[-9.1043958,7.2166688],[-9.1046232,7.2173988],[-9.1044892,7.217848],[-9.104068,7.2181279],[-9.103403,7.2184919],[-9.1024189,7.2189385],[-9.1017475,7.2194194],[-9.1014967,7.2196865],[-9.1014449,7.2200642],[-9.1014608,7.2203957],[-9.1014671,7.2206421],[-9.101632,7.2211159],[-9.102183,7.2224739],[-9.1022454,7.2229061],[-9.1028331,7.2237353],[-9.1037128,7.2245903],[-9.10396,7.2248829],[-9.1040932,7.2254735],[-9.1042014,7.2257589],[-9.10513,7.2273389],[-9.10511,7.2278009],[-9.1048793,7.2288664],[-9.104705,7.2296341],[-9.1047586,7.2300929],[-9.104643,7.2306289],[-9.1047,7.2310229],[-9.104728,7.2317562],[-9.1054179,7.2322921],[-9.1056996,7.2324616],[-9.1057919,7.2326447],[-9.1058486,7.2329363],[-9.1055907,7.233457],[-9.1056428,7.2343358],[-9.1055512,7.2346942],[-9.1048316,7.2348067],[-9.1045475,7.2350327],[-9.1044005,7.2352519],[-9.1042132,7.2358839],[-9.1041806,7.236354],[-9.1042421,7.2374193],[-9.1043525,7.2380773],[-9.1046595,7.2383547],[-9.1049463,7.2386967],[-9.1053805,7.2387257],[-9.1056641,7.2387437],[-9.1060259,7.2387158],[-9.1062679,7.2386305],[-9.1065116,7.2383355],[-9.1065115,7.2374683],[-9.1066955,7.2374776],[-9.1069031,7.2376185],[-9.1069595,7.23824],[-9.107067,7.238369],[-9.1073458,7.2384674],[-9.1076453,7.2383709],[-9.1077881,7.2380124],[-9.1082048,7.237822],[-9.1088639,7.238052],[-9.1092664,7.2381165],[-9.1097813,7.2376919],[-9.1099657,7.2373828],[-9.1104801,7.2372496],[-9.1112144,7.2369661],[-9.1115442,7.23658],[-9.1115614,7.2361931],[-9.1114583,7.2357447],[-9.1113512,7.235466],[-9.1111332,7.2351344],[-9.1107203,7.2349372],[-9.1099716,7.234883],[-9.1098618,7.234652],[-9.1099365,7.2344213],[-9.1102534,7.2343058],[-9.110579,7.2344311],[-9.1110481,7.234425],[-9.1118529,7.2346651],[-9.1119789,7.2350658],[-9.1120633,7.2353651],[-9.1124653,7.2355314],[-9.1127709,7.236483],[-9.1127686,7.2368826],[-9.112493,7.2373472],[-9.1123477,7.2375457],[-9.112325,7.2376034],[-9.1122096,7.2378733],[-9.1119166,7.2382805],[-9.1110452,7.2390049],[-9.1108409,7.239246],[-9.1108254,7.2395283],[-9.1109199,7.2397595],[-9.1110776,7.2399308],[-9.112041,7.2404681],[-9.1131832,7.2411627],[-9.113628,7.2415784],[-9.1137297,7.2418263],[-9.1137902,7.2425119],[-9.1136052,7.2428362],[-9.112996,7.2437753],[-9.1128058,7.2448372],[-9.1122469,7.2470667],[-9.1120737,7.2475201],[-9.1113433,7.2480335],[-9.1110065,7.2485047],[-9.1113286,7.2491858],[-9.1117782,7.2493696],[-9.1118495,7.2500296],[-9.1125849,7.2501996],[-9.1130147,7.2498445],[-9.1137064,7.2498761],[-9.1141375,7.2496409],[-9.1152066,7.2488694],[-9.1153929,7.249008],[-9.1151142,7.2493073],[-9.1151823,7.2496531],[-9.1157138,7.2498307],[-9.1160237,7.2495588],[-9.1169828,7.2496859],[-9.1173288,7.249898],[-9.1175007,7.2506189],[-9.1178299,7.2508802],[-9.1182797,7.2508257],[-9.1184971,7.2502672],[-9.1190351,7.2500227],[-9.1196028,7.2498622],[-9.1198544,7.2498974],[-9.1201146,7.2500437],[-9.120152,7.2503857],[-9.120405,7.2510744],[-9.1205406,7.2512076],[-9.1212328,7.2509237],[-9.1215323,7.2510804],[-9.1216577,7.251407],[-9.1218086,7.2518592],[-9.1220164,7.2520901],[-9.122387,7.2524039],[-9.1224795,7.2531958],[-9.1222883,7.2533648],[-9.1218221,7.2534348],[-9.1218139,7.2538947],[-9.1226337,7.2545191],[-9.1227768,7.2548356],[-9.1228918,7.2549476],[-9.1235217,7.2548833],[-9.123947,7.2547707],[-9.1252846,7.2546244],[-9.1257941,7.2549252],[-9.1261041,7.2554499],[-9.1265241,7.2559438],[-9.1264258,7.2565324],[-9.126259,7.2569366],[-9.126115,7.2572049],[-9.1266161,7.257693],[-9.1265304,7.2582018],[-9.1262585,7.2583102],[-9.1259732,7.2585639],[-9.1256755,7.2590024],[-9.1257751,7.2597531],[-9.1252467,7.2609216],[-9.1246427,7.2624881],[-9.1244512,7.2629564],[-9.1240864,7.2635985],[-9.1235026,7.2641169],[-9.1229958,7.2644064],[-9.1227864,7.2647725],[-9.122773,7.2653716],[-9.1230737,7.2668444],[-9.1232192,7.2672438],[-9.1232371,7.2677881],[-9.1232132,7.2685349],[-9.1231679,7.2690119],[-9.1227675,7.2703737],[-9.1229942,7.2707541],[-9.1228572,7.2715781],[-9.1233112,7.2730492],[-9.1236199,7.2735768],[-9.1241096,7.2739401],[-9.124559,7.2746089],[-9.124832,7.2748279],[-9.125182,7.2749489],[-9.125729,7.2750259],[-9.126189,7.2750269],[-9.126868,7.2747429],[-9.127876,7.2741749],[-9.128204,7.2741649],[-9.129123,7.2744839],[-9.129802,7.2745279],[-9.131235,7.2744539],[-9.132539,7.2737109],[-9.133098,7.2734269],[-9.133459,7.2733079],[-9.134313,7.2733419],[-9.135111,7.2734739],[-9.135604,7.2734859],[-9.135921,7.2734199],[-9.136513,7.2731589],[-9.137816,7.2723179],[-9.138419,7.2720119],[-9.138835,7.2718919],[-9.139284,7.2718379],[-9.141812,7.2719399],[-9.142239,7.2718969],[-9.143114,7.2716789],[-9.144319,7.2715059],[-9.144734,7.2716479],[-9.145215,7.2721089],[-9.145434,7.2722399],[-9.145762,7.2722299],[-9.148303,7.2712919],[-9.148587,7.2711499],[-9.149003,7.2711729],[-9.150097,7.2718959],[-9.150337,7.2719079],[-9.150589,7.2718419],[-9.151115,7.2715149],[-9.151476,7.2713509],[-9.151816,7.2713519],[-9.152122,7.2714609],[-9.15257,7.2718779],[-9.152811,7.2720089],[-9.153095,7.2720429],[-9.153489,7.2719559],[-9.154015,7.2716499],[-9.154902,7.2710159],[-9.155132,7.2709289],[-9.155351,7.2710389],[-9.155504,7.2712689],[-9.155492,7.2720459],[-9.155721,7.2723739],[-9.156126,7.2726699],[-9.156683,7.2732399],[-9.156846,7.2735799],[-9.156999,7.2737769],[-9.15713,7.2738869],[-9.157721,7.2740409],[-9.157885,7.2742159],[-9.15794,7.2744349],[-9.15795,7.2747629],[-9.158037,7.2749929],[-9.158168,7.2751249],[-9.158551,7.2751359],[-9.15888,7.2749179],[-9.159275,7.2745459],[-9.159647,7.2742949],[-9.160227,7.2741309],[-9.160566,7.2742849],[-9.160818,7.2745589],[-9.16085,7.2747999],[-9.160751,7.2752259],[-9.160849,7.2753909],[-9.161046,7.2755659],[-9.161757,7.2757529],[-9.163059,7.2758199],[-9.163322,7.2759409],[-9.163442,7.2761599],[-9.163507,7.2764119],[-9.163419,7.2766639],[-9.163572,7.2771559],[-9.163823,7.2773209],[-9.164731,7.2773439],[-9.165092,7.2774539],[-9.165431,7.2776619],[-9.165573,7.2778369],[-9.165573,7.2782529],[-9.165627,7.2784939],[-9.165791,7.2786909],[-9.166075,7.2787349],[-9.166568,7.2786809],[-9.167039,7.2785619],[-9.167706,7.2784639],[-9.167925,7.2785079],[-9.1681,7.2786509],[-9.168274,7.2792089],[-9.168624,7.2794279],[-9.168788,7.2797569],[-9.168809,7.2800409],[-9.168776,7.2804569],[-9.168523,7.2808839],[-9.16837,7.2812449],[-9.168282,7.2816379],[-9.16862,7.2824049],[-9.16828,7.2827879],[-9.168159,7.2829949],[-9.168202,7.2837829],[-9.168594,7.2848449],[-9.1688181,7.2851913],[-9.16914,7.2856889],[-9.169543,7.2866629],[-9.169707,7.2869589],[-9.169849,7.2871559],[-9.170745,7.2877809],[-9.170844,7.2880109],[-9.170886,7.2888319],[-9.171071,7.2892369],[-9.171377,7.2895769],[-9.171618,7.2897629],[-9.172461,7.2896979],[-9.172658,7.2897209],[-9.172833,7.2898519],[-9.173049,7.2914499],[-9.173497,7.2920309],[-9.173781,7.2921079],[-9.174307,7.2921189],[-9.174854,7.2922729],[-9.175116,7.2922849],[-9.175828,7.2920989],[-9.176069,7.2920779],[-9.176276,7.2922419],[-9.176297,7.2931939],[-9.176351,7.2935009],[-9.17646,7.2937199],[-9.176624,7.2937969],[-9.176832,7.2937859],[-9.17737,7.2931629],[-9.177578,7.2930539],[-9.177753,7.2930209],[-9.177884,7.2930979],[-9.177927,7.2932949],[-9.177729,7.2940059],[-9.177762,7.2942029],[-9.177915,7.2943569],[-9.178199,7.2944989],[-9.178385,7.2947399],[-9.178406,7.2949919],[-9.17834,7.2951669],[-9.178165,7.2953749],[-9.177694,7.2956589],[-9.177628,7.2958449],[-9.177627,7.2965999],[-9.177703,7.2968399],[-9.177878,7.2970599],[-9.178184,7.2971479],[-9.178381,7.2972789],[-9.178523,7.2974429],[-9.178599,7.2978049],[-9.178608,7.2990089],[-9.178542,7.2992709],[-9.178618,7.2999059],[-9.178782,7.3001139],[-9.178967,7.3002349],[-9.179449,7.3003879],[-9.179667,7.3005309],[-9.179733,7.3006839],[-9.179733,7.3009029],[-9.179568,7.3013629],[-9.179523,7.3019859],[-9.179752,7.3022269],[-9.180037,7.3023149],[-9.18054,7.3022829],[-9.180891,7.3021409],[-9.181756,7.3019889],[-9.181854,7.3020329],[-9.181909,7.3021429],[-9.181821,7.3022739],[-9.181482,7.3023719],[-9.181416,7.3024589],[-9.181405,7.3026019],[-9.181514,7.3027219],[-9.181754,7.3028539],[-9.182083,7.3028649],[-9.182685,7.3026689],[-9.183058,7.3023409],[-9.183343,7.3020019],[-9.183584,7.3018379],[-9.183847,7.3017729],[-9.184131,7.3018279],[-9.18435,7.3019269],[-9.184787,7.3024419],[-9.184984,7.3026059],[-9.185717,7.3025849],[-9.186034,7.3026399],[-9.186275,7.3027609],[-9.186395,7.3029469],[-9.186438,7.3036149],[-9.187551,7.3055309],[-9.188054,7.3062209],[-9.188392,7.3064739],[-9.188677,7.3065719],[-9.189235,7.3065729],[-9.189695,7.3066279],[-9.190023,7.3067379],[-9.190384,7.3070119],[-9.191106,7.3070129],[-9.191325,7.3070899],[-9.191718,7.3075609],[-9.191904,7.3077039],[-9.192265,7.3077259],[-9.192659,7.3081639],[-9.193095,7.3092919],[-9.193072,7.3100359],[-9.193137,7.3102659],[-9.193279,7.3103969],[-9.193531,7.3104419],[-9.194056,7.3102999],[-9.194209,7.3103329],[-9.19445,7.3104759],[-9.196417,7.3124259],[-9.197358,7.3129299],[-9.197511,7.3131169],[-9.19799,7.3145509],[-9.198044,7.3151089],[-9.19801,7.3160609],[-9.198217,7.3164229],[-9.198436,7.3166089],[-9.198523,7.3167839],[-9.198424,7.3171229],[-9.197919,7.3180419],[-9.197886,7.3184029],[-9.198104,7.3186439],[-9.198257,7.3187759],[-9.19852,7.3187869],[-9.198783,7.3187109],[-9.199101,7.3185799],[-9.199846,7.3180879],[-9.200108,7.3180339],[-9.200316,7.3181539],[-9.200644,7.3184389],[-9.200917,7.3185709],[-9.20129,7.3186149],[-9.201673,7.3185279],[-9.202198,7.3183319],[-9.202472,7.3183869],[-9.202713,7.3183759],[-9.20303,7.3186059],[-9.203205,7.3189459],[-9.203466,7.3197669],[-9.203848,7.3207519],[-9.203902,7.3211789],[-9.203759,7.3214629],[-9.203178,7.3219659],[-9.203079,7.3221849],[-9.203035,7.3226549],[-9.202914,7.3229619],[-9.202508,7.3235519],[-9.202507,7.3240229],[-9.202594,7.3244169],[-9.202812,7.3250519],[-9.202834,7.3253259],[-9.202779,7.3256979],[-9.202647,7.3260369],[-9.202602,7.3263759],[-9.202689,7.3268029],[-9.202711,7.3271749],[-9.202666,7.3276129],[-9.202084,7.329133],[-9.202007,7.32956],[-9.202082,7.33014],[-9.202638,7.331541],[-9.202999,7.3322529],[-9.203053,7.3328],[-9.202832,7.3336539],[-9.202393,7.334945],[-9.201679,7.3366839],[-9.201569,7.337045],[-9.201491,7.337789],[-9.201523,7.338446],[-9.201566,7.338675],[-9.201839,7.339332],[-9.201871,7.339989],[-9.201969,7.340197],[-9.202395,7.3406459],[-9.202778,7.3408769],[-9.203193,7.3413589],[-9.203706,7.3425409],[-9.204198,7.3429689],[-9.2047,7.3438009],[-9.20471,7.3440959],[-9.204655,7.3442929],[-9.204524,7.3445229],[-9.203976,7.3451019],[-9.203614,7.3456709],[-9.203591,7.3461849],[-9.203842,7.3469409],[-9.204082,7.3474659],[-9.204464,7.3481339],[-9.205108,7.3490649],[-9.205906,7.3499089],[-9.206617,7.3503689],[-9.206737,7.3505339],[-9.20701,7.3511359],[-9.207194,7.3521869],[-9.207259,7.3528539],[-9.207225,7.3532699],[-9.207116,7.3534229],[-9.206897,7.3535219],[-9.206207,7.3534989],[-9.205977,7.3535749],[-9.205769,7.3537059],[-9.205648,7.3539359],[-9.205516,7.3544609],[-9.205197,7.3553909],[-9.205053,7.3564299],[-9.204933,7.3567039],[-9.204505,7.3569549],[-9.203662,7.3570199],[-9.203191,7.3572049],[-9.202939,7.3574349],[-9.202687,7.3578059],[-9.202522,7.3584409],[-9.201985,7.3590199],[-9.201984,7.3593489],[-9.202071,7.3595789],[-9.202246,7.3597979],[-9.202531,7.3599179],[-9.203844,7.3600509],[-9.204205,7.3603579],[-9.204215,7.3605769],[-9.20416,7.3609159],[-9.203711,7.3613749],[-9.203524,7.3617689],[-9.203392,7.3624579],[-9.203171,7.3632349],[-9.203193,7.3635419],[-9.20328,7.3638919],[-9.203301,7.3642089],[-9.203268,7.3644169],[-9.203169,7.3645919],[-9.202665,7.3651389],[-9.202643,7.3654889],[-9.202828,7.3660359],[-9.202839,7.3663209],[-9.202991,7.3666169],[-9.203199,7.3668029],[-9.203451,7.3669449],[-9.203932,7.3669459],[-9.204929,7.3667609],[-9.205356,7.3667729],[-9.205563,7.3668169],[-9.205717,7.3669369],[-9.20588,7.3672109],[-9.205792,7.3674519],[-9.205562,7.3677579],[-9.20543,7.3680419],[-9.205408,7.3683919],[-9.205342,7.3685349],[-9.205133,7.3689059],[-9.204793,7.3693769],[-9.204255,7.3710719],[-9.204243,7.3716849],[-9.204395,7.3726149],[-9.204547,7.3731739],[-9.204864,7.3737319],[-9.204896,7.3740169],[-9.204786,7.3742139],[-9.204468,7.3744209],[-9.204403,7.3745739],[-9.204554,7.3758989],[-9.204488,7.3762599],[-9.204312,7.3765219],[-9.204092,7.3770139],[-9.204003,7.3783279],[-9.203904,7.3785349],[-9.203696,7.3787539],[-9.202995,7.3790599],[-9.202545,7.3794529],[-9.202205,7.3801199],[-9.2016,7.3818379],[-9.201589,7.3822859],[-9.20173,7.3827019],[-9.201894,7.3830199],[-9.202113,7.3832829],[-9.202167,7.3835669],[-9.202165,7.3849459],[-9.202241,7.3853189],[-9.202361,7.3856029],[-9.202525,7.3857679],[-9.203608,7.3862179],[-9.204144,7.3865569],[-9.205391,7.3869639],[-9.205665,7.3871719],[-9.205894,7.3876099],[-9.206046,7.3881029],[-9.20621,7.3883879],[-9.206812,7.3889569],[-9.206986,7.3892969],[-9.207435,7.3892649],[-9.208049,7.3887289],[-9.208356,7.3885539],[-9.20864,7.3884669],[-9.211619,7.3878909],[-9.211849,7.3877599],[-9.212046,7.3875189],[-9.212595,7.3865129],[-9.213022,7.3863159],[-9.213471,7.3861749],[-9.215125,7.3859249],[-9.215683,7.3859039],[-9.216176,7.3859809],[-9.216362,7.3859589],[-9.217085,7.3855549],[-9.217391,7.3855009],[-9.218442,7.3856549],[-9.219033,7.3856889],[-9.221342,7.3861949],[-9.222349,7.3862619],[-9.224517,7.3862309],[-9.22537,7.3864179],[-9.225742,7.3865499],[-9.226038,7.3867689],[-9.226202,7.3870319],[-9.226322,7.3873279],[-9.226626,7.3887949],[-9.226822,7.3891449],[-9.227501,7.3893209],[-9.228541,7.3893769],[-9.231311,7.3893469],[-9.231628,7.3894459],[-9.231934,7.3895999],[-9.232973,7.3903339],[-9.233564,7.3906409],[-9.235107,7.3906429],[-9.235425,7.3905009],[-9.236443,7.3901849],[-9.237067,7.3901749],[-9.237834,7.3902299],[-9.238863,7.3901109],[-9.239334,7.3900239],[-9.240769,7.3893359],[-9.24125,7.3893909],[-9.241786,7.3895999],[-9.241984,7.3895449],[-9.242181,7.3894029],[-9.242477,7.3890859],[-9.243091,7.3882879],[-9.243343,7.3881349],[-9.244986,7.3875569],[-9.246005,7.3870219],[-9.246322,7.3867809],[-9.246608,7.3864319],[-9.246882,7.3859609],[-9.24753,7.3845939],[-9.247661,7.3843969],[-9.247848,7.3842329],[-9.248428,7.3842779],[-9.24869,7.3843439],[-9.249632,7.3843769],[-9.250115,7.3844499],[-9.251172,7.3848449],[-9.251524,7.3848849],[-9.252007,7.3851609],[-9.252268,7.3852009],[-9.25253,7.3851229],[-9.252778,7.3849539],[-9.253133,7.3844329],[-9.253656,7.3842899],[-9.253774,7.3841209],[-9.254009,7.3840039],[-9.254245,7.3839789],[-9.254987,7.3845939],[-9.255431,7.3848309],[-9.255744,7.3848969],[-9.256542,7.3846249],[-9.257732,7.3841449],[-9.258714,7.3835079],[-9.259054,7.3834689],[-9.259446,7.3835229],[-9.25972,7.3836539],[-9.260059,7.3836809],[-9.260282,7.3834989],[-9.260609,7.3834079],[-9.260792,7.3832779],[-9.260936,7.3830959],[-9.261043,7.3823259],[-9.261435,7.3823269],[-9.261697,7.3821709],[-9.261854,7.3819229],[-9.261895,7.3812959],[-9.262485,7.3806449],[-9.262942,7.3806459],[-9.263571,7.3803079],[-9.265048,7.3799199],[-9.265795,7.3792689],[-9.265914,7.3787469],[-9.266228,7.3785129],[-9.266542,7.3784489],[-9.267273,7.3784509],[-9.267574,7.3783209],[-9.268661,7.3773699],[-9.269119,7.3771099],[-9.269472,7.3770069],[-9.269851,7.3769689],[-9.271105,7.3769719],[-9.27185,7.3771309],[-9.272907,7.3775519],[-9.273363,7.3776839],[-9.273873,7.3776589],[-9.274317,7.3775689],[-9.274671,7.3774389],[-9.275037,7.3772049],[-9.275365,7.3768789],[-9.275548,7.3767619],[-9.276671,7.3768169],[-9.277142,7.3767139],[-9.277809,7.3764029],[-9.279013,7.3757009],[-9.279615,7.3754279],[-9.280582,7.3751819],[-9.281562,7.3751589],[-9.28198,7.3752649],[-9.282345,7.3754479],[-9.282814,7.3758019],[-9.283283,7.3762349],[-9.283622,7.3764439],[-9.283988,7.3765499],[-9.284354,7.3764719],[-9.284955,7.3764479],[-9.285373,7.3765669],[-9.285829,7.3767639],[-9.28622,7.3770519],[-9.286741,7.3777459],[-9.287338,7.3791839],[-9.287749,7.3812879],[-9.287944,7.3819019],[-9.288021,7.3823599],[-9.288267,7.3828699],[-9.288379,7.3848419],[-9.288443,7.3852859],[-9.288559,7.3856909],[-9.288571,7.3861619],[-9.288437,7.3871929],[-9.288541,7.3875719],[-9.288801,7.3878989],[-9.289179,7.3880569],[-9.289532,7.3880579],[-9.289899,7.3878109],[-9.290632,7.3871339],[-9.290921,7.3865989],[-9.291053,7.3861809],[-9.291263,7.3859209],[-9.291433,7.3858039],[-9.291904,7.3857919],[-9.292243,7.3858709],[-9.292713,7.3860159],[-9.293026,7.3861869],[-9.293247,7.3864879],[-9.293702,7.3874159],[-9.293727,7.3876249],[-9.29357,7.3878069],[-9.29268,7.3883139],[-9.292561,7.3886409],[-9.292572,7.3895679],[-9.292466,7.3898289],[-9.292218,7.3900759],[-9.292204,7.3902979],[-9.292268,7.3906119],[-9.292411,7.3908999],[-9.292423,7.3912129],[-9.291558,7.3920599],[-9.291349,7.3923599],[-9.291204,7.3927639],[-9.290953,7.3935209],[-9.290725,7.395545],[-9.290318,7.396393],[-9.290264,7.39668],[-9.290195,7.398142],[-9.290154,7.398534],[-9.290062,7.39886],[-9.289392,7.400125],[-9.289036,7.401208],[-9.288564,7.401939],[-9.288498,7.402173],[-9.288482,7.402931],[-9.288139,7.404079],[-9.288006,7.40481],[-9.2878301,7.4070299],[-9.2879331,7.4073699],[-9.2881291,7.4076709],[-9.2880891,7.4079059],[-9.2878521,7.4083879],[-9.2878121,7.4087539],[-9.2880981,7.4092146],[-9.2901871,7.4095726],[-9.2906831,7.4098226],[-9.2910741,7.4100716],[-9.2915431,7.4104646],[-9.2917391,7.4107257],[-9.2920111,7.4114057],[-9.2923201,7.4127916],[-9.2924231,7.4136276],[-9.2925911,7.4142546],[-9.2926411,7.4149866],[-9.2926141,7.4152737],[-9.2922321,7.4160697],[-9.2921661,7.4163827],[-9.2921641,7.4171397],[-9.2923961,7.4181467],[-9.2924731,7.4187867],[-9.2921841,7.4192557],[-9.2918431,7.4196727],[-9.2917771,7.4198427],[-9.2917901,7.4200127],[-9.2918671,7.4202867],[-9.2923221,7.4212017],[-9.2925171,7.4214767],[-9.2930891,7.4225497],[-9.2932051,7.4230327],[-9.2934757,7.4240659],[-9.2940952,7.4241174],[-9.2942948,7.4245255],[-9.2939432,7.425349],[-9.294049,7.4261361],[-9.2945057,7.4265988],[-9.2955253,7.4272577],[-9.2972939,7.4275776],[-9.2997672,7.4273942],[-9.3004486,7.4269142],[-9.3014876,7.4258302],[-9.3022413,7.4247388],[-9.3034471,7.4241557],[-9.3037323,7.4240731],[-9.3046102,7.4234997],[-9.3059591,7.4233439],[-9.3065744,7.4236555],[-9.3072185,7.4242673],[-9.3077485,7.4248377],[-9.3082453,7.4260382],[-9.3081841,7.42645],[-9.3080748,7.4267929],[-9.3080346,7.4273499],[-9.3080518,7.4279749],[-9.3084161,7.4288257],[-9.3101523,7.4312254],[-9.3106462,7.4326494],[-9.3109159,7.4337031],[-9.3111891,7.4345326],[-9.3117117,7.4348826],[-9.3121717,7.4349458],[-9.313548,7.434858],[-9.316113,7.434865],[-9.3171921,7.4347958],[-9.3177918,7.4348826],[-9.32047,7.4358135],[-9.3212623,7.4360419],[-9.3220607,7.4360442],[-9.3227422,7.4355056],[-9.3232853,7.4349101],[-9.3246292,7.433213],[-9.3258749,7.4321527],[-9.3264378,7.4318811],[-9.3270685,7.4317251],[-9.3280577,7.4315482],[-9.3295121,7.4313864],[-9.330141,7.4311519],[-9.3305403,7.4308448],[-9.3305611,7.4304295],[-9.3300508,7.430079],[-9.329205,7.4295496],[-9.3287532,7.4290882],[-9.3286581,7.4286289],[-9.32866,7.4277155],[-9.3287354,7.427333],[-9.3290824,7.4270981],[-9.3296118,7.427099],[-9.3299887,7.4272416],[-9.3307386,7.4278559],[-9.3315583,7.4286797],[-9.3321698,7.4290289],[-9.3326459,7.4291287],[-9.3333972,7.4292236],[-9.3344268,7.4296174],[-9.3351559,7.4299996],[-9.3356482,7.4301051],[-9.3362251,7.4299619],[-9.3375975,7.4292472],[-9.3382036,7.4289357],[-9.3392752,7.4289424],[-9.3422874,7.4290228],[-9.343689,7.4291699],[-9.344667,7.4293861],[-9.3452432,7.4295967],[-9.3460604,7.4300258],[-9.346567,7.4303601],[-9.3471538,7.4308943],[-9.3476347,7.4311558],[-9.3487535,7.4313605],[-9.3491062,7.4315061],[-9.3494267,7.4317971],[-9.3495307,7.4321428],[-9.3495288,7.4325763],[-9.3494786,7.4329419],[-9.3492993,7.4333763],[-9.3493884,7.433714],[-9.3495258,7.4341108],[-9.3497544,7.4344161],[-9.3501179,7.4350377],[-9.3505236,7.4355436],[-9.3508787,7.4357816],[-9.3512382,7.4357268],[-9.3514783,7.4355145],[-9.3517663,7.4346609],[-9.3523177,7.433494],[-9.3525161,7.432762],[-9.3529194,7.4321599],[-9.353461,7.4317735],[-9.3542355,7.4314239],[-9.3551737,7.4311439],[-9.3558889,7.4310585],[-9.3562058,7.4310736],[-9.3564596,7.431315],[-9.3569941,7.4323899],[-9.3573477,7.432904],[-9.3580134,7.4333359],[-9.3587804,7.4336143],[-9.3595018,7.4335403],[-9.3600968,7.4335597],[-9.360501,7.4334598],[-9.3622737,7.4326718],[-9.3638291,7.431744],[-9.3649678,7.4307317],[-9.3657214,7.4297903],[-9.3657769,7.4291314],[-9.3656919,7.4287318],[-9.3653137,7.4283569],[-9.3645193,7.4281229],[-9.3641408,7.4276733],[-9.363417,7.4267942],[-9.3634016,7.4264126],[-9.3635316,7.4260071],[-9.3645956,7.4254903],[-9.3650027,7.4251112],[-9.3656233,7.4248291],[-9.3661047,7.4245681],[-9.3666659,7.4240591],[-9.3670429,7.423631],[-9.3674248,7.4230719],[-9.3676702,7.4225993],[-9.3677499,7.4220053],[-9.3676882,7.4213498],[-9.3671774,7.4206615],[-9.3670673,7.4198484],[-9.3668205,7.4193143],[-9.3657184,7.4180348],[-9.3637949,7.4160374],[-9.3635339,7.4159069],[-9.3631275,7.4158175],[-9.3630002,7.4157323],[-9.3629694,7.4155765],[-9.3630807,7.4152159],[-9.3633412,7.4141828],[-9.3639819,7.4135118],[-9.3645291,7.4130826],[-9.3650537,7.4130177],[-9.3654538,7.4132006],[-9.3657628,7.4132974],[-9.3659313,7.413585],[-9.3659952,7.4137555],[-9.3660466,7.4142308],[-9.3667394,7.4144239],[-9.3671501,7.4142948],[-9.3676077,7.4140487],[-9.3680565,7.4135678],[-9.3684193,7.413327],[-9.368873,7.4131742],[-9.3700348,7.4133431],[-9.3708282,7.4136237],[-9.3718623,7.4141894],[-9.3722125,7.4142661],[-9.372506,7.4141956],[-9.3729371,7.4138675],[-9.3734269,7.4133957],[-9.3748995,7.4123542],[-9.3755968,7.4118692],[-9.3758417,7.4114884],[-9.3760739,7.410867],[-9.3762178,7.4104392],[-9.3771412,7.4097648],[-9.3778641,7.4093668],[-9.3783019,7.4090817],[-9.3788538,7.4089023],[-9.3801314,7.4092039],[-9.38082,7.4092634],[-9.3811231,7.408907],[-9.3817164,7.4081946],[-9.3817958,7.407854],[-9.3816847,7.4072325],[-9.3815309,7.4064973],[-9.3817154,7.405928],[-9.3820443,7.4058689],[-9.3824664,7.4061415],[-9.3826765,7.4061254],[-9.3828353,7.405663],[-9.3829228,7.4048836],[-9.382973,7.4042697],[-9.3830907,7.4035662],[-9.3830441,7.4023393],[-9.3833742,7.4014367],[-9.3834216,7.4004474],[-9.3834074,7.3997876],[-9.3835533,7.3992266],[-9.3834359,7.3984293],[-9.3836244,7.3981788],[-9.3836694,7.3973986],[-9.3839262,7.3969736],[-9.383863,7.3964275],[-9.3838935,7.3956628],[-9.3839876,7.3951278],[-9.3842036,7.3948176],[-9.3845869,7.3942141],[-9.3850183,7.394064],[-9.3861844,7.3939865],[-9.3861881,7.3945657],[-9.3865794,7.3947692],[-9.3878758,7.3949452],[-9.388763,7.3951367],[-9.3894816,7.3957162],[-9.3905976,7.3960282],[-9.3912743,7.3956352],[-9.3918801,7.3950256],[-9.3926022,7.3944839],[-9.3932742,7.3944299],[-9.393637,7.3945262],[-9.3940917,7.394972],[-9.3943414,7.3955127],[-9.3949423,7.395579],[-9.3957847,7.3955491],[-9.3962711,7.3955984],[-9.39683,7.3954321],[-9.3971326,7.3950273],[-9.3974261,7.3945475],[-9.3984252,7.3943365],[-9.3992611,7.3940376],[-9.3992975,7.3937219],[-9.3991836,7.3933042],[-9.3990341,7.3925659],[-9.3989719,7.3920465],[-9.398798,7.3915711],[-9.3989032,7.3911533],[-9.3998372,7.3899618],[-9.4007076,7.3888538],[-9.4035429,7.3883492],[-9.4038004,7.3887031],[-9.4038566,7.3892345],[-9.4040415,7.3897433],[-9.4043319,7.3899414],[-9.4048158,7.3898639],[-9.4054988,7.3896185],[-9.4062836,7.3895336],[-9.4066729,7.3895815],[-9.4068974,7.3898554],[-9.4070274,7.3901496],[-9.4072326,7.3906171],[-9.4074908,7.3912665],[-9.4071228,7.3919109],[-9.4067682,7.3925379],[-9.4058015,7.393861],[-9.4057523,7.3943727],[-9.4054693,7.3950255],[-9.4051721,7.3956059],[-9.4049601,7.3959039],[-9.4046137,7.396417],[-9.4041996,7.3970364],[-9.4035756,7.3979186],[-9.4026369,7.3990941],[-9.4023995,7.3996924],[-9.4022609,7.4005046],[-9.4021209,7.402054],[-9.4022588,7.4025209],[-9.4028721,7.4031021],[-9.4045299,7.4043745],[-9.4054751,7.4050995],[-9.4057105,7.4055203],[-9.405754,7.4058784],[-9.4056501,7.4061543],[-9.4049182,7.4068828],[-9.4044266,7.4076337],[-9.4041163,7.4080232],[-9.4040862,7.4084459],[-9.4039342,7.40888],[-9.4038624,7.4091279],[-9.403361,7.4099147],[-9.4029386,7.4104889],[-9.4028859,7.4108435],[-9.4029122,7.4114172],[-9.4031723,7.4120641],[-9.4035015,7.4124771],[-9.4039187,7.4128713],[-9.404146,7.4130857],[-9.4047448,7.4135712],[-9.4051305,7.4135554],[-9.4054489,7.4129262],[-9.405758,7.4124529],[-9.4063772,7.4121657],[-9.4069735,7.4119713],[-9.4074382,7.4121018],[-9.4077336,7.4122962],[-9.408244,7.4129248],[-9.4088215,7.4137612],[-9.4095251,7.4147495],[-9.4099066,7.4153968],[-9.4101081,7.415799],[-9.4100329,7.4161665],[-9.409681,7.4170828],[-9.4096703,7.4174531],[-9.4097831,7.4179884],[-9.4098905,7.4183693],[-9.4101081,7.4186597],[-9.410468,7.4187982],[-9.4108897,7.418649],[-9.411298,7.418324],[-9.4119722,7.418095],[-9.4123966,7.4182148],[-9.4126008,7.4188648],[-9.4126142,7.419187],[-9.4126867,7.4197118],[-9.4125766,7.4201086],[-9.41212,7.4205348],[-9.4120189,7.4207611],[-9.4121152,7.4212199],[-9.4122334,7.4214714],[-9.4129778,7.4214731],[-9.4132224,7.4219883],[-9.4131487,7.4225298],[-9.4130451,7.4234559],[-9.413044,7.4244582],[-9.4131658,7.4248804],[-9.4131916,7.4249696],[-9.4133178,7.4252008],[-9.4132465,7.4254072],[-9.4130213,7.4257143],[-9.41297,7.4260688],[-9.4129528,7.4262413],[-9.4133699,7.4270304],[-9.4138211,7.4280109],[-9.4140651,7.4283186],[-9.4144754,7.4278214],[-9.4148514,7.4273167],[-9.4150451,7.4271246],[-9.4154701,7.4272452],[-9.4159293,7.4271959],[-9.4161563,7.4273184],[-9.416304,7.4273011],[-9.4164263,7.427136],[-9.417391,7.4275885],[-9.4178968,7.4274516],[-9.419082,7.4263517],[-9.419534,7.425911],[-9.4199177,7.4257264],[-9.4203658,7.4257905],[-9.4205482,7.426034],[-9.4206659,7.4263743],[-9.4210383,7.4261446],[-9.4214675,7.425685],[-9.4219537,7.4251388],[-9.4226602,7.4250333],[-9.4231427,7.4243629],[-9.4233745,7.4237489],[-9.423758,7.4228787],[-9.4239566,7.4198283],[-9.4243275,7.4189816],[-9.4248593,7.4181718],[-9.424948,7.4178149],[-9.4254181,7.416928],[-9.426026,7.4161765],[-9.4264844,7.4156894],[-9.4281336,7.4149276],[-9.4294982,7.4143308],[-9.429928,7.4142243],[-9.4304598,7.4143149],[-9.4314564,7.4148955],[-9.4317196,7.4152898],[-9.4316631,7.4157213],[-9.4317626,7.4161342],[-9.4320124,7.4166829],[-9.4322783,7.4171943],[-9.4328424,7.4175113],[-9.4332533,7.4179774],[-9.4338201,7.4180333],[-9.4350127,7.416555],[-9.436063,7.4158918],[-9.4361387,7.4153971],[-9.4361328,7.4145732],[-9.4360602,7.4141099],[-9.4360379,7.413413],[-9.4361489,7.4127859],[-9.4363208,7.4123731],[-9.4368876,7.4120243],[-9.4376209,7.4117179],[-9.4380721,7.4111612],[-9.4385875,7.4104102],[-9.43968,7.409573],[-9.4407045,7.4090329],[-9.4418756,7.408343],[-9.4432912,7.4077437],[-9.4447592,7.4068888],[-9.4455556,7.4065658],[-9.4462699,7.4063054],[-9.4467749,7.4053731],[-9.447852,7.405501],[-9.4484135,7.4056448],[-9.4490796,7.4056875],[-9.4495478,7.4055462],[-9.4504868,7.4049932],[-9.4511639,7.4044435],[-9.4512257,7.4036844],[-9.4510753,7.4027228],[-9.4511747,7.401969],[-9.4514916,7.4013323],[-9.452213,7.4008643],[-9.4526627,7.4002988],[-9.4532107,7.3998034],[-9.4537694,7.3996169],[-9.4541857,7.399838],[-9.4541454,7.4002509],[-9.4541374,7.4005892],[-9.4543684,7.4008129],[-9.4548683,7.4008827],[-9.4554545,7.4007627],[-9.4560101,7.4005652],[-9.4566712,7.3999635],[-9.4576443,7.3995177],[-9.4583033,7.399022],[-9.4589661,7.3987662],[-9.4600365,7.3983292],[-9.4601492,7.3983529],[-9.4612482,7.3985843],[-9.4630946,7.3980669],[-9.4634436,7.3979158],[-9.4637125,7.3975364],[-9.4638797,7.3968042],[-9.4641019,7.3964493],[-9.4645584,7.3962991],[-9.46532,7.396301],[-9.4662529,7.3962097],[-9.4673999,7.3959061],[-9.468016,7.3953729],[-9.4684567,7.3946954],[-9.4685184,7.3939281],[-9.4684652,7.3931247],[-9.4685037,7.3922276],[-9.4685585,7.3914088],[-9.4684925,7.3910217],[-9.4683018,7.3906968],[-9.4681543,7.3903004],[-9.4681283,7.3900899],[-9.4682204,7.3893517],[-9.4681037,7.388838],[-9.4677079,7.3885969],[-9.467424,7.387908],[-9.4673207,7.3871095],[-9.4673923,7.3864291],[-9.46756,7.3857009],[-9.4681401,7.3850534],[-9.4687151,7.3841773],[-9.4686963,7.3837331],[-9.4686184,7.3832957],[-9.4684949,7.3823634],[-9.4685251,7.3819938],[-9.4690863,7.3818058],[-9.4696962,7.3818305],[-9.4699274,7.3816124],[-9.4703681,7.3802923],[-9.4704852,7.3798231],[-9.4703978,7.3772845],[-9.4704818,7.3767538],[-9.4709243,7.3760983],[-9.4714671,7.3754746],[-9.4719217,7.3751327],[-9.4725992,7.3748655],[-9.4731212,7.3747017],[-9.4736794,7.3739966],[-9.4737541,7.3734923],[-9.4739408,7.3730954],[-9.4740247,7.3726068],[-9.4740321,7.3720037],[-9.4741331,7.3715528],[-9.4744107,7.3707827],[-9.4745154,7.3698625],[-9.4750234,7.3683667],[-9.4750707,7.3675258],[-9.475253,7.3670067],[-9.4755233,7.3667272],[-9.4763091,7.3666372],[-9.47685,7.3667911],[-9.4774198,7.3671879],[-9.4776276,7.3673503],[-9.4781741,7.3676152],[-9.4790832,7.3670243],[-9.47984,7.3664096],[-9.4803349,7.36579],[-9.4809892,7.3658751]]]]}]}
