# Supplementary material
Source: ML conference proceedings conference paper supplement (https://proceedings.neurips.cc/paper_files/paper/2022/hash/9d3faa41886997cfc2128b930077fa49-Abstract.html)
Supplement: Supplementary file 1 [file 9d3faa41886997cfc2128b930077fa49-Supplemental-Conference.zip › code/ebola/map/overall_data/observation.json]

{"BEYLA": 31, "KANKAN": 51, "KEROUANE": 34, "LOLA": 26, "MACENTA": 158, "NZEREKORE": 94, "BOFFA": 19, "BOKE": 49, "DUBREKA": 50, "FRIA": 3, "TELIMELE": 30, "CONAKRY": 636, "COYAH": 121, "FORECARIAH": 86, "KINDIA": 142, "DABOLA": 5, "DINGUIRAYE": 10, "FARANAH": 32, "KOUROUSSA": 27, "DALABA": 30, "PITA": 26, "TOUGUE": 4, "SIGUIRI": 53, "GUECKEDOU": 250, "KISSIDOUGO": 67, "KOINADUGU": 78, "BOMBALI": 161, "KAMBIA": 64, "LOFA": 94, "KAILAHUN": 106, "KONO": 146, "NIMBA": 137, "YOMOU": 68, "BONG": 131, "BOMI": 31, "GBARPOLU": 35, "GRAND_CAPE_MOUNT": 20, "MONTSERRADO": 400, "GRAND_BASSA": 46, "MARGIBI": 80, "KENEMA": 208, "RIVERCESS": 3, "PUJEHUN": 52, "GRAND_GEDEH": 13, "RIVER_GEE": 2, "SINOE": 11, "GRAND_KRU": 0, "MARYLAND": 0, "BO": 171, "BONTHE": 24, "MOYAMBA": 105, "TONKOLILI": 148, "PORT_LOKO": 180, "WESTERN": 370, "MALI": 4}
