# Supplementary material
Source: ML conference proceedings conference paper supplement (https://proceedings.neurips.cc/paper_files/paper/2022/hash/9d3faa41886997cfc2128b930077fa49-Abstract.html)
Supplement: Supplementary file 1 [file 9d3faa41886997cfc2128b930077fa49-Supplemental-Conference.zip › code/ebola/map/overall_data/percentage_0.1_bet_0.5.json]

{"BEYLA": 24.7, "KANKAN": 39.89, "KEROUANE": 35.0, "LOLA": 13.75, "MACENTA": 129.19, "NZEREKORE": 67.71, "BOFFA": 7.92, "BOKE": 16.53, "DUBREKA": 36.47, "FRIA": 3.69, "TELIMELE": 21.5, "CONAKRY": 577.35, "COYAH": 85.2, "FORECARIAH": 58.03, "KINDIA": 93.95, "DABOLA": 5.38, "DINGUIRAYE": 5.51, "FARANAH": 24.35, "KOUROUSSA": 14.61, "DALABA": 10.8, "PITA": 14.17, "TOUGUE": 0.91, "SIGUIRI": 24.26, "GUECKEDOU": 223.47, "KISSIDOUGO": 59.76, "KOINADUGU": 73.11, "BOMBALI": 123.35, "KAMBIA": 49.16, "LOFA": 76.28, "KAILAHUN": 95.08, "KONO": 120.91, "NIMBA": 115.02, "YOMOU": 55.66, "BONG": 103.83, "BOMI": 25.5, "GBARPOLU": 23.63, "GRAND_CAPE_MOUNT": 10.86, "MONTSERRADO": 335.01, "GRAND_BASSA": 32.96, "MARGIBI": 67.26, "KENEMA": 176.29, "RIVERCESS": 5.23, "PUJEHUN": 51.8, "GRAND_GEDEH": 9.49, "RIVER_GEE": 0.56, "SINOE": 6.47, "GRAND_KRU": 0.11, "MARYLAND": 0.03, "BO": 146.26, "BONTHE": 19.56, "MOYAMBA": 92.87, "TONKOLILI": 133.98, "PORT_LOKO": 159.15, "WESTERN": 335.84, "MALI": 1.75}
