# Supplementary material
Source: ML conference proceedings conference paper supplement (https://proceedings.neurips.cc/paper_files/paper/2022/hash/9d3faa41886997cfc2128b930077fa49-Abstract.html)
Supplement: Supplementary file 1 [file 9d3faa41886997cfc2128b930077fa49-Supplemental-Conference.zip › code/ebola/map/overall_data/percentage_0.2_bet_0.1.json]

{"BEYLA": 11.14, "KANKAN": 17.94, "KEROUANE": 17.65, "LOLA": 6.11, "MACENTA": 77.09, "NZEREKORE": 33.15, "BOFFA": 2.28, "BOKE": 4.61, "DUBREKA": 16.68, "FRIA": 1.29, "TELIMELE": 7.98, "CONAKRY": 330.05, "COYAH": 39.93, "FORECARIAH": 29.29, "KINDIA": 43.91, "DABOLA": 2.38, "DINGUIRAYE": 1.36, "FARANAH": 13.88, "KOUROUSSA": 6.15, "DALABA": 4.73, "PITA": 4.91, "TOUGUE": 0.21, "SIGUIRI": 8.64, "GUECKEDOU": 156.33, "KISSIDOUGO": 34.77, "KOINADUGU": 50.32, "BOMBALI": 83.83, "KAMBIA": 31.1, "LOFA": 46.89, "KAILAHUN": 62.17, "KONO": 85.66, "NIMBA": 52.82, "YOMOU": 28.38, "BONG": 53.99, "BOMI": 12.24, "GBARPOLU": 12.41, "GRAND_CAPE_MOUNT": 7.1, "MONTSERRADO": 185.45, "GRAND_BASSA": 14.55, "MARGIBI": 33.53, "KENEMA": 124.05, "RIVERCESS": 2.22, "PUJEHUN": 35.37, "GRAND_GEDEH": 3.52, "RIVER_GEE": 0.13, "SINOE": 2.68, "GRAND_KRU": 0.0, "MARYLAND": 0.0, "BO": 104.27, "BONTHE": 11.87, "MOYAMBA": 70.15, "TONKOLILI": 101.83, "PORT_LOKO": 120.5, "WESTERN": 252.4, "MALI": 0.58}
