# Supplementary material
Source: ML conference proceedings conference paper supplement (https://proceedings.neurips.cc/paper_files/paper/2022/hash/9d3faa41886997cfc2128b930077fa49-Abstract.html)
Supplement: Supplementary file 1 [file 9d3faa41886997cfc2128b930077fa49-Supplemental-Conference.zip › code/ebola/map/overall_data/percentage_0.5_bet_0.3.json]

{"BEYLA": 3.1, "KANKAN": 4.2, "KEROUANE": 5.09, "LOLA": 0.84, "MACENTA": 30.03, "NZEREKORE": 9.25, "BOFFA": 0.57, "BOKE": 0.62, "DUBREKA": 5.36, "FRIA": 0.2, "TELIMELE": 1.95, "CONAKRY": 109.65, "COYAH": 12.18, "FORECARIAH": 11.67, "KINDIA": 17.65, "DABOLA": 0.54, "DINGUIRAYE": 0.22, "FARANAH": 5.82, "KOUROUSSA": 1.81, "DALABA": 1.39, "PITA": 1.71, "TOUGUE": 0.03, "SIGUIRI": 1.65, "GUECKEDOU": 77.82, "KISSIDOUGO": 12.83, "KOINADUGU": 26.4, "BOMBALI": 47.49, "KAMBIA": 16.73, "LOFA": 17.28, "KAILAHUN": 31.54, "KONO": 44.35, "NIMBA": 9.54, "YOMOU": 7.74, "BONG": 13.41, "BOMI": 2.85, "GBARPOLU": 4.62, "GRAND_CAPE_MOUNT": 2.68, "MONTSERRADO": 53.04, "GRAND_BASSA": 2.26, "MARGIBI": 7.74, "KENEMA": 68.91, "RIVERCESS": 0.39, "PUJEHUN": 17.91, "GRAND_GEDEH": 0.59, "RIVER_GEE": 0.0, "SINOE": 0.29, "GRAND_KRU": 0.0, "MARYLAND": 0.0, "BO": 60.29, "BONTHE": 6.44, "MOYAMBA": 46.31, "TONKOLILI": 63.58, "PORT_LOKO": 82.38, "WESTERN": 185.74, "MALI": 0.22}
