# Supplementary material
Source: ML conference proceedings conference paper supplement (https://proceedings.neurips.cc/paper_files/paper/2022/hash/9d3faa41886997cfc2128b930077fa49-Abstract.html)
Supplement: Supplementary file 1 [file 9d3faa41886997cfc2128b930077fa49-Supplemental-Conference.zip › code/ebola/map/overall_data/percentage_0.8_bet_0.1.json]

{"BEYLA": 0.15, "KANKAN": 0.31, "KEROUANE": 0.14, "LOLA": 0.0, "MACENTA": 1.59, "NZEREKORE": 0.29, "BOFFA": 0.0, "BOKE": 0.0, "DUBREKA": 0.0, "FRIA": 0.0, "TELIMELE": 0.01, "CONAKRY": 0.0, "COYAH": 0.01, "FORECARIAH": 0.14, "KINDIA": 0.11, "DABOLA": 0.03, "DINGUIRAYE": 0.0, "FARANAH": 0.55, "KOUROUSSA": 0.05, "DALABA": 0.0, "PITA": 0.0, "TOUGUE": 0.0, "SIGUIRI": 0.0, "GUECKEDOU": 7.0, "KISSIDOUGO": 0.64, "KOINADUGU": 1.17, "BOMBALI": 1.76, "KAMBIA": 0.58, "LOFA": 0.64, "KAILAHUN": 0.99, "KONO": 1.5, "NIMBA": 0.06, "YOMOU": 0.21, "BONG": 0.13, "BOMI": 0.0, "GBARPOLU": 0.03, "GRAND_CAPE_MOUNT": 0.09, "MONTSERRADO": 0.05, "GRAND_BASSA": 0.0, "MARGIBI": 0.01, "KENEMA": 0.9, "RIVERCESS": 0.0, "PUJEHUN": 1.69, "GRAND_GEDEH": 0.0, "RIVER_GEE": 0.0, "SINOE": 0.0, "GRAND_KRU": 0.0, "MARYLAND": 0.0, "BO": 1.46, "BONTHE": 0.28, "MOYAMBA": 2.24, "TONKOLILI": 3.67, "PORT_LOKO": 4.12, "WESTERN": 13.33, "MALI": 0.0}
