# Supplementary material
Source: ML conference proceedings conference paper supplement (https://proceedings.neurips.cc/paper_files/paper/2022/hash/9d3faa41886997cfc2128b930077fa49-Abstract.html)
Supplement: Supplementary file 1 [file 9d3faa41886997cfc2128b930077fa49-Supplemental-Conference.zip › code/ebola/map/overall_data/percentage_0.8_bet_0.4.json]

{"BEYLA": 2.35, "KANKAN": 2.19, "KEROUANE": 2.51, "LOLA": 0.45, "MACENTA": 19.22, "NZEREKORE": 5.67, "BOFFA": 0.17, "BOKE": 0.18, "DUBREKA": 1.5, "FRIA": 0.12, "TELIMELE": 0.76, "CONAKRY": 34.47, "COYAH": 3.62, "FORECARIAH": 4.96, "KINDIA": 7.32, "DABOLA": 0.29, "DINGUIRAYE": 0.23, "FARANAH": 3.25, "KOUROUSSA": 1.21, "DALABA": 0.61, "PITA": 0.48, "TOUGUE": 0.02, "SIGUIRI": 0.6, "GUECKEDOU": 50.6, "KISSIDOUGO": 7.27, "KOINADUGU": 14.88, "BOMBALI": 26.98, "KAMBIA": 8.33, "LOFA": 11.62, "KAILAHUN": 17.95, "KONO": 25.44, "NIMBA": 5.32, "YOMOU": 4.93, "BONG": 6.49, "BOMI": 1.19, "GBARPOLU": 1.94, "GRAND_CAPE_MOUNT": 1.44, "MONTSERRADO": 19.86, "GRAND_BASSA": 1.22, "MARGIBI": 2.42, "KENEMA": 40.79, "RIVERCESS": 0.1, "PUJEHUN": 10.96, "GRAND_GEDEH": 0.21, "RIVER_GEE": 0.01, "SINOE": 0.18, "GRAND_KRU": 0.0, "MARYLAND": 0.0, "BO": 38.04, "BONTHE": 3.89, "MOYAMBA": 33.58, "TONKOLILI": 42.55, "PORT_LOKO": 58.32, "WESTERN": 142.17, "MALI": 0.06}
