# Supplementary material
Source: ML conference proceedings conference paper supplement (https://proceedings.neurips.cc/paper_files/paper/2022/hash/9d3faa41886997cfc2128b930077fa49-Abstract.html)
Supplement: Supplementary file 1 [file 9d3faa41886997cfc2128b930077fa49-Supplemental-Conference.zip › code/ebola/map/overall_data/percentage_0.25_0.json]

{"BEYLA": 7.96, "KANKAN": 11.4, "KEROUANE": 12.06, "LOLA": 2.9, "MACENTA": 70.36, "NZEREKORE": 20.19, "BOFFA": 1.8, "BOKE": 3.41, "DUBREKA": 17.12, "FRIA": 1.13, "TELIMELE": 6.84, "CONAKRY": 353.33, "COYAH": 41.32, "FORECARIAH": 29.84, "KINDIA": 41.82, "DABOLA": 1.42, "DINGUIRAYE": 1.05, "FARANAH": 14.01, "KOUROUSSA": 4.78, "DALABA": 4.74, "PITA": 4.76, "TOUGUE": 0.2, "SIGUIRI": 4.68, "GUECKEDOU": 149.28, "KISSIDOUGO": 27.59, "KOINADUGU": 52.42, "BOMBALI": 86.93, "KAMBIA": 35.76, "LOFA": 37.59, "KAILAHUN": 63.59, "KONO": 90.08, "NIMBA": 30.32, "YOMOU": 18.51, "BONG": 39.84, "BOMI": 9.13, "GBARPOLU": 12.93, "GRAND_CAPE_MOUNT": 6.83, "MONTSERRADO": 153.68, "GRAND_BASSA": 8.64, "MARGIBI": 23.69, "KENEMA": 137.38, "RIVERCESS": 1.0, "PUJEHUN": 31.36, "GRAND_GEDEH": 1.71, "RIVER_GEE": 0.06, "SINOE": 0.96, "GRAND_KRU": 0.0, "MARYLAND": 0.0, "BO": 112.82, "BONTHE": 13.17, "MOYAMBA": 80.71, "TONKOLILI": 114.67, "PORT_LOKO": 150.82, "WESTERN": 336.12, "MALI": 0.31}
