# Supplementary material
Source: ML conference proceedings conference paper supplement (https://proceedings.neurips.cc/paper_files/paper/2022/hash/9d3faa41886997cfc2128b930077fa49-Abstract.html)
Supplement: Supplementary file 1 [file 9d3faa41886997cfc2128b930077fa49-Supplemental-Conference.zip › code/ebola/map/overall_data/percentage_0.25_1.json]

{"BEYLA": 8.86, "KANKAN": 16.3, "KEROUANE": 17.11, "LOLA": 3.43, "MACENTA": 77.53, "NZEREKORE": 24.01, "BOFFA": 4.96, "BOKE": 8.09, "DUBREKA": 32.44, "FRIA": 2.57, "TELIMELE": 14.22, "CONAKRY": 536.91, "COYAH": 71.77, "FORECARIAH": 57.83, "KINDIA": 89.55, "DABOLA": 2.46, "DINGUIRAYE": 1.47, "FARANAH": 17.83, "KOUROUSSA": 5.35, "DALABA": 10.27, "PITA": 8.95, "TOUGUE": 0.95, "SIGUIRI": 6.45, "GUECKEDOU": 166.89, "KISSIDOUGO": 33.55, "KOINADUGU": 61.58, "BOMBALI": 124.39, "KAMBIA": 50.29, "LOFA": 41.54, "KAILAHUN": 73.62, "KONO": 109.34, "NIMBA": 36.1, "YOMOU": 22.42, "BONG": 44.31, "BOMI": 10.87, "GBARPOLU": 12.87, "GRAND_CAPE_MOUNT": 10.97, "MONTSERRADO": 169.15, "GRAND_BASSA": 9.2, "MARGIBI": 26.19, "KENEMA": 172.11, "RIVERCESS": 1.0, "PUJEHUN": 37.28, "GRAND_GEDEH": 2.08, "RIVER_GEE": 0.11, "SINOE": 1.55, "GRAND_KRU": 0.0, "MARYLAND": 0.01, "BO": 146.32, "BONTHE": 15.58, "MOYAMBA": 99.05, "TONKOLILI": 132.27, "PORT_LOKO": 168.28, "WESTERN": 358.79, "MALI": 0.91}
