# Supplementary material
Source: ML conference proceedings conference paper supplement (https://proceedings.neurips.cc/paper_files/paper/2022/hash/9d3faa41886997cfc2128b930077fa49-Abstract.html)
Supplement: Supplementary file 1 [file 9d3faa41886997cfc2128b930077fa49-Supplemental-Conference.zip › code/ebola/map/overall_data/percentage_0.25_2.json]

{"BEYLA": 14.37, "KANKAN": 24.06, "KEROUANE": 28.35, "LOLA": 9.16, "MACENTA": 114.3, "NZEREKORE": 48.08, "BOFFA": 8.26, "BOKE": 17.52, "DUBREKA": 36.18, "FRIA": 1.88, "TELIMELE": 19.52, "CONAKRY": 576.05, "COYAH": 82.25, "FORECARIAH": 64.35, "KINDIA": 93.47, "DABOLA": 5.91, "DINGUIRAYE": 3.07, "FARANAH": 26.11, "KOUROUSSA": 13.38, "DALABA": 8.91, "PITA": 8.5, "TOUGUE": 0.25, "SIGUIRI": 11.3, "GUECKEDOU": 216.42, "KISSIDOUGO": 50.84, "KOINADUGU": 74.26, "BOMBALI": 149.99, "KAMBIA": 60.54, "LOFA": 65.38, "KAILAHUN": 92.31, "KONO": 136.92, "NIMBA": 71.12, "YOMOU": 42.84, "BONG": 83.04, "BOMI": 19.18, "GBARPOLU": 23.05, "GRAND_CAPE_MOUNT": 13.61, "MONTSERRADO": 286.35, "GRAND_BASSA": 21.43, "MARGIBI": 55.34, "KENEMA": 201.35, "RIVERCESS": 2.33, "PUJEHUN": 49.29, "GRAND_GEDEH": 4.25, "RIVER_GEE": 0.25, "SINOE": 2.82, "GRAND_KRU": 0.0, "MARYLAND": 0.01, "BO": 164.23, "BONTHE": 20.93, "MOYAMBA": 100.69, "TONKOLILI": 140.96, "PORT_LOKO": 177.74, "WESTERN": 368.57, "MALI": 1.08}
