# Supplementary material
Source: ML conference proceedings conference paper supplement (https://proceedings.neurips.cc/paper_files/paper/2022/hash/9d3faa41886997cfc2128b930077fa49-Abstract.html)
Supplement: Supplementary file 1 [file 9d3faa41886997cfc2128b930077fa49-Supplemental-Conference.zip › code/ebola/settings.py]

import os

PROJECT_DIR = os.path.abspath(os.path.join(os.path.dirname(os.path.realpath(__file__)), '..'))
DATA_DIR = os.path.join(PROJECT_DIR, 'data')

EBOLA_BASE_GRAPH_FILE = os.path.join(DATA_DIR, 'ebola', 'ebola_base_graph.json')
EBOLA_SCALED_GRAPH_FILE = os.path.join(DATA_DIR, 'ebola', 'ebola_scaled_graph.json')
