# Supplementary material
Source: ML conference proceedings conference paper supplement (https://proceedings.neurips.cc/paper_files/paper/2022/hash/9d3faa41886997cfc2128b930077fa49-Abstract.html)
Supplement: Supplementary file 1 [file 9d3faa41886997cfc2128b930077fa49-Supplemental-Conference.zip › code/README.md]

# Counterfactual Temporal Point Processes

## Pre-requisites

This code depends on the following packages:

 1. [`networkx`](https://networkx.org/)
 2. `numpy`
 3. `pandas`
 4. `matplotlib`
 
 
 to generate map plots:
 
 5. [`GeoPandas`](https://geopandas.org/)
 6. `geoplot`

In order to install the project dependencies you can run the following command:
```bash
pip install -r requirements.txt
```
## Code structure

 - **src/counterfactual_tpp.py:** Contains the code to sample rejected events using the superposition property and the algorithm to calculate the counterfactuals.
 - **src/gumbel.py:** Contains the utility functions for the Gumbel-Max SCM.
 - **src/sampling_utils.py:** Contains the code for the Lewis' thinning algorithm (`thinning_T` function) and some other sampling utilities.
 - **src/hawkes/hawkes.py:** Contains the code for sampling from the hawkes process using the superposition property of tpps. It also includes the algorithm for sampling a counterfactual sequence of events given a sequence of observed events for a Hawkes process.
 - **src/hawkes/hawkes_example.ipynb:** Contains an example of running algorithm 3 (in the paper) for both cases where we have (1) both observed and un-observed events, and (2) the case that we have only the observed events.
 - **ebola/graph_generation.py:** Contains code to build the Ebola network based on the network of connected
    districts. 
 - **ebola/dynamics.py:** Contains code for sampling counterfactual sequence of infections given a sequence of observed infections from the SIR porcess (the ` calculate_counterfactual` function). The rest of the code simulates continuous-time SIR epidemics with exponentially distributed
    inter-event times.

The directory **ebola/data/ebola** contains the information about the Ebola network adjanceny matrix and the cleaned ebola outbreak data.

The directory **ebola/map/geojson** contains the geographical information of the districts studied in the Ebola outbreak dataset. The geojson files are obtained from [Nominatim](https://nominatim.openstreetmap.org/ui/search.html).

The directory **ebola/map/overall_data** contains data for generating the geographical maps in the paper, and includs the overall number of infection under applying different interventions.

The directories **src/data_hawkes** and **src/data_inhomogeneous** contain observational data used to generate Synthetic plots in the paper. You can use this data to re-generate paper's plots. Otherwise, you can simply generate new random samples by the code (which is commented in the corresponding notebooks).

## Experiments 

### Synthetic
 - **Inhomogeneous Poisson Processes:** `src/inhomogeneous_experiments.ipynb`
 - **Hawkes Processes:** `src/hawkes_experiments.ipynb`

### Epidemiological
- **Ebola Epidemic Simulation and Counterfactual Calculations:** `ebola/ebola_experiments.ipynb`
- **Generate Geographical Distribution of infections:** `ebola/map/generate_geopands_data.ipynb`

## Execution run-time
In what follows, we
report detailed run time of the submitted code on a machine equipped with 48 Intel(R) Xeon(R) 3.00GHz CPU cores
and 1.5 TB memory. 

Regarding ebola/ebola experiments.ipynb, it takes ∼1 minute to generate Figure 1(a),
∼6 minutes to generate each of the plots in Figure 1(b) and 55 minutes to generate Figure 3 (note that it combines
40 different experiments.). Regarding src/hawkes experiments.ipynb, it takes ∼3 minutes to generate each
of the plots in Figures 6 and 7 using the pre-saved data, which is available in supplementary materials. Regarding
src/inhomogeneous experiments.ipynb, it takes ∼30 minutes to generate each row of plots in Figure 5.
