# Supplementary material
Source: ML conference proceedings conference paper supplement (https://proceedings.neurips.cc/paper_files/paper/2022/hash/9d3faa41886997cfc2128b930077fa49-Abstract.html)
Supplement: Supplementary file 1 [file 9d3faa41886997cfc2128b930077fa49-Supplemental-Conference.zip › code/requirements.txt]

networkx==2.2
numpy==1.20.2
pandas==1.3.2
matplotlib==3.5.2
geopandas==0.10.2
