# Supplementary material
Source: ML conference proceedings conference paper supplement (https://proceedings.neurips.cc/paper_files/paper/2022/hash/9d3faa41886997cfc2128b930077fa49-Abstract.html)
Supplement: Supplementary file 1 [file 9d3faa41886997cfc2128b930077fa49-Supplemental-Conference.zip › code/src/data_hawkes/allevents.json]

[{"1": {"0.15438531024406338": false, "0.6012080300557974": true, "1.5692350069948657": true, "1.8039781042536593": true, "1.8601032113401863": false, "2.248209298294838": true, "3.6613685875205926": true, "4.017926338388645": true, "4.678580808747876": true}, "0.6012080300557974": {"0.8072079279572177": true, "1.0021931466850718": true, "1.1059777208710153": true, "3.3208500221945068": false, "3.460027174762763": true, "3.612596681020749": false, "4.620545836972225": false}, "0.8072079279572177": {"0.8083036096636488": true, "1.489025245752687": false, "1.688949493364202": false, "3.0515786960742908": false, "3.053056474424691": false}, "0.8083036096636488": {"1.1476826151544048": false, "1.6747920077805454": false, "2.117095042646968": true, "2.177428392257466": true, "2.3703241262220045": false, "3.036348670585614": false, "3.5929484664661198": false, "4.706811303158679": false}, "2.117095042646968": {"3.2783539040267176": true, "3.576971637172915": true, "4.103936774892654": false, "4.138934754323617": false, "4.442190056783633": false}, "3.2783539040267176": {"3.567694636810174": false, "4.021070139114411": false}, "3.576971637172915": {}, "2.177428392257466": {"2.2563865457084535": false, "2.5395138616750006": true, "2.8618801729804586": false}, "2.5395138616750006": {"2.8491400771911453": true, "4.158487664300259": true, "4.5923126054172165": false}, "2.8491400771911453": {"3.2435989817729287": false, "3.2573337503387174": false, "3.610654155440974": false, "4.688300977706366": true, "4.829175010449133": false}, "4.688300977706366": {"4.957327103164111": true}, "4.957327103164111": {}, "4.158487664300259": {"4.50763294512385": false, "4.774870029158423": true}, "4.774870029158423": {}, "1.0021931466850718": {"2.492046262395359": false, "3.4716351315431693": false, "4.29699746428578": false}, "1.1059777208710153": {"3.548105315019394": false, "3.6059101012223125": false, "3.7728195297940323": false, "4.881077149240405": false}, "3.460027174762763": {"4.578399834661159": false, "4.622066521779834": false, "4.681338671145914": false, "4.805759284172403": false}, "1.5692350069948657": {"2.677391755199446": false, "4.318714079233654": false}, "1.8039781042536593": {"2.368138499024213": true, "3.5328123356929675": false}, "2.368138499024213": {"2.4439498578978003": true, "2.8707689926368425": false, "3.0553596367453757": true, "3.579207733296172": false}, "2.4439498578978003": {"2.853933198949305": true, "3.522023920285092": false}, "2.853933198949305": {"3.8912299209096823": false, "4.049341709219163": false, "4.969750888219265": false}, "3.0553596367453757": {"3.2197178301776654": true, "3.587308860929409": true, "3.890412098877804": false, "4.411134441601339": false, "4.507328086745075": false, "4.605153639252816": false}, "3.2197178301776654": {"3.8328173336065685": false, "4.3815248859995455": false}, "3.587308860929409": {"4.452317024354366": false}, "2.248209298294838": {"2.8674629212075056": true, "3.8689948923724957": false, "4.11562787796857": false, "4.164916473588119": false, "4.173537356469909": false, "4.215047557429487": false, "4.500527584436251": false}, "2.8674629212075056": {"3.5209127298982548": true}, "3.5209127298982548": {"4.395263126807089": false}, "3.6613685875205926": {"4.136221404276677": true, "4.820040311128146": false}, "4.136221404276677": {"4.269727354097138": true}, "4.269727354097138": {}, "4.017926338388645": {"4.939951875899513": false}, "4.678580808747876": {}}, {"1": {"0.15438531024406338": false, "0.6012080300557974": true, "1.5692350069948657": true, "1.8039781042536593": true, "1.8601032113401863": false, "2.248209298294838": true, "3.6613685875205926": true, "4.017926338388645": true, "4.678580808747876": true}, "0.6012080300557974": {"0.8072079279572177": true, "1.0021931466850718": true, "1.1059777208710153": true, "3.3208500221945068": false, "3.460027174762763": true, "3.612596681020749": false, "4.620545836972225": false}, "0.8072079279572177": {"0.8083036096636488": true, "1.489025245752687": false, "1.688949493364202": false, "3.0515786960742908": false, "3.053056474424691": false}, "0.8083036096636488": {"1.1476826151544048": false, "1.6747920077805454": false, "2.117095042646968": true, "2.177428392257466": true, "2.3703241262220045": false, "3.036348670585614": false, "3.5929484664661198": false, "4.706811303158679": false}, "2.117095042646968": {"3.2783539040267176": true, "3.576971637172915": true, "4.103936774892654": false, "4.138934754323617": false, "4.442190056783633": false}, "3.2783539040267176": {"3.567694636810174": false, "4.021070139114411": false}, "3.576971637172915": {}, "2.177428392257466": {"2.2563865457084535": false, "2.5395138616750006": true, "2.8618801729804586": false}, "2.5395138616750006": {"2.8491400771911453": true, "4.158487664300259": true, "4.5923126054172165": false}, "2.8491400771911453": {"3.2435989817729287": false, "3.2573337503387174": false, "3.610654155440974": false, "4.688300977706366": true, "4.829175010449133": false}, "4.688300977706366": {"4.957327103164111": true}, "4.957327103164111": {}, "4.158487664300259": {"4.50763294512385": false, "4.774870029158423": true}, "4.774870029158423": {}, "1.0021931466850718": {"2.492046262395359": false, "3.4716351315431693": false, "4.29699746428578": false}, "1.1059777208710153": {"3.548105315019394": false, "3.6059101012223125": false, "3.7728195297940323": false, "4.881077149240405": false}, "3.460027174762763": {"4.578399834661159": false, "4.622066521779834": false, "4.681338671145914": false, "4.805759284172403": false}, "1.5692350069948657": {"2.677391755199446": false, "4.318714079233654": false}, "1.8039781042536593": {"2.368138499024213": true, "3.5328123356929675": false}, "2.368138499024213": {"2.4439498578978003": true, "2.8707689926368425": false, "3.0553596367453757": true, "3.579207733296172": false}, "2.4439498578978003": {"2.853933198949305": true, "3.522023920285092": false}, "2.853933198949305": {"3.8912299209096823": false, "4.049341709219163": false, "4.969750888219265": false}, "3.0553596367453757": {"3.2197178301776654": true, "3.587308860929409": true, "3.890412098877804": false, "4.411134441601339": false, "4.507328086745075": false, "4.605153639252816": false}, "3.2197178301776654": {"3.8328173336065685": false, "4.3815248859995455": false}, "3.587308860929409": {"4.452317024354366": false}, "2.248209298294838": {"2.8674629212075056": true, "3.8689948923724957": false, "4.11562787796857": false, "4.164916473588119": false, "4.173537356469909": false, "4.215047557429487": false, "4.500527584436251": false}, "2.8674629212075056": {"3.5209127298982548": true}, "3.5209127298982548": {"4.395263126807089": false}, "3.6613685875205926": {"4.136221404276677": true, "4.820040311128146": false}, "4.136221404276677": {"4.269727354097138": true}, "4.269727354097138": {}, "4.017926338388645": {"4.939951875899513": false}, "4.678580808747876": {}}, {"1": {"0.15438531024406338": false, "0.6012080300557974": true, "1.5692350069948657": true, "1.8039781042536593": true, "1.8601032113401863": false, "2.248209298294838": true, "3.6613685875205926": true, "4.017926338388645": true, "4.678580808747876": true}, "0.6012080300557974": {"0.8072079279572177": true, "1.0021931466850718": true, "1.1059777208710153": true, "3.3208500221945068": false, "3.460027174762763": true, "3.612596681020749": false, "4.620545836972225": false}, "0.8072079279572177": {"0.8083036096636488": true, "1.489025245752687": false, "1.688949493364202": false, "3.0515786960742908": false, "3.053056474424691": false}, "0.8083036096636488": {"1.1476826151544048": false, "1.6747920077805454": false, "2.117095042646968": true, "2.177428392257466": true, "2.3703241262220045": false, "3.036348670585614": false, "3.5929484664661198": false, "4.706811303158679": false}, "2.117095042646968": {"3.2783539040267176": true, "3.576971637172915": true, "4.103936774892654": false, "4.138934754323617": false, "4.442190056783633": false}, "3.2783539040267176": {"3.567694636810174": false, "4.021070139114411": false}, "3.576971637172915": {}, "2.177428392257466": {"2.2563865457084535": false, "2.5395138616750006": true, "2.8618801729804586": false}, "2.5395138616750006": {"2.8491400771911453": true, "4.158487664300259": true, "4.5923126054172165": false}, "2.8491400771911453": {"3.2435989817729287": false, "3.2573337503387174": false, "3.610654155440974": false, "4.688300977706366": true, "4.829175010449133": false}, "4.688300977706366": {"4.957327103164111": true}, "4.957327103164111": {}, "4.158487664300259": {"4.50763294512385": false, "4.774870029158423": true}, "4.774870029158423": {}, "1.0021931466850718": {"2.492046262395359": false, "3.4716351315431693": false, "4.29699746428578": false}, "1.1059777208710153": {"3.548105315019394": false, "3.6059101012223125": false, "3.7728195297940323": false, "4.881077149240405": false}, "3.460027174762763": {"4.578399834661159": false, "4.622066521779834": false, "4.681338671145914": false, "4.805759284172403": false}, "1.5692350069948657": {"2.677391755199446": false, "4.318714079233654": false}, "1.8039781042536593": {"2.368138499024213": true, "3.5328123356929675": false}, "2.368138499024213": {"2.4439498578978003": true, "2.8707689926368425": false, "3.0553596367453757": true, "3.579207733296172": false}, "2.4439498578978003": {"2.853933198949305": true, "3.522023920285092": false}, "2.853933198949305": {"3.8912299209096823": false, "4.049341709219163": false, "4.969750888219265": false}, "3.0553596367453757": {"3.2197178301776654": true, "3.587308860929409": true, "3.890412098877804": false, "4.411134441601339": false, "4.507328086745075": false, "4.605153639252816": false}, "3.2197178301776654": {"3.8328173336065685": false, "4.3815248859995455": false}, "3.587308860929409": {"4.452317024354366": false}, "2.248209298294838": {"2.8674629212075056": true, "3.8689948923724957": false, "4.11562787796857": false, "4.164916473588119": false, "4.173537356469909": false, "4.215047557429487": false, "4.500527584436251": false}, "2.8674629212075056": {"3.5209127298982548": true}, "3.5209127298982548": {"4.395263126807089": false}, "3.6613685875205926": {"4.136221404276677": true, "4.820040311128146": false}, "4.136221404276677": {"4.269727354097138": true}, "4.269727354097138": {}, "4.017926338388645": {"4.939951875899513": false}, "4.678580808747876": {}}, {"1": {"0.15438531024406338": false, "0.6012080300557974": true, "1.5692350069948657": true, "1.8039781042536593": true, "1.8601032113401863": false, "2.248209298294838": true, "3.6613685875205926": true, "4.017926338388645": true, "4.678580808747876": true}, "0.6012080300557974": {"0.8072079279572177": true, "1.0021931466850718": true, "1.1059777208710153": true, "3.3208500221945068": false, "3.460027174762763": true, "3.612596681020749": false, "4.620545836972225": false}, "0.8072079279572177": {"0.8083036096636488": true, "1.489025245752687": false, "1.688949493364202": false, "3.0515786960742908": false, "3.053056474424691": false}, "0.8083036096636488": {"1.1476826151544048": false, "1.6747920077805454": false, "2.117095042646968": true, "2.177428392257466": true, "2.3703241262220045": false, "3.036348670585614": false, "3.5929484664661198": false, "4.706811303158679": false}, "2.117095042646968": {"3.2783539040267176": true, "3.576971637172915": true, "4.103936774892654": false, "4.138934754323617": false, "4.442190056783633": false}, "3.2783539040267176": {"3.567694636810174": false, "4.021070139114411": false}, "3.576971637172915": {}, "2.177428392257466": {"2.2563865457084535": false, "2.5395138616750006": true, "2.8618801729804586": false}, "2.5395138616750006": {"2.8491400771911453": true, "4.158487664300259": true, "4.5923126054172165": false}, "2.8491400771911453": {"3.2435989817729287": false, "3.2573337503387174": false, "3.610654155440974": false, "4.688300977706366": true, "4.829175010449133": false}, "4.688300977706366": {"4.957327103164111": true}, "4.957327103164111": {}, "4.158487664300259": {"4.50763294512385": false, "4.774870029158423": true}, "4.774870029158423": {}, "1.0021931466850718": {"2.492046262395359": false, "3.4716351315431693": false, "4.29699746428578": false}, "1.1059777208710153": {"3.548105315019394": false, "3.6059101012223125": false, "3.7728195297940323": false, "4.881077149240405": false}, "3.460027174762763": {"4.578399834661159": false, "4.622066521779834": false, "4.681338671145914": false, "4.805759284172403": false}, "1.5692350069948657": {"2.677391755199446": false, "4.318714079233654": false}, "1.8039781042536593": {"2.368138499024213": true, "3.5328123356929675": false}, "2.368138499024213": {"2.4439498578978003": true, "2.8707689926368425": false, "3.0553596367453757": true, "3.579207733296172": false}, "2.4439498578978003": {"2.853933198949305": true, "3.522023920285092": false}, "2.853933198949305": {"3.8912299209096823": false, "4.049341709219163": false, "4.969750888219265": false}, "3.0553596367453757": {"3.2197178301776654": true, "3.587308860929409": true, "3.890412098877804": false, "4.411134441601339": false, "4.507328086745075": false, "4.605153639252816": false}, "3.2197178301776654": {"3.8328173336065685": false, "4.3815248859995455": false}, "3.587308860929409": {"4.452317024354366": false}, "2.248209298294838": {"2.8674629212075056": true, "3.8689948923724957": false, "4.11562787796857": false, "4.164916473588119": false, "4.173537356469909": false, "4.215047557429487": false, "4.500527584436251": false}, "2.8674629212075056": {"3.5209127298982548": true}, "3.5209127298982548": {"4.395263126807089": false}, "3.6613685875205926": {"4.136221404276677": true, "4.820040311128146": false}, "4.136221404276677": {"4.269727354097138": true}, "4.269727354097138": {}, "4.017926338388645": {"4.939951875899513": false}, "4.678580808747876": {}}, {"1": {"0.15438531024406338": false, "0.6012080300557974": true, "1.5692350069948657": true, "1.8039781042536593": true, "1.8601032113401863": false, "2.248209298294838": true, "3.6613685875205926": true, "4.017926338388645": true, "4.678580808747876": true}, "0.6012080300557974": {"0.8072079279572177": true, "1.0021931466850718": true, "1.1059777208710153": true, "3.3208500221945068": false, "3.460027174762763": true, "3.612596681020749": false, "4.620545836972225": false}, "0.8072079279572177": {"0.8083036096636488": true, "1.489025245752687": false, "1.688949493364202": false, "3.0515786960742908": false, "3.053056474424691": false}, "0.8083036096636488": {"1.1476826151544048": false, "1.6747920077805454": false, "2.117095042646968": true, "2.177428392257466": true, "2.3703241262220045": false, "3.036348670585614": false, "3.5929484664661198": false, "4.706811303158679": false}, "2.117095042646968": {"3.2783539040267176": true, "3.576971637172915": true, "4.103936774892654": false, "4.138934754323617": false, "4.442190056783633": false}, "3.2783539040267176": {"3.567694636810174": false, "4.021070139114411": false}, "3.576971637172915": {}, "2.177428392257466": {"2.2563865457084535": false, "2.5395138616750006": true, "2.8618801729804586": false}, "2.5395138616750006": {"2.8491400771911453": true, "4.158487664300259": true, "4.5923126054172165": false}, "2.8491400771911453": {"3.2435989817729287": false, "3.2573337503387174": false, "3.610654155440974": false, "4.688300977706366": true, "4.829175010449133": false}, "4.688300977706366": {"4.957327103164111": true}, "4.957327103164111": {}, "4.158487664300259": {"4.50763294512385": false, "4.774870029158423": true}, "4.774870029158423": {}, "1.0021931466850718": {"2.492046262395359": false, "3.4716351315431693": false, "4.29699746428578": false}, "1.1059777208710153": {"3.548105315019394": false, "3.6059101012223125": false, "3.7728195297940323": false, "4.881077149240405": false}, "3.460027174762763": {"4.578399834661159": false, "4.622066521779834": false, "4.681338671145914": false, "4.805759284172403": false}, "1.5692350069948657": {"2.677391755199446": false, "4.318714079233654": false}, "1.8039781042536593": {"2.368138499024213": true, "3.5328123356929675": false}, "2.368138499024213": {"2.4439498578978003": true, "2.8707689926368425": false, "3.0553596367453757": true, "3.579207733296172": false}, "2.4439498578978003": {"2.853933198949305": true, "3.522023920285092": false}, "2.853933198949305": {"3.8912299209096823": false, "4.049341709219163": false, "4.969750888219265": false}, "3.0553596367453757": {"3.2197178301776654": true, "3.587308860929409": true, "3.890412098877804": false, "4.411134441601339": false, "4.507328086745075": false, "4.605153639252816": false}, "3.2197178301776654": {"3.8328173336065685": false, "4.3815248859995455": false}, "3.587308860929409": {"4.452317024354366": false}, "2.248209298294838": {"2.8674629212075056": true, "3.8689948923724957": false, "4.11562787796857": false, "4.164916473588119": false, "4.173537356469909": false, "4.215047557429487": false, "4.500527584436251": false}, "2.8674629212075056": {"3.5209127298982548": true}, "3.5209127298982548": {"4.395263126807089": false}, "3.6613685875205926": {"4.136221404276677": true, "4.820040311128146": false}, "4.136221404276677": {"4.269727354097138": true}, "4.269727354097138": {}, "4.017926338388645": {"4.939951875899513": false}, "4.678580808747876": {}}, {"1": {"0.15438531024406338": false, "0.6012080300557974": true, "1.5692350069948657": true, "1.8039781042536593": true, "1.8601032113401863": false, "2.248209298294838": true, "3.6613685875205926": true, "4.017926338388645": true, "4.678580808747876": true}, "0.6012080300557974": {"0.8072079279572177": true, "1.0021931466850718": true, "1.1059777208710153": true, "3.3208500221945068": false, "3.460027174762763": true, "3.612596681020749": false, "4.620545836972225": false}, "0.8072079279572177": {"0.8083036096636488": true, "1.489025245752687": false, "1.688949493364202": false, "3.0515786960742908": false, "3.053056474424691": false}, "0.8083036096636488": {"1.1476826151544048": false, "1.6747920077805454": false, "2.117095042646968": true, "2.177428392257466": true, "2.3703241262220045": false, "3.036348670585614": false, "3.5929484664661198": false, "4.706811303158679": false}, "2.117095042646968": {"3.2783539040267176": true, "3.576971637172915": true, "4.103936774892654": false, "4.138934754323617": false, "4.442190056783633": false}, "3.2783539040267176": {"3.567694636810174": false, "4.021070139114411": false}, "3.576971637172915": {}, "2.177428392257466": {"2.2563865457084535": false, "2.5395138616750006": true, "2.8618801729804586": false}, "2.5395138616750006": {"2.8491400771911453": true, "4.158487664300259": true, "4.5923126054172165": false}, "2.8491400771911453": {"3.2435989817729287": false, "3.2573337503387174": false, "3.610654155440974": false, "4.688300977706366": true, "4.829175010449133": false}, "4.688300977706366": {"4.957327103164111": true}, "4.957327103164111": {}, "4.158487664300259": {"4.50763294512385": false, "4.774870029158423": true}, "4.774870029158423": {}, "1.0021931466850718": {"2.492046262395359": false, "3.4716351315431693": false, "4.29699746428578": false}, "1.1059777208710153": {"3.548105315019394": false, "3.6059101012223125": false, "3.7728195297940323": false, "4.881077149240405": false}, "3.460027174762763": {"4.578399834661159": false, "4.622066521779834": false, "4.681338671145914": false, "4.805759284172403": false}, "1.5692350069948657": {"2.677391755199446": false, "4.318714079233654": false}, "1.8039781042536593": {"2.368138499024213": true, "3.5328123356929675": false}, "2.368138499024213": {"2.4439498578978003": true, "2.8707689926368425": false, "3.0553596367453757": true, "3.579207733296172": false}, "2.4439498578978003": {"2.853933198949305": true, "3.522023920285092": false}, "2.853933198949305": {"3.8912299209096823": false, "4.049341709219163": false, "4.969750888219265": false}, "3.0553596367453757": {"3.2197178301776654": true, "3.587308860929409": true, "3.890412098877804": false, "4.411134441601339": false, "4.507328086745075": false, "4.605153639252816": false}, "3.2197178301776654": {"3.8328173336065685": false, "4.3815248859995455": false}, "3.587308860929409": {"4.452317024354366": false}, "2.248209298294838": {"2.8674629212075056": true, "3.8689948923724957": false, "4.11562787796857": false, "4.164916473588119": false, "4.173537356469909": false, "4.215047557429487": false, "4.500527584436251": false}, "2.8674629212075056": {"3.5209127298982548": true}, "3.5209127298982548": {"4.395263126807089": false}, "3.6613685875205926": {"4.136221404276677": true, "4.820040311128146": false}, "4.136221404276677": {"4.269727354097138": true}, "4.269727354097138": {}, "4.017926338388645": {"4.939951875899513": false}, "4.678580808747876": {}}, {"1": {"0.15438531024406338": false, "0.6012080300557974": true, "1.5692350069948657": true, "1.8039781042536593": true, "1.8601032113401863": false, "2.248209298294838": true, "3.6613685875205926": true, "4.017926338388645": true, "4.678580808747876": true}, "0.6012080300557974": {"0.8072079279572177": true, "1.0021931466850718": true, "1.1059777208710153": true, "3.3208500221945068": false, "3.460027174762763": true, "3.612596681020749": false, "4.620545836972225": false}, "0.8072079279572177": {"0.8083036096636488": true, "1.489025245752687": false, "1.688949493364202": false, "3.0515786960742908": false, "3.053056474424691": false}, "0.8083036096636488": {"1.1476826151544048": false, "1.6747920077805454": false, "2.117095042646968": true, "2.177428392257466": true, "2.3703241262220045": false, "3.036348670585614": false, "3.5929484664661198": false, "4.706811303158679": false}, "2.117095042646968": {"3.2783539040267176": true, "3.576971637172915": true, "4.103936774892654": false, "4.138934754323617": false, "4.442190056783633": false}, "3.2783539040267176": {"3.567694636810174": false, "4.021070139114411": false}, "3.576971637172915": {}, "2.177428392257466": {"2.2563865457084535": false, "2.5395138616750006": true, "2.8618801729804586": false}, "2.5395138616750006": {"2.8491400771911453": true, "4.158487664300259": true, "4.5923126054172165": false}, "2.8491400771911453": {"3.2435989817729287": false, "3.2573337503387174": false, "3.610654155440974": false, "4.688300977706366": true, "4.829175010449133": false}, "4.688300977706366": {"4.957327103164111": true}, "4.957327103164111": {}, "4.158487664300259": {"4.50763294512385": false, "4.774870029158423": true}, "4.774870029158423": {}, "1.0021931466850718": {"2.492046262395359": false, "3.4716351315431693": false, "4.29699746428578": false}, "1.1059777208710153": {"3.548105315019394": false, "3.6059101012223125": false, "3.7728195297940323": false, "4.881077149240405": false}, "3.460027174762763": {"4.578399834661159": false, "4.622066521779834": false, "4.681338671145914": false, "4.805759284172403": false}, "1.5692350069948657": {"2.677391755199446": false, "4.318714079233654": false}, "1.8039781042536593": {"2.368138499024213": true, "3.5328123356929675": false}, "2.368138499024213": {"2.4439498578978003": true, "2.8707689926368425": false, "3.0553596367453757": true, "3.579207733296172": false}, "2.4439498578978003": {"2.853933198949305": true, "3.522023920285092": false}, "2.853933198949305": {"3.8912299209096823": false, "4.049341709219163": false, "4.969750888219265": false}, "3.0553596367453757": {"3.2197178301776654": true, "3.587308860929409": true, "3.890412098877804": false, "4.411134441601339": false, "4.507328086745075": false, "4.605153639252816": false}, "3.2197178301776654": {"3.8328173336065685": false, "4.3815248859995455": false}, "3.587308860929409": {"4.452317024354366": false}, "2.248209298294838": {"2.8674629212075056": true, "3.8689948923724957": false, "4.11562787796857": false, "4.164916473588119": false, "4.173537356469909": false, "4.215047557429487": false, "4.500527584436251": false}, "2.8674629212075056": {"3.5209127298982548": true}, "3.5209127298982548": {"4.395263126807089": false}, "3.6613685875205926": {"4.136221404276677": true, "4.820040311128146": false}, "4.136221404276677": {"4.269727354097138": true}, "4.269727354097138": {}, "4.017926338388645": {"4.939951875899513": false}, "4.678580808747876": {}}, {"1": {"0.15438531024406338": false, "0.6012080300557974": true, "1.5692350069948657": true, "1.8039781042536593": true, "1.8601032113401863": false, "2.248209298294838": true, "3.6613685875205926": true, "4.017926338388645": true, "4.678580808747876": true}, "0.6012080300557974": {"0.8072079279572177": true, "1.0021931466850718": true, "1.1059777208710153": true, "3.3208500221945068": false, "3.460027174762763": true, "3.612596681020749": false, "4.620545836972225": false}, "0.8072079279572177": {"0.8083036096636488": true, "1.489025245752687": false, "1.688949493364202": false, "3.0515786960742908": false, "3.053056474424691": false}, "0.8083036096636488": {"1.1476826151544048": false, "1.6747920077805454": false, "2.117095042646968": true, "2.177428392257466": true, "2.3703241262220045": false, "3.036348670585614": false, "3.5929484664661198": false, "4.706811303158679": false}, "2.117095042646968": {"3.2783539040267176": true, "3.576971637172915": true, "4.103936774892654": false, "4.138934754323617": false, "4.442190056783633": false}, "3.2783539040267176": {"3.567694636810174": false, "4.021070139114411": false}, "3.576971637172915": {}, "2.177428392257466": {"2.2563865457084535": false, "2.5395138616750006": true, "2.8618801729804586": false}, "2.5395138616750006": {"2.8491400771911453": true, "4.158487664300259": true, "4.5923126054172165": false}, "2.8491400771911453": {"3.2435989817729287": false, "3.2573337503387174": false, "3.610654155440974": false, "4.688300977706366": true, "4.829175010449133": false}, "4.688300977706366": {"4.957327103164111": true}, "4.957327103164111": {}, "4.158487664300259": {"4.50763294512385": false, "4.774870029158423": true}, "4.774870029158423": {}, "1.0021931466850718": {"2.492046262395359": false, "3.4716351315431693": false, "4.29699746428578": false}, "1.1059777208710153": {"3.548105315019394": false, "3.6059101012223125": false, "3.7728195297940323": false, "4.881077149240405": false}, "3.460027174762763": {"4.578399834661159": false, "4.622066521779834": false, "4.681338671145914": false, "4.805759284172403": false}, "1.5692350069948657": {"2.677391755199446": false, "4.318714079233654": false}, "1.8039781042536593": {"2.368138499024213": true, "3.5328123356929675": false}, "2.368138499024213": {"2.4439498578978003": true, "2.8707689926368425": false, "3.0553596367453757": true, "3.579207733296172": false}, "2.4439498578978003": {"2.853933198949305": true, "3.522023920285092": false}, "2.853933198949305": {"3.8912299209096823": false, "4.049341709219163": false, "4.969750888219265": false}, "3.0553596367453757": {"3.2197178301776654": true, "3.587308860929409": true, "3.890412098877804": false, "4.411134441601339": false, "4.507328086745075": false, "4.605153639252816": false}, "3.2197178301776654": {"3.8328173336065685": false, "4.3815248859995455": false}, "3.587308860929409": {"4.452317024354366": false}, "2.248209298294838": {"2.8674629212075056": true, "3.8689948923724957": false, "4.11562787796857": false, "4.164916473588119": false, "4.173537356469909": false, "4.215047557429487": false, "4.500527584436251": false}, "2.8674629212075056": {"3.5209127298982548": true}, "3.5209127298982548": {"4.395263126807089": false}, "3.6613685875205926": {"4.136221404276677": true, "4.820040311128146": false}, "4.136221404276677": {"4.269727354097138": true}, "4.269727354097138": {}, "4.017926338388645": {"4.939951875899513": false}, "4.678580808747876": {}}, {"1": {"0.15438531024406338": false, "0.6012080300557974": true, "1.5692350069948657": true, "1.8039781042536593": true, "1.8601032113401863": false, "2.248209298294838": true, "3.6613685875205926": true, "4.017926338388645": true, "4.678580808747876": true}, "0.6012080300557974": {"0.8072079279572177": true, "1.0021931466850718": true, "1.1059777208710153": true, "3.3208500221945068": false, "3.460027174762763": true, "3.612596681020749": false, "4.620545836972225": false}, "0.8072079279572177": {"0.8083036096636488": true, "1.489025245752687": false, "1.688949493364202": false, "3.0515786960742908": false, "3.053056474424691": false}, "0.8083036096636488": {"1.1476826151544048": false, "1.6747920077805454": false, "2.117095042646968": true, "2.177428392257466": true, "2.3703241262220045": false, "3.036348670585614": false, "3.5929484664661198": false, "4.706811303158679": false}, "2.117095042646968": {"3.2783539040267176": true, "3.576971637172915": true, "4.103936774892654": false, "4.138934754323617": false, "4.442190056783633": false}, "3.2783539040267176": {"3.567694636810174": false, "4.021070139114411": false}, "3.576971637172915": {}, "2.177428392257466": {"2.2563865457084535": false, "2.5395138616750006": true, "2.8618801729804586": false}, "2.5395138616750006": {"2.8491400771911453": true, "4.158487664300259": true, "4.5923126054172165": false}, "2.8491400771911453": {"3.2435989817729287": false, "3.2573337503387174": false, "3.610654155440974": false, "4.688300977706366": true, "4.829175010449133": false}, "4.688300977706366": {"4.957327103164111": true}, "4.957327103164111": {}, "4.158487664300259": {"4.50763294512385": false, "4.774870029158423": true}, "4.774870029158423": {}, "1.0021931466850718": {"2.492046262395359": false, "3.4716351315431693": false, "4.29699746428578": false}, "1.1059777208710153": {"3.548105315019394": false, "3.6059101012223125": false, "3.7728195297940323": false, "4.881077149240405": false}, "3.460027174762763": {"4.578399834661159": false, "4.622066521779834": false, "4.681338671145914": false, "4.805759284172403": false}, "1.5692350069948657": {"2.677391755199446": false, "4.318714079233654": false}, "1.8039781042536593": {"2.368138499024213": true, "3.5328123356929675": false}, "2.368138499024213": {"2.4439498578978003": true, "2.8707689926368425": false, "3.0553596367453757": true, "3.579207733296172": false}, "2.4439498578978003": {"2.853933198949305": true, "3.522023920285092": false}, "2.853933198949305": {"3.8912299209096823": false, "4.049341709219163": false, "4.969750888219265": false}, "3.0553596367453757": {"3.2197178301776654": true, "3.587308860929409": true, "3.890412098877804": false, "4.411134441601339": false, "4.507328086745075": false, "4.605153639252816": false}, "3.2197178301776654": {"3.8328173336065685": false, "4.3815248859995455": false}, "3.587308860929409": {"4.452317024354366": false}, "2.248209298294838": {"2.8674629212075056": true, "3.8689948923724957": false, "4.11562787796857": false, "4.164916473588119": false, "4.173537356469909": false, "4.215047557429487": false, "4.500527584436251": false}, "2.8674629212075056": {"3.5209127298982548": true}, "3.5209127298982548": {"4.395263126807089": false}, "3.6613685875205926": {"4.136221404276677": true, "4.820040311128146": false}, "4.136221404276677": {"4.269727354097138": true}, "4.269727354097138": {}, "4.017926338388645": {"4.939951875899513": false}, "4.678580808747876": {}}, {"1": {"0.15438531024406338": false, "0.6012080300557974": true, "1.5692350069948657": true, "1.8039781042536593": true, "1.8601032113401863": false, "2.248209298294838": true, "3.6613685875205926": true, "4.017926338388645": true, "4.678580808747876": true}, "0.6012080300557974": {"0.8072079279572177": true, "1.0021931466850718": true, "1.1059777208710153": true, "3.3208500221945068": false, "3.460027174762763": true, "3.612596681020749": false, "4.620545836972225": false}, "0.8072079279572177": {"0.8083036096636488": true, "1.489025245752687": false, "1.688949493364202": false, "3.0515786960742908": false, "3.053056474424691": false}, "0.8083036096636488": {"1.1476826151544048": false, "1.6747920077805454": false, "2.117095042646968": true, "2.177428392257466": true, "2.3703241262220045": false, "3.036348670585614": false, "3.5929484664661198": false, "4.706811303158679": false}, "2.117095042646968": {"3.2783539040267176": true, "3.576971637172915": true, "4.103936774892654": false, "4.138934754323617": false, "4.442190056783633": false}, "3.2783539040267176": {"3.567694636810174": false, "4.021070139114411": false}, "3.576971637172915": {}, "2.177428392257466": {"2.2563865457084535": false, "2.5395138616750006": true, "2.8618801729804586": false}, "2.5395138616750006": {"2.8491400771911453": true, "4.158487664300259": true, "4.5923126054172165": false}, "2.8491400771911453": {"3.2435989817729287": false, "3.2573337503387174": false, "3.610654155440974": false, "4.688300977706366": true, "4.829175010449133": false}, "4.688300977706366": {"4.957327103164111": true}, "4.957327103164111": {}, "4.158487664300259": {"4.50763294512385": false, "4.774870029158423": true}, "4.774870029158423": {}, "1.0021931466850718": {"2.492046262395359": false, "3.4716351315431693": false, "4.29699746428578": false}, "1.1059777208710153": {"3.548105315019394": false, "3.6059101012223125": false, "3.7728195297940323": false, "4.881077149240405": false}, "3.460027174762763": {"4.578399834661159": false, "4.622066521779834": false, "4.681338671145914": false, "4.805759284172403": false}, "1.5692350069948657": {"2.677391755199446": false, "4.318714079233654": false}, "1.8039781042536593": {"2.368138499024213": true, "3.5328123356929675": false}, "2.368138499024213": {"2.4439498578978003": true, "2.8707689926368425": false, "3.0553596367453757": true, "3.579207733296172": false}, "2.4439498578978003": {"2.853933198949305": true, "3.522023920285092": false}, "2.853933198949305": {"3.8912299209096823": false, "4.049341709219163": false, "4.969750888219265": false}, "3.0553596367453757": {"3.2197178301776654": true, "3.587308860929409": true, "3.890412098877804": false, "4.411134441601339": false, "4.507328086745075": false, "4.605153639252816": false}, "3.2197178301776654": {"3.8328173336065685": false, "4.3815248859995455": false}, "3.587308860929409": {"4.452317024354366": false}, "2.248209298294838": {"2.8674629212075056": true, "3.8689948923724957": false, "4.11562787796857": false, "4.164916473588119": false, "4.173537356469909": false, "4.215047557429487": false, "4.500527584436251": false}, "2.8674629212075056": {"3.5209127298982548": true}, "3.5209127298982548": {"4.395263126807089": false}, "3.6613685875205926": {"4.136221404276677": true, "4.820040311128146": false}, "4.136221404276677": {"4.269727354097138": true}, "4.269727354097138": {}, "4.017926338388645": {"4.939951875899513": false}, "4.678580808747876": {}}, {"1": {"0.15438531024406338": false, "0.6012080300557974": true, "1.5692350069948657": true, "1.8039781042536593": true, "1.8601032113401863": false, "2.248209298294838": true, "3.6613685875205926": true, "4.017926338388645": true, "4.678580808747876": true}, "0.6012080300557974": {"0.8072079279572177": true, "1.0021931466850718": true, "1.1059777208710153": true, "3.3208500221945068": false, "3.460027174762763": true, "3.612596681020749": false, "4.620545836972225": false}, "0.8072079279572177": {"0.8083036096636488": true, "1.489025245752687": false, "1.688949493364202": false, "3.0515786960742908": false, "3.053056474424691": false}, "0.8083036096636488": {"1.1476826151544048": false, "1.6747920077805454": false, "2.117095042646968": true, "2.177428392257466": true, "2.3703241262220045": false, "3.036348670585614": false, "3.5929484664661198": false, "4.706811303158679": false}, "2.117095042646968": {"3.2783539040267176": true, "3.576971637172915": true, "4.103936774892654": false, "4.138934754323617": false, "4.442190056783633": false}, "3.2783539040267176": {"3.567694636810174": false, "4.021070139114411": false}, "3.576971637172915": {}, "2.177428392257466": {"2.2563865457084535": false, "2.5395138616750006": true, "2.8618801729804586": false}, "2.5395138616750006": {"2.8491400771911453": true, "4.158487664300259": true, "4.5923126054172165": false}, "2.8491400771911453": {"3.2435989817729287": false, "3.2573337503387174": false, "3.610654155440974": false, "4.688300977706366": true, "4.829175010449133": false}, "4.688300977706366": {"4.957327103164111": true}, "4.957327103164111": {}, "4.158487664300259": {"4.50763294512385": false, "4.774870029158423": true}, "4.774870029158423": {}, "1.0021931466850718": {"2.492046262395359": false, "3.4716351315431693": false, "4.29699746428578": false}, "1.1059777208710153": {"3.548105315019394": false, "3.6059101012223125": false, "3.7728195297940323": false, "4.881077149240405": false}, "3.460027174762763": {"4.578399834661159": false, "4.622066521779834": false, "4.681338671145914": false, "4.805759284172403": false}, "1.5692350069948657": {"2.677391755199446": false, "4.318714079233654": false}, "1.8039781042536593": {"2.368138499024213": true, "3.5328123356929675": false}, "2.368138499024213": {"2.4439498578978003": true, "2.8707689926368425": false, "3.0553596367453757": true, "3.579207733296172": false}, "2.4439498578978003": {"2.853933198949305": true, "3.522023920285092": false}, "2.853933198949305": {"3.8912299209096823": false, "4.049341709219163": false, "4.969750888219265": false}, "3.0553596367453757": {"3.2197178301776654": true, "3.587308860929409": true, "3.890412098877804": false, "4.411134441601339": false, "4.507328086745075": false, "4.605153639252816": false}, "3.2197178301776654": {"3.8328173336065685": false, "4.3815248859995455": false}, "3.587308860929409": {"4.452317024354366": false}, "2.248209298294838": {"2.8674629212075056": true, "3.8689948923724957": false, "4.11562787796857": false, "4.164916473588119": false, "4.173537356469909": false, "4.215047557429487": false, "4.500527584436251": false}, "2.8674629212075056": {"3.5209127298982548": true}, "3.5209127298982548": {"4.395263126807089": false}, "3.6613685875205926": {"4.136221404276677": true, "4.820040311128146": false}, "4.136221404276677": {"4.269727354097138": true}, "4.269727354097138": {}, "4.017926338388645": {"4.939951875899513": false}, "4.678580808747876": {}}, {"1": {"0.15438531024406338": false, "0.6012080300557974": true, "1.5692350069948657": true, "1.8039781042536593": true, "1.8601032113401863": false, "2.248209298294838": true, "3.6613685875205926": true, "4.017926338388645": true, "4.678580808747876": true}, "0.6012080300557974": {"0.8072079279572177": true, "1.0021931466850718": true, "1.1059777208710153": true, "3.3208500221945068": false, "3.460027174762763": true, "3.612596681020749": false, "4.620545836972225": false}, "0.8072079279572177": {"0.8083036096636488": true, "1.489025245752687": false, "1.688949493364202": false, "3.0515786960742908": false, "3.053056474424691": false}, "0.8083036096636488": {"1.1476826151544048": false, "1.6747920077805454": false, "2.117095042646968": true, "2.177428392257466": true, "2.3703241262220045": false, "3.036348670585614": false, "3.5929484664661198": false, "4.706811303158679": false}, "2.117095042646968": {"3.2783539040267176": true, "3.576971637172915": true, "4.103936774892654": false, "4.138934754323617": false, "4.442190056783633": false}, "3.2783539040267176": {"3.567694636810174": false, "4.021070139114411": false}, "3.576971637172915": {}, "2.177428392257466": {"2.2563865457084535": false, "2.5395138616750006": true, "2.8618801729804586": false}, "2.5395138616750006": {"2.8491400771911453": true, "4.158487664300259": true, "4.5923126054172165": false}, "2.8491400771911453": {"3.2435989817729287": false, "3.2573337503387174": false, "3.610654155440974": false, "4.688300977706366": true, "4.829175010449133": false}, "4.688300977706366": {"4.957327103164111": true}, "4.957327103164111": {}, "4.158487664300259": {"4.50763294512385": false, "4.774870029158423": true}, "4.774870029158423": {}, "1.0021931466850718": {"2.492046262395359": false, "3.4716351315431693": false, "4.29699746428578": false}, "1.1059777208710153": {"3.548105315019394": false, "3.6059101012223125": false, "3.7728195297940323": false, "4.881077149240405": false}, "3.460027174762763": {"4.578399834661159": false, "4.622066521779834": false, "4.681338671145914": false, "4.805759284172403": false}, "1.5692350069948657": {"2.677391755199446": false, "4.318714079233654": false}, "1.8039781042536593": {"2.368138499024213": true, "3.5328123356929675": false}, "2.368138499024213": {"2.4439498578978003": true, "2.8707689926368425": false, "3.0553596367453757": true, "3.579207733296172": false}, "2.4439498578978003": {"2.853933198949305": true, "3.522023920285092": false}, "2.853933198949305": {"3.8912299209096823": false, "4.049341709219163": false, "4.969750888219265": false}, "3.0553596367453757": {"3.2197178301776654": true, "3.587308860929409": true, "3.890412098877804": false, "4.411134441601339": false, "4.507328086745075": false, "4.605153639252816": false}, "3.2197178301776654": {"3.8328173336065685": false, "4.3815248859995455": false}, "3.587308860929409": {"4.452317024354366": false}, "2.248209298294838": {"2.8674629212075056": true, "3.8689948923724957": false, "4.11562787796857": false, "4.164916473588119": false, "4.173537356469909": false, "4.215047557429487": false, "4.500527584436251": false}, "2.8674629212075056": {"3.5209127298982548": true}, "3.5209127298982548": {"4.395263126807089": false}, "3.6613685875205926": {"4.136221404276677": true, "4.820040311128146": false}, "4.136221404276677": {"4.269727354097138": true}, "4.269727354097138": {}, "4.017926338388645": {"4.939951875899513": false}, "4.678580808747876": {}}, {"1": {"0.15438531024406338": false, "0.6012080300557974": true, "1.5692350069948657": true, "1.8039781042536593": true, "1.8601032113401863": false, "2.248209298294838": true, "3.6613685875205926": true, "4.017926338388645": true, "4.678580808747876": true}, "0.6012080300557974": {"0.8072079279572177": true, "1.0021931466850718": true, "1.1059777208710153": true, "3.3208500221945068": false, "3.460027174762763": true, "3.612596681020749": false, "4.620545836972225": false}, "0.8072079279572177": {"0.8083036096636488": true, "1.489025245752687": false, "1.688949493364202": false, "3.0515786960742908": false, "3.053056474424691": false}, "0.8083036096636488": {"1.1476826151544048": false, "1.6747920077805454": false, "2.117095042646968": true, "2.177428392257466": true, "2.3703241262220045": false, "3.036348670585614": false, "3.5929484664661198": false, "4.706811303158679": false}, "2.117095042646968": {"3.2783539040267176": true, "3.576971637172915": true, "4.103936774892654": false, "4.138934754323617": false, "4.442190056783633": false}, "3.2783539040267176": {"3.567694636810174": false, "4.021070139114411": false}, "3.576971637172915": {}, "2.177428392257466": {"2.2563865457084535": false, "2.5395138616750006": true, "2.8618801729804586": false}, "2.5395138616750006": {"2.8491400771911453": true, "4.158487664300259": true, "4.5923126054172165": false}, "2.8491400771911453": {"3.2435989817729287": false, "3.2573337503387174": false, "3.610654155440974": false, "4.688300977706366": true, "4.829175010449133": false}, "4.688300977706366": {"4.957327103164111": true}, "4.957327103164111": {}, "4.158487664300259": {"4.50763294512385": false, "4.774870029158423": true}, "4.774870029158423": {}, "1.0021931466850718": {"2.492046262395359": false, "3.4716351315431693": false, "4.29699746428578": false}, "1.1059777208710153": {"3.548105315019394": false, "3.6059101012223125": false, "3.7728195297940323": false, "4.881077149240405": false}, "3.460027174762763": {"4.578399834661159": false, "4.622066521779834": false, "4.681338671145914": false, "4.805759284172403": false}, "1.5692350069948657": {"2.677391755199446": false, "4.318714079233654": false}, "1.8039781042536593": {"2.368138499024213": true, "3.5328123356929675": false}, "2.368138499024213": {"2.4439498578978003": true, "2.8707689926368425": false, "3.0553596367453757": true, "3.579207733296172": false}, "2.4439498578978003": {"2.853933198949305": true, "3.522023920285092": false}, "2.853933198949305": {"3.8912299209096823": false, "4.049341709219163": false, "4.969750888219265": false}, "3.0553596367453757": {"3.2197178301776654": true, "3.587308860929409": true, "3.890412098877804": false, "4.411134441601339": false, "4.507328086745075": false, "4.605153639252816": false}, "3.2197178301776654": {"3.8328173336065685": false, "4.3815248859995455": false}, "3.587308860929409": {"4.452317024354366": false}, "2.248209298294838": {"2.8674629212075056": true, "3.8689948923724957": false, "4.11562787796857": false, "4.164916473588119": false, "4.173537356469909": false, "4.215047557429487": false, "4.500527584436251": false}, "2.8674629212075056": {"3.5209127298982548": true}, "3.5209127298982548": {"4.395263126807089": false}, "3.6613685875205926": {"4.136221404276677": true, "4.820040311128146": false}, "4.136221404276677": {"4.269727354097138": true}, "4.269727354097138": {}, "4.017926338388645": {"4.939951875899513": false}, "4.678580808747876": {}}, {"1": {"0.15438531024406338": false, "0.6012080300557974": true, "1.5692350069948657": true, "1.8039781042536593": true, "1.8601032113401863": false, "2.248209298294838": true, "3.6613685875205926": true, "4.017926338388645": true, "4.678580808747876": true}, "0.6012080300557974": {"0.8072079279572177": true, "1.0021931466850718": true, "1.1059777208710153": true, "3.3208500221945068": false, "3.460027174762763": true, "3.612596681020749": false, "4.620545836972225": false}, "0.8072079279572177": {"0.8083036096636488": true, "1.489025245752687": false, "1.688949493364202": false, "3.0515786960742908": false, "3.053056474424691": false}, "0.8083036096636488": {"1.1476826151544048": false, "1.6747920077805454": false, "2.117095042646968": true, "2.177428392257466": true, "2.3703241262220045": false, "3.036348670585614": false, "3.5929484664661198": false, "4.706811303158679": false}, "2.117095042646968": {"3.2783539040267176": true, "3.576971637172915": true, "4.103936774892654": false, "4.138934754323617": false, "4.442190056783633": false}, "3.2783539040267176": {"3.567694636810174": false, "4.021070139114411": false}, "3.576971637172915": {}, "2.177428392257466": {"2.2563865457084535": false, "2.5395138616750006": true, "2.8618801729804586": false}, "2.5395138616750006": {"2.8491400771911453": true, "4.158487664300259": true, "4.5923126054172165": false}, "2.8491400771911453": {"3.2435989817729287": false, "3.2573337503387174": false, "3.610654155440974": false, "4.688300977706366": true, "4.829175010449133": false}, "4.688300977706366": {"4.957327103164111": true}, "4.957327103164111": {}, "4.158487664300259": {"4.50763294512385": false, "4.774870029158423": true}, "4.774870029158423": {}, "1.0021931466850718": {"2.492046262395359": false, "3.4716351315431693": false, "4.29699746428578": false}, "1.1059777208710153": {"3.548105315019394": false, "3.6059101012223125": false, "3.7728195297940323": false, "4.881077149240405": false}, "3.460027174762763": {"4.578399834661159": false, "4.622066521779834": false, "4.681338671145914": false, "4.805759284172403": false}, "1.5692350069948657": {"2.677391755199446": false, "4.318714079233654": false}, "1.8039781042536593": {"2.368138499024213": true, "3.5328123356929675": false}, "2.368138499024213": {"2.4439498578978003": true, "2.8707689926368425": false, "3.0553596367453757": true, "3.579207733296172": false}, "2.4439498578978003": {"2.853933198949305": true, "3.522023920285092": false}, "2.853933198949305": {"3.8912299209096823": false, "4.049341709219163": false, "4.969750888219265": false}, "3.0553596367453757": {"3.2197178301776654": true, "3.587308860929409": true, "3.890412098877804": false, "4.411134441601339": false, "4.507328086745075": false, "4.605153639252816": false}, "3.2197178301776654": {"3.8328173336065685": false, "4.3815248859995455": false}, "3.587308860929409": {"4.452317024354366": false}, "2.248209298294838": {"2.8674629212075056": true, "3.8689948923724957": false, "4.11562787796857": false, "4.164916473588119": false, "4.173537356469909": false, "4.215047557429487": false, "4.500527584436251": false}, "2.8674629212075056": {"3.5209127298982548": true}, "3.5209127298982548": {"4.395263126807089": false}, "3.6613685875205926": {"4.136221404276677": true, "4.820040311128146": false}, "4.136221404276677": {"4.269727354097138": true}, "4.269727354097138": {}, "4.017926338388645": {"4.939951875899513": false}, "4.678580808747876": {}}, {"1": {"0.15438531024406338": false, "0.6012080300557974": true, "1.5692350069948657": true, "1.8039781042536593": true, "1.8601032113401863": false, "2.248209298294838": true, "3.6613685875205926": true, "4.017926338388645": true, "4.678580808747876": true}, "0.6012080300557974": {"0.8072079279572177": true, "1.0021931466850718": true, "1.1059777208710153": true, "3.3208500221945068": false, "3.460027174762763": true, "3.612596681020749": false, "4.620545836972225": false}, "0.8072079279572177": {"0.8083036096636488": true, "1.489025245752687": false, "1.688949493364202": false, "3.0515786960742908": false, "3.053056474424691": false}, "0.8083036096636488": {"1.1476826151544048": false, "1.6747920077805454": false, "2.117095042646968": true, "2.177428392257466": true, "2.3703241262220045": false, "3.036348670585614": false, "3.5929484664661198": false, "4.706811303158679": false}, "2.117095042646968": {"3.2783539040267176": true, "3.576971637172915": true, "4.103936774892654": false, "4.138934754323617": false, "4.442190056783633": false}, "3.2783539040267176": {"3.567694636810174": false, "4.021070139114411": false}, "3.576971637172915": {}, "2.177428392257466": {"2.2563865457084535": false, "2.5395138616750006": true, "2.8618801729804586": false}, "2.5395138616750006": {"2.8491400771911453": true, "4.158487664300259": true, "4.5923126054172165": false}, "2.8491400771911453": {"3.2435989817729287": false, "3.2573337503387174": false, "3.610654155440974": false, "4.688300977706366": true, "4.829175010449133": false}, "4.688300977706366": {"4.957327103164111": true}, "4.957327103164111": {}, "4.158487664300259": {"4.50763294512385": false, "4.774870029158423": true}, "4.774870029158423": {}, "1.0021931466850718": {"2.492046262395359": false, "3.4716351315431693": false, "4.29699746428578": false}, "1.1059777208710153": {"3.548105315019394": false, "3.6059101012223125": false, "3.7728195297940323": false, "4.881077149240405": false}, "3.460027174762763": {"4.578399834661159": false, "4.622066521779834": false, "4.681338671145914": false, "4.805759284172403": false}, "1.5692350069948657": {"2.677391755199446": false, "4.318714079233654": false}, "1.8039781042536593": {"2.368138499024213": true, "3.5328123356929675": false}, "2.368138499024213": {"2.4439498578978003": true, "2.8707689926368425": false, "3.0553596367453757": true, "3.579207733296172": false}, "2.4439498578978003": {"2.853933198949305": true, "3.522023920285092": false}, "2.853933198949305": {"3.8912299209096823": false, "4.049341709219163": false, "4.969750888219265": false}, "3.0553596367453757": {"3.2197178301776654": true, "3.587308860929409": true, "3.890412098877804": false, "4.411134441601339": false, "4.507328086745075": false, "4.605153639252816": false}, "3.2197178301776654": {"3.8328173336065685": false, "4.3815248859995455": false}, "3.587308860929409": {"4.452317024354366": false}, "2.248209298294838": {"2.8674629212075056": true, "3.8689948923724957": false, "4.11562787796857": false, "4.164916473588119": false, "4.173537356469909": false, "4.215047557429487": false, "4.500527584436251": false}, "2.8674629212075056": {"3.5209127298982548": true}, "3.5209127298982548": {"4.395263126807089": false}, "3.6613685875205926": {"4.136221404276677": true, "4.820040311128146": false}, "4.136221404276677": {"4.269727354097138": true}, "4.269727354097138": {}, "4.017926338388645": {"4.939951875899513": false}, "4.678580808747876": {}}, {"1": {"0.15438531024406338": false, "0.6012080300557974": true, "1.5692350069948657": true, "1.8039781042536593": true, "1.8601032113401863": false, "2.248209298294838": true, "3.6613685875205926": true, "4.017926338388645": true, "4.678580808747876": true}, "0.6012080300557974": {"0.8072079279572177": true, "1.0021931466850718": true, "1.1059777208710153": true, "3.3208500221945068": false, "3.460027174762763": true, "3.612596681020749": false, "4.620545836972225": false}, "0.8072079279572177": {"0.8083036096636488": true, "1.489025245752687": false, "1.688949493364202": false, "3.0515786960742908": false, "3.053056474424691": false}, "0.8083036096636488": {"1.1476826151544048": false, "1.6747920077805454": false, "2.117095042646968": true, "2.177428392257466": true, "2.3703241262220045": false, "3.036348670585614": false, "3.5929484664661198": false, "4.706811303158679": false}, "2.117095042646968": {"3.2783539040267176": true, "3.576971637172915": true, "4.103936774892654": false, "4.138934754323617": false, "4.442190056783633": false}, "3.2783539040267176": {"3.567694636810174": false, "4.021070139114411": false}, "3.576971637172915": {}, "2.177428392257466": {"2.2563865457084535": false, "2.5395138616750006": true, "2.8618801729804586": false}, "2.5395138616750006": {"2.8491400771911453": true, "4.158487664300259": true, "4.5923126054172165": false}, "2.8491400771911453": {"3.2435989817729287": false, "3.2573337503387174": false, "3.610654155440974": false, "4.688300977706366": true, "4.829175010449133": false}, "4.688300977706366": {"4.957327103164111": true}, "4.957327103164111": {}, "4.158487664300259": {"4.50763294512385": false, "4.774870029158423": true}, "4.774870029158423": {}, "1.0021931466850718": {"2.492046262395359": false, "3.4716351315431693": false, "4.29699746428578": false}, "1.1059777208710153": {"3.548105315019394": false, "3.6059101012223125": false, "3.7728195297940323": false, "4.881077149240405": false}, "3.460027174762763": {"4.578399834661159": false, "4.622066521779834": false, "4.681338671145914": false, "4.805759284172403": false}, "1.5692350069948657": {"2.677391755199446": false, "4.318714079233654": false}, "1.8039781042536593": {"2.368138499024213": true, "3.5328123356929675": false}, "2.368138499024213": {"2.4439498578978003": true, "2.8707689926368425": false, "3.0553596367453757": true, "3.579207733296172": false}, "2.4439498578978003": {"2.853933198949305": true, "3.522023920285092": false}, "2.853933198949305": {"3.8912299209096823": false, "4.049341709219163": false, "4.969750888219265": false}, "3.0553596367453757": {"3.2197178301776654": true, "3.587308860929409": true, "3.890412098877804": false, "4.411134441601339": false, "4.507328086745075": false, "4.605153639252816": false}, "3.2197178301776654": {"3.8328173336065685": false, "4.3815248859995455": false}, "3.587308860929409": {"4.452317024354366": false}, "2.248209298294838": {"2.8674629212075056": true, "3.8689948923724957": false, "4.11562787796857": false, "4.164916473588119": false, "4.173537356469909": false, "4.215047557429487": false, "4.500527584436251": false}, "2.8674629212075056": {"3.5209127298982548": true}, "3.5209127298982548": {"4.395263126807089": false}, "3.6613685875205926": {"4.136221404276677": true, "4.820040311128146": false}, "4.136221404276677": {"4.269727354097138": true}, "4.269727354097138": {}, "4.017926338388645": {"4.939951875899513": false}, "4.678580808747876": {}}, {"1": {"0.15438531024406338": false, "0.6012080300557974": true, "1.5692350069948657": true, "1.8039781042536593": true, "1.8601032113401863": false, "2.248209298294838": true, "3.6613685875205926": true, "4.017926338388645": true, "4.678580808747876": true}, "0.6012080300557974": {"0.8072079279572177": true, "1.0021931466850718": true, "1.1059777208710153": true, "3.3208500221945068": false, "3.460027174762763": true, "3.612596681020749": false, "4.620545836972225": false}, "0.8072079279572177": {"0.8083036096636488": true, "1.489025245752687": false, "1.688949493364202": false, "3.0515786960742908": false, "3.053056474424691": false}, "0.8083036096636488": {"1.1476826151544048": false, "1.6747920077805454": false, "2.117095042646968": true, "2.177428392257466": true, "2.3703241262220045": false, "3.036348670585614": false, "3.5929484664661198": false, "4.706811303158679": false}, "2.117095042646968": {"3.2783539040267176": true, "3.576971637172915": true, "4.103936774892654": false, "4.138934754323617": false, "4.442190056783633": false}, "3.2783539040267176": {"3.567694636810174": false, "4.021070139114411": false}, "3.576971637172915": {}, "2.177428392257466": {"2.2563865457084535": false, "2.5395138616750006": true, "2.8618801729804586": false}, "2.5395138616750006": {"2.8491400771911453": true, "4.158487664300259": true, "4.5923126054172165": false}, "2.8491400771911453": {"3.2435989817729287": false, "3.2573337503387174": false, "3.610654155440974": false, "4.688300977706366": true, "4.829175010449133": false}, "4.688300977706366": {"4.957327103164111": true}, "4.957327103164111": {}, "4.158487664300259": {"4.50763294512385": false, "4.774870029158423": true}, "4.774870029158423": {}, "1.0021931466850718": {"2.492046262395359": false, "3.4716351315431693": false, "4.29699746428578": false}, "1.1059777208710153": {"3.548105315019394": false, "3.6059101012223125": false, "3.7728195297940323": false, "4.881077149240405": false}, "3.460027174762763": {"4.578399834661159": false, "4.622066521779834": false, "4.681338671145914": false, "4.805759284172403": false}, "1.5692350069948657": {"2.677391755199446": false, "4.318714079233654": false}, "1.8039781042536593": {"2.368138499024213": true, "3.5328123356929675": false}, "2.368138499024213": {"2.4439498578978003": true, "2.8707689926368425": false, "3.0553596367453757": true, "3.579207733296172": false}, "2.4439498578978003": {"2.853933198949305": true, "3.522023920285092": false}, "2.853933198949305": {"3.8912299209096823": false, "4.049341709219163": false, "4.969750888219265": false}, "3.0553596367453757": {"3.2197178301776654": true, "3.587308860929409": true, "3.890412098877804": false, "4.411134441601339": false, "4.507328086745075": false, "4.605153639252816": false}, "3.2197178301776654": {"3.8328173336065685": false, "4.3815248859995455": false}, "3.587308860929409": {"4.452317024354366": false}, "2.248209298294838": {"2.8674629212075056": true, "3.8689948923724957": false, "4.11562787796857": false, "4.164916473588119": false, "4.173537356469909": false, "4.215047557429487": false, "4.500527584436251": false}, "2.8674629212075056": {"3.5209127298982548": true}, "3.5209127298982548": {"4.395263126807089": false}, "3.6613685875205926": {"4.136221404276677": true, "4.820040311128146": false}, "4.136221404276677": {"4.269727354097138": true}, "4.269727354097138": {}, "4.017926338388645": {"4.939951875899513": false}, "4.678580808747876": {}}, {"1": {"0.15438531024406338": false, "0.6012080300557974": true, "1.5692350069948657": true, "1.8039781042536593": true, "1.8601032113401863": false, "2.248209298294838": true, "3.6613685875205926": true, "4.017926338388645": true, "4.678580808747876": true}, "0.6012080300557974": {"0.8072079279572177": true, "1.0021931466850718": true, "1.1059777208710153": true, "3.3208500221945068": false, "3.460027174762763": true, "3.612596681020749": false, "4.620545836972225": false}, "0.8072079279572177": {"0.8083036096636488": true, "1.489025245752687": false, "1.688949493364202": false, "3.0515786960742908": false, "3.053056474424691": false}, "0.8083036096636488": {"1.1476826151544048": false, "1.6747920077805454": false, "2.117095042646968": true, "2.177428392257466": true, "2.3703241262220045": false, "3.036348670585614": false, "3.5929484664661198": false, "4.706811303158679": false}, "2.117095042646968": {"3.2783539040267176": true, "3.576971637172915": true, "4.103936774892654": false, "4.138934754323617": false, "4.442190056783633": false}, "3.2783539040267176": {"3.567694636810174": false, "4.021070139114411": false}, "3.576971637172915": {}, "2.177428392257466": {"2.2563865457084535": false, "2.5395138616750006": true, "2.8618801729804586": false}, "2.5395138616750006": {"2.8491400771911453": true, "4.158487664300259": true, "4.5923126054172165": false}, "2.8491400771911453": {"3.2435989817729287": false, "3.2573337503387174": false, "3.610654155440974": false, "4.688300977706366": true, "4.829175010449133": false}, "4.688300977706366": {"4.957327103164111": true}, "4.957327103164111": {}, "4.158487664300259": {"4.50763294512385": false, "4.774870029158423": true}, "4.774870029158423": {}, "1.0021931466850718": {"2.492046262395359": false, "3.4716351315431693": false, "4.29699746428578": false}, "1.1059777208710153": {"3.548105315019394": false, "3.6059101012223125": false, "3.7728195297940323": false, "4.881077149240405": false}, "3.460027174762763": {"4.578399834661159": false, "4.622066521779834": false, "4.681338671145914": false, "4.805759284172403": false}, "1.5692350069948657": {"2.677391755199446": false, "4.318714079233654": false}, "1.8039781042536593": {"2.368138499024213": true, "3.5328123356929675": false}, "2.368138499024213": {"2.4439498578978003": true, "2.8707689926368425": false, "3.0553596367453757": true, "3.579207733296172": false}, "2.4439498578978003": {"2.853933198949305": true, "3.522023920285092": false}, "2.853933198949305": {"3.8912299209096823": false, "4.049341709219163": false, "4.969750888219265": false}, "3.0553596367453757": {"3.2197178301776654": true, "3.587308860929409": true, "3.890412098877804": false, "4.411134441601339": false, "4.507328086745075": false, "4.605153639252816": false}, "3.2197178301776654": {"3.8328173336065685": false, "4.3815248859995455": false}, "3.587308860929409": {"4.452317024354366": false}, "2.248209298294838": {"2.8674629212075056": true, "3.8689948923724957": false, "4.11562787796857": false, "4.164916473588119": false, "4.173537356469909": false, "4.215047557429487": false, "4.500527584436251": false}, "2.8674629212075056": {"3.5209127298982548": true}, "3.5209127298982548": {"4.395263126807089": false}, "3.6613685875205926": {"4.136221404276677": true, "4.820040311128146": false}, "4.136221404276677": {"4.269727354097138": true}, "4.269727354097138": {}, "4.017926338388645": {"4.939951875899513": false}, "4.678580808747876": {}}, {"1": {"0.15438531024406338": false, "0.6012080300557974": true, "1.5692350069948657": true, "1.8039781042536593": true, "1.8601032113401863": false, "2.248209298294838": true, "3.6613685875205926": true, "4.017926338388645": true, "4.678580808747876": true}, "0.6012080300557974": {"0.8072079279572177": true, "1.0021931466850718": true, "1.1059777208710153": true, "3.3208500221945068": false, "3.460027174762763": true, "3.612596681020749": false, "4.620545836972225": false}, "0.8072079279572177": {"0.8083036096636488": true, "1.489025245752687": false, "1.688949493364202": false, "3.0515786960742908": false, "3.053056474424691": false}, "0.8083036096636488": {"1.1476826151544048": false, "1.6747920077805454": false, "2.117095042646968": true, "2.177428392257466": true, "2.3703241262220045": false, "3.036348670585614": false, "3.5929484664661198": false, "4.706811303158679": false}, "2.117095042646968": {"3.2783539040267176": true, "3.576971637172915": true, "4.103936774892654": false, "4.138934754323617": false, "4.442190056783633": false}, "3.2783539040267176": {"3.567694636810174": false, "4.021070139114411": false}, "3.576971637172915": {}, "2.177428392257466": {"2.2563865457084535": false, "2.5395138616750006": true, "2.8618801729804586": false}, "2.5395138616750006": {"2.8491400771911453": true, "4.158487664300259": true, "4.5923126054172165": false}, "2.8491400771911453": {"3.2435989817729287": false, "3.2573337503387174": false, "3.610654155440974": false, "4.688300977706366": true, "4.829175010449133": false}, "4.688300977706366": {"4.957327103164111": true}, "4.957327103164111": {}, "4.158487664300259": {"4.50763294512385": false, "4.774870029158423": true}, "4.774870029158423": {}, "1.0021931466850718": {"2.492046262395359": false, "3.4716351315431693": false, "4.29699746428578": false}, "1.1059777208710153": {"3.548105315019394": false, "3.6059101012223125": false, "3.7728195297940323": false, "4.881077149240405": false}, "3.460027174762763": {"4.578399834661159": false, "4.622066521779834": false, "4.681338671145914": false, "4.805759284172403": false}, "1.5692350069948657": {"2.677391755199446": false, "4.318714079233654": false}, "1.8039781042536593": {"2.368138499024213": true, "3.5328123356929675": false}, "2.368138499024213": {"2.4439498578978003": true, "2.8707689926368425": false, "3.0553596367453757": true, "3.579207733296172": false}, "2.4439498578978003": {"2.853933198949305": true, "3.522023920285092": false}, "2.853933198949305": {"3.8912299209096823": false, "4.049341709219163": false, "4.969750888219265": false}, "3.0553596367453757": {"3.2197178301776654": true, "3.587308860929409": true, "3.890412098877804": false, "4.411134441601339": false, "4.507328086745075": false, "4.605153639252816": false}, "3.2197178301776654": {"3.8328173336065685": false, "4.3815248859995455": false}, "3.587308860929409": {"4.452317024354366": false}, "2.248209298294838": {"2.8674629212075056": true, "3.8689948923724957": false, "4.11562787796857": false, "4.164916473588119": false, "4.173537356469909": false, "4.215047557429487": false, "4.500527584436251": false}, "2.8674629212075056": {"3.5209127298982548": true}, "3.5209127298982548": {"4.395263126807089": false}, "3.6613685875205926": {"4.136221404276677": true, "4.820040311128146": false}, "4.136221404276677": {"4.269727354097138": true}, "4.269727354097138": {}, "4.017926338388645": {"4.939951875899513": false}, "4.678580808747876": {}}, {"1": {"0.15438531024406338": false, "0.6012080300557974": true, "1.5692350069948657": true, "1.8039781042536593": true, "1.8601032113401863": false, "2.248209298294838": true, "3.6613685875205926": true, "4.017926338388645": true, "4.678580808747876": true}, "0.6012080300557974": {"0.8072079279572177": true, "1.0021931466850718": true, "1.1059777208710153": true, "3.3208500221945068": false, "3.460027174762763": true, "3.612596681020749": false, "4.620545836972225": false}, "0.8072079279572177": {"0.8083036096636488": true, "1.489025245752687": false, "1.688949493364202": false, "3.0515786960742908": false, "3.053056474424691": false}, "0.8083036096636488": {"1.1476826151544048": false, "1.6747920077805454": false, "2.117095042646968": true, "2.177428392257466": true, "2.3703241262220045": false, "3.036348670585614": false, "3.5929484664661198": false, "4.706811303158679": false}, "2.117095042646968": {"3.2783539040267176": true, "3.576971637172915": true, "4.103936774892654": false, "4.138934754323617": false, "4.442190056783633": false}, "3.2783539040267176": {"3.567694636810174": false, "4.021070139114411": false}, "3.576971637172915": {}, "2.177428392257466": {"2.2563865457084535": false, "2.5395138616750006": true, "2.8618801729804586": false}, "2.5395138616750006": {"2.8491400771911453": true, "4.158487664300259": true, "4.5923126054172165": false}, "2.8491400771911453": {"3.2435989817729287": false, "3.2573337503387174": false, "3.610654155440974": false, "4.688300977706366": true, "4.829175010449133": false}, "4.688300977706366": {"4.957327103164111": true}, "4.957327103164111": {}, "4.158487664300259": {"4.50763294512385": false, "4.774870029158423": true}, "4.774870029158423": {}, "1.0021931466850718": {"2.492046262395359": false, "3.4716351315431693": false, "4.29699746428578": false}, "1.1059777208710153": {"3.548105315019394": false, "3.6059101012223125": false, "3.7728195297940323": false, "4.881077149240405": false}, "3.460027174762763": {"4.578399834661159": false, "4.622066521779834": false, "4.681338671145914": false, "4.805759284172403": false}, "1.5692350069948657": {"2.677391755199446": false, "4.318714079233654": false}, "1.8039781042536593": {"2.368138499024213": true, "3.5328123356929675": false}, "2.368138499024213": {"2.4439498578978003": true, "2.8707689926368425": false, "3.0553596367453757": true, "3.579207733296172": false}, "2.4439498578978003": {"2.853933198949305": true, "3.522023920285092": false}, "2.853933198949305": {"3.8912299209096823": false, "4.049341709219163": false, "4.969750888219265": false}, "3.0553596367453757": {"3.2197178301776654": true, "3.587308860929409": true, "3.890412098877804": false, "4.411134441601339": false, "4.507328086745075": false, "4.605153639252816": false}, "3.2197178301776654": {"3.8328173336065685": false, "4.3815248859995455": false}, "3.587308860929409": {"4.452317024354366": false}, "2.248209298294838": {"2.8674629212075056": true, "3.8689948923724957": false, "4.11562787796857": false, "4.164916473588119": false, "4.173537356469909": false, "4.215047557429487": false, "4.500527584436251": false}, "2.8674629212075056": {"3.5209127298982548": true}, "3.5209127298982548": {"4.395263126807089": false}, "3.6613685875205926": {"4.136221404276677": true, "4.820040311128146": false}, "4.136221404276677": {"4.269727354097138": true}, "4.269727354097138": {}, "4.017926338388645": {"4.939951875899513": false}, "4.678580808747876": {}}, {"1": {"0.15438531024406338": false, "0.6012080300557974": true, "1.5692350069948657": true, "1.8039781042536593": true, "1.8601032113401863": false, "2.248209298294838": true, "3.6613685875205926": true, "4.017926338388645": true, "4.678580808747876": true}, "0.6012080300557974": {"0.8072079279572177": true, "1.0021931466850718": true, "1.1059777208710153": true, "3.3208500221945068": false, "3.460027174762763": true, "3.612596681020749": false, "4.620545836972225": false}, "0.8072079279572177": {"0.8083036096636488": true, "1.489025245752687": false, "1.688949493364202": false, "3.0515786960742908": false, "3.053056474424691": false}, "0.8083036096636488": {"1.1476826151544048": false, "1.6747920077805454": false, "2.117095042646968": true, "2.177428392257466": true, "2.3703241262220045": false, "3.036348670585614": false, "3.5929484664661198": false, "4.706811303158679": false}, "2.117095042646968": {"3.2783539040267176": true, "3.576971637172915": true, "4.103936774892654": false, "4.138934754323617": false, "4.442190056783633": false}, "3.2783539040267176": {"3.567694636810174": false, "4.021070139114411": false}, "3.576971637172915": {}, "2.177428392257466": {"2.2563865457084535": false, "2.5395138616750006": true, "2.8618801729804586": false}, "2.5395138616750006": {"2.8491400771911453": true, "4.158487664300259": true, "4.5923126054172165": false}, "2.8491400771911453": {"3.2435989817729287": false, "3.2573337503387174": false, "3.610654155440974": false, "4.688300977706366": true, "4.829175010449133": false}, "4.688300977706366": {"4.957327103164111": true}, "4.957327103164111": {}, "4.158487664300259": {"4.50763294512385": false, "4.774870029158423": true}, "4.774870029158423": {}, "1.0021931466850718": {"2.492046262395359": false, "3.4716351315431693": false, "4.29699746428578": false}, "1.1059777208710153": {"3.548105315019394": false, "3.6059101012223125": false, "3.7728195297940323": false, "4.881077149240405": false}, "3.460027174762763": {"4.578399834661159": false, "4.622066521779834": false, "4.681338671145914": false, "4.805759284172403": false}, "1.5692350069948657": {"2.677391755199446": false, "4.318714079233654": false}, "1.8039781042536593": {"2.368138499024213": true, "3.5328123356929675": false}, "2.368138499024213": {"2.4439498578978003": true, "2.8707689926368425": false, "3.0553596367453757": true, "3.579207733296172": false}, "2.4439498578978003": {"2.853933198949305": true, "3.522023920285092": false}, "2.853933198949305": {"3.8912299209096823": false, "4.049341709219163": false, "4.969750888219265": false}, "3.0553596367453757": {"3.2197178301776654": true, "3.587308860929409": true, "3.890412098877804": false, "4.411134441601339": false, "4.507328086745075": false, "4.605153639252816": false}, "3.2197178301776654": {"3.8328173336065685": false, "4.3815248859995455": false}, "3.587308860929409": {"4.452317024354366": false}, "2.248209298294838": {"2.8674629212075056": true, "3.8689948923724957": false, "4.11562787796857": false, "4.164916473588119": false, "4.173537356469909": false, "4.215047557429487": false, "4.500527584436251": false}, "2.8674629212075056": {"3.5209127298982548": true}, "3.5209127298982548": {"4.395263126807089": false}, "3.6613685875205926": {"4.136221404276677": true, "4.820040311128146": false}, "4.136221404276677": {"4.269727354097138": true}, "4.269727354097138": {}, "4.017926338388645": {"4.939951875899513": false}, "4.678580808747876": {}}, {"1": {"0.15438531024406338": false, "0.6012080300557974": true, "1.5692350069948657": true, "1.8039781042536593": true, "1.8601032113401863": false, "2.248209298294838": true, "3.6613685875205926": true, "4.017926338388645": true, "4.678580808747876": true}, "0.6012080300557974": {"0.8072079279572177": true, "1.0021931466850718": true, "1.1059777208710153": true, "3.3208500221945068": false, "3.460027174762763": true, "3.612596681020749": false, "4.620545836972225": false}, "0.8072079279572177": {"0.8083036096636488": true, "1.489025245752687": false, "1.688949493364202": false, "3.0515786960742908": false, "3.053056474424691": false}, "0.8083036096636488": {"1.1476826151544048": false, "1.6747920077805454": false, "2.117095042646968": true, "2.177428392257466": true, "2.3703241262220045": false, "3.036348670585614": false, "3.5929484664661198": false, "4.706811303158679": false}, "2.117095042646968": {"3.2783539040267176": true, "3.576971637172915": true, "4.103936774892654": false, "4.138934754323617": false, "4.442190056783633": false}, "3.2783539040267176": {"3.567694636810174": false, "4.021070139114411": false}, "3.576971637172915": {}, "2.177428392257466": {"2.2563865457084535": false, "2.5395138616750006": true, "2.8618801729804586": false}, "2.5395138616750006": {"2.8491400771911453": true, "4.158487664300259": true, "4.5923126054172165": false}, "2.8491400771911453": {"3.2435989817729287": false, "3.2573337503387174": false, "3.610654155440974": false, "4.688300977706366": true, "4.829175010449133": false}, "4.688300977706366": {"4.957327103164111": true}, "4.957327103164111": {}, "4.158487664300259": {"4.50763294512385": false, "4.774870029158423": true}, "4.774870029158423": {}, "1.0021931466850718": {"2.492046262395359": false, "3.4716351315431693": false, "4.29699746428578": false}, "1.1059777208710153": {"3.548105315019394": false, "3.6059101012223125": false, "3.7728195297940323": false, "4.881077149240405": false}, "3.460027174762763": {"4.578399834661159": false, "4.622066521779834": false, "4.681338671145914": false, "4.805759284172403": false}, "1.5692350069948657": {"2.677391755199446": false, "4.318714079233654": false}, "1.8039781042536593": {"2.368138499024213": true, "3.5328123356929675": false}, "2.368138499024213": {"2.4439498578978003": true, "2.8707689926368425": false, "3.0553596367453757": true, "3.579207733296172": false}, "2.4439498578978003": {"2.853933198949305": true, "3.522023920285092": false}, "2.853933198949305": {"3.8912299209096823": false, "4.049341709219163": false, "4.969750888219265": false}, "3.0553596367453757": {"3.2197178301776654": true, "3.587308860929409": true, "3.890412098877804": false, "4.411134441601339": false, "4.507328086745075": false, "4.605153639252816": false}, "3.2197178301776654": {"3.8328173336065685": false, "4.3815248859995455": false}, "3.587308860929409": {"4.452317024354366": false}, "2.248209298294838": {"2.8674629212075056": true, "3.8689948923724957": false, "4.11562787796857": false, "4.164916473588119": false, "4.173537356469909": false, "4.215047557429487": false, "4.500527584436251": false}, "2.8674629212075056": {"3.5209127298982548": true}, "3.5209127298982548": {"4.395263126807089": false}, "3.6613685875205926": {"4.136221404276677": true, "4.820040311128146": false}, "4.136221404276677": {"4.269727354097138": true}, "4.269727354097138": {}, "4.017926338388645": {"4.939951875899513": false}, "4.678580808747876": {}}, {"1": {"0.15438531024406338": false, "0.6012080300557974": true, "1.5692350069948657": true, "1.8039781042536593": true, "1.8601032113401863": false, "2.248209298294838": true, "3.6613685875205926": true, "4.017926338388645": true, "4.678580808747876": true}, "0.6012080300557974": {"0.8072079279572177": true, "1.0021931466850718": true, "1.1059777208710153": true, "3.3208500221945068": false, "3.460027174762763": true, "3.612596681020749": false, "4.620545836972225": false}, "0.8072079279572177": {"0.8083036096636488": true, "1.489025245752687": false, "1.688949493364202": false, "3.0515786960742908": false, "3.053056474424691": false}, "0.8083036096636488": {"1.1476826151544048": false, "1.6747920077805454": false, "2.117095042646968": true, "2.177428392257466": true, "2.3703241262220045": false, "3.036348670585614": false, "3.5929484664661198": false, "4.706811303158679": false}, "2.117095042646968": {"3.2783539040267176": true, "3.576971637172915": true, "4.103936774892654": false, "4.138934754323617": false, "4.442190056783633": false}, "3.2783539040267176": {"3.567694636810174": false, "4.021070139114411": false}, "3.576971637172915": {}, "2.177428392257466": {"2.2563865457084535": false, "2.5395138616750006": true, "2.8618801729804586": false}, "2.5395138616750006": {"2.8491400771911453": true, "4.158487664300259": true, "4.5923126054172165": false}, "2.8491400771911453": {"3.2435989817729287": false, "3.2573337503387174": false, "3.610654155440974": false, "4.688300977706366": true, "4.829175010449133": false}, "4.688300977706366": {"4.957327103164111": true}, "4.957327103164111": {}, "4.158487664300259": {"4.50763294512385": false, "4.774870029158423": true}, "4.774870029158423": {}, "1.0021931466850718": {"2.492046262395359": false, "3.4716351315431693": false, "4.29699746428578": false}, "1.1059777208710153": {"3.548105315019394": false, "3.6059101012223125": false, "3.7728195297940323": false, "4.881077149240405": false}, "3.460027174762763": {"4.578399834661159": false, "4.622066521779834": false, "4.681338671145914": false, "4.805759284172403": false}, "1.5692350069948657": {"2.677391755199446": false, "4.318714079233654": false}, "1.8039781042536593": {"2.368138499024213": true, "3.5328123356929675": false}, "2.368138499024213": {"2.4439498578978003": true, "2.8707689926368425": false, "3.0553596367453757": true, "3.579207733296172": false}, "2.4439498578978003": {"2.853933198949305": true, "3.522023920285092": false}, "2.853933198949305": {"3.8912299209096823": false, "4.049341709219163": false, "4.969750888219265": false}, "3.0553596367453757": {"3.2197178301776654": true, "3.587308860929409": true, "3.890412098877804": false, "4.411134441601339": false, "4.507328086745075": false, "4.605153639252816": false}, "3.2197178301776654": {"3.8328173336065685": false, "4.3815248859995455": false}, "3.587308860929409": {"4.452317024354366": false}, "2.248209298294838": {"2.8674629212075056": true, "3.8689948923724957": false, "4.11562787796857": false, "4.164916473588119": false, "4.173537356469909": false, "4.215047557429487": false, "4.500527584436251": false}, "2.8674629212075056": {"3.5209127298982548": true}, "3.5209127298982548": {"4.395263126807089": false}, "3.6613685875205926": {"4.136221404276677": true, "4.820040311128146": false}, "4.136221404276677": {"4.269727354097138": true}, "4.269727354097138": {}, "4.017926338388645": {"4.939951875899513": false}, "4.678580808747876": {}}, {"1": {"0.15438531024406338": false, "0.6012080300557974": true, "1.5692350069948657": true, "1.8039781042536593": true, "1.8601032113401863": false, "2.248209298294838": true, "3.6613685875205926": true, "4.017926338388645": true, "4.678580808747876": true}, "0.6012080300557974": {"0.8072079279572177": true, "1.0021931466850718": true, "1.1059777208710153": true, "3.3208500221945068": false, "3.460027174762763": true, "3.612596681020749": false, "4.620545836972225": false}, "0.8072079279572177": {"0.8083036096636488": true, "1.489025245752687": false, "1.688949493364202": false, "3.0515786960742908": false, "3.053056474424691": false}, "0.8083036096636488": {"1.1476826151544048": false, "1.6747920077805454": false, "2.117095042646968": true, "2.177428392257466": true, "2.3703241262220045": false, "3.036348670585614": false, "3.5929484664661198": false, "4.706811303158679": false}, "2.117095042646968": {"3.2783539040267176": true, "3.576971637172915": true, "4.103936774892654": false, "4.138934754323617": false, "4.442190056783633": false}, "3.2783539040267176": {"3.567694636810174": false, "4.021070139114411": false}, "3.576971637172915": {}, "2.177428392257466": {"2.2563865457084535": false, "2.5395138616750006": true, "2.8618801729804586": false}, "2.5395138616750006": {"2.8491400771911453": true, "4.158487664300259": true, "4.5923126054172165": false}, "2.8491400771911453": {"3.2435989817729287": false, "3.2573337503387174": false, "3.610654155440974": false, "4.688300977706366": true, "4.829175010449133": false}, "4.688300977706366": {"4.957327103164111": true}, "4.957327103164111": {}, "4.158487664300259": {"4.50763294512385": false, "4.774870029158423": true}, "4.774870029158423": {}, "1.0021931466850718": {"2.492046262395359": false, "3.4716351315431693": false, "4.29699746428578": false}, "1.1059777208710153": {"3.548105315019394": false, "3.6059101012223125": false, "3.7728195297940323": false, "4.881077149240405": false}, "3.460027174762763": {"4.578399834661159": false, "4.622066521779834": false, "4.681338671145914": false, "4.805759284172403": false}, "1.5692350069948657": {"2.677391755199446": false, "4.318714079233654": false}, "1.8039781042536593": {"2.368138499024213": true, "3.5328123356929675": false}, "2.368138499024213": {"2.4439498578978003": true, "2.8707689926368425": false, "3.0553596367453757": true, "3.579207733296172": false}, "2.4439498578978003": {"2.853933198949305": true, "3.522023920285092": false}, "2.853933198949305": {"3.8912299209096823": false, "4.049341709219163": false, "4.969750888219265": false}, "3.0553596367453757": {"3.2197178301776654": true, "3.587308860929409": true, "3.890412098877804": false, "4.411134441601339": false, "4.507328086745075": false, "4.605153639252816": false}, "3.2197178301776654": {"3.8328173336065685": false, "4.3815248859995455": false}, "3.587308860929409": {"4.452317024354366": false}, "2.248209298294838": {"2.8674629212075056": true, "3.8689948923724957": false, "4.11562787796857": false, "4.164916473588119": false, "4.173537356469909": false, "4.215047557429487": false, "4.500527584436251": false}, "2.8674629212075056": {"3.5209127298982548": true}, "3.5209127298982548": {"4.395263126807089": false}, "3.6613685875205926": {"4.136221404276677": true, "4.820040311128146": false}, "4.136221404276677": {"4.269727354097138": true}, "4.269727354097138": {}, "4.017926338388645": {"4.939951875899513": false}, "4.678580808747876": {}}, {"1": {"0.15438531024406338": false, "0.6012080300557974": true, "1.5692350069948657": true, "1.8039781042536593": true, "1.8601032113401863": false, "2.248209298294838": true, "3.6613685875205926": true, "4.017926338388645": true, "4.678580808747876": true}, "0.6012080300557974": {"0.8072079279572177": true, "1.0021931466850718": true, "1.1059777208710153": true, "3.3208500221945068": false, "3.460027174762763": true, "3.612596681020749": false, "4.620545836972225": false}, "0.8072079279572177": {"0.8083036096636488": true, "1.489025245752687": false, "1.688949493364202": false, "3.0515786960742908": false, "3.053056474424691": false}, "0.8083036096636488": {"1.1476826151544048": false, "1.6747920077805454": false, "2.117095042646968": true, "2.177428392257466": true, "2.3703241262220045": false, "3.036348670585614": false, "3.5929484664661198": false, "4.706811303158679": false}, "2.117095042646968": {"3.2783539040267176": true, "3.576971637172915": true, "4.103936774892654": false, "4.138934754323617": false, "4.442190056783633": false}, "3.2783539040267176": {"3.567694636810174": false, "4.021070139114411": false}, "3.576971637172915": {}, "2.177428392257466": {"2.2563865457084535": false, "2.5395138616750006": true, "2.8618801729804586": false}, "2.5395138616750006": {"2.8491400771911453": true, "4.158487664300259": true, "4.5923126054172165": false}, "2.8491400771911453": {"3.2435989817729287": false, "3.2573337503387174": false, "3.610654155440974": false, "4.688300977706366": true, "4.829175010449133": false}, "4.688300977706366": {"4.957327103164111": true}, "4.957327103164111": {}, "4.158487664300259": {"4.50763294512385": false, "4.774870029158423": true}, "4.774870029158423": {}, "1.0021931466850718": {"2.492046262395359": false, "3.4716351315431693": false, "4.29699746428578": false}, "1.1059777208710153": {"3.548105315019394": false, "3.6059101012223125": false, "3.7728195297940323": false, "4.881077149240405": false}, "3.460027174762763": {"4.578399834661159": false, "4.622066521779834": false, "4.681338671145914": false, "4.805759284172403": false}, "1.5692350069948657": {"2.677391755199446": false, "4.318714079233654": false}, "1.8039781042536593": {"2.368138499024213": true, "3.5328123356929675": false}, "2.368138499024213": {"2.4439498578978003": true, "2.8707689926368425": false, "3.0553596367453757": true, "3.579207733296172": false}, "2.4439498578978003": {"2.853933198949305": true, "3.522023920285092": false}, "2.853933198949305": {"3.8912299209096823": false, "4.049341709219163": false, "4.969750888219265": false}, "3.0553596367453757": {"3.2197178301776654": true, "3.587308860929409": true, "3.890412098877804": false, "4.411134441601339": false, "4.507328086745075": false, "4.605153639252816": false}, "3.2197178301776654": {"3.8328173336065685": false, "4.3815248859995455": false}, "3.587308860929409": {"4.452317024354366": false}, "2.248209298294838": {"2.8674629212075056": true, "3.8689948923724957": false, "4.11562787796857": false, "4.164916473588119": false, "4.173537356469909": false, "4.215047557429487": false, "4.500527584436251": false}, "2.8674629212075056": {"3.5209127298982548": true}, "3.5209127298982548": {"4.395263126807089": false}, "3.6613685875205926": {"4.136221404276677": true, "4.820040311128146": false}, "4.136221404276677": {"4.269727354097138": true}, "4.269727354097138": {}, "4.017926338388645": {"4.939951875899513": false}, "4.678580808747876": {}}, {"1": {"0.15438531024406338": false, "0.6012080300557974": true, "1.5692350069948657": true, "1.8039781042536593": true, "1.8601032113401863": false, "2.248209298294838": true, "3.6613685875205926": true, "4.017926338388645": true, "4.678580808747876": true}, "0.6012080300557974": {"0.8072079279572177": true, "1.0021931466850718": true, "1.1059777208710153": true, "3.3208500221945068": false, "3.460027174762763": true, "3.612596681020749": false, "4.620545836972225": false}, "0.8072079279572177": {"0.8083036096636488": true, "1.489025245752687": false, "1.688949493364202": false, "3.0515786960742908": false, "3.053056474424691": false}, "0.8083036096636488": {"1.1476826151544048": false, "1.6747920077805454": false, "2.117095042646968": true, "2.177428392257466": true, "2.3703241262220045": false, "3.036348670585614": false, "3.5929484664661198": false, "4.706811303158679": false}, "2.117095042646968": {"3.2783539040267176": true, "3.576971637172915": true, "4.103936774892654": false, "4.138934754323617": false, "4.442190056783633": false}, "3.2783539040267176": {"3.567694636810174": false, "4.021070139114411": false}, "3.576971637172915": {}, "2.177428392257466": {"2.2563865457084535": false, "2.5395138616750006": true, "2.8618801729804586": false}, "2.5395138616750006": {"2.8491400771911453": true, "4.158487664300259": true, "4.5923126054172165": false}, "2.8491400771911453": {"3.2435989817729287": false, "3.2573337503387174": false, "3.610654155440974": false, "4.688300977706366": true, "4.829175010449133": false}, "4.688300977706366": {"4.957327103164111": true}, "4.957327103164111": {}, "4.158487664300259": {"4.50763294512385": false, "4.774870029158423": true}, "4.774870029158423": {}, "1.0021931466850718": {"2.492046262395359": false, "3.4716351315431693": false, "4.29699746428578": false}, "1.1059777208710153": {"3.548105315019394": false, "3.6059101012223125": false, "3.7728195297940323": false, "4.881077149240405": false}, "3.460027174762763": {"4.578399834661159": false, "4.622066521779834": false, "4.681338671145914": false, "4.805759284172403": false}, "1.5692350069948657": {"2.677391755199446": false, "4.318714079233654": false}, "1.8039781042536593": {"2.368138499024213": true, "3.5328123356929675": false}, "2.368138499024213": {"2.4439498578978003": true, "2.8707689926368425": false, "3.0553596367453757": true, "3.579207733296172": false}, "2.4439498578978003": {"2.853933198949305": true, "3.522023920285092": false}, "2.853933198949305": {"3.8912299209096823": false, "4.049341709219163": false, "4.969750888219265": false}, "3.0553596367453757": {"3.2197178301776654": true, "3.587308860929409": true, "3.890412098877804": false, "4.411134441601339": false, "4.507328086745075": false, "4.605153639252816": false}, "3.2197178301776654": {"3.8328173336065685": false, "4.3815248859995455": false}, "3.587308860929409": {"4.452317024354366": false}, "2.248209298294838": {"2.8674629212075056": true, "3.8689948923724957": false, "4.11562787796857": false, "4.164916473588119": false, "4.173537356469909": false, "4.215047557429487": false, "4.500527584436251": false}, "2.8674629212075056": {"3.5209127298982548": true}, "3.5209127298982548": {"4.395263126807089": false}, "3.6613685875205926": {"4.136221404276677": true, "4.820040311128146": false}, "4.136221404276677": {"4.269727354097138": true}, "4.269727354097138": {}, "4.017926338388645": {"4.939951875899513": false}, "4.678580808747876": {}}, {"1": {"0.15438531024406338": false, "0.6012080300557974": true, "1.5692350069948657": true, "1.8039781042536593": true, "1.8601032113401863": false, "2.248209298294838": true, "3.6613685875205926": true, "4.017926338388645": true, "4.678580808747876": true}, "0.6012080300557974": {"0.8072079279572177": true, "1.0021931466850718": true, "1.1059777208710153": true, "3.3208500221945068": false, "3.460027174762763": true, "3.612596681020749": false, "4.620545836972225": false}, "0.8072079279572177": {"0.8083036096636488": true, "1.489025245752687": false, "1.688949493364202": false, "3.0515786960742908": false, "3.053056474424691": false}, "0.8083036096636488": {"1.1476826151544048": false, "1.6747920077805454": false, "2.117095042646968": true, "2.177428392257466": true, "2.3703241262220045": false, "3.036348670585614": false, "3.5929484664661198": false, "4.706811303158679": false}, "2.117095042646968": {"3.2783539040267176": true, "3.576971637172915": true, "4.103936774892654": false, "4.138934754323617": false, "4.442190056783633": false}, "3.2783539040267176": {"3.567694636810174": false, "4.021070139114411": false}, "3.576971637172915": {}, "2.177428392257466": {"2.2563865457084535": false, "2.5395138616750006": true, "2.8618801729804586": false}, "2.5395138616750006": {"2.8491400771911453": true, "4.158487664300259": true, "4.5923126054172165": false}, "2.8491400771911453": {"3.2435989817729287": false, "3.2573337503387174": false, "3.610654155440974": false, "4.688300977706366": true, "4.829175010449133": false}, "4.688300977706366": {"4.957327103164111": true}, "4.957327103164111": {}, "4.158487664300259": {"4.50763294512385": false, "4.774870029158423": true}, "4.774870029158423": {}, "1.0021931466850718": {"2.492046262395359": false, "3.4716351315431693": false, "4.29699746428578": false}, "1.1059777208710153": {"3.548105315019394": false, "3.6059101012223125": false, "3.7728195297940323": false, "4.881077149240405": false}, "3.460027174762763": {"4.578399834661159": false, "4.622066521779834": false, "4.681338671145914": false, "4.805759284172403": false}, "1.5692350069948657": {"2.677391755199446": false, "4.318714079233654": false}, "1.8039781042536593": {"2.368138499024213": true, "3.5328123356929675": false}, "2.368138499024213": {"2.4439498578978003": true, "2.8707689926368425": false, "3.0553596367453757": true, "3.579207733296172": false}, "2.4439498578978003": {"2.853933198949305": true, "3.522023920285092": false}, "2.853933198949305": {"3.8912299209096823": false, "4.049341709219163": false, "4.969750888219265": false}, "3.0553596367453757": {"3.2197178301776654": true, "3.587308860929409": true, "3.890412098877804": false, "4.411134441601339": false, "4.507328086745075": false, "4.605153639252816": false}, "3.2197178301776654": {"3.8328173336065685": false, "4.3815248859995455": false}, "3.587308860929409": {"4.452317024354366": false}, "2.248209298294838": {"2.8674629212075056": true, "3.8689948923724957": false, "4.11562787796857": false, "4.164916473588119": false, "4.173537356469909": false, "4.215047557429487": false, "4.500527584436251": false}, "2.8674629212075056": {"3.5209127298982548": true}, "3.5209127298982548": {"4.395263126807089": false}, "3.6613685875205926": {"4.136221404276677": true, "4.820040311128146": false}, "4.136221404276677": {"4.269727354097138": true}, "4.269727354097138": {}, "4.017926338388645": {"4.939951875899513": false}, "4.678580808747876": {}}, {"1": {"0.15438531024406338": false, "0.6012080300557974": true, "1.5692350069948657": true, "1.8039781042536593": true, "1.8601032113401863": false, "2.248209298294838": true, "3.6613685875205926": true, "4.017926338388645": true, "4.678580808747876": true}, "0.6012080300557974": {"0.8072079279572177": true, "1.0021931466850718": true, "1.1059777208710153": true, "3.3208500221945068": false, "3.460027174762763": true, "3.612596681020749": false, "4.620545836972225": false}, "0.8072079279572177": {"0.8083036096636488": true, "1.489025245752687": false, "1.688949493364202": false, "3.0515786960742908": false, "3.053056474424691": false}, "0.8083036096636488": {"1.1476826151544048": false, "1.6747920077805454": false, "2.117095042646968": true, "2.177428392257466": true, "2.3703241262220045": false, "3.036348670585614": false, "3.5929484664661198": false, "4.706811303158679": false}, "2.117095042646968": {"3.2783539040267176": true, "3.576971637172915": true, "4.103936774892654": false, "4.138934754323617": false, "4.442190056783633": false}, "3.2783539040267176": {"3.567694636810174": false, "4.021070139114411": false}, "3.576971637172915": {}, "2.177428392257466": {"2.2563865457084535": false, "2.5395138616750006": true, "2.8618801729804586": false}, "2.5395138616750006": {"2.8491400771911453": true, "4.158487664300259": true, "4.5923126054172165": false}, "2.8491400771911453": {"3.2435989817729287": false, "3.2573337503387174": false, "3.610654155440974": false, "4.688300977706366": true, "4.829175010449133": false}, "4.688300977706366": {"4.957327103164111": true}, "4.957327103164111": {}, "4.158487664300259": {"4.50763294512385": false, "4.774870029158423": true}, "4.774870029158423": {}, "1.0021931466850718": {"2.492046262395359": false, "3.4716351315431693": false, "4.29699746428578": false}, "1.1059777208710153": {"3.548105315019394": false, "3.6059101012223125": false, "3.7728195297940323": false, "4.881077149240405": false}, "3.460027174762763": {"4.578399834661159": false, "4.622066521779834": false, "4.681338671145914": false, "4.805759284172403": false}, "1.5692350069948657": {"2.677391755199446": false, "4.318714079233654": false}, "1.8039781042536593": {"2.368138499024213": true, "3.5328123356929675": false}, "2.368138499024213": {"2.4439498578978003": true, "2.8707689926368425": false, "3.0553596367453757": true, "3.579207733296172": false}, "2.4439498578978003": {"2.853933198949305": true, "3.522023920285092": false}, "2.853933198949305": {"3.8912299209096823": false, "4.049341709219163": false, "4.969750888219265": false}, "3.0553596367453757": {"3.2197178301776654": true, "3.587308860929409": true, "3.890412098877804": false, "4.411134441601339": false, "4.507328086745075": false, "4.605153639252816": false}, "3.2197178301776654": {"3.8328173336065685": false, "4.3815248859995455": false}, "3.587308860929409": {"4.452317024354366": false}, "2.248209298294838": {"2.8674629212075056": true, "3.8689948923724957": false, "4.11562787796857": false, "4.164916473588119": false, "4.173537356469909": false, "4.215047557429487": false, "4.500527584436251": false}, "2.8674629212075056": {"3.5209127298982548": true}, "3.5209127298982548": {"4.395263126807089": false}, "3.6613685875205926": {"4.136221404276677": true, "4.820040311128146": false}, "4.136221404276677": {"4.269727354097138": true}, "4.269727354097138": {}, "4.017926338388645": {"4.939951875899513": false}, "4.678580808747876": {}}, {"1": {"0.15438531024406338": false, "0.6012080300557974": true, "1.5692350069948657": true, "1.8039781042536593": true, "1.8601032113401863": false, "2.248209298294838": true, "3.6613685875205926": true, "4.017926338388645": true, "4.678580808747876": true}, "0.6012080300557974": {"0.8072079279572177": true, "1.0021931466850718": true, "1.1059777208710153": true, "3.3208500221945068": false, "3.460027174762763": true, "3.612596681020749": false, "4.620545836972225": false}, "0.8072079279572177": {"0.8083036096636488": true, "1.489025245752687": false, "1.688949493364202": false, "3.0515786960742908": false, "3.053056474424691": false}, "0.8083036096636488": {"1.1476826151544048": false, "1.6747920077805454": false, "2.117095042646968": true, "2.177428392257466": true, "2.3703241262220045": false, "3.036348670585614": false, "3.5929484664661198": false, "4.706811303158679": false}, "2.117095042646968": {"3.2783539040267176": true, "3.576971637172915": true, "4.103936774892654": false, "4.138934754323617": false, "4.442190056783633": false}, "3.2783539040267176": {"3.567694636810174": false, "4.021070139114411": false}, "3.576971637172915": {}, "2.177428392257466": {"2.2563865457084535": false, "2.5395138616750006": true, "2.8618801729804586": false}, "2.5395138616750006": {"2.8491400771911453": true, "4.158487664300259": true, "4.5923126054172165": false}, "2.8491400771911453": {"3.2435989817729287": false, "3.2573337503387174": false, "3.610654155440974": false, "4.688300977706366": true, "4.829175010449133": false}, "4.688300977706366": {"4.957327103164111": true}, "4.957327103164111": {}, "4.158487664300259": {"4.50763294512385": false, "4.774870029158423": true}, "4.774870029158423": {}, "1.0021931466850718": {"2.492046262395359": false, "3.4716351315431693": false, "4.29699746428578": false}, "1.1059777208710153": {"3.548105315019394": false, "3.6059101012223125": false, "3.7728195297940323": false, "4.881077149240405": false}, "3.460027174762763": {"4.578399834661159": false, "4.622066521779834": false, "4.681338671145914": false, "4.805759284172403": false}, "1.5692350069948657": {"2.677391755199446": false, "4.318714079233654": false}, "1.8039781042536593": {"2.368138499024213": true, "3.5328123356929675": false}, "2.368138499024213": {"2.4439498578978003": true, "2.8707689926368425": false, "3.0553596367453757": true, "3.579207733296172": false}, "2.4439498578978003": {"2.853933198949305": true, "3.522023920285092": false}, "2.853933198949305": {"3.8912299209096823": false, "4.049341709219163": false, "4.969750888219265": false}, "3.0553596367453757": {"3.2197178301776654": true, "3.587308860929409": true, "3.890412098877804": false, "4.411134441601339": false, "4.507328086745075": false, "4.605153639252816": false}, "3.2197178301776654": {"3.8328173336065685": false, "4.3815248859995455": false}, "3.587308860929409": {"4.452317024354366": false}, "2.248209298294838": {"2.8674629212075056": true, "3.8689948923724957": false, "4.11562787796857": false, "4.164916473588119": false, "4.173537356469909": false, "4.215047557429487": false, "4.500527584436251": false}, "2.8674629212075056": {"3.5209127298982548": true}, "3.5209127298982548": {"4.395263126807089": false}, "3.6613685875205926": {"4.136221404276677": true, "4.820040311128146": false}, "4.136221404276677": {"4.269727354097138": true}, "4.269727354097138": {}, "4.017926338388645": {"4.939951875899513": false}, "4.678580808747876": {}}, {"1": {"0.15438531024406338": false, "0.6012080300557974": true, "1.5692350069948657": true, "1.8039781042536593": true, "1.8601032113401863": false, "2.248209298294838": true, "3.6613685875205926": true, "4.017926338388645": true, "4.678580808747876": true}, "0.6012080300557974": {"0.8072079279572177": true, "1.0021931466850718": true, "1.1059777208710153": true, "3.3208500221945068": false, "3.460027174762763": true, "3.612596681020749": false, "4.620545836972225": false}, "0.8072079279572177": {"0.8083036096636488": true, "1.489025245752687": false, "1.688949493364202": false, "3.0515786960742908": false, "3.053056474424691": false}, "0.8083036096636488": {"1.1476826151544048": false, "1.6747920077805454": false, "2.117095042646968": true, "2.177428392257466": true, "2.3703241262220045": false, "3.036348670585614": false, "3.5929484664661198": false, "4.706811303158679": false}, "2.117095042646968": {"3.2783539040267176": true, "3.576971637172915": true, "4.103936774892654": false, "4.138934754323617": false, "4.442190056783633": false}, "3.2783539040267176": {"3.567694636810174": false, "4.021070139114411": false}, "3.576971637172915": {}, "2.177428392257466": {"2.2563865457084535": false, "2.5395138616750006": true, "2.8618801729804586": false}, "2.5395138616750006": {"2.8491400771911453": true, "4.158487664300259": true, "4.5923126054172165": false}, "2.8491400771911453": {"3.2435989817729287": false, "3.2573337503387174": false, "3.610654155440974": false, "4.688300977706366": true, "4.829175010449133": false}, "4.688300977706366": {"4.957327103164111": true}, "4.957327103164111": {}, "4.158487664300259": {"4.50763294512385": false, "4.774870029158423": true}, "4.774870029158423": {}, "1.0021931466850718": {"2.492046262395359": false, "3.4716351315431693": false, "4.29699746428578": false}, "1.1059777208710153": {"3.548105315019394": false, "3.6059101012223125": false, "3.7728195297940323": false, "4.881077149240405": false}, "3.460027174762763": {"4.578399834661159": false, "4.622066521779834": false, "4.681338671145914": false, "4.805759284172403": false}, "1.5692350069948657": {"2.677391755199446": false, "4.318714079233654": false}, "1.8039781042536593": {"2.368138499024213": true, "3.5328123356929675": false}, "2.368138499024213": {"2.4439498578978003": true, "2.8707689926368425": false, "3.0553596367453757": true, "3.579207733296172": false}, "2.4439498578978003": {"2.853933198949305": true, "3.522023920285092": false}, "2.853933198949305": {"3.8912299209096823": false, "4.049341709219163": false, "4.969750888219265": false}, "3.0553596367453757": {"3.2197178301776654": true, "3.587308860929409": true, "3.890412098877804": false, "4.411134441601339": false, "4.507328086745075": false, "4.605153639252816": false}, "3.2197178301776654": {"3.8328173336065685": false, "4.3815248859995455": false}, "3.587308860929409": {"4.452317024354366": false}, "2.248209298294838": {"2.8674629212075056": true, "3.8689948923724957": false, "4.11562787796857": false, "4.164916473588119": false, "4.173537356469909": false, "4.215047557429487": false, "4.500527584436251": false}, "2.8674629212075056": {"3.5209127298982548": true}, "3.5209127298982548": {"4.395263126807089": false}, "3.6613685875205926": {"4.136221404276677": true, "4.820040311128146": false}, "4.136221404276677": {"4.269727354097138": true}, "4.269727354097138": {}, "4.017926338388645": {"4.939951875899513": false}, "4.678580808747876": {}}, {"1": {"0.15438531024406338": false, "0.6012080300557974": true, "1.5692350069948657": true, "1.8039781042536593": true, "1.8601032113401863": false, "2.248209298294838": true, "3.6613685875205926": true, "4.017926338388645": true, "4.678580808747876": true}, "0.6012080300557974": {"0.8072079279572177": true, "1.0021931466850718": true, "1.1059777208710153": true, "3.3208500221945068": false, "3.460027174762763": true, "3.612596681020749": false, "4.620545836972225": false}, "0.8072079279572177": {"0.8083036096636488": true, "1.489025245752687": false, "1.688949493364202": false, "3.0515786960742908": false, "3.053056474424691": false}, "0.8083036096636488": {"1.1476826151544048": false, "1.6747920077805454": false, "2.117095042646968": true, "2.177428392257466": true, "2.3703241262220045": false, "3.036348670585614": false, "3.5929484664661198": false, "4.706811303158679": false}, "2.117095042646968": {"3.2783539040267176": true, "3.576971637172915": true, "4.103936774892654": false, "4.138934754323617": false, "4.442190056783633": false}, "3.2783539040267176": {"3.567694636810174": false, "4.021070139114411": false}, "3.576971637172915": {}, "2.177428392257466": {"2.2563865457084535": false, "2.5395138616750006": true, "2.8618801729804586": false}, "2.5395138616750006": {"2.8491400771911453": true, "4.158487664300259": true, "4.5923126054172165": false}, "2.8491400771911453": {"3.2435989817729287": false, "3.2573337503387174": false, "3.610654155440974": false, "4.688300977706366": true, "4.829175010449133": false}, "4.688300977706366": {"4.957327103164111": true}, "4.957327103164111": {}, "4.158487664300259": {"4.50763294512385": false, "4.774870029158423": true}, "4.774870029158423": {}, "1.0021931466850718": {"2.492046262395359": false, "3.4716351315431693": false, "4.29699746428578": false}, "1.1059777208710153": {"3.548105315019394": false, "3.6059101012223125": false, "3.7728195297940323": false, "4.881077149240405": false}, "3.460027174762763": {"4.578399834661159": false, "4.622066521779834": false, "4.681338671145914": false, "4.805759284172403": false}, "1.5692350069948657": {"2.677391755199446": false, "4.318714079233654": false}, "1.8039781042536593": {"2.368138499024213": true, "3.5328123356929675": false}, "2.368138499024213": {"2.4439498578978003": true, "2.8707689926368425": false, "3.0553596367453757": true, "3.579207733296172": false}, "2.4439498578978003": {"2.853933198949305": true, "3.522023920285092": false}, "2.853933198949305": {"3.8912299209096823": false, "4.049341709219163": false, "4.969750888219265": false}, "3.0553596367453757": {"3.2197178301776654": true, "3.587308860929409": true, "3.890412098877804": false, "4.411134441601339": false, "4.507328086745075": false, "4.605153639252816": false}, "3.2197178301776654": {"3.8328173336065685": false, "4.3815248859995455": false}, "3.587308860929409": {"4.452317024354366": false}, "2.248209298294838": {"2.8674629212075056": true, "3.8689948923724957": false, "4.11562787796857": false, "4.164916473588119": false, "4.173537356469909": false, "4.215047557429487": false, "4.500527584436251": false}, "2.8674629212075056": {"3.5209127298982548": true}, "3.5209127298982548": {"4.395263126807089": false}, "3.6613685875205926": {"4.136221404276677": true, "4.820040311128146": false}, "4.136221404276677": {"4.269727354097138": true}, "4.269727354097138": {}, "4.017926338388645": {"4.939951875899513": false}, "4.678580808747876": {}}, {"1": {"0.15438531024406338": false, "0.6012080300557974": true, "1.5692350069948657": true, "1.8039781042536593": true, "1.8601032113401863": false, "2.248209298294838": true, "3.6613685875205926": true, "4.017926338388645": true, "4.678580808747876": true}, "0.6012080300557974": {"0.8072079279572177": true, "1.0021931466850718": true, "1.1059777208710153": true, "3.3208500221945068": false, "3.460027174762763": true, "3.612596681020749": false, "4.620545836972225": false}, "0.8072079279572177": {"0.8083036096636488": true, "1.489025245752687": false, "1.688949493364202": false, "3.0515786960742908": false, "3.053056474424691": false}, "0.8083036096636488": {"1.1476826151544048": false, "1.6747920077805454": false, "2.117095042646968": true, "2.177428392257466": true, "2.3703241262220045": false, "3.036348670585614": false, "3.5929484664661198": false, "4.706811303158679": false}, "2.117095042646968": {"3.2783539040267176": true, "3.576971637172915": true, "4.103936774892654": false, "4.138934754323617": false, "4.442190056783633": false}, "3.2783539040267176": {"3.567694636810174": false, "4.021070139114411": false}, "3.576971637172915": {}, "2.177428392257466": {"2.2563865457084535": false, "2.5395138616750006": true, "2.8618801729804586": false}, "2.5395138616750006": {"2.8491400771911453": true, "4.158487664300259": true, "4.5923126054172165": false}, "2.8491400771911453": {"3.2435989817729287": false, "3.2573337503387174": false, "3.610654155440974": false, "4.688300977706366": true, "4.829175010449133": false}, "4.688300977706366": {"4.957327103164111": true}, "4.957327103164111": {}, "4.158487664300259": {"4.50763294512385": false, "4.774870029158423": true}, "4.774870029158423": {}, "1.0021931466850718": {"2.492046262395359": false, "3.4716351315431693": false, "4.29699746428578": false}, "1.1059777208710153": {"3.548105315019394": false, "3.6059101012223125": false, "3.7728195297940323": false, "4.881077149240405": false}, "3.460027174762763": {"4.578399834661159": false, "4.622066521779834": false, "4.681338671145914": false, "4.805759284172403": false}, "1.5692350069948657": {"2.677391755199446": false, "4.318714079233654": false}, "1.8039781042536593": {"2.368138499024213": true, "3.5328123356929675": false}, "2.368138499024213": {"2.4439498578978003": true, "2.8707689926368425": false, "3.0553596367453757": true, "3.579207733296172": false}, "2.4439498578978003": {"2.853933198949305": true, "3.522023920285092": false}, "2.853933198949305": {"3.8912299209096823": false, "4.049341709219163": false, "4.969750888219265": false}, "3.0553596367453757": {"3.2197178301776654": true, "3.587308860929409": true, "3.890412098877804": false, "4.411134441601339": false, "4.507328086745075": false, "4.605153639252816": false}, "3.2197178301776654": {"3.8328173336065685": false, "4.3815248859995455": false}, "3.587308860929409": {"4.452317024354366": false}, "2.248209298294838": {"2.8674629212075056": true, "3.8689948923724957": false, "4.11562787796857": false, "4.164916473588119": false, "4.173537356469909": false, "4.215047557429487": false, "4.500527584436251": false}, "2.8674629212075056": {"3.5209127298982548": true}, "3.5209127298982548": {"4.395263126807089": false}, "3.6613685875205926": {"4.136221404276677": true, "4.820040311128146": false}, "4.136221404276677": {"4.269727354097138": true}, "4.269727354097138": {}, "4.017926338388645": {"4.939951875899513": false}, "4.678580808747876": {}}, {"1": {"0.15438531024406338": false, "0.6012080300557974": true, "1.5692350069948657": true, "1.8039781042536593": true, "1.8601032113401863": false, "2.248209298294838": true, "3.6613685875205926": true, "4.017926338388645": true, "4.678580808747876": true}, "0.6012080300557974": {"0.8072079279572177": true, "1.0021931466850718": true, "1.1059777208710153": true, "3.3208500221945068": false, "3.460027174762763": true, "3.612596681020749": false, "4.620545836972225": false}, "0.8072079279572177": {"0.8083036096636488": true, "1.489025245752687": false, "1.688949493364202": false, "3.0515786960742908": false, "3.053056474424691": false}, "0.8083036096636488": {"1.1476826151544048": false, "1.6747920077805454": false, "2.117095042646968": true, "2.177428392257466": true, "2.3703241262220045": false, "3.036348670585614": false, "3.5929484664661198": false, "4.706811303158679": false}, "2.117095042646968": {"3.2783539040267176": true, "3.576971637172915": true, "4.103936774892654": false, "4.138934754323617": false, "4.442190056783633": false}, "3.2783539040267176": {"3.567694636810174": false, "4.021070139114411": false}, "3.576971637172915": {}, "2.177428392257466": {"2.2563865457084535": false, "2.5395138616750006": true, "2.8618801729804586": false}, "2.5395138616750006": {"2.8491400771911453": true, "4.158487664300259": true, "4.5923126054172165": false}, "2.8491400771911453": {"3.2435989817729287": false, "3.2573337503387174": false, "3.610654155440974": false, "4.688300977706366": true, "4.829175010449133": false}, "4.688300977706366": {"4.957327103164111": true}, "4.957327103164111": {}, "4.158487664300259": {"4.50763294512385": false, "4.774870029158423": true}, "4.774870029158423": {}, "1.0021931466850718": {"2.492046262395359": false, "3.4716351315431693": false, "4.29699746428578": false}, "1.1059777208710153": {"3.548105315019394": false, "3.6059101012223125": false, "3.7728195297940323": false, "4.881077149240405": false}, "3.460027174762763": {"4.578399834661159": false, "4.622066521779834": false, "4.681338671145914": false, "4.805759284172403": false}, "1.5692350069948657": {"2.677391755199446": false, "4.318714079233654": false}, "1.8039781042536593": {"2.368138499024213": true, "3.5328123356929675": false}, "2.368138499024213": {"2.4439498578978003": true, "2.8707689926368425": false, "3.0553596367453757": true, "3.579207733296172": false}, "2.4439498578978003": {"2.853933198949305": true, "3.522023920285092": false}, "2.853933198949305": {"3.8912299209096823": false, "4.049341709219163": false, "4.969750888219265": false}, "3.0553596367453757": {"3.2197178301776654": true, "3.587308860929409": true, "3.890412098877804": false, "4.411134441601339": false, "4.507328086745075": false, "4.605153639252816": false}, "3.2197178301776654": {"3.8328173336065685": false, "4.3815248859995455": false}, "3.587308860929409": {"4.452317024354366": false}, "2.248209298294838": {"2.8674629212075056": true, "3.8689948923724957": false, "4.11562787796857": false, "4.164916473588119": false, "4.173537356469909": false, "4.215047557429487": false, "4.500527584436251": false}, "2.8674629212075056": {"3.5209127298982548": true}, "3.5209127298982548": {"4.395263126807089": false}, "3.6613685875205926": {"4.136221404276677": true, "4.820040311128146": false}, "4.136221404276677": {"4.269727354097138": true}, "4.269727354097138": {}, "4.017926338388645": {"4.939951875899513": false}, "4.678580808747876": {}}, {"1": {"0.15438531024406338": false, "0.6012080300557974": true, "1.5692350069948657": true, "1.8039781042536593": true, "1.8601032113401863": false, "2.248209298294838": true, "3.6613685875205926": true, "4.017926338388645": true, "4.678580808747876": true}, "0.6012080300557974": {"0.8072079279572177": true, "1.0021931466850718": true, "1.1059777208710153": true, "3.3208500221945068": false, "3.460027174762763": true, "3.612596681020749": false, "4.620545836972225": false}, "0.8072079279572177": {"0.8083036096636488": true, "1.489025245752687": false, "1.688949493364202": false, "3.0515786960742908": false, "3.053056474424691": false}, "0.8083036096636488": {"1.1476826151544048": false, "1.6747920077805454": false, "2.117095042646968": true, "2.177428392257466": true, "2.3703241262220045": false, "3.036348670585614": false, "3.5929484664661198": false, "4.706811303158679": false}, "2.117095042646968": {"3.2783539040267176": true, "3.576971637172915": true, "4.103936774892654": false, "4.138934754323617": false, "4.442190056783633": false}, "3.2783539040267176": {"3.567694636810174": false, "4.021070139114411": false}, "3.576971637172915": {}, "2.177428392257466": {"2.2563865457084535": false, "2.5395138616750006": true, "2.8618801729804586": false}, "2.5395138616750006": {"2.8491400771911453": true, "4.158487664300259": true, "4.5923126054172165": false}, "2.8491400771911453": {"3.2435989817729287": false, "3.2573337503387174": false, "3.610654155440974": false, "4.688300977706366": true, "4.829175010449133": false}, "4.688300977706366": {"4.957327103164111": true}, "4.957327103164111": {}, "4.158487664300259": {"4.50763294512385": false, "4.774870029158423": true}, "4.774870029158423": {}, "1.0021931466850718": {"2.492046262395359": false, "3.4716351315431693": false, "4.29699746428578": false}, "1.1059777208710153": {"3.548105315019394": false, "3.6059101012223125": false, "3.7728195297940323": false, "4.881077149240405": false}, "3.460027174762763": {"4.578399834661159": false, "4.622066521779834": false, "4.681338671145914": false, "4.805759284172403": false}, "1.5692350069948657": {"2.677391755199446": false, "4.318714079233654": false}, "1.8039781042536593": {"2.368138499024213": true, "3.5328123356929675": false}, "2.368138499024213": {"2.4439498578978003": true, "2.8707689926368425": false, "3.0553596367453757": true, "3.579207733296172": false}, "2.4439498578978003": {"2.853933198949305": true, "3.522023920285092": false}, "2.853933198949305": {"3.8912299209096823": false, "4.049341709219163": false, "4.969750888219265": false}, "3.0553596367453757": {"3.2197178301776654": true, "3.587308860929409": true, "3.890412098877804": false, "4.411134441601339": false, "4.507328086745075": false, "4.605153639252816": false}, "3.2197178301776654": {"3.8328173336065685": false, "4.3815248859995455": false}, "3.587308860929409": {"4.452317024354366": false}, "2.248209298294838": {"2.8674629212075056": true, "3.8689948923724957": false, "4.11562787796857": false, "4.164916473588119": false, "4.173537356469909": false, "4.215047557429487": false, "4.500527584436251": false}, "2.8674629212075056": {"3.5209127298982548": true}, "3.5209127298982548": {"4.395263126807089": false}, "3.6613685875205926": {"4.136221404276677": true, "4.820040311128146": false}, "4.136221404276677": {"4.269727354097138": true}, "4.269727354097138": {}, "4.017926338388645": {"4.939951875899513": false}, "4.678580808747876": {}}, {"1": {"0.15438531024406338": false, "0.6012080300557974": true, "1.5692350069948657": true, "1.8039781042536593": true, "1.8601032113401863": false, "2.248209298294838": true, "3.6613685875205926": true, "4.017926338388645": true, "4.678580808747876": true}, "0.6012080300557974": {"0.8072079279572177": true, "1.0021931466850718": true, "1.1059777208710153": true, "3.3208500221945068": false, "3.460027174762763": true, "3.612596681020749": false, "4.620545836972225": false}, "0.8072079279572177": {"0.8083036096636488": true, "1.489025245752687": false, "1.688949493364202": false, "3.0515786960742908": false, "3.053056474424691": false}, "0.8083036096636488": {"1.1476826151544048": false, "1.6747920077805454": false, "2.117095042646968": true, "2.177428392257466": true, "2.3703241262220045": false, "3.036348670585614": false, "3.5929484664661198": false, "4.706811303158679": false}, "2.117095042646968": {"3.2783539040267176": true, "3.576971637172915": true, "4.103936774892654": false, "4.138934754323617": false, "4.442190056783633": false}, "3.2783539040267176": {"3.567694636810174": false, "4.021070139114411": false}, "3.576971637172915": {}, "2.177428392257466": {"2.2563865457084535": false, "2.5395138616750006": true, "2.8618801729804586": false}, "2.5395138616750006": {"2.8491400771911453": true, "4.158487664300259": true, "4.5923126054172165": false}, "2.8491400771911453": {"3.2435989817729287": false, "3.2573337503387174": false, "3.610654155440974": false, "4.688300977706366": true, "4.829175010449133": false}, "4.688300977706366": {"4.957327103164111": true}, "4.957327103164111": {}, "4.158487664300259": {"4.50763294512385": false, "4.774870029158423": true}, "4.774870029158423": {}, "1.0021931466850718": {"2.492046262395359": false, "3.4716351315431693": false, "4.29699746428578": false}, "1.1059777208710153": {"3.548105315019394": false, "3.6059101012223125": false, "3.7728195297940323": false, "4.881077149240405": false}, "3.460027174762763": {"4.578399834661159": false, "4.622066521779834": false, "4.681338671145914": false, "4.805759284172403": false}, "1.5692350069948657": {"2.677391755199446": false, "4.318714079233654": false}, "1.8039781042536593": {"2.368138499024213": true, "3.5328123356929675": false}, "2.368138499024213": {"2.4439498578978003": true, "2.8707689926368425": false, "3.0553596367453757": true, "3.579207733296172": false}, "2.4439498578978003": {"2.853933198949305": true, "3.522023920285092": false}, "2.853933198949305": {"3.8912299209096823": false, "4.049341709219163": false, "4.969750888219265": false}, "3.0553596367453757": {"3.2197178301776654": true, "3.587308860929409": true, "3.890412098877804": false, "4.411134441601339": false, "4.507328086745075": false, "4.605153639252816": false}, "3.2197178301776654": {"3.8328173336065685": false, "4.3815248859995455": false}, "3.587308860929409": {"4.452317024354366": false}, "2.248209298294838": {"2.8674629212075056": true, "3.8689948923724957": false, "4.11562787796857": false, "4.164916473588119": false, "4.173537356469909": false, "4.215047557429487": false, "4.500527584436251": false}, "2.8674629212075056": {"3.5209127298982548": true}, "3.5209127298982548": {"4.395263126807089": false}, "3.6613685875205926": {"4.136221404276677": true, "4.820040311128146": false}, "4.136221404276677": {"4.269727354097138": true}, "4.269727354097138": {}, "4.017926338388645": {"4.939951875899513": false}, "4.678580808747876": {}}, {"1": {"0.15438531024406338": false, "0.6012080300557974": true, "1.5692350069948657": true, "1.8039781042536593": true, "1.8601032113401863": false, "2.248209298294838": true, "3.6613685875205926": true, "4.017926338388645": true, "4.678580808747876": true}, "0.6012080300557974": {"0.8072079279572177": true, "1.0021931466850718": true, "1.1059777208710153": true, "3.3208500221945068": false, "3.460027174762763": true, "3.612596681020749": false, "4.620545836972225": false}, "0.8072079279572177": {"0.8083036096636488": true, "1.489025245752687": false, "1.688949493364202": false, "3.0515786960742908": false, "3.053056474424691": false}, "0.8083036096636488": {"1.1476826151544048": false, "1.6747920077805454": false, "2.117095042646968": true, "2.177428392257466": true, "2.3703241262220045": false, "3.036348670585614": false, "3.5929484664661198": false, "4.706811303158679": false}, "2.117095042646968": {"3.2783539040267176": true, "3.576971637172915": true, "4.103936774892654": false, "4.138934754323617": false, "4.442190056783633": false}, "3.2783539040267176": {"3.567694636810174": false, "4.021070139114411": false}, "3.576971637172915": {}, "2.177428392257466": {"2.2563865457084535": false, "2.5395138616750006": true, "2.8618801729804586": false}, "2.5395138616750006": {"2.8491400771911453": true, "4.158487664300259": true, "4.5923126054172165": false}, "2.8491400771911453": {"3.2435989817729287": false, "3.2573337503387174": false, "3.610654155440974": false, "4.688300977706366": true, "4.829175010449133": false}, "4.688300977706366": {"4.957327103164111": true}, "4.957327103164111": {}, "4.158487664300259": {"4.50763294512385": false, "4.774870029158423": true}, "4.774870029158423": {}, "1.0021931466850718": {"2.492046262395359": false, "3.4716351315431693": false, "4.29699746428578": false}, "1.1059777208710153": {"3.548105315019394": false, "3.6059101012223125": false, "3.7728195297940323": false, "4.881077149240405": false}, "3.460027174762763": {"4.578399834661159": false, "4.622066521779834": false, "4.681338671145914": false, "4.805759284172403": false}, "1.5692350069948657": {"2.677391755199446": false, "4.318714079233654": false}, "1.8039781042536593": {"2.368138499024213": true, "3.5328123356929675": false}, "2.368138499024213": {"2.4439498578978003": true, "2.8707689926368425": false, "3.0553596367453757": true, "3.579207733296172": false}, "2.4439498578978003": {"2.853933198949305": true, "3.522023920285092": false}, "2.853933198949305": {"3.8912299209096823": false, "4.049341709219163": false, "4.969750888219265": false}, "3.0553596367453757": {"3.2197178301776654": true, "3.587308860929409": true, "3.890412098877804": false, "4.411134441601339": false, "4.507328086745075": false, "4.605153639252816": false}, "3.2197178301776654": {"3.8328173336065685": false, "4.3815248859995455": false}, "3.587308860929409": {"4.452317024354366": false}, "2.248209298294838": {"2.8674629212075056": true, "3.8689948923724957": false, "4.11562787796857": false, "4.164916473588119": false, "4.173537356469909": false, "4.215047557429487": false, "4.500527584436251": false}, "2.8674629212075056": {"3.5209127298982548": true}, "3.5209127298982548": {"4.395263126807089": false}, "3.6613685875205926": {"4.136221404276677": true, "4.820040311128146": false}, "4.136221404276677": {"4.269727354097138": true}, "4.269727354097138": {}, "4.017926338388645": {"4.939951875899513": false}, "4.678580808747876": {}}, {"1": {"0.15438531024406338": false, "0.6012080300557974": true, "1.5692350069948657": true, "1.8039781042536593": true, "1.8601032113401863": false, "2.248209298294838": true, "3.6613685875205926": true, "4.017926338388645": true, "4.678580808747876": true}, "0.6012080300557974": {"0.8072079279572177": true, "1.0021931466850718": true, "1.1059777208710153": true, "3.3208500221945068": false, "3.460027174762763": true, "3.612596681020749": false, "4.620545836972225": false}, "0.8072079279572177": {"0.8083036096636488": true, "1.489025245752687": false, "1.688949493364202": false, "3.0515786960742908": false, "3.053056474424691": false}, "0.8083036096636488": {"1.1476826151544048": false, "1.6747920077805454": false, "2.117095042646968": true, "2.177428392257466": true, "2.3703241262220045": false, "3.036348670585614": false, "3.5929484664661198": false, "4.706811303158679": false}, "2.117095042646968": {"3.2783539040267176": true, "3.576971637172915": true, "4.103936774892654": false, "4.138934754323617": false, "4.442190056783633": false}, "3.2783539040267176": {"3.567694636810174": false, "4.021070139114411": false}, "3.576971637172915": {}, "2.177428392257466": {"2.2563865457084535": false, "2.5395138616750006": true, "2.8618801729804586": false}, "2.5395138616750006": {"2.8491400771911453": true, "4.158487664300259": true, "4.5923126054172165": false}, "2.8491400771911453": {"3.2435989817729287": false, "3.2573337503387174": false, "3.610654155440974": false, "4.688300977706366": true, "4.829175010449133": false}, "4.688300977706366": {"4.957327103164111": true}, "4.957327103164111": {}, "4.158487664300259": {"4.50763294512385": false, "4.774870029158423": true}, "4.774870029158423": {}, "1.0021931466850718": {"2.492046262395359": false, "3.4716351315431693": false, "4.29699746428578": false}, "1.1059777208710153": {"3.548105315019394": false, "3.6059101012223125": false, "3.7728195297940323": false, "4.881077149240405": false}, "3.460027174762763": {"4.578399834661159": false, "4.622066521779834": false, "4.681338671145914": false, "4.805759284172403": false}, "1.5692350069948657": {"2.677391755199446": false, "4.318714079233654": false}, "1.8039781042536593": {"2.368138499024213": true, "3.5328123356929675": false}, "2.368138499024213": {"2.4439498578978003": true, "2.8707689926368425": false, "3.0553596367453757": true, "3.579207733296172": false}, "2.4439498578978003": {"2.853933198949305": true, "3.522023920285092": false}, "2.853933198949305": {"3.8912299209096823": false, "4.049341709219163": false, "4.969750888219265": false}, "3.0553596367453757": {"3.2197178301776654": true, "3.587308860929409": true, "3.890412098877804": false, "4.411134441601339": false, "4.507328086745075": false, "4.605153639252816": false}, "3.2197178301776654": {"3.8328173336065685": false, "4.3815248859995455": false}, "3.587308860929409": {"4.452317024354366": false}, "2.248209298294838": {"2.8674629212075056": true, "3.8689948923724957": false, "4.11562787796857": false, "4.164916473588119": false, "4.173537356469909": false, "4.215047557429487": false, "4.500527584436251": false}, "2.8674629212075056": {"3.5209127298982548": true}, "3.5209127298982548": {"4.395263126807089": false}, "3.6613685875205926": {"4.136221404276677": true, "4.820040311128146": false}, "4.136221404276677": {"4.269727354097138": true}, "4.269727354097138": {}, "4.017926338388645": {"4.939951875899513": false}, "4.678580808747876": {}}, {"1": {"0.15438531024406338": false, "0.6012080300557974": true, "1.5692350069948657": true, "1.8039781042536593": true, "1.8601032113401863": false, "2.248209298294838": true, "3.6613685875205926": true, "4.017926338388645": true, "4.678580808747876": true}, "0.6012080300557974": {"0.8072079279572177": true, "1.0021931466850718": true, "1.1059777208710153": true, "3.3208500221945068": false, "3.460027174762763": true, "3.612596681020749": false, "4.620545836972225": false}, "0.8072079279572177": {"0.8083036096636488": true, "1.489025245752687": false, "1.688949493364202": false, "3.0515786960742908": false, "3.053056474424691": false}, "0.8083036096636488": {"1.1476826151544048": false, "1.6747920077805454": false, "2.117095042646968": true, "2.177428392257466": true, "2.3703241262220045": false, "3.036348670585614": false, "3.5929484664661198": false, "4.706811303158679": false}, "2.117095042646968": {"3.2783539040267176": true, "3.576971637172915": true, "4.103936774892654": false, "4.138934754323617": false, "4.442190056783633": false}, "3.2783539040267176": {"3.567694636810174": false, "4.021070139114411": false}, "3.576971637172915": {}, "2.177428392257466": {"2.2563865457084535": false, "2.5395138616750006": true, "2.8618801729804586": false}, "2.5395138616750006": {"2.8491400771911453": true, "4.158487664300259": true, "4.5923126054172165": false}, "2.8491400771911453": {"3.2435989817729287": false, "3.2573337503387174": false, "3.610654155440974": false, "4.688300977706366": true, "4.829175010449133": false}, "4.688300977706366": {"4.957327103164111": true}, "4.957327103164111": {}, "4.158487664300259": {"4.50763294512385": false, "4.774870029158423": true}, "4.774870029158423": {}, "1.0021931466850718": {"2.492046262395359": false, "3.4716351315431693": false, "4.29699746428578": false}, "1.1059777208710153": {"3.548105315019394": false, "3.6059101012223125": false, "3.7728195297940323": false, "4.881077149240405": false}, "3.460027174762763": {"4.578399834661159": false, "4.622066521779834": false, "4.681338671145914": false, "4.805759284172403": false}, "1.5692350069948657": {"2.677391755199446": false, "4.318714079233654": false}, "1.8039781042536593": {"2.368138499024213": true, "3.5328123356929675": false}, "2.368138499024213": {"2.4439498578978003": true, "2.8707689926368425": false, "3.0553596367453757": true, "3.579207733296172": false}, "2.4439498578978003": {"2.853933198949305": true, "3.522023920285092": false}, "2.853933198949305": {"3.8912299209096823": false, "4.049341709219163": false, "4.969750888219265": false}, "3.0553596367453757": {"3.2197178301776654": true, "3.587308860929409": true, "3.890412098877804": false, "4.411134441601339": false, "4.507328086745075": false, "4.605153639252816": false}, "3.2197178301776654": {"3.8328173336065685": false, "4.3815248859995455": false}, "3.587308860929409": {"4.452317024354366": false}, "2.248209298294838": {"2.8674629212075056": true, "3.8689948923724957": false, "4.11562787796857": false, "4.164916473588119": false, "4.173537356469909": false, "4.215047557429487": false, "4.500527584436251": false}, "2.8674629212075056": {"3.5209127298982548": true}, "3.5209127298982548": {"4.395263126807089": false}, "3.6613685875205926": {"4.136221404276677": true, "4.820040311128146": false}, "4.136221404276677": {"4.269727354097138": true}, "4.269727354097138": {}, "4.017926338388645": {"4.939951875899513": false}, "4.678580808747876": {}}, {"1": {"0.15438531024406338": false, "0.6012080300557974": true, "1.5692350069948657": true, "1.8039781042536593": true, "1.8601032113401863": false, "2.248209298294838": true, "3.6613685875205926": true, "4.017926338388645": true, "4.678580808747876": true}, "0.6012080300557974": {"0.8072079279572177": true, "1.0021931466850718": true, "1.1059777208710153": true, "3.3208500221945068": false, "3.460027174762763": true, "3.612596681020749": false, "4.620545836972225": false}, "0.8072079279572177": {"0.8083036096636488": true, "1.489025245752687": false, "1.688949493364202": false, "3.0515786960742908": false, "3.053056474424691": false}, "0.8083036096636488": {"1.1476826151544048": false, "1.6747920077805454": false, "2.117095042646968": true, "2.177428392257466": true, "2.3703241262220045": false, "3.036348670585614": false, "3.5929484664661198": false, "4.706811303158679": false}, "2.117095042646968": {"3.2783539040267176": true, "3.576971637172915": true, "4.103936774892654": false, "4.138934754323617": false, "4.442190056783633": false}, "3.2783539040267176": {"3.567694636810174": false, "4.021070139114411": false}, "3.576971637172915": {}, "2.177428392257466": {"2.2563865457084535": false, "2.5395138616750006": true, "2.8618801729804586": false}, "2.5395138616750006": {"2.8491400771911453": true, "4.158487664300259": true, "4.5923126054172165": false}, "2.8491400771911453": {"3.2435989817729287": false, "3.2573337503387174": false, "3.610654155440974": false, "4.688300977706366": true, "4.829175010449133": false}, "4.688300977706366": {"4.957327103164111": true}, "4.957327103164111": {}, "4.158487664300259": {"4.50763294512385": false, "4.774870029158423": true}, "4.774870029158423": {}, "1.0021931466850718": {"2.492046262395359": false, "3.4716351315431693": false, "4.29699746428578": false}, "1.1059777208710153": {"3.548105315019394": false, "3.6059101012223125": false, "3.7728195297940323": false, "4.881077149240405": false}, "3.460027174762763": {"4.578399834661159": false, "4.622066521779834": false, "4.681338671145914": false, "4.805759284172403": false}, "1.5692350069948657": {"2.677391755199446": false, "4.318714079233654": false}, "1.8039781042536593": {"2.368138499024213": true, "3.5328123356929675": false}, "2.368138499024213": {"2.4439498578978003": true, "2.8707689926368425": false, "3.0553596367453757": true, "3.579207733296172": false}, "2.4439498578978003": {"2.853933198949305": true, "3.522023920285092": false}, "2.853933198949305": {"3.8912299209096823": false, "4.049341709219163": false, "4.969750888219265": false}, "3.0553596367453757": {"3.2197178301776654": true, "3.587308860929409": true, "3.890412098877804": false, "4.411134441601339": false, "4.507328086745075": false, "4.605153639252816": false}, "3.2197178301776654": {"3.8328173336065685": false, "4.3815248859995455": false}, "3.587308860929409": {"4.452317024354366": false}, "2.248209298294838": {"2.8674629212075056": true, "3.8689948923724957": false, "4.11562787796857": false, "4.164916473588119": false, "4.173537356469909": false, "4.215047557429487": false, "4.500527584436251": false}, "2.8674629212075056": {"3.5209127298982548": true}, "3.5209127298982548": {"4.395263126807089": false}, "3.6613685875205926": {"4.136221404276677": true, "4.820040311128146": false}, "4.136221404276677": {"4.269727354097138": true}, "4.269727354097138": {}, "4.017926338388645": {"4.939951875899513": false}, "4.678580808747876": {}}, {"1": {"0.15438531024406338": false, "0.6012080300557974": true, "1.5692350069948657": true, "1.8039781042536593": true, "1.8601032113401863": false, "2.248209298294838": true, "3.6613685875205926": true, "4.017926338388645": true, "4.678580808747876": true}, "0.6012080300557974": {"0.8072079279572177": true, "1.0021931466850718": true, "1.1059777208710153": true, "3.3208500221945068": false, "3.460027174762763": true, "3.612596681020749": false, "4.620545836972225": false}, "0.8072079279572177": {"0.8083036096636488": true, "1.489025245752687": false, "1.688949493364202": false, "3.0515786960742908": false, "3.053056474424691": false}, "0.8083036096636488": {"1.1476826151544048": false, "1.6747920077805454": false, "2.117095042646968": true, "2.177428392257466": true, "2.3703241262220045": false, "3.036348670585614": false, "3.5929484664661198": false, "4.706811303158679": false}, "2.117095042646968": {"3.2783539040267176": true, "3.576971637172915": true, "4.103936774892654": false, "4.138934754323617": false, "4.442190056783633": false}, "3.2783539040267176": {"3.567694636810174": false, "4.021070139114411": false}, "3.576971637172915": {}, "2.177428392257466": {"2.2563865457084535": false, "2.5395138616750006": true, "2.8618801729804586": false}, "2.5395138616750006": {"2.8491400771911453": true, "4.158487664300259": true, "4.5923126054172165": false}, "2.8491400771911453": {"3.2435989817729287": false, "3.2573337503387174": false, "3.610654155440974": false, "4.688300977706366": true, "4.829175010449133": false}, "4.688300977706366": {"4.957327103164111": true}, "4.957327103164111": {}, "4.158487664300259": {"4.50763294512385": false, "4.774870029158423": true}, "4.774870029158423": {}, "1.0021931466850718": {"2.492046262395359": false, "3.4716351315431693": false, "4.29699746428578": false}, "1.1059777208710153": {"3.548105315019394": false, "3.6059101012223125": false, "3.7728195297940323": false, "4.881077149240405": false}, "3.460027174762763": {"4.578399834661159": false, "4.622066521779834": false, "4.681338671145914": false, "4.805759284172403": false}, "1.5692350069948657": {"2.677391755199446": false, "4.318714079233654": false}, "1.8039781042536593": {"2.368138499024213": true, "3.5328123356929675": false}, "2.368138499024213": {"2.4439498578978003": true, "2.8707689926368425": false, "3.0553596367453757": true, "3.579207733296172": false}, "2.4439498578978003": {"2.853933198949305": true, "3.522023920285092": false}, "2.853933198949305": {"3.8912299209096823": false, "4.049341709219163": false, "4.969750888219265": false}, "3.0553596367453757": {"3.2197178301776654": true, "3.587308860929409": true, "3.890412098877804": false, "4.411134441601339": false, "4.507328086745075": false, "4.605153639252816": false}, "3.2197178301776654": {"3.8328173336065685": false, "4.3815248859995455": false}, "3.587308860929409": {"4.452317024354366": false}, "2.248209298294838": {"2.8674629212075056": true, "3.8689948923724957": false, "4.11562787796857": false, "4.164916473588119": false, "4.173537356469909": false, "4.215047557429487": false, "4.500527584436251": false}, "2.8674629212075056": {"3.5209127298982548": true}, "3.5209127298982548": {"4.395263126807089": false}, "3.6613685875205926": {"4.136221404276677": true, "4.820040311128146": false}, "4.136221404276677": {"4.269727354097138": true}, "4.269727354097138": {}, "4.017926338388645": {"4.939951875899513": false}, "4.678580808747876": {}}, {"1": {"0.15438531024406338": false, "0.6012080300557974": true, "1.5692350069948657": true, "1.8039781042536593": true, "1.8601032113401863": false, "2.248209298294838": true, "3.6613685875205926": true, "4.017926338388645": true, "4.678580808747876": true}, "0.6012080300557974": {"0.8072079279572177": true, "1.0021931466850718": true, "1.1059777208710153": true, "3.3208500221945068": false, "3.460027174762763": true, "3.612596681020749": false, "4.620545836972225": false}, "0.8072079279572177": {"0.8083036096636488": true, "1.489025245752687": false, "1.688949493364202": false, "3.0515786960742908": false, "3.053056474424691": false}, "0.8083036096636488": {"1.1476826151544048": false, "1.6747920077805454": false, "2.117095042646968": true, "2.177428392257466": true, "2.3703241262220045": false, "3.036348670585614": false, "3.5929484664661198": false, "4.706811303158679": false}, "2.117095042646968": {"3.2783539040267176": true, "3.576971637172915": true, "4.103936774892654": false, "4.138934754323617": false, "4.442190056783633": false}, "3.2783539040267176": {"3.567694636810174": false, "4.021070139114411": false}, "3.576971637172915": {}, "2.177428392257466": {"2.2563865457084535": false, "2.5395138616750006": true, "2.8618801729804586": false}, "2.5395138616750006": {"2.8491400771911453": true, "4.158487664300259": true, "4.5923126054172165": false}, "2.8491400771911453": {"3.2435989817729287": false, "3.2573337503387174": false, "3.610654155440974": false, "4.688300977706366": true, "4.829175010449133": false}, "4.688300977706366": {"4.957327103164111": true}, "4.957327103164111": {}, "4.158487664300259": {"4.50763294512385": false, "4.774870029158423": true}, "4.774870029158423": {}, "1.0021931466850718": {"2.492046262395359": false, "3.4716351315431693": false, "4.29699746428578": false}, "1.1059777208710153": {"3.548105315019394": false, "3.6059101012223125": false, "3.7728195297940323": false, "4.881077149240405": false}, "3.460027174762763": {"4.578399834661159": false, "4.622066521779834": false, "4.681338671145914": false, "4.805759284172403": false}, "1.5692350069948657": {"2.677391755199446": false, "4.318714079233654": false}, "1.8039781042536593": {"2.368138499024213": true, "3.5328123356929675": false}, "2.368138499024213": {"2.4439498578978003": true, "2.8707689926368425": false, "3.0553596367453757": true, "3.579207733296172": false}, "2.4439498578978003": {"2.853933198949305": true, "3.522023920285092": false}, "2.853933198949305": {"3.8912299209096823": false, "4.049341709219163": false, "4.969750888219265": false}, "3.0553596367453757": {"3.2197178301776654": true, "3.587308860929409": true, "3.890412098877804": false, "4.411134441601339": false, "4.507328086745075": false, "4.605153639252816": false}, "3.2197178301776654": {"3.8328173336065685": false, "4.3815248859995455": false}, "3.587308860929409": {"4.452317024354366": false}, "2.248209298294838": {"2.8674629212075056": true, "3.8689948923724957": false, "4.11562787796857": false, "4.164916473588119": false, "4.173537356469909": false, "4.215047557429487": false, "4.500527584436251": false}, "2.8674629212075056": {"3.5209127298982548": true}, "3.5209127298982548": {"4.395263126807089": false}, "3.6613685875205926": {"4.136221404276677": true, "4.820040311128146": false}, "4.136221404276677": {"4.269727354097138": true}, "4.269727354097138": {}, "4.017926338388645": {"4.939951875899513": false}, "4.678580808747876": {}}, {"1": {"0.15438531024406338": false, "0.6012080300557974": true, "1.5692350069948657": true, "1.8039781042536593": true, "1.8601032113401863": false, "2.248209298294838": true, "3.6613685875205926": true, "4.017926338388645": true, "4.678580808747876": true}, "0.6012080300557974": {"0.8072079279572177": true, "1.0021931466850718": true, "1.1059777208710153": true, "3.3208500221945068": false, "3.460027174762763": true, "3.612596681020749": false, "4.620545836972225": false}, "0.8072079279572177": {"0.8083036096636488": true, "1.489025245752687": false, "1.688949493364202": false, "3.0515786960742908": false, "3.053056474424691": false}, "0.8083036096636488": {"1.1476826151544048": false, "1.6747920077805454": false, "2.117095042646968": true, "2.177428392257466": true, "2.3703241262220045": false, "3.036348670585614": false, "3.5929484664661198": false, "4.706811303158679": false}, "2.117095042646968": {"3.2783539040267176": true, "3.576971637172915": true, "4.103936774892654": false, "4.138934754323617": false, "4.442190056783633": false}, "3.2783539040267176": {"3.567694636810174": false, "4.021070139114411": false}, "3.576971637172915": {}, "2.177428392257466": {"2.2563865457084535": false, "2.5395138616750006": true, "2.8618801729804586": false}, "2.5395138616750006": {"2.8491400771911453": true, "4.158487664300259": true, "4.5923126054172165": false}, "2.8491400771911453": {"3.2435989817729287": false, "3.2573337503387174": false, "3.610654155440974": false, "4.688300977706366": true, "4.829175010449133": false}, "4.688300977706366": {"4.957327103164111": true}, "4.957327103164111": {}, "4.158487664300259": {"4.50763294512385": false, "4.774870029158423": true}, "4.774870029158423": {}, "1.0021931466850718": {"2.492046262395359": false, "3.4716351315431693": false, "4.29699746428578": false}, "1.1059777208710153": {"3.548105315019394": false, "3.6059101012223125": false, "3.7728195297940323": false, "4.881077149240405": false}, "3.460027174762763": {"4.578399834661159": false, "4.622066521779834": false, "4.681338671145914": false, "4.805759284172403": false}, "1.5692350069948657": {"2.677391755199446": false, "4.318714079233654": false}, "1.8039781042536593": {"2.368138499024213": true, "3.5328123356929675": false}, "2.368138499024213": {"2.4439498578978003": true, "2.8707689926368425": false, "3.0553596367453757": true, "3.579207733296172": false}, "2.4439498578978003": {"2.853933198949305": true, "3.522023920285092": false}, "2.853933198949305": {"3.8912299209096823": false, "4.049341709219163": false, "4.969750888219265": false}, "3.0553596367453757": {"3.2197178301776654": true, "3.587308860929409": true, "3.890412098877804": false, "4.411134441601339": false, "4.507328086745075": false, "4.605153639252816": false}, "3.2197178301776654": {"3.8328173336065685": false, "4.3815248859995455": false}, "3.587308860929409": {"4.452317024354366": false}, "2.248209298294838": {"2.8674629212075056": true, "3.8689948923724957": false, "4.11562787796857": false, "4.164916473588119": false, "4.173537356469909": false, "4.215047557429487": false, "4.500527584436251": false}, "2.8674629212075056": {"3.5209127298982548": true}, "3.5209127298982548": {"4.395263126807089": false}, "3.6613685875205926": {"4.136221404276677": true, "4.820040311128146": false}, "4.136221404276677": {"4.269727354097138": true}, "4.269727354097138": {}, "4.017926338388645": {"4.939951875899513": false}, "4.678580808747876": {}}, {"1": {"0.15438531024406338": false, "0.6012080300557974": true, "1.5692350069948657": true, "1.8039781042536593": true, "1.8601032113401863": false, "2.248209298294838": true, "3.6613685875205926": true, "4.017926338388645": true, "4.678580808747876": true}, "0.6012080300557974": {"0.8072079279572177": true, "1.0021931466850718": true, "1.1059777208710153": true, "3.3208500221945068": false, "3.460027174762763": true, "3.612596681020749": false, "4.620545836972225": false}, "0.8072079279572177": {"0.8083036096636488": true, "1.489025245752687": false, "1.688949493364202": false, "3.0515786960742908": false, "3.053056474424691": false}, "0.8083036096636488": {"1.1476826151544048": false, "1.6747920077805454": false, "2.117095042646968": true, "2.177428392257466": true, "2.3703241262220045": false, "3.036348670585614": false, "3.5929484664661198": false, "4.706811303158679": false}, "2.117095042646968": {"3.2783539040267176": true, "3.576971637172915": true, "4.103936774892654": false, "4.138934754323617": false, "4.442190056783633": false}, "3.2783539040267176": {"3.567694636810174": false, "4.021070139114411": false}, "3.576971637172915": {}, "2.177428392257466": {"2.2563865457084535": false, "2.5395138616750006": true, "2.8618801729804586": false}, "2.5395138616750006": {"2.8491400771911453": true, "4.158487664300259": true, "4.5923126054172165": false}, "2.8491400771911453": {"3.2435989817729287": false, "3.2573337503387174": false, "3.610654155440974": false, "4.688300977706366": true, "4.829175010449133": false}, "4.688300977706366": {"4.957327103164111": true}, "4.957327103164111": {}, "4.158487664300259": {"4.50763294512385": false, "4.774870029158423": true}, "4.774870029158423": {}, "1.0021931466850718": {"2.492046262395359": false, "3.4716351315431693": false, "4.29699746428578": false}, "1.1059777208710153": {"3.548105315019394": false, "3.6059101012223125": false, "3.7728195297940323": false, "4.881077149240405": false}, "3.460027174762763": {"4.578399834661159": false, "4.622066521779834": false, "4.681338671145914": false, "4.805759284172403": false}, "1.5692350069948657": {"2.677391755199446": false, "4.318714079233654": false}, "1.8039781042536593": {"2.368138499024213": true, "3.5328123356929675": false}, "2.368138499024213": {"2.4439498578978003": true, "2.8707689926368425": false, "3.0553596367453757": true, "3.579207733296172": false}, "2.4439498578978003": {"2.853933198949305": true, "3.522023920285092": false}, "2.853933198949305": {"3.8912299209096823": false, "4.049341709219163": false, "4.969750888219265": false}, "3.0553596367453757": {"3.2197178301776654": true, "3.587308860929409": true, "3.890412098877804": false, "4.411134441601339": false, "4.507328086745075": false, "4.605153639252816": false}, "3.2197178301776654": {"3.8328173336065685": false, "4.3815248859995455": false}, "3.587308860929409": {"4.452317024354366": false}, "2.248209298294838": {"2.8674629212075056": true, "3.8689948923724957": false, "4.11562787796857": false, "4.164916473588119": false, "4.173537356469909": false, "4.215047557429487": false, "4.500527584436251": false}, "2.8674629212075056": {"3.5209127298982548": true}, "3.5209127298982548": {"4.395263126807089": false}, "3.6613685875205926": {"4.136221404276677": true, "4.820040311128146": false}, "4.136221404276677": {"4.269727354097138": true}, "4.269727354097138": {}, "4.017926338388645": {"4.939951875899513": false}, "4.678580808747876": {}}, {"1": {"0.15438531024406338": false, "0.6012080300557974": true, "1.5692350069948657": true, "1.8039781042536593": true, "1.8601032113401863": false, "2.248209298294838": true, "3.6613685875205926": true, "4.017926338388645": true, "4.678580808747876": true}, "0.6012080300557974": {"0.8072079279572177": true, "1.0021931466850718": true, "1.1059777208710153": true, "3.3208500221945068": false, "3.460027174762763": true, "3.612596681020749": false, "4.620545836972225": false}, "0.8072079279572177": {"0.8083036096636488": true, "1.489025245752687": false, "1.688949493364202": false, "3.0515786960742908": false, "3.053056474424691": false}, "0.8083036096636488": {"1.1476826151544048": false, "1.6747920077805454": false, "2.117095042646968": true, "2.177428392257466": true, "2.3703241262220045": false, "3.036348670585614": false, "3.5929484664661198": false, "4.706811303158679": false}, "2.117095042646968": {"3.2783539040267176": true, "3.576971637172915": true, "4.103936774892654": false, "4.138934754323617": false, "4.442190056783633": false}, "3.2783539040267176": {"3.567694636810174": false, "4.021070139114411": false}, "3.576971637172915": {}, "2.177428392257466": {"2.2563865457084535": false, "2.5395138616750006": true, "2.8618801729804586": false}, "2.5395138616750006": {"2.8491400771911453": true, "4.158487664300259": true, "4.5923126054172165": false}, "2.8491400771911453": {"3.2435989817729287": false, "3.2573337503387174": false, "3.610654155440974": false, "4.688300977706366": true, "4.829175010449133": false}, "4.688300977706366": {"4.957327103164111": true}, "4.957327103164111": {}, "4.158487664300259": {"4.50763294512385": false, "4.774870029158423": true}, "4.774870029158423": {}, "1.0021931466850718": {"2.492046262395359": false, "3.4716351315431693": false, "4.29699746428578": false}, "1.1059777208710153": {"3.548105315019394": false, "3.6059101012223125": false, "3.7728195297940323": false, "4.881077149240405": false}, "3.460027174762763": {"4.578399834661159": false, "4.622066521779834": false, "4.681338671145914": false, "4.805759284172403": false}, "1.5692350069948657": {"2.677391755199446": false, "4.318714079233654": false}, "1.8039781042536593": {"2.368138499024213": true, "3.5328123356929675": false}, "2.368138499024213": {"2.4439498578978003": true, "2.8707689926368425": false, "3.0553596367453757": true, "3.579207733296172": false}, "2.4439498578978003": {"2.853933198949305": true, "3.522023920285092": false}, "2.853933198949305": {"3.8912299209096823": false, "4.049341709219163": false, "4.969750888219265": false}, "3.0553596367453757": {"3.2197178301776654": true, "3.587308860929409": true, "3.890412098877804": false, "4.411134441601339": false, "4.507328086745075": false, "4.605153639252816": false}, "3.2197178301776654": {"3.8328173336065685": false, "4.3815248859995455": false}, "3.587308860929409": {"4.452317024354366": false}, "2.248209298294838": {"2.8674629212075056": true, "3.8689948923724957": false, "4.11562787796857": false, "4.164916473588119": false, "4.173537356469909": false, "4.215047557429487": false, "4.500527584436251": false}, "2.8674629212075056": {"3.5209127298982548": true}, "3.5209127298982548": {"4.395263126807089": false}, "3.6613685875205926": {"4.136221404276677": true, "4.820040311128146": false}, "4.136221404276677": {"4.269727354097138": true}, "4.269727354097138": {}, "4.017926338388645": {"4.939951875899513": false}, "4.678580808747876": {}}, {"1": {"0.15438531024406338": false, "0.6012080300557974": true, "1.5692350069948657": true, "1.8039781042536593": true, "1.8601032113401863": false, "2.248209298294838": true, "3.6613685875205926": true, "4.017926338388645": true, "4.678580808747876": true}, "0.6012080300557974": {"0.8072079279572177": true, "1.0021931466850718": true, "1.1059777208710153": true, "3.3208500221945068": false, "3.460027174762763": true, "3.612596681020749": false, "4.620545836972225": false}, "0.8072079279572177": {"0.8083036096636488": true, "1.489025245752687": false, "1.688949493364202": false, "3.0515786960742908": false, "3.053056474424691": false}, "0.8083036096636488": {"1.1476826151544048": false, "1.6747920077805454": false, "2.117095042646968": true, "2.177428392257466": true, "2.3703241262220045": false, "3.036348670585614": false, "3.5929484664661198": false, "4.706811303158679": false}, "2.117095042646968": {"3.2783539040267176": true, "3.576971637172915": true, "4.103936774892654": false, "4.138934754323617": false, "4.442190056783633": false}, "3.2783539040267176": {"3.567694636810174": false, "4.021070139114411": false}, "3.576971637172915": {}, "2.177428392257466": {"2.2563865457084535": false, "2.5395138616750006": true, "2.8618801729804586": false}, "2.5395138616750006": {"2.8491400771911453": true, "4.158487664300259": true, "4.5923126054172165": false}, "2.8491400771911453": {"3.2435989817729287": false, "3.2573337503387174": false, "3.610654155440974": false, "4.688300977706366": true, "4.829175010449133": false}, "4.688300977706366": {"4.957327103164111": true}, "4.957327103164111": {}, "4.158487664300259": {"4.50763294512385": false, "4.774870029158423": true}, "4.774870029158423": {}, "1.0021931466850718": {"2.492046262395359": false, "3.4716351315431693": false, "4.29699746428578": false}, "1.1059777208710153": {"3.548105315019394": false, "3.6059101012223125": false, "3.7728195297940323": false, "4.881077149240405": false}, "3.460027174762763": {"4.578399834661159": false, "4.622066521779834": false, "4.681338671145914": false, "4.805759284172403": false}, "1.5692350069948657": {"2.677391755199446": false, "4.318714079233654": false}, "1.8039781042536593": {"2.368138499024213": true, "3.5328123356929675": false}, "2.368138499024213": {"2.4439498578978003": true, "2.8707689926368425": false, "3.0553596367453757": true, "3.579207733296172": false}, "2.4439498578978003": {"2.853933198949305": true, "3.522023920285092": false}, "2.853933198949305": {"3.8912299209096823": false, "4.049341709219163": false, "4.969750888219265": false}, "3.0553596367453757": {"3.2197178301776654": true, "3.587308860929409": true, "3.890412098877804": false, "4.411134441601339": false, "4.507328086745075": false, "4.605153639252816": false}, "3.2197178301776654": {"3.8328173336065685": false, "4.3815248859995455": false}, "3.587308860929409": {"4.452317024354366": false}, "2.248209298294838": {"2.8674629212075056": true, "3.8689948923724957": false, "4.11562787796857": false, "4.164916473588119": false, "4.173537356469909": false, "4.215047557429487": false, "4.500527584436251": false}, "2.8674629212075056": {"3.5209127298982548": true}, "3.5209127298982548": {"4.395263126807089": false}, "3.6613685875205926": {"4.136221404276677": true, "4.820040311128146": false}, "4.136221404276677": {"4.269727354097138": true}, "4.269727354097138": {}, "4.017926338388645": {"4.939951875899513": false}, "4.678580808747876": {}}, {"1": {"0.15438531024406338": false, "0.6012080300557974": true, "1.5692350069948657": true, "1.8039781042536593": true, "1.8601032113401863": false, "2.248209298294838": true, "3.6613685875205926": true, "4.017926338388645": true, "4.678580808747876": true}, "0.6012080300557974": {"0.8072079279572177": true, "1.0021931466850718": true, "1.1059777208710153": true, "3.3208500221945068": false, "3.460027174762763": true, "3.612596681020749": false, "4.620545836972225": false}, "0.8072079279572177": {"0.8083036096636488": true, "1.489025245752687": false, "1.688949493364202": false, "3.0515786960742908": false, "3.053056474424691": false}, "0.8083036096636488": {"1.1476826151544048": false, "1.6747920077805454": false, "2.117095042646968": true, "2.177428392257466": true, "2.3703241262220045": false, "3.036348670585614": false, "3.5929484664661198": false, "4.706811303158679": false}, "2.117095042646968": {"3.2783539040267176": true, "3.576971637172915": true, "4.103936774892654": false, "4.138934754323617": false, "4.442190056783633": false}, "3.2783539040267176": {"3.567694636810174": false, "4.021070139114411": false}, "3.576971637172915": {}, "2.177428392257466": {"2.2563865457084535": false, "2.5395138616750006": true, "2.8618801729804586": false}, "2.5395138616750006": {"2.8491400771911453": true, "4.158487664300259": true, "4.5923126054172165": false}, "2.8491400771911453": {"3.2435989817729287": false, "3.2573337503387174": false, "3.610654155440974": false, "4.688300977706366": true, "4.829175010449133": false}, "4.688300977706366": {"4.957327103164111": true}, "4.957327103164111": {}, "4.158487664300259": {"4.50763294512385": false, "4.774870029158423": true}, "4.774870029158423": {}, "1.0021931466850718": {"2.492046262395359": false, "3.4716351315431693": false, "4.29699746428578": false}, "1.1059777208710153": {"3.548105315019394": false, "3.6059101012223125": false, "3.7728195297940323": false, "4.881077149240405": false}, "3.460027174762763": {"4.578399834661159": false, "4.622066521779834": false, "4.681338671145914": false, "4.805759284172403": false}, "1.5692350069948657": {"2.677391755199446": false, "4.318714079233654": false}, "1.8039781042536593": {"2.368138499024213": true, "3.5328123356929675": false}, "2.368138499024213": {"2.4439498578978003": true, "2.8707689926368425": false, "3.0553596367453757": true, "3.579207733296172": false}, "2.4439498578978003": {"2.853933198949305": true, "3.522023920285092": false}, "2.853933198949305": {"3.8912299209096823": false, "4.049341709219163": false, "4.969750888219265": false}, "3.0553596367453757": {"3.2197178301776654": true, "3.587308860929409": true, "3.890412098877804": false, "4.411134441601339": false, "4.507328086745075": false, "4.605153639252816": false}, "3.2197178301776654": {"3.8328173336065685": false, "4.3815248859995455": false}, "3.587308860929409": {"4.452317024354366": false}, "2.248209298294838": {"2.8674629212075056": true, "3.8689948923724957": false, "4.11562787796857": false, "4.164916473588119": false, "4.173537356469909": false, "4.215047557429487": false, "4.500527584436251": false}, "2.8674629212075056": {"3.5209127298982548": true}, "3.5209127298982548": {"4.395263126807089": false}, "3.6613685875205926": {"4.136221404276677": true, "4.820040311128146": false}, "4.136221404276677": {"4.269727354097138": true}, "4.269727354097138": {}, "4.017926338388645": {"4.939951875899513": false}, "4.678580808747876": {}}, {"1": {"0.15438531024406338": false, "0.6012080300557974": true, "1.5692350069948657": true, "1.8039781042536593": true, "1.8601032113401863": false, "2.248209298294838": true, "3.6613685875205926": true, "4.017926338388645": true, "4.678580808747876": true}, "0.6012080300557974": {"0.8072079279572177": true, "1.0021931466850718": true, "1.1059777208710153": true, "3.3208500221945068": false, "3.460027174762763": true, "3.612596681020749": false, "4.620545836972225": false}, "0.8072079279572177": {"0.8083036096636488": true, "1.489025245752687": false, "1.688949493364202": false, "3.0515786960742908": false, "3.053056474424691": false}, "0.8083036096636488": {"1.1476826151544048": false, "1.6747920077805454": false, "2.117095042646968": true, "2.177428392257466": true, "2.3703241262220045": false, "3.036348670585614": false, "3.5929484664661198": false, "4.706811303158679": false}, "2.117095042646968": {"3.2783539040267176": true, "3.576971637172915": true, "4.103936774892654": false, "4.138934754323617": false, "4.442190056783633": false}, "3.2783539040267176": {"3.567694636810174": false, "4.021070139114411": false}, "3.576971637172915": {}, "2.177428392257466": {"2.2563865457084535": false, "2.5395138616750006": true, "2.8618801729804586": false}, "2.5395138616750006": {"2.8491400771911453": true, "4.158487664300259": true, "4.5923126054172165": false}, "2.8491400771911453": {"3.2435989817729287": false, "3.2573337503387174": false, "3.610654155440974": false, "4.688300977706366": true, "4.829175010449133": false}, "4.688300977706366": {"4.957327103164111": true}, "4.957327103164111": {}, "4.158487664300259": {"4.50763294512385": false, "4.774870029158423": true}, "4.774870029158423": {}, "1.0021931466850718": {"2.492046262395359": false, "3.4716351315431693": false, "4.29699746428578": false}, "1.1059777208710153": {"3.548105315019394": false, "3.6059101012223125": false, "3.7728195297940323": false, "4.881077149240405": false}, "3.460027174762763": {"4.578399834661159": false, "4.622066521779834": false, "4.681338671145914": false, "4.805759284172403": false}, "1.5692350069948657": {"2.677391755199446": false, "4.318714079233654": false}, "1.8039781042536593": {"2.368138499024213": true, "3.5328123356929675": false}, "2.368138499024213": {"2.4439498578978003": true, "2.8707689926368425": false, "3.0553596367453757": true, "3.579207733296172": false}, "2.4439498578978003": {"2.853933198949305": true, "3.522023920285092": false}, "2.853933198949305": {"3.8912299209096823": false, "4.049341709219163": false, "4.969750888219265": false}, "3.0553596367453757": {"3.2197178301776654": true, "3.587308860929409": true, "3.890412098877804": false, "4.411134441601339": false, "4.507328086745075": false, "4.605153639252816": false}, "3.2197178301776654": {"3.8328173336065685": false, "4.3815248859995455": false}, "3.587308860929409": {"4.452317024354366": false}, "2.248209298294838": {"2.8674629212075056": true, "3.8689948923724957": false, "4.11562787796857": false, "4.164916473588119": false, "4.173537356469909": false, "4.215047557429487": false, "4.500527584436251": false}, "2.8674629212075056": {"3.5209127298982548": true}, "3.5209127298982548": {"4.395263126807089": false}, "3.6613685875205926": {"4.136221404276677": true, "4.820040311128146": false}, "4.136221404276677": {"4.269727354097138": true}, "4.269727354097138": {}, "4.017926338388645": {"4.939951875899513": false}, "4.678580808747876": {}}, {"1": {"0.15438531024406338": false, "0.6012080300557974": true, "1.5692350069948657": true, "1.8039781042536593": true, "1.8601032113401863": false, "2.248209298294838": true, "3.6613685875205926": true, "4.017926338388645": true, "4.678580808747876": true}, "0.6012080300557974": {"0.8072079279572177": true, "1.0021931466850718": true, "1.1059777208710153": true, "3.3208500221945068": false, "3.460027174762763": true, "3.612596681020749": false, "4.620545836972225": false}, "0.8072079279572177": {"0.8083036096636488": true, "1.489025245752687": false, "1.688949493364202": false, "3.0515786960742908": false, "3.053056474424691": false}, "0.8083036096636488": {"1.1476826151544048": false, "1.6747920077805454": false, "2.117095042646968": true, "2.177428392257466": true, "2.3703241262220045": false, "3.036348670585614": false, "3.5929484664661198": false, "4.706811303158679": false}, "2.117095042646968": {"3.2783539040267176": true, "3.576971637172915": true, "4.103936774892654": false, "4.138934754323617": false, "4.442190056783633": false}, "3.2783539040267176": {"3.567694636810174": false, "4.021070139114411": false}, "3.576971637172915": {}, "2.177428392257466": {"2.2563865457084535": false, "2.5395138616750006": true, "2.8618801729804586": false}, "2.5395138616750006": {"2.8491400771911453": true, "4.158487664300259": true, "4.5923126054172165": false}, "2.8491400771911453": {"3.2435989817729287": false, "3.2573337503387174": false, "3.610654155440974": false, "4.688300977706366": true, "4.829175010449133": false}, "4.688300977706366": {"4.957327103164111": true}, "4.957327103164111": {}, "4.158487664300259": {"4.50763294512385": false, "4.774870029158423": true}, "4.774870029158423": {}, "1.0021931466850718": {"2.492046262395359": false, "3.4716351315431693": false, "4.29699746428578": false}, "1.1059777208710153": {"3.548105315019394": false, "3.6059101012223125": false, "3.7728195297940323": false, "4.881077149240405": false}, "3.460027174762763": {"4.578399834661159": false, "4.622066521779834": false, "4.681338671145914": false, "4.805759284172403": false}, "1.5692350069948657": {"2.677391755199446": false, "4.318714079233654": false}, "1.8039781042536593": {"2.368138499024213": true, "3.5328123356929675": false}, "2.368138499024213": {"2.4439498578978003": true, "2.8707689926368425": false, "3.0553596367453757": true, "3.579207733296172": false}, "2.4439498578978003": {"2.853933198949305": true, "3.522023920285092": false}, "2.853933198949305": {"3.8912299209096823": false, "4.049341709219163": false, "4.969750888219265": false}, "3.0553596367453757": {"3.2197178301776654": true, "3.587308860929409": true, "3.890412098877804": false, "4.411134441601339": false, "4.507328086745075": false, "4.605153639252816": false}, "3.2197178301776654": {"3.8328173336065685": false, "4.3815248859995455": false}, "3.587308860929409": {"4.452317024354366": false}, "2.248209298294838": {"2.8674629212075056": true, "3.8689948923724957": false, "4.11562787796857": false, "4.164916473588119": false, "4.173537356469909": false, "4.215047557429487": false, "4.500527584436251": false}, "2.8674629212075056": {"3.5209127298982548": true}, "3.5209127298982548": {"4.395263126807089": false}, "3.6613685875205926": {"4.136221404276677": true, "4.820040311128146": false}, "4.136221404276677": {"4.269727354097138": true}, "4.269727354097138": {}, "4.017926338388645": {"4.939951875899513": false}, "4.678580808747876": {}}, {"1": {"2.528177335810386": false, "3.0330809794558213": true, "3.2853437089808675": true, "3.77209840246388": true, "3.841320555857364": true, "3.8732984715423546": true, "4.619349015379562": true}, "3.0330809794558213": {"3.041678193424381": false, "3.514597679116947": true, "4.754666259514982": false}, "3.514597679116947": {"3.8172391828714463": true, "3.9859171520840757": true, "4.474742974711757": true, "4.513537228688156": false}, "3.8172391828714463": {"3.9245596682082633": false, "4.364470885652262": false, "4.411430235455113": false, "4.5539596464466": false, "4.743741936214163": true}, "4.743741936214163": {}, "3.9859171520840757": {"4.427497192190248": false, "4.624309337537848": false}, "4.474742974711757": {}, "3.2853437089808675": {"3.3293323369238212": true, "3.348834603166671": false, "3.851648333285012": false, "4.429911485975629": false, "4.818376716154027": false, "4.961121749382396": false}, "3.3293323369238212": {"3.852740722756241": false, "4.795060924257662": false}, "3.77209840246388": {"3.810160310768001": false}, "3.841320555857364": {"4.080924408147103": true, "4.933962955904674": false}, "4.080924408147103": {"4.644903018166011": true, "4.9201269476167635": false}, "4.644903018166011": {"4.676200749915216": true, "4.963662206548366": false}, "4.676200749915216": {"4.9589794508768446": true}, "4.9589794508768446": {"4.963870686266384": false}, "3.8732984715423546": {"4.039605031252168": true, "4.293737348986778": true, "4.330299009842796": false, "4.686751150325241": true}, "4.039605031252168": {"4.065029099064692": false, "4.297065552741854": true, "4.781812198716385": false}, "4.297065552741854": {"4.839266008888607": false}, "4.293737348986778": {}, "4.686751150325241": {}, "4.619349015379562": {"4.889051157744508": true}, "4.889051157744508": {"4.982494782920992": false}}, {"1": {"2.528177335810386": false, "3.0330809794558213": true, "3.2853437089808675": true, "3.77209840246388": true, "3.841320555857364": true, "3.8732984715423546": true, "4.619349015379562": true}, "3.0330809794558213": {"3.041678193424381": false, "3.514597679116947": true, "4.754666259514982": false}, "3.514597679116947": {"3.8172391828714463": true, "3.9859171520840757": true, "4.474742974711757": true, "4.513537228688156": false}, "3.8172391828714463": {"3.9245596682082633": false, "4.364470885652262": false, "4.411430235455113": false, "4.5539596464466": false, "4.743741936214163": true}, "4.743741936214163": {}, "3.9859171520840757": {"4.427497192190248": false, "4.624309337537848": false}, "4.474742974711757": {}, "3.2853437089808675": {"3.3293323369238212": true, "3.348834603166671": false, "3.851648333285012": false, "4.429911485975629": false, "4.818376716154027": false, "4.961121749382396": false}, "3.3293323369238212": {"3.852740722756241": false, "4.795060924257662": false}, "3.77209840246388": {"3.810160310768001": false}, "3.841320555857364": {"4.080924408147103": true, "4.933962955904674": false}, "4.080924408147103": {"4.644903018166011": true, "4.9201269476167635": false}, "4.644903018166011": {"4.676200749915216": true, "4.963662206548366": false}, "4.676200749915216": {"4.9589794508768446": true}, "4.9589794508768446": {"4.963870686266384": false}, "3.8732984715423546": {"4.039605031252168": true, "4.293737348986778": true, "4.330299009842796": false, "4.686751150325241": true}, "4.039605031252168": {"4.065029099064692": false, "4.297065552741854": true, "4.781812198716385": false}, "4.297065552741854": {"4.839266008888607": false}, "4.293737348986778": {}, "4.686751150325241": {}, "4.619349015379562": {"4.889051157744508": true}, "4.889051157744508": {"4.982494782920992": false}}, {"1": {"2.528177335810386": false, "3.0330809794558213": true, "3.2853437089808675": true, "3.77209840246388": true, "3.841320555857364": true, "3.8732984715423546": true, "4.619349015379562": true}, "3.0330809794558213": {"3.041678193424381": false, "3.514597679116947": true, "4.754666259514982": false}, "3.514597679116947": {"3.8172391828714463": true, "3.9859171520840757": true, "4.474742974711757": true, "4.513537228688156": false}, "3.8172391828714463": {"3.9245596682082633": false, "4.364470885652262": false, "4.411430235455113": false, "4.5539596464466": false, "4.743741936214163": true}, "4.743741936214163": {}, "3.9859171520840757": {"4.427497192190248": false, "4.624309337537848": false}, "4.474742974711757": {}, "3.2853437089808675": {"3.3293323369238212": true, "3.348834603166671": false, "3.851648333285012": false, "4.429911485975629": false, "4.818376716154027": false, "4.961121749382396": false}, "3.3293323369238212": {"3.852740722756241": false, "4.795060924257662": false}, "3.77209840246388": {"3.810160310768001": false}, "3.841320555857364": {"4.080924408147103": true, "4.933962955904674": false}, "4.080924408147103": {"4.644903018166011": true, "4.9201269476167635": false}, "4.644903018166011": {"4.676200749915216": true, "4.963662206548366": false}, "4.676200749915216": {"4.9589794508768446": true}, "4.9589794508768446": {"4.963870686266384": false}, "3.8732984715423546": {"4.039605031252168": true, "4.293737348986778": true, "4.330299009842796": false, "4.686751150325241": true}, "4.039605031252168": {"4.065029099064692": false, "4.297065552741854": true, "4.781812198716385": false}, "4.297065552741854": {"4.839266008888607": false}, "4.293737348986778": {}, "4.686751150325241": {}, "4.619349015379562": {"4.889051157744508": true}, "4.889051157744508": {"4.982494782920992": false}}, {"1": {"2.528177335810386": false, "3.0330809794558213": true, "3.2853437089808675": true, "3.77209840246388": true, "3.841320555857364": true, "3.8732984715423546": true, "4.619349015379562": true}, "3.0330809794558213": {"3.041678193424381": false, "3.514597679116947": true, "4.754666259514982": false}, "3.514597679116947": {"3.8172391828714463": true, "3.9859171520840757": true, "4.474742974711757": true, "4.513537228688156": false}, "3.8172391828714463": {"3.9245596682082633": false, "4.364470885652262": false, "4.411430235455113": false, "4.5539596464466": false, "4.743741936214163": true}, "4.743741936214163": {}, "3.9859171520840757": {"4.427497192190248": false, "4.624309337537848": false}, "4.474742974711757": {}, "3.2853437089808675": {"3.3293323369238212": true, "3.348834603166671": false, "3.851648333285012": false, "4.429911485975629": false, "4.818376716154027": false, "4.961121749382396": false}, "3.3293323369238212": {"3.852740722756241": false, "4.795060924257662": false}, "3.77209840246388": {"3.810160310768001": false}, "3.841320555857364": {"4.080924408147103": true, "4.933962955904674": false}, "4.080924408147103": {"4.644903018166011": true, "4.9201269476167635": false}, "4.644903018166011": {"4.676200749915216": true, "4.963662206548366": false}, "4.676200749915216": {"4.9589794508768446": true}, "4.9589794508768446": {"4.963870686266384": false}, "3.8732984715423546": {"4.039605031252168": true, "4.293737348986778": true, "4.330299009842796": false, "4.686751150325241": true}, "4.039605031252168": {"4.065029099064692": false, "4.297065552741854": true, "4.781812198716385": false}, "4.297065552741854": {"4.839266008888607": false}, "4.293737348986778": {}, "4.686751150325241": {}, "4.619349015379562": {"4.889051157744508": true}, "4.889051157744508": {"4.982494782920992": false}}, {"1": {"2.528177335810386": false, "3.0330809794558213": true, "3.2853437089808675": true, "3.77209840246388": true, "3.841320555857364": true, "3.8732984715423546": true, "4.619349015379562": true}, "3.0330809794558213": {"3.041678193424381": false, "3.514597679116947": true, "4.754666259514982": false}, "3.514597679116947": {"3.8172391828714463": true, "3.9859171520840757": true, "4.474742974711757": true, "4.513537228688156": false}, "3.8172391828714463": {"3.9245596682082633": false, "4.364470885652262": false, "4.411430235455113": false, "4.5539596464466": false, "4.743741936214163": true}, "4.743741936214163": {}, "3.9859171520840757": {"4.427497192190248": false, "4.624309337537848": false}, "4.474742974711757": {}, "3.2853437089808675": {"3.3293323369238212": true, "3.348834603166671": false, "3.851648333285012": false, "4.429911485975629": false, "4.818376716154027": false, "4.961121749382396": false}, "3.3293323369238212": {"3.852740722756241": false, "4.795060924257662": false}, "3.77209840246388": {"3.810160310768001": false}, "3.841320555857364": {"4.080924408147103": true, "4.933962955904674": false}, "4.080924408147103": {"4.644903018166011": true, "4.9201269476167635": false}, "4.644903018166011": {"4.676200749915216": true, "4.963662206548366": false}, "4.676200749915216": {"4.9589794508768446": true}, "4.9589794508768446": {"4.963870686266384": false}, "3.8732984715423546": {"4.039605031252168": true, "4.293737348986778": true, "4.330299009842796": false, "4.686751150325241": true}, "4.039605031252168": {"4.065029099064692": false, "4.297065552741854": true, "4.781812198716385": false}, "4.297065552741854": {"4.839266008888607": false}, "4.293737348986778": {}, "4.686751150325241": {}, "4.619349015379562": {"4.889051157744508": true}, "4.889051157744508": {"4.982494782920992": false}}, {"1": {"2.528177335810386": false, "3.0330809794558213": true, "3.2853437089808675": true, "3.77209840246388": true, "3.841320555857364": true, "3.8732984715423546": true, "4.619349015379562": true}, "3.0330809794558213": {"3.041678193424381": false, "3.514597679116947": true, "4.754666259514982": false}, "3.514597679116947": {"3.8172391828714463": true, "3.9859171520840757": true, "4.474742974711757": true, "4.513537228688156": false}, "3.8172391828714463": {"3.9245596682082633": false, "4.364470885652262": false, "4.411430235455113": false, "4.5539596464466": false, "4.743741936214163": true}, "4.743741936214163": {}, "3.9859171520840757": {"4.427497192190248": false, "4.624309337537848": false}, "4.474742974711757": {}, "3.2853437089808675": {"3.3293323369238212": true, "3.348834603166671": false, "3.851648333285012": false, "4.429911485975629": false, "4.818376716154027": false, "4.961121749382396": false}, "3.3293323369238212": {"3.852740722756241": false, "4.795060924257662": false}, "3.77209840246388": {"3.810160310768001": false}, "3.841320555857364": {"4.080924408147103": true, "4.933962955904674": false}, "4.080924408147103": {"4.644903018166011": true, "4.9201269476167635": false}, "4.644903018166011": {"4.676200749915216": true, "4.963662206548366": false}, "4.676200749915216": {"4.9589794508768446": true}, "4.9589794508768446": {"4.963870686266384": false}, "3.8732984715423546": {"4.039605031252168": true, "4.293737348986778": true, "4.330299009842796": false, "4.686751150325241": true}, "4.039605031252168": {"4.065029099064692": false, "4.297065552741854": true, "4.781812198716385": false}, "4.297065552741854": {"4.839266008888607": false}, "4.293737348986778": {}, "4.686751150325241": {}, "4.619349015379562": {"4.889051157744508": true}, "4.889051157744508": {"4.982494782920992": false}}, {"1": {"2.528177335810386": false, "3.0330809794558213": true, "3.2853437089808675": true, "3.77209840246388": true, "3.841320555857364": true, "3.8732984715423546": true, "4.619349015379562": true}, "3.0330809794558213": {"3.041678193424381": false, "3.514597679116947": true, "4.754666259514982": false}, "3.514597679116947": {"3.8172391828714463": true, "3.9859171520840757": true, "4.474742974711757": true, "4.513537228688156": false}, "3.8172391828714463": {"3.9245596682082633": false, "4.364470885652262": false, "4.411430235455113": false, "4.5539596464466": false, "4.743741936214163": true}, "4.743741936214163": {}, "3.9859171520840757": {"4.427497192190248": false, "4.624309337537848": false}, "4.474742974711757": {}, "3.2853437089808675": {"3.3293323369238212": true, "3.348834603166671": false, "3.851648333285012": false, "4.429911485975629": false, "4.818376716154027": false, "4.961121749382396": false}, "3.3293323369238212": {"3.852740722756241": false, "4.795060924257662": false}, "3.77209840246388": {"3.810160310768001": false}, "3.841320555857364": {"4.080924408147103": true, "4.933962955904674": false}, "4.080924408147103": {"4.644903018166011": true, "4.9201269476167635": false}, "4.644903018166011": {"4.676200749915216": true, "4.963662206548366": false}, "4.676200749915216": {"4.9589794508768446": true}, "4.9589794508768446": {"4.963870686266384": false}, "3.8732984715423546": {"4.039605031252168": true, "4.293737348986778": true, "4.330299009842796": false, "4.686751150325241": true}, "4.039605031252168": {"4.065029099064692": false, "4.297065552741854": true, "4.781812198716385": false}, "4.297065552741854": {"4.839266008888607": false}, "4.293737348986778": {}, "4.686751150325241": {}, "4.619349015379562": {"4.889051157744508": true}, "4.889051157744508": {"4.982494782920992": false}}, {"1": {"2.528177335810386": false, "3.0330809794558213": true, "3.2853437089808675": true, "3.77209840246388": true, "3.841320555857364": true, "3.8732984715423546": true, "4.619349015379562": true}, "3.0330809794558213": {"3.041678193424381": false, "3.514597679116947": true, "4.754666259514982": false}, "3.514597679116947": {"3.8172391828714463": true, "3.9859171520840757": true, "4.474742974711757": true, "4.513537228688156": false}, "3.8172391828714463": {"3.9245596682082633": false, "4.364470885652262": false, "4.411430235455113": false, "4.5539596464466": false, "4.743741936214163": true}, "4.743741936214163": {}, "3.9859171520840757": {"4.427497192190248": false, "4.624309337537848": false}, "4.474742974711757": {}, "3.2853437089808675": {"3.3293323369238212": true, "3.348834603166671": false, "3.851648333285012": false, "4.429911485975629": false, "4.818376716154027": false, "4.961121749382396": false}, "3.3293323369238212": {"3.852740722756241": false, "4.795060924257662": false}, "3.77209840246388": {"3.810160310768001": false}, "3.841320555857364": {"4.080924408147103": true, "4.933962955904674": false}, "4.080924408147103": {"4.644903018166011": true, "4.9201269476167635": false}, "4.644903018166011": {"4.676200749915216": true, "4.963662206548366": false}, "4.676200749915216": {"4.9589794508768446": true}, "4.9589794508768446": {"4.963870686266384": false}, "3.8732984715423546": {"4.039605031252168": true, "4.293737348986778": true, "4.330299009842796": false, "4.686751150325241": true}, "4.039605031252168": {"4.065029099064692": false, "4.297065552741854": true, "4.781812198716385": false}, "4.297065552741854": {"4.839266008888607": false}, "4.293737348986778": {}, "4.686751150325241": {}, "4.619349015379562": {"4.889051157744508": true}, "4.889051157744508": {"4.982494782920992": false}}, {"1": {"2.528177335810386": false, "3.0330809794558213": true, "3.2853437089808675": true, "3.77209840246388": true, "3.841320555857364": true, "3.8732984715423546": true, "4.619349015379562": true}, "3.0330809794558213": {"3.041678193424381": false, "3.514597679116947": true, "4.754666259514982": false}, "3.514597679116947": {"3.8172391828714463": true, "3.9859171520840757": true, "4.474742974711757": true, "4.513537228688156": false}, "3.8172391828714463": {"3.9245596682082633": false, "4.364470885652262": false, "4.411430235455113": false, "4.5539596464466": false, "4.743741936214163": true}, "4.743741936214163": {}, "3.9859171520840757": {"4.427497192190248": false, "4.624309337537848": false}, "4.474742974711757": {}, "3.2853437089808675": {"3.3293323369238212": true, "3.348834603166671": false, "3.851648333285012": false, "4.429911485975629": false, "4.818376716154027": false, "4.961121749382396": false}, "3.3293323369238212": {"3.852740722756241": false, "4.795060924257662": false}, "3.77209840246388": {"3.810160310768001": false}, "3.841320555857364": {"4.080924408147103": true, "4.933962955904674": false}, "4.080924408147103": {"4.644903018166011": true, "4.9201269476167635": false}, "4.644903018166011": {"4.676200749915216": true, "4.963662206548366": false}, "4.676200749915216": {"4.9589794508768446": true}, "4.9589794508768446": {"4.963870686266384": false}, "3.8732984715423546": {"4.039605031252168": true, "4.293737348986778": true, "4.330299009842796": false, "4.686751150325241": true}, "4.039605031252168": {"4.065029099064692": false, "4.297065552741854": true, "4.781812198716385": false}, "4.297065552741854": {"4.839266008888607": false}, "4.293737348986778": {}, "4.686751150325241": {}, "4.619349015379562": {"4.889051157744508": true}, "4.889051157744508": {"4.982494782920992": false}}, {"1": {"2.528177335810386": false, "3.0330809794558213": true, "3.2853437089808675": true, "3.77209840246388": true, "3.841320555857364": true, "3.8732984715423546": true, "4.619349015379562": true}, "3.0330809794558213": {"3.041678193424381": false, "3.514597679116947": true, "4.754666259514982": false}, "3.514597679116947": {"3.8172391828714463": true, "3.9859171520840757": true, "4.474742974711757": true, "4.513537228688156": false}, "3.8172391828714463": {"3.9245596682082633": false, "4.364470885652262": false, "4.411430235455113": false, "4.5539596464466": false, "4.743741936214163": true}, "4.743741936214163": {}, "3.9859171520840757": {"4.427497192190248": false, "4.624309337537848": false}, "4.474742974711757": {}, "3.2853437089808675": {"3.3293323369238212": true, "3.348834603166671": false, "3.851648333285012": false, "4.429911485975629": false, "4.818376716154027": false, "4.961121749382396": false}, "3.3293323369238212": {"3.852740722756241": false, "4.795060924257662": false}, "3.77209840246388": {"3.810160310768001": false}, "3.841320555857364": {"4.080924408147103": true, "4.933962955904674": false}, "4.080924408147103": {"4.644903018166011": true, "4.9201269476167635": false}, "4.644903018166011": {"4.676200749915216": true, "4.963662206548366": false}, "4.676200749915216": {"4.9589794508768446": true}, "4.9589794508768446": {"4.963870686266384": false}, "3.8732984715423546": {"4.039605031252168": true, "4.293737348986778": true, "4.330299009842796": false, "4.686751150325241": true}, "4.039605031252168": {"4.065029099064692": false, "4.297065552741854": true, "4.781812198716385": false}, "4.297065552741854": {"4.839266008888607": false}, "4.293737348986778": {}, "4.686751150325241": {}, "4.619349015379562": {"4.889051157744508": true}, "4.889051157744508": {"4.982494782920992": false}}, {"1": {"2.528177335810386": false, "3.0330809794558213": true, "3.2853437089808675": true, "3.77209840246388": true, "3.841320555857364": true, "3.8732984715423546": true, "4.619349015379562": true}, "3.0330809794558213": {"3.041678193424381": false, "3.514597679116947": true, "4.754666259514982": false}, "3.514597679116947": {"3.8172391828714463": true, "3.9859171520840757": true, "4.474742974711757": true, "4.513537228688156": false}, "3.8172391828714463": {"3.9245596682082633": false, "4.364470885652262": false, "4.411430235455113": false, "4.5539596464466": false, "4.743741936214163": true}, "4.743741936214163": {}, "3.9859171520840757": {"4.427497192190248": false, "4.624309337537848": false}, "4.474742974711757": {}, "3.2853437089808675": {"3.3293323369238212": true, "3.348834603166671": false, "3.851648333285012": false, "4.429911485975629": false, "4.818376716154027": false, "4.961121749382396": false}, "3.3293323369238212": {"3.852740722756241": false, "4.795060924257662": false}, "3.77209840246388": {"3.810160310768001": false}, "3.841320555857364": {"4.080924408147103": true, "4.933962955904674": false}, "4.080924408147103": {"4.644903018166011": true, "4.9201269476167635": false}, "4.644903018166011": {"4.676200749915216": true, "4.963662206548366": false}, "4.676200749915216": {"4.9589794508768446": true}, "4.9589794508768446": {"4.963870686266384": false}, "3.8732984715423546": {"4.039605031252168": true, "4.293737348986778": true, "4.330299009842796": false, "4.686751150325241": true}, "4.039605031252168": {"4.065029099064692": false, "4.297065552741854": true, "4.781812198716385": false}, "4.297065552741854": {"4.839266008888607": false}, "4.293737348986778": {}, "4.686751150325241": {}, "4.619349015379562": {"4.889051157744508": true}, "4.889051157744508": {"4.982494782920992": false}}, {"1": {"2.528177335810386": false, "3.0330809794558213": true, "3.2853437089808675": true, "3.77209840246388": true, "3.841320555857364": true, "3.8732984715423546": true, "4.619349015379562": true}, "3.0330809794558213": {"3.041678193424381": false, "3.514597679116947": true, "4.754666259514982": false}, "3.514597679116947": {"3.8172391828714463": true, "3.9859171520840757": true, "4.474742974711757": true, "4.513537228688156": false}, "3.8172391828714463": {"3.9245596682082633": false, "4.364470885652262": false, "4.411430235455113": false, "4.5539596464466": false, "4.743741936214163": true}, "4.743741936214163": {}, "3.9859171520840757": {"4.427497192190248": false, "4.624309337537848": false}, "4.474742974711757": {}, "3.2853437089808675": {"3.3293323369238212": true, "3.348834603166671": false, "3.851648333285012": false, "4.429911485975629": false, "4.818376716154027": false, "4.961121749382396": false}, "3.3293323369238212": {"3.852740722756241": false, "4.795060924257662": false}, "3.77209840246388": {"3.810160310768001": false}, "3.841320555857364": {"4.080924408147103": true, "4.933962955904674": false}, "4.080924408147103": {"4.644903018166011": true, "4.9201269476167635": false}, "4.644903018166011": {"4.676200749915216": true, "4.963662206548366": false}, "4.676200749915216": {"4.9589794508768446": true}, "4.9589794508768446": {"4.963870686266384": false}, "3.8732984715423546": {"4.039605031252168": true, "4.293737348986778": true, "4.330299009842796": false, "4.686751150325241": true}, "4.039605031252168": {"4.065029099064692": false, "4.297065552741854": true, "4.781812198716385": false}, "4.297065552741854": {"4.839266008888607": false}, "4.293737348986778": {}, "4.686751150325241": {}, "4.619349015379562": {"4.889051157744508": true}, "4.889051157744508": {"4.982494782920992": false}}, {"1": {"2.528177335810386": false, "3.0330809794558213": true, "3.2853437089808675": true, "3.77209840246388": true, "3.841320555857364": true, "3.8732984715423546": true, "4.619349015379562": true}, "3.0330809794558213": {"3.041678193424381": false, "3.514597679116947": true, "4.754666259514982": false}, "3.514597679116947": {"3.8172391828714463": true, "3.9859171520840757": true, "4.474742974711757": true, "4.513537228688156": false}, "3.8172391828714463": {"3.9245596682082633": false, "4.364470885652262": false, "4.411430235455113": false, "4.5539596464466": false, "4.743741936214163": true}, "4.743741936214163": {}, "3.9859171520840757": {"4.427497192190248": false, "4.624309337537848": false}, "4.474742974711757": {}, "3.2853437089808675": {"3.3293323369238212": true, "3.348834603166671": false, "3.851648333285012": false, "4.429911485975629": false, "4.818376716154027": false, "4.961121749382396": false}, "3.3293323369238212": {"3.852740722756241": false, "4.795060924257662": false}, "3.77209840246388": {"3.810160310768001": false}, "3.841320555857364": {"4.080924408147103": true, "4.933962955904674": false}, "4.080924408147103": {"4.644903018166011": true, "4.9201269476167635": false}, "4.644903018166011": {"4.676200749915216": true, "4.963662206548366": false}, "4.676200749915216": {"4.9589794508768446": true}, "4.9589794508768446": {"4.963870686266384": false}, "3.8732984715423546": {"4.039605031252168": true, "4.293737348986778": true, "4.330299009842796": false, "4.686751150325241": true}, "4.039605031252168": {"4.065029099064692": false, "4.297065552741854": true, "4.781812198716385": false}, "4.297065552741854": {"4.839266008888607": false}, "4.293737348986778": {}, "4.686751150325241": {}, "4.619349015379562": {"4.889051157744508": true}, "4.889051157744508": {"4.982494782920992": false}}, {"1": {"2.528177335810386": false, "3.0330809794558213": true, "3.2853437089808675": true, "3.77209840246388": true, "3.841320555857364": true, "3.8732984715423546": true, "4.619349015379562": true}, "3.0330809794558213": {"3.041678193424381": false, "3.514597679116947": true, "4.754666259514982": false}, "3.514597679116947": {"3.8172391828714463": true, "3.9859171520840757": true, "4.474742974711757": true, "4.513537228688156": false}, "3.8172391828714463": {"3.9245596682082633": false, "4.364470885652262": false, "4.411430235455113": false, "4.5539596464466": false, "4.743741936214163": true}, "4.743741936214163": {}, "3.9859171520840757": {"4.427497192190248": false, "4.624309337537848": false}, "4.474742974711757": {}, "3.2853437089808675": {"3.3293323369238212": true, "3.348834603166671": false, "3.851648333285012": false, "4.429911485975629": false, "4.818376716154027": false, "4.961121749382396": false}, "3.3293323369238212": {"3.852740722756241": false, "4.795060924257662": false}, "3.77209840246388": {"3.810160310768001": false}, "3.841320555857364": {"4.080924408147103": true, "4.933962955904674": false}, "4.080924408147103": {"4.644903018166011": true, "4.9201269476167635": false}, "4.644903018166011": {"4.676200749915216": true, "4.963662206548366": false}, "4.676200749915216": {"4.9589794508768446": true}, "4.9589794508768446": {"4.963870686266384": false}, "3.8732984715423546": {"4.039605031252168": true, "4.293737348986778": true, "4.330299009842796": false, "4.686751150325241": true}, "4.039605031252168": {"4.065029099064692": false, "4.297065552741854": true, "4.781812198716385": false}, "4.297065552741854": {"4.839266008888607": false}, "4.293737348986778": {}, "4.686751150325241": {}, "4.619349015379562": {"4.889051157744508": true}, "4.889051157744508": {"4.982494782920992": false}}, {"1": {"2.528177335810386": false, "3.0330809794558213": true, "3.2853437089808675": true, "3.77209840246388": true, "3.841320555857364": true, "3.8732984715423546": true, "4.619349015379562": true}, "3.0330809794558213": {"3.041678193424381": false, "3.514597679116947": true, "4.754666259514982": false}, "3.514597679116947": {"3.8172391828714463": true, "3.9859171520840757": true, "4.474742974711757": true, "4.513537228688156": false}, "3.8172391828714463": {"3.9245596682082633": false, "4.364470885652262": false, "4.411430235455113": false, "4.5539596464466": false, "4.743741936214163": true}, "4.743741936214163": {}, "3.9859171520840757": {"4.427497192190248": false, "4.624309337537848": false}, "4.474742974711757": {}, "3.2853437089808675": {"3.3293323369238212": true, "3.348834603166671": false, "3.851648333285012": false, "4.429911485975629": false, "4.818376716154027": false, "4.961121749382396": false}, "3.3293323369238212": {"3.852740722756241": false, "4.795060924257662": false}, "3.77209840246388": {"3.810160310768001": false}, "3.841320555857364": {"4.080924408147103": true, "4.933962955904674": false}, "4.080924408147103": {"4.644903018166011": true, "4.9201269476167635": false}, "4.644903018166011": {"4.676200749915216": true, "4.963662206548366": false}, "4.676200749915216": {"4.9589794508768446": true}, "4.9589794508768446": {"4.963870686266384": false}, "3.8732984715423546": {"4.039605031252168": true, "4.293737348986778": true, "4.330299009842796": false, "4.686751150325241": true}, "4.039605031252168": {"4.065029099064692": false, "4.297065552741854": true, "4.781812198716385": false}, "4.297065552741854": {"4.839266008888607": false}, "4.293737348986778": {}, "4.686751150325241": {}, "4.619349015379562": {"4.889051157744508": true}, "4.889051157744508": {"4.982494782920992": false}}, {"1": {"2.528177335810386": false, "3.0330809794558213": true, "3.2853437089808675": true, "3.77209840246388": true, "3.841320555857364": true, "3.8732984715423546": true, "4.619349015379562": true}, "3.0330809794558213": {"3.041678193424381": false, "3.514597679116947": true, "4.754666259514982": false}, "3.514597679116947": {"3.8172391828714463": true, "3.9859171520840757": true, "4.474742974711757": true, "4.513537228688156": false}, "3.8172391828714463": {"3.9245596682082633": false, "4.364470885652262": false, "4.411430235455113": false, "4.5539596464466": false, "4.743741936214163": true}, "4.743741936214163": {}, "3.9859171520840757": {"4.427497192190248": false, "4.624309337537848": false}, "4.474742974711757": {}, "3.2853437089808675": {"3.3293323369238212": true, "3.348834603166671": false, "3.851648333285012": false, "4.429911485975629": false, "4.818376716154027": false, "4.961121749382396": false}, "3.3293323369238212": {"3.852740722756241": false, "4.795060924257662": false}, "3.77209840246388": {"3.810160310768001": false}, "3.841320555857364": {"4.080924408147103": true, "4.933962955904674": false}, "4.080924408147103": {"4.644903018166011": true, "4.9201269476167635": false}, "4.644903018166011": {"4.676200749915216": true, "4.963662206548366": false}, "4.676200749915216": {"4.9589794508768446": true}, "4.9589794508768446": {"4.963870686266384": false}, "3.8732984715423546": {"4.039605031252168": true, "4.293737348986778": true, "4.330299009842796": false, "4.686751150325241": true}, "4.039605031252168": {"4.065029099064692": false, "4.297065552741854": true, "4.781812198716385": false}, "4.297065552741854": {"4.839266008888607": false}, "4.293737348986778": {}, "4.686751150325241": {}, "4.619349015379562": {"4.889051157744508": true}, "4.889051157744508": {"4.982494782920992": false}}, {"1": {"2.528177335810386": false, "3.0330809794558213": true, "3.2853437089808675": true, "3.77209840246388": true, "3.841320555857364": true, "3.8732984715423546": true, "4.619349015379562": true}, "3.0330809794558213": {"3.041678193424381": false, "3.514597679116947": true, "4.754666259514982": false}, "3.514597679116947": {"3.8172391828714463": true, "3.9859171520840757": true, "4.474742974711757": true, "4.513537228688156": false}, "3.8172391828714463": {"3.9245596682082633": false, "4.364470885652262": false, "4.411430235455113": false, "4.5539596464466": false, "4.743741936214163": true}, "4.743741936214163": {}, "3.9859171520840757": {"4.427497192190248": false, "4.624309337537848": false}, "4.474742974711757": {}, "3.2853437089808675": {"3.3293323369238212": true, "3.348834603166671": false, "3.851648333285012": false, "4.429911485975629": false, "4.818376716154027": false, "4.961121749382396": false}, "3.3293323369238212": {"3.852740722756241": false, "4.795060924257662": false}, "3.77209840246388": {"3.810160310768001": false}, "3.841320555857364": {"4.080924408147103": true, "4.933962955904674": false}, "4.080924408147103": {"4.644903018166011": true, "4.9201269476167635": false}, "4.644903018166011": {"4.676200749915216": true, "4.963662206548366": false}, "4.676200749915216": {"4.9589794508768446": true}, "4.9589794508768446": {"4.963870686266384": false}, "3.8732984715423546": {"4.039605031252168": true, "4.293737348986778": true, "4.330299009842796": false, "4.686751150325241": true}, "4.039605031252168": {"4.065029099064692": false, "4.297065552741854": true, "4.781812198716385": false}, "4.297065552741854": {"4.839266008888607": false}, "4.293737348986778": {}, "4.686751150325241": {}, "4.619349015379562": {"4.889051157744508": true}, "4.889051157744508": {"4.982494782920992": false}}, {"1": {"2.528177335810386": false, "3.0330809794558213": true, "3.2853437089808675": true, "3.77209840246388": true, "3.841320555857364": true, "3.8732984715423546": true, "4.619349015379562": true}, "3.0330809794558213": {"3.041678193424381": false, "3.514597679116947": true, "4.754666259514982": false}, "3.514597679116947": {"3.8172391828714463": true, "3.9859171520840757": true, "4.474742974711757": true, "4.513537228688156": false}, "3.8172391828714463": {"3.9245596682082633": false, "4.364470885652262": false, "4.411430235455113": false, "4.5539596464466": false, "4.743741936214163": true}, "4.743741936214163": {}, "3.9859171520840757": {"4.427497192190248": false, "4.624309337537848": false}, "4.474742974711757": {}, "3.2853437089808675": {"3.3293323369238212": true, "3.348834603166671": false, "3.851648333285012": false, "4.429911485975629": false, "4.818376716154027": false, "4.961121749382396": false}, "3.3293323369238212": {"3.852740722756241": false, "4.795060924257662": false}, "3.77209840246388": {"3.810160310768001": false}, "3.841320555857364": {"4.080924408147103": true, "4.933962955904674": false}, "4.080924408147103": {"4.644903018166011": true, "4.9201269476167635": false}, "4.644903018166011": {"4.676200749915216": true, "4.963662206548366": false}, "4.676200749915216": {"4.9589794508768446": true}, "4.9589794508768446": {"4.963870686266384": false}, "3.8732984715423546": {"4.039605031252168": true, "4.293737348986778": true, "4.330299009842796": false, "4.686751150325241": true}, "4.039605031252168": {"4.065029099064692": false, "4.297065552741854": true, "4.781812198716385": false}, "4.297065552741854": {"4.839266008888607": false}, "4.293737348986778": {}, "4.686751150325241": {}, "4.619349015379562": {"4.889051157744508": true}, "4.889051157744508": {"4.982494782920992": false}}, {"1": {"2.528177335810386": false, "3.0330809794558213": true, "3.2853437089808675": true, "3.77209840246388": true, "3.841320555857364": true, "3.8732984715423546": true, "4.619349015379562": true}, "3.0330809794558213": {"3.041678193424381": false, "3.514597679116947": true, "4.754666259514982": false}, "3.514597679116947": {"3.8172391828714463": true, "3.9859171520840757": true, "4.474742974711757": true, "4.513537228688156": false}, "3.8172391828714463": {"3.9245596682082633": false, "4.364470885652262": false, "4.411430235455113": false, "4.5539596464466": false, "4.743741936214163": true}, "4.743741936214163": {}, "3.9859171520840757": {"4.427497192190248": false, "4.624309337537848": false}, "4.474742974711757": {}, "3.2853437089808675": {"3.3293323369238212": true, "3.348834603166671": false, "3.851648333285012": false, "4.429911485975629": false, "4.818376716154027": false, "4.961121749382396": false}, "3.3293323369238212": {"3.852740722756241": false, "4.795060924257662": false}, "3.77209840246388": {"3.810160310768001": false}, "3.841320555857364": {"4.080924408147103": true, "4.933962955904674": false}, "4.080924408147103": {"4.644903018166011": true, "4.9201269476167635": false}, "4.644903018166011": {"4.676200749915216": true, "4.963662206548366": false}, "4.676200749915216": {"4.9589794508768446": true}, "4.9589794508768446": {"4.963870686266384": false}, "3.8732984715423546": {"4.039605031252168": true, "4.293737348986778": true, "4.330299009842796": false, "4.686751150325241": true}, "4.039605031252168": {"4.065029099064692": false, "4.297065552741854": true, "4.781812198716385": false}, "4.297065552741854": {"4.839266008888607": false}, "4.293737348986778": {}, "4.686751150325241": {}, "4.619349015379562": {"4.889051157744508": true}, "4.889051157744508": {"4.982494782920992": false}}, {"1": {"2.528177335810386": false, "3.0330809794558213": true, "3.2853437089808675": true, "3.77209840246388": true, "3.841320555857364": true, "3.8732984715423546": true, "4.619349015379562": true}, "3.0330809794558213": {"3.041678193424381": false, "3.514597679116947": true, "4.754666259514982": false}, "3.514597679116947": {"3.8172391828714463": true, "3.9859171520840757": true, "4.474742974711757": true, "4.513537228688156": false}, "3.8172391828714463": {"3.9245596682082633": false, "4.364470885652262": false, "4.411430235455113": false, "4.5539596464466": false, "4.743741936214163": true}, "4.743741936214163": {}, "3.9859171520840757": {"4.427497192190248": false, "4.624309337537848": false}, "4.474742974711757": {}, "3.2853437089808675": {"3.3293323369238212": true, "3.348834603166671": false, "3.851648333285012": false, "4.429911485975629": false, "4.818376716154027": false, "4.961121749382396": false}, "3.3293323369238212": {"3.852740722756241": false, "4.795060924257662": false}, "3.77209840246388": {"3.810160310768001": false}, "3.841320555857364": {"4.080924408147103": true, "4.933962955904674": false}, "4.080924408147103": {"4.644903018166011": true, "4.9201269476167635": false}, "4.644903018166011": {"4.676200749915216": true, "4.963662206548366": false}, "4.676200749915216": {"4.9589794508768446": true}, "4.9589794508768446": {"4.963870686266384": false}, "3.8732984715423546": {"4.039605031252168": true, "4.293737348986778": true, "4.330299009842796": false, "4.686751150325241": true}, "4.039605031252168": {"4.065029099064692": false, "4.297065552741854": true, "4.781812198716385": false}, "4.297065552741854": {"4.839266008888607": false}, "4.293737348986778": {}, "4.686751150325241": {}, "4.619349015379562": {"4.889051157744508": true}, "4.889051157744508": {"4.982494782920992": false}}, {"1": {"2.528177335810386": false, "3.0330809794558213": true, "3.2853437089808675": true, "3.77209840246388": true, "3.841320555857364": true, "3.8732984715423546": true, "4.619349015379562": true}, "3.0330809794558213": {"3.041678193424381": false, "3.514597679116947": true, "4.754666259514982": false}, "3.514597679116947": {"3.8172391828714463": true, "3.9859171520840757": true, "4.474742974711757": true, "4.513537228688156": false}, "3.8172391828714463": {"3.9245596682082633": false, "4.364470885652262": false, "4.411430235455113": false, "4.5539596464466": false, "4.743741936214163": true}, "4.743741936214163": {}, "3.9859171520840757": {"4.427497192190248": false, "4.624309337537848": false}, "4.474742974711757": {}, "3.2853437089808675": {"3.3293323369238212": true, "3.348834603166671": false, "3.851648333285012": false, "4.429911485975629": false, "4.818376716154027": false, "4.961121749382396": false}, "3.3293323369238212": {"3.852740722756241": false, "4.795060924257662": false}, "3.77209840246388": {"3.810160310768001": false}, "3.841320555857364": {"4.080924408147103": true, "4.933962955904674": false}, "4.080924408147103": {"4.644903018166011": true, "4.9201269476167635": false}, "4.644903018166011": {"4.676200749915216": true, "4.963662206548366": false}, "4.676200749915216": {"4.9589794508768446": true}, "4.9589794508768446": {"4.963870686266384": false}, "3.8732984715423546": {"4.039605031252168": true, "4.293737348986778": true, "4.330299009842796": false, "4.686751150325241": true}, "4.039605031252168": {"4.065029099064692": false, "4.297065552741854": true, "4.781812198716385": false}, "4.297065552741854": {"4.839266008888607": false}, "4.293737348986778": {}, "4.686751150325241": {}, "4.619349015379562": {"4.889051157744508": true}, "4.889051157744508": {"4.982494782920992": false}}, {"1": {"2.528177335810386": false, "3.0330809794558213": true, "3.2853437089808675": true, "3.77209840246388": true, "3.841320555857364": true, "3.8732984715423546": true, "4.619349015379562": true}, "3.0330809794558213": {"3.041678193424381": false, "3.514597679116947": true, "4.754666259514982": false}, "3.514597679116947": {"3.8172391828714463": true, "3.9859171520840757": true, "4.474742974711757": true, "4.513537228688156": false}, "3.8172391828714463": {"3.9245596682082633": false, "4.364470885652262": false, "4.411430235455113": false, "4.5539596464466": false, "4.743741936214163": true}, "4.743741936214163": {}, "3.9859171520840757": {"4.427497192190248": false, "4.624309337537848": false}, "4.474742974711757": {}, "3.2853437089808675": {"3.3293323369238212": true, "3.348834603166671": false, "3.851648333285012": false, "4.429911485975629": false, "4.818376716154027": false, "4.961121749382396": false}, "3.3293323369238212": {"3.852740722756241": false, "4.795060924257662": false}, "3.77209840246388": {"3.810160310768001": false}, "3.841320555857364": {"4.080924408147103": true, "4.933962955904674": false}, "4.080924408147103": {"4.644903018166011": true, "4.9201269476167635": false}, "4.644903018166011": {"4.676200749915216": true, "4.963662206548366": false}, "4.676200749915216": {"4.9589794508768446": true}, "4.9589794508768446": {"4.963870686266384": false}, "3.8732984715423546": {"4.039605031252168": true, "4.293737348986778": true, "4.330299009842796": false, "4.686751150325241": true}, "4.039605031252168": {"4.065029099064692": false, "4.297065552741854": true, "4.781812198716385": false}, "4.297065552741854": {"4.839266008888607": false}, "4.293737348986778": {}, "4.686751150325241": {}, "4.619349015379562": {"4.889051157744508": true}, "4.889051157744508": {"4.982494782920992": false}}, {"1": {"2.528177335810386": false, "3.0330809794558213": true, "3.2853437089808675": true, "3.77209840246388": true, "3.841320555857364": true, "3.8732984715423546": true, "4.619349015379562": true}, "3.0330809794558213": {"3.041678193424381": false, "3.514597679116947": true, "4.754666259514982": false}, "3.514597679116947": {"3.8172391828714463": true, "3.9859171520840757": true, "4.474742974711757": true, "4.513537228688156": false}, "3.8172391828714463": {"3.9245596682082633": false, "4.364470885652262": false, "4.411430235455113": false, "4.5539596464466": false, "4.743741936214163": true}, "4.743741936214163": {}, "3.9859171520840757": {"4.427497192190248": false, "4.624309337537848": false}, "4.474742974711757": {}, "3.2853437089808675": {"3.3293323369238212": true, "3.348834603166671": false, "3.851648333285012": false, "4.429911485975629": false, "4.818376716154027": false, "4.961121749382396": false}, "3.3293323369238212": {"3.852740722756241": false, "4.795060924257662": false}, "3.77209840246388": {"3.810160310768001": false}, "3.841320555857364": {"4.080924408147103": true, "4.933962955904674": false}, "4.080924408147103": {"4.644903018166011": true, "4.9201269476167635": false}, "4.644903018166011": {"4.676200749915216": true, "4.963662206548366": false}, "4.676200749915216": {"4.9589794508768446": true}, "4.9589794508768446": {"4.963870686266384": false}, "3.8732984715423546": {"4.039605031252168": true, "4.293737348986778": true, "4.330299009842796": false, "4.686751150325241": true}, "4.039605031252168": {"4.065029099064692": false, "4.297065552741854": true, "4.781812198716385": false}, "4.297065552741854": {"4.839266008888607": false}, "4.293737348986778": {}, "4.686751150325241": {}, "4.619349015379562": {"4.889051157744508": true}, "4.889051157744508": {"4.982494782920992": false}}, {"1": {"2.528177335810386": false, "3.0330809794558213": true, "3.2853437089808675": true, "3.77209840246388": true, "3.841320555857364": true, "3.8732984715423546": true, "4.619349015379562": true}, "3.0330809794558213": {"3.041678193424381": false, "3.514597679116947": true, "4.754666259514982": false}, "3.514597679116947": {"3.8172391828714463": true, "3.9859171520840757": true, "4.474742974711757": true, "4.513537228688156": false}, "3.8172391828714463": {"3.9245596682082633": false, "4.364470885652262": false, "4.411430235455113": false, "4.5539596464466": false, "4.743741936214163": true}, "4.743741936214163": {}, "3.9859171520840757": {"4.427497192190248": false, "4.624309337537848": false}, "4.474742974711757": {}, "3.2853437089808675": {"3.3293323369238212": true, "3.348834603166671": false, "3.851648333285012": false, "4.429911485975629": false, "4.818376716154027": false, "4.961121749382396": false}, "3.3293323369238212": {"3.852740722756241": false, "4.795060924257662": false}, "3.77209840246388": {"3.810160310768001": false}, "3.841320555857364": {"4.080924408147103": true, "4.933962955904674": false}, "4.080924408147103": {"4.644903018166011": true, "4.9201269476167635": false}, "4.644903018166011": {"4.676200749915216": true, "4.963662206548366": false}, "4.676200749915216": {"4.9589794508768446": true}, "4.9589794508768446": {"4.963870686266384": false}, "3.8732984715423546": {"4.039605031252168": true, "4.293737348986778": true, "4.330299009842796": false, "4.686751150325241": true}, "4.039605031252168": {"4.065029099064692": false, "4.297065552741854": true, "4.781812198716385": false}, "4.297065552741854": {"4.839266008888607": false}, "4.293737348986778": {}, "4.686751150325241": {}, "4.619349015379562": {"4.889051157744508": true}, "4.889051157744508": {"4.982494782920992": false}}, {"1": {"2.528177335810386": false, "3.0330809794558213": true, "3.2853437089808675": true, "3.77209840246388": true, "3.841320555857364": true, "3.8732984715423546": true, "4.619349015379562": true}, "3.0330809794558213": {"3.041678193424381": false, "3.514597679116947": true, "4.754666259514982": false}, "3.514597679116947": {"3.8172391828714463": true, "3.9859171520840757": true, "4.474742974711757": true, "4.513537228688156": false}, "3.8172391828714463": {"3.9245596682082633": false, "4.364470885652262": false, "4.411430235455113": false, "4.5539596464466": false, "4.743741936214163": true}, "4.743741936214163": {}, "3.9859171520840757": {"4.427497192190248": false, "4.624309337537848": false}, "4.474742974711757": {}, "3.2853437089808675": {"3.3293323369238212": true, "3.348834603166671": false, "3.851648333285012": false, "4.429911485975629": false, "4.818376716154027": false, "4.961121749382396": false}, "3.3293323369238212": {"3.852740722756241": false, "4.795060924257662": false}, "3.77209840246388": {"3.810160310768001": false}, "3.841320555857364": {"4.080924408147103": true, "4.933962955904674": false}, "4.080924408147103": {"4.644903018166011": true, "4.9201269476167635": false}, "4.644903018166011": {"4.676200749915216": true, "4.963662206548366": false}, "4.676200749915216": {"4.9589794508768446": true}, "4.9589794508768446": {"4.963870686266384": false}, "3.8732984715423546": {"4.039605031252168": true, "4.293737348986778": true, "4.330299009842796": false, "4.686751150325241": true}, "4.039605031252168": {"4.065029099064692": false, "4.297065552741854": true, "4.781812198716385": false}, "4.297065552741854": {"4.839266008888607": false}, "4.293737348986778": {}, "4.686751150325241": {}, "4.619349015379562": {"4.889051157744508": true}, "4.889051157744508": {"4.982494782920992": false}}, {"1": {"2.528177335810386": false, "3.0330809794558213": true, "3.2853437089808675": true, "3.77209840246388": true, "3.841320555857364": true, "3.8732984715423546": true, "4.619349015379562": true}, "3.0330809794558213": {"3.041678193424381": false, "3.514597679116947": true, "4.754666259514982": false}, "3.514597679116947": {"3.8172391828714463": true, "3.9859171520840757": true, "4.474742974711757": true, "4.513537228688156": false}, "3.8172391828714463": {"3.9245596682082633": false, "4.364470885652262": false, "4.411430235455113": false, "4.5539596464466": false, "4.743741936214163": true}, "4.743741936214163": {}, "3.9859171520840757": {"4.427497192190248": false, "4.624309337537848": false}, "4.474742974711757": {}, "3.2853437089808675": {"3.3293323369238212": true, "3.348834603166671": false, "3.851648333285012": false, "4.429911485975629": false, "4.818376716154027": false, "4.961121749382396": false}, "3.3293323369238212": {"3.852740722756241": false, "4.795060924257662": false}, "3.77209840246388": {"3.810160310768001": false}, "3.841320555857364": {"4.080924408147103": true, "4.933962955904674": false}, "4.080924408147103": {"4.644903018166011": true, "4.9201269476167635": false}, "4.644903018166011": {"4.676200749915216": true, "4.963662206548366": false}, "4.676200749915216": {"4.9589794508768446": true}, "4.9589794508768446": {"4.963870686266384": false}, "3.8732984715423546": {"4.039605031252168": true, "4.293737348986778": true, "4.330299009842796": false, "4.686751150325241": true}, "4.039605031252168": {"4.065029099064692": false, "4.297065552741854": true, "4.781812198716385": false}, "4.297065552741854": {"4.839266008888607": false}, "4.293737348986778": {}, "4.686751150325241": {}, "4.619349015379562": {"4.889051157744508": true}, "4.889051157744508": {"4.982494782920992": false}}, {"1": {"2.528177335810386": false, "3.0330809794558213": true, "3.2853437089808675": true, "3.77209840246388": true, "3.841320555857364": true, "3.8732984715423546": true, "4.619349015379562": true}, "3.0330809794558213": {"3.041678193424381": false, "3.514597679116947": true, "4.754666259514982": false}, "3.514597679116947": {"3.8172391828714463": true, "3.9859171520840757": true, "4.474742974711757": true, "4.513537228688156": false}, "3.8172391828714463": {"3.9245596682082633": false, "4.364470885652262": false, "4.411430235455113": false, "4.5539596464466": false, "4.743741936214163": true}, "4.743741936214163": {}, "3.9859171520840757": {"4.427497192190248": false, "4.624309337537848": false}, "4.474742974711757": {}, "3.2853437089808675": {"3.3293323369238212": true, "3.348834603166671": false, "3.851648333285012": false, "4.429911485975629": false, "4.818376716154027": false, "4.961121749382396": false}, "3.3293323369238212": {"3.852740722756241": false, "4.795060924257662": false}, "3.77209840246388": {"3.810160310768001": false}, "3.841320555857364": {"4.080924408147103": true, "4.933962955904674": false}, "4.080924408147103": {"4.644903018166011": true, "4.9201269476167635": false}, "4.644903018166011": {"4.676200749915216": true, "4.963662206548366": false}, "4.676200749915216": {"4.9589794508768446": true}, "4.9589794508768446": {"4.963870686266384": false}, "3.8732984715423546": {"4.039605031252168": true, "4.293737348986778": true, "4.330299009842796": false, "4.686751150325241": true}, "4.039605031252168": {"4.065029099064692": false, "4.297065552741854": true, "4.781812198716385": false}, "4.297065552741854": {"4.839266008888607": false}, "4.293737348986778": {}, "4.686751150325241": {}, "4.619349015379562": {"4.889051157744508": true}, "4.889051157744508": {"4.982494782920992": false}}, {"1": {"2.528177335810386": false, "3.0330809794558213": true, "3.2853437089808675": true, "3.77209840246388": true, "3.841320555857364": true, "3.8732984715423546": true, "4.619349015379562": true}, "3.0330809794558213": {"3.041678193424381": false, "3.514597679116947": true, "4.754666259514982": false}, "3.514597679116947": {"3.8172391828714463": true, "3.9859171520840757": true, "4.474742974711757": true, "4.513537228688156": false}, "3.8172391828714463": {"3.9245596682082633": false, "4.364470885652262": false, "4.411430235455113": false, "4.5539596464466": false, "4.743741936214163": true}, "4.743741936214163": {}, "3.9859171520840757": {"4.427497192190248": false, "4.624309337537848": false}, "4.474742974711757": {}, "3.2853437089808675": {"3.3293323369238212": true, "3.348834603166671": false, "3.851648333285012": false, "4.429911485975629": false, "4.818376716154027": false, "4.961121749382396": false}, "3.3293323369238212": {"3.852740722756241": false, "4.795060924257662": false}, "3.77209840246388": {"3.810160310768001": false}, "3.841320555857364": {"4.080924408147103": true, "4.933962955904674": false}, "4.080924408147103": {"4.644903018166011": true, "4.9201269476167635": false}, "4.644903018166011": {"4.676200749915216": true, "4.963662206548366": false}, "4.676200749915216": {"4.9589794508768446": true}, "4.9589794508768446": {"4.963870686266384": false}, "3.8732984715423546": {"4.039605031252168": true, "4.293737348986778": true, "4.330299009842796": false, "4.686751150325241": true}, "4.039605031252168": {"4.065029099064692": false, "4.297065552741854": true, "4.781812198716385": false}, "4.297065552741854": {"4.839266008888607": false}, "4.293737348986778": {}, "4.686751150325241": {}, "4.619349015379562": {"4.889051157744508": true}, "4.889051157744508": {"4.982494782920992": false}}, {"1": {"2.528177335810386": false, "3.0330809794558213": true, "3.2853437089808675": true, "3.77209840246388": true, "3.841320555857364": true, "3.8732984715423546": true, "4.619349015379562": true}, "3.0330809794558213": {"3.041678193424381": false, "3.514597679116947": true, "4.754666259514982": false}, "3.514597679116947": {"3.8172391828714463": true, "3.9859171520840757": true, "4.474742974711757": true, "4.513537228688156": false}, "3.8172391828714463": {"3.9245596682082633": false, "4.364470885652262": false, "4.411430235455113": false, "4.5539596464466": false, "4.743741936214163": true}, "4.743741936214163": {}, "3.9859171520840757": {"4.427497192190248": false, "4.624309337537848": false}, "4.474742974711757": {}, "3.2853437089808675": {"3.3293323369238212": true, "3.348834603166671": false, "3.851648333285012": false, "4.429911485975629": false, "4.818376716154027": false, "4.961121749382396": false}, "3.3293323369238212": {"3.852740722756241": false, "4.795060924257662": false}, "3.77209840246388": {"3.810160310768001": false}, "3.841320555857364": {"4.080924408147103": true, "4.933962955904674": false}, "4.080924408147103": {"4.644903018166011": true, "4.9201269476167635": false}, "4.644903018166011": {"4.676200749915216": true, "4.963662206548366": false}, "4.676200749915216": {"4.9589794508768446": true}, "4.9589794508768446": {"4.963870686266384": false}, "3.8732984715423546": {"4.039605031252168": true, "4.293737348986778": true, "4.330299009842796": false, "4.686751150325241": true}, "4.039605031252168": {"4.065029099064692": false, "4.297065552741854": true, "4.781812198716385": false}, "4.297065552741854": {"4.839266008888607": false}, "4.293737348986778": {}, "4.686751150325241": {}, "4.619349015379562": {"4.889051157744508": true}, "4.889051157744508": {"4.982494782920992": false}}, {"1": {"2.528177335810386": false, "3.0330809794558213": true, "3.2853437089808675": true, "3.77209840246388": true, "3.841320555857364": true, "3.8732984715423546": true, "4.619349015379562": true}, "3.0330809794558213": {"3.041678193424381": false, "3.514597679116947": true, "4.754666259514982": false}, "3.514597679116947": {"3.8172391828714463": true, "3.9859171520840757": true, "4.474742974711757": true, "4.513537228688156": false}, "3.8172391828714463": {"3.9245596682082633": false, "4.364470885652262": false, "4.411430235455113": false, "4.5539596464466": false, "4.743741936214163": true}, "4.743741936214163": {}, "3.9859171520840757": {"4.427497192190248": false, "4.624309337537848": false}, "4.474742974711757": {}, "3.2853437089808675": {"3.3293323369238212": true, "3.348834603166671": false, "3.851648333285012": false, "4.429911485975629": false, "4.818376716154027": false, "4.961121749382396": false}, "3.3293323369238212": {"3.852740722756241": false, "4.795060924257662": false}, "3.77209840246388": {"3.810160310768001": false}, "3.841320555857364": {"4.080924408147103": true, "4.933962955904674": false}, "4.080924408147103": {"4.644903018166011": true, "4.9201269476167635": false}, "4.644903018166011": {"4.676200749915216": true, "4.963662206548366": false}, "4.676200749915216": {"4.9589794508768446": true}, "4.9589794508768446": {"4.963870686266384": false}, "3.8732984715423546": {"4.039605031252168": true, "4.293737348986778": true, "4.330299009842796": false, "4.686751150325241": true}, "4.039605031252168": {"4.065029099064692": false, "4.297065552741854": true, "4.781812198716385": false}, "4.297065552741854": {"4.839266008888607": false}, "4.293737348986778": {}, "4.686751150325241": {}, "4.619349015379562": {"4.889051157744508": true}, "4.889051157744508": {"4.982494782920992": false}}, {"1": {"2.528177335810386": false, "3.0330809794558213": true, "3.2853437089808675": true, "3.77209840246388": true, "3.841320555857364": true, "3.8732984715423546": true, "4.619349015379562": true}, "3.0330809794558213": {"3.041678193424381": false, "3.514597679116947": true, "4.754666259514982": false}, "3.514597679116947": {"3.8172391828714463": true, "3.9859171520840757": true, "4.474742974711757": true, "4.513537228688156": false}, "3.8172391828714463": {"3.9245596682082633": false, "4.364470885652262": false, "4.411430235455113": false, "4.5539596464466": false, "4.743741936214163": true}, "4.743741936214163": {}, "3.9859171520840757": {"4.427497192190248": false, "4.624309337537848": false}, "4.474742974711757": {}, "3.2853437089808675": {"3.3293323369238212": true, "3.348834603166671": false, "3.851648333285012": false, "4.429911485975629": false, "4.818376716154027": false, "4.961121749382396": false}, "3.3293323369238212": {"3.852740722756241": false, "4.795060924257662": false}, "3.77209840246388": {"3.810160310768001": false}, "3.841320555857364": {"4.080924408147103": true, "4.933962955904674": false}, "4.080924408147103": {"4.644903018166011": true, "4.9201269476167635": false}, "4.644903018166011": {"4.676200749915216": true, "4.963662206548366": false}, "4.676200749915216": {"4.9589794508768446": true}, "4.9589794508768446": {"4.963870686266384": false}, "3.8732984715423546": {"4.039605031252168": true, "4.293737348986778": true, "4.330299009842796": false, "4.686751150325241": true}, "4.039605031252168": {"4.065029099064692": false, "4.297065552741854": true, "4.781812198716385": false}, "4.297065552741854": {"4.839266008888607": false}, "4.293737348986778": {}, "4.686751150325241": {}, "4.619349015379562": {"4.889051157744508": true}, "4.889051157744508": {"4.982494782920992": false}}, {"1": {"2.528177335810386": false, "3.0330809794558213": true, "3.2853437089808675": true, "3.77209840246388": true, "3.841320555857364": true, "3.8732984715423546": true, "4.619349015379562": true}, "3.0330809794558213": {"3.041678193424381": false, "3.514597679116947": true, "4.754666259514982": false}, "3.514597679116947": {"3.8172391828714463": true, "3.9859171520840757": true, "4.474742974711757": true, "4.513537228688156": false}, "3.8172391828714463": {"3.9245596682082633": false, "4.364470885652262": false, "4.411430235455113": false, "4.5539596464466": false, "4.743741936214163": true}, "4.743741936214163": {}, "3.9859171520840757": {"4.427497192190248": false, "4.624309337537848": false}, "4.474742974711757": {}, "3.2853437089808675": {"3.3293323369238212": true, "3.348834603166671": false, "3.851648333285012": false, "4.429911485975629": false, "4.818376716154027": false, "4.961121749382396": false}, "3.3293323369238212": {"3.852740722756241": false, "4.795060924257662": false}, "3.77209840246388": {"3.810160310768001": false}, "3.841320555857364": {"4.080924408147103": true, "4.933962955904674": false}, "4.080924408147103": {"4.644903018166011": true, "4.9201269476167635": false}, "4.644903018166011": {"4.676200749915216": true, "4.963662206548366": false}, "4.676200749915216": {"4.9589794508768446": true}, "4.9589794508768446": {"4.963870686266384": false}, "3.8732984715423546": {"4.039605031252168": true, "4.293737348986778": true, "4.330299009842796": false, "4.686751150325241": true}, "4.039605031252168": {"4.065029099064692": false, "4.297065552741854": true, "4.781812198716385": false}, "4.297065552741854": {"4.839266008888607": false}, "4.293737348986778": {}, "4.686751150325241": {}, "4.619349015379562": {"4.889051157744508": true}, "4.889051157744508": {"4.982494782920992": false}}, {"1": {"2.528177335810386": false, "3.0330809794558213": true, "3.2853437089808675": true, "3.77209840246388": true, "3.841320555857364": true, "3.8732984715423546": true, "4.619349015379562": true}, "3.0330809794558213": {"3.041678193424381": false, "3.514597679116947": true, "4.754666259514982": false}, "3.514597679116947": {"3.8172391828714463": true, "3.9859171520840757": true, "4.474742974711757": true, "4.513537228688156": false}, "3.8172391828714463": {"3.9245596682082633": false, "4.364470885652262": false, "4.411430235455113": false, "4.5539596464466": false, "4.743741936214163": true}, "4.743741936214163": {}, "3.9859171520840757": {"4.427497192190248": false, "4.624309337537848": false}, "4.474742974711757": {}, "3.2853437089808675": {"3.3293323369238212": true, "3.348834603166671": false, "3.851648333285012": false, "4.429911485975629": false, "4.818376716154027": false, "4.961121749382396": false}, "3.3293323369238212": {"3.852740722756241": false, "4.795060924257662": false}, "3.77209840246388": {"3.810160310768001": false}, "3.841320555857364": {"4.080924408147103": true, "4.933962955904674": false}, "4.080924408147103": {"4.644903018166011": true, "4.9201269476167635": false}, "4.644903018166011": {"4.676200749915216": true, "4.963662206548366": false}, "4.676200749915216": {"4.9589794508768446": true}, "4.9589794508768446": {"4.963870686266384": false}, "3.8732984715423546": {"4.039605031252168": true, "4.293737348986778": true, "4.330299009842796": false, "4.686751150325241": true}, "4.039605031252168": {"4.065029099064692": false, "4.297065552741854": true, "4.781812198716385": false}, "4.297065552741854": {"4.839266008888607": false}, "4.293737348986778": {}, "4.686751150325241": {}, "4.619349015379562": {"4.889051157744508": true}, "4.889051157744508": {"4.982494782920992": false}}, {"1": {"2.528177335810386": false, "3.0330809794558213": true, "3.2853437089808675": true, "3.77209840246388": true, "3.841320555857364": true, "3.8732984715423546": true, "4.619349015379562": true}, "3.0330809794558213": {"3.041678193424381": false, "3.514597679116947": true, "4.754666259514982": false}, "3.514597679116947": {"3.8172391828714463": true, "3.9859171520840757": true, "4.474742974711757": true, "4.513537228688156": false}, "3.8172391828714463": {"3.9245596682082633": false, "4.364470885652262": false, "4.411430235455113": false, "4.5539596464466": false, "4.743741936214163": true}, "4.743741936214163": {}, "3.9859171520840757": {"4.427497192190248": false, "4.624309337537848": false}, "4.474742974711757": {}, "3.2853437089808675": {"3.3293323369238212": true, "3.348834603166671": false, "3.851648333285012": false, "4.429911485975629": false, "4.818376716154027": false, "4.961121749382396": false}, "3.3293323369238212": {"3.852740722756241": false, "4.795060924257662": false}, "3.77209840246388": {"3.810160310768001": false}, "3.841320555857364": {"4.080924408147103": true, "4.933962955904674": false}, "4.080924408147103": {"4.644903018166011": true, "4.9201269476167635": false}, "4.644903018166011": {"4.676200749915216": true, "4.963662206548366": false}, "4.676200749915216": {"4.9589794508768446": true}, "4.9589794508768446": {"4.963870686266384": false}, "3.8732984715423546": {"4.039605031252168": true, "4.293737348986778": true, "4.330299009842796": false, "4.686751150325241": true}, "4.039605031252168": {"4.065029099064692": false, "4.297065552741854": true, "4.781812198716385": false}, "4.297065552741854": {"4.839266008888607": false}, "4.293737348986778": {}, "4.686751150325241": {}, "4.619349015379562": {"4.889051157744508": true}, "4.889051157744508": {"4.982494782920992": false}}, {"1": {"2.528177335810386": false, "3.0330809794558213": true, "3.2853437089808675": true, "3.77209840246388": true, "3.841320555857364": true, "3.8732984715423546": true, "4.619349015379562": true}, "3.0330809794558213": {"3.041678193424381": false, "3.514597679116947": true, "4.754666259514982": false}, "3.514597679116947": {"3.8172391828714463": true, "3.9859171520840757": true, "4.474742974711757": true, "4.513537228688156": false}, "3.8172391828714463": {"3.9245596682082633": false, "4.364470885652262": false, "4.411430235455113": false, "4.5539596464466": false, "4.743741936214163": true}, "4.743741936214163": {}, "3.9859171520840757": {"4.427497192190248": false, "4.624309337537848": false}, "4.474742974711757": {}, "3.2853437089808675": {"3.3293323369238212": true, "3.348834603166671": false, "3.851648333285012": false, "4.429911485975629": false, "4.818376716154027": false, "4.961121749382396": false}, "3.3293323369238212": {"3.852740722756241": false, "4.795060924257662": false}, "3.77209840246388": {"3.810160310768001": false}, "3.841320555857364": {"4.080924408147103": true, "4.933962955904674": false}, "4.080924408147103": {"4.644903018166011": true, "4.9201269476167635": false}, "4.644903018166011": {"4.676200749915216": true, "4.963662206548366": false}, "4.676200749915216": {"4.9589794508768446": true}, "4.9589794508768446": {"4.963870686266384": false}, "3.8732984715423546": {"4.039605031252168": true, "4.293737348986778": true, "4.330299009842796": false, "4.686751150325241": true}, "4.039605031252168": {"4.065029099064692": false, "4.297065552741854": true, "4.781812198716385": false}, "4.297065552741854": {"4.839266008888607": false}, "4.293737348986778": {}, "4.686751150325241": {}, "4.619349015379562": {"4.889051157744508": true}, "4.889051157744508": {"4.982494782920992": false}}, {"1": {"2.528177335810386": false, "3.0330809794558213": true, "3.2853437089808675": true, "3.77209840246388": true, "3.841320555857364": true, "3.8732984715423546": true, "4.619349015379562": true}, "3.0330809794558213": {"3.041678193424381": false, "3.514597679116947": true, "4.754666259514982": false}, "3.514597679116947": {"3.8172391828714463": true, "3.9859171520840757": true, "4.474742974711757": true, "4.513537228688156": false}, "3.8172391828714463": {"3.9245596682082633": false, "4.364470885652262": false, "4.411430235455113": false, "4.5539596464466": false, "4.743741936214163": true}, "4.743741936214163": {}, "3.9859171520840757": {"4.427497192190248": false, "4.624309337537848": false}, "4.474742974711757": {}, "3.2853437089808675": {"3.3293323369238212": true, "3.348834603166671": false, "3.851648333285012": false, "4.429911485975629": false, "4.818376716154027": false, "4.961121749382396": false}, "3.3293323369238212": {"3.852740722756241": false, "4.795060924257662": false}, "3.77209840246388": {"3.810160310768001": false}, "3.841320555857364": {"4.080924408147103": true, "4.933962955904674": false}, "4.080924408147103": {"4.644903018166011": true, "4.9201269476167635": false}, "4.644903018166011": {"4.676200749915216": true, "4.963662206548366": false}, "4.676200749915216": {"4.9589794508768446": true}, "4.9589794508768446": {"4.963870686266384": false}, "3.8732984715423546": {"4.039605031252168": true, "4.293737348986778": true, "4.330299009842796": false, "4.686751150325241": true}, "4.039605031252168": {"4.065029099064692": false, "4.297065552741854": true, "4.781812198716385": false}, "4.297065552741854": {"4.839266008888607": false}, "4.293737348986778": {}, "4.686751150325241": {}, "4.619349015379562": {"4.889051157744508": true}, "4.889051157744508": {"4.982494782920992": false}}, {"1": {"2.528177335810386": false, "3.0330809794558213": true, "3.2853437089808675": true, "3.77209840246388": true, "3.841320555857364": true, "3.8732984715423546": true, "4.619349015379562": true}, "3.0330809794558213": {"3.041678193424381": false, "3.514597679116947": true, "4.754666259514982": false}, "3.514597679116947": {"3.8172391828714463": true, "3.9859171520840757": true, "4.474742974711757": true, "4.513537228688156": false}, "3.8172391828714463": {"3.9245596682082633": false, "4.364470885652262": false, "4.411430235455113": false, "4.5539596464466": false, "4.743741936214163": true}, "4.743741936214163": {}, "3.9859171520840757": {"4.427497192190248": false, "4.624309337537848": false}, "4.474742974711757": {}, "3.2853437089808675": {"3.3293323369238212": true, "3.348834603166671": false, "3.851648333285012": false, "4.429911485975629": false, "4.818376716154027": false, "4.961121749382396": false}, "3.3293323369238212": {"3.852740722756241": false, "4.795060924257662": false}, "3.77209840246388": {"3.810160310768001": false}, "3.841320555857364": {"4.080924408147103": true, "4.933962955904674": false}, "4.080924408147103": {"4.644903018166011": true, "4.9201269476167635": false}, "4.644903018166011": {"4.676200749915216": true, "4.963662206548366": false}, "4.676200749915216": {"4.9589794508768446": true}, "4.9589794508768446": {"4.963870686266384": false}, "3.8732984715423546": {"4.039605031252168": true, "4.293737348986778": true, "4.330299009842796": false, "4.686751150325241": true}, "4.039605031252168": {"4.065029099064692": false, "4.297065552741854": true, "4.781812198716385": false}, "4.297065552741854": {"4.839266008888607": false}, "4.293737348986778": {}, "4.686751150325241": {}, "4.619349015379562": {"4.889051157744508": true}, "4.889051157744508": {"4.982494782920992": false}}, {"1": {"2.528177335810386": false, "3.0330809794558213": true, "3.2853437089808675": true, "3.77209840246388": true, "3.841320555857364": true, "3.8732984715423546": true, "4.619349015379562": true}, "3.0330809794558213": {"3.041678193424381": false, "3.514597679116947": true, "4.754666259514982": false}, "3.514597679116947": {"3.8172391828714463": true, "3.9859171520840757": true, "4.474742974711757": true, "4.513537228688156": false}, "3.8172391828714463": {"3.9245596682082633": false, "4.364470885652262": false, "4.411430235455113": false, "4.5539596464466": false, "4.743741936214163": true}, "4.743741936214163": {}, "3.9859171520840757": {"4.427497192190248": false, "4.624309337537848": false}, "4.474742974711757": {}, "3.2853437089808675": {"3.3293323369238212": true, "3.348834603166671": false, "3.851648333285012": false, "4.429911485975629": false, "4.818376716154027": false, "4.961121749382396": false}, "3.3293323369238212": {"3.852740722756241": false, "4.795060924257662": false}, "3.77209840246388": {"3.810160310768001": false}, "3.841320555857364": {"4.080924408147103": true, "4.933962955904674": false}, "4.080924408147103": {"4.644903018166011": true, "4.9201269476167635": false}, "4.644903018166011": {"4.676200749915216": true, "4.963662206548366": false}, "4.676200749915216": {"4.9589794508768446": true}, "4.9589794508768446": {"4.963870686266384": false}, "3.8732984715423546": {"4.039605031252168": true, "4.293737348986778": true, "4.330299009842796": false, "4.686751150325241": true}, "4.039605031252168": {"4.065029099064692": false, "4.297065552741854": true, "4.781812198716385": false}, "4.297065552741854": {"4.839266008888607": false}, "4.293737348986778": {}, "4.686751150325241": {}, "4.619349015379562": {"4.889051157744508": true}, "4.889051157744508": {"4.982494782920992": false}}, {"1": {"2.528177335810386": false, "3.0330809794558213": true, "3.2853437089808675": true, "3.77209840246388": true, "3.841320555857364": true, "3.8732984715423546": true, "4.619349015379562": true}, "3.0330809794558213": {"3.041678193424381": false, "3.514597679116947": true, "4.754666259514982": false}, "3.514597679116947": {"3.8172391828714463": true, "3.9859171520840757": true, "4.474742974711757": true, "4.513537228688156": false}, "3.8172391828714463": {"3.9245596682082633": false, "4.364470885652262": false, "4.411430235455113": false, "4.5539596464466": false, "4.743741936214163": true}, "4.743741936214163": {}, "3.9859171520840757": {"4.427497192190248": false, "4.624309337537848": false}, "4.474742974711757": {}, "3.2853437089808675": {"3.3293323369238212": true, "3.348834603166671": false, "3.851648333285012": false, "4.429911485975629": false, "4.818376716154027": false, "4.961121749382396": false}, "3.3293323369238212": {"3.852740722756241": false, "4.795060924257662": false}, "3.77209840246388": {"3.810160310768001": false}, "3.841320555857364": {"4.080924408147103": true, "4.933962955904674": false}, "4.080924408147103": {"4.644903018166011": true, "4.9201269476167635": false}, "4.644903018166011": {"4.676200749915216": true, "4.963662206548366": false}, "4.676200749915216": {"4.9589794508768446": true}, "4.9589794508768446": {"4.963870686266384": false}, "3.8732984715423546": {"4.039605031252168": true, "4.293737348986778": true, "4.330299009842796": false, "4.686751150325241": true}, "4.039605031252168": {"4.065029099064692": false, "4.297065552741854": true, "4.781812198716385": false}, "4.297065552741854": {"4.839266008888607": false}, "4.293737348986778": {}, "4.686751150325241": {}, "4.619349015379562": {"4.889051157744508": true}, "4.889051157744508": {"4.982494782920992": false}}, {"1": {"2.528177335810386": false, "3.0330809794558213": true, "3.2853437089808675": true, "3.77209840246388": true, "3.841320555857364": true, "3.8732984715423546": true, "4.619349015379562": true}, "3.0330809794558213": {"3.041678193424381": false, "3.514597679116947": true, "4.754666259514982": false}, "3.514597679116947": {"3.8172391828714463": true, "3.9859171520840757": true, "4.474742974711757": true, "4.513537228688156": false}, "3.8172391828714463": {"3.9245596682082633": false, "4.364470885652262": false, "4.411430235455113": false, "4.5539596464466": false, "4.743741936214163": true}, "4.743741936214163": {}, "3.9859171520840757": {"4.427497192190248": false, "4.624309337537848": false}, "4.474742974711757": {}, "3.2853437089808675": {"3.3293323369238212": true, "3.348834603166671": false, "3.851648333285012": false, "4.429911485975629": false, "4.818376716154027": false, "4.961121749382396": false}, "3.3293323369238212": {"3.852740722756241": false, "4.795060924257662": false}, "3.77209840246388": {"3.810160310768001": false}, "3.841320555857364": {"4.080924408147103": true, "4.933962955904674": false}, "4.080924408147103": {"4.644903018166011": true, "4.9201269476167635": false}, "4.644903018166011": {"4.676200749915216": true, "4.963662206548366": false}, "4.676200749915216": {"4.9589794508768446": true}, "4.9589794508768446": {"4.963870686266384": false}, "3.8732984715423546": {"4.039605031252168": true, "4.293737348986778": true, "4.330299009842796": false, "4.686751150325241": true}, "4.039605031252168": {"4.065029099064692": false, "4.297065552741854": true, "4.781812198716385": false}, "4.297065552741854": {"4.839266008888607": false}, "4.293737348986778": {}, "4.686751150325241": {}, "4.619349015379562": {"4.889051157744508": true}, "4.889051157744508": {"4.982494782920992": false}}, {"1": {"2.528177335810386": false, "3.0330809794558213": true, "3.2853437089808675": true, "3.77209840246388": true, "3.841320555857364": true, "3.8732984715423546": true, "4.619349015379562": true}, "3.0330809794558213": {"3.041678193424381": false, "3.514597679116947": true, "4.754666259514982": false}, "3.514597679116947": {"3.8172391828714463": true, "3.9859171520840757": true, "4.474742974711757": true, "4.513537228688156": false}, "3.8172391828714463": {"3.9245596682082633": false, "4.364470885652262": false, "4.411430235455113": false, "4.5539596464466": false, "4.743741936214163": true}, "4.743741936214163": {}, "3.9859171520840757": {"4.427497192190248": false, "4.624309337537848": false}, "4.474742974711757": {}, "3.2853437089808675": {"3.3293323369238212": true, "3.348834603166671": false, "3.851648333285012": false, "4.429911485975629": false, "4.818376716154027": false, "4.961121749382396": false}, "3.3293323369238212": {"3.852740722756241": false, "4.795060924257662": false}, "3.77209840246388": {"3.810160310768001": false}, "3.841320555857364": {"4.080924408147103": true, "4.933962955904674": false}, "4.080924408147103": {"4.644903018166011": true, "4.9201269476167635": false}, "4.644903018166011": {"4.676200749915216": true, "4.963662206548366": false}, "4.676200749915216": {"4.9589794508768446": true}, "4.9589794508768446": {"4.963870686266384": false}, "3.8732984715423546": {"4.039605031252168": true, "4.293737348986778": true, "4.330299009842796": false, "4.686751150325241": true}, "4.039605031252168": {"4.065029099064692": false, "4.297065552741854": true, "4.781812198716385": false}, "4.297065552741854": {"4.839266008888607": false}, "4.293737348986778": {}, "4.686751150325241": {}, "4.619349015379562": {"4.889051157744508": true}, "4.889051157744508": {"4.982494782920992": false}}, {"1": {"2.528177335810386": false, "3.0330809794558213": true, "3.2853437089808675": true, "3.77209840246388": true, "3.841320555857364": true, "3.8732984715423546": true, "4.619349015379562": true}, "3.0330809794558213": {"3.041678193424381": false, "3.514597679116947": true, "4.754666259514982": false}, "3.514597679116947": {"3.8172391828714463": true, "3.9859171520840757": true, "4.474742974711757": true, "4.513537228688156": false}, "3.8172391828714463": {"3.9245596682082633": false, "4.364470885652262": false, "4.411430235455113": false, "4.5539596464466": false, "4.743741936214163": true}, "4.743741936214163": {}, "3.9859171520840757": {"4.427497192190248": false, "4.624309337537848": false}, "4.474742974711757": {}, "3.2853437089808675": {"3.3293323369238212": true, "3.348834603166671": false, "3.851648333285012": false, "4.429911485975629": false, "4.818376716154027": false, "4.961121749382396": false}, "3.3293323369238212": {"3.852740722756241": false, "4.795060924257662": false}, "3.77209840246388": {"3.810160310768001": false}, "3.841320555857364": {"4.080924408147103": true, "4.933962955904674": false}, "4.080924408147103": {"4.644903018166011": true, "4.9201269476167635": false}, "4.644903018166011": {"4.676200749915216": true, "4.963662206548366": false}, "4.676200749915216": {"4.9589794508768446": true}, "4.9589794508768446": {"4.963870686266384": false}, "3.8732984715423546": {"4.039605031252168": true, "4.293737348986778": true, "4.330299009842796": false, "4.686751150325241": true}, "4.039605031252168": {"4.065029099064692": false, "4.297065552741854": true, "4.781812198716385": false}, "4.297065552741854": {"4.839266008888607": false}, "4.293737348986778": {}, "4.686751150325241": {}, "4.619349015379562": {"4.889051157744508": true}, "4.889051157744508": {"4.982494782920992": false}}, {"1": {"2.528177335810386": false, "3.0330809794558213": true, "3.2853437089808675": true, "3.77209840246388": true, "3.841320555857364": true, "3.8732984715423546": true, "4.619349015379562": true}, "3.0330809794558213": {"3.041678193424381": false, "3.514597679116947": true, "4.754666259514982": false}, "3.514597679116947": {"3.8172391828714463": true, "3.9859171520840757": true, "4.474742974711757": true, "4.513537228688156": false}, "3.8172391828714463": {"3.9245596682082633": false, "4.364470885652262": false, "4.411430235455113": false, "4.5539596464466": false, "4.743741936214163": true}, "4.743741936214163": {}, "3.9859171520840757": {"4.427497192190248": false, "4.624309337537848": false}, "4.474742974711757": {}, "3.2853437089808675": {"3.3293323369238212": true, "3.348834603166671": false, "3.851648333285012": false, "4.429911485975629": false, "4.818376716154027": false, "4.961121749382396": false}, "3.3293323369238212": {"3.852740722756241": false, "4.795060924257662": false}, "3.77209840246388": {"3.810160310768001": false}, "3.841320555857364": {"4.080924408147103": true, "4.933962955904674": false}, "4.080924408147103": {"4.644903018166011": true, "4.9201269476167635": false}, "4.644903018166011": {"4.676200749915216": true, "4.963662206548366": false}, "4.676200749915216": {"4.9589794508768446": true}, "4.9589794508768446": {"4.963870686266384": false}, "3.8732984715423546": {"4.039605031252168": true, "4.293737348986778": true, "4.330299009842796": false, "4.686751150325241": true}, "4.039605031252168": {"4.065029099064692": false, "4.297065552741854": true, "4.781812198716385": false}, "4.297065552741854": {"4.839266008888607": false}, "4.293737348986778": {}, "4.686751150325241": {}, "4.619349015379562": {"4.889051157744508": true}, "4.889051157744508": {"4.982494782920992": false}}, {"1": {"2.528177335810386": false, "3.0330809794558213": true, "3.2853437089808675": true, "3.77209840246388": true, "3.841320555857364": true, "3.8732984715423546": true, "4.619349015379562": true}, "3.0330809794558213": {"3.041678193424381": false, "3.514597679116947": true, "4.754666259514982": false}, "3.514597679116947": {"3.8172391828714463": true, "3.9859171520840757": true, "4.474742974711757": true, "4.513537228688156": false}, "3.8172391828714463": {"3.9245596682082633": false, "4.364470885652262": false, "4.411430235455113": false, "4.5539596464466": false, "4.743741936214163": true}, "4.743741936214163": {}, "3.9859171520840757": {"4.427497192190248": false, "4.624309337537848": false}, "4.474742974711757": {}, "3.2853437089808675": {"3.3293323369238212": true, "3.348834603166671": false, "3.851648333285012": false, "4.429911485975629": false, "4.818376716154027": false, "4.961121749382396": false}, "3.3293323369238212": {"3.852740722756241": false, "4.795060924257662": false}, "3.77209840246388": {"3.810160310768001": false}, "3.841320555857364": {"4.080924408147103": true, "4.933962955904674": false}, "4.080924408147103": {"4.644903018166011": true, "4.9201269476167635": false}, "4.644903018166011": {"4.676200749915216": true, "4.963662206548366": false}, "4.676200749915216": {"4.9589794508768446": true}, "4.9589794508768446": {"4.963870686266384": false}, "3.8732984715423546": {"4.039605031252168": true, "4.293737348986778": true, "4.330299009842796": false, "4.686751150325241": true}, "4.039605031252168": {"4.065029099064692": false, "4.297065552741854": true, "4.781812198716385": false}, "4.297065552741854": {"4.839266008888607": false}, "4.293737348986778": {}, "4.686751150325241": {}, "4.619349015379562": {"4.889051157744508": true}, "4.889051157744508": {"4.982494782920992": false}}, {"1": {"2.528177335810386": false, "3.0330809794558213": true, "3.2853437089808675": true, "3.77209840246388": true, "3.841320555857364": true, "3.8732984715423546": true, "4.619349015379562": true}, "3.0330809794558213": {"3.041678193424381": false, "3.514597679116947": true, "4.754666259514982": false}, "3.514597679116947": {"3.8172391828714463": true, "3.9859171520840757": true, "4.474742974711757": true, "4.513537228688156": false}, "3.8172391828714463": {"3.9245596682082633": false, "4.364470885652262": false, "4.411430235455113": false, "4.5539596464466": false, "4.743741936214163": true}, "4.743741936214163": {}, "3.9859171520840757": {"4.427497192190248": false, "4.624309337537848": false}, "4.474742974711757": {}, "3.2853437089808675": {"3.3293323369238212": true, "3.348834603166671": false, "3.851648333285012": false, "4.429911485975629": false, "4.818376716154027": false, "4.961121749382396": false}, "3.3293323369238212": {"3.852740722756241": false, "4.795060924257662": false}, "3.77209840246388": {"3.810160310768001": false}, "3.841320555857364": {"4.080924408147103": true, "4.933962955904674": false}, "4.080924408147103": {"4.644903018166011": true, "4.9201269476167635": false}, "4.644903018166011": {"4.676200749915216": true, "4.963662206548366": false}, "4.676200749915216": {"4.9589794508768446": true}, "4.9589794508768446": {"4.963870686266384": false}, "3.8732984715423546": {"4.039605031252168": true, "4.293737348986778": true, "4.330299009842796": false, "4.686751150325241": true}, "4.039605031252168": {"4.065029099064692": false, "4.297065552741854": true, "4.781812198716385": false}, "4.297065552741854": {"4.839266008888607": false}, "4.293737348986778": {}, "4.686751150325241": {}, "4.619349015379562": {"4.889051157744508": true}, "4.889051157744508": {"4.982494782920992": false}}, {"1": {"2.528177335810386": false, "3.0330809794558213": true, "3.2853437089808675": true, "3.77209840246388": true, "3.841320555857364": true, "3.8732984715423546": true, "4.619349015379562": true}, "3.0330809794558213": {"3.041678193424381": false, "3.514597679116947": true, "4.754666259514982": false}, "3.514597679116947": {"3.8172391828714463": true, "3.9859171520840757": true, "4.474742974711757": true, "4.513537228688156": false}, "3.8172391828714463": {"3.9245596682082633": false, "4.364470885652262": false, "4.411430235455113": false, "4.5539596464466": false, "4.743741936214163": true}, "4.743741936214163": {}, "3.9859171520840757": {"4.427497192190248": false, "4.624309337537848": false}, "4.474742974711757": {}, "3.2853437089808675": {"3.3293323369238212": true, "3.348834603166671": false, "3.851648333285012": false, "4.429911485975629": false, "4.818376716154027": false, "4.961121749382396": false}, "3.3293323369238212": {"3.852740722756241": false, "4.795060924257662": false}, "3.77209840246388": {"3.810160310768001": false}, "3.841320555857364": {"4.080924408147103": true, "4.933962955904674": false}, "4.080924408147103": {"4.644903018166011": true, "4.9201269476167635": false}, "4.644903018166011": {"4.676200749915216": true, "4.963662206548366": false}, "4.676200749915216": {"4.9589794508768446": true}, "4.9589794508768446": {"4.963870686266384": false}, "3.8732984715423546": {"4.039605031252168": true, "4.293737348986778": true, "4.330299009842796": false, "4.686751150325241": true}, "4.039605031252168": {"4.065029099064692": false, "4.297065552741854": true, "4.781812198716385": false}, "4.297065552741854": {"4.839266008888607": false}, "4.293737348986778": {}, "4.686751150325241": {}, "4.619349015379562": {"4.889051157744508": true}, "4.889051157744508": {"4.982494782920992": false}}, {"1": {"2.528177335810386": false, "3.0330809794558213": true, "3.2853437089808675": true, "3.77209840246388": true, "3.841320555857364": true, "3.8732984715423546": true, "4.619349015379562": true}, "3.0330809794558213": {"3.041678193424381": false, "3.514597679116947": true, "4.754666259514982": false}, "3.514597679116947": {"3.8172391828714463": true, "3.9859171520840757": true, "4.474742974711757": true, "4.513537228688156": false}, "3.8172391828714463": {"3.9245596682082633": false, "4.364470885652262": false, "4.411430235455113": false, "4.5539596464466": false, "4.743741936214163": true}, "4.743741936214163": {}, "3.9859171520840757": {"4.427497192190248": false, "4.624309337537848": false}, "4.474742974711757": {}, "3.2853437089808675": {"3.3293323369238212": true, "3.348834603166671": false, "3.851648333285012": false, "4.429911485975629": false, "4.818376716154027": false, "4.961121749382396": false}, "3.3293323369238212": {"3.852740722756241": false, "4.795060924257662": false}, "3.77209840246388": {"3.810160310768001": false}, "3.841320555857364": {"4.080924408147103": true, "4.933962955904674": false}, "4.080924408147103": {"4.644903018166011": true, "4.9201269476167635": false}, "4.644903018166011": {"4.676200749915216": true, "4.963662206548366": false}, "4.676200749915216": {"4.9589794508768446": true}, "4.9589794508768446": {"4.963870686266384": false}, "3.8732984715423546": {"4.039605031252168": true, "4.293737348986778": true, "4.330299009842796": false, "4.686751150325241": true}, "4.039605031252168": {"4.065029099064692": false, "4.297065552741854": true, "4.781812198716385": false}, "4.297065552741854": {"4.839266008888607": false}, "4.293737348986778": {}, "4.686751150325241": {}, "4.619349015379562": {"4.889051157744508": true}, "4.889051157744508": {"4.982494782920992": false}}, {"1": {"2.528177335810386": false, "3.0330809794558213": true, "3.2853437089808675": true, "3.77209840246388": true, "3.841320555857364": true, "3.8732984715423546": true, "4.619349015379562": true}, "3.0330809794558213": {"3.041678193424381": false, "3.514597679116947": true, "4.754666259514982": false}, "3.514597679116947": {"3.8172391828714463": true, "3.9859171520840757": true, "4.474742974711757": true, "4.513537228688156": false}, "3.8172391828714463": {"3.9245596682082633": false, "4.364470885652262": false, "4.411430235455113": false, "4.5539596464466": false, "4.743741936214163": true}, "4.743741936214163": {}, "3.9859171520840757": {"4.427497192190248": false, "4.624309337537848": false}, "4.474742974711757": {}, "3.2853437089808675": {"3.3293323369238212": true, "3.348834603166671": false, "3.851648333285012": false, "4.429911485975629": false, "4.818376716154027": false, "4.961121749382396": false}, "3.3293323369238212": {"3.852740722756241": false, "4.795060924257662": false}, "3.77209840246388": {"3.810160310768001": false}, "3.841320555857364": {"4.080924408147103": true, "4.933962955904674": false}, "4.080924408147103": {"4.644903018166011": true, "4.9201269476167635": false}, "4.644903018166011": {"4.676200749915216": true, "4.963662206548366": false}, "4.676200749915216": {"4.9589794508768446": true}, "4.9589794508768446": {"4.963870686266384": false}, "3.8732984715423546": {"4.039605031252168": true, "4.293737348986778": true, "4.330299009842796": false, "4.686751150325241": true}, "4.039605031252168": {"4.065029099064692": false, "4.297065552741854": true, "4.781812198716385": false}, "4.297065552741854": {"4.839266008888607": false}, "4.293737348986778": {}, "4.686751150325241": {}, "4.619349015379562": {"4.889051157744508": true}, "4.889051157744508": {"4.982494782920992": false}}, {"1": {"1.4313969467864534": false, "1.57642432015309": false, "1.862833732973678": false, "2.0301207726213826": true, "2.339020946529119": false, "2.5247389926368276": false, "3.4900258504105452": false, "3.7642023989608773": true, "4.603734489187504": true, "4.829203053325798": false}, "2.0301207726213826": {"2.129431432781357": true, "2.9670797663721937": false, "3.004103471766069": false, "3.1835486621946294": true, "3.4601733361752944": false, "4.596435179217099": false, "4.806113560827569": false}, "2.129431432781357": {"2.633496588167189": false, "4.359702121492351": true, "4.819019125307129": false}, "4.359702121492351": {}, "3.1835486621946294": {"3.3631757248128213": false, "4.538957041022918": true, "4.879509519749163": false}, "4.538957041022918": {}, "3.7642023989608773": {"4.355556259674693": false, "4.581143805117048": false, "4.759650224177936": true, "4.866670300870532": false}, "4.759650224177936": {}, "4.603734489187504": {"4.991691285852212": false, "4.996319666308555": true}, "4.996319666308555": {}}, {"1": {"1.4313969467864534": false, "1.57642432015309": false, "1.862833732973678": false, "2.0301207726213826": true, "2.339020946529119": false, "2.5247389926368276": false, "3.4900258504105452": false, "3.7642023989608773": true, "4.603734489187504": true, "4.829203053325798": false}, "2.0301207726213826": {"2.129431432781357": true, "2.9670797663721937": false, "3.004103471766069": false, "3.1835486621946294": true, "3.4601733361752944": false, "4.596435179217099": false, "4.806113560827569": false}, "2.129431432781357": {"2.633496588167189": false, "4.359702121492351": true, "4.819019125307129": false}, "4.359702121492351": {}, "3.1835486621946294": {"3.3631757248128213": false, "4.538957041022918": true, "4.879509519749163": false}, "4.538957041022918": {}, "3.7642023989608773": {"4.355556259674693": false, "4.581143805117048": false, "4.759650224177936": true, "4.866670300870532": false}, "4.759650224177936": {}, "4.603734489187504": {"4.991691285852212": false, "4.996319666308555": true}, "4.996319666308555": {}}, {"1": {"1.4313969467864534": false, "1.57642432015309": false, "1.862833732973678": false, "2.0301207726213826": true, "2.339020946529119": false, "2.5247389926368276": false, "3.4900258504105452": false, "3.7642023989608773": true, "4.603734489187504": true, "4.829203053325798": false}, "2.0301207726213826": {"2.129431432781357": true, "2.9670797663721937": false, "3.004103471766069": false, "3.1835486621946294": true, "3.4601733361752944": false, "4.596435179217099": false, "4.806113560827569": false}, "2.129431432781357": {"2.633496588167189": false, "4.359702121492351": true, "4.819019125307129": false}, "4.359702121492351": {}, "3.1835486621946294": {"3.3631757248128213": false, "4.538957041022918": true, "4.879509519749163": false}, "4.538957041022918": {}, "3.7642023989608773": {"4.355556259674693": false, "4.581143805117048": false, "4.759650224177936": true, "4.866670300870532": false}, "4.759650224177936": {}, "4.603734489187504": {"4.991691285852212": false, "4.996319666308555": true}, "4.996319666308555": {}}, {"1": {"1.4313969467864534": false, "1.57642432015309": false, "1.862833732973678": false, "2.0301207726213826": true, "2.339020946529119": false, "2.5247389926368276": false, "3.4900258504105452": false, "3.7642023989608773": true, "4.603734489187504": true, "4.829203053325798": false}, "2.0301207726213826": {"2.129431432781357": true, "2.9670797663721937": false, "3.004103471766069": false, "3.1835486621946294": true, "3.4601733361752944": false, "4.596435179217099": false, "4.806113560827569": false}, "2.129431432781357": {"2.633496588167189": false, "4.359702121492351": true, "4.819019125307129": false}, "4.359702121492351": {}, "3.1835486621946294": {"3.3631757248128213": false, "4.538957041022918": true, "4.879509519749163": false}, "4.538957041022918": {}, "3.7642023989608773": {"4.355556259674693": false, "4.581143805117048": false, "4.759650224177936": true, "4.866670300870532": false}, "4.759650224177936": {}, "4.603734489187504": {"4.991691285852212": false, "4.996319666308555": true}, "4.996319666308555": {}}, {"1": {"1.4313969467864534": false, "1.57642432015309": false, "1.862833732973678": false, "2.0301207726213826": true, "2.339020946529119": false, "2.5247389926368276": false, "3.4900258504105452": false, "3.7642023989608773": true, "4.603734489187504": true, "4.829203053325798": false}, "2.0301207726213826": {"2.129431432781357": true, "2.9670797663721937": false, "3.004103471766069": false, "3.1835486621946294": true, "3.4601733361752944": false, "4.596435179217099": false, "4.806113560827569": false}, "2.129431432781357": {"2.633496588167189": false, "4.359702121492351": true, "4.819019125307129": false}, "4.359702121492351": {}, "3.1835486621946294": {"3.3631757248128213": false, "4.538957041022918": true, "4.879509519749163": false}, "4.538957041022918": {}, "3.7642023989608773": {"4.355556259674693": false, "4.581143805117048": false, "4.759650224177936": true, "4.866670300870532": false}, "4.759650224177936": {}, "4.603734489187504": {"4.991691285852212": false, "4.996319666308555": true}, "4.996319666308555": {}}, {"1": {"1.4313969467864534": false, "1.57642432015309": false, "1.862833732973678": false, "2.0301207726213826": true, "2.339020946529119": false, "2.5247389926368276": false, "3.4900258504105452": false, "3.7642023989608773": true, "4.603734489187504": true, "4.829203053325798": false}, "2.0301207726213826": {"2.129431432781357": true, "2.9670797663721937": false, "3.004103471766069": false, "3.1835486621946294": true, "3.4601733361752944": false, "4.596435179217099": false, "4.806113560827569": false}, "2.129431432781357": {"2.633496588167189": false, "4.359702121492351": true, "4.819019125307129": false}, "4.359702121492351": {}, "3.1835486621946294": {"3.3631757248128213": false, "4.538957041022918": true, "4.879509519749163": false}, "4.538957041022918": {}, "3.7642023989608773": {"4.355556259674693": false, "4.581143805117048": false, "4.759650224177936": true, "4.866670300870532": false}, "4.759650224177936": {}, "4.603734489187504": {"4.991691285852212": false, "4.996319666308555": true}, "4.996319666308555": {}}, {"1": {"1.4313969467864534": false, "1.57642432015309": false, "1.862833732973678": false, "2.0301207726213826": true, "2.339020946529119": false, "2.5247389926368276": false, "3.4900258504105452": false, "3.7642023989608773": true, "4.603734489187504": true, "4.829203053325798": false}, "2.0301207726213826": {"2.129431432781357": true, "2.9670797663721937": false, "3.004103471766069": false, "3.1835486621946294": true, "3.4601733361752944": false, "4.596435179217099": false, "4.806113560827569": false}, "2.129431432781357": {"2.633496588167189": false, "4.359702121492351": true, "4.819019125307129": false}, "4.359702121492351": {}, "3.1835486621946294": {"3.3631757248128213": false, "4.538957041022918": true, "4.879509519749163": false}, "4.538957041022918": {}, "3.7642023989608773": {"4.355556259674693": false, "4.581143805117048": false, "4.759650224177936": true, "4.866670300870532": false}, "4.759650224177936": {}, "4.603734489187504": {"4.991691285852212": false, "4.996319666308555": true}, "4.996319666308555": {}}, {"1": {"1.4313969467864534": false, "1.57642432015309": false, "1.862833732973678": false, "2.0301207726213826": true, "2.339020946529119": false, "2.5247389926368276": false, "3.4900258504105452": false, "3.7642023989608773": true, "4.603734489187504": true, "4.829203053325798": false}, "2.0301207726213826": {"2.129431432781357": true, "2.9670797663721937": false, "3.004103471766069": false, "3.1835486621946294": true, "3.4601733361752944": false, "4.596435179217099": false, "4.806113560827569": false}, "2.129431432781357": {"2.633496588167189": false, "4.359702121492351": true, "4.819019125307129": false}, "4.359702121492351": {}, "3.1835486621946294": {"3.3631757248128213": false, "4.538957041022918": true, "4.879509519749163": false}, "4.538957041022918": {}, "3.7642023989608773": {"4.355556259674693": false, "4.581143805117048": false, "4.759650224177936": true, "4.866670300870532": false}, "4.759650224177936": {}, "4.603734489187504": {"4.991691285852212": false, "4.996319666308555": true}, "4.996319666308555": {}}, {"1": {"1.4313969467864534": false, "1.57642432015309": false, "1.862833732973678": false, "2.0301207726213826": true, "2.339020946529119": false, "2.5247389926368276": false, "3.4900258504105452": false, "3.7642023989608773": true, "4.603734489187504": true, "4.829203053325798": false}, "2.0301207726213826": {"2.129431432781357": true, "2.9670797663721937": false, "3.004103471766069": false, "3.1835486621946294": true, "3.4601733361752944": false, "4.596435179217099": false, "4.806113560827569": false}, "2.129431432781357": {"2.633496588167189": false, "4.359702121492351": true, "4.819019125307129": false}, "4.359702121492351": {}, "3.1835486621946294": {"3.3631757248128213": false, "4.538957041022918": true, "4.879509519749163": false}, "4.538957041022918": {}, "3.7642023989608773": {"4.355556259674693": false, "4.581143805117048": false, "4.759650224177936": true, "4.866670300870532": false}, "4.759650224177936": {}, "4.603734489187504": {"4.991691285852212": false, "4.996319666308555": true}, "4.996319666308555": {}}, {"1": {"1.4313969467864534": false, "1.57642432015309": false, "1.862833732973678": false, "2.0301207726213826": true, "2.339020946529119": false, "2.5247389926368276": false, "3.4900258504105452": false, "3.7642023989608773": true, "4.603734489187504": true, "4.829203053325798": false}, "2.0301207726213826": {"2.129431432781357": true, "2.9670797663721937": false, "3.004103471766069": false, "3.1835486621946294": true, "3.4601733361752944": false, "4.596435179217099": false, "4.806113560827569": false}, "2.129431432781357": {"2.633496588167189": false, "4.359702121492351": true, "4.819019125307129": false}, "4.359702121492351": {}, "3.1835486621946294": {"3.3631757248128213": false, "4.538957041022918": true, "4.879509519749163": false}, "4.538957041022918": {}, "3.7642023989608773": {"4.355556259674693": false, "4.581143805117048": false, "4.759650224177936": true, "4.866670300870532": false}, "4.759650224177936": {}, "4.603734489187504": {"4.991691285852212": false, "4.996319666308555": true}, "4.996319666308555": {}}, {"1": {"1.4313969467864534": false, "1.57642432015309": false, "1.862833732973678": false, "2.0301207726213826": true, "2.339020946529119": false, "2.5247389926368276": false, "3.4900258504105452": false, "3.7642023989608773": true, "4.603734489187504": true, "4.829203053325798": false}, "2.0301207726213826": {"2.129431432781357": true, "2.9670797663721937": false, "3.004103471766069": false, "3.1835486621946294": true, "3.4601733361752944": false, "4.596435179217099": false, "4.806113560827569": false}, "2.129431432781357": {"2.633496588167189": false, "4.359702121492351": true, "4.819019125307129": false}, "4.359702121492351": {}, "3.1835486621946294": {"3.3631757248128213": false, "4.538957041022918": true, "4.879509519749163": false}, "4.538957041022918": {}, "3.7642023989608773": {"4.355556259674693": false, "4.581143805117048": false, "4.759650224177936": true, "4.866670300870532": false}, "4.759650224177936": {}, "4.603734489187504": {"4.991691285852212": false, "4.996319666308555": true}, "4.996319666308555": {}}, {"1": {"1.4313969467864534": false, "1.57642432015309": false, "1.862833732973678": false, "2.0301207726213826": true, "2.339020946529119": false, "2.5247389926368276": false, "3.4900258504105452": false, "3.7642023989608773": true, "4.603734489187504": true, "4.829203053325798": false}, "2.0301207726213826": {"2.129431432781357": true, "2.9670797663721937": false, "3.004103471766069": false, "3.1835486621946294": true, "3.4601733361752944": false, "4.596435179217099": false, "4.806113560827569": false}, "2.129431432781357": {"2.633496588167189": false, "4.359702121492351": true, "4.819019125307129": false}, "4.359702121492351": {}, "3.1835486621946294": {"3.3631757248128213": false, "4.538957041022918": true, "4.879509519749163": false}, "4.538957041022918": {}, "3.7642023989608773": {"4.355556259674693": false, "4.581143805117048": false, "4.759650224177936": true, "4.866670300870532": false}, "4.759650224177936": {}, "4.603734489187504": {"4.991691285852212": false, "4.996319666308555": true}, "4.996319666308555": {}}, {"1": {"1.4313969467864534": false, "1.57642432015309": false, "1.862833732973678": false, "2.0301207726213826": true, "2.339020946529119": false, "2.5247389926368276": false, "3.4900258504105452": false, "3.7642023989608773": true, "4.603734489187504": true, "4.829203053325798": false}, "2.0301207726213826": {"2.129431432781357": true, "2.9670797663721937": false, "3.004103471766069": false, "3.1835486621946294": true, "3.4601733361752944": false, "4.596435179217099": false, "4.806113560827569": false}, "2.129431432781357": {"2.633496588167189": false, "4.359702121492351": true, "4.819019125307129": false}, "4.359702121492351": {}, "3.1835486621946294": {"3.3631757248128213": false, "4.538957041022918": true, "4.879509519749163": false}, "4.538957041022918": {}, "3.7642023989608773": {"4.355556259674693": false, "4.581143805117048": false, "4.759650224177936": true, "4.866670300870532": false}, "4.759650224177936": {}, "4.603734489187504": {"4.991691285852212": false, "4.996319666308555": true}, "4.996319666308555": {}}, {"1": {"1.4313969467864534": false, "1.57642432015309": false, "1.862833732973678": false, "2.0301207726213826": true, "2.339020946529119": false, "2.5247389926368276": false, "3.4900258504105452": false, "3.7642023989608773": true, "4.603734489187504": true, "4.829203053325798": false}, "2.0301207726213826": {"2.129431432781357": true, "2.9670797663721937": false, "3.004103471766069": false, "3.1835486621946294": true, "3.4601733361752944": false, "4.596435179217099": false, "4.806113560827569": false}, "2.129431432781357": {"2.633496588167189": false, "4.359702121492351": true, "4.819019125307129": false}, "4.359702121492351": {}, "3.1835486621946294": {"3.3631757248128213": false, "4.538957041022918": true, "4.879509519749163": false}, "4.538957041022918": {}, "3.7642023989608773": {"4.355556259674693": false, "4.581143805117048": false, "4.759650224177936": true, "4.866670300870532": false}, "4.759650224177936": {}, "4.603734489187504": {"4.991691285852212": false, "4.996319666308555": true}, "4.996319666308555": {}}, {"1": {"1.4313969467864534": false, "1.57642432015309": false, "1.862833732973678": false, "2.0301207726213826": true, "2.339020946529119": false, "2.5247389926368276": false, "3.4900258504105452": false, "3.7642023989608773": true, "4.603734489187504": true, "4.829203053325798": false}, "2.0301207726213826": {"2.129431432781357": true, "2.9670797663721937": false, "3.004103471766069": false, "3.1835486621946294": true, "3.4601733361752944": false, "4.596435179217099": false, "4.806113560827569": false}, "2.129431432781357": {"2.633496588167189": false, "4.359702121492351": true, "4.819019125307129": false}, "4.359702121492351": {}, "3.1835486621946294": {"3.3631757248128213": false, "4.538957041022918": true, "4.879509519749163": false}, "4.538957041022918": {}, "3.7642023989608773": {"4.355556259674693": false, "4.581143805117048": false, "4.759650224177936": true, "4.866670300870532": false}, "4.759650224177936": {}, "4.603734489187504": {"4.991691285852212": false, "4.996319666308555": true}, "4.996319666308555": {}}, {"1": {"1.4313969467864534": false, "1.57642432015309": false, "1.862833732973678": false, "2.0301207726213826": true, "2.339020946529119": false, "2.5247389926368276": false, "3.4900258504105452": false, "3.7642023989608773": true, "4.603734489187504": true, "4.829203053325798": false}, "2.0301207726213826": {"2.129431432781357": true, "2.9670797663721937": false, "3.004103471766069": false, "3.1835486621946294": true, "3.4601733361752944": false, "4.596435179217099": false, "4.806113560827569": false}, "2.129431432781357": {"2.633496588167189": false, "4.359702121492351": true, "4.819019125307129": false}, "4.359702121492351": {}, "3.1835486621946294": {"3.3631757248128213": false, "4.538957041022918": true, "4.879509519749163": false}, "4.538957041022918": {}, "3.7642023989608773": {"4.355556259674693": false, "4.581143805117048": false, "4.759650224177936": true, "4.866670300870532": false}, "4.759650224177936": {}, "4.603734489187504": {"4.991691285852212": false, "4.996319666308555": true}, "4.996319666308555": {}}, {"1": {"1.4313969467864534": false, "1.57642432015309": false, "1.862833732973678": false, "2.0301207726213826": true, "2.339020946529119": false, "2.5247389926368276": false, "3.4900258504105452": false, "3.7642023989608773": true, "4.603734489187504": true, "4.829203053325798": false}, "2.0301207726213826": {"2.129431432781357": true, "2.9670797663721937": false, "3.004103471766069": false, "3.1835486621946294": true, "3.4601733361752944": false, "4.596435179217099": false, "4.806113560827569": false}, "2.129431432781357": {"2.633496588167189": false, "4.359702121492351": true, "4.819019125307129": false}, "4.359702121492351": {}, "3.1835486621946294": {"3.3631757248128213": false, "4.538957041022918": true, "4.879509519749163": false}, "4.538957041022918": {}, "3.7642023989608773": {"4.355556259674693": false, "4.581143805117048": false, "4.759650224177936": true, "4.866670300870532": false}, "4.759650224177936": {}, "4.603734489187504": {"4.991691285852212": false, "4.996319666308555": true}, "4.996319666308555": {}}, {"1": {"1.4313969467864534": false, "1.57642432015309": false, "1.862833732973678": false, "2.0301207726213826": true, "2.339020946529119": false, "2.5247389926368276": false, "3.4900258504105452": false, "3.7642023989608773": true, "4.603734489187504": true, "4.829203053325798": false}, "2.0301207726213826": {"2.129431432781357": true, "2.9670797663721937": false, "3.004103471766069": false, "3.1835486621946294": true, "3.4601733361752944": false, "4.596435179217099": false, "4.806113560827569": false}, "2.129431432781357": {"2.633496588167189": false, "4.359702121492351": true, "4.819019125307129": false}, "4.359702121492351": {}, "3.1835486621946294": {"3.3631757248128213": false, "4.538957041022918": true, "4.879509519749163": false}, "4.538957041022918": {}, "3.7642023989608773": {"4.355556259674693": false, "4.581143805117048": false, "4.759650224177936": true, "4.866670300870532": false}, "4.759650224177936": {}, "4.603734489187504": {"4.991691285852212": false, "4.996319666308555": true}, "4.996319666308555": {}}, {"1": {"1.4313969467864534": false, "1.57642432015309": false, "1.862833732973678": false, "2.0301207726213826": true, "2.339020946529119": false, "2.5247389926368276": false, "3.4900258504105452": false, "3.7642023989608773": true, "4.603734489187504": true, "4.829203053325798": false}, "2.0301207726213826": {"2.129431432781357": true, "2.9670797663721937": false, "3.004103471766069": false, "3.1835486621946294": true, "3.4601733361752944": false, "4.596435179217099": false, "4.806113560827569": false}, "2.129431432781357": {"2.633496588167189": false, "4.359702121492351": true, "4.819019125307129": false}, "4.359702121492351": {}, "3.1835486621946294": {"3.3631757248128213": false, "4.538957041022918": true, "4.879509519749163": false}, "4.538957041022918": {}, "3.7642023989608773": {"4.355556259674693": false, "4.581143805117048": false, "4.759650224177936": true, "4.866670300870532": false}, "4.759650224177936": {}, "4.603734489187504": {"4.991691285852212": false, "4.996319666308555": true}, "4.996319666308555": {}}, {"1": {"1.4313969467864534": false, "1.57642432015309": false, "1.862833732973678": false, "2.0301207726213826": true, "2.339020946529119": false, "2.5247389926368276": false, "3.4900258504105452": false, "3.7642023989608773": true, "4.603734489187504": true, "4.829203053325798": false}, "2.0301207726213826": {"2.129431432781357": true, "2.9670797663721937": false, "3.004103471766069": false, "3.1835486621946294": true, "3.4601733361752944": false, "4.596435179217099": false, "4.806113560827569": false}, "2.129431432781357": {"2.633496588167189": false, "4.359702121492351": true, "4.819019125307129": false}, "4.359702121492351": {}, "3.1835486621946294": {"3.3631757248128213": false, "4.538957041022918": true, "4.879509519749163": false}, "4.538957041022918": {}, "3.7642023989608773": {"4.355556259674693": false, "4.581143805117048": false, "4.759650224177936": true, "4.866670300870532": false}, "4.759650224177936": {}, "4.603734489187504": {"4.991691285852212": false, "4.996319666308555": true}, "4.996319666308555": {}}, {"1": {"1.4313969467864534": false, "1.57642432015309": false, "1.862833732973678": false, "2.0301207726213826": true, "2.339020946529119": false, "2.5247389926368276": false, "3.4900258504105452": false, "3.7642023989608773": true, "4.603734489187504": true, "4.829203053325798": false}, "2.0301207726213826": {"2.129431432781357": true, "2.9670797663721937": false, "3.004103471766069": false, "3.1835486621946294": true, "3.4601733361752944": false, "4.596435179217099": false, "4.806113560827569": false}, "2.129431432781357": {"2.633496588167189": false, "4.359702121492351": true, "4.819019125307129": false}, "4.359702121492351": {}, "3.1835486621946294": {"3.3631757248128213": false, "4.538957041022918": true, "4.879509519749163": false}, "4.538957041022918": {}, "3.7642023989608773": {"4.355556259674693": false, "4.581143805117048": false, "4.759650224177936": true, "4.866670300870532": false}, "4.759650224177936": {}, "4.603734489187504": {"4.991691285852212": false, "4.996319666308555": true}, "4.996319666308555": {}}, {"1": {"1.4313969467864534": false, "1.57642432015309": false, "1.862833732973678": false, "2.0301207726213826": true, "2.339020946529119": false, "2.5247389926368276": false, "3.4900258504105452": false, "3.7642023989608773": true, "4.603734489187504": true, "4.829203053325798": false}, "2.0301207726213826": {"2.129431432781357": true, "2.9670797663721937": false, "3.004103471766069": false, "3.1835486621946294": true, "3.4601733361752944": false, "4.596435179217099": false, "4.806113560827569": false}, "2.129431432781357": {"2.633496588167189": false, "4.359702121492351": true, "4.819019125307129": false}, "4.359702121492351": {}, "3.1835486621946294": {"3.3631757248128213": false, "4.538957041022918": true, "4.879509519749163": false}, "4.538957041022918": {}, "3.7642023989608773": {"4.355556259674693": false, "4.581143805117048": false, "4.759650224177936": true, "4.866670300870532": false}, "4.759650224177936": {}, "4.603734489187504": {"4.991691285852212": false, "4.996319666308555": true}, "4.996319666308555": {}}, {"1": {"1.4313969467864534": false, "1.57642432015309": false, "1.862833732973678": false, "2.0301207726213826": true, "2.339020946529119": false, "2.5247389926368276": false, "3.4900258504105452": false, "3.7642023989608773": true, "4.603734489187504": true, "4.829203053325798": false}, "2.0301207726213826": {"2.129431432781357": true, "2.9670797663721937": false, "3.004103471766069": false, "3.1835486621946294": true, "3.4601733361752944": false, "4.596435179217099": false, "4.806113560827569": false}, "2.129431432781357": {"2.633496588167189": false, "4.359702121492351": true, "4.819019125307129": false}, "4.359702121492351": {}, "3.1835486621946294": {"3.3631757248128213": false, "4.538957041022918": true, "4.879509519749163": false}, "4.538957041022918": {}, "3.7642023989608773": {"4.355556259674693": false, "4.581143805117048": false, "4.759650224177936": true, "4.866670300870532": false}, "4.759650224177936": {}, "4.603734489187504": {"4.991691285852212": false, "4.996319666308555": true}, "4.996319666308555": {}}, {"1": {"1.4313969467864534": false, "1.57642432015309": false, "1.862833732973678": false, "2.0301207726213826": true, "2.339020946529119": false, "2.5247389926368276": false, "3.4900258504105452": false, "3.7642023989608773": true, "4.603734489187504": true, "4.829203053325798": false}, "2.0301207726213826": {"2.129431432781357": true, "2.9670797663721937": false, "3.004103471766069": false, "3.1835486621946294": true, "3.4601733361752944": false, "4.596435179217099": false, "4.806113560827569": false}, "2.129431432781357": {"2.633496588167189": false, "4.359702121492351": true, "4.819019125307129": false}, "4.359702121492351": {}, "3.1835486621946294": {"3.3631757248128213": false, "4.538957041022918": true, "4.879509519749163": false}, "4.538957041022918": {}, "3.7642023989608773": {"4.355556259674693": false, "4.581143805117048": false, "4.759650224177936": true, "4.866670300870532": false}, "4.759650224177936": {}, "4.603734489187504": {"4.991691285852212": false, "4.996319666308555": true}, "4.996319666308555": {}}, {"1": {"1.4313969467864534": false, "1.57642432015309": false, "1.862833732973678": false, "2.0301207726213826": true, "2.339020946529119": false, "2.5247389926368276": false, "3.4900258504105452": false, "3.7642023989608773": true, "4.603734489187504": true, "4.829203053325798": false}, "2.0301207726213826": {"2.129431432781357": true, "2.9670797663721937": false, "3.004103471766069": false, "3.1835486621946294": true, "3.4601733361752944": false, "4.596435179217099": false, "4.806113560827569": false}, "2.129431432781357": {"2.633496588167189": false, "4.359702121492351": true, "4.819019125307129": false}, "4.359702121492351": {}, "3.1835486621946294": {"3.3631757248128213": false, "4.538957041022918": true, "4.879509519749163": false}, "4.538957041022918": {}, "3.7642023989608773": {"4.355556259674693": false, "4.581143805117048": false, "4.759650224177936": true, "4.866670300870532": false}, "4.759650224177936": {}, "4.603734489187504": {"4.991691285852212": false, "4.996319666308555": true}, "4.996319666308555": {}}, {"1": {"1.4313969467864534": false, "1.57642432015309": false, "1.862833732973678": false, "2.0301207726213826": true, "2.339020946529119": false, "2.5247389926368276": false, "3.4900258504105452": false, "3.7642023989608773": true, "4.603734489187504": true, "4.829203053325798": false}, "2.0301207726213826": {"2.129431432781357": true, "2.9670797663721937": false, "3.004103471766069": false, "3.1835486621946294": true, "3.4601733361752944": false, "4.596435179217099": false, "4.806113560827569": false}, "2.129431432781357": {"2.633496588167189": false, "4.359702121492351": true, "4.819019125307129": false}, "4.359702121492351": {}, "3.1835486621946294": {"3.3631757248128213": false, "4.538957041022918": true, "4.879509519749163": false}, "4.538957041022918": {}, "3.7642023989608773": {"4.355556259674693": false, "4.581143805117048": false, "4.759650224177936": true, "4.866670300870532": false}, "4.759650224177936": {}, "4.603734489187504": {"4.991691285852212": false, "4.996319666308555": true}, "4.996319666308555": {}}, {"1": {"1.4313969467864534": false, "1.57642432015309": false, "1.862833732973678": false, "2.0301207726213826": true, "2.339020946529119": false, "2.5247389926368276": false, "3.4900258504105452": false, "3.7642023989608773": true, "4.603734489187504": true, "4.829203053325798": false}, "2.0301207726213826": {"2.129431432781357": true, "2.9670797663721937": false, "3.004103471766069": false, "3.1835486621946294": true, "3.4601733361752944": false, "4.596435179217099": false, "4.806113560827569": false}, "2.129431432781357": {"2.633496588167189": false, "4.359702121492351": true, "4.819019125307129": false}, "4.359702121492351": {}, "3.1835486621946294": {"3.3631757248128213": false, "4.538957041022918": true, "4.879509519749163": false}, "4.538957041022918": {}, "3.7642023989608773": {"4.355556259674693": false, "4.581143805117048": false, "4.759650224177936": true, "4.866670300870532": false}, "4.759650224177936": {}, "4.603734489187504": {"4.991691285852212": false, "4.996319666308555": true}, "4.996319666308555": {}}, {"1": {"1.4313969467864534": false, "1.57642432015309": false, "1.862833732973678": false, "2.0301207726213826": true, "2.339020946529119": false, "2.5247389926368276": false, "3.4900258504105452": false, "3.7642023989608773": true, "4.603734489187504": true, "4.829203053325798": false}, "2.0301207726213826": {"2.129431432781357": true, "2.9670797663721937": false, "3.004103471766069": false, "3.1835486621946294": true, "3.4601733361752944": false, "4.596435179217099": false, "4.806113560827569": false}, "2.129431432781357": {"2.633496588167189": false, "4.359702121492351": true, "4.819019125307129": false}, "4.359702121492351": {}, "3.1835486621946294": {"3.3631757248128213": false, "4.538957041022918": true, "4.879509519749163": false}, "4.538957041022918": {}, "3.7642023989608773": {"4.355556259674693": false, "4.581143805117048": false, "4.759650224177936": true, "4.866670300870532": false}, "4.759650224177936": {}, "4.603734489187504": {"4.991691285852212": false, "4.996319666308555": true}, "4.996319666308555": {}}, {"1": {"1.4313969467864534": false, "1.57642432015309": false, "1.862833732973678": false, "2.0301207726213826": true, "2.339020946529119": false, "2.5247389926368276": false, "3.4900258504105452": false, "3.7642023989608773": true, "4.603734489187504": true, "4.829203053325798": false}, "2.0301207726213826": {"2.129431432781357": true, "2.9670797663721937": false, "3.004103471766069": false, "3.1835486621946294": true, "3.4601733361752944": false, "4.596435179217099": false, "4.806113560827569": false}, "2.129431432781357": {"2.633496588167189": false, "4.359702121492351": true, "4.819019125307129": false}, "4.359702121492351": {}, "3.1835486621946294": {"3.3631757248128213": false, "4.538957041022918": true, "4.879509519749163": false}, "4.538957041022918": {}, "3.7642023989608773": {"4.355556259674693": false, "4.581143805117048": false, "4.759650224177936": true, "4.866670300870532": false}, "4.759650224177936": {}, "4.603734489187504": {"4.991691285852212": false, "4.996319666308555": true}, "4.996319666308555": {}}, {"1": {"1.4313969467864534": false, "1.57642432015309": false, "1.862833732973678": false, "2.0301207726213826": true, "2.339020946529119": false, "2.5247389926368276": false, "3.4900258504105452": false, "3.7642023989608773": true, "4.603734489187504": true, "4.829203053325798": false}, "2.0301207726213826": {"2.129431432781357": true, "2.9670797663721937": false, "3.004103471766069": false, "3.1835486621946294": true, "3.4601733361752944": false, "4.596435179217099": false, "4.806113560827569": false}, "2.129431432781357": {"2.633496588167189": false, "4.359702121492351": true, "4.819019125307129": false}, "4.359702121492351": {}, "3.1835486621946294": {"3.3631757248128213": false, "4.538957041022918": true, "4.879509519749163": false}, "4.538957041022918": {}, "3.7642023989608773": {"4.355556259674693": false, "4.581143805117048": false, "4.759650224177936": true, "4.866670300870532": false}, "4.759650224177936": {}, "4.603734489187504": {"4.991691285852212": false, "4.996319666308555": true}, "4.996319666308555": {}}, {"1": {"1.4313969467864534": false, "1.57642432015309": false, "1.862833732973678": false, "2.0301207726213826": true, "2.339020946529119": false, "2.5247389926368276": false, "3.4900258504105452": false, "3.7642023989608773": true, "4.603734489187504": true, "4.829203053325798": false}, "2.0301207726213826": {"2.129431432781357": true, "2.9670797663721937": false, "3.004103471766069": false, "3.1835486621946294": true, "3.4601733361752944": false, "4.596435179217099": false, "4.806113560827569": false}, "2.129431432781357": {"2.633496588167189": false, "4.359702121492351": true, "4.819019125307129": false}, "4.359702121492351": {}, "3.1835486621946294": {"3.3631757248128213": false, "4.538957041022918": true, "4.879509519749163": false}, "4.538957041022918": {}, "3.7642023989608773": {"4.355556259674693": false, "4.581143805117048": false, "4.759650224177936": true, "4.866670300870532": false}, "4.759650224177936": {}, "4.603734489187504": {"4.991691285852212": false, "4.996319666308555": true}, "4.996319666308555": {}}, {"1": {"1.4313969467864534": false, "1.57642432015309": false, "1.862833732973678": false, "2.0301207726213826": true, "2.339020946529119": false, "2.5247389926368276": false, "3.4900258504105452": false, "3.7642023989608773": true, "4.603734489187504": true, "4.829203053325798": false}, "2.0301207726213826": {"2.129431432781357": true, "2.9670797663721937": false, "3.004103471766069": false, "3.1835486621946294": true, "3.4601733361752944": false, "4.596435179217099": false, "4.806113560827569": false}, "2.129431432781357": {"2.633496588167189": false, "4.359702121492351": true, "4.819019125307129": false}, "4.359702121492351": {}, "3.1835486621946294": {"3.3631757248128213": false, "4.538957041022918": true, "4.879509519749163": false}, "4.538957041022918": {}, "3.7642023989608773": {"4.355556259674693": false, "4.581143805117048": false, "4.759650224177936": true, "4.866670300870532": false}, "4.759650224177936": {}, "4.603734489187504": {"4.991691285852212": false, "4.996319666308555": true}, "4.996319666308555": {}}, {"1": {"1.4313969467864534": false, "1.57642432015309": false, "1.862833732973678": false, "2.0301207726213826": true, "2.339020946529119": false, "2.5247389926368276": false, "3.4900258504105452": false, "3.7642023989608773": true, "4.603734489187504": true, "4.829203053325798": false}, "2.0301207726213826": {"2.129431432781357": true, "2.9670797663721937": false, "3.004103471766069": false, "3.1835486621946294": true, "3.4601733361752944": false, "4.596435179217099": false, "4.806113560827569": false}, "2.129431432781357": {"2.633496588167189": false, "4.359702121492351": true, "4.819019125307129": false}, "4.359702121492351": {}, "3.1835486621946294": {"3.3631757248128213": false, "4.538957041022918": true, "4.879509519749163": false}, "4.538957041022918": {}, "3.7642023989608773": {"4.355556259674693": false, "4.581143805117048": false, "4.759650224177936": true, "4.866670300870532": false}, "4.759650224177936": {}, "4.603734489187504": {"4.991691285852212": false, "4.996319666308555": true}, "4.996319666308555": {}}, {"1": {"1.4313969467864534": false, "1.57642432015309": false, "1.862833732973678": false, "2.0301207726213826": true, "2.339020946529119": false, "2.5247389926368276": false, "3.4900258504105452": false, "3.7642023989608773": true, "4.603734489187504": true, "4.829203053325798": false}, "2.0301207726213826": {"2.129431432781357": true, "2.9670797663721937": false, "3.004103471766069": false, "3.1835486621946294": true, "3.4601733361752944": false, "4.596435179217099": false, "4.806113560827569": false}, "2.129431432781357": {"2.633496588167189": false, "4.359702121492351": true, "4.819019125307129": false}, "4.359702121492351": {}, "3.1835486621946294": {"3.3631757248128213": false, "4.538957041022918": true, "4.879509519749163": false}, "4.538957041022918": {}, "3.7642023989608773": {"4.355556259674693": false, "4.581143805117048": false, "4.759650224177936": true, "4.866670300870532": false}, "4.759650224177936": {}, "4.603734489187504": {"4.991691285852212": false, "4.996319666308555": true}, "4.996319666308555": {}}, {"1": {"1.4313969467864534": false, "1.57642432015309": false, "1.862833732973678": false, "2.0301207726213826": true, "2.339020946529119": false, "2.5247389926368276": false, "3.4900258504105452": false, "3.7642023989608773": true, "4.603734489187504": true, "4.829203053325798": false}, "2.0301207726213826": {"2.129431432781357": true, "2.9670797663721937": false, "3.004103471766069": false, "3.1835486621946294": true, "3.4601733361752944": false, "4.596435179217099": false, "4.806113560827569": false}, "2.129431432781357": {"2.633496588167189": false, "4.359702121492351": true, "4.819019125307129": false}, "4.359702121492351": {}, "3.1835486621946294": {"3.3631757248128213": false, "4.538957041022918": true, "4.879509519749163": false}, "4.538957041022918": {}, "3.7642023989608773": {"4.355556259674693": false, "4.581143805117048": false, "4.759650224177936": true, "4.866670300870532": false}, "4.759650224177936": {}, "4.603734489187504": {"4.991691285852212": false, "4.996319666308555": true}, "4.996319666308555": {}}, {"1": {"1.4313969467864534": false, "1.57642432015309": false, "1.862833732973678": false, "2.0301207726213826": true, "2.339020946529119": false, "2.5247389926368276": false, "3.4900258504105452": false, "3.7642023989608773": true, "4.603734489187504": true, "4.829203053325798": false}, "2.0301207726213826": {"2.129431432781357": true, "2.9670797663721937": false, "3.004103471766069": false, "3.1835486621946294": true, "3.4601733361752944": false, "4.596435179217099": false, "4.806113560827569": false}, "2.129431432781357": {"2.633496588167189": false, "4.359702121492351": true, "4.819019125307129": false}, "4.359702121492351": {}, "3.1835486621946294": {"3.3631757248128213": false, "4.538957041022918": true, "4.879509519749163": false}, "4.538957041022918": {}, "3.7642023989608773": {"4.355556259674693": false, "4.581143805117048": false, "4.759650224177936": true, "4.866670300870532": false}, "4.759650224177936": {}, "4.603734489187504": {"4.991691285852212": false, "4.996319666308555": true}, "4.996319666308555": {}}, {"1": {"1.4313969467864534": false, "1.57642432015309": false, "1.862833732973678": false, "2.0301207726213826": true, "2.339020946529119": false, "2.5247389926368276": false, "3.4900258504105452": false, "3.7642023989608773": true, "4.603734489187504": true, "4.829203053325798": false}, "2.0301207726213826": {"2.129431432781357": true, "2.9670797663721937": false, "3.004103471766069": false, "3.1835486621946294": true, "3.4601733361752944": false, "4.596435179217099": false, "4.806113560827569": false}, "2.129431432781357": {"2.633496588167189": false, "4.359702121492351": true, "4.819019125307129": false}, "4.359702121492351": {}, "3.1835486621946294": {"3.3631757248128213": false, "4.538957041022918": true, "4.879509519749163": false}, "4.538957041022918": {}, "3.7642023989608773": {"4.355556259674693": false, "4.581143805117048": false, "4.759650224177936": true, "4.866670300870532": false}, "4.759650224177936": {}, "4.603734489187504": {"4.991691285852212": false, "4.996319666308555": true}, "4.996319666308555": {}}, {"1": {"1.4313969467864534": false, "1.57642432015309": false, "1.862833732973678": false, "2.0301207726213826": true, "2.339020946529119": false, "2.5247389926368276": false, "3.4900258504105452": false, "3.7642023989608773": true, "4.603734489187504": true, "4.829203053325798": false}, "2.0301207726213826": {"2.129431432781357": true, "2.9670797663721937": false, "3.004103471766069": false, "3.1835486621946294": true, "3.4601733361752944": false, "4.596435179217099": false, "4.806113560827569": false}, "2.129431432781357": {"2.633496588167189": false, "4.359702121492351": true, "4.819019125307129": false}, "4.359702121492351": {}, "3.1835486621946294": {"3.3631757248128213": false, "4.538957041022918": true, "4.879509519749163": false}, "4.538957041022918": {}, "3.7642023989608773": {"4.355556259674693": false, "4.581143805117048": false, "4.759650224177936": true, "4.866670300870532": false}, "4.759650224177936": {}, "4.603734489187504": {"4.991691285852212": false, "4.996319666308555": true}, "4.996319666308555": {}}, {"1": {"1.4313969467864534": false, "1.57642432015309": false, "1.862833732973678": false, "2.0301207726213826": true, "2.339020946529119": false, "2.5247389926368276": false, "3.4900258504105452": false, "3.7642023989608773": true, "4.603734489187504": true, "4.829203053325798": false}, "2.0301207726213826": {"2.129431432781357": true, "2.9670797663721937": false, "3.004103471766069": false, "3.1835486621946294": true, "3.4601733361752944": false, "4.596435179217099": false, "4.806113560827569": false}, "2.129431432781357": {"2.633496588167189": false, "4.359702121492351": true, "4.819019125307129": false}, "4.359702121492351": {}, "3.1835486621946294": {"3.3631757248128213": false, "4.538957041022918": true, "4.879509519749163": false}, "4.538957041022918": {}, "3.7642023989608773": {"4.355556259674693": false, "4.581143805117048": false, "4.759650224177936": true, "4.866670300870532": false}, "4.759650224177936": {}, "4.603734489187504": {"4.991691285852212": false, "4.996319666308555": true}, "4.996319666308555": {}}, {"1": {"1.4313969467864534": false, "1.57642432015309": false, "1.862833732973678": false, "2.0301207726213826": true, "2.339020946529119": false, "2.5247389926368276": false, "3.4900258504105452": false, "3.7642023989608773": true, "4.603734489187504": true, "4.829203053325798": false}, "2.0301207726213826": {"2.129431432781357": true, "2.9670797663721937": false, "3.004103471766069": false, "3.1835486621946294": true, "3.4601733361752944": false, "4.596435179217099": false, "4.806113560827569": false}, "2.129431432781357": {"2.633496588167189": false, "4.359702121492351": true, "4.819019125307129": false}, "4.359702121492351": {}, "3.1835486621946294": {"3.3631757248128213": false, "4.538957041022918": true, "4.879509519749163": false}, "4.538957041022918": {}, "3.7642023989608773": {"4.355556259674693": false, "4.581143805117048": false, "4.759650224177936": true, "4.866670300870532": false}, "4.759650224177936": {}, "4.603734489187504": {"4.991691285852212": false, "4.996319666308555": true}, "4.996319666308555": {}}, {"1": {"1.4313969467864534": false, "1.57642432015309": false, "1.862833732973678": false, "2.0301207726213826": true, "2.339020946529119": false, "2.5247389926368276": false, "3.4900258504105452": false, "3.7642023989608773": true, "4.603734489187504": true, "4.829203053325798": false}, "2.0301207726213826": {"2.129431432781357": true, "2.9670797663721937": false, "3.004103471766069": false, "3.1835486621946294": true, "3.4601733361752944": false, "4.596435179217099": false, "4.806113560827569": false}, "2.129431432781357": {"2.633496588167189": false, "4.359702121492351": true, "4.819019125307129": false}, "4.359702121492351": {}, "3.1835486621946294": {"3.3631757248128213": false, "4.538957041022918": true, "4.879509519749163": false}, "4.538957041022918": {}, "3.7642023989608773": {"4.355556259674693": false, "4.581143805117048": false, "4.759650224177936": true, "4.866670300870532": false}, "4.759650224177936": {}, "4.603734489187504": {"4.991691285852212": false, "4.996319666308555": true}, "4.996319666308555": {}}, {"1": {"1.4313969467864534": false, "1.57642432015309": false, "1.862833732973678": false, "2.0301207726213826": true, "2.339020946529119": false, "2.5247389926368276": false, "3.4900258504105452": false, "3.7642023989608773": true, "4.603734489187504": true, "4.829203053325798": false}, "2.0301207726213826": {"2.129431432781357": true, "2.9670797663721937": false, "3.004103471766069": false, "3.1835486621946294": true, "3.4601733361752944": false, "4.596435179217099": false, "4.806113560827569": false}, "2.129431432781357": {"2.633496588167189": false, "4.359702121492351": true, "4.819019125307129": false}, "4.359702121492351": {}, "3.1835486621946294": {"3.3631757248128213": false, "4.538957041022918": true, "4.879509519749163": false}, "4.538957041022918": {}, "3.7642023989608773": {"4.355556259674693": false, "4.581143805117048": false, "4.759650224177936": true, "4.866670300870532": false}, "4.759650224177936": {}, "4.603734489187504": {"4.991691285852212": false, "4.996319666308555": true}, "4.996319666308555": {}}, {"1": {"1.4313969467864534": false, "1.57642432015309": false, "1.862833732973678": false, "2.0301207726213826": true, "2.339020946529119": false, "2.5247389926368276": false, "3.4900258504105452": false, "3.7642023989608773": true, "4.603734489187504": true, "4.829203053325798": false}, "2.0301207726213826": {"2.129431432781357": true, "2.9670797663721937": false, "3.004103471766069": false, "3.1835486621946294": true, "3.4601733361752944": false, "4.596435179217099": false, "4.806113560827569": false}, "2.129431432781357": {"2.633496588167189": false, "4.359702121492351": true, "4.819019125307129": false}, "4.359702121492351": {}, "3.1835486621946294": {"3.3631757248128213": false, "4.538957041022918": true, "4.879509519749163": false}, "4.538957041022918": {}, "3.7642023989608773": {"4.355556259674693": false, "4.581143805117048": false, "4.759650224177936": true, "4.866670300870532": false}, "4.759650224177936": {}, "4.603734489187504": {"4.991691285852212": false, "4.996319666308555": true}, "4.996319666308555": {}}, {"1": {"1.4313969467864534": false, "1.57642432015309": false, "1.862833732973678": false, "2.0301207726213826": true, "2.339020946529119": false, "2.5247389926368276": false, "3.4900258504105452": false, "3.7642023989608773": true, "4.603734489187504": true, "4.829203053325798": false}, "2.0301207726213826": {"2.129431432781357": true, "2.9670797663721937": false, "3.004103471766069": false, "3.1835486621946294": true, "3.4601733361752944": false, "4.596435179217099": false, "4.806113560827569": false}, "2.129431432781357": {"2.633496588167189": false, "4.359702121492351": true, "4.819019125307129": false}, "4.359702121492351": {}, "3.1835486621946294": {"3.3631757248128213": false, "4.538957041022918": true, "4.879509519749163": false}, "4.538957041022918": {}, "3.7642023989608773": {"4.355556259674693": false, "4.581143805117048": false, "4.759650224177936": true, "4.866670300870532": false}, "4.759650224177936": {}, "4.603734489187504": {"4.991691285852212": false, "4.996319666308555": true}, "4.996319666308555": {}}, {"1": {"1.4313969467864534": false, "1.57642432015309": false, "1.862833732973678": false, "2.0301207726213826": true, "2.339020946529119": false, "2.5247389926368276": false, "3.4900258504105452": false, "3.7642023989608773": true, "4.603734489187504": true, "4.829203053325798": false}, "2.0301207726213826": {"2.129431432781357": true, "2.9670797663721937": false, "3.004103471766069": false, "3.1835486621946294": true, "3.4601733361752944": false, "4.596435179217099": false, "4.806113560827569": false}, "2.129431432781357": {"2.633496588167189": false, "4.359702121492351": true, "4.819019125307129": false}, "4.359702121492351": {}, "3.1835486621946294": {"3.3631757248128213": false, "4.538957041022918": true, "4.879509519749163": false}, "4.538957041022918": {}, "3.7642023989608773": {"4.355556259674693": false, "4.581143805117048": false, "4.759650224177936": true, "4.866670300870532": false}, "4.759650224177936": {}, "4.603734489187504": {"4.991691285852212": false, "4.996319666308555": true}, "4.996319666308555": {}}, {"1": {"1.4313969467864534": false, "1.57642432015309": false, "1.862833732973678": false, "2.0301207726213826": true, "2.339020946529119": false, "2.5247389926368276": false, "3.4900258504105452": false, "3.7642023989608773": true, "4.603734489187504": true, "4.829203053325798": false}, "2.0301207726213826": {"2.129431432781357": true, "2.9670797663721937": false, "3.004103471766069": false, "3.1835486621946294": true, "3.4601733361752944": false, "4.596435179217099": false, "4.806113560827569": false}, "2.129431432781357": {"2.633496588167189": false, "4.359702121492351": true, "4.819019125307129": false}, "4.359702121492351": {}, "3.1835486621946294": {"3.3631757248128213": false, "4.538957041022918": true, "4.879509519749163": false}, "4.538957041022918": {}, "3.7642023989608773": {"4.355556259674693": false, "4.581143805117048": false, "4.759650224177936": true, "4.866670300870532": false}, "4.759650224177936": {}, "4.603734489187504": {"4.991691285852212": false, "4.996319666308555": true}, "4.996319666308555": {}}, {"1": {"1.4313969467864534": false, "1.57642432015309": false, "1.862833732973678": false, "2.0301207726213826": true, "2.339020946529119": false, "2.5247389926368276": false, "3.4900258504105452": false, "3.7642023989608773": true, "4.603734489187504": true, "4.829203053325798": false}, "2.0301207726213826": {"2.129431432781357": true, "2.9670797663721937": false, "3.004103471766069": false, "3.1835486621946294": true, "3.4601733361752944": false, "4.596435179217099": false, "4.806113560827569": false}, "2.129431432781357": {"2.633496588167189": false, "4.359702121492351": true, "4.819019125307129": false}, "4.359702121492351": {}, "3.1835486621946294": {"3.3631757248128213": false, "4.538957041022918": true, "4.879509519749163": false}, "4.538957041022918": {}, "3.7642023989608773": {"4.355556259674693": false, "4.581143805117048": false, "4.759650224177936": true, "4.866670300870532": false}, "4.759650224177936": {}, "4.603734489187504": {"4.991691285852212": false, "4.996319666308555": true}, "4.996319666308555": {}}, {"1": {"1.4313969467864534": false, "1.57642432015309": false, "1.862833732973678": false, "2.0301207726213826": true, "2.339020946529119": false, "2.5247389926368276": false, "3.4900258504105452": false, "3.7642023989608773": true, "4.603734489187504": true, "4.829203053325798": false}, "2.0301207726213826": {"2.129431432781357": true, "2.9670797663721937": false, "3.004103471766069": false, "3.1835486621946294": true, "3.4601733361752944": false, "4.596435179217099": false, "4.806113560827569": false}, "2.129431432781357": {"2.633496588167189": false, "4.359702121492351": true, "4.819019125307129": false}, "4.359702121492351": {}, "3.1835486621946294": {"3.3631757248128213": false, "4.538957041022918": true, "4.879509519749163": false}, "4.538957041022918": {}, "3.7642023989608773": {"4.355556259674693": false, "4.581143805117048": false, "4.759650224177936": true, "4.866670300870532": false}, "4.759650224177936": {}, "4.603734489187504": {"4.991691285852212": false, "4.996319666308555": true}, "4.996319666308555": {}}, {"1": {"1.1160124166521432": false, "1.3173472151950205": false, "1.5571234983934121": false, "2.2781738407145706": true, "3.0438248317324237": false, "3.875466976227463": false, "4.457974702180334": false}, "2.2781738407145706": {"2.806265145162949": false, "3.0183287469567968": false, "3.460425834366852": false, "3.8020736912045203": false, "4.57694700518965": false}}, {"1": {"1.1160124166521432": false, "1.3173472151950205": false, "1.5571234983934121": false, "2.2781738407145706": true, "3.0438248317324237": false, "3.875466976227463": false, "4.457974702180334": false}, "2.2781738407145706": {"2.806265145162949": false, "3.0183287469567968": false, "3.460425834366852": false, "3.8020736912045203": false, "4.57694700518965": false}}, {"1": {"1.1160124166521432": false, "1.3173472151950205": false, "1.5571234983934121": false, "2.2781738407145706": true, "3.0438248317324237": false, "3.875466976227463": false, "4.457974702180334": false}, "2.2781738407145706": {"2.806265145162949": false, "3.0183287469567968": false, "3.460425834366852": false, "3.8020736912045203": false, "4.57694700518965": false}}, {"1": {"1.1160124166521432": false, "1.3173472151950205": false, "1.5571234983934121": false, "2.2781738407145706": true, "3.0438248317324237": false, "3.875466976227463": false, "4.457974702180334": false}, "2.2781738407145706": {"2.806265145162949": false, "3.0183287469567968": false, "3.460425834366852": false, "3.8020736912045203": false, "4.57694700518965": false}}, {"1": {"1.1160124166521432": false, "1.3173472151950205": false, "1.5571234983934121": false, "2.2781738407145706": true, "3.0438248317324237": false, "3.875466976227463": false, "4.457974702180334": false}, "2.2781738407145706": {"2.806265145162949": false, "3.0183287469567968": false, "3.460425834366852": false, "3.8020736912045203": false, "4.57694700518965": false}}, {"1": {"1.1160124166521432": false, "1.3173472151950205": false, "1.5571234983934121": false, "2.2781738407145706": true, "3.0438248317324237": false, "3.875466976227463": false, "4.457974702180334": false}, "2.2781738407145706": {"2.806265145162949": false, "3.0183287469567968": false, "3.460425834366852": false, "3.8020736912045203": false, "4.57694700518965": false}}, {"1": {"1.1160124166521432": false, "1.3173472151950205": false, "1.5571234983934121": false, "2.2781738407145706": true, "3.0438248317324237": false, "3.875466976227463": false, "4.457974702180334": false}, "2.2781738407145706": {"2.806265145162949": false, "3.0183287469567968": false, "3.460425834366852": false, "3.8020736912045203": false, "4.57694700518965": false}}, {"1": {"1.1160124166521432": false, "1.3173472151950205": false, "1.5571234983934121": false, "2.2781738407145706": true, "3.0438248317324237": false, "3.875466976227463": false, "4.457974702180334": false}, "2.2781738407145706": {"2.806265145162949": false, "3.0183287469567968": false, "3.460425834366852": false, "3.8020736912045203": false, "4.57694700518965": false}}, {"1": {"1.1160124166521432": false, "1.3173472151950205": false, "1.5571234983934121": false, "2.2781738407145706": true, "3.0438248317324237": false, "3.875466976227463": false, "4.457974702180334": false}, "2.2781738407145706": {"2.806265145162949": false, "3.0183287469567968": false, "3.460425834366852": false, "3.8020736912045203": false, "4.57694700518965": false}}, {"1": {"1.1160124166521432": false, "1.3173472151950205": false, "1.5571234983934121": false, "2.2781738407145706": true, "3.0438248317324237": false, "3.875466976227463": false, "4.457974702180334": false}, "2.2781738407145706": {"2.806265145162949": false, "3.0183287469567968": false, "3.460425834366852": false, "3.8020736912045203": false, "4.57694700518965": false}}, {"1": {"1.1160124166521432": false, "1.3173472151950205": false, "1.5571234983934121": false, "2.2781738407145706": true, "3.0438248317324237": false, "3.875466976227463": false, "4.457974702180334": false}, "2.2781738407145706": {"2.806265145162949": false, "3.0183287469567968": false, "3.460425834366852": false, "3.8020736912045203": false, "4.57694700518965": false}}, {"1": {"1.1160124166521432": false, "1.3173472151950205": false, "1.5571234983934121": false, "2.2781738407145706": true, "3.0438248317324237": false, "3.875466976227463": false, "4.457974702180334": false}, "2.2781738407145706": {"2.806265145162949": false, "3.0183287469567968": false, "3.460425834366852": false, "3.8020736912045203": false, "4.57694700518965": false}}, {"1": {"1.1160124166521432": false, "1.3173472151950205": false, "1.5571234983934121": false, "2.2781738407145706": true, "3.0438248317324237": false, "3.875466976227463": false, "4.457974702180334": false}, "2.2781738407145706": {"2.806265145162949": false, "3.0183287469567968": false, "3.460425834366852": false, "3.8020736912045203": false, "4.57694700518965": false}}, {"1": {"1.1160124166521432": false, "1.3173472151950205": false, "1.5571234983934121": false, "2.2781738407145706": true, "3.0438248317324237": false, "3.875466976227463": false, "4.457974702180334": false}, "2.2781738407145706": {"2.806265145162949": false, "3.0183287469567968": false, "3.460425834366852": false, "3.8020736912045203": false, "4.57694700518965": false}}, {"1": {"1.1160124166521432": false, "1.3173472151950205": false, "1.5571234983934121": false, "2.2781738407145706": true, "3.0438248317324237": false, "3.875466976227463": false, "4.457974702180334": false}, "2.2781738407145706": {"2.806265145162949": false, "3.0183287469567968": false, "3.460425834366852": false, "3.8020736912045203": false, "4.57694700518965": false}}, {"1": {"1.1160124166521432": false, "1.3173472151950205": false, "1.5571234983934121": false, "2.2781738407145706": true, "3.0438248317324237": false, "3.875466976227463": false, "4.457974702180334": false}, "2.2781738407145706": {"2.806265145162949": false, "3.0183287469567968": false, "3.460425834366852": false, "3.8020736912045203": false, "4.57694700518965": false}}, {"1": {"1.1160124166521432": false, "1.3173472151950205": false, "1.5571234983934121": false, "2.2781738407145706": true, "3.0438248317324237": false, "3.875466976227463": false, "4.457974702180334": false}, "2.2781738407145706": {"2.806265145162949": false, "3.0183287469567968": false, "3.460425834366852": false, "3.8020736912045203": false, "4.57694700518965": false}}, {"1": {"1.1160124166521432": false, "1.3173472151950205": false, "1.5571234983934121": false, "2.2781738407145706": true, "3.0438248317324237": false, "3.875466976227463": false, "4.457974702180334": false}, "2.2781738407145706": {"2.806265145162949": false, "3.0183287469567968": false, "3.460425834366852": false, "3.8020736912045203": false, "4.57694700518965": false}}, {"1": {"1.1160124166521432": false, "1.3173472151950205": false, "1.5571234983934121": false, "2.2781738407145706": true, "3.0438248317324237": false, "3.875466976227463": false, "4.457974702180334": false}, "2.2781738407145706": {"2.806265145162949": false, "3.0183287469567968": false, "3.460425834366852": false, "3.8020736912045203": false, "4.57694700518965": false}}, {"1": {"1.1160124166521432": false, "1.3173472151950205": false, "1.5571234983934121": false, "2.2781738407145706": true, "3.0438248317324237": false, "3.875466976227463": false, "4.457974702180334": false}, "2.2781738407145706": {"2.806265145162949": false, "3.0183287469567968": false, "3.460425834366852": false, "3.8020736912045203": false, "4.57694700518965": false}}, {"1": {"1.1160124166521432": false, "1.3173472151950205": false, "1.5571234983934121": false, "2.2781738407145706": true, "3.0438248317324237": false, "3.875466976227463": false, "4.457974702180334": false}, "2.2781738407145706": {"2.806265145162949": false, "3.0183287469567968": false, "3.460425834366852": false, "3.8020736912045203": false, "4.57694700518965": false}}, {"1": {"1.1160124166521432": false, "1.3173472151950205": false, "1.5571234983934121": false, "2.2781738407145706": true, "3.0438248317324237": false, "3.875466976227463": false, "4.457974702180334": false}, "2.2781738407145706": {"2.806265145162949": false, "3.0183287469567968": false, "3.460425834366852": false, "3.8020736912045203": false, "4.57694700518965": false}}, {"1": {"1.1160124166521432": false, "1.3173472151950205": false, "1.5571234983934121": false, "2.2781738407145706": true, "3.0438248317324237": false, "3.875466976227463": false, "4.457974702180334": false}, "2.2781738407145706": {"2.806265145162949": false, "3.0183287469567968": false, "3.460425834366852": false, "3.8020736912045203": false, "4.57694700518965": false}}, {"1": {"1.1160124166521432": false, "1.3173472151950205": false, "1.5571234983934121": false, "2.2781738407145706": true, "3.0438248317324237": false, "3.875466976227463": false, "4.457974702180334": false}, "2.2781738407145706": {"2.806265145162949": false, "3.0183287469567968": false, "3.460425834366852": false, "3.8020736912045203": false, "4.57694700518965": false}}, {"1": {"1.1160124166521432": false, "1.3173472151950205": false, "1.5571234983934121": false, "2.2781738407145706": true, "3.0438248317324237": false, "3.875466976227463": false, "4.457974702180334": false}, "2.2781738407145706": {"2.806265145162949": false, "3.0183287469567968": false, "3.460425834366852": false, "3.8020736912045203": false, "4.57694700518965": false}}, {"1": {"1.1160124166521432": false, "1.3173472151950205": false, "1.5571234983934121": false, "2.2781738407145706": true, "3.0438248317324237": false, "3.875466976227463": false, "4.457974702180334": false}, "2.2781738407145706": {"2.806265145162949": false, "3.0183287469567968": false, "3.460425834366852": false, "3.8020736912045203": false, "4.57694700518965": false}}, {"1": {"1.1160124166521432": false, "1.3173472151950205": false, "1.5571234983934121": false, "2.2781738407145706": true, "3.0438248317324237": false, "3.875466976227463": false, "4.457974702180334": false}, "2.2781738407145706": {"2.806265145162949": false, "3.0183287469567968": false, "3.460425834366852": false, "3.8020736912045203": false, "4.57694700518965": false}}, {"1": {"1.1160124166521432": false, "1.3173472151950205": false, "1.5571234983934121": false, "2.2781738407145706": true, "3.0438248317324237": false, "3.875466976227463": false, "4.457974702180334": false}, "2.2781738407145706": {"2.806265145162949": false, "3.0183287469567968": false, "3.460425834366852": false, "3.8020736912045203": false, "4.57694700518965": false}}, {"1": {"1.1160124166521432": false, "1.3173472151950205": false, "1.5571234983934121": false, "2.2781738407145706": true, "3.0438248317324237": false, "3.875466976227463": false, "4.457974702180334": false}, "2.2781738407145706": {"2.806265145162949": false, "3.0183287469567968": false, "3.460425834366852": false, "3.8020736912045203": false, "4.57694700518965": false}}, {"1": {"1.1160124166521432": false, "1.3173472151950205": false, "1.5571234983934121": false, "2.2781738407145706": true, "3.0438248317324237": false, "3.875466976227463": false, "4.457974702180334": false}, "2.2781738407145706": {"2.806265145162949": false, "3.0183287469567968": false, "3.460425834366852": false, "3.8020736912045203": false, "4.57694700518965": false}}, {"1": {"1.1160124166521432": false, "1.3173472151950205": false, "1.5571234983934121": false, "2.2781738407145706": true, "3.0438248317324237": false, "3.875466976227463": false, "4.457974702180334": false}, "2.2781738407145706": {"2.806265145162949": false, "3.0183287469567968": false, "3.460425834366852": false, "3.8020736912045203": false, "4.57694700518965": false}}, {"1": {"1.1160124166521432": false, "1.3173472151950205": false, "1.5571234983934121": false, "2.2781738407145706": true, "3.0438248317324237": false, "3.875466976227463": false, "4.457974702180334": false}, "2.2781738407145706": {"2.806265145162949": false, "3.0183287469567968": false, "3.460425834366852": false, "3.8020736912045203": false, "4.57694700518965": false}}, {"1": {"1.1160124166521432": false, "1.3173472151950205": false, "1.5571234983934121": false, "2.2781738407145706": true, "3.0438248317324237": false, "3.875466976227463": false, "4.457974702180334": false}, "2.2781738407145706": {"2.806265145162949": false, "3.0183287469567968": false, "3.460425834366852": false, "3.8020736912045203": false, "4.57694700518965": false}}, {"1": {"1.1160124166521432": false, "1.3173472151950205": false, "1.5571234983934121": false, "2.2781738407145706": true, "3.0438248317324237": false, "3.875466976227463": false, "4.457974702180334": false}, "2.2781738407145706": {"2.806265145162949": false, "3.0183287469567968": false, "3.460425834366852": false, "3.8020736912045203": false, "4.57694700518965": false}}, {"1": {"1.1160124166521432": false, "1.3173472151950205": false, "1.5571234983934121": false, "2.2781738407145706": true, "3.0438248317324237": false, "3.875466976227463": false, "4.457974702180334": false}, "2.2781738407145706": {"2.806265145162949": false, "3.0183287469567968": false, "3.460425834366852": false, "3.8020736912045203": false, "4.57694700518965": false}}, {"1": {"1.1160124166521432": false, "1.3173472151950205": false, "1.5571234983934121": false, "2.2781738407145706": true, "3.0438248317324237": false, "3.875466976227463": false, "4.457974702180334": false}, "2.2781738407145706": {"2.806265145162949": false, "3.0183287469567968": false, "3.460425834366852": false, "3.8020736912045203": false, "4.57694700518965": false}}, {"1": {"1.1160124166521432": false, "1.3173472151950205": false, "1.5571234983934121": false, "2.2781738407145706": true, "3.0438248317324237": false, "3.875466976227463": false, "4.457974702180334": false}, "2.2781738407145706": {"2.806265145162949": false, "3.0183287469567968": false, "3.460425834366852": false, "3.8020736912045203": false, "4.57694700518965": false}}, {"1": {"1.1160124166521432": false, "1.3173472151950205": false, "1.5571234983934121": false, "2.2781738407145706": true, "3.0438248317324237": false, "3.875466976227463": false, "4.457974702180334": false}, "2.2781738407145706": {"2.806265145162949": false, "3.0183287469567968": false, "3.460425834366852": false, "3.8020736912045203": false, "4.57694700518965": false}}, {"1": {"1.1160124166521432": false, "1.3173472151950205": false, "1.5571234983934121": false, "2.2781738407145706": true, "3.0438248317324237": false, "3.875466976227463": false, "4.457974702180334": false}, "2.2781738407145706": {"2.806265145162949": false, "3.0183287469567968": false, "3.460425834366852": false, "3.8020736912045203": false, "4.57694700518965": false}}, {"1": {"1.1160124166521432": false, "1.3173472151950205": false, "1.5571234983934121": false, "2.2781738407145706": true, "3.0438248317324237": false, "3.875466976227463": false, "4.457974702180334": false}, "2.2781738407145706": {"2.806265145162949": false, "3.0183287469567968": false, "3.460425834366852": false, "3.8020736912045203": false, "4.57694700518965": false}}, {"1": {"1.1160124166521432": false, "1.3173472151950205": false, "1.5571234983934121": false, "2.2781738407145706": true, "3.0438248317324237": false, "3.875466976227463": false, "4.457974702180334": false}, "2.2781738407145706": {"2.806265145162949": false, "3.0183287469567968": false, "3.460425834366852": false, "3.8020736912045203": false, "4.57694700518965": false}}, {"1": {"1.1160124166521432": false, "1.3173472151950205": false, "1.5571234983934121": false, "2.2781738407145706": true, "3.0438248317324237": false, "3.875466976227463": false, "4.457974702180334": false}, "2.2781738407145706": {"2.806265145162949": false, "3.0183287469567968": false, "3.460425834366852": false, "3.8020736912045203": false, "4.57694700518965": false}}, {"1": {"1.1160124166521432": false, "1.3173472151950205": false, "1.5571234983934121": false, "2.2781738407145706": true, "3.0438248317324237": false, "3.875466976227463": false, "4.457974702180334": false}, "2.2781738407145706": {"2.806265145162949": false, "3.0183287469567968": false, "3.460425834366852": false, "3.8020736912045203": false, "4.57694700518965": false}}, {"1": {"1.1160124166521432": false, "1.3173472151950205": false, "1.5571234983934121": false, "2.2781738407145706": true, "3.0438248317324237": false, "3.875466976227463": false, "4.457974702180334": false}, "2.2781738407145706": {"2.806265145162949": false, "3.0183287469567968": false, "3.460425834366852": false, "3.8020736912045203": false, "4.57694700518965": false}}, {"1": {"1.1160124166521432": false, "1.3173472151950205": false, "1.5571234983934121": false, "2.2781738407145706": true, "3.0438248317324237": false, "3.875466976227463": false, "4.457974702180334": false}, "2.2781738407145706": {"2.806265145162949": false, "3.0183287469567968": false, "3.460425834366852": false, "3.8020736912045203": false, "4.57694700518965": false}}, {"1": {"1.1160124166521432": false, "1.3173472151950205": false, "1.5571234983934121": false, "2.2781738407145706": true, "3.0438248317324237": false, "3.875466976227463": false, "4.457974702180334": false}, "2.2781738407145706": {"2.806265145162949": false, "3.0183287469567968": false, "3.460425834366852": false, "3.8020736912045203": false, "4.57694700518965": false}}, {"1": {"1.1160124166521432": false, "1.3173472151950205": false, "1.5571234983934121": false, "2.2781738407145706": true, "3.0438248317324237": false, "3.875466976227463": false, "4.457974702180334": false}, "2.2781738407145706": {"2.806265145162949": false, "3.0183287469567968": false, "3.460425834366852": false, "3.8020736912045203": false, "4.57694700518965": false}}, {"1": {"1.1160124166521432": false, "1.3173472151950205": false, "1.5571234983934121": false, "2.2781738407145706": true, "3.0438248317324237": false, "3.875466976227463": false, "4.457974702180334": false}, "2.2781738407145706": {"2.806265145162949": false, "3.0183287469567968": false, "3.460425834366852": false, "3.8020736912045203": false, "4.57694700518965": false}}, {"1": {"0.040572687964904": false, "1.4860791839060803": false, "2.476381613412166": true, "2.620422586501418": true, "3.1678837001042153": true, "4.194441579392596": true, "4.241300971232662": false}, "2.476381613412166": {"3.1770313200314804": false, "4.22833140985528": false}, "2.620422586501418": {"2.9204215991626317": true, "4.484819357057573": false}, "2.9204215991626317": {"2.9926911122277384": true, "3.0386302571116017": false, "3.4057796959593216": false}, "2.9926911122277384": {"3.078959798879103": true, "4.31757267720022": true}, "3.078959798879103": {"3.745112978131361": true, "4.437125581395704": false, "4.730576366268757": false}, "3.745112978131361": {"3.9728735450725567": true, "4.260632679798819": false}, "3.9728735450725567": {"4.012053155286216": true}, "4.012053155286216": {}, "4.31757267720022": {"4.563299762094057": true}, "4.563299762094057": {"4.984939178222256": true}, "4.984939178222256": {}, "3.1678837001042153": {"3.4521137110902207": false, "4.250178524314852": true}, "4.250178524314852": {"4.8515538451949345": false, "4.886848999982991": false}, "4.194441579392596": {}}, {"1": {"0.040572687964904": false, "1.4860791839060803": false, "2.476381613412166": true, "2.620422586501418": true, "3.1678837001042153": true, "4.194441579392596": true, "4.241300971232662": false}, "2.476381613412166": {"3.1770313200314804": false, "4.22833140985528": false}, "2.620422586501418": {"2.9204215991626317": true, "4.484819357057573": false}, "2.9204215991626317": {"2.9926911122277384": true, "3.0386302571116017": false, "3.4057796959593216": false}, "2.9926911122277384": {"3.078959798879103": true, "4.31757267720022": true}, "3.078959798879103": {"3.745112978131361": true, "4.437125581395704": false, "4.730576366268757": false}, "3.745112978131361": {"3.9728735450725567": true, "4.260632679798819": false}, "3.9728735450725567": {"4.012053155286216": true}, "4.012053155286216": {}, "4.31757267720022": {"4.563299762094057": true}, "4.563299762094057": {"4.984939178222256": true}, "4.984939178222256": {}, "3.1678837001042153": {"3.4521137110902207": false, "4.250178524314852": true}, "4.250178524314852": {"4.8515538451949345": false, "4.886848999982991": false}, "4.194441579392596": {}}, {"1": {"0.040572687964904": false, "1.4860791839060803": false, "2.476381613412166": true, "2.620422586501418": true, "3.1678837001042153": true, "4.194441579392596": true, "4.241300971232662": false}, "2.476381613412166": {"3.1770313200314804": false, "4.22833140985528": false}, "2.620422586501418": {"2.9204215991626317": true, "4.484819357057573": false}, "2.9204215991626317": {"2.9926911122277384": true, "3.0386302571116017": false, "3.4057796959593216": false}, "2.9926911122277384": {"3.078959798879103": true, "4.31757267720022": true}, "3.078959798879103": {"3.745112978131361": true, "4.437125581395704": false, "4.730576366268757": false}, "3.745112978131361": {"3.9728735450725567": true, "4.260632679798819": false}, "3.9728735450725567": {"4.012053155286216": true}, "4.012053155286216": {}, "4.31757267720022": {"4.563299762094057": true}, "4.563299762094057": {"4.984939178222256": true}, "4.984939178222256": {}, "3.1678837001042153": {"3.4521137110902207": false, "4.250178524314852": true}, "4.250178524314852": {"4.8515538451949345": false, "4.886848999982991": false}, "4.194441579392596": {}}, {"1": {"0.040572687964904": false, "1.4860791839060803": false, "2.476381613412166": true, "2.620422586501418": true, "3.1678837001042153": true, "4.194441579392596": true, "4.241300971232662": false}, "2.476381613412166": {"3.1770313200314804": false, "4.22833140985528": false}, "2.620422586501418": {"2.9204215991626317": true, "4.484819357057573": false}, "2.9204215991626317": {"2.9926911122277384": true, "3.0386302571116017": false, "3.4057796959593216": false}, "2.9926911122277384": {"3.078959798879103": true, "4.31757267720022": true}, "3.078959798879103": {"3.745112978131361": true, "4.437125581395704": false, "4.730576366268757": false}, "3.745112978131361": {"3.9728735450725567": true, "4.260632679798819": false}, "3.9728735450725567": {"4.012053155286216": true}, "4.012053155286216": {}, "4.31757267720022": {"4.563299762094057": true}, "4.563299762094057": {"4.984939178222256": true}, "4.984939178222256": {}, "3.1678837001042153": {"3.4521137110902207": false, "4.250178524314852": true}, "4.250178524314852": {"4.8515538451949345": false, "4.886848999982991": false}, "4.194441579392596": {}}, {"1": {"0.040572687964904": false, "1.4860791839060803": false, "2.476381613412166": true, "2.620422586501418": true, "3.1678837001042153": true, "4.194441579392596": true, "4.241300971232662": false}, "2.476381613412166": {"3.1770313200314804": false, "4.22833140985528": false}, "2.620422586501418": {"2.9204215991626317": true, "4.484819357057573": false}, "2.9204215991626317": {"2.9926911122277384": true, "3.0386302571116017": false, "3.4057796959593216": false}, "2.9926911122277384": {"3.078959798879103": true, "4.31757267720022": true}, "3.078959798879103": {"3.745112978131361": true, "4.437125581395704": false, "4.730576366268757": false}, "3.745112978131361": {"3.9728735450725567": true, "4.260632679798819": false}, "3.9728735450725567": {"4.012053155286216": true}, "4.012053155286216": {}, "4.31757267720022": {"4.563299762094057": true}, "4.563299762094057": {"4.984939178222256": true}, "4.984939178222256": {}, "3.1678837001042153": {"3.4521137110902207": false, "4.250178524314852": true}, "4.250178524314852": {"4.8515538451949345": false, "4.886848999982991": false}, "4.194441579392596": {}}, {"1": {"0.040572687964904": false, "1.4860791839060803": false, "2.476381613412166": true, "2.620422586501418": true, "3.1678837001042153": true, "4.194441579392596": true, "4.241300971232662": false}, "2.476381613412166": {"3.1770313200314804": false, "4.22833140985528": false}, "2.620422586501418": {"2.9204215991626317": true, "4.484819357057573": false}, "2.9204215991626317": {"2.9926911122277384": true, "3.0386302571116017": false, "3.4057796959593216": false}, "2.9926911122277384": {"3.078959798879103": true, "4.31757267720022": true}, "3.078959798879103": {"3.745112978131361": true, "4.437125581395704": false, "4.730576366268757": false}, "3.745112978131361": {"3.9728735450725567": true, "4.260632679798819": false}, "3.9728735450725567": {"4.012053155286216": true}, "4.012053155286216": {}, "4.31757267720022": {"4.563299762094057": true}, "4.563299762094057": {"4.984939178222256": true}, "4.984939178222256": {}, "3.1678837001042153": {"3.4521137110902207": false, "4.250178524314852": true}, "4.250178524314852": {"4.8515538451949345": false, "4.886848999982991": false}, "4.194441579392596": {}}, {"1": {"0.040572687964904": false, "1.4860791839060803": false, "2.476381613412166": true, "2.620422586501418": true, "3.1678837001042153": true, "4.194441579392596": true, "4.241300971232662": false}, "2.476381613412166": {"3.1770313200314804": false, "4.22833140985528": false}, "2.620422586501418": {"2.9204215991626317": true, "4.484819357057573": false}, "2.9204215991626317": {"2.9926911122277384": true, "3.0386302571116017": false, "3.4057796959593216": false}, "2.9926911122277384": {"3.078959798879103": true, "4.31757267720022": true}, "3.078959798879103": {"3.745112978131361": true, "4.437125581395704": false, "4.730576366268757": false}, "3.745112978131361": {"3.9728735450725567": true, "4.260632679798819": false}, "3.9728735450725567": {"4.012053155286216": true}, "4.012053155286216": {}, "4.31757267720022": {"4.563299762094057": true}, "4.563299762094057": {"4.984939178222256": true}, "4.984939178222256": {}, "3.1678837001042153": {"3.4521137110902207": false, "4.250178524314852": true}, "4.250178524314852": {"4.8515538451949345": false, "4.886848999982991": false}, "4.194441579392596": {}}, {"1": {"0.040572687964904": false, "1.4860791839060803": false, "2.476381613412166": true, "2.620422586501418": true, "3.1678837001042153": true, "4.194441579392596": true, "4.241300971232662": false}, "2.476381613412166": {"3.1770313200314804": false, "4.22833140985528": false}, "2.620422586501418": {"2.9204215991626317": true, "4.484819357057573": false}, "2.9204215991626317": {"2.9926911122277384": true, "3.0386302571116017": false, "3.4057796959593216": false}, "2.9926911122277384": {"3.078959798879103": true, "4.31757267720022": true}, "3.078959798879103": {"3.745112978131361": true, "4.437125581395704": false, "4.730576366268757": false}, "3.745112978131361": {"3.9728735450725567": true, "4.260632679798819": false}, "3.9728735450725567": {"4.012053155286216": true}, "4.012053155286216": {}, "4.31757267720022": {"4.563299762094057": true}, "4.563299762094057": {"4.984939178222256": true}, "4.984939178222256": {}, "3.1678837001042153": {"3.4521137110902207": false, "4.250178524314852": true}, "4.250178524314852": {"4.8515538451949345": false, "4.886848999982991": false}, "4.194441579392596": {}}, {"1": {"0.040572687964904": false, "1.4860791839060803": false, "2.476381613412166": true, "2.620422586501418": true, "3.1678837001042153": true, "4.194441579392596": true, "4.241300971232662": false}, "2.476381613412166": {"3.1770313200314804": false, "4.22833140985528": false}, "2.620422586501418": {"2.9204215991626317": true, "4.484819357057573": false}, "2.9204215991626317": {"2.9926911122277384": true, "3.0386302571116017": false, "3.4057796959593216": false}, "2.9926911122277384": {"3.078959798879103": true, "4.31757267720022": true}, "3.078959798879103": {"3.745112978131361": true, "4.437125581395704": false, "4.730576366268757": false}, "3.745112978131361": {"3.9728735450725567": true, "4.260632679798819": false}, "3.9728735450725567": {"4.012053155286216": true}, "4.012053155286216": {}, "4.31757267720022": {"4.563299762094057": true}, "4.563299762094057": {"4.984939178222256": true}, "4.984939178222256": {}, "3.1678837001042153": {"3.4521137110902207": false, "4.250178524314852": true}, "4.250178524314852": {"4.8515538451949345": false, "4.886848999982991": false}, "4.194441579392596": {}}, {"1": {"0.040572687964904": false, "1.4860791839060803": false, "2.476381613412166": true, "2.620422586501418": true, "3.1678837001042153": true, "4.194441579392596": true, "4.241300971232662": false}, "2.476381613412166": {"3.1770313200314804": false, "4.22833140985528": false}, "2.620422586501418": {"2.9204215991626317": true, "4.484819357057573": false}, "2.9204215991626317": {"2.9926911122277384": true, "3.0386302571116017": false, "3.4057796959593216": false}, "2.9926911122277384": {"3.078959798879103": true, "4.31757267720022": true}, "3.078959798879103": {"3.745112978131361": true, "4.437125581395704": false, "4.730576366268757": false}, "3.745112978131361": {"3.9728735450725567": true, "4.260632679798819": false}, "3.9728735450725567": {"4.012053155286216": true}, "4.012053155286216": {}, "4.31757267720022": {"4.563299762094057": true}, "4.563299762094057": {"4.984939178222256": true}, "4.984939178222256": {}, "3.1678837001042153": {"3.4521137110902207": false, "4.250178524314852": true}, "4.250178524314852": {"4.8515538451949345": false, "4.886848999982991": false}, "4.194441579392596": {}}, {"1": {"0.040572687964904": false, "1.4860791839060803": false, "2.476381613412166": true, "2.620422586501418": true, "3.1678837001042153": true, "4.194441579392596": true, "4.241300971232662": false}, "2.476381613412166": {"3.1770313200314804": false, "4.22833140985528": false}, "2.620422586501418": {"2.9204215991626317": true, "4.484819357057573": false}, "2.9204215991626317": {"2.9926911122277384": true, "3.0386302571116017": false, "3.4057796959593216": false}, "2.9926911122277384": {"3.078959798879103": true, "4.31757267720022": true}, "3.078959798879103": {"3.745112978131361": true, "4.437125581395704": false, "4.730576366268757": false}, "3.745112978131361": {"3.9728735450725567": true, "4.260632679798819": false}, "3.9728735450725567": {"4.012053155286216": true}, "4.012053155286216": {}, "4.31757267720022": {"4.563299762094057": true}, "4.563299762094057": {"4.984939178222256": true}, "4.984939178222256": {}, "3.1678837001042153": {"3.4521137110902207": false, "4.250178524314852": true}, "4.250178524314852": {"4.8515538451949345": false, "4.886848999982991": false}, "4.194441579392596": {}}, {"1": {"0.040572687964904": false, "1.4860791839060803": false, "2.476381613412166": true, "2.620422586501418": true, "3.1678837001042153": true, "4.194441579392596": true, "4.241300971232662": false}, "2.476381613412166": {"3.1770313200314804": false, "4.22833140985528": false}, "2.620422586501418": {"2.9204215991626317": true, "4.484819357057573": false}, "2.9204215991626317": {"2.9926911122277384": true, "3.0386302571116017": false, "3.4057796959593216": false}, "2.9926911122277384": {"3.078959798879103": true, "4.31757267720022": true}, "3.078959798879103": {"3.745112978131361": true, "4.437125581395704": false, "4.730576366268757": false}, "3.745112978131361": {"3.9728735450725567": true, "4.260632679798819": false}, "3.9728735450725567": {"4.012053155286216": true}, "4.012053155286216": {}, "4.31757267720022": {"4.563299762094057": true}, "4.563299762094057": {"4.984939178222256": true}, "4.984939178222256": {}, "3.1678837001042153": {"3.4521137110902207": false, "4.250178524314852": true}, "4.250178524314852": {"4.8515538451949345": false, "4.886848999982991": false}, "4.194441579392596": {}}, {"1": {"0.040572687964904": false, "1.4860791839060803": false, "2.476381613412166": true, "2.620422586501418": true, "3.1678837001042153": true, "4.194441579392596": true, "4.241300971232662": false}, "2.476381613412166": {"3.1770313200314804": false, "4.22833140985528": false}, "2.620422586501418": {"2.9204215991626317": true, "4.484819357057573": false}, "2.9204215991626317": {"2.9926911122277384": true, "3.0386302571116017": false, "3.4057796959593216": false}, "2.9926911122277384": {"3.078959798879103": true, "4.31757267720022": true}, "3.078959798879103": {"3.745112978131361": true, "4.437125581395704": false, "4.730576366268757": false}, "3.745112978131361": {"3.9728735450725567": true, "4.260632679798819": false}, "3.9728735450725567": {"4.012053155286216": true}, "4.012053155286216": {}, "4.31757267720022": {"4.563299762094057": true}, "4.563299762094057": {"4.984939178222256": true}, "4.984939178222256": {}, "3.1678837001042153": {"3.4521137110902207": false, "4.250178524314852": true}, "4.250178524314852": {"4.8515538451949345": false, "4.886848999982991": false}, "4.194441579392596": {}}, {"1": {"0.040572687964904": false, "1.4860791839060803": false, "2.476381613412166": true, "2.620422586501418": true, "3.1678837001042153": true, "4.194441579392596": true, "4.241300971232662": false}, "2.476381613412166": {"3.1770313200314804": false, "4.22833140985528": false}, "2.620422586501418": {"2.9204215991626317": true, "4.484819357057573": false}, "2.9204215991626317": {"2.9926911122277384": true, "3.0386302571116017": false, "3.4057796959593216": false}, "2.9926911122277384": {"3.078959798879103": true, "4.31757267720022": true}, "3.078959798879103": {"3.745112978131361": true, "4.437125581395704": false, "4.730576366268757": false}, "3.745112978131361": {"3.9728735450725567": true, "4.260632679798819": false}, "3.9728735450725567": {"4.012053155286216": true}, "4.012053155286216": {}, "4.31757267720022": {"4.563299762094057": true}, "4.563299762094057": {"4.984939178222256": true}, "4.984939178222256": {}, "3.1678837001042153": {"3.4521137110902207": false, "4.250178524314852": true}, "4.250178524314852": {"4.8515538451949345": false, "4.886848999982991": false}, "4.194441579392596": {}}, {"1": {"0.040572687964904": false, "1.4860791839060803": false, "2.476381613412166": true, "2.620422586501418": true, "3.1678837001042153": true, "4.194441579392596": true, "4.241300971232662": false}, "2.476381613412166": {"3.1770313200314804": false, "4.22833140985528": false}, "2.620422586501418": {"2.9204215991626317": true, "4.484819357057573": false}, "2.9204215991626317": {"2.9926911122277384": true, "3.0386302571116017": false, "3.4057796959593216": false}, "2.9926911122277384": {"3.078959798879103": true, "4.31757267720022": true}, "3.078959798879103": {"3.745112978131361": true, "4.437125581395704": false, "4.730576366268757": false}, "3.745112978131361": {"3.9728735450725567": true, "4.260632679798819": false}, "3.9728735450725567": {"4.012053155286216": true}, "4.012053155286216": {}, "4.31757267720022": {"4.563299762094057": true}, "4.563299762094057": {"4.984939178222256": true}, "4.984939178222256": {}, "3.1678837001042153": {"3.4521137110902207": false, "4.250178524314852": true}, "4.250178524314852": {"4.8515538451949345": false, "4.886848999982991": false}, "4.194441579392596": {}}, {"1": {"0.040572687964904": false, "1.4860791839060803": false, "2.476381613412166": true, "2.620422586501418": true, "3.1678837001042153": true, "4.194441579392596": true, "4.241300971232662": false}, "2.476381613412166": {"3.1770313200314804": false, "4.22833140985528": false}, "2.620422586501418": {"2.9204215991626317": true, "4.484819357057573": false}, "2.9204215991626317": {"2.9926911122277384": true, "3.0386302571116017": false, "3.4057796959593216": false}, "2.9926911122277384": {"3.078959798879103": true, "4.31757267720022": true}, "3.078959798879103": {"3.745112978131361": true, "4.437125581395704": false, "4.730576366268757": false}, "3.745112978131361": {"3.9728735450725567": true, "4.260632679798819": false}, "3.9728735450725567": {"4.012053155286216": true}, "4.012053155286216": {}, "4.31757267720022": {"4.563299762094057": true}, "4.563299762094057": {"4.984939178222256": true}, "4.984939178222256": {}, "3.1678837001042153": {"3.4521137110902207": false, "4.250178524314852": true}, "4.250178524314852": {"4.8515538451949345": false, "4.886848999982991": false}, "4.194441579392596": {}}, {"1": {"0.040572687964904": false, "1.4860791839060803": false, "2.476381613412166": true, "2.620422586501418": true, "3.1678837001042153": true, "4.194441579392596": true, "4.241300971232662": false}, "2.476381613412166": {"3.1770313200314804": false, "4.22833140985528": false}, "2.620422586501418": {"2.9204215991626317": true, "4.484819357057573": false}, "2.9204215991626317": {"2.9926911122277384": true, "3.0386302571116017": false, "3.4057796959593216": false}, "2.9926911122277384": {"3.078959798879103": true, "4.31757267720022": true}, "3.078959798879103": {"3.745112978131361": true, "4.437125581395704": false, "4.730576366268757": false}, "3.745112978131361": {"3.9728735450725567": true, "4.260632679798819": false}, "3.9728735450725567": {"4.012053155286216": true}, "4.012053155286216": {}, "4.31757267720022": {"4.563299762094057": true}, "4.563299762094057": {"4.984939178222256": true}, "4.984939178222256": {}, "3.1678837001042153": {"3.4521137110902207": false, "4.250178524314852": true}, "4.250178524314852": {"4.8515538451949345": false, "4.886848999982991": false}, "4.194441579392596": {}}, {"1": {"0.040572687964904": false, "1.4860791839060803": false, "2.476381613412166": true, "2.620422586501418": true, "3.1678837001042153": true, "4.194441579392596": true, "4.241300971232662": false}, "2.476381613412166": {"3.1770313200314804": false, "4.22833140985528": false}, "2.620422586501418": {"2.9204215991626317": true, "4.484819357057573": false}, "2.9204215991626317": {"2.9926911122277384": true, "3.0386302571116017": false, "3.4057796959593216": false}, "2.9926911122277384": {"3.078959798879103": true, "4.31757267720022": true}, "3.078959798879103": {"3.745112978131361": true, "4.437125581395704": false, "4.730576366268757": false}, "3.745112978131361": {"3.9728735450725567": true, "4.260632679798819": false}, "3.9728735450725567": {"4.012053155286216": true}, "4.012053155286216": {}, "4.31757267720022": {"4.563299762094057": true}, "4.563299762094057": {"4.984939178222256": true}, "4.984939178222256": {}, "3.1678837001042153": {"3.4521137110902207": false, "4.250178524314852": true}, "4.250178524314852": {"4.8515538451949345": false, "4.886848999982991": false}, "4.194441579392596": {}}, {"1": {"0.040572687964904": false, "1.4860791839060803": false, "2.476381613412166": true, "2.620422586501418": true, "3.1678837001042153": true, "4.194441579392596": true, "4.241300971232662": false}, "2.476381613412166": {"3.1770313200314804": false, "4.22833140985528": false}, "2.620422586501418": {"2.9204215991626317": true, "4.484819357057573": false}, "2.9204215991626317": {"2.9926911122277384": true, "3.0386302571116017": false, "3.4057796959593216": false}, "2.9926911122277384": {"3.078959798879103": true, "4.31757267720022": true}, "3.078959798879103": {"3.745112978131361": true, "4.437125581395704": false, "4.730576366268757": false}, "3.745112978131361": {"3.9728735450725567": true, "4.260632679798819": false}, "3.9728735450725567": {"4.012053155286216": true}, "4.012053155286216": {}, "4.31757267720022": {"4.563299762094057": true}, "4.563299762094057": {"4.984939178222256": true}, "4.984939178222256": {}, "3.1678837001042153": {"3.4521137110902207": false, "4.250178524314852": true}, "4.250178524314852": {"4.8515538451949345": false, "4.886848999982991": false}, "4.194441579392596": {}}, {"1": {"0.040572687964904": false, "1.4860791839060803": false, "2.476381613412166": true, "2.620422586501418": true, "3.1678837001042153": true, "4.194441579392596": true, "4.241300971232662": false}, "2.476381613412166": {"3.1770313200314804": false, "4.22833140985528": false}, "2.620422586501418": {"2.9204215991626317": true, "4.484819357057573": false}, "2.9204215991626317": {"2.9926911122277384": true, "3.0386302571116017": false, "3.4057796959593216": false}, "2.9926911122277384": {"3.078959798879103": true, "4.31757267720022": true}, "3.078959798879103": {"3.745112978131361": true, "4.437125581395704": false, "4.730576366268757": false}, "3.745112978131361": {"3.9728735450725567": true, "4.260632679798819": false}, "3.9728735450725567": {"4.012053155286216": true}, "4.012053155286216": {}, "4.31757267720022": {"4.563299762094057": true}, "4.563299762094057": {"4.984939178222256": true}, "4.984939178222256": {}, "3.1678837001042153": {"3.4521137110902207": false, "4.250178524314852": true}, "4.250178524314852": {"4.8515538451949345": false, "4.886848999982991": false}, "4.194441579392596": {}}, {"1": {"0.040572687964904": false, "1.4860791839060803": false, "2.476381613412166": true, "2.620422586501418": true, "3.1678837001042153": true, "4.194441579392596": true, "4.241300971232662": false}, "2.476381613412166": {"3.1770313200314804": false, "4.22833140985528": false}, "2.620422586501418": {"2.9204215991626317": true, "4.484819357057573": false}, "2.9204215991626317": {"2.9926911122277384": true, "3.0386302571116017": false, "3.4057796959593216": false}, "2.9926911122277384": {"3.078959798879103": true, "4.31757267720022": true}, "3.078959798879103": {"3.745112978131361": true, "4.437125581395704": false, "4.730576366268757": false}, "3.745112978131361": {"3.9728735450725567": true, "4.260632679798819": false}, "3.9728735450725567": {"4.012053155286216": true}, "4.012053155286216": {}, "4.31757267720022": {"4.563299762094057": true}, "4.563299762094057": {"4.984939178222256": true}, "4.984939178222256": {}, "3.1678837001042153": {"3.4521137110902207": false, "4.250178524314852": true}, "4.250178524314852": {"4.8515538451949345": false, "4.886848999982991": false}, "4.194441579392596": {}}, {"1": {"0.040572687964904": false, "1.4860791839060803": false, "2.476381613412166": true, "2.620422586501418": true, "3.1678837001042153": true, "4.194441579392596": true, "4.241300971232662": false}, "2.476381613412166": {"3.1770313200314804": false, "4.22833140985528": false}, "2.620422586501418": {"2.9204215991626317": true, "4.484819357057573": false}, "2.9204215991626317": {"2.9926911122277384": true, "3.0386302571116017": false, "3.4057796959593216": false}, "2.9926911122277384": {"3.078959798879103": true, "4.31757267720022": true}, "3.078959798879103": {"3.745112978131361": true, "4.437125581395704": false, "4.730576366268757": false}, "3.745112978131361": {"3.9728735450725567": true, "4.260632679798819": false}, "3.9728735450725567": {"4.012053155286216": true}, "4.012053155286216": {}, "4.31757267720022": {"4.563299762094057": true}, "4.563299762094057": {"4.984939178222256": true}, "4.984939178222256": {}, "3.1678837001042153": {"3.4521137110902207": false, "4.250178524314852": true}, "4.250178524314852": {"4.8515538451949345": false, "4.886848999982991": false}, "4.194441579392596": {}}, {"1": {"0.040572687964904": false, "1.4860791839060803": false, "2.476381613412166": true, "2.620422586501418": true, "3.1678837001042153": true, "4.194441579392596": true, "4.241300971232662": false}, "2.476381613412166": {"3.1770313200314804": false, "4.22833140985528": false}, "2.620422586501418": {"2.9204215991626317": true, "4.484819357057573": false}, "2.9204215991626317": {"2.9926911122277384": true, "3.0386302571116017": false, "3.4057796959593216": false}, "2.9926911122277384": {"3.078959798879103": true, "4.31757267720022": true}, "3.078959798879103": {"3.745112978131361": true, "4.437125581395704": false, "4.730576366268757": false}, "3.745112978131361": {"3.9728735450725567": true, "4.260632679798819": false}, "3.9728735450725567": {"4.012053155286216": true}, "4.012053155286216": {}, "4.31757267720022": {"4.563299762094057": true}, "4.563299762094057": {"4.984939178222256": true}, "4.984939178222256": {}, "3.1678837001042153": {"3.4521137110902207": false, "4.250178524314852": true}, "4.250178524314852": {"4.8515538451949345": false, "4.886848999982991": false}, "4.194441579392596": {}}, {"1": {"0.040572687964904": false, "1.4860791839060803": false, "2.476381613412166": true, "2.620422586501418": true, "3.1678837001042153": true, "4.194441579392596": true, "4.241300971232662": false}, "2.476381613412166": {"3.1770313200314804": false, "4.22833140985528": false}, "2.620422586501418": {"2.9204215991626317": true, "4.484819357057573": false}, "2.9204215991626317": {"2.9926911122277384": true, "3.0386302571116017": false, "3.4057796959593216": false}, "2.9926911122277384": {"3.078959798879103": true, "4.31757267720022": true}, "3.078959798879103": {"3.745112978131361": true, "4.437125581395704": false, "4.730576366268757": false}, "3.745112978131361": {"3.9728735450725567": true, "4.260632679798819": false}, "3.9728735450725567": {"4.012053155286216": true}, "4.012053155286216": {}, "4.31757267720022": {"4.563299762094057": true}, "4.563299762094057": {"4.984939178222256": true}, "4.984939178222256": {}, "3.1678837001042153": {"3.4521137110902207": false, "4.250178524314852": true}, "4.250178524314852": {"4.8515538451949345": false, "4.886848999982991": false}, "4.194441579392596": {}}, {"1": {"0.040572687964904": false, "1.4860791839060803": false, "2.476381613412166": true, "2.620422586501418": true, "3.1678837001042153": true, "4.194441579392596": true, "4.241300971232662": false}, "2.476381613412166": {"3.1770313200314804": false, "4.22833140985528": false}, "2.620422586501418": {"2.9204215991626317": true, "4.484819357057573": false}, "2.9204215991626317": {"2.9926911122277384": true, "3.0386302571116017": false, "3.4057796959593216": false}, "2.9926911122277384": {"3.078959798879103": true, "4.31757267720022": true}, "3.078959798879103": {"3.745112978131361": true, "4.437125581395704": false, "4.730576366268757": false}, "3.745112978131361": {"3.9728735450725567": true, "4.260632679798819": false}, "3.9728735450725567": {"4.012053155286216": true}, "4.012053155286216": {}, "4.31757267720022": {"4.563299762094057": true}, "4.563299762094057": {"4.984939178222256": true}, "4.984939178222256": {}, "3.1678837001042153": {"3.4521137110902207": false, "4.250178524314852": true}, "4.250178524314852": {"4.8515538451949345": false, "4.886848999982991": false}, "4.194441579392596": {}}, {"1": {"0.040572687964904": false, "1.4860791839060803": false, "2.476381613412166": true, "2.620422586501418": true, "3.1678837001042153": true, "4.194441579392596": true, "4.241300971232662": false}, "2.476381613412166": {"3.1770313200314804": false, "4.22833140985528": false}, "2.620422586501418": {"2.9204215991626317": true, "4.484819357057573": false}, "2.9204215991626317": {"2.9926911122277384": true, "3.0386302571116017": false, "3.4057796959593216": false}, "2.9926911122277384": {"3.078959798879103": true, "4.31757267720022": true}, "3.078959798879103": {"3.745112978131361": true, "4.437125581395704": false, "4.730576366268757": false}, "3.745112978131361": {"3.9728735450725567": true, "4.260632679798819": false}, "3.9728735450725567": {"4.012053155286216": true}, "4.012053155286216": {}, "4.31757267720022": {"4.563299762094057": true}, "4.563299762094057": {"4.984939178222256": true}, "4.984939178222256": {}, "3.1678837001042153": {"3.4521137110902207": false, "4.250178524314852": true}, "4.250178524314852": {"4.8515538451949345": false, "4.886848999982991": false}, "4.194441579392596": {}}, {"1": {"0.040572687964904": false, "1.4860791839060803": false, "2.476381613412166": true, "2.620422586501418": true, "3.1678837001042153": true, "4.194441579392596": true, "4.241300971232662": false}, "2.476381613412166": {"3.1770313200314804": false, "4.22833140985528": false}, "2.620422586501418": {"2.9204215991626317": true, "4.484819357057573": false}, "2.9204215991626317": {"2.9926911122277384": true, "3.0386302571116017": false, "3.4057796959593216": false}, "2.9926911122277384": {"3.078959798879103": true, "4.31757267720022": true}, "3.078959798879103": {"3.745112978131361": true, "4.437125581395704": false, "4.730576366268757": false}, "3.745112978131361": {"3.9728735450725567": true, "4.260632679798819": false}, "3.9728735450725567": {"4.012053155286216": true}, "4.012053155286216": {}, "4.31757267720022": {"4.563299762094057": true}, "4.563299762094057": {"4.984939178222256": true}, "4.984939178222256": {}, "3.1678837001042153": {"3.4521137110902207": false, "4.250178524314852": true}, "4.250178524314852": {"4.8515538451949345": false, "4.886848999982991": false}, "4.194441579392596": {}}, {"1": {"0.040572687964904": false, "1.4860791839060803": false, "2.476381613412166": true, "2.620422586501418": true, "3.1678837001042153": true, "4.194441579392596": true, "4.241300971232662": false}, "2.476381613412166": {"3.1770313200314804": false, "4.22833140985528": false}, "2.620422586501418": {"2.9204215991626317": true, "4.484819357057573": false}, "2.9204215991626317": {"2.9926911122277384": true, "3.0386302571116017": false, "3.4057796959593216": false}, "2.9926911122277384": {"3.078959798879103": true, "4.31757267720022": true}, "3.078959798879103": {"3.745112978131361": true, "4.437125581395704": false, "4.730576366268757": false}, "3.745112978131361": {"3.9728735450725567": true, "4.260632679798819": false}, "3.9728735450725567": {"4.012053155286216": true}, "4.012053155286216": {}, "4.31757267720022": {"4.563299762094057": true}, "4.563299762094057": {"4.984939178222256": true}, "4.984939178222256": {}, "3.1678837001042153": {"3.4521137110902207": false, "4.250178524314852": true}, "4.250178524314852": {"4.8515538451949345": false, "4.886848999982991": false}, "4.194441579392596": {}}, {"1": {"0.040572687964904": false, "1.4860791839060803": false, "2.476381613412166": true, "2.620422586501418": true, "3.1678837001042153": true, "4.194441579392596": true, "4.241300971232662": false}, "2.476381613412166": {"3.1770313200314804": false, "4.22833140985528": false}, "2.620422586501418": {"2.9204215991626317": true, "4.484819357057573": false}, "2.9204215991626317": {"2.9926911122277384": true, "3.0386302571116017": false, "3.4057796959593216": false}, "2.9926911122277384": {"3.078959798879103": true, "4.31757267720022": true}, "3.078959798879103": {"3.745112978131361": true, "4.437125581395704": false, "4.730576366268757": false}, "3.745112978131361": {"3.9728735450725567": true, "4.260632679798819": false}, "3.9728735450725567": {"4.012053155286216": true}, "4.012053155286216": {}, "4.31757267720022": {"4.563299762094057": true}, "4.563299762094057": {"4.984939178222256": true}, "4.984939178222256": {}, "3.1678837001042153": {"3.4521137110902207": false, "4.250178524314852": true}, "4.250178524314852": {"4.8515538451949345": false, "4.886848999982991": false}, "4.194441579392596": {}}, {"1": {"0.040572687964904": false, "1.4860791839060803": false, "2.476381613412166": true, "2.620422586501418": true, "3.1678837001042153": true, "4.194441579392596": true, "4.241300971232662": false}, "2.476381613412166": {"3.1770313200314804": false, "4.22833140985528": false}, "2.620422586501418": {"2.9204215991626317": true, "4.484819357057573": false}, "2.9204215991626317": {"2.9926911122277384": true, "3.0386302571116017": false, "3.4057796959593216": false}, "2.9926911122277384": {"3.078959798879103": true, "4.31757267720022": true}, "3.078959798879103": {"3.745112978131361": true, "4.437125581395704": false, "4.730576366268757": false}, "3.745112978131361": {"3.9728735450725567": true, "4.260632679798819": false}, "3.9728735450725567": {"4.012053155286216": true}, "4.012053155286216": {}, "4.31757267720022": {"4.563299762094057": true}, "4.563299762094057": {"4.984939178222256": true}, "4.984939178222256": {}, "3.1678837001042153": {"3.4521137110902207": false, "4.250178524314852": true}, "4.250178524314852": {"4.8515538451949345": false, "4.886848999982991": false}, "4.194441579392596": {}}, {"1": {"0.040572687964904": false, "1.4860791839060803": false, "2.476381613412166": true, "2.620422586501418": true, "3.1678837001042153": true, "4.194441579392596": true, "4.241300971232662": false}, "2.476381613412166": {"3.1770313200314804": false, "4.22833140985528": false}, "2.620422586501418": {"2.9204215991626317": true, "4.484819357057573": false}, "2.9204215991626317": {"2.9926911122277384": true, "3.0386302571116017": false, "3.4057796959593216": false}, "2.9926911122277384": {"3.078959798879103": true, "4.31757267720022": true}, "3.078959798879103": {"3.745112978131361": true, "4.437125581395704": false, "4.730576366268757": false}, "3.745112978131361": {"3.9728735450725567": true, "4.260632679798819": false}, "3.9728735450725567": {"4.012053155286216": true}, "4.012053155286216": {}, "4.31757267720022": {"4.563299762094057": true}, "4.563299762094057": {"4.984939178222256": true}, "4.984939178222256": {}, "3.1678837001042153": {"3.4521137110902207": false, "4.250178524314852": true}, "4.250178524314852": {"4.8515538451949345": false, "4.886848999982991": false}, "4.194441579392596": {}}, {"1": {"0.040572687964904": false, "1.4860791839060803": false, "2.476381613412166": true, "2.620422586501418": true, "3.1678837001042153": true, "4.194441579392596": true, "4.241300971232662": false}, "2.476381613412166": {"3.1770313200314804": false, "4.22833140985528": false}, "2.620422586501418": {"2.9204215991626317": true, "4.484819357057573": false}, "2.9204215991626317": {"2.9926911122277384": true, "3.0386302571116017": false, "3.4057796959593216": false}, "2.9926911122277384": {"3.078959798879103": true, "4.31757267720022": true}, "3.078959798879103": {"3.745112978131361": true, "4.437125581395704": false, "4.730576366268757": false}, "3.745112978131361": {"3.9728735450725567": true, "4.260632679798819": false}, "3.9728735450725567": {"4.012053155286216": true}, "4.012053155286216": {}, "4.31757267720022": {"4.563299762094057": true}, "4.563299762094057": {"4.984939178222256": true}, "4.984939178222256": {}, "3.1678837001042153": {"3.4521137110902207": false, "4.250178524314852": true}, "4.250178524314852": {"4.8515538451949345": false, "4.886848999982991": false}, "4.194441579392596": {}}, {"1": {"0.040572687964904": false, "1.4860791839060803": false, "2.476381613412166": true, "2.620422586501418": true, "3.1678837001042153": true, "4.194441579392596": true, "4.241300971232662": false}, "2.476381613412166": {"3.1770313200314804": false, "4.22833140985528": false}, "2.620422586501418": {"2.9204215991626317": true, "4.484819357057573": false}, "2.9204215991626317": {"2.9926911122277384": true, "3.0386302571116017": false, "3.4057796959593216": false}, "2.9926911122277384": {"3.078959798879103": true, "4.31757267720022": true}, "3.078959798879103": {"3.745112978131361": true, "4.437125581395704": false, "4.730576366268757": false}, "3.745112978131361": {"3.9728735450725567": true, "4.260632679798819": false}, "3.9728735450725567": {"4.012053155286216": true}, "4.012053155286216": {}, "4.31757267720022": {"4.563299762094057": true}, "4.563299762094057": {"4.984939178222256": true}, "4.984939178222256": {}, "3.1678837001042153": {"3.4521137110902207": false, "4.250178524314852": true}, "4.250178524314852": {"4.8515538451949345": false, "4.886848999982991": false}, "4.194441579392596": {}}, {"1": {"0.040572687964904": false, "1.4860791839060803": false, "2.476381613412166": true, "2.620422586501418": true, "3.1678837001042153": true, "4.194441579392596": true, "4.241300971232662": false}, "2.476381613412166": {"3.1770313200314804": false, "4.22833140985528": false}, "2.620422586501418": {"2.9204215991626317": true, "4.484819357057573": false}, "2.9204215991626317": {"2.9926911122277384": true, "3.0386302571116017": false, "3.4057796959593216": false}, "2.9926911122277384": {"3.078959798879103": true, "4.31757267720022": true}, "3.078959798879103": {"3.745112978131361": true, "4.437125581395704": false, "4.730576366268757": false}, "3.745112978131361": {"3.9728735450725567": true, "4.260632679798819": false}, "3.9728735450725567": {"4.012053155286216": true}, "4.012053155286216": {}, "4.31757267720022": {"4.563299762094057": true}, "4.563299762094057": {"4.984939178222256": true}, "4.984939178222256": {}, "3.1678837001042153": {"3.4521137110902207": false, "4.250178524314852": true}, "4.250178524314852": {"4.8515538451949345": false, "4.886848999982991": false}, "4.194441579392596": {}}, {"1": {"0.040572687964904": false, "1.4860791839060803": false, "2.476381613412166": true, "2.620422586501418": true, "3.1678837001042153": true, "4.194441579392596": true, "4.241300971232662": false}, "2.476381613412166": {"3.1770313200314804": false, "4.22833140985528": false}, "2.620422586501418": {"2.9204215991626317": true, "4.484819357057573": false}, "2.9204215991626317": {"2.9926911122277384": true, "3.0386302571116017": false, "3.4057796959593216": false}, "2.9926911122277384": {"3.078959798879103": true, "4.31757267720022": true}, "3.078959798879103": {"3.745112978131361": true, "4.437125581395704": false, "4.730576366268757": false}, "3.745112978131361": {"3.9728735450725567": true, "4.260632679798819": false}, "3.9728735450725567": {"4.012053155286216": true}, "4.012053155286216": {}, "4.31757267720022": {"4.563299762094057": true}, "4.563299762094057": {"4.984939178222256": true}, "4.984939178222256": {}, "3.1678837001042153": {"3.4521137110902207": false, "4.250178524314852": true}, "4.250178524314852": {"4.8515538451949345": false, "4.886848999982991": false}, "4.194441579392596": {}}, {"1": {"0.040572687964904": false, "1.4860791839060803": false, "2.476381613412166": true, "2.620422586501418": true, "3.1678837001042153": true, "4.194441579392596": true, "4.241300971232662": false}, "2.476381613412166": {"3.1770313200314804": false, "4.22833140985528": false}, "2.620422586501418": {"2.9204215991626317": true, "4.484819357057573": false}, "2.9204215991626317": {"2.9926911122277384": true, "3.0386302571116017": false, "3.4057796959593216": false}, "2.9926911122277384": {"3.078959798879103": true, "4.31757267720022": true}, "3.078959798879103": {"3.745112978131361": true, "4.437125581395704": false, "4.730576366268757": false}, "3.745112978131361": {"3.9728735450725567": true, "4.260632679798819": false}, "3.9728735450725567": {"4.012053155286216": true}, "4.012053155286216": {}, "4.31757267720022": {"4.563299762094057": true}, "4.563299762094057": {"4.984939178222256": true}, "4.984939178222256": {}, "3.1678837001042153": {"3.4521137110902207": false, "4.250178524314852": true}, "4.250178524314852": {"4.8515538451949345": false, "4.886848999982991": false}, "4.194441579392596": {}}, {"1": {"0.040572687964904": false, "1.4860791839060803": false, "2.476381613412166": true, "2.620422586501418": true, "3.1678837001042153": true, "4.194441579392596": true, "4.241300971232662": false}, "2.476381613412166": {"3.1770313200314804": false, "4.22833140985528": false}, "2.620422586501418": {"2.9204215991626317": true, "4.484819357057573": false}, "2.9204215991626317": {"2.9926911122277384": true, "3.0386302571116017": false, "3.4057796959593216": false}, "2.9926911122277384": {"3.078959798879103": true, "4.31757267720022": true}, "3.078959798879103": {"3.745112978131361": true, "4.437125581395704": false, "4.730576366268757": false}, "3.745112978131361": {"3.9728735450725567": true, "4.260632679798819": false}, "3.9728735450725567": {"4.012053155286216": true}, "4.012053155286216": {}, "4.31757267720022": {"4.563299762094057": true}, "4.563299762094057": {"4.984939178222256": true}, "4.984939178222256": {}, "3.1678837001042153": {"3.4521137110902207": false, "4.250178524314852": true}, "4.250178524314852": {"4.8515538451949345": false, "4.886848999982991": false}, "4.194441579392596": {}}, {"1": {"0.040572687964904": false, "1.4860791839060803": false, "2.476381613412166": true, "2.620422586501418": true, "3.1678837001042153": true, "4.194441579392596": true, "4.241300971232662": false}, "2.476381613412166": {"3.1770313200314804": false, "4.22833140985528": false}, "2.620422586501418": {"2.9204215991626317": true, "4.484819357057573": false}, "2.9204215991626317": {"2.9926911122277384": true, "3.0386302571116017": false, "3.4057796959593216": false}, "2.9926911122277384": {"3.078959798879103": true, "4.31757267720022": true}, "3.078959798879103": {"3.745112978131361": true, "4.437125581395704": false, "4.730576366268757": false}, "3.745112978131361": {"3.9728735450725567": true, "4.260632679798819": false}, "3.9728735450725567": {"4.012053155286216": true}, "4.012053155286216": {}, "4.31757267720022": {"4.563299762094057": true}, "4.563299762094057": {"4.984939178222256": true}, "4.984939178222256": {}, "3.1678837001042153": {"3.4521137110902207": false, "4.250178524314852": true}, "4.250178524314852": {"4.8515538451949345": false, "4.886848999982991": false}, "4.194441579392596": {}}, {"1": {"0.040572687964904": false, "1.4860791839060803": false, "2.476381613412166": true, "2.620422586501418": true, "3.1678837001042153": true, "4.194441579392596": true, "4.241300971232662": false}, "2.476381613412166": {"3.1770313200314804": false, "4.22833140985528": false}, "2.620422586501418": {"2.9204215991626317": true, "4.484819357057573": false}, "2.9204215991626317": {"2.9926911122277384": true, "3.0386302571116017": false, "3.4057796959593216": false}, "2.9926911122277384": {"3.078959798879103": true, "4.31757267720022": true}, "3.078959798879103": {"3.745112978131361": true, "4.437125581395704": false, "4.730576366268757": false}, "3.745112978131361": {"3.9728735450725567": true, "4.260632679798819": false}, "3.9728735450725567": {"4.012053155286216": true}, "4.012053155286216": {}, "4.31757267720022": {"4.563299762094057": true}, "4.563299762094057": {"4.984939178222256": true}, "4.984939178222256": {}, "3.1678837001042153": {"3.4521137110902207": false, "4.250178524314852": true}, "4.250178524314852": {"4.8515538451949345": false, "4.886848999982991": false}, "4.194441579392596": {}}, {"1": {"0.040572687964904": false, "1.4860791839060803": false, "2.476381613412166": true, "2.620422586501418": true, "3.1678837001042153": true, "4.194441579392596": true, "4.241300971232662": false}, "2.476381613412166": {"3.1770313200314804": false, "4.22833140985528": false}, "2.620422586501418": {"2.9204215991626317": true, "4.484819357057573": false}, "2.9204215991626317": {"2.9926911122277384": true, "3.0386302571116017": false, "3.4057796959593216": false}, "2.9926911122277384": {"3.078959798879103": true, "4.31757267720022": true}, "3.078959798879103": {"3.745112978131361": true, "4.437125581395704": false, "4.730576366268757": false}, "3.745112978131361": {"3.9728735450725567": true, "4.260632679798819": false}, "3.9728735450725567": {"4.012053155286216": true}, "4.012053155286216": {}, "4.31757267720022": {"4.563299762094057": true}, "4.563299762094057": {"4.984939178222256": true}, "4.984939178222256": {}, "3.1678837001042153": {"3.4521137110902207": false, "4.250178524314852": true}, "4.250178524314852": {"4.8515538451949345": false, "4.886848999982991": false}, "4.194441579392596": {}}, {"1": {"0.040572687964904": false, "1.4860791839060803": false, "2.476381613412166": true, "2.620422586501418": true, "3.1678837001042153": true, "4.194441579392596": true, "4.241300971232662": false}, "2.476381613412166": {"3.1770313200314804": false, "4.22833140985528": false}, "2.620422586501418": {"2.9204215991626317": true, "4.484819357057573": false}, "2.9204215991626317": {"2.9926911122277384": true, "3.0386302571116017": false, "3.4057796959593216": false}, "2.9926911122277384": {"3.078959798879103": true, "4.31757267720022": true}, "3.078959798879103": {"3.745112978131361": true, "4.437125581395704": false, "4.730576366268757": false}, "3.745112978131361": {"3.9728735450725567": true, "4.260632679798819": false}, "3.9728735450725567": {"4.012053155286216": true}, "4.012053155286216": {}, "4.31757267720022": {"4.563299762094057": true}, "4.563299762094057": {"4.984939178222256": true}, "4.984939178222256": {}, "3.1678837001042153": {"3.4521137110902207": false, "4.250178524314852": true}, "4.250178524314852": {"4.8515538451949345": false, "4.886848999982991": false}, "4.194441579392596": {}}, {"1": {"0.040572687964904": false, "1.4860791839060803": false, "2.476381613412166": true, "2.620422586501418": true, "3.1678837001042153": true, "4.194441579392596": true, "4.241300971232662": false}, "2.476381613412166": {"3.1770313200314804": false, "4.22833140985528": false}, "2.620422586501418": {"2.9204215991626317": true, "4.484819357057573": false}, "2.9204215991626317": {"2.9926911122277384": true, "3.0386302571116017": false, "3.4057796959593216": false}, "2.9926911122277384": {"3.078959798879103": true, "4.31757267720022": true}, "3.078959798879103": {"3.745112978131361": true, "4.437125581395704": false, "4.730576366268757": false}, "3.745112978131361": {"3.9728735450725567": true, "4.260632679798819": false}, "3.9728735450725567": {"4.012053155286216": true}, "4.012053155286216": {}, "4.31757267720022": {"4.563299762094057": true}, "4.563299762094057": {"4.984939178222256": true}, "4.984939178222256": {}, "3.1678837001042153": {"3.4521137110902207": false, "4.250178524314852": true}, "4.250178524314852": {"4.8515538451949345": false, "4.886848999982991": false}, "4.194441579392596": {}}, {"1": {"0.040572687964904": false, "1.4860791839060803": false, "2.476381613412166": true, "2.620422586501418": true, "3.1678837001042153": true, "4.194441579392596": true, "4.241300971232662": false}, "2.476381613412166": {"3.1770313200314804": false, "4.22833140985528": false}, "2.620422586501418": {"2.9204215991626317": true, "4.484819357057573": false}, "2.9204215991626317": {"2.9926911122277384": true, "3.0386302571116017": false, "3.4057796959593216": false}, "2.9926911122277384": {"3.078959798879103": true, "4.31757267720022": true}, "3.078959798879103": {"3.745112978131361": true, "4.437125581395704": false, "4.730576366268757": false}, "3.745112978131361": {"3.9728735450725567": true, "4.260632679798819": false}, "3.9728735450725567": {"4.012053155286216": true}, "4.012053155286216": {}, "4.31757267720022": {"4.563299762094057": true}, "4.563299762094057": {"4.984939178222256": true}, "4.984939178222256": {}, "3.1678837001042153": {"3.4521137110902207": false, "4.250178524314852": true}, "4.250178524314852": {"4.8515538451949345": false, "4.886848999982991": false}, "4.194441579392596": {}}, {"1": {"0.040572687964904": false, "1.4860791839060803": false, "2.476381613412166": true, "2.620422586501418": true, "3.1678837001042153": true, "4.194441579392596": true, "4.241300971232662": false}, "2.476381613412166": {"3.1770313200314804": false, "4.22833140985528": false}, "2.620422586501418": {"2.9204215991626317": true, "4.484819357057573": false}, "2.9204215991626317": {"2.9926911122277384": true, "3.0386302571116017": false, "3.4057796959593216": false}, "2.9926911122277384": {"3.078959798879103": true, "4.31757267720022": true}, "3.078959798879103": {"3.745112978131361": true, "4.437125581395704": false, "4.730576366268757": false}, "3.745112978131361": {"3.9728735450725567": true, "4.260632679798819": false}, "3.9728735450725567": {"4.012053155286216": true}, "4.012053155286216": {}, "4.31757267720022": {"4.563299762094057": true}, "4.563299762094057": {"4.984939178222256": true}, "4.984939178222256": {}, "3.1678837001042153": {"3.4521137110902207": false, "4.250178524314852": true}, "4.250178524314852": {"4.8515538451949345": false, "4.886848999982991": false}, "4.194441579392596": {}}, {"1": {"0.040572687964904": false, "1.4860791839060803": false, "2.476381613412166": true, "2.620422586501418": true, "3.1678837001042153": true, "4.194441579392596": true, "4.241300971232662": false}, "2.476381613412166": {"3.1770313200314804": false, "4.22833140985528": false}, "2.620422586501418": {"2.9204215991626317": true, "4.484819357057573": false}, "2.9204215991626317": {"2.9926911122277384": true, "3.0386302571116017": false, "3.4057796959593216": false}, "2.9926911122277384": {"3.078959798879103": true, "4.31757267720022": true}, "3.078959798879103": {"3.745112978131361": true, "4.437125581395704": false, "4.730576366268757": false}, "3.745112978131361": {"3.9728735450725567": true, "4.260632679798819": false}, "3.9728735450725567": {"4.012053155286216": true}, "4.012053155286216": {}, "4.31757267720022": {"4.563299762094057": true}, "4.563299762094057": {"4.984939178222256": true}, "4.984939178222256": {}, "3.1678837001042153": {"3.4521137110902207": false, "4.250178524314852": true}, "4.250178524314852": {"4.8515538451949345": false, "4.886848999982991": false}, "4.194441579392596": {}}, {"1": {"0.040572687964904": false, "1.4860791839060803": false, "2.476381613412166": true, "2.620422586501418": true, "3.1678837001042153": true, "4.194441579392596": true, "4.241300971232662": false}, "2.476381613412166": {"3.1770313200314804": false, "4.22833140985528": false}, "2.620422586501418": {"2.9204215991626317": true, "4.484819357057573": false}, "2.9204215991626317": {"2.9926911122277384": true, "3.0386302571116017": false, "3.4057796959593216": false}, "2.9926911122277384": {"3.078959798879103": true, "4.31757267720022": true}, "3.078959798879103": {"3.745112978131361": true, "4.437125581395704": false, "4.730576366268757": false}, "3.745112978131361": {"3.9728735450725567": true, "4.260632679798819": false}, "3.9728735450725567": {"4.012053155286216": true}, "4.012053155286216": {}, "4.31757267720022": {"4.563299762094057": true}, "4.563299762094057": {"4.984939178222256": true}, "4.984939178222256": {}, "3.1678837001042153": {"3.4521137110902207": false, "4.250178524314852": true}, "4.250178524314852": {"4.8515538451949345": false, "4.886848999982991": false}, "4.194441579392596": {}}, {"1": {"0.040572687964904": false, "1.4860791839060803": false, "2.476381613412166": true, "2.620422586501418": true, "3.1678837001042153": true, "4.194441579392596": true, "4.241300971232662": false}, "2.476381613412166": {"3.1770313200314804": false, "4.22833140985528": false}, "2.620422586501418": {"2.9204215991626317": true, "4.484819357057573": false}, "2.9204215991626317": {"2.9926911122277384": true, "3.0386302571116017": false, "3.4057796959593216": false}, "2.9926911122277384": {"3.078959798879103": true, "4.31757267720022": true}, "3.078959798879103": {"3.745112978131361": true, "4.437125581395704": false, "4.730576366268757": false}, "3.745112978131361": {"3.9728735450725567": true, "4.260632679798819": false}, "3.9728735450725567": {"4.012053155286216": true}, "4.012053155286216": {}, "4.31757267720022": {"4.563299762094057": true}, "4.563299762094057": {"4.984939178222256": true}, "4.984939178222256": {}, "3.1678837001042153": {"3.4521137110902207": false, "4.250178524314852": true}, "4.250178524314852": {"4.8515538451949345": false, "4.886848999982991": false}, "4.194441579392596": {}}, {"1": {"0.040572687964904": false, "1.4860791839060803": false, "2.476381613412166": true, "2.620422586501418": true, "3.1678837001042153": true, "4.194441579392596": true, "4.241300971232662": false}, "2.476381613412166": {"3.1770313200314804": false, "4.22833140985528": false}, "2.620422586501418": {"2.9204215991626317": true, "4.484819357057573": false}, "2.9204215991626317": {"2.9926911122277384": true, "3.0386302571116017": false, "3.4057796959593216": false}, "2.9926911122277384": {"3.078959798879103": true, "4.31757267720022": true}, "3.078959798879103": {"3.745112978131361": true, "4.437125581395704": false, "4.730576366268757": false}, "3.745112978131361": {"3.9728735450725567": true, "4.260632679798819": false}, "3.9728735450725567": {"4.012053155286216": true}, "4.012053155286216": {}, "4.31757267720022": {"4.563299762094057": true}, "4.563299762094057": {"4.984939178222256": true}, "4.984939178222256": {}, "3.1678837001042153": {"3.4521137110902207": false, "4.250178524314852": true}, "4.250178524314852": {"4.8515538451949345": false, "4.886848999982991": false}, "4.194441579392596": {}}, {"1": {"0.0008748772947001578": false, "1.943406114445818": true, "2.3325360999829403": false, "2.6328830904464477": false, "4.866014817800407": true}, "1.943406114445818": {"1.9915618795222287": false, "2.3112405590583305": true, "2.3755330757113398": true, "3.5898833412876385": false, "4.431006120428109": false, "4.787239503939893": false}, "2.3112405590583305": {"2.8840931115811883": true, "3.355779909130448": true, "3.6148760626030674": false, "3.9855406864669143": false, "4.360868282988019": false}, "2.8840931115811883": {"3.6892459148633496": false, "4.320711850627607": false, "4.330241483361246": true, "4.925366743554779": false}, "4.330241483361246": {"4.516916256775548": true}, "4.516916256775548": {"4.695158607962949": true}, "4.695158607962949": {}, "3.355779909130448": {"4.323517912747853": true, "4.953820574868891": false}, "4.323517912747853": {"4.604360684799347": true, "4.694906476912077": true}, "4.604360684799347": {}, "4.694906476912077": {"4.954070800572194": false}, "2.3755330757113398": {"2.726573792220085": false, "3.7052923440683445": true, "4.127200556244493": false}, "3.7052923440683445": {"4.042039235648007": false}, "4.866014817800407": {"4.877481181675806": true}, "4.877481181675806": {"4.980390778459003": true}, "4.980390778459003": {}}, {"1": {"0.0008748772947001578": false, "1.943406114445818": true, "2.3325360999829403": false, "2.6328830904464477": false, "4.866014817800407": true}, "1.943406114445818": {"1.9915618795222287": false, "2.3112405590583305": true, "2.3755330757113398": true, "3.5898833412876385": false, "4.431006120428109": false, "4.787239503939893": false}, "2.3112405590583305": {"2.8840931115811883": true, "3.355779909130448": true, "3.6148760626030674": false, "3.9855406864669143": false, "4.360868282988019": false}, "2.8840931115811883": {"3.6892459148633496": false, "4.320711850627607": false, "4.330241483361246": true, "4.925366743554779": false}, "4.330241483361246": {"4.516916256775548": true}, "4.516916256775548": {"4.695158607962949": true}, "4.695158607962949": {}, "3.355779909130448": {"4.323517912747853": true, "4.953820574868891": false}, "4.323517912747853": {"4.604360684799347": true, "4.694906476912077": true}, "4.604360684799347": {}, "4.694906476912077": {"4.954070800572194": false}, "2.3755330757113398": {"2.726573792220085": false, "3.7052923440683445": true, "4.127200556244493": false}, "3.7052923440683445": {"4.042039235648007": false}, "4.866014817800407": {"4.877481181675806": true}, "4.877481181675806": {"4.980390778459003": true}, "4.980390778459003": {}}, {"1": {"0.0008748772947001578": false, "1.943406114445818": true, "2.3325360999829403": false, "2.6328830904464477": false, "4.866014817800407": true}, "1.943406114445818": {"1.9915618795222287": false, "2.3112405590583305": true, "2.3755330757113398": true, "3.5898833412876385": false, "4.431006120428109": false, "4.787239503939893": false}, "2.3112405590583305": {"2.8840931115811883": true, "3.355779909130448": true, "3.6148760626030674": false, "3.9855406864669143": false, "4.360868282988019": false}, "2.8840931115811883": {"3.6892459148633496": false, "4.320711850627607": false, "4.330241483361246": true, "4.925366743554779": false}, "4.330241483361246": {"4.516916256775548": true}, "4.516916256775548": {"4.695158607962949": true}, "4.695158607962949": {}, "3.355779909130448": {"4.323517912747853": true, "4.953820574868891": false}, "4.323517912747853": {"4.604360684799347": true, "4.694906476912077": true}, "4.604360684799347": {}, "4.694906476912077": {"4.954070800572194": false}, "2.3755330757113398": {"2.726573792220085": false, "3.7052923440683445": true, "4.127200556244493": false}, "3.7052923440683445": {"4.042039235648007": false}, "4.866014817800407": {"4.877481181675806": true}, "4.877481181675806": {"4.980390778459003": true}, "4.980390778459003": {}}, {"1": {"0.0008748772947001578": false, "1.943406114445818": true, "2.3325360999829403": false, "2.6328830904464477": false, "4.866014817800407": true}, "1.943406114445818": {"1.9915618795222287": false, "2.3112405590583305": true, "2.3755330757113398": true, "3.5898833412876385": false, "4.431006120428109": false, "4.787239503939893": false}, "2.3112405590583305": {"2.8840931115811883": true, "3.355779909130448": true, "3.6148760626030674": false, "3.9855406864669143": false, "4.360868282988019": false}, "2.8840931115811883": {"3.6892459148633496": false, "4.320711850627607": false, "4.330241483361246": true, "4.925366743554779": false}, "4.330241483361246": {"4.516916256775548": true}, "4.516916256775548": {"4.695158607962949": true}, "4.695158607962949": {}, "3.355779909130448": {"4.323517912747853": true, "4.953820574868891": false}, "4.323517912747853": {"4.604360684799347": true, "4.694906476912077": true}, "4.604360684799347": {}, "4.694906476912077": {"4.954070800572194": false}, "2.3755330757113398": {"2.726573792220085": false, "3.7052923440683445": true, "4.127200556244493": false}, "3.7052923440683445": {"4.042039235648007": false}, "4.866014817800407": {"4.877481181675806": true}, "4.877481181675806": {"4.980390778459003": true}, "4.980390778459003": {}}, {"1": {"0.0008748772947001578": false, "1.943406114445818": true, "2.3325360999829403": false, "2.6328830904464477": false, "4.866014817800407": true}, "1.943406114445818": {"1.9915618795222287": false, "2.3112405590583305": true, "2.3755330757113398": true, "3.5898833412876385": false, "4.431006120428109": false, "4.787239503939893": false}, "2.3112405590583305": {"2.8840931115811883": true, "3.355779909130448": true, "3.6148760626030674": false, "3.9855406864669143": false, "4.360868282988019": false}, "2.8840931115811883": {"3.6892459148633496": false, "4.320711850627607": false, "4.330241483361246": true, "4.925366743554779": false}, "4.330241483361246": {"4.516916256775548": true}, "4.516916256775548": {"4.695158607962949": true}, "4.695158607962949": {}, "3.355779909130448": {"4.323517912747853": true, "4.953820574868891": false}, "4.323517912747853": {"4.604360684799347": true, "4.694906476912077": true}, "4.604360684799347": {}, "4.694906476912077": {"4.954070800572194": false}, "2.3755330757113398": {"2.726573792220085": false, "3.7052923440683445": true, "4.127200556244493": false}, "3.7052923440683445": {"4.042039235648007": false}, "4.866014817800407": {"4.877481181675806": true}, "4.877481181675806": {"4.980390778459003": true}, "4.980390778459003": {}}, {"1": {"0.0008748772947001578": false, "1.943406114445818": true, "2.3325360999829403": false, "2.6328830904464477": false, "4.866014817800407": true}, "1.943406114445818": {"1.9915618795222287": false, "2.3112405590583305": true, "2.3755330757113398": true, "3.5898833412876385": false, "4.431006120428109": false, "4.787239503939893": false}, "2.3112405590583305": {"2.8840931115811883": true, "3.355779909130448": true, "3.6148760626030674": false, "3.9855406864669143": false, "4.360868282988019": false}, "2.8840931115811883": {"3.6892459148633496": false, "4.320711850627607": false, "4.330241483361246": true, "4.925366743554779": false}, "4.330241483361246": {"4.516916256775548": true}, "4.516916256775548": {"4.695158607962949": true}, "4.695158607962949": {}, "3.355779909130448": {"4.323517912747853": true, "4.953820574868891": false}, "4.323517912747853": {"4.604360684799347": true, "4.694906476912077": true}, "4.604360684799347": {}, "4.694906476912077": {"4.954070800572194": false}, "2.3755330757113398": {"2.726573792220085": false, "3.7052923440683445": true, "4.127200556244493": false}, "3.7052923440683445": {"4.042039235648007": false}, "4.866014817800407": {"4.877481181675806": true}, "4.877481181675806": {"4.980390778459003": true}, "4.980390778459003": {}}, {"1": {"0.0008748772947001578": false, "1.943406114445818": true, "2.3325360999829403": false, "2.6328830904464477": false, "4.866014817800407": true}, "1.943406114445818": {"1.9915618795222287": false, "2.3112405590583305": true, "2.3755330757113398": true, "3.5898833412876385": false, "4.431006120428109": false, "4.787239503939893": false}, "2.3112405590583305": {"2.8840931115811883": true, "3.355779909130448": true, "3.6148760626030674": false, "3.9855406864669143": false, "4.360868282988019": false}, "2.8840931115811883": {"3.6892459148633496": false, "4.320711850627607": false, "4.330241483361246": true, "4.925366743554779": false}, "4.330241483361246": {"4.516916256775548": true}, "4.516916256775548": {"4.695158607962949": true}, "4.695158607962949": {}, "3.355779909130448": {"4.323517912747853": true, "4.953820574868891": false}, "4.323517912747853": {"4.604360684799347": true, "4.694906476912077": true}, "4.604360684799347": {}, "4.694906476912077": {"4.954070800572194": false}, "2.3755330757113398": {"2.726573792220085": false, "3.7052923440683445": true, "4.127200556244493": false}, "3.7052923440683445": {"4.042039235648007": false}, "4.866014817800407": {"4.877481181675806": true}, "4.877481181675806": {"4.980390778459003": true}, "4.980390778459003": {}}, {"1": {"0.0008748772947001578": false, "1.943406114445818": true, "2.3325360999829403": false, "2.6328830904464477": false, "4.866014817800407": true}, "1.943406114445818": {"1.9915618795222287": false, "2.3112405590583305": true, "2.3755330757113398": true, "3.5898833412876385": false, "4.431006120428109": false, "4.787239503939893": false}, "2.3112405590583305": {"2.8840931115811883": true, "3.355779909130448": true, "3.6148760626030674": false, "3.9855406864669143": false, "4.360868282988019": false}, "2.8840931115811883": {"3.6892459148633496": false, "4.320711850627607": false, "4.330241483361246": true, "4.925366743554779": false}, "4.330241483361246": {"4.516916256775548": true}, "4.516916256775548": {"4.695158607962949": true}, "4.695158607962949": {}, "3.355779909130448": {"4.323517912747853": true, "4.953820574868891": false}, "4.323517912747853": {"4.604360684799347": true, "4.694906476912077": true}, "4.604360684799347": {}, "4.694906476912077": {"4.954070800572194": false}, "2.3755330757113398": {"2.726573792220085": false, "3.7052923440683445": true, "4.127200556244493": false}, "3.7052923440683445": {"4.042039235648007": false}, "4.866014817800407": {"4.877481181675806": true}, "4.877481181675806": {"4.980390778459003": true}, "4.980390778459003": {}}, {"1": {"0.0008748772947001578": false, "1.943406114445818": true, "2.3325360999829403": false, "2.6328830904464477": false, "4.866014817800407": true}, "1.943406114445818": {"1.9915618795222287": false, "2.3112405590583305": true, "2.3755330757113398": true, "3.5898833412876385": false, "4.431006120428109": false, "4.787239503939893": false}, "2.3112405590583305": {"2.8840931115811883": true, "3.355779909130448": true, "3.6148760626030674": false, "3.9855406864669143": false, "4.360868282988019": false}, "2.8840931115811883": {"3.6892459148633496": false, "4.320711850627607": false, "4.330241483361246": true, "4.925366743554779": false}, "4.330241483361246": {"4.516916256775548": true}, "4.516916256775548": {"4.695158607962949": true}, "4.695158607962949": {}, "3.355779909130448": {"4.323517912747853": true, "4.953820574868891": false}, "4.323517912747853": {"4.604360684799347": true, "4.694906476912077": true}, "4.604360684799347": {}, "4.694906476912077": {"4.954070800572194": false}, "2.3755330757113398": {"2.726573792220085": false, "3.7052923440683445": true, "4.127200556244493": false}, "3.7052923440683445": {"4.042039235648007": false}, "4.866014817800407": {"4.877481181675806": true}, "4.877481181675806": {"4.980390778459003": true}, "4.980390778459003": {}}, {"1": {"0.0008748772947001578": false, "1.943406114445818": true, "2.3325360999829403": false, "2.6328830904464477": false, "4.866014817800407": true}, "1.943406114445818": {"1.9915618795222287": false, "2.3112405590583305": true, "2.3755330757113398": true, "3.5898833412876385": false, "4.431006120428109": false, "4.787239503939893": false}, "2.3112405590583305": {"2.8840931115811883": true, "3.355779909130448": true, "3.6148760626030674": false, "3.9855406864669143": false, "4.360868282988019": false}, "2.8840931115811883": {"3.6892459148633496": false, "4.320711850627607": false, "4.330241483361246": true, "4.925366743554779": false}, "4.330241483361246": {"4.516916256775548": true}, "4.516916256775548": {"4.695158607962949": true}, "4.695158607962949": {}, "3.355779909130448": {"4.323517912747853": true, "4.953820574868891": false}, "4.323517912747853": {"4.604360684799347": true, "4.694906476912077": true}, "4.604360684799347": {}, "4.694906476912077": {"4.954070800572194": false}, "2.3755330757113398": {"2.726573792220085": false, "3.7052923440683445": true, "4.127200556244493": false}, "3.7052923440683445": {"4.042039235648007": false}, "4.866014817800407": {"4.877481181675806": true}, "4.877481181675806": {"4.980390778459003": true}, "4.980390778459003": {}}, {"1": {"0.0008748772947001578": false, "1.943406114445818": true, "2.3325360999829403": false, "2.6328830904464477": false, "4.866014817800407": true}, "1.943406114445818": {"1.9915618795222287": false, "2.3112405590583305": true, "2.3755330757113398": true, "3.5898833412876385": false, "4.431006120428109": false, "4.787239503939893": false}, "2.3112405590583305": {"2.8840931115811883": true, "3.355779909130448": true, "3.6148760626030674": false, "3.9855406864669143": false, "4.360868282988019": false}, "2.8840931115811883": {"3.6892459148633496": false, "4.320711850627607": false, "4.330241483361246": true, "4.925366743554779": false}, "4.330241483361246": {"4.516916256775548": true}, "4.516916256775548": {"4.695158607962949": true}, "4.695158607962949": {}, "3.355779909130448": {"4.323517912747853": true, "4.953820574868891": false}, "4.323517912747853": {"4.604360684799347": true, "4.694906476912077": true}, "4.604360684799347": {}, "4.694906476912077": {"4.954070800572194": false}, "2.3755330757113398": {"2.726573792220085": false, "3.7052923440683445": true, "4.127200556244493": false}, "3.7052923440683445": {"4.042039235648007": false}, "4.866014817800407": {"4.877481181675806": true}, "4.877481181675806": {"4.980390778459003": true}, "4.980390778459003": {}}, {"1": {"0.0008748772947001578": false, "1.943406114445818": true, "2.3325360999829403": false, "2.6328830904464477": false, "4.866014817800407": true}, "1.943406114445818": {"1.9915618795222287": false, "2.3112405590583305": true, "2.3755330757113398": true, "3.5898833412876385": false, "4.431006120428109": false, "4.787239503939893": false}, "2.3112405590583305": {"2.8840931115811883": true, "3.355779909130448": true, "3.6148760626030674": false, "3.9855406864669143": false, "4.360868282988019": false}, "2.8840931115811883": {"3.6892459148633496": false, "4.320711850627607": false, "4.330241483361246": true, "4.925366743554779": false}, "4.330241483361246": {"4.516916256775548": true}, "4.516916256775548": {"4.695158607962949": true}, "4.695158607962949": {}, "3.355779909130448": {"4.323517912747853": true, "4.953820574868891": false}, "4.323517912747853": {"4.604360684799347": true, "4.694906476912077": true}, "4.604360684799347": {}, "4.694906476912077": {"4.954070800572194": false}, "2.3755330757113398": {"2.726573792220085": false, "3.7052923440683445": true, "4.127200556244493": false}, "3.7052923440683445": {"4.042039235648007": false}, "4.866014817800407": {"4.877481181675806": true}, "4.877481181675806": {"4.980390778459003": true}, "4.980390778459003": {}}, {"1": {"0.0008748772947001578": false, "1.943406114445818": true, "2.3325360999829403": false, "2.6328830904464477": false, "4.866014817800407": true}, "1.943406114445818": {"1.9915618795222287": false, "2.3112405590583305": true, "2.3755330757113398": true, "3.5898833412876385": false, "4.431006120428109": false, "4.787239503939893": false}, "2.3112405590583305": {"2.8840931115811883": true, "3.355779909130448": true, "3.6148760626030674": false, "3.9855406864669143": false, "4.360868282988019": false}, "2.8840931115811883": {"3.6892459148633496": false, "4.320711850627607": false, "4.330241483361246": true, "4.925366743554779": false}, "4.330241483361246": {"4.516916256775548": true}, "4.516916256775548": {"4.695158607962949": true}, "4.695158607962949": {}, "3.355779909130448": {"4.323517912747853": true, "4.953820574868891": false}, "4.323517912747853": {"4.604360684799347": true, "4.694906476912077": true}, "4.604360684799347": {}, "4.694906476912077": {"4.954070800572194": false}, "2.3755330757113398": {"2.726573792220085": false, "3.7052923440683445": true, "4.127200556244493": false}, "3.7052923440683445": {"4.042039235648007": false}, "4.866014817800407": {"4.877481181675806": true}, "4.877481181675806": {"4.980390778459003": true}, "4.980390778459003": {}}, {"1": {"0.0008748772947001578": false, "1.943406114445818": true, "2.3325360999829403": false, "2.6328830904464477": false, "4.866014817800407": true}, "1.943406114445818": {"1.9915618795222287": false, "2.3112405590583305": true, "2.3755330757113398": true, "3.5898833412876385": false, "4.431006120428109": false, "4.787239503939893": false}, "2.3112405590583305": {"2.8840931115811883": true, "3.355779909130448": true, "3.6148760626030674": false, "3.9855406864669143": false, "4.360868282988019": false}, "2.8840931115811883": {"3.6892459148633496": false, "4.320711850627607": false, "4.330241483361246": true, "4.925366743554779": false}, "4.330241483361246": {"4.516916256775548": true}, "4.516916256775548": {"4.695158607962949": true}, "4.695158607962949": {}, "3.355779909130448": {"4.323517912747853": true, "4.953820574868891": false}, "4.323517912747853": {"4.604360684799347": true, "4.694906476912077": true}, "4.604360684799347": {}, "4.694906476912077": {"4.954070800572194": false}, "2.3755330757113398": {"2.726573792220085": false, "3.7052923440683445": true, "4.127200556244493": false}, "3.7052923440683445": {"4.042039235648007": false}, "4.866014817800407": {"4.877481181675806": true}, "4.877481181675806": {"4.980390778459003": true}, "4.980390778459003": {}}, {"1": {"0.0008748772947001578": false, "1.943406114445818": true, "2.3325360999829403": false, "2.6328830904464477": false, "4.866014817800407": true}, "1.943406114445818": {"1.9915618795222287": false, "2.3112405590583305": true, "2.3755330757113398": true, "3.5898833412876385": false, "4.431006120428109": false, "4.787239503939893": false}, "2.3112405590583305": {"2.8840931115811883": true, "3.355779909130448": true, "3.6148760626030674": false, "3.9855406864669143": false, "4.360868282988019": false}, "2.8840931115811883": {"3.6892459148633496": false, "4.320711850627607": false, "4.330241483361246": true, "4.925366743554779": false}, "4.330241483361246": {"4.516916256775548": true}, "4.516916256775548": {"4.695158607962949": true}, "4.695158607962949": {}, "3.355779909130448": {"4.323517912747853": true, "4.953820574868891": false}, "4.323517912747853": {"4.604360684799347": true, "4.694906476912077": true}, "4.604360684799347": {}, "4.694906476912077": {"4.954070800572194": false}, "2.3755330757113398": {"2.726573792220085": false, "3.7052923440683445": true, "4.127200556244493": false}, "3.7052923440683445": {"4.042039235648007": false}, "4.866014817800407": {"4.877481181675806": true}, "4.877481181675806": {"4.980390778459003": true}, "4.980390778459003": {}}, {"1": {"0.0008748772947001578": false, "1.943406114445818": true, "2.3325360999829403": false, "2.6328830904464477": false, "4.866014817800407": true}, "1.943406114445818": {"1.9915618795222287": false, "2.3112405590583305": true, "2.3755330757113398": true, "3.5898833412876385": false, "4.431006120428109": false, "4.787239503939893": false}, "2.3112405590583305": {"2.8840931115811883": true, "3.355779909130448": true, "3.6148760626030674": false, "3.9855406864669143": false, "4.360868282988019": false}, "2.8840931115811883": {"3.6892459148633496": false, "4.320711850627607": false, "4.330241483361246": true, "4.925366743554779": false}, "4.330241483361246": {"4.516916256775548": true}, "4.516916256775548": {"4.695158607962949": true}, "4.695158607962949": {}, "3.355779909130448": {"4.323517912747853": true, "4.953820574868891": false}, "4.323517912747853": {"4.604360684799347": true, "4.694906476912077": true}, "4.604360684799347": {}, "4.694906476912077": {"4.954070800572194": false}, "2.3755330757113398": {"2.726573792220085": false, "3.7052923440683445": true, "4.127200556244493": false}, "3.7052923440683445": {"4.042039235648007": false}, "4.866014817800407": {"4.877481181675806": true}, "4.877481181675806": {"4.980390778459003": true}, "4.980390778459003": {}}, {"1": {"0.0008748772947001578": false, "1.943406114445818": true, "2.3325360999829403": false, "2.6328830904464477": false, "4.866014817800407": true}, "1.943406114445818": {"1.9915618795222287": false, "2.3112405590583305": true, "2.3755330757113398": true, "3.5898833412876385": false, "4.431006120428109": false, "4.787239503939893": false}, "2.3112405590583305": {"2.8840931115811883": true, "3.355779909130448": true, "3.6148760626030674": false, "3.9855406864669143": false, "4.360868282988019": false}, "2.8840931115811883": {"3.6892459148633496": false, "4.320711850627607": false, "4.330241483361246": true, "4.925366743554779": false}, "4.330241483361246": {"4.516916256775548": true}, "4.516916256775548": {"4.695158607962949": true}, "4.695158607962949": {}, "3.355779909130448": {"4.323517912747853": true, "4.953820574868891": false}, "4.323517912747853": {"4.604360684799347": true, "4.694906476912077": true}, "4.604360684799347": {}, "4.694906476912077": {"4.954070800572194": false}, "2.3755330757113398": {"2.726573792220085": false, "3.7052923440683445": true, "4.127200556244493": false}, "3.7052923440683445": {"4.042039235648007": false}, "4.866014817800407": {"4.877481181675806": true}, "4.877481181675806": {"4.980390778459003": true}, "4.980390778459003": {}}, {"1": {"0.0008748772947001578": false, "1.943406114445818": true, "2.3325360999829403": false, "2.6328830904464477": false, "4.866014817800407": true}, "1.943406114445818": {"1.9915618795222287": false, "2.3112405590583305": true, "2.3755330757113398": true, "3.5898833412876385": false, "4.431006120428109": false, "4.787239503939893": false}, "2.3112405590583305": {"2.8840931115811883": true, "3.355779909130448": true, "3.6148760626030674": false, "3.9855406864669143": false, "4.360868282988019": false}, "2.8840931115811883": {"3.6892459148633496": false, "4.320711850627607": false, "4.330241483361246": true, "4.925366743554779": false}, "4.330241483361246": {"4.516916256775548": true}, "4.516916256775548": {"4.695158607962949": true}, "4.695158607962949": {}, "3.355779909130448": {"4.323517912747853": true, "4.953820574868891": false}, "4.323517912747853": {"4.604360684799347": true, "4.694906476912077": true}, "4.604360684799347": {}, "4.694906476912077": {"4.954070800572194": false}, "2.3755330757113398": {"2.726573792220085": false, "3.7052923440683445": true, "4.127200556244493": false}, "3.7052923440683445": {"4.042039235648007": false}, "4.866014817800407": {"4.877481181675806": true}, "4.877481181675806": {"4.980390778459003": true}, "4.980390778459003": {}}, {"1": {"0.0008748772947001578": false, "1.943406114445818": true, "2.3325360999829403": false, "2.6328830904464477": false, "4.866014817800407": true}, "1.943406114445818": {"1.9915618795222287": false, "2.3112405590583305": true, "2.3755330757113398": true, "3.5898833412876385": false, "4.431006120428109": false, "4.787239503939893": false}, "2.3112405590583305": {"2.8840931115811883": true, "3.355779909130448": true, "3.6148760626030674": false, "3.9855406864669143": false, "4.360868282988019": false}, "2.8840931115811883": {"3.6892459148633496": false, "4.320711850627607": false, "4.330241483361246": true, "4.925366743554779": false}, "4.330241483361246": {"4.516916256775548": true}, "4.516916256775548": {"4.695158607962949": true}, "4.695158607962949": {}, "3.355779909130448": {"4.323517912747853": true, "4.953820574868891": false}, "4.323517912747853": {"4.604360684799347": true, "4.694906476912077": true}, "4.604360684799347": {}, "4.694906476912077": {"4.954070800572194": false}, "2.3755330757113398": {"2.726573792220085": false, "3.705292344068344
[truncated: 1,705,392 more chars]
