# Supplementary material
Source: ML conference proceedings conference paper supplement (https://proceedings.neurips.cc/paper_files/paper/2022/hash/9d3faa41886997cfc2128b930077fa49-Abstract.html)
Supplement: Supplementary file 1 [file 9d3faa41886997cfc2128b930077fa49-Supplemental-Conference.zip › code/src/data_hawkes/higher_hawkes.csv]

	Group	Number of Counterfactuals
0	5.04	14
1	5.04	13
2	5.04	16
3	5.04	14
4	5.04	12
5	5.04	20
6	5.04	28
7	5.04	17
8	5.04	16
9	5.04	15
10	5.04	27
11	5.04	14
12	5.04	13
13	5.04	14
14	5.04	11
15	5.04	49
16	5.04	16
17	5.04	34
18	5.04	19
19	5.04	9
20	5.04	19
21	5.04	13
22	5.04	27
23	5.04	25
24	5.04	15
25	5.04	11
26	5.04	13
27	5.04	13
28	5.04	17
29	5.04	11
30	5.04	11
31	5.04	13
32	5.04	21
33	5.04	25
34	5.04	46
35	5.04	16
36	5.04	23
37	5.04	13
38	5.04	16
39	5.04	13
40	5.04	19
41	5.04	14
42	5.04	10
43	5.04	19
44	5.04	11
45	5.04	15
46	5.04	17
47	5.04	10
48	5.04	19
49	5.04	11
50	5.04	19
51	5.04	11
52	5.04	33
53	5.04	21
54	5.04	10
55	5.04	33
56	5.04	26
57	5.04	15
58	5.04	18
59	5.04	19
60	5.04	19
61	5.04	11
62	5.04	19
63	5.04	11
64	5.04	18
65	5.04	11
66	5.04	31
67	5.04	12
68	5.04	24
69	5.04	22
70	5.04	12
71	5.04	9
72	5.04	9
73	5.04	10
74	5.04	18
75	5.04	15
76	5.04	17
77	5.04	19
78	5.04	30
79	5.04	13
80	5.04	21
81	5.04	17
82	5.04	14
83	5.04	13
84	5.04	19
85	5.04	28
86	5.04	26
87	5.04	10
88	5.04	13
89	5.04	18
90	5.04	15
91	5.04	14
92	5.04	22
93	5.04	14
94	5.04	18
95	5.04	14
96	5.04	12
97	5.04	17
98	5.04	29
99	5.04	9
100	5.04	14
101	5.04	13
102	5.04	16
103	5.04	14
104	5.04	12
105	5.04	20
106	5.04	28
107	5.04	17
108	5.04	16
109	5.04	15
110	5.04	27
111	5.04	14
112	5.04	13
113	5.04	14
114	5.04	11
115	5.04	49
116	5.04	16
117	5.04	34
118	5.04	19
119	5.04	9
120	5.04	19
121	5.04	13
122	5.04	27
123	5.04	25
124	5.04	15
125	5.04	11
126	5.04	13
127	5.04	13
128	5.04	17
129	5.04	11
130	5.04	11
131	5.04	13
132	5.04	21
133	5.04	25
134	5.04	46
135	5.04	16
136	5.04	23
137	5.04	13
138	5.04	16
139	5.04	13
140	5.04	19
141	5.04	14
142	5.04	10
143	5.04	19
144	5.04	11
145	5.04	15
146	5.04	17
147	5.04	10
148	5.04	19
149	5.04	11
150	5.04	19
151	5.04	11
152	5.04	33
153	5.04	21
154	5.04	10
155	5.04	33
156	5.04	26
157	5.04	15
158	5.04	18
159	5.04	19
160	5.04	19
161	5.04	11
162	5.04	19
163	5.04	11
164	5.04	18
165	5.04	11
166	5.04	31
167	5.04	12
168	5.04	24
169	5.04	22
170	5.04	12
171	5.04	9
172	5.04	9
173	5.04	10
174	5.04	18
175	5.04	15
176	5.04	17
177	5.04	19
178	5.04	30
179	5.04	13
180	5.04	21
181	5.04	17
182	5.04	14
183	5.04	13
184	5.04	19
185	5.04	28
186	5.04	26
187	5.04	10
188	5.04	13
189	5.04	18
190	5.04	15
191	5.04	14
192	5.04	22
193	5.04	14
194	5.04	18
195	5.04	14
196	5.04	12
197	5.04	17
198	5.04	29
199	5.04	9
200	5.04	14
201	5.04	13
202	5.04	16
203	5.04	14
204	5.04	12
205	5.04	20
206	5.04	28
207	5.04	17
208	5.04	16
209	5.04	15
210	5.04	27
211	5.04	14
212	5.04	13
213	5.04	14
214	5.04	11
215	5.04	49
216	5.04	16
217	5.04	34
218	5.04	19
219	5.04	9
220	5.04	19
221	5.04	13
222	5.04	27
223	5.04	25
224	5.04	15
225	5.04	11
226	5.04	13
227	5.04	13
228	5.04	17
229	5.04	11
230	5.04	11
231	5.04	13
232	5.04	21
233	5.04	25
234	5.04	46
235	5.04	16
236	5.04	23
237	5.04	13
238	5.04	16
239	5.04	13
240	5.04	19
241	5.04	14
242	5.04	10
243	5.04	19
244	5.04	11
245	5.04	15
246	5.04	17
247	5.04	10
248	5.04	19
249	5.04	11
250	5.04	19
251	5.04	11
252	5.04	33
253	5.04	21
254	5.04	10
255	5.04	33
256	5.04	26
257	5.04	15
258	5.04	18
259	5.04	19
260	5.04	19
261	5.04	11
262	5.04	19
263	5.04	11
264	5.04	18
265	5.04	11
266	5.04	31
267	5.04	12
268	5.04	24
269	5.04	22
270	5.04	12
271	5.04	9
272	5.04	9
273	5.04	10
274	5.04	18
275	5.04	15
276	5.04	17
277	5.04	19
278	5.04	30
279	5.04	13
280	5.04	21
281	5.04	17
282	5.04	14
283	5.04	13
284	5.04	19
285	5.04	28
286	5.04	26
287	5.04	10
288	5.04	13
289	5.04	18
290	5.04	15
291	5.04	14
292	5.04	22
293	5.04	14
294	5.04	18
295	5.04	14
296	5.04	12
297	5.04	17
298	5.04	29
299	5.04	9
300	5.04	14
301	5.04	13
302	5.04	16
303	5.04	14
304	5.04	12
305	5.04	20
306	5.04	28
307	5.04	17
308	5.04	16
309	5.04	15
310	5.04	27
311	5.04	14
312	5.04	13
313	5.04	14
314	5.04	11
315	5.04	49
316	5.04	16
317	5.04	34
318	5.04	19
319	5.04	9
320	5.04	19
321	5.04	13
322	5.04	27
323	5.04	25
324	5.04	15
325	5.04	11
326	5.04	13
327	5.04	13
328	5.04	17
329	5.04	11
330	5.04	11
331	5.04	13
332	5.04	21
333	5.04	25
334	5.04	46
335	5.04	16
336	5.04	23
337	5.04	13
338	5.04	16
339	5.04	13
340	5.04	19
341	5.04	14
342	5.04	10
343	5.04	19
344	5.04	11
345	5.04	15
346	5.04	17
347	5.04	10
348	5.04	19
349	5.04	11
350	5.04	19
351	5.04	11
352	5.04	33
353	5.04	21
354	5.04	10
355	5.04	33
356	5.04	26
357	5.04	15
358	5.04	18
359	5.04	19
360	5.04	19
361	5.04	11
362	5.04	19
363	5.04	11
364	5.04	18
365	5.04	11
366	5.04	31
367	5.04	12
368	5.04	24
369	5.04	22
370	5.04	12
371	5.04	9
372	5.04	9
373	5.04	10
374	5.04	18
375	5.04	15
376	5.04	17
377	5.04	19
378	5.04	30
379	5.04	13
380	5.04	21
381	5.04	17
382	5.04	14
383	5.04	13
384	5.04	19
385	5.04	28
386	5.04	26
387	5.04	10
388	5.04	13
389	5.04	18
390	5.04	15
391	5.04	14
392	5.04	22
393	5.04	14
394	5.04	18
395	5.04	14
396	5.04	12
397	5.04	17
398	5.04	29
399	5.04	9
400	5.04	14
401	5.04	13
402	5.04	16
403	5.04	14
404	5.04	12
405	5.04	20
406	5.04	28
407	5.04	17
408	5.04	16
409	5.04	15
410	5.04	27
411	5.04	14
412	5.04	13
413	5.04	14
414	5.04	11
415	5.04	49
416	5.04	16
417	5.04	34
418	5.04	19
419	5.04	9
420	5.04	19
421	5.04	13
422	5.04	27
423	5.04	25
424	5.04	15
425	5.04	11
426	5.04	13
427	5.04	13
428	5.04	17
429	5.04	11
430	5.04	11
431	5.04	13
432	5.04	21
433	5.04	25
434	5.04	46
435	5.04	16
436	5.04	23
437	5.04	13
438	5.04	16
439	5.04	13
440	5.04	19
441	5.04	14
442	5.04	10
443	5.04	19
444	5.04	11
445	5.04	15
446	5.04	17
447	5.04	10
448	5.04	19
449	5.04	11
450	5.04	19
451	5.04	11
452	5.04	33
453	5.04	21
454	5.04	10
455	5.04	33
456	5.04	26
457	5.04	15
458	5.04	18
459	5.04	19
460	5.04	19
461	5.04	11
462	5.04	19
463	5.04	11
464	5.04	18
465	5.04	11
466	5.04	31
467	5.04	12
468	5.04	24
469	5.04	22
470	5.04	12
471	5.04	9
472	5.04	9
473	5.04	10
474	5.04	18
475	5.04	15
476	5.04	17
477	5.04	19
478	5.04	30
479	5.04	13
480	5.04	21
481	5.04	17
482	5.04	14
483	5.04	13
484	5.04	19
485	5.04	28
486	5.04	26
487	5.04	10
488	5.04	13
489	5.04	18
490	5.04	15
491	5.04	14
492	5.04	22
493	5.04	14
494	5.04	18
495	5.04	14
496	5.04	12
497	5.04	17
498	5.04	29
499	5.04	9
500	5.04	14
501	5.04	13
502	5.04	16
503	5.04	14
504	5.04	12
505	5.04	20
506	5.04	28
507	5.04	17
508	5.04	16
509	5.04	15
510	5.04	27
511	5.04	14
512	5.04	13
513	5.04	14
514	5.04	11
515	5.04	49
516	5.04	16
517	5.04	34
518	5.04	19
519	5.04	9
520	5.04	19
521	5.04	13
522	5.04	27
523	5.04	25
524	5.04	15
525	5.04	11
526	5.04	13
527	5.04	13
528	5.04	17
529	5.04	11
530	5.04	11
531	5.04	13
532	5.04	21
533	5.04	25
534	5.04	46
535	5.04	16
536	5.04	23
537	5.04	13
538	5.04	16
539	5.04	13
540	5.04	19
541	5.04	14
542	5.04	10
543	5.04	19
544	5.04	11
545	5.04	15
546	5.04	17
547	5.04	10
548	5.04	19
549	5.04	11
550	5.04	19
551	5.04	11
552	5.04	33
553	5.04	21
554	5.04	10
555	5.04	33
556	5.04	26
557	5.04	15
558	5.04	18
559	5.04	19
560	5.04	19
561	5.04	11
562	5.04	19
563	5.04	11
564	5.04	18
565	5.04	11
566	5.04	31
567	5.04	12
568	5.04	24
569	5.04	22
570	5.04	12
571	5.04	9
572	5.04	9
573	5.04	10
574	5.04	18
575	5.04	15
576	5.04	17
577	5.04	19
578	5.04	30
579	5.04	13
580	5.04	21
581	5.04	17
582	5.04	14
583	5.04	13
584	5.04	19
585	5.04	28
586	5.04	26
587	5.04	10
588	5.04	13
589	5.04	18
590	5.04	15
591	5.04	14
592	5.04	22
593	5.04	14
594	5.04	18
595	5.04	14
596	5.04	12
597	5.04	17
598	5.04	29
599	5.04	9
600	5.04	14
601	5.04	13
602	5.04	16
603	5.04	14
604	5.04	12
605	5.04	20
606	5.04	28
607	5.04	17
608	5.04	16
609	5.04	15
610	5.04	27
611	5.04	14
612	5.04	13
613	5.04	14
614	5.04	11
615	5.04	49
616	5.04	16
617	5.04	34
618	5.04	19
619	5.04	9
620	5.04	19
621	5.04	13
622	5.04	27
623	5.04	25
624	5.04	15
625	5.04	11
626	5.04	13
627	5.04	13
628	5.04	17
629	5.04	11
630	5.04	11
631	5.04	13
632	5.04	21
633	5.04	25
634	5.04	46
635	5.04	16
636	5.04	23
637	5.04	13
638	5.04	16
639	5.04	13
640	5.04	19
641	5.04	14
642	5.04	10
643	5.04	19
644	5.04	11
645	5.04	15
646	5.04	17
647	5.04	10
648	5.04	19
649	5.04	11
650	5.04	19
651	5.04	11
652	5.04	33
653	5.04	21
654	5.04	10
655	5.04	33
656	5.04	26
657	5.04	15
658	5.04	18
659	5.04	19
660	5.04	19
661	5.04	11
662	5.04	19
663	5.04	11
664	5.04	18
665	5.04	11
666	5.04	31
667	5.04	12
668	5.04	24
669	5.04	22
670	5.04	12
671	5.04	9
672	5.04	9
673	5.04	10
674	5.04	18
675	5.04	15
676	5.04	17
677	5.04	19
678	5.04	30
679	5.04	13
680	5.04	21
681	5.04	17
682	5.04	14
683	5.04	13
684	5.04	19
685	5.04	28
686	5.04	26
687	5.04	10
688	5.04	13
689	5.04	18
690	5.04	15
691	5.04	14
692	5.04	22
693	5.04	14
694	5.04	18
695	5.04	14
696	5.04	12
697	5.04	17
698	5.04	29
699	5.04	9
700	5.04	14
701	5.04	13
702	5.04	16
703	5.04	14
704	5.04	12
705	5.04	20
706	5.04	28
707	5.04	17
708	5.04	16
709	5.04	15
710	5.04	27
711	5.04	14
712	5.04	13
713	5.04	14
714	5.04	11
715	5.04	49
716	5.04	16
717	5.04	34
718	5.04	19
719	5.04	9
720	5.04	19
721	5.04	13
722	5.04	27
723	5.04	25
724	5.04	15
725	5.04	11
726	5.04	13
727	5.04	13
728	5.04	17
729	5.04	11
730	5.04	11
731	5.04	13
732	5.04	21
733	5.04	25
734	5.04	46
735	5.04	16
736	5.04	23
737	5.04	13
738	5.04	16
739	5.04	13
740	5.04	19
741	5.04	14
742	5.04	10
743	5.04	19
744	5.04	11
745	5.04	15
746	5.04	17
747	5.04	10
748	5.04	19
749	5.04	11
750	5.04	19
751	5.04	11
752	5.04	33
753	5.04	21
754	5.04	10
755	5.04	33
756	5.04	26
757	5.04	15
758	5.04	18
759	5.04	19
760	5.04	19
761	5.04	11
762	5.04	19
763	5.04	11
764	5.04	18
765	5.04	11
766	5.04	31
767	5.04	12
768	5.04	24
769	5.04	22
770	5.04	12
771	5.04	9
772	5.04	9
773	5.04	10
774	5.04	18
775	5.04	15
776	5.04	17
777	5.04	19
778	5.04	30
779	5.04	13
780	5.04	21
781	5.04	17
782	5.04	14
783	5.04	13
784	5.04	19
785	5.04	28
786	5.04	26
787	5.04	10
788	5.04	13
789	5.04	18
790	5.04	15
791	5.04	14
792	5.04	22
793	5.04	14
794	5.04	18
795	5.04	14
796	5.04	12
797	5.04	17
798	5.04	29
799	5.04	9
800	5.04	14
801	5.04	13
802	5.04	16
803	5.04	14
804	5.04	12
805	5.04	20
806	5.04	28
807	5.04	17
808	5.04	16
809	5.04	15
810	5.04	27
811	5.04	14
812	5.04	13
813	5.04	14
814	5.04	11
815	5.04	49
816	5.04	16
817	5.04	34
818	5.04	19
819	5.04	9
820	5.04	19
821	5.04	13
822	5.04	27
823	5.04	25
824	5.04	15
825	5.04	11
826	5.04	13
827	5.04	13
828	5.04	17
829	5.04	11
830	5.04	11
831	5.04	13
832	5.04	21
833	5.04	25
834	5.04	46
835	5.04	16
836	5.04	23
837	5.04	13
838	5.04	16
839	5.04	13
840	5.04	19
841	5.04	14
842	5.04	10
843	5.04	19
844	5.04	11
845	5.04	15
846	5.04	17
847	5.04	10
848	5.04	19
849	5.04	11
850	5.04	19
851	5.04	11
852	5.04	33
853	5.04	21
854	5.04	10
855	5.04	33
856	5.04	26
857	5.04	15
858	5.04	18
859	5.04	19
860	5.04	19
861	5.04	11
862	5.04	19
863	5.04	11
864	5.04	18
865	5.04	11
866	5.04	31
867	5.04	12
868	5.04	24
869	5.04	22
870	5.04	12
871	5.04	9
872	5.04	9
873	5.04	10
874	5.04	18
875	5.04	15
876	5.04	17
877	5.04	19
878	5.04	30
879	5.04	13
880	5.04	21
881	5.04	17
882	5.04	14
883	5.04	13
884	5.04	19
885	5.04	28
886	5.04	26
887	5.04	10
888	5.04	13
889	5.04	18
890	5.04	15
891	5.04	14
892	5.04	22
893	5.04	14
894	5.04	18
895	5.04	14
896	5.04	12
897	5.04	17
898	5.04	29
899	5.04	9
900	5.04	14
901	5.04	13
902	5.04	16
903	5.04	14
904	5.04	12
905	5.04	20
906	5.04	28
907	5.04	17
908	5.04	16
909	5.04	15
910	5.04	27
911	5.04	14
912	5.04	13
913	5.04	14
914	5.04	11
915	5.04	49
916	5.04	16
917	5.04	34
918	5.04	19
919	5.04	9
920	5.04	19
921	5.04	13
922	5.04	27
923	5.04	25
924	5.04	15
925	5.04	11
926	5.04	13
927	5.04	13
928	5.04	17
929	5.04	11
930	5.04	11
931	5.04	13
932	5.04	21
933	5.04	25
934	5.04	46
935	5.04	16
936	5.04	23
937	5.04	13
938	5.04	16
939	5.04	13
940	5.04	19
941	5.04	14
942	5.04	10
943	5.04	19
944	5.04	11
945	5.04	15
946	5.04	17
947	5.04	10
948	5.04	19
949	5.04	11
950	5.04	19
951	5.04	11
952	5.04	33
953	5.04	21
954	5.04	10
955	5.04	33
956	5.04	26
957	5.04	15
958	5.04	18
959	5.04	19
960	5.04	19
961	5.04	11
962	5.04	19
963	5.04	11
964	5.04	18
965	5.04	11
966	5.04	31
967	5.04	12
968	5.04	24
969	5.04	22
970	5.04	12
971	5.04	9
972	5.04	9
973	5.04	10
974	5.04	18
975	5.04	15
976	5.04	17
977	5.04	19
978	5.04	30
979	5.04	13
980	5.04	21
981	5.04	17
982	5.04	14
983	5.04	13
984	5.04	19
985	5.04	28
986	5.04	26
987	5.04	10
988	5.04	13
989	5.04	18
990	5.04	15
991	5.04	14
992	5.04	22
993	5.04	14
994	5.04	18
995	5.04	14
996	5.04	12
997	5.04	17
998	5.04	29
999	5.04	9
1000	5.04	14
1001	5.04	13
1002	5.04	16
1003	5.04	14
1004	5.04	12
1005	5.04	20
1006	5.04	28
1007	5.04	17
1008	5.04	16
1009	5.04	15
1010	5.04	27
1011	5.04	14
1012	5.04	13
1013	5.04	14
1014	5.04	11
1015	5.04	49
1016	5.04	16
1017	5.04	34
1018	5.04	19
1019	5.04	9
1020	5.04	19
1021	5.04	13
1022	5.04	27
1023	5.04	25
1024	5.04	15
1025	5.04	11
1026	5.04	13
1027	5.04	13
1028	5.04	17
1029	5.04	11
1030	5.04	11
1031	5.04	13
1032	5.04	21
1033	5.04	25
1034	5.04	46
1035	5.04	16
1036	5.04	23
1037	5.04	13
1038	5.04	16
1039	5.04	13
1040	5.04	19
1041	5.04	14
1042	5.04	10
1043	5.04	19
1044	5.04	11
1045	5.04	15
1046	5.04	17
1047	5.04	10
1048	5.04	19
1049	5.04	11
1050	5.04	19
1051	5.04	11
1052	5.04	33
1053	5.04	21
1054	5.04	10
1055	5.04	33
1056	5.04	26
1057	5.04	15
1058	5.04	18
1059	5.04	19
1060	5.04	19
1061	5.04	11
1062	5.04	19
1063	5.04	11
1064	5.04	18
1065	5.04	11
1066	5.04	31
1067	5.04	12
1068	5.04	24
1069	5.04	22
1070	5.04	12
1071	5.04	9
1072	5.04	9
1073	5.04	10
1074	5.04	18
1075	5.04	15
1076	5.04	17
1077	5.04	19
1078	5.04	30
1079	5.04	13
1080	5.04	21
1081	5.04	17
1082	5.04	14
1083	5.04	13
1084	5.04	19
1085	5.04	28
1086	5.04	26
1087	5.04	10
1088	5.04	13
1089	5.04	18
1090	5.04	15
1091	5.04	14
1092	5.04	22
1093	5.04	14
1094	5.04	18
1095	5.04	14
1096	5.04	12
1097	5.04	17
1098	5.04	29
1099	5.04	9
1100	5.04	14
1101	5.04	13
1102	5.04	16
1103	5.04	14
1104	5.04	12
1105	5.04	20
1106	5.04	28
1107	5.04	17
1108	5.04	16
1109	5.04	15
1110	5.04	27
1111	5.04	14
1112	5.04	13
1113	5.04	14
1114	5.04	11
1115	5.04	49
1116	5.04	16
1117	5.04	34
1118	5.04	19
1119	5.04	9
1120	5.04	19
1121	5.04	13
1122	5.04	27
1123	5.04	25
1124	5.04	15
1125	5.04	11
1126	5.04	13
1127	5.04	13
1128	5.04	17
1129	5.04	11
1130	5.04	11
1131	5.04	13
1132	5.04	21
1133	5.04	25
1134	5.04	46
1135	5.04	16
1136	5.04	23
1137	5.04	13
1138	5.04	16
1139	5.04	13
1140	5.04	19
1141	5.04	14
1142	5.04	10
1143	5.04	19
1144	5.04	11
1145	5.04	15
1146	5.04	17
1147	5.04	10
1148	5.04	19
1149	5.04	11
1150	5.04	19
1151	5.04	11
1152	5.04	33
1153	5.04	21
1154	5.04	10
1155	5.04	33
1156	5.04	26
1157	5.04	15
1158	5.04	18
1159	5.04	19
1160	5.04	19
1161	5.04	11
1162	5.04	19
1163	5.04	11
1164	5.04	18
1165	5.04	11
1166	5.04	31
1167	5.04	12
1168	5.04	24
1169	5.04	22
1170	5.04	12
1171	5.04	9
1172	5.04	9
1173	5.04	10
1174	5.04	18
1175	5.04	15
1176	5.04	17
1177	5.04	19
1178	5.04	30
1179	5.04	13
1180	5.04	21
1181	5.04	17
1182	5.04	14
1183	5.04	13
1184	5.04	19
1185	5.04	28
1186	5.04	26
1187	5.04	10
1188	5.04	13
1189	5.04	18
1190	5.04	15
1191	5.04	14
1192	5.04	22
1193	5.04	14
1194	5.04	18
1195	5.04	14
1196	5.04	12
1197	5.04	17
1198	5.04	29
1199	5.04	9
1200	5.04	14
1201	5.04	13
1202	5.04	16
1203	5.04	14
1204	5.04	12
1205	5.04	20
1206	5.04	28
1207	5.04	17
1208	5.04	16
1209	5.04	15
1210	5.04	27
1211	5.04	14
1212	5.04	13
1213	5.04	14
1214	5.04	11
1215	5.04	49
1216	5.04	16
1217	5.04	34
1218	5.04	19
1219	5.04	9
1220	5.04	19
1221	5.04	13
1222	5.04	27
1223	5.04	25
1224	5.04	15
1225	5.04	11
1226	5.04	13
1227	5.04	13
1228	5.04	17
1229	5.04	11
1230	5.04	11
1231	5.04	13
1232	5.04	21
1233	5.04	25
1234	5.04	46
1235	5.04	16
1236	5.04	23
1237	5.04	13
1238	5.04	16
1239	5.04	13
1240	5.04	19
1241	5.04	14
1242	5.04	10
1243	5.04	19
1244	5.04	11
1245	5.04	15
1246	5.04	17
1247	5.04	10
1248	5.04	19
1249	5.04	11
1250	5.04	19
1251	5.04	11
1252	5.04	33
1253	5.04	21
1254	5.04	10
1255	5.04	33
1256	5.04	26
1257	5.04	15
1258	5.04	18
1259	5.04	19
1260	5.04	19
1261	5.04	11
1262	5.04	19
1263	5.04	11
1264	5.04	18
1265	5.04	11
1266	5.04	31
1267	5.04	12
1268	5.04	24
1269	5.04	22
1270	5.04	12
1271	5.04	9
1272	5.04	9
1273	5.04	10
1274	5.04	18
1275	5.04	15
1276	5.04	17
1277	5.04	19
1278	5.04	30
1279	5.04	13
1280	5.04	21
1281	5.04	17
1282	5.04	14
1283	5.04	13
1284	5.04	19
1285	5.04	28
1286	5.04	26
1287	5.04	10
1288	5.04	13
1289	5.04	18
1290	5.04	15
1291	5.04	14
1292	5.04	22
1293	5.04	14
1294	5.04	18
1295	5.04	14
1296	5.04	12
1297	5.04	17
1298	5.04	29
1299	5.04	9
1300	5.04	14
1301	5.04	13
1302	5.04	16
1303	5.04	14
1304	5.04	12
1305	5.04	20
1306	5.04	28
1307	5.04	17
1308	5.04	16
1309	5.04	15
1310	5.04	27
1311	5.04	14
1312	5.04	13
1313	5.04	14
1314	5.04	11
1315	5.04	49
1316	5.04	16
1317	5.04	34
1318	5.04	19
1319	5.04	9
1320	5.04	19
1321	5.04	13
1322	5.04	27
1323	5.04	25
1324	5.04	15
1325	5.04	11
1326	5.04	13
1327	5.04	13
1328	5.04	17
1329	5.04	11
1330	5.04	11
1331	5.04	13
1332	5.04	21
1333	5.04	25
1334	5.04	46
1335	5.04	16
1336	5.04	23
1337	5.04	13
1338	5.04	16
1339	5.04	13
1340	5.04	19
1341	5.04	14
1342	5.04	10
1343	5.04	19
1344	5.04	11
1345	5.04	15
1346	5.04	17
1347	5.04	10
1348	5.04	19
1349	5.04	11
1350	5.04	19
1351	5.04	11
1352	5.04	33
1353	5.04	21
1354	5.04	10
1355	5.04	33
1356	5.04	26
1357	5.04	15
1358	5.04	18
1359	5.04	19
1360	5.04	19
1361	5.04	11
1362	5.04	19
1363	5.04	11
1364	5.04	18
1365	5.04	11
1366	5.04	31
1367	5.04	12
1368	5.04	24
1369	5.04	22
1370	5.04	12
1371	5.04	9
1372	5.04	9
1373	5.04	10
1374	5.04	18
1375	5.04	15
1376	5.04	17
1377	5.04	19
1378	5.04	30
1379	5.04	13
1380	5.04	21
1381	5.04	17
1382	5.04	14
1383	5.04	13
1384	5.04	19
1385	5.04	28
1386	5.04	26
1387	5.04	10
1388	5.04	13
1389	5.04	18
1390	5.04	15
1391	5.04	14
1392	5.04	22
1393	5.04	14
1394	5.04	18
1395	5.04	14
1396	5.04	12
1397	5.04	17
1398	5.04	29
1399	5.04	9
1400	5.04	14
1401	5.04	13
1402	5.04	16
1403	5.04	14
1404	5.04	12
1405	5.04	20
1406	5.04	28
1407	5.04	17
1408	5.04	16
1409	5.04	15
1410	5.04	27
1411	5.04	14
1412	5.04	13
1413	5.04	14
1414	5.04	11
1415	5.04	49
1416	5.04	16
1417	5.04	34
1418	5.04	19
1419	5.04	9
1420	5.04	19
1421	5.04	13
1422	5.04	27
1423	5.04	25
1424	5.04	15
1425	5.04	11
1426	5.04	13
1427	5.04	13
1428	5.04	17
1429	5.04	11
1430	5.04	11
1431	5.04	13
1432	5.04	21
1433	5.04	25
1434	5.04	46
1435	5.04	16
1436	5.04	23
1437	5.04	13
1438	5.04	16
1439	5.04	13
1440	5.04	19
1441	5.04	14
1442	5.04	10
1443	5.04	19
1444	5.04	11
1445	5.04	15
1446	5.04	17
1447	5.04	10
1448	5.04	19
1449	5.04	11
1450	5.04	19
1451	5.04	11
1452	5.04	33
1453	5.04	21
1454	5.04	10
1455	5.04	33
1456	5.04	26
1457	5.04	15
1458	5.04	18
1459	5.04	19
1460	5.04	19
1461	5.04	11
1462	5.04	19
1463	5.04	11
1464	5.04	18
1465	5.04	11
1466	5.04	31
1467	5.04	12
1468	5.04	24
1469	5.04	22
1470	5.04	12
1471	5.04	9
1472	5.04	9
1473	5.04	10
1474	5.04	18
1475	5.04	15
1476	5.04	17
1477	5.04	19
1478	5.04	30
1479	5.04	13
1480	5.04	21
1481	5.04	17
1482	5.04	14
1483	5.04	13
1484	5.04	19
1485	5.04	28
1486	5.04	26
1487	5.04	10
1488	5.04	13
1489	5.04	18
1490	5.04	15
1491	5.04	14
1492	5.04	22
1493	5.04	14
1494	5.04	18
1495	5.04	14
1496	5.04	12
1497	5.04	17
1498	5.04	29
1499	5.04	9
1500	5.04	14
1501	5.04	13
1502	5.04	16
1503	5.04	14
1504	5.04	12
1505	5.04	20
1506	5.04	28
1507	5.04	17
1508	5.04	16
1509	5.04	15
1510	5.04	27
1511	5.04	14
1512	5.04	13
1513	5.04	14
1514	5.04	11
1515	5.04	49
1516	5.04	16
1517	5.04	34
1518	5.04	19
1519	5.04	9
1520	5.04	19
1521	5.04	13
1522	5.04	27
1523	5.04	25
1524	5.04	15
1525	5.04	11
1526	5.04	13
1527	5.04	13
1528	5.04	17
1529	5.04	11
1530	5.04	11
1531	5.04	13
1532	5.04	21
1533	5.04	25
1534	5.04	46
1535	5.04	16
1536	5.04	23
1537	5.04	13
1538	5.04	16
1539	5.04	13
1540	5.04	19
1541	5.04	14
1542	5.04	10
1543	5.04	19
1544	5.04	11
1545	5.04	15
1546	5.04	17
1547	5.04	10
1548	5.04	19
1549	5.04	11
1550	5.04	19
1551	5.04	11
1552	5.04	33
1553	5.04	21
1554	5.04	10
1555	5.04	33
1556	5.04	26
1557	5.04	15
1558	5.04	18
1559	5.04	19
1560	5.04	19
1561	5.04	11
1562	5.04	19
1563	5.04	11
1564	5.04	18
1565	5.04	11
1566	5.04	31
1567	5.04	12
1568	5.04	24
1569	5.04	22
1570	5.04	12
1571	5.04	9
1572	5.04	9
1573	5.04	10
1574	5.04	18
1575	5.04	15
1576	5.04	17
1577	5.04	19
1578	5.04	30
1579	5.04	13
1580	5.04	21
1581	5.04	17
1582	5.04	14
1583	5.04	13
1584	5.04	19
1585	5.04	28
1586	5.04	26
1587	5.04	10
1588	5.04	13
1589	5.04	18
1590	5.04	15
1591	5.04	14
1592	5.04	22
1593	5.04	14
1594	5.04	18
1595	5.04	14
1596	5.04	12
1597	5.04	17
1598	5.04	29
1599	5.04	9
1600	5.04	14
1601	5.04	13
1602	5.04	16
1603	5.04	14
1604	5.04	12
1605	5.04	20
1606	5.04	28
1607	5.04	17
1608	5.04	16
1609	5.04	15
1610	5.04	27
1611	5.04	14
1612	5.04	13
1613	5.04	14
1614	5.04	11
1615	5.04	49
1616	5.04	16
1617	5.04	34
1618	5.04	19
1619	5.04	9
1620	5.04	19
1621	5.04	13
1622	5.04	27
1623	5.04	25
1624	5.04	15
1625	5.04	11
1626	5.04	13
1627	5.04	13
1628	5.04	17
1629	5.04	11
1630	5.04	11
1631	5.04	13
1632	5.04	21
1633	5.04	25
1634	5.04	46
1635	5.04	16
1636	5.04	23
1637	5.04	13
1638	5.04	16
1639	5.04	13
1640	5.04	19
1641	5.04	14
1642	5.04	10
1643	5.04	19
1644	5.04	11
1645	5.04	15
1646	5.04	17
1647	5.04	10
1648	5.04	19
1649	5.04	11
1650	5.04	19
1651	5.04	11
1652	5.04	33
1653	5.04	21
1654	5.04	10
1655	5.04	33
1656	5.04	26
1657	5.04	15
1658	5.04	18
1659	5.04	19
1660	5.04	19
1661	5.04	11
1662	5.04	19
1663	5.04	11
1664	5.04	18
1665	5.04	11
1666	5.04	31
1667	5.04	12
1668	5.04	24
1669	5.04	22
1670	5.04	12
1671	5.04	9
1672	5.04	9
1673	5.04	10
1674	5.04	18
1675	5.04	15
1676	5.04	17
1677	5.04	19
1678	5.04	30
1679	5.04	13
1680	5.04	21
1681	5.04	17
1682	5.04	14
1683	5.04	13
1684	5.04	19
1685	5.04	28
1686	5.04	26
1687	5.04	10
1688	5.04	13
1689	5.04	18
1690	5.04	15
1691	5.04	14
1692	5.04	22
1693	5.04	14
1694	5.04	18
1695	5.04	14
1696	5.04	12
1697	5.04	17
1698	5.04	29
1699	5.04	9
1700	5.04	14
1701	5.04	13
1702	5.04	16
1703	5.04	14
1704	5.04	12
1705	5.04	20
1706	5.04	28
1707	5.04	17
1708	5.04	16
1709	5.04	15
1710	5.04	27
1711	5.04	14
1712	5.04	13
1713	5.04	14
1714	5.04	11
1715	5.04	49
1716	5.04	16
1717	5.04	34
1718	5.04	19
1719	5.04	9
1720	5.04	19
1721	5.04	13
1722	5.04	27
1723	5.04	25
1724	5.04	15
1725	5.04	11
1726	5.04	13
1727	5.04	13
1728	5.04	17
1729	5.04	11
1730	5.04	11
1731	5.04	13
1732	5.04	21
1733	5.04	25
1734	5.04	46
1735	5.04	16
1736	5.04	23
1737	5.04	13
1738	5.04	16
1739	5.04	13
1740	5.04	19
1741	5.04	14
1742	5.04	10
1743	5.04	19
1744	5.04	11
1745	5.04	15
1746	5.04	17
1747	5.04	10
1748	5.04	19
1749	5.04	11
1750	5.04	19
1751	5.04	11
1752	5.04	33
1753	5.04	21
1754	5.04	10
1755	5.04	33
1756	5.04	26
1757	5.04	15
1758	5.04	18
1759	5.04	19
1760	5.04	19
1761	5.04	11
1762	5.04	19
1763	5.04	11
1764	5.04	18
1765	5.04	11
1766	5.04	31
1767	5.04	12
1768	5.04	24
1769	5.04	22
1770	5.04	12
1771	5.04	9
1772	5.04	9
1773	5.04	10
1774	5.04	18
1775	5.04	15
1776	5.04	17
1777	5.04	19
1778	5.04	30
1779	5.04	13
1780	5.04	21
1781	5.04	17
1782	5.04	14
1783	5.04	13
1784	5.04	19
1785	5.04	28
1786	5.04	26
1787	5.04	10
1788	5.04	13
1789	5.04	18
1790	5.04	15
1791	5.04	14
1792	5.04	22
1793	5.04	14
1794	5.04	18
1795	5.04	14
1796	5.04	12
1797	5.04	17
1798	5.04	29
1799	5.04	9
1800	5.04	14
1801	5.04	13
1802	5.04	16
1803	5.04	14
1804	5.04	12
1805	5.04	20
1806	5.04	28
1807	5.04	17
1808	5.04	16
1809	5.04	15
1810	5.04	27
1811	5.04	14
1812	5.04	13
1813	5.04	14
1814	5.04	11
1815	5.04	49
1816	5.04	16
1817	5.04	34
1818	5.04	19
1819	5.04	9
1820	5.04	19
1821	5.04	13
1822	5.04	27
1823	5.04	25
1824	5.04	15
1825	5.04	11
1826	5.04	13
1827	5.04	13
1828	5.04	17
1829	5.04	11
1830	5.04	11
1831	5.04	13
1832	5.04	21
1833	5.04	25
1834	5.04	46
1835	5.04	16
1836	5.04	23
1837	5.04	13
1838	5.04	16
1839	5.04	13
1840	5.04	19
1841	5.04	14
1842	5.04	10
1843	5.04	19
1844	5.04	11
1845	5.04	15
1846	5.04	17
1847	5.04	10
1848	5.04	19
1849	5.04	11
1850	5.04	19
1851	5.04	11
1852	5.04	33
1853	5.04	21
1854	5.04	10
1855	5.04	33
1856	5.04	26
1857	5.04	15
1858	5.04	18
1859	5.04	19
1860	5.04	19
1861	5.04	11
1862	5.04	19
1863	5.04	11
1864	5.04	18
1865	5.04	11
1866	5.04	31
1867	5.04	12
1868	5.04	24
1869	5.04	22
1870	5.04	12
1871	5.04	9
1872	5.04	9
1873	5.04	10
1874	5.04	18
1875	5.04	15
1876	5.04	17
1877	5.04	19
1878	5.04	30
1879	5.04	13
1880	5.04	21
1881	5.04	17
1882	5.04	14
1883	5.04	13
1884	5.04	19
1885	5.04	28
1886	5.04	26
1887	5.04	10
1888	5.04	13
1889	5.04	18
1890	5.04	15
1891	5.04	14
1892	5.04	22
1893	5.04	14
1894	5.04	18
1895	5.04	14
1896	5.04	12
1897	5.04	17
1898	5.04	29
1899	5.04	9
1900	5.04	14
1901	5.04	13
1902	5.04	16
1903	5.04	14
1904	5.04	12
1905	5.04	20
1906	5.04	28
1907	5.04	17
1908	5.04	16
1909	5.04	15
1910	5.04	27
1911	5.04	14
1912	5.04	13
1913	5.04	14
1914	5.04	11
1915	5.04	49
1916	5.04	16
1917	5.04	34
1918	5.04	19
1919	5.04	9
1920	5.04	19
1921	5.04	13
1922	5.04	27
1923	5.04	25
1924	5.04	15
1925	5.04	11
1926	5.04	13
1927	5.04	13
1928	5.04	17
1929	5.04	11
1930	5.04	11
1931	5.04	13
1932	5.04	21
1933	5.04	25
1934	5.04	46
1935	5.04	16
1936	5.04	23
1937	5.04	13
1938	5.04	16
1939	5.04	13
1940	5.04	19
1941	5.04	14
1942	5.04	10
1943	5.04	19
1944	5.04	11
1945	5.04	15
1946	5.04	17
1947	5.04	10
1948	5.04	19
1949	5.04	11
1950	5.04	19
1951	5.04	11
1952	5.04	33
1953	5.04	21
1954	5.04	10
1955	5.04	33
1956	5.04	26
1957	5.04	15
1958	5.04	18
1959	5.04	19
1960	5.04	19
1961	5.04	11
1962	5.04	19
1963	5.04	11
1964	5.04	18
1965	5.04	11
1966	5.04	31
1967	5.04	12
1968	5.04	24
1969	5.04	22
1970	5.04	12
1971	5.04	9
1972	5.04	9
1973	5.04	10
1974	5.04	18
1975	5.04	15
1976	5.04	17
1977	5.04	19
1978	5.04	30
1979	5.04	13
1980	5.04	21
1981	5.04	17
1982	5.04	14
1983	5.04	13
1984	5.04	19
1985	5.04	28
1986	5.04	26
1987	5.04	10
1988	5.04	13
1989	5.04	18
1990	5.04	15
1991	5.04	14
1992	5.04	22
1993	5.04	14
1994	5.04	18
1995	5.04	14
1996	5.04	12
1997	5.04	17
1998	5.04	29
[truncated: 98,001 more rows]
