# Supplementary material
Source: ML conference proceedings conference paper supplement (https://proceedings.neurips.cc/paper_files/paper/2022/hash/9d3faa41886997cfc2128b930077fa49-Abstract.html)
Supplement: Supplementary file 1 [file 9d3faa41886997cfc2128b930077fa49-Supplemental-Conference.zip › code/src/data_hawkes/lower_hawkes.csv]

	Group	Number of Counterfactuals
0	5.04	9
1	5.04	9
2	5.04	9
3	5.04	7
4	5.04	8
5	5.04	8
6	5.04	9
7	5.04	8
8	5.04	7
9	5.04	7
10	5.04	6
11	5.04	9
12	5.04	9
13	5.04	8
14	5.04	7
15	5.04	8
16	5.04	8
17	5.04	8
18	5.04	8
19	5.04	9
20	5.04	7
21	5.04	5
22	5.04	8
23	5.04	8
24	5.04	8
25	5.04	7
26	5.04	7
27	5.04	7
28	5.04	6
29	5.04	7
30	5.04	8
31	5.04	5
32	5.04	8
33	5.04	9
34	5.04	9
35	5.04	7
36	5.04	6
37	5.04	8
38	5.04	6
39	5.04	8
40	5.04	8
41	5.04	8
42	5.04	8
43	5.04	9
44	5.04	6
45	5.04	7
46	5.04	8
47	5.04	7
48	5.04	7
49	5.04	8
50	5.04	7
51	5.04	8
52	5.04	7
53	5.04	8
54	5.04	9
55	5.04	6
56	5.04	7
57	5.04	8
58	5.04	6
59	5.04	5
60	5.04	6
61	5.04	9
62	5.04	7
63	5.04	9
64	5.04	9
65	5.04	8
66	5.04	8
67	5.04	6
68	5.04	9
69	5.04	7
70	5.04	5
71	5.04	6
72	5.04	9
73	5.04	9
74	5.04	6
75	5.04	9
76	5.04	7
77	5.04	8
78	5.04	8
79	5.04	8
80	5.04	8
81	5.04	8
82	5.04	7
83	5.04	9
84	5.04	8
85	5.04	8
86	5.04	8
87	5.04	8
88	5.04	8
89	5.04	7
90	5.04	9
91	5.04	9
92	5.04	9
93	5.04	6
94	5.04	8
95	5.04	8
96	5.04	6
97	5.04	8
98	5.04	6
99	5.04	7
100	5.04	9
101	5.04	9
102	5.04	9
103	5.04	7
104	5.04	8
105	5.04	8
106	5.04	9
107	5.04	8
108	5.04	7
109	5.04	7
110	5.04	6
111	5.04	9
112	5.04	9
113	5.04	8
114	5.04	7
115	5.04	8
116	5.04	8
117	5.04	8
118	5.04	8
119	5.04	9
120	5.04	7
121	5.04	5
122	5.04	8
123	5.04	8
124	5.04	8
125	5.04	7
126	5.04	7
127	5.04	7
128	5.04	6
129	5.04	7
130	5.04	8
131	5.04	5
132	5.04	8
133	5.04	9
134	5.04	9
135	5.04	7
136	5.04	6
137	5.04	8
138	5.04	6
139	5.04	8
140	5.04	8
141	5.04	8
142	5.04	8
143	5.04	9
144	5.04	6
145	5.04	7
146	5.04	8
147	5.04	7
148	5.04	7
149	5.04	8
150	5.04	7
151	5.04	8
152	5.04	7
153	5.04	8
154	5.04	9
155	5.04	6
156	5.04	7
157	5.04	8
158	5.04	6
159	5.04	5
160	5.04	6
161	5.04	9
162	5.04	7
163	5.04	9
164	5.04	9
165	5.04	8
166	5.04	8
167	5.04	6
168	5.04	9
169	5.04	7
170	5.04	5
171	5.04	6
172	5.04	9
173	5.04	9
174	5.04	6
175	5.04	9
176	5.04	7
177	5.04	8
178	5.04	8
179	5.04	8
180	5.04	8
181	5.04	8
182	5.04	7
183	5.04	9
184	5.04	8
185	5.04	8
186	5.04	8
187	5.04	8
188	5.04	8
189	5.04	7
190	5.04	9
191	5.04	9
192	5.04	9
193	5.04	6
194	5.04	8
195	5.04	8
196	5.04	6
197	5.04	8
198	5.04	6
199	5.04	7
200	5.04	9
201	5.04	9
202	5.04	9
203	5.04	7
204	5.04	8
205	5.04	8
206	5.04	9
207	5.04	8
208	5.04	7
209	5.04	7
210	5.04	6
211	5.04	9
212	5.04	9
213	5.04	8
214	5.04	7
215	5.04	8
216	5.04	8
217	5.04	8
218	5.04	8
219	5.04	9
220	5.04	7
221	5.04	5
222	5.04	8
223	5.04	8
224	5.04	8
225	5.04	7
226	5.04	7
227	5.04	7
228	5.04	6
229	5.04	7
230	5.04	8
231	5.04	5
232	5.04	8
233	5.04	9
234	5.04	9
235	5.04	7
236	5.04	6
237	5.04	8
238	5.04	6
239	5.04	8
240	5.04	8
241	5.04	8
242	5.04	8
243	5.04	9
244	5.04	6
245	5.04	7
246	5.04	8
247	5.04	7
248	5.04	7
249	5.04	8
250	5.04	7
251	5.04	8
252	5.04	7
253	5.04	8
254	5.04	9
255	5.04	6
256	5.04	7
257	5.04	8
258	5.04	6
259	5.04	5
260	5.04	6
261	5.04	9
262	5.04	7
263	5.04	9
264	5.04	9
265	5.04	8
266	5.04	8
267	5.04	6
268	5.04	9
269	5.04	7
270	5.04	5
271	5.04	6
272	5.04	9
273	5.04	9
274	5.04	6
275	5.04	9
276	5.04	7
277	5.04	8
278	5.04	8
279	5.04	8
280	5.04	8
281	5.04	8
282	5.04	7
283	5.04	9
284	5.04	8
285	5.04	8
286	5.04	8
287	5.04	8
288	5.04	8
289	5.04	7
290	5.04	9
291	5.04	9
292	5.04	9
293	5.04	6
294	5.04	8
295	5.04	8
296	5.04	6
297	5.04	8
298	5.04	6
299	5.04	7
300	5.04	9
301	5.04	9
302	5.04	9
303	5.04	7
304	5.04	8
305	5.04	8
306	5.04	9
307	5.04	8
308	5.04	7
309	5.04	7
310	5.04	6
311	5.04	9
312	5.04	9
313	5.04	8
314	5.04	7
315	5.04	8
316	5.04	8
317	5.04	8
318	5.04	8
319	5.04	9
320	5.04	7
321	5.04	5
322	5.04	8
323	5.04	8
324	5.04	8
325	5.04	7
326	5.04	7
327	5.04	7
328	5.04	6
329	5.04	7
330	5.04	8
331	5.04	5
332	5.04	8
333	5.04	9
334	5.04	9
335	5.04	7
336	5.04	6
337	5.04	8
338	5.04	6
339	5.04	8
340	5.04	8
341	5.04	8
342	5.04	8
343	5.04	9
344	5.04	6
345	5.04	7
346	5.04	8
347	5.04	7
348	5.04	7
349	5.04	8
350	5.04	7
351	5.04	8
352	5.04	7
353	5.04	8
354	5.04	9
355	5.04	6
356	5.04	7
357	5.04	8
358	5.04	6
359	5.04	5
360	5.04	6
361	5.04	9
362	5.04	7
363	5.04	9
364	5.04	9
365	5.04	8
366	5.04	8
367	5.04	6
368	5.04	9
369	5.04	7
370	5.04	5
371	5.04	6
372	5.04	9
373	5.04	9
374	5.04	6
375	5.04	9
376	5.04	7
377	5.04	8
378	5.04	8
379	5.04	8
380	5.04	8
381	5.04	8
382	5.04	7
383	5.04	9
384	5.04	8
385	5.04	8
386	5.04	8
387	5.04	8
388	5.04	8
389	5.04	7
390	5.04	9
391	5.04	9
392	5.04	9
393	5.04	6
394	5.04	8
395	5.04	8
396	5.04	6
397	5.04	8
398	5.04	6
399	5.04	7
400	5.04	9
401	5.04	9
402	5.04	9
403	5.04	7
404	5.04	8
405	5.04	8
406	5.04	9
407	5.04	8
408	5.04	7
409	5.04	7
410	5.04	6
411	5.04	9
412	5.04	9
413	5.04	8
414	5.04	7
415	5.04	8
416	5.04	8
417	5.04	8
418	5.04	8
419	5.04	9
420	5.04	7
421	5.04	5
422	5.04	8
423	5.04	8
424	5.04	8
425	5.04	7
426	5.04	7
427	5.04	7
428	5.04	6
429	5.04	7
430	5.04	8
431	5.04	5
432	5.04	8
433	5.04	9
434	5.04	9
435	5.04	7
436	5.04	6
437	5.04	8
438	5.04	6
439	5.04	8
440	5.04	8
441	5.04	8
442	5.04	8
443	5.04	9
444	5.04	6
445	5.04	7
446	5.04	8
447	5.04	7
448	5.04	7
449	5.04	8
450	5.04	7
451	5.04	8
452	5.04	7
453	5.04	8
454	5.04	9
455	5.04	6
456	5.04	7
457	5.04	8
458	5.04	6
459	5.04	5
460	5.04	6
461	5.04	9
462	5.04	7
463	5.04	9
464	5.04	9
465	5.04	8
466	5.04	8
467	5.04	6
468	5.04	9
469	5.04	7
470	5.04	5
471	5.04	6
472	5.04	9
473	5.04	9
474	5.04	6
475	5.04	9
476	5.04	7
477	5.04	8
478	5.04	8
479	5.04	8
480	5.04	8
481	5.04	8
482	5.04	7
483	5.04	9
484	5.04	8
485	5.04	8
486	5.04	8
487	5.04	8
488	5.04	8
489	5.04	7
490	5.04	9
491	5.04	9
492	5.04	9
493	5.04	6
494	5.04	8
495	5.04	8
496	5.04	6
497	5.04	8
498	5.04	6
499	5.04	7
500	5.04	9
501	5.04	9
502	5.04	9
503	5.04	7
504	5.04	8
505	5.04	8
506	5.04	9
507	5.04	8
508	5.04	7
509	5.04	7
510	5.04	6
511	5.04	9
512	5.04	9
513	5.04	8
514	5.04	7
515	5.04	8
516	5.04	8
517	5.04	8
518	5.04	8
519	5.04	9
520	5.04	7
521	5.04	5
522	5.04	8
523	5.04	8
524	5.04	8
525	5.04	7
526	5.04	7
527	5.04	7
528	5.04	6
529	5.04	7
530	5.04	8
531	5.04	5
532	5.04	8
533	5.04	9
534	5.04	9
535	5.04	7
536	5.04	6
537	5.04	8
538	5.04	6
539	5.04	8
540	5.04	8
541	5.04	8
542	5.04	8
543	5.04	9
544	5.04	6
545	5.04	7
546	5.04	8
547	5.04	7
548	5.04	7
549	5.04	8
550	5.04	7
551	5.04	8
552	5.04	7
553	5.04	8
554	5.04	9
555	5.04	6
556	5.04	7
557	5.04	8
558	5.04	6
559	5.04	5
560	5.04	6
561	5.04	9
562	5.04	7
563	5.04	9
564	5.04	9
565	5.04	8
566	5.04	8
567	5.04	6
568	5.04	9
569	5.04	7
570	5.04	5
571	5.04	6
572	5.04	9
573	5.04	9
574	5.04	6
575	5.04	9
576	5.04	7
577	5.04	8
578	5.04	8
579	5.04	8
580	5.04	8
581	5.04	8
582	5.04	7
583	5.04	9
584	5.04	8
585	5.04	8
586	5.04	8
587	5.04	8
588	5.04	8
589	5.04	7
590	5.04	9
591	5.04	9
592	5.04	9
593	5.04	6
594	5.04	8
595	5.04	8
596	5.04	6
597	5.04	8
598	5.04	6
599	5.04	7
600	5.04	9
601	5.04	9
602	5.04	9
603	5.04	7
604	5.04	8
605	5.04	8
606	5.04	9
607	5.04	8
608	5.04	7
609	5.04	7
610	5.04	6
611	5.04	9
612	5.04	9
613	5.04	8
614	5.04	7
615	5.04	8
616	5.04	8
617	5.04	8
618	5.04	8
619	5.04	9
620	5.04	7
621	5.04	5
622	5.04	8
623	5.04	8
624	5.04	8
625	5.04	7
626	5.04	7
627	5.04	7
628	5.04	6
629	5.04	7
630	5.04	8
631	5.04	5
632	5.04	8
633	5.04	9
634	5.04	9
635	5.04	7
636	5.04	6
637	5.04	8
638	5.04	6
639	5.04	8
640	5.04	8
641	5.04	8
642	5.04	8
643	5.04	9
644	5.04	6
645	5.04	7
646	5.04	8
647	5.04	7
648	5.04	7
649	5.04	8
650	5.04	7
651	5.04	8
652	5.04	7
653	5.04	8
654	5.04	9
655	5.04	6
656	5.04	7
657	5.04	8
658	5.04	6
659	5.04	5
660	5.04	6
661	5.04	9
662	5.04	7
663	5.04	9
664	5.04	9
665	5.04	8
666	5.04	8
667	5.04	6
668	5.04	9
669	5.04	7
670	5.04	5
671	5.04	6
672	5.04	9
673	5.04	9
674	5.04	6
675	5.04	9
676	5.04	7
677	5.04	8
678	5.04	8
679	5.04	8
680	5.04	8
681	5.04	8
682	5.04	7
683	5.04	9
684	5.04	8
685	5.04	8
686	5.04	8
687	5.04	8
688	5.04	8
689	5.04	7
690	5.04	9
691	5.04	9
692	5.04	9
693	5.04	6
694	5.04	8
695	5.04	8
696	5.04	6
697	5.04	8
698	5.04	6
699	5.04	7
700	5.04	9
701	5.04	9
702	5.04	9
703	5.04	7
704	5.04	8
705	5.04	8
706	5.04	9
707	5.04	8
708	5.04	7
709	5.04	7
710	5.04	6
711	5.04	9
712	5.04	9
713	5.04	8
714	5.04	7
715	5.04	8
716	5.04	8
717	5.04	8
718	5.04	8
719	5.04	9
720	5.04	7
721	5.04	5
722	5.04	8
723	5.04	8
724	5.04	8
725	5.04	7
726	5.04	7
727	5.04	7
728	5.04	6
729	5.04	7
730	5.04	8
731	5.04	5
732	5.04	8
733	5.04	9
734	5.04	9
735	5.04	7
736	5.04	6
737	5.04	8
738	5.04	6
739	5.04	8
740	5.04	8
741	5.04	8
742	5.04	8
743	5.04	9
744	5.04	6
745	5.04	7
746	5.04	8
747	5.04	7
748	5.04	7
749	5.04	8
750	5.04	7
751	5.04	8
752	5.04	7
753	5.04	8
754	5.04	9
755	5.04	6
756	5.04	7
757	5.04	8
758	5.04	6
759	5.04	5
760	5.04	6
761	5.04	9
762	5.04	7
763	5.04	9
764	5.04	9
765	5.04	8
766	5.04	8
767	5.04	6
768	5.04	9
769	5.04	7
770	5.04	5
771	5.04	6
772	5.04	9
773	5.04	9
774	5.04	6
775	5.04	9
776	5.04	7
777	5.04	8
778	5.04	8
779	5.04	8
780	5.04	8
781	5.04	8
782	5.04	7
783	5.04	9
784	5.04	8
785	5.04	8
786	5.04	8
787	5.04	8
788	5.04	8
789	5.04	7
790	5.04	9
791	5.04	9
792	5.04	9
793	5.04	6
794	5.04	8
795	5.04	8
796	5.04	6
797	5.04	8
798	5.04	6
799	5.04	7
800	5.04	9
801	5.04	9
802	5.04	9
803	5.04	7
804	5.04	8
805	5.04	8
806	5.04	9
807	5.04	8
808	5.04	7
809	5.04	7
810	5.04	6
811	5.04	9
812	5.04	9
813	5.04	8
814	5.04	7
815	5.04	8
816	5.04	8
817	5.04	8
818	5.04	8
819	5.04	9
820	5.04	7
821	5.04	5
822	5.04	8
823	5.04	8
824	5.04	8
825	5.04	7
826	5.04	7
827	5.04	7
828	5.04	6
829	5.04	7
830	5.04	8
831	5.04	5
832	5.04	8
833	5.04	9
834	5.04	9
835	5.04	7
836	5.04	6
837	5.04	8
838	5.04	6
839	5.04	8
840	5.04	8
841	5.04	8
842	5.04	8
843	5.04	9
844	5.04	6
845	5.04	7
846	5.04	8
847	5.04	7
848	5.04	7
849	5.04	8
850	5.04	7
851	5.04	8
852	5.04	7
853	5.04	8
854	5.04	9
855	5.04	6
856	5.04	7
857	5.04	8
858	5.04	6
859	5.04	5
860	5.04	6
861	5.04	9
862	5.04	7
863	5.04	9
864	5.04	9
865	5.04	8
866	5.04	8
867	5.04	6
868	5.04	9
869	5.04	7
870	5.04	5
871	5.04	6
872	5.04	9
873	5.04	9
874	5.04	6
875	5.04	9
876	5.04	7
877	5.04	8
878	5.04	8
879	5.04	8
880	5.04	8
881	5.04	8
882	5.04	7
883	5.04	9
884	5.04	8
885	5.04	8
886	5.04	8
887	5.04	8
888	5.04	8
889	5.04	7
890	5.04	9
891	5.04	9
892	5.04	9
893	5.04	6
894	5.04	8
895	5.04	8
896	5.04	6
897	5.04	8
898	5.04	6
899	5.04	7
900	5.04	9
901	5.04	9
902	5.04	9
903	5.04	7
904	5.04	8
905	5.04	8
906	5.04	9
907	5.04	8
908	5.04	7
909	5.04	7
910	5.04	6
911	5.04	9
912	5.04	9
913	5.04	8
914	5.04	7
915	5.04	8
916	5.04	8
917	5.04	8
918	5.04	8
919	5.04	9
920	5.04	7
921	5.04	5
922	5.04	8
923	5.04	8
924	5.04	8
925	5.04	7
926	5.04	7
927	5.04	7
928	5.04	6
929	5.04	7
930	5.04	8
931	5.04	5
932	5.04	8
933	5.04	9
934	5.04	9
935	5.04	7
936	5.04	6
937	5.04	8
938	5.04	6
939	5.04	8
940	5.04	8
941	5.04	8
942	5.04	8
943	5.04	9
944	5.04	6
945	5.04	7
946	5.04	8
947	5.04	7
948	5.04	7
949	5.04	8
950	5.04	7
951	5.04	8
952	5.04	7
953	5.04	8
954	5.04	9
955	5.04	6
956	5.04	7
957	5.04	8
958	5.04	6
959	5.04	5
960	5.04	6
961	5.04	9
962	5.04	7
963	5.04	9
964	5.04	9
965	5.04	8
966	5.04	8
967	5.04	6
968	5.04	9
969	5.04	7
970	5.04	5
971	5.04	6
972	5.04	9
973	5.04	9
974	5.04	6
975	5.04	9
976	5.04	7
977	5.04	8
978	5.04	8
979	5.04	8
980	5.04	8
981	5.04	8
982	5.04	7
983	5.04	9
984	5.04	8
985	5.04	8
986	5.04	8
987	5.04	8
988	5.04	8
989	5.04	7
990	5.04	9
991	5.04	9
992	5.04	9
993	5.04	6
994	5.04	8
995	5.04	8
996	5.04	6
997	5.04	8
998	5.04	6
999	5.04	7
1000	5.04	9
1001	5.04	9
1002	5.04	9
1003	5.04	7
1004	5.04	8
1005	5.04	8
1006	5.04	9
1007	5.04	8
1008	5.04	7
1009	5.04	7
1010	5.04	6
1011	5.04	9
1012	5.04	9
1013	5.04	8
1014	5.04	7
1015	5.04	8
1016	5.04	8
1017	5.04	8
1018	5.04	8
1019	5.04	9
1020	5.04	7
1021	5.04	5
1022	5.04	8
1023	5.04	8
1024	5.04	8
1025	5.04	7
1026	5.04	7
1027	5.04	7
1028	5.04	6
1029	5.04	7
1030	5.04	8
1031	5.04	5
1032	5.04	8
1033	5.04	9
1034	5.04	9
1035	5.04	7
1036	5.04	6
1037	5.04	8
1038	5.04	6
1039	5.04	8
1040	5.04	8
1041	5.04	8
1042	5.04	8
1043	5.04	9
1044	5.04	6
1045	5.04	7
1046	5.04	8
1047	5.04	7
1048	5.04	7
1049	5.04	8
1050	5.04	7
1051	5.04	8
1052	5.04	7
1053	5.04	8
1054	5.04	9
1055	5.04	6
1056	5.04	7
1057	5.04	8
1058	5.04	6
1059	5.04	5
1060	5.04	6
1061	5.04	9
1062	5.04	7
1063	5.04	9
1064	5.04	9
1065	5.04	8
1066	5.04	8
1067	5.04	6
1068	5.04	9
1069	5.04	7
1070	5.04	5
1071	5.04	6
1072	5.04	9
1073	5.04	9
1074	5.04	6
1075	5.04	9
1076	5.04	7
1077	5.04	8
1078	5.04	8
1079	5.04	8
1080	5.04	8
1081	5.04	8
1082	5.04	7
1083	5.04	9
1084	5.04	8
1085	5.04	8
1086	5.04	8
1087	5.04	8
1088	5.04	8
1089	5.04	7
1090	5.04	9
1091	5.04	9
1092	5.04	9
1093	5.04	6
1094	5.04	8
1095	5.04	8
1096	5.04	6
1097	5.04	8
1098	5.04	6
1099	5.04	7
1100	5.04	9
1101	5.04	9
1102	5.04	9
1103	5.04	7
1104	5.04	8
1105	5.04	8
1106	5.04	9
1107	5.04	8
1108	5.04	7
1109	5.04	7
1110	5.04	6
1111	5.04	9
1112	5.04	9
1113	5.04	8
1114	5.04	7
1115	5.04	8
1116	5.04	8
1117	5.04	8
1118	5.04	8
1119	5.04	9
1120	5.04	7
1121	5.04	5
1122	5.04	8
1123	5.04	8
1124	5.04	8
1125	5.04	7
1126	5.04	7
1127	5.04	7
1128	5.04	6
1129	5.04	7
1130	5.04	8
1131	5.04	5
1132	5.04	8
1133	5.04	9
1134	5.04	9
1135	5.04	7
1136	5.04	6
1137	5.04	8
1138	5.04	6
1139	5.04	8
1140	5.04	8
1141	5.04	8
1142	5.04	8
1143	5.04	9
1144	5.04	6
1145	5.04	7
1146	5.04	8
1147	5.04	7
1148	5.04	7
1149	5.04	8
1150	5.04	7
1151	5.04	8
1152	5.04	7
1153	5.04	8
1154	5.04	9
1155	5.04	6
1156	5.04	7
1157	5.04	8
1158	5.04	6
1159	5.04	5
1160	5.04	6
1161	5.04	9
1162	5.04	7
1163	5.04	9
1164	5.04	9
1165	5.04	8
1166	5.04	8
1167	5.04	6
1168	5.04	9
1169	5.04	7
1170	5.04	5
1171	5.04	6
1172	5.04	9
1173	5.04	9
1174	5.04	6
1175	5.04	9
1176	5.04	7
1177	5.04	8
1178	5.04	8
1179	5.04	8
1180	5.04	8
1181	5.04	8
1182	5.04	7
1183	5.04	9
1184	5.04	8
1185	5.04	8
1186	5.04	8
1187	5.04	8
1188	5.04	8
1189	5.04	7
1190	5.04	9
1191	5.04	9
1192	5.04	9
1193	5.04	6
1194	5.04	8
1195	5.04	8
1196	5.04	6
1197	5.04	8
1198	5.04	6
1199	5.04	7
1200	5.04	9
1201	5.04	9
1202	5.04	9
1203	5.04	7
1204	5.04	8
1205	5.04	8
1206	5.04	9
1207	5.04	8
1208	5.04	7
1209	5.04	7
1210	5.04	6
1211	5.04	9
1212	5.04	9
1213	5.04	8
1214	5.04	7
1215	5.04	8
1216	5.04	8
1217	5.04	8
1218	5.04	8
1219	5.04	9
1220	5.04	7
1221	5.04	5
1222	5.04	8
1223	5.04	8
1224	5.04	8
1225	5.04	7
1226	5.04	7
1227	5.04	7
1228	5.04	6
1229	5.04	7
1230	5.04	8
1231	5.04	5
1232	5.04	8
1233	5.04	9
1234	5.04	9
1235	5.04	7
1236	5.04	6
1237	5.04	8
1238	5.04	6
1239	5.04	8
1240	5.04	8
1241	5.04	8
1242	5.04	8
1243	5.04	9
1244	5.04	6
1245	5.04	7
1246	5.04	8
1247	5.04	7
1248	5.04	7
1249	5.04	8
1250	5.04	7
1251	5.04	8
1252	5.04	7
1253	5.04	8
1254	5.04	9
1255	5.04	6
1256	5.04	7
1257	5.04	8
1258	5.04	6
1259	5.04	5
1260	5.04	6
1261	5.04	9
1262	5.04	7
1263	5.04	9
1264	5.04	9
1265	5.04	8
1266	5.04	8
1267	5.04	6
1268	5.04	9
1269	5.04	7
1270	5.04	5
1271	5.04	6
1272	5.04	9
1273	5.04	9
1274	5.04	6
1275	5.04	9
1276	5.04	7
1277	5.04	8
1278	5.04	8
1279	5.04	8
1280	5.04	8
1281	5.04	8
1282	5.04	7
1283	5.04	9
1284	5.04	8
1285	5.04	8
1286	5.04	8
1287	5.04	8
1288	5.04	8
1289	5.04	7
1290	5.04	9
1291	5.04	9
1292	5.04	9
1293	5.04	6
1294	5.04	8
1295	5.04	8
1296	5.04	6
1297	5.04	8
1298	5.04	6
1299	5.04	7
1300	5.04	9
1301	5.04	9
1302	5.04	9
1303	5.04	7
1304	5.04	8
1305	5.04	8
1306	5.04	9
1307	5.04	8
1308	5.04	7
1309	5.04	7
1310	5.04	6
1311	5.04	9
1312	5.04	9
1313	5.04	8
1314	5.04	7
1315	5.04	8
1316	5.04	8
1317	5.04	8
1318	5.04	8
1319	5.04	9
1320	5.04	7
1321	5.04	5
1322	5.04	8
1323	5.04	8
1324	5.04	8
1325	5.04	7
1326	5.04	7
1327	5.04	7
1328	5.04	6
1329	5.04	7
1330	5.04	8
1331	5.04	5
1332	5.04	8
1333	5.04	9
1334	5.04	9
1335	5.04	7
1336	5.04	6
1337	5.04	8
1338	5.04	6
1339	5.04	8
1340	5.04	8
1341	5.04	8
1342	5.04	8
1343	5.04	9
1344	5.04	6
1345	5.04	7
1346	5.04	8
1347	5.04	7
1348	5.04	7
1349	5.04	8
1350	5.04	7
1351	5.04	8
1352	5.04	7
1353	5.04	8
1354	5.04	9
1355	5.04	6
1356	5.04	7
1357	5.04	8
1358	5.04	6
1359	5.04	5
1360	5.04	6
1361	5.04	9
1362	5.04	7
1363	5.04	9
1364	5.04	9
1365	5.04	8
1366	5.04	8
1367	5.04	6
1368	5.04	9
1369	5.04	7
1370	5.04	5
1371	5.04	6
1372	5.04	9
1373	5.04	9
1374	5.04	6
1375	5.04	9
1376	5.04	7
1377	5.04	8
1378	5.04	8
1379	5.04	8
1380	5.04	8
1381	5.04	8
1382	5.04	7
1383	5.04	9
1384	5.04	8
1385	5.04	8
1386	5.04	8
1387	5.04	8
1388	5.04	8
1389	5.04	7
1390	5.04	9
1391	5.04	9
1392	5.04	9
1393	5.04	6
1394	5.04	8
1395	5.04	8
1396	5.04	6
1397	5.04	8
1398	5.04	6
1399	5.04	7
1400	5.04	9
1401	5.04	9
1402	5.04	9
1403	5.04	7
1404	5.04	8
1405	5.04	8
1406	5.04	9
1407	5.04	8
1408	5.04	7
1409	5.04	7
1410	5.04	6
1411	5.04	9
1412	5.04	9
1413	5.04	8
1414	5.04	7
1415	5.04	8
1416	5.04	8
1417	5.04	8
1418	5.04	8
1419	5.04	9
1420	5.04	7
1421	5.04	5
1422	5.04	8
1423	5.04	8
1424	5.04	8
1425	5.04	7
1426	5.04	7
1427	5.04	7
1428	5.04	6
1429	5.04	7
1430	5.04	8
1431	5.04	5
1432	5.04	8
1433	5.04	9
1434	5.04	9
1435	5.04	7
1436	5.04	6
1437	5.04	8
1438	5.04	6
1439	5.04	8
1440	5.04	8
1441	5.04	8
1442	5.04	8
1443	5.04	9
1444	5.04	6
1445	5.04	7
1446	5.04	8
1447	5.04	7
1448	5.04	7
1449	5.04	8
1450	5.04	7
1451	5.04	8
1452	5.04	7
1453	5.04	8
1454	5.04	9
1455	5.04	6
1456	5.04	7
1457	5.04	8
1458	5.04	6
1459	5.04	5
1460	5.04	6
1461	5.04	9
1462	5.04	7
1463	5.04	9
1464	5.04	9
1465	5.04	8
1466	5.04	8
1467	5.04	6
1468	5.04	9
1469	5.04	7
1470	5.04	5
1471	5.04	6
1472	5.04	9
1473	5.04	9
1474	5.04	6
1475	5.04	9
1476	5.04	7
1477	5.04	8
1478	5.04	8
1479	5.04	8
1480	5.04	8
1481	5.04	8
1482	5.04	7
1483	5.04	9
1484	5.04	8
1485	5.04	8
1486	5.04	8
1487	5.04	8
1488	5.04	8
1489	5.04	7
1490	5.04	9
1491	5.04	9
1492	5.04	9
1493	5.04	6
1494	5.04	8
1495	5.04	8
1496	5.04	6
1497	5.04	8
1498	5.04	6
1499	5.04	7
1500	5.04	9
1501	5.04	9
1502	5.04	9
1503	5.04	7
1504	5.04	8
1505	5.04	8
1506	5.04	9
1507	5.04	8
1508	5.04	7
1509	5.04	7
1510	5.04	6
1511	5.04	9
1512	5.04	9
1513	5.04	8
1514	5.04	7
1515	5.04	8
1516	5.04	8
1517	5.04	8
1518	5.04	8
1519	5.04	9
1520	5.04	7
1521	5.04	5
1522	5.04	8
1523	5.04	8
1524	5.04	8
1525	5.04	7
1526	5.04	7
1527	5.04	7
1528	5.04	6
1529	5.04	7
1530	5.04	8
1531	5.04	5
1532	5.04	8
1533	5.04	9
1534	5.04	9
1535	5.04	7
1536	5.04	6
1537	5.04	8
1538	5.04	6
1539	5.04	8
1540	5.04	8
1541	5.04	8
1542	5.04	8
1543	5.04	9
1544	5.04	6
1545	5.04	7
1546	5.04	8
1547	5.04	7
1548	5.04	7
1549	5.04	8
1550	5.04	7
1551	5.04	8
1552	5.04	7
1553	5.04	8
1554	5.04	9
1555	5.04	6
1556	5.04	7
1557	5.04	8
1558	5.04	6
1559	5.04	5
1560	5.04	6
1561	5.04	9
1562	5.04	7
1563	5.04	9
1564	5.04	9
1565	5.04	8
1566	5.04	8
1567	5.04	6
1568	5.04	9
1569	5.04	7
1570	5.04	5
1571	5.04	6
1572	5.04	9
1573	5.04	9
1574	5.04	6
1575	5.04	9
1576	5.04	7
1577	5.04	8
1578	5.04	8
1579	5.04	8
1580	5.04	8
1581	5.04	8
1582	5.04	7
1583	5.04	9
1584	5.04	8
1585	5.04	8
1586	5.04	8
1587	5.04	8
1588	5.04	8
1589	5.04	7
1590	5.04	9
1591	5.04	9
1592	5.04	9
1593	5.04	6
1594	5.04	8
1595	5.04	8
1596	5.04	6
1597	5.04	8
1598	5.04	6
1599	5.04	7
1600	5.04	9
1601	5.04	9
1602	5.04	9
1603	5.04	7
1604	5.04	8
1605	5.04	8
1606	5.04	9
1607	5.04	8
1608	5.04	7
1609	5.04	7
1610	5.04	6
1611	5.04	9
1612	5.04	9
1613	5.04	8
1614	5.04	7
1615	5.04	8
1616	5.04	8
1617	5.04	8
1618	5.04	8
1619	5.04	9
1620	5.04	7
1621	5.04	5
1622	5.04	8
1623	5.04	8
1624	5.04	8
1625	5.04	7
1626	5.04	7
1627	5.04	7
1628	5.04	6
1629	5.04	7
1630	5.04	8
1631	5.04	5
1632	5.04	8
1633	5.04	9
1634	5.04	9
1635	5.04	7
1636	5.04	6
1637	5.04	8
1638	5.04	6
1639	5.04	8
1640	5.04	8
1641	5.04	8
1642	5.04	8
1643	5.04	9
1644	5.04	6
1645	5.04	7
1646	5.04	8
1647	5.04	7
1648	5.04	7
1649	5.04	8
1650	5.04	7
1651	5.04	8
1652	5.04	7
1653	5.04	8
1654	5.04	9
1655	5.04	6
1656	5.04	7
1657	5.04	8
1658	5.04	6
1659	5.04	5
1660	5.04	6
1661	5.04	9
1662	5.04	7
1663	5.04	9
1664	5.04	9
1665	5.04	8
1666	5.04	8
1667	5.04	6
1668	5.04	9
1669	5.04	7
1670	5.04	5
1671	5.04	6
1672	5.04	9
1673	5.04	9
1674	5.04	6
1675	5.04	9
1676	5.04	7
1677	5.04	8
1678	5.04	8
1679	5.04	8
1680	5.04	8
1681	5.04	8
1682	5.04	7
1683	5.04	9
1684	5.04	8
1685	5.04	8
1686	5.04	8
1687	5.04	8
1688	5.04	8
1689	5.04	7
1690	5.04	9
1691	5.04	9
1692	5.04	9
1693	5.04	6
1694	5.04	8
1695	5.04	8
1696	5.04	6
1697	5.04	8
1698	5.04	6
1699	5.04	7
1700	5.04	9
1701	5.04	9
1702	5.04	9
1703	5.04	7
1704	5.04	8
1705	5.04	8
1706	5.04	9
1707	5.04	8
1708	5.04	7
1709	5.04	7
1710	5.04	6
1711	5.04	9
1712	5.04	9
1713	5.04	8
1714	5.04	7
1715	5.04	8
1716	5.04	8
1717	5.04	8
1718	5.04	8
1719	5.04	9
1720	5.04	7
1721	5.04	5
1722	5.04	8
1723	5.04	8
1724	5.04	8
1725	5.04	7
1726	5.04	7
1727	5.04	7
1728	5.04	6
1729	5.04	7
1730	5.04	8
1731	5.04	5
1732	5.04	8
1733	5.04	9
1734	5.04	9
1735	5.04	7
1736	5.04	6
1737	5.04	8
1738	5.04	6
1739	5.04	8
1740	5.04	8
1741	5.04	8
1742	5.04	8
1743	5.04	9
1744	5.04	6
1745	5.04	7
1746	5.04	8
1747	5.04	7
1748	5.04	7
1749	5.04	8
1750	5.04	7
1751	5.04	8
1752	5.04	7
1753	5.04	8
1754	5.04	9
1755	5.04	6
1756	5.04	7
1757	5.04	8
1758	5.04	6
1759	5.04	5
1760	5.04	6
1761	5.04	9
1762	5.04	7
1763	5.04	9
1764	5.04	9
1765	5.04	8
1766	5.04	8
1767	5.04	6
1768	5.04	9
1769	5.04	7
1770	5.04	5
1771	5.04	6
1772	5.04	9
1773	5.04	9
1774	5.04	6
1775	5.04	9
1776	5.04	7
1777	5.04	8
1778	5.04	8
1779	5.04	8
1780	5.04	8
1781	5.04	8
1782	5.04	7
1783	5.04	9
1784	5.04	8
1785	5.04	8
1786	5.04	8
1787	5.04	8
1788	5.04	8
1789	5.04	7
1790	5.04	9
1791	5.04	9
1792	5.04	9
1793	5.04	6
1794	5.04	8
1795	5.04	8
1796	5.04	6
1797	5.04	8
1798	5.04	6
1799	5.04	7
1800	5.04	9
1801	5.04	9
1802	5.04	9
1803	5.04	7
1804	5.04	8
1805	5.04	8
1806	5.04	9
1807	5.04	8
1808	5.04	7
1809	5.04	7
1810	5.04	6
1811	5.04	9
1812	5.04	9
1813	5.04	8
1814	5.04	7
1815	5.04	8
1816	5.04	8
1817	5.04	8
1818	5.04	8
1819	5.04	9
1820	5.04	7
1821	5.04	5
1822	5.04	8
1823	5.04	8
1824	5.04	8
1825	5.04	7
1826	5.04	7
1827	5.04	7
1828	5.04	6
1829	5.04	7
1830	5.04	8
1831	5.04	5
1832	5.04	8
1833	5.04	9
1834	5.04	9
1835	5.04	7
1836	5.04	6
1837	5.04	8
1838	5.04	6
1839	5.04	8
1840	5.04	8
1841	5.04	8
1842	5.04	8
1843	5.04	9
1844	5.04	6
1845	5.04	7
1846	5.04	8
1847	5.04	7
1848	5.04	7
1849	5.04	8
1850	5.04	7
1851	5.04	8
1852	5.04	7
1853	5.04	8
1854	5.04	9
1855	5.04	6
1856	5.04	7
1857	5.04	8
1858	5.04	6
1859	5.04	5
1860	5.04	6
1861	5.04	9
1862	5.04	7
1863	5.04	9
1864	5.04	9
1865	5.04	8
1866	5.04	8
1867	5.04	6
1868	5.04	9
1869	5.04	7
1870	5.04	5
1871	5.04	6
1872	5.04	9
1873	5.04	9
1874	5.04	6
1875	5.04	9
1876	5.04	7
1877	5.04	8
1878	5.04	8
1879	5.04	8
1880	5.04	8
1881	5.04	8
1882	5.04	7
1883	5.04	9
1884	5.04	8
1885	5.04	8
1886	5.04	8
1887	5.04	8
1888	5.04	8
1889	5.04	7
1890	5.04	9
1891	5.04	9
1892	5.04	9
1893	5.04	6
1894	5.04	8
1895	5.04	8
1896	5.04	6
1897	5.04	8
1898	5.04	6
1899	5.04	7
1900	5.04	9
1901	5.04	9
1902	5.04	9
1903	5.04	7
1904	5.04	8
1905	5.04	8
1906	5.04	9
1907	5.04	8
1908	5.04	7
1909	5.04	7
1910	5.04	6
1911	5.04	9
1912	5.04	9
1913	5.04	8
1914	5.04	7
1915	5.04	8
1916	5.04	8
1917	5.04	8
1918	5.04	8
1919	5.04	9
1920	5.04	7
1921	5.04	5
1922	5.04	8
1923	5.04	8
1924	5.04	8
1925	5.04	7
1926	5.04	7
1927	5.04	7
1928	5.04	6
1929	5.04	7
1930	5.04	8
1931	5.04	5
1932	5.04	8
1933	5.04	9
1934	5.04	9
1935	5.04	7
1936	5.04	6
1937	5.04	8
1938	5.04	6
1939	5.04	8
1940	5.04	8
1941	5.04	8
1942	5.04	8
1943	5.04	9
1944	5.04	6
1945	5.04	7
1946	5.04	8
1947	5.04	7
1948	5.04	7
1949	5.04	8
1950	5.04	7
1951	5.04	8
1952	5.04	7
1953	5.04	8
1954	5.04	9
1955	5.04	6
1956	5.04	7
1957	5.04	8
1958	5.04	6
1959	5.04	5
1960	5.04	6
1961	5.04	9
1962	5.04	7
1963	5.04	9
1964	5.04	9
1965	5.04	8
1966	5.04	8
1967	5.04	6
1968	5.04	9
1969	5.04	7
1970	5.04	5
1971	5.04	6
1972	5.04	9
1973	5.04	9
1974	5.04	6
1975	5.04	9
1976	5.04	7
1977	5.04	8
1978	5.04	8
1979	5.04	8
1980	5.04	8
1981	5.04	8
1982	5.04	7
1983	5.04	9
1984	5.04	8
1985	5.04	8
1986	5.04	8
1987	5.04	8
1988	5.04	8
1989	5.04	7
1990	5.04	9
1991	5.04	9
1992	5.04	9
1993	5.04	6
1994	5.04	8
1995	5.04	8
1996	5.04	6
1997	5.04	8
1998	5.04	6
[truncated: 98,001 more rows]
