# Supplementary material
Source: ML conference proceedings conference paper supplement (https://proceedings.neurips.cc/paper_files/paper/2022/hash/9d3faa41886997cfc2128b930077fa49-Abstract.html)
Supplement: Supplementary file 1 [file 9d3faa41886997cfc2128b930077fa49-Supplemental-Conference.zip › code/src/data_inhomogeneous/allindicators.json]

[[false, false, false, false, false, false, false, false, false, false, false, false, false, false, false, false, false, false, false, false, false, false, false, false, false, false, false, false, false, false, false, false, false, false, false, false, false, false, false, false, false, true, true, false, false, false, false, false, false, false, false, true, false, false, false, false, false, false, false, true, false, false, true, true, true, false, false, false, true, true, false, true, false, false, false, true, false, false, false, true, false, false, false, true, false, false, false, false, false, false, false, true, false, false, false, false, false, false, false, false, false, false, false, false, false, false, false, false, false, false, false, false, false, false, false, false, false, false, true, false, false, true, false, true, true, false, false, false, false, false, false, false, false, false, false, false, false, false, false, false, false, false, false, false, false, false, false, false, false, false, false, false, true, false, false, false, false, false, true, false, false, true, false, false, false, false, false, false, false, true, false, false, true, false, false, false, true, false, false, false, true, false, false, true, false, false, true, false, false, false, true, false, false, false, true, true, false, false, false, true, false, false, false, true, false, false, false, true, false, false, false, false, false, false, false, false, false, false, false, false, false, false, false, false, false, false, false, false, true, false, true, true, false, false, false, true, true, false, false, false, false, true, false, false, false, false, false, false, false, false, false, false, true, false, true, true, false, true, false, false, true, false, false, false, false, false, false, true, false, true, false, false, false, false, false, false, false, true, true, true, false, false, false, true, true, false, false, true, true, false, true, false, false, true, false, false, false, false, false, false, false, false, false, false, true, false, true, false, true, false, false, false, false, false, false, false, false, true, false, false, true, false, false, true, false, true, false, false, false, false, false, false, false, false, false, true, true, false, true, false, false, false, false, true, true, true, false, false, false, false, false, true, false, true, true, false, false, false, true, true, false, false, true, false, false, false, false, false, true, false, true, true, false, true, false, false, false, false, false, false, false, true, false, true, false, false, true, false, true, false, true, false, true, false, false, false, false, false, false, true, false, false, false, true, false, true, false, false, false, false, true, false, true, false, false, false, false, false, false, false, false, false, false, false, true, false, true, false, false, false, false, false, true, false, true, false, false, false, false, true, false, false, false, false, false, false, false, true, false, false, false, false, false, false, true, false, false, true, false, false, true, false, false, false, false, false, false, false, false, false, false, false, false, false, false, false, true, false, false, false, false, false, false, false, false, false, false, false, true, false, false, false, false, false, false, false, false, false, false, false, false, false, false, false, false, false, false, false, false, false, false, false, false, false, false, false, false, false, false, false, false, false, false, false, false, false], [false, false, false, false, false, false, false, false, false, false, false, false, false, false, false, false, false, false, false, false, false, false, false, false, false, false, false, false, false, false, false, false, false, false, false, false, false, false, false, false, false, true, true, false, false, false, false, false, false, false, false, true, false, false, false, false, false, false, false, true, false, false, true, true, true, false, false, false, true, true, false, true, false, false, false, true, false, false, false, true, false, false, false, true, false, false, false, false, false, false, false, true, false, false, false, false, false, false, false, false, false, false, false, false, false, false, false, false, false, false, false, false, false, false, false, false, false, false, true, false, false, true, false, true, true, false, false, false, false, false, false, false, false, false, false, false, false, false, false, false, false, false, false, false, false, false, false, false, false, false, false, false, true, false, false, false, false, false, true, false, false, true, false, false, false, false, false, false, false, true, false, false, true, false, false, false, true, false, false, false, true, false, false, true, false, false, true, false, false, false, true, false, false, false, true, true, false, false, false, true, false, false, false, true, false, false, false, true, false, false, false, false, false, false, false, false, false, false, false, false, false, false, false, false, false, false, false, false, true, false, true, true, false, false, false, true, true, false, false, false, false, true, false, false, false, false, false, false, false, false, false, false, true, false, true, true, false, true, false, false, true, false, false, false, false, false, false, true, false, true, false, false, false, false, false, false, false, true, true, true, false, false, false, true, true, false, false, true, true, false, true, false, false, true, false, false, false, false, false, false, false, false, false, false, true, false, true, false, true, false, false, false, false, false, false, false, false, true, false, false, true, false, false, true, false, true, false, false, false, false, false, false, false, false, false, true, true, false, true, false, false, false, false, true, true, true, false, false, false, false, false, true, false, true, true, false, false, false, true, true, false, false, true, false, false, false, false, false, true, false, true, true, false, true, false, false, false, false, false, false, false, true, false, true, false, false, true, false, true, false, true, false, true, false, false, false, false, false, false, true, false, false, false, true, false, true, false, false, false, false, true, false, true, false, false, false, false, false, false, false, false, false, false, false, true, false, true, false, false, false, false, false, true, false, true, false, false, false, false, true, false, false, false, false, false, false, false, true, false, false, false, false, false, false, true, false, false, true, false, false, true, false, false, false, false, false, false, false, false, false, false, false, false, false, false, false, true, false, false, false, false, false, false, false, false, false, false, false, true, false, false, false, false, false, false, false, false, false, false, false, false, false, false, false, false, false, false, false, false, false, false, false, false, false, false, false, false, false, false, false, false, false, false, false, false, false], [false, false, false, false, false, false, false, false, false, false, false, false, false, false, false, false, false, false, false, false, false, false, false, false, false, false, false, false, false, false, false, false, false, false, false, false, false, false, false, false, false, true, true, false, false, false, false, false, false, false, false, true, false, false, false, false, false, false, false, true, false, false, true, true, true, false, false, false, true, true, false, true, false, false, false, true, false, false, false, true, false, false, false, true, false, false, false, false, false, false, false, true, false, false, false, false, false, false, false, false, false, false, false, false, false, false, false, false, false, false, false, false, false, false, false, false, false, false, true, false, false, true, false, true, true, false, false, false, false, false, false, false, false, false, false, false, false, false, false, false, false, false, false, false, false, false, false, false, false, false, false, false, true, false, false, false, false, false, true, false, false, true, false, false, false, false, false, false, false, true, false, false, true, false, false, false, true, false, false, false, true, false, false, true, false, false, true, false, false, false, true, false, false, false, true, true, false, false, false, true, false, false, false, true, false, false, false, true, false, false, false, false, false, false, false, false, false, false, false, false, false, false, false, false, false, false, false, false, true, false, true, true, false, false, false, true, true, false, false, false, false, true, false, false, false, false, false, false, false, false, false, false, true, false, true, true, false, true, false, false, true, false, false, false, false, false, false, true, false, true, false, false, false, false, false, false, false, true, true, true, false, false, false, true, true, false, false, true, true, false, true, false, false, true, false, false, false, false, false, false, false, false, false, false, true, false, true, false, true, false, false, false, false, false, false, false, false, true, false, false, true, false, false, true, false, true, false, false, false, false, false, false, false, false, false, true, true, false, true, false, false, false, false, true, true, true, false, false, false, false, false, true, false, true, true, false, false, false, true, true, false, false, true, false, false, false, false, false, true, false, true, true, false, true, false, false, false, false, false, false, false, true, false, true, false, false, true, false, true, false, true, false, true, false, false, false, false, false, false, true, false, false, false, true, false, true, false, false, false, false, true, false, true, false, false, false, false, false, false, false, false, false, false, false, true, false, true, false, false, false, false, false, true, false, true, false, false, false, false, true, false, false, false, false, false, false, false, true, false, false, false, false, false, false, true, false, false, true, false, false, true, false, false, false, false, false, false, false, false, false, false, false, false, false, false, false, true, false, false, false, false, false, false, false, false, false, false, false, true, false, false, false, false, false, false, false, false, false, false, false, false, false, false, false, false, false, false, false, false, false, false, false, false, false, false, false, false, false, false, false, false, false, false, false, false, false], [false, false, false, false, false, false, false, false, false, false, false, false, false, false, false, false, false, false, false, false, false, false, false, false, false, false, false, false, false, false, false, false, false, false, false, false, false, false, false, false, false, true, true, false, false, false, false, false, false, false, false, true, false, false, false, false, false, false, false, true, false, false, true, true, true, false, false, false, true, true, false, true, false, false, false, true, false, false, false, true, false, false, false, true, false, false, false, false, false, false, false, true, false, false, false, false, false, false, false, false, false, false, false, false, false, false, false, false, false, false, false, false, false, false, false, false, false, false, true, false, false, true, false, true, true, false, false, false, false, false, false, false, false, false, false, false, false, false, false, false, false, false, false, false, false, false, false, false, false, false, false, false, true, false, false, false, false, false, true, false, false, true, false, false, false, false, false, false, false, true, false, false, true, false, false, false, true, false, false, false, true, false, false, true, false, false, true, false, false, false, true, false, false, false, true, true, false, false, false, true, false, false, false, true, false, false, false, true, false, false, false, false, false, false, false, false, false, false, false, false, false, false, false, false, false, false, false, false, true, false, true, true, false, false, false, true, true, false, false, false, false, true, false, false, false, false, false, false, false, false, false, false, true, false, true, true, false, true, false, false, true, false, false, false, false, false, false, true, false, true, false, false, false, false, false, false, false, true, true, true, false, false, false, true, true, false, false, true, true, false, true, false, false, true, false, false, false, false, false, false, false, false, false, false, true, false, true, false, true, false, false, false, false, false, false, false, false, true, false, false, true, false, false, true, false, true, false, false, false, false, false, false, false, false, false, true, true, false, true, false, false, false, false, true, true, true, false, false, false, false, false, true, false, true, true, false, false, false, true, true, false, false, true, false, false, false, false, false, true, false, true, true, false, true, false, false, false, false, false, false, false, true, false, true, false, false, true, false, true, false, true, false, true, false, false, false, false, false, false, true, false, false, false, true, false, true, false, false, false, false, true, false, true, false, false, false, false, false, false, false, false, false, false, false, true, false, true, false, false, false, false, false, true, false, true, false, false, false, false, true, false, false, false, false, false, false, false, true, false, false, false, false, false, false, true, false, false, true, false, false, true, false, false, false, false, false, false, false, false, false, false, false, false, false, false, false, true, false, false, false, false, false, false, false, false, false, false, false, true, false, false, false, false, false, false, false, false, false, false, false, false, false, false, false, false, false, false, false, false, false, false, false, false, false, false, false, false, false, false, false, false, false, false, false, false, false], [false, false, false, false, false, false, false, false, false, false, false, false, false, false, false, false, false, false, false, false, false, false, false, false, false, false, false, false, false, false, false, false, false, false, false, false, false, false, false, false, false, true, true, false, false, false, false, false, false, false, false, true, false, false, false, false, false, false, false, true, false, false, true, true, true, false, false, false, true, true, false, true, false, false, false, true, false, false, false, true, false, false, false, true, false, false, false, false, false, false, false, true, false, false, false, false, false, false, false, false, false, false, false, false, false, false, false, false, false, false, false, false, false, false, false, false, false, false, true, false, false, true, false, true, true, false, false, false, false, false, false, false, false, false, false, false, false, false, false, false, false, false, false, false, false, false, false, false, false, false, false, false, true, false, false, false, false, false, true, false, false, true, false, false, false, false, false, false, false, true, false, false, true, false, false, false, true, false, false, false, true, false, false, true, false, false, true, false, false, false, true, false, false, false, true, true, false, false, false, true, false, false, false, true, false, false, false, true, false, false, false, false, false, false, false, false, false, false, false, false, false, false, false, false, false, false, false, false, true, false, true, true, false, false, false, true, true, false, false, false, false, true, false, false, false, false, false, false, false, false, false, false, true, false, true, true, false, true, false, false, true, false, false, false, false, false, false, true, false, true, false, false, false, false, false, false, false, true, true, true, false, false, false, true, true, false, false, true, true, false, true, false, false, true, false, false, false, false, false, false, false, false, false, false, true, false, true, false, true, false, false, false, false, false, false, false, false, true, false, false, true, false, false, true, false, true, false, false, false, false, false, false, false, false, false, true, true, false, true, false, false, false, false, true, true, true, false, false, false, false, false, true, false, true, true, false, false, false, true, true, false, false, true, false, false, false, false, false, true, false, true, true, false, true, false, false, false, false, false, false, false, true, false, true, false, false, true, false, true, false, true, false, true, false, false, false, false, false, false, true, false, false, false, true, false, true, false, false, false, false, true, false, true, false, false, false, false, false, false, false, false, false, false, false, true, false, true, false, false, false, false, false, true, false, true, false, false, false, false, true, false, false, false, false, false, false, false, true, false, false, false, false, false, false, true, false, false, true, false, false, true, false, false, false, false, false, false, false, false, false, false, false, false, false, false, false, true, false, false, false, false, false, false, false, false, false, false, false, true, false, false, false, false, false, false, false, false, false, false, false, false, false, false, false, false, false, false, false, false, false, false, false, false, false, false, false, false, false, false, false, false, false, false, false, false, false], [false, false, false, false, false, false, false, false, false, false, false, false, false, false, false, false, false, false, false, false, false, false, false, false, false, false, false, false, false, false, false, false, false, false, false, false, false, false, false, false, false, true, true, false, false, false, false, false, false, false, false, true, false, false, false, false, false, false, false, true, false, false, true, true, true, false, false, false, true, true, false, true, false, false, false, true, false, false, false, true, false, false, false, true, false, false, false, false, false, false, false, true, false, false, false, false, false, false, false, false, false, false, false, false, false, false, false, false, false, false, false, false, false, false, false, false, false, false, true, false, false, true, false, true, true, false, false, false, false, false, false, false, false, false, false, false, false, false, false, false, false, false, false, false, false, false, false, false, false, false, false, false, true, false, false, false, false, false, true, false, false, true, false, false, false, false, false, false, false, true, false, false, true, false, false, false, true, false, false, false, true, false, false, true, false, false, true, false, false, false, true, false, false, false, true, true, false, false, false, true, false, false, false, true, false, false, false, true, false, false, false, false, false, false, false, false, false, false, false, false, false, false, false, false, false, false, false, false, true, false, true, true, false, false, false, true, true, false, false, false, false, true, false, false, false, false, false, false, false, false, false, false, true, false, true, true, false, true, false, false, true, false, false, false, false, false, false, true, false, true, false, false, false, false, false, false, false, true, true, true, false, false, false, true, true, false, false, true, true, false, true, false, false, true, false, false, false, false, false, false, false, false, false, false, true, false, true, false, true, false, false, false, false, false, false, false, false, true, false, false, true, false, false, true, false, true, false, false, false, false, false, false, false, false, false, true, true, false, true, false, false, false, false, true, true, true, false, false, false, false, false, true, false, true, true, false, false, false, true, true, false, false, true, false, false, false, false, false, true, false, true, true, false, true, false, false, false, false, false, false, false, true, false, true, false, false, true, false, true, false, true, false, true, false, false, false, false, false, false, true, false, false, false, true, false, true, false, false, false, false, true, false, true, false, false, false, false, false, false, false, false, false, false, false, true, false, true, false, false, false, false, false, true, false, true, false, false, false, false, true, false, false, false, false, false, false, false, true, false, false, false, false, false, false, true, false, false, true, false, false, true, false, false, false, false, false, false, false, false, false, false, false, false, false, false, false, true, false, false, false, false, false, false, false, false, false, false, false, true, false, false, false, false, false, false, false, false, false, false, false, false, false, false, false, false, false, false, false, false, false, false, false, false, false, false, false, false, false, false, false, false, false, false, false, false, false], [false, false, false, false, false, false, false, false, false, false, false, false, false, false, false, false, false, false, false, false, false, false, false, false, false, false, false, false, false, false, false, false, false, false, false, false, false, false, false, false, false, true, true, false, false, false, false, false, false, false, false, true, false, false, false, false, false, false, false, true, false, false, true, true, true, false, false, false, true, true, false, true, false, false, false, true, false, false, false, true, false, false, false, true, false, false, false, false, false, false, false, true, false, false, false, false, false, false, false, false, false, false, false, false, false, false, false, false, false, false, false, false, false, false, false, false, false, false, true, false, false, true, false, true, true, false, false, false, false, false, false, false, false, false, false, false, false, false, false, false, false, false, false, false, false, false, false, false, false, false, false, false, true, false, false, false, false, false, true, false, false, true, false, false, false, false, false, false, false, true, false, false, true, false, false, false, true, false, false, false, true, false, false, true, false, false, true, false, false, false, true, false, false, false, true, true, false, false, false, true, false, false, false, true, false, false, false, true, false, false, false, false, false, false, false, false, false, false, false, false, false, false, false, false, false, false, false, false, true, false, true, true, false, false, false, true, true, false, false, false, false, true, false, false, false, false, false, false, false, false, false, false, true, false, true, true, false, true, false, false, true, false, false, false, false, false, false, true, false, true, false, false, false, false, false, false, false, true, true, true, false, false, false, true, true, false, false, true, true, false, true, false, false, true, false, false, false, false, false, false, false, false, false, false, true, false, true, false, true, false, false, false, false, false, false, false, false, true, false, false, true, false, false, true, false, true, false, false, false, false, false, false, false, false, false, true, true, false, true, false, false, false, false, true, true, true, false, false, false, false, false, true, false, true, true, false, false, false, true, true, false, false, true, false, false, false, false, false, true, false, true, true, false, true, false, false, false, false, false, false, false, true, false, true, false, false, true, false, true, false, true, false, true, false, false, false, false, false, false, true, false, false, false, true, false, true, false, false, false, false, true, false, true, false, false, false, false, false, false, false, false, false, false, false, true, false, true, false, false, false, false, false, true, false, true, false, false, false, false, true, false, false, false, false, false, false, false, true, false, false, false, false, false, false, true, false, false, true, false, false, true, false, false, false, false, false, false, false, false, false, false, false, false, false, false, false, true, false, false, false, false, false, false, false, false, false, false, false, true, false, false, false, false, false, false, false, false, false, false, false, false, false, false, false, false, false, false, false, false, false, false, false, false, false, false, false, false, false, false, false, false, false, false, false, false, false], [false, false, false, false, false, false, false, false, false, false, false, false, false, false, false, false, false, false, false, false, false, false, false, false, false, false, false, false, false, false, false, false, false, false, false, false, false, false, false, false, false, true, true, false, false, false, false, false, false, false, false, true, false, false, false, false, false, false, false, true, false, false, true, true, true, false, false, false, true, true, false, true, false, false, false, true, false, false, false, true, false, false, false, true, false, false, false, false, false, false, false, true, false, false, false, false, false, false, false, false, false, false, false, false, false, false, false, false, false, false, false, false, false, false, false, false, false, false, true, false, false, true, false, true, true, false, false, false, false, false, false, false, false, false, false, false, false, false, false, false, false, false, false, false, false, false, false, false, false, false, false, false, true, false, false, false, false, false, true, false, false, true, false, false, false, false, false, false, false, true, false, false, true, false, false, false, true, false, false, false, true, false, false, true, false, false, true, false, false, false, true, false, false, false, true, true, false, false, false, true, false, false, false, true, false, false, false, true, false, false, false, false, false, false, false, false, false, false, false, false, false, false, false, false, false, false, false, false, true, false, true, true, false, false, false, true, true, false, false, false, false, true, false, false, false, false, false, false, false, false, false, false, true, false, true, true, false, true, false, false, true, false, false, false, false, false, false, true, false, true, false, false, false, false, false, false, false, true, true, true, false, false, false, true, true, false, false, true, true, false, true, false, false, true, false, false, false, false, false, false, false, false, false, false, true, false, true, false, true, false, false, false, false, false, false, false, false, true, false, false, true, false, false, true, false, true, false, false, false, false, false, false, false, false, false, true, true, false, true, false, false, false, false, true, true, true, false, false, false, false, false, true, false, true, true, false, false, false, true, true, false, false, true, false, false, false, false, false, true, false, true, true, false, true, false, false, false, false, false, false, false, true, false, true, false, false, true, false, true, false, true, false, true, false, false, false, false, false, false, true, false, false, false, true, false, true, false, false, false, false, true, false, true, false, false, false, false, false, false, false, false, false, false, false, true, false, true, false, false, false, false, false, true, false, true, false, false, false, false, true, false, false, false, false, false, false, false, true, false, false, false, false, false, false, true, false, false, true, false, false, true, false, false, false, false, false, false, false, false, false, false, false, false, false, false, false, true, false, false, false, false, false, false, false, false, false, false, false, true, false, false, false, false, false, false, false, false, false, false, false, false, false, false, false, false, false, false, false, false, false, false, false, false, false, false, false, false, false, false, false, false, false, false, false, false, false], [false, false, false, false, false, false, false, false, false, false, false, false, false, false, false, false, false, false, false, false, false, false, false, false, false, false, false, false, false, false, false, false, false, false, false, false, false, false, false, false, false, true, true, false, false, false, false, false, false, false, false, true, false, false, false, false, false, false, false, true, false, false, true, true, true, false, false, false, true, true, false, true, false, false, false, true, false, false, false, true, false, false, false, true, false, false, false, false, false, false, false, true, false, false, false, false, false, false, false, false, false, false, false, false, false, false, false, false, false, false, false, false, false, false, false, false, false, false, true, false, false, true, false, true, true, false, false, false, false, false, false, false, false, false, false, false, false, false, false, false, false, false, false, false, false, false, false, false, false, false, false, false, true, false, false, false, false, false, true, false, false, true, false, false, false, false, false, false, false, true, false, false, true, false, false, false, true, false, false, false, true, false, false, true, false, false, true, false, false, false, true, false, false, false, true, true, false, false, false, true, false, false, false, true, false, false, false, true, false, false, false, false, false, false, false, false, false, false, false, false, false, false, false, false, false, false, false, false, true, false, true, true, false, false, false, true, true, false, false, false, false, true, false, false, false, false, false, false, false, false, false, false, true, false, true, true, false, true, false, false, true, false, false, false, false, false, false, true, false, true, false, false, false, false, false, false, false, true, true, true, false, false, false, true, true, false, false, true, true, false, true, false, false, true, false, false, false, false, false, false, false, false, false, false, true, false, true, false, true, false, false, false, false, false, false, false, false, true, false, false, true, false, false, true, false, true, false, false, false, false, false, false, false, false, false, true, true, false, true, false, false, false, false, true, true, true, false, false, false, false, false, true, false, true, true, false, false, false, true, true, false, false, true, false, false, false, false, false, true, false, true, true, false, true, false, false, false, false, false, false, false, true, false, true, false, false, true, false, true, false, true, false, true, false, false, false, false, false, false, true, false, false, false, true, false, true, false, false, false, false, true, false, true, false, false, false, false, false, false, false, false, false, false, false, true, false, true, false, false, false, false, false, true, false, true, false, false, false, false, true, false, false, false, false, false, false, false, true, false, false, false, false, false, false, true, false, false, true, false, false, true, false, false, false, false, false, false, false, false, false, false, false, false, false, false, false, true, false, false, false, false, false, false, false, false, false, false, false, true, false, false, false, false, false, false, false, false, false, false, false, false, false, false, false, false, false, false, false, false, false, false, false, false, false, false, false, false, false, false, false, false, false, false, false, false, false], [false, false, false, false, false, false, false, false, false, false, false, false, false, false, false, false, false, false, false, false, false, false, false, false, false, false, false, false, false, false, false, false, false, false, false, false, false, false, false, false, false, true, true, false, false, false, false, false, false, false, false, true, false, false, false, false, false, false, false, true, false, false, true, true, true, false, false, false, true, true, false, true, false, false, false, true, false, false, false, true, false, false, false, true, false, false, false, false, false, false, false, true, false, false, false, false, false, false, false, false, false, false, false, false, false, false, false, false, false, false, false, false, false, false, false, false, false, false, true, false, false, true, false, true, true, false, false, false, false, false, false, false, false, false, false, false, false, false, false, false, false, false, false, false, false, false, false, false, false, false, false, false, true, false, false, false, false, false, true, false, false, true, false, false, false, false, false, false, false, true, false, false, true, false, false, false, true, false, false, false, true, false, false, true, false, false, true, false, false, false, true, false, false, false, true, true, false, false, false, true, false, false, false, true, false, false, false, true, false, false, false, false, false, false, false, false, false, false, false, false, false, false, false, false, false, false, false, false, true, false, true, true, false, false, false, true, true, false, false, false, false, true, false, false, false, false, false, false, false, false, false, false, true, false, true, true, false, true, false, false, true, false, false, false, false, false, false, true, false, true, false, false, false, false, false, false, false, true, true, true, false, false, false, true, true, false, false, true, true, false, true, false, false, true, false, false, false, false, false, false, false, false, false, false, true, false, true, false, true, false, false, false, false, false, false, false, false, true, false, false, true, false, false, true, false, true, false, false, false, false, false, false, false, false, false, true, true, false, true, false, false, false, false, true, true, true, false, false, false, false, false, true, false, true, true, false, false, false, true, true, false, false, true, false, false, false, false, false, true, false, true, true, false, true, false, false, false, false, false, false, false, true, false, true, false, false, true, false, true, false, true, false, true, false, false, false, false, false, false, true, false, false, false, true, false, true, false, false, false, false, true, false, true, false, false, false, false, false, false, false, false, false, false, false, true, false, true, false, false, false, false, false, true, false, true, false, false, false, false, true, false, false, false, false, false, false, false, true, false, false, false, false, false, false, true, false, false, true, false, false, true, false, false, false, false, false, false, false, false, false, false, false, false, false, false, false, true, false, false, false, false, false, false, false, false, false, false, false, true, false, false, false, false, false, false, false, false, false, false, false, false, false, false, false, false, false, false, false, false, false, false, false, false, false, false, false, false, false, false, false, false, false, false, false, false, false], [false, false, false, false, false, false, false, false, false, false, false, false, false, false, false, false, false, false, false, false, false, false, false, false, false, false, false, false, false, false, false, false, false, false, false, false, false, false, false, false, false, true, true, false, false, false, false, false, false, false, false, true, false, false, false, false, false, false, false, true, false, false, true, true, true, false, false, false, true, true, false, true, false, false, false, true, false, false, false, true, false, false, false, true, false, false, false, false, false, false, false, true, false, false, false, false, false, false, false, false, false, false, false, false, false, false, false, false, false, false, false, false, false, false, false, false, false, false, true, false, false, true, false, true, true, false, false, false, false, false, false, false, false, false, false, false, false, false, false, false, false, false, false, false, false, false, false, false, false, false, false, false, true, false, false, false, false, false, true, false, false, true, false, false, false, false, false, false, false, true, false, false, true, false, false, false, true, false, false, false, true, false, false, true, false, false, true, false, false, false, true, false, false, false, true, true, false, false, false, true, false, false, false, true, false, false, false, true, false, false, false, false, false, false, false, false, false, false, false, false, false, false, false, false, false, false, false, false, true, false, true, true, false, false, false, true, true, false, false, false, false, true, false, false, false, false, false, false, false, false, false, false, true, false, true, true, false, true, false, false, true, false, false, false, false, false, false, true, false, true, false, false, false, false, false, false, false, true, true, true, false, false, false, true, true, false, false, true, true, false, true, false, false, true, false, false, false, false, false, false, false, false, false, false, true, false, true, false, true, false, false, false, false, false, false, false, false, true, false, false, true, false, false, true, false, true, false, false, false, false, false, false, false, false, false, true, true, false, true, false, false, false, false, true, true, true, false, false, false, false, false, true, false, true, true, false, false, false, true, true, false, false, true, false, false, false, false, false, true, false, true, true, false, true, false, false, false, false, false, false, false, true, false, true, false, false, true, false, true, false, true, false, true, false, false, false, false, false, false, true, false, false, false, true, false, true, false, false, false, false, true, false, true, false, false, false, false, false, false, false, false, false, false, false, true, false, true, false, false, false, false, false, true, false, true, false, false, false, false, true, false, false, false, false, false, false, false, true, false, false, false, false, false, false, true, false, false, true, false, false, true, false, false, false, false, false, false, false, false, false, false, false, false, false, false, false, true, false, false, false, false, false, false, false, false, false, false, false, true, false, false, false, false, false, false, false, false, false, false, false, false, false, false, false, false, false, false, false, false, false, false, false, false, false, false, false, false, false, false, false, false, false, false, false, false, false], [false, false, false, false, false, false, false, false, false, false, false, false, false, false, false, false, false, false, false, false, false, false, false, false, false, false, false, false, false, false, false, false, false, false, false, false, false, false, false, false, false, true, true, false, false, false, false, false, false, false, false, true, false, false, false, false, false, false, false, true, false, false, true, true, true, false, false, false, true, true, false, true, false, false, false, true, false, false, false, true, false, false, false, true, false, false, false, false, false, false, false, true, false, false, false, false, false, false, false, false, false, false, false, false, false, false, false, false, false, false, false, false, false, false, false, false, false, false, true, false, false, true, false, true, true, false, false, false, false, false, false, false, false, false, false, false, false, false, false, false, false, false, false, false, false, false, false, false, false, false, false, false, true, false, false, false, false, false, true, false, false, true, false, false, false, false, false, false, false, true, false, false, true, false, false, false, true, false, false, false, true, false, false, true, false, false, true, false, false, false, true, false, false, false, true, true, false, false, false, true, false, false, false, true, false, false, false, true, false, false, false, false, false, false, false, false, false, false, false, false, false, false, false, false, false, false, false, false, true, false, true, true, false, false, false, true, true, false, false, false, false, true, false, false, false, false, false, false, false, false, false, false, true, false, true, true, false, true, false, false, true, false, false, false, false, false, false, true, false, true, false, false, false, false, false, false, false, true, true, true, false, false, false, true, true, false, false, true, true, false, true, false, false, true, false, false, false, false, false, false, false, false, false, false, true, false, true, false, true, false, false, false, false, false, false, false, false, true, false, false, true, false, false, true, false, true, false, false, false, false, false, false, false, false, false, true, true, false, true, false, false, false, false, true, true, true, false, false, false, false, false, true, false, true, true, false, false, false, true, true, false, false, true, false, false, false, false, false, true, false, true, true, false, true, false, false, false, false, false, false, false, true, false, true, false, false, true, false, true, false, true, false, true, false, false, false, false, false, false, true, false, false, false, true, false, true, false, false, false, false, true, false, true, false, false, false, false, false, false, false, false, false, false, false, true, false, true, false, false, false, false, false, true, false, true, false, false, false, false, true, false, false, false, false, false, false, false, true, false, false, false, false, false, false, true, false, false, true, false, false, true, false, false, false, false, false, false, false, false, false, false, false, false, false, false, false, true, false, false, false, false, false, false, false, false, false, false, false, true, false, false, false, false, false, false, false, false, false, false, false, false, false, false, false, false, false, false, false, false, false, false, false, false, false, false, false, false, false, false, false, false, false, false, false, false, false], [false, false, false, false, false, false, false, false, false, false, false, false, false, false, false, false, false, false, false, false, false, false, false, false, false, false, false, false, false, false, false, false, false, false, false, false, false, false, false, false, false, true, true, false, false, false, false, false, false, false, false, true, false, false, false, false, false, false, false, true, false, false, true, true, true, false, false, false, true, true, false, true, false, false, false, true, false, false, false, true, false, false, false, true, false, false, false, false, false, false, false, true, false, false, false, false, false, false, false, false, false, false, false, false, false, false, false, false, false, false, false, false, false, false, false, false, false, false, true, false, false, true, false, true, true, false, false, false, false, false, false, false, false, false, false, false, false, false, false, false, false, false, false, false, false, false, false, false, false, false, false, false, true, false, false, false, false, false, true, false, false, true, false, false, false, false, false, false, false, true, false, false, true, false, false, false, true, false, false, false, true, false, false, true, false, false, true, false, false, false, true, false, false, false, true, true, false, false, false, true, false, false, false, true, false, false, false, true, false, false, false, false, false, false, false, false, false, false, false, false, false, false, false, false, false, false, false, false, true, false, true, true, false, false, false, true, true, false, false, false, false, true, false, false, false, false, false, false, false, false, false, false, true, false, true, true, false, true, false, false, true, false, false, false, false, false, false, true, false, true, false, false, false, false, false, false, false, true, true, true, false, false, false, true, true, false, false, true, true, false, true, false, false, true, false, false, false, false, false, false, false, false, false, false, true, false, true, false, true, false, false, false, false, false, false, false, false, true, false, false, true, false, false, true, false, true, false, false, false, false, false, false, false, false, false, true, true, false, true, false, false, false, false, true, true, true, false, false, false, false, false, true, false, true, true, false, false, false, true, true, false, false, true, false, false, false, false, false, true, false, true, true, false, true, false, false, false, false, false, false, false, true, false, true, false, false, true, false, true, false, true, false, true, false, false, false, false, false, false, true, false, false, false, true, false, true, false, false, false, false, true, false, true, false, false, false, false, false, false, false, false, false, false, false, true, false, true, false, false, false, false, false, true, false, true, false, false, false, false, true, false, false, false, false, false, false, false, true, false, false, false, false, false, false, true, false, false, true, false, false, true, false, false, false, false, false, false, false, false, false, false, false, false, false, false, false, true, false, false, false, false, false, false, false, false, false, false, false, true, false, false, false, false, false, false, false, false, false, false, false, false, false, false, false, false, false, false, false, false, false, false, false, false, false, false, false, false, false, false, false, false, false, false, false, false, false], [false, false, false, false, false, false, false, false, false, false, false, false, false, false, false, false, false, false, false, false, false, false, false, false, false, false, false, false, false, false, false, false, false, false, false, false, false, false, false, false, false, true, true, false, false, false, false, false, false, false, false, true, false, false, false, false, false, false, false, true, false, false, true, true, true, false, false, false, true, true, false, true, false, false, false, true, false, false, false, true, false, false, false, true, false, false, false, false, false, false, false, true, false, false, false, false, false, false, false, false, false, false, false, false, false, false, false, false, false, false, false, false, false, false, false, false, false, false, true, false, false, true, false, true, true, false, false, false, false, false, false, false, false, false, false, false, false, false, false, false, false, false, false, false, false, false, false, false, false, false, false, false, true, false, false, false, false, false, true, false, false, true, false, false, false, false, false, false, false, true, false, false, true, false, false, false, true, false, false, false, true, false, false, true, false, false, true, false, false, false, true, false, false, false, true, true, false, false, false, true, false, false, false, true, false, false, false, true, false, false, false, false, false, false, false, false, false, false, false, false, false, false, false, false, false, false, false, false, true, false, true, true, false, false, false, true, true, false, false, false, false, true, false, false, false, false, false, false, false, false, false, false, true, false, true, true, false, true, false, false, true, false, false, false, false, false, false, true, false, true, false, false, false, false, false, false, false, true, true, true, false, false, false, true, true, false, false, true, true, false, true, false, false, true, false, false, false, false, false, false, false, false, false, false, true, false, true, false, true, false, false, false, false, false, false, false, false, true, false, false, true, false, false, true, false, true, false, false, false, false, false, false, false, false, false, true, true, false, true, false, false, false, false, true, true, true, false, false, false, false, false, true, false, true, true, false, false, false, true, true, false, false, true, false, false, false, false, false, true, false, true, true, false, true, false, false, false, false, false, false, false, true, false, true, false, false, true, false, true, false, true, false, true, false, false, false, false, false, false, true, false, false, false, true, false, true, false, false, false, false, true, false, true, false, false, false, false, false, false, false, false, false, false, false, true, false, true, false, false, false, false, false, true, false, true, false, false, false, false, true, false, false, false, false, false, false, false, true, false, false, false, false, false, false, true, false, false, true, false, false, true, false, false, false, false, false, false, false, false, false, false, false, false, false, false, false, true, false, false, false, false, false, false, false, false, false, false, false, true, false, false, false, false, false, false, false, false, false, false, false, false, false, false, false, false, false, false, false, false, false, false, false, false, false, false, false, false, false, false, false, false, false, false, false, false, false], [false, false, false, false, false, false, false, false, false, false, false, false, false, false, false, false, false, false, false, false, false, false, false, false, false, false, false, false, false, false, false, false, false, false, false, false, false, false, false, false, false, true, true, false, false, false, false, false, false, false, false, true, false, false, false, false, false, false, false, true, false, false, true, true, true, false, false, false, true, true, false, true, false, false, false, true, false, false, false, true, false, false, false, true, false, false, false, false, false, false, false, true, false, false, false, false, false, false, false, false, false, false, false, false, false, false, false, false, false, false, false, false, false, false, false, false, false, false, true, false, false, true, false, true, true, false, false, false, false, false, false, false, false, false, false, false, false, false, false, false, false, false, false, false, false, false, false, false, false, false, false, false, true, false, false, false, false, false, true, false, false, true, false, false, false, false, false, false, false, true, false, false, true, false, false, false, true, false, false, false, true, false, false, true, false, false, true, false, false, false, true, false, false, false, true, true, false, false, false, true, false, false, false, true, false, false, false, true, false, false, false, false, false, false, false, false, false, false, false, false, false, false, false, false, false, false, false, false, true, false, true, true, false, false, false, true, true, false, false, false, false, true, false, false, false, false, false, false, false, false, false, false, true, false, true, true, false, true, false, false, true, false, false, false, false, false, false, true, false, true, false, false, false, false, false, false, false, true, true, true, false, false, false, true, true, false, false, true, true, false, true, false, false, true, false, false, false, false, false, false, false, false, false, false, true, false, true, false, true, false, false, false, false, false, false, false, false, true, false, false, true, false, false, true, false, true, false, false, false, false, false, false, false, false, false, true, true, false, true, false, false, false, false, true, true, true, false, false, false, false, false, true, false, true, true, false, false, false, true, true, false, false, true, false, false, false, false, false, true, false, true, true, false, true, false, false, false, false, false, false, false, true, false, true, false, false, true, false, true, false, true, false, true, false, false, false, false, false, false, true, false, false, false, true, false, true, false, false, false, false, true, false, true, false, false, false, false, false, false, false, false, false, false, false, true, false, true, false, false, false, false, false, true, false, true, false, false, false, false, true, false, false, false, false, false, false, false, true, false, false, false, false, false, false, true, false, false, true, false, false, true, false, false, false, false, false, false, false, false, false, false, false, false, false, false, false, true, false, false, false, false, false, false, false, false, false, false, false, true, false, false, false, false, false, false, false, false, false, false, false, false, false, false, false, false, false, false, false, false, false, false, false, false, false, false, false, false, false, false, false, false, false, false, false, false, false], [false, false, false, false, false, false, false, false, false, false, false, false, false, false, false, false, false, false, false, false, false, false, false, false, false, false, false, false, false, false, false, false, false, false, false, false, false, false, false, false, false, true, true, false, false, false, false, false, false, false, false, true, false, false, false, false, false, false, false, true, false, false, true, true, true, false, false, false, true, true, false, true, false, false, false, true, false, false, false, true, false, false, false, true, false, false, false, false, false, false, false, true, false, false, false, false, false, false, false, false, false, false, false, false, false, false, false, false, false, false, false, false, false, false, false, false, false, false, true, false, false, true, false, true, true, false, false, false, false, false, false, false, false, false, false, false, false, false, false, false, false, false, false, false, false, false, false, false, false, false, false, false, true, false, false, false, false, false, true, false, false, true, false, false, false, false, false, false, false, true, false, false, true, false, false, false, true, false, false, false, true, false, false, true, false, false, true, false, false, false, true, false, false, false, true, true, false, false, false, true, false, false, false, true, false, false, false, true, false, false, false, false, false, false, false, false, false, false, false, false, false, false, false, false, false, false, false, false, true, false, true, true, false, false, false, true, true, false, false, false, false, true, false, false, false, false, false, false, false, false, false, false, true, false, true, true, false, true, false, false, true, false, false, false, false, false, false, true, false, true, false, false, false, false, false, false, false, true, true, true, false, false, false, true, true, false, false, true, true, false, true, false, false, true, false, false, false, false, false, false, false, false, false, false, true, false, true, false, true, false, false, false, false, false, false, false, false, true, false, false, true, false, false, true, false, true, false, false, false, false, false, false, false, false, false, true, true, false, true, false, false, false, false, true, true, true, false, false, false, false, false, true, false, true, true, false, false, false, true, true, false, false, true, false, false, false, false, false, true, false, true, true, false, true, false, false, false, false, false, false, false, true, false, true, false, false, true, false, true, false, true, false, true, false, false, false, false, false, false, true, false, false, false, true, false, true, false, false, false, false, true, false, true, false, false, false, false, false, false, false, false, false, false, false, true, false, true, false, false, false, false, false, true, false, true, false, false, false, false, true, false, false, false, false, false, false, false, true, false, false, false, false, false, false, true, false, false, true, false, false, true, false, false, false, false, false, false, false, false, false, false, false, false, false, false, false, true, false, false, false, false, false, false, false, false, false, false, false, true, false, false, false, false, false, false, false, false, false, false, false, false, false, false, false, false, false, false, false, false, false, false, false, false, false, false, false, false, false, false, false, false, false, false, false, false, false], [false, false, false, false, false, false, false, false, false, false, false, false, false, false, false, false, false, false, false, false, false, false, false, false, false, false, false, false, false, false, false, false, false, false, false, false, false, false, false, false, false, true, true, false, false, false, false, false, false, false, false, true, false, false, false, false, false, false, false, true, false, false, true, true, true, false, false, false, true, true, false, true, false, false, false, true, false, false, false, true, false, false, false, true, false, false, false, false, false, false, false, true, false, false, false, false, false, false, false, false, false, false, false, false, false, false, false, false, false, false, false, false, false, false, false, false, false, false, true, false, false, true, false, true, true, false, false, false, false, false, false, false, false, false, false, false, false, false, false, false, false, false, false, false, false, false, false, false, false, false, false, false, true, false, false, false, false, false, true, false, false, true, false, false, false, false, false, false, false, true, false, false, true, false, false, false, true, false, false, false, true, false, false, true, false, false, true, false, false, false, true, false, false, false, true, true, false, false, false, true, false, false, false, true, false, false, false, true, false, false, false, false, false, false, false, false, false, false, false, false, false, false, false, false, false, false, false, false, true, false, true, true, false, false, false, true, true, false, false, false, false, true, false, false, false, false, false, false, false, false, false, false, true, false, true, true, false, true, false, false, true, false, false, false, false, false, false, true, false, true, false, false, false, false, false, false, false, true, true, true, false, false, false, true, true, false, false, true, true, false, true, false, false, true, false, false, false, false, false, false, false, false, false, false, true, false, true, false, true, false, false, false, false, false, false, false, false, true, false, false, true, false, false, true, false, true, false, false, false, false, false, false, false, false, false, true, true, false, true, false, false, false, false, true, true, true, false, false, false, false, false, true, false, true, true, false, false, false, true, true, false, false, true, false, false, false, false, false, true, false, true, true, false, true, false, false, false, false, false, false, false, true, false, true, false, false, true, false, true, false, true, false, true, false, false, false, false, false, false, true, false, false, false, true, false, true, false, false, false, false, true, false, true, false, false, false, false, false, false, false, false, false, false, false, true, false, true, false, false, false, false, false, true, false, true, false, false, false, false, true, false, false, false, false, false, false, false, true, false, false, false, false, false, false, true, false, false, true, false, false, true, false, false, false, false, false, false, false, false, false, false, false, false, false, false, false, true, false, false, false, false, false, false, false, false, false, false, false, true, false, false, false, false, false, false, false, false, false, false, false, false, false, false, false, false, false, false, false, false, false, false, false, false, false, false, false, false, false, false, false, false, false, false, false, false, false], [false, false, false, false, false, false, false, false, false, false, false, false, false, false, false, false, false, false, false, false, false, false, false, false, false, false, false, false, false, false, false, false, false, false, false, false, false, false, false, false, false, true, true, false, false, false, false, false, false, false, false, true, false, false, false, false, false, false, false, true, false, false, true, true, true, false, false, false, true, true, false, true, false, false, false, true, false, false, false, true, false, false, false, true, false, false, false, false, false, false, false, true, false, false, false, false, false, false, false, false, false, false, false, false, false, false, false, false, false, false, false, false, false, false, false, false, false, false, true, false, false, true, false, true, true, false, false, false, false, false, false, false, false, false, false, false, false, false, false, false, false, false, false, false, false, false, false, false, false, false, false, false, true, false, false, false, false, false, true, false, false, true, false, false, false, false, false, false, false, true, false, false, true, false, false, false, true, false, false, false, true, false, false, true, false, false, true, false, false, false, true, false, false, false, true, true, false, false, false, true, false, false, false, true, false, false, false, true, false, false, false, false, false, false, false, false, false, false, false, false, false, false, false, false, false, false, false, false, true, false, true, true, false, false, false, true, true, false, false, false, false, true, false, false, false, false, false, false, false, false, false, false, true, false, true, true, false, true, false, false, true, false, false, false, false, false, false, true, false, true, false, false, false, false, false, false, false, true, true, true, false, false, false, true, true, false, false, true, true, false, true, false, false, true, false, false, false, false, false, false, false, false, false, false, true, false, true, false, true, false, false, false, false, false, false, false, false, true, false, false, true, false, false, true, false, true, false, false, false, false, false, false, false, false, false, true, true, false, true, false, false, false, false, true, true, true, false, false, false, false, false, true, false, true, true, false, false, false, true, true, false, false, true, false, false, false, false, false, true, false, true, true, false, true, false, false, false, false, false, false, false, true, false, true, false, false, true, false, true, false, true, false, true, false, false, false, false, false, false, true, false, false, false, true, false, true, false, false, false, false, true, false, true, false, false, false, false, false, false, false, false, false, false, false, true, false, true, false, false, false, false, false, true, false, true, false, false, false, false, true, false, false, false, false, false, false, false, true, false, false, false, false, false, false, true, false, false, true, false, false, true, false, false, false, false, false, false, false, false, false, false, false, false, false, false, false, true, false, false, false, false, false, false, false, false, false, false, false, true, false, false, false, false, false, false, false, false, false, false, false, false, false, false, false, false, false, false, false, false, false, false, false, false, false, false, false, false, false, false, false, false, false, false, false, false, false], [false, false, false, false, false, false, false, false, false, false, false, false, false, false, false, false, false, false, false, false, false, false, false, false, false, false, false, false, false, false, false, false, false, false, false, false, false, false, false, false, false, true, true, false, false, false, false, false, false, false, false, true, false, false, false, false, false, false, false, true, false, false, true, true, true, false, false, false, true, true, false, true, false, false, false, true, false, false, false, true, false, false, false, true, false, false, false, false, false, false, false, true, false, false, false, false, false, false, false, false, false, false, false, false, false, false, false, false, false, false, false, false, false, false, false, false, false, false, true, false, false, true, false, true, true, false, false, false, false, false, false, false, false, false, false, false, false, false, false, false, false, false, false, false, false, false, false, false, false, false, false, false, true, false, false, false, false, false, true, false, false, true, false, false, false, false, false, false, false, true, false, false, true, false, false, false, true, false, false, false, true, false, false, true, false, false, true, false, false, false, true, false, false, false, true, true, false, false, false, true, false, false, false, true, false, false, false, true, false, false, false, false, false, false, false, false, false, false, false, false, false, false, false, false, false, false, false, false, true, false, true, true, false, false, false, true, true, false, false, false, false, true, false, false, false, false, false, false, false, false, false, false, true, false, true, true, false, true, false, false, true, false, false, false, false, false, false, true, false, true, false, false, false, false, false, false, false, true, true, true, false, false, false, true, true, false, false, true, true, false, true, false, false, true, false, false, false, false, false, false, false, false, false, false, true, false, true, false, true, false, false, false, false, false, false, false, false, true, false, false, true, false, false, true, false, true, false, false, false, false, false, false, false, false, false, true, true, false, true, false, false, false, false, true, true, true, false, false, false, false, false, true, false, true, true, false, false, false, true, true, false, false, true, false, false, false, false, false, true, false, true, true, false, true, false, false, false, false, false, false, false, true, false, true, false, false, true, false, true, false, true, false, true, false, false, false, false, false, false, true, false, false, false, true, false, true, false, false, false, false, true, false, true, false, false, false, false, false, false, false, false, false, false, false, true, false, true, false, false, false, false, false, true, false, true, false, false, false, false, true, false, false, false, false, false, false, false, true, false, false, false, false, false, false, true, false, false, true, false, false, true, false, false, false, false, false, false, false, false, false, false, false, false, false, false, false, true, false, false, false, false, false, false, false, false, false, false, false, true, false, false, false, false, false, false, false, false, false, false, false, false, false, false, false, false, false, false, false, false, false, false, false, false, false, false, false, false, false, false, false, false, false, false, false, false, false], [false, false, false, false, false, false, false, false, false, false, false, false, false, false, false, false, false, false, false, false, false, false, false, false, false, false, false, false, false, false, false, false, false, false, false, false, false, false, false, false, false, true, true, false, false, false, false, false, false, false, false, true, false, false, false, false, false, false, false, true, false, false, true, true, true, false, false, false, true, true, false, true, false, false, false, true, false, false, false, true, false, false, false, true, false, false, false, false, false, false, false, true, false, false, false, false, false, false, false, false, false, false, false, false, false, false, false, false, false, false, false, false, false, false, false, false, false, false, true, false, false, true, false, true, true, false, false, false, false, false, false, false, false, false, false, false, false, false, false, false, false, false, false, false, false, false, false, false, false, false, false, false, true, false, false, false, false, false, true, false, false, true, false, false, false, false, false, false, false, true, false, false, true, false, false, false, true, false, false, false, true, false, false, true, false, false, true, false, false, false, true, false, false, false, true, true, false, false, false, true, false, false, false, true, false, false, false, true, false, false, false, false, false, false, false, false, false, false, false, false, false, false, false, false, false, false, false, false, true, false, true, true, false, false, false, true, true, false, false, false, false, true, false, false, false, false, false, false, false, false, false, false, true, false, true, true, false, true, false, false, true, false, false, false, false, false, false, true, false, true, false, false, false, false, false, false, false, true, true, true, false, false, false, true, true, false, false, true, true, false, true, false, false, true, false, false, false, false, false, false, false, false, false, false, true, false, true, false, true, false, false, false, false, false, false, false, false, true, false, false, true, false, false, true, false, true, false, false, false, false, false, false, false, false, false, true, true, false, true, false, false, false, false, true, true, true, false, false, false, false, false, true, false, true, true, false, false, false, true, true, false, false, true, false, false, false, false, false, true, false, true, true, false, true, false, false, false, false, false, false, false, true, false, true, false, false, true, false, true, false, true, false, true, false, false, false, false, false, false, true, false, false, false, true, false, true, false, false, false, false, true, false, true, false, false, false, false, false, false, false, false, false, false, false, true, false, true, false, false, false, false, false, true, false, true, false, false, false, false, true, false, false, false, false, false, false, false, true, false, false, false, false, false, false, true, false, false, true, false, false, true, false, false, false, false, false, false, false, false, false, false, false, false, false, false, false, true, false, false, false, false, false, false, false, false, false, false, false, true, false, false, false, false, false, false, false, false, false, false, false, false, false, false, false, false, false, false, false, false, false, false, false, false, false, false, false, false, false, false, false, false, false, false, false, false, false], [false, false, false, false, false, false, false, false, false, false, false, false, false, false, false, false, false, false, false, false, false, false, false, false, false, false, false, false, false, false, false, false, false, false, false, false, false, false, false, false, false, true, true, false, false, false, false, false, false, false, false, true, false, false, false, false, false, false, false, true, false, false, true, true, true, false, false, false, true, true, false, true, false, false, false, true, false, false, false, true, false, false, false, true, false, false, false, false, false, false, false, true, false, false, false, false, false, false, false, false, false, false, false, false, false, false, false, false, false, false, false, false, false, false, false, false, false, false, true, false, false, true, false, true, true, false, false, false, false, false, false, false, false, false, false, false, false, false, false, false, false, false, false, false, false, false, false, false, false, false, false, false, true, false, false, false, false, false, true, false, false, true, false, false, false, false, false, false, false, true, false, false, true, false, false, false, true, false, false, false, true, false, false, true, false, false, true, false, false, false, true, false, false, false, true, true, false, false, false, true, false, false, false, true, false, false, false, true, false, false, false, false, false, false, false, false, false, false, false, false, false, false, false, false, false, false, false, false, true, false, true, true, false, false, false, true, true, false, false, false, false, true, false, false, false, false, false, false, false, false, false, false, true, false, true, true, false, true, false, false, true, false, false, false, false, false, false, true, false, true, false, false, false, false, false, false, false, true, true, true, false, false, false, true, true, false, false, true, true, false, true, false, false, true, false, false, false, false, false, false, false, false, false, false, true, false, true, false, true, false, false, false, false, false, false, false, false, true, false, false, true, false, false, true, false, true, false, false, false, false, false, false, false, false, false, true, true, false, true, false, false, false, false, true, true, true, false, false, false, false, false, true, false, true, true, false, false, false, true, true, false, false, true, false, false, false, false, false, true, false, true, true, false, true, false, false, false, false, false, false, false, true, false, true, false, false, true, false, true, false, true, false, true, false, false, false, false, false, false, true, false, false, false, true, false, true, false, false, false, false, true, false, true, false, false, false, false, false, false, false, false, false, false, false, true, false, true, false, false, false, false, false, true, false, true, false, false, false, false, true, false, false, false, false, false, false, false, true, false, false, false, false, false, false, true, false, false, true, false, false, true, false, false, false, false, false, false, false, false, false, false, false, false, false, false, false, true, false, false, false, false, false, false, false, false, false, false, false, true, false, false, false, false, false, false, false, false, false, false, false, false, false, false, false, false, false, false, false, false, false, false, false, false, false, false, false, false, false, false, false, false, false, false, false, false, false], [false, false, false, false, false, false, false, false, false, false, false, false, false, false, false, false, false, false, false, false, false, false, false, false, false, false, false, false, false, false, false, false, false, false, false, false, false, false, false, false, false, true, true, false, false, false, false, false, false, false, false, true, false, false, false, false, false, false, false, true, false, false, true, true, true, false, false, false, true, true, false, true, false, false, false, true, false, false, false, true, false, false, false, true, false, false, false, false, false, false, false, true, false, false, false, false, false, false, false, false, false, false, false, false, false, false, false, false, false, false, false, false, false, false, false, false, false, false, true, false, false, true, false, true, true, false, false, false, false, false, false, false, false, false, false, false, false, false, false, false, false, false, false, false, false, false, false, false, false, false, false, false, true, false, false, false, false, false, true, false, false, true, false, false, false, false, false, false, false, true, false, false, true, false, false, false, true, false, false, false, true, false, false, true, false, false, true, false, false, false, true, false, false, false, true, true, false, false, false, true, false, false, false, true, false, false, false, true, false, false, false, false, false, false, false, false, false, false, false, false, false, false, false, false, false, false, false, false, true, false, true, true, false, false, false, true, true, false, false, false, false, true, false, false, false, false, false, false, false, false, false, false, true, false, true, true, false, true, false, false, true, false, false, false, false, false, false, true, false, true, false, false, false, false, false, false, false, true, true, true, false, false, false, true, true, false, false, true, true, false, true, false, false, true, false, false, false, false, false, false, false, false, false, false, true, false, true, false, true, false, false, false, false, false, false, false, false, true, false, false, true, false, false, true, false, true, false, false, false, false, false, false, false, false, false, true, true, false, true, false, false, false, false, true, true, true, false, false, false, false, false, true, false, true, true, false, false, false, true, true, false, false, true, false, false, false, false, false, true, false, true, true, false, true, false, false, false, false, false, false, false, true, false, true, false, false, true, false, true, false, true, false, true, false, false, false, false, false, false, true, false, false, false, true, false, true, false, false, false, false, true, false, true, false, false, false, false, false, false, false, false, false, false, false, true, false, true, false, false, false, false, false, true, false, true, false, false, false, false, true, false, false, false, false, false, false, false, true, false, false, false, false, false, false, true, false, false, true, false, false, true, false, false, false, false, false, false, false, false, false, false, false, false, false, false, false, true, false, false, false, false, false, false, false, false, false, false, false, true, false, false, false, false, false, false, false, false, false, false, false, false, false, false, false, false, false, false, false, false, false, false, false, false, false, false, false, false, false, false, false, false, false, false, false, false, false], [false, false, false, false, false, false, false, false, false, false, false, false, false, false, false, false, false, false, false, false, false, false, false, false, false, false, false, false, false, false, false, false, false, false, false, false, false, false, false, false, false, true, true, false, false, false, false, false, false, false, false, true, false, false, false, false, false, false, false, true, false, false, true, true, true, false, false, false, true, true, false, true, false, false, false, true, false, false, false, true, false, false, false, true, false, false, false, false, false, false, false, true, false, false, false, false, false, false, false, false, false, false, false, false, false, false, false, false, false, false, false, false, false, false, false, false, false, false, true, false, false, true, false, true, true, false, false, false, false, false, false, false, false, false, false, false, false, false, false, false, false, false, false, false, false, false, false, false, false, false, false, false, true, false, false, false, false, false, true, false, false, true, false, false, false, false, false, false, false, true, false, false, true, false, false, false, true, false, false, false, true, false, false, true, false, false, true, false, false, false, true, false, false, false, true, true, false, false, false, true, false, false, false, true, false, false, false, true, false, false, false, false, false, false, false, false, false, false, false, false, false, false, false, false, false, false, false, false, true, false, true, true, false, false, false, true, true, false, false, false, false, true, false, false, false, false, false, false, false, false, false, false, true, false, true, true, false, true, false, false, true, false, false, false, false, false, false, true, false, true, false, false, false, false, false, false, false, true, true, true, false, false, false, true, true, false, false, true, true, false, true, false, false, true, false, false, false, false, false, false, false, false, false, false, true, false, true, false, true, false, false, false, false, false, false, false, false, true, false, false, true, false, false, true, false, true, false, false, false, false, false, false, false, false, false, true, true, false, true, false, false, false, false, true, true, true, false, false, false, false, false, true, false, true, true, false, false, false, true, true, false, false, true, false, false, false, false, false, true, false, true, true, false, true, false, false, false, false, false, false, false, true, false, true, false, false, true, false, true, false, true, false, true, false, false, false, false, false, false, true, false, false, false, true, false, true, false, false, false, false, true, false, true, false, false, false, false, false, false, false, false, false, false, false, true, false, true, false, false, false, false, false, true, false, true, false, false, false, false, true, false, false, false, false, false, false, false, true, false, false, false, false, false, false, true, false, false, true, false, false, true, false, false, false, false, false, false, false, false, false, false, false, false, false, false, false, true, false, false, false, false, false, false, false, false, false, false, false, true, false, false, false, false, false, false, false, false, false, false, false, false, false, false, false, false, false, false, false, false, false, false, false, false, false, false, false, false, false, false, false, false, false, false, false, false, false], [false, false, false, false, false, false, false, false, false, false, false, false, false, false, false, false, false, false, false, false, false, false, false, false, false, false, false, false, false, false, false, false, false, false, false, false, false, false, false, false, false, true, true, false, false, false, false, false, false, false, false, true, false, false, false, false, false, false, false, true, false, false, true, true, true, false, false, false, true, true, false, true, false, false, false, true, false, false, false, true, false, false, false, true, false, false, false, false, false, false, false, true, false, false, false, false, false, false, false, false, false, false, false, false, false, false, false, false, false, false, false, false, false, false, false, false, false, false, true, false, false, true, false, true, true, false, false, false, false, false, false, false, false, false, false, false, false, false, false, false, false, false, false, false, false, false, false, false, false, false, false, false, true, false, false, false, false, false, true, false, false, true, false, false, false, false, false, false, false, true, false, false, true, false, false, false, true, false, false, false, true, false, false, true, false, false, true, false, false, false, true, false, false, false, true, true, false, false, false, true, false, false, false, true, false, false, false, true, false, false, false, false, false, false, false, false, false, false, false, false, false, false, false, false, false, false, false, false, true, false, true, true, false, false, false, true, true, false, false, false, false, true, false, false, false, false, false, false, false, false, false, false, true, false, true, true, false, true, false, false, true, false, false, false, false, false, false, true, false, true, false, false, false, false, false, false, false, true, true, true, false, false, false, true, true, false, false, true, true, false, true, false, false, true, false, false, false, false, false, false, false, false, false, false, true, false, true, false, true, false, false, false, false, false, false, false, false, true, false, false, true, false, false, true, false, true, false, false, false, false, false, false, false, false, false, true, true, false, true, false, false, false, false, true, true, true, false, false, false, false, false, true, false, true, true, false, false, false, true, true, false, false, true, false, false, false, false, false, true, false, true, true, false, true, false, false, false, false, false, false, false, true, false, true, false, false, true, false, true, false, true, false, true, false, false, false, false, false, false, true, false, false, false, true, false, true, false, false, false, false, true, false, true, false, false, false, false, false, false, false, false, false, false, false, true, false, true, false, false, false, false, false, true, false, true, false, false, false, false, true, false, false, false, false, false, false, false, true, false, false, false, false, false, false, true, false, false, true, false, false, true, false, false, false, false, false, false, false, false, false, false, false, false, false, false, false, true, false, false, false, false, false, false, false, false, false, false, false, true, false, false, false, false, false, false, false, false, false, false, false, false, false, false, false, false, false, false, false, false, false, false, false, false, false, false, false, false, false, false, false, false, false, false, false, false, false], [false, false, false, false, false, false, false, false, false, false, false, false, false, false, false, false, false, false, false, false, false, false, false, false, false, false, false, false, false, false, false, false, false, false, false, false, false, false, false, false, false, true, true, false, false, false, false, false, false, false, false, true, false, false, false, false, false, false, false, true, false, false, true, true, true, false, false, false, true, true, false, true, false, false, false, true, false, false, false, true, false, false, false, true, false, false, false, false, false, false, false, true, false, false, false, false, false, false, false, false, false, false, false, false, false, false, false, false, false, false, false, false, false, false, false, false, false, false, true, false, false, true, false, true, true, false, false, false, false, false, false, false, false, false, false, false, false, false, false, false, false, false, false, false, false, false, false, false, false, false, false, false, true, false, false, false, false, false, true, false, false, true, false, false, false, false, false, false, false, true, false, false, true, false, false, false, true, false, false, false, true, false, false, true, false, false, true, false, false, false, true, false, false, false, true, true, false, false, false, true, false, false, false, true, false, false, false, true, false, false, false, false, false, false, false, false, false, false, false, false, false, false, false, false, false, false, false, false, true, false, true, true, false, false, false, true, true, false, false, false, false, true, false, false, false, false, false, false, false, false, false, false, true, false, true, true, false, true, false, false, true, false, false, false, false, false, false, true, false, true, false, false, false, false, false, false, false, true, true, true, false, false, false, true, true, false, false, true, true, false, true, false, false, true, false, false, false, false, false, false, false, false, false, false, true, false, true, false, true, false, false, false, false, false, false, false, false, true, false, false, true, false, false, true, false, true, false, false, false, false, false, false, false, false, false, true, true, false, true, false, false, false, false, true, true, true, false, false, false, false, false, true, false, true, true, false, false, false, true, true, false, false, true, false, false, false, false, false, true, false, true, true, false, true, false, false, false, false, false, false, false, true, false, true, false, false, true, false, true, false, true, false, true, false, false, false, false, false, false, true, false, false, false, true, false, true, false, false, false, false, true, false, true, false, false, false, false, false, false, false, false, false, false, false, true, false, true, false, false, false, false, false, true, false, true, false, false, false, false, true, false, false, false, false, false, false, false, true, false, false, false, false, false, false, true, false, false, true, false, false, true, false, false, false, false, false, false, false, false, false, false, false, false, false, false, false, true, false, false, false, false, false, false, false, false, false, false, false, true, false, false, false, false, false, false, false, false, false, false, false, false, false, false, false, false, false, false, false, false, false, false, false, false, false, false, false, false, false, false, false, false, false, false, false, false, false], [false, false, false, false, false, false, false, false, false, false, false, false, false, false, false, false, false, false, false, false, false, false, false, false, false, false, false, false, false, false, false, false, false, false, false, false, false, false, false, false, false, true, true, false, false, false, false, false, false, false, false, true, false, false, false, false, false, false, false, true, false, false, true, true, true, false, false, false, true, true, false, true, false, false, false, true, false, false, false, true, false, false, false, true, false, false, false, false, false, false, false, true, false, false, false, false, false, false, false, false, false, false, false, false, false, false, false, false, false, false, false, false, false, false, false, false, false, false, true, false, false, true, false, true, true, false, false, false, false, false, false, false, false, false, false, false, false, false, false, false, false, false, false, false, false, false, false, false, false, false, false, false, true, false, false, false, false, false, true, false, false, true, false, false, false, false, false, false, false, true, false, false, true, false, false, false, true, false, false, false, true, false, false, true, false, false, true, false, false, false, true, false, false, false, true, true, false, false, false, true, false, false, false, true, false, false, false, true, false, false, false, false, false, false, false, false, false, false, false, false, false, false, false, false, false, false, false, false, true, false, true, true, false, false, false, true, true, false, false, false, false, true, false, false, false, false, false, false, false, false, false, false, true, false, true, true, false, true, false, false, true, false, false, false, false, false, false, true, false, true, false, false, false, false, false, false, false, true, true, true, false, false, false, true, true, false, false, true, true, false, true, false, false, true, false, false, false, false, false, false, false, false, false, false, true, false, true, false, true, false, false, false, false, false, false, false, false, true, false, false, true, false, false, true, false, true, false, false, false, false, false, false, false, false, false, true, true, false, true, false, false, false, false, true, true, true, false, false, false, false, false, true, false, true, true, false, false, false, true, true, false, false, true, false, false, false, false, false, true, false, true, true, false, true, false, false, false, false, false, false, false, true, false, true, false, false, true, false, true, false, true, false, true, false, false, false, false, false, false, true, false, false, false, true, false, true, false, false, false, false, true, false, true, false, false, false, false, false, false, false, false, false, false, false, true, false, true, false, false, false, false, false, true, false, true, false, false, false, false, true, false, false, false, false, false, false, false, true, false, false, false, false, false, false, true, false, false, true, false, false, true, false, false, false, false, false, false, false, false, false, false, false, false, false, false, false, true, false, false, false, false, false, false, false, false, false, false, false, true, false, false, false, false, false, false, false, false, false, false, false, false, false, false, false, false, false, false, false, false, false, false, false, false, false, false, false, false, false, false, false, false, false, false, false, false, false], [false, false, false, false, false, false, false, false, false, false, false, false, false, false, false, false, false, false, false, false, false, false, false, false, false, false, false, false, false, false, false, false, false, false, false, false, false, false, false, false, false, true, true, false, false, false, false, false, false, false, false, true, false, false, false, false, false, false, false, true, false, false, true, true, true, false, false, false, true, true, false, true, false, false, false, true, false, false, false, true, false, false, false, true, false, false, false, false, false, false, false, true, false, false, false, false, false, false, false, false, false, false, false, false, false, false, false, false, false, false, false, false, false, false, false, false, false, false, true, false, false, true, false, true, true, false, false, false, false, false, false, false, false, false, false, false, false, false, false, false, false, false, false, false, false, false, false, false, false, false, false, false, true, false, false, false, false, false, true, false, false, true, false, false, false, false, false, false, false, true, false, false, true, false, false, false, true, false, false, false, true, false, false, true, false, false, true, false, false, false, true, false, false, false, true, true, false, false, false, true, false, false, false, true, false, false, false, true, false, false, false, false, false, false, false, false, false, false, false, false, false, false, false, false, false, false, false, false, true, false, true, true, false, false, false, true, true, false, false, false, false, true, false, false, false, false, false, false, false, false, false, false, true, false, true, true, false, true, false, false, true, false, false, false, false, false, false, true, false, true, false, false, false, false, false, false, false, true, true, true, false, false, false, true, true, false, false, true, true, false, true, false, false, true, false, false, false, false, false, false, false, false, false, false, true, false, true, false, true, false, false, false, false, false, false, false, false, true, false, false, true, false, false, true, false, true, false, false, false, false, false, false, false, false, false, true, true, false, true, false, false, false, false, true, true, true, false, false, false, false, false, true, false, true, true, false, false, false, true, true, false, false, true, false, false, false, false, false, true, false, true, true, false, true, false, false, false, false, false, false, false, true, false, true, false, false, true, false, true, false, true, false, true, false, false, false, false, false, false, true, false, false, false, true, false, true, false, false, false, false, true, false, true, false, false, false, false, false, false, false, false, false, false, false, true, false, true, false, false, false, false, false, true, false, true, false, false, false, false, true, false, false, false, false, false, false, false, true, false, false, false, false, false, false, true, false, false, true, false, false, true, false, false, false, false, false, false, false, false, false, false, false, false, false, false, false, true, false, false, false, false, false, false, false, false, false, false, false, true, false, false, false, false, false, false, false, false, false, false, false, false, false, false, false, false, false, false, false, false, false, false, false, false, false, false, false, false, false, false, false, false, false, false, false, false, false], [false, false, false, false, false, false, false, false, false, false, false, false, false, false, false, false, false, false, false, false, false, false, false, false, false, false, false, false, false, false, false, false, false, false, false, false, false, false, false, false, false, true, true, false, false, false, false, false, false, false, false, true, false, false, false, false, false, false, false, true, false, false, true, true, true, false, false, false, true, true, false, true, false, false, false, true, false, false, false, true, false, false, false, true, false, false, false, false, false, false, false, true, false, false, false, false, false, false, false, false, false, false, false, false, false, false, false, false, false, false, false, false, false, false, false, false, false, false, true, false, false, true, false, true, true, false, false, false, false, false, false, false, false, false, false, false, false, false, false, false, false, false, false, false, false, false, false, false, false, false, false, false, true, false, false, false, false, false, true, false, false, true, false, false, false, false, false, false, false, true, false, false, true, false, false, false, true, false, false, false, true, false, false, true, false, false, true, false, false, false, true, false, false, false, true, true, false, false, false, true, false, false, false, true, false, false, false, true, false, false, false, false, false, false, false, false, false, false, false, false, false, false, false, false, false, false, false, false, true, false, true, true, false, false, false, true, true, false, false, false, false, true, false, false, false, false, false, false, false, false, false, false, true, false, true, true, false, true, false, false, true, false, false, false, false, false, false, true, false, true, false, false, false, false, false, false, false, true, true, true, false, false, false, true, true, false, false, true, true, false, true, false, false, true, false, false, false, false, false, false, false, false, false, false, true, false, true, false, true, false, false, false, false, false, false, false, false, true, false, false, true, false, false, true, false, true, false, false, false, false, false, false, false, false, false, true, true, false, true, false, false, false, false, true, true, true, false, false, false, false, false, true, false, true, true, false, false, false, true, true, false, false, true, false, false, false, false, false, true, false, true, true, false, true, false, false, false, false, false, false, false, true, false, true, false, false, true, false, true, false, true, false, true, false, false, false, false, false, false, true, false, false, false, true, false, true, false, false, false, false, true, false, true, false, false, false, false, false, false, false, false, false, false, false, true, false, true, false, false, false, false, false, true, false, true, false, false, false, false, true, false, false, false, false, false, false, false, true, false, false, false, false, false, false, true, false, false, true, false, false, true, false, false, false, false, false, false, false, false, false, false, false, false, false, false, false, true, false, false, false, false, false, false, false, false, false, false, false, true, false, false, false, false, false, false, false, false, false, false, false, false, false, false, false, false, false, false, false, false, false, false, false, false, false, false, false, false, false, false, false, false, false, false, false, false, false], [false, false, false, false, false, false, false, false, false, false, false, false, false, false, false, false, false, false, false, false, false, false, false, false, false, false, false, false, false, false, false, false, false, false, false, false, false, false, false, false, false, true, true, false, false, false, false, false, false, false, false, true, false, false, false, false, false, false, false, true, false, false, true, true, true, false, false, false, true, true, false, true, false, false, false, true, false, false, false, true, false, false, false, true, false, false, false, false, false, false, false, true, false, false, false, false, false, false, false, false, false, false, false, false, false, false, false, false, false, false, false, false, false, false, false, false, false, false, true, false, false, true, false, true, true, false, false, false, false, false, false, false, false, false, false, false, false, false, false, false, false, false, false, false, false, false, false, false, false, false, false, false, true, false, false, false, false, false, true, false, false, true, false, false, false, false, false, false, false, true, false, false, true, false, false, false, true, false, false, false, true, false, false, true, false, false, true, false, false, false, true, false, false, false, true, true, false, false, false, true, false, false, false, true, false, false, false, true, false, false, false, false, false, false, false, false, false, false, false, false, false, false, false, false, false, false, false, false, true, false, true, true, false, false, false, true, true, false, false, false, false, true, false, false, false, false, false, false, false, false, false, false, true, false, true, true, false, true, false, false, true, false, false, false, false, false, false, true, false, true, false, false, false, false, false, false, false, true, true, true, false, false, false, true, true, false, false, true, true, false, true, false, false, true, false, false, false, false, false, false, false, false, false, false, true, false, true, false, true, false, false, false, false, false, false, false, false, true, false, false, true, false, false, true, false, true, false, false, false, false, false, false, false, false, false, true, true, false, true, false, false, false, false, true, true, true, false, false, false, false, false, true, false, true, true, false, false, false, true, true, false, false, true, false, false, false, false, false, true, false, true, true, false, true, false, false, false, false, false, false, false, true, false, true, false, false, true, false, true, false, true, false, true, false, false, false, false, false, false, true, false, false, false, true, false, true, false, false, false, false, true, false, true, false, false, false, false, false, false, false, false, false, false, false, true, false, true, false, false, false, false, false, true, false, true, false, false, false, false, true, false, false, false, false, false, false, false, true, false, false, false, false, false, false, true, false, false, true, false, false, true, false, false, false, false, false, false, false, false, false, false, false, false, false, false, false, true, false, false, false, false, false, false, false, false, false, false, false, true, false, false, false, false, false, false, false, false, false, false, false, false, false, false, false, false, false, false, false, false, false, false, false, false, false, false, false, false, false, false, false, false, false, false, false, false, false], [false, false, false, false, false, false, false, false, false, false, false, false, false, false, false, false, false, false, false, false, false, false, false, false, false, false, false, false, false, false, false, false, false, false, false, false, false, false, false, false, false, true, true, false, false, false, false, false, false, false, false, true, false, false, false, false, false, false, false, true, false, false, true, true, true, false, false, false, true, true, false, true, false, false, false, true, false, false, false, true, false, false, false, true, false, false, false, false, false, false, false, true, false, false, false, false, false, false, false, false, false, false, false, false, false, false, false, false, false, false, false, false, false, false, false, false, false, false, true, false, false, true, false, true, true, false, false, false, false, false, false, false, false, false, false, false, false, false, false, false, false, false, false, false, false, false, false, false, false, false, false, false, true, false, false, false, false, false, true, false, false, true, false, false, false, false, false, false, false, true, false, false, true, false, false, false, true, false, false, false, true, false, false, true, false, false, true, false, false, false, true, false, false, false, true, true, false, false, false, true, false, false, false, true, false, false, false, true, false, false, false, false, false, false, false, false, false, false, false, false, false, false, false, false, false, false, false, false, true, false, true, true, false, false, false, true, true, false, false, false, false, true, false, false, false, false, false, false, false, false, false, false, true, false, true, true, false, true, false, false, true, false, false, false, false, false, false, true, false, true, false, false, false, false, false, false, false, true, true, true, false, false, false, true, true, false, false, true, true, false, true, false, false, true, false, false, false, false, false, false, false, false, false, false, true, false, true, false, true, false, false, false, false, false, false, false, false, true, false, false, true, false, false, true, false, true, false, false, false, false, false, false, false, false, false, true, true, false, true, false, false, false, false, true, true, true, false, false, false, false, false, true, false, true, true, false, false, false, true, true, false, false, true, false, false, false, false, false, true, false, true, true, false, true, false, false, false, false, false, false, false, true, false, true, false, false, true, false, true, false, true, false, true, false, false, false, false, false, false, true, false, false, false, true, false, true, false, false, false, false, true, false, true, false, false, false, false, false, false, false, false, false, false, false, true, false, true, false, false, false, false, false, true, false, true, false, false, false, false, true, false, false, false, false, false, false, false, true, false, false, false, false, false, false, true, false, false, true, false, false, true, false, false, false, false, false, false, false, false, false, false, false, false, false, false, false, true, false, false, false, false, false, false, false, false, false, false, false, true, false, false, false, false, false, false, false, false, false, false, false, false, false, false, false, false, false, false, false, false, false, false, false, false, false, false, false, false, false, false, false, false, false, false, false, false, false], [false, false, false, false, false, false, false, false, false, false, false, false, false, false, false, false, false, false, false, false, false, false, false, false, false, false, false, false, false, false, false, false, false, false, false, false, false, false, false, false, false, true, true, false, false, false, false, false, false, false, false, true, false, false, false, false, false, false, false, true, false, false, true, true, true, false, false, false, true, true, false, true, false, false, false, true, false, false, false, true, false, false, false, true, false, false, false, false, false, false, false, true, false, false, false, false, false, false, false, false, false, false, false, false, false, false, false, false, false, false, false, false, false, false, false, false, false, false, true, false, false, true, false, true, true, false, false, false, false, false, false, false, false, false, false, false, false, false, false, false, false, false, false, false, false, false, false, false, false, false, false, false, true, false, false, false, false, false, true, false, false, true, false, false, false, false, false, false, false, true, false, false, true, false, false, false, true, false, false, false, true, false, false, true, false, false, true, false, false, false, true, false, false, false, true, true, false, false, false, true, false, false, false, true, false, false, false, true, false, false, false, false, false, false, false, false, false, false, false, false, false, false, false, false, false, false, false, false, true, false, true, true, false, false, false, true, true, false, false, false, false, true, false, false, false, false, false, false, false, false, false, false, true, false, true, true, false, true, false, false, true, false, false, false, false, false, false, true, false, true, false, false, false, false, false, false, false, true, true, true, false, false, false, true, true, false, false, true, true, false, true, false, false, true, false, false, false, false, false, false, false, false, false, false, true, false, true, false, true, false, false, false, false, false, false, false, false, true, false, false, true, false, false, true, false, true, false, false, false, false, false, false, false, false, false, true, true, false, true, false, false, false, false, true, true, true, false, false, false, false, false, true, false, true, true, false, false, false, true, true, false, false, true, false, false, false, false, false, true, false, true, true, false, true, false, false, false, false, false, false, false, true, false, true, false, false, true, false, true, false, true, false, true, false, false, false, false, false, false, true, false, false, false, true, false, true, false, false, false, false, true, false, true, false, false, false, false, false, false, false, false, false, false, false, true, false, true, false, false, false, false, false, true, false, true, false, false, false, false, true, false, false, false, false, false, false, false, true, false, false, false, false, false, false, true, false, false, true, false, false, true, false, false, false, false, false, false, false, false, false, false, false, false, false, false, false, true, false, false, false, false, false, false, false, false, false, false, false, true, false, false, false, false, false, false, false, false, false, false, false, false, false, false, false, false, false, false, false, false, false, false, false, false, false, false, false, false, false, false, false, false, false, false, false, false, false], [false, false, false, false, false, false, false, false, false, false, false, false, false, false, false, false, false, false, false, false, false, false, false, false, false, false, false, false, false, false, false, false, false, false, false, false, false, false, false, false, false, true, true, false, false, false, false, false, false, false, false, true, false, false, false, false, false, false, false, true, false, false, true, true, true, false, false, false, true, true, false, true, false, false, false, true, false, false, false, true, false, false, false, true, false, false, false, false, false, false, false, true, false, false, false, false, false, false, false, false, false, false, false, false, false, false, false, false, false, false, false, false, false, false, false, false, false, false, true, false, false, true, false, true, true, false, false, false, false, false, false, false, false, false, false, false, false, false, false, false, false, false, false, false, false, false, false, false, false, false, false, false, true, false, false, false, false, false, true, false, false, true, false, false, false, false, false, false, false, true, false, false, true, false, false, false, true, false, false, false, true, false, false, true, false, false, true, false, false, false, true, false, false, false, true, true, false, false, false, true, false, false, false, true, false, false, false, true, false, false, false, false, false, false, false, false, false, false, false, false, false, false, false, false, false, false, false, false, true, false, true, true, false, false, false, true, true, false, false, false, false, true, false, false, false, false, false, false, false, false, false, false, true, false, true, true, false, true, false, false, true, false, false, false, false, false, false, true, false, true, false, false, false, false, false, false, false, true, true, true, false, false, false, true, true, false, false, true, true, false, true, false, false, true, false, false, false, false, false, false, false, false, false, false, true, false, true, false, true, false, false, false, false, false, false, false, false, true, false, false, true, false, false, true, false, true, false, false, false, false, false, false, false, false, false, true, true, false, true, false, false, false, false, true, true, true, false, false, false, false, false, true, false, true, true, false, false, false, true, true, false, false, true, false, false, false, false, false, true, false, true, true, false, true, false, false, false, false, false, false, false, true, false, true, false, false, true, false, true, false, true, false, true, false, false, false, false, false, false, true, false, false, false, true, false, true, false, false, false, false, true, false, true, false, false, false, false, false, false, false, false, false, false, false, true, false, true, false, false, false, false, false, true, false, true, false, false, false, false, true, false, false, false, false, false, false, false, true, false, false, false, false, false, false, true, false, false, true, false, false, true, false, false, false, false, false, false, false, false, false, false, false, false, false, false, false, true, false, false, false, false, false, false, false, false, false, false, false, true, false, false, false, false, false, false, false, false, false, false, false, false, false, false, false, false, false, false, false, false, false, false, false, false, false, false, false, false, false, false, false, false, false, false, false, false, false], [false, false, false, false, false, false, false, false, false, false, false, false, false, false, false, false, false, false, false, false, false, false, false, false, false, false, false, false, false, false, false, false, false, false, false, false, false, false, false, false, false, true, true, false, false, false, false, false, false, false, false, true, false, false, false, false, false, false, false, true, false, false, true, true, true, false, false, false, true, true, false, true, false, false, false, true, false, false, false, true, false, false, false, true, false, false, false, false, false, false, false, true, false, false, false, false, false, false, false, false, false, false, false, false, false, false, false, false, false, false, false, false, false, false, false, false, false, false, true, false, false, true, false, true, true, false, false, false, false, false, false, false, false, false, false, false, false, false, false, false, false, false, false, false, false, false, false, false, false, false, false, false, true, false, false, false, false, false, true, false, false, true, false, false, false, false, false, false, false, true, false, false, true, false, false, false, true, false, false, false, true, false, false, true, false, false, true, false, false, false, true, false, false, false, true, true, false, false, false, true, false, false, false, true, false, false, false, true, false, false, false, false, false, false, false, false, false, false, false, false, false, false, false, false, false, false, false, false, true, false, true, true, false, false, false, true, true, false, false, false, false, true, false, false, false, false, false, false, false, false, false, false, true, false, true, true, false, true, false, false, true, false, false, false, false, false, false, true, false, true, false, false, false, false, false, false, false, true, true, true, false, false, false, true, true, false, false, true, true, false, true, false, false, true, false, false, false, false, false, false, false, false, false, false, true, false, true, false, true, false, false, false, false, false, false, false, false, true, false, false, true, false, false, true, false, true, false, false, false, false, false, false, false, false, false, true, true, false, true, false, false, false, false, true, true, true, false, false, false, false, false, true, false, true, true, false, false, false, true, true, false, false, true, false, false, false, false, false, true, false, true, true, false, true, false, false, false, false, false, false, false, true, false, true, false, false, true, false, true, false, true, false, true, false, false, false, false, false, false, true, false, false, false, true, false, true, false, false, false, false, true, false, true, false, false, false, false, false, false, false, false, false, false, false, true, false, true, false, false, false, false, false, true, false, true, false, false, false, false, true, false, false, false, false, false, false, false, true, false, false, false, false, false, false, true, false, false, true, false, false, true, false, false, false, false, false, false, false, false, false, false, false, false, false, false, false, true, false, false, false, false, false, false, false, false, false, false, false, true, false, false, false, false, false, false, false, false, false, false, false, false, false, false, false, false, false, false, false, false, false, false, false, false, false, false, false, false, false, false, false, false, false, false, false, false, false], [false, false, false, false, false, false, false, false, false, false, false, false, false, false, false, false, false, false, false, false, false, false, false, false, false, false, false, false, false, false, false, false, false, false, false, false, false, false, false, false, false, true, true, false, false, false, false, false, false, false, false, true, false, false, false, false, false, false, false, true, false, false, true, true, true, false, false, false, true, true, false, true, false, false, false, true, false, false, false, true, false, false, false, true, false, false, false, false, false, false, false, true, false, false, false, false, false, false, false, false, false, false, false, false, false, false, false, false, false, false, false, false, false, false, false, false, false, false, true, false, false, true, false, true, true, false, false, false, false, false, false, false, false, false, false, false, false, false, false, false, false, false, false, false, false, false, false, false, false, false, false, false, true, false, false, false, false, false, true, false, false, true, false, false, false, false, false, false, false, true, false, false, true, false, false, false, true, false, false, false, true, false, false, true, false, false, true, false, false, false, true, false, false, false, true, true, false, false, false, true, false, false, false, true, false, false, false, true, false, false, false, false, false, false, false, false, false, false, false, false, false, false, false, false, false, false, false, false, true, false, true, true, false, false, false, true, true, false, false, false, false, true, false, false, false, false, false, false, false, false, false, false, true, false, true, true, false, true, false, false, true, false, false, false, false, false, false, true, false, true, false, false, false, false, false, false, false, true, true, true, false, false, false, true, true, false, false, true, true, false, true, false, false, true, false, false, false, false, false, false, false, false, false, false, true, false, true, false, true, false, false, false, false, false, false, false, false, true, false, false, true, false, false, true, false, true, false, false, false, false, false, false, false, false, false, true, true, false, true, false, false, false, false, true, true, true, false, false, false, false, false, true, false, true, true, false, false, false, true, true, false, false, true, false, false, false, false, false, true, false, true, true, false, true, false, false, false, false, false, false, false, true, false, true, false, false, true, false, true, false, true, false, true, false, false, false, false, false, false, true, false, false, false, true, false, true, false, false, false, false, true, false, true, false, false, false, false, false, false, false, false, false, false, false, true, false, true, false, false, false, false, false, true, false, true, false, false, false, false, true, false, false, false, false, false, false, false, true, false, false, false, false, false, false, true, false, false, true, false, false, true, false, false, false, false, false, false, false, false, false, false, false, false, false, false, false, true, false, false, false, false, false, false, false, false, false, false, false, true, false, false, false, false, false, false, false, false, false, false, false, false, false, false, false, false, false, false, false, false, false, false, false, false, false, false, false, false, false, false, false, false, false, false, false, false, false], [false, false, false, false, false, false, false, false, false, false, false, false, false, false, false, false, false, false, false, false, false, false, false, false, false, false, false, false, false, false, false, false, false, false, false, false, false, false, false, false, false, true, true, false, false, false, false, false, false, false, false, true, false, false, false, false, false, false, false, true, false, false, true, true, true, false, false, false, true, true, false, true, false, false, false, true, false, false, false, true, false, false, false, true, false, false, false, false, false, false, false, true, false, false, false, false, false, false, false, false, false, false, false, false, false, false, false, false, false, false, false, false, false, false, false, false, false, false, true, false, false, true, false, true, true, false, false, false, false, false, false, false, false, false, false, false, false, false, false, false, false, false, false, false, false, false, false, false, false, false, false, false, true, false, false, false, false, false, true, false, false, true, false, false, false, false, false, false, false, true, false, false, true, false, false, false, true, false, false, false, true, false, false, true, false, false, true, false, false, false, true, false, false, false, true, true, false, false, false, true, false, false, false, true, false, false, false, true, false, false, false, false, false, false, false, false, false, false, false, false, false, false, false, false, false, false, false, false, true, false, true, true, false, false, false, true, true, false, false, false, false, true, false, false, false, false, false, false, false, false, false, false, true, false, true, true, false, true, false, false, true, false, false, false, false, false, false, true, false, true, false, false, false, false, false, false, false, true, true, true, false, false, false, true, true, false, false, true, true, false, true, false, false, true, false, false, false, false, false, false, false, false, false, false, true, false, true, false, true, false, false, false, false, false, false, false, false, true, false, false, true, false, false, true, false, true, false, false, false, false, false, false, false, false, false, true, true, false, true, false, false, false, false, true, true, true, false, false, false, false, false, true, false, true, true, false, false, false, true, true, false, false, true, false, false, false, false, false, true, false, true, true, false, true, false, false, false, false, false, false, false, true, false, true, false, false, true, false, true, false, true, false, true, false, false, false, false, false, false, true, false, false, false, true, false, true, false, false, false, false, true, false, true, false, false, false, false, false, false, false, false, false, false, false, true, false, true, false, false, false, false, false, true, false, true, false, false, false, false, true, false, false, false, false, false, false, false, true, false, false, false, false, false, false, true, false, false, true, false, false, true, false, false, false, false, false, false, false, false, false, false, false, false, false, false, false, true, false, false, false, false, false, false, false, false, false, false, false, true, false, false, false, false, false, false, false, false, false, false, false, false, false, false, false, false, false, false, false, false, false, false, false, false, false, false, false, false, false, false, false, false, false, false, false, false, false], [false, false, false, false, false, false, false, false, false, false, false, false, false, false, false, false, false, false, false, false, false, false, false, false, false, false, false, false, false, false, false, false, false, false, false, false, false, false, false, false, false, true, true, false, false, false, false, false, false, false, false, true, false, false, false, false, false, false, false, true, false, false, true, true, true, false, false, false, true, true, false, true, false, false, false, true, false, false, false, true, false, false, false, true, false, false, false, false, false, false, false, true, false, false, false, false, false, false, false, false, false, false, false, false, false, false, false, false, false, false, false, false, false, false, false, false, false, false, true, false, false, true, false, true, true, false, false, false, false, false, false, false, false, false, false, false, false, false, false, false, false, false, false, false, false, false, false, false, false, false, false, false, true, false, false, false, false, false, true, false, false, true, false, false, false, false, false, false, false, true, false, false, true, false, false, false, true, false, false, false, true, false, false, true, false, false, true, false, false, false, true, false, false, false, true, true, false, false, false, true, false, false, false, true, false, false, false, true, false, false, false, false, false, false, false, false, false, false, false, false, false, false, false, false, false, false, false, false, true, false, true, true, false, false, false, true, true, false, false, false, false, true, false, false, false, false, false, false, false, false, false, false, true, false, true, true, false, true, false, false, true, false, false, false, false, false, false, true, false, true, false, false, false, false, false, false, false, true, true, true, false, false, false, true, true, false, false, true, true, false, true, false, false, true, false, false, false, false, false, false, false, false, false, false, true, false, true, false, true, false, false, false, false, false, false, false, false, true, false, false, true, false, false, true, false, true, false, false, false, false, false, false, false, false, false, true, true, false, true, false, false, false, false, true, true, true, false, false, false, false, false, true, false, true, true, false, false, false, true, true, false, false, true, false, false, false, false, false, true, false, true, true, false, true, false, false, false, false, false, false, false, true, false, true, false, false, true, false, true, false, true, false, true, false, false, false, false, false, false, true, false, false, false, true, false, true, false, false, false, false, true, false, true, false, false, false, false, false, false, false, false, false, false, false, true, false, true, false, false, false, false, false, true, false, true, false, false, false, false, true, false, false, false, false, false, false, false, true, false, false, false, false, false, false, true, false, false, true, false, false, true, false, false, false, false, false, false, false, false, false, false, false, false, false, false, false, true, false, false, false, false, false, false, false, false, false, false, false, true, false, false, false, false, false, false, false, false, false, false, false, false, false, false, false, false, false, false, false, false, false, false, false, false, false, false, false, false, false, false, false, false, false, false, false, false, false], [false, false, false, false, false, false, false, false, false, false, false, false, false, false, false, false, false, false, false, false, false, false, false, false, false, false, false, false, false, false, false, false, false, false, false, false, false, false, false, false, false, true, true, false, false, false, false, false, false, false, false, true, false, false, false, false, false, false, false, true, false, false, true, true, true, false, false, false, true, true, false, true, false, false, false, true, false, false, false, true, false, false, false, true, false, false, false, false, false, false, false, true, false, false, false, false, false, false, false, false, false, false, false, false, false, false, false, false, false, false, false, false, false, false, false, false, false, false, true, false, false, true, false, true, true, false, false, false, false, false, false, false, false, false, false, false, false, false, false, false, false, false, false, false, false, false, false, false, false, false, false, false, true, false, false, false, false, false, true, false, false, true, false, false, false, false, false, false, false, true, false, false, true, false, false, false, true, false, false, false, true, false, false, true, false, false, true, false, false, false, true, false, false, false, true, true, false, false, false, true, false, false, false, true, false, false, false, true, false, false, false, false, false, false, false, false, false, false, false, false, false, false, false, false, false, false, false, false, true, false, true, true, false, false, false, true, true, false, false, false, false, true, false, false, false, false, false, false, false, false, false, false, true, false, true, true, false, true, false, false, true, false, false, false, false, false, false, true, false, true, false, false, false, false, false, false, false, true, true, true, false, false, false, true, true, false, false, true, true, false, true, false, false, true, false, false, false, false, false, false, false, false, false, false, true, false, true, false, true, false, false, false, false, false, false, false, false, true, false, false, true, false, false, true, false, true, false, false, false, false, false, false, false, false, false, true, true, false, true, false, false, false, false, true, true, true, false, false, false, false, false, true, false, true, true, false, false, false, true, true, false, false, true, false, false, false, false, false, true, false, true, true, false, true, false, false, false, false, false, false, false, true, false, true, false, false, true, false, true, false, true, false, true, false, false, false, false, false, false, true, false, false, false, true, false, true, false, false, false, false, true, false, true, false, false, false, false, false, false, false, false, false, false, false, true, false, true, false, false, false, false, false, true, false, true, false, false, false, false, true, false, false, false, false, false, false, false, true, false, false, false, false, false, false, true, false, false, true, false, false, true, false, false, false, false, false, false, false, false, false, false, false, false, false, false, false, true, false, false, false, false, false, false, false, false, false, false, false, true, false, false, false, false, false, false, false, false, false, false, false, false, false, false, false, false, false, false, false, false, false, false, false, false, false, false, false, false, false, false, false, false, false, false, false, false, false], [false, false, false, false, false, false, false, false, false, false, false, false, false, false, false, false, false, false, false, false, false, false, false, false, false, false, false, false, false, false, false, false, false, false, false, false, false, false, false, false, false, true, true, false, false, false, false, false, false, false, false, true, false, false, false, false, false, false, false, true, false, false, true, true, true, false, false, false, true, true, false, true, false, false, false, true, false, false, false, true, false, false, false, true, false, false, false, false, false, false, false, true, false, false, false, false, false, false, false, false, false, false, false, false, false, false, false, false, false, false, false, false, false, false, false, false, false, false, true, false, false, true, false, true, true, false, false, false, false, false, false, false, false, false, false, false, false, false, false, false, false, false, false, false, false, false, false, false, false, false, false, false, true, false, false, false, false, false, true, false, false, true, false, false, false, false, false, false, false, true, false, false, true, false, false, false, true, false, false, false, true, false, false, true, false, false, true, false, false, false, true, false, false, false, true, true, false, false, false, true, false, false, false, true, false, false, false, true, false, false, false, false, false, false, false, false, false, false, false, false, false, false, false, false, false, false, false, false, true, false, true, true, false, false, false, true, true, false, false, false, false, true, false, false, false, false, false, false, false, false, false, false, true, false, true, true, false, true, false, false, true, false, false, false, false, false, false, true, false, true, false, false, false, false, false, false, false, true, true, true, false, false, false, true, true, false, false, true, true, false, true, false, false, true, false, false, false, false, false, false, false, false, false, false, true, false, true, false, true, false, false, false, false, false, false, false, false, true, false, false, true, false, false, true, false, true, false, false, false, false, false, false, false, false, false, true, true, false, true, false, false, false, false, true, true, true, false, false, false, false, false, true, false, true, true, false, false, false, true, true, false, false, true, false, false, false, false, false, true, false, true, true, false, true, false, false, false, false, false, false, false, true, false, true, false, false, true, false, true, false, true, false, true, false, false, false, false, false, false, true, false, false, false, true, false, true, false, false, false, false, true, false, true, false, false, false, false, false, false, false, false, false, false, false, true, false, true, false, false, false, false, false, true, false, true, false, false, false, false, true, false, false, false, false, false, false, false, true, false, false, false, false, false, false, true, false, false, true, false, false, true, false, false, false, false, false, false, false, false, false, false, false, false, false, false, false, true, false, false, false, false, false, false, false, false, false, false, false, true, false, false, false, false, false, false, false, false, false, false, false, false, false, false, false, false, false, false, false, false, false, false, false, false, false, false, false, false, false, false, false, false, false, false, false, false, false], [false, false, false, false, false, false, false, false, false, false, false, false, false, false, false, false, false, false, false, false, false, false, false, false, false, false, false, false, false, false, false, false, false, false, false, false, false, false, false, false, false, true, true, false, false, false, false, false, false, false, false, true, false, false, false, false, false, false, false, true, false, false, true, true, true, false, false, false, true, true, false, true, false, false, false, true, false, false, false, true, false, false, false, true, false, false, false, false, false, false, false, true, false, false, false, false, false, false, false, false, false, false, false, false, false, false, false, false, false, false, false, false, false, false, false, false, false, false, true, false, false, true, false, true, true, false, false, false, false, false, false, false, false, false, false, false, false, false, false, false, false, false, false, false, false, false, false, false, false, false, false, false, true, false, false, false, false, false, true, false, false, true, false, false, false, false, false, false, false, true, false, false, true, false, false, false, true, false, false, false, true, false, false, true, false, false, true, false, false, false, true, false, false, false, true, true, false, false, false, true, false, false, false, true, false, false, false, true, false, false, false, false, false, false, false, false, false, false, false, false, false, false, false, false, false, false, false, false, true, false, true, true, false, false, false, true, true, false, false, false, false, true, false, false, false, false, false, false, false, false, false, false, true, false, true, true, false, true, false, false, true, false, false, false, false, false, false, true, false, true, false, false, false, false, false, false, false, true, true, true, false, false, false, true, true, false, false, true, true, false, true, false, false, true, false, false, false, false, false, false, false, false, false, false, true, false, true, false, true, false, false, false, false, false, false, false, false, true, false, false, true, false, false, true, false, true, false, false, false, false, false, false, false, false, false, true, true, false, true, false, false, false, false, true, true, true, false, false, false, false, false, true, false, true, true, false, false, false, true, true, false, false, true, false, false, false, false, false, true, false, true, true, false, true, false, false, false, false, false, false, false, true, false, true, false, false, true, false, true, false, true, false, true, false, false, false, false, false, false, true, false, false, false, true, false, true, false, false, false, false, true, false, true, false, false, false, false, false, false, false, false, false, false, false, true, false, true, false, false, false, false, false, true, false, true, false, false, false, false, true, false, false, false, false, false, false, false, true, false, false, false, false, false, false, true, false, false, true, false, false, true, false, false, false, false, false, false, false, false, false, false, false, false, false, false, false, true, false, false, false, false, false, false, false, false, false, false, false, true, false, false, false, false, false, false, false, false, false, false, false, false, false, false, false, false, false, false, false, false, false, false, false, false, false, false, false, false, false, false, false, false, false, false, false, false, false], [false, false, false, false, false, false, false, false, false, false, false, false, false, false, false, false, false, false, false, false, false, false, false, false, false, false, false, false, false, false, false, false, false, false, false, false, false, false, false, false, false, true, true, false, false, false, false, false, false, false, false, true, false, false, false, false, false, false, false, true, false, false, true, true, true, false, false, false, true, true, false, true, false, false, false, true, false, false, false, true, false, false, false, true, false, false, false, false, false, false, false, true, false, false, false, false, false, false, false, false, false, false, false, false, false, false, false, false, false, false, false, false, false, false, false, false, false, false, true, false, false, true, false, true, true, false, false, false, false, false, false, false, false, false, false, false, false, false, false, false, false, false, false, false, false, false, false, false, false, false, false, false, true, false, false, false, false, false, true, false, false, true, false, false, false, false, false, false, false, true, false, false, true, false, false, false, true, false, false, false, true, false, false, true, false, false, true, false, false, false, true, false, false, false, true, true, false, false, false, true, false, false, false, true, false, false, false, true, false, false, false, false, false, false, false, false, false, false, false, false, false, false, false, false, false, false, false, false, true, false, true, true, false, false, false, true, true, false, false, false, false, true, false, false, false, false, false, false, false, false, false, false, true, false, true, true, false, true, false, false, true, false, false, false, false, false, false, true, false, true, false, false, false, false, false, false, false, true, true, true, false, false, false, true, true, false, false, true, true, false, true, false, false, true, false, false, false, false, false, false, false, false, false, false, true, false, true, false, true, false, false, false, false, false, false, false, false, true, false, false, true, false, false, true, false, true, false, false, false, false, false, false, false, false, false, true, true, false, true, false, false, false, false, true, true, true, false, false, false, false, false, true, false, true, true, false, false, false, true, true, false, false, true, false, false, false, false, false, true, false, true, true, false, true, false, false, false, false, false, false, false, true, false, true, false, false, true, false, true, false, true, false, true, false, false, false, false, false, false, true, false, false, false, true, false, true, false, false, false, false, true, false, true, false, false, false, false, false, false, false, false, false, false, false, true, false, true, false, false, false, false, false, true, false, true, false, false, false, false, true, false, false, false, false, false, false, false, true, false, false, false, false, false, false, true, false, false, true, false, false, true, false, false, false, false, false, false, false, false, false, false, false, false, false, false, false, true, false, false, false, false, false, false, false, false, false, false, false, true, false, false, false, false, false, false, false, false, false, false, false, false, false, false, false, false, false, false, false, false, false, false, false, false, false, false, false, false, false, false, false, false, false, false, false, false, false], [false, false, false, false, false, false, false, false, false, false, false, false, false, false, false, false, false, false, false, false, false, false, false, false, false, false, false, false, false, false, false, false, false, false, false, false, false, false, false, false, false, true, true, false, false, false, false, false, false, false, false, true, false, false, false, false, false, false, false, true, false, false, true, true, true, false, false, false, true, true, false, true, false, false, false, true, false, false, false, true, false, false, false, true, false, false, false, false, false, false, false, true, false, false, false, false, false, false, false, false, false, false, false, false, false, false, false, false, false, false, false, false, false, false, false, false, false, false, true, false, false, true, false, true, true, false, false, false, false, false, false, false, false, false, false, false, false, false, false, false, false, false, false, false, false, false, false, false, false, false, false, false, true, false, false, false, false, false, true, false, false, true, false, false, false, false, false, false, false, true, false, false, true, false, false, false, true, false, false, false, true, false, false, true, false, false, true, false, false, false, true, false, false, false, true, true, false, false, false, true, false, false, false, true, false, false, false, true, false, false, false, false, false, false, false, false, false, false, false, false, false, false, false, false, false, false, false, false, true, false, true, true, false, false, false, true, true, false, false, false, false, true, false, false, false, false, false, false, false, false, false, false, true, false, true, true, false, true, false, false, true, false, false, false, false, false, false, true, false, true, false, false, false, false, false, false, false, true, true, true, false, false, false, true, true, false, false, true, true, false, true, false, false, true, false, false, false, false, false, false, false, false, false, false, true, false, true, false, true, false, false, false, false, false, false, false, false, true, false, false, true, false, false, true, false, true, false, false, false, false, false, false, false, false, false, true, true, false, true, false, false, false, false, true, true, true, false, false, false, false, false, true, false, true, true, false, false, false, true, true, false, false, true, false, false, false, false, false, true, false, true, true, false, true, false, false, false, false, false, false, false, true, false, true, false, false, true, false, true, false, true, false, true, false, false, false, false, false, false, true, false, false, false, true, false, true, false, false, false, false, true, false, true, false, false, false, false, false, false, false, false, false, false, false, true, false, true, false, false, false, false, false, true, false, true, false, false, false, false, true, false, false, false, false, false, false, false, true, false, false, false, false, false, false, true, false, false, true, false, false, true, false, false, false, false, false, false, false, false, false, false, false, false, false, false, false, true, false, false, false, false, false, false, false, false, false, false, false, true, false, false, false, false, false, false, false, false, false, false, false, false, false, false, false, false, false, false, false, false, false, false, false, false, false, false, false, false, false, false, false, false, false, false, false, false, false], [false, false, false, false, false, false, false, false, false, false, false, false, false, false, false, false, false, false, false, false, false, false, false, false, false, false, false, false, false, false, false, false, false, false, false, false, false, false, false, false, false, true, true, false, false, false, false, false, false, false, false, true, false, false, false, false, false, false, false, true, false, false, true, true, true, false, false, false, true, true, false, true, false, false, false, true, false, false, false, true, false, false, false, true, false, false, false, false, false, false, false, true, false, false, false, false, false, false, false, false, false, false, false, false, false, false, false, false, false, false, false, false, false, false, false, false, false, false, true, false, false, true, false, true, true, false, false, false, false, false, false, false, false, false, false, false, false, false, false, false, false, false, false, false, false, false, false, false, false, false, false, false, true, false, false, false, false, false, true, false, false, true, false, false, false, false, false, false, false, true, false, false, true, false, false, false, true, false, false, false, true, false, false, true, false, false, true, false, false, false, true, false, false, false, true, true, false, false, false, true, false, false, false, true, false, false, false, true, false, false, false, false, false, false, false, false, false, false, false, false, false, false, false, false, false, false, false, false, true, false, true, true, false, false, false, true, true, false, false, false, false, true, false, false, false, false, false, false, false, false, false, false, true, false, true, true, false, true, false, false, true, false, false, false, false, false, false, true, false, true, false, false, false, false, false, false, false, true, true, true, false, false, false, true, true, false, false, true, true, false, true, false, false, true, false, false, false, false, false, false, false, false, false, false, true, false, true, false, true, false, false, false, false, false, false, false, false, true, false, false, true, false, false, true, false, true, false, false, false, false, false, false, false, false, false, true, true, false, true, false, false, false, false, true, true, true, false, false, false, false, false, true, false, true, true, false, false, false, true, true, false, false, true, false, false, false, false, false, true, false, true, true, false, true, false, false, false, false, false, false, false, true, false, true, false, false, true, false, true, false, true, false, true, false, false, false, false, false, false, true, false, false, false, true, false, true, false, false, false, false, true, false, true, false, false, false, false, false, false, false, false, false, false, false, true, false, true, false, false, false, false, false, true, false, true, false, false, false, false, true, false, false, false, false, false, false, false, true, false, false, false, false, false, false, true, false, false, true, false, false, true, false, false, false, false, false, false, false, false, false, false, false, false, false, false, false, true, false, false, false, false, false, false, false, false, false, false, false, true, false, false, false, false, false, false, false, false, false, false, false, false, false, false, false, false, false, false, false, false, false, false, false, false, false, false, false, false, false, false, false, false, false, false, false, false, false], [false, false, false, false, false, false, false, false, false, false, false, false, false, false, false, false, false, false, false, false, false, false, false, false, false, false, false, false, false, false, false, false, false, false, false, false, false, false, false, false, false, true, true, false, false, false, false, false, false, false, false, true, false, false, false, false, false, false, false, true, false, false, true, true, true, false, false, false, true, true, false, true, false, false, false, true, false, false, false, true, false, false, false, true, false, false, false, false, false, false, false, true, false, false, false, false, false, false, false, false, false, false, false, false, false, false, false, false, false, false, false, false, false, false, false, false, false, false, true, false, false, true, false, true, true, false, false, false, false, false, false, false, false, false, false, false, false, false, false, false, false, false, false, false, false, false, false, false, false, false, false, false, true, false, false, false, false, false, true, false, false, true, false, false, false, false, false, false, false, true, false, false, true, false, false, false, true, false, false, false, true, false, false, true, false, false, true, false, false, false, true, false, false, false, true, true, false, false, false, true, false, false, false, true, false, false, false, true, false, false, false, false, false, false, false, false, false, false, false, false, false, false, false, false, false, false, false, false, true, false, true, true, false, false, false, true, true, false, false, false, false, true, false, false, false, false, false, false, false, false, false, false, true, false, true, true, false, true, false, false, true, false, false, false, false, false, false, true, false, true, false, false, false, false, false, false, false, true, true, true, false, false, false, true, true, false, false, true, true, false, true, false, false, true, false, false, false, false, false, false, false, false, false, false, true, false, true, false, true, false, false, false, false, false, false, false, false, true, false, false, true, false, false, true, false, true, false, false, false, false, false, false, false, false, false, true, true, false, true, false, false, false, false, true, true, true, false, false, false, false, false, true, false, true, true, false, false, false, true, true, false, false, true, false, false, false, false, false, true, false, true, true, false, true, false, false, false, false, false, false, false, true, false, true, false, false, true, false, true, false, true, false, true, false, false, false, false, false, false, true, false, false, false, true, false, true, false, false, false, false, true, false, true, false, false, false, false, false, false, false, false, false, false, false, true, false, true, false, false, false, false, false, true, false, true, false, false, false, false, true, false, false, false, false, false, false, false, true, false, false, false, false, false, false, true, false, false, true, false, false, true, false, false, false, false, false, false, false, false, false, false, false, false, false, false, false, true, false, false, false, false, false, false, false, false, false, false, false, true, false, false, false, false, false, false, false, false, false, false, false, false, false, false, false, false, false, false, false, false, false, false, false, false, false, false, false, false, false, false, false, false, false, false, false, false, false], [false, false, false, false, false, false, false, false, false, false, false, false, false, false, false, false, false, false, false, false, false, false, false, false, false, false, false, false, false, false, false, false, false, false, false, false, false, false, false, false, false, true, true, false, false, false, false, false, false, false, false, true, false, false, false, false, false, false, false, true, false, false, true, true, true, false, false, false, true, true, false, true, false, false, false, true, false, false, false, true, false, false, false, true, false, false, false, false, false, false, false, true, false, false, false, false, false, false, false, false, false, false, false, false, false, false, false, false, false, false, false, false, false, false, false, false, false, false, true, false, false, true, false, true, true, false, false, false, false, false, false, false, false, false, false, false, false, false, false, false, false, false, false, false, false, false, false, false, false, false, false, false, true, false, false, false, false, false, true, false, false, true, false, false, false, false, false, false, false, true, false, false, true, false, false, false, true, false, false, false, true, false, false, true, false, false, true, false, false, false, true, false, false, false, true, true, false, false, false, true, false, false, false, true, false, false, false, true, false, false, false, false, false, false, false, false, false, false, false, false, false, false, false, false, false, false, false, false, true, false, true, true, false, false, false, true, true, false, false, false, false, true, false, false, false, false, false, false, false, false, false, false, true, false, true, true, false, true, false, false, true, false, false, false, false, false, false, true, false, true, false, false, false, false, false, false, false, true, true, true, false, false, false, true, true, false, false, true, true, false, true, false, false, true, false, false, false, false, false, false, false, false, false, false, true, false, true, false, true, false, false, false, false, false, false, false, false, true, false, false, true, false, false, true, false, true, false, false, false, false, false, false, false, false, false, true, true, false, true, false, false, false, false, true, true, true, false, false, false, false, false, true, false, true, true, false, false, false, true, true, false, false, true, false, false, false, false, false, true, false, true, true, false, true, false, false, false, false, false, false, false, true, false, true, false, false, true, false, true, false, true, false, true, false, false, false, false, false, false, true, false, false, false, true, false, true, false, false, false, false, true, false, true, false, false, false, false, false, false, false, false, false, false, false, true, false, true, false, false, false, false, false, true, false, true, false, false, false, false, true, false, false, false, false, false, false, false, true, false, false, false, false, false, false, true, false, false, true, false, false, true, false, false, false, false, false, false, false, false, false, false, false, false, false, false, false, true, false, false, false, false, false, false, false, false, false, false, false, true, false, false, false, false, false, false, false, false, false, false, false, false, false, false, false, false, false, false, false, false, false, false, false, false, false, false, false, false, false, false, false, false, false, false, false, false, false], [false, false, false, false, false, false, false, false, false, false, false, false, false, false, false, false, false, false, false, false, false, false, false, false, false, false, false, false, false, false, false, false, false, false, false, false, false, false, false, false, false, true, true, false, false, false, false, false, false, false, false, true, false, false, false, false, false, false, false, true, false, false, true, true, true, false, false, false, true, true, false, true, false, false, false, true, false, false, false, true, false, false, false, true, false, false, false, false, false, false, false, true, false, false, false, false, false, false, false, false, false, false, false, false, false, false, false, false, false, false, false, false, false, false, false, false, false, false, true, false, false, true, false, true, true, false, false, false, false, false, false, false, false, false, false, false, false, false, false, false, false, false, false, false, false, false, false, false, false, false, false, false, true, false, false, false, false, false, true, false, false, true, false, false, false, false, false, false, false, true, false, false, true, false, false, false, true, false, false, false, true, false, false, true, false, false, true, false, false, false, true, false, false, false, true, true, false, false, false, true, false, false, false, true, false, false, false, true, false, false, false, false, false, false, false, false, false, false, false, false, false, false, false, false, false, false, false, false, true, false, true, true, false, false, false, true, true, false, false, false, false, true, false, false, false, false, false, false, false, false, false, false, true, false, true, true, false, true, false, false, true, false, false, false, false, false, false, true, false, true, false, false, false, false, false, false, false, true, true, true, false, false, false, true, true, false, false, true, true, false, true, false, false, true, false, false, false, false, false, false, false, false, false, false, true, false, true, false, true, false, false, false, false, false, false, false, false, true, false, false, true, false, false, true, false, true, false, false, false, false, false, false, false, false, false, true, true, false, true, false, false, false, false, true, true, true, false, false, false, false, false, true, false, true, true, false, false, false, true, true, false, false, true, false, false, false, false, false, true, false, true, true, false, true, false, false, false, false, false, false, false, true, false, true, false, false, true, false, true, false, true, false, true, false, false, false, false, false, false, true, false, false, false, true, false, true, false, false, false, false, true, false, true, false, false, false, false, false, false, false, false, false, false, false, true, false, true, false, false, false, false, false, true, false, true, false, false, false, false, true, false, false, false, false, false, false, false, true, false, false, false, false, false, false, true, false, false, true, false, false, true, false, false, false, false, false, false, false, false, false, false, false, false, false, false, false, true, false, false, false, false, false, false, false, false, false, false, false, true, false, false, false, false, false, false, false, false, false, false, false, false, false, false, false, false, false, false, false, false, false, false, false, false, false, false, false, false, false, false, false, false, false, false, false, false, false], [false, false, false, false, false, false, false, false, false, false, false, false, false, false, false, false, false, false, false, false, false, false, false, false, false, false, false, false, false, false, false, false, false, false, false, false, false, false, false, false, false, true, true, false, false, false, false, false, false, false, false, true, false, false, false, false, false, false, false, true, false, false, true, true, true, false, false, false, true, true, false, true, false, false, false, true, false, false, false, true, false, false, false, true, false, false, false, false, false, false, false, true, false, false, false, false, false, false, false, false, false, false, false, false, false, false, false, false, false, false, false, false, false, false, false, false, false, false, true, false, false, true, false, true, true, false, false, false, false, false, false, false, false, false, false, false, false, false, false, false, false, false, false, false, false, false, false, false, false, false, false, false, true, false, false, false, false, false, true, false, false, true, false, false, false, false, false, false, false, true, false, false, true, false, false, false, true, false, false, false, true, false, false, true, false, false, true, false, false, false, true, false, false, false, true, true, false, false, false, true, false, false, false, true, false, false, false, true, false, false, false, false, false, false, false, false, false, false, false, false, false, false, false, false, false, false, false, false, true, false, true, true, false, false, false, true, true, false, false, false, false, true, false, false, false, false, false, false, false, false, false, false, true, false, true, true, false, true, false, false, true, false, false, false, false, false, false, true, false, true, false, false, false, false, false, false, false, true, true, true, false, false, false, true, true, false, false, true, true, false, true, false, false, true, false, false, false, false, false, false, false, false, false, false, true, false, true, false, true, false, false, false, false, false, false, false, false, true, false, false, true, false, false, true, false, true, false, false, false, false, false, false, false, false, false, true, true, false, true, false, false, false, false, true, true, true, false, false, false, false, false, true, false, true, true, false, false, false, true, true, false, false, true, false, false, false, false, false, true, false, true, true, false, true, false, false, false, false, false, false, false, true, false, true, false, false, true, false, true, false, true, false, true, false, false, false, false, false, false, true, false, false, false, true, false, true, false, false, false, false, true, false, true, false, false, false, false, false, false, false, false, false, false, false, true, false, true, false, false, false, false, false, true, false, true, false, false, false, false, true, false, false, false, false, false, false, false, true, false, false, false, false, false, false, true, false, false, true, false, false, true, false, false, false, false, false, false, false, false, false, false, false, false, false, false, false, true, false, false, false, false, false, false, false, false, false, false, false, true, false, false, false, false, false, false, false, false, false, false, false, false, false, false, false, false, false, false, false, false, false, false, false, false, false, false, false, false, false, false, false, false, false, false, false, false, false], [false, false, false, false, false, false, false, false, false, false, false, false, false, false, false, false, false, false, false, false, false, false, false, false, false, false, false, false, false, false, false, false, false, false, false, false, false, false, false, false, false, true, true, false, false, false, false, false, false, false, false, true, false, false, false, false, false, false, false, true, false, false, true, true, true, false, false, false, true, true, false, true, false, false, false, true, false, false, false, true, false, false, false, true, false, false, false, false, false, false, false, true, false, false, false, false, false, false, false, false, false, false, false, false, false, false, false, false, false, false, false, false, false, false, false, false, false, false, true, false, false, true, false, true, true, false, false, false, false, false, false, false, false, false, false, false, false, false, false, false, false, false, false, false, false, false, false, false, false, false, false, false, true, false, false, false, false, false, true, false, false, true, false, false, false, false, false, false, false, true, false, false, true, false, false, false, true, false, false, false, true, false, false, true, false, false, true, false, false, false, true, false, false, false, true, true, false, false, false, true, false, false, false, true, false, false, false, true, false, false, false, false, false, false, false, false, false, false, false, false, false, false, false, false, false, false, false, false, true, false, true, true, false, false, false, true, true, false, false, false, false, true, false, false, false, false, false, false, false, false, false, false, true, false, true, true, false, true, false, false, true, false, false, false, false, false, false, true, false, true, false, false, false, false, false, false, false, true, true, true, false, false, false, true, true, false, false, true, true, false, true, false, false, true, false, false, false, false, false, false, false, false, false, false, true, false, true, false, true, false, false, false, false, false, false, false, false, true, false, false, true, false, false, true, false, true, false, false, false, false, false, false, false, false, false, true, true, false, true, false, false, false, false, true, true, true, false, false, false, false, false, true, false, true, true, false, false, false, true, true, false, false, true, false, false, false, false, false, true, false, true, true, false, true, false, false, false, false, false, false, false, true, false, true, false, false, true, false, true, false, true, false, true, false, false, false, false, false, false, true, false, false, false, true, false, true, false, false, false, false, true, false, true, false, false, false, false, false, false, false, false, false, false, false, true, false, true, false, false, false, false, false, true, false, true, false, false, false, false, true, false, false, false, false, false, false, false, true, false, false, false, false, false, false, true, false, false, true, false, false, true, false, false, false, false, false, false, false, false, false, false, false, false, false, false, false, true, false, false, false, false, false, false, false, false, false, false, false, true, false, false, false, false, false, false, false, false, false, false, false, false, false, false, false, false, false, false, false, false, false, false, false, false, false, false, false, false, false, false, false, false, false, false, false, false, false], [false, false, false, false, false, false, false, false, false, false, false, false, false, false, false, false, false, false, false, false, false, false, false, false, false, false, false, false, false, false, false, false, false, false, false, false, false, false, false, false, false, true, true, false, false, false, false, false, false, false, false, true, false, false, false, false, false, false, false, true, false, false, true, true, true, false, false, false, true, true, false, true, false, false, false, true, false, false, false, true, false, false, false, true, false, false, false, false, false, false, false, true, false, false, false, false, false, false, false, false, false, false, false, false, false, false, false, false, false, false, false, false, false, false, false, false, false, false, true, false, false, true, false, true, true, false, false, false, false, false, false, false, false, false, false, false, false, false, false, false, false, false, false, false, false, false, false, false, false, false, false, false, true, false, false, false, false, false, true, false, false, true, false, false, false, false, false, false, false, true, false, false, true, false, false, false, true, false, false, false, true, false, false, true, false, false, true, false, false, false, true, false, false, false, true, true, false, false, false, true, false, false, false, true, false, false, false, true, false, false, false, false, false, false, false, false, false, false, false, false, false, false, false, false, false, false, false, false, true, false, true, true, false, false, false, true, true, false, false, false, false, true, false, false, false, false, false, false, false, false, false, false, true, false, true, true, false, true, false, false, true, false, false, false, false, false, false, true, false, true, false, false, false, false, false, false, false, true, true, true, false, false, false, true, true, false, false, true, true, false, true, false, false, true, false, false, false, false, false, false, false, false, false, false, true, false, true, false, true, false, false, false, false, false, false, false, false, true, false, false, true, false, false, true, false, true, false, false, false, false, false, false, false, false, false, true, true, false, true, false, false, false, false, true, true, true, false, false, false, false, false, true, false, true, true, false, false, false, true, true, false, false, true, false, false, false, false, false, true, false, true, true, false, true, false, false, false, false, false, false, false, true, false, true, false, false, true, false, true, false, true, false, true, false, false, false, false, false, false, true, false, false, false, true, false, true, false, false, false, false, true, false, true, false, false, false, false, false, false, false, false, false, false, false, true, false, true, false, false, false, false, false, true, false, true, false, false, false, false, true, false, false, false, false, false, false, false, true, false, false, false, false, false, false, true, false, false, true, false, false, true, false, false, false, false, false, false, false, false, false, false, false, false, false, false, false, true, false, false, false, false, false, false, false, false, false, false, false, true, false, false, false, false, false, false, false, false, false, false, false, false, false, false, false, false, false, false, false, false, false, false, false, false, false, false, false, false, false, false, false, false, false, false, false, false, false], [false, false, true, false, false, false, false, true, false, false, false, false, false, false, false, false, false, false, false, false, false, false, false, false, false, false, false, false, true, false, true, false, false, true, true, true, true, false, true, true, true, false, false, false, false, false, false, true, false, false, false, false, true, true, true, true, false, false, true, true, true, true, true, true, false, true, false, false, false, false, false, false, true, false, false, false, false, false, false, false, false, true, false, false, false, false, false, false, true, true, false, false, false, true, false, false, false, false, false, false, false, true, false, false, true, false, false, false, false, false, false, false, false, true, false, false, false, false, false, false, true, true, false, false, false, false, false, false, false, false, false, false, false, false, false, false, false, false, false, false, false, false, false, false, false, false, false, false, false, false, false, false, true, false, false, false, false, false, false, true, false, false, false, true, true, false, false, false, false, false, false, false, false, false, false, false, false, false, false, true, false, true, false, false, false, false, false, false, false, false, false, true, false, false, false, false, true, true, false, false, false, false, false, true, false, true, true, false, true, false, false, true, false, false, false, false, true, false, true, false, false, false, false, false, false, true, true, true, false, false, false, false, true, false, false, true, false, false, false, false, true, false, true, true, false, false, false, false, false, true, false, false, false, false, true, false, false, false, false, true, true, false, false, false, false, false, true, false, false, false, true, false, false, false, false, false, false, true, true, true, false, false, false, false, false, false, false, false, false, false, false, false, false, false, false, false, false, false, false, false, false, true, false, false, false, true, false, false, false, false, false, true, true, false, true, false, true, true, false, true, false, false, false, false, false, false, false, false, false, false, true, true, false, false, true, true, false, true, true, false, false, false, false, true, false, false, true, false, false, true, true, false, false, true, false, false, false, false, true, true, true, false, false, false, false, false, true, true, false, true, false, true, false, false, false, false, false, true, false, false, false, true, true, false, false, false, false, true, false, false, false, true, false, false, false, false, true, true, false, true, false, false, false, false, false, false, false, true, false, false, true, false, true, false, true, false, false, false, true, true, true, false, true, false, true, false, true, true, false, false, false, false, true, false, true, false, true, false, false, false, false, false, false, false, false, false, true, false, false, false, false, false, false, false, false, false, false, false, false, false, false, false, false, true, false, false, false, false, false, false, false, false, false, false, false, false, false, false, false, false, false, false, false, false, false, false, false, false, false, false, false, false, false, false, false, false, false, false, false, false, false, false, false, false, false, false, false, false, false, false, false, false, false, false, false, false, false, false, false, false], [false, false, true, false, false, false, false, true, false, false, false, false, false, false, false, false, false, false, false, false, false, false, false, false, false, false, false, false, true, false, true, false, false, true, true, true, true, false, true, true, true, false, false, false, false, false, false, true, false, false, false, false, true, true, true, true, false, false, true, true, true, true, true, true, false, true, false, false, false, false, false, false, true, false, false, false, false, false, false, false, false, true, false, false, false, false, false, false, true, true, false, false, false, true, false, false, false, false, false, false, false, true, false, false, true, false, false, false, false, false, false, false, false, true, false, false, false, false, false, false, true, true, false, false, false, false, false, false, false, false, false, false, false, false, false, false, false, false, false, false, false, false, false, false, false, false, false, false, false, false, false, false, true, false, false, false, false, false, false, true, false, false, false, true, true, false, false, false, false, false, false, false, false, false, false, false, false, false, false, true, false, true, false, false, false, false, false, false, false, false, false, true, false, false, false, false, true, true, false, false, false, false, false, true, false, true, true, false, true, false, false, true, false, false, false, false, true, false, true, false, false, false, false, false, false, true, true, true, false, false, false, false, true, false, false, true, false, false, false, false, true, false, true, true, false, false, false, false, false, true, false, false, false, false, true, false, false, false, false, true, true, false, false, false, false, false, true, false, false, false, true, false, false, false, false, false, false, true, true, true, false, false, false, false, false, false, false, false, false, false, false, false, false, false, false, false, false, false, false, false, false, true, false, false, false, true, false, false, false, false, false, true, true, false, true, false, true, true, false, true, false, false, false, false, false, false, false, false, false, false, true, true, false, false, true, true, false, true, true, false, false, false, false, true, false, false, true, false, false, true, true, false, false, true, false, false, false, false, true, true, true, false, false, false, false, false, true, true, false, true, false, true, false, false, false, false, false, true, false, false, false, true, true, false, false, false, false, true, false, false, false, true, false, false, false, false, true, true, false, true, false, false, false, false, false, false, false, true, false, false, true, false, true, false, true, false, false, false, true, true, true, false, true, false, true, false, true, true, false, false, false, false, true, false, true, false, true, false, false, false, false, false, false, false, false, false, true, false, false, false, false, false, false, false, false, false, false, false, false, false, false, false, false, true, false, false, false, false, false, false, false, false, false, false, false, false, false, false, false, false, false, false, false, false, false, false, false, false, false, false, false, false, false, false, false, false, false, false, false, false, false, false, false, false, false, false, false, false, false, false, false, false, false, false, false, false, false, false, false, false], [false, false, true, false, false, false, false, true, false, false, false, false, false, false, false, false, false, false, false, false, false, false, false, false, false, false, false, false, true, false, true, false, false, true, true, true, true, false, true, true, true, false, false, false, false, false, false, true, false, false, false, false, true, true, true, true, false, false, true, true, true, true, true, true, false, true, false, false, false, false, false, false, true, false, false, false, false, false, false, false, false, true, false, false, false, false, false, false, true, true, false, false, false, true, false, false, false, false, false, false, false, true, false, false, true, false, false, false, false, false, false, false, false, true, false, false, false, false, false, false, true, true, false, false, false, false, false, false, false, false, false, false, false, false, false, false, false, false, false, false, false, false, false, false, false, false, false, false, false, false, false, false, true, false, false, false, false, false, false, true, false, false, false, true, true, false, false, false, false, false, false, false, false, false, false, false, false, false, false, true, false, true, false, false, false, false, false, false, false, false, false, true, false, false, false, false, true, true, false, false, false, false, false, true, false, true, true, false, true, false, false, true, false, false, false, false, true, false, true, false, false, false, false, false, false, true, true, true, false, false, false, false, true, false, false, true, false, false, false, false, true, false, true, true, false, false, false, false, false, true, false, false, false, false, true, false, false, false, false, true, true, false, false, false, false, false, true, false, false, false, true, false, false, false, false, false, false, true, true, true, false, false, false, false, false, false, false, false, false, false, false, false, false, false, false, false, false, false, false, false, false, true, false, false, false, true, false, false, false, false, false, true, true, false, true, false, true, true, false, true, false, false, false, false, false, false, false, false, false, false, true, true, false, false, true, true, false, true, true, false, false, false, false, true, false, false, true, false, false, true, true, false, false, true, false, false, false, false, true, true, true, false, false, false, false, false, true, true, false, true, false, true, false, false, false, false, false, true, false, false, false, true, true, false, false, false, false, true, false, false, false, true, false, false, false, false, true, true, false, true, false, false, false, false, false, false, false, true, false, false, true, false, true, false, true, false, false, false, true, true, true, false, true, false, true, false, true, true, false, false, false, false, true, false, true, false, true, false, false, false, false, false, false, false, false, false, true, false, false, false, false, false, false, false, false, false, false, false, false, false, false, false, false, true, false, false, false, false, false, false, false, false, false, false, false, false, false, false, false, false, false, false, false, false, false, false, false, false, false, false, false, false, false, false, false, false, false, false, false, false, false, false, false, false, false, false, false, false, false, false, false, false, false, false, false, false, false, false, false, false], [false, false, true, false, false, false, false, true, false, false, false, false, false, false, false, false, false, false, false, false, false, false, false, false, false, false, false, false, true, false, true, false, false, true, true, true, true, false, true, true, true, false, false, false, false, false, false, true, false, false, false, false, true, true, true, true, false, false, true, true, true, true, true, true, false, true, false, false, false, false, false, false, true, false, false, false, false, false, false, false, false, true, false, false, false, false, false, false, true, true, false, false, false, true, false, false, false, false, false, false, false, true, false, false, true, false, false, false, false, false, false, false, false, true, false, false, false, false, false, false, true, true, false, false, false, false, false, false, false, false, false, false, false, false, false, false, false, false, false, false, false, false, false, false, false, false, false, false, false, false, false, false, true, false, false, false, false, false, false, true, false, false, false, true, true, false, false, false, false, false, false, false, false, false, false, false, false, false, false, true, false, true, false, false, false, false, false, false, false, false, false, true, false, false, false, false, true, true, false, false, false, false, false, true, false, true, true, false, true, false, false, true, false, false, false, false, true, false, true, false, false, false, false, false, false, true, true, true, false, false, false, false, true, false, false, true, false, false, false, false, true, false, true, true, false, false, false, false, false, true, false, false, false, false, true, false, false, false, false, true, true, false, false, false, false, false, true, false, false, false, true, false, false, false, false, false, false, true, true, true, false, false, false, false, false, false, false, false, false, false, false, false, false, false, false, false, false, false, false, false, false, true, false, false, false, true, false, false, false, false, false, true, true, false, true, false, true, true, false, true, false, false, false, false, false, false, false, false, false, false, true, true, false, false, true, true, false, true, true, false, false, false, false, true, false, false, true, false, false, true, true, false, false, true, false, false, false, false, true, true, true, false, false, false, false, false, true, true, false, true, false, true, false, false, false, false, false, true, false, false, false, true, true, false, false, false, false, true, false, false, false, true, false, false, false, false, true, true, false, true, false, false, false, false, false, false, false, true, false, false, true, false, true, false, true, false, false, false, true, true, true, false, true, false, true, false, true, true, false, false, false, false, true, false, true, false, true, false, false, false, false, false, false, false, false, false, true, false, false, false, false, false, false, false, false, false, false, false, false, false, false, false, false, true, false, false, false, false, false, false, false, false, false, false, false, false, false, false, false, false, false, false, false, false, false, false, false, false, false, false, false, false, false, false, false, false, false, false, false, false, false, false, false, false, false, false, false, false, false, false, false, false, false, false, false, false, false, false, false, false], [false, false, true, false, false, false, false, true, false, false, false, false, false, false, false, false, false, false, false, false, false, false, false, false, false, false, false, false, true, false, true, false, false, true, true, true, true, false, true, true, true, false, false, false, false, false, false, true, false, false, false, false, true, true, true, true, false, false, true, true, true, true, true, true, false, true, false, false, false, false, false, false, true, false, false, false, false, false, false, false, false, true, false, false, false, false, false, false, true, true, false, false, false, true, false, false, false, false, false, false, false, true, false, false, true, false, false, false, false, false, false, false, false, true, false, false, false, false, false, false, true, true, false, false, false, false, false, false, false, false, false, false, false, false, false, false, false, false, false, false, false, false, false, false, false, false, false, false, false, false, false, false, true, false, false, false, false, false, false, true, false, false, false, true, true, false, false, false, false, false, false, false, false, false, false, false, false, false, false, true, false, true, false, false, false, false, false, false, false, false, false, true, false, false, false, false, true, true, false, false, false, false, false, true, false, true, true, false, true, false, false, true, false, false, false, false, true, false, true, false, false, false, false, false, false, true, true, true, false, false, false, false, true, false, false, true, false, false, false, false, true, false, true, true, false, false, false, false, false, true, false, false, false, false, true, false, false, false, false, true, true, false, false, false, false, false, true, false, false, false, true, false, false, false, false, false, false, true, true, true, false, false, false, false, false, false, false, false, false, false, false, false, false, false, false, false, false, false, false, false, false, true, false, false, false, true, false, false, false, false, false, true, true, false, true, false, true, true, false, true, false, false, false, false, false, false, false, false, false, false, true, true, false, false, true, true, false, true, true, false, false, false, false, true, false, false, true, false, false, true, true, false, false, true, false, false, false, false, true, true, true, false, false, false, false, false, true, true, false, true, false, true, false, false, false, false, false, true, false, false, false, true, true, false, false, false, false, true, false, false, false, true, false, false, false, false, true, true, false, true, false, false, false, false, false, false, false, true, false, false, true, false, true, false, true, false, false, false, true, true, true, false, true, false, true, false, true, true, false, false, false, false, true, false, true, false, true, false, false, false, false, false, false, false, false, false, true, false, false, false, false, false, false, false, false, false, false, false, false, false, false, false, false, true, false, false, false, false, false, false, false, false, false, false, false, false, false, false, false, false, false, false, false, false, false, false, false, false, false, false, false, false, false, false, false, false, false, false, false, false, false, false, false, false, false, false, false, false, false, false, false, false, false, false, false, false, false, false, false, false], [false, false, true, false, false, false, false, true, false, false, false, false, false, false, false, false, false, false, false, false, false, false, false, false, false, false, false, false, true, false, true, false, false, true, true, true, true, false, true, true, true, false, false, false, false, false, false, true, false, false, false, false, true, true, true, true, false, false, true, true, true, true, true, true, false, true, false, false, false, false, false, false, true, false, false, false, false, false, false, false, false, true, false, false, false, false, false, false, true, true, false, false, false, true, false, false, false, false, false, false, false, true, false, false, true, false, false, false, false, false, false, false, false, true, false, false, false, false, false, false, true, true, false, false, false, false, false, false, false, false, false, false, false, false, false, false, false, false, false, false, false, false, false, false, false, false, false, false, false, false, false, false, true, false, false, false, false, false, false, true, false, false, false, true, true, false, false, false, false, false, false, false, false, false, false, false, false, false, false, true, false, true, false, false, false, false, false, false, false, false, false, true, false, false, false, false, true, true, false, false, false, false, false, true, false, true, true, false, true, false, false, true, false, false, false, false, true, false, true, false, false, false, false, false, false, true, true, true, false, false, false, false, true, false, false, true, false, false, false, false, true, false, true, true, false, false, false, false, false, true, false, false, false, false, true, false, false, false, false, true, true, false, false, false, false, false, true, false, false, false, true, false, false, false, false, false, false, true, true, true, false, false, false, false, false, false, false, false, false, false, false, false, false, false, false, false, false, false, false, false, false, true, false, false, false, true, false, false, false, false, false, true, true, false, true, false, true, true, false, true, false, false, false, false, false, false, false, false, false, false, true, true, false, false, true, true, false, true, true, false, false, false, false, true, false, false, true, false, false, true, true, false, false, true, false, false, false, false, true, true, true, false, false, false, false, false, true, true, false, true, false, true, false, false, false, false, false, true, false, false, false, true, true, false, false, false, false, true, false, false, false, true, false, false, false, false, true, true, false, true, false, false, false, false, false, false, false, true, false, false, true, false, true, false, true, false, false, false, true, true, true, false, true, false, true, false, true, true, false, false, false, false, true, false, true, false, true, false, false, false, false, false, false, false, false, false, true, false, false, false, false, false, false, false, false, false, false, false, false, false, false, false, false, true, false, false, false, false, false, false, false, false, false, false, false, false, false, false, false, false, false, false, false, false, false, false, false, false, false, false, false, false, false, false, false, false, false, false, false, false, false, false, false, false, false, false, false, false, false, false, false, false, false, false, false, false, false, false, false, false], [false, false, true, false, false, false, false, true, false, false, false, false, false, false, false, false, false, false, false, false, false, false, false, false, false, false, false, false, true, false, true, false, false, true, true, true, true, false, true, true, true, false, false, false, false, false, false, true, false, false, false, false, true, true, true, true, false, false, true, true, true, true, true, true, false, true, false, false, false, false, false, false, true, false, false, false, false, false, false, false, false, true, false, false, false, false, false, false, true, true, false, false, false, true, false, false, false, false, false, false, false, true, false, false, true, false, false, false, false, false, false, false, false, true, false, false, false, false, false, false, true, true, false, false, false, false, false, false, false, false, false, false, false, false, false, false, false, false, false, false, false, false, false, false, false, false, false, false, false, false, false, false, true, false, false, false, false, false, false, true, false, false, false, true, true, false, false, false, false, false, false, false, false, false, false, false, false, false, false, true, false, true, false, false, false, false, false, false, false, false, false, true, false, false, false, false, true, true, false, false, false, false, false, true, false, true, true, false, true, false, false, true, false, false, false, false, true, false, true, false, false, false, false, false, false, true, true, true, false, false, false, false, true, false, false, true, false, false, false, false, true, false, true, true, false, false, false, false, false, true, false, false, false, false, true, false, false, false, false, true, true, false, false, false, false, false, true, false, false, false, true, false, false, false, false, false, false, true, true, true, false, false, false, false, false, false, false, false, false, false, false, false, false, false, false, false, false, false, false, false, false, true, false, false, false, true, false, false, false, false, false, true, true, false, true, false, true, true, false, true, false, false, false, false, false, false, false, false, false, false, true, true, false, false, true, true, false, true, true, false, false, false, false, true, false, false, true, false, false, true, true, false, false, true, false, false, false, false, true, true, true, false, false, false, false, false, true, true, false, true, false, true, false, false, false, false, false, true, false, false, false, true, true, false, false, false, false, true, false, false, false, true, false, false, false, false, true, true, false, true, false, false, false, false, false, false, false, true, false, false, true, false, true, false, true, false, false, false, true, true, true, false, true, false, true, false, true, true, false, false, false, false, true, false, true, false, true, false, false, false, false, false, false, false, false, false, true, false, false, false, false, false, false, false, false, false, false, false, false, false, false, false, false, true, false, false, false, false, false, false, false, false, false, false, false, false, false, false, false, false, false, false, false, false, false, false, false, false, false, false, false, false, false, false, false, false, false, false, false, false, false, false, false, false, false, false, false, false, false, false, false, false, false, false, false, false, false, false, false, false], [false, false, true, false, false, false, false, true, false, false, false, false, false, false, false, false, false, false, false, false, false, false, false, false, false, false, false, false, true, false, true, false, false, true, true, true, true, false, true, true, true, false, false, false, false, false, false, true, false, false, false, false, true, true, true, true, false, false, true, true, true, true, true, true, false, true, false, false, false, false, false, false, true, false, false, false, false, false, false, false, false, true, false, false, false, false, false, false, true, true, false, false, false, true, false, false, false, false, false, false, false, true, false, false, true, false, false, false, false, false, false, false, false, true, false, false, false, false, false, false, true, true, false, false, false, false, false, false, false, false, false, false, false, false, false, false, false, false, false, false, false, false, false, false, false, false, false, false, false, false, false, false, true, false, false, false, false, false, false, true, false, false, false, true, true, false, false, false, false, false, false, false, false, false, false, false, false, false, false, true, false, true, false, false, false, false, false, false, false, false, false, true, false, false, false, false, true, true, false, false, false, false, false, true, false, true, true, false, true, false, false, true, false, false, false, false, true, false, true, false, false, false, false, false, false, true, true, true, false, false, false, false, true, false, false, true, false, false, false, false, true, false, true, true, false, false, false, false, false, true, false, false, false, false, true, false, false, false, false, true, true, false, false, false, false, false, true, false, false, false, true, false, false, false, false, false, false, true, true, true, false, false, false, false, false, false, false, false, false, false, false, false, false, false, false, false, false, false, false, false, false, true, false, false, false, true, false, false, false, false, false, true, true, false, true, false, true, true, false, true, false, false, false, false, false, false, false, false, false, false, true, true, false, false, true, true, false, true, true, false, false, false, false, true, false, false, true, false, false, true, true, false, false, true, false, false, false, false, true, true, true, false, false, false, false, false, true, true, false, true, false, true, false, false, false, false, false, true, false, false, false, true, true, false, false, false, false, true, false, false, false, true, false, false, false, false, true, true, false, true, false, false, false, false, false, false, false, true, false, false, true, false, true, false, true, false, false, false, true, true, true, false, true, false, true, false, true, true, false, false, false, false, true, false, true, false, true, false, false, false, false, false, false, false, false, false, true, false, false, false, false, false, false, false, false, false, false, false, false, false, false, false, false, true, false, false, false, false, false, false, false, false, false, false, false, false, false, false, false, false, false, false, false, false, false, false, false, false, false, false, false, false, false, false, false, false, false, false, false, false, false, false, false, false, false, false, false, false, false, false, false, false, false, false, false, false, false, false, false, false], [false, false, true, false, false, false, false, true, false, false, false, false, false, false, false, false, false, false, false, false, false, false, false, false, false, false, false, false, true, false, true, false, false, true, true, true, true, false, true, true, true, false, false, false, false, false, false, true, false, false, false, false, true, true, true, true, false, false, true, true, true, true, true, true, false, true, false, false, false, false, false, false, true, false, false, false, false, false, false, false, false, true, false, false, false, false, false, false, true, true, false, false, false, true, false, false, false, false, false, false, false, true, false, false, true, false, false, false, false, false, false, false, false, true, false, false, false, false, false, false, true, true, false, false, false, false, false, false, false, false, false, false, false, false, false, false, false, false, false, false, false, false, false, false, false, false, false, false, false, false, false, false, true, false, false, false, false, false, false, true, false, false, false, true, true, false, false, false, false, false, false, false, false, false, false, false, false, false, false, true, false, true, false, false, false, false, false, false, false, false, false, true, false, false, false, false, true, true, false, false, false, false, false, true, false, true, true, false, true, false, false, true, false, false, false, false, true, false, true, false, false, false, false, false, false, true, true, true, false, false, false, false, true, false, false, true, false, false, false, false, true, false, true, true, false, false, false, false, false, true, false, false, false, false, true, false, false, false, false, true, true, false, false, false, false, false, true, false, false, false, true, false, false, false, false, false, false, true, true, true, false, false, false, false, false, false, false, false, false, false, false, false, false, false, false, false, false, false, false, false, false, true, false, false, false, true, false, false, false, false, false, true, true, false, true, false, true, true, false, true, false, false, false, false, false, false, false, false, false, false, true, true, false, false, true, true, false, true, true, false, false, false, false, true, false, false, true, false, false, true, true, false, false, true, false, false, false, false, true, true, true, false, false, false, false, false, true, true, false, true, false, true, false, false, false, false, false, true, false, false, false, true, true, false, false, false, false, true, false, false, false, true, false, false, false, false, true, true, false, true, false, false, false, false, false, false, false, true, false, false, true, false, true, false, true, false, false, false, true, true, true, false, true, false, true, false, true, true, false, false, false, false, true, false, true, false, true, false, false, false, false, false, false, false, false, false, true, false, false, false, false, false, false, false, false, false, false, false, false, false, false, false, false, true, false, false, false, false, false, false, false, false, false, false, false, false, false, false, false, false, false, false, false, false, false, false, false, false, false, false, false, false, false, false, false, false, false, false, false, false, false, false, false, false, false, false, false, false, false, false, false, false, false, false, false, false, false, false, false, false], [false, false, true, false, false, false, false, true, false, false, false, false, false, false, false, false, false, false, false, false, false, false, false, false, false, false, false, false, true, false, true, false, false, true, true, true, true, false, true, true, true, false, false, false, false, false, false, true, false, false, false, false, true, true, true, true, false, false, true, true, true, true, true, true, false, true, false, false, false, false, false, false, true, false, false, false, false, false, false, false, false, true, false, false, false, false, false, false, true, true, false, false, false, true, false, false, false, false, false, false, false, true, false, false, true, false, false, false, false, false, false, false, false, true, false, false, false, false, false, false, true, true, false, false, false, false, false, false, false, false, false, false, false, false, false, false, false, false, false, false, false, false, false, false, false, false, false, false, false, false, false, false, true, false, false, false, false, false, false, true, false, false, false, true, true, false, false, false, false, false, false, false, false, false, false, false, false, false, false, true, false, true, false, false, false, false, false, false, false, false, false, true, false, false, false, false, true, true, false, false, false, false, false, true, false, true, true, false, true, false, false, true, false, false, false, false, true, false, true, false, false, false, false, false, false, true, true, true, false, false, false, false, true, false, false, true, false, false, false, false, true, false, true, true, false, false, false, false, false, true, false, false, false, false, true, false, false, false, false, true, true, false, false, false, false, false, true, false, false, false, true, false, false, false, false, false, false, true, true, true, false, false, false, false, false, false, false, false, false, false, false, false, false, false, false, false, false, false, false, false, false, true, false, false, false, true, false, false, false, false, false, true, true, false, true, false, true, true, false, true, false, false, false, false, false, false, false, false, false, false, true, true, false, false, true, true, false, true, true, false, false, false, false, true, false, false, true, false, false, true, true, false, false, true, false, false, false, false, true, true, true, false, false, false, false, false, true, true, false, true, false, true, false, false, false, false, false, true, false, false, false, true, true, false, false, false, false, true, false, false, false, true, false, false, false, false, true, true, false, true, false, false, false, false, false, false, false, true, false, false, true, false, true, false, true, false, false, false, true, true, true, false, true, false, true, false, true, true, false, false, false, false, true, false, true, false, true, false, false, false, false, false, false, false, false, false, true, false, false, false, false, false, false, false, false, false, false, false, false, false, false, false, false, true, false, false, false, false, false, false, false, false, false, false, false, false, false, false, false, false, false, false, false, false, false, false, false, false, false, false, false, false, false, false, false, false, false, false, false, false, false, false, false, false, false, false, false, false, false, false, false, false, false, false, false, false, false, false, false, false], [false, false, true, false, false, false, false, true, false, false, false, false, false, false, false, false, false, false, false, false, false, false, false, false, false, false, false, false, true, false, true, false, false, true, true, true, true, false, true, true, true, false, false, false, false, false, false, true, false, false, false, false, true, true, true, true, false, false, true, true, true, true, true, true, false, true, false, false, false, false, false, false, true, false, false, false, false, false, false, false, false, true, false, false, false, false, false, false, true, true, false, false, false, true, false, false, false, false, false, false, false, true, false, false, true, false, false, false, false, false, false, false, false, true, false, false, false, false, false, false, true, true, false, false, false, false, false, false, false, false, false, false, false, false, false, false, false, false, false, false, false, false, false, false, false, false, false, false, false, false, false, false, true, false, false, false, false, false, false, true, false, false, false, true, true, false, false, false, false, false, false, false, false, false, false, false, false, false, false, true, false, true, false, false, false, false, false, false, false, false, false, true, false, false, false, false, true, true, false, false, false, false, false, true, false, true, true, false, true, false, false, true, false, false, false, false, true, false, true, false, false, false, false, false, false, true, true, true, false, false, false, false, true, false, false, true, false, false, false, false, true, false, true, true, false, false, false, false, false, true, false, false, false, false, true, false, false, false, false, true, true, false, false, false, false, false, true, false, false, false, true, false, false, false, false, false, false, true, true, true, false, false, false, false, false, false, false, false, false, false, false, false, false, false, false, false, false, false, false, false, false, true, false, false, false, true, false, false, false, false, false, true, true, false, true, false, true, true, false, true, false, false, false, false, false, false, false, false, false, false, true, true, false, false, true, true, false, true, true, false, false, false, false, true, false, false, true, false, false, true, true, false, false, true, false, false, false, false, true, true, true, false, false, false, false, false, true, true, false, true, false, true, false, false, false, false, false, true, false, false, false, true, true, false, false, false, false, true, false, false, false, true, false, false, false, false, true, true, false, true, false, false, false, false, false, false, false, true, false, false, true, false, true, false, true, false, false, false, true, true, true, false, true, false, true, false, true, true, false, false, false, false, true, false, true, false, true, false, false, false, false, false, false, false, false, false, true, false, false, false, false, false, false, false, false, false, false, false, false, false, false, false, false, true, false, false, false, false, false, false, false, false, false, false, false, false, false, false, false, false, false, false, false, false, false, false, false, false, false, false, false, false, false, false, false, false, false, false, false, false, false, false, false, false, false, false, false, false, false, false, false, false, false, false, false, false, false, false, false, false], [false, false, true, false, false, false, false, true, false, false, false, false, false, false, false, false, false, false, false, false, false, false, false, false, false, false, false, false, true, false, true, false, false, true, true, true, true, false, true, true, true, false, false, false, false, false, false, true, false, false, false, false, true, true, true, true, false, false, true, true, true, true, true, true, false, true, false, false, false, false, false, false, true, false, false, false, false, false, false, false, false, true, false, false, false, false, false, false, true, true, false, false, false, true, false, false, false, false, false, false, false, true, false, false, true, false, false, false, false, false, false, false, false, true, false, false, false, false, false, false, true, true, false, false, false, false, false, false, false, false, false, false, false, false, false, false, false, false, false, false, false, false, false, false, false, false, false, false, false, false, false, false, true, false, false, false, false, false, false, true, false, false, false, true, true, false, false, false, false, false, false, false, false, false, false, false, false, false, false, true, false, true, false, false, false, false, false, false, false, false, false, true, false, false, false, false, true, true, false, false, false, false, false, true, false, true, true, false, true, false, false, true, false, false, false, false, true, false, true, false, false, false, false, false, false, true, true, true, false, false, false, false, true, false, false, true, false, false, false, false, true, false, true, true, false, false, false, false, false, true, false, false, false, false, true, false, false, false, false, true, true, false, false, false, false, false, true, false, false, false, true, false, false, false, false, false, false, true, true, true, false, false, false, false, false, false, false, false, false, false, false, false, false, false, false, false, false, false, false, false, false, true, false, false, false, true, false, false, false, false, false, true, true, false, true, false, true, true, false, true, false, false, false, false, false, false, false, false, false, false, true, true, false, false, true, true, false, true, true, false, false, false, false, true, false, false, true, false, false, true, true, false, false, true, false, false, false, false, true, true, true, false, false, false, false, false, true, true, false, true, false, true, false, false, false, false, false, true, false, false, false, true, true, false, false, false, false, true, false, false, false, true, false, false, false, false, true, true, false, true, false, false, false, false, false, false, false, true, false, false, true, false, true, false, true, false, false, false, true, true, true, false, true, false, true, false, true, true, false, false, false, false, true, false, true, false, true, false, false, false, false, false, false, false, false, false, true, false, false, false, false, false, false, false, false, false, false, false, false, false, false, false, false, true, false, false, false, false, false, false, false, false, false, false, false, false, false, false, false, false, false, false, false, false, false, false, false, false, false, false, false, false, false, false, false, false, false, false, false, false, false, false, false, false, false, false, false, false, false, false, false, false, false, false, false, false, false, false, false, false], [false, false, true, false, false, false, false, true, false, false, false, false, false, false, false, false, false, false, false, false, false, false, false, false, false, false, false, false, true, false, true, false, false, true, true, true, true, false, true, true, true, false, false, false, false, false, false, true, false, false, false, false, true, true, true, true, false, false, true, true, true, true, true, true, false, true, false, false, false, false, false, false, true, false, false, false, false, false, false, false, false, true, false, false, false, false, false, false, true, true, false, false, false, true, false, false, false, false, false, false, false, true, false, false, true, false, false, false, false, false, false, false, false, true, false, false, false, false, false, false, true, true, false, false, false, false, false, false, false, false, false, false, false, false, false, false, false, false, false, false, false, false, false, false, false, false, false, false, false, false, false, false, true, false, false, false, false, false, false, true, false, false, false, true, true, false, false, false, false, false, false, false, false, false, false, false, false, false, false, true, false, true, false, false, false, false, false, false, false, false, false, true, false, false, false, false, true, true, false, false, false, false, false, true, false, true, true, false, true, false, false, true, false, false, false, false, true, false, true, false, false, false, false, false, false, true, true, true, false, false, false, false, true, false, false, true, false, false, false, false, true, false, true, true, false, false, false, false, false, true, false, false, false, false, true, false, false, false, false, true, true, false, false, false, false, false, true, false, false, false, true, false, false, false, false, false, false, true, true, true, false, false, false, false, false, false, false, false, false, false, false, false, false, false, false, false, false, false, false, false, false, true, false, false, false, true, false, false, false, false, false, true, true, false, true, false, true, true, false, true, false, false, false, false, false, false, false, false, false, false, true, true, false, false, true, true, false, true, true, false, false, false, false, true, false, false, true, false, false, true, true, false, false, true, false, false, false, false, true, true, true, false, false, false, false, false, true, true, false, true, false, true, false, false, false, false, false, true, false, false, false, true, true, false, false, false, false, true, false, false, false, true, false, false, false, false, true, true, false, true, false, false, false, false, false, false, false, true, false, false, true, false, true, false, true, false, false, false, true, true, true, false, true, false, true, false, true, true, false, false, false, false, true, false, true, false, true, false, false, false, false, false, false, false, false, false, true, false, false, false, false, false, false, false, false, false, false, false, false, false, false, false, false, true, false, false, false, false, false, false, false, false, false, false, false, false, false, false, false, false, false, false, false, false, false, false, false, false, false, false, false, false, false, false, false, false, false, false, false, false, false, false, false, false, false, false, false, false, false, false, false, false, false, false, false, false, false, false, false, false], [false, false, true, false, false, false, false, true, false, false, false, false, false, false, false, false, false, false, false, false, false, false, false, false, false, false, false, false, true, false, true, false, false, true, true, true, true, false, true, true, true, false, false, false, false, false, false, true, false, false, false, false, true, true, true, true, false, false, true, true, true, true, true, true, false, true, false, false, false, false, false, false, true, false, false, false, false, false, false, false, false, true, false, false, false, false, false, false, true, true, false, false, false, true, false, false, false, false, false, false, false, true, false, false, true, false, false, false, false, false, false, false, false, true, false, false, false, false, false, false, true, true, false, false, false, false, false, false, false, false, false, false, false, false, false, false, false, false, false, false, false, false, false, false, false, false, false, false, false, false, false, false, true, false, false, false, false, false, false, true, false, false, false, true, true, false, false, false, false, false, false, false, false, false, false, false, false, false, false, true, false, true, false, false, false, false, false, false, false, false, false, true, false, false, false, false, true, true, false, false, false, false, false, true, false, true, true, false, true, false, false, true, false, false, false, false, true, false, true, false, false, false, false, false, false, true, true, true, false, false, false, false, true, false, false, true, false, false, false, false, true, false, true, true, false, false, false, false, false, true, false, false, false, false, true, false, false, false, false, true, true, false, false, false, false, false, true, false, false, false, true, false, false, false, false, false, false, true, true, true, false, false, false, false, false, false, false, false, false, false, false, false, false, false, false, false, false, false, false, false, false, true, false, false, false, true, false, false, false, false, false, true, true, false, true, false, true, true, false, true, false, false, false, false, false, false, false, false, false, false, true, true, false, false, true, true, false, true, true, false, false, false, false, true, false, false, true, false, false, true, true, false, false, true, false, false, false, false, true, true, true, false, false, false, false, false, true, true, false, true, false, true, false, false, false, false, false, true, false, false, false, true, true, false, false, false, false, true, false, false, false, true, false, false, false, false, true, true, false, true, false, false, false, false, false, false, false, true, false, false, true, false, true, false, true, false, false, false, true, true, true, false, true, false, true, false, true, true, false, false, false, false, true, false, true, false, true, false, false, false, false, false, false, false, false, false, true, false, false, false, false, false, false, false, false, false, false, false, false, false, false, false, false, true, false, false, false, false, false, false, false, false, false, false, false, false, false, false, false, false, false, false, false, false, false, false, false, false, false, false, false, false, false, false, false, false, false, false, false, false, false, false, false, false, false, false, false, false, false, false, false, false, false, false, false, false, false, false, false, false], [false, false, true, false, false, false, false, true, false, false, false, false, false, false, false, false, false, false, false, false, false, false, false, false, false, false, false, false, true, false, true, false, false, true, true, true, true, false, true, true, true, false, false, false, false, false, false, true, false, false, false, false, true, true, true, true, false, false, true, true, true, true, true, true, false, true, false, false, false, false, false, false, true, false, false, false, false, false, false, false, false, true, false, false, false, false, false, false, true, true, false, false, false, true, false, false, false, false, false, false, false, true, false, false, true, false, false, false, false, false, false, false, false, true, false, false, false, false, false, false, true, true, false, false, false, false, false, false, false, false, false, false, false, false, false, false, false, false, false, false, false, false, false, false, false, false, false, false, false, false, false, false, true, false, false, false, false, false, false, true, false, false, false, true, true, false, false, false, false, false, false, false, false, false, false, false, false, false, false, true, false, true, false, false, false, false, false, false, false, false, false, true, false, false, false, false, true, true, false, false, false, false, false, true, false, true, true, false, true, false, false, true, false, false, false, false, true, false, true, false, false, false, false, false, false, true, true, true, false, false, false, false, true, false, false, true, false, false, false, false, true, false, true, true, false, false, false, false, false, true, false, false, false, false, true, false, false, false, false, true, true, false, false, false, false, false, true, false, false, false, true, false, false, false, false, false, false, true, true, true, false, false, false, false, false, false, false, false, false, false, false, false, false, false, false, false, false, false, false, false, false, true, false, false, false, true, false, false, false, false, false, true, true, false, true, false, true, true, false, true, false, false, false, false, false, false, false, false, false, false, true, true, false, false, true, true, false, true, true, false, false, false, false, true, false, false, true, false, false, true, true, false, false, true, false, false, false, false, true, true, true, false, false, false, false, false, true, true, false, true, false, true, false, false, false, false, false, true, false, false, false, true, true, false, false, false, false, true, false, false, false, true, false, false, false, false, true, true, false, true, false, false, false, false, false, false, false, true, false, false, true, false, true, false, true, false, false, false, true, true, true, false, true, false, true, false, true, true, false, false, false, false, true, false, true, false, true, false, false, false, false, false, false, false, false, false, true, false, false, false, false, false, false, false, false, false, false, false, false, false, false, false, false, true, false, false, false, false, false, false, false, false, false, false, false, false, false, false, false, false, false, false, false, false, false, false, false, false, false, false, false, false, false, false, false, false, false, false, false, false, false, false, false, false, false, false, false, false, false, false, false, false, false, false, false, false, false, false, false, false], [false, false, true, false, false, false, false, true, false, false, false, false, false, false, false, false, false, false, false, false, false, false, false, false, false, false, false, false, true, false, true, false, false, true, true, true, true, false, true, true, true, false, false, false, false, false, false, true, false, false, false, false, true, true, true, true, false, false, true, true, true, true, true, true, false, true, false, false, false, false, false, false, true, false, false, false, false, false, false, false, false, true, false, false, false, false, false, false, true, true, false, false, false, true, false, false, false, false, false, false, false, true, false, false, true, false, false, false, false, false, false, false, false, true, false, false, false, false, false, false, true, true, false, false, false, false, false, false, false, false, false, false, false, false, false, false, false, false, false, false, false, false, false, false, false, false, false, false, false, false, false, false, true, false, false, false, false, false, false, true, false, false, false, true, true, false, false, false, false, false, false, false, false, false, false, false, false, false, false, true, false, true, false, false, false, false, false, false, false, false, false, true, false, false, false, false, true, true, false, false, false, false, false, true, false, true, true, false, true, false, false, true, false, false, false, false, true, false, true, false, false, false, false, false, false, true, true, true, false, false, false, false, true, false, false, true, false, false, false, false, true, false, true, true, false, false, false, false, false, true, false, false, false, false, true, false, false, false, false, true, true, false, false, false, false, false, true, false, false, false, true, false, false, false, false, false, false, true, true, true, false, false, false, false, false, false, false, false, false, false, false, false, false, false, false, false, false, false, false, false, false, true, false, false, false, true, false, false, false, false, false, true, true, false, true, false, true, true, false, true, false, false, false, false, false, false, false, false, false, false, true, true, false, false, true, true, false, true, true, false, false, false, false, true, false, false, true, false, false, true, true, false, false, true, false, false, false, false, true, true, true, false, false, false, false, false, true, true, false, true, false, true, false, false, false, false, false, true, false, false, false, true, true, false, false, false, false, true, false, false, false, true, false, false, false, false, true, true, false, true, false, false, false, false, false, false, false, true, false, false, true, false, true, false, true, false, false, false, true, true, true, false, true, false, true, false, true, true, false, false, false, false, true, false, true, false, true, false, false, false, false, false, false, false, false, false, true, false, false, false, false, false, false, false, false, false, false, false, false, false, false, false, false, true, false, false, false, false, false, false, false, false, false, false, false, false, false, false, false, false, false, false, false, false, false, false, false, false, false, false, false, false, false, false, false, false, false, false, false, false, false, false, false, false, false, false, false, false, false, false, false, false, false, false, false, false, false, false, false, false], [false, false, true, false, false, false, false, true, false, false, false, false, false, false, false, false, false, false, false, false, false, false, false, false, false, false, false, false, true, false, true, false, false, true, true, true, true, false, true, true, true, false, false, false, false, false, false, true, false, false, false, false, true, true, true, true, false, false, true, true, true, true, true, true, false, true, false, false, false, false, false, false, true, false, false, false, false, false, false, false, false, true, false, false, false, false, false, false, true, true, false, false, false, true, false, false, false, false, false, false, false, true, false, false, true, false, false, false, false, false, false, false, false, true, false, false, false, false, false, false, true, true, false, false, false, false, false, false, false, false, false, false, false, false, false, false, false, false, false, false, false, false, false, false, false, false, false, false, false, false, false, false, true, false, false, false, false, false, false, true, false, false, false, true, true, false, false, false, false, false, false, false, false, false, false, false, false, false, false, true, false, true, false, false, false, false, false, false, false, false, false, true, false, false, false, false, true, true, false, false, false, false, false, true, false, true, true, false, true, false, false, true, false, false, false, false, true, false, true, false, false, false, false, false, false, true, true, true, false, false, false, false, true, false, false, true, false, false, false, false, true, false, true, true, false, false, false, false, false, true, false, false, false, false, true, false, false, false, false, true, true, false, false, false, false, false, true, false, false, false, true, false, false, false, false, false, false, true, true, true, false, false, false, false, false, false, false, false, false, false, false, false, false, false, false, false, false, false, false, false, false, true, false, false, false, true, false, false, false, false, false, true, true, false, true, false, true, true, false, true, false, false, false, false, false, false, false, false, false, false, true, true, false, false, true, true, false, true, true, false, false, false, false, true, false, false, true, false, false, true, true, false, false, true, false, false, false, false, true, true, true, false, false, false, false, false, true, true, false, true, false, true, false, false, false, false, false, true, false, false, false, true, true, false, false, false, false, true, false, false, false, true, false, false, false, false, true, true, false, true, false, false, false, false, false, false, false, true, false, false, true, false, true, false, true, false, false, false, true, true, true, false, true, false, true, false, true, true, false, false, false, false, true, false, true, false, true, false, false, false, false, false, false, false, false, false, true, false, false, false, false, false, false, false, false, false, false, false, false, false, false, false, false, true, false, false, false, false, false, false, false, false, false, false, false, false, false, false, false, false, false, false, false, false, false, false, false, false, false, false, false, false, false, false, false, false, false, false, false, false, false, false, false, false, false, false, false, false, false, false, false, false, false, false, false, false, false, false, false, false], [false, false, true, false, false, false, false, true, false, false, false, false, false, false, false, false, false, false, false, false, false, false, false, false, false, false, false, false, true, false, true, false, false, true, true, true, true, false, true, true, true, false, false, false, false, false, false, true, false, false, false, false, true, true, true, true, false, false, true, true, true, true, true, true, false, true, false, false, false, false, false, false, true, false, false, false, false, false, false, false, false, true, false, false, false, false, false, false, true, true, false, false, false, true, false, false, false, false, false, false, false, true, false, false, true, false, false, false, false, false, false, false, false, true, false, false, false, false, false, false, true, true, false, false, false, false, false, false, false, false, false, false, false, false, false, false, false, false, false, false, false, false, false, false, false, false, false, false, false, false, false, false, true, false, false, false, false, false, false, true, false, false, false, true, true, false, false, false, false, false, false, false, false, false, false, false, false, false, false, true, false, true, false, false, false, false, false, false, false, false, false, true, false, false, false, false, true, true, false, false, false, false, false, true, false, true, true, false, true, false, false, true, false, false, false, false, true, false, true, false, false, false, false, false, false, true, true, true, false, false, false, false, true, false, false, true, false, false, false, false, true, false, true, true, false, false, false, false, false, true, false, false, false, false, true, false, false, false, false, true, true, false, false, false, false, false, true, false, false, false, true, false, false, false, false, false, false, true, true, true, false, false, false, false, false, false, false, false, false, false, false, false, false, false, false, false, false, false, false, false, false, true, false, false, false, true, false, false, false, false, false, true, true, false, true, false, true, true, false, true, false, false, false, false, false, false, false, false, false, false, true, true, false, false, true, true, false, true, true, false, false, false, false, true, false, false, true, false, false, true, true, false, false, true, false, false, false, false, true, true, true, false, false, false, false, false, true, true, false, true, false, true, false, false, false, false, false, true, false, false, false, true, true, false, false, false, false, true, false, false, false, true, false, false, false, false, true, true, false, true, false, false, false, false, false, false, false, true, false, false, true, false, true, false, true, false, false, false, true, true, true, false, true, false, true, false, true, true, false, false, false, false, true, false, true, false, true, false, false, false, false, false, false, false, false, false, true, false, false, false, false, false, false, false, false, false, false, false, false, false, false, false, false, true, false, false, false, false, false, false, false, false, false, false, false, false, false, false, false, false, false, false, false, false, false, false, false, false, false, false, false, false, false, false, false, false, false, false, false, false, false, false, false, false, false, false, false, false, false, false, false, false, false, false, false, false, false, false, false, false], [false, false, true, false, false, false, false, true, false, false, false, false, false, false, false, false, false, false, false, false, false, false, false, false, false, false, false, false, true, false, true, false, false, true, true, true, true, false, true, true, true, false, false, false, false, false, false, true, false, false, false, false, true, true, true, true, false, false, true, true, true, true, true, true, false, true, false, false, false, false, false, false, true, false, false, false, false, false, false, false, false, true, false, false, false, false, false, false, true, true, false, false, false, true, false, false, false, false, false, false, false, true, false, false, true, false, false, false, false, false, false, false, false, true, false, false, false, false, false, false, true, true, false, false, false, false, false, false, false, false, false, false, false, false, false, false, false, false, false, false, false, false, false, false, false, false, false, false, false, false, false, false, true, false, false, false, false, false, false, true, false, false, false, true, true, false, false, false, false, false, false, false, false, false, false, false, false, false, false, true, false, true, false, false, false, false, false, false, false, false, false, true, false, false, false, false, true, true, false, false, false, false, false, true, false, true, true, false, true, false, false, true, false, false, false, false, true, false, true, false, false, false, false, false, false, true, true, true, false, false, false, false, true, false, false, true, false, false, false, false, true, false, true, true, false, false, false, false, false, true, false, false, false, false, true, false, false, false, false, true, true, false, false, false, false, false, true, false, false, false, true, false, false, false, false, false, false, true, true, true, false, false, false, false, false, false, false, false, false, false, false, false, false, false, false, false, false, false, false, false, false, true, false, false, false, true, false, false, false, false, false, true, true, false, true, false, true, true, false, true, false, false, false, false, false, false, false, false, false, false, true, true, false, false, true, true, false, true, true, false, false, false, false, true, false, false, true, false, false, true, true, false, false, true, false, false, false, false, true, true, true, false, false, false, false, false, true, true, false, true, false, true, false, false, false, false, false, true, false, false, false, true, true, false, false, false, false, true, false, false, false, true, false, false, false, false, true, true, false, true, false, false, false, false, false, false, false, true, false, false, true, false, true, false, true, false, false, false, true, true, true, false, true, false, true, false, true, true, false, false, false, false, true, false, true, false, true, false, false, false, false, false, false, false, false, false, true, false, false, false, false, false, false, false, false, false, false, false, false, false, false, false, false, true, false, false, false, false, false, false, false, false, false, false, false, false, false, false, false, false, false, false, false, false, false, false, false, false, false, false, false, false, false, false, false, false, false, false, false, false, false, false, false, false, false, false, false, false, false, false, false, false, false, false, false, false, false, false, false, false], [false, false, true, false, false, false, false, true, false, false, false, false, false, false, false, false, false, false, false, false, false, false, false, false, false, false, false, false, true, false, true, false, false, true, true, true, true, false, true, true, true, false, false, false, false, false, false, true, false, false, false, false, true, true, true, true, false, false, true, true, true, true, true, true, false, true, false, false, false, false, false, false, true, false, false, false, false, false, false, false, false, true, false, false, false, false, false, false, true, true, false, false, false, true, false, false, false, false, false, false, false, true, false, false, true, false, false, false, false, false, false, false, false, true, false, false, false, false, false, false, true, true, false, false, false, false, false, false, false, false, false, false, false, false, false, false, false, false, false, false, false, false, false, false, false, false, false, false, false, false, false, false, true, false, false, false, false, false, false, true, false, false, false, true, true, false, false, false, false, false, false, false, false, false, false, false, false, false, false, true, false, true, false, false, false, false, false, false, false, false, false, true, false, false, false, false, true, true, false, false, false, false, false, true, false, true, true, false, true, false, false, true, false, false, false, false, true, false, true, false, false, false, false, false, false, true, true, true, false, false, false, false, true, false, false, true, false, false, false, false, true, false, true, true, false, false, false, false, false, true, false, false, false, false, true, false, false, false, false, true, true, false, false, false, false, false, true, false, false, false, true, false, false, false, false, false, false, true, true, true, false, false, false, false, false, false, false, false, false, false, false, false, false, false, false, false, false, false, false, false, false, true, false, false, false, true, false, false, false, false, false, true, true, false, true, false, true, true, false, true, false, false, false, false, false, false, false, false, false, false, true, true, false, false, true, true, false, true, true, false, false, false, false, true, false, false, true, false, false, true, true, false, false, true, false, false, false, false, true, true, true, false, false, false, false, false, true, true, false, true, false, true, false, false, false, false, false, true, false, false, false, true, true, false, false, false, false, true, false, false, false, true, false, false, false, false, true, true, false, true, false, false, false, false, false, false, false, true, false, false, true, false, true, false, true, false, false, false, true, true, true, false, true, false, true, false, true, true, false, false, false, false, true, false, true, false, true, false, false, false, false, false, false, false, false, false, true, false, false, false, false, false, false, false, false, false, false, false, false, false, false, false, false, true, false, false, false, false, false, false, false, false, false, false, false, false, false, false, false, false, false, false, false, false, false, false, false, false, false, false, false, false, false, false, false, false, false, false, false, false, false, false, false, false, false, false, false, false, false, false, false, false, false, false, false, false, false, false, false, false], [false, false, true, false, false, false, false, true, false, false, false, false, false, false, false, false, false, false, false, false, false, false, false, false, false, false, false, false, true, false, true, false, false, true, true, true, true, false, true, true, true, false, false, false, false, false, false, true, false, false, false, false, true, true, true, true, false, false, true, true, true, true, true, true, false, true, false, false, false, false, false, false, true, false, false, false, false, false, false, false, false, true, false, false, false, false, false, false, true, true, false, false, false, true, false, false, false, false, false, false, false, true, false, false, true, false, false, false, false, false, false, false, false, true, false, false, false, false, false, false, true, true, false, false, false, false, false, false, false, false, false, false, false, false, false, false, false, false, false, false, false, false, false, false, false, false, false, false, false, false, false, false, true, false, false, false, false, false, false, true, false, false, false, true, true, false, false, false, false, false, false, false, false, false, false, false, false, false, false, true, false, true, false, false, false, false, false, false, false, false, false, true, false, false, false, false, true, true, false, false, false, false, false, true, false, true, true, false, true, false, false, true, false, false, false, false, true, false, true, false, false, false, false, false, false, true, true, true, false, false, false, false, true, false, false, true, false, false, false, false, true, false, true, true, false, false, false, false, false, true, false, false, false, false, true, false, false, false, false, true, true, false, false, false, false, false, true, false, false, false, true, false, false, false, false, false, false, true, true, true, false, false, false, false, false, false, false, false, false, false, false, false, false, false, false, false, false, false, false, false, false, true, false, false, false, true, false, false, false, false, false, true, true, false, true, false, true, true, false, true, false, false, false, false, false, false, false, false, false, false, true, true, false, false, true, true, false, true, true, false, false, false, false, true, false, false, true, false, false, true, true, false, false, true, false, false, false, false, true, true, true, false, false, false, false, false, true, true, false, true, false, true, false, false, false, false, false, true, false, false, false, true, true, false, false, false, false, true, false, false, false, true, false, false, false, false, true, true, false, true, false, false, false, false, false, false, false, true, false, false, true, false, true, false, true, false, false, false, true, true, true, false, true, false, true, false, true, true, false, false, false, false, true, false, true, false, true, false, false, false, false, false, false, false, false, false, true, false, false, false, false, false, false, false, false, false, false, false, false, false, false, false, false, true, false, false, false, false, false, false, false, false, false, false, false, false, false, false, false, false, false, false, false, false, false, false, false, false, false, false, false, false, false, false, false, false, false, false, false, false, false, false, false, false, false, false, false, false, false, false, false, false, false, false, false, false, false, false, false, false], [false, false, true, false, false, false, false, true, false, false, false, false, false, false, false, false, false, false, false, false, false, false, false, false, false, false, false, false, true, false, true, false, false, true, true, true, true, false, true, true, true, false, false, false, false, false, false, true, false, false, false, false, true, true, true, true, false, false, true, true, true, true, true, true, false, true, false, false, false, false, false, false, true, false, false, false, false, false, false, false, false, true, false, false, false, false, false, false, true, true, false, false, false, true, false, false, false, false, false, false, false, true, false, false, true, false, false, false, false, false, false, false, false, true, false, false, false, false, false, false, true, true, false, false, false, false, false, false, false, false, false, false, false, false, false, false, false, false, false, false, false, false, false, false, false, false, false, false, false, false, false, false, true, false, false, false, false, false, false, true, false, false, false, true, true, false, false, false, false, false, false, false, false, false, false, false, false, false, false, true, false, true, false, false, false, false, false, false, false, false, false, true, false, false, false, false, true, true, false, false, false, false, false, true, false, true, true, false, true, false, false, true, false, false, false, false, true, false, true, false, false, false, false, false, false, true, true, true, false, false, false, false, true, false, false, true, false, false, false, false, true, false, true, true, false, false, false, false, false, true, false, false, false, false, true, false, false, false, false, true, true, false, false, false, false, false, true, false, false, false, true, false, false, false, false, false, false, true, true, true, false, false, false, false, false, false, false, false, false, false, false, false, false, false, false, false, false, false, false, false, false, true, false, false, false, true, false, false, false, false, false, true, true, false, true, false, true, true, false, true, false, false, false, false, false, false, false, false, false, false, true, true, false, false, true, true, false, true, true, false, false, false, false, true, false, false, true, false, false, true, true, false, false, true, false, false, false, false, true, true, true, false, false, false, false, false, true, true, false, true, false, true, false, false, false, false, false, true, false, false, false, true, true, false, false, false, false, true, false, false, false, true, false, false, false, false, true, true, false, true, false, false, false, false, false, false, false, true, false, false, true, false, true, false, true, false, false, false, true, true, true, false, true, false, true, false, true, true, false, false, false, false, true, false, true, false, true, false, false, false, false, false, false, false, false, false, true, false, false, false, false, false, false, false, false, false, false, false, false, false, false, false, false, true, false, false, false, false, false, false, false, false, false, false, false, false, false, false, false, false, false, false, false, false, false, false, false, false, false, false, false, false, false, false, false, false, false, false, false, false, false, false, false, false, false, false, false, false, false, false, false, false, false, false, false, false, false, false, false, false], [false, false, true, false, false, false, false, true, false, false, false, false, false, false, false, false, false, false, false, false, false, false, false, false, false, false, false, false, true, false, true, false, false, true, true, true, true, false, true, true, true, false, false, false, false, false, false, true, false, false, false, false, true, true, true, true, false, false, true, true, true, true, true, true, false, true, false, false, false, false, false, false, true, false, false, false, false, false, false, false, false, true, false, false, false, false, false, false, true, true, false, false, false, true, false, false, false, false, false, false, false, true, false, false, true, false, false, false, false, false, false, false, false, true, false, false, false, false, false, false, true, true, false, false, false, false, false, false, false, false, false, false, false, false, false, false, false, false, false, false, false, false, false, false, false, false, false, false, false, false, false, false, true, false, false, false, false, false, false, true, false, false, false, true, true, false, false, false, false, false, false, false, false, false, false, false, false, false, false, true, false, true, false, false, false, false, false, false, false, false, false, true, false, false, false, false, true, true, false, false, false, false, false, true, false, true, true, false, true, false, false, true, false, false, false, false, true, false, true, false, false, false, false, false, false, true, true, true, false, false, false, false, true, false, false, true, false, false, false, false, true, false, true, true, false, false, false, false, false, true, false, false, false, false, true, false, false, false, false, true, true, false, false, false, false, false, true, false, false, false, true, false, false, false, false, false, false, true, true, true, false, false, false, false, false, false, false, false, false, false, false, false, false, false, false, false, false, false, false, false, false, true, false, false, false, true, false, false, false, false, false, true, true, false, true, false, true, true, false, true, false, false, false, false, false, false, false, false, false, false, true, true, false, false, true, true, false, true, true, false, false, false, false, true, false, false, true, false, false, true, true, false, false, true, false, false, false, false, true, true, true, false, false, false, false, false, true, true, false, true, false, true, false, false, false, false, false, true, false, false, false, true, true, false, false, false, false, true, false, false, false, true, false, false, false, false, true, true, false, true, false, false, false, false, false, false, false, true, false, false, true, false, true, false, true, false, false, false, true, true, true, false, true, false, true, false, true, true, false, false, false, false, true, false, true, false, true, false, false, false, false, false, false, false, false, false, true, false, false, false, false, false, false, false, false, false, false, false, false, false, false, false, false, true, false, false, false, false, false, false, false, false, false, false, false, false, false, false, false, false, false, false, false, false, false, false, false, false, false, false, false, false, false, false, false, false, false, false, false, false, false, false, false, false, false, false, false, false, false, false, false, false, false, false, false, false, false, false, false, false], [false, false, true, false, false, false, false, true, false, false, false, false, false, false, false, false, false, false, false, false, false, false, false, false, false, false, false, false, true, false, true, false, false, true, true, true, true, false, true, true, true, false, false, false, false, false, false, true, false, false, false, false, true, true, true, true, false, false, true, true, true, true, true, true, false, true, false, false, false, false, false, false, true, false, false, false, false, false, false, false, false, true, false, false, false, false, false, false, true, true, false, false, false, true, false, false, false, false, false, false, false, true, false, false, true, false, false, false, false, false, false, false, false, true, false, false, false, false, false, false, true, true, false, false, false, false, false, false, false, false, false, false, false, false, false, false, false, false, false, false, false, false, false, false, false, false, false, false, false, false, false, false, true, false, false, false, false, false, false, true, false, false, false, true, true, false, false, false, false, false, false, false, false, false, false, false, false, false, false, true, false, true, false, false, false, false, false, false, false, false, false, true, false, false, false, false, true, true, false, false, false, false, false, true, false, true, true, false, true, false, false, true, false, false, false, false, true, false, true, false, false, false, false, false, false, true, true, true, false, false, false, false, true, false, false, true, false, false, false, false, true, false, true, true, false, false, false, false, false, true, false, false, false, false, true, false, false, false, false, true, true, false, false, false, false, false, true, false, false, false, true, false, false, false, false, false, false, true, true, true, false, false, false, false, false, false, false, false, false, false, false, false, false, false, false, false, false, false, false, false, false, true, false, false, false, true, false, false, false, false, false, true, true, false, true, false, true, true, false, true, false, false, false, false, false, false, false, false, false, false, true, true, false, false, true, true, false, true, true, false, false, false, false, true, false, false, true, false, false, true, true, false, false, true, false, false, false, false, true, true, true, false, false, false, false, false, true, true, false, true, false, true, false, false, false, false, false, true, false, false, false, true, true, false, false, false, false, true, false, false, false, true, false, false, false, false, true, true, false, true, false, false, false, false, false, false, false, true, false, false, true, false, true, false, true, false, false, false, true, true, true, false, true, false, true, false, true, true, false, false, false, false, true, false, true, false, true, false, false, false, false, false, false, false, false, false, true, false, false, false, false, false, false, false, false, false, false, false, false, false, false, false, false, true, false, false, false, false, false, false, false, false, false, false, false, false, false, false, false, false, false, false, false, false, false, false, false, false, false, false, false, false, false, false, false, false, false, false, false, false, false, false, false, false, false, false, false, false, false, false, false, false, false, false, false, false, false, false, false, false], [false, false, true, false, false, false, false, true, false, false, false, false, false, false, false, false, false, false, false, false, false, false, false, false, false, false, false, false, true, false, true, false, false, true, true, true, true, false, true, true, true, false, false, false, false, false, false, true, false, false, false, false, true, true, true, true, false, false, true, true, true, true, true, true, false, true, false, false, false, false, false, false, true, false, false, false, false, false, false, false, false, true, false, false, false, false, false, false, true, true, false, false, false, true, false, false, false, false, false, false, false, true, false, false, true, false, false, false, false, false, false, false, false, true, false, false, false, false, false, false, true, true, false, false, false, false, false, false, false, false, false, false, false, false, false, false, false, false, false, false, false, false, false, false, false, false, false, false, false, false, false, false, true, false, false, false, false, false, false, true, false, false, false, true, true, false, false, false, false, false, false, false, false, false, false, false, false, false, false, true, false, true, false, false, false, false, false, false, false, false, false, true, false, false, false, false, true, true, false, false, false, false, false, true, false, true, true, false, true, false, false, true, false, false, false, false, true, false, true, false, false, false, false, false, false, true, true, true, false, false, false, false, true, false, false, true, false, false, false, false, true, false, true, true, false, false, false, false, false, true, false, false, false, false, true, false, false, false, false, true, true, false, false, false, false, false, true, false, false, false, true, false, false, false, false, false, false, true, true, true, false, false, false, false, false, false, false, false, false, false, false, false, false, false, false, false, false, false, false, false, false, true, false, false, false, true, false, false, false, false, false, true, true, false, true, false, true, true, false, true, false, false, false, false, false, false, false, false, false, false, true, true, false, false, true, true, false, true, true, false, false, false, false, true, false, false, true, false, false, true, true, false, false, true, false, false, false, false, true, true, true, false, false, false, false, false, true, true, false, true, false, true, false, false, false, false, false, true, false, false, false, true, true, false, false, false, false, true, false, false, false, true, false, false, false, false, true, true, false, true, false, false, false, false, false, false, false, true, false, false, true, false, true, false, true, false, false, false, true, true, true, false, true, false, true, false, true, true, false, false, false, false, true, false, true, false, true, false, false, false, false, false, false, false, false, false, true, false, false, false, false, false, false, false, false, false, false, false, false, false, false, false, false, true, false, false, false, false, false, false, false, false, false, false, false, false, false, false, false, false, false, false, false, false, false, false, false, false, false, false, false, false, false, false, false, false, false, false, false, false, false, false, false, false, false, false, false, false, false, false, false, false, false, false, false, false, false, false, false, false], [false, false, true, false, false, false, false, true, false, false, false, false, false, false, false, false, false, false, false, false, false, false, false, false, false, false, false, false, true, false, true, false, false, true, true, true, true, false, true, true, true, false, false, false, false, false, false, true, false, false, false, false, true, true, true, true, false, false, true, true, true, true, true, true, false, true, false, false, false, false, false, false, true, false, false, false, false, false, false, false, false, true, false, false, false, false, false, false, true, true, false, false, false, true, false, false, false, false, false, false, false, true, false, false, true, false, false, false, false, false, false, false, false, true, false, false, false, false, false, false, true, true, false, false, false, false, false, false, false, false, false, false, false, false, false, false, false, false, false, false, false, false, false, false, false, false, false, false, false, false, false, false, true, false, false, false, false, false, false, true, false, false, false, true, true, false, false, false, false, false, false, false, false, false, false, false, false, false, false, true, false, true, false, false, false, false, false, false, false, false, false, true, false, false, false, false, true, true, false, false, false, false, false, true, false, true, true, false, true, false, false, true, false, false, false, false, true, false, true, false, false, false, false, false, false, true, true, true, false, false, false, false, true, false, false, true, false, false, false, false, true, false, true, true, false, false, false, false, false, true, false, false, false, false, true, false, false, false, false, true, true, false, false, false, false, false, true, false, false, false, true, false, false, false, false, false, false, true, true, true, false, false, false, false, false, false, false, false, false, false, false, false, false, false, false, false, false, false, false, false, false, true, false, false, false, true, false, false, false, false, false, true, true, false, true, false, true, true, false, true, false, false, false, false, false, false, false, false, false, false, true, true, false, false, true, true, false, true, true, false, false, false, false, true, false, false, true, false, false, true, true, false, false, true, false, false, false, false, true, true, true, false, false, false, false, false, true, true, false, true, false, true, false, false, false, false, false, true, false, false, false, true, true, false, false, false, false, true, false, false, false, true, false, false, false, false, true, true, false, true, false, false, false, false, false, false, false, true, false, false, true, false, true, false, true, false, false, false, true, true, true, false, true, false, true, false, true, true, false, false, false, false, true, false, true, false, true, false, false, false, false, false, false, false, false, false, true, false, false, false, false, false, false, false, false, false, false, false, false, false, false, false, false, true, false, false, false, false, false, false, false, false, false, false, false, false, false, false, false, false, false, false, false, false, false, false, false, false, false, false, false, false, false, false, false, false, false, false, false, false, false, false, false, false, false, false, false, false, false, false, false, false, false, false, false, false, false, false, false, false], [false, false, true, false, false, false, false, true, false, false, false, false, false, false, false, false, false, false, false, false, false, false, false, false, false, false, false, false, true, false, true, false, false, true, true, true, true, false, true, true, true, false, false, false, false, false, false, true, false, false, false, false, true, true, true, true, false, false, true, true, true, true, true, true, false, true, false, false, false, false, false, false, true, false, false, false, false, false, false, false, false, true, false, false, false, false, false, false, true, true, false, false, false, true, false, false, false, false, false, false, false, true, false, false, true, false, false, false, false, false, false, false, false, true, false, false, false, false, false, false, true, true, false, false, false, false, false, false, false, false, false, false, false, false, false, false, false, false, false, false, false, false, false, false, false, false, false, false, false, false, false, false, true, false, false, false, false, false, false, true, false, false, false, true, true, false, false, false, false, false, false, false, false, false, false, false, false, false, false, true, false, true, false, false, false, false, false, false, false, false, false, true, false, false, false, false, true, true, false, false, false, false, false, true, false, true, true, false, true, false, false, true, false, false, false, false, true, false, true, false, false, false, false, false, false, true, true, true, false, false, false, false, true, false, false, true, false, false, false, false, true, false, true, true, false, false, false, false, false, true, false, false, false, false, true, false, false, false, false, true, true, false, false, false, false, false, true, false, false, false, true, false, false, false, false, false, false, true, true, true, false, false, false, false, false, false, false, false, false, false, false, false, false, false, false, false, false, false, false, false, false, true, false, false, false, true, false, false, false, false, false, true, true, false, true, false, true, true, false, true, false, false, false, false, false, false, false, false, false, false, true, true, false, false, true, true, false, true, true, false, false, false, false, true, false, false, true, false, false, true, true, false, false, true, false, false, false, false, true, true, true, false, false, false, false, false, true, true, false, true, false, true, false, false, false, false, false, true, false, false, false, true, true, false, false, false, false, true, false, false, false, true, false, false, false, false, true, true, false, true, false, false, false, false, false, false, false, true, false, false, true, false, true, false, true, false, false, false, true, true, true, false, true, false, true, false, true, true, false, false, false, false, true, false, true, false, true, false, false, false, false, false, false, false, false, false, true, false, false, false, false, false, false, false, false, false, false, false, false, false, false, false, false, true, false, false, false, false, false, false, false, false, false, false, false, false, false, false, false, false, false, false, false, false, false, false, false, false, false, false, false, false, false, false, false, false, false, false, false, false, false, false, false, false, false, false, false, false, false, false, false, false, false, false, false, false, false, false, false, false], [false, false, true, false, false, false, false, true, false, false, false, false, false, false, false, false, false, false, false, false, false, false, false, false, false, false, false, false, true, false, true, false, false, true, true, true, true, false, true, true, true, false, false, false, false, false, false, true, false, false, false, false, true, true, true, true, false, false, true, true, true, true, true, true, false, true, false, false, false, false, false, false, true, false, false, false, false, false, false, false, false, true, false, false, false, false, false, false, true, true, false, false, false, true, false, false, false, false, false, false, false, true, false, false, true, false, false, false, false, false, false, false, false, true, false, false, false, false, false, false, true, true, false, false, false, false, false, false, false, false, false, false, false, false, false, false, false, false, false, false, false, false, false, false, false, false, false, false, false, false, false, false, true, false, false, false, false, false, false, true, false, false, false, true, true, false, false, false, false, false, false, false, false, false, false, false, false, false, false, true, false, true, false, false, false, false, false, false, false, false, false, true, false, false, false, false, true, true, false, false, false, false, false, true, false, true, true, false, true, false, false, true, false, false, false, false, true, false, true, false, false, false, false, false, false, true, true, true, false, false, false, false, true, false, false, true, false, false, false, false, true, false, true, true, false, false, false, false, false, true, false, false, false, false, true, false, false, false, false, true, true, false, false, false, false, false, true, false, false, false, true, false, false, false, false, false, false, true, true, true, false, false, false, false, false, false, false, false, false, false, false, false, false, false, false, false, false, false, false, false, false, true, false, false, false, true, false, false, false, false, false, true, true, false, true, false, true, true, false, true, false, false, false, false, false, false, false, false, false, false, true, true, false, false, true, true, false, true, true, false, false, false, false, true, false, false, true, false, false, true, true, false, false, true, false, false, false, false, true, true, true, false, false, false, false, false, true, true, false, true, false, true, false, false, false, false, false, true, false, false, false, true, true, false, false, false, false, true, false, false, false, true, false, false, false, false, true, true, false, true, false, false, false, false, false, false, false, true, false, false, true, false, true, false, true, false, false, false, true, true, true, false, true, false, true, false, true, true, false, false, false, false, true, false, true, false, true, false, false, false, false, false, false, false, false, false, true, false, false, false, false, false, false, false, false, false, false, false, false, false, false, false, false, true, false, false, false, false, false, false, false, false, false, false, false, false, false, false, false, false, false, false, false, false, false, false, false, false, false, false, false, false, false, false, false, false, false, false, false, false, false, false, false, false, false, false, false, false, false, false, false, false, false, false, false, false, false, false, false, false], [false, false, true, false, false, false, false, true, false, false, false, false, false, false, false, false, false, false, false, false, false, false, false, false, false, false, false, false, true, false, true, false, false, true, true, true, true, false, true, true, true, false, false, false, false, false, false, true, false, false, false, false, true, true, true, true, false, false, true, true, true, true, true, true, false, true, false, false, false, false, false, false, true, false, false, false, false, false, false, false, false, true, false, false, false, false, false, false, true, true, false, false, false, true, false, false, false, false, false, false, false, true, false, false, true, false, false, false, false, false, false, false, false, true, false, false, false, false, false, false, true, true, false, false, false, false, false, false, false, false, false, false, false, false, false, false, false, false, false, false, false, false, false, false, false, false, false, false, false, false, false, false, true, false, false, false, false, false, false, true, false, false, false, true, true, false, false, false, false, false, false, false, false, false, false, false, false, false, false, true, false, true, false, false, false, false, false, false, false, false, false, true, false, false, false, false, true, true, false, false, false, false, false, true, false, true, true, false, true, false, false, true, false, false, false, false, true, false, true, false, false, false, false, false, false, true, true, true, false, false, false, false, true, false, false, true, false, false, false, false, true, false, true, true, false, false, false, false, false, true, false, false, false, false, true, false, false, false, false, true, true, false, false, false, false, false, true, false, false, false, true, false, false, false, false, false, false, true, true, true, false, false, false, false, false, false, false, false, false, false, false, false, false, false, false, false, false, false, false, false, false, true, false, false, false, true, false, false, false, false, false, true, true, false, true, false, true, true, false, true, false, false, false, false, false, false, false, false, false, false, true, true, false, false, true, true, false, true, true, false, false, false, false, true, false, false, true, false, false, true, true, false, false, true, false, false, false, false, true, true, true, false, false, false, false, false, true, true, false, true, false, true, false, false, false, false, false, true, false, false, false, true, true, false, false, false, false, true, false, false, false, true, false, false, false, false, true, true, false, true, false, false, false, false, false, false, false, true, false, false, true, false, true, false, true, false, false, false, true, true, true, false, true, false, true, false, true, true, false, false, false, false, true, false, true, false, true, false, false, false, false, false, false, false, false, false, true, false, false, false, false, false, false, false, false, false, false, false, false, false, false, false, false, true, false, false, false, false, false, false, false, false, false, false, false, false, false, false, false, false, false, false, false, false, false, false, false, false, false, false, false, false, false, false, false, false, false, false, false, false, false, false, false, false, false, false, false, false, false, false, false, false, false, false, false, false, false, false, false, false], [false, false, true, false, false, false, false, true, false, false, false, false, false, false, false, false, false, false, false, false, false, false, false, false, false, false, false, false, true, false, true, false, false, true, true, true, true, false, true, true, true, false, false, false, false, false, false, true, false, false, false, false, true, true, true, true, false, false, true, true, true, true, true, true, false, true, false, false, false, false, false, false, true, false, false, false, false, false, false, false, false, true, false, false, false, false, false, false, true, true, false, false, false, true, false, false, false, false, false, false, false, true, false, false, true, false, false, false, false, false, false, false, false, true, false, false, false, false, false, false, true, true, false, false, false, false, false, false, false, false, false, false, false, false, false, false, false, false, false, false, false, false, false, false, false, false, false, false, false, false, false, false, true, false, false, false, false, false, false, true, false, false, false, true, true, false, false, false, false, false, false, false, false, false, false, false, false, false, false, true, false, true, false, false, false, false, false, false, false, false, false, true, false, false, false, false, true, true, false, false, false, false, false, true, false, true, true, false, true, false, false, true, false, false, false, false, true, false, true, false, false, false, false, false, false, true, true, true, false, false, false, false, true, false, false, true, false, false, false, false, true, false, true, true, false, false, false, false, false, true, false, false, false, false, true, false, false, false, false, true, true, false, false, false, false, false, true, false, false, false, true, false, false, false, false, false, false, true, true, true, false, false, false, false, false, false, false, false, false, false, false, false, false, false, false, false, false, false, false, false, false, true, false, false, false, true, false, false, false, false, false, true, true, false, true, false, true, true, false, true, false, false, false, false, false, false, false, false, false, false, true, true, false, false, true, true, false, true, true, false, false, false, false, true, false, false, true, false, false, true, true, false, false, true, false, false, false, false, true, true, true, false, false, false, false, false, true, true, false, true, false, true, false, false, false, false, false, true, false, false, false, true, true, false, false, false, false, true, false, false, false, true, false, false, false, false, true, true, false, true, false, false, false, false, false, false, false, true, false, false, true, false, true, false, true, false, false, false, true, true, true, false, true, false, true, false, true, true, false, false, false, false, true, false, true, false, true, false, false, false, false, false, false, false, false, false, true, false, false, false, false, false, false, false, false, false, false, false, false, false, false, false, false, true, false, false, false, false, false, false, false, false, false, false, false, false, false, false, false, false, false, false, false, false, false, false, false, false, false, false, false, false, false, false, false, false, false, false, false, false, false, false, false, false, false, false, false, false, false, false, false, false, false, false, false, false, false, false, false, false], [false, false, true, false, false, false, false, true, false, false, false, false, false, false, false, false, false, false, false, false, false, false, false, false, false, false, false, false, true, false, true, false, false, true, true, true, true, false, true, true, true, false, false, false, false, false, false, true, false, false, false, false, true, true, true, true, false, false, true, true, true, true, true, true, false, true, false, false, false, false, false, false, true, false, false, false, false, false, false, false, false, true, false, false, false, false, false, false, true, true, false, false, false, true, false, false, false, false, false, false, false, true, false, false, true, false, false, false, false, false, false, false, false, true, false, false, false, false, false, false, true, true, false, false, false, false, false, false, false, false, false, false, false, false, false, false, false, false, false, false, false, false, false, false, false, false, false, false, false, false, false, false, true, false, false, false, false, false, false, true, false, false, false, true, true, false, false, false, false, false, false, false, false, false, false, false, false, false, false, true, false, true, false, false, false, false, false, false, false, false, false, true, false, false, false, false, true, true, false, false, false, false, false, true, false, true, true, false, true, false, false, true, false, false, false, false, true, false, true, false, false, false, false, false, false, true, true, true, false, false, false, false, true, false, false, true, false, false, false, false, true, false, true, true, false, false, false, false, false, true, false, false, false, false, true, false, false, false, false, true, true, false, false, false, false, false, true, false, false, false, true, false, false, false, false, false, false, true, true, true, false, false, false, false, false, false, false, false, false, false, false, false, false, false, false, false, false, false, false, false, false, true, false, false, false, true, false, false, false, false, false, true, true, false, true, false, true, true, false, true, false, false, false, false, false, false, false, false, false, false, true, true, false, false, true, true, false, true, true, false, false, false, false, true, false, false, true, false, false, true, true, false, false, true, false, false, false, false, true, true, true, false, false, false, false, false, true, true, false, true, false, true, false, false, false, false, false, true, false, false, false, true, true, false, false, false, false, true, false, false, false, true, false, false, false, false, true, true, false, true, false, false, false, false, false, false, false, true, false, false, true, false, true, false, true, false, false, false, true, true, true, false, true, false, true, false, true, true, false, false, false, false, true, false, true, false, true, false, false, false, false, false, false, false, false, false, true, false, false, false, false, false, false, false, false, false, false, false, false, false, false, false, false, true, false, false, false, false, false, false, false, false, false, false, false, false, false, false, false, false, false, false, false, false, false, false, false, false, false, false, false, false, false, false, false, false, false, false, false, false, false, false, false, false, false, false, false, false, false, false, false, false, false, false, false, false, false, false, false, false], [false, false, true, false, false, false, false, true, false, false, false, false, false, false, false, false, false, false, false, false, false, false, false, false, false, false, false, false, true, false, true, false, false, true, true, true, true, false, true, true, true, false, false, false, false, false, false, true, false, false, false, false, true, true, true, true, false, false, true, true, true, true, true, true, false, true, false, false, false, false, false, false, true, false, false, false, false, false, false, false, false, true, false, false, false, false, false, false, true, true, false, false, false, true, false, false, false, false, false, false, false, true, false, false, true, false, false, false, false, false, false, false, false, true, false, false, false, false, false, false, true, true, false, false, false, false, false, false, false, false, false, false, false, false, false, false, false, false, false, false, false, false, false, false, false, false, false, false, false, false, false, false, true, false, false, false, false, false, false, true, false, false, false, true, true, false, false, false, false, false, false, false, false, false, false, false, false, false, false, true, false, true, false, false, false, false, false, false, false, false, false, true, false, false, false, false, true, true, false, false, false, false, false, true, false, true, true, false, true, false, false, true, false, false, false, false, true, false, true, false, false, false, false, false, false, true, true, true, false, false, false, false, true, false, false, true, false, false, false, false, true, false, true, true, false, false, false, false, false, true, false, false, false, false, true, false, false, false, false, true, true, false, false, false, false, false, true, false, false, false, true, false, false, false, false, false, false, true, true, true, false, false, false, false, false, false, false, false, false, false, false, false, false, false, false, false, false, false, false, false, false, true, false, false, false, true, false, false, false, false, false, true, true, false, true, false, true, true, false, true, false, false, false, false, false, false, false, false, false, false, true, true, false, false, true, true, false, true, true, false, false, false, false, true, false, false, true, false, false, true, true, false, false, true, false, false, false, false, true, true, true, false, false, false, false, false, true, true, false, true, false, true, false, false, false, false, false, true, false, false, false, true, true, false, false, false, false, true, false, false, false, true, false, false, false, false, true, true, false, true, false, false, false, false, false, false, false, true, false, false, true, false, true, false, true, false, false, false, true, true, true, false, true, false, true, false, true, true, false, false, false, false, true, false, true, false, true, false, false, false, false, false, false, false, false, false, true, false, false, false, false, false, false, false, false, false, false, false, false, false, false, false, false, true, false, false, false, false, false, false, false, false, false, false, false, false, false, false, false, false, false, false, false, false, false, false, false, false, false, false, false, false, false, false, false, false, false, false, false, false, false, false, false, false, false, false, false, false, false, false, false, false, false, false, false, false, false, false, false, false], [false, false, true, false, false, false, false, true, false, false, false, false, false, false, false, false, false, false, false, false, false, false, false, false, false, false, false, false, true, false, true, false, false, true, true, true, true, false, true, true, true, false, false, false, false, false, false, true, false, false, false, false, true, true, true, true, false, false, true, true, true, true, true, true, false, true, false, false, false, false, false, false, true, false, false, false, false, false, false, false, false, true, false, false, false, false, false, false, true, true, false, false, false, true, false, false, false, false, false, false, false, true, false, false, true, false, false, false, false, false, false, false, false, true, false, false, false, false, false, false, true, true, false, false, false, false, false, false, false, false, false, false, false, false, false, false, false, false, false, false, false, false, false, false, false, false, false, false, false, false, false, false, true, false, false, false, false, false, false, true, false, false, false, true, true, false, false, false, false, false, false, false, false, false, false, false, false, false, false, true, false, true, false, false, false, false, false, false, false, false, false, true, false, false, false, false, true, true, false, false, false, false, false, true, false, true, true, false, true, false, false, true, false, false, false, false, true, false, true, false, false, false, false, false, false, true, true, true, false, false, false, false, true, false, false, true, false, false, false, false, true, false, true, true, false, false, false, false, false, true, false, false, false, false, true, false, false, false, false, true, true, false, false, false, false, false, true, false, false, false, true, false, false, false, false, false, false, true, true, true, false, false, false, false, false, false, false, false, false, false, false, false, false, false, false, false, false, false, false, false, false, true, false, false, false, true, false, false, false, false, false, true, true, false, true, false, true, true, false, true, false, false, false, false, false, false, false, false, false, false, true, true, false, false, true, true, false, true, true, false, false, false, false, true, false, false, true, false, false, true, true, false, false, true, false, false, false, false, true, true, true, false, false, false, false, false, true, true, false, true, false, true, false, false, false, false, false, true, false, false, false, true, true, false, false, false, false, true, false, false, false, true, false, false, false, false, true, true, false, true, false, false, false, false, false, false, false, true, false, false, true, false, true, false, true, false, false, false, true, true, true, false, true, false, true, false, true, true, false, false, false, false, true, false, true, false, true, false, false, false, false, false, false, false, false, false, true, false, false, false, false, false, false, false, false, false, false, false, false, false, false, false, false, true, false, false, false, false, false, false, false, false, false, false, false, false, false, false, false, false, false, false, false, false, false, false, false, false, false, false, false, false, false, false, false, false, false, false, false, false, false, false, false, false, false, false, false, false, false, false, false, false, false, false, false, false, false, false, false, false], [false, false, true, false, false, false, false, true, false, false, false, false, false, false, false, false, false, false, false, false, false, false, false, false, false, false, false, false, true, false, true, false, false, true, true, true, true, false, true, true, true, false, false, false, false, false, false, true, false, false, false, false, true, true, true, true, false, false, true, true, true, true, true, true, false, true, false, false, false, false, false, false, true, false, false, false, false, false, false, false, false, true, false, false, false, false, false, false, true, true, false, false, false, true, false, false, false, false, false, false, false, true, false, false, true, false, false, false, false, false, false, false, false, true, false, false, false, false, false, false, true, true, false, false, false, false, false, false, false, false, false, false, false, false, false, false, false, false, false, false, false, false, false, false, false, false, false, false, false, false, false, false, true, false, false, false, false, false, false, true, false, false, false, true, true, false, false, false, false, false, false, false, false, false, false, false, false, false, false, true, false, true, false, false, false, false, false, false, false, false, false, true, false, false, false, false, true, true, false, false, false, false, false, true, false, true, true, false, true, false, false, true, false, false, false, false, true, false, true, false, false, false, false, false, false, true, true, true, false, false, false, false, true, false, false, true, false, false, false, false, true, false, true, true, false, false, false, false, false, true, false, false, false, false, true, false, false, false, false, true, true, false, false, false, false, false, true, false, false, false, true, false, false, false, false, false, false, true, true, true, false, false, false, false, false, false, false, false, false, false, false, false, false, false, false, false, false, false, false, false, false, true, false, false, false, true, false, false, false, false, false, true, true, false, true, false, true, true, false, true, false, false, false, false, false, false, false, false, false, false, true, true, false, false, true, true, false, true, true, false, false, false, false, true, false, false, true, false, false, true, true, false, false, true, false, false, false, false, true, true, true, false, false, false, false, false, true, true, false, true, false, true, false, false, false, false, false, true, false, false, false, true, true, false, false, false, false, true, false, false, false, true, false, false, false, false, true, true, false, true, false, false, false, false, false, false, false, true, false, false, true, false, true, false, true, false, false, false, true, true, true, false, true, false, true, false, true, true, false, false, false, false, true, false, true, false, true, false, false, false, false, false, false, false, false, false, true, false, false, false, false, false, false, false, false, false, false, false, false, false, false, false, false, true, false, false, false, false, false, false, false, false, false, false, false, false, false, false, false, false, false, false, false, false, false, false, false, false, false, false, false, false, false, false, false, false, false, false, false, false, false, false, false, false, false, false, false, false, false, false, false, false, false, false, false, false, false, false, false, false], [false, false, true, false, false, false, false, true, false, false, false, false, false, false, false, false, false, false, false, false, false, false, false, false, false, false, false, false, true, false, true, false, false, true, true, true, true, false, true, true, true, false, false, false, false, false, false, true, false, false, false, false, true, true, true, true, false, false, true, true, true, true, true, true, false, true, false, false, false, false, false, false, true, false, false, false, false, false, false, false, false, true, false, false, false, false, false, false, true, true, false, false, false, true, false, false, false, false, false, false, false, true, false, false, true, false, false, false, false, false, false, false, false, true, false, false, false, false, false, false, true, true, false, false, false, false, false, false, false, false, false, false, false, false, false, false, false, false, false, false, false, false, false, false, false, false, false, false, false, false, false, false, true, false, false, false, false, false, false, true, false, false, false, true, true, false, false, false, false, false, false, false, false, false, false, false, false, false, false, true, false, true, false, false, false, false, false, false, false, false, false, true, false, false, false, false, true, true, false, false, false, false, false, true, false, true, true, false, true, false, false, true, false, false, false, false, true, false, true, false, false, false, false, false, false, true, true, true, false, false, false, false, true, false, false, true, false, false, false, false, true, false, true, true, false, false, false, false, false, true, false, false, false, false, true, false, false, false, false, true, true, false, false, false, false, false, true, false, false, false, true, false, false, false, false, false, false, true, true, true, false, false, false, false, false, false, false, false, false, false, false, false, false, false, false, false, false, false, false, false, false, true, false, false, false, true, false, false, false, false, false, true, true, false, true, false, true, true, false, true, false, false, false, false, false, false, false, false, false, false, true, true, false, false, true, true, false, true, true, false, false, false, false, true, false, false, true, false, false, true, true, false, false, true, false, false, false, false, true, true, true, false, false, false, false, false, true, true, false, true, false, true, false, false, false, false, false, true, false, false, false, true, true, false, false, false, false, true, false, false, false, true, false, false, false, false, true, true, false, true, false, false, false, false, false, false, false, true, false, false, true, false, true, false, true, false, false, false, true, true, true, false, true, false, true, false, true, true, false, false, false, false, true, false, true, false, true, false, false, false, false, false, false, false, false, false, true, false, false, false, false, false, false, false, false, false, false, false, false, false, false, false, false, true, false, false, false, false, false, false, false, false, false, false, false, false, false, false, false, false, false, false, false, false, false, false, false, false, false, false, false, false, false, false, false, false, false, false, false, false, false, false, false, false, false, false, false, false, false, false, false, false, false, false, false, false, false, false, false, false], [false, false, true, false, false, false, false, true, false, false, false, false, false, false, false, false, false, false, false, false, false, false, false, false, false, false, false, false, true, false, true, false, false, true, true, true, true, false, true, true, true, false, false, false, false, false, false, true, false, false, false, false, true, true, true, true, false, false, true, true, true, true, true, true, false, true, false, false, false, false, false, false, true, false, false, false, false, false, false, false, false, true, false, false, false, false, false, false, true, true, false, false, false, true, false, false, false, false, false, false, false, true, false, false, true, false, false, false, false, false, false, false, false, true, false, false, false, false, false, false, true, true, false, false, false, false, false, false, false, false, false, false, false, false, false, false, false, false, false, false, false, false, false, false, false, false, false, false, false, false, false, false, true, false, false, false, false, false, false, true, false, false, false, true, true, false, false, false, false, false, false, false, false, false, false, false, false, false, false, true, false, true, false, false, false, false, false, false, false, false, false, true, false, false, false, false, true, true, false, false, false, false, false, true, false, true, true, false, true, false, false, true, false, false, false, false, true, false, true, false, false, false, false, false, false, true, true, true, false, false, false, false, true, false, false, true, false, false, false, false, true, false, true, true, false, false, false, false, false, true, false, false, false, false, true, false, false, false, false, true, true, false, false, false, false, false, true, false, false, false, true, false, false, false, false, false, false, true, true, true, false, false, false, false, false, false, false, false, false, false, false, false, false, false, false, false, false, false, false, false, false, true, false, false, false, true, false, false, false, false, false, true, true, false, true, false, true, true, false, true, false, false, false, false, false, false, false, false, false, false, true, true, false, false, true, true, false, true, true, false, false, false, false, true, false, false, true, false, false, true, true, false, false, true, false, false, false, false, true, true, true, false, false, false, false, false, true, true, false, true, false, true, false, false, false, false, false, true, false, false, false, true, true, false, false, false, false, true, false, false, false, true, false, false, false, false, true, true, false, true, false, false, false, false, false, false, false, true, false, false, true, false, true, false, true, false, false, false, true, true, true, false, true, false, true, false, true, true, false, false, false, false, true, false, true, false, true, false, false, false, false, false, false, false, false, false, true, false, false, false, false, false, false, false, false, false, false, false, false, false, false, false, false, true, false, false, false, false, false, false, false, false, false, false, false, false, false, false, false, false, false, false, false, false, false, false, false, false, false, false, false, false, false, false, false, false, false, false, false, false, false, false, false, false, false, false, false, false, false, false, false, false, false, false, false, false, false, false, false, false], [false, false, true, false, false, false, false, true, false, false, false, false, false, false, false, false, false, false, false, false, false, false, false, false, false, false, false, false, true, false, true, false, false, true, true, true, true, false, true, true, true, false, false, false, false, false, false, true, false, false, false, false, true, true, true, true, false, false, true, true, true, true, true, true, false, true, false, false, false, false, false, false, true, false, false, false, false, false, false, false, false, true, false, false, false, false, false, false, true, true, false, false, false, true, false, false, false, false, false, false, false, true, false, false, true, false, false, false, false, false, false, false, false, true, false, false, false, false, false, false, true, true, false, false, false, false, false, false, false, false, false, false, false, false, false, false, false, false, false, false, false, false, false, false, false, false, false, false, false, false, false, false, true, false, false, false, false, false, false, true, false, false, false, true, true, false, false, false, false, false, false, false, false, false, false, false, false, false, false, true, false, true, false, false, false, false, false, false, false, false, false, true, false, false, false, false, true, true, false, false, false, false, false, true, false, true, true, false, true, false, false, true, false, false, false, false, true, false, true, false, false, false, false, false, false, true, true, true, false, false, false, false, true, false, false, true, false, false, false, false, true, false, true, true, false, false, false, false, false, true, false, false, false, false, true, false, false, false, false, true, true, false, false, false, false, false, true, false, false, false, true, false, false, false, false, false, false, true, true, true, false, false, false, false, false, false, false, false, false, false, false, false, false, false, false, false, false, false, false, false, false, true, false, false, false, true, false, false, false, false, false, true, true, false, true, false, true, true, false, true, false, false, false, false, false, false, false, false, false, false, true, true, false, false, true, true, false, true, true, false, false, false, false, true, false, false, true, false, false, true, true, false, false, true, false, false, false, false, true, true, true, false, false, false, false, false, true, true, false, true, false, true, false, false, false, false, false, true, false, false, false, true, true, false, false, false, false, true, false, false, false, true, false, false, false, false, true, true, false, true, false, false, false, false, false, false, false, true, false, false, true, false, true, false, true, false, false, false, true, true, true, false, true, false, true, false, true, true, false, false, false, false, true, false, true, false, true, false, false, false, false, false, false, false, false, false, true, false, false, false, false, false, false, false, false, false, false, false, false, false, false, false, false, true, false, false, false, false, false, false, false, false, false, false, false, false, false, false, false, false, false, false, false, false, false, false, false, false, false, false, false, false, false, false, false, false, false, false, false, false, false, false, false, false, false, false, false, false, false, false, false, false, false, false, false, false, false, false, false, false], [false, false, true, false, false, false, false, true, false, false, false, false, false, false, false, false, false, false, false, false, false, false, false, false, false, false, false, false, true, false, true, false, false, true, true, true, true, false, true, true, true, false, false, false, false, false, false, true, false, false, false, false, true, true, true, true, false, false, true, true, true, true, true, true, false, true, false, false, false, false, false, false, true, false, false, false, false, false, false, false, false, true, false, false, false, false, false, false, true, true, false, false, false, true, false, false, false, false, false, false, false, true, false, false, true, false, false, false, false, false, false, false, false, true, false, false, false, false, false, false, true, true, false, false, false, false, false, false, false, false, false, false, false, false, false, false, false, false, false, false, false, false, false, false, false, false, false, false, false, false, false, false, true, false, false, false, false, false, false, true, false, false, false, true, true, false, false, false, false, false, false, false, false, false, false, false, false, false, false, true, false, true, false, false, false, false, false, false, false, false, false, true, false, false, false, false, true, true, false, false, false, false, false, true, false, true, true, false, true, false, false, true, false, false, false, false, true, false, true, false, false, false, false, false, false, true, true, true, false, false, false, false, true, false, false, true, false, false, false, false, true, false, true, true, false, false, false, false, false, true, false, false, false, false, true, false, false, false, false, true, true, false, false, false, false, false, true, false, false, false, true, false, false, false, false, false, false, true, true, true, false, false, false, false, false, false, false, false, false, false, false, false, false, false, false, false, false, false, false, false, false, true, false, false, false, true, false, false, false, false, false, true, true, false, true, false, true, true, false, true, false, false, false, false, false, false, false, false, false, false, true, true, false, false, true, true, false, true, true, false, false, false, false, true, false, false, true, false, false, true, true, false, false, true, false, false, false, false, true, true, true, false, false, false, false, false, true, true, false, true, false, true, false, false, false, false, false, true, false, false, false, true, true, false, false, false, false, true, false, false, false, true, false, false, false, false, true, true, false, true, false, false, false, false, false, false, false, true, false, false, true, false, true, false, true, false, false, false, true, true, true, false, true, false, true, false, true, true, false, false, false, false, true, false, true, false, true, false, false, false, false, false, false, false, false, false, true, false, false, false, false, false, false, false, false, false, false, false, false, false, false, false, false, true, false, false, false, false, false, false, false, false, false, false, false, false, false, false, false, false, false, false, false, false, false, false, false, false, false, false, false, false, false, false, false, false, false, false, false, false, false, false, false, false, false, false, false, false, false, false, false, false, false, false, false, false, false, false, false, false], [false, false, true, false, false, false, false, true, false, false, false, false, false, false, false, false, false, false, false, false, false, false, false, false, false, false, false, false, true, false, true, false, false, true, true, true, true, false, true, true, true, false, false, false, false, false, false, true, false, false, false, false, true, true, true, true, false, false, true, true, true, true, true, true, false, true, false, false, false, false, false, false, true, false, false, false, false, false, false, false, false, true, false, false, false, false, false, false, true, true, false, false, false, true, false, false, false, false, false, false, false, true, false, false, true, false, false, false, false, false, false, false, false, true, false, false, false, false, false, false, true, true, false, false, false, false, false, false, false, false, false, false, false, false, false, false, false, false, false, false, false, false, false, false, false, false, false, false, false, false, false, false, true, false, false, false, false, false, false, true, false, false, false, true, true, false, false, false, false, false, false, false, false, false, false, false, false, false, false, true, false, true, false, false, false, false, false, false, false, false, false, true, false, false, false, false, true, true, false, false, false, false, false, true, false, true, true, false, true, false, false, true, false, false, false, false, true, false, true, false, false, false, false, false, false, true, true, true, false, false, false, false, true, false, false, true, false, false, false, false, true, false, true, true, false, false, false, false, false, true, false, false, false, false, true, false, false, false, false, true, true, false, false, false, false, false, true, false, false, false, true, false, false, false, false, false, false, true, true, true, false, false, false, false, false, false, false, false, false, false, false, false, false, false, false, false, false, false, false, false, false, true, false, false, false, true, false, false, false, false, false, true, true, false, true, false, true, true, false, true, false, false, false, false, false, false, false, false, false, false, true, true, false, false, true, true, false, true, true, false, false, false, false, true, false, false, true, false, false, true, true, false, false, true, false, false, false, false, true, true, true, false, false, false, false, false, true, true, false, true, false, true, false, false, false, false, false, true, false, false, false, true, true, false, false, false, false, true, false, false, false, true, false, false, false, false, true, true, false, true, false, false, false, false, false, false, false, true, false, false, true, false, true, false, true, false, false, false, true, true, true, false, true, false, true, false, true, true, false, false, false, false, true, false, true, false, true, false, false, false, false, false, false, false, false, false, true, false, false, false, false, false, false, false, false, false, false, false, false, false, false, false, false, true, false, false, false, false, false, false, false, false, false, false, false, false, false, false, false, false, false, false, false, false, false, false, false, false, false, false, false, false, false, false, false, false, false, false, false, false, false, false, false, false, false, false, false, false, false, false, false, false, false, false, false, false, false, false, false, false], [false, false, true, false, false, false, false, true, false, false, false, false, false, false, false, false, false, false, false, false, false, false, false, false, false, false, false, false, true, false, true, false, false, true, true, true, true, false, true, true, true, false, false, false, false, false, false, true, false, false, false, false, true, true, true, true, false, false, true, true, true, true, true, true, false, true, false, false, false, false, false, false, true, false, false, false, false, false, false, false, false, true, false, false, false, false, false, false, true, true, false, false, false, true, false, false, false, false, false, false, false, true, false, false, true, false, false, false, false, false, false, false, false, true, false, false, false, false, false, false, true, true, false, false, false, false, false, false, false, false, false, false, false, false, false, false, false, false, false, false, false, false, false, false, false, false, false, false, false, false, false, false, true, false, false, false, false, false, false, true, false, false, false, true, true, false, false, false, false, false, false, false, false, false, false, false, false, false, false, true, false, true, false, false, false, false, false, false, false, false, false, true, false, false, false, false, true, true, false, false, false, false, false, true, false, true, true, false, true, false, false, true, false, false, false, false, true, false, true, false, false, false, false, false, false, true, true, true, false, false, false, false, true, false, false, true, false, false, false, false, true, false, true, true, false, false, false, false, false, true, false, false, false, false, true, false, false, false, false, true, true, false, false, false, false, false, true, false, false, false, true, false, false, false, false, false, false, true, true, true, false, false, false, false, false, false, false, false, false, false, false, false, false, false, false, false, false, false, false, false, false, true, false, false, false, true, false, false, false, false, false, true, true, false, true, false, true, true, false, true, false, false, false, false, false, false, false, false, false, false, true, true, false, false, true, true, false, true, true, false, false, false, false, true, false, false, true, false, false, true, true, false, false, true, false, false, false, false, true, true, true, false, false, false, false, false, true, true, false, true, false, true, false, false, false, false, false, true, false, false, false, true, true, false, false, false, false, true, false, false, false, true, false, false, false, false, true, true, false, true, false, false, false, false, false, false, false, true, false, false, true, false, true, false, true, false, false, false, true, true, true, false, true, false, true, false, true, true, false, false, false, false, true, false, true, false, true, false, false, false, false, false, false, false, false, false, true, false, false, false, false, false, false, false, false, false, false, false, false, false, false, false, false, true, false, false, false, false, false, false, false, false, false, false, false, false, false, false, false, false, false, false, false, false, false, false, false, false, false, false, false, false, false, false, false, false, false, false, false, false, false, false, false, false, false, false, false, false, false, false, false, false, false, false, false, false, false, false, false, false], [false, false, true, false, false, false, false, true, false, false, false, false, false, false, false, false, false, false, false, false, false, false, false, false, false, false, false, false, true, false, true, false, false, true, true, true, true, false, true, true, true, false, false, false, false, false, false, true, false, false, false, false, true, true, true, true, false, false, true, true, true, true, true, true, false, true, false, false, false, false, false, false, true, false, false, false, false, false, false, false, false, true, false, false, false, false, false, false, true, true, false, false, false, true, false, false, false, false, false, false, false, true, false, false, true, false, false, false, false, false, false, false, false, true, false, false, false, false, false, false, true, true, false, false, false, false, false, false, false, false, false, false, false, false, false, false, false, false, false, false, false, false, false, false, false, false, false, false, false, false, false, false, true, false, false, false, false, false, false, true, false, false, false, true, true, false, false, false, false, false, false, false, false, false, false, false, false, false, false, true, false, true, false, false, false, false, false, false, false, false, false, true, false, false, false, false, true, true, false, false, false, false, false, true, false, true, true, false, true, false, false, true, false, false, false, false, true, false, true, false, false, false, false, false, false, true, true, true, false, false, false, false, true, false, false, true, false, false, false, false, true, false, true, true, false, false, false, false, false, true, false, false, false, false, true, false, false, false, false, true, true, false, false, false, false, false, true, false, false, false, true, false, false, false, false, false, false, true, true, true, false, false, false, false, false, false, false, false, false, false, false, false, false, false, false, false, false, false, false, false, false, true, false, false, false, true, false, false, false, false, false, true, true, false, true, false, true, true, false, true, false, false, false, false, false, false, false, false, false, false, true, true, false, false, true, true, false, true, true, false, false, false, false, true, false, false, true, false, false, true, true, false, false, true, false, false, false, false, true, true, true, false, false, false, false, false, true, true, false, true, false, true, false, false, false, false, false, true, false, false, false, true, true, false, false, false, false, true, false, false, false, true, false, false, false, false, true, true, false, true, false, false, false, false, false, false, false, true, false, false, true, false, true, false, true, false, false, false, true, true, true, false, true, false, true, false, true, true, false, false, false, false, true, false, true, false, true, false, false, false, false, false, false, false, false, false, true, false, false, false, false, false, false, false, false, false, false, false, false, false, false, false, false, true, false, false, false, false, false, false, false, false, false, false, false, false, false, false, false, false, false, false, false, false, false, false, false, false, false, false, false, false, false, false, false, false, false, false, false, false, false, false, false, false, false, false, false, false, false, false, false, false, false, false, false, false, false, false, false, false], [false, false, true, false, false, false, false, true, false, false, false, false, false, false, false, false, false, false, false, false, false, false, false, false, false, false, false, false, true, false, true, false, false, true, true, true, true, false, true, true, true, false, false, false, false, false, false, true, false, false, false, false, true, true, true, true, false, false, true, true, true, true, true, true, false, true, false, false, false, false, false, false, true, false, false, false, false, false, false, false, false, true, false, false, false, false, false, false, true, true, false, false, false, true, false, false, false, false, false, false, false, true, false, false, true, false, false, false, false, false, false, false, false, true, false, false, false, false, false, false, true, true, false, false, false, false, false, false, false, false, false, false, false, false, false, false, false, false, false, false, false, false, false, false, false, false, false, false, false, false, false, false, true, false, false, false, false, false, false, true, false, false, false, true, true, false, false, false, false, false, false, false, false, false, false, false, false, false, false, true, false, true, false, false, false, false, false, false, false, false, false, true, false, false, false, false, true, true, false, false, false, false, false, true, false, true, true, false, true, false, false, true, false, false, false, false, true, false, true, false, false, false, false, false, false, true, true, true, false, false, false, false, true, false, false, true, false, false, false, false, true, false, true, true, false, false, false, false, false, true, false, false, false, false, true, false, false, false, false, true, true, false, false, false, false, false, true, false, false, false, true, false, false, false, false, false, false, true, true, true, false, false, false, false, false, false, false, false, false, false, false, false, false, false, false, false, false, false, false, false, false, true, false, false, false, true, false, false, false, false, false, true, true, false, true, false, true, true, false, true, false, false, false, false, false, false, false, false, false, false, true, true, false, false, true, true, false, true, true, false, false, false, false, true, false, false, true, false, false, true, true, false, false, true, false, false, false, false, true, true, true, false, false, false, false, false, true, true, false, true, false, true, false, false, false, false, false, true, false, false, false, true, true, false, false, false, false, true, false, false, false, true, false, false, false, false, true, true, false, true, false, false, false, false, false, false, false, true, false, false, true, false, true, false, true, false, false, false, true, true, true, false, true, false, true, false, true, true, false, false, false, false, true, false, true, false, true, false, false, false, false, false, false, false, false, false, true, false, false, false, false, false, false, false, false, false, false, false, false, false, false, false, false, true, false, false, false, false, false, false, false, false, false, false, false, false, false, false, false, false, false, false, false, false, false, false, false, false, false, false, false, false, false, false, false, false, false, false, false, false, false, false, false, false, false, false, false, false, false, false, false, false, false, false, false, false, false, false, false, false], [false, false, true, false, false, false, false, true, false, false, false, false, false, false, false, false, false, false, false, false, false, false, false, false, false, false, false, false, true, false, true, false, false, true, true, true, true, false, true, true, true, false, false, false, false, false, false, true, false, false, false, false, true, true, true, true, false, false, true, true, true, true, true, true, false, true, false, false, false, false, false, false, true, false, false, false, false, false, false, false, false, true, false, false, false, false, false, false, true, true, false, false, false, true, false, false, false, false, false, false, false, true, false, false, true, false, false, false, false, false, false, false, false, true, false, false, false, false, false, false, true, true, false, false, false, false, false, false, false, false, false, false, false, false, false, false, false, false, false, false, false, false, false, false, false, false, false, false, false, false, false, false, true, false, false, false, false, false, false, true, false, false, false, true, true, false, false, false, false, false, false, false, false, false, false, false, false, false, false, true, false, true, false, false, false, false, false, false, false, false, false, true, false, false, false, false, true, true, false, false, false, false, false, true, false, true, true, false, true, false, false, true, false, false, false, false, true, false, true, false, false, false, false, false, false, true, true, true, false, false, false, false, true, false, false, true, false, false, false, false, true, false, true, true, false, false, false, false, false, true, false, false, false, false, true, false, false, false, false, true, true, false, false, false, false, false, true, false, false, false, true, false, false, false, false, false, false, true, true, true, false, false, false, false, false, false, false, false, false, false, false, false, false, false, false, false, false, false, false, false, false, true, false, false, false, true, false, false, false, false, false, true, true, false, true, false, true, true, false, true, false, false, false, false, false, false, false, false, false, false, true, true, false, false, true, true, false, true, true, false, false, false, false, true, false, false, true, false, false, true, true, false, false, true, false, false, false, false, true, true, true, false, false, false, false, false, true, true, false, true, false, true, false, false, false, false, false, true, false, false, false, true, true, false, false, false, false, true, false, false, false, true, false, false, false, false, true, true, false, true, false, false, false, false, false, false, false, true, false, false, true, false, true, false, true, false, false, false, true, true, true, false, true, false, true, false, true, true, false, false, false, false, true, false, true, false, true, false, false, false, false, false, false, false, false, false, true, false, false, false, false, false, false, false, false, false, false, false, false, false, false, false, false, true, false, false, false, false, false, false, false, false, false, false, false, false, false, false, false, false, false, false, false, false, false, false, false, false, false, false, false, false, false, false, false, false, false, false, false, false, false, false, false, false, false, false, false, false, false, false, false, false, false, false, false, false, false, false, false, false], [false, false, true, false, false, false, false, true, false, false, false, false, false, false, false, false, false, false, false, false, false, false, false, false, false, false, false, false, true, false, true, false, false, true, true, true, true, false, true, true, true, false, false, false, false, false, false, true, false, false, false, false, true, true, true, true, false, false, true, true, true, true, true, true, false, true, false, false, false, false, false, false, true, false, false, false, false, false, false, false, false, true, false, false, false, false, false, false, true, true, false, false, false, true, false, false, false, false, false, false, false, true, false, false, true, false, false, false, false, false, false, false, false, true, false, false, false, false, false, false, true, true, false, false, false, false, false, false, false, false, false, false, false, false, false, false, false, false, false, false, false, false, false, false, false, false, false, false, false, false, false, false, true, false, false, false, false, false, false, true, false, false, false, true, true, false, false, false, false, false, false, false, false, false, false, false, false, false, false, true, false, true, false, false, false, false, false, false, false, false, false, true, false, false, false, false, true, true, false, false, false, false, false, true, false, true, true, false, true, false, false, true, false, false, false, false, true, false, true, false, false, false, false, false, false, true, true, true, false, false, false, false, true, false, false, true, false, false, false, false, true, false, true, true, false, false, false, false, false, true, false, false, false, false, true, false, false, false, false, true, true, false, false, false, false, false, true, false, false, false, true, false, false, false, false, false, false, true, true, true, false, false, false, false, false, false, false, false, false, false, false, false, false, false, false, false, false, false, false, false, false, true, false, false, false, true, false, false, false, false, false, true, true, false, true, false, true, true, false, true, false, false, false, false, false, false, false, false, false, false, true, true, false, false, true, true, false, true, true, false, false, false, false, true, false, false, true, false, false, true, true, false, false, true, false, false, false, false, true, true, true, false, false, false, false, false, true, true, false, true, false, true, false, false, false, false, false, true, false, false, false, true, true, false, false, false, false, true, false, false, false, true, false, false, false, false, true, true, false, true, false, false, false, false, false, false, false, true, false, false, true, false, true, false, true, false, false, false, true, true, true, false, true, false, true, false, true, true, false, false, false, false, true, false, true, false, true, false, false, false, false, false, false, false, false, false, true, false, false, false, false, false, false, false, false, false, false, false, false, false, false, false, false, true, false, false, false, false, false, false, false, false, false, false, false, false, false, false, false, false, false, false, false, false, false, false, false, false, false, false, false, false, false, false, false, false, false, false, false, false, false, false, false, false, false, false, false, false, false, false, false, false, false, false, false, false, false, false, false, false], [false, false, true, false, false, false, false, true, false, false, false, false, false, false, false, false, false, false, false, false, false, false, false, false, false, false, false, false, true, false, true, false, false, true, true, true, true, false, true, true, true, false, false, false, false, false, false, true, false, false, false, false, true, true, true, true, false, false, true, true, true, true, true, true, false, true, false, false, false, false, false, false, true, false, false, false, false, false, false, false, false, true, false, false, false, false, false, false, true, true, false, false, false, true, false, false, false, false, false, false, false, true, false, false, true, false, false, false, false, false, false, false, false, true, false, false, false, false, false, false, true, true, false, false, false, false, false, false, false, false, false, false, false, false, false, false, false, false, false, false, false, false, false, false, false, false, false, false, false, false, false, false, true, false, false, false, false, false, false, true, false, false, false, true, true, false, false, false, false, false, false, false, false, false, false, false, false, false, false, true, false, true, false, false, false, false, false, false, false, false, false, true, false, false, false, false, true, true, false, false, false, false, false, true, false, true, true, false, true, false, false, true, false, false, false, false, true, false, true, false, false, false, false, false, false, true, true, true, false, false, false, false, true, false, false, true, false, false, false, false, true, false, true, true, false, false, false, false, false, true, false, false, false, false, true, false, false, false, false, true, true, false, false, false, false, false, true, false, false, false, true, false, false, false, false, false, false, true, true, true, false, false, false, false, false, false, false, false, false, false, false, false, false, false, false, false, false, false, false, false, false, true, false, false, false, true, false, false, false, false, false, true, true, false, true, false, true, true, false, true, false, false, false, false, false, false, false, false, false, false, true, true, false, false, true, true, false, true, true, false, false, false, false, true, false, false, true, false, false, true, true, false, false, true, false, false, false, false, true, true, true, false, false, false, false, false, true, true, false, true, false, true, false, false, false, false, false, true, false, false, false, true, true, false, false, false, false, true, false, false, false, true, false, false, false, false, true, true, false, true, false, false, false, false, false, false, false, true, false, false, true, false, true, false, true, false, false, false, true, true, true, false, true, false, true, false, true, true, false, false, false, false, true, false, true, false, true, false, false, false, false, false, false, false, false, false, true, false, false, false, false, false, false, false, false, false, false, false, false, false, false, false, false, true, false, false, false, false, false, false, false, false, false, false, false, false, false, false, false, false, false, false, false, false, false, false, false, false, false, false, false, false, false, false, false, false, false, false, false, false, false, false, false, false, false, false, false, false, false, false, false, false, false, false, false, false, false, false, false, false], [false, false, true, false, false, false, false, true, false, false, false, false, false, false, false, false, false, false, false, false, false, false, false, false, false, false, false, false, true, false, true, false, false, true, true, true, true, false, true, true, true, false, false, false, false, false, false, true, false, false, false, false, true, true, true, true, false, false, true, true, true, true, true, true, false, true, false, false, false, false, false, false, true, false, false, false, false, false, false, false, false, true, false, false, false, false, false, false, true, true, false, false, false, true, false, false, false, false, false, false, false, true, false, false, true, false, false, false, false, false, false, false, false, true, false, false, false, false, false, false, true, true, false, false, false, false, false, false, false, false, false, false, false, false, false, false, false, false, false, false, false, false, false, false, false, false, false, false, false, false, false, false, true, false, false, false, false, false, false, true, false, false, false, true, true, false, false, false, false, false, false, false, false, false, false, false, false, false, false, true, false, true, false, false, false, false, false, false, false, false, false, true, false, false, false, false, true, true, false, false, false, false, false, true, false, true, true, false, true, false, false, true, false, false, false, false, true, false, true, false, false, false, false, false, false, true, true, true, false, false, false, false, true, false, false, true, false, false, false, false, true, false, true, true, false, false, false, false, false, true, false, false, false, false, true, false, false, false, false, true, true, false, false, false, false, false, true, false, false, false, true, false, false, false, false, false, false, true, true, true, false, false, false, false, false, false, false, false, false, false, false, false, false, false, false, false, false, false, false, false, false, true, false, false, false, true, false, false, false, false, false, true, true, false, true, false, true, true, false, true, false, false, false, false, false, false, false, false, false, false, true, true, false, false, true, true, false, true, true, false, false, false, false, true, false, false, true, false, false, true, true, false, false, true, false, false, false, false, true, true, true, false, false, false, false, false, true, true, false, true, false, true, false, false, false, false, false, true, false, false, false, true, true, false, false, false, false, true, false, false, false, true, false, false, false, false, true, true, false, true, false, false, false, false, false, false, false, true, false, false, true, false, true, false, true, false, false, false, true, true, true, false, true, false, true, false, true, true, false, false, false, false, true, false, true, false, true, false, false, false, false, false, false, false, false, false, true, false, false, false, false, false, false, false, false, false, false, false, false, false, false, false, false, true, false, false, false, false, false, false, false, false, false, false, false, false, false, false, false, false, false, false, false, false, false, false, false, false, false, false, false, false, false, false, false, false, false, false, false, false, false, false, false, false, false, false, false, false, false, false, false, false, false, false, false, false, false, false, false, false], [false, false, true, false, false, false, false, true, false, false, false, false, false, false, false, false, false, false, false, false, false, false, false, false, false, false, false, false, true, false, true, false, false, true, true, true, true, false, true, true, true, false, false, false, false, false, false, true, false, false, false, false, true, true, true, true, false, false, true, true, true, true, true, true, false, true, false, false, false, false, false, false, true, false, false, false, false, false, false, false, false, true, false, false, false, false, false, false, true, true, false, false, false, true, false, false, false, false, false, false, false, true, false, false, true, false, false, false, false, false, false, false, false, true, false, false, false, false, false, false, true, true, false, false, false, false, false, false, false, false, false, false, false, false, false, false, false, false, false, false, false, false, false, false, false, false, false, false, false, false, false, false, true, false, false, false, false, false, false, true, false, false, false, true, true, false, false, false, false, false, false, false, false, false, false, false, false, false, false, true, false, true, false, false, false, false, false, false, false, false, false, true, false, false, false, false, true, true, false, false, false, false, false, true, false, true, true, false, true, false, false, true, false, false, false, false, true, false, true, false, false, false, false, false, false, true, true, true, false, false, false, false, true, false, false, true, false, false, false, false, true, false, true, true, false, false, false, false, false, true, false, false, false, false, true, false, false, false, false, true, true, false, false, false, false, false, true, false, false, false, true, false, false, false, false, false, false, true, true, true, false, false, false, false, false, false, false, false, false, false, false, false, false, false, false, false, false, false, false, false, false, true, false, false, false, true, false, false, false, false, false, true, true, false, true, false, true, true, false, true, false, false, false, false, false, false, false, false, false, false, true, true, false, false, true, true, false, true, true, false, false, false, false, true, false, false, true, false, false, true, true, false, false, true, false, false, false, false, true, true, true, false, false, false, false, false, true, true, false, true, false, true, false, false, false, false, false, true, false, false, false, true, true, false, false, false, false, true, false, false, false, true, false, false, false, false, true, true, false, true, false, false, false, false, false, false, false, true, false, false, true, false, true, false, true, false, false, false, true, true, true, false, true, false, true, false, true, true, false, false, false, false, true, false, true, false, true, false, false, false, false, false, false, false, false, false, true, false, false, false, false, false, false, false, false, false, false, false, false, false, false, false, false, true, false, false, false, false, false, false, false, false, false, false, false, false, false, false, false, false, false, false, false, false, false, false, false, false, false, false, false, false, false, false, false, false, false, false, false, false, false, false, false, false, false, false, false, false, false, false, false, false, false, false, false, false, false, false, false, false], [false, false, true, false, false, false, false, true, false, false, false, false, false, false, false, false, false, false, false, false, false, false, false, false, false, false, false, false, true, false, true, false, false, true, true, true, true, false, true, true, true, false, false, false, false, false, false, true, false, false, false, false, true, true, true, true, false, false, true, true, true, true, true, true, false, true, false, false, false, false, false, false, true, false, false, false, false, false, false, false, false, true, false, false, false, false, false, false, true, true, false, false, false, true, false, false, false, false, false, false, false, true, false, false, true, false, false, false, false, false, false, false, false, true, false, false, false, false, false, false, true, true, false, false, false, false, false, false, false, false, false, false, false, false, false, false, false, false, false, false, false, false, false, false, false, false, false, false, false, false, false, false, true, false, false, false, false, false, false, true, false, false, false, true, true, false, false, false, false, false, false, false, false, false, false, false, false, false, false, true, false, true, false, false, false, false, false, false, false, false, false, true, false, false, false, false, true, true, false, false, false, false, false, true, false, true, true, false, true, false, false, true, false, false, false, false, true, false, true, false, false, false, false, false, false, true, true, true, false, false, false, false, true, false, false, true, false, false, false, false, true, false, true, true, false, false, false, false, false, true, false, false, false, false, true, false, false, false, false, true, true, false, false, false, false, false, true, false, false, false, true, false, false, false, false, false, false, true, true, true, false, false, false, false, false, false, false, false, false, false, false, false, false, false, false, false, false, false, false, false, false, true, false, false, false, true, false, false, false, false, false, true, true, false, true, false, true, true, false, true, false, false, false, false, false, false, false, false, false, false, true, true, false, false, true, true, false, true, true, false, false, false, false, true, false, false, true, false, false, true, true, false, false, true, false, false, false, false, true, true, true, false, false, false, false, false, true, true, false, true, false, true, false, false, false, false, false, true, false, false, false, true, true, false, false, false, false, true, false, false, false, true, false, false, false, false, true, true, false, true, false, false, false, false, false, false, false, true, false, false, true, false, true, false, true, false, false, false, true, true, true, false, true, false, true, false, true, true, false, false, false, false, true, false, true, false, true, false, false, false, false, false, false, false, false, false, true, false, false, false, false, false, false, false, false, false, false, false, false, false, false, false, false, true, false, false, false, false, false, false, false, false, false, false, false, false, false, false, false, false, false, false, false, false, false, false, false, false, false, false, false, false, false, false, false, false, false, false, false, false, false, false, false, false, false, false, false, false, false, false, false, false, false, false, false, false, false, false, false, false], [false, false, false, false, false, false, false, false, false, false, false, false, false, false, false, false, false, false, false, false, false, false, true, false, false, false, true, true, false, false, false, true, false, true, false, false, true, true, false, true, false, true, false, false, true, false, false, false, false, false, false, false, true, false, true, false, true, false, false, true, false, false, false, false, false, false, false, true, false, false, false, false, false, false, false, false, false, false, false, true, false, false, false, false, false, false, false, false, false, true, false, false, false, true, false, false, false, false, false, false, false, false, false, false, false, false, false, false, false, false, false, true, false, false, false, false, false, true, false, false, false, false, false, false, false, false, false, false, true, false, false, false, true, false, false, true, false, true, false, true, false, false, false, true, false, false, false, false, false, false, true, false, false, true, false, false, false, false, false, false, false, false, false, true, true, false, false, false, false, false, false, false, false, false, false, false, false, false, false, false, true, true, false, true, false, false, false, true, true, false, false, false, false, false, false, false, false, false, false, false, false, true, true, false, false, false, false, false, false, true, false, false, false, false, true, false, false, false, false, false, false, false, false, false, false, true, false, false, true, true, false, false, true, false, true, false, true, false, false, false, true, true, false, false, true, false, false, true, false, true, false, true, false, false, true, false, false, false, false, false, false, false, false, false, true, true, true, true, false, false, true, false, false, false, false, true, false, false, false, false, false, false, true, false, false, false, false, false, false, false, false, true, true, true, false, false, true, false, true, true, false, false, true, false, true, false, true, false, false, false, false, false, true, true, false, true, false, false, false, true, true, false, false, true, true, false, true, true, false, true, true, true, false, false, false, true, false, true, false, true, false, false, false, true, false, false, true, true, true, false, false, false, true, true, false, false, true, false, false, false, false, false, false, false, false, false, false, true, false, false, true, false, false, false, true, false, false, false, false, false, false, false, false, true, false, false, false, false, false, true, false, true, false, true, false, true, false, false, false, false, false, true, true, false, false, false, false, true, false, true, false, false, true, false, true, false, false, false, true, true, false, false, false, false, true, true, false, true, false, true, false, true, false, false, false, false, false, true, true, false, false, false, false, true, false, false, false, false, true, true, true, true, false, false, false, true, false, false, false, false, false, false, false, false, false, false, false, false, false, false, false, false, false, false, false, false, false, false, false, false, false, false, false, false, false, false, false, false, false, false, false, false, false, false, false, false, false, false, false, false, false, false, false, false, false, false], [false, false, false, false, false, false, false, false, false, false, false, false, false, false, false, false, false, false, false, false, false, false, true, false, false, false, true, true, false, false, false, true, false, true, false, false, true, true, false, true, false, true, false, false, true, false, false, false, false, false, false, false, true, false, true, false, true, false, false, true, false, false, false, false, false, false, false, true, false, false, false, false, false, false, false, false, false, false, false, true, false, false, false, false, false, false, false, false, false, true, false, false, false, true, false, false, false, false, false, false, false, false, false, false, false, false, false, false, false, false, false, true, false, false, false, false, false, true, false, false, false, false, false, false, false, false, false, false, true, false, false, false, true, false, false, true, false, true, false, true, false, false, false, true, false, false, false, false, false, false, true, false, false, true, false, false, false, false, false, false, false, false, false, true, true, false, false, false, false, false, false, false, false, false, false, false, false, false, false, false, true, true, false, true, false, false, false, true, true, false, false, false, false, false, false, false, false, false, false, false, false, true, true, false, false, false, false, false, false, true, false, false, false, false, true, false, false, false, false, false, false, false, false, false, false, true, false, false, true, true, false, false, true, false, true, false, true, false, false, false, true, true, false, false, true, false, false, true, false, true, false, true, false, false, true, false, false, false, false, false, false, false, false, false, true, true, true, true, false, false, true, false, false, false, false, true, false, false, false, false, false, false, true, false, false, false, false, false, false, false, false, true, true, true, false, false, true, false, true, true, false, false, true, false, true, false, true, false, false, false, false, false, true, true, false, true, false, false, false, true, true, false, false, true, true, false, true, true, false, true, true, true, false, false, false, true, false, true, false, true, false, false, false, true, false, false, true, true, true, false, false, false, true, true, false, false, true, false, false, false, false, false, false, false, false, false, false, true, false, false, true, false, false, false, true, false, false, false, false, false, false, false, false, true, false, false, false, false, false, true, false, true, false, true, false, true, false, false, false, false, false, true, true, false, false, false, false, true, false, true, false, false, true, false, true, false, false, false, true, true, false, false, false, false, true, true, false, true, false, true, false, true, false, false, false, false, false, true, true, false, false, false, false, true, false, false, false, false, true, true, true, true, false, false, false, true, false, false, false, false, false, false, false, false, false, false, false, false, false, false, false, false, false, false, false, false, false, false, false, false, false, false, false, false, false, false, false, false, false, false, false, false, false, false, false, false, false, false, false, false, false, false, false, false, false, false], [false, false, false, false, false, false, false, false, false, false, false, false, false, false, false, false, false, false, false, false, false, false, true, false, false, false, true, true, false, false, false, true, false, true, false, false, true, true, false, true, false, true, false, false, true, false, false, false, false, false, false, false, true, false, true, false, true, false, false, true, false, false, false, false, false, false, false, true, false, false, false, false, false, false, false, false, false, false, false, true, false, false, false, false, false, false, false, false, false, true, false, false, false, true, false, false, false, false, false, false, false, false, false, false, false, false, false, false, false, false, false, true, false, false, false, false, false, true, false, false, false, false, false, false, false, false, false, false, true, false, false, false, true, false, false, true, false, true, false, true, false, false, false, true, false, false, false, false, false, false, true, false, false, true, false, false, false, false, false, false, false, false, false, true, true, false, false, false, false, false, false, false, false, false, false, false, false, false, false, false, true, true, false, true, false, false, false, true, true, false, false, false, false, false, false, false, false, false, false, false, false, true, true, false, false, false, false, false, false, true, false, false, false, false, true, false, false, false, false, false, false, false, false, false, false, true, false, false, true, true, false, false, true, false, true, false, true, false, false, false, true, true, false, false, true, false, false, true, false, true, false, true, false, false, true, false, false, false, false, false, false, false, false, false, true, true, true, true, false, false, true, false, false, false, false, true, false, false, false, false, false, false, true, false, false, false, false, false, false, false, false, true, true, true, false, false, true, false, true, true, false, false, true, false, true, false, true, false, false, false, false, false, true, true, false, true, false, false, false, true, true, false, false, true, true, false, true, true, false, true, true, true, false, false, false, true, false, true, false, true, false, false, false, true, false, false, true, true, true, false, false, false, true, true, false, false, true, false, false, false, false, false, false, false, false, false, false, true, false, false, true, false, false, false, true, false, false, false, false, false, false, false, false, true, false, false, false, false, false, true, false, true, false, true, false, true, false, false, false, false, false, true, true, false, false, false, false, true, false, true, false, false, true, false, true, false, false, false, true, true, false, false, false, false, true, true, false, true, false, true, false, true, false, false, false, false, false, true, true, false, false, false, false, true, false, false, false, false, true, true, true, true, false, false, false, true, false, false, false, false, false, false, false, false, false, false, false, false, false, false, false, false, false, false, false, false, false, false, false, false, false, false, false, false, false, false, false, false, false, false, false, false, false, false, false, false, false, false, false, false, false, false, false, false, false, false], [false, false, false, false, false, false, false, false, false, false, false, false, false, false, false, false, false, false, false, false, false, false, true, false, false, false, true, true, false, false, false, true, false, true, false, false, true, true, false, true, false, true, false, false, true, false, false, false, false, false, false, false, true, false, true, false, true, false, false, true, false, false, false, false, false, false, false, true, false, false, false, false, false, false, false, false, false, false, false, true, false, false, false, false, false, false, false, false, false, true, false, false, false, true, false, false, false, false, false, false, false, false, false, false, false, false, false, false, false, false, false, true, false, false, false, false, false, true, false, false, false, false, false, false, false, false, false, false, true, false, false, false, true, false, false, true, false, true, false, true, false, false, false, true, false, false, false, false, false, false, true, false, false, true, false, false, false, false, false, false, false, false, false, true, true, false, false, false, false, false, false, false, false, false, false, false, false, false, false, false, true, true, false, true, false, false, false, true, true, false, false, false, false, false, false, false, false, false, false, false, false, true, true, false, false, false, false, false, false, true, false, false, false, false, true, false, false, false, false, false, false, false, false, false, false, true, false, false, true, true, false, false, true, false, true, false, true, false, false, false, true, true, false, false, true, false, false, true, false, true, false, true, false, false, true, false, false, false, false, false, false, false, false, false, true, true, true, true, false, false, true, false, false, false, false, true, false, false, false, false, false, false, true, false, false, false, false, false, false, false, false, true, true, true, false, false, true, false, true, true, false, false, true, false, true, false, true, false, false, false, false, false, true, true, false, true, false, false, false, true, true, false, false, true, true, false, true, true, false, true, true, true, false, false, false, true, false, true, false, true, false, false, false, true, false, false, true, true, true, false, false, false, true, true, false, false, true, false, false, false, false, false, false, false, false, false, false, true, false, false, true, false, false, false, true, false, false, false, false, false, false, false, false, true, false, false, false, false, false, true, false, true, false, true, false, true, false, false, false, false, false, true, true, false, false, false, false, true, false, true, false, false, true, false, true, false, false, false, true, true, false, false, false, false, true, true, false, true, false, true, false, true, false, false, false, false, false, true, true, false, false, false, false, true, false, false, false, false, true, true, true, true, false, false, false, true, false, false, false, false, false, false, false, false, false, false, false, false, false, false, false, false, false, false, false, false, false, false, false, false, false, false, false, false, false, false, false, false, false, false, false, false, false, false, false, false, false, false, false, false, false, false, false, false, false, false], [false, false, false, false, false, false, false, false, false, false, false, false, false, false, false, false, false, false, false, false, false, false, true, false, false, false, true, true, false, false, false, true, false, true, false, false, true, true, false, true, false, true, false, false, true, false, false, false, false, false, false, false, true, false, true, false, true, false, false, true, false, false, false, false, false, false, false, true, false, false, false, false, false, false, false, false, false, false, false, true, false, false, false, false, false, false, false, false, false, true, false, false, false, true, false, false, false, false, false, false, false, false, false, false, false, false, false, false, false, false, false, true, false, false, false, false, false, true, false, false, false, false, false, false, false, false, false, false, true, false, false, false, true, false, false, true, false, true, false, true, false, false, false, true, false, false, false, false, false, false, true, false, false, true, false, false, false, false, false, false, false, false, false, true, true, false, false, false, false, false, false, false, false, false, false, false, false, false, false, false, true, true, false, true, false, false, false, true, true, false, false, false, false, false, false, false, false, false, false, false, false, true, true, false, false, false, false, false, false, true, false, false, false, false, true, false, false, false, false, false, false, false, false, false, false, true, false, false, true, true, false, false, true, false, true, false, true, false, false, false, true, true, false, false, true, false, false, true, false, true, false, true, false, false, true, false, false, false, false, false, false, false, false, false, true, true, true, true, false, false, true, false, false, false, false, true, false, false, false, false, false, false, true, false, false, false, false, false, false, false, false, true, true, true, false, false, true, false, true, true, false, false, true, false, true, false, true, false, false, false, false, false, true, true, false, true, false, false, false, true, true, false, false, true, true, false, true, true, false, true, true, true, false, false, false, true, false, true, false, true, false, false, false, true, false, false, true, true, true, false, false, false, true, true, false, false, true, false, false, false, false, false, false, false, false, false, false, true, false, false, true, false, false, false, true, false, false, false, false, false, false, false, false, true, false, false, false, false, false, true, false, true, false, true, false, true, false, false, false, false, false, true, true, false, false, false, false, true, false, true, false, false, true, false, true, false, false, false, true, true, false, false, false, false, true, true, false, true, false, true, false, true, false, false, false, false, false, true, true, false, false, false, false, true, false, false, false, false, true, true, true, true, false, false, false, true, false, false, false, false, false, false, false, false, false, false, false, false, false, false, false, false, false, false, false, false, false, false, false, false, false, false, false, false, false, false, false, false, false, false, false, false, false, false, false, false, false, false, false, false, false, false, false, false, false, false], [false, false, false, false, false, false, false, false, false, false, false, false, false, false, false, false, false, false, false, false, false, false, true, false, false, false, true, true, false, false, false, true, false, true, false, false, true, true, false, true, false, true, false, false, true, false, false, false, false, false, false, false, true, false, true, false, true, false, false, true, false, false, false, false, false, false, false, true, false, false, false, false, false, false, false, false, false, false, false, true, false, false, false, false, false, false, false, false, false, true, false, false, false, true, false, false, false, false, false, false, false, false, false, false, false, false, false, false, false, false, false, true, false, false, false, false, false, true, false, false, false, false, false, false, false, false, false, false, true, false, false, false, true, false, false, true, false, true, false, true, false, false, false, true, false, false, false, false, false, false, true, false, false, true, false, false, false, false, false, false, false, false, false, true, true, false, false, false, false, false, false, false, false, false, false, false, false, false, false, false, true, true, false, true, false, false, false, true, true, false, false, false, false, false, false, false, false, false, false, false, false, true, true, false, false, false, false, false, false, true, false, false, false, false, true, false, false, false, false, false, false, false, false, false, false, true, false, false, true, true, false, false, true, false, true, false, true, false, false, false, true, true, false, false, true, false, false, true, false, true, false, true, false, false, true, false, false, false, false, false, false, false, false, false, true, true, true, true, false, false, true, false, false, false, false, true, false, false, false, false, false, false, true, false, false, false, false, false, false, false, false, true, true, true, false, false, true, false, true, true, false, false, true, false, true, false, true, false, false, false, false, false, true, true, false, true, false, false, false, true, true, false, false, true, true, false, true, true, false, true, true, true, false, false, false, true, false, true, false, true, false, false, false, true, false, false, true, true, true, false, false, false, true, true, false, false, true, false, false, false, false, false, false, false, false, false, false, true, false, false, true, false, false, false, true, false, false, false, false, false, false, false, false, true, false, false, false, false, false, true, false, true, false, true, false, true, false, false, false, false, false, true, true, false, false, false, false, true, false, true, false, false, true, false, true, false, false, false, true, true, false, false, false, false, true, true, false, true, false, true, false, true, false, false, false, false, false, true, true, false, false, false, false, true, false, false, false, false, true, true, true, true, false, false, false, true, false, false, false, false, false, false, false, false, false, false, false, false, false, false, false, false, false, false, false, false, false, false, false, false, false, false, false, false, false, false, false, false, false, false, false, false, false, false, false, false, false, false, false, false, false, false, false, false, false, false], [false, false, false, false, false, false, false, false, false, false, false, false, false, false, false, false, false, false, false, false, false, false, true, false, false, false, true, true, false, false, false, true, false, true, false, false, true, true, false, true, false, true, false, false, true, false, false, false, false, false, false, false, true, false, true, false, true, false, false, true, false, false, false, false, false, false, false, true, false, false, false, false, false, false, false, false, false, false, false, true, false, false, false, false, false, false, false, false, false, true, false, false, false, true, false, false, false, false, false, false, false, false, false, false, false, false, false, false, false, false, false, true, false, false, false, false, false, true, false, false, false, false, false, false, false, false, false, false, true, false, false, false, true, false, false, true, false, true, false, true, false, false, false, true, false, false, false, false, false, false, true, false, false, true, false, false, false, false, false, false, false, false, false, true, true, false, false, false, false, false, false, false, false, false, false, false, false, false, false, false, true, true, false, true, false, false, false, true, true, false, false, false, false, false, false, false, false, false, false, false, false, true, true, false, false, false, false, false, false, true, false, false, false, false, true, false, false, false, false, false, false, false, false, false, false, true, false, false, true, true, false, false, true, false, true, false, true, false, false, false, true, true, false, false, true, false, false, true, false, true, false, true, false, false, true, false, false, false, false, false, false, false, false, false, true, true, true, true, false, false, true, false, false, false, false, true, false, false, false, false, false, false, true, false, false, false, false, false, false, false, false, true, true, true, false, false, true, false, true, true, false, false, true, false, true, false, true, false, false, false, false, false, true, true, false, true, false, false, false, true, true, false, false, true, true, false, true, true, false, true, true, true, false, false, false, true, false, true, false, true, false, false, false, true, false, false, true, true, true, false, false, false, true, true, false, false, true, false, false, false, false, false, false, false, false, false, false, true, false, false, true, false, false, false, true, false, false, false, false, false, false, false, false, true, false, false, false, false, false, true, false, true, false, true, false, true, false, false, false, false, false, true, true, false, false, false, false, true, false, true, false, false, true, false, true, false, false, false, true, true, false, false, false, false, true, true, false, true, false, true, false, true, false, false, false, false, false, true, true, false, false, false, false, true, false, false, false, false, true, true, true, true, false, false, false, true, false, false, false, false, false, false, false, false, false, false, false, false, false, false, false, false, false, false, false, false, false, false, false, false, false, false, false, false, false, false, false, false, false, false, false, false, false, false, false, false, false, false, false, false, false, false, false, false, false, false], [false, false, false, false, false, false, false, false, false, false, false, false, false, false, false, false, false, false, false, false, false, false, true, false, false, false, true, true, false, false, false, true, false, true, false, false, true, true, false, true, false, true, false, false, true, false, false, false, false, false, false, false, true, false, true, false, true, false, false, true, false, false, false, false, false, false, false, true, false, false, false, false, false, false, false, false, false, false, false, true, false, false, false, false, false, false, false, false, false, true, false, false, false, true, false, false, false, false, false, false, false, false, false, false, false, false, false, false, false, false, false, true, false, false, false, false, false, true, false, false, false, false, false, false, false, false, false, false, true, false, false, false, true, false, false, true, false, true, false, true, false, false, false, true, false, false, false, false, false, false, true, false, false, true, false, false, false, false, false, false, false, false, false, true, true, false, false, false, false, false, false, false, false, false, false, false, false, false, false, false, true, true, false, true, false, false, false, true, true, false, false, false, false, false, false, false, false, false, false, false, false, true, true, false, false, false, false, false, false, true, false, false, false, false, true, false, false, false, false, false, false, false, false, false, false, true, false, false, true, true, false, false, true, false, true, false, true, false, false, false, true, true, false, false, true, false, false, true, false, true, false, true, false, false, true, false, false, false, false, false, false, false, false, false, true, true, true, true, false, false, true, false, false, false, false, true, false, false, false, false, false, false, true, false, false, false, false, false, false, false, false, true, true, true, false, false, true, false, true, true, false, false, true, false, true, false, true, false, false, false, false, false, true, true, false, true, false, false, false, true, true, false, false, true, true, false, true, true, false, true, true, true, false, false, false, true, false, true, false, true, false, false, false, true, false, false, true, true, true, false, false, false, true, true, false, false, true, false, false, false, false, false, false, false, false, false, false, true, false, false, true, false, false, false, true, false, false, false, false, false, false, false, false, true, false, false, false, false, false, true, false, true, false, true, false, true, false, false, false, false, false, true, true, false, false, false, false, true, false, true, false, false, true, false, true, false, false, false, true, true, false, false, false, false, true, true, false, true, false, true, false, true, false, false, false, false, false, true, true, false, false, false, false, true, false, false, false, false, true, true, true, true, false, false, false, true, false, false, false, false, false, false, false, false, false, false, false, false, false, false, false, false, false, false, false, false, false, false, false, false, false, false, false, false, false, false, false, false, false, false, false, false, false, false, false, false, false, false, false, false, false, false, false, false, false, false], [false, false, false, false, false, false, false, false, false, false, false, false, false, false, false, false, false, false, false, false, false, false, true, false, false, false, true, true, false, false, false, true, false, true, false, false, true, true, false, true, false, true, false, false, true, false, false, false, false, false, false, false, true, false, true, false, true, false, false, true, false, false, false, false, false, false, false, true, false, false, false, false, false, false, false, false, false, false, false, true, false, false, false, false, false, false, false, false, false, true, false, false, false, true, false, false, false, false, false, false, false, false, false, false, false, false, false, false, false, false, false, true, false, false, false, false, false, true, false, false, false, false, false, false, false, false, false, false, true, false, false, false, true, false, false, true, false, true, false, true, false, false, false, true, false, false, false, false, false, false, true, false, false, true, false, false, false, false, false, false, false, false, false, true, true, false, false, false, false, false, false, false, false, false, false, false, false, false, false, false, true, true, false, true, false, false, false, true, true, false, false, false, false, false, false, false, false, false, false, false, false, true, true, false, false, false, false, false, false, true, false, false, false, false, true, false, false, false, false, false, false, false, false, false, false, true, false, false, true, true, false, false, true, false, true, false, true, false, false, false, true, true, false, false, true, false, false, true, false, true, false, true, false, false, true, false, false, false, false, false, false, false, false, false, true, true, true, true, false, false, true, false, false, false, false, true, false, false, false, false, false, false, true, false, false, false, false, false, false, false, false, true, true, true, false, false, true, false, true, true, false, false, true, false, true, false, true, false, false, false, false, false, true, true, false, true, false, false, false, true, true, false, false, true, true, false, true, true, false, true, true, true, false, false, false, true, false, true, false, true, false, false, false, true, false, false, true, true, true, false, false, false, true, true, false, false, true, false, false, false, false, false, false, false, false, false, false, true, false, false, true, false, false, false, true, false, false, false, false, false, false, false, false, true, false, false, false, false, false, true, false, true, false, true, false, true, false, false, false, false, false, true, true, false, false, false, false, true, false, true, false, false, true, false, true, false, false, false, true, true, false, false, false, false, true, true, false, true, false, true, false, true, false, false, false, false, false, true, true, false, false, false, false, true, false, false, false, false, true, true, true, true, false, false, false, true, false, false, false, false, false, false, false, false, false, false, false, false, false, false, false, false, false, false, false, false, false, false, false, false, false, false, false, false, false, false, false, false, false, false, false, false, false, false, false, false, false, false, false, false, false, false, false, false, false, false], [false, false, false, false, false, false, false, false, false, false, false, false, false, false, false, false, false, false, false, false, false, false, true, false, false, false, true, true, false, false, false, true, false, true, false, false, true, true, false, true, false, true, false, false, true, false, false, false, false, false, false, false, true, false, true, false, true, false, false, true, false, false, false, false, false, false, false, true, false, false, false, false, false, false, false, false, false, false, false, true, false, false, false, false, false, false, false, false, false, true, false, false, false, true, false, false, false, false, false, false, false, false, false, false, false, false, false, false, false, false, false, true, false, false, false, false, false, true, false, false, false, false, false, false, false, false, false, false, true, false, false, false, true, false, false, true, false, true, false, true, false, false, false, true, false, false, false, false, false, false, true, false, false, true, false, false, false, false, false, false, false, false, false, true, true, false, false, false, false, false, false, false, false, false, false, false, false, false, false, false, true, true, false, true, false, false, false, true, true, false, false, false, false, false, false, false, false, false, false, false, false, true, true, false, false, false, false, false, false, true, false, false, false, false, true, false, false, false, false, false, false, false, false, false, false, true, false, false, true, true, false, false, true, false, true, false, true, false, false, false, true, true, false, false, true, false, false, true, false, true, false, true, false, false, true, false, false, false, false, false, false, false, false, false, true, true, true, true, false, false, true, false, false, false, false, true, false, false, false, false, false, false, true, false, false, false, false, false, false, false, false, true, true, true, false, false, true, false, true, true, false, false, true, false, true, false, true, false, false, false, false, false, true, true, false, true, false, false, false, true, true, false, false, true, true, false, true, true, false, true, true, true, false, false, false, true, false, true, false, true, false, false, false, true, false, false, true, true, true, false, false, false, true, true, false, false, true, false, false, false, false, false, false, false, false, false, false, true, false, false, true, false, false, false, true, false, false, false, false, false, false, false, false, true, false, false, false, false, false, true, false, true, false, true, false, true, false, false, false, false, false, true, true, false, false, false, false, true, false, true, false, false, true, false, true, false, false, false, true, true, false, false, false, false, true, true, false, true, false, true, false, true, false, false, false, false, false, true, true, false, false, false, false, true, false, false, false, false, true, true, true, true, false, false, false, true, false, false, false, false, false, false, false, false, false, false, false, false, false, false, false, false, false, false, false, false, false, false, false, false, false, false, false, false, false, false, false, false, false, false, false, false, false, false, false, false, false, false, false, false, false, false, false, false, false, false], [false, false, false, false, false, false, false, false, false, false, false, false, false, false, false, false, false, false, false, false, false, false, true, false, false, false, true, true, false, false, false, true, false, true, false, false, true, true, false, true, false, true, false, false, true, false, false, false, false, false, false, false, true, false, true, false, true, false, false, true, false, false, false, false, false, false, false, true, false, false, false, false, false, false, false, false, false, false, false, true, false, false, false, false, false, false, false, false, false, true, false, false, false, true, false, false, false, false, false, false, false, false, false, false, false, false, false, false, false, false, false, true, false, false, false, false, false, true, false, false, false, false, false, false, false, false, false, false, true, false, false, false, true, false, false, true, false, true, false, true, false, false, false, true, false, false, false, false, false, false, true, false, false, true, false, false, false, false, false, false, false, false, false, true, true, false, false, false, false, false, false, false, false, false, false, false, false, false, false, false, true, true, false, true, false, false, false, true, true, false, false, false, false, false, false, false, false, false, false, false, false, true, true, false, false, false, false, false, false, true, false, false, false, false, true, false, false, false, false, false, false, false, false, false, false, true, false, false, true, true, false, false, true, false, true, false, true, false, false, false, true, true, false, false, true, false, false, true, false, true, false, true, false, false, true, false, false, false, false, false, false, false, false, false, true, true, true, true, false, false, true, false, false, false, false, true, false, false, false, false, false, false, true, false, false, false, false, false, false, false, false, true, true, true, false, false, true, false, true, true, false, false, true, false, true, false, true, false, false, false, false, false, true, true, false, true, false, false, false, true, true, false, false, true, true, false, true, true, false, true, true, true, false, false, false, true, false, true, false, true, false, false, false, true, false, false, true, true, true, false, false, false, true, true, false, false, true, false, false, false, false, false, false, false, false, false, false, true, false, false, true, false, false, false, true, false, false, false, false, false, false, false, false, true, false, false, false, false, false, true, false, true, false, true, false, true, false, false, false, false, false, true, true, false, false, false, false, true, false, true, false, false, true, false, true, false, false, false, true, true, false, false, false, false, true, true, false, true, false, true, false, true, false, false, false, false, false, true, true, false, false, false, false, true, false, false, false, false, true, true, true, true, false, false, false, true, false, false, false, false, false, false, false, false, false, false, false, false, false, false, false, false, false, false, false, false, false, false, false, false, false, false, false, false, false, false, false, false, false, false, false, false, false, false, false, false, false, false, false, false, false, false, false, false, false, false], [false, false, false, false, false, false, false, false, false, false, false, false, false, false, false, false, false, false, false, false, false, false, true, false, false, false, true, true, false, false, false, true, false, true, false, false, true, true, false, true, false, true, false, false, true, false, false, false, false, false, false, false, true, false, true, false, true, false, false, true, false, false, false, false, false, false, false, true, false, false, false, false, false, false, false, false, false, false, false, true, false, false, false, false, false, false, false, false, false, true, false, false, false, true, false, false, false, false, false, false, false, false, false, false, false, false, false, false, false, false, false, true, false, false, false, false, false, true, false, false, false, false, false, false, false, false, false, false, true, false, false, false, true, false, false, true, false, true, false, true, false, false, false, true, false, false, false, false, false, false, true, false, false, true, false, false, false, false, false, false, false, false, false, true, true, false, false, false, false, false, false, false, false, false, false, false, false, false, false, false, true, true, false, true, false, false, false, true, true, false, false, false, false, false, false, false, false, false, false, false, false, true, true, false, false, false, false, false, false, true, false, false, false, false, true, false, false, false, false, false, false, false, false, false, false, true, false, false, true, true, false, false, true, false, true, false, true, false, false, false, true, true, false, false, true, false, false, true, false, true, false, true, false, false, true, false, false, false, false, false, false, false, false, false, true, true, true, true, false, false, true, false, false, false, false, true, false, false, false, false, false, false, true, false, false, false, false, false, false, false, false, true, true, true, false, false, true, false, true, true, false, false, true, false, true, false, true, false, false, false, false, false, true, true, false, true, false, false, false, true, true, false, false, true, true, false, true, true, false, true, true, true, false, false, false, true, false, true, false, true, false, false, false, true, false, false, true, true, true, false, false, false, true, true, false, false, true, false, false, false, false, false, false, false, false, false, false, true, false, false, true, false, false, false, true, false, false, false, false, false, false, false, false, true, false, false, false, false, false, true, false, true, false, true, false, true, false, false, false, false, false, true, true, false, false, false, false, true, false, true, false, false, true, false, true, false, false, false, true, true, false, false, false, false, true, true, false, true, false, true, false, true, false, false, false, false, false, true, true, false, false, false, false, true, false, false, false, false, true, true, true, true, false, false, false, true, false, false, false, false, false, false, false, false, false, false, false, false, false, false, false, false, false, false, false, false, false, false, false, false, false, false, false, false, false, false, false, false, false, false, false, false, false, false, false, false, false, false, false, false, false, false, false, false, false, false], [false, false, false, false, false, false, false, false, false, false, false, false, false, false, false, false, false, false, false, false, false, false, true, false, false, false, true, true, false, false, false, true, false, true, false, false, true, true, false, true, false, true, false, false, true, false, false, false, false, false, false, false, true, false, true, false, true, false, false, true, false, false, false, false, false, false, false, true, false, false, false, false, false, false, false, false, false, false, false, true, false, false, false, false, false, false, false, false, false, true, false, false, false, true, false, false, false, false, false, false, false, false, false, false, false, false, false, false, false, false, false, true, false, false, false, false, false, true, false, false, false, false, false, false, false, false, false, false, true, false, false, false, true, false, false, true, false, true, false, true, false, false, false, true, false, false, false, false, false, false, true, false, false, true, false, false, false, false, false, false, false, false, false, true, true, false, false, false, false, false, false, false, false, false, false, false, false, false, false, false, true, true, false, true, false, false, false, true, true, false, false, false, false, false, false, false, false, false, false, false, false, true, true, false, false, false, false, false, false, true, false, false, false, false, true, false, false, false, false, false, false, false, false, false, false, true, false, false, true, true, false, false, true, false, true, false, true, false, false, false, true, true, false, false, true, false, false, true, false, true, false, true, false, false, true, false, false, false, false, false, false, false, false, false, true, true, true, true, false, false, true, false, false, false, false, true, false, false, false, false, false, false, true, false, false, false, false, false, false, false, false, true, true, true, false, false, true, false, true, true, false, false, true, false, true, false, true, false, false, false, false, false, true, true, false, true, false, false, false, true, true, false, false, true, true, false, true, true, false, true, true, true, false, false, false, true, false, true, false, true, false, false, false, true, false, false, true, true, true, false, false, false, true, true, false, false, true, false, false, false, false, false, false, false, false, false, false, true, false, false, true, false, false, false, true, false, false, false, false, false, false, false, false, true, false, false, false, false, false, true, false, true, false, true, false, true, false, false, false, false, false, true, true, false, false, false, false, true, false, true, false, false, true, false, true, false, false, false, true, true, false, false, false, false, true, true, false, true, false, true, false, true, false, false, false, false, false, true, true, false, false, false, false, true, false, false, false, false, true, true, true, true, false, false, false, true, false, false, false, false, false, false, false, false, false, false, false, false, false, false, false, false, false, false, false, false, false, false, false, false, false, false, false, false, false, false, false, false, false, false, false, false, false, false, false, false, false, false, false, false, false, false, false, false, false, false], [false, false, false, false, false, false, false, false, false, false, false, false, false, false, false, false, false, false, false, false, false, false, true, false, false, false, true, true, false, false, false, true, false, true, false, false, true, true, false, true, false, true, false, false, true, false, false, false, false, false, false, false, true, false, true, false, true, false, false, true, false, false, false, false, false, false, false, true, false, false, false, false, false, false, false, false, false, false, false, true, false, false, false, false, false, false, false, false, false, true, false, false, false, true, false, false, false, false, false, false, false, false, false, false, false, false, false, false, false, false, false, true, false, false, false, false, false, true, false, false, false, false, false, false, false, false, false, false, true, false, false, false, true, false, false, true, false, true, false, true, false, false, false, true, false, false, false, false, false, false, true, false, false, true, false, false, false, false, false, false, false, false, false, true, true, false, false, false, false, false, false, false, false, false, false, false, false, false, false, false, true, true, false, true, false, false, false, true, true, false, false, false, false, false, false, false, false, false, false, false, false, true, true, false, false, false, false, false, false, true, false, false, false, false, true, false, false, false, false, false, false, false, false, false, false, true, false, false, true, true, false, false, true, false, true, false, true, false, false, false, true, true, false, false, true, false, false, true, false, true, false, true, false, false, true, false, false, false, false, false, false, false, false, false, true, true, true, true, false, false, true, false, false, false, false, true, false, false, false, false, false, false, true, false, false, false, false, false, false, false, false, true, true, true, false, false, true, false, true, true, false, false, true, false, true, false, true, false, false, false, false, false, true, true, false, true, false, false, false, true, true, false, false, true, true, false, true, true, false, true, true, true, false, false, false, true, false, true, false, true, false, false, false, true, false, false, true, true, true, false, false, false, true, true, false, false, true, false, false, false, false, false, false, false, false, false, false, true, false, false, true, false, false, false, true, false, false, false, false, false, false, false, false, true, false, false, false, false, false, true, false, true, false, true, false, true, false, false, false, false, false, true, true, false, false, false, false, true, false, true, false, false, true, false, true, false, false, false, true, true, false, false, false, false, true, true, false, true, false, true, false, true, false, false, false, false, false, true, true, false, false, false, false, true, false, false, false, false, true, true, true, true, false, false, false, true, false, false, false, false, false, false, false, false, false, false, false, false, false, false, false, false, false, false, false, false, false, false, false, false, false, false, false, false, false, false, false, false, false, false, false, false, false, false, false, false, false, false, false, false, false, false, false, false, false, false], [false, false, false, false, false, false, false, false, false, false, false, false, false, false, false, false, false, false, false, false, false, false, true, false, false, false, true, true, false, false, false, true, false, true, false, false, true, true, false, true, false, true, false, false, true, false, false, false, false, false, false, false, true, false, true, false, true, false, false, true, false, false, false, false, false, false, false, true, false, false, false, false, false, false, false, false, false, false, false, true, false, false, false, false, false, false, false, false, false, true, false, false, false, true, false, false, false, false, false, false, false, false, false, false, false, false, false, false, false, false, false, true, false, false, false, false, false, true, false, false, false, false, false, false, false, false, false, false, true, false, false, false, true, false, false, true, false, true, false, true, false, false, false, true, false, false, false, false, false, false, true, false, false, true, false, false, false, false, false, false, false, false, false, true, true, false, false, false, false, false, false, false, false, false, false, false, false, false, false, false, true, true, false, true, false, false, false, true, true, false, false, false, false, false, false, false, false, false, false, false, false, true, true, false, false, false, false, false, false, true, false, false, false, false, true, false, false, false, false, false, false, false, false, false, false, true, false, false, true, true, false, false, true, false, true, false, true, false, false, false, true, true, false, false, true, false, false, true, false, true, false, true, false, false, true, false, false, false, false, false, false, false, false, false, true, true, true, true, false, false, true, false, false, false, false, true, false, false, false, false, false, false, true, false, false, false, false, false, false, false, false, true, true, true, false, false, true, false, true, true, false, false, true, false, true, false, true, false, false, false, false, false, true, true, false, true, false, false, false, true, true, false, false, true, true, false, true, true, false, true, true, true, false, false, false, true, false, true, false, true, false, false, false, true, false, false, true, true, true, false, false, false, true, true, false, false, true, false, false, false, false, false, false, false, false, false, false, true, false, false, true, false, false, false, true, false, false, false, false, false, false, false, false, true, false, false, false, false, false, true, false, true, false, true, false, true, false, false, false, false, false, true, true, false, false, false, false, true, false, true, false, false, true, false, true, false, false, false, true, true, false, false, false, false, true, true, false, true, false, true, false, true, false, false, false, false, false, true, true, false, false, false, false, true, false, false, false, false, true, true, true, true, false, false, false, true, false, false, false, false, false, false, false, false, false, false, false, false, false, false, false, false, false, false, false, false, false, false, false, false, false, false, false, false, false, false, false, false, false, false, false, false, false, false, false, false, false, false, false, false, false, false, false, false, false, false], [false, false, false, false, false, false, false, false, false, false, false, false, false, false, false, false, false, false, false, false, false, false, true, false, false, false, true, true, false, false, false, true, false, true, false, false, true, true, false, true, false, true, false, false, true, false, false, false, false, false, false, false, true, false, true, false, true, false, false, true, false, false, false, false, false, false, false, true, false, false, false, false, false, false, false, false, false, false, false, true, false, false, false, false, false, false, false, false, false, true, false, false, false, true, false, false, false, false, false, false, false, false, false, false, false, false, false, false, false, false, false, true, false, false, false, false, false, true, false, false, false, false, false, false, false, false, false, false, true, false, false, false, true, false, false, true, false, true, false, true, false, false, false, true, false, false, false, false, false, false, true, false, false, true, false, false, false, false, false, false, false, false, false, true, true, false, false, false, false, false, false, false, false, false, false, false, false, false, false, false, true, true, false, true, false, false, false, true, true, false, false, false, false, false, false, false, false, false, false, false, false, true, true, false, false, false, false, false, false, true, false, false, false, false, true, false, false, false, false, false, false, false, false, false, false, true, false, false, true, true, false, false, true, false, true, false, true, false, false, false, true, true, false, false, true, false, false, true, false, true, false, true, false, false, true, false, false, false, false, false, false, false, false, false, true, true, true, true, false, false, true, false, false, false, false, true, false, false, false, false, false, false, true, false, false, false, false, false, false, false, false, true, true, true, false, false, true, false, true, true, false, false, true, false, true, false, true, false, false, false, false, false, true, true, false, true, false, false, false, true, true, false, false, true, true, false, true, true, false, true, true, true, false, false, false, true, false, true, false, true, false, false, false, true, false, false, true, true, true, false, false, false, true, true, false, false, true, false, false, false, false, false, false, false, false, false, false, true, false, false, true, false, false, false, true, false, false, false, false, false, false, false, false, true, false, false, false, false, false, true, false, true, false, true, false, true, false, false, false, false, false, true, true, false, false, false, false, true, false, true, false, false, true, false, true, false, false, false, true, true, false, false, false, false, true, true, false, true, false, true, false, true, false, false, false, false, false, true, true, false, false, false, false, true, false, false, false, false, true, true, true, true, false, false, false, true, false, false, false, false, false, false, false, false, false, false, false, false, false, false, false, false, false, false, false, false, false, false, false, false, false, false, false, false, false, false, false, false, false, false, false, false, false, false, false, false, false, false, false, false, false, false, false, false, false, false], [false, false, false, false, false, false, false, false, false, false, false, false, false, false, false, false, false, false, false, false, false, false, true, false, false, false, true, true, false, false, false, true, false, true, false, false, true, true, false, true, false, true, false, false, true, false, false, false, false, false, false, false, true, false, true, false, true, false, false, true, false, false, false, false, false, false, false, true, false, false, false, false, false, false, false, false, false, false, false, true, false, false, false, false, false, false, false, false, false, true, false, false, false, true, false, false, false, false, false, false, false, false, false, false, false, false, false, false, false, false, false, true, false, false, false, false, false, true, false, false, false, false, false, false, false, false, false, false, true, false, false, false, true, false, false, true, false, true, false, true, false, false, false, true, false, false, false, false, false, false, true, false, false, true, false, false, false, false, false, false, false, false, false, true, true, false, false, false, false, false, false, false, false, false, false, false, false, false, false, false, true, true, false, true, false, false, false, true, true, false, false, false, false, false, false, false, false, false, false, false, false, true, true, false, false, false, false, false, false, true, false, false, false, false, true, false, false, false, false, false, false, false, false, false, false, true, false, false, true, true, false, false, true, false, true, false, true, false, false, false, true, true, false, false, true, false, false, true, false, true, false, true, false, false, true, false, false, false, false, false, false, false, false, false, true, true, true, true, false, false, true, false, false, false, false, true, false, false, false, false, false, false, true, false, false, false, false, false, false, false, false, true, true, true, false, false, true, false, true, true, false, false, true, false, true, false, true, false, false, false, false, false, true, true, false, true, false, false, false, true, true, false, false, true, true, false, true, true, false, true, true, true, false, false, false, true, false, true, false, true, false, false, false, true, false, false, true, true, true, false, false, false, true, true, false, false, true, false, false, false, false, false, false, false, false, false, false, true, false, false, true, false, false, false, true, false, false, false, false, false, false, false, false, true, false, false, false, false, false, true, false, true, false, true, false, true, false, false, false, false, false, true, true, false, false, false, false, true, false, true, false, false, true, false, true, false, false, false, true, true, false, false, false, false, true, true, false, true, false, true, false, true, false, false, false, false, false, true, true, false, false, false, false, true, false, false, false, false, true, true, true, true, false, false, false, true, false, false, false, false, false, false, false, false, false, false, false, false, false, false, false, false, false, false, false, false, false, false, false, false, false, false, false, false, false, false, false, false, false, false, false, false, false, false, false, false, false, false, false, false, false, false, false, false, false, false], [false, false, false, false, false, false, false, false, false, false, false, false, false, false, false, false, false, false, false, false, false, false, true, false, false, false, true, true, false, false, false, true, false, true, false, false, true, true, false, true, false, true, false, false, true, false, false, false, false, false, false, false, true, false, true, false, true, false, false, true, false, false, false, false, false, false, false, true, false, false, false, false, fals
[truncated: 2,978,946 more chars]
