# Supplementary material
Source: ML conference proceedings conference paper supplement (https://proceedings.neurips.cc/paper_files/paper/2022/hash/9d3faa41886997cfc2128b930077fa49-Abstract.html)
Supplement: Supplementary file 1 [file 9d3faa41886997cfc2128b930077fa49-Supplemental-Conference.zip › code/src/hawkes/hawkes_example.ipynb]

# %% [code]
import numpy as np
import matplotlib.pyplot as plt
import os
import sys
from hawkes import hawkes, sampleHawkes, plotHawkes, iterative_sampling, extract_samples, sample_counterfactual_superposition, check_monotonicity_hawkes
sys.path.append(os.path.abspath('../'))
from sampling_utils import thinning_T

# %% [markdown]
This notebook contains an example of running algorithm 3 (in the paper) for both cases where we have (1) both observed and un-observed events, and (2) the case that we have only the observed events.

# %% [markdown]
# 1. Sampling From Lambda_max

# %% [code]
# required parameters
mu0 = 1
alpha = 1
w = 1
lambda_max = 3
T = 5
def constant1(x): return mu0
# sampling from hawkes using the superposition property
initial_sample, indicators = thinning_T(0, constant1, lambda_max, T)
events = {initial_sample[i]: indicators[i] for i in range(len(initial_sample))}
all_events = {}
all_events[mu0] = events
iterative_sampling(all_events, events, mu0, alpha, w, lambda_max, T)
# plotting hawkes
sampled_events = list(all_events.keys())[1:]
sampled_events.sort()
sampled_events = np.array(sampled_events)
sampled_lambdas = hawkes(sampled_events, mu0, alpha, w)
plt.figure(figsize=(10, 8))
tvec, l_t = plotHawkes(sampled_events, constant1, alpha, w, T, 10000.0, label= 'intensity', color = 'r+', legend= 'accepted')
plt.plot(sampled_events, sampled_lambdas, 'r^')
plt.legend()
plt.show() 

# %% [code]
# extract all sampled events from all_events dictionary.
all_samples, all_lambdas = extract_samples(all_events, sampled_events, mu0, alpha, w)

# %% [code]
# plots all events, both accepted and rejected with their intensities.
plt.figure(figsize=(10, 8))
plt.plot(tvec, l_t, label = 'Original Intensity')
plt.plot(all_samples, all_lambdas, 'oy', label = 'events')
plt.plot(sampled_events,sampled_lambdas, 'r+', label = 'accepted')
plt.xlabel('time')
plt.ylabel('intensity')
plt.legend()

# %% [code]
# sampling from the counterfactual intensity.
new_mu0 = 3
new_alpha = 0.1
real_counterfactuals = sample_counterfactual_superposition(mu0, alpha, new_mu0, new_alpha, all_events, lambda_max, w, T)

# %% [markdown]
**The red +s are the counterfactuals.**

# %% [code]
plt.figure(figsize=(15, 6))
plotHawkes(np.array(real_counterfactuals), lambda t: new_mu0, new_alpha, w, T, 10000.0, label= 'counterfactul intensity', color = 'g+', legend= 'accepted in counterfactual')
plt.plot(tvec, l_t, label = 'Original Intensity')
plt.plot(all_samples, all_lambdas, 'oy', label = 'events')
plt.plot(sampled_events,sampled_lambdas, 'r^')
plt.plot(sampled_events,np.full(len(sampled_events), -0.1), 'r+', label = 'originally accepted')
for xc in real_counterfactuals:
    plt.axvline(x=xc, color = 'k', ls = '--', alpha = 0.2)
plt.xlabel('time')
plt.ylabel('intensity')
plt.legend() 

# %% [markdown]
In the following cell, we will check monotonicity property. Note that this property should hold in **each exponential created by superposition** (please have a look at `check_monotonicity_hawkes` in `hawkes.py` for more details.). 

# %% [code]
check_monotonicity_hawkes(mu0, alpha, new_mu0, new_alpha, all_events, sampled_events, real_counterfactuals, w)

# %% [markdown]
# 2. Real-World Scenario

# %% [code]
# First, we sample from the hawkes process using the Ogata's algorithm (or any other sampling method), but only store the accepted events.
plt.figure(figsize=(10, 8))
mu0 = 1
alpha = 1
w = 1
lambda_max = 3
T = 5
tev, tend, lambdas_original = sampleHawkes(mu0, alpha, w, T, Nev= 100)
tvec, l_t = plotHawkes(tev, lambda t: mu0, alpha, w, T, 10000.0, label = 'Original Intensity', color= 'r+', legend= 'samples')
plt.plot(tev, lambdas_original, 'r^')
plt.legend()

# %% [code]
# this list stores functions corresponding to each exponential.
exponentials = []
all_events = {}
exponentials.append(lambda t: mu0)
all_events[mu0] = {}
for i in range(len(tev)):
    exponentials.append(lambda t: alpha * np.exp(-w * (t - tev[i])))
    all_events[tev[i]] = {}

# we should assign each accepted event to some exponential. (IMPORTANT)
for i in range(len(tev)):
    if i == 0:
        all_events[mu0][tev[i]] = True
    else:
        probabilities = [exponentials[j](tev[i]) for j in range(0, i + 1)]
        probabilities = [float(i)/sum(probabilities) for i in probabilities]
        a = np.random.choice(i + 1, 1, p = probabilities)
        if a == 0:
            all_events[mu0][tev[i]] = True
        else:
            all_events[tev[a[0] - 1]][tev[i]] = True

# %% [code]
# using the superposition to calculate the difference between lambda_max and the exponentials, and sample from it.
differences = []
differences.append(lambda t: lambda_max - mu0)
for k in range(len(tev)):
    f = lambda t: lambda_max - alpha * np.exp(-w * (t - tev[k]))
    differences.append(f)

for i in range(len(differences)):
    if i == 0:
        rejceted, indicators = thinning_T(0, differences[i], lambda_max, T)
    else:
        rejceted, indicators = thinning_T(tev[i - 1], differences[i], lambda_max, T)
    
    rejceted = {rejceted[j]: False for j in range(len(rejceted)) if indicators[j] == True}
    if i == 0:
        all_events[mu0].update(rejceted)
        all_events[mu0] = {k:v for k,v in sorted(all_events[mu0].items())}
    else:
        all_events[tev[i - 1]].update(rejceted)
        all_events[tev[i - 1]] = {k:v for k,v in sorted(all_events[tev[i - 1]].items())}


# %% [code]
all_samples, all_lambdas = extract_samples(all_events, tev, mu0, alpha, w)

# %% [code]
plt.figure(figsize=(10, 8))
plt.plot(tvec, l_t, label = 'Original Intensity')
plt.plot(all_samples, all_lambdas, 'oy', label = 'events')
plt.plot(tev,lambdas_original, 'r+', label = 'accepted')
plt.xlabel('time')
plt.ylabel('intensity')
plt.legend()

# %% [code]
new_mu0 = 0.1
new_alpha = 1.7
real_counterfactuals = sample_counterfactual_superposition(mu0, alpha, new_mu0, new_alpha, all_events, lambda_max, w, T)

# %% [markdown]
**The red +s are the counterfactuals.**

# %% [code]
plt.figure(figsize=(15, 8))
plotHawkes(np.array(real_counterfactuals), lambda t: new_mu0, new_alpha, w, T, 10000.0, label= 'counterfactual intensity', color= 'g+', legend= 'accepted in counterfactual')
plt.plot(tvec, l_t, label = 'Original Intensity')
plt.plot(all_samples, all_lambdas, 'oy', label = 'events')
plt.plot(tev,lambdas_original, 'r^')
plt.plot(tev,np.full(len(tev), -0.1), 'r+', label = 'originally accepted')
for xc in real_counterfactuals:
    plt.axvline(x=xc, color = 'k', ls = '--', alpha = 0.2)
plt.xlabel('time')
plt.ylabel('intensity')
plt.legend() 

# %% [code]
check_monotonicity_hawkes(mu0, alpha, new_mu0, new_alpha, all_events, tev, real_counterfactuals, w) 
