# Supplementary material
Source: ML conference proceedings conference paper supplement (https://proceedings.neurips.cc/paper_files/paper/2022/hash/9d3faa41886997cfc2128b930077fa49-Abstract.html)
Supplement: Supplementary file 1 [file 9d3faa41886997cfc2128b930077fa49-Supplemental-Conference.zip › code/src/inhomogeneous_experiments.ipynb]

# %% [markdown]
Dependencies

# %% [code]
import numpy as np
import pandas as pd
import seaborn as sns
import scipy
import matplotlib.pyplot as plt
import os
import sys
from counterfactual_tpp import sample_counterfactual, superposition, combine, check_monotonicity, distance
from sampling_utils import homogenous_poisson, thinning, thinning_T
from multiprocessing import cpu_count, Pool
from tqdm import tqdm
import utils

# %% [code]
cpu_count()

# %% [code]
def normal(x, mean, sd, amp):  
    return amp * (1/(sd * (np.sqrt(2*np.pi)))) * np.exp(-0.5*((x-mean)/sd)**2)

# Setting the parameters of the original intensity
T = 5
number_of_gaussians = 5
np.random.seed(0)
means = np.arange(1, T , step = (T - 1) / number_of_gaussians)
means[0] = 0.55
sds = np.random.uniform(low=0, high=0.5, size=number_of_gaussians)
amps = 10 * np.random.uniform(low=1.0, high=3.0, size=number_of_gaussians)
print('means', means)
print('sds', sds)
print('amps', amps)
#**********************
def original(x):
    res = 0
    for i in range(number_of_gaussians):
        res += normal(x, means[i], sds[i], amps[i])
    return res

# %% [code]
# plotting the original intensity
x = np.linspace(0, T, 10000)
sns.lineplot(data = pd.DataFrame({'time':x, 'intensity':original(x)}), x="time", y="intensity")

# %% [code]
# intervention intensity
#******************* To replicate figure 5:
# run this cell 1 time for lambda'>lambda
# run this cell 12 times for lambda'<lambda 
modified_index = np.random.choice(a = np.arange(number_of_gaussians), size = 1)[0]
print('index', modified_index)
new_amp = amps[modified_index] + np.random.normal(loc=0.0, scale=10, size=1)
print('previous amp', amps[modified_index])
print('new amp', new_amp)
new_amps = np.zeros(amps.shape)
for i in range(len(new_amps)):
    if i == modified_index:
        new_amps[i] = new_amp[0]
    else:
        new_amps[i] = amps[i]
                    
def intervention(x):
    res = 0
    for i in range(number_of_gaussians):
        res += normal(x, means[i], sds[i], new_amps[i])
    return res

# %% [markdown]
Run this if lambda'< lambda

# %% [code]
window_radious = (means[modified_index] - means[modified_index - 1]) / 2
window_center = means[modified_index]

# %% [markdown]
Run this if lambda'>lambda

# %% [code]
# window_radious = (means[modified_index + 1] - means[modified_index]) / 2
# window_center = means[modified_index]

# %% [code]
# specifying interventional intervall.
begin = window_center - window_radious
end = window_center + window_radious
if begin < 0:
    t = 0 - begin
    begin = 0
    end = end - t
print('beginning of the interval: ', begin)
print('ending of the interval: ', end)
print('window center', window_center)

# %% [code]
path = 'figs/new_figs/'

# %% [code]
# Visualizing both intensities
sns.lineplot(data = pd.DataFrame({'time':x, 'intensity':original(x)}), x="time", y="intensity", label = 'Original')
sns.lineplot(data = pd.DataFrame({'time':x, 'intensity':intervention(x)}), x="time", y="intensity", label = 'Intervention')
plt.legend()

# %% [code]
lambda_max = 100

# %% [code]
def counterfactual(_):
    sample, indicators = thinning_T(0, intensity=original, lambda_max=lambda_max, T=T)
    lambdas = original(np.asarray(sample))
    sample = np.asarray(sample)
    counters = []
    for counter in range(100):
        counterfactuals, counterfactual_indicators = sample_counterfactual(sample, lambdas, lambda_max, indicators, intervention)
        counters.append(counterfactuals)
    return sample[indicators], counters

# %% [code]
def counterfactual1(_):
    sample, indicators = thinning_T(0, intensity=original, lambda_max=lambda_max, T=T)
    lambdas = original(np.asarray(sample))
    sample = np.asarray(sample)
    counters = []
    for counter in range(100):
        counterfactuals, counterfactual_indicators = sample_counterfactual(sample, lambdas, lambda_max, indicators, intervention)
        if check_monotonicity(sample, counterfactuals, original, intervention, sample[indicators]) != 'MONOTONIC':
            print('Not monotonic')
        counters.append(counterfactuals)
    return sample[indicators], counters, sample, indicators

# %% [code]
def counterfactual2(_):
    sample = samples_load[_]
    indicators = indicators_load[_]
    h_observed = sample[indicators]
    lambda_observed = [original(i) for i in h_observed]
    lambda_bar = lambda x: lambda_max - original(x)
    h_rejected, _ = thinning_T(0, intensity=lambda_bar, lambda_max=lambda_max,T=T)
    sample, _, indicators = combine(h_observed, lambda_observed, h_rejected, original)
    lambdas = original(sample)
    counters = []
    for counter in range(100):
        counterfactuals, counterfactual_indicators = sample_counterfactual(sample, lambdas, lambda_max, indicators, intervention)
        if check_monotonicity(sample, counterfactuals, original, intervention, sample[indicators]) != 'MONOTONIC':
            print('Not monotonic')
        counters.append(counterfactuals)
    return sample[indicators], counters

# %% [markdown]
Run the following 3 cells in order to generate youe new samples, othewise skip the cell and continue to load our generated data and replicate the paper results.

# %% [code]
# with Pool(48) as pool:
#     result = list(tqdm(pool.imap(counterfactual1, list(range(1000))), total = 1000))

# %% [code]
# # Save
# all_samples_save = [result[i][2] for i in range(1000)]
# import json
# np.save('Data/allsamples.npy', all_samples_save, allow_pickle=True)

# %% [code]
# all_indicators_save = [result[i][3] for i in range(1000)]
# with open('Data/allindicators.json', 'w') as fout:
#     json.dump(all_indicators_save , fout)

# %% [markdown]
The following cells will read our ramdomly generated data in order to replecate the paper results.

# %% [code]
samples_load = np.load('data_inhomogeneous/allsamples.npy', allow_pickle=True)

# %% [code]
import json
with open(r'data_inhomogeneous/allindicators.json', "r") as read_file:
    indicators_load = json.load(read_file)

# %% [code]
f = [samples_load[i][indicators_load[i]] for i in range(1000)]

# %% [code]
with Pool(48) as pool:
    result = list(tqdm(pool.imap(counterfactual2, list(range(1000))), total = 1000))

# %% [code]
def count_interval(start, end, samples):
    return len(samples[(start <= samples) & (samples < end)])

def filter_interval(start, end, samples):
    return samples[(start <= samples) & (samples < end)]

    
def distance(accepted, counterfactuals, T):
    # Calculates the distance between oserved and counterfactual realizaitons
    k1 = len(accepted)
    k2 = len(counterfactuals)
    if k1 <= k2:
        d = np.sum(np.abs(accepted[0:k1] - counterfactuals[0:k1]))
        if k2 - k1 > 0:
            d += np.sum(np.abs(T - counterfactuals[k1:]))
    else:
        d = np.sum(np.abs(accepted[0:k2] - counterfactuals[0:k2]))
        if k1 - k2 > 0:
            d += np.sum(np.abs(T - accepted[k2:]))
    return d

def count_bins(start, end, delta, samples):
    intervals = np.arange(start, end, delta)
    bins = np.zeros(len(intervals) - 1)
    for i in range(len(bins)):
        bins[i] = count_interval(intervals[i], intervals[i + 1], samples)
    return bins, intervals

# %% [code]
number_of_events = [count_interval(window_center - window_radious, window_center + window_radious, f[i]) for i in range(len(f))]
len(number_of_events)

# %% [code]
number_of_groups = 3
quantile_indices = pd.qcut(number_of_events, number_of_groups, labels = range(number_of_groups)).to_numpy()

# %% [code]
pd.qcut(number_of_events, number_of_groups, labels = range(number_of_groups))

# %% [code]
pd.qcut(number_of_events, number_of_groups, labels = range(number_of_groups), retbins=True)

# %% [markdown]
The following includes the pre-processings needed for binning and plotting.

# %% [code]
groups = [[] for i in range(number_of_groups)]
groups_general = [[] for i in range(number_of_groups)]
for i in range(1000):
    k = quantile_indices[i]
    groups[k].extend(result[i][1])
    groups_general[k].append(f[i])
    
for i in range(number_of_groups):
    print(len(groups_general[i]) / 100)

# %% [code]
delta = 0.09 # 0.1 for lambda'>lambda
number_of_bins = len(np.arange(begin, end, delta)) - 1
bin_numbers = []
for i in range(number_of_groups):
    bin_number = np.zeros(number_of_bins)
    
    for counter in groups[i]:
        num , _ = count_bins(begin, end, delta, np.array(counter))
        
        bin_number += num
         
    bin_number = bin_number / len(groups[i]) 
    bin_numbers.append(bin_number)

# %% [code]
delta = 0.09
number_of_bins = len(np.arange(begin, end, delta)) - 1
original_bin_numbers = []
for i in range(number_of_groups):
    bin_number = np.zeros(number_of_bins)
    
    for ori in groups_general[i]:
        num , _ = count_bins(begin, end, delta, np.array(ori))
        
        bin_number += num
         
    bin_number = bin_number / len(groups_general[i]) 
#     bin_number = bin_number / delta 
    original_bin_numbers.append(bin_number)

# %% [code]
width_pt = 397
fig_height, fig_aspect = utils.get_fig_dim(width_pt, fraction=0.65)

# %% [code]
plt.style.use(['science','no-latex'])
plt.rcParams["axes.spines.right"] = False
plt.rcParams["axes.spines.top"] = False
plt.rcParams["xtick.top"] = False
plt.rcParams["ytick.right"] = False

# %% [code]
fig, ax = plt.subplots(figsize=(fig_height*fig_aspect,fig_height))
ax.plot(x, original(x), label = 'original')
ax.plot(x, intervention(x), label = 'intervention')
ax.set_xlabel('time', fontsize = 10)
ax.set_ylabel('intensity', fontsize = 10)
ax.axvline(x=begin, color = 'k', ls = '--', alpha = 0.5)
ax.axvline(x=end, color = 'k', ls = '--', alpha = 0.5)
ax.legend(loc='lower right', fontsize = 10)
ax.set_xticks(np.arange(0,T +1,1))
ax.set_yticks(np.arange(0,60,10))
# plt.savefig('{}/intensities1.pdf'.format(path), format = 'pdf', dpi = 900)

# %% [code]
fig, ax = plt.subplots(figsize=(fig_height*fig_aspect,fig_height))
k = 0 # k = 0 or 1 0r 2
weights = [0.25, 0.5, 0.25]
out_f = np.convolve(bin_numbers[k],np.array(weights)[::-1],'same')
out_o = np.convolve(original_bin_numbers[k],np.array(weights)[::-1],'same')
s = len(out_f)
xnew_bar = np.arange(begin, end, delta)
xnew_bar = 0.5 * (xnew_bar[:-1] + xnew_bar[1:])
for i in range(len(out_f)):
    a = np.abs(out_f[i]) # counterfactual
    b = np.abs(out_o[i]) # original
    if a > b:
        ax.bar(xnew_bar[i], a, label='cubic', width = delta, color = 'yellowgreen', edgecolor='green')
        ax.bar(xnew_bar[i], b, label='cubic', width = delta, color = 'white', edgecolor='grey')
    else:
        ax.bar(xnew_bar[i], b, label='cubic', width = delta, color = 'salmon', edgecolor='red')
        ax.bar(xnew_bar[i], a, label='cubic', width = delta, color = 'white', edgecolor='grey')
        
    
# ax.bar(xnew_bar, np.abs(f_cubic[2](xnew_bar)), label='cubic', width = (end - begin) / 17, color = 'yellowgreen')
# ax.bar(xnew_bar, np.abs(o_cubic[2](xnew_bar)), label='cubic', width = (end - begin) / 17, color = 'red')
ax.set_xlabel('time')
ax.set_ylabel('Average Number \n of Events')
ax.set_yticks(np.arange(0,6,1))
ax.set_xticks(np.arange(begin,end,0.2))
# plt.savefig('{}/groups1_{}_lmax_{}_delta_{}.pdf'.format(path, k + 1, lambda_max, delta), format = 'pdf', dpi = 900)
